# Supplementary material for: Transcriptome Profiles of Populus euphratica upon Heat Shock stress
Source: PubMed Central journal article supplement — Curr Genomics. 2014 Oct;15(5):326–40. doi: 10.2174/138920291505141106101835 (PMC4245693; doi:10.2174/138920291505141106101835), 2014-10
Supplement: CG-15-326_SD1.pdf [file CG-15-326_SD1.pdf]

## Supplementary Materials

### Transcriptome Profiles of *Populus euphratica* upon Heat Shock stress

Jinhuan Chen<sup>1,2</sup>, Weilun Yin<sup>1,2,\*</sup> and Xinli Xia<sup>1,2,\*</sup>

<sup>1</sup>National Engineering Laboratory for Tree Breeding, Beijing Forestry University Beijing 100083, China; <sup>2</sup>College of Biological Sciences and technology, Beijing Forestry University Beijing 100083, China

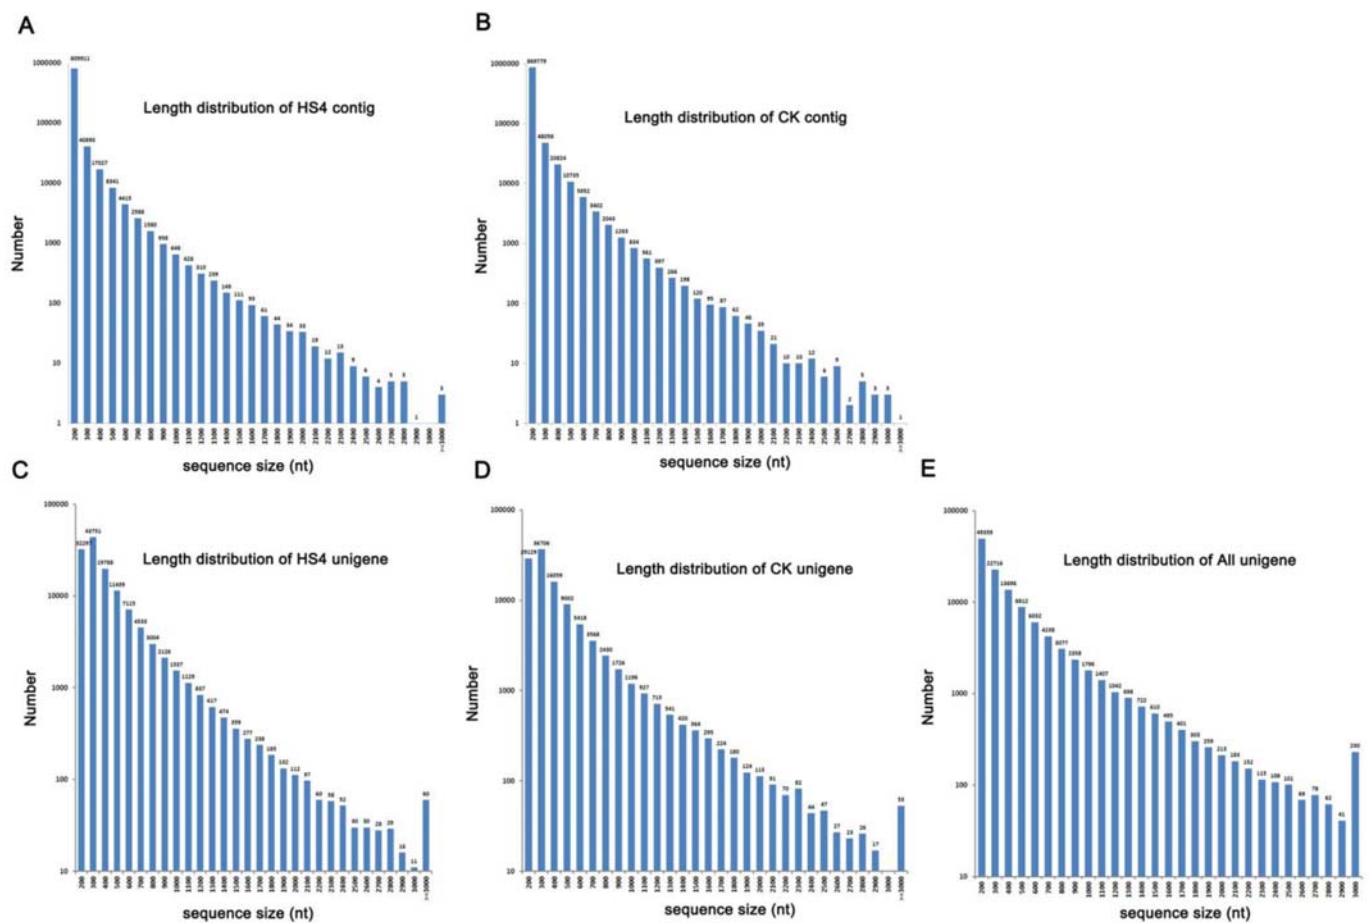

Fig. (S1). Length distribution of the contigs and unigenes.

Length distribution of contigs obtained from *de novo* assembly of clean “reads” (A-B). Length distribution of unigenes produced by contig joining (C-E).

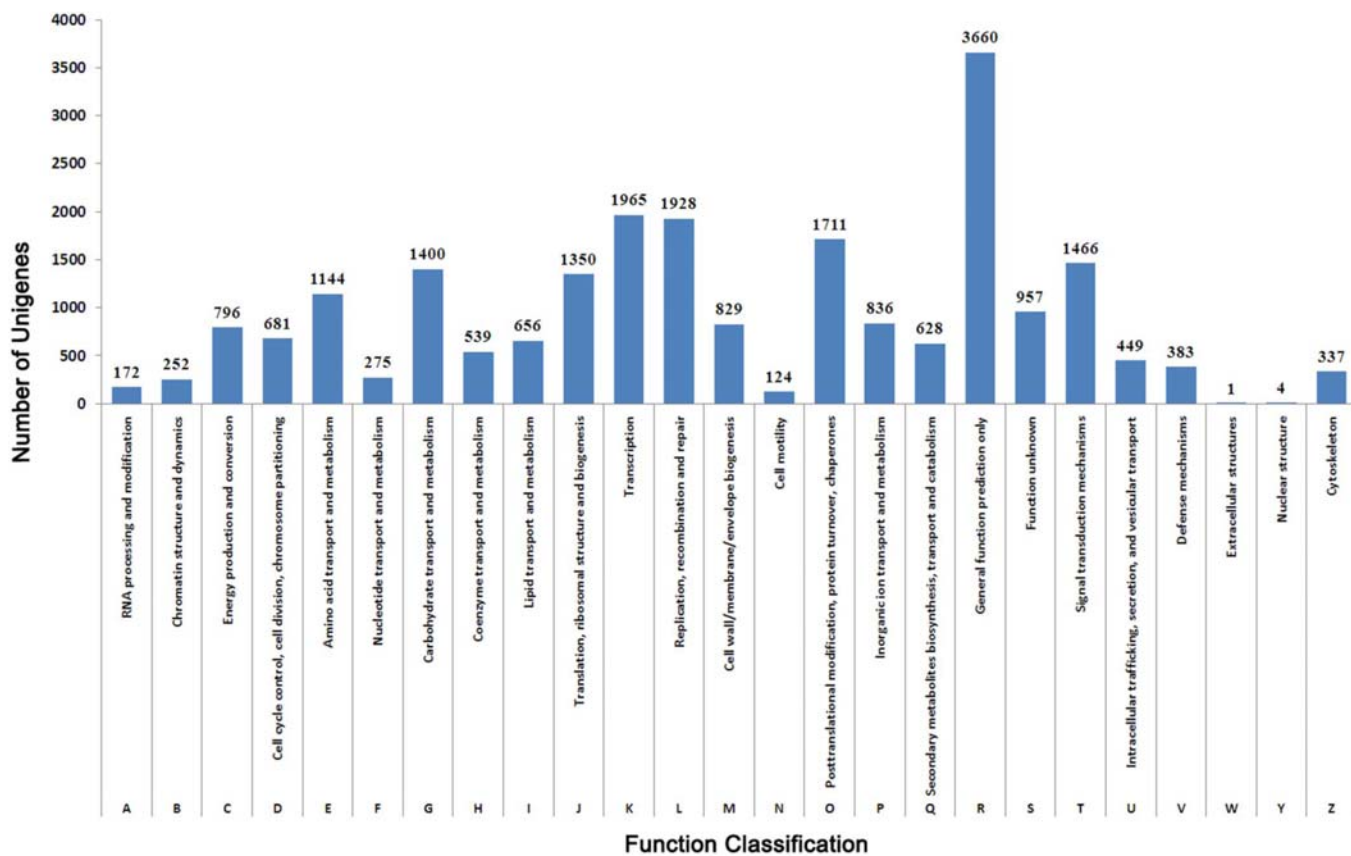

Fig. (S2). COG functional classification of the *P. euphratica* transcriptome.

About 23,334 unigenes with significant homologies were classified into 25 COG categories according to in the COG database (E-value  $\leq 1.0 \times 10^{-5}$ ). The capital letters in x-axis indicates the COG categories as listed on the right of the histogram, and the y-axis indicates the number of unigenes.

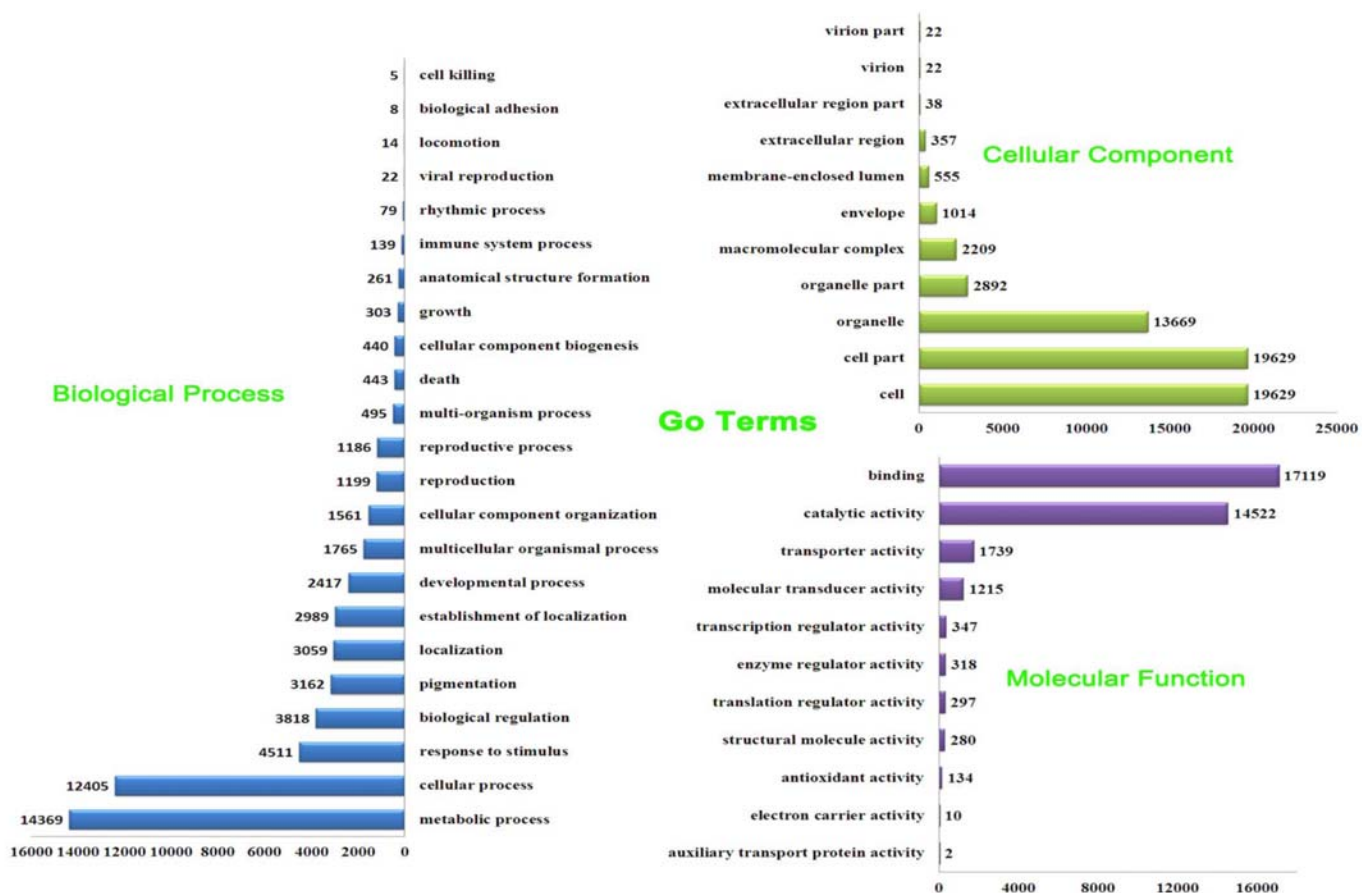

Fig. (S3). Gene Ontolog (GO) distributions for the *P. euphratica* transcriptome.

Based on highscore BLASTx matches in the NR plant proteins database, *P. euphratica* unigene were classified into three main GO categories and 31 sub-categories. The left Y-axis indicates the percentage of a specific category of genes in each main category. The right Y-axis indicates the number of genes in the same category.

Table S1. Oligonucleotide used in qPCR analysis.

| Gene Name     | Primer | Sequence (5'-3')      |
|---------------|--------|-----------------------|
| Unigene117613 | 13F    | CAAGAGCATAAACCTGACG   |
|               | 13R    | TCATCACACCACCAGCAGT   |
| Unigene117112 | 02F    | AGCAGTTGGAAGATGGACG   |
|               | 02R    | GCATTGGAGACACCGGTA    |
| Unigene118203 | 03F    | CATCAACCCACTCTGAGGTC  |
|               | 03R    | AACTGCCTGCGAACCATC    |
| Unigene117779 | 79F    | CCCGAATAACAAGAAAGAAGC |
|               | 79R    | AAGGTTGCTCCTCCTGGA    |
| Unigene119554 | 54F    | AGCAGTCAAGGGAACACG    |
|               | 54R    | TGAGTCTCCTCTTACGCC    |
| Unigene100969 | 26F    | GATGCTTGCGTTGAAGTTG   |
|               | 26R    | CATTCTGTTGCTGCTGTCTG  |

|               |     |                         |
|---------------|-----|-------------------------|
| Unigene115732 | 32F | CGTTCTGGCTGGTGATG       |
|               | 32R | ATGGCAAACCTGGGTCTGG     |
| Unigene114471 | 04F | GGTCACTGGAGAGTATGGTTG   |
|               | 04R | GTCATTCTTGTCAGCATCAGC   |
| Unigene111646 | 46F | AGATGAGGGAGATGGAGGG     |
|               | 46R | CCGTAGAAGAATCACTTGAAGG  |
| Unigene113416 | 16F | GGCACAATCACAAATCCG      |
|               | 16R | TCCCTCCAGTTTACCTTGG     |
| Unigene119507 | 07F | GGGAGCCGAAATGACAGT      |
|               | 07R | TGCCAATCCAATCCTTGAT     |
| Unigene102065 | 65F | CGTATTCTGTTCGGTTCCTG    |
|               | 65R | CGCTGCCTCTCCTTCATT      |
| Unigene107062 | 62F | TCTCCAACCGCAGACTTG      |
|               | 62R | CCTCAGTAACAATGCCAGCA    |
| Unigene 99983 | 83F | TTTCCTTTGACAGTGCTGG     |
|               | 83R | ATCATTCCTACTCGCCG       |
| Unigene 40527 | 27F | CCAACCGAGTAATGAATGGT    |
|               | 27R | CCTCTAAACAACCTTCTGGC    |
| Unigene 99478 | 68F | CATAGTGGAGTGGGAGCATC    |
|               | 68R | TGTCAACGAACAAAGGTATCAG  |
| Unigene 45266 | 66F | TGCTGGCTCAAGTATCAGTGT   |
|               | 66R | GCAACTCACCTTTGTAGACCAC  |
| Unigene95637  | 37F | CCAGAGAAACCATCAACTACTCC |
|               | 37R | GCCATCCCCTACTTGTGTC     |
| Unigene105908 | 08F | GGTCTTCCTTTGTTTACCCG    |
|               | 08R | CCAACTGGTTTCCCATCA      |
| Unigene 21605 | 05F | TCCACTGCTAAACTCATCACC   |
|               | 05R | TACGGAGGGTAACCATTGG     |

Additional File 5 Oligonucleotide used in this study.

**Table S2. Differently expressed unigenes between two samples.**

| Gene ID      | Poplar v3 Model    | HS4_RPKM | CK_RPKM | Log2 (Fold Change) | Up/Down | P-value   | FDR       |
|--------------|--------------------|----------|---------|--------------------|---------|-----------|-----------|
| Unigene80702 | Potri.014G069100.5 | 148.8998 | 0       | 17.184             | Up      | 2.73E-285 | 2.26E-283 |
| Unigene72886 | Potri.011G057600.1 | 135.2109 | 0       | 17.0449            | Up      | 1.03E-215 | 5.83E-214 |
| Unigene83212 | Potri.008G157600.1 | 118.3248 | 0       | 16.8524            | Up      | 3.12E-242 | 2.06E-240 |
| Unigene85094 | Potri.002G049100.1 | 106.7945 | 0       | 16.7045            | Up      | 2.15E-233 | 1.35E-231 |
| Unigene79914 | Potri.014G124500.1 | 95.3042  | 0       | 16.5403            | Up      | 3.25E-179 | 1.47E-177 |
| Unigene76094 | Potri.003G113400.4 | 94.0815  | 0       | 16.5216            | Up      | 8.06E-162 | 3.19E-160 |
| Unigene75748 | Potri.001G117400.3 | 91.0647  | 0       | 16.4746            | Up      | 2.91E-155 | 1.09E-153 |

|              |                    |         |   |         |    |           |           |
|--------------|--------------------|---------|---|---------|----|-----------|-----------|
| Unigene86042 | Potri.002G249900.2 | 83.0135 | 0 | 16.3411 | Up | 3.40E-189 | 1.66E-187 |
| Unigene88221 | Potri.001G192600.1 | 79.5875 | 0 | 16.2803 | Up | 6.93E-201 | 3.62E-199 |
| Unigene79765 | Potri.008G157600.1 | 77.9622 | 0 | 16.2505 | Up | 3.88E-146 | 1.34E-144 |
| Unigene78433 | Potri.004G124800.3 | 73.34   | 0 | 16.1623 | Up | 1.37E-133 | 4.22E-132 |
| Unigene92961 | Potri.T125900.1    | 72.3797 | 0 | 16.1433 | Up | 5.36E-289 | 4.53E-287 |
| Unigene76364 | Potri.002G165000.1 | 71.2836 | 0 | 16.1213 | Up | 2.52E-123 | 7.01E-122 |
| Unigene79196 | Potri.001G154200.2 | 71.1942 | 0 | 16.1195 | Up | 7.03E-132 | 2.13E-130 |
| Unigene89256 | Potri.001G402000.2 | 64.0787 | 0 | 15.9676 | Up | 1.18E-172 | 5.04E-171 |
| Unigene71385 | Potri.005G214000.1 | 61.3697 | 0 | 15.9052 | Up | 5.97E-96  | 1.21E-94  |
| Unigene86540 | Potri.003G173900.2 | 59.9501 | 0 | 15.8715 | Up | 1.41E-139 | 4.58E-138 |
| Unigene79428 | Potri.016G071300.1 | 57.0282 | 0 | 15.7994 | Up | 3.24E-106 | 7.45E-105 |
| Unigene77304 | Potri.015G070700.1 | 55.1385 | 0 | 15.7508 | Up | 1.16E-97  | 2.41E-96  |
| Unigene73112 | Potri.006G088000.2 | 53.7185 | 0 | 15.7131 | Up | 1.53E-86  | 2.75E-85  |
| Unigene71423 | Potri.009G034000.1 | 53.1013 | 0 | 15.6965 | Up | 4.05E-83  | 6.92E-82  |
| Unigene94306 | Potri.005G110400.1 | 50.4106 | 0 | 15.6214 | Up | 0         | 0         |
| Unigene87427 | Potri.004G187400.1 | 50.0475 | 0 | 15.611  | Up | 1.29E-121 | 3.55E-120 |
| Unigene76859 | Potri.004G187100.1 | 46.788  | 0 | 15.5139 | Up | 2.90E-82  | 4.91E-81  |
| Unigene87273 | Potri.010G221900.6 | 45.9988 | 0 | 15.4893 | Up | 8.87E-111 | 2.16E-109 |
| Unigene90017 | Potri.014G088900.1 | 45.7447 | 0 | 15.4813 | Up | 1.87E-130 | 5.59E-129 |
| Unigene92100 | Potri.017G119400.1 | 45.3333 | 0 | 15.4683 | Up | 2.13E-158 | 8.19E-157 |
| Unigene72313 | Potri.011G085100.1 | 44.9043 | 0 | 15.4546 | Up | 1.99E-71  | 2.86E-70  |
| Unigene78342 | Potri.008G051600.1 | 44.7279 | 0 | 15.4489 | Up | 2.08E-81  | 3.48E-80  |
| Unigene91507 | Potri.003G222400.2 | 43.1056 | 0 | 15.3956 | Up | 1.96E-140 | 6.44E-139 |
| Unigene79461 | Potri.016G100500.6 | 40.3822 | 0 | 15.3014 | Up | 2.03E-75  | 3.10E-74  |
| Unigene83966 | Potri.014G116800.3 | 40.0221 | 0 | 15.2885 | Up | 1.52E-84  | 2.65E-83  |
| Unigene85646 | Potri.008G112700.4 | 39.094  | 0 | 15.2547 | Up | 1.11E-87  | 2.02E-86  |
| Unigene90560 | Potri.010G082000.1 | 38.2659 | 0 | 15.2238 | Up | 1.25E-113 | 3.14E-112 |
| Unigene70770 | Potri.003G165400.1 | 37.4851 | 0 | 15.194  | Up | 2.60E-58  | 3.00E-57  |
| Unigene85348 | Potri.011G030300.1 | 37.0405 | 0 | 15.1768 | Up | 2.90E-82  | 4.91E-81  |
| Unigene84376 | Potri.004G078100.1 | 36.6287 | 0 | 15.1607 | Up | 1.48E-78  | 2.37E-77  |
| Unigene71466 | Potri.003G055800.3 | 36.5646 | 0 | 15.1582 | Up | 1.87E-57  | 2.12E-56  |
| Unigene77004 | Potri.004G224400.3 | 36.3223 | 0 | 15.1486 | Up | 2.68E-64  | 3.43E-63  |
| Unigene93917 | Potri.018G023300.2 | 36.3122 | 0 | 15.1482 | Up | 1.76E-189 | 8.62E-188 |
| Unigene90973 | Potri.008G087400.1 | 35.3462 | 0 | 15.1093 | Up | 4.56E-109 | 1.09E-107 |
| Unigene90356 | Potri.001G182100.1 | 32.8825 | 0 | 15.005  | Up | 3.09E-96  | 6.30E-95  |
| Unigene90139 | Potri.001G254600.3 | 32.0138 | 0 | 14.9664 | Up | 3.04E-92  | 5.86E-91  |
| Unigene93210 | Potri.014G040600.1 | 31.4928 | 0 | 14.9427 | Up | 3.65E-132 | 1.11E-130 |
| Unigene92488 | Potri.006G224000.2 | 31.4836 | 0 | 14.9423 | Up | 1.76E-116 | 4.56E-115 |

|              |                    |         |   |         |    |           |           |
|--------------|--------------------|---------|---|---------|----|-----------|-----------|
| Unigene94355 | Potri.010G082000.2 | 31.3236 | 0 | 14.935  | Up | 2.06E-223 | 1.22E-221 |
| Unigene92858 | Potri.015G005800.1 | 30.8761 | 0 | 14.9142 | Up | 2.50E-121 | 6.83E-120 |
| Unigene81861 | Potri.003G173900.2 | 30.7685 | 0 | 14.9092 | Up | 3.66E-61  | 4.45E-60  |
| Unigene90797 | Potri.003G222400.2 | 30.5781 | 0 | 14.9002 | Up | 8.17E-93  | 1.59E-91  |
| Unigene90391 | Potri.017G096900.1 | 30.5445 | 0 | 14.8986 | Up | 1.12E-89  | 2.09E-88  |
| Unigene71240 | Potri.008G005900.3 | 30.2828 | 0 | 14.8862 | Up | 1.78E-47  | 1.65E-46  |
| Unigene86716 | Potri.001G108100.1 | 29.8396 | 0 | 14.8649 | Up | 2.75E-70  | 3.88E-69  |
| Unigene88686 | Potri.003G158200.1 | 29.6851 | 0 | 14.8575 | Up | 2.04E-77  | 3.23E-76  |
| Unigene80535 | Potri.014G164900.6 | 29.5101 | 0 | 14.8489 | Up | 6.94E-57  | 7.79E-56  |
| Unigene78578 | Potri.008G079000.1 | 29.4304 | 0 | 14.845  | Up | 4.93E-54  | 5.22E-53  |
| Unigene91547 | Potri.019G081000.1 | 29.3318 | 0 | 14.8402 | Up | 3.09E-96  | 6.30E-95  |
| Unigene84137 | Potri.004G171000.1 | 28.5152 | 0 | 14.7994 | Up | 7.07E-61  | 8.53E-60  |
| Unigene80473 | Potri.003G223200.4 | 28.2755 | 0 | 14.7873 | Up | 2.56E-54  | 2.72E-53  |
| Unigene92716 | Potri.018G063000.2 | 28.1435 | 0 | 14.7805 | Up | 1.22E-107 | 2.84E-106 |
| Unigene81694 | Potri.013G096600.3 | 28.1204 | 0 | 14.7793 | Up | 9.59E-56  | 1.05E-54  |
| Unigene71150 | Potri.004G086900.1 | 27.8823 | 0 | 14.7671 | Up | 9.08E-44  | 7.76E-43  |
| Unigene87782 | Potri.009G111500.1 | 27.7713 | 0 | 14.7613 | Up | 7.33E-69  | 1.01E-67  |
| Unigene86660 | Potri.T111000.1    | 26.9931 | 0 | 14.7203 | Up | 1.92E-63  | 2.42E-62  |
| Unigene94002 | Potri.002G032700.1 | 26.8452 | 0 | 14.7124 | Up | 2.01E-146 | 7.00E-145 |
| Unigene86071 | Potri.002G094100.2 | 26.6246 | 0 | 14.7005 | Up | 3.66E-61  | 4.44E-60  |
| Unigene89842 | Potri.011G031600.2 | 26.4969 | 0 | 14.6935 | Up | 7.53E-75  | 1.14E-73  |
| Unigene89023 | Potri.014G145700.1 | 26.3037 | 0 | 14.683  | Up | 2.75E-70  | 3.88E-69  |
| Unigene91882 | Potri.016G006000.3 | 26.0171 | 0 | 14.6672 | Up | 8.03E-89  | 1.48E-87  |
| Unigene81755 | Potri.016G126300.1 | 25.2063 | 0 | 14.6215 | Up | 4.84E-50  | 4.73E-49  |
| Unigene75795 | Potri.010G187700.4 | 24.5876 | 0 | 14.5856 | Up | 1.26E-42  | 1.05E-41  |
| Unigene92661 | Potri.003G145100.1 | 24.3882 | 0 | 14.5739 | Up | 8.17E-93  | 1.59E-91  |
| Unigene88387 | Potri.006G262700.2 | 23.7054 | 0 | 14.5329 | Up | 7.07E-61  | 8.53E-60  |
| Unigene90691 | Potri.001G057800.1 | 23.5274 | 0 | 14.5221 | Up | 7.40E-71  | 1.05E-69  |
| Unigene89008 | Potri.002G102600.1 | 23.5009 | 0 | 14.5204 | Up | 7.13E-63  | 8.91E-62  |
| Unigene86702 | Potri.011G129800.1 | 22.9912 | 0 | 14.4888 | Up | 2.56E-54  | 2.72E-53  |
| Unigene90465 | Potri.010G163800.1 | 22.9835 | 0 | 14.4883 | Up | 5.25E-68  | 7.16E-67  |
| Unigene93588 | Potri.005G160200.1 | 22.8251 | 0 | 14.4783 | Up | 6.24E-106 | 1.43E-104 |
| Unigene93649 | Potri.002G049200.2 | 22.8043 | 0 | 14.477  | Up | 6.30E-108 | 1.48E-106 |
| Unigene93726 | Potri.012G099200.1 | 22.6758 | 0 | 14.4689 | Up | 6.36E-110 | 1.53E-108 |
| Unigene81926 | Potri.012G099200.1 | 22.3507 | 0 | 14.448  | Up | 1.27E-44  | 1.10E-43  |
| Unigene82423 | Potri.003G165400.1 | 22.294  | 0 | 14.4444 | Up | 3.41E-45  | 3.00E-44  |
| Unigene93097 | Potri.002G032700.1 | 22.2538 | 0 | 14.4418 | Up | 2.18E-91  | 4.15E-90  |
| Unigene94209 | Potri.008G051600.1 | 22.221  | 0 | 14.4396 | Up | 1.93E-136 | 6.09E-135 |

|              |                    |         |   |         |    |           |           |
|--------------|--------------------|---------|---|---------|----|-----------|-----------|
| Unigene92814 | Potri.004G129800.1 | 22.1443 | 0 | 14.4346 | Up | 1.53E-86  | 2.75E-85  |
| Unigene71815 | Potri.013G093800.1 | 22.1238 | 0 | 14.4333 | Up | 3.26E-35  | 2.27E-34  |
| Unigene90068 | Potri.001G289700.1 | 21.9586 | 0 | 14.4225 | Up | 3.70E-63  | 4.65E-62  |
| Unigene73245 | Potri.007G072700.1 | 21.8469 | 0 | 14.4151 | Up | 8.76E-36  | 6.20E-35  |
| Unigene70614 | Potri.006G194400.1 | 21.8202 | 0 | 14.4134 | Up | 4.50E-34  | 3.05E-33  |
| Unigene94246 | Potri.006G262700.2 | 21.6446 | 0 | 14.4017 | Up | 9.98E-137 | 3.17E-135 |
| Unigene91440 | Potri.004G172500.1 | 21.6178 | 0 | 14.3999 | Up | 2.75E-70  | 3.88E-69  |
| Unigene91840 | Potri.016G061900.1 | 21.519  | 0 | 14.3933 | Up | 2.01E-73  | 2.98E-72  |
| Unigene83949 | Potri.001G013300.1 | 21.2362 | 0 | 14.3742 | Up | 3.41E-45  | 3.00E-44  |
| Unigene79716 | Potri.016G101700.1 | 21.0956 | 0 | 14.3647 | Up | 4.63E-40  | 3.63E-39  |
| Unigene84529 | Potri.001G151800.2 | 20.8557 | 0 | 14.3482 | Up | 3.41E-45  | 3.00E-44  |
| Unigene78101 | Potri.010G221900.7 | 20.7925 | 0 | 14.3438 | Up | 4.58E-38  | 3.43E-37  |
| Unigene79384 | Potri.014G123000.1 | 20.6535 | 0 | 14.3341 | Up | 6.39E-39  | 4.89E-38  |
| Unigene84612 | Potri.004G041600.1 | 20.648  | 0 | 14.3337 | Up | 6.57E-45  | 5.75E-44  |
| Unigene84580 | Potri.008G112700.1 | 20.3815 | 0 | 14.315  | Up | 2.44E-44  | 2.11E-43  |
| Unigene73157 | Potri.005G235200.4 | 20.0707 | 0 | 14.2928 | Up | 6.22E-33  | 4.10E-32  |
| Unigene84752 | Potri.008G112800.1 | 20.0435 | 0 | 14.2908 | Up | 9.08E-44  | 7.76E-43  |
| Unigene89688 | Potri.014G067400.1 | 19.9413 | 0 | 14.2835 | Up | 9.59E-56  | 1.05E-54  |
| Unigene93437 | Potri.007G098300.1 | 19.8457 | 0 | 14.2765 | Up | 2.98E-88  | 5.46E-87  |
| Unigene82995 | Potri.010G163800.1 | 19.6313 | 0 | 14.2609 | Up | 1.24E-40  | 9.90E-40  |
| Unigene92952 | Potri.008G194900.1 | 19.5823 | 0 | 14.2573 | Up | 1.48E-78  | 2.37E-77  |
| Unigene93686 | Potri.017G130700.2 | 19.5808 | 0 | 14.2572 | Up | 1.14E-93  | 2.24E-92  |
| Unigene79836 | Potri.001G186800.3 | 19.567  | 0 | 14.2561 | Up | 3.29E-37  | 2.41E-36  |
| Unigene84034 | Potri.006G250900.1 | 19.3958 | 0 | 14.2435 | Up | 1.74E-41  | 1.41E-40  |
| Unigene87207 | Potri.007G122700.1 | 19.3671 | 0 | 14.2413 | Up | 6.63E-47  | 6.07E-46  |
| Unigene79227 | Potri.010G088600.1 | 19.3462 | 0 | 14.2398 | Up | 2.36E-36  | 1.69E-35  |
| Unigene73055 | Potri.010G187700.3 | 19.0959 | 0 | 14.221  | Up | 3.20E-31  | 2.01E-30  |
| Unigene92782 | Potri.001G060300.1 | 19.0198 | 0 | 14.2152 | Up | 5.40E-74  | 8.07E-73  |
| Unigene91622 | Potri.004G172500.1 | 18.91   | 0 | 14.2069 | Up | 7.13E-63  | 8.91E-62  |
| Unigene77099 | Potri.014G194500.1 | 18.8941 | 0 | 14.2056 | Up | 8.68E-34  | 5.83E-33  |
| Unigene75002 | Potri.001G148800.1 | 18.6498 | 0 | 14.1869 | Up | 8.60E-32  | 5.49E-31  |
| Unigene91640 | Potri.009G054200.2 | 18.3469 | 0 | 14.1632 | Up | 3.66E-61  | 4.44E-60  |
| Unigene77162 | Potri.002G113000.3 | 18.1633 | 0 | 14.1487 | Up | 1.20E-32  | 7.84E-32  |
| Unigene88871 | Potri.013G105300.4 | 18.1045 | 0 | 14.1441 | Up | 4.80E-48  | 4.50E-47  |
| Unigene85126 | Potri.012G079700.4 | 18.0608 | 0 | 14.1406 | Up | 4.63E-40  | 3.63E-39  |
| Unigene72927 | Potri.016G101700.1 | 18.0251 | 0 | 14.1377 | Up | 1.64E-29  | 9.84E-29  |
| Unigene83481 | Potri.001G054400.1 | 17.959  | 0 | 14.1324 | Up | 8.84E-38  | 6.57E-37  |
| Unigene80728 | Potri.014G138300.1 | 17.9038 | 0 | 14.128  | Up | 6.28E-35  | 4.34E-34  |

|              |                    |         |   |         |    |           |           |
|--------------|--------------------|---------|---|---------|----|-----------|-----------|
| Unigene93189 | Potri.008G038000.1 | 17.8956 | 0 | 14.1273 | Up | 3.91E-75  | 5.95E-74  |
| Unigene94191 | Potri.003G109100.1 | 17.7999 | 0 | 14.1196 | Up | 3.27E-108 | 7.70E-107 |
| Unigene88009 | Potri.013G045100.1 | 17.62   | 0 | 14.1049 | Up | 1.27E-44  | 1.10E-43  |
| Unigene88916 | Potri.007G098300.1 | 17.4571 | 0 | 14.0915 | Up | 1.28E-46  | 1.16E-45  |
| Unigene94296 | Potri.010G214200.1 | 17.3425 | 0 | 14.082  | Up | 3.36E-114 | 8.49E-113 |
| Unigene92913 | Potri.019G117600.1 | 17.3151 | 0 | 14.0797 | Up | 3.80E-69  | 5.27E-68  |
| Unigene90861 | Potri.010G000900.1 | 17.2874 | 0 | 14.0774 | Up | 3.53E-53  | 3.68E-52  |
| Unigene75826 | Potri.004G160700.1 | 17.228  | 0 | 14.0725 | Up | 4.42E-30  | 2.69E-29  |
| Unigene91780 | Potri.010G082000.1 | 17.2021 | 0 | 14.0703 | Up | 2.60E-58  | 3.00E-57  |
| Unigene93452 | Potri.010G064800.1 | 17.1655 | 0 | 14.0672 | Up | 1.47E-76  | 2.29E-75  |
| Unigene93655 | Potri.T101600.1    | 17.1639 | 0 | 14.0671 | Up | 2.08E-81  | 3.48E-80  |
| Unigene79791 | Potri.010G221900.8 | 17.1211 | 0 | 14.0635 | Up | 1.20E-32  | 7.84E-32  |
| Unigene92022 | Potri.014G024500.2 | 17.1197 | 0 | 14.0634 | Up | 9.77E-60  | 1.16E-58  |
| Unigene92728 | Potri.005G197000.3 | 16.9679 | 0 | 14.0505 | Up | 1.94E-65  | 2.53E-64  |
| Unigene83001 | Potri.009G079700.1 | 16.8269 | 0 | 14.0385 | Up | 6.28E-35  | 4.34E-34  |
| Unigene90587 | Potri.006G233900.1 | 16.7703 | 0 | 14.0336 | Up | 2.51E-50  | 2.47E-49  |
| Unigene81676 | Potri.003G142700.2 | 16.7557 | 0 | 14.0324 | Up | 1.67E-33  | 1.12E-32  |
| Unigene93635 | Potri.009G096300.1 | 16.6047 | 0 | 14.0193 | Up | 2.85E-78  | 4.56E-77  |
| Unigene70383 | Potri.004G082100.2 | 16.5479 | 0 | 14.0144 | Up | 1.29E-265 | 9.68E-264 |
| Unigene79437 | Potri.008G063200.1 | 16.4919 | 0 | 14.0095 | Up | 3.20E-31  | 2.01E-30  |
| Unigene86597 | Potri.011G061200.3 | 16.4412 | 0 | 14.005  | Up | 6.39E-39  | 4.89E-38  |
| Unigene86459 | Potri.010G148100.3 | 16.4266 | 0 | 14.0037 | Up | 1.23E-38  | 9.36E-38  |
| Unigene85448 | Potri.001G408300.1 | 16.3912 | 0 | 14.0006 | Up | 6.34E-37  | 4.62E-36  |
| Unigene85996 | Potri.002G113000.3 | 16.3816 | 0 | 13.9998 | Up | 8.84E-38  | 6.57E-37  |
| Unigene83604 | Potri.001G249200.8 | 16.3788 | 0 | 13.9995 | Up | 1.21E-34  | 8.31E-34  |
| Unigene91603 | Potri.011G085000.1 | 16.3457 | 0 | 13.9966 | Up | 2.56E-54  | 2.72E-53  |
| Unigene78537 | Potri.006G248100.2 | 16.2104 | 0 | 13.9846 | Up | 4.42E-30  | 2.69E-29  |
| Unigene91142 | Potri.017G047700.1 | 16.1295 | 0 | 13.9774 | Up | 6.75E-51  | 6.72E-50  |
| Unigene88876 | Potri.008G002500.3 | 16.0943 | 0 | 13.9743 | Up | 6.51E-43  | 5.46E-42  |
| Unigene90982 | Potri.012G134000.1 | 16.0918 | 0 | 13.974  | Up | 4.84E-50  | 4.73E-49  |
| Unigene92971 | Potri.006G119100.1 | 15.9345 | 0 | 13.9599 | Up | 2.68E-64  | 3.43E-63  |
| Unigene74898 | Potri.010G254900.6 | 15.9122 | 0 | 13.9578 | Up | 3.14E-27  | 1.76E-26  |
| Unigene71615 | Potri.007G065500.4 | 15.9072 | 0 | 13.9574 | Up | 1.61E-25  | 8.58E-25  |
| Unigene82622 | Potri.013G045100.1 | 15.8842 | 0 | 13.9553 | Up | 1.20E-32  | 7.84E-32  |
| Unigene93865 | Potri.004G172500.1 | 15.6072 | 0 | 13.9299 | Up | 1.07E-79  | 1.75E-78  |
| Unigene70414 | Potri.001G054300.1 | 15.5748 | 0 | 13.9269 | Up | 1.60E-167 | 6.63E-166 |
| Unigene87637 | Potri.005G160200.1 | 15.5512 | 0 | 13.9247 | Up | 1.23E-38  | 9.36E-38  |
| Unigene76542 | Potri.006G022100.3 | 15.514  | 0 | 13.9213 | Up | 1.63E-27  | 9.20E-27  |



|              |                    |         |   |         |    |          |          |
|--------------|--------------------|---------|---|---------|----|----------|----------|
| Unigene84646 | Potri.003G170000.4 | 15.4527 | 0 | 13.9156 | Up | 8.68E-34 | 5.83E-33 |
| Unigene89914 | Potri.017G119400.1 | 15.4063 | 0 | 13.9112 | Up | 4.71E-44 | 4.04E-43 |
| Unigene71484 | Potri.016G078100.4 | 15.2506 | 0 | 13.8966 | Up | 2.23E-24 | 1.15E-23 |
| Unigene93117 | Potri.004G187200.1 | 15.2399 | 0 | 13.8956 | Up | 3.70E-63 | 4.65E-62 |
| Unigene93269 | Potri.008G087400.1 | 15.1761 | 0 | 13.8895 | Up | 7.20E-65 | 9.32E-64 |
| Unigene80931 | Potri.004G086900.1 | 15.1576 | 0 | 13.8878 | Up | 8.52E-30 | 5.14E-29 |
| Unigene89318 | Potri.003G109100.1 | 15.11   | 0 | 13.8832 | Up | 1.74E-41 | 1.41E-40 |
| Unigene77349 | Potri.004G211600.1 | 15.0167 | 0 | 13.8743 | Up | 3.14E-27 | 1.76E-26 |
| Unigene91636 | Potri.T165000.1    | 14.9717 | 0 | 13.87   | Up | 4.84E-50 | 4.73E-49 |
| Unigene90488 | Potri.001G118900.1 | 14.9587 | 0 | 13.8687 | Up | 1.27E-44 | 1.10E-43 |
| Unigene88738 | Potri.016G071300.1 | 14.9198 | 0 | 13.8649 | Up | 1.72E-39 | 1.33E-38 |
| Unigene80708 | Potri.012G079700.5 | 14.9198 | 0 | 13.8649 | Up | 3.17E-29 | 1.88E-28 |
| Unigene79724 | Potri.014G153400.1 | 14.8281 | 0 | 13.856  | Up | 2.27E-28 | 1.32E-27 |
| Unigene91447 | Potri.018G083200.1 | 14.7958 | 0 | 13.8529 | Up | 2.49E-48 | 2.35E-47 |
| Unigene86449 | Potri.005G172100.2 | 14.7463 | 0 | 13.8481 | Up | 1.21E-34 | 8.31E-34 |
| Unigene84301 | Potri.001G298900.1 | 14.6774 | 0 | 13.8413 | Up | 8.60E-32 | 5.49E-31 |
| Unigene79124 | Potri.004G082100.3 | 14.609  | 0 | 13.8346 | Up | 1.63E-27 | 9.20E-27 |
| Unigene77794 | Potri.017G073100.1 | 14.5676 | 0 | 13.8305 | Up | 1.17E-26 | 6.43E-26 |
| Unigene93948 | Potri.001G110700.1 | 14.5414 | 0 | 13.8279 | Up | 2.04E-77 | 3.23E-76 |
| Unigene87834 | Potri.009G054000.1 | 14.4796 | 0 | 13.8217 | Up | 2.36E-36 | 1.69E-35 |
| Unigene89170 | Potri.018G083200.1 | 14.4282 | 0 | 13.8166 | Up | 3.32E-39 | 2.55E-38 |
| Unigene90620 | Potri.010G118800.1 | 14.4199 | 0 | 13.8158 | Up | 1.75E-43 | 1.49E-42 |
| Unigene94288 | Potri.013G096600.3 | 14.4102 | 0 | 13.8148 | Up | 3.07E-94 | 6.07E-93 |
| Unigene84909 | Potri.004G148300.1 | 14.3663 | 0 | 13.8104 | Up | 8.60E-32 | 5.49E-31 |
| Unigene84311 | Potri.013G018000.1 | 14.2735 | 0 | 13.8011 | Up | 6.17E-31 | 3.84E-30 |
| Unigene89529 | Potri.006G104200.1 | 14.1697 | 0 | 13.7905 | Up | 1.72E-39 | 1.33E-38 |
| Unigene88766 | Potri.010G060200.1 | 14.1519 | 0 | 13.7887 | Up | 1.70E-37 | 1.26E-36 |
| Unigene71394 | Potri.001G002500.2 | 14.1481 | 0 | 13.7883 | Up | 1.15E-22 | 5.56E-22 |
| Unigene85290 | Potri.008G172600.1 | 14.0361 | 0 | 13.7769 | Up | 1.66E-31 | 1.05E-30 |
| Unigene88214 | Potri.001G087500.3 | 13.9448 | 0 | 13.7674 | Up | 8.76E-36 | 6.20E-35 |
| Unigene93205 | Potri.002G117900.1 | 13.8248 | 0 | 13.755  | Up | 2.60E-58 | 3.00E-57 |
| Unigene91405 | Potri.015G076500.2 | 13.7982 | 0 | 13.7522 | Up | 6.57E-45 | 5.75E-44 |
| Unigene88088 | Potri.001G393900.1 | 13.4598 | 0 | 13.7164 | Up | 2.33E-34 | 1.59E-33 |
| Unigene89244 | Potri.009G081600.8 | 13.3896 | 0 | 13.7088 | Up | 1.22E-36 | 8.84E-36 |
| Unigene78488 | Potri.001G372500.1 | 13.3775 | 0 | 13.7075 | Up | 6.00E-25 | 3.14E-24 |
| Unigene63556 | Potri.006G095200.1 | 13.3143 | 0 | 13.7007 | Up | 1.72E-39 | 1.33E-38 |
| Unigene84348 | Potri.018G126400.2 | 13.2829 | 0 | 13.6973 | Up | 6.11E-29 | 3.60E-28 |
| Unigene56555 | Potri.002G102600.1 | 13.2296 | 0 | 13.6915 | Up | 5.70E-86 | 1.02E-84 |

|              |                    |         |   |         |    |           |           |
|--------------|--------------------|---------|---|---------|----|-----------|-----------|
| Unigene94055 | Potri.003G026000.1 | 13.2188 | 0 | 13.6903 | Up | 2.80E-74  | 4.20E-73  |
| Unigene88372 | Potri.018G098000.1 | 13.1447 | 0 | 13.6822 | Up | 4.50E-34  | 3.04E-33  |
| Unigene65194 | Potri.006G226800.3 | 13.1354 | 0 | 13.6812 | Up | 6.17E-31  | 3.84E-30  |
| Unigene94501 | Potri.008G030500.1 | 13.0904 | 0 | 13.6762 | Up | 1.57E-163 | 6.31E-162 |
| Unigene72159 | Potri.018G046300.1 | 13.0367 | 0 | 13.6703 | Up | 3.06E-21  | 1.42E-20  |
| Unigene64097 | Potri.014G153400.2 | 13.0202 | 0 | 13.6685 | Up | 9.77E-60  | 1.16E-58  |
| Unigene68492 | Potri.005G185900.1 | 12.9882 | 0 | 13.6649 | Up | 1.48E-78  | 2.38E-77  |
| Unigene90515 | Potri.009G131900.2 | 12.9822 | 0 | 13.6642 | Up | 6.39E-39  | 4.89E-38  |
| Unigene66017 | Potri.006G104300.1 | 12.9668 | 0 | 13.6625 | Up | 6.63E-47  | 6.07E-46  |
| Unigene71882 | Potri.008G087400.1 | 12.9184 | 0 | 13.6571 | Up | 5.89E-21  | 2.71E-20  |
| Unigene63569 | Potri.008G087400.1 | 12.8217 | 0 | 13.6463 | Up | 4.46E-32  | 2.87E-31  |
| Unigene83301 | Potri.003G165400.1 | 12.8043 | 0 | 13.6443 | Up | 6.05E-27  | 3.36E-26  |
| Unigene92896 | Potri.003G167600.1 | 12.6746 | 0 | 13.6297 | Up | 1.30E-50  | 1.29E-49  |
| Unigene93093 | Potri.002G027300.4 | 12.5729 | 0 | 13.618  | Up | 4.89E-52  | 4.98E-51  |
| Unigene88112 | Potri.017G135500.1 | 12.5472 | 0 | 13.6151 | Up | 4.46E-32  | 2.87E-31  |
| Unigene74650 | Potri.009G093500.3 | 12.5478 | 0 | 13.6151 | Up | 1.58E-21  | 7.42E-21  |
| Unigene61983 | Potri.004G135100.1 | 12.5198 | 0 | 13.6119 | Up | 7.70E-152 | 2.80E-150 |
| Unigene77754 | Potri.018G114500.6 | 12.4865 | 0 | 13.6081 | Up | 5.95E-23  | 2.92E-22  |
| Unigene92249 | Potri.003G148200.2 | 12.3796 | 0 | 13.5957 | Up | 1.27E-44  | 1.10E-43  |
| Unigene67334 | Potri.006G014000.2 | 12.2306 | 0 | 13.5782 | Up | 1.28E-46  | 1.16E-45  |
| Unigene54301 | Potri.011G039800.3 | 12.1903 | 0 | 13.5734 | Up | 2.77E-72  | 4.04E-71  |
| Unigene62923 | Potri.014G064900.1 | 12.1731 | 0 | 13.5714 | Up | 5.95E-23  | 2.92E-22  |
| Unigene70275 | Potri.002G090000.4 | 12.1427 | 0 | 13.5678 | Up | 2.63E-60  | 3.14E-59  |
| Unigene84613 | Potri.002G127100.3 | 12.1224 | 0 | 13.5654 | Up | 1.17E-26  | 6.43E-26  |
| Unigene68449 | Potri.005G257800.3 | 12.1055 | 0 | 13.5634 | Up | 1.95E-67  | 2.64E-66  |
| Unigene72437 | Potri.014G016800.3 | 11.8926 | 0 | 13.5378 | Up | 1.57E-19  | 6.87E-19  |
| Unigene93897 | Potri.001G469100.1 | 11.8781 | 0 | 13.536  | Up | 9.86E-62  | 1.21E-60  |
| Unigene70767 | Potri.009G059100.1 | 11.8765 | 0 | 13.5358 | Up | 5.84E-19  | 2.50E-18  |
| Unigene65740 | Potri.016G061900.1 | 11.8485 | 0 | 13.5324 | Up | 8.55E-103 | 1.89E-101 |
| Unigene87684 | Potri.003G192200.1 | 11.7727 | 0 | 13.5232 | Up | 1.64E-29  | 9.84E-29  |
| Unigene85910 | Potri.017G099900.2 | 11.7588 | 0 | 13.5215 | Up | 3.14E-27  | 1.76E-26  |
| Unigene70336 | Potri.009G027700.1 | 11.7227 | 0 | 13.517  | Up | 1.40E-66  | 1.87E-65  |
| Unigene87180 | Potri.014G120700.1 | 11.7159 | 0 | 13.5162 | Up | 1.18E-28  | 6.88E-28  |
| Unigene92018 | Potri.001G408300.1 | 11.6613 | 0 | 13.5094 | Up | 6.45E-41  | 5.17E-40  |
| Unigene91801 | Potri.001G194000.1 | 11.5552 | 0 | 13.4963 | Up | 1.72E-39  | 1.33E-38  |
| Unigene84355 | Potri.010G063900.1 | 11.5387 | 0 | 13.4942 | Up | 3.11E-25  | 1.64E-24  |
| Unigene87143 | Potri.003G006300.2 | 11.5137 | 0 | 13.4911 | Up | 4.38E-28  | 2.52E-27  |
| Unigene76062 | Potri.014G016800.5 | 11.4896 | 0 | 13.488  | Up | 2.19E-20  | 9.88E-20  |

|              |                    |         |   |         |    |           |           |
|--------------|--------------------|---------|---|---------|----|-----------|-----------|
| Unigene79760 | Potri.006G233200.1 | 11.465  | 0 | 13.4849 | Up | 4.26E-22  | 2.03E-21  |
| Unigene72095 | Potri.001G406100.1 | 11.4628 | 0 | 13.4847 | Up | 1.13E-18  | 4.77E-18  |
| Unigene91146 | Potri.017G138900.5 | 11.4556 | 0 | 13.4838 | Up | 2.36E-36  | 1.69E-35  |
| Unigene74314 | Potri.006G128600.5 | 11.4501 | 0 | 13.4831 | Up | 1.57E-19  | 6.87E-19  |
| Unigene88270 | Potri.006G010700.2 | 11.3029 | 0 | 13.4644 | Up | 3.17E-29  | 1.88E-28  |
| Unigene74278 | Potri.001G400800.1 | 11.2766 | 0 | 13.461  | Up | 3.03E-19  | 1.31E-18  |
| Unigene93639 | Potri.015G024300.1 | 11.2752 | 0 | 13.4609 | Up | 1.83E-53  | 1.92E-52  |
| Unigene73676 | Potri.019G083900.1 | 11.2602 | 0 | 13.4589 | Up | 5.84E-19  | 2.50E-18  |
| Unigene73650 | Potri.019G018900.4 | 11.2602 | 0 | 13.4589 | Up | 5.84E-19  | 2.50E-18  |
| Unigene92726 | Potri.006G064100.1 | 11.2123 | 0 | 13.4528 | Up | 1.75E-43  | 1.49E-42  |
| Unigene93630 | Potri.006G248900.1 | 11.1716 | 0 | 13.4475 | Up | 6.81E-53  | 7.06E-52  |
| Unigene93009 | Potri.003G158300.1 | 11.1543 | 0 | 13.4453 | Up | 1.77E-45  | 1.57E-44  |
| Unigene75460 | Potri.008G160100.1 | 11.1392 | 0 | 13.4434 | Up | 1.57E-19  | 6.87E-19  |
| Unigene70985 | Potri.011G165600.1 | 11.1342 | 0 | 13.4427 | Up | 8.07E-18  | 3.31E-17  |
| Unigene92277 | Potri.016G126600.1 | 11.0458 | 0 | 13.4312 | Up | 4.63E-40  | 3.63E-39  |
| Unigene61629 | Potri.019G031300.1 | 10.9839 | 0 | 13.4231 | Up | 9.00E-42  | 7.36E-41  |
| Unigene92601 | Potri.012G038800.2 | 10.9839 | 0 | 13.4231 | Up | 9.00E-42  | 7.36E-41  |
| Unigene66446 | Potri.008G134800.1 | 10.9646 | 0 | 13.4206 | Up | 3.70E-63  | 4.65E-62  |
| Unigene93930 | Potri.002G146100.1 | 10.9608 | 0 | 13.4201 | Up | 5.02E-58  | 5.75E-57  |
| Unigene63701 | Potri.001G098900.1 | 10.9388 | 0 | 13.4172 | Up | 1.81E-122 | 4.99E-121 |
| Unigene81327 | Potri.009G027500.2 | 10.8668 | 0 | 13.4076 | Up | 8.22E-22  | 3.88E-21  |
| Unigene70440 | Potri.002G032700.1 | 10.8169 | 0 | 13.401  | Up | 3.00E-17  | 1.20E-16  |
| Unigene67042 | Potri.004G131700.1 | 10.7828 | 0 | 13.3964 | Up | 1.52E-84  | 2.66E-83  |
| Unigene56020 | Potri.013G118200.1 | 10.7678 | 0 | 13.3944 | Up | 2.36E-36  | 1.69E-35  |
| Unigene83223 | Potri.008G051600.1 | 10.7568 | 0 | 13.393  | Up | 1.15E-22  | 5.56E-22  |
| Unigene89689 | Potri.003G109300.1 | 10.7456 | 0 | 13.3915 | Up | 2.29E-30  | 1.41E-29  |
| Unigene86220 | Potri.005G033700.2 | 10.7283 | 0 | 13.3891 | Up | 3.11E-25  | 1.64E-24  |
| Unigene68088 | Potri.012G134000.1 | 10.6824 | 0 | 13.3829 | Up | 6.28E-35  | 4.34E-34  |
| Unigene87432 | Potri.019G100000.1 | 10.6233 | 0 | 13.3749 | Up | 2.25E-26  | 1.23E-25  |
| Unigene87541 | Potri.004G133800.1 | 10.5898 | 0 | 13.3704 | Up | 2.25E-26  | 1.23E-25  |
| Unigene56968 | Potri.008G087100.3 | 10.5814 | 0 | 13.3692 | Up | 2.47E-46  | 2.23E-45  |
| Unigene72023 | Potri.015G005800.1 | 10.553  | 0 | 13.3654 | Up | 3.00E-17  | 1.20E-16  |
| Unigene93654 | Potri.010G163500.1 | 10.4924 | 0 | 13.3571 | Up | 4.84E-50  | 4.73E-49  |
| Unigene71013 | Potri.004G229400.1 | 10.3919 | 0 | 13.3432 | Up | 1.12E-16  | 4.37E-16  |
| Unigene58002 | Potri.005G240700.1 | 10.3476 | 0 | 13.337  | Up | 3.11E-25  | 1.64E-24  |
| Unigene78671 | Potri.019G059000.1 | 10.3436 | 0 | 13.3365 | Up | 1.57E-19  | 6.87E-19  |
| Unigene55690 | Potri.001G289700.1 | 10.3082 | 0 | 13.3315 | Up | 2.21E-22  | 1.06E-21  |
| Unigene80840 | Potri.001G137000.1 | 10.2537 | 0 | 13.3239 | Up | 2.19E-20  | 9.88E-20  |

|              |                    |         |   |         |    |           |           |
|--------------|--------------------|---------|---|---------|----|-----------|-----------|
| Unigene80707 | Potri.001G155900.3 | 10.1455 | 0 | 13.3086 | Up | 4.22E-20  | 1.89E-19  |
| Unigene70410 | Potri.005G181700.1 | 10.1033 | 0 | 13.3025 | Up | 2.18E-91  | 4.15E-90  |
| Unigene65633 | Potri.006G128600.5 | 10.0765 | 0 | 13.2987 | Up | 1.11E-87  | 2.02E-86  |
| Unigene91070 | Potri.002G231900.1 | 10.0386 | 0 | 13.2933 | Up | 8.60E-32  | 5.49E-31  |
| Unigene54166 | Potri.005G194300.1 | 10.0349 | 0 | 13.2927 | Up | 2.83E-76  | 4.39E-75  |
| Unigene70379 | Potri.006G251000.1 | 10.0168 | 0 | 13.2901 | Up | 1.00E-65  | 1.32E-64  |
| Unigene84554 | Potri.008G034500.1 | 9.991   | 0 | 13.2864 | Up | 4.26E-22  | 2.03E-21  |
| Unigene91560 | Potri.011G085000.1 | 9.9816  | 0 | 13.2851 | Up | 3.23E-33  | 2.14E-32  |
| Unigene88019 | Potri.005G259900.1 | 9.9542  | 0 | 13.2811 | Up | 1.61E-25  | 8.57E-25  |
| Unigene83984 | Potri.017G013500.1 | 9.9375  | 0 | 13.2787 | Up | 1.58E-21  | 7.42E-21  |
| Unigene87928 | Potri.008G062300.1 | 9.9005  | 0 | 13.2733 | Up | 3.11E-25  | 1.64E-24  |
| Unigene66609 | Potri.002G185500.1 | 9.8932  | 0 | 13.2722 | Up | 8.03E-89  | 1.48E-87  |
| Unigene70404 | Potri.010G250700.1 | 9.8724  | 0 | 13.2692 | Up | 3.98E-79  | 6.45E-78  |
| Unigene62016 | Potri.002G256500.1 | 9.8608  | 0 | 13.2675 | Up | 1.20E-105 | 2.75E-104 |
| Unigene70961 | Potri.003G222400.2 | 9.8352  | 0 | 13.2637 | Up | 8.00E-16  | 3.02E-15  |
| Unigene64464 | Potri.011G046400.2 | 9.8031  | 0 | 13.259  | Up | 4.30E-24  | 2.19E-23  |
| Unigene90860 | Potri.011G145900.1 | 9.7712  | 0 | 13.2543 | Up | 2.29E-30  | 1.41E-29  |
| Unigene89298 | Potri.001G400800.1 | 9.7487  | 0 | 13.251  | Up | 6.05E-27  | 3.36E-26  |
| Unigene88104 | Potri.004G052400.1 | 9.6956  | 0 | 13.2431 | Up | 6.00E-25  | 3.14E-24  |
| Unigene81970 | Potri.007G107600.1 | 9.6863  | 0 | 13.2417 | Up | 8.14E-20  | 3.60E-19  |
| Unigene82120 | Potri.001G118900.1 | 9.6489  | 0 | 13.2361 | Up | 8.14E-20  | 3.60E-19  |
| Unigene69907 | Potri.001G256500.3 | 9.6257  | 0 | 13.2327 | Up | 1.20E-32  | 7.84E-32  |
| Unigene76960 | Potri.014G164900.6 | 9.6099  | 0 | 13.2303 | Up | 1.56E-17  | 6.31E-17  |
| Unigene92828 | Potri.006G129600.1 | 9.5997  | 0 | 13.2288 | Up | 4.58E-38  | 3.43E-37  |
| Unigene58323 | Potri.010G135600.1 | 9.5752  | 0 | 13.2251 | Up | 2.44E-44  | 2.11E-43  |
| Unigene74259 | Potri.010G058700.1 | 9.5417  | 0 | 13.22   | Up | 2.15E-16  | 8.32E-16  |
| Unigene94434 | Potri.006G085500.1 | 9.5057  | 0 | 13.2146 | Up | 2.06E-79  | 3.36E-78  |
| Unigene87193 | Potri.010G148200.6 | 9.4444  | 0 | 13.2052 | Up | 3.08E-23  | 1.53E-22  |
| Unigene92571 | Potri.016G079900.4 | 9.4206  | 0 | 13.2016 | Up | 8.76E-36  | 6.20E-35  |
| Unigene76480 | Potri.010G111500.1 | 9.4074  | 0 | 13.1996 | Up | 5.79E-17  | 2.29E-16  |
| Unigene78731 | Potri.002G010100.1 | 9.4032  | 0 | 13.1989 | Up | 8.07E-18  | 3.31E-17  |
| Unigene63209 | Potri.001G400800.1 | 9.4007  | 0 | 13.1986 | Up | 3.14E-27  | 1.76E-26  |
| Unigene66216 | Potri.014G092500.4 | 9.3866  | 0 | 13.1964 | Up | 3.23E-33  | 2.14E-32  |
| Unigene64778 | Potri.012G099300.1 | 9.3699  | 0 | 13.1938 | Up | 1.54E-15  | 5.75E-15  |
| Unigene70025 | Potri.009G089700.1 | 9.3518  | 0 | 13.191  | Up | 1.82E-124 | 5.13E-123 |
| Unigene70125 | Potri.014G151200.1 | 9.2872  | 0 | 13.181  | Up | 1.55E-88  | 2.85E-87  |
| Unigene84358 | Potri.008G080800.5 | 9.2578  | 0 | 13.1765 | Up | 2.19E-20  | 9.87E-20  |
| Unigene72197 | Potri.003G173900.2 | 9.2344  | 0 | 13.1728 | Up | 2.97E-15  | 1.09E-14  |

|              |                    |        |   |         |    |          |          |
|--------------|--------------------|--------|---|---------|----|----------|----------|
| Unigene91159 | Potri.009G070500.1 | 9.2335 | 0 | 13.1727 | Up | 1.64E-29 | 9.84E-29 |
| Unigene75981 | Potri.008G050700.3 | 9.1994 | 0 | 13.1673 | Up | 2.15E-16 | 8.32E-16 |
| Unigene85351 | Potri.001G333100.2 | 9.1954 | 0 | 13.1667 | Up | 5.89E-21 | 2.71E-20 |
| Unigene58210 | Potri.016G092900.1 | 9.1708 | 0 | 13.1628 | Up | 1.41E-68 | 1.94E-67 |
| Unigene75350 | Potri.003G088400.5 | 9.1553 | 0 | 13.1604 | Up | 4.15E-16 | 1.59E-15 |
| Unigene60965 | Potri.014G069100.1 | 9.1489 | 0 | 13.1594 | Up | 1.17E-26 | 6.43E-26 |
| Unigene93863 | Potri.004G187300.1 | 9.0713 | 0 | 13.1471 | Up | 1.28E-46 | 1.16E-45 |
| Unigene67744 | Potri.001G259000.1 | 9.0576 | 0 | 13.1449 | Up | 9.00E-42 | 7.36E-41 |
| Unigene57211 | Potri.018G115200.1 | 9.0546 | 0 | 13.1444 | Up | 8.14E-20 | 3.60E-19 |
| Unigene94409 | Potri.015G065800.1 | 9.0434 | 0 | 13.1426 | Up | 1.03E-71 | 1.49E-70 |
| Unigene92862 | Potri.013G018400.2 | 9.0335 | 0 | 13.1411 | Up | 4.54E-36 | 3.24E-35 |
| Unigene67408 | Potri.006G226800.3 | 9.0287 | 0 | 13.1403 | Up | 9.95E-64 | 1.26E-62 |
| Unigene64880 | Potri.001G044700.1 | 9.0266 | 0 | 13.14   | Up | 7.88E-85 | 1.38E-83 |
| Unigene93394 | Potri.003G109100.1 | 9.0146 | 0 | 13.138  | Up | 4.63E-40 | 3.63E-39 |
| Unigene72464 | Potri.017G056800.6 | 9.0096 | 0 | 13.1372 | Up | 5.73E-15 | 2.09E-14 |
| Unigene88920 | Potri.014G024500.1 | 8.9996 | 0 | 13.1356 | Up | 2.23E-24 | 1.14E-23 |
| Unigene94261 | Potri.004G132500.1 | 8.977  | 0 | 13.132  | Up | 9.68E-58 | 1.10E-56 |
| Unigene78523 | Potri.004G157100.2 | 8.9708 | 0 | 13.131  | Up | 5.79E-17 | 2.29E-16 |
| Unigene74648 | Potri.008G112800.1 | 8.9381 | 0 | 13.1258 | Up | 1.54E-15 | 5.75E-15 |
| Unigene66790 | Potri.006G092300.1 | 8.9364 | 0 | 13.1255 | Up | 1.67E-33 | 1.12E-32 |
| Unigene91034 | Potri.002G117800.1 | 8.8853 | 0 | 13.1172 | Up | 4.38E-28 | 2.52E-27 |
| Unigene77444 | Potri.018G024300.4 | 8.8808 | 0 | 13.1165 | Up | 2.15E-16 | 8.32E-16 |
| Unigene94163 | Potri.016G142900.2 | 8.8785 | 0 | 13.1161 | Up | 3.53E-53 | 3.68E-52 |
| Unigene93346 | Potri.010G148400.2 | 8.8619 | 0 | 13.1134 | Up | 6.39E-39 | 4.88E-38 |
| Unigene68738 | Potri.016G079900.3 | 8.8322 | 0 | 13.1086 | Up | 3.26E-35 | 2.27E-34 |
| Unigene75375 | Potri.002G091000.2 | 8.8163 | 0 | 13.106  | Up | 1.54E-15 | 5.75E-15 |
| Unigene54388 | Potri.006G104300.1 | 8.7982 | 0 | 13.103  | Up | 3.35E-41 | 2.70E-40 |
| Unigene73624 | Potri.005G071000.1 | 8.7971 | 0 | 13.1028 | Up | 5.73E-15 | 2.09E-14 |
| Unigene78713 | Potri.013G016700.1 | 8.7764 | 0 | 13.0994 | Up | 1.12E-16 | 4.37E-16 |
| Unigene68107 | Potri.014G123000.1 | 8.7297 | 0 | 13.0917 | Up | 1.27E-44 | 1.10E-43 |
| Unigene92882 | Potri.001G054400.1 | 8.725  | 0 | 13.0909 | Up | 6.28E-35 | 4.34E-34 |
| Unigene88672 | Potri.016G001100.1 | 8.7179 | 0 | 13.0898 | Up | 3.08E-23 | 1.53E-22 |
| Unigene93386 | Potri.004G189900.1 | 8.7032 | 0 | 13.0873 | Up | 1.23E-38 | 9.35E-38 |
| Unigene54576 | Potri.010G222800.1 | 8.6912 | 0 | 13.0853 | Up | 6.28E-35 | 4.34E-34 |
| Unigene66470 | Potri.010G195600.1 | 8.6912 | 0 | 13.0853 | Up | 6.28E-35 | 4.34E-34 |
| Unigene68549 | Potri.003G131500.2 | 8.6806 | 0 | 13.0836 | Up | 1.85E-55 | 2.02E-54 |
| Unigene63390 | Potri.004G144300.1 | 8.6798 | 0 | 13.0834 | Up | 8.22E-22 | 3.88E-21 |
| Unigene74204 | Potri.002G102600.1 | 8.6743 | 0 | 13.0825 | Up | 5.73E-15 | 2.09E-14 |

|               |                    |        |   |         |    |          |          |
|---------------|--------------------|--------|---|---------|----|----------|----------|
| Unigene68127  | Potri.010G221900.5 | 8.635  | 0 | 13.076  | Up | 2.27E-28 | 1.32E-27 |
| Unigene89203  | Potri.002G001400.1 | 8.6322 | 0 | 13.0755 | Up | 8.29E-24 | 4.18E-23 |
| Unigene87709  | Potri.001G002500.2 | 8.6255 | 0 | 13.0744 | Up | 8.22E-22 | 3.88E-21 |
| Unigene92003  | Potri.013G068000.1 | 8.6203 | 0 | 13.0735 | Up | 2.29E-30 | 1.41E-29 |
| Unigene64590  | Potri.002G236800.2 | 8.6146 | 0 | 13.0726 | Up | 1.63E-27 | 9.20E-27 |
| Unigene89635  | Potri.018G024300.4 | 8.5996 | 0 | 13.0701 | Up | 2.23E-24 | 1.14E-23 |
| Unigene90888  | Potri.012G038800.1 | 8.5283 | 0 | 13.058  | Up | 1.17E-26 | 6.43E-26 |
| Unigene64318  | Potri.019G025600.3 | 8.5128 | 0 | 13.0554 | Up | 2.21E-22 | 1.06E-21 |
| Unigene90309  | Potri.006G071000.3 | 8.4861 | 0 | 13.0509 | Up | 3.11E-25 | 1.64E-24 |
| Unigene84822  | Potri.001G067300.4 | 8.4651 | 0 | 13.0473 | Up | 5.84E-19 | 2.50E-18 |
| Unigene94476  | Potri.004G177900.1 | 8.4418 | 0 | 13.0433 | Up | 4.01E-81 | 6.68E-80 |
| Unigene64521  | Potri.010G056600.1 | 8.4352 | 0 | 13.0422 | Up | 5.84E-19 | 2.50E-18 |
| Unigene66147  | Potri.018G062500.2 | 8.4265 | 0 | 13.0407 | Up | 4.22E-20 | 1.89E-19 |
| Unigene78176  | Potri.001G109500.3 | 8.4122 | 0 | 13.0383 | Up | 8.00E-16 | 3.02E-15 |
| Unigene91229  | Potri.010G157300.2 | 8.3493 | 0 | 13.0274 | Up | 6.05E-27 | 3.36E-26 |
| Unigene93890  | Potri.001G334600.1 | 8.3382 | 0 | 13.0255 | Up | 1.75E-43 | 1.49E-42 |
| Unigene90903  | Potri.002G084400.1 | 8.3199 | 0 | 13.0224 | Up | 4.34E-26 | 2.35E-25 |
| Unigene78798  | Potri.006G269400.1 | 8.3062 | 0 | 13.02   | Up | 8.00E-16 | 3.02E-15 |
| Unigene61924  | Potri.006G070800.1 | 8.3065 | 0 | 13.02   | Up | 2.29E-30 | 1.41E-29 |
| Unigene83882  | Potri.009G069400.1 | 8.3039 | 0 | 13.0196 | Up | 4.19E-18 | 1.74E-17 |
| Unigene90443  | Potri.T015200.1    | 8.2996 | 0 | 13.0188 | Up | 6.00E-25 | 3.14E-24 |
| Unigene68379  | Potri.004G199500.1 | 8.2888 | 0 | 13.0169 | Up | 7.13E-63 | 8.91E-62 |
| Unigene72558  | Potri.001G026200.1 | 8.2888 | 0 | 13.0169 | Up | 7.92E-14 | 2.74E-13 |
| Unigene94016  | Potri.008G087400.1 | 8.2655 | 0 | 13.0129 | Up | 9.17E-46 | 8.18E-45 |
| Unigene59149  | Potri.005G067100.1 | 8.2652 | 0 | 13.0128 | Up | 3.41E-45 | 3.00E-44 |
| Unigene69526  | Potri.004G055900.1 | 8.242  | 0 | 13.0088 | Up | 8.92E-40 | 6.96E-39 |
| Unigene67647  | Potri.008G054600.2 | 8.2311 | 0 | 13.0069 | Up | 5.16E-64 | 6.59E-63 |
| Unigene61526  | Potri.016G104400.1 | 8.2206 | 0 | 13.005  | Up | 8.14E-20 | 3.60E-19 |
| Unigene65772  | Potri.001G118900.1 | 8.2203 | 0 | 13.005  | Up | 1.60E-23 | 7.98E-23 |
| Unigene64100  | Potri.003G046200.1 | 8.1704 | 0 | 12.9962 | Up | 7.92E-14 | 2.74E-13 |
| Unigene82429  | Potri.001G127600.1 | 8.1459 | 0 | 12.9919 | Up | 5.79E-17 | 2.29E-16 |
| Unigene58238  | Potri.013G049200.2 | 8.1364 | 0 | 12.9902 | Up | 4.34E-26 | 2.35E-25 |
| Unigene91150  | Potri.009G089100.1 | 8.1364 | 0 | 12.9902 | Up | 4.34E-26 | 2.35E-25 |
| Unigene92228  | Potri.006G268100.1 | 8.1366 | 0 | 12.9902 | Up | 1.64E-29 | 9.84E-29 |
| Unigene85100  | Potri.001G057800.1 | 8.1143 | 0 | 12.9863 | Up | 2.17E-18 | 9.10E-18 |
| Unigene65365  | Potri.017G099900.2 | 8.0835 | 0 | 12.9808 | Up | 1.14E-20 | 5.17E-20 |
| Unigene57778  | Potri.008G172600.1 | 8.0752 | 0 | 12.9793 | Up | 1.36E-60 | 1.64E-59 |
| Unigene100173 | Potri.019G083900.1 | 8.0696 | 0 | 12.9783 | Up | 1.53E-13 | 5.23E-13 |

|              |                    |        |   |         |    |          |          |
|--------------|--------------------|--------|---|---------|----|----------|----------|
| Unigene65442 | Potri.011G068600.5 | 8.0423 | 0 | 12.9734 | Up | 8.68E-34 | 5.83E-33 |
| Unigene64495 | Potri.014G064900.1 | 8.0265 | 0 | 12.9706 | Up | 4.22E-20 | 1.89E-19 |
| Unigene74032 | Potri.019G063300.1 | 8.0177 | 0 | 12.969  | Up | 7.92E-14 | 2.74E-13 |
| Unigene91933 | Potri.008G069400.1 | 7.945  | 0 | 12.9558 | Up | 8.45E-28 | 4.81E-27 |
| Unigene71365 | Potri.008G157500.2 | 7.9009 | 0 | 12.9478 | Up | 5.68E-13 | 1.89E-12 |
| Unigene76606 | Potri.008G112800.1 | 7.8871 | 0 | 12.9453 | Up | 2.13E-14 | 7.57E-14 |
| Unigene65588 | Potri.018G145200.1 | 7.8831 | 0 | 12.9445 | Up | 1.40E-66 | 1.87E-65 |
| Unigene88628 | Potri.002G067100.2 | 7.8584 | 0 | 12.94   | Up | 5.89E-21 | 2.71E-20 |
| Unigene65667 | Potri.001G276700.1 | 7.8319 | 0 | 12.9351 | Up | 1.60E-23 | 7.98E-23 |
| Unigene87899 | Potri.016G046700.3 | 7.8283 | 0 | 12.9345 | Up | 4.22E-20 | 1.89E-19 |
| Unigene74337 | Potri.008G165200.2 | 7.8069 | 0 | 12.9305 | Up | 1.53E-13 | 5.22E-13 |
| Unigene82630 | Potri.012G014100.1 | 7.8003 | 0 | 12.9293 | Up | 2.15E-16 | 8.32E-16 |
| Unigene90165 | Potri.003G049100.1 | 7.7583 | 0 | 12.9215 | Up | 5.95E-23 | 2.92E-22 |
| Unigene88384 | Potri.009G167000.1 | 7.752  | 0 | 12.9204 | Up | 2.19E-20 | 9.87E-20 |
| Unigene87601 | Potri.019G131400.8 | 7.7414 | 0 | 12.9184 | Up | 1.57E-19 | 6.87E-19 |
| Unigene93773 | Potri.007G134000.1 | 7.7392 | 0 | 12.918  | Up | 1.23E-38 | 9.35E-38 |
| Unigene66998 | Potri.008G050700.3 | 7.7316 | 0 | 12.9166 | Up | 8.22E-22 | 3.88E-21 |
| Unigene88498 | Potri.009G014100.1 | 7.7056 | 0 | 12.9117 | Up | 2.19E-20 | 9.87E-20 |
| Unigene80434 | Potri.007G142100.1 | 7.6705 | 0 | 12.9051 | Up | 2.97E-15 | 1.09E-14 |
| Unigene60725 | Potri.001G102500.1 | 7.6597 | 0 | 12.9031 | Up | 1.67E-33 | 1.12E-32 |
| Unigene66114 | Potri.005G024600.3 | 7.6058 | 0 | 12.8929 | Up | 1.58E-21 | 7.42E-21 |
| Unigene90287 | Potri.002G044700.1 | 7.5981 | 0 | 12.8914 | Up | 1.15E-22 | 5.56E-22 |
| Unigene62902 | Potri.002G091500.1 | 7.5863 | 0 | 12.8892 | Up | 1.16E-24 | 5.99E-24 |
| Unigene59212 | Potri.011G016400.2 | 7.5771 | 0 | 12.8874 | Up | 2.53E-52 | 2.60E-51 |
| Unigene90923 | Potri.002G146100.1 | 7.5721 | 0 | 12.8865 | Up | 8.29E-24 | 4.18E-23 |
| Unigene72548 | Potri.003G122900.1 | 7.568  | 0 | 12.8857 | Up | 1.10E-12 | 3.59E-12 |
| Unigene66598 | Potri.006G185300.1 | 7.5613 | 0 | 12.8844 | Up | 9.42E-52 | 9.54E-51 |
| Unigene65028 | Potri.018G124500.1 | 7.5603 | 0 | 12.8842 | Up | 1.97E-69 | 2.75E-68 |
| Unigene77685 | Potri.003G046200.1 | 7.5564 | 0 | 12.8835 | Up | 4.11E-14 | 1.44E-13 |
| Unigene87759 | Potri.012G053700.3 | 7.5529 | 0 | 12.8828 | Up | 3.03E-19 | 1.31E-18 |
| Unigene85693 | Potri.006G262700.2 | 7.5366 | 0 | 12.8797 | Up | 1.56E-17 | 6.31E-17 |
| Unigene91936 | Potri.003G123600.1 | 7.5268 | 0 | 12.8778 | Up | 2.25E-26 | 1.23E-25 |
| Unigene89089 | Potri.014G164900.6 | 7.5244 | 0 | 12.8774 | Up | 1.14E-20 | 5.17E-20 |
| Unigene69001 | Potri.006G242300.1 | 7.4866 | 0 | 12.8701 | Up | 1.20E-32 | 7.84E-32 |
| Unigene68031 | Potri.017G135500.1 | 7.4826 | 0 | 12.8693 | Up | 1.57E-19 | 6.87E-19 |
| Unigene66136 | Potri.004G191100.1 | 7.4752 | 0 | 12.8679 | Up | 2.58E-56 | 2.86E-55 |
| Unigene66393 | Potri.008G109400.2 | 7.4711 | 0 | 12.8671 | Up | 7.60E-77 | 1.19E-75 |
| Unigene54169 | Potri.018G066900.2 | 7.4599 | 0 | 12.8649 | Up | 6.51E-43 | 5.46E-42 |

|              |                    |        |   |         |    |          |          |
|--------------|--------------------|--------|---|---------|----|----------|----------|
| Unigene92754 | Potri.001G264400.6 | 7.4302 | 0 | 12.8592 | Up | 3.17E-29 | 1.88E-28 |
| Unigene64281 | Potri.002G044700.1 | 7.4296 | 0 | 12.8591 | Up | 1.18E-28 | 6.88E-28 |
| Unigene78380 | Potri.013G118200.1 | 7.4283 | 0 | 12.8588 | Up | 4.11E-14 | 1.44E-13 |
| Unigene85727 | Potri.009G036600.1 | 7.4088 | 0 | 12.855  | Up | 3.00E-17 | 1.20E-16 |
| Unigene69887 | Potri.014G153400.2 | 7.4076 | 0 | 12.8548 | Up | 6.00E-25 | 3.14E-24 |
| Unigene72452 | Potri.008G115200.2 | 7.3878 | 0 | 12.8509 | Up | 2.11E-12 | 6.83E-12 |
| Unigene65532 | Potri.004G104800.6 | 7.386  | 0 | 12.8506 | Up | 1.60E-23 | 7.98E-23 |
| Unigene83917 | Potri.006G095200.1 | 7.351  | 0 | 12.8437 | Up | 4.15E-16 | 1.59E-15 |
| Unigene91953 | Potri.011G050600.1 | 7.3431 | 0 | 12.8422 | Up | 8.37E-26 | 4.49E-25 |
| Unigene81315 | Potri.003G148200.1 | 7.3424 | 0 | 12.842  | Up | 5.73E-15 | 2.09E-14 |
| Unigene61032 | Potri.001G224400.1 | 7.3404 | 0 | 12.8416 | Up | 3.11E-25 | 1.64E-24 |
| Unigene62967 | Potri.T128500.1    | 7.3288 | 0 | 12.8394 | Up | 8.76E-36 | 6.20E-35 |
| Unigene88006 | Potri.005G093500.1 | 7.3226 | 0 | 12.8381 | Up | 5.84E-19 | 2.50E-18 |
| Unigene66561 | Potri.012G142100.1 | 7.3187 | 0 | 12.8374 | Up | 3.23E-33 | 2.14E-32 |
| Unigene54200 | Potri.017G148800.1 | 7.2823 | 0 | 12.8302 | Up | 2.11E-12 | 6.84E-12 |
| Unigene54038 | Potri.002G081400.2 | 7.2686 | 0 | 12.8275 | Up | 2.21E-22 | 1.06E-21 |
| Unigene56947 | Potri.012G094300.2 | 7.2452 | 0 | 12.8228 | Up | 4.15E-16 | 1.59E-15 |
| Unigene71039 | Potri.014G069100.3 | 7.2372 | 0 | 12.8212 | Up | 7.85E-12 | 2.47E-11 |
| Unigene63591 | Potri.006G053400.2 | 7.2372 | 0 | 12.8212 | Up | 1.54E-15 | 5.75E-15 |
| Unigene93858 | Potri.010G148100.3 | 7.2339 | 0 | 12.8206 | Up | 3.29E-37 | 2.41E-36 |
| Unigene81302 | Potri.018G115100.4 | 7.224  | 0 | 12.8186 | Up | 1.11E-14 | 3.98E-14 |
| Unigene81256 | Potri.005G251400.1 | 7.224  | 0 | 12.8186 | Up | 1.11E-14 | 3.98E-14 |
| Unigene88847 | Potri.017G123900.1 | 7.1982 | 0 | 12.8134 | Up | 1.57E-19 | 6.87E-19 |
| Unigene68364 | Potri.017G138200.1 | 7.1563 | 0 | 12.805  | Up | 9.25E-48 | 8.63E-47 |
| Unigene88714 | Potri.012G039700.2 | 7.1518 | 0 | 12.8041 | Up | 3.03E-19 | 1.31E-18 |
| Unigene88211 | Potri.004G205100.2 | 7.1425 | 0 | 12.8022 | Up | 1.13E-18 | 4.77E-18 |
| Unigene62460 | Potri.001G148800.1 | 7.1356 | 0 | 12.8008 | Up | 1.57E-19 | 6.88E-19 |
| Unigene92085 | Potri.016G061900.1 | 7.132  | 0 | 12.8001 | Up | 1.61E-25 | 8.57E-25 |
| Unigene93503 | Potri.010G243200.1 | 7.1047 | 0 | 12.7946 | Up | 1.20E-32 | 7.84E-32 |
| Unigene93332 | Potri.005G207700.1 | 7.1015 | 0 | 12.7939 | Up | 3.20E-31 | 2.01E-30 |
| Unigene66326 | Potri.008G101500.2 | 7.0968 | 0 | 12.793  | Up | 5.68E-13 | 1.89E-12 |
| Unigene93532 | Potri.014G098700.1 | 7.0838 | 0 | 12.7903 | Up | 6.22E-33 | 4.10E-32 |
| Unigene93339 | Potri.003G001200.1 | 7.0763 | 0 | 12.7888 | Up | 3.20E-31 | 2.01E-30 |
| Unigene59928 | Potri.008G211100.1 | 7.0728 | 0 | 12.7881 | Up | 8.45E-28 | 4.81E-27 |
| Unigene92982 | Potri.014G056700.5 | 7.0605 | 0 | 12.7856 | Up | 6.11E-29 | 3.60E-28 |
| Unigene67578 | Potri.011G083900.1 | 7.0543 | 0 | 12.7843 | Up | 2.47E-46 | 2.23E-45 |
| Unigene77802 | Potri.001G237000.3 | 7.0437 | 0 | 12.7821 | Up | 2.95E-13 | 9.94E-13 |
| Unigene94029 | Potri.018G013200.1 | 7.0229 | 0 | 12.7779 | Up | 3.32E-39 | 2.55E-38 |



|              |                    |        |   |         |    |          |          |
|--------------|--------------------|--------|---|---------|----|----------|----------|
| Unigene68368 | Potri.004G034100.3 | 7.0016 | 0 | 12.7735 | Up | 2.15E-16 | 8.33E-16 |
| Unigene78179 | Potri.001G235800.1 | 6.9837 | 0 | 12.7698 | Up | 2.95E-13 | 9.94E-13 |
| Unigene62634 | Potri.017G114000.5 | 6.9826 | 0 | 12.7695 | Up | 3.08E-23 | 1.53E-22 |
| Unigene89551 | Potri.004G175400.2 | 6.9806 | 0 | 12.7691 | Up | 8.14E-20 | 3.60E-19 |
| Unigene78323 | Potri.014G097100.2 | 6.9542 | 0 | 12.7637 | Up | 2.95E-13 | 9.94E-13 |
| Unigene75235 | Potri.005G247900.6 | 6.9513 | 0 | 12.7631 | Up | 2.11E-12 | 6.83E-12 |
| Unigene63944 | Potri.001G372100.4 | 6.9493 | 0 | 12.7627 | Up | 1.18E-28 | 6.88E-28 |
| Unigene91399 | Potri.T005900.1    | 6.9436 | 0 | 12.7615 | Up | 5.95E-23 | 2.91E-22 |
| Unigene93085 | Potri.005G251500.1 | 6.9281 | 0 | 12.7582 | Up | 6.11E-29 | 3.60E-28 |
| Unigene93499 | Potri.005G251300.4 | 6.9144 | 0 | 12.7554 | Up | 8.60E-32 | 5.49E-31 |
| Unigene64853 | Potri.003G136200.2 | 6.8917 | 0 | 12.7506 | Up | 3.23E-33 | 2.14E-32 |
| Unigene65923 | Potri.014G095700.1 | 6.8893 | 0 | 12.7501 | Up | 6.11E-29 | 3.60E-28 |
| Unigene68840 | Potri.006G126400.1 | 6.8853 | 0 | 12.7493 | Up | 2.40E-40 | 1.90E-39 |
| Unigene79772 | Potri.016G120000.1 | 6.879  | 0 | 12.748  | Up | 1.53E-13 | 5.22E-13 |
| Unigene68344 | Potri.001G172000.1 | 6.8768 | 0 | 12.7475 | Up | 2.36E-36 | 1.69E-35 |
| Unigene74939 | Potri.007G065500.4 | 6.844  | 0 | 12.7406 | Up | 4.07E-12 | 1.30E-11 |
| Unigene77051 | Potri.006G065000.2 | 6.841  | 0 | 12.74   | Up | 1.10E-12 | 3.59E-12 |
| Unigene93514 | Potri.006G064300.1 | 6.8277 | 0 | 12.7372 | Up | 1.66E-31 | 1.05E-30 |
| Unigene90604 | Potri.013G047000.1 | 6.8254 | 0 | 12.7367 | Up | 5.89E-21 | 2.71E-20 |
| Unigene84536 | Potri.017G003400.1 | 6.8182 | 0 | 12.7352 | Up | 2.97E-15 | 1.09E-14 |
| Unigene64995 | Potri.018G013300.1 | 6.8095 | 0 | 12.7333 | Up | 8.14E-20 | 3.60E-19 |
| Unigene62179 | Potri.019G082800.1 | 6.8086 | 0 | 12.7331 | Up | 7.92E-14 | 2.74E-13 |
| Unigene82024 | Potri.010G154000.2 | 6.7949 | 0 | 12.7302 | Up | 4.11E-14 | 1.44E-13 |
| Unigene81189 | Potri.008G192500.1 | 6.7817 | 0 | 12.7274 | Up | 7.92E-14 | 2.74E-13 |
| Unigene64166 | Potri.002G139600.1 | 6.7817 | 0 | 12.7274 | Up | 5.95E-23 | 2.92E-22 |
| Unigene93417 | Potri.004G177900.1 | 6.7581 | 0 | 12.7224 | Up | 2.29E-30 | 1.41E-29 |
| Unigene63087 | Potri.016G044800.2 | 6.755  | 0 | 12.7217 | Up | 7.92E-14 | 2.74E-13 |
| Unigene63572 | Potri.014G164900.7 | 6.7494 | 0 | 12.7205 | Up | 5.79E-17 | 2.29E-16 |
| Unigene84784 | Potri.001G148800.3 | 6.7457 | 0 | 12.7198 | Up | 2.97E-15 | 1.09E-14 |
| Unigene91656 | Potri.008G112800.1 | 6.7346 | 0 | 12.7174 | Up | 5.95E-23 | 2.91E-22 |
| Unigene81623 | Potri.001G056500.2 | 6.7285 | 0 | 12.7161 | Up | 7.92E-14 | 2.74E-13 |
| Unigene77862 | Potri.008G027000.1 | 6.7235 | 0 | 12.715  | Up | 1.10E-12 | 3.59E-12 |
| Unigene94182 | Potri.015G072800.1 | 6.7168 | 0 | 12.7136 | Up | 6.45E-41 | 5.17E-40 |
| Unigene79109 | Potri.004G177100.2 | 6.6828 | 0 | 12.7062 | Up | 5.68E-13 | 1.89E-12 |
| Unigene60987 | Potri.008G029300.2 | 6.6815 | 0 | 12.706  | Up | 4.42E-30 | 2.69E-29 |
| Unigene94293 | Potri.019G108800.1 | 6.6747 | 0 | 12.7045 | Up | 2.44E-44 | 2.11E-43 |
| Unigene66438 | Potri.018G069200.6 | 6.6559 | 0 | 12.7004 | Up | 1.64E-29 | 9.84E-29 |
| Unigene93565 | Potri.006G081100.4 | 6.6518 | 0 | 12.6995 | Up | 3.20E-31 | 2.01E-30 |

|              |                    |        |   |         |    |          |          |
|--------------|--------------------|--------|---|---------|----|----------|----------|
| Unigene69051 | Potri.017G123900.1 | 6.6491 | 0 | 12.6989 | Up | 8.76E-36 | 6.20E-35 |
| Unigene64631 | Potri.018G003400.1 | 6.631  | 0 | 12.695  | Up | 2.13E-14 | 7.57E-14 |
| Unigene64086 | Potri.003G058400.1 | 6.5627 | 0 | 12.6801 | Up | 3.08E-23 | 1.53E-22 |
| Unigene93833 | Potri.010G163000.1 | 6.5588 | 0 | 12.6792 | Up | 1.67E-33 | 1.12E-32 |
| Unigene92390 | Potri.004G185500.1 | 6.5452 | 0 | 12.6762 | Up | 2.23E-24 | 1.14E-23 |
| Unigene62070 | Potri.010G062700.1 | 6.5292 | 0 | 12.6727 | Up | 1.63E-27 | 9.20E-27 |
| Unigene90082 | Potri.011G123700.3 | 6.5174 | 0 | 12.6701 | Up | 3.03E-19 | 1.31E-18 |
| Unigene62387 | Potri.018G081800.1 | 6.492  | 0 | 12.6644 | Up | 2.15E-16 | 8.33E-16 |
| Unigene54457 | Potri.014G116300.1 | 6.4793 | 0 | 12.6616 | Up | 2.31E-32 | 1.50E-31 |
| Unigene80418 | Potri.005G058200.1 | 6.4673 | 0 | 12.6589 | Up | 5.68E-13 | 1.89E-12 |
| Unigene76320 | Potri.015G030400.1 | 6.4653 | 0 | 12.6585 | Up | 7.85E-12 | 2.47E-11 |
| Unigene59978 | Potri.004G217700.2 | 6.4578 | 0 | 12.6568 | Up | 3.00E-17 | 1.20E-16 |
| Unigene74062 | Potri.010G223000.1 | 6.449  | 0 | 12.6549 | Up | 2.92E-11 | 8.93E-11 |
| Unigene79615 | Potri.015G057100.4 | 6.4468 | 0 | 12.6544 | Up | 1.10E-12 | 3.59E-12 |
| Unigene89617 | Potri.008G151200.1 | 6.4417 | 0 | 12.6532 | Up | 2.17E-18 | 9.10E-18 |
| Unigene93088 | Potri.001G072000.1 | 6.4382 | 0 | 12.6524 | Up | 6.05E-27 | 3.36E-26 |
| Unigene61011 | Potri.001G002700.1 | 6.4365 | 0 | 12.6521 | Up | 1.28E-46 | 1.16E-45 |
| Unigene68097 | Potri.016G101700.1 | 6.434  | 0 | 12.6515 | Up | 8.22E-22 | 3.88E-21 |
| Unigene70224 | Potri.010G058700.1 | 6.4285 | 0 | 12.6503 | Up | 1.31E-52 | 1.36E-51 |
| Unigene92847 | Potri.012G042000.1 | 6.4234 | 0 | 12.6491 | Up | 8.37E-26 | 4.49E-25 |
| Unigene90486 | Potri.011G085000.1 | 6.4109 | 0 | 12.6463 | Up | 1.57E-19 | 6.87E-19 |
| Unigene62766 | Potri.004G010500.1 | 6.4083 | 0 | 12.6457 | Up | 7.85E-12 | 2.47E-11 |
| Unigene86557 | Potri.002G089400.2 | 6.4012 | 0 | 12.6441 | Up | 1.54E-15 | 5.75E-15 |
| Unigene71766 | Potri.006G222800.1 | 6.3994 | 0 | 12.6437 | Up | 1.09E-10 | 3.22E-10 |
| Unigene64494 | Potri.010G077900.1 | 6.3893 | 0 | 12.6414 | Up | 2.92E-11 | 8.93E-11 |
| Unigene66405 | Potri.002G059400.1 | 6.3883 | 0 | 12.6412 | Up | 2.17E-18 | 9.10E-18 |
| Unigene90123 | Potri.012G066600.3 | 6.3828 | 0 | 12.64   | Up | 5.84E-19 | 2.50E-18 |
| Unigene90130 | Potri.004G147200.2 | 6.3828 | 0 | 12.64   | Up | 5.84E-19 | 2.50E-18 |
| Unigene94411 | Potri.003G101600.1 | 6.3373 | 0 | 12.6297 | Up | 1.30E-50 | 1.29E-49 |
| Unigene88255 | Potri.006G280200.3 | 6.3296 | 0 | 12.6279 | Up | 1.12E-16 | 4.37E-16 |
| Unigene61177 | Potri.005G086300.1 | 6.3279 | 0 | 12.6275 | Up | 7.13E-63 | 8.91E-62 |
| Unigene79348 | Potri.001G264400.6 | 6.3193 | 0 | 12.6255 | Up | 2.11E-12 | 6.83E-12 |
| Unigene73925 | Potri.005G099600.2 | 6.3041 | 0 | 12.6221 | Up | 5.63E-11 | 1.70E-10 |
| Unigene92636 | Potri.017G152900.1 | 6.2924 | 0 | 12.6194 | Up | 2.23E-24 | 1.14E-23 |
| Unigene93341 | Potri.004G118600.1 | 6.2827 | 0 | 12.6172 | Up | 8.45E-28 | 4.81E-27 |
| Unigene93725 | Potri.001G148800.1 | 6.2758 | 0 | 12.6156 | Up | 6.17E-31 | 3.84E-30 |
| Unigene94152 | Potri.T106400.1    | 6.2489 | 0 | 12.6094 | Up | 1.70E-37 | 1.26E-36 |
| Unigene75528 | Potri.007G107400.1 | 6.2447 | 0 | 12.6084 | Up | 2.92E-11 | 8.93E-11 |

|              |                    |        |   |         |    |          |          |
|--------------|--------------------|--------|---|---------|----|----------|----------|
| Unigene76761 | Potri.013G127900.1 | 6.244  | 0 | 12.6083 | Up | 1.51E-11 | 4.70E-11 |
| Unigene76590 | Potri.001G436100.1 | 6.244  | 0 | 12.6083 | Up | 1.51E-11 | 4.70E-11 |
| Unigene61555 | Potri.001G088800.1 | 6.2266 | 0 | 12.6042 | Up | 2.29E-30 | 1.41E-29 |
| Unigene64245 | Potri.006G000600.3 | 6.2052 | 0 | 12.5993 | Up | 1.17E-26 | 6.43E-26 |
| Unigene91324 | Potri.002G249400.1 | 6.1867 | 0 | 12.595  | Up | 2.19E-20 | 9.87E-20 |
| Unigene62734 | Potri.006G281100.3 | 6.1785 | 0 | 12.593  | Up | 4.15E-16 | 1.59E-15 |
| Unigene74967 | Potri.008G029300.2 | 6.1596 | 0 | 12.5886 | Up | 5.63E-11 | 1.70E-10 |
| Unigene94295 | Potri.004G029700.1 | 6.144  | 0 | 12.585  | Up | 6.45E-41 | 5.17E-40 |
| Unigene67789 | Potri.001G342100.1 | 6.1238 | 0 | 12.5802 | Up | 1.57E-19 | 6.87E-19 |
| Unigene64354 | Potri.010G175200.1 | 6.1105 | 0 | 12.5771 | Up | 2.13E-14 | 7.57E-14 |
| Unigene74119 | Potri.006G064300.1 | 6.1004 | 0 | 12.5747 | Up | 1.09E-10 | 3.22E-10 |
| Unigene81857 | Potri.004G067400.1 | 6.0956 | 0 | 12.5736 | Up | 1.10E-12 | 3.59E-12 |
| Unigene93608 | Potri.001G294700.1 | 6.0935 | 0 | 12.5731 | Up | 6.11E-29 | 3.60E-28 |
| Unigene91084 | Potri.003G073400.1 | 6.0784 | 0 | 12.5695 | Up | 1.57E-19 | 6.87E-19 |
| Unigene94203 | Potri.T001800.1    | 6.0764 | 0 | 12.569  | Up | 8.84E-38 | 6.57E-37 |
| Unigene55365 | Potri.013G059300.3 | 6.0691 | 0 | 12.5673 | Up | 2.13E-14 | 7.57E-14 |
| Unigene94336 | Potri.006G084400.1 | 6.0586 | 0 | 12.5648 | Up | 1.26E-42 | 1.05E-41 |
| Unigene93225 | Potri.006G119100.1 | 6.0578 | 0 | 12.5646 | Up | 4.34E-26 | 2.35E-25 |
| Unigene87770 | Potri.001G332600.1 | 6.0423 | 0 | 12.5609 | Up | 1.54E-15 | 5.75E-15 |
| Unigene61867 | Potri.014G160000.4 | 6.0404 | 0 | 12.5604 | Up | 4.07E-12 | 1.30E-11 |
| Unigene90501 | Potri.004G167000.1 | 6.0223 | 0 | 12.5561 | Up | 2.17E-18 | 9.10E-18 |
| Unigene63623 | Potri.002G102600.1 | 6.007  | 0 | 12.5524 | Up | 5.68E-13 | 1.89E-12 |
| Unigene60963 | Potri.011G165600.1 | 6.0043 | 0 | 12.5518 | Up | 4.04E-10 | 1.16E-09 |
| Unigene94437 | Potri.010G142500.1 | 5.9995 | 0 | 12.5506 | Up | 1.30E-50 | 1.29E-49 |
| Unigene67481 | Potri.004G168400.1 | 5.9835 | 0 | 12.5468 | Up | 1.15E-22 | 5.57E-22 |
| Unigene70246 | Potri.018G013200.1 | 5.9808 | 0 | 12.5461 | Up | 3.14E-27 | 1.76E-26 |
| Unigene60803 | Potri.014G116300.1 | 5.9752 | 0 | 12.5448 | Up | 6.11E-29 | 3.60E-28 |
| Unigene67421 | Potri.002G102600.1 | 5.9581 | 0 | 12.5406 | Up | 1.58E-21 | 7.42E-21 |
| Unigene92953 | Potri.010G234300.2 | 5.9536 | 0 | 12.5395 | Up | 2.23E-24 | 1.14E-23 |
| Unigene64684 | Potri.007G010600.2 | 5.9479 | 0 | 12.5382 | Up | 3.20E-31 | 2.01E-30 |
| Unigene88992 | Potri.014G093100.1 | 5.9463 | 0 | 12.5378 | Up | 2.15E-16 | 8.32E-16 |
| Unigene87324 | Potri.006G014100.1 | 5.9394 | 0 | 12.5361 | Up | 5.73E-15 | 2.09E-14 |
| Unigene93582 | Potri.014G094200.3 | 5.9382 | 0 | 12.5358 | Up | 4.38E-28 | 2.52E-27 |
| Unigene57244 | Potri.015G081700.1 | 5.935  | 0 | 12.535  | Up | 8.92E-40 | 6.96E-39 |
| Unigene88754 | Potri.013G101700.4 | 5.924  | 0 | 12.5324 | Up | 4.15E-16 | 1.59E-15 |
| Unigene63904 | Potri.008G035200.1 | 5.9226 | 0 | 12.532  | Up | 4.11E-14 | 1.44E-13 |
| Unigene68689 | Potri.001G110800.1 | 5.9143 | 0 | 12.53   | Up | 1.75E-43 | 1.49E-42 |
| Unigene56019 | Potri.013G118200.1 | 5.9005 | 0 | 12.5266 | Up | 1.16E-24 | 5.99E-24 |

|               |                    |            |        |         |    |          |          |
|---------------|--------------------|------------|--------|---------|----|----------|----------|
| Unigene63975  | Potri.002G088000.3 | 5.8944     | 0      | 12.5251 | Up | 2.36E-36 | 1.69E-35 |
| Unigene92421  | Potri.011G168900.1 | 5.8894     | 0      | 12.5239 | Up | 4.26E-22 | 2.03E-21 |
| Unigene70232  | Potri.008G010000.1 | 5.8817     | 0      | 12.522  | Up | 2.60E-58 | 3.00E-57 |
| Unigene92964  | Potri.009G054200.2 | 5.8706     | 0      | 12.5193 | Up | 4.30E-24 | 2.19E-23 |
| Unigene113351 | Potri.001G042700.1 | 15844.9372 | 2.7002 | 12.5187 | Up | 0        | 0        |
| Unigene65498  | Potri.010G253300.1 | 5.8664     | 0      | 12.5183 | Up | 8.14E-20 | 3.60E-19 |
| Unigene65471  | Potri.011G166400.2 | 5.8626     | 0      | 12.5173 | Up | 2.19E-20 | 9.88E-20 |
| Unigene59715  | Potri.010G086500.1 | 5.857      | 0      | 12.5159 | Up | 1.51E-11 | 4.70E-11 |
| Unigene71696  | Potri.001G383000.9 | 5.8509     | 0      | 12.5144 | Up | 7.78E-10 | 2.20E-09 |
| Unigene94456  | Potri.004G199500.1 | 5.8452     | 0      | 12.513  | Up | 2.53E-52 | 2.60E-51 |
| Unigene69000  | Potri.T120200.1    | 5.8346     | 0      | 12.5104 | Up | 1.16E-24 | 5.99E-24 |
| Unigene59731  | Potri.014G078900.2 | 5.8226     | 0      | 12.5074 | Up | 1.64E-29 | 9.84E-29 |
| Unigene55718  | Potri.006G021600.2 | 5.8174     | 0      | 12.5062 | Up | 4.22E-20 | 1.89E-19 |
| Unigene65556  | Potri.010G000900.1 | 5.8141     | 0      | 12.5053 | Up | 3.03E-19 | 1.31E-18 |
| Unigene77420  | Potri.001G264400.1 | 5.8129     | 0      | 12.505  | Up | 5.63E-11 | 1.70E-10 |
| Unigene69618  | Potri.007G076800.1 | 5.8103     | 0      | 12.5044 | Up | 1.74E-41 | 1.41E-40 |
| Unigene63167  | Potri.016G126300.1 | 5.8079     | 0      | 12.5038 | Up | 5.97E-96 | 1.21E-94 |
| Unigene75108  | Potri.008G196700.1 | 5.7908     | 0      | 12.4995 | Up | 2.09E-10 | 6.11E-10 |
| Unigene53928  | Potri.001G207400.1 | 5.7788     | 0      | 12.4966 | Up | 1.15E-22 | 5.57E-22 |
| Unigene64622  | Potri.005G093300.1 | 5.7709     | 0      | 12.4946 | Up | 2.11E-12 | 6.84E-12 |
| Unigene90618  | Potri.007G069900.1 | 5.768      | 0      | 12.4939 | Up | 8.07E-18 | 3.31E-17 |
| Unigene65980  | Potri.004G006100.1 | 5.7661     | 0      | 12.4934 | Up | 4.38E-28 | 2.52E-27 |
| Unigene62339  | Potri.005G181700.1 | 5.763      | 0      | 12.4926 | Up | 1.66E-31 | 1.05E-30 |
| Unigene71018  | Potri.014G016900.1 | 5.7527     | 0      | 12.49   | Up | 1.50E-09 | 4.17E-09 |
| Unigene70247  | Potri.001G148800.1 | 5.7524     | 0      | 12.4899 | Up | 8.45E-28 | 4.81E-27 |
| Unigene66906  | Potri.009G128500.1 | 5.7454     | 0      | 12.4882 | Up | 1.22E-36 | 8.84E-36 |
| Unigene66740  | Potri.002G196300.1 | 5.7343     | 0      | 12.4854 | Up | 3.20E-31 | 2.01E-30 |
| Unigene90487  | Potri.012G139000.1 | 5.7309     | 0      | 12.4845 | Up | 1.56E-17 | 6.31E-17 |
| Unigene79318  | Potri.008G087100.3 | 5.7265     | 0      | 12.4834 | Up | 2.92E-11 | 8.93E-11 |
| Unigene93929  | Potri.014G104400.1 | 5.7258     | 0      | 12.4833 | Up | 1.19E-30 | 7.35E-30 |
| Unigene71167  | Potri.002G248400.1 | 5.7242     | 0      | 12.4829 | Up | 1.50E-09 | 4.17E-09 |
| Unigene94422  | Potri.017G050600.1 | 5.7221     | 0      | 12.4823 | Up | 6.63E-47 | 6.07E-46 |
| Unigene61758  | Potri.002G020800.1 | 5.7208     | 0      | 12.482  | Up | 5.73E-15 | 2.09E-14 |
| Unigene87244  | Potri.005G021700.1 | 5.7201     | 0      | 12.4818 | Up | 2.13E-14 | 7.57E-14 |
| Unigene83927  | Potri.013G096600.3 | 5.7174     | 0      | 12.4811 | Up | 1.10E-12 | 3.59E-12 |
| Unigene93500  | Potri.014G052500.2 | 5.7091     | 0      | 12.479  | Up | 2.25E-26 | 1.23E-25 |
| Unigene91767  | Potri.004G197700.1 | 5.7056     | 0      | 12.4782 | Up | 8.14E-20 | 3.60E-19 |
| Unigene81485  | Potri.010G073400.1 | 5.7046     | 0      | 12.4779 | Up | 7.85E-12 | 2.47E-11 |

|              |                    |        |   |         |    |          |          |
|--------------|--------------------|--------|---|---------|----|----------|----------|
| Unigene65744 | Potri.001G148800.1 | 5.6992 | 0 | 12.4765 | Up | 8.76E-36 | 6.20E-35 |
| Unigene64401 | Potri.001G148800.1 | 5.6967 | 0 | 12.4759 | Up | 1.10E-12 | 3.59E-12 |
| Unigene69265 | Potri.001G001400.2 | 5.6959 | 0 | 12.4757 | Up | 1.88E-59 | 2.22E-58 |
| Unigene66342 | Potri.001G148800.1 | 5.6923 | 0 | 12.4748 | Up | 1.51E-11 | 4.70E-11 |
| Unigene83352 | Potri.004G034100.2 | 5.6851 | 0 | 12.473  | Up | 2.11E-12 | 6.83E-12 |
| Unigene94365 | Potri.008G112800.1 | 5.6803 | 0 | 12.4718 | Up | 1.74E-41 | 1.41E-40 |
| Unigene93448 | Potri.011G110800.3 | 5.6788 | 0 | 12.4714 | Up | 8.37E-26 | 4.49E-25 |
| Unigene91314 | Potri.002G203200.1 | 5.6623 | 0 | 12.4672 | Up | 1.13E-18 | 4.77E-18 |
| Unigene61317 | Potri.008G035700.1 | 5.6561 | 0 | 12.4656 | Up | 2.92E-11 | 8.94E-11 |
| Unigene89757 | Potri.006G262700.2 | 5.6514 | 0 | 12.4644 | Up | 2.15E-16 | 8.32E-16 |
| Unigene93233 | Potri.003G001300.1 | 5.6391 | 0 | 12.4612 | Up | 2.23E-24 | 1.14E-23 |
| Unigene66209 | Potri.014G174700.1 | 5.6224 | 0 | 12.457  | Up | 4.30E-24 | 2.19E-23 |
| Unigene73899 | Potri.004G217700.4 | 5.6037 | 0 | 12.4522 | Up | 7.78E-10 | 2.20E-09 |
| Unigene90104 | Potri.002G235700.1 | 5.5999 | 0 | 12.4512 | Up | 1.12E-16 | 4.37E-16 |
| Unigene68165 | Potri.003G045000.1 | 5.5949 | 0 | 12.4499 | Up | 4.50E-34 | 3.05E-33 |
| Unigene66039 | Potri.007G031400.1 | 5.5889 | 0 | 12.4483 | Up | 7.92E-14 | 2.74E-13 |
| Unigene83156 | Potri.005G059600.1 | 5.5879 | 0 | 12.4481 | Up | 4.07E-12 | 1.30E-11 |
| Unigene91963 | Potri.002G130900.1 | 5.5783 | 0 | 12.4456 | Up | 8.14E-20 | 3.60E-19 |
| Unigene59744 | Potri.014G120900.1 | 5.5775 | 0 | 12.4454 | Up | 7.78E-10 | 2.20E-09 |
| Unigene64399 | Potri.003G165600.1 | 5.5715 | 0 | 12.4439 | Up | 8.45E-28 | 4.81E-27 |
| Unigene93120 | Potri.004G197700.1 | 5.5671 | 0 | 12.4427 | Up | 1.60E-23 | 7.98E-23 |
| Unigene87806 | Potri.005G191500.2 | 5.5602 | 0 | 12.4409 | Up | 2.13E-14 | 7.57E-14 |
| Unigene88577 | Potri.001G107900.1 | 5.5505 | 0 | 12.4384 | Up | 5.73E-15 | 2.09E-14 |
| Unigene94041 | Potri.003G151100.1 | 5.5431 | 0 | 12.4365 | Up | 3.20E-31 | 2.01E-30 |
| Unigene65430 | Potri.002G231900.1 | 5.543  | 0 | 12.4365 | Up | 2.13E-14 | 7.57E-14 |
| Unigene66657 | Potri.014G164900.6 | 5.5395 | 0 | 12.4355 | Up | 8.07E-18 | 3.31E-17 |
| Unigene90046 | Potri.012G141300.3 | 5.5296 | 0 | 12.433  | Up | 2.15E-16 | 8.32E-16 |
| Unigene58840 | Potri.010G058700.2 | 5.5285 | 0 | 12.4327 | Up | 3.08E-23 | 1.53E-22 |
| Unigene55174 | Potri.003G073400.3 | 5.5259 | 0 | 12.432  | Up | 5.63E-11 | 1.70E-10 |
| Unigene68963 | Potri.001G385200.1 | 5.5233 | 0 | 12.4313 | Up | 8.29E-24 | 4.18E-23 |
| Unigene92274 | Potri.001G294700.1 | 5.5229 | 0 | 12.4312 | Up | 2.19E-20 | 9.87E-20 |
| Unigene89810 | Potri.002G004100.2 | 5.5183 | 0 | 12.43   | Up | 4.15E-16 | 1.59E-15 |
| Unigene87603 | Potri.002G235700.1 | 5.5128 | 0 | 12.4286 | Up | 4.11E-14 | 1.44E-13 |
| Unigene91431 | Potri.002G023700.1 | 5.5061 | 0 | 12.4268 | Up | 2.17E-18 | 9.10E-18 |
| Unigene63383 | Potri.009G144500.1 | 5.5018 | 0 | 12.4257 | Up | 6.34E-37 | 4.62E-36 |
| Unigene74762 | Potri.008G191400.1 | 5.5004 | 0 | 12.4253 | Up | 7.78E-10 | 2.20E-09 |
| Unigene70089 | Potri.006G022100.1 | 5.4943 | 0 | 12.4237 | Up | 5.89E-21 | 2.71E-20 |
| Unigene64577 | Potri.008G083400.1 | 5.4852 | 0 | 12.4213 | Up | 1.60E-23 | 7.98E-23 |

|              |                    |        |   |         |    |          |          |
|--------------|--------------------|--------|---|---------|----|----------|----------|
| Unigene62606 | Potri.008G192600.1 | 5.4651 | 0 | 12.416  | Up | 4.07E-12 | 1.30E-11 |
| Unigene85863 | Potri.007G142000.1 | 5.4554 | 0 | 12.4135 | Up | 5.68E-13 | 1.89E-12 |
| Unigene66182 | Potri.014G039000.1 | 5.4351 | 0 | 12.4081 | Up | 2.97E-15 | 1.10E-14 |
| Unigene79315 | Potri.019G131200.2 | 5.4169 | 0 | 12.4033 | Up | 1.09E-10 | 3.22E-10 |
| Unigene92516 | Potri.004G191000.1 | 5.4169 | 0 | 12.4033 | Up | 1.14E-20 | 5.17E-20 |
| Unigene92784 | Potri.003G109100.1 | 5.4025 | 0 | 12.3994 | Up | 1.58E-21 | 7.42E-21 |
| Unigene81689 | Potri.008G102700.2 | 5.391  | 0 | 12.3963 | Up | 2.92E-11 | 8.93E-11 |
| Unigene70187 | Potri.012G096200.1 | 5.3794 | 0 | 12.3932 | Up | 9.08E-44 | 7.76E-43 |
| Unigene64865 | Potri.016G113700.1 | 5.3659 | 0 | 12.3896 | Up | 2.11E-12 | 6.84E-12 |
| Unigene64420 | Potri.003G151100.1 | 5.365  | 0 | 12.3894 | Up | 1.16E-24 | 5.99E-24 |
| Unigene68894 | Potri.003G108300.1 | 5.3646 | 0 | 12.3893 | Up | 6.00E-25 | 3.14E-24 |
| Unigene92484 | Potri.007G027600.2 | 5.3618 | 0 | 12.3885 | Up | 2.19E-20 | 9.87E-20 |
| Unigene88079 | Potri.002G068900.1 | 5.3611 | 0 | 12.3883 | Up | 4.11E-14 | 1.44E-13 |
| Unigene93236 | Potri.005G020000.2 | 5.3576 | 0 | 12.3874 | Up | 3.08E-23 | 1.53E-22 |
| Unigene72994 | Potri.010G216100.1 | 5.354  | 0 | 12.3864 | Up | 2.89E-09 | 7.91E-09 |
| Unigene64627 | Potri.001G056500.2 | 5.3529 | 0 | 12.3861 | Up | 1.63E-27 | 9.20E-27 |
| Unigene75859 | Potri.001G122200.3 | 5.3524 | 0 | 12.386  | Up | 7.78E-10 | 2.20E-09 |
| Unigene63254 | Potri.001G007700.1 | 5.3513 | 0 | 12.3857 | Up | 8.14E-20 | 3.60E-19 |
| Unigene80962 | Potri.013G047400.2 | 5.3497 | 0 | 12.3852 | Up | 5.63E-11 | 1.70E-10 |
| Unigene83695 | Potri.016G089900.1 | 5.3481 | 0 | 12.3848 | Up | 7.85E-12 | 2.47E-11 |
| Unigene68342 | Potri.017G013500.1 | 5.3469 | 0 | 12.3845 | Up | 2.23E-24 | 1.15E-23 |
| Unigene63654 | Potri.010G226000.5 | 5.3448 | 0 | 12.3839 | Up | 4.11E-14 | 1.44E-13 |
| Unigene88153 | Potri.009G141300.4 | 5.3448 | 0 | 12.3839 | Up | 4.11E-14 | 1.44E-13 |
| Unigene94179 | Potri.T069600.1    | 5.3421 | 0 | 12.3832 | Up | 1.20E-32 | 7.84E-32 |
| Unigene94363 | Potri.010G238200.1 | 5.3285 | 0 | 12.3795 | Up | 6.39E-39 | 4.88E-38 |
| Unigene85283 | Potri.005G225700.3 | 5.3285 | 0 | 12.3795 | Up | 2.11E-12 | 6.83E-12 |
| Unigene89487 | Potri.003G202600.1 | 5.3285 | 0 | 12.3795 | Up | 2.97E-15 | 1.09E-14 |
| Unigene61781 | Potri.017G105300.2 | 5.3086 | 0 | 12.3741 | Up | 1.51E-11 | 4.70E-11 |
| Unigene53949 | Potri.005G093500.1 | 5.3086 | 0 | 12.3741 | Up | 1.51E-11 | 4.70E-11 |
| Unigene54140 | Potri.018G081800.5 | 5.3068 | 0 | 12.3736 | Up | 1.09E-10 | 3.22E-10 |
| Unigene75096 | Potri.008G147000.1 | 5.2798 | 0 | 12.3663 | Up | 1.50E-09 | 4.17E-09 |
| Unigene65164 | Potri.001G306400.1 | 5.2777 | 0 | 12.3657 | Up | 4.34E-26 | 2.35E-25 |
| Unigene94486 | Potri.017G075000.2 | 5.2767 | 0 | 12.3654 | Up | 1.33E-54 | 1.42E-53 |
| Unigene64466 | Potri.014G128400.2 | 5.2765 | 0 | 12.3654 | Up | 1.61E-25 | 8.58E-25 |
| Unigene60255 | Potri.001G437300.1 | 5.272  | 0 | 12.3641 | Up | 4.07E-12 | 1.30E-11 |
| Unigene68806 | Potri.014G116600.3 | 5.2677 | 0 | 12.363  | Up | 1.28E-46 | 1.16E-45 |
| Unigene70276 | Potri.001G256200.1 | 5.2665 | 0 | 12.3626 | Up | 6.00E-25 | 3.14E-24 |
| Unigene62399 | Potri.017G028500.2 | 5.2658 | 0 | 12.3624 | Up | 5.63E-11 | 1.70E-10 |

|              |                    |        |   |         |    |          |          |
|--------------|--------------------|--------|---|---------|----|----------|----------|
| Unigene61770 | Potri.015G093700.1 | 5.2567 | 0 | 12.3599 | Up | 1.72E-39 | 1.33E-38 |
| Unigene72187 | Potri.T134400.1    | 5.2509 | 0 | 12.3583 | Up | 5.58E-09 | 1.50E-08 |
| Unigene61673 | Potri.002G196300.1 | 5.2394 | 0 | 12.3552 | Up | 1.10E-12 | 3.59E-12 |
| Unigene85130 | Potri.016G053000.1 | 5.235  | 0 | 12.354  | Up | 4.07E-12 | 1.30E-11 |
| Unigene76814 | Potri.014G113200.2 | 5.235  | 0 | 12.354  | Up | 7.78E-10 | 2.20E-09 |
| Unigene92241 | Potri.009G054200.2 | 5.2252 | 0 | 12.3513 | Up | 3.03E-19 | 1.31E-18 |
| Unigene65387 | Potri.008G157500.2 | 5.2198 | 0 | 12.3498 | Up | 2.13E-14 | 7.57E-14 |
| Unigene93651 | Potri.002G087200.2 | 5.2159 | 0 | 12.3487 | Up | 3.11E-25 | 1.64E-24 |
| Unigene79838 | Potri.005G048700.4 | 5.1975 | 0 | 12.3436 | Up | 2.09E-10 | 6.11E-10 |
| Unigene93362 | Potri.006G136400.7 | 5.1969 | 0 | 12.3434 | Up | 3.08E-23 | 1.53E-22 |
| Unigene58470 | Potri.010G063300.1 | 5.1965 | 0 | 12.3433 | Up | 1.53E-13 | 5.23E-13 |
| Unigene83041 | Potri.015G086400.1 | 5.1883 | 0 | 12.341  | Up | 2.92E-11 | 8.93E-11 |
| Unigene78772 | Potri.008G195100.3 | 5.1718 | 0 | 12.3365 | Up | 4.04E-10 | 1.16E-09 |
| Unigene91811 | Potri.019G054500.1 | 5.1711 | 0 | 12.3363 | Up | 4.19E-18 | 1.74E-17 |
| Unigene86014 | Potri.003G171200.3 | 5.1665 | 0 | 12.335  | Up | 2.11E-12 | 6.83E-12 |
| Unigene69415 | Potri.002G089900.1 | 5.1543 | 0 | 12.3316 | Up | 3.14E-27 | 1.76E-26 |
| Unigene65299 | Potri.016G139100.3 | 5.1525 | 0 | 12.3311 | Up | 7.92E-14 | 2.74E-13 |
| Unigene78937 | Potri.001G330000.1 | 5.1501 | 0 | 12.3304 | Up | 4.04E-10 | 1.16E-09 |
| Unigene62440 | Potri.005G170500.4 | 5.1477 | 0 | 12.3297 | Up | 4.19E-18 | 1.74E-17 |
| Unigene64698 | Potri.008G159000.1 | 5.1425 | 0 | 12.3283 | Up | 3.08E-23 | 1.53E-22 |
| Unigene90731 | Potri.006G134300.1 | 5.1382 | 0 | 12.327  | Up | 4.15E-16 | 1.59E-15 |
| Unigene88465 | Potri.001G394000.4 | 5.1371 | 0 | 12.3267 | Up | 7.92E-14 | 2.74E-13 |
| Unigene90279 | Potri.015G012100.1 | 5.1312 | 0 | 12.3251 | Up | 1.54E-15 | 5.75E-15 |
| Unigene83385 | Potri.007G134600.3 | 5.1304 | 0 | 12.3249 | Up | 2.92E-11 | 8.93E-11 |
| Unigene77861 | Potri.001G281300.1 | 5.1227 | 0 | 12.3227 | Up | 7.78E-10 | 2.20E-09 |
| Unigene67889 | Potri.009G053900.1 | 5.1131 | 0 | 12.32   | Up | 2.40E-40 | 1.90E-39 |
| Unigene68740 | Potri.006G101900.1 | 5.1065 | 0 | 12.3181 | Up | 7.92E-14 | 2.74E-13 |
| Unigene81729 | Potri.001G186700.1 | 5.0995 | 0 | 12.3161 | Up | 1.09E-10 | 3.22E-10 |
| Unigene84380 | Potri.014G069200.2 | 5.0985 | 0 | 12.3159 | Up | 1.51E-11 | 4.70E-11 |
| Unigene64516 | Potri.016G114500.6 | 5.0968 | 0 | 12.3154 | Up | 2.95E-13 | 9.94E-13 |
| Unigene60651 | Potri.002G126100.1 | 5.0949 | 0 | 12.3148 | Up | 6.39E-39 | 4.89E-38 |
| Unigene67016 | Potri.010G166100.6 | 5.0863 | 0 | 12.3124 | Up | 4.04E-10 | 1.16E-09 |
| Unigene55797 | Potri.006G233800.1 | 5.0863 | 0 | 12.3124 | Up | 1.16E-24 | 5.99E-24 |
| Unigene82972 | Potri.019G078700.1 | 5.0671 | 0 | 12.3069 | Up | 5.63E-11 | 1.70E-10 |
| Unigene93512 | Potri.016G126400.1 | 5.0662 | 0 | 12.3067 | Up | 1.60E-23 | 7.98E-23 |
| Unigene70366 | Potri.002G017700.1 | 5.0637 | 0 | 12.306  | Up | 1.20E-32 | 7.84E-32 |
| Unigene93419 | Potri.002G188800.1 | 5.0598 | 0 | 12.3049 | Up | 5.95E-23 | 2.91E-22 |
| Unigene74042 | Potri.012G114700.1 | 5.0546 | 0 | 12.3034 | Up | 5.58E-09 | 1.50E-08 |

|              |                    |        |   |         |    |          |          |
|--------------|--------------------|--------|---|---------|----|----------|----------|
| Unigene80860 | Potri.007G144600.2 | 5.0525 | 0 | 12.3028 | Up | 2.09E-10 | 6.11E-10 |
| Unigene69726 | Potri.015G069700.1 | 5.0521 | 0 | 12.3027 | Up | 6.45E-41 | 5.17E-40 |
| Unigene77118 | Potri.009G054600.1 | 5.0493 | 0 | 12.3019 | Up | 1.50E-09 | 4.17E-09 |
| Unigene72406 | Potri.001G013300.1 | 5.0453 | 0 | 12.3007 | Up | 1.08E-08 | 2.84E-08 |
| Unigene91902 | Potri.002G104700.2 | 5.0405 | 0 | 12.2994 | Up | 8.07E-18 | 3.31E-17 |
| Unigene90303 | Potri.013G023100.1 | 5.0325 | 0 | 12.2971 | Up | 2.97E-15 | 1.09E-14 |
| Unigene54915 | Potri.004G185500.1 | 5.0305 | 0 | 12.2965 | Up | 2.11E-12 | 6.84E-12 |
| Unigene61205 | Potri.015G070500.1 | 5.0273 | 0 | 12.2956 | Up | 1.50E-09 | 4.17E-09 |
| Unigene54508 | Potri.014G171600.1 | 5.0262 | 0 | 12.2953 | Up | 1.51E-11 | 4.70E-11 |
| Unigene90530 | Potri.009G027500.1 | 5.0248 | 0 | 12.2949 | Up | 1.54E-15 | 5.75E-15 |
| Unigene54173 | Potri.002G012900.1 | 5.0151 | 0 | 12.2921 | Up | 7.78E-10 | 2.20E-09 |
| Unigene68811 | Potri.001G155500.5 | 5.0121 | 0 | 12.2912 | Up | 5.68E-13 | 1.89E-12 |
| Unigene91228 | Potri.010G111500.1 | 5.0036 | 0 | 12.2888 | Up | 2.15E-16 | 8.32E-16 |
| Unigene93604 | Potri.002G160300.3 | 4.9938 | 0 | 12.2859 | Up | 8.29E-24 | 4.18E-23 |
| Unigene63878 | Potri.010G053600.2 | 4.9891 | 0 | 12.2846 | Up | 1.13E-18 | 4.77E-18 |
| Unigene88938 | Potri.010G215000.4 | 4.9877 | 0 | 12.2842 | Up | 7.92E-14 | 2.74E-13 |
| Unigene92262 | Potri.016G018800.1 | 4.9733 | 0 | 12.28   | Up | 2.17E-18 | 9.10E-18 |
| Unigene83458 | Potri.001G233400.1 | 4.9733 | 0 | 12.28   | Up | 5.63E-11 | 1.70E-10 |
| Unigene93756 | Potri.005G008300.2 | 4.9694 | 0 | 12.2789 | Up | 6.00E-25 | 3.14E-24 |
| Unigene67155 | Potri.004G202200.1 | 4.9668 | 0 | 12.2781 | Up | 8.52E-30 | 5.14E-29 |
| Unigene67991 | Potri.004G236000.1 | 4.9549 | 0 | 12.2746 | Up | 5.63E-11 | 1.70E-10 |
| Unigene68547 | Potri.004G185900.1 | 4.9543 | 0 | 12.2745 | Up | 1.77E-45 | 1.57E-44 |
| Unigene89366 | Potri.008G046200.3 | 4.9522 | 0 | 12.2739 | Up | 4.11E-14 | 1.44E-13 |
| Unigene94385 | Potri.006G132800.1 | 4.9502 | 0 | 12.2733 | Up | 1.70E-37 | 1.26E-36 |
| Unigene83702 | Potri.004G041600.1 | 4.9367 | 0 | 12.2693 | Up | 5.63E-11 | 1.70E-10 |
| Unigene92205 | Potri.013G153000.1 | 4.9355 | 0 | 12.269  | Up | 4.19E-18 | 1.74E-17 |
| Unigene57858 | Potri.015G106500.1 | 4.935  | 0 | 12.2688 | Up | 5.68E-13 | 1.89E-12 |
| Unigene76673 | Potri.001G348500.2 | 4.9295 | 0 | 12.2672 | Up | 2.89E-09 | 7.91E-09 |
| Unigene73635 | Potri.002G010200.1 | 4.9264 | 0 | 12.2663 | Up | 1.08E-08 | 2.84E-08 |
| Unigene80693 | Potri.006G246800.1 | 4.9235 | 0 | 12.2655 | Up | 4.04E-10 | 1.16E-09 |
| Unigene94371 | Potri.002G163700.1 | 4.9234 | 0 | 12.2654 | Up | 2.36E-36 | 1.69E-35 |
| Unigene67631 | Potri.018G119400.1 | 4.9186 | 0 | 12.264  | Up | 8.07E-18 | 3.31E-17 |
| Unigene86626 | Potri.014G098600.2 | 4.9078 | 0 | 12.2609 | Up | 4.07E-12 | 1.30E-11 |
| Unigene65920 | Potri.005G174200.1 | 4.9078 | 0 | 12.2609 | Up | 1.53E-13 | 5.23E-13 |
| Unigene83053 | Potri.003G088700.1 | 4.9078 | 0 | 12.2609 | Up | 1.09E-10 | 3.22E-10 |
| Unigene62900 | Potri.014G160400.5 | 4.8998 | 0 | 12.2585 | Up | 1.60E-23 | 7.98E-23 |
| Unigene57492 | Potri.014G030800.1 | 4.8992 | 0 | 12.2583 | Up | 7.20E-65 | 9.32E-64 |
| Unigene65295 | Potri.007G098900.4 | 4.8967 | 0 | 12.2576 | Up | 8.29E-24 | 4.18E-23 |



|              |                    |        |   |         |    |          |          |
|--------------|--------------------|--------|---|---------|----|----------|----------|
| Unigene82286 | Potri.005G207700.2 | 4.8776 | 0 | 12.252  | Up | 2.09E-10 | 6.11E-10 |
| Unigene67450 | Potri.006G024300.3 | 4.8751 | 0 | 12.2512 | Up | 3.38E-43 | 2.85E-42 |
| Unigene68398 | Potri.016G009300.1 | 4.87   | 0 | 12.2497 | Up | 2.95E-13 | 9.94E-13 |
| Unigene54224 | Potri.005G153700.1 | 4.8692 | 0 | 12.2495 | Up | 8.00E-16 | 3.02E-15 |
| Unigene88276 | Potri.014G081300.3 | 4.8602 | 0 | 12.2468 | Up | 5.68E-13 | 1.89E-12 |
| Unigene54465 | Potri.003G173900.2 | 4.8594 | 0 | 12.2466 | Up | 2.92E-11 | 8.94E-11 |
| Unigene68598 | Potri.015G005800.1 | 4.8576 | 0 | 12.246  | Up | 1.16E-24 | 5.99E-24 |
| Unigene74392 | Potri.006G200200.1 | 4.8576 | 0 | 12.246  | Up | 1.08E-08 | 2.84E-08 |
| Unigene91766 | Potri.009G099400.1 | 4.8541 | 0 | 12.245  | Up | 5.79E-17 | 2.29E-16 |
| Unigene75811 | Potri.017G114500.2 | 4.8506 | 0 | 12.2439 | Up | 5.58E-09 | 1.50E-08 |
| Unigene89703 | Potri.002G158100.1 | 4.8428 | 0 | 12.2416 | Up | 4.11E-14 | 1.44E-13 |
| Unigene60432 | Potri.002G192500.1 | 4.8375 | 0 | 12.24   | Up | 1.51E-11 | 4.70E-11 |
| Unigene92227 | Potri.012G061400.1 | 4.8336 | 0 | 12.2389 | Up | 8.07E-18 | 3.31E-17 |
| Unigene65867 | Potri.014G147900.3 | 4.8297 | 0 | 12.2377 | Up | 2.23E-24 | 1.15E-23 |
| Unigene77626 | Potri.001G029900.1 | 4.8232 | 0 | 12.2358 | Up | 2.89E-09 | 7.91E-09 |
| Unigene63914 | Potri.001G226400.3 | 4.8091 | 0 | 12.2316 | Up | 2.11E-12 | 6.84E-12 |
| Unigene76279 | Potri.018G126300.1 | 4.8075 | 0 | 12.2311 | Up | 5.58E-09 | 1.50E-08 |
| Unigene90601 | Potri.010G153500.1 | 4.8066 | 0 | 12.2308 | Up | 5.73E-15 | 2.09E-14 |
| Unigene71212 | Potri.007G065500.4 | 4.8009 | 0 | 12.2291 | Up | 4.00E-08 | 1.02E-07 |
| Unigene83748 | Potri.014G125500.4 | 4.7996 | 0 | 12.2287 | Up | 1.09E-10 | 3.22E-10 |
| Unigene87608 | Potri.014G123000.1 | 4.794  | 0 | 12.227  | Up | 2.11E-12 | 6.83E-12 |
| Unigene76407 | Potri.010G048100.1 | 4.7862 | 0 | 12.2247 | Up | 5.58E-09 | 1.50E-08 |
| Unigene69919 | Potri.003G088400.1 | 4.7798 | 0 | 12.2227 | Up | 1.12E-16 | 4.37E-16 |
| Unigene57253 | Potri.008G176300.2 | 4.7762 | 0 | 12.2216 | Up | 1.16E-24 | 5.99E-24 |
| Unigene85426 | Potri.006G062900.5 | 4.7754 | 0 | 12.2214 | Up | 2.92E-11 | 8.93E-11 |
| Unigene57059 | Potri.010G192600.6 | 4.7709 | 0 | 12.22   | Up | 4.04E-10 | 1.16E-09 |
| Unigene69292 | Potri.012G096300.1 | 4.7689 | 0 | 12.2194 | Up | 1.12E-16 | 4.37E-16 |
| Unigene83965 | Potri.008G209000.1 | 4.7645 | 0 | 12.2181 | Up | 1.09E-10 | 3.22E-10 |
| Unigene94457 | Potri.013G010800.2 | 4.763  | 0 | 12.2177 | Up | 6.51E-43 | 5.46E-42 |
| Unigene91783 | Potri.008G069500.2 | 4.758  | 0 | 12.2161 | Up | 1.12E-16 | 4.37E-16 |
| Unigene67657 | Potri.004G059100.1 | 4.7494 | 0 | 12.2135 | Up | 8.68E-34 | 5.83E-33 |
| Unigene87882 | Potri.002G090700.4 | 4.7346 | 0 | 12.209  | Up | 2.11E-12 | 6.83E-12 |
| Unigene76998 | Potri.009G114900.1 | 4.7235 | 0 | 12.2056 | Up | 5.58E-09 | 1.50E-08 |
| Unigene65279 | Potri.009G038500.1 | 4.7198 | 0 | 12.2045 | Up | 3.06E-21 | 1.42E-20 |
| Unigene82413 | Potri.008G058000.1 | 4.716  | 0 | 12.2033 | Up | 4.04E-10 | 1.16E-09 |
| Unigene89479 | Potri.010G082500.1 | 4.7148 | 0 | 12.203  | Up | 1.53E-13 | 5.22E-13 |
| Unigene86368 | Potri.002G196300.1 | 4.7089 | 0 | 12.2012 | Up | 1.51E-11 | 4.70E-11 |
| Unigene69725 | Potri.008G101500.2 | 4.7086 | 0 | 12.2011 | Up | 2.97E-15 | 1.10E-14 |

|              |                    |        |   |         |    |          |          |
|--------------|--------------------|--------|---|---------|----|----------|----------|
| Unigene72337 | Potri.010G226000.5 | 4.7077 | 0 | 12.2008 | Up | 4.00E-08 | 1.02E-07 |
| Unigene72326 | Potri.009G080800.3 | 4.7077 | 0 | 12.2008 | Up | 4.00E-08 | 1.02E-07 |
| Unigene87524 | Potri.001G264400.1 | 4.7066 | 0 | 12.2005 | Up | 4.07E-12 | 1.30E-11 |
| Unigene68745 | Potri.015G086400.1 | 4.7039 | 0 | 12.1996 | Up | 5.89E-21 | 2.71E-20 |
| Unigene93710 | Potri.014G095200.1 | 4.6996 | 0 | 12.1983 | Up | 3.08E-23 | 1.53E-22 |
| Unigene85148 | Potri.012G001500.1 | 4.695  | 0 | 12.1969 | Up | 5.63E-11 | 1.70E-10 |
| Unigene88488 | Potri.014G109500.1 | 4.6904 | 0 | 12.1955 | Up | 1.10E-12 | 3.59E-12 |
| Unigene65519 | Potri.003G119100.1 | 4.6904 | 0 | 12.1955 | Up | 1.10E-12 | 3.59E-12 |
| Unigene72449 | Potri.003G129500.1 | 4.685  | 0 | 12.1938 | Up | 4.00E-08 | 1.02E-07 |
| Unigene78783 | Potri.002G013500.1 | 4.682  | 0 | 12.1929 | Up | 2.89E-09 | 7.91E-09 |
| Unigene91667 | Potri.T059500.1    | 4.6624 | 0 | 12.1869 | Up | 4.15E-16 | 1.59E-15 |
| Unigene72686 | Potri.T025000.1    | 4.6624 | 0 | 12.1869 | Up | 4.00E-08 | 1.02E-07 |
| Unigene68438 | Potri.008G149900.2 | 4.6532 | 0 | 12.184  | Up | 1.13E-18 | 4.77E-18 |
| Unigene67266 | Potri.013G142200.1 | 4.6495 | 0 | 12.1829 | Up | 1.53E-13 | 5.23E-13 |
| Unigene67300 | Potri.014G095700.2 | 4.6456 | 0 | 12.1816 | Up | 2.19E-20 | 9.88E-20 |
| Unigene67675 | Potri.016G102000.1 | 4.6448 | 0 | 12.1814 | Up | 1.57E-19 | 6.87E-19 |
| Unigene79277 | Potri.005G223800.4 | 4.6431 | 0 | 12.1809 | Up | 2.89E-09 | 7.91E-09 |
| Unigene54320 | Potri.017G009600.1 | 4.6401 | 0 | 12.1799 | Up | 4.00E-08 | 1.02E-07 |
| Unigene58225 | Potri.003G164600.1 | 4.6297 | 0 | 12.1767 | Up | 8.00E-16 | 3.02E-15 |
| Unigene66889 | Potri.019G038900.1 | 4.6267 | 0 | 12.1758 | Up | 8.29E-24 | 4.18E-23 |
| Unigene80742 | Potri.005G159500.1 | 4.6251 | 0 | 12.1753 | Up | 1.50E-09 | 4.17E-09 |
| Unigene78059 | Potri.017G126200.1 | 4.6226 | 0 | 12.1745 | Up | 5.58E-09 | 1.50E-08 |
| Unigene93012 | Potri.006G258100.7 | 4.618  | 0 | 12.1731 | Up | 3.03E-19 | 1.31E-18 |
| Unigene54036 | Potri.001G400800.1 | 4.6094 | 0 | 12.1704 | Up | 2.21E-22 | 1.06E-21 |
| Unigene91752 | Potri.003G082600.1 | 4.6091 | 0 | 12.1703 | Up | 4.15E-16 | 1.59E-15 |
| Unigene68429 | Potri.010G214900.1 | 4.6036 | 0 | 12.1685 | Up | 8.37E-26 | 4.49E-25 |
| Unigene90646 | Potri.006G281400.2 | 4.6025 | 0 | 12.1682 | Up | 2.13E-14 | 7.56E-14 |
| Unigene71387 | Potri.019G095300.1 | 4.5935 | 0 | 12.1654 | Up | 7.71E-08 | 1.93E-07 |
| Unigene57496 | Potri.014G101400.1 | 4.5935 | 0 | 12.1654 | Up | 7.71E-08 | 1.93E-07 |
| Unigene89562 | Potri.017G036100.1 | 4.5843 | 0 | 12.1625 | Up | 2.95E-13 | 9.94E-13 |
| Unigene64181 | Potri.014G029000.2 | 4.5806 | 0 | 12.1613 | Up | 1.10E-12 | 3.59E-12 |
| Unigene93787 | Potri.001G002600.1 | 4.5685 | 0 | 12.1575 | Up | 3.08E-23 | 1.52E-22 |
| Unigene73811 | Potri.010G066500.1 | 4.553  | 0 | 12.1526 | Up | 4.00E-08 | 1.02E-07 |
| Unigene60339 | Potri.009G144500.1 | 4.547  | 0 | 12.1507 | Up | 5.84E-19 | 2.50E-18 |
| Unigene93971 | Potri.010G000800.1 | 4.5422 | 0 | 12.1492 | Up | 6.00E-25 | 3.14E-24 |
| Unigene58165 | Potri.013G045100.1 | 4.539  | 0 | 12.1482 | Up | 9.59E-56 | 1.05E-54 |
| Unigene80213 | Potri.016G101900.1 | 4.5303 | 0 | 12.1454 | Up | 2.89E-09 | 7.91E-09 |
| Unigene62712 | Potri.005G208300.1 | 4.5292 | 0 | 12.145  | Up | 2.97E-15 | 1.10E-14 |

|              |                    |        |   |         |    |          |          |
|--------------|--------------------|--------|---|---------|----|----------|----------|
| Unigene86723 | Potri.014G159000.1 | 4.5249 | 0 | 12.1437 | Up | 2.92E-11 | 8.93E-11 |
| Unigene81750 | Potri.010G081800.2 | 4.5167 | 0 | 12.1411 | Up | 1.50E-09 | 4.17E-09 |
| Unigene54112 | Potri.008G160200.1 | 4.511  | 0 | 12.1392 | Up | 8.14E-20 | 3.60E-19 |
| Unigene82927 | Potri.010G211100.1 | 4.5041 | 0 | 12.137  | Up | 7.78E-10 | 2.20E-09 |
| Unigene84802 | Potri.015G053300.1 | 4.4971 | 0 | 12.1348 | Up | 2.09E-10 | 6.11E-10 |
| Unigene84828 | Potri.006G139400.1 | 4.4971 | 0 | 12.1348 | Up | 2.09E-10 | 6.11E-10 |
| Unigene64312 | Potri.005G007500.1 | 4.4879 | 0 | 12.1318 | Up | 1.53E-13 | 5.23E-13 |
| Unigene65228 | Potri.002G214100.3 | 4.4877 | 0 | 12.1318 | Up | 4.19E-18 | 1.74E-17 |
| Unigene91540 | Potri.014G153400.2 | 4.4759 | 0 | 12.128  | Up | 2.97E-15 | 1.09E-14 |
| Unigene55661 | Potri.005G106800.1 | 4.4716 | 0 | 12.1266 | Up | 2.11E-12 | 6.84E-12 |
| Unigene55086 | Potri.016G119900.4 | 4.4537 | 0 | 12.1208 | Up | 7.78E-10 | 2.20E-09 |
| Unigene70989 | Potri.003G006500.3 | 4.4537 | 0 | 12.1208 | Up | 1.49E-07 | 3.64E-07 |
| Unigene94123 | Potri.008G091400.1 | 4.4522 | 0 | 12.1203 | Up | 2.25E-26 | 1.23E-25 |
| Unigene79557 | Potri.014G043300.5 | 4.4514 | 0 | 12.12   | Up | 5.58E-09 | 1.50E-08 |
| Unigene74861 | Potri.002G003100.5 | 4.4486 | 0 | 12.1191 | Up | 4.00E-08 | 1.02E-07 |
| Unigene73176 | Potri.011G101700.1 | 4.4404 | 0 | 12.1165 | Up | 7.71E-08 | 1.93E-07 |
| Unigene71192 | Potri.001G123500.1 | 4.4316 | 0 | 12.1136 | Up | 1.49E-07 | 3.64E-07 |
| Unigene84344 | Potri.003G145100.1 | 4.4276 | 0 | 12.1123 | Up | 4.04E-10 | 1.16E-09 |
| Unigene91795 | Potri.016G139600.1 | 4.4182 | 0 | 12.1092 | Up | 1.54E-15 | 5.75E-15 |
| Unigene86635 | Potri.006G214800.1 | 4.4171 | 0 | 12.1089 | Up | 5.63E-11 | 1.70E-10 |
| Unigene90348 | Potri.001G294700.1 | 4.4171 | 0 | 12.1089 | Up | 1.53E-13 | 5.22E-13 |
| Unigene79946 | Potri.018G135400.1 | 4.415  | 0 | 12.1082 | Up | 5.58E-09 | 1.50E-08 |
| Unigene84516 | Potri.013G035500.2 | 4.4118 | 0 | 12.1072 | Up | 4.04E-10 | 1.16E-09 |
| Unigene90078 | Potri.011G134800.1 | 4.4118 | 0 | 12.1072 | Up | 2.95E-13 | 9.94E-13 |
| Unigene67292 | Potri.001G005100.1 | 4.3914 | 0 | 12.1005 | Up | 8.29E-24 | 4.18E-23 |
| Unigene61604 | Potri.002G013500.1 | 4.3882 | 0 | 12.0994 | Up | 7.78E-10 | 2.20E-09 |
| Unigene94213 | Potri.017G125100.1 | 4.3827 | 0 | 12.0976 | Up | 1.63E-27 | 9.19E-27 |
| Unigene60039 | Potri.006G218200.1 | 4.3776 | 0 | 12.0959 | Up | 1.58E-21 | 7.42E-21 |
| Unigene65351 | Potri.001G220900.1 | 4.3755 | 0 | 12.0952 | Up | 4.19E-18 | 1.74E-17 |
| Unigene64650 | Potri.016G103800.2 | 4.3736 | 0 | 12.0946 | Up | 8.00E-16 | 3.02E-15 |
| Unigene92046 | Potri.007G025900.1 | 4.3736 | 0 | 12.0946 | Up | 8.00E-16 | 3.02E-15 |
| Unigene81672 | Potri.002G203500.1 | 4.371  | 0 | 12.0937 | Up | 2.89E-09 | 7.91E-09 |
| Unigene88403 | Potri.001G013300.1 | 4.3684 | 0 | 12.0929 | Up | 7.85E-12 | 2.47E-11 |
| Unigene64337 | Potri.003G150000.1 | 4.3648 | 0 | 12.0917 | Up | 2.95E-13 | 9.94E-13 |
| Unigene64963 | Potri.002G123700.1 | 4.3569 | 0 | 12.0891 | Up | 2.11E-12 | 6.84E-12 |
| Unigene64347 | Potri.010G254100.1 | 4.354  | 0 | 12.0881 | Up | 8.07E-18 | 3.31E-17 |
| Unigene75936 | Potri.019G111500.1 | 4.3488 | 0 | 12.0864 | Up | 4.00E-08 | 1.02E-07 |
| Unigene66419 | Potri.010G039900.1 | 4.3484 | 0 | 12.0863 | Up | 1.53E-13 | 5.23E-13 |

|              |                    |        |   |         |    |          |          |
|--------------|--------------------|--------|---|---------|----|----------|----------|
| Unigene93240 | Potri.004G137100.2 | 4.3403 | 0 | 12.0836 | Up | 5.84E-19 | 2.50E-18 |
| Unigene74192 | Potri.001G090500.2 | 4.3372 | 0 | 12.0825 | Up | 7.71E-08 | 1.93E-07 |
| Unigene79314 | Potri.002G032500.1 | 4.3336 | 0 | 12.0814 | Up | 1.08E-08 | 2.84E-08 |
| Unigene63929 | Potri.010G203700.1 | 4.3246 | 0 | 12.0784 | Up | 1.12E-16 | 4.37E-16 |
| Unigene90018 | Potri.006G251000.1 | 4.3231 | 0 | 12.0779 | Up | 5.68E-13 | 1.89E-12 |
| Unigene68176 | Potri.001G332600.1 | 4.3128 | 0 | 12.0744 | Up | 8.22E-22 | 3.88E-21 |
| Unigene72639 | Potri.012G014100.1 | 4.3038 | 0 | 12.0714 | Up | 1.49E-07 | 3.64E-07 |
| Unigene69535 | Potri.001G274300.1 | 4.2974 | 0 | 12.0692 | Up | 5.95E-23 | 2.92E-22 |
| Unigene76541 | Potri.002G138800.1 | 4.2911 | 0 | 12.0671 | Up | 4.00E-08 | 1.02E-07 |
| Unigene91574 | Potri.011G044000.1 | 4.2803 | 0 | 12.0635 | Up | 1.11E-14 | 3.97E-14 |
| Unigene64074 | Potri.003G067900.2 | 4.2775 | 0 | 12.0626 | Up | 7.71E-08 | 1.93E-07 |
| Unigene70114 | Potri.002G214100.3 | 4.2757 | 0 | 12.0619 | Up | 8.76E-36 | 6.20E-35 |
| Unigene87867 | Potri.008G016600.1 | 4.2727 | 0 | 12.0609 | Up | 2.92E-11 | 8.93E-11 |
| Unigene82563 | Potri.008G064800.2 | 4.2709 | 0 | 12.0603 | Up | 2.89E-09 | 7.91E-09 |
| Unigene57802 | Potri.009G079700.1 | 4.2667 | 0 | 12.0589 | Up | 1.50E-09 | 4.17E-09 |
| Unigene67836 | Potri.007G055500.1 | 4.2574 | 0 | 12.0558 | Up | 8.14E-20 | 3.60E-19 |
| Unigene93492 | Potri.006G233300.1 | 4.2574 | 0 | 12.0558 | Up | 8.14E-20 | 3.60E-19 |
| Unigene68048 | Potri.006G015800.1 | 4.257  | 0 | 12.0556 | Up | 1.13E-18 | 4.77E-18 |
| Unigene83756 | Potri.015G056700.1 | 4.2511 | 0 | 12.0536 | Up | 1.50E-09 | 4.17E-09 |
| Unigene59865 | Potri.017G028600.1 | 4.2508 | 0 | 12.0535 | Up | 2.31E-32 | 1.50E-31 |
| Unigene93129 | Potri.006G034400.1 | 4.2449 | 0 | 12.0515 | Up | 4.19E-18 | 1.74E-17 |
| Unigene66014 | Potri.002G126100.1 | 4.2437 | 0 | 12.0511 | Up | 5.79E-17 | 2.29E-16 |
| Unigene81603 | Potri.018G142900.1 | 4.2419 | 0 | 12.0505 | Up | 5.58E-09 | 1.50E-08 |
| Unigene69926 | Potri.004G124900.1 | 4.2397 | 0 | 12.0497 | Up | 1.16E-24 | 5.99E-24 |
| Unigene66588 | Potri.T005000.1    | 4.2349 | 0 | 12.0481 | Up | 1.54E-15 | 5.75E-15 |
| Unigene88039 | Potri.001G460300.1 | 4.2334 | 0 | 12.0476 | Up | 2.92E-11 | 8.93E-11 |
| Unigene84848 | Potri.001G019100.2 | 4.2326 | 0 | 12.0473 | Up | 7.78E-10 | 2.20E-09 |
| Unigene93663 | Potri.013G105300.4 | 4.2317 | 0 | 12.047  | Up | 1.14E-20 | 5.17E-20 |
| Unigene78684 | Potri.009G147800.1 | 4.2315 | 0 | 12.047  | Up | 2.07E-08 | 5.38E-08 |
| Unigene88546 | Potri.006G178500.1 | 4.231  | 0 | 12.0468 | Up | 1.51E-11 | 4.70E-11 |
| Unigene87017 | Potri.008G007000.1 | 4.2249 | 0 | 12.0447 | Up | 1.09E-10 | 3.22E-10 |
| Unigene67401 | Potri.005G204500.1 | 4.2243 | 0 | 12.0445 | Up | 4.11E-14 | 1.44E-13 |
| Unigene82988 | Potri.015G020500.1 | 4.2226 | 0 | 12.0439 | Up | 2.89E-09 | 7.91E-09 |
| Unigene62129 | Potri.007G126600.2 | 4.2165 | 0 | 12.0418 | Up | 7.85E-12 | 2.47E-11 |
| Unigene59803 | Potri.002G084300.2 | 4.215  | 0 | 12.0413 | Up | 1.58E-21 | 7.42E-21 |
| Unigene89384 | Potri.017G074900.1 | 4.2146 | 0 | 12.0412 | Up | 4.07E-12 | 1.30E-11 |
| Unigene59029 | Potri.010G243200.1 | 4.2146 | 0 | 12.0412 | Up | 4.07E-12 | 1.30E-11 |
| Unigene62893 | Potri.013G036500.3 | 4.2112 | 0 | 12.04   | Up | 1.08E-08 | 2.84E-08 |

|              |                    |        |   |         |    |          |          |
|--------------|--------------------|--------|---|---------|----|----------|----------|
| Unigene80382 | Potri.006G280200.2 | 4.2112 | 0 | 12.04   | Up | 1.08E-08 | 2.84E-08 |
| Unigene81787 | Potri.003G024500.1 | 4.2089 | 0 | 12.0392 | Up | 5.58E-09 | 1.50E-08 |
| Unigene85741 | Potri.019G054900.1 | 4.201  | 0 | 12.0365 | Up | 4.04E-10 | 1.16E-09 |
| Unigene75715 | Potri.004G082200.2 | 4.2004 | 0 | 12.0363 | Up | 7.71E-08 | 1.93E-07 |
| Unigene77359 | Potri.008G005800.1 | 4.1982 | 0 | 12.0356 | Up | 4.00E-08 | 1.02E-07 |
| Unigene65206 | Potri.018G053800.5 | 4.1922 | 0 | 12.0335 | Up | 7.85E-12 | 2.47E-11 |
| Unigene93646 | Potri.006G184900.1 | 4.1916 | 0 | 12.0333 | Up | 2.19E-20 | 9.87E-20 |
| Unigene60929 | Potri.T136900.1    | 4.184  | 0 | 12.0307 | Up | 4.11E-14 | 1.44E-13 |
| Unigene75864 | Potri.005G058200.1 | 4.1816 | 0 | 12.0298 | Up | 7.71E-08 | 1.93E-07 |
| Unigene53993 | Potri.009G141300.4 | 4.176  | 0 | 12.0279 | Up | 8.37E-26 | 4.49E-25 |
| Unigene60832 | Potri.014G014400.1 | 4.1753 | 0 | 12.0277 | Up | 2.89E-09 | 7.92E-09 |
| Unigene84283 | Potri.016G031200.1 | 4.1743 | 0 | 12.0273 | Up | 1.50E-09 | 4.17E-09 |
| Unigene68114 | Potri.014G148000.1 | 4.1701 | 0 | 12.0259 | Up | 5.63E-11 | 1.70E-10 |
| Unigene72372 | Potri.006G124800.1 | 4.1645 | 0 | 12.0239 | Up | 2.87E-07 | 6.88E-07 |
| Unigene65216 | Potri.016G131400.1 | 4.1444 | 0 | 12.0169 | Up | 1.12E-16 | 4.37E-16 |
| Unigene84455 | Potri.016G126700.1 | 4.1444 | 0 | 12.0169 | Up | 1.50E-09 | 4.17E-09 |
| Unigene89268 | Potri.010G023500.5 | 4.1444 | 0 | 12.0169 | Up | 7.85E-12 | 2.47E-11 |
| Unigene84517 | Potri.008G200200.2 | 4.1444 | 0 | 12.0169 | Up | 1.50E-09 | 4.17E-09 |
| Unigene91085 | Potri.008G146800.1 | 4.1444 | 0 | 12.0169 | Up | 1.53E-13 | 5.22E-13 |
| Unigene74567 | Potri.006G257300.2 | 4.1444 | 0 | 12.0169 | Up | 1.49E-07 | 3.64E-07 |
| Unigene69474 | Potri.017G033000.1 | 4.1404 | 0 | 12.0156 | Up | 1.67E-33 | 1.12E-32 |
| Unigene60584 | Potri.002G127100.3 | 4.1318 | 0 | 12.0126 | Up | 1.58E-21 | 7.42E-21 |
| Unigene63881 | Potri.005G079700.4 | 4.128  | 0 | 12.0112 | Up | 1.08E-08 | 2.84E-08 |
| Unigene54089 | Potri.001G220900.1 | 4.1165 | 0 | 12.0072 | Up | 4.30E-24 | 2.19E-23 |
| Unigene85524 | Potri.008G203400.6 | 4.1158 | 0 | 12.007  | Up | 7.78E-10 | 2.20E-09 |
| Unigene62984 | Potri.004G074600.1 | 4.1139 | 0 | 12.0063 | Up | 2.89E-09 | 7.92E-09 |
| Unigene88131 | Potri.014G113500.1 | 4.1064 | 0 | 12.0037 | Up | 5.63E-11 | 1.70E-10 |
| Unigene64319 | Potri.006G104300.1 | 4.1047 | 0 | 12.0031 | Up | 2.87E-07 | 6.89E-07 |
| Unigene70713 | Potri.007G078700.2 | 4.103  | 0 | 12.0025 | Up | 5.53E-07 | 1.30E-06 |
| Unigene85656 | Potri.012G027700.1 | 4.1017 | 0 | 12.002  | Up | 7.78E-10 | 2.20E-09 |
| Unigene70039 | Potri.009G101400.3 | 4.0948 | 0 | 11.9996 | Up | 4.46E-32 | 2.87E-31 |
| Unigene88178 | Potri.011G123700.3 | 4.0939 | 0 | 11.9993 | Up | 5.63E-11 | 1.70E-10 |
| Unigene67546 | Potri.013G022700.2 | 4.0909 | 0 | 11.9982 | Up | 2.97E-15 | 1.10E-14 |
| Unigene76777 | Potri.002G038500.1 | 4.0899 | 0 | 11.9978 | Up | 7.71E-08 | 1.93E-07 |
| Unigene66704 | Potri.012G051800.1 | 4.0883 | 0 | 11.9973 | Up | 4.34E-26 | 2.35E-25 |
| Unigene91776 | Potri.013G023300.1 | 4.0876 | 0 | 11.997  | Up | 2.13E-14 | 7.56E-14 |
| Unigene71023 | Potri.013G096500.1 | 4.0825 | 0 | 11.9952 | Up | 5.53E-07 | 1.30E-06 |
| Unigene82982 | Potri.010G164500.1 | 4.0818 | 0 | 11.995  | Up | 5.58E-09 | 1.50E-08 |

|              |                    |        |   |         |    |          |          |
|--------------|--------------------|--------|---|---------|----|----------|----------|
| Unigene81663 | Potri.008G160200.2 | 4.0796 | 0 | 11.9942 | Up | 1.08E-08 | 2.84E-08 |
| Unigene78598 | Potri.001G097100.1 | 4.0747 | 0 | 11.9925 | Up | 4.00E-08 | 1.02E-07 |
| Unigene89123 | Potri.010G233300.1 | 4.0729 | 0 | 11.9918 | Up | 1.51E-11 | 4.70E-11 |
| Unigene93541 | Potri.012G125800.1 | 4.0611 | 0 | 11.9877 | Up | 3.03E-19 | 1.31E-18 |
| Unigene67880 | Potri.011G016400.1 | 4.0582 | 0 | 11.9866 | Up | 4.22E-20 | 1.89E-19 |
| Unigene67532 | Potri.006G085700.6 | 4.0571 | 0 | 11.9862 | Up | 2.17E-18 | 9.10E-18 |
| Unigene93318 | Potri.005G083800.2 | 4.0557 | 0 | 11.9857 | Up | 4.19E-18 | 1.74E-17 |
| Unigene69920 | Potri.018G034900.2 | 4.0543 | 0 | 11.9852 | Up | 2.25E-26 | 1.23E-25 |
| Unigene87817 | Potri.015G094300.2 | 4.0543 | 0 | 11.9852 | Up | 1.09E-10 | 3.22E-10 |
| Unigene77235 | Potri.009G112300.4 | 4.0543 | 0 | 11.9852 | Up | 7.71E-08 | 1.93E-07 |
| Unigene57360 | Potri.009G122400.1 | 4.0522 | 0 | 11.9845 | Up | 2.23E-24 | 1.15E-23 |
| Unigene70326 | Potri.015G136400.1 | 4.05   | 0 | 11.9837 | Up | 8.29E-24 | 4.18E-23 |
| Unigene66195 | Potri.007G026900.1 | 4.0435 | 0 | 11.9814 | Up | 1.11E-14 | 3.98E-14 |
| Unigene85229 | Potri.009G075700.1 | 4.043  | 0 | 11.9812 | Up | 1.50E-09 | 4.17E-09 |
| Unigene83273 | Potri.010G045300.3 | 4.0361 | 0 | 11.9787 | Up | 5.58E-09 | 1.50E-08 |
| Unigene70095 | Potri.010G078900.1 | 4.0288 | 0 | 11.9761 | Up | 9.08E-44 | 7.76E-43 |
| Unigene90643 | Potri.009G147900.1 | 4.0272 | 0 | 11.9756 | Up | 1.10E-12 | 3.59E-12 |
| Unigene93219 | Potri.012G021600.1 | 4.0232 | 0 | 11.9741 | Up | 1.56E-17 | 6.31E-17 |
| Unigene66885 | Potri.010G202900.1 | 4.0231 | 0 | 11.9741 | Up | 1.14E-20 | 5.17E-20 |
| Unigene70225 | Potri.018G107200.1 | 4.0221 | 0 | 11.9737 | Up | 6.17E-31 | 3.84E-30 |
| Unigene58275 | Potri.005G196600.1 | 4.0169 | 0 | 11.9719 | Up | 1.09E-10 | 3.22E-10 |
| Unigene63801 | Potri.004G072600.1 | 4.0158 | 0 | 11.9715 | Up | 1.56E-17 | 6.31E-17 |
| Unigene75951 | Potri.013G009500.1 | 4.0143 | 0 | 11.9709 | Up | 1.49E-07 | 3.64E-07 |
| Unigene75860 | Potri.011G166400.2 | 4.0143 | 0 | 11.9709 | Up | 1.49E-07 | 3.64E-07 |
| Unigene93151 | Potri.002G114100.1 | 4.0137 | 0 | 11.9707 | Up | 3.00E-17 | 1.20E-16 |
| Unigene80873 | Potri.008G146800.1 | 4.0123 | 0 | 11.9702 | Up | 2.07E-08 | 5.38E-08 |
| Unigene94196 | Potri.T042000.1    | 4.0082 | 0 | 11.9687 | Up | 6.00E-25 | 3.13E-24 |
| Unigene64296 | Potri.006G165300.4 | 4.0029 | 0 | 11.9668 | Up | 2.95E-13 | 9.95E-13 |
| Unigene91197 | Potri.002G194300.1 | 4.0029 | 0 | 11.9668 | Up | 2.95E-13 | 9.94E-13 |
| Unigene90090 | Potri.008G088900.1 | 4      | 0 | 11.9658 | Up | 4.07E-12 | 1.30E-11 |
| Unigene92133 | Potri.006G104300.1 | 3.9993 | 0 | 11.9655 | Up | 1.11E-14 | 3.97E-14 |
| Unigene94232 | Potri.010G059900.1 | 3.9964 | 0 | 11.9645 | Up | 1.61E-25 | 8.57E-25 |
| Unigene91415 | Potri.005G021700.1 | 3.9964 | 0 | 11.9645 | Up | 1.53E-13 | 5.22E-13 |
| Unigene88135 | Potri.009G088100.1 | 3.9923 | 0 | 11.963  | Up | 1.09E-10 | 3.22E-10 |
| Unigene61162 | Potri.014G178200.1 | 3.9912 | 0 | 11.9626 | Up | 2.15E-16 | 8.33E-16 |
| Unigene82620 | Potri.002G099400.2 | 3.9862 | 0 | 11.9608 | Up | 1.08E-08 | 2.84E-08 |
| Unigene77998 | Potri.002G022600.3 | 3.985  | 0 | 11.9604 | Up | 7.71E-08 | 1.93E-07 |
| Unigene72339 | Potri.007G061100.2 | 3.9834 | 0 | 11.9598 | Up | 5.53E-07 | 1.30E-06 |

|              |                    |        |   |         |    |          |          |
|--------------|--------------------|--------|---|---------|----|----------|----------|
| Unigene66650 | Potri.012G118700.1 | 3.9822 | 0 | 11.9593 | Up | 8.07E-18 | 3.31E-17 |
| Unigene84691 | Potri.006G246700.1 | 3.9822 | 0 | 11.9593 | Up | 2.89E-09 | 7.91E-09 |
| Unigene66375 | Potri.002G135700.1 | 3.9822 | 0 | 11.9593 | Up | 2.89E-09 | 7.92E-09 |
| Unigene67344 | Potri.008G215700.1 | 3.9809 | 0 | 11.9589 | Up | 7.92E-14 | 2.74E-13 |
| Unigene76319 | Potri.015G140800.2 | 3.9786 | 0 | 11.958  | Up | 1.49E-07 | 3.64E-07 |
| Unigene76229 | Potri.014G044300.2 | 3.9786 | 0 | 11.958  | Up | 1.49E-07 | 3.64E-07 |
| Unigene87650 | Potri.001G003200.1 | 3.9755 | 0 | 11.9569 | Up | 2.09E-10 | 6.11E-10 |
| Unigene93841 | Potri.013G013500.1 | 3.9741 | 0 | 11.9564 | Up | 1.14E-20 | 5.17E-20 |
| Unigene91486 | Potri.010G004600.1 | 3.968  | 0 | 11.9542 | Up | 1.53E-13 | 5.22E-13 |
| Unigene92344 | Potri.001G243300.1 | 3.968  | 0 | 11.9542 | Up | 5.73E-15 | 2.09E-14 |
| Unigene65697 | Potri.010G202900.3 | 3.9654 | 0 | 11.9533 | Up | 4.38E-28 | 2.52E-27 |
| Unigene86417 | Potri.009G024600.3 | 3.9654 | 0 | 11.9533 | Up | 7.78E-10 | 2.20E-09 |
| Unigene68830 | Potri.003G177700.2 | 3.9631 | 0 | 11.9524 | Up | 2.09E-10 | 6.11E-10 |
| Unigene58655 | Potri.011G165600.1 | 3.9592 | 0 | 11.951  | Up | 5.79E-17 | 2.29E-16 |
| Unigene79912 | Potri.012G039700.2 | 3.9583 | 0 | 11.9507 | Up | 4.00E-08 | 1.02E-07 |
| Unigene89174 | Potri.012G134200.1 | 3.9544 | 0 | 11.9492 | Up | 2.92E-11 | 8.93E-11 |
| Unigene60905 | Potri.001G163200.1 | 3.954  | 0 | 11.9491 | Up | 2.89E-09 | 7.92E-09 |
| Unigene67513 | Potri.016G115600.1 | 3.9516 | 0 | 11.9482 | Up | 2.11E-12 | 6.83E-12 |
| Unigene65613 | Potri.003G202700.1 | 3.9466 | 0 | 11.9464 | Up | 2.97E-15 | 1.10E-14 |
| Unigene66433 | Potri.018G023000.1 | 3.9422 | 0 | 11.9448 | Up | 4.00E-08 | 1.02E-07 |
| Unigene87818 | Potri.013G071800.1 | 3.9385 | 0 | 11.9434 | Up | 2.09E-10 | 6.11E-10 |
| Unigene93156 | Potri.006G187400.1 | 3.9372 | 0 | 11.943  | Up | 5.79E-17 | 2.29E-16 |
| Unigene94347 | Potri.014G166600.1 | 3.9369 | 0 | 11.9428 | Up | 2.27E-28 | 1.31E-27 |
| Unigene93249 | Potri.001G269200.1 | 3.9263 | 0 | 11.939  | Up | 3.00E-17 | 1.20E-16 |
| Unigene75111 | Potri.011G142400.1 | 3.9173 | 0 | 11.9356 | Up | 2.87E-07 | 6.88E-07 |
| Unigene70498 | Potri.004G191000.1 | 3.9165 | 0 | 11.9353 | Up | 1.07E-06 | 2.45E-06 |
| Unigene87910 | Potri.008G069700.1 | 3.9142 | 0 | 11.9345 | Up | 2.09E-10 | 6.11E-10 |
| Unigene85174 | Potri.014G128400.2 | 3.9125 | 0 | 11.9339 | Up | 2.89E-09 | 7.91E-09 |
| Unigene91217 | Potri.006G107300.3 | 3.9119 | 0 | 11.9337 | Up | 5.68E-13 | 1.89E-12 |
| Unigene88942 | Potri.004G073400.1 | 3.9034 | 0 | 11.9305 | Up | 5.63E-11 | 1.70E-10 |
| Unigene91239 | Potri.019G073100.1 | 3.9024 | 0 | 11.9301 | Up | 5.68E-13 | 1.89E-12 |
| Unigene57684 | Potri.010G181100.1 | 3.9006 | 0 | 11.9295 | Up | 7.78E-10 | 2.20E-09 |
| Unigene88044 | Potri.002G198300.2 | 3.8901 | 0 | 11.9256 | Up | 2.09E-10 | 6.11E-10 |
| Unigene92929 | Potri.014G001300.1 | 3.8884 | 0 | 11.925  | Up | 4.15E-16 | 1.59E-15 |
| Unigene61302 | Potri.015G091800.4 | 3.8829 | 0 | 11.9229 | Up | 4.04E-10 | 1.16E-09 |
| Unigene83449 | Potri.019G130700.1 | 3.8825 | 0 | 11.9228 | Up | 1.08E-08 | 2.84E-08 |
| Unigene93868 | Potri.T042500.1    | 3.8819 | 0 | 11.9225 | Up | 2.19E-20 | 9.87E-20 |
| Unigene84533 | Potri.007G000900.3 | 3.877  | 0 | 11.9207 | Up | 5.58E-09 | 1.50E-08 |

|              |                    |        |   |         |    |          |          |
|--------------|--------------------|--------|---|---------|----|----------|----------|
| Unigene92840 | Potri.004G228500.7 | 3.8762 | 0 | 11.9204 | Up | 8.00E-16 | 3.02E-15 |
| Unigene86910 | Potri.016G023000.4 | 3.8753 | 0 | 11.9201 | Up | 7.78E-10 | 2.20E-09 |
| Unigene61655 | Potri.005G067100.1 | 3.8741 | 0 | 11.9196 | Up | 5.68E-13 | 1.89E-12 |
| Unigene69793 | Potri.009G086900.1 | 3.8731 | 0 | 11.9193 | Up | 7.92E-14 | 2.74E-13 |
| Unigene64275 | Potri.011G010700.2 | 3.8612 | 0 | 11.9148 | Up | 5.73E-15 | 2.09E-14 |
| Unigene89106 | Potri.008G090600.1 | 3.8586 | 0 | 11.9139 | Up | 5.63E-11 | 1.70E-10 |
| Unigene65246 | Potri.014G080600.2 | 3.8533 | 0 | 11.9119 | Up | 5.73E-15 | 2.09E-14 |
| Unigene91561 | Potri.001G314600.1 | 3.8525 | 0 | 11.9116 | Up | 2.95E-13 | 9.94E-13 |
| Unigene82487 | Potri.018G030700.4 | 3.8438 | 0 | 11.9083 | Up | 2.07E-08 | 5.38E-08 |
| Unigene86374 | Potri.002G107500.1 | 3.8415 | 0 | 11.9075 | Up | 1.50E-09 | 4.17E-09 |
| Unigene89959 | Potri.010G199500.3 | 3.8411 | 0 | 11.9073 | Up | 1.51E-11 | 4.70E-11 |
| Unigene94133 | Potri.004G086900.1 | 3.8382 | 0 | 11.9062 | Up | 5.95E-23 | 2.91E-22 |
| Unigene87106 | Potri.015G105000.1 | 3.8379 | 0 | 11.9061 | Up | 7.78E-10 | 2.20E-09 |
| Unigene92561 | Potri.007G030900.1 | 3.8374 | 0 | 11.9059 | Up | 5.73E-15 | 2.09E-14 |
| Unigene66625 | Potri.003G164200.1 | 3.8361 | 0 | 11.9054 | Up | 1.63E-27 | 9.20E-27 |
| Unigene57984 | Potri.010G064800.1 | 3.8354 | 0 | 11.9052 | Up | 4.07E-12 | 1.30E-11 |
| Unigene69126 | Potri.004G040500.2 | 3.8314 | 0 | 11.9037 | Up | 2.09E-10 | 6.11E-10 |
| Unigene54347 | Potri.017G147000.1 | 3.8209 | 0 | 11.8997 | Up | 1.07E-06 | 2.45E-06 |
| Unigene55986 | Potri.009G078500.3 | 3.8173 | 0 | 11.8983 | Up | 2.23E-24 | 1.15E-23 |
| Unigene90972 | Potri.018G075300.1 | 3.8137 | 0 | 11.897  | Up | 2.11E-12 | 6.83E-12 |
| Unigene54921 | Potri.013G077900.5 | 3.8116 | 0 | 11.8962 | Up | 1.10E-12 | 3.60E-12 |
| Unigene90055 | Potri.014G169600.2 | 3.8102 | 0 | 11.8957 | Up | 1.51E-11 | 4.70E-11 |
| Unigene63059 | Potri.006G083100.1 | 3.8093 | 0 | 11.8953 | Up | 1.49E-07 | 3.65E-07 |
| Unigene92937 | Potri.013G048100.1 | 3.809  | 0 | 11.8952 | Up | 8.00E-16 | 3.02E-15 |
| Unigene88404 | Potri.005G147900.1 | 3.8084 | 0 | 11.895  | Up | 2.09E-10 | 6.11E-10 |
| Unigene72229 | Potri.003G107400.1 | 3.8024 | 0 | 11.8927 | Up | 1.07E-06 | 2.45E-06 |
| Unigene64870 | Potri.016G104400.1 | 3.799  | 0 | 11.8914 | Up | 4.04E-10 | 1.16E-09 |
| Unigene68020 | Potri.009G090800.1 | 3.7978 | 0 | 11.8909 | Up | 1.08E-08 | 2.84E-08 |
| Unigene93314 | Potri.001G449000.1 | 3.7898 | 0 | 11.8879 | Up | 5.79E-17 | 2.29E-16 |
| Unigene87949 | Potri.001G468200.1 | 3.7873 | 0 | 11.887  | Up | 4.04E-10 | 1.16E-09 |
| Unigene88990 | Potri.014G030900.1 | 3.784  | 0 | 11.8857 | Up | 1.09E-10 | 3.22E-10 |
| Unigene59755 | Potri.006G246500.1 | 3.784  | 0 | 11.8857 | Up | 1.12E-16 | 4.37E-16 |
| Unigene68798 | Potri.010G142500.1 | 3.7812 | 0 | 11.8846 | Up | 4.38E-28 | 2.52E-27 |
| Unigene94337 | Potri.010G185400.1 | 3.7792 | 0 | 11.8839 | Up | 6.05E-27 | 3.36E-26 |
| Unigene87493 | Potri.012G089500.8 | 3.7772 | 0 | 11.8831 | Up | 7.78E-10 | 2.20E-09 |
| Unigene91294 | Potri.012G139000.1 | 3.7749 | 0 | 11.8822 | Up | 1.10E-12 | 3.59E-12 |
| Unigene89042 | Potri.010G170800.1 | 3.7731 | 0 | 11.8815 | Up | 1.09E-10 | 3.22E-10 |
| Unigene91702 | Potri.009G108400.1 | 3.7728 | 0 | 11.8814 | Up | 2.95E-13 | 9.94E-13 |



|              |                    |        |   |         |    |          |          |
|--------------|--------------------|--------|---|---------|----|----------|----------|
| Unigene72727 | Potri.016G143700.4 | 3.7658 | 0 | 11.8787 | Up | 1.07E-06 | 2.45E-06 |
| Unigene78721 | Potri.009G121400.2 | 3.7613 | 0 | 11.877  | Up | 1.49E-07 | 3.64E-07 |
| Unigene94166 | Potri.001G182700.5 | 3.7589 | 0 | 11.8761 | Up | 5.95E-23 | 2.91E-22 |
| Unigene90898 | Potri.002G228300.1 | 3.7487 | 0 | 11.8722 | Up | 4.07E-12 | 1.30E-11 |
| Unigene62414 | Potri.017G139000.1 | 3.7413 | 0 | 11.8693 | Up | 4.04E-10 | 1.16E-09 |
| Unigene75308 | Potri.017G039800.1 | 3.73   | 0 | 11.865  | Up | 5.53E-07 | 1.30E-06 |
| Unigene87033 | Potri.006G191700.2 | 3.73   | 0 | 11.865  | Up | 1.50E-09 | 4.17E-09 |
| Unigene64541 | Potri.003G134900.1 | 3.73   | 0 | 11.865  | Up | 5.58E-09 | 1.50E-08 |
| Unigene85509 | Potri.002G082200.1 | 3.73   | 0 | 11.865  | Up | 5.58E-09 | 1.50E-08 |
| Unigene93307 | Potri.002G045200.5 | 3.73   | 0 | 11.865  | Up | 1.12E-16 | 4.37E-16 |
| Unigene79202 | Potri.002G067100.2 | 3.7145 | 0 | 11.859  | Up | 1.49E-07 | 3.64E-07 |
| Unigene64660 | Potri.008G124400.2 | 3.7123 | 0 | 11.8581 | Up | 1.07E-06 | 2.45E-06 |
| Unigene70731 | Potri.006G119800.4 | 3.7114 | 0 | 11.8577 | Up | 2.06E-06 | 4.62E-06 |
| Unigene60159 | Potri.001G299100.1 | 3.7114 | 0 | 11.8577 | Up | 4.07E-12 | 1.30E-11 |
| Unigene91479 | Potri.007G014200.8 | 3.7035 | 0 | 11.8547 | Up | 1.10E-12 | 3.59E-12 |
| Unigene93092 | Potri.014G176500.2 | 3.702  | 0 | 11.8541 | Up | 8.00E-16 | 3.02E-15 |
| Unigene79507 | Potri.005G197800.1 | 3.6991 | 0 | 11.853  | Up | 1.49E-07 | 3.64E-07 |
| Unigene75722 | Potri.009G111600.1 | 3.6964 | 0 | 11.8519 | Up | 5.53E-07 | 1.30E-06 |
| Unigene90125 | Potri.017G039500.1 | 3.6901 | 0 | 11.8494 | Up | 2.92E-11 | 8.93E-11 |
| Unigene62349 | Potri.006G055900.1 | 3.6871 | 0 | 11.8483 | Up | 5.68E-13 | 1.89E-12 |
| Unigene87373 | Potri.001G236700.1 | 3.6707 | 0 | 11.8418 | Up | 1.50E-09 | 4.17E-09 |
| Unigene93037 | Potri.009G114900.1 | 3.6665 | 0 | 11.8402 | Up | 1.54E-15 | 5.75E-15 |
| Unigene66670 | Potri.004G034100.3 | 3.6662 | 0 | 11.8401 | Up | 2.87E-07 | 6.89E-07 |
| Unigene85091 | Potri.002G184400.1 | 3.6645 | 0 | 11.8394 | Up | 1.08E-08 | 2.84E-08 |
| Unigene87993 | Potri.010G198600.1 | 3.6613 | 0 | 11.8381 | Up | 7.78E-10 | 2.20E-09 |
| Unigene63645 | Potri.006G014100.2 | 3.6602 | 0 | 11.8377 | Up | 1.07E-06 | 2.45E-06 |
| Unigene79938 | Potri.016G064200.2 | 3.6538 | 0 | 11.8352 | Up | 1.49E-07 | 3.64E-07 |
| Unigene79983 | Potri.006G090000.2 | 3.6538 | 0 | 11.8352 | Up | 1.49E-07 | 3.64E-07 |
| Unigene74327 | Potri.018G026000.1 | 3.6432 | 0 | 11.831  | Up | 1.07E-06 | 2.45E-06 |
| Unigene86049 | Potri.006G015500.3 | 3.642  | 0 | 11.8305 | Up | 5.58E-09 | 1.50E-08 |
| Unigene68658 | Potri.001G414200.1 | 3.6372 | 0 | 11.8286 | Up | 2.97E-15 | 1.10E-14 |
| Unigene67957 | Potri.012G041000.1 | 3.6327 | 0 | 11.8268 | Up | 1.12E-16 | 4.37E-16 |
| Unigene74597 | Potri.008G069600.3 | 3.6263 | 0 | 11.8243 | Up | 1.07E-06 | 2.45E-06 |
| Unigene87633 | Potri.005G092700.2 | 3.6247 | 0 | 11.8236 | Up | 1.50E-09 | 4.17E-09 |
| Unigene68375 | Potri.003G178000.1 | 3.6247 | 0 | 11.8236 | Up | 1.50E-09 | 4.17E-09 |
| Unigene80338 | Potri.001G436100.1 | 3.6242 | 0 | 11.8234 | Up | 1.49E-07 | 3.64E-07 |
| Unigene92064 | Potri.011G162500.1 | 3.6229 | 0 | 11.8229 | Up | 2.95E-13 | 9.94E-13 |
| Unigene86992 | Potri.002G253200.1 | 3.6213 | 0 | 11.8223 | Up | 2.89E-09 | 7.91E-09 |

|              |                    |        |   |         |    |          |          |
|--------------|--------------------|--------|---|---------|----|----------|----------|
| Unigene72213 | Potri.002G105600.1 | 3.6213 | 0 | 11.8223 | Up | 2.06E-06 | 4.62E-06 |
| Unigene92404 | Potri.014G181100.1 | 3.6198 | 0 | 11.8217 | Up | 7.92E-14 | 2.74E-13 |
| Unigene80384 | Potri.014G049800.1 | 3.6096 | 0 | 11.8176 | Up | 1.49E-07 | 3.64E-07 |
| Unigene58460 | Potri.017G071600.1 | 3.6086 | 0 | 11.8172 | Up | 8.68E-34 | 5.83E-33 |
| Unigene65433 | Potri.008G184500.1 | 3.6076 | 0 | 11.8168 | Up | 1.67E-33 | 1.12E-32 |
| Unigene61878 | Potri.013G140900.1 | 3.606  | 0 | 11.8162 | Up | 7.78E-10 | 2.20E-09 |
| Unigene91919 | Potri.002G081300.1 | 3.6042 | 0 | 11.8155 | Up | 5.68E-13 | 1.89E-12 |
| Unigene72475 | Potri.014G147900.3 | 3.6038 | 0 | 11.8153 | Up | 2.06E-06 | 4.62E-06 |
| Unigene69164 | Potri.014G069100.1 | 3.6032 | 0 | 11.8151 | Up | 4.15E-16 | 1.59E-15 |
| Unigene94319 | Potri.013G048100.4 | 3.6028 | 0 | 11.8149 | Up | 6.00E-25 | 3.13E-24 |
| Unigene82152 | Potri.008G133700.5 | 3.6003 | 0 | 11.8139 | Up | 7.71E-08 | 1.93E-07 |
| Unigene82139 | Potri.001G007700.1 | 3.6003 | 0 | 11.8139 | Up | 7.71E-08 | 1.93E-07 |
| Unigene93687 | Potri.001G148800.1 | 3.598  | 0 | 11.813  | Up | 8.07E-18 | 3.31E-17 |
| Unigene55518 | Potri.006G187400.1 | 3.5951 | 0 | 11.8118 | Up | 2.13E-14 | 7.57E-14 |
| Unigene80576 | Potri.001G148800.1 | 3.5951 | 0 | 11.8118 | Up | 1.49E-07 | 3.64E-07 |
| Unigene74993 | Potri.006G210500.2 | 3.5931 | 0 | 11.811  | Up | 1.07E-06 | 2.45E-06 |
| Unigene70249 | Potri.005G051900.1 | 3.59   | 0 | 11.8098 | Up | 1.56E-17 | 6.31E-17 |
| Unigene64708 | Potri.006G113300.1 | 3.5879 | 0 | 11.8089 | Up | 2.13E-14 | 7.57E-14 |
| Unigene94305 | Potri.001G057800.1 | 3.5873 | 0 | 11.8087 | Up | 2.23E-24 | 1.14E-23 |
| Unigene72740 | Potri.010G115100.1 | 3.5865 | 0 | 11.8084 | Up | 2.06E-06 | 4.62E-06 |
| Unigene88451 | Potri.001G460300.1 | 3.5843 | 0 | 11.8075 | Up | 7.78E-10 | 2.20E-09 |
| Unigene86482 | Potri.004G123600.5 | 3.5817 | 0 | 11.8064 | Up | 5.58E-09 | 1.50E-08 |
| Unigene86487 | Potri.002G237100.1 | 3.5817 | 0 | 11.8064 | Up | 5.58E-09 | 1.50E-08 |
| Unigene66973 | Potri.015G131100.4 | 3.5808 | 0 | 11.8061 | Up | 1.49E-07 | 3.65E-07 |
| Unigene90205 | Potri.010G058700.1 | 3.5808 | 0 | 11.8061 | Up | 5.63E-11 | 1.70E-10 |
| Unigene85667 | Potri.008G023900.1 | 3.5767 | 0 | 11.8044 | Up | 1.08E-08 | 2.84E-08 |
| Unigene89427 | Potri.010G156900.1 | 3.5724 | 0 | 11.8027 | Up | 2.09E-10 | 6.11E-10 |
| Unigene60569 | Potri.008G020100.2 | 3.5685 | 0 | 11.8011 | Up | 1.10E-12 | 3.59E-12 |
| Unigene65376 | Potri.001G394000.1 | 3.5648 | 0 | 11.7996 | Up | 4.30E-24 | 2.19E-23 |
| Unigene87955 | Potri.015G011000.1 | 3.5578 | 0 | 11.7968 | Up | 1.50E-09 | 4.17E-09 |
| Unigene77506 | Potri.012G032100.1 | 3.5523 | 0 | 11.7945 | Up | 5.53E-07 | 1.30E-06 |
| Unigene68145 | Potri.008G090500.2 | 3.5523 | 0 | 11.7945 | Up | 1.10E-12 | 3.59E-12 |
| Unigene81063 | Potri.002G212000.1 | 3.5523 | 0 | 11.7945 | Up | 1.49E-07 | 3.64E-07 |
| Unigene82720 | Potri.002G161900.1 | 3.5456 | 0 | 11.7918 | Up | 7.71E-08 | 1.93E-07 |
| Unigene67820 | Potri.008G085500.1 | 3.5406 | 0 | 11.7898 | Up | 5.68E-13 | 1.89E-12 |
| Unigene66334 | Potri.008G080300.1 | 3.5383 | 0 | 11.7888 | Up | 1.49E-07 | 3.65E-07 |
| Unigene86821 | Potri.012G048600.1 | 3.5349 | 0 | 11.7875 | Up | 5.58E-09 | 1.50E-08 |
| Unigene93910 | Potri.014G163300.1 | 3.5261 | 0 | 11.7839 | Up | 5.84E-19 | 2.50E-18 |

|              |                    |        |   |         |    |          |          |
|--------------|--------------------|--------|---|---------|----|----------|----------|
| Unigene86862 | Potri.007G071200.2 | 3.5234 | 0 | 11.7828 | Up | 5.58E-09 | 1.50E-08 |
| Unigene65548 | Potri.006G053400.2 | 3.5234 | 0 | 11.7828 | Up | 5.58E-09 | 1.50E-08 |
| Unigene55962 | Potri.014G029200.4 | 3.5218 | 0 | 11.7821 | Up | 5.53E-07 | 1.30E-06 |
| Unigene63643 | Potri.013G008400.5 | 3.5156 | 0 | 11.7796 | Up | 2.11E-12 | 6.84E-12 |
| Unigene92454 | Potri.001G303000.1 | 3.5115 | 0 | 11.7779 | Up | 1.53E-13 | 5.22E-13 |
| Unigene70092 | Potri.008G026200.2 | 3.5096 | 0 | 11.7771 | Up | 8.92E-40 | 6.96E-39 |
| Unigene71087 | Potri.004G067300.1 | 3.5084 | 0 | 11.7766 | Up | 3.96E-06 | 8.69E-06 |
| Unigene64055 | Potri.001G142300.1 | 3.5056 | 0 | 11.7754 | Up | 7.71E-08 | 1.93E-07 |
| Unigene73944 | Potri.005G198900.2 | 3.5023 | 0 | 11.7741 | Up | 2.06E-06 | 4.62E-06 |
| Unigene70327 | Potri.009G019700.1 | 3.4968 | 0 | 11.7718 | Up | 4.89E-52 | 4.98E-51 |
| Unigene89284 | Potri.006G276700.1 | 3.4968 | 0 | 11.7718 | Up | 4.04E-10 | 1.16E-09 |
| Unigene55117 | Potri.001G138300.2 | 3.4911 | 0 | 11.7695 | Up | 3.96E-06 | 8.70E-06 |
| Unigene67285 | Potri.004G129900.1 | 3.4893 | 0 | 11.7687 | Up | 5.58E-09 | 1.50E-08 |
| Unigene84431 | Potri.009G054200.2 | 3.4884 | 0 | 11.7683 | Up | 4.00E-08 | 1.02E-07 |
| Unigene91594 | Potri.007G086000.2 | 3.4859 | 0 | 11.7673 | Up | 4.07E-12 | 1.30E-11 |
| Unigene90564 | Potri.003G003700.1 | 3.4787 | 0 | 11.7643 | Up | 5.63E-11 | 1.70E-10 |
| Unigene89374 | Potri.002G134600.4 | 3.4771 | 0 | 11.7637 | Up | 4.04E-10 | 1.16E-09 |
| Unigene62277 | Potri.002G036200.2 | 3.4771 | 0 | 11.7637 | Up | 2.95E-13 | 9.95E-13 |
| Unigene78247 | Potri.001G400800.1 | 3.4771 | 0 | 11.7637 | Up | 5.53E-07 | 1.30E-06 |
| Unigene89820 | Potri.003G222000.1 | 3.4745 | 0 | 11.7626 | Up | 2.09E-10 | 6.11E-10 |
| Unigene62589 | Potri.002G090900.2 | 3.4745 | 0 | 11.7626 | Up | 2.09E-10 | 6.11E-10 |
| Unigene71828 | Potri.003G084000.1 | 3.474  | 0 | 11.7624 | Up | 3.96E-06 | 8.69E-06 |
| Unigene89836 | Potri.009G010200.1 | 3.465  | 0 | 11.7586 | Up | 2.09E-10 | 6.11E-10 |
| Unigene94468 | Potri.002G087800.1 | 3.464  | 0 | 11.7582 | Up | 1.20E-32 | 7.84E-32 |
| Unigene84587 | Potri.010G174700.1 | 3.4635 | 0 | 11.758  | Up | 4.00E-08 | 1.02E-07 |
| Unigene59864 | Potri.008G156100.2 | 3.4563 | 0 | 11.755  | Up | 1.49E-07 | 3.65E-07 |
| Unigene88536 | Potri.014G116300.1 | 3.4516 | 0 | 11.753  | Up | 1.50E-09 | 4.17E-09 |
| Unigene92822 | Potri.008G136100.1 | 3.4509 | 0 | 11.7528 | Up | 4.11E-14 | 1.44E-13 |
| Unigene93168 | Potri.004G067300.2 | 3.4473 | 0 | 11.7513 | Up | 5.73E-15 | 2.09E-14 |
| Unigene62541 | Potri.002G058100.1 | 3.4466 | 0 | 11.751  | Up | 1.53E-13 | 5.23E-13 |
| Unigene69875 | Potri.006G127100.1 | 3.4457 | 0 | 11.7506 | Up | 4.07E-12 | 1.30E-11 |
| Unigene82317 | Potri.007G070100.1 | 3.443  | 0 | 11.7495 | Up | 1.49E-07 | 3.64E-07 |
| Unigene66666 | Potri.005G185600.2 | 3.443  | 0 | 11.7495 | Up | 8.07E-18 | 3.31E-17 |
| Unigene72312 | Potri.T157200.1    | 3.4402 | 0 | 11.7483 | Up | 3.96E-06 | 8.69E-06 |
| Unigene74624 | Potri.006G095400.2 | 3.4377 | 0 | 11.7472 | Up | 2.06E-06 | 4.61E-06 |
| Unigene89951 | Potri.012G038200.1 | 3.4368 | 0 | 11.7469 | Up | 2.09E-10 | 6.11E-10 |
| Unigene59000 | Potri.010G090400.2 | 3.4355 | 0 | 11.7463 | Up | 1.08E-08 | 2.85E-08 |
| Unigene61649 | Potri.003G001000.1 | 3.4355 | 0 | 11.7463 | Up | 1.07E-06 | 2.45E-06 |

|              |                    |        |   |         |    |          |          |
|--------------|--------------------|--------|---|---------|----|----------|----------|
| Unigene93427 | Potri.009G153000.1 | 3.4321 | 0 | 11.7449 | Up | 8.00E-16 | 3.02E-15 |
| Unigene93624 | Potri.006G120100.1 | 3.4298 | 0 | 11.7439 | Up | 1.12E-16 | 4.37E-16 |
| Unigene65582 | Potri.013G006000.4 | 3.4271 | 0 | 11.7428 | Up | 5.68E-13 | 1.89E-12 |
| Unigene84915 | Potri.018G115200.1 | 3.4268 | 0 | 11.7426 | Up | 4.00E-08 | 1.02E-07 |
| Unigene63207 | Potri.001G343500.1 | 3.4268 | 0 | 11.7426 | Up | 4.00E-08 | 1.02E-07 |
| Unigene58906 | Potri.002G231900.1 | 3.4214 | 0 | 11.7404 | Up | 2.97E-15 | 1.10E-14 |
| Unigene80869 | Potri.016G064200.2 | 3.4179 | 0 | 11.7389 | Up | 2.87E-07 | 6.88E-07 |
| Unigene80944 | Potri.005G204500.1 | 3.4179 | 0 | 11.7389 | Up | 2.87E-07 | 6.88E-07 |
| Unigene82504 | Potri.008G100200.1 | 3.4168 | 0 | 11.7384 | Up | 1.49E-07 | 3.64E-07 |
| Unigene67185 | Potri.002G217000.1 | 3.4154 | 0 | 11.7378 | Up | 1.51E-11 | 4.70E-11 |
| Unigene85939 | Potri.018G035400.2 | 3.4139 | 0 | 11.7372 | Up | 2.07E-08 | 5.38E-08 |
| Unigene94275 | Potri.004G147200.2 | 3.411  | 0 | 11.736  | Up | 1.15E-22 | 5.56E-22 |
| Unigene61322 | Potri.T041400.1    | 3.4046 | 0 | 11.7333 | Up | 1.53E-13 | 5.23E-13 |
| Unigene82660 | Potri.011G129000.1 | 3.4038 | 0 | 11.7329 | Up | 1.49E-07 | 3.64E-07 |
| Unigene82710 | Potri.008G069700.5 | 3.4038 | 0 | 11.7329 | Up | 1.49E-07 | 3.64E-07 |
| Unigene63582 | Potri.002G206100.1 | 3.4038 | 0 | 11.7329 | Up | 1.49E-07 | 3.65E-07 |
| Unigene85061 | Potri.008G195200.8 | 3.4028 | 0 | 11.7325 | Up | 4.00E-08 | 1.02E-07 |
| Unigene94333 | Potri.002G049200.2 | 3.4022 | 0 | 11.7323 | Up | 4.30E-24 | 2.19E-23 |
| Unigene88784 | Potri.008G085500.2 | 3.4008 | 0 | 11.7317 | Up | 1.50E-09 | 4.17E-09 |
| Unigene66971 | Potri.008G062100.1 | 3.3988 | 0 | 11.7308 | Up | 7.85E-12 | 2.47E-11 |
| Unigene92004 | Potri.009G080800.3 | 3.3984 | 0 | 11.7306 | Up | 2.11E-12 | 6.83E-12 |
| Unigene69866 | Potri.006G113900.1 | 3.3955 | 0 | 11.7294 | Up | 8.14E-20 | 3.60E-19 |
| Unigene79496 | Potri.006G232100.3 | 3.3909 | 0 | 11.7275 | Up | 5.53E-07 | 1.30E-06 |
| Unigene79481 | Potri.005G179500.6 | 3.3909 | 0 | 11.7275 | Up | 5.53E-07 | 1.30E-06 |
| Unigene87625 | Potri.002G173600.1 | 3.3909 | 0 | 11.7275 | Up | 5.58E-09 | 1.50E-08 |
| Unigene84063 | Potri.001G238800.1 | 3.3909 | 0 | 11.7275 | Up | 7.71E-08 | 1.93E-07 |
| Unigene94429 | Potri.003G125900.1 | 3.3877 | 0 | 11.7261 | Up | 2.27E-28 | 1.31E-27 |
| Unigene92806 | Potri.016G089400.1 | 3.3842 | 0 | 11.7246 | Up | 7.92E-14 | 2.74E-13 |
| Unigene60027 | Potri.013G103200.1 | 3.3832 | 0 | 11.7242 | Up | 4.07E-12 | 1.30E-11 |
| Unigene86138 | Potri.009G089900.1 | 3.3795 | 0 | 11.7226 | Up | 2.07E-08 | 5.38E-08 |
| Unigene79619 | Potri.008G213100.1 | 3.3769 | 0 | 11.7215 | Up | 5.53E-07 | 1.30E-06 |
| Unigene77545 | Potri.014G164900.6 | 3.3763 | 0 | 11.7212 | Up | 1.07E-06 | 2.45E-06 |
| Unigene60552 | Potri.010G041100.3 | 3.3763 | 0 | 11.7212 | Up | 1.07E-06 | 2.45E-06 |
| Unigene77629 | Potri.001G002600.1 | 3.3763 | 0 | 11.7212 | Up | 1.07E-06 | 2.45E-06 |
| Unigene60320 | Potri.014G063000.1 | 3.3759 | 0 | 11.7211 | Up | 2.11E-12 | 6.84E-12 |
| Unigene92065 | Potri.012G002000.1 | 3.3759 | 0 | 11.7211 | Up | 2.11E-12 | 6.83E-12 |
| Unigene73134 | Potri.013G131500.1 | 3.3747 | 0 | 11.7205 | Up | 3.96E-06 | 8.69E-06 |
| Unigene91175 | Potri.002G084500.1 | 3.3743 | 0 | 11.7204 | Up | 2.92E-11 | 8.93E-11 |

|              |                    |        |   |         |    |          |          |
|--------------|--------------------|--------|---|---------|----|----------|----------|
| Unigene89362 | Potri.018G062600.1 | 3.3717 | 0 | 11.7193 | Up | 7.78E-10 | 2.20E-09 |
| Unigene66515 | Potri.001G212700.1 | 3.3704 | 0 | 11.7187 | Up | 1.53E-13 | 5.23E-13 |
| Unigene87743 | Potri.001G110700.1 | 3.3697 | 0 | 11.7184 | Up | 5.58E-09 | 1.50E-08 |
| Unigene64504 | Potri.001G020900.1 | 3.3682 | 0 | 11.7178 | Up | 2.07E-08 | 5.38E-08 |
| Unigene63861 | Potri.015G087500.1 | 3.3679 | 0 | 11.7176 | Up | 4.07E-12 | 1.30E-11 |
| Unigene64615 | Potri.011G057700.1 | 3.3654 | 0 | 11.7166 | Up | 1.49E-07 | 3.65E-07 |
| Unigene79732 | Potri.019G097100.2 | 3.3631 | 0 | 11.7156 | Up | 5.53E-07 | 1.30E-06 |
| Unigene79697 | Potri.014G030900.1 | 3.3631 | 0 | 11.7156 | Up | 5.53E-07 | 1.30E-06 |
| Unigene67252 | Potri.004G187400.1 | 3.3631 | 0 | 11.7156 | Up | 5.53E-07 | 1.30E-06 |
| Unigene56381 | Potri.018G142200.1 | 3.3609 | 0 | 11.7146 | Up | 2.97E-15 | 1.10E-14 |
| Unigene68817 | Potri.002G250400.2 | 3.3593 | 0 | 11.7139 | Up | 5.58E-09 | 1.50E-08 |
| Unigene70690 | Potri.011G139500.2 | 3.357  | 0 | 11.713  | Up | 7.64E-06 | 1.63E-05 |
| Unigene85458 | Potri.004G015900.1 | 3.3557 | 0 | 11.7124 | Up | 4.00E-08 | 1.02E-07 |
| Unigene81758 | Potri.001G253200.2 | 3.3511 | 0 | 11.7104 | Up | 2.87E-07 | 6.88E-07 |
| Unigene66730 | Potri.017G013100.1 | 3.3474 | 0 | 11.7088 | Up | 1.19E-30 | 7.35E-30 |
| Unigene55524 | Potri.004G076300.1 | 3.3458 | 0 | 11.7081 | Up | 4.15E-16 | 1.59E-15 |
| Unigene89913 | Potri.006G159200.1 | 3.3448 | 0 | 11.7077 | Up | 4.04E-10 | 1.16E-09 |
| Unigene73749 | Potri.014G015700.3 | 3.3429 | 0 | 11.7069 | Up | 3.96E-06 | 8.69E-06 |
| Unigene73757 | Potri.008G165200.2 | 3.3429 | 0 | 11.7069 | Up | 3.96E-06 | 8.69E-06 |
| Unigene89037 | Potri.006G163700.1 | 3.3419 | 0 | 11.7065 | Up | 1.50E-09 | 4.17E-09 |
| Unigene93218 | Potri.016G101800.1 | 3.3413 | 0 | 11.7062 | Up | 1.11E-14 | 3.97E-14 |
| Unigene83261 | Potri.002G097700.4 | 3.3403 | 0 | 11.7058 | Up | 1.49E-07 | 3.64E-07 |
| Unigene61007 | Potri.001G075900.1 | 3.3367 | 0 | 11.7042 | Up | 1.12E-16 | 4.37E-16 |
| Unigene58451 | Potri.018G074600.1 | 3.3326 | 0 | 11.7024 | Up | 4.00E-08 | 1.02E-07 |
| Unigene85639 | Potri.008G043300.1 | 3.3326 | 0 | 11.7024 | Up | 4.00E-08 | 1.02E-07 |
| Unigene85606 | Potri.001G155800.1 | 3.3326 | 0 | 11.7024 | Up | 4.00E-08 | 1.02E-07 |
| Unigene60245 | Potri.002G236100.1 | 3.3303 | 0 | 11.7014 | Up | 2.89E-09 | 7.92E-09 |
| Unigene78349 | Potri.014G081200.1 | 3.319  | 0 | 11.6965 | Up | 1.07E-06 | 2.45E-06 |
| Unigene64005 | Potri.006G248100.9 | 3.3131 | 0 | 11.694  | Up | 1.50E-09 | 4.17E-09 |
| Unigene86645 | Potri.006G241900.3 | 3.3128 | 0 | 11.6938 | Up | 2.07E-08 | 5.38E-08 |
| Unigene82110 | Potri.003G039700.1 | 3.3123 | 0 | 11.6936 | Up | 2.87E-07 | 6.88E-07 |
| Unigene85780 | Potri.015G026200.1 | 3.3099 | 0 | 11.6926 | Up | 4.00E-08 | 1.02E-07 |
| Unigene93551 | Potri.006G248100.1 | 3.3058 | 0 | 11.6908 | Up | 8.00E-16 | 3.02E-15 |
| Unigene90832 | Potri.008G184400.1 | 3.305  | 0 | 11.6904 | Up | 1.09E-10 | 3.22E-10 |
| Unigene68730 | Potri.015G076700.1 | 3.3037 | 0 | 11.6899 | Up | 1.50E-09 | 4.17E-09 |
| Unigene69965 | Potri.014G056700.6 | 3.2996 | 0 | 11.6881 | Up | 2.19E-20 | 9.88E-20 |
| Unigene54964 | Potri.008G159100.1 | 3.2986 | 0 | 11.6876 | Up | 4.00E-08 | 1.02E-07 |
| Unigene85821 | Potri.007G027000.3 | 3.2986 | 0 | 11.6876 | Up | 4.00E-08 | 1.02E-07 |

|              |                    |        |   |         |    |          |          |
|--------------|--------------------|--------|---|---------|----|----------|----------|
| Unigene87517 | Potri.005G158300.5 | 3.2946 | 0 | 11.6859 | Up | 1.08E-08 | 2.84E-08 |
| Unigene89254 | Potri.008G084800.5 | 3.2943 | 0 | 11.6858 | Up | 1.50E-09 | 4.17E-09 |
| Unigene89249 | Potri.004G205300.1 | 3.2943 | 0 | 11.6858 | Up | 1.50E-09 | 4.17E-09 |
| Unigene71633 | Potri.008G187900.1 | 3.2911 | 0 | 11.6844 | Up | 7.64E-06 | 1.63E-05 |
| Unigene89747 | Potri.017G090500.1 | 3.2881 | 0 | 11.683  | Up | 7.78E-10 | 2.20E-09 |
| Unigene88230 | Potri.002G013500.1 | 3.2878 | 0 | 11.6829 | Up | 5.58E-09 | 1.50E-08 |
| Unigene76712 | Potri.002G102600.1 | 3.2863 | 0 | 11.6822 | Up | 2.06E-06 | 4.61E-06 |
| Unigene87579 | Potri.003G050500.1 | 3.2842 | 0 | 11.6813 | Up | 1.08E-08 | 2.84E-08 |
| Unigene64402 | Potri.018G115200.1 | 3.2824 | 0 | 11.6805 | Up | 4.04E-10 | 1.16E-09 |
| Unigene80795 | Potri.017G101100.2 | 3.2824 | 0 | 11.6805 | Up | 5.53E-07 | 1.30E-06 |
| Unigene54596 | Potri.003G021100.1 | 3.2824 | 0 | 11.6805 | Up | 5.53E-07 | 1.30E-06 |
| Unigene65750 | Potri.001G116900.2 | 3.281  | 0 | 11.6799 | Up | 3.96E-06 | 8.69E-06 |
| Unigene57316 | Potri.012G066900.1 | 3.2804 | 0 | 11.6797 | Up | 2.07E-08 | 5.39E-08 |
| Unigene78908 | Potri.009G056500.2 | 3.2774 | 0 | 11.6783 | Up | 1.07E-06 | 2.45E-06 |
| Unigene78817 | Potri.002G145800.1 | 3.2774 | 0 | 11.6783 | Up | 1.07E-06 | 2.45E-06 |
| Unigene78944 | Potri.002G135800.1 | 3.2774 | 0 | 11.6783 | Up | 1.07E-06 | 2.45E-06 |
| Unigene71973 | Potri.003G118700.1 | 3.2751 | 0 | 11.6773 | Up | 7.64E-06 | 1.63E-05 |
| Unigene94488 | Potri.010G147800.1 | 3.2733 | 0 | 11.6765 | Up | 1.21E-34 | 8.31E-34 |
| Unigene91458 | Potri.008G200200.2 | 3.2703 | 0 | 11.6752 | Up | 2.92E-11 | 8.93E-11 |
| Unigene74651 | Potri.014G085700.2 | 3.2659 | 0 | 11.6733 | Up | 3.96E-06 | 8.69E-06 |
| Unigene87696 | Potri.010G199500.3 | 3.2637 | 0 | 11.6723 | Up | 1.08E-08 | 2.84E-08 |
| Unigene90951 | Potri.001G102100.3 | 3.2637 | 0 | 11.6723 | Up | 1.09E-10 | 3.22E-10 |
| Unigene88899 | Potri.008G171300.1 | 3.2624 | 0 | 11.6717 | Up | 2.89E-09 | 7.91E-09 |
| Unigene66460 | Potri.003G032800.3 | 3.2552 | 0 | 11.6685 | Up | 1.49E-07 | 3.65E-07 |
| Unigene92343 | Potri.009G007800.3 | 3.2538 | 0 | 11.6679 | Up | 2.11E-12 | 6.83E-12 |
| Unigene56906 | Potri.002G199300.2 | 3.2523 | 0 | 11.6672 | Up | 7.78E-10 | 2.20E-09 |
| Unigene79190 | Potri.008G126800.5 | 3.2502 | 0 | 11.6663 | Up | 1.07E-06 | 2.45E-06 |
| Unigene79203 | Potri.001G063000.3 | 3.2502 | 0 | 11.6663 | Up | 1.07E-06 | 2.45E-06 |
| Unigene67694 | Potri.004G050000.2 | 3.2496 | 0 | 11.666  | Up | 2.87E-07 | 6.89E-07 |
| Unigene82814 | Potri.001G007700.1 | 3.2496 | 0 | 11.666  | Up | 2.87E-07 | 6.88E-07 |
| Unigene66057 | Potri.011G154900.1 | 3.2434 | 0 | 11.6633 | Up | 5.63E-11 | 1.70E-10 |
| Unigene61240 | Potri.006G234500.2 | 3.2392 | 0 | 11.6614 | Up | 4.04E-10 | 1.16E-09 |
| Unigene75209 | Potri.004G118300.1 | 3.236  | 0 | 11.66   | Up | 3.96E-06 | 8.69E-06 |
| Unigene60644 | Potri.005G070900.2 | 3.2339 | 0 | 11.6591 | Up | 8.37E-26 | 4.49E-25 |
| Unigene64982 | Potri.008G133700.2 | 3.2334 | 0 | 11.6588 | Up | 1.08E-08 | 2.84E-08 |
| Unigene57294 | Potri.004G232600.4 | 3.2317 | 0 | 11.6581 | Up | 1.49E-07 | 3.65E-07 |
| Unigene77361 | Potri.004G150400.1 | 3.2294 | 0 | 11.6571 | Up | 2.06E-06 | 4.61E-06 |
| Unigene72862 | Potri.015G038600.2 | 3.2278 | 0 | 11.6563 | Up | 7.64E-06 | 1.63E-05 |

|              |                    |        |   |         |    |          |          |
|--------------|--------------------|--------|---|---------|----|----------|----------|
| Unigene55226 | Potri.018G112400.1 | 3.2269 | 0 | 11.6559 | Up | 2.09E-10 | 6.11E-10 |
| Unigene85403 | Potri.009G105800.1 | 3.2266 | 0 | 11.6558 | Up | 7.71E-08 | 1.93E-07 |
| Unigene66923 | Potri.006G189600.1 | 3.2251 | 0 | 11.6551 | Up | 2.87E-07 | 6.89E-07 |
| Unigene65861 | Potri.003G151100.1 | 3.2249 | 0 | 11.655  | Up | 8.00E-16 | 3.02E-15 |
| Unigene75310 | Potri.005G059600.1 | 3.2213 | 0 | 11.6534 | Up | 3.96E-06 | 8.69E-06 |
| Unigene91815 | Potri.001G268200.4 | 3.2213 | 0 | 11.6534 | Up | 1.51E-11 | 4.70E-11 |
| Unigene89574 | Potri.009G060500.6 | 3.2209 | 0 | 11.6532 | Up | 1.50E-09 | 4.17E-09 |
| Unigene88600 | Potri.011G141100.1 | 3.2193 | 0 | 11.6525 | Up | 5.58E-09 | 1.50E-08 |
| Unigene85549 | Potri.009G101400.1 | 3.2155 | 0 | 11.6508 | Up | 7.71E-08 | 1.93E-07 |
| Unigene61854 | Potri.005G019100.1 | 3.2155 | 0 | 11.6508 | Up | 2.06E-06 | 4.62E-06 |
| Unigene85552 | Potri.002G047700.1 | 3.2155 | 0 | 11.6508 | Up | 7.71E-08 | 1.93E-07 |
| Unigene60477 | Potri.001G081100.1 | 3.2102 | 0 | 11.6484 | Up | 1.10E-12 | 3.59E-12 |
| Unigene88643 | Potri.008G150000.1 | 3.2098 | 0 | 11.6483 | Up | 5.58E-09 | 1.50E-08 |
| Unigene92254 | Potri.001G383200.1 | 3.2086 | 0 | 11.6477 | Up | 4.07E-12 | 1.30E-11 |
| Unigene75422 | Potri.005G113600.1 | 3.2067 | 0 | 11.6469 | Up | 3.96E-06 | 8.69E-06 |
| Unigene94128 | Potri.019G128400.1 | 3.2027 | 0 | 11.6451 | Up | 3.03E-19 | 1.31E-18 |
| Unigene68606 | Potri.006G073600.2 | 3.2003 | 0 | 11.644  | Up | 5.58E-09 | 1.50E-08 |
| Unigene69544 | Potri.001G361700.3 | 3.1997 | 0 | 11.6437 | Up | 1.09E-10 | 3.22E-10 |
| Unigene92448 | Potri.001G007100.1 | 3.1993 | 0 | 11.6435 | Up | 2.11E-12 | 6.83E-12 |
| Unigene93227 | Potri.018G027200.1 | 3.199  | 0 | 11.6434 | Up | 4.11E-14 | 1.44E-13 |
| Unigene59933 | Potri.010G183800.1 | 3.1971 | 0 | 11.6425 | Up | 7.64E-06 | 1.64E-05 |
| Unigene73206 | Potri.008G100600.6 | 3.1971 | 0 | 11.6425 | Up | 7.64E-06 | 1.63E-05 |
| Unigene66095 | Potri.004G072800.3 | 3.1971 | 0 | 11.6425 | Up | 4.50E-34 | 3.05E-33 |
| Unigene79948 | Potri.002G134700.1 | 3.1971 | 0 | 11.6425 | Up | 1.07E-06 | 2.45E-06 |
| Unigene84574 | Potri.002G011800.1 | 3.1971 | 0 | 11.6425 | Up | 1.49E-07 | 3.64E-07 |
| Unigene66122 | Potri.006G062400.1 | 3.1942 | 0 | 11.6412 | Up | 1.50E-09 | 4.17E-09 |
| Unigene60313 | Potri.T012100.1    | 3.1923 | 0 | 11.6404 | Up | 3.96E-06 | 8.70E-06 |
| Unigene77982 | Potri.014G142700.1 | 3.188  | 0 | 11.6384 | Up | 2.06E-06 | 4.61E-06 |
| Unigene78011 | Potri.014G123000.1 | 3.188  | 0 | 11.6384 | Up | 2.06E-06 | 4.61E-06 |
| Unigene69408 | Potri.004G052400.1 | 3.1854 | 0 | 11.6373 | Up | 1.50E-09 | 4.17E-09 |
| Unigene73396 | Potri.019G111500.1 | 3.182  | 0 | 11.6357 | Up | 7.64E-06 | 1.63E-05 |
| Unigene68628 | Potri.006G051700.1 | 3.1798 | 0 | 11.6347 | Up | 1.13E-18 | 4.77E-18 |
| Unigene93628 | Potri.001G044600.1 | 3.1796 | 0 | 11.6346 | Up | 1.54E-15 | 5.75E-15 |
| Unigene93689 | Potri.004G073400.1 | 3.1783 | 0 | 11.634  | Up | 8.00E-16 | 3.02E-15 |
| Unigene87508 | Potri.019G129200.1 | 3.1769 | 0 | 11.6334 | Up | 2.07E-08 | 5.38E-08 |
| Unigene93959 | Potri.013G008400.6 | 3.1756 | 0 | 11.6328 | Up | 1.56E-17 | 6.31E-17 |
| Unigene78083 | Potri.T061700.1    | 3.1744 | 0 | 11.6323 | Up | 2.06E-06 | 4.61E-06 |
| Unigene78181 | Potri.T026500.1    | 3.1744 | 0 | 11.6323 | Up | 2.06E-06 | 4.61E-06 |

|              |                    |        |   |         |    |          |          |
|--------------|--------------------|--------|---|---------|----|----------|----------|
| Unigene69555 | Potri.018G137000.1 | 3.1744 | 0 | 11.6323 | Up | 5.63E-11 | 1.70E-10 |
| Unigene78192 | Potri.002G236800.2 | 3.1744 | 0 | 11.6323 | Up | 2.06E-06 | 4.61E-06 |
| Unigene89348 | Potri.012G039700.2 | 3.1699 | 0 | 11.6302 | Up | 2.89E-09 | 7.91E-09 |
| Unigene92171 | Potri.019G078700.1 | 3.1692 | 0 | 11.6299 | Up | 7.85E-12 | 2.47E-11 |
| Unigene82187 | Potri.009G138900.1 | 3.1683 | 0 | 11.6295 | Up | 5.53E-07 | 1.30E-06 |
| Unigene82146 | Potri.006G200200.2 | 3.1683 | 0 | 11.6295 | Up | 5.53E-07 | 1.30E-06 |
| Unigene82163 | Potri.001G146800.1 | 3.1683 | 0 | 11.6295 | Up | 5.53E-07 | 1.30E-06 |
| Unigene61355 | Potri.019G018000.1 | 3.1669 | 0 | 11.6289 | Up | 1.53E-13 | 5.23E-13 |
| Unigene66035 | Potri.005G127900.3 | 3.1669 | 0 | 11.6289 | Up | 1.53E-13 | 5.23E-13 |
| Unigene87590 | Potri.002G048100.1 | 3.1669 | 0 | 11.6289 | Up | 2.07E-08 | 5.38E-08 |
| Unigene90253 | Potri.T153800.1    | 3.166  | 0 | 11.6284 | Up | 7.78E-10 | 2.20E-09 |
| Unigene90261 | Potri.017G026000.2 | 3.166  | 0 | 11.6284 | Up | 7.78E-10 | 2.20E-09 |
| Unigene92681 | Potri.008G190800.1 | 3.1648 | 0 | 11.6279 | Up | 1.10E-12 | 3.59E-12 |
| Unigene66719 | Potri.008G155400.1 | 3.1645 | 0 | 11.6278 | Up | 4.19E-18 | 1.74E-17 |
| Unigene92195 | Potri.003G189000.1 | 3.1555 | 0 | 11.6237 | Up | 7.85E-12 | 2.47E-11 |
| Unigene70958 | Potri.018G139800.4 | 3.1547 | 0 | 11.6233 | Up | 1.47E-05 | 3.07E-05 |
| Unigene67511 | Potri.010G235700.1 | 3.154  | 0 | 11.623  | Up | 2.87E-07 | 6.89E-07 |
| Unigene83742 | Potri.008G116600.1 | 3.154  | 0 | 11.623  | Up | 2.87E-07 | 6.88E-07 |
| Unigene92547 | Potri.011G129800.1 | 3.1532 | 0 | 11.6226 | Up | 2.11E-12 | 6.83E-12 |
| Unigene89893 | Potri.011G085000.1 | 3.1506 | 0 | 11.6214 | Up | 1.50E-09 | 4.17E-09 |
| Unigene85967 | Potri.008G037700.1 | 3.1503 | 0 | 11.6213 | Up | 7.71E-08 | 1.93E-07 |
| Unigene68462 | Potri.016G023000.4 | 3.1437 | 0 | 11.6182 | Up | 2.92E-11 | 8.93E-11 |
| Unigene63710 | Potri.003G122300.7 | 3.1397 | 0 | 11.6164 | Up | 7.71E-08 | 1.93E-07 |
| Unigene74162 | Potri.008G072600.2 | 3.1373 | 0 | 11.6153 | Up | 7.64E-06 | 1.63E-05 |
| Unigene94140 | Potri.006G251000.1 | 3.1369 | 0 | 11.6151 | Up | 5.84E-19 | 2.50E-18 |
| Unigene76457 | Potri.007G071600.1 | 3.1358 | 0 | 11.6146 | Up | 3.96E-06 | 8.69E-06 |
| Unigene59114 | Potri.008G112800.1 | 3.1344 | 0 | 11.614  | Up | 2.06E-06 | 4.62E-06 |
| Unigene83961 | Potri.010G048200.1 | 3.131  | 0 | 11.6124 | Up | 2.87E-07 | 6.88E-07 |
| Unigene60107 | Potri.005G070900.2 | 3.1274 | 0 | 11.6107 | Up | 2.11E-12 | 6.84E-12 |
| Unigene88995 | Potri.011G107400.1 | 3.1263 | 0 | 11.6102 | Up | 5.58E-09 | 1.50E-08 |
| Unigene89019 | Potri.001G007100.1 | 3.1263 | 0 | 11.6102 | Up | 5.58E-09 | 1.50E-08 |
| Unigene89564 | Potri.007G080800.4 | 3.1257 | 0 | 11.61   | Up | 2.89E-09 | 7.91E-09 |
| Unigene90774 | Potri.003G156700.1 | 3.1241 | 0 | 11.6092 | Up | 4.04E-10 | 1.16E-09 |
| Unigene58938 | Potri.013G103200.1 | 3.1213 | 0 | 11.6079 | Up | 3.17E-29 | 1.88E-28 |
| Unigene85249 | Potri.T117700.1    | 3.1191 | 0 | 11.6069 | Up | 1.49E-07 | 3.64E-07 |
| Unigene54261 | Potri.004G123300.4 | 3.1179 | 0 | 11.6064 | Up | 2.07E-08 | 5.39E-08 |
| Unigene93792 | Potri.004G093300.1 | 3.1179 | 0 | 11.6064 | Up | 4.15E-16 | 1.59E-15 |
| Unigene70112 | Potri.013G015600.3 | 3.1143 | 0 | 11.6047 | Up | 5.68E-13 | 1.89E-12 |



|              |                    |        |   |         |    |          |          |
|--------------|--------------------|--------|---|---------|----|----------|----------|
| Unigene93889 | Potri.005G224400.1 | 3.1129 | 0 | 11.604  | Up | 1.12E-16 | 4.37E-16 |
| Unigene81089 | Potri.019G130700.1 | 3.1083 | 0 | 11.6019 | Up | 1.07E-06 | 2.45E-06 |
| Unigene91429 | Potri.018G035600.1 | 3.1083 | 0 | 11.6019 | Up | 1.09E-10 | 3.22E-10 |
| Unigene93034 | Potri.017G138000.1 | 3.1083 | 0 | 11.6019 | Up | 2.95E-13 | 9.94E-13 |
| Unigene74496 | Potri.014G112900.3 | 3.1083 | 0 | 11.6019 | Up | 7.64E-06 | 1.63E-05 |
| Unigene86334 | Potri.010G173000.1 | 3.1083 | 0 | 11.6019 | Up | 7.71E-08 | 1.93E-07 |
| Unigene64722 | Potri.009G094900.3 | 3.1083 | 0 | 11.6019 | Up | 1.47E-05 | 3.07E-05 |
| Unigene69103 | Potri.009G041800.1 | 3.1083 | 0 | 11.6019 | Up | 7.78E-10 | 2.20E-09 |
| Unigene80983 | Potri.009G011100.3 | 3.1083 | 0 | 11.6019 | Up | 1.07E-06 | 2.45E-06 |
| Unigene71779 | Potri.005G180500.2 | 3.1083 | 0 | 11.6019 | Up | 1.47E-05 | 3.07E-05 |
| Unigene74479 | Potri.002G256600.3 | 3.1083 | 0 | 11.6019 | Up | 7.64E-06 | 1.63E-05 |
| Unigene90867 | Potri.003G165600.1 | 3.1005 | 0 | 11.5983 | Up | 4.04E-10 | 1.16E-09 |
| Unigene92927 | Potri.019G068800.1 | 3.0963 | 0 | 11.5963 | Up | 5.68E-13 | 1.89E-12 |
| Unigene67666 | Potri.008G063200.1 | 3.096  | 0 | 11.5962 | Up | 1.07E-06 | 2.45E-06 |
| Unigene79269 | Potri.005G238800.1 | 3.0954 | 0 | 11.5959 | Up | 2.06E-06 | 4.61E-06 |
| Unigene91216 | Potri.019G133000.4 | 3.0931 | 0 | 11.5948 | Up | 2.09E-10 | 6.11E-10 |
| Unigene72064 | Potri.006G219400.1 | 3.0931 | 0 | 11.5948 | Up | 1.47E-05 | 3.07E-05 |
| Unigene93067 | Potri.001G101300.1 | 3.0907 | 0 | 11.5937 | Up | 2.95E-13 | 9.94E-13 |
| Unigene88695 | Potri.006G051700.1 | 3.0899 | 0 | 11.5933 | Up | 1.08E-08 | 2.84E-08 |
| Unigene65984 | Potri.011G031700.2 | 3.0877 | 0 | 11.5923 | Up | 7.71E-08 | 1.93E-07 |
| Unigene63979 | Potri.007G037800.3 | 3.0849 | 0 | 11.591  | Up | 2.95E-13 | 9.95E-13 |
| Unigene67068 | Potri.T154500.5    | 3.0838 | 0 | 11.5905 | Up | 1.07E-06 | 2.45E-06 |
| Unigene67203 | Potri.009G144500.1 | 3.0752 | 0 | 11.5865 | Up | 1.50E-09 | 4.17E-09 |
| Unigene84476 | Potri.018G013800.2 | 3.0749 | 0 | 11.5863 | Up | 2.87E-07 | 6.88E-07 |
| Unigene67490 | Potri.012G002000.1 | 3.0732 | 0 | 11.5855 | Up | 1.58E-21 | 7.42E-21 |
| Unigene93399 | Potri.004G148300.1 | 3.0702 | 0 | 11.5841 | Up | 4.11E-14 | 1.44E-13 |
| Unigene87441 | Potri.012G056800.1 | 3.069  | 0 | 11.5836 | Up | 4.00E-08 | 1.02E-07 |
| Unigene90655 | Potri.017G056900.3 | 3.0683 | 0 | 11.5832 | Up | 7.78E-10 | 2.20E-09 |
| Unigene77515 | Potri.011G081500.1 | 3.0679 | 0 | 11.583  | Up | 3.96E-06 | 8.69E-06 |
| Unigene85669 | Potri.T013700.1    | 3.0657 | 0 | 11.582  | Up | 1.49E-07 | 3.64E-07 |
| Unigene75092 | Potri.007G128000.1 | 3.0657 | 0 | 11.582  | Up | 7.64E-06 | 1.63E-05 |
| Unigene93478 | Potri.001G286600.6 | 3.0657 | 0 | 11.582  | Up | 2.13E-14 | 7.56E-14 |
| Unigene88802 | Potri.006G111400.1 | 3.0627 | 0 | 11.5806 | Up | 1.08E-08 | 2.84E-08 |
| Unigene88213 | Potri.003G131500.2 | 3.0611 | 0 | 11.5798 | Up | 2.07E-08 | 5.38E-08 |
| Unigene87545 | Potri.010G128400.1 | 3.0593 | 0 | 11.579  | Up | 4.00E-08 | 1.02E-07 |
| Unigene87535 | Potri.003G003200.1 | 3.0593 | 0 | 11.579  | Up | 4.00E-08 | 1.02E-07 |
| Unigene67399 | Potri.018G062600.1 | 3.0586 | 0 | 11.5787 | Up | 2.11E-12 | 6.84E-12 |
| Unigene69015 | Potri.017G039600.1 | 3.0543 | 0 | 11.5766 | Up | 1.57E-19 | 6.87E-19 |

|               |                    |            |         |         |    |          |          |
|---------------|--------------------|------------|---------|---------|----|----------|----------|
| Unigene88851  | Potri.001G187000.3 | 3.0538     | 0       | 11.5764 | Up | 1.08E-08 | 2.84E-08 |
| Unigene62405  | Potri.014G157200.3 | 3.053      | 0       | 11.576  | Up | 2.87E-07 | 6.89E-07 |
| Unigene90714  | Potri.002G123700.1 | 3.0526     | 0       | 11.5758 | Up | 7.78E-10 | 2.20E-09 |
| Unigene75315  | Potri.003G119200.4 | 3.0518     | 0       | 11.5754 | Up | 7.64E-06 | 1.63E-05 |
| Unigene93014  | Potri.013G009700.1 | 3.0492     | 0       | 11.5742 | Up | 5.68E-13 | 1.89E-12 |
| Unigene59541  | Potri.017G089500.1 | 3.0449     | 0       | 11.5722 | Up | 2.06E-06 | 4.62E-06 |
| Unigene67009  | Potri.003G121800.1 | 3.0424     | 0       | 11.571  | Up | 1.15E-22 | 5.57E-22 |
| Unigene56853  | Potri.011G031700.2 | 3.0401     | 0       | 11.5699 | Up | 1.54E-15 | 5.75E-15 |
| Unigene83517  | Potri.006G081400.2 | 3.0392     | 0       | 11.5695 | Up | 5.53E-07 | 1.30E-06 |
| Unigene92621  | Potri.008G035400.1 | 3.0387     | 0       | 11.5692 | Up | 4.07E-12 | 1.30E-11 |
| Unigene89474  | Potri.004G157100.2 | 3.0384     | 0       | 11.5691 | Up | 5.58E-09 | 1.50E-08 |
| Unigene54433  | Potri.014G016000.1 | 3.0339     | 0       | 11.567  | Up | 1.47E-05 | 3.07E-05 |
| Unigene63876  | Potri.001G428100.1 | 3.0334     | 0       | 11.5667 | Up | 2.07E-08 | 5.39E-08 |
| Unigene66413  | Potri.T052400.1    | 3.0325     | 0       | 11.5663 | Up | 2.06E-06 | 4.62E-06 |
| Unigene80174  | Potri.017G145700.5 | 3.0325     | 0       | 11.5663 | Up | 2.06E-06 | 4.61E-06 |
| Unigene80162  | Potri.017G131700.1 | 3.0325     | 0       | 11.5663 | Up | 2.06E-06 | 4.61E-06 |
| Unigene58593  | Potri.011G112300.1 | 3.0325     | 0       | 11.5663 | Up | 2.06E-06 | 4.62E-06 |
| Unigene80065  | Potri.009G024000.1 | 3.0325     | 0       | 11.5663 | Up | 2.06E-06 | 4.61E-06 |
| Unigene84903  | Potri.013G090200.1 | 3.0314     | 0       | 11.5658 | Up | 2.87E-07 | 6.88E-07 |
| Unigene84911  | Potri.010G121800.1 | 3.0314     | 0       | 11.5658 | Up | 2.87E-07 | 6.88E-07 |
| Unigene91879  | Potri.011G024900.1 | 3.0311     | 0       | 11.5656 | Up | 5.63E-11 | 1.70E-10 |
| Unigene75650  | Potri.018G013200.1 | 3.0243     | 0       | 11.5624 | Up | 7.64E-06 | 1.63E-05 |
| Unigene62674  | Potri.011G136200.1 | 3.0243     | 0       | 11.5624 | Up | 2.07E-08 | 5.39E-08 |
| Unigene75746  | Potri.006G234500.2 | 3.0243     | 0       | 11.5624 | Up | 7.64E-06 | 1.63E-05 |
| Unigene83709  | Potri.004G021500.4 | 3.0169     | 0       | 11.5589 | Up | 5.53E-07 | 1.30E-06 |
| Unigene92800  | Potri.014G083000.2 | 3.0163     | 0       | 11.5586 | Up | 2.11E-12 | 6.83E-12 |
| Unigene64051  | Potri.017G036200.1 | 3.0152     | 0       | 11.558  | Up | 2.07E-08 | 5.38E-08 |
| Unigene91680  | Potri.010G152200.2 | 3.015      | 0       | 11.5579 | Up | 1.09E-10 | 3.22E-10 |
| Unigene82280  | Potri.001G278700.1 | 3.0127     | 0       | 11.5568 | Up | 1.07E-06 | 2.45E-06 |
| Unigene89058  | Potri.017G091600.2 | 3.0098     | 0       | 11.5555 | Up | 1.08E-08 | 2.84E-08 |
| Unigene63584  | Potri.001G151100.1 | 3.0087     | 0       | 11.5549 | Up | 4.22E-20 | 1.89E-19 |
| Unigene80352  | Potri.001G013200.1 | 3.008      | 0       | 11.5546 | Up | 2.06E-06 | 4.61E-06 |
| Unigene88523  | Potri.008G014100.1 | 3.0062     | 0       | 11.5537 | Up | 2.07E-08 | 5.38E-08 |
| Unigene73524  | Potri.018G126300.1 | 3.0052     | 0       | 11.5532 | Up | 1.47E-05 | 3.07E-05 |
| Unigene91222  | Potri.005G173300.1 | 3.0022     | 0       | 11.5518 | Up | 4.04E-10 | 1.16E-09 |
| Unigene65662  | Potri.014G164900.4 | 3.0002     | 0       | 11.5508 | Up | 2.92E-11 | 8.93E-11 |
| Unigene119328 | Potri.008G062300.1 | 47289.2151 | 17.0553 | 11.4371 | Up | 0        | 0        |
| Unigene118411 | Potri.001G042700.1 | 10991.8708 | 4.0369  | 11.4109 | Up | 0        | 0        |

|               |                    |            |         |         |    |   |   |
|---------------|--------------------|------------|---------|---------|----|---|---|
| Unigene94639  | Potri.001G042600.1 | 26841.1705 | 10.1894 | 11.3632 | Up | 0 | 0 |
| Unigene100860 | Potri.004G187400.1 | 36559.9057 | 14.3068 | 11.3193 | Up | 0 | 0 |
| Unigene117613 | Potri.001G042700.1 | 8057.4046  | 3.2407  | 11.2798 | Up | 0 | 0 |
| Unigene95724  | Potri.001G042600.1 | 19359.8748 | 8.2444  | 11.1974 | Up | 0 | 0 |
| Unigene119280 | Potri.010G195700.1 | 27853.8209 | 12.4397 | 11.1287 | Up | 0 | 0 |
| Unigene100276 | Potri.004G187400.1 | 8410.5542  | 3.7764  | 11.121  | Up | 0 | 0 |
| Unigene26446  | Potri.009G049800.1 | 27827.9618 | 12.5276 | 11.1172 | Up | 0 | 0 |
| Unigene117236 | Potri.009G049900.1 | 12115.2541 | 5.7081  | 11.0515 | Up | 0 | 0 |
| Unigene118998 | Potri.004G073600.1 | 12629.4353 | 5.9945  | 11.0409 | Up | 0 | 0 |
| Unigene110823 | Potri.010G195700.1 | 44167.4533 | 21.5151 | 11.0034 | Up | 0 | 0 |
| Unigene109379 | Potri.009G049900.1 | 9124.6203  | 4.6945  | 10.9246 | Up | 0 | 0 |
| Unigene95258  | Potri.009G148000.1 | 24539.8127 | 13.0011 | 10.8823 | Up | 0 | 0 |
| Unigene100392 | Potri.009G147900.1 | 9575.3805  | 5.211   | 10.8436 | Up | 0 | 0 |
| Unigene36975  | Potri.010G053400.1 | 6910.4386  | 3.9373  | 10.7774 | Up | 0 | 0 |
| Unigene119447 | Potri.006G223900.1 | 27636.3391 | 16.6807 | 10.6942 | Up | 0 | 0 |
| Unigene119010 | Potri.013G089200.1 | 6201.7675  | 3.9744  | 10.6077 | Up | 0 | 0 |
| Unigene106116 | Potri.019G081200.1 | 19272.7478 | 12.5105 | 10.5892 | Up | 0 | 0 |
| Unigene106960 | Potri.003G167500.1 | 15777.573  | 11.246  | 10.4542 | Up | 0 | 0 |
| Unigene119446 | Potri.003G109200.2 | 25888.8979 | 20.1686 | 10.326  | Up | 0 | 0 |
| Unigene115745 | Potri.012G022400.1 | 7345.8763  | 5.8181  | 10.3022 | Up | 0 | 0 |
| Unigene98975  | Potri.004G187200.1 | 1928.9196  | 1.6146  | 10.2224 | Up | 0 | 0 |
| Unigene36846  | Potri.006G093500.1 | 4501.9447  | 3.9588  | 10.1513 | Up | 0 | 0 |
| Unigene116444 | Potri.003G071100.1 | 21939.5017 | 22.2971 | 9.9425  | Up | 0 | 0 |
| Unigene116523 | Potri.017G084000.1 | 4275.5478  | 4.368   | 9.9349  | Up | 0 | 0 |
| Unigene103721 | Potri.013G014300.1 | 6070.9114  | 6.7495  | 9.8129  | Up | 0 | 0 |
| Unigene115042 | Potri.004G187200.1 | 9970.1299  | 11.5836 | 9.7494  | Up | 0 | 0 |
| Unigene110702 | Potri.004G211600.1 | 2191.0584  | 2.679   | 9.6757  | Up | 0 | 0 |
| Unigene99894  | Potri.004G073600.1 | 2548.6629  | 3.1606  | 9.6553  | Up | 0 | 0 |
| Unigene106090 | Potri.005G259900.1 | 1414.0125  | 1.8156  | 9.6051  | Up | 0 | 0 |
| Unigene111604 | Potri.005G259900.1 | 2218.845   | 2.9194  | 9.5699  | Up | 0 | 0 |
| Unigene106270 | Potri.017G084000.1 | 6070.8966  | 9.4972  | 9.3202  | Up | 0 | 0 |
| Unigene97110  | Potri.006G129600.1 | 917.5013   | 1.4569  | 9.2987  | Up | 0 | 0 |
| Unigene113367 | Potri.005G214000.1 | 662.5462   | 1.1118  | 9.219   | Up | 0 | 0 |
| Unigene117683 | Potri.017G084000.1 | 1251.5631  | 2.1318  | 9.1974  | Up | 0 | 0 |
| Unigene115386 | Potri.003G071100.1 | 14341.5474 | 24.9762 | 9.1654  | Up | 0 | 0 |
| Unigene26606  | Potri.019G081200.1 | 16783.2479 | 30.288  | 9.1141  | Up | 0 | 0 |
| Unigene105373 | Potri.008G054000.1 | 3593.0563  | 7.1296  | 8.9772  | Up | 0 | 0 |
| Unigene100938 | Potri.004G012200.1 | 1517.2269  | 3.1056  | 8.9323  | Up | 0 | 0 |

|               |                    |           |         |        |    |           |           |
|---------------|--------------------|-----------|---------|--------|----|-----------|-----------|
| Unigene101586 | Potri.010G206600.1 | 10576.461 | 22.289  | 8.8903 | Up | 0         | 0         |
| Unigene113828 | Potri.010G206600.1 | 6173.219  | 13.4466 | 8.8426 | Up | 0         | 0         |
| Unigene70436  | Potri.008G057600.1 | 89.3324   | 0.2009  | 8.7966 | Up | 6.23E-135 | 1.94E-133 |
| Unigene118352 | Potri.015G056900.1 | 5756.3331 | 12.96   | 8.7949 | Up | 0         | 0         |
| Unigene76221  | Potri.014G069100.2 | 74.1018   | 0.1786  | 8.6966 | Up | 7.75E-126 | 2.21E-124 |
| Unigene110797 | Potri.002G166300.1 | 364.5783  | 0.8891  | 8.6797 | Up | 0         | 0         |
| Unigene61466  | Potri.001G082600.1 | 9.1934    | 0.0227  | 8.6618 | Up | 5.39E-123 | 1.49E-121 |
| Unigene105915 | Potri.015G057000.1 | 5182.108  | 13.4638 | 8.5883 | Up | 0         | 0         |
| Unigene106538 | Potri.010G206600.1 | 5530.7092 | 14.5213 | 8.5732 | Up | 0         | 0         |
| Unigene109182 | Potri.005G199700.3 | 1214.2492 | 3.3959  | 8.4821 | Up | 0         | 0         |
| Unigene93074  | Potri.001G274300.2 | 26.3621   | 0.0755  | 8.4478 | Up | 1.15E-105 | 2.63E-104 |
| Unigene118982 | Potri.002G166300.1 | 1745.9643 | 5.0604  | 8.4306 | Up | 0         | 0         |
| Unigene107019 | Potri.015G004800.1 | 4305.7516 | 12.9883 | 8.3729 | Up | 0         | 0         |
| Unigene84638  | Potri.012G056800.1 | 47.4237   | 0.1435  | 8.3684 | Up | 5.50E-100 | 1.18E-98  |
| Unigene83005  | Potri.003G222400.2 | 49.2186   | 0.1511  | 8.3476 | Up | 1.44E-98  | 3.05E-97  |
| Unigene94526  | Potri.017G146600.1 | 7593.803  | 23.7351 | 8.3217 | Up | 0         | 0         |
| Unigene65474  | Potri.009G108100.1 | 4.8437    | 0.0156  | 8.2784 | Up | 9.68E-94  | 1.90E-92  |
| Unigene68453  | Potri.002G109600.1 | 5.4024    | 0.0174  | 8.2784 | Up | 9.68E-94  | 1.90E-92  |
| Unigene64216  | Potri.008G088900.1 | 8.4274    | 0.0274  | 8.2648 | Up | 6.88E-93  | 1.34E-91  |
| Unigene119573 | Potri.002G166300.1 | 4259.1402 | 14.0331 | 8.2456 | Up | 0         | 0         |
| Unigene75435  | Potri.001G108100.2 | 105.6539  | 0.3637  | 8.1824 | Up | 1.49E-174 | 6.50E-173 |
| Unigene94560  | Potri.017G146600.1 | 3358.3688 | 11.6406 | 8.1725 | Up | 0         | 0         |
| Unigene93835  | Potri.005G091100.1 | 17.281    | 0.0614  | 8.1367 | Up | 6.08E-85  | 1.07E-83  |
| Unigene118402 | Potri.014G124500.1 | 644.7616  | 2.2989  | 8.1317 | Up | 0         | 0         |
| Unigene113233 | Potri.012G111000.2 | 2143.244  | 7.6543  | 8.1293 | Up | 0         | 0         |
| Unigene90388  | Potri.005G025300.1 | 29.3697   | 0.1055  | 8.1209 | Up | 4.31E-84  | 7.48E-83  |
| Unigene114798 | Potri.005G214000.1 | 1720.9147 | 6.2607  | 8.1026 | Up | 0         | 0         |
| Unigene93904  | Potri.008G087400.1 | 32.6095   | 0.1189  | 8.0994 | Up | 1.27E-164 | 5.18E-163 |
| Unigene94430  | Potri.001G254600.5 | 79.5445   | 0.3002  | 8.0497 | Up | 0         | 0         |
| Unigene88627  | Potri.003G095500.5 | 62.8669   | 0.2385  | 8.0422 | Up | 4.25E-158 | 1.63E-156 |
| Unigene85718  | Potri.008G112700.1 | 33.8506   | 0.1376  | 7.9426 | Up | 3.65E-74  | 5.46E-73  |
| Unigene90717  | Potri.010G221900.8 | 25.2797   | 0.1028  | 7.942  | Up | 3.65E-74  | 5.46E-73  |
| Unigene111455 | Potri.010G088600.1 | 961.3039  | 3.9668  | 7.9209 | Up | 0         | 0         |
| Unigene94028  | Potri.015G076500.2 | 26.7912   | 0.1121  | 7.9008 | Up | 4.54E-143 | 1.52E-141 |
| Unigene95556  | Potri.010G088600.1 | 1200.488  | 5.1483  | 7.8653 | Up | 0         | 0         |
| Unigene96167  | Potri.006G129600.1 | 1864.7786 | 8.2514  | 7.8201 | Up | 0         | 0         |
| Unigene72645  | Potri.003G167600.1 | 174.483   | 0.7728  | 7.8188 | Up | 7.50E-269 | 5.71E-267 |
| Unigene75221  | Potri.013G033000.2 | 41.199    | 0.1827  | 7.817  | Up | 6.28E-68  | 8.55E-67  |

|               |                    |            |         |        |    |           |           |
|---------------|--------------------|------------|---------|--------|----|-----------|-----------|
| Unigene119411 | Potri.017G146600.1 | 9808.0593  | 43.8962 | 7.8037 | Up | 0         | 0         |
| Unigene82749  | Potri.005G195000.1 | 68.217     | 0.3056  | 7.8023 | Up | 1.97E-133 | 6.05E-132 |
| Unigene117980 | Potri.009G039200.1 | 13334.4482 | 60.9358 | 7.7737 | Up | 0         | 0         |
| Unigene73632  | Potri.008G005900.1 | 41.3462    | 0.1896  | 7.7687 | Up | 1.16E-65  | 1.53E-64  |
| Unigene76218  | Potri.006G224000.2 | 115.5457   | 0.5358  | 7.7526 | Up | 1.18E-192 | 5.88E-191 |
| Unigene89146  | Potri.005G160200.1 | 74.3853    | 0.3454  | 7.7506 | Up | 2.27E-192 | 1.13E-190 |
| Unigene48572  | Potri.014G149400.1 | 3433.6947  | 16.5167 | 7.6997 | Up | 0         | 0         |
| Unigene70282  | Potri.001G286100.1 | 6.4768     | 0.0312  | 7.6976 | Up | 1.52E-62  | 1.88E-61  |
| Unigene34332  | Potri.012G021600.1 | 1629.7157  | 7.8912  | 7.6902 | Up | 0         | 0         |
| Unigene96313  | Potri.008G057600.1 | 111.0254   | 0.5376  | 7.6901 | Up | 2.45E-245 | 1.65E-243 |
| Unigene82941  | Potri.018G031400.2 | 31.2472    | 0.1516  | 7.6873 | Up | 5.59E-62  | 6.88E-61  |
| Unigene37649  | Potri.003G082700.2 | 147.2      | 0.7176  | 7.6804 | Up | 1.22E-243 | 8.18E-242 |
| Unigene92735  | Potri.006G233300.1 | 16.4447    | 0.0805  | 7.6744 | Up | 2.06E-61  | 2.51E-60  |
| Unigene117779 | Potri.011G057600.1 | 1328.7599  | 6.5052  | 7.6743 | Up | 0         | 0         |
| Unigene89086  | Potri.018G094900.1 | 69.977     | 0.3474  | 7.6541 | Up | 1.26E-179 | 5.73E-178 |
| Unigene47829  | Potri.002G061500.1 | 261.4926   | 1.3857  | 7.56   | Up | 0         | 0         |
| Unigene119554 | Potri.006G226800.3 | 6994.1627  | 37.1552 | 7.5564 | Up | 0         | 0         |
| Unigene90798  | Potri.014G171300.2 | 74.5044    | 0.408   | 7.5126 | Up | 3.52E-216 | 2.00E-214 |
| Unigene89559  | Potri.003G006300.2 | 102.2091   | 0.5612  | 7.5088 | Up | 3.86E-269 | 2.94E-267 |
| Unigene118622 | Potri.013G018000.1 | 1040.9233  | 5.7283  | 7.5055 | Up | 0         | 0         |
| Unigene101449 | Potri.004G034400.2 | 211.5443   | 1.1648  | 7.5047 | Up | 0         | 0         |
| Unigene76363  | Potri.003G158200.2 | 128.9736   | 0.7144  | 7.4961 | Up | 1.24E-213 | 6.94E-212 |
| Unigene86894  | Potri.007G011500.3 | 23.4939    | 0.1305  | 7.4921 | Up | 4.72E-54  | 5.00E-53  |
| Unigene82197  | Potri.003G035500.1 | 27.5443    | 0.1546  | 7.4771 | Up | 1.74E-53  | 1.82E-52  |
| Unigene94453  | Potri.002G052400.2 | 6.2275     | 0.0351  | 7.471  | Up | 3.33E-53  | 3.48E-52  |
| Unigene64197  | Potri.002G067100.2 | 7.6721     | 0.044   | 7.446  | Up | 2.35E-52  | 2.41E-51  |
| Unigene90116  | Potri.001G148800.1 | 18.3506    | 0.1074  | 7.4167 | Up | 3.18E-51  | 3.19E-50  |
| Unigene94102  | Potri.003G148200.1 | 18.4741    | 0.1082  | 7.4157 | Up | 1.93E-101 | 4.20E-100 |
| Unigene94200  | Potri.002G064100.1 | 25.7723    | 0.1515  | 7.4104 | Up | 4.82E-151 | 1.74E-149 |
| Unigene5893   | Potri.008G157600.1 | 116.1841   | 0.684   | 7.4082 | Up | 1.27E-200 | 6.65E-199 |
| Unigene89903  | Potri.002G113000.3 | 37.0968    | 0.2184  | 7.4082 | Up | 7.08E-101 | 1.53E-99  |
| Unigene89445  | Potri.005G237300.5 | 19.0689    | 0.1129  | 7.4    | Up | 1.17E-50  | 1.16E-49  |
| Unigene94301  | Potri.008G087300.1 | 53.9736    | 0.3275  | 7.3646 | Up | 0         | 0         |
| Unigene71320  | Potri.009G111500.1 | 64.1258    | 0.3959  | 7.3396 | Up | 4.54E-96  | 9.22E-95  |
| Unigene101230 | Potri.009G034000.1 | 510.1695   | 3.1725  | 7.3292 | Up | 0         | 0         |
| Unigene49867  | Potri.005G214800.2 | 431.3337   | 2.7091  | 7.3148 | Up | 0         | 0         |
| Unigene74689  | Potri.006G224000.2 | 88.1782    | 0.5556  | 7.3102 | Up | 1.39E-140 | 4.58E-139 |
| Unigene93626  | Potri.016G142900.2 | 20.9465    | 0.132   | 7.31   | Up | 4.32E-94  | 8.54E-93  |

|               |                    |           |         |        |    |           |           |
|---------------|--------------------|-----------|---------|--------|----|-----------|-----------|
| Unigene73155  | Potri.005G195000.1 | 120.6019  | 0.7654  | 7.2998 | Up | 1.22E-185 | 5.83E-184 |
| Unigene94356  | Potri.003G222400.1 | 6.7307    | 0.0432  | 7.2836 | Up | 1.06E-46  | 9.68E-46  |
| Unigene70097  | Potri.002G147300.1 | 11.5169   | 0.075   | 7.2626 | Up | 5.55E-91  | 1.05E-89  |
| Unigene93981  | Potri.007G098900.1 | 17.509    | 0.1143  | 7.2591 | Up | 1.06E-90  | 2.01E-89  |
| Unigene117377 | Potri.002G241700.4 | 4925.2076 | 32.3278 | 7.2513 | Up | 0         | 0         |
| Unigene116243 | Potri.002G241700.4 | 4365.5965 | 28.8871 | 7.2396 | Up | 0         | 0         |
| Unigene102053 | Potri.011G057600.1 | 1330.1993 | 8.8058  | 7.239  | Up | 0         | 0         |
| Unigene77799  | Potri.002G001400.1 | 104.2146  | 0.6899  | 7.239  | Up | 9.99E-178 | 4.46E-176 |
| Unigene102828 | Potri.006G226800.3 | 2093.3782 | 13.9885 | 7.2254 | Up | 0         | 0         |
| Unigene93552  | Potri.010G195700.1 | 19.7101   | 0.1344  | 7.1963 | Up | 9.58E-87  | 1.72E-85  |
| Unigene62786  | Potri.001G354500.1 | 4.9376    | 0.0339  | 7.1864 | Up | 1.36E-43  | 1.16E-42  |
| Unigene103826 | Potri.005G214800.2 | 640.5644  | 4.4039  | 7.1844 | Up | 0         | 0         |
| Unigene55627  | Potri.T161400.1    | 7.5765    | 0.0523  | 7.1786 | Up | 2.61E-43  | 2.21E-42  |
| Unigene78985  | Potri.014G164800.1 | 24.3461   | 0.1681  | 7.1782 | Up | 2.61E-43  | 2.21E-42  |
| Unigene92697  | Potri.002G060500.1 | 11.7313   | 0.081   | 7.1782 | Up | 2.61E-43  | 2.21E-42  |
| Unigene81346  | Potri.008G213300.1 | 22.7615   | 0.1582  | 7.1687 | Up | 5.00E-43  | 4.20E-42  |
| Unigene93828  | Potri.002G102600.1 | 26.5445   | 0.1849  | 7.1655 | Up | 9.69E-127 | 2.79E-125 |
| Unigene63476  | Potri.001G392300.1 | 8.4972    | 0.0594  | 7.1604 | Up | 9.58E-43  | 8.00E-42  |
| Unigene91871  | Potri.014G145700.5 | 12.9664   | 0.0907  | 7.1595 | Up | 9.58E-43  | 8.00E-42  |
| Unigene89218  | Potri.005G235200.4 | 32.6105   | 0.2296  | 7.1501 | Up | 6.39E-84  | 1.10E-82  |
| Unigene93838  | Potri.006G214800.1 | 8.6994    | 0.0613  | 7.1489 | Up | 1.84E-42  | 1.52E-41  |
| Unigene91380  | Potri.013G033000.2 | 27.0377   | 0.1923  | 7.1355 | Up | 4.49E-83  | 7.67E-82  |
| Unigene70191  | Potri.007G015700.1 | 4.9449    | 0.0353  | 7.1301 | Up | 6.74E-42  | 5.52E-41  |
| Unigene85496  | Potri.013G010800.3 | 56.9783   | 0.4157  | 7.0987 | Up | 8.22E-121 | 2.24E-119 |
| Unigene60375  | Potri.004G087000.2 | 6.5665    | 0.0481  | 7.0929 | Up | 9.07E-41  | 7.24E-40  |
| Unigene116221 | Potri.002G241700.4 | 3124.0764 | 23.1838 | 7.0742 | Up | 0         | 0         |
| Unigene70339  | Potri.010G163300.2 | 7.7952    | 0.0602  | 7.0167 | Up | 2.66E-76  | 4.13E-75  |
| Unigene100969 | Potri.005G214800.2 | 574.1132  | 4.4426  | 7.0138 | Up | 0         | 0         |
| Unigene91831  | Potri.016G120000.1 | 58.6136   | 0.4556  | 7.0073 | Up | 9.11E-188 | 4.39E-186 |
| Unigene31571  | Potri.017G146600.1 | 2156.2448 | 16.7746 | 7.0061 | Up | 0         | 0         |
| Unigene70751  | Potri.008G028400.1 | 25.6086   | 0.1999  | 7.0012 | Up | 3.14E-38  | 2.36E-37  |
| Unigene118961 | Potri.004G213400.1 | 1689.0468 | 13.4956 | 6.9676 | Up | 0         | 0         |
| Unigene90540  | Potri.001G192600.1 | 38.9423   | 0.3123  | 6.9623 | Up | 1.58E-109 | 3.79E-108 |
| Unigene118390 | Potri.005G183300.1 | 332.7017  | 2.6729  | 6.9597 | Up | 0         | 0         |
| Unigene94500  | Potri.011G163000.1 | 12.3247   | 0.1002  | 6.9425 | Up | 1.41E-143 | 4.74E-142 |
| Unigene76763  | Potri.013G018000.1 | 64.2472   | 0.5311  | 6.9185 | Up | 3.82E-106 | 8.76E-105 |
| Unigene95701  | Potri.005G174400.1 | 320.9121  | 2.6546  | 6.9175 | Up | 0         | 0         |
| Unigene74456  | Potri.005G160200.1 | 67.001    | 0.5581  | 6.9075 | Up | 2.67E-105 | 6.07E-104 |

|               |                    |           |         |        |    |           |           |
|---------------|--------------------|-----------|---------|--------|----|-----------|-----------|
| Unigene91887  | Potri.012G134000.1 | 10.753    | 0.0905  | 6.8926 | Up | 2.07E-35  | 1.45E-34  |
| Unigene93836  | Potri.003G095600.1 | 14.5781   | 0.1227  | 6.8925 | Up | 8.13E-70  | 1.14E-68  |
| Unigene115732 | Potri.002G191600.1 | 433.2776  | 3.6532  | 6.89   | Up | 0         | 0         |
| Unigene78439  | Potri.003G074400.1 | 40.1324   | 0.3391  | 6.8869 | Up | 1.56E-69  | 2.17E-68  |
| Unigene118782 | Potri.017G135600.3 | 3588.5212 | 30.508  | 6.8781 | Up | 0         | 0         |
| Unigene117269 | Potri.017G135600.1 | 5901.9934 | 50.203  | 6.8773 | Up | 0         | 0         |
| Unigene93914  | Potri.011G061300.1 | 13.8981   | 0.1184  | 6.8751 | Up | 5.69E-69  | 7.87E-68  |
| Unigene70411  | Potri.001G330000.1 | 7.0598    | 0.0616  | 6.8406 | Up | 2.79E-67  | 3.76E-66  |
| Unigene78933  | Potri.008G054700.3 | 37.7677   | 0.3363  | 6.8113 | Up | 7.14E-66  | 9.42E-65  |
| Unigene119548 | Potri.001G182100.1 | 1558.9601 | 13.9847 | 6.8006 | Up | 0         | 0         |
| Unigene84998  | Potri.002G117800.1 | 31.5207   | 0.283   | 6.7994 | Up | 2.61E-65  | 3.41E-64  |
| Unigene83423  | Potri.010G041300.2 | 16.6392   | 0.1494  | 6.7993 | Up | 3.72E-33  | 2.46E-32  |
| Unigene83013  | Potri.002G113000.3 | 49.9197   | 0.4532  | 6.7833 | Up | 2.76E-96  | 5.62E-95  |
| Unigene92905  | Potri.018G047300.1 | 68.2379   | 0.623   | 6.7752 | Up | 3.25E-253 | 2.28E-251 |
| Unigene75135  | Potri.002G049200.2 | 20.0975   | 0.1835  | 6.7751 | Up | 1.36E-32  | 8.87E-32  |
| Unigene93586  | Potri.018G115100.3 | 14.5982   | 0.1333  | 6.775  | Up | 3.49E-64  | 4.47E-63  |
| Unigene118188 | Potri.012G111000.2 | 771.0376  | 7.0858  | 6.7657 | Up | 0         | 0         |
| Unigene89771  | Potri.005G234000.1 | 11.9891   | 0.1104  | 6.7628 | Up | 2.60E-32  | 1.68E-31  |
| Unigene98623  | Potri.016G003400.3 | 111.7365  | 1.0483  | 6.7359 | Up | 6.85E-185 | 3.24E-183 |
| Unigene70223  | Potri.014G178300.1 | 7.1465    | 0.0675  | 6.7262 | Up | 1.82E-31  | 1.15E-30  |
| Unigene107567 | Potri.016G126700.3 | 63.2793   | 0.5998  | 6.7211 | Up | 4.60E-92  | 8.85E-91  |
| Unigene68592  | Potri.014G076000.2 | 7.0719    | 0.0674  | 6.7132 | Up | 3.48E-31  | 2.18E-30  |
| Unigene26267  | Potri.013G018000.1 | 266.1914  | 2.5483  | 6.7068 | Up | 0         | 0         |
| Unigene108664 | Potri.015G070700.1 | 120.2866  | 1.1536  | 6.7042 | Up | 1.14E-180 | 5.21E-179 |
| Unigene106832 | Potri.014G069100.4 | 649.2257  | 6.2281  | 6.7038 | Up | 0         | 0         |
| Unigene91354  | Potri.002G049200.2 | 49.7327   | 0.4818  | 6.6896 | Up | 3.55E-149 | 1.27E-147 |
| Unigene100827 | Potri.002G001400.1 | 141.6418  | 1.3857  | 6.6755 | Up | 1.73E-235 | 1.10E-233 |
| Unigene94277  | Potri.011G061300.1 | 4.8729    | 0.0477  | 6.6746 | Up | 2.43E-30  | 1.49E-29  |
| Unigene87642  | Potri.009G072300.1 | 12.6281   | 0.126   | 6.6471 | Up | 8.87E-30  | 5.35E-29  |
| Unigene94205  | Potri.005G214800.1 | 25.1001   | 0.2518  | 6.6393 | Up | 7.83E-144 | 2.64E-142 |
| Unigene94443  | Potri.010G041800.2 | 3.5878    | 0.0365  | 6.6191 | Up | 3.24E-29  | 1.92E-28  |
| Unigene90812  | Potri.006G002900.4 | 39.9436   | 0.4069  | 6.6171 | Up | 1.87E-113 | 4.68E-112 |
| Unigene90768  | Potri.018G031500.1 | 50.0175   | 0.5113  | 6.6121 | Up | 5.07E-141 | 1.67E-139 |
| Unigene84465  | Potri.005G026700.1 | 14.0375   | 0.144   | 6.6071 | Up | 6.19E-29  | 3.64E-28  |
| Unigene77879  | Potri.004G041600.1 | 16.8088   | 0.1725  | 6.6065 | Up | 6.19E-29  | 3.64E-28  |
| Unigene82583  | Potri.002G102500.1 | 14.8059   | 0.1534  | 6.5927 | Up | 1.18E-28  | 6.90E-28  |
| Unigene93264  | Potri.004G236600.2 | 13.8271   | 0.1453  | 6.5723 | Up | 1.83E-55  | 2.00E-54  |
| Unigene66642  | Potri.001G108100.2 | 6.3536    | 0.0681  | 6.5438 | Up | 2.43E-54  | 2.59E-53  |

|               |                    |           |         |        |    |           |           |
|---------------|--------------------|-----------|---------|--------|----|-----------|-----------|
| Unigene65200  | Potri.001G296400.1 | 5.6174    | 0.0605  | 6.5368 | Up | 1.57E-27  | 8.89E-27  |
| Unigene78350  | Potri.005G241100.4 | 15.8049   | 0.1703  | 6.5361 | Up | 1.57E-27  | 8.89E-27  |
| Unigene67151  | Potri.006G081100.3 | 7.6906    | 0.0829  | 6.5356 | Up | 1.57E-27  | 8.89E-27  |
| Unigene111816 | Potri.017G135600.1 | 5510.0602 | 59.9373 | 6.5225 | Up | 0         | 0         |
| Unigene74129  | Potri.002G048200.1 | 172.0311  | 1.8778  | 6.5175 | Up | 6.52E-262 | 4.80E-260 |
| Unigene100739 | Potri.001G289700.1 | 1170.8193 | 12.7911 | 6.5162 | Up | 0         | 0         |
| Unigene94089  | Potri.015G076500.2 | 19.8359   | 0.2175  | 6.511  | Up | 5.00E-105 | 1.13E-103 |
| Unigene62808  | Potri.007G011500.5 | 5.4803    | 0.0602  | 6.5083 | Up | 5.73E-27  | 3.19E-26  |
| Unigene71929  | Potri.012G070700.1 | 17.831    | 0.196   | 6.5074 | Up | 5.73E-27  | 3.19E-26  |
| Unigene91336  | Potri.005G216400.1 | 26.1814   | 0.2898  | 6.4973 | Up | 2.73E-78  | 4.36E-77  |
| Unigene64596  | Potri.011G113000.1 | 8.2416    | 0.0915  | 6.493  | Up | 1.09E-26  | 6.03E-26  |
| Unigene80283  | Potri.010G111500.1 | 43.642    | 0.4881  | 6.4824 | Up | 1.90E-77  | 3.00E-76  |
| Unigene93958  | Potri.013G130900.1 | 5.167     | 0.058   | 6.4771 | Up | 2.09E-26  | 1.14E-25  |
| Unigene54251  | Potri.001G205900.1 | 5.7639    | 0.065   | 6.4705 | Up | 1.56E-51  | 1.58E-50  |
| Unigene94343  | Potri.004G031100.1 | 7.7368    | 0.0877  | 6.463  | Up | 2.99E-51  | 2.99E-50  |
| Unigene86824  | Potri.001G372600.1 | 34.7398   | 0.394   | 6.4623 | Up | 2.51E-76  | 3.91E-75  |
| Unigene89325  | Potri.001G268200.3 | 19.9706   | 0.2277  | 6.4546 | Up | 5.70E-51  | 5.67E-50  |
| Unigene83470  | Potri.009G099000.1 | 39.0955   | 0.4465  | 6.4522 | Up | 9.16E-76  | 1.41E-74  |
| Unigene117112 | Potri.017G135600.1 | 4417.086  | 50.638  | 6.4467 | Up | 0         | 0         |
| Unigene88042  | Potri.003G178700.1 | 21.2813   | 0.2465  | 6.4319 | Up | 3.96E-50  | 3.88E-49  |
| Unigene77296  | Potri.001G128200.2 | 15.082    | 0.1747  | 6.4318 | Up | 1.45E-25  | 7.73E-25  |
| Unigene77779  | Potri.016G139100.4 | 14.8878   | 0.1725  | 6.4314 | Up | 1.45E-25  | 7.73E-25  |
| Unigene83094  | Potri.005G160200.1 | 13.0408   | 0.1511  | 6.4314 | Up | 1.45E-25  | 7.73E-25  |
| Unigene90847  | Potri.019G133900.1 | 8.7597    | 0.1015  | 6.4313 | Up | 1.45E-25  | 7.73E-25  |
| Unigene102654 | Potri.002G048200.1 | 80.0048   | 0.9318  | 6.4239 | Up | 6.98E-196 | 3.54E-194 |
| Unigene90954  | Potri.004G124800.3 | 34.5021   | 0.4019  | 6.4237 | Up | 1.43E-98  | 3.01E-97  |
| Unigene87827  | Potri.002G067100.2 | 10.657    | 0.1248  | 6.416  | Up | 2.77E-25  | 1.46E-24  |
| Unigene98900  | Potri.013G018000.1 | 293.9427  | 3.4487  | 6.4133 | Up | 0         | 0         |
| Unigene66795  | Potri.001G264400.4 | 7.3949    | 0.0875  | 6.4011 | Up | 5.24E-49  | 5.01E-48  |
| Unigene93809  | Potri.018G007400.1 | 5.2381    | 0.062   | 6.4006 | Up | 5.29E-25  | 2.77E-24  |
| Unigene90036  | Potri.002G244400.2 | 18.2979   | 0.2166  | 6.4005 | Up | 5.24E-49  | 5.01E-48  |
| Unigene89848  | Potri.005G214000.1 | 46.3697   | 0.549   | 6.4002 | Up | 8.32E-121 | 2.26E-119 |
| Unigene94410  | Potri.013G111500.1 | 19.6637   | 0.2341  | 6.3923 | Up | 7.12E-144 | 2.40E-142 |
| Unigene90163  | Potri.003G122900.1 | 8.9758    | 0.1074  | 6.385  | Up | 1.01E-24  | 5.23E-24  |
| Unigene75669  | Potri.006G128600.2 | 15.1214   | 0.181   | 6.3845 | Up | 1.01E-24  | 5.23E-24  |
| Unigene88844  | Potri.008G220400.3 | 9.8157    | 0.1175  | 6.3844 | Up | 1.01E-24  | 5.23E-24  |
| Unigene80212  | Potri.010G148300.1 | 27.1819   | 0.3254  | 6.3843 | Up | 1.91E-48  | 1.81E-47  |
| Unigene102474 | Potri.004G034400.1 | 200.4684  | 2.4486  | 6.3553 | Up | 0         | 0         |



|               |                    |          |        |        |    |           |           |
|---------------|--------------------|----------|--------|--------|----|-----------|-----------|
| Unigene93086  | Potri.010G105700.1 | 6.1583   | 0.0754 | 6.3518 | Up | 3.67E-24  | 1.87E-23  |
| Unigene77483  | Potri.006G022100.3 | 14.2094  | 0.174  | 6.3516 | Up | 3.67E-24  | 1.87E-23  |
| Unigene53941  | Potri.002G099800.2 | 11.1132  | 0.1376 | 6.3357 | Up | 7.00E-24  | 3.54E-23  |
| Unigene54313  | Potri.018G124700.4 | 6.9886   | 0.0875 | 6.3196 | Up | 1.33E-23  | 6.68E-23  |
| Unigene59084  | Potri.014G151200.1 | 6.4284   | 0.0805 | 6.3193 | Up | 9.37E-69  | 1.29E-67  |
| Unigene54225  | Potri.002G198000.1 | 5.7487   | 0.072  | 6.3191 | Up | 1.33E-23  | 6.68E-23  |
| Unigene91124  | Potri.009G027700.1 | 39.2241  | 0.4937 | 6.312  | Up | 3.07E-113 | 7.69E-112 |
| Unigene86324  | Potri.001G090500.1 | 21.1364  | 0.2679 | 6.3019 | Up | 1.21E-45  | 1.08E-44  |
| Unigene64036  | Potri.003G200100.1 | 5.196    | 0.0666 | 6.2857 | Up | 4.85E-23  | 2.38E-22  |
| Unigene80078  | Potri.014G066900.1 | 12.7364  | 0.1634 | 6.2844 | Up | 4.85E-23  | 2.38E-22  |
| Unigene94044  | Potri.002G061500.1 | 17.3066  | 0.2226 | 6.2807 | Up | 9.21E-89  | 1.70E-87  |
| Unigene54394  | Potri.018G144100.1 | 6.7892   | 0.0881 | 6.268  | Up | 9.24E-23  | 4.50E-22  |
| Unigene91842  | Potri.014G097100.2 | 7.0042   | 0.0909 | 6.2678 | Up | 9.24E-23  | 4.50E-22  |
| Unigene76145  | Potri.002G132100.1 | 82.9249  | 1.0764 | 6.2675 | Up | 2.89E-131 | 8.70E-130 |
| Unigene47149  | Potri.018G030600.1 | 9.6219   | 0.1259 | 6.256  | Up | 3.81E-130 | 1.13E-128 |
| Unigene90997  | Potri.010G115100.1 | 15.2167  | 0.1999 | 6.2502 | Up | 5.80E-44  | 4.97E-43  |
| Unigene90734  | Potri.003G109300.1 | 7.8025   | 0.1025 | 6.2502 | Up | 1.76E-22  | 8.50E-22  |
| Unigene76930  | Potri.005G247900.6 | 13.4148  | 0.1763 | 6.2496 | Up | 1.76E-22  | 8.50E-22  |
| Unigene57741  | Potri.009G103400.1 | 5.6745   | 0.0746 | 6.2492 | Up | 1.76E-22  | 8.50E-22  |
| Unigene67849  | Potri.004G048800.1 | 9.0879   | 0.1201 | 6.2416 | Up | 1.11E-43  | 9.42E-43  |
| Unigene70260  | Potri.006G168200.2 | 10.9586  | 0.1452 | 6.2379 | Up | 1.82E-128 | 5.32E-127 |
| Unigene92336  | Potri.005G046800.1 | 12.8839  | 0.1714 | 6.2321 | Up | 2.11E-43  | 1.79E-42  |
| Unigene85553  | Potri.008G087100.3 | 30.6114  | 0.4157 | 6.2024 | Up | 3.73E-63  | 4.68E-62  |
| Unigene112135 | Potri.004G041600.1 | 111.4305 | 1.5133 | 6.2023 | Up | 5.29E-187 | 2.54E-185 |
| Unigene89670  | Potri.019G102200.1 | 8.1625   | 0.1113 | 6.1965 | Up | 1.22E-21  | 5.73E-21  |
| Unigene61435  | Potri.018G145400.1 | 6.8131   | 0.0929 | 6.1965 | Up | 2.77E-42  | 2.29E-41  |
| Unigene64065  | Potri.005G075400.1 | 5.1336   | 0.07   | 6.1965 | Up | 1.22E-21  | 5.73E-21  |
| Unigene65773  | Potri.005G215400.2 | 4.7222   | 0.0644 | 6.1963 | Up | 1.22E-21  | 5.73E-21  |
| Unigene68604  | Potri.014G080600.1 | 5.037    | 0.0687 | 6.1961 | Up | 1.22E-21  | 5.73E-21  |
| Unigene76100  | Potri.001G192800.3 | 12.9882  | 0.1794 | 6.1779 | Up | 2.32E-21  | 1.08E-20  |
| Unigene94504  | Potri.006G201300.1 | 10.3993  | 0.1439 | 6.1753 | Up | 1.37E-122 | 3.78E-121 |
| Unigene69719  | Potri.006G071000.1 | 12.632   | 0.1752 | 6.1719 | Up | 9.33E-62  | 1.14E-60  |
| Unigene62861  | Potri.002G222200.3 | 3.4898   | 0.0488 | 6.1601 | Up | 4.42E-21  | 2.04E-20  |
| Unigene89552  | Potri.002G149700.1 | 15.9409  | 0.2245 | 6.1499 | Up | 6.94E-41  | 5.56E-40  |
| Unigene98403  | Potri.002G048200.1 | 87.9675  | 1.2447 | 6.1431 | Up | 1.69E-139 | 5.49E-138 |
| Unigene70087  | Potri.010G126800.2 | 5.3285   | 0.0755 | 6.1411 | Up | 8.41E-21  | 3.84E-20  |
| Unigene93794  | Potri.010G153000.1 | 4.3882   | 0.0622 | 6.1406 | Up | 8.41E-21  | 3.84E-20  |
| Unigene80920  | Potri.013G096500.1 | 22.5878  | 0.3202 | 6.1404 | Up | 1.32E-40  | 1.05E-39  |

|               |                    |           |         |        |    |           |           |
|---------------|--------------------|-----------|---------|--------|----|-----------|-----------|
| Unigene92087  | Potri.014G095700.1 | 30.9053   | 0.4416  | 6.129  | Up | 5.73E-99  | 1.22E-97  |
| Unigene67845  | Potri.013G117200.1 | 3.6003    | 0.0517  | 6.1218 | Up | 1.60E-20  | 7.25E-20  |
| Unigene63498  | Potri.010G049600.1 | 12.0035   | 0.1736  | 6.1115 | Up | 9.11E-40  | 7.10E-39  |
| Unigene90320  | Potri.010G041300.2 | 14.6639   | 0.2121  | 6.1114 | Up | 9.11E-40  | 7.10E-39  |
| Unigene92120  | Potri.011G009800.1 | 6.053     | 0.0881  | 6.1024 | Up | 3.05E-20  | 1.37E-19  |
| Unigene70420  | Potri.010G128400.1 | 6.4302    | 0.0936  | 6.1022 | Up | 7.47E-78  | 1.19E-76  |
| Unigene72314  | Potri.006G073500.1 | 26.7977   | 0.3901  | 6.1021 | Up | 1.73E-39  | 1.34E-38  |
| Unigene60806  | Potri.014G027000.1 | 5.1209    | 0.0746  | 6.1011 | Up | 1.73E-39  | 1.34E-38  |
| Unigene94090  | Potri.006G178900.1 | 14.819    | 0.2172  | 6.0923 | Up | 2.70E-77  | 4.26E-76  |
| Unigene119268 | Potri.001G289700.1 | 790.4987  | 11.5871 | 6.0922 | Up | 0         | 0         |
| Unigene90363  | Potri.016G061900.1 | 21.5945   | 0.3173  | 6.0887 | Up | 4.01E-58  | 4.61E-57  |
| Unigene65025  | Potri.009G139000.4 | 4.064     | 0.06    | 6.0818 | Up | 5.80E-20  | 2.58E-19  |
| Unigene93216  | Potri.014G056700.5 | 4.9186    | 0.0736  | 6.0624 | Up | 1.10E-19  | 4.86E-19  |
| Unigene64412  | Potri.004G202200.1 | 4.0083    | 0.06    | 6.0619 | Up | 1.10E-19  | 4.86E-19  |
| Unigene91409  | Potri.002G132100.1 | 63.8533   | 0.9568  | 6.0604 | Up | 7.43E-187 | 3.56E-185 |
| Unigene103979 | Potri.001G303600.1 | 796.967   | 11.9439 | 6.0602 | Up | 0         | 0         |
| Unigene93330  | Potri.015G024300.1 | 14.2694   | 0.2145  | 6.0558 | Up | 9.99E-57  | 1.12E-55  |
| Unigene85405  | Potri.013G049900.1 | 64.6612   | 0.9733  | 6.0539 | Up | 1.47E-130 | 4.38E-129 |
| Unigene94255  | Potri.006G034300.1 | 6.4045    | 0.0972  | 6.042  | Up | 8.22E-38  | 6.12E-37  |
| Unigene69777  | Potri.008G131900.1 | 3.6629    | 0.0556  | 6.0418 | Up | 2.10E-19  | 9.15E-19  |
| Unigene118877 | Potri.010G168300.1 | 5621.013  | 85.3936 | 6.0406 | Up | 0         | 0         |
| Unigene26854  | Potri.003G216100.1 | 74.9161   | 1.1384  | 6.0402 | Up | 4.59E-184 | 2.16E-182 |
| Unigene94195  | Potri.008G057700.1 | 6.6488    | 0.1016  | 6.0321 | Up | 1.56E-37  | 1.16E-36  |
| Unigene116435 | Potri.011G085100.2 | 1209.2537 | 18.5179 | 6.0291 | Up | 0         | 0         |
| Unigene110992 | Potri.008G073600.2 | 1021.8114 | 15.6863 | 6.0255 | Up | 0         | 0         |
| Unigene60257  | Potri.016G019800.5 | 6.0022    | 0.0924  | 6.0215 | Up | 4.00E-19  | 1.72E-18  |
| Unigene3723   | Potri.009G081600.8 | 171.3763  | 2.6549  | 6.0124 | Up | 0         | 0         |
| Unigene25167  | Potri.011G122500.1 | 110.0642  | 1.7128  | 6.0058 | Up | 8.33E-233 | 5.19E-231 |
| Unigene83723  | Potri.012G138900.3 | 9.462     | 0.1477  | 6.0014 | Up | 7.60E-19  | 3.24E-18  |
| Unigene93230  | Potri.T114500.1    | 9.393     | 0.1467  | 6.0006 | Up | 1.07E-36  | 7.79E-36  |
| Unigene76778  | Potri.008G039200.2 | 11.288    | 0.1763  | 6.0006 | Up | 7.60E-19  | 3.24E-18  |
| Unigene92180  | Potri.006G197000.1 | 5.5949    | 0.0874  | 6.0003 | Up | 7.60E-19  | 3.24E-18  |
| Unigene93656  | Potri.011G165600.1 | 12.4938   | 0.196   | 5.9942 | Up | 3.25E-54  | 3.45E-53  |
| Unigene113346 | Potri.004G093700.1 | 384.3475  | 6.0357  | 5.9927 | Up | 0         | 0         |
| Unigene88728  | Potri.005G215500.1 | 7.4819    | 0.1185  | 5.9804 | Up | 1.45E-18  | 6.10E-18  |
| Unigene93954  | Potri.012G015600.1 | 7.3412    | 0.1163  | 5.9801 | Up | 3.88E-36  | 2.77E-35  |
| Unigene59405  | Potri.009G142300.1 | 3.639     | 0.0577  | 5.9788 | Up | 1.45E-18  | 6.10E-18  |
| Unigene111646 | Potri.010G168300.1 | 1423.4143 | 22.5721 | 5.9787 | Up | 0         | 0         |

|               |                    |          |          |        |    |           |           |
|---------------|--------------------|----------|----------|--------|----|-----------|-----------|
| Unigene91876  | Potri.008G112800.1 | 17.0921  | 0.2721   | 5.973  | Up | 2.23E-53  | 2.33E-52  |
| Unigene117264 | Potri.003G113400.4 | 6730.297 | 107.3503 | 5.9703 | Up | 0         | 0         |
| Unigene60810  | Potri.T177100.1    | 7.8096   | 0.1256   | 5.9583 | Up | 2.75E-18  | 1.15E-17  |
| Unigene93731  | Potri.006G280000.1 | 3.9605   | 0.0637   | 5.9582 | Up | 2.75E-18  | 1.15E-17  |
| Unigene70201  | Potri.008G059700.1 | 11.8115  | 0.1914   | 5.9475 | Up | 1.32E-103 | 2.94E-102 |
| Unigene92275  | Potri.017G072100.2 | 5.2828   | 0.0862   | 5.9375 | Up | 5.22E-18  | 2.16E-17  |
| Unigene69939  | Potri.016G084800.1 | 3.1005   | 0.0506   | 5.9372 | Up | 5.22E-18  | 2.16E-17  |
| Unigene92770  | Potri.005G087400.1 | 4.8942   | 0.0799   | 5.9367 | Up | 5.22E-18  | 2.16E-17  |
| Unigene58082  | Potri.019G124100.1 | 6.7855   | 0.1114   | 5.9286 | Up | 2.71E-85  | 4.78E-84  |
| Unigene94474  | Potri.018G124600.2 | 5.8957   | 0.0972   | 5.9226 | Up | 1.99E-51  | 2.00E-50  |
| Unigene93927  | Potri.001G372600.1 | 14.2745  | 0.2357   | 5.9203 | Up | 4.35E-68  | 5.93E-67  |
| Unigene49467  | Potri.003G115400.2 | 212.4878 | 3.5147   | 5.9178 | Up | 0         | 0         |
| Unigene91114  | Potri.019G105200.1 | 5.9716   | 0.099    | 5.9145 | Up | 9.92E-18  | 4.05E-17  |
| Unigene90985  | Potri.016G120000.1 | 48.2755  | 0.8017   | 5.9121 | Up | 4.39E-134 | 1.36E-132 |
| Unigene63264  | Potri.009G103400.1 | 5.1413   | 0.0855   | 5.9101 | Up | 1.57E-67  | 2.12E-66  |
| Unigene94251  | Potri.010G192800.2 | 8.7604   | 0.146    | 5.907  | Up | 7.19E-51  | 7.14E-50  |
| Unigene91398  | Potri.010G041300.2 | 39.9702  | 0.6714   | 5.8956 | Up | 4.63E-116 | 1.19E-114 |
| Unigene65027  | Potri.009G144500.1 | 4.5169   | 0.076    | 5.8932 | Up | 6.59E-34  | 4.44E-33  |
| Unigene67645  | Potri.010G006300.1 | 5.6037   | 0.0943   | 5.893  | Up | 1.89E-17  | 7.62E-17  |
| Unigene78681  | Potri.006G113900.2 | 10.0301  | 0.1688   | 5.8929 | Up | 1.89E-17  | 7.62E-17  |
| Unigene83091  | Potri.003G223200.3 | 17.9487  | 0.3021   | 5.8927 | Up | 6.59E-34  | 4.44E-33  |
| Unigene54013  | Potri.006G206300.1 | 8.8087   | 0.1483   | 5.8923 | Up | 6.59E-34  | 4.44E-33  |
| Unigene113318 | Potri.014G044300.2 | 111.7512 | 1.906    | 5.8736 | Up | 9.92E-195 | 5.00E-193 |
| Unigene93229  | Potri.001G004800.1 | 4.2881   | 0.0733   | 5.8704 | Up | 3.58E-17  | 1.43E-16  |
| Unigene78786  | Potri.005G247900.6 | 9.8321   | 0.1681   | 5.8701 | Up | 3.58E-17  | 1.43E-16  |
| Unigene87049  | Potri.006G128600.5 | 15.0401  | 0.2593   | 5.858  | Up | 4.51E-33  | 2.98E-32  |
| Unigene86183  | Potri.004G072600.1 | 7.7603   | 0.1348   | 5.8472 | Up | 6.80E-17  | 2.69E-16  |
| Unigene83720  | Potri.016G056200.6 | 8.5021   | 0.1477   | 5.8471 | Up | 6.80E-17  | 2.69E-16  |
| Unigene55057  | Potri.017G113100.1 | 6.2728   | 0.109    | 5.8467 | Up | 1.21E-48  | 1.15E-47  |
| Unigene92736  | Potri.003G147800.1 | 13.9032  | 0.2416   | 5.8467 | Up | 1.21E-48  | 1.15E-47  |
| Unigene57430  | Potri.002G173900.1 | 7.8592   | 0.1366   | 5.8464 | Up | 1.81E-64  | 2.33E-63  |
| Unigene54306  | Potri.011G120800.1 | 7.7086   | 0.134    | 5.8462 | Up | 6.80E-17  | 2.69E-16  |
| Unigene25811  | Potri.005G174400.1 | 118.3476 | 2.0656   | 5.8403 | Up | 3.25E-174 | 1.41E-172 |
| Unigene23911  | Potri.012G111000.2 | 371.364  | 6.4854   | 5.8395 | Up | 0         | 0         |
| Unigene84590  | Potri.T165000.1    | 16.3852  | 0.287    | 5.8352 | Up | 1.63E-32  | 1.06E-31  |
| Unigene93744  | Potri.006G280200.3 | 7.225    | 0.1266   | 5.8346 | Up | 1.63E-32  | 1.06E-31  |
| Unigene47852  | Potri.T082100.1    | 70.0318  | 1.2302   | 5.831  | Up | 8.37E-142 | 2.78E-140 |
| Unigene80580  | Potri.001G450000.2 | 27.5627  | 0.4842   | 5.831  | Up | 4.37E-48  | 4.11E-47  |

|               |                    |           |         |        |    |           |           |
|---------------|--------------------|-----------|---------|--------|----|-----------|-----------|
| Unigene110294 | Potri.016G003400.3 | 2351.5518 | 41.4523 | 5.826  | Up | 0         | 0         |
| Unigene62867  | Potri.012G136100.1 | 5.177     | 0.0914  | 5.8238 | Up | 3.09E-32  | 1.99E-31  |
| Unigene88704  | Potri.001G204300.2 | 6.7117    | 0.1185  | 5.8237 | Up | 1.29E-16  | 5.04E-16  |
| Unigene85205  | Potri.016G126300.1 | 7.9555    | 0.1405  | 5.8233 | Up | 1.29E-16  | 5.04E-16  |
| Unigene88151  | Potri.003G006800.1 | 13.916    | 0.2458  | 5.8231 | Up | 3.09E-32  | 1.99E-31  |
| Unigene92552  | Potri.016G115600.1 | 4.6913    | 0.0829  | 5.8225 | Up | 1.29E-16  | 5.04E-16  |
| Unigene90670  | Potri.001G298900.1 | 17.4065   | 0.3091  | 5.8154 | Up | 1.57E-47  | 1.46E-46  |
| Unigene54329  | Potri.006G223900.1 | 9.0446    | 0.1611  | 5.811  | Up | 5.86E-32  | 3.75E-31  |
| Unigene69724  | Potri.010G042100.3 | 9.7465    | 0.1747  | 5.8019 | Up | 5.61E-154 | 2.08E-152 |
| Unigene94448  | Potri.005G172000.1 | 4.0179    | 0.0721  | 5.8003 | Up | 1.11E-31  | 7.07E-31  |
| Unigene56399  | Potri.013G105200.2 | 6.2513    | 0.1122  | 5.8    | Up | 2.45E-16  | 9.46E-16  |
| Unigene69900  | Potri.016G103800.1 | 9.991     | 0.1794  | 5.7994 | Up | 1.11E-31  | 7.07E-31  |
| Unigene89915  | Potri.001G057800.1 | 6.0814    | 0.1092  | 5.7994 | Up | 2.45E-16  | 9.46E-16  |
| Unigene72514  | Potri.019G045900.1 | 21.6229   | 0.3883  | 5.7992 | Up | 1.11E-31  | 7.07E-31  |
| Unigene4724   | Potri.011G085100.1 | 1074.4428 | 19.3177 | 5.7975 | Up | 0         | 0         |
| Unigene86795  | Potri.006G263200.1 | 14.3835   | 0.2626  | 5.7754 | Up | 4.00E-31  | 2.51E-30  |
| Unigene70787  | Potri.018G030300.3 | 10.9486   | 0.1999  | 5.7753 | Up | 4.65E-16  | 1.77E-15  |
| Unigene88616  | Potri.007G138100.2 | 13.0604   | 0.2385  | 5.7751 | Up | 4.00E-31  | 2.51E-30  |
| Unigene54092  | Potri.007G098300.1 | 6.8879    | 0.1258  | 5.7749 | Up | 4.00E-31  | 2.51E-30  |
| Unigene93342  | Potri.019G059000.1 | 3.9019    | 0.0713  | 5.7741 | Up | 4.65E-16  | 1.77E-15  |
| Unigene79655  | Potri.010G115800.1 | 36.0716   | 0.6615  | 5.769  | Up | 7.47E-61  | 9.01E-60  |
| Unigene94119  | Potri.008G226200.2 | 17.4826   | 0.3211  | 5.7668 | Up | 1.59E-90  | 3.00E-89  |
| Unigene91417  | Potri.004G158300.5 | 10.3906   | 0.1914  | 5.7625 | Up | 7.58E-31  | 4.71E-30  |
| Unigene65182  | Potri.005G115800.1 | 8.8284    | 0.1628  | 5.761  | Up | 1.69E-208 | 9.19E-207 |
| Unigene114543 | Potri.018G007300.1 | 4850.8684 | 89.5641 | 5.7592 | Up | 0         | 0         |
| Unigene87592  | Potri.001G249200.8 | 27.3295   | 0.5055  | 5.7566 | Up | 2.69E-60  | 3.21E-59  |
| Unigene109904 | Potri.008G073600.2 | 1004.6925 | 18.6179 | 5.7539 | Up | 0         | 0         |
| Unigene74464  | Potri.009G091600.1 | 10.0156   | 0.186   | 5.7508 | Up | 8.82E-16  | 3.32E-15  |
| Unigene88182  | Potri.006G129500.2 | 13.1913   | 0.245   | 5.7507 | Up | 1.44E-30  | 8.87E-30  |
| Unigene62932  | Potri.019G089300.1 | 4.2586    | 0.0791  | 5.7506 | Up | 8.82E-16  | 3.32E-15  |
| Unigene71398  | Potri.012G099300.1 | 10.657    | 0.198   | 5.7502 | Up | 8.82E-16  | 3.32E-15  |
| Unigene69213  | Potri.001G137100.1 | 13.8747   | 0.2588  | 5.7445 | Up | 9.65E-60  | 1.14E-58  |
| Unigene94402  | Potri.005G139300.1 | 34.1882   | 0.6385  | 5.7427 | Up | 8.79E-235 | 5.52E-233 |
| Unigene102054 | Potri.006G073500.1 | 100.1428  | 1.8764  | 5.7379 | Up | 7.99E-176 | 3.52E-174 |
| Unigene118305 | Potri.014G116800.3 | 1812.5305 | 34.148  | 5.7301 | Up | 0         | 0         |
| Unigene92783  | Potri.012G129200.2 | 4.2184    | 0.0797  | 5.726  | Up | 1.67E-15  | 6.23E-15  |
| Unigene72037  | Potri.016G065300.3 | 10.3711   | 0.196   | 5.7256 | Up | 1.67E-15  | 6.23E-15  |
| Unigene91761  | Potri.011G113000.1 | 9.7303    | 0.1839  | 5.7255 | Up | 5.17E-30  | 3.14E-29  |

|               |                    |           |         |        |    |           |           |
|---------------|--------------------|-----------|---------|--------|----|-----------|-----------|
| Unigene110176 | Potri.014G116800.3 | 3233.2465 | 61.2779 | 5.7215 | Up | 0         | 0         |
| Unigene91754  | Potri.001G336200.1 | 19.3753   | 0.3678  | 5.7192 | Up | 1.25E-58  | 1.45E-57  |
| Unigene9394   | Potri.001G303000.1 | 458.2691  | 8.7244  | 5.715  | Up | 0         | 0         |
| Unigene60602  | Potri.009G114900.1 | 8.7445    | 0.1667  | 5.713  | Up | 9.80E-30  | 5.90E-29  |
| Unigene70544  | Potri.006G250900.1 | 21.0742   | 0.4019  | 5.7125 | Up | 9.80E-30  | 5.90E-29  |
| Unigene46840  | Potri.012G090700.1 | 198.6377  | 3.7911  | 5.7114 | Up | 3.13E-286 | 2.61E-284 |
| Unigene90755  | Potri.002G113000.3 | 21.3547   | 0.409   | 5.7063 | Up | 4.47E-58  | 5.13E-57  |
| Unigene74378  | Potri.001G274300.1 | 9.7152    | 0.1869  | 5.6999 | Up | 3.17E-15  | 1.17E-14  |
| Unigene59546  | Potri.010G229900.2 | 14.3613   | 0.2763  | 5.6998 | Up | 1.82E-128 | 5.30E-127 |
| Unigene92226  | Potri.005G083800.5 | 9.0228    | 0.1736  | 5.6997 | Up | 1.86E-29  | 1.11E-28  |
| Unigene63179  | Potri.009G112300.4 | 4.0169    | 0.0773  | 5.6995 | Up | 3.17E-15  | 1.17E-14  |
| Unigene75314  | Potri.008G213300.1 | 9.4944    | 0.1827  | 5.6995 | Up | 3.17E-15  | 1.17E-14  |
| Unigene26341  | Potri.017G130700.2 | 1175.9936 | 22.6717 | 5.6968 | Up | 0         | 0         |
| Unigene94224  | Potri.015G132300.4 | 15.4375   | 0.2988  | 5.6911 | Up | 1.58E-85  | 2.80E-84  |
| Unigene112432 | Potri.014G056600.1 | 349.8176  | 6.7802  | 5.6891 | Up | 0         | 0         |
| Unigene14299  | Potri.005G235200.4 | 38.8756   | 0.7547  | 5.6868 | Up | 3.66E-169 | 1.54E-167 |
| Unigene93504  | Potri.003G151200.1 | 7.0412    | 0.1367  | 5.6867 | Up | 3.52E-29  | 2.09E-28  |
| Unigene54193  | Potri.018G003400.1 | 10.1977   | 0.198   | 5.6866 | Up | 3.52E-29  | 2.09E-28  |
| Unigene93739  | Potri.014G124400.1 | 16.3481   | 0.3179  | 5.6844 | Up | 4.12E-71  | 5.88E-70  |
| Unigene106217 | Potri.013G049900.1 | 401.827   | 7.8198  | 5.6833 | Up | 0         | 0         |
| Unigene116439 | Potri.002G132100.1 | 103.363   | 2.0156  | 5.6804 | Up | 5.87E-224 | 3.49E-222 |
| Unigene61795  | Potri.003G095100.1 | 4.9793    | 0.0975  | 5.6744 | Up | 6.67E-29  | 3.92E-28  |
| Unigene55265  | Potri.008G146900.1 | 8.3224    | 0.163   | 5.6741 | Up | 6.67E-29  | 3.92E-28  |
| Unigene76701  | Potri.004G190900.1 | 9.0373    | 0.177   | 5.6741 | Up | 6.01E-15  | 2.19E-14  |
| Unigene91985  | Potri.010G153000.1 | 4.569     | 0.0895  | 5.6738 | Up | 6.01E-15  | 2.19E-14  |
| Unigene82479  | Potri.013G015600.2 | 15.6601   | 0.3068  | 5.6737 | Up | 6.67E-29  | 3.92E-28  |
| Unigene90400  | Potri.019G050600.9 | 5.3844    | 0.1055  | 5.6735 | Up | 6.01E-15  | 2.19E-14  |
| Unigene118203 | Potri.010G183700.1 | 1280.1385 | 25.1763 | 5.6681 | Up | 0         | 0         |
| Unigene111511 | Potri.001G286700.1 | 3538.9749 | 69.8498 | 5.6629 | Up | 0         | 0         |
| Unigene64945  | Potri.001G341100.3 | 3.8365    | 0.0765  | 5.6482 | Up | 1.14E-14  | 4.09E-14  |
| Unigene67143  | Potri.002G131000.1 | 3.689     | 0.0736  | 5.6474 | Up | 1.14E-14  | 4.09E-14  |
| Unigene86850  | Potri.003G170200.1 | 6.5608    | 0.1309  | 5.6473 | Up | 1.14E-14  | 4.09E-14  |
| Unigene81086  | Potri.016G091600.1 | 7.9928    | 0.1595  | 5.6471 | Up | 1.14E-14  | 4.09E-14  |
| Unigene73946  | Potri.001G047900.1 | 9.4562    | 0.1887  | 5.6471 | Up | 1.14E-14  | 4.09E-14  |
| Unigene68018  | Potri.009G131900.2 | 6.374     | 0.1272  | 5.647  | Up | 2.39E-28  | 1.38E-27  |
| Unigene93566  | Potri.001G148800.1 | 6.7139    | 0.134   | 5.6468 | Up | 2.39E-28  | 1.38E-27  |
| Unigene93962  | Potri.006G100300.2 | 11.5182   | 0.2319  | 5.6343 | Up | 5.04E-55  | 5.44E-54  |
| Unigene61029  | Potri.004G123300.5 | 7.9662    | 0.1604  | 5.6341 | Up | 4.53E-28  | 2.60E-27  |

|               |                    |           |         |        |    |           |           |
|---------------|--------------------|-----------|---------|--------|----|-----------|-----------|
| Unigene14216  | Potri.010G041300.1 | 45.6155   | 0.9223  | 5.6281 | Up | 6.04E-95  | 1.21E-93  |
| Unigene35342  | Potri.004G213400.1 | 271.4774  | 5.497   | 5.626  | Up | 0         | 0         |
| Unigene69064  | Potri.007G027000.1 | 4.3882    | 0.0892  | 5.6204 | Up | 8.58E-28  | 4.89E-27  |
| Unigene70118  | Potri.013G079900.1 | 4.018     | 0.0817  | 5.62   | Up | 2.16E-14  | 7.65E-14  |
| Unigene92761  | Potri.017G123600.1 | 15.6465   | 0.3196  | 5.6134 | Up | 3.42E-54  | 3.63E-53  |
| Unigene16051  | Potri.001G057300.1 | 55.2752   | 1.1297  | 5.6126 | Up | 7.75E-94  | 1.53E-92  |
| Unigene101981 | Potri.002G083100.1 | 465.9019  | 9.5264  | 5.612  | Up | 0         | 0         |
| Unigene94096  | Potri.014G029000.2 | 7.9532    | 0.1627  | 5.6112 | Up | 7.26E-41  | 5.81E-40  |
| Unigene58994  | Potri.005G009000.1 | 4.9638    | 0.1019  | 5.6062 | Up | 1.62E-27  | 9.17E-27  |
| Unigene85595  | Potri.005G190900.1 | 6.6652    | 0.1381  | 5.5929 | Up | 4.09E-14  | 1.43E-13  |
| Unigene92864  | Potri.011G068600.6 | 7.5765    | 0.157   | 5.5927 | Up | 3.07E-27  | 1.72E-26  |
| Unigene106375 | Potri.001G119500.2 | 217.3575  | 4.5337  | 5.5832 | Up | 0         | 0         |
| Unigene92173  | Potri.012G037200.1 | 8.3519    | 0.1747  | 5.5792 | Up | 5.82E-27  | 3.23E-26  |
| Unigene69002  | Potri.001G138700.3 | 5.2484    | 0.1098  | 5.5789 | Up | 5.82E-27  | 3.23E-26  |
| Unigene67099  | Potri.011G165500.1 | 8.8918    | 0.1866  | 5.5745 | Up | 9.31E-40  | 7.26E-39  |
| Unigene112555 | Potri.011G016400.1 | 101.9623  | 2.141   | 5.5736 | Up | 4.89E-168 | 2.03E-166 |
| Unigene94491  | Potri.003G216600.1 | 19.1437   | 0.4027  | 5.571  | Up | 1.72E-180 | 7.88E-179 |
| Unigene14945  | Potri.012G001600.2 | 41.12     | 0.8665  | 5.5685 | Up | 1.56E-103 | 3.47E-102 |
| Unigene109058 | Potri.003G088500.1 | 1482.4812 | 31.2762 | 5.5668 | Up | 0         | 0         |
| Unigene86318  | Potri.008G018800.1 | 56.8196   | 1.2056  | 5.5586 | Up | 1.92E-115 | 4.94E-114 |
| Unigene116440 | Potri.007G136700.1 | 1809.7882 | 38.4216 | 5.5578 | Up | 0         | 0         |
| Unigene88147  | Potri.006G014100.1 | 17.2852   | 0.3675  | 5.5556 | Up | 3.33E-39  | 2.56E-38  |
| Unigene92117  | Potri.001G297200.3 | 12.4332   | 0.2644  | 5.5553 | Up | 3.33E-39  | 2.56E-38  |
| Unigene90901  | Potri.005G241100.4 | 33.176    | 0.7068  | 5.5527 | Up | 1.10E-89  | 2.06E-88  |
| Unigene93799  | Potri.007G123400.1 | 5.8226    | 0.1242  | 5.5509 | Up | 2.08E-26  | 1.14E-25  |
| Unigene114084 | Potri.002G191600.1 | 1008.2181 | 21.6148 | 5.5436 | Up | 0         | 0         |
| Unigene37019  | Potri.003G115400.2 | 158.3392  | 3.3959  | 5.5431 | Up | 0         | 0         |
| Unigene15948  | Potri.019G018900.3 | 64.1552   | 1.3778  | 5.5411 | Up | 1.97E-151 | 7.15E-150 |
| Unigene67443  | Potri.009G054600.1 | 3.0325    | 0.0653  | 5.5373 | Up | 3.94E-26  | 2.13E-25  |
| Unigene65903  | Potri.004G135300.1 | 6.7449    | 0.1453  | 5.5367 | Up | 3.94E-26  | 2.13E-25  |
| Unigene58578  | Potri.017G145700.4 | 7.9361    | 0.171   | 5.5364 | Up | 1.46E-13  | 5.02E-13  |
| Unigene88363  | Potri.009G115000.3 | 11.2348   | 0.2421  | 5.5362 | Up | 3.94E-26  | 2.13E-25  |
| Unigene100696 | Potri.006G080900.1 | 89.8287   | 1.9467  | 5.5281 | Up | 1.11E-174 | 4.85E-173 |
| Unigene89323  | Potri.010G168300.1 | 31.488    | 0.683   | 5.5268 | Up | 1.49E-75  | 2.28E-74  |
| Unigene90598  | Potri.006G088000.2 | 42.8753   | 0.9321  | 5.5235 | Up | 2.12E-112 | 5.26E-111 |
| Unigene70305  | Potri.006G110500.1 | 5.7788    | 0.1258  | 5.5216 | Up | 7.45E-26  | 4.00E-25  |
| Unigene119368 | Potri.018G075200.1 | 1024.0706 | 22.3376 | 5.5187 | Up | 0         | 0         |
| Unigene59163  | Potri.019G114600.3 | 3.7762    | 0.083   | 5.5077 | Up | 2.77E-13  | 9.36E-13  |

|               |                    |           |         |        |    |           |           |
|---------------|--------------------|-----------|---------|--------|----|-----------|-----------|
| Unigene66443  | Potri.017G039600.1 | 6.5042    | 0.143   | 5.5073 | Up | 4.85E-50  | 4.74E-49  |
| Unigene61578  | Potri.006G049300.1 | 4.9464    | 0.1088  | 5.5066 | Up | 1.41E-25  | 7.50E-25  |
| Unigene91215  | Potri.018G048100.1 | 13.2823   | 0.294   | 5.4975 | Up | 1.52E-37  | 1.13E-36  |
| Unigene65731  | Potri.006G188600.2 | 9.2297    | 0.205   | 5.4926 | Up | 2.66E-25  | 1.41E-24  |
| Unigene84251  | Potri.005G160200.1 | 39.1847   | 0.8704  | 5.4925 | Up | 1.28E-73  | 1.91E-72  |
| Unigene87035  | Potri.004G158300.5 | 11.6711   | 0.2593  | 5.4922 | Up | 2.66E-25  | 1.41E-24  |
| Unigene70402  | Potri.008G147000.1 | 10.3511   | 0.2307  | 5.4876 | Up | 2.42E-73  | 3.59E-72  |
| Unigene63613  | Potri.009G046400.1 | 8.4485    | 0.1888  | 5.4838 | Up | 3.83E-61  | 4.65E-60  |
| Unigene93044  | Potri.001G090500.2 | 6.7689    | 0.1519  | 5.4777 | Up | 5.03E-25  | 2.64E-24  |
| Unigene55585  | Potri.001G348600.1 | 5.1596    | 0.1158  | 5.4776 | Up | 5.24E-13  | 1.75E-12  |
| Unigene92669  | Potri.015G053300.1 | 7.2485    | 0.1627  | 5.4774 | Up | 5.03E-25  | 2.64E-24  |
| Unigene87369  | Potri.010G230400.1 | 5.6837    | 0.1276  | 5.4771 | Up | 5.24E-13  | 1.75E-12  |
| Unigene55891  | Potri.011G120800.1 | 7.8525    | 0.1763  | 5.477  | Up | 5.24E-13  | 1.75E-12  |
| Unigene66550  | Potri.008G200500.1 | 3.5808    | 0.0804  | 5.4769 | Up | 5.24E-13  | 1.75E-12  |
| Unigene97444  | Potri.013G018000.1 | 55.5349   | 1.2502  | 5.4732 | Up | 1.98E-84  | 3.45E-83  |
| Unigene118327 | Potri.010G183700.1 | 1340.4308 | 30.2328 | 5.4704 | Up | 0         | 0         |
| Unigene91629  | Potri.018G100600.1 | 8.2406    | 0.1869  | 5.4624 | Up | 9.51E-25  | 4.94E-24  |
| Unigene69882  | Potri.005G145100.1 | 8.4301    | 0.1912  | 5.4624 | Up | 5.83E-72  | 8.45E-71  |
| Unigene114471 | Potri.016G003400.2 | 2635.006  | 59.8313 | 5.4608 | Up | 0         | 0         |
| Unigene79888  | Potri.008G173500.1 | 36.0816   | 0.8201  | 5.4593 | Up | 4.88E-60  | 5.81E-59  |
| Unigene91392  | Potri.014G029000.3 | 42.1067   | 0.9591  | 5.4562 | Up | 1.67E-118 | 4.43E-117 |
| Unigene94450  | Potri.006G025800.1 | 6.2887    | 0.1434  | 5.4546 | Up | 4.17E-48  | 3.92E-47  |
| Unigene91160  | Potri.005G259800.1 | 8.5935    | 0.197   | 5.447  | Up | 1.80E-24  | 9.26E-24  |
| Unigene90699  | Potri.010G209400.1 | 4.4836    | 0.1028  | 5.4467 | Up | 9.91E-13  | 3.26E-12  |
| Unigene66204  | Potri.010G144000.1 | 3.7063    | 0.085   | 5.4464 | Up | 9.91E-13  | 3.26E-12  |
| Unigene70236  | Potri.006G129400.1 | 3.6697    | 0.0847  | 5.4372 | Up | 6.92E-36  | 4.91E-35  |
| Unigene66191  | Potri.006G040300.3 | 9.4259    | 0.2176  | 5.4369 | Up | 6.92E-36  | 4.91E-35  |
| Unigene102927 | Potri.011G018600.1 | 145.212   | 3.3743  | 5.4274 | Up | 2.77E-253 | 1.94E-251 |
| Unigene66674  | Potri.018G046200.3 | 8.712     | 0.2032  | 5.422  | Up | 2.21E-58  | 2.56E-57  |
| Unigene88235  | Potri.004G082200.2 | 47.0496   | 1.0993  | 5.4195 | Up | 7.76E-104 | 1.74E-102 |
| Unigene61475  | Potri.019G049000.5 | 3.9809    | 0.0932  | 5.4166 | Up | 1.87E-12  | 6.08E-12  |
| Unigene66509  | Potri.001G238800.1 | 4.7661    | 0.1116  | 5.4164 | Up | 6.41E-24  | 3.24E-23  |
| Unigene93426  | Potri.009G137400.2 | 14.8939   | 0.3488  | 5.4162 | Up | 4.18E-58  | 4.80E-57  |
| Unigene92751  | Potri.011G069600.1 | 3.4179    | 0.0801  | 5.4152 | Up | 1.87E-12  | 6.08E-12  |
| Unigene92879  | Potri.005G087200.1 | 56.7855   | 1.3317  | 5.4142 | Up | 4.41E-194 | 2.21E-192 |
| Unigene117802 | Potri.008G073600.2 | 1150.0695 | 27.1041 | 5.4071 | Up | 0         | 0         |
| Unigene116777 | Potri.008G101600.1 | 102.9963  | 2.4281  | 5.4066 | Up | 9.77E-227 | 5.90E-225 |
| Unigene116135 | Potri.006G088000.2 | 1163.8908 | 27.4404 | 5.4065 | Up | 0         | 0         |

|               |                    |          |        |        |    |           |           |
|---------------|--------------------|----------|--------|--------|----|-----------|-----------|
| Unigene66425  | Potri.001G385200.1 | 6.6685   | 0.1579 | 5.4003 | Up | 1.21E-23  | 6.07E-23  |
| Unigene91256  | Potri.002G146100.1 | 8.2385   | 0.1951 | 5.4001 | Up | 1.21E-23  | 6.07E-23  |
| Unigene94287  | Potri.008G024300.1 | 27.9747  | 0.6634 | 5.3981 | Up | 4.11E-158 | 1.58E-156 |
| Unigene68229  | Potri.010G141600.1 | 4.2844   | 0.1018 | 5.3953 | Up | 8.79E-35  | 6.05E-34  |
| Unigene82773  | Potri.016G124700.2 | 6.3579   | 0.1522 | 5.3845 | Up | 3.54E-12  | 1.13E-11  |
| Unigene92729  | Potri.014G149000.1 | 13.4547  | 0.3221 | 5.3845 | Up | 1.27E-45  | 1.13E-44  |
| Unigene54736  | Potri.017G076400.2 | 11.6832  | 0.2797 | 5.3844 | Up | 1.66E-34  | 1.13E-33  |
| Unigene25884  | Potri.001G381000.1 | 54.6736  | 1.309  | 5.3843 | Up | 3.70E-112 | 9.14E-111 |
| Unigene88756  | Potri.006G126300.3 | 4.9367   | 0.1182 | 5.3842 | Up | 3.54E-12  | 1.13E-11  |
| Unigene85884  | Potri.005G227600.1 | 5.7091   | 0.1367 | 5.3842 | Up | 3.54E-12  | 1.13E-11  |
| Unigene54806  | Potri.006G107500.1 | 4.5181   | 0.1082 | 5.3839 | Up | 2.28E-23  | 1.14E-22  |
| Unigene117175 | Potri.004G033300.1 | 379.6218 | 9.0964 | 5.3831 | Up | 0         | 0         |
| Unigene107042 | Potri.014G184200.1 | 205.567  | 4.9307 | 5.3817 | Up | 0         | 0         |
| Unigene34276  | Potri.016G120000.1 | 577.42   | 13.934 | 5.3729 | Up | 0         | 0         |
| Unigene90703  | Potri.001G057800.2 | 16.9804  | 0.4111 | 5.3682 | Up | 4.52E-45  | 3.97E-44  |
| Unigene56135  | Potri.001G243600.1 | 7.5822   | 0.1845 | 5.3609 | Up | 1.56E-77  | 2.47E-76  |
| Unigene63997  | Potri.004G039900.2 | 5.5585   | 0.1355 | 5.3583 | Up | 1.27E-55  | 1.39E-54  |
| Unigene94154  | Potri.005G116600.2 | 12.8369  | 0.3131 | 5.3575 | Up | 1.92E-66  | 2.55E-65  |
| Unigene86899  | Potri.005G113600.1 | 10.657   | 0.2609 | 5.3522 | Up | 8.13E-23  | 3.97E-22  |
| Unigene87739  | Potri.010G109900.3 | 15.3861  | 0.3767 | 5.3521 | Up | 1.11E-33  | 7.47E-33  |
| Unigene77589  | Potri.005G222000.1 | 7.0741   | 0.1732 | 5.352  | Up | 6.68E-12  | 2.11E-11  |
| Unigene68529  | Potri.014G016800.5 | 5.3459   | 0.1309 | 5.3519 | Up | 6.68E-12  | 2.11E-11  |
| Unigene76332  | Potri.012G111100.4 | 14.5883  | 0.3572 | 5.3519 | Up | 8.13E-23  | 3.97E-22  |
| Unigene65285  | Potri.006G056100.1 | 6.5386   | 0.1601 | 5.3519 | Up | 8.13E-23  | 3.97E-22  |
| Unigene92733  | Potri.006G253400.1 | 6.5779   | 0.1611 | 5.3516 | Up | 8.13E-23  | 3.97E-22  |
| Unigene59142  | Potri.007G021300.1 | 4.8862   | 0.1206 | 5.3404 | Up | 2.10E-33  | 1.40E-32  |
| Unigene27466  | Potri.014G185900.1 | 202.98   | 5.011  | 5.3401 | Up | 0         | 0         |
| Unigene69803  | Potri.013G046700.3 | 4.7098   | 0.1166 | 5.336  | Up | 1.53E-22  | 7.42E-22  |
| Unigene92796  | Potri.013G033000.2 | 19.2395  | 0.4765 | 5.3355 | Up | 2.42E-65  | 3.17E-64  |
| Unigene93089  | Potri.018G121100.2 | 6.0883   | 0.1508 | 5.3353 | Up | 1.53E-22  | 7.42E-22  |
| Unigene113416 | Potri.006G073500.1 | 545.1021 | 13.606 | 5.3242 | Up | 0         | 0         |
| Unigene109203 | Potri.010G205800.1 | 172.6636 | 4.3392 | 5.3144 | Up | 1.39E-242 | 9.21E-241 |
| Unigene92333  | Potri.006G081100.1 | 20.4392  | 0.5141 | 5.3131 | Up | 3.06E-64  | 3.92E-63  |
| Unigene86222  | Potri.010G199000.1 | 15.9677  | 0.4032 | 5.3075 | Up | 1.41E-32  | 9.18E-32  |
| Unigene66411  | Potri.013G045100.1 | 10.3779  | 0.2631 | 5.3018 | Up | 7.21E-43  | 6.04E-42  |
| Unigene68780  | Potri.014G085700.3 | 5.3555   | 0.1358 | 5.3015 | Up | 5.46E-22  | 2.59E-21  |
| Unigene94431  | Potri.002G020800.1 | 11.695   | 0.2982 | 5.2935 | Up | 6.14E-84  | 1.06E-82  |
| Unigene99514  | Potri.002G048200.1 | 51.4176  | 1.3145 | 5.2897 | Up | 2.10E-73  | 3.12E-72  |



|               |                    |          |         |        |    |           |           |
|---------------|--------------------|----------|---------|--------|----|-----------|-----------|
| Unigene58196  | Potri.010G164500.1 | 3.9263   | 0.1007  | 5.285  | Up | 2.38E-11  | 7.31E-11  |
| Unigene63430  | Potri.001G082800.2 | 3.9761   | 0.102   | 5.2847 | Up | 1.03E-21  | 4.84E-21  |
| Unigene109725 | Potri.010G226000.4 | 79.2401  | 2.037   | 5.2817 | Up | 7.11E-114 | 1.79E-112 |
| Unigene85353  | Potri.001G249200.8 | 21.6286  | 0.5581  | 5.2763 | Up | 4.83E-42  | 3.97E-41  |
| Unigene64180  | Potri.015G086400.1 | 12.2378  | 0.3158  | 5.2762 | Up | 4.83E-42  | 3.97E-41  |
| Unigene94400  | Potri.008G159000.3 | 20.1559  | 0.5208  | 5.2743 | Up | 1.51E-133 | 4.65E-132 |
| Unigene66864  | Potri.008G211100.1 | 11.5108  | 0.2981  | 5.271  | Up | 4.79E-52  | 4.89E-51  |
| Unigene54291  | Potri.007G072700.4 | 15.0285  | 0.3901  | 5.2677 | Up | 1.94E-21  | 9.04E-21  |
| Unigene80679  | Potri.016G141700.4 | 12.3835  | 0.3215  | 5.2675 | Up | 1.94E-21  | 9.04E-21  |
| Unigene87206  | Potri.014G085700.2 | 9.9226   | 0.2576  | 5.2675 | Up | 1.94E-21  | 9.04E-21  |
| Unigene92901  | Potri.014G122600.1 | 6.0114   | 0.1561  | 5.2672 | Up | 1.94E-21  | 9.04E-21  |
| Unigene68466  | Potri.T147900.2    | 5.9911   | 0.1562  | 5.2614 | Up | 1.77E-31  | 1.12E-30  |
| Unigene62665  | Potri.003G167600.1 | 7.3442   | 0.1918  | 5.2589 | Up | 1.71E-41  | 1.39E-40  |
| Unigene92748  | Potri.017G114600.5 | 3.0525   | 0.0802  | 5.2502 | Up | 4.48E-11  | 1.36E-10  |
| Unigene94414  | Potri.002G220700.1 | 5.9217   | 0.1556  | 5.2501 | Up | 3.22E-41  | 2.61E-40  |
| Unigene74566  | Potri.007G098300.1 | 28.32    | 0.7442  | 5.25   | Up | 3.22E-41  | 2.61E-40  |
| Unigene90255  | Potri.012G075800.1 | 12.1693  | 0.3198  | 5.2499 | Up | 3.34E-31  | 2.10E-30  |
| Unigene92556  | Potri.016G069000.1 | 3.1467   | 0.0827  | 5.2498 | Up | 4.48E-11  | 1.36E-10  |
| Unigene91481  | Potri.014G016000.1 | 7.2478   | 0.1905  | 5.2497 | Up | 3.65E-21  | 1.69E-20  |
| Unigene90361  | Potri.004G160400.1 | 4.0244   | 0.1058  | 5.2494 | Up | 4.48E-11  | 1.36E-10  |
| Unigene69272  | Potri.002G012900.1 | 8.0528   | 0.2129  | 5.2412 | Up | 6.07E-41  | 4.87E-40  |
| Unigene115888 | Potri.018G132600.1 | 487.8584 | 12.9072 | 5.2402 | Up | 0         | 0         |
| Unigene112425 | Potri.003G158200.2 | 256.185  | 6.7802  | 5.2397 | Up | 0         | 0         |
| Unigene93455  | Potri.013G048100.1 | 31.4373  | 0.8329  | 5.2382 | Up | 5.30E-120 | 1.43E-118 |
| Unigene109968 | Potri.014G116800.3 | 1585.316 | 42.0201 | 5.2375 | Up | 0         | 0         |
| Unigene67933  | Potri.001G321100.1 | 5.4437   | 0.1448  | 5.2325 | Up | 6.88E-21  | 3.15E-20  |
| Unigene82338  | Potri.016G141700.3 | 11.6202  | 0.3091  | 5.2324 | Up | 6.88E-21  | 3.15E-20  |
| Unigene83878  | Potri.008G157500.2 | 11.0669  | 0.2944  | 5.2323 | Up | 6.88E-21  | 3.15E-20  |
| Unigene92888  | Potri.003G095300.7 | 8.7806   | 0.2345  | 5.2267 | Up | 1.19E-30  | 7.33E-30  |
| Unigene86646  | Potri.013G141100.1 | 14.8462  | 0.3966  | 5.2263 | Up | 1.19E-30  | 7.33E-30  |
| Unigene70386  | Potri.018G131200.1 | 4.1733   | 0.1119  | 5.2209 | Up | 7.66E-60  | 9.09E-59  |
| Unigene10156  | Potri.018G126400.2 | 84.5658  | 2.2777  | 5.2144 | Up | 3.34E-137 | 1.07E-135 |
| Unigene84857  | Potri.013G059300.3 | 21.0881  | 0.568   | 5.2144 | Up | 4.05E-40  | 3.18E-39  |
| Unigene90365  | Potri.005G191000.1 | 7.8525   | 0.2115  | 5.2144 | Up | 1.29E-20  | 5.88E-20  |
| Unigene60380  | Potri.002G036000.2 | 5.235    | 0.141   | 5.2144 | Up | 8.45E-11  | 2.52E-10  |
| Unigene87319  | Potri.004G160700.1 | 9.5031   | 0.256   | 5.2142 | Up | 1.29E-20  | 5.88E-20  |
| Unigene85954  | Potri.015G126400.1 | 40.1978  | 1.0861  | 5.2099 | Up | 1.02E-78  | 1.64E-77  |
| Unigene69088  | Potri.001G047900.4 | 8.2526   | 0.2231  | 5.2091 | Up | 5.23E-69  | 7.25E-68  |

|               |                    |           |         |        |    |           |           |
|---------------|--------------------|-----------|---------|--------|----|-----------|-----------|
| Unigene44055  | Potri.009G099000.1 | 354.333   | 9.5887  | 5.2076 | Up | 0         | 0         |
| Unigene66163  | Potri.002G112900.1 | 6.3004    | 0.1711  | 5.2025 | Up | 5.10E-59  | 5.96E-58  |
| Unigene104856 | Potri.008G005900.3 | 263.8943  | 7.187   | 5.1984 | Up | 0         | 0         |
| Unigene94073  | Potri.002G140900.1 | 4.0091    | 0.1093  | 5.1969 | Up | 2.44E-20  | 1.10E-19  |
| Unigene89217  | Potri.001G072600.1 | 58.9333   | 1.6074  | 5.1963 | Up | 2.79E-135 | 8.72E-134 |
| Unigene70023  | Potri.009G080600.2 | 3.3676    | 0.0919  | 5.1955 | Up | 2.44E-20  | 1.10E-19  |
| Unigene69341  | Potri.019G102200.1 | 9.9112    | 0.2707  | 5.1943 | Up | 2.51E-87  | 4.54E-86  |
| Unigene92725  | Potri.003G038000.1 | 35.4271   | 0.9683  | 5.1933 | Up | 6.94E-116 | 1.79E-114 |
| Unigene26385  | Potri.014G095700.1 | 54.1187   | 1.4792  | 5.1932 | Up | 6.94E-116 | 1.79E-114 |
| Unigene36942  | Potri.006G233900.1 | 41.6318   | 1.1384  | 5.1926 | Up | 9.33E-97  | 1.91E-95  |
| Unigene91720  | Potri.014G076000.1 | 10.0948   | 0.2765  | 5.1902 | Up | 7.90E-30  | 4.77E-29  |
| Unigene110846 | Potri.003G113400.4 | 1046.8521 | 28.8555 | 5.1811 | Up | 0         | 0         |
| Unigene105068 | Potri.004G082100.3 | 498.6966  | 13.7491 | 5.1808 | Up | 0         | 0         |
| Unigene43602  | Potri.001G154200.1 | 176.859   | 4.8783  | 5.1801 | Up | 0         | 0         |
| Unigene87364  | Potri.006G216500.2 | 9.2361    | 0.2551  | 5.1781 | Up | 4.59E-20  | 2.04E-19  |
| Unigene81357  | Potri.005G241100.4 | 5.7271    | 0.1582  | 5.178  | Up | 1.59E-10  | 4.67E-10  |
| Unigene71477  | Potri.008G160100.1 | 21.4978   | 0.5939  | 5.1778 | Up | 1.49E-29  | 8.91E-29  |
| Unigene25509  | Potri.001G372600.1 | 6.8295    | 0.1887  | 5.1776 | Up | 4.59E-20  | 2.04E-19  |
| Unigene33231  | Potri.019G083800.1 | 218.0652  | 6.0432  | 5.1733 | Up | 0         | 0         |
| Unigene93327  | Potri.017G038400.1 | 15.464    | 0.429   | 5.1718 | Up | 1.20E-57  | 1.37E-56  |
| Unigene69733  | Potri.008G047600.2 | 4.3081    | 0.1202  | 5.1635 | Up | 6.30E-48  | 5.90E-47  |
| Unigene8671   | Potri.001G304100.1 | 25.9524   | 0.7262  | 5.1594 | Up | 4.24E-57  | 4.79E-56  |
| Unigene64339  | Potri.005G257900.3 | 4.4806    | 0.1254  | 5.1591 | Up | 8.63E-20  | 3.81E-19  |
| Unigene91839  | Potri.001G393800.1 | 29.1983   | 0.8183  | 5.1571 | Up | 7.37E-85  | 1.29E-83  |
| Unigene93605  | Potri.008G112800.1 | 14.1566   | 0.3979  | 5.1529 | Up | 7.98E-57  | 8.95E-56  |
| Unigene66808  | Potri.002G049200.2 | 13.6575   | 0.3842  | 5.1517 | Up | 9.68E-94  | 1.90E-92  |
| Unigene94314  | Potri.010G148300.1 | 22.8583   | 0.6444  | 5.1486 | Up | 2.40E-130 | 7.16E-129 |
| Unigene78761  | Potri.018G081900.1 | 5.9554    | 0.1688  | 5.1408 | Up | 2.99E-10  | 8.66E-10  |
| Unigene83182  | Potri.017G056800.7 | 37.1599   | 1.0535  | 5.1405 | Up | 1.92E-65  | 2.52E-64  |
| Unigene83197  | Potri.013G084000.1 | 5.3086    | 0.1505  | 5.1405 | Up | 2.99E-10  | 8.66E-10  |
| Unigene59578  | Potri.012G108200.1 | 3.1497    | 0.0893  | 5.1404 | Up | 2.99E-10  | 8.66E-10  |
| Unigene63427  | Potri.001G383800.4 | 4.9733    | 0.141   | 5.1404 | Up | 2.99E-10  | 8.66E-10  |
| Unigene65048  | Potri.001G222200.5 | 3.625     | 0.1028  | 5.1401 | Up | 2.99E-10  | 8.66E-10  |
| Unigene88537  | Potri.010G158900.3 | 4.231     | 0.12    | 5.1399 | Up | 2.99E-10  | 8.66E-10  |
| Unigene118202 | Potri.010G183700.1 | 1123.9298 | 32.3418 | 5.119  | Up | 0         | 0         |
| Unigene111807 | Potri.006G070900.3 | 1252.3798 | 36.2689 | 5.1098 | Up | 0         | 0         |
| Unigene108259 | Potri.018G031500.1 | 107.7341  | 3.1212  | 5.1092 | Up | 2.92E-144 | 9.91E-143 |
| Unigene90107  | Potri.001G023000.2 | 25.9997   | 0.7541  | 5.1076 | Up | 8.45E-64  | 1.08E-62  |

|               |                    |           |         |        |    |           |           |
|---------------|--------------------|-----------|---------|--------|----|-----------|-----------|
| Unigene69856  | Potri.001G406100.1 | 12.5865   | 0.3651  | 5.1074 | Up | 3.07E-126 | 8.79E-125 |
| Unigene89560  | Potri.009G111500.1 | 3.855     | 0.1122  | 5.1026 | Up | 5.63E-10  | 1.61E-09  |
| Unigene93561  | Potri.007G098300.1 | 9.2159    | 0.2683  | 5.1022 | Up | 7.90E-37  | 5.75E-36  |
| Unigene68948  | Potri.006G081100.3 | 7.4398    | 0.2166  | 5.1022 | Up | 7.90E-37  | 5.75E-36  |
| Unigene59438  | Potri.004G212900.1 | 6.9004    | 0.2009  | 5.1021 | Up | 5.73E-19  | 2.46E-18  |
| Unigene94084  | Potri.017G017800.1 | 3.7401    | 0.1089  | 5.102  | Up | 5.73E-19  | 2.46E-18  |
| Unigene63512  | Potri.014G037000.1 | 7.569     | 0.2204  | 5.1019 | Up | 6.56E-28  | 3.75E-27  |
| Unigene75534  | Potri.019G124100.1 | 12.4894   | 0.3637  | 5.1018 | Up | 5.73E-19  | 2.46E-18  |
| Unigene60881  | Potri.014G188100.1 | 10.9748   | 0.3196  | 5.1018 | Up | 7.90E-37  | 5.75E-36  |
| Unigene69294  | Potri.011G031600.2 | 6.8918    | 0.2007  | 5.1018 | Up | 7.90E-37  | 5.75E-36  |
| Unigene90174  | Potri.003G169100.1 | 3.6802    | 0.1072  | 5.1014 | Up | 5.63E-10  | 1.61E-09  |
| Unigene16360  | Potri.006G250900.1 | 33.0431   | 0.9654  | 5.0971 | Up | 3.86E-72  | 5.61E-71  |
| Unigene101442 | Potri.016G141000.1 | 37.2322   | 1.088   | 5.0968 | Up | 5.10E-134 | 1.58E-132 |
| Unigene98477  | Potri.005G195000.1 | 176.9002  | 5.17    | 5.0966 | Up | 0         | 0         |
| Unigene79579  | Potri.009G059100.1 | 33.9226   | 0.9922  | 5.0955 | Up | 2.33E-54  | 2.48E-53  |
| Unigene110684 | Potri.001G303600.1 | 665.5897  | 19.4675 | 5.0955 | Up | 0         | 0         |
| Unigene92059  | Potri.009G101900.1 | 36.3938   | 1.0645  | 5.0954 | Up | 2.16E-107 | 5.04E-106 |
| Unigene35426  | Potri.016G120000.1 | 440.8327  | 12.9251 | 5.092  | Up | 0         | 0         |
| Unigene63978  | Potri.001G067300.4 | 4.4356    | 0.1303  | 5.0892 | Up | 1.23E-27  | 6.98E-27  |
| Unigene93788  | Potri.001G129600.1 | 6.3612    | 0.1869  | 5.089  | Up | 1.23E-27  | 6.98E-27  |
| Unigene103708 | Potri.010G198100.4 | 147.2408  | 4.3348  | 5.0861 | Up | 0         | 0         |
| Unigene91691  | Potri.005G186700.1 | 6.2884    | 0.1856  | 5.0824 | Up | 1.08E-18  | 4.57E-18  |
| Unigene94329  | Potri.001G085700.1 | 6.1188    | 0.1806  | 5.0824 | Up | 2.79E-36  | 2.00E-35  |
| Unigene87172  | Potri.009G101900.1 | 26.1814   | 0.7728  | 5.0823 | Up | 8.20E-54  | 8.66E-53  |
| Unigene85748  | Potri.008G055900.2 | 9.2931    | 0.2743  | 5.0823 | Up | 1.08E-18  | 4.57E-18  |
| Unigene68035  | Potri.002G157400.1 | 5.033     | 0.1486  | 5.0819 | Up | 1.08E-18  | 4.57E-18  |
| Unigene93873  | Potri.010G044100.2 | 4.0945    | 0.1209  | 5.0818 | Up | 1.08E-18  | 4.57E-18  |
| Unigene113146 | Potri.008G073600.2 | 1408.7639 | 41.6261 | 5.0808 | Up | 0         | 0         |
| Unigene112052 | Potri.001G154200.2 | 193.3646  | 5.7167  | 5.08   | Up | 7.00E-298 | 6.15E-296 |
| Unigene71863  | Potri.016G126700.2 | 19.8324   | 0.5881  | 5.0757 | Up | 2.31E-27  | 1.30E-26  |
| Unigene68706  | Potri.005G071000.1 | 10.7953   | 0.3208  | 5.0726 | Up | 9.00E-71  | 1.28E-69  |
| Unigene118166 | Potri.003G115400.2 | 284.3075  | 8.4652  | 5.0698 | Up | 0         | 0         |
| Unigene116360 | Potri.006G088000.2 | 801.3501  | 23.9077 | 5.0669 | Up | 0         | 0         |
| Unigene89001  | Potri.008G053100.5 | 3.8809    | 0.1161  | 5.063  | Up | 1.06E-09  | 2.97E-09  |
| Unigene88458  | Potri.009G144100.2 | 4.0203    | 0.1203  | 5.0626 | Up | 1.06E-09  | 2.97E-09  |
| Unigene55192  | Potri.014G161300.7 | 6.5662    | 0.1965  | 5.0625 | Up | 2.02E-18  | 8.49E-18  |
| Unigene92290  | Potri.014G141500.2 | 5.7507    | 0.1721  | 5.0624 | Up | 2.02E-18  | 8.49E-18  |
| Unigene57233  | Potri.006G073600.2 | 3.6688    | 0.1098  | 5.0624 | Up | 1.06E-09  | 2.97E-09  |

|               |                    |           |         |        |    |           |           |
|---------------|--------------------|-----------|---------|--------|----|-----------|-----------|
| Unigene69782  | Potri.001G115000.1 | 6.5422    | 0.1958  | 5.0623 | Up | 9.82E-36  | 6.94E-35  |
| Unigene94283  | Potri.019G083500.1 | 3.1707    | 0.0949  | 5.0622 | Up | 2.02E-18  | 8.49E-18  |
| Unigene8887   | Potri.016G011500.1 | 113.5874  | 3.4411  | 5.0448 | Up | 0         | 0         |
| Unigene112487 | Potri.003G088500.1 | 2611.8895 | 79.3782 | 5.0402 | Up | 0         | 0         |
| Unigene91944  | Potri.001G254600.4 | 23.6147   | 0.7192  | 5.0371 | Up | 7.36E-69  | 1.02E-67  |
| Unigene78005  | Potri.012G001500.1 | 5.579     | 0.1717  | 5.022  | Up | 1.99E-09  | 5.49E-09  |
| Unigene65428  | Potri.008G150500.2 | 4.5968    | 0.1415  | 5.0218 | Up | 7.13E-18  | 2.93E-17  |
| Unigene79149  | Potri.013G083900.1 | 10.879    | 0.3349  | 5.0217 | Up | 7.13E-18  | 2.93E-17  |
| Unigene73392  | Potri.016G139100.4 | 6.1871    | 0.1905  | 5.0214 | Up | 1.99E-09  | 5.49E-09  |
| Unigene64238  | Potri.012G042200.6 | 5.0308    | 0.1549  | 5.0214 | Up | 7.13E-18  | 2.93E-17  |
| Unigene94178  | Potri.004G050000.1 | 5.0147    | 0.1544  | 5.0214 | Up | 2.87E-26  | 1.56E-25  |
| Unigene69488  | Potri.001G138600.1 | 5.0666    | 0.156   | 5.0214 | Up | 2.36E-51  | 2.38E-50  |
| Unigene59629  | Potri.T028100.1    | 3.3218    | 0.1023  | 5.0211 | Up | 1.99E-09  | 5.49E-09  |
| Unigene40591  | Potri.006G083600.4 | 26.5626   | 0.8223  | 5.0136 | Up | 1.51E-125 | 4.28E-124 |
| Unigene69254  | Potri.011G146400.1 | 9.8456    | 0.306   | 5.0079 | Up | 8.31E-51  | 8.25E-50  |
| Unigene91570  | Potri.008G030800.1 | 33.194    | 1.0352  | 5.0029 | Up | 1.11E-91  | 2.12E-90  |
| Unigene93547  | Potri.014G013500.5 | 4.311     | 0.1346  | 5.0013 | Up | 1.34E-17  | 5.44E-17  |
| Unigene76886  | Potri.002G013500.1 | 11.288    | 0.3525  | 5.001  | Up | 1.34E-17  | 5.44E-17  |
| Unigene90246  | Potri.009G056700.1 | 6.8449    | 0.2138  | 5.0007 | Up | 1.34E-17  | 5.44E-17  |
| Unigene67409  | Potri.006G119000.1 | 6.5823    | 0.2056  | 5.0007 | Up | 1.34E-17  | 5.44E-17  |
| Unigene83972  | Potri.006G166800.1 | 14.0214   | 0.44    | 4.994  | Up | 1.01E-25  | 5.40E-25  |
| Unigene84839  | Potri.002G246300.4 | 13.6236   | 0.4275  | 4.994  | Up | 1.01E-25  | 5.40E-25  |
| Unigene89599  | Potri.001G186800.3 | 24.8317   | 0.7836  | 4.9859 | Up | 4.63E-58  | 5.31E-57  |
| Unigene65491  | Potri.019G037300.1 | 5.9123    | 0.1873  | 4.9803 | Up | 1.50E-33  | 1.00E-32  |
| Unigene80641  | Potri.007G024600.1 | 20.3724   | 0.6455  | 4.9801 | Up | 1.50E-33  | 1.00E-32  |
| Unigene87815  | Potri.014G020200.1 | 3.9385    | 0.1248  | 4.98   | Up | 3.74E-09  | 1.01E-08  |
| Unigene86709  | Potri.008G115200.2 | 8.316     | 0.2635  | 4.98   | Up | 2.51E-17  | 1.01E-16  |
| Unigene69536  | Potri.003G198600.3 | 6.8736    | 0.2178  | 4.98   | Up | 2.51E-17  | 1.01E-16  |
| Unigene84897  | Potri.011G167500.1 | 4.4812    | 0.142   | 4.9799 | Up | 3.74E-09  | 1.01E-08  |
| Unigene67086  | Potri.011G112300.1 | 3.3639    | 0.1066  | 4.9799 | Up | 3.74E-09  | 1.01E-08  |
| Unigene66341  | Potri.001G402400.1 | 6.2166    | 0.197   | 4.9799 | Up | 3.74E-09  | 1.01E-08  |
| Unigene92537  | Potri.009G027700.1 | 36.6818   | 1.1648  | 4.9769 | Up | 6.02E-114 | 1.52E-112 |
| Unigene101289 | Potri.004G213400.1 | 516.4149  | 16.4137 | 4.9756 | Up | 0         | 0         |
| Unigene83339  | Potri.011G046400.1 | 42.2913   | 1.3445  | 4.9752 | Up | 1.19E-73  | 1.78E-72  |
| Unigene70194  | Potri.008G172200.4 | 8.3343    | 0.265   | 4.975  | Up | 1.19E-73  | 1.78E-72  |
| Unigene60504  | Potri.004G141200.1 | 6.6361    | 0.2113  | 4.973  | Up | 1.92E-49  | 1.86E-48  |
| Unigene92628  | Potri.003G067900.2 | 15.4212   | 0.4911  | 4.9728 | Up | 1.92E-49  | 1.86E-48  |
| Unigene23316  | Potri.001G090500.1 | 81.9031   | 2.6083  | 4.9727 | Up | 0         | 0         |

|               |                     |           |         |        |    |           |           |
|---------------|---------------------|-----------|---------|--------|----|-----------|-----------|
| Unigene66738  | Potri.006G234600.2  | 6.9338    | 0.2227  | 4.9605 | Up | 1.10E-88  | 2.03E-87  |
| Unigene67556  | Potri.014G044300.2  | 9.6118    | 0.3091  | 4.9587 | Up | 4.70E-17  | 1.87E-16  |
| Unigene91743  | Potri.004G074900.2  | 5.7187    | 0.1839  | 4.9587 | Up | 4.70E-17  | 1.87E-16  |
| Unigene56632  | Potri.002G079300.1  | 7.4303    | 0.239   | 4.9583 | Up | 6.75E-49  | 6.44E-48  |
| Unigene94214  | Potri.004G226300.2  | 3.1238    | 0.1005  | 4.958  | Up | 4.70E-17  | 1.87E-16  |
| Unigene69876  | Potri.015G081700.1  | 10.0045   | 0.3222  | 4.9565 | Up | 2.07E-88  | 3.79E-87  |
| Unigene69944  | Potri.006G104200.1  | 8.0444    | 0.2597  | 4.9531 | Up | 1.71E-64  | 2.20E-63  |
| Unigene107415 | Potri.016G003400.3  | 571.9886  | 18.4852 | 4.9515 | Up | 0         | 0         |
| Unigene91278  | Potri.006G219400.2  | 18.0627   | 0.5838  | 4.9514 | Up | 1.26E-48  | 1.20E-47  |
| Unigene94510  | Potri.009G044800.1  | 13.8194   | 0.448   | 4.9471 | Up | 2.17E-205 | 1.17E-203 |
| Unigene52135  | Potri.006G021600.2  | 1370.8949 | 44.5958 | 4.9421 | Up | 0         | 0         |
| Unigene119453 | Potri.004G086900.1  | 358.8282  | 11.7103 | 4.9374 | Up | 0         | 0         |
| Unigene56619  | Potri.006G266100.2  | 4.0225    | 0.1313  | 4.9372 | Up | 7.01E-09  | 1.87E-08  |
| Unigene87585  | Potri.008G026900.5  | 7.7414    | 0.2527  | 4.9371 | Up | 8.81E-17  | 3.47E-16  |
| Unigene85211  | Potri.013G092100.4  | 4.3038    | 0.1405  | 4.937  | Up | 7.01E-09  | 1.87E-08  |
| Unigene91941  | Potri.008G078200.2  | 5.5073    | 0.1798  | 4.9369 | Up | 8.81E-17  | 3.47E-16  |
| Unigene91522  | Potri.003G138000.2  | 5.7924    | 0.1891  | 4.9369 | Up | 8.81E-17  | 3.47E-16  |
| Unigene66463  | Potri.014G092600.2  | 5.2156    | 0.1703  | 4.9367 | Up | 7.01E-09  | 1.87E-08  |
| Unigene73331  | Potri.T078200.1     | 5.8614    | 0.1914  | 4.9366 | Up | 7.01E-09  | 1.87E-08  |
| Unigene87890  | Potri.007G097900.3  | 7.5981    | 0.2481  | 4.9366 | Up | 8.81E-17  | 3.47E-16  |
| Unigene90557  | Potri.004G102500.3  | 28.5061   | 0.937   | 4.9271 | Up | 6.32E-71  | 9.00E-70  |
| Unigene58851  | Potri.005G179100.2  | 6.2166    | 0.2045  | 4.926  | Up | 3.47E-32  | 2.24E-31  |
| Unigene98110  | Potri.014G024500.1  | 353.023   | 11.6376 | 4.9229 | Up | 0         | 0         |
| Unigene64429  | Potri.013G047400.2  | 3.624     | 0.1201  | 4.9153 | Up | 1.65E-16  | 6.42E-16  |
| Unigene64583  | Potri.004G189900.1  | 7.2372    | 0.2399  | 4.9149 | Up | 1.65E-16  | 6.42E-16  |
| Unigene68391  | Potri.015G057400.2  | 7.4599    | 0.2473  | 4.9148 | Up | 1.65E-16  | 6.42E-16  |
| Unigene76580  | Potri.001G013200.2  | 10.6805   | 0.3541  | 4.9147 | Up | 1.65E-16  | 6.42E-16  |
| Unigene75863  | Potri.010G061700.1  | 21.5769   | 0.7208  | 4.9037 | Up | 1.21E-31  | 7.72E-31  |
| Unigene68317  | Potri.002G067000.1  | 12.8319   | 0.4296  | 4.9006 | Up | 1.34E-84  | 2.34E-83  |
| Unigene93790  | Potri.006G128300.1  | 11.161    | 0.3738  | 4.9001 | Up | 1.02E-46  | 9.27E-46  |
| Unigene94116  | Potri.006G071000.1  | 31.9284   | 1.0716  | 4.897  | Up | 3.41E-152 | 1.25E-150 |
| Unigene90687  | Potri.011G146600.1  | 3.0605    | 0.103   | 4.8931 | Up | 1.31E-08  | 3.45E-08  |
| Unigene68608  | Potri.006G145900.1  | 4.1324    | 0.1391  | 4.8928 | Up | 1.90E-46  | 1.72E-45  |
| Unigene92739  | Potri.003G131500.2  | 7.1615    | 0.2411  | 4.8926 | Up | 8.17E-24  | 4.12E-23  |
| Unigene65223  | Potri.019G054900.3  | 6.7244    | 0.2264  | 4.8925 | Up | 3.09E-16  | 1.19E-15  |
| Unigene66085  | Potri.018G003700.11 | 3.8256    | 0.1288  | 4.8925 | Up | 1.31E-08  | 3.45E-08  |
| Unigene82730  | Potri.011G107900.3  | 4.5383    | 0.1528  | 4.8924 | Up | 1.31E-08  | 3.45E-08  |
| Unigene94375  | Potri.012G046600.1  | 5.0098    | 0.1687  | 4.8922 | Up | 2.27E-31  | 1.43E-30  |

|               |                    |           |         |        |    |           |           |
|---------------|--------------------|-----------|---------|--------|----|-----------|-----------|
| Unigene68605  | Potri.013G060800.1 | 4.6084    | 0.1552  | 4.8921 | Up | 8.17E-24  | 4.12E-23  |
| Unigene93250  | Potri.018G067400.1 | 19.4283   | 0.6564  | 4.8874 | Up | 9.48E-69  | 1.31E-67  |
| Unigene88608  | Potri.016G126300.1 | 14.0565   | 0.477   | 4.8811 | Up | 4.25E-31  | 2.66E-30  |
| Unigene91601  | Potri.008G017400.1 | 5.4776    | 0.1873  | 4.8701 | Up | 5.78E-16  | 2.20E-15  |
| Unigene90987  | Potri.014G029000.2 | 35.1602   | 1.2025  | 4.8698 | Up | 6.11E-90  | 1.14E-88  |
| Unigene92161  | Potri.009G101400.3 | 5.1195    | 0.1751  | 4.8698 | Up | 5.78E-16  | 2.20E-15  |
| Unigene94405  | Potri.005G071000.1 | 16.1424   | 0.5521  | 4.8698 | Up | 1.08E-104 | 2.43E-103 |
| Unigene102930 | Potri.001G286800.1 | 39.8283   | 1.3622  | 4.8698 | Up | 2.06E-60  | 2.46E-59  |
| Unigene85356  | Potri.018G020800.3 | 8.1593    | 0.2791  | 4.8696 | Up | 5.78E-16  | 2.20E-15  |
| Unigene94107  | Potri.005G239000.1 | 6.2999    | 0.2155  | 4.8696 | Up | 7.95E-31  | 4.94E-30  |
| Unigene81268  | Potri.002G091500.1 | 9.288     | 0.3177  | 4.8696 | Up | 5.78E-16  | 2.20E-15  |
| Unigene57976  | Potri.001G095100.1 | 4.5717    | 0.1564  | 4.8694 | Up | 5.78E-16  | 2.20E-15  |
| Unigene110736 | Potri.018G132600.1 | 1278.2523 | 44.097  | 4.8573 | Up | 0         | 0         |
| Unigene13780  | Potri.008G073600.1 | 114.7325  | 3.9608  | 4.8563 | Up | 0         | 0         |
| Unigene46902  | Potri.016G096300.1 | 27.2862   | 0.9439  | 4.8534 | Up | 2.41E-52  | 2.47E-51  |
| Unigene10850  | Potri.018G126400.1 | 191.9997  | 6.6486  | 4.8519 | Up | 0         | 0         |
| Unigene69121  | Potri.003G025500.1 | 3.3909    | 0.1178  | 4.8473 | Up | 2.46E-08  | 6.35E-08  |
| Unigene62543  | Potri.012G105900.2 | 3.3419    | 0.1161  | 4.8472 | Up | 2.46E-08  | 6.35E-08  |
| Unigene91618  | Potri.004G112200.1 | 5.3781    | 0.1869  | 4.8468 | Up | 1.08E-15  | 4.06E-15  |
| Unigene78574  | Potri.003G095300.6 | 19.5154   | 0.6782  | 4.8468 | Up | 2.78E-30  | 1.70E-29  |
| Unigene87201  | Potri.001G152100.3 | 3.706     | 0.1288  | 4.8467 | Up | 2.46E-08  | 6.35E-08  |
| Unigene55681  | Potri.011G018500.1 | 3.0269    | 0.1052  | 4.8466 | Up | 2.46E-08  | 6.35E-08  |
| Unigene37919  | Potri.006G070900.1 | 387.1652  | 13.4699 | 4.8451 | Up | 0         | 0         |
| Unigene91526  | Potri.009G112300.4 | 18.9569   | 0.6619  | 4.84   | Up | 8.40E-52  | 8.52E-51  |
| Unigene4902   | Potri.004G010500.2 | 28.165    | 0.9841  | 4.839  | Up | 1.52E-44  | 1.32E-43  |
| Unigene26255  | Potri.005G251300.5 | 21.4299   | 0.7488  | 4.8389 | Up | 1.52E-44  | 1.32E-43  |
| Unigene92529  | Potri.002G244400.1 | 14.2866   | 0.4992  | 4.8389 | Up | 1.52E-44  | 1.32E-43  |
| Unigene89329  | Potri.006G064300.1 | 16.2723   | 0.5692  | 4.8373 | Up | 2.78E-37  | 2.05E-36  |
| Unigene68049  | Potri.004G101800.1 | 5.501     | 0.1927  | 4.8353 | Up | 5.19E-30  | 3.15E-29  |
| Unigene105239 | Potri.003G038000.1 | 26.1218   | 0.9163  | 4.8333 | Up | 1.57E-51  | 1.58E-50  |
| Unigene25339  | Potri.019G083800.1 | 89.2525   | 3.1313  | 4.8331 | Up | 2.96E-173 | 1.27E-171 |
| Unigene90451  | Potri.005G251400.1 | 17.9194   | 0.6295  | 4.8312 | Up | 2.84E-44  | 2.45E-43  |
| Unigene90600  | Potri.006G281400.2 | 5.8641    | 0.2071  | 4.8235 | Up | 2.02E-15  | 7.51E-15  |
| Unigene71416  | Potri.005G251400.1 | 11.2082   | 0.3959  | 4.8233 | Up | 2.02E-15  | 7.51E-15  |
| Unigene91774  | Potri.010G176200.1 | 5.1947    | 0.1835  | 4.8232 | Up | 2.02E-15  | 7.51E-15  |
| Unigene69021  | Potri.009G094000.1 | 4.1444    | 0.1464  | 4.8232 | Up | 2.02E-15  | 7.51E-15  |
| Unigene95611  | Potri.006G191200.1 | 241.4276  | 8.5281  | 4.8232 | Up | 0         | 0         |
| Unigene94240  | Potri.004G054600.1 | 16.6231   | 0.5888  | 4.8193 | Up | 2.06E-86  | 3.69E-85  |

|               |                    |          |         |        |    |           |           |
|---------------|--------------------|----------|---------|--------|----|-----------|-----------|
| Unigene47891  | Potri.004G078100.1 | 503.2788 | 17.8389 | 4.8183 | Up | 0         | 0         |
| Unigene33216  | Potri.010G195100.1 | 83.4659  | 2.9932  | 4.8014 | Up | 0         | 0         |
| Unigene68854  | Potri.004G116400.3 | 3.4012   | 0.1221  | 4.7999 | Up | 4.61E-08  | 1.17E-07  |
| Unigene90035  | Potri.013G095100.1 | 6.0323   | 0.2166  | 4.7996 | Up | 3.78E-15  | 1.39E-14  |
| Unigene66690  | Potri.003G081500.1 | 5.3668   | 0.1927  | 4.7996 | Up | 3.78E-15  | 1.39E-14  |
| Unigene94396  | Potri.T134300.1    | 11.2461  | 0.4039  | 4.7993 | Up | 4.13E-71  | 5.90E-70  |
| Unigene70898  | Potri.008G108300.1 | 16.7013  | 0.5998  | 4.7993 | Up | 3.49E-22  | 1.66E-21  |
| Unigene82593  | Potri.012G077500.2 | 4.2709   | 0.1534  | 4.7992 | Up | 4.61E-08  | 1.17E-07  |
| Unigene79476  | Potri.T060000.2    | 4.6239   | 0.1661  | 4.799  | Up | 4.61E-08  | 1.17E-07  |
| Unigene64721  | Potri.014G123000.1 | 4.9975   | 0.1805  | 4.7911 | Up | 6.44E-43  | 5.40E-42  |
| Unigene68584  | Potri.004G189400.1 | 7.1476   | 0.2588  | 4.7875 | Up | 6.32E-29  | 3.72E-28  |
| Unigene92514  | Potri.012G025900.1 | 6.8873   | 0.2501  | 4.7834 | Up | 6.51E-22  | 3.08E-21  |
| Unigene93396  | Potri.013G033000.2 | 15.4816  | 0.563   | 4.7813 | Up | 2.42E-56  | 2.68E-55  |
| Unigene106915 | Potri.009G039100.1 | 122.5333 | 4.465   | 4.7784 | Up | 0         | 0         |
| Unigene69433  | Potri.015G115600.1 | 10.1883  | 0.3721  | 4.7751 | Up | 9.34E-70  | 1.31E-68  |
| Unigene85027  | Potri.004G121400.2 | 7.7489   | 0.283   | 4.7751 | Up | 7.06E-15  | 2.56E-14  |
| Unigene92859  | Potri.007G142000.1 | 4.3066   | 0.1573  | 4.775  | Up | 7.06E-15  | 2.56E-14  |
| Unigene65521  | Potri.012G082600.1 | 5.3028   | 0.1937  | 4.7749 | Up | 7.06E-15  | 2.56E-14  |
| Unigene66493  | Potri.001G061100.1 | 5.2856   | 0.1941  | 4.7672 | Up | 1.22E-21  | 5.71E-21  |
| Unigene102264 | Potri.019G120600.1 | 219.0153 | 8.0558  | 4.7649 | Up | 0         | 0         |
| Unigene54023  | Potri.001G382900.1 | 3.6067   | 0.1328  | 4.7634 | Up | 2.20E-28  | 1.28E-27  |
| Unigene70266  | Potri.001G042500.1 | 6.8509   | 0.2523  | 4.7631 | Up | 2.20E-28  | 1.28E-27  |
| Unigene92673  | Potri.015G111700.1 | 26.4488  | 0.9742  | 4.7628 | Up | 1.28E-82  | 2.17E-81  |
| Unigene72756  | Potri.001G303600.1 | 120.1476 | 4.4436  | 4.7569 | Up | 2.87E-156 | 1.08E-154 |
| Unigene63177  | Potri.017G117600.1 | 4.0062   | 0.1488  | 4.7508 | Up | 8.61E-08  | 2.14E-07  |
| Unigene94270  | Potri.004G129900.3 | 5.1694   | 0.192   | 4.7508 | Up | 4.11E-28  | 2.36E-27  |
| Unigene65409  | Potri.002G078900.1 | 4.5259   | 0.1681  | 4.7508 | Up | 8.61E-08  | 2.14E-07  |
| Unigene64326  | Potri.003G200500.1 | 7.4599   | 0.2771  | 4.7507 | Up | 1.32E-14  | 4.72E-14  |
| Unigene62822  | Potri.001G057500.3 | 3.8632   | 0.1435  | 4.7507 | Up | 1.32E-14  | 4.72E-14  |
| Unigene62365  | Potri.006G185000.2 | 9.3924   | 0.3489  | 4.7506 | Up | 8.30E-82  | 1.39E-80  |
| Unigene76428  | Potri.001G469600.1 | 4.7862   | 0.1778  | 4.7506 | Up | 8.61E-08  | 2.14E-07  |
| Unigene89352  | Potri.015G082400.1 | 24.5142  | 0.9107  | 4.7505 | Up | 5.46E-55  | 5.89E-54  |
| Unigene78107  | Potri.015G071800.2 | 4.6029   | 0.171   | 4.7505 | Up | 8.61E-08  | 2.14E-07  |
| Unigene73288  | Potri.006G104500.3 | 10.3018  | 0.3827  | 4.7505 | Up | 1.32E-14  | 4.72E-14  |
| Unigene91729  | Potri.005G258700.4 | 7.4428   | 0.2765  | 4.7505 | Up | 2.27E-21  | 1.06E-20  |
| Unigene74735  | Potri.010G229900.2 | 9.9695   | 0.3704  | 4.7504 | Up | 1.32E-14  | 4.72E-14  |
| Unigene54618  | Potri.008G031800.1 | 4.3793   | 0.1627  | 4.7504 | Up | 8.61E-08  | 2.14E-07  |
| Unigene71600  | Potri.005G196700.4 | 10.6048  | 0.394   | 4.7504 | Up | 1.32E-14  | 4.72E-14  |

|               |                    |         |        |        |    |           |           |
|---------------|--------------------|---------|--------|--------|----|-----------|-----------|
| Unigene84870  | Potri.004G072800.3 | 3.8222  | 0.142  | 4.7504 | Up | 8.61E-08  | 2.14E-07  |
| Unigene83954  | Potri.002G112900.1 | 23.6866 | 0.88   | 4.7504 | Up | 1.46E-41  | 1.18E-40  |
| Unigene66763  | Potri.001G104200.1 | 4.3383  | 0.1612 | 4.7502 | Up | 2.27E-21  | 1.06E-20  |
| Unigene92113  | Potri.001G393600.1 | 4.7442  | 0.1763 | 4.7501 | Up | 1.32E-14  | 4.72E-14  |
| Unigene94507  | Potri.002G256500.1 | 6.4569  | 0.2406 | 4.7461 | Up | 7.78E-75  | 1.18E-73  |
| Unigene92049  | Potri.005G071000.1 | 21.4555 | 0.8001 | 4.745  | Up | 1.99E-61  | 2.43E-60  |
| Unigene112978 | Potri.004G034100.2 | 51.8299 | 1.9366 | 4.7422 | Up | 2.89E-81  | 4.81E-80  |
| Unigene24942  | Potri.001G137100.1 | 57.2736 | 2.14   | 4.7422 | Up | 3.52E-121 | 9.62E-120 |
| Unigene72263  | Potri.016G069700.7 | 26.0735 | 0.9754 | 4.7404 | Up | 1.43E-34  | 9.78E-34  |
| Unigene69943  | Potri.004G101800.1 | 8.8713  | 0.3323 | 4.7386 | Up | 3.25E-114 | 8.23E-113 |
| Unigene94471  | Potri.010G252900.7 | 5.2803  | 0.1984 | 4.7341 | Up | 5.06E-41  | 4.07E-40  |
| Unigene4351   | Potri.019G102200.1 | 10.5403 | 0.3961 | 4.7339 | Up | 6.93E-61  | 8.36E-60  |
| Unigene86247  | Potri.016G050500.1 | 7.1106  | 0.2688 | 4.7254 | Up | 2.46E-14  | 8.70E-14  |
| Unigene78379  | Potri.014G024600.1 | 9.0088  | 0.3406 | 4.7252 | Up | 2.46E-14  | 8.70E-14  |
| Unigene89581  | Potri.002G192300.1 | 5.9222  | 0.2239 | 4.7252 | Up | 2.46E-14  | 8.70E-14  |
| Unigene91036  | Potri.005G070100.3 | 23.694  | 0.8974 | 4.7226 | Up | 2.41E-60  | 2.88E-59  |
| Unigene94045  | Potri.009G020900.1 | 4.3851  | 0.1667 | 4.7173 | Up | 7.89E-21  | 3.61E-20  |
| Unigene81497  | Potri.012G035400.3 | 16.5288 | 0.6304 | 4.7126 | Up | 2.66E-27  | 1.49E-26  |
| Unigene93761  | Potri.006G200900.3 | 8.2176  | 0.3139 | 4.7103 | Up | 9.25E-34  | 6.21E-33  |
| Unigene60735  | Potri.001G138500.2 | 8.6076  | 0.3288 | 4.7103 | Up | 9.25E-34  | 6.21E-33  |
| Unigene88821  | Potri.016G023500.2 | 3.0627  | 0.1178 | 4.7004 | Up | 1.61E-07  | 3.93E-07  |
| Unigene65585  | Potri.014G072500.1 | 6.1555  | 0.2368 | 4.7001 | Up | 1.47E-20  | 6.67E-20  |
| Unigene65110  | Potri.008G028400.1 | 4.7257  | 0.1818 | 4.7001 | Up | 1.61E-07  | 3.93E-07  |
| Unigene84308  | Potri.014G029000.3 | 11.3111 | 0.4352 | 4.6999 | Up | 1.47E-20  | 6.67E-20  |
| Unigene67201  | Potri.012G003800.1 | 3.2384  | 0.1246 | 4.6999 | Up | 4.59E-14  | 1.61E-13  |
| Unigene85107  | Potri.003G113500.2 | 10.9936 | 0.423  | 4.6999 | Up | 1.47E-20  | 6.67E-20  |
| Unigene89785  | Potri.T059500.1    | 5.7384  | 0.2208 | 4.6998 | Up | 4.59E-14  | 1.60E-13  |
| Unigene93433  | Potri.002G223700.2 | 3.6201  | 0.1393 | 4.6998 | Up | 4.59E-14  | 1.60E-13  |
| Unigene88777  | Potri.018G125300.3 | 3.0717  | 0.1182 | 4.6997 | Up | 1.61E-07  | 3.93E-07  |
| Unigene93968  | Potri.005G068400.4 | 6.0109  | 0.2313 | 4.6997 | Up | 4.96E-27  | 2.76E-26  |
| Unigene67211  | Potri.002G067400.1 | 3.3854  | 0.1303 | 4.6994 | Up | 4.59E-14  | 1.61E-13  |
| Unigene2340   | Potri.018G047300.1 | 27.8276 | 1.0775 | 4.6908 | Up | 6.84E-110 | 1.65E-108 |
| Unigene85051  | Potri.001G138500.1 | 40.189  | 1.5565 | 4.6904 | Up | 1.36E-71  | 1.96E-70  |
| Unigene87164  | Potri.002G048200.1 | 16.6174 | 0.644  | 4.6895 | Up | 3.21E-33  | 2.13E-32  |
| Unigene68053  | Potri.005G253300.1 | 5.8644  | 0.2277 | 4.6868 | Up | 9.24E-27  | 5.11E-26  |
| Unigene80966  | Potri.002G113000.2 | 24.5703 | 0.9568 | 4.6826 | Up | 2.12E-39  | 1.64E-38  |
| Unigene70183  | Potri.001G152100.3 | 5.4409  | 0.2119 | 4.6824 | Up | 2.74E-20  | 1.23E-19  |
| Unigene94256  | Potri.001G123500.1 | 9.9556  | 0.3883 | 4.6803 | Up | 5.12E-52  | 5.21E-51  |



|               |                    |           |          |        |    |           |           |
|---------------|--------------------|-----------|----------|--------|----|-----------|-----------|
| Unigene59040  | Potri.001G375500.2 | 4.103     | 0.1607   | 4.6742 | Up | 8.56E-14  | 2.96E-13  |
| Unigene89518  | Potri.010G198800.8 | 5.7464    | 0.2251   | 4.674  | Up | 8.56E-14  | 2.96E-13  |
| Unigene88492  | Potri.005G017100.3 | 6.1421    | 0.2406   | 4.674  | Up | 8.56E-14  | 2.96E-13  |
| Unigene79529  | Potri.001G205800.9 | 8.4423    | 0.3307   | 4.674  | Up | 8.56E-14  | 2.96E-13  |
| Unigene82484  | Potri.007G065500.4 | 15.6601   | 0.6135   | 4.6739 | Up | 1.72E-26  | 9.43E-26  |
| Unigene91058  | Potri.006G129500.1 | 20.3116   | 0.7957   | 4.6739 | Up | 9.54E-52  | 9.66E-51  |
| Unigene60374  | Potri.006G064200.1 | 8.5478    | 0.3349   | 4.6738 | Up | 1.72E-26  | 9.43E-26  |
| Unigene63312  | Potri.001G457700.1 | 6.7817    | 0.2657   | 4.6738 | Up | 6.05E-77  | 9.50E-76  |
| Unigene91807  | Potri.010G083500.1 | 4.6624    | 0.1827   | 4.6735 | Up | 8.56E-14  | 2.96E-13  |
| Unigene6954   | Potri.006G007300.1 | 27.2681   | 1.0707   | 4.6706 | Up | 3.60E-202 | 1.89E-200 |
| Unigene68060  | Potri.010G128000.1 | 7.6612    | 0.3012   | 4.6688 | Up | 1.11E-32  | 7.28E-32  |
| Unigene86509  | Potri.001G148800.1 | 16.9207   | 0.6653   | 4.6686 | Up | 1.11E-32  | 7.28E-32  |
| Unigene71490  | Potri.005G241100.4 | 40.2394   | 1.5837   | 4.6672 | Up | 1.77E-51  | 1.79E-50  |
| Unigene71748  | Potri.001G282900.2 | 14.993    | 0.591    | 4.665  | Up | 5.10E-20  | 2.27E-19  |
| Unigene112806 | Potri.008G087200.1 | 2591.6392 | 102.1713 | 4.6648 | Up | 0         | 0         |
| Unigene34898  | Potri.018G031400.1 | 98.9524   | 3.9015   | 4.6646 | Up | 4.31E-251 | 2.98E-249 |
| Unigene115776 | Potri.001G119500.2 | 1930.815  | 76.1901  | 4.6635 | Up | 0         | 0         |
| Unigene109061 | Potri.008G073600.2 | 190.3685  | 7.5821   | 4.6501 | Up | 3.97E-248 | 2.71E-246 |
| Unigene89700  | Potri.002G059300.6 | 5.5794    | 0.2226   | 4.6476 | Up | 1.59E-13  | 5.44E-13  |
| Unigene61709  | Potri.002G247700.1 | 3.1179    | 0.1244   | 4.6475 | Up | 3.00E-07  | 7.19E-07  |
| Unigene89769  | Potri.019G054500.1 | 5.5334    | 0.2208   | 4.6474 | Up | 1.59E-13  | 5.44E-13  |
| Unigene74194  | Potri.010G223000.2 | 9.3683    | 0.3738   | 4.6474 | Up | 1.59E-13  | 5.44E-13  |
| Unigene15926  | Potri.010G120200.3 | 20.7885   | 0.8295   | 4.6474 | Up | 7.76E-57  | 8.71E-56  |
| Unigene80823  | Potri.006G139400.4 | 8.0246    | 0.3202   | 4.6474 | Up | 1.59E-13  | 5.44E-13  |
| Unigene87826  | Potri.002G131000.1 | 15.638    | 0.624    | 4.6474 | Up | 3.86E-32  | 2.49E-31  |
| Unigene73393  | Potri.002G113000.2 | 9.5459    | 0.3809   | 4.6474 | Up | 1.59E-13  | 5.44E-13  |
| Unigene75104  | Potri.012G139600.1 | 18.3943   | 0.734    | 4.6473 | Up | 5.96E-26  | 3.21E-25  |
| Unigene78611  | Potri.003G086400.3 | 8.4629    | 0.3377   | 4.6473 | Up | 1.59E-13  | 5.44E-13  |
| Unigene93727  | Potri.017G057300.1 | 4.7881    | 0.1911   | 4.6471 | Up | 9.50E-20  | 4.19E-19  |
| Unigene98578  | Potri.013G125000.1 | 4.1444    | 0.1654   | 4.6471 | Up | 3.00E-07  | 7.19E-07  |
| Unigene64434  | Potri.009G112300.1 | 5.3144    | 0.2121   | 4.6471 | Up | 1.59E-13  | 5.44E-13  |
| Unigene86920  | Potri.006G115400.2 | 3.2698    | 0.1305   | 4.6471 | Up | 3.00E-07  | 7.19E-07  |
| Unigene77734  | Potri.001G243100.3 | 4.3223    | 0.1725   | 4.6471 | Up | 3.00E-07  | 7.19E-07  |
| Unigene87584  | Potri.004G177500.1 | 3.1669    | 0.1264   | 4.647  | Up | 3.00E-07  | 7.19E-07  |
| Unigene42375  | Potri.014G156300.1 | 438.5786  | 17.5297  | 4.645  | Up | 0         | 0         |
| Unigene86865  | Potri.016G141000.1 | 94.8891   | 3.796    | 4.6437 | Up | 2.08E-179 | 9.43E-178 |
| Unigene69297  | Potri.001G279200.1 | 4.116     | 0.1653   | 4.6381 | Up | 4.73E-38  | 3.54E-37  |
| Unigene66948  | Potri.003G053600.1 | 5.9255    | 0.2382   | 4.6367 | Up | 1.83E-62  | 2.28E-61  |

|               |                    |          |         |        |    |           |           |
|---------------|--------------------|----------|---------|--------|----|-----------|-----------|
| Unigene30568  | Potri.T113400.1    | 55.5755  | 2.2375  | 4.6345 | Up | 9.99E-154 | 3.70E-152 |
| Unigene70689  | Potri.001G076800.2 | 19.9553  | 0.8037  | 4.634  | Up | 1.11E-25  | 5.93E-25  |
| Unigene63407  | Potri.001G215900.1 | 3.1156   | 0.1255  | 4.6338 | Up | 1.11E-25  | 5.93E-25  |
| Unigene66701  | Potri.001G235300.1 | 9.0698   | 0.3664  | 4.6296 | Up | 1.77E-19  | 7.72E-19  |
| Unigene94478  | Potri.001G002500.2 | 14.6876  | 0.5942  | 4.6275 | Up | 1.53E-116 | 3.98E-115 |
| Unigene116320 | Potri.013G050600.1 | 282.7661 | 11.4815 | 4.6222 | Up | 0         | 0         |
| Unigene93574  | Potri.012G134800.1 | 3.2893   | 0.1337  | 4.6207 | Up | 2.97E-13  | 1.00E-12  |
| Unigene64159  | Potri.006G210500.2 | 4.5341   | 0.1843  | 4.6207 | Up | 2.97E-13  | 1.00E-12  |
| Unigene63668  | Potri.010G052600.3 | 4.4625   | 0.1814  | 4.6206 | Up | 2.97E-13  | 1.00E-12  |
| Unigene93760  | Potri.006G202200.1 | 9.2666   | 0.3767  | 4.6206 | Up | 1.63E-37  | 1.21E-36  |
| Unigene63884  | Potri.001G138400.1 | 4.6297   | 0.1882  | 4.6206 | Up | 2.97E-13  | 1.00E-12  |
| Unigene92486  | Potri.019G090000.1 | 4.1099   | 0.1671  | 4.6203 | Up | 2.97E-13  | 1.00E-12  |
| Unigene70051  | Potri.002G027200.1 | 7.7769   | 0.3162  | 4.6203 | Up | 1.18E-61  | 1.44E-60  |
| Unigene92370  | Potri.005G204500.1 | 4.1883   | 0.1703  | 4.6202 | Up | 2.97E-13  | 1.00E-12  |
| Unigene68992  | Potri.003G148100.1 | 4.936    | 0.2007  | 4.6202 | Up | 2.06E-25  | 1.09E-24  |
| Unigene76769  | Potri.002G037400.1 | 8.7087   | 0.3541  | 4.6202 | Up | 2.97E-13  | 1.00E-12  |
| Unigene69286  | Potri.001G160200.1 | 7.0992   | 0.2894  | 4.6165 | Up | 2.03E-43  | 1.72E-42  |
| Unigene112395 | Potri.016G101700.1 | 187.2684 | 7.6385  | 4.6157 | Up | 3.30E-277 | 2.61E-275 |
| Unigene92700  | Potri.018G086900.2 | 9.9065   | 0.4043  | 4.6149 | Up | 2.48E-31  | 1.56E-30  |
| Unigene2004   | Potri.016G089400.1 | 115.0533 | 4.6983  | 4.614  | Up | 8.11E-283 | 6.59E-281 |
| Unigene116568 | Potri.001G164700.3 | 66.9775  | 2.7371  | 4.613  | Up | 4.07E-133 | 1.25E-131 |
| Unigene94445  | Potri.018G027200.1 | 5.3141   | 0.2174  | 4.6114 | Up | 3.04E-37  | 2.23E-36  |
| Unigene68793  | Potri.014G074300.1 | 4.9524   | 0.2026  | 4.6114 | Up | 3.29E-19  | 1.42E-18  |
| Unigene94332  | Potri.006G021500.1 | 16.4434  | 0.6727  | 4.6114 | Up | 4.13E-91  | 7.85E-90  |
| Unigene74719  | Potri.015G022700.2 | 13.5791  | 0.5556  | 4.6112 | Up | 3.29E-19  | 1.42E-18  |
| Unigene94505  | Potri.005G177100.2 | 3.3523   | 0.1372  | 4.6108 | Up | 3.04E-37  | 2.23E-36  |
| Unigene78475  | Potri.001G317700.1 | 16.5251  | 0.6782  | 4.6068 | Up | 3.84E-25  | 2.02E-24  |
| Unigene63622  | Potri.016G084500.2 | 9.4829   | 0.3892  | 4.6067 | Up | 3.84E-25  | 2.02E-24  |
| Unigene53980  | Potri.001G155000.1 | 5.2148   | 0.2144  | 4.6042 | Up | 4.61E-31  | 2.88E-30  |
| Unigene92099  | Potri.014G052900.1 | 10.739   | 0.4416  | 4.604  | Up | 4.61E-31  | 2.88E-30  |
| Unigene59807  | Potri.015G098100.1 | 3.1385   | 0.13    | 4.5935 | Up | 5.60E-07  | 1.31E-06  |
| Unigene60081  | Potri.001G019100.2 | 3.9104   | 0.162   | 4.5933 | Up | 5.52E-13  | 1.84E-12  |
| Unigene61549  | Potri.013G070000.2 | 3.3212   | 0.1376  | 4.5932 | Up | 5.60E-07  | 1.31E-06  |
| Unigene80056  | Potri.014G088900.1 | 7.8845   | 0.3267  | 4.593  | Up | 5.52E-13  | 1.84E-12  |
| Unigene84781  | Potri.006G271200.1 | 3.439    | 0.1425  | 4.593  | Up | 5.60E-07  | 1.31E-06  |
| Unigene40474  | Potri.004G198700.1 | 15.7689  | 0.6534  | 4.593  | Up | 1.05E-36  | 7.61E-36  |
| Unigene69981  | Potri.006G139100.2 | 7.0105   | 0.2905  | 4.5929 | Up | 1.05E-36  | 7.61E-36  |
| Unigene85086  | Potri.002G241800.1 | 6.8055   | 0.282   | 4.5929 | Up | 5.52E-13  | 1.84E-12  |

|               |                    |          |         |        |    |           |           |
|---------------|--------------------|----------|---------|--------|----|-----------|-----------|
| Unigene65831  | Potri.018G103200.1 | 3.0259   | 0.1254  | 4.5928 | Up | 5.52E-13  | 1.84E-12  |
| Unigene78390  | Potri.015G038100.1 | 4.1093   | 0.1703  | 4.5927 | Up | 5.60E-07  | 1.31E-06  |
| Unigene63900  | Potri.009G165000.2 | 3.0306   | 0.1256  | 4.5927 | Up | 5.60E-07  | 1.31E-06  |
| Unigene81054  | Potri.016G084400.1 | 3.8484   | 0.1595  | 4.5926 | Up | 5.60E-07  | 1.31E-06  |
| Unigene114599 | Potri.016G060100.1 | 599.2521 | 24.8766 | 4.5903 | Up | 0         | 0         |
| Unigene14446  | Potri.005G160300.1 | 34.445   | 1.4352  | 4.585  | Up | 2.83E-124 | 7.94E-123 |
| Unigene89413  | Potri.017G119300.1 | 16.2857  | 0.6792  | 4.5836 | Up | 1.95E-36  | 1.40E-35  |
| Unigene14443  | Potri.018G016400.2 | 47.7165  | 1.9912  | 4.5828 | Up | 6.86E-130 | 2.03E-128 |
| Unigene90596  | Potri.005G067400.1 | 27.3723  | 1.1422  | 4.5828 | Up | 1.15E-65  | 1.51E-64  |
| Unigene92051  | Potri.003G122900.1 | 8.4809   | 0.3548  | 4.5791 | Up | 1.33E-24  | 6.85E-24  |
| Unigene69599  | Potri.001G166200.4 | 7.7223   | 0.3231  | 4.579  | Up | 5.62E-48  | 5.27E-47  |
| Unigene88261  | Potri.015G037000.1 | 8.7032   | 0.3653  | 4.5744 | Up | 1.14E-18  | 4.81E-18  |
| Unigene60947  | Potri.001G148800.1 | 6.1369   | 0.2576  | 4.5743 | Up | 1.14E-18  | 4.82E-18  |
| Unigene73365  | Potri.018G132700.1 | 13.6117  | 0.5714  | 4.5742 | Up | 1.14E-18  | 4.81E-18  |
| Unigene94480  | Potri.004G160700.1 | 14.7812  | 0.6221  | 4.5705 | Up | 4.78E-117 | 1.25E-115 |
| Unigene119136 | Potri.013G018600.1 | 467.412  | 19.7186 | 4.5671 | Up | 0         | 0         |
| Unigene57629  | Potri.004G143500.2 | 5.0727   | 0.2143  | 4.5651 | Up | 1.03E-12  | 3.37E-12  |
| Unigene89493  | Potri.003G173900.1 | 5.3285   | 0.2251  | 4.5651 | Up | 1.03E-12  | 3.37E-12  |
| Unigene66432  | Potri.015G105300.4 | 5.1552   | 0.2178  | 4.565  | Up | 1.03E-12  | 3.37E-12  |
| Unigene30388  | Potri.001G273500.1 | 43.431   | 1.8349  | 4.565  | Up | 5.76E-59  | 6.73E-58  |
| Unigene92764  | Potri.006G188600.2 | 7.5637   | 0.3196  | 4.5648 | Up | 2.46E-24  | 1.26E-23  |
| Unigene51488  | Potri.003G131500.2 | 40.0068  | 1.7014  | 4.5555 | Up | 2.55E-121 | 6.95E-120 |
| Unigene84845  | Potri.001G149800.1 | 20.1047  | 0.855   | 4.5555 | Up | 1.25E-35  | 8.79E-35  |
| Unigene68309  | Potri.003G145300.2 | 6.7033   | 0.286   | 4.5508 | Up | 4.57E-24  | 2.32E-23  |
| Unigene63813  | Potri.006G124800.4 | 9.4655   | 0.4039  | 4.5506 | Up | 4.57E-24  | 2.32E-23  |
| Unigene72795  | Potri.013G079700.6 | 22.5949  | 0.966   | 4.5478 | Up | 1.02E-29  | 6.14E-29  |
| Unigene94060  | Potri.001G122300.1 | 11.5634  | 0.4961  | 4.5428 | Up | 2.90E-52  | 2.97E-51  |
| Unigene54929  | Potri.001G178900.1 | 10.9335  | 0.4691  | 4.5427 | Up | 2.90E-52  | 2.97E-51  |
| Unigene115178 | Potri.001G119500.2 | 476.3573 | 20.5171 | 4.5371 | Up | 0         | 0         |
| Unigene83504  | Potri.005G215500.1 | 3.4537   | 0.1488  | 4.5367 | Up | 1.04E-06  | 2.40E-06  |
| Unigene59898  | Potri.003G122000.1 | 4.1261   | 0.1778  | 4.5365 | Up | 1.04E-06  | 2.40E-06  |
| Unigene93814  | Potri.008G112800.1 | 7.173    | 0.3091  | 4.5364 | Up | 1.89E-29  | 1.13E-28  |
| Unigene85628  | Potri.010G201300.2 | 6.4089   | 0.2762  | 4.5363 | Up | 1.91E-12  | 6.19E-12  |
| Unigene50659  | Potri.001G411800.1 | 13.5283  | 0.583   | 4.5363 | Up | 4.07E-80  | 6.69E-79  |
| Unigene58312  | Potri.001G134100.2 | 9.0096   | 0.3883  | 4.5362 | Up | 8.49E-24  | 4.27E-23  |
| Unigene60865  | Potri.001G182000.1 | 11.9143  | 0.516   | 4.5292 | Up | 4.26E-46  | 3.83E-45  |
| Unigene4722   | Potri.014G024500.1 | 142.1331 | 6.1565  | 4.529  | Up | 0.00E+00  | 1.83E-306 |
| Unigene116478 | Potri.003G165500.1 | 89.5886  | 3.8808  | 4.5289 | Up | 1.65E-174 | 7.19E-173 |

|               |                    |           |         |        |    |           |           |
|---------------|--------------------|-----------|---------|--------|----|-----------|-----------|
| Unigene115708 | Potri.008G130500.1 | 250.0078  | 10.8609 | 4.5248 | Up | 0         | 0         |
| Unigene71263  | Potri.017G113000.1 | 13.6642   | 0.5968  | 4.517  | Up | 7.28E-18  | 2.99E-17  |
| Unigene68260  | Potri.003G120900.1 | 4.6312    | 0.2023  | 4.5168 | Up | 7.28E-18  | 2.99E-17  |
| Unigene94162  | Potri.001G071600.1 | 3.5707    | 0.156   | 4.5166 | Up | 7.28E-18  | 2.99E-17  |
| Unigene94462  | Potri.006G120100.2 | 3.9012    | 0.1709  | 4.5127 | Up | 6.51E-29  | 3.83E-28  |
| Unigene109525 | Potri.001G285500.1 | 1336.0178 | 58.6891 | 4.5087 | Up | 0         | 0         |
| Unigene62558  | Potri.014G016600.3 | 3.4484    | 0.1516  | 4.5076 | Up | 3.54E-12  | 1.13E-11  |
| Unigene63518  | Potri.014G043600.1 | 4.8738    | 0.2143  | 4.5073 | Up | 3.54E-12  | 1.13E-11  |
| Unigene32973  | Potri.011G094000.1 | 38.4816   | 1.698   | 4.5023 | Up | 1.55E-132 | 4.74E-131 |
| Unigene93621  | Potri.002G056600.1 | 11.9432   | 0.5279  | 4.4998 | Up | 5.03E-45  | 4.42E-44  |
| Unigene49387  | Potri.010G141200.1 | 15.9855   | 0.7066  | 4.4997 | Up | 5.03E-45  | 4.42E-44  |
| Unigene68684  | Potri.010G238300.5 | 5.2162    | 0.2309  | 4.4977 | Up | 1.35E-17  | 5.49E-17  |
| Unigene69159  | Potri.001G351400.1 | 7.2034    | 0.3189  | 4.4975 | Up | 1.35E-17  | 5.49E-17  |
| Unigene25258  | Potri.001G400400.1 | 96.9239   | 4.2923  | 4.497  | Up | 0         | 0         |
| Unigene66087  | Potri.004G059100.1 | 7.4599    | 0.3309  | 4.4947 | Up | 2.17E-39  | 1.67E-38  |
| Unigene94238  | Potri.004G199600.3 | 7.7707    | 0.3447  | 4.4946 | Up | 2.17E-39  | 1.67E-38  |
| Unigene26400  | Potri.T120200.1    | 14.7492   | 0.6566  | 4.4895 | Up | 2.24E-28  | 1.30E-27  |
| Unigene72569  | Potri.005G071000.3 | 26.1277   | 1.1648  | 4.4874 | Up | 9.41E-34  | 6.32E-33  |
| Unigene116366 | Potri.013G018600.1 | 205.0295  | 9.1561  | 4.485  | Up | 0         | 0         |
| Unigene77216  | Potri.016G115300.3 | 7.7843    | 0.3494  | 4.4776 | Up | 6.57E-12  | 2.08E-11  |
| Unigene77321  | Potri.014G080800.1 | 3.8921    | 0.1747  | 4.4776 | Up | 1.94E-06  | 4.36E-06  |
| Unigene55522  | Potri.002G081600.1 | 7.7506    | 0.3479  | 4.4776 | Up | 6.57E-12  | 2.08E-11  |
| Unigene82308  | Potri.004G082300.1 | 6.8861    | 0.3091  | 4.4775 | Up | 6.57E-12  | 2.08E-11  |
| Unigene35299  | Potri.001G373700.5 | 14.5559   | 0.6534  | 4.4775 | Up | 1.00E-22  | 4.88E-22  |
| Unigene83730  | Potri.T074600.1    | 6.5823    | 0.2955  | 4.4774 | Up | 6.57E-12  | 2.08E-11  |
| Unigene69180  | Potri.018G053800.5 | 3.2143    | 0.1443  | 4.4774 | Up | 6.57E-12  | 2.08E-11  |
| Unigene93379  | Potri.016G004500.1 | 6.2931    | 0.2825  | 4.4774 | Up | 1.00E-22  | 4.88E-22  |
| Unigene66806  | Potri.001G110200.1 | 6.1994    | 0.2783  | 4.4774 | Up | 4.14E-28  | 2.38E-27  |
| Unigene60596  | Potri.014G088900.1 | 3.0449    | 0.1367  | 4.4773 | Up | 1.94E-06  | 4.36E-06  |
| Unigene94088  | Potri.001G271300.1 | 7.2681    | 0.3263  | 4.4773 | Up | 1.74E-33  | 1.16E-32  |
| Unigene77422  | Potri.002G083100.1 | 80.8964   | 3.6532  | 4.4688 | Up | 5.14E-113 | 1.28E-111 |
| Unigene67614  | Potri.005G056200.1 | 4.7695    | 0.2154  | 4.4687 | Up | 1.38E-38  | 1.04E-37  |
| Unigene94115  | Potri.015G036300.3 | 7.1118    | 0.3215  | 4.4673 | Up | 3.23E-33  | 2.14E-32  |
| Unigene54398  | Potri.002G059400.1 | 3.9241    | 0.178   | 4.4624 | Up | 1.86E-22  | 8.97E-22  |
| Unigene92138  | Potri.012G056800.1 | 17.3847   | 0.7914  | 4.4573 | Up | 8.81E-49  | 8.39E-48  |
| Unigene74938  | Potri.010G120200.4 | 12.148    | 0.553   | 4.4573 | Up | 4.64E-17  | 1.85E-16  |
| Unigene113012 | Potri.005G251300.3 | 53.1781   | 2.4208  | 4.4573 | Up | 2.21E-80  | 3.65E-79  |
| Unigene92184  | Potri.009G061800.1 | 5.7571    | 0.2621  | 4.4572 | Up | 4.64E-17  | 1.85E-16  |

|               |                    |          |         |        |    |           |           |
|---------------|--------------------|----------|---------|--------|----|-----------|-----------|
| Unigene92792  | Potri.005G210700.1 | 3.4646   | 0.1588  | 4.4474 | Up | 1.22E-11  | 3.80E-11  |
| Unigene94298  | Potri.001G004700.1 | 4.0817   | 0.1871  | 4.4473 | Up | 3.44E-22  | 1.64E-21  |
| Unigene69246  | Potri.016G081000.2 | 5.074    | 0.2326  | 4.4472 | Up | 3.44E-22  | 1.64E-21  |
| Unigene68725  | Potri.006G188600.2 | 9.3249   | 0.4275  | 4.4471 | Up | 1.11E-32  | 7.24E-32  |
| Unigene89879  | Potri.013G010700.1 | 4.7768   | 0.219   | 4.447  | Up | 1.22E-11  | 3.80E-11  |
| Unigene109750 | Potri.010G059900.1 | 112.7581 | 5.1852  | 4.4427 | Up | 5.75E-147 | 2.01E-145 |
| Unigene37508  | Potri.001G348500.2 | 6.6157   | 0.3061  | 4.4338 | Up | 1.62E-37  | 1.20E-36  |
| Unigene72018  | Potri.006G022100.3 | 21.1061  | 0.9801  | 4.4286 | Up | 4.87E-27  | 2.71E-26  |
| Unigene68594  | Potri.016G124700.4 | 14.1861  | 0.6588  | 4.4285 | Up | 4.87E-27  | 2.71E-26  |
| Unigene76056  | Potri.010G120200.4 | 19.3158  | 0.897   | 4.4285 | Up | 4.87E-27  | 2.71E-26  |
| Unigene83277  | Potri.011G104100.1 | 3.2011   | 0.1499  | 4.4165 | Up | 3.60E-06  | 7.93E-06  |
| Unigene84515  | Potri.013G140100.1 | 3.0749   | 0.144   | 4.4164 | Up | 3.60E-06  | 7.93E-06  |
| Unigene66345  | Potri.009G160100.1 | 4.9475   | 0.2317  | 4.4164 | Up | 9.01E-27  | 4.98E-26  |
| Unigene79265  | Potri.006G109700.4 | 3.5597   | 0.1667  | 4.4164 | Up | 3.60E-06  | 7.93E-06  |
| Unigene84048  | Potri.019G038400.4 | 3.1196   | 0.1461  | 4.4163 | Up | 3.60E-06  | 7.93E-06  |
| Unigene54102  | Potri.010G205900.1 | 3.7408   | 0.1752  | 4.4163 | Up | 1.59E-16  | 6.19E-16  |
| Unigene68484  | Potri.008G047600.1 | 4.9446   | 0.2316  | 4.4161 | Up | 2.26E-11  | 6.95E-11  |
| Unigene85184  | Potri.006G104300.1 | 5.9992   | 0.281   | 4.4161 | Up | 2.26E-11  | 6.95E-11  |
| Unigene5244   | Potri.006G088000.2 | 44.5353  | 2.0861  | 4.4161 | Up | 4.81E-98  | 1.00E-96  |
| Unigene74147  | Potri.001G342900.1 | 16.0353  | 0.7511  | 4.4161 | Up | 1.18E-21  | 5.55E-21  |
| Unigene47552  | Potri.001G184200.1 | 24.6875  | 1.1564  | 4.4161 | Up | 4.40E-42  | 3.63E-41  |
| Unigene79798  | Potri.001G128200.2 | 7.0319   | 0.3294  | 4.416  | Up | 2.26E-11  | 6.95E-11  |
| Unigene81665  | Potri.011G164100.1 | 3.3511   | 0.157   | 4.4158 | Up | 3.60E-06  | 7.93E-06  |
| Unigene82008  | Potri.009G146000.2 | 3.3252   | 0.1558  | 4.4157 | Up | 3.60E-06  | 7.93E-06  |
| Unigene81017  | Potri.008G076200.1 | 3.4043   | 0.1595  | 4.4157 | Up | 3.60E-06  | 7.93E-06  |
| Unigene76828  | Potri.005G140000.1 | 3.7627   | 0.1763  | 4.4157 | Up | 3.60E-06  | 7.93E-06  |
| Unigene73296  | Potri.003G072300.1 | 4.0852   | 0.1914  | 4.4157 | Up | 3.60E-06  | 7.93E-06  |
| Unigene41236  | Potri.018G095200.1 | 135.3613 | 6.4005  | 4.4025 | Up | 0         | 0         |
| Unigene94460  | Potri.001G072100.1 | 10.1871  | 0.4817  | 4.4025 | Up | 7.96E-72  | 1.15E-70  |
| Unigene82318  | Potri.009G130100.2 | 13.0548  | 0.6182  | 4.4004 | Up | 2.18E-21  | 1.02E-20  |
| Unigene118773 | Potri.008G220000.1 | 104.3162 | 4.9509  | 4.3971 | Up | 2.17E-301 | 1.93E-299 |
| Unigene5362   | Potri.011G112400.1 | 37.4096  | 1.7781  | 4.395  | Up | 2.23E-76  | 3.47E-75  |
| Unigene70261  | Potri.010G249800.4 | 4.0132   | 0.1908  | 4.3946 | Up | 2.94E-16  | 1.13E-15  |
| Unigene99011  | Potri.001G285500.1 | 307.457  | 14.6424 | 4.3922 | Up | 0         | 0         |
| Unigene114530 | Potri.003G165700.1 | 295.6437 | 14.0871 | 4.3914 | Up | 0         | 0         |
| Unigene23112  | Potri.002G113000.2 | 47.5371  | 2.2658  | 4.391  | Up | 4.53E-265 | 3.38E-263 |
| Unigene41351  | Potri.005G067500.1 | 7.6149   | 0.363   | 4.3908 | Up | 3.33E-51  | 3.33E-50  |
| Unigene89148  | Potri.008G059800.4 | 48.3077  | 2.3029  | 4.3907 | Up | 5.41E-101 | 1.17E-99  |

|               |                    |           |         |        |    |           |           |
|---------------|--------------------|-----------|---------|--------|----|-----------|-----------|
| Unigene113751 | Potri.009G081500.1 | 1137.8523 | 54.3043 | 4.3891 | Up | 0         | 0         |
| Unigene105728 | Potri.002G117700.1 | 32.5714   | 1.5565  | 4.3872 | Up | 4.98E-56  | 5.50E-55  |
| Unigene81945  | Potri.005G220100.1 | 6.5057    | 0.3115  | 4.3844 | Up | 4.18E-11  | 1.27E-10  |
| Unigene86441  | Potri.004G144300.1 | 5.5763    | 0.267   | 4.3844 | Up | 4.18E-11  | 1.27E-10  |
| Unigene86313  | Potri.019G078300.1 | 5.5949    | 0.2679  | 4.3843 | Up | 4.18E-11  | 1.27E-10  |
| Unigene57977  | Potri.011G164000.1 | 5.1018    | 0.2443  | 4.3843 | Up | 4.03E-21  | 1.86E-20  |
| Unigene66870  | Potri.002G170900.1 | 4.0348    | 0.1932  | 4.3843 | Up | 4.18E-11  | 1.27E-10  |
| Unigene65834  | Potri.T041100.1    | 3.4115    | 0.1634  | 4.3839 | Up | 4.18E-11  | 1.27E-10  |
| Unigene50278  | Potri.001G137100.1 | 36.3553   | 1.744   | 4.3817 | Up | 5.54E-120 | 1.49E-118 |
| Unigene81482  | Potri.010G243100.7 | 22.9648   | 1.1031  | 4.3798 | Up | 6.45E-36  | 4.58E-35  |
| Unigene92261  | Potri.008G201400.5 | 30.5616   | 1.4691  | 4.3787 | Up | 3.26E-85  | 5.74E-84  |
| Unigene78358  | Potri.012G070700.1 | 17.7015   | 0.8514  | 4.3779 | Up | 5.69E-26  | 3.07E-25  |
| Unigene93298  | Potri.005G020500.2 | 11.9439   | 0.5751  | 4.3763 | Up | 9.49E-41  | 7.57E-40  |
| Unigene93338  | Potri.017G016200.1 | 4.4388    | 0.2141  | 4.3738 | Up | 5.44E-16  | 2.07E-15  |
| Unigene66340  | Potri.003G055800.5 | 4.6975    | 0.2266  | 4.3737 | Up | 5.44E-16  | 2.07E-15  |
| Unigene71536  | Potri.013G072000.1 | 12.3107   | 0.5939  | 4.3735 | Up | 5.44E-16  | 2.07E-15  |
| Unigene88874  | Potri.007G028500.1 | 7.2859    | 0.3515  | 4.3735 | Up | 5.44E-16  | 2.07E-15  |
| Unigene105859 | Potri.002G190400.1 | 404.1915  | 19.5446 | 4.3702 | Up | 0         | 0         |
| Unigene101317 | Potri.001G256500.3 | 14.6888   | 0.7112  | 4.3683 | Up | 7.46E-21  | 3.41E-20  |
| Unigene83900  | Potri.003G009300.2 | 15.1104   | 0.7333  | 4.365  | Up | 1.05E-25  | 5.62E-25  |
| Unigene92921  | Potri.018G094900.1 | 44.6585   | 2.1764  | 4.3589 | Up | 4.19E-137 | 1.34E-135 |
| Unigene94012  | Potri.008G144800.1 | 4.6036    | 0.2254  | 4.3522 | Up | 1.38E-20  | 6.25E-20  |
| Unigene94212  | Potri.014G036900.1 | 4.103     | 0.2009  | 4.3521 | Up | 1.38E-20  | 6.25E-20  |
| Unigene72026  | Potri.006G239400.1 | 4.0029    | 0.196   | 4.3521 | Up | 6.67E-06  | 1.44E-05  |
| Unigene103684 | Potri.011G046400.1 | 17.4065   | 0.8524  | 4.352  | Up | 4.06E-35  | 2.82E-34  |
| Unigene47109  | Potri.010G141200.1 | 28.962    | 1.4183  | 4.3519 | Up | 8.84E-45  | 7.72E-44  |
| Unigene69539  | Potri.008G094800.1 | 4.8845    | 0.2392  | 4.3519 | Up | 1.38E-20  | 6.25E-20  |
| Unigene64549  | Potri.001G112300.3 | 5.3113    | 0.2601  | 4.3519 | Up | 7.73E-11  | 2.31E-10  |
| Unigene99104  | Potri.010G147000.1 | 3.5834    | 0.1755  | 4.3518 | Up | 6.67E-06  | 1.44E-05  |
| Unigene77109  | Potri.004G139900.2 | 3.5834    | 0.1755  | 4.3518 | Up | 6.67E-06  | 1.44E-05  |
| Unigene82509  | Potri.011G162500.1 | 6.264     | 0.3068  | 4.3517 | Up | 7.73E-11  | 2.31E-10  |
| Unigene93090  | Potri.008G029300.4 | 4.6101    | 0.2258  | 4.3517 | Up | 1.01E-15  | 3.78E-15  |
| Unigene81682  | Potri.005G133800.1 | 3.2054    | 0.157   | 4.3517 | Up | 6.67E-06  | 1.44E-05  |
| Unigene66040  | Potri.015G087200.4 | 4.1444    | 0.203   | 4.3516 | Up | 7.73E-11  | 2.31E-10  |
| Unigene77731  | Potri.013G022700.2 | 3.5218    | 0.1725  | 4.3516 | Up | 6.67E-06  | 1.44E-05  |
| Unigene93062  | Potri.001G074600.1 | 3.0907    | 0.1514  | 4.3515 | Up | 7.73E-11  | 2.31E-10  |
| Unigene60227  | Potri.001G395100.1 | 6.1696    | 0.3037  | 4.3445 | Up | 1.63E-44  | 1.42E-43  |
| Unigene70148  | Potri.013G066500.1 | 4.4254    | 0.218   | 4.3434 | Up | 1.10E-39  | 8.57E-39  |

|               |                    |          |         |        |    |           |           |
|---------------|--------------------|----------|---------|--------|----|-----------|-----------|
| Unigene12706  | Potri.010G147100.1 | 283.6013 | 13.9854 | 4.3419 | Up | 0         | 0         |
| Unigene70285  | Potri.018G126300.1 | 10.5945  | 0.5236  | 4.3387 | Up | 9.80E-97  | 2.01E-95  |
| Unigene104018 | Potri.014G064900.1 | 122.7415 | 6.0745  | 4.3367 | Up | 0         | 0         |
| Unigene114718 | Potri.002G190400.1 | 607.9148 | 30.1024 | 4.3359 | Up | 0         | 0         |
| Unigene92381  | Potri.014G141400.2 | 12.0117  | 0.596   | 4.333  | Up | 1.38E-34  | 9.47E-34  |
| Unigene67951  | Potri.012G046600.1 | 5.6483   | 0.2804  | 4.3323 | Up | 8.27E-49  | 7.88E-48  |
| Unigene20048  | Potri.003G092800.1 | 67.3935  | 3.3488  | 4.3309 | Up | 1.44E-105 | 3.29E-104 |
| Unigene69379  | Potri.005G166100.1 | 6.2166   | 0.3091  | 4.33   | Up | 1.86E-15  | 6.90E-15  |
| Unigene90350  | Potri.018G020700.2 | 12.7604  | 0.6345  | 4.3299 | Up | 9.50E-30  | 5.72E-29  |
| Unigene92732  | Potri.016G079900.1 | 9.7173   | 0.4832  | 4.3299 | Up | 9.50E-30  | 5.72E-29  |
| Unigene68577  | Potri.009G038400.1 | 9.9189   | 0.4932  | 4.3299 | Up | 9.41E-101 | 2.03E-99  |
| Unigene58913  | Potri.017G076400.1 | 9.3429   | 0.4646  | 4.3298 | Up | 9.50E-30  | 5.72E-29  |
| Unigene68940  | Potri.013G004500.1 | 7.7583   | 0.3858  | 4.3298 | Up | 9.50E-30  | 5.72E-29  |
| Unigene48301  | Potri.004G163400.2 | 46.3284  | 2.3122  | 4.3246 | Up | 6.27E-138 | 2.02E-136 |
| Unigene22102  | Potri.001G118900.1 | 146.1873 | 7.3108  | 4.3216 | Up | 0         | 0         |
| Unigene42251  | Potri.014G044300.2 | 112.0255 | 5.6041  | 4.3212 | Up | 8.50E-194 | 4.25E-192 |
| Unigene17732  | Potri.012G134100.1 | 63.4406  | 3.1743  | 4.3209 | Up | 7.42E-222 | 4.36E-220 |
| Unigene69704  | Potri.002G189700.2 | 3.7127   | 0.186   | 4.3191 | Up | 1.43E-10  | 4.21E-10  |
| Unigene94230  | Potri.008G213000.1 | 3.9553   | 0.1982  | 4.3188 | Up | 4.69E-20  | 2.09E-19  |
| Unigene67878  | Potri.008G087000.1 | 5.0331   | 0.2522  | 4.3188 | Up | 1.75E-29  | 1.05E-28  |
| Unigene68939  | Potri.003G148200.1 | 4.5956   | 0.2303  | 4.3187 | Up | 1.43E-10  | 4.21E-10  |
| Unigene92157  | Potri.005G201800.1 | 3.5019   | 0.1755  | 4.3186 | Up | 1.43E-10  | 4.21E-10  |
| Unigene92894  | Potri.013G135400.1 | 3.1143   | 0.1561  | 4.3184 | Up | 1.43E-10  | 4.21E-10  |
| Unigene105070 | Potri.002G165000.1 | 438.8492 | 22.0792 | 4.313  | Up | 0         | 0         |
| Unigene93028  | Potri.006G227800.1 | 7.5588   | 0.3805  | 4.3122 | Up | 1.22E-24  | 6.31E-24  |
| Unigene70476  | Potri.011G031600.2 | 19.9553  | 1.0046  | 4.3121 | Up | 1.22E-24  | 6.31E-24  |
| Unigene88218  | Potri.002G057000.1 | 12.1309  | 0.6107  | 4.3121 | Up | 1.22E-24  | 6.31E-24  |
| Unigene68609  | Potri.008G145600.1 | 4.3714   | 0.2201  | 4.3119 | Up | 1.22E-24  | 6.31E-24  |
| Unigene61215  | Potri.012G077800.1 | 7.6022   | 0.3832  | 4.3102 | Up | 1.27E-38  | 9.67E-38  |
| Unigene94466  | Potri.006G250900.2 | 23.2889  | 1.174   | 4.3101 | Up | 3.85E-164 | 1.56E-162 |
| Unigene94446  | Potri.008G104400.1 | 10.0474  | 0.5068  | 4.3093 | Up | 1.67E-66  | 2.22E-65  |
| Unigene69650  | Potri.006G141500.1 | 5.6702   | 0.2864  | 4.3073 | Up | 3.43E-15  | 1.26E-14  |
| Unigene63677  | Potri.010G199400.1 | 6.4019   | 0.3238  | 4.3053 | Up | 9.55E-48  | 8.92E-47  |
| Unigene86141  | Potri.006G197000.2 | 21.2783  | 1.0788  | 4.3019 | Up | 2.35E-38  | 1.77E-37  |
| Unigene53551  | Potri.001G393800.1 | 48.5598  | 2.4642  | 4.3006 | Up | 2.03E-61  | 2.47E-60  |
| Unigene92969  | Potri.002G103900.2 | 13.6479  | 0.6928  | 4.3001 | Up | 6.41E-43  | 5.38E-42  |
| Unigene79299  | Potri.003G143600.1 | 62.2175  | 3.1681  | 4.2956 | Up | 9.83E-89  | 1.81E-87  |
| Unigene64582  | Potri.001G235300.1 | 9.3944   | 0.4791  | 4.2934 | Up | 4.33E-38  | 3.24E-37  |

|               |                    |          |        |        |    |           |           |
|---------------|--------------------|----------|--------|--------|----|-----------|-----------|
| Unigene94441  | Potri.001G329300.2 | 13.6098  | 0.6947 | 4.2921 | Up | 1.81E-88  | 3.32E-87  |
| Unigene115305 | Potri.002G249900.3 | 65.7616  | 3.3604 | 4.2905 | Up | 3.26E-111 | 7.98E-110 |
| Unigene94118  | Potri.012G134800.1 | 3.129    | 0.1605 | 4.2851 | Up | 6.32E-15  | 2.30E-14  |
| Unigene75563  | Potri.005G181800.1 | 3.5443   | 0.1818 | 4.2851 | Up | 1.24E-05  | 2.59E-05  |
| Unigene67413  | Potri.019G072300.1 | 6.2747   | 0.3219 | 4.2849 | Up | 1.10E-28  | 6.42E-28  |
| Unigene78516  | Potri.010G156900.1 | 6.61     | 0.3391 | 4.2849 | Up | 2.64E-10  | 7.66E-10  |
| Unigene60332  | Potri.007G138200.1 | 4.1775   | 0.2143 | 4.2849 | Up | 1.60E-19  | 6.98E-19  |
| Unigene88527  | Potri.005G171100.1 | 4.6764   | 0.2399 | 4.2849 | Up | 2.64E-10  | 7.66E-10  |
| Unigene68219  | Potri.003G051200.2 | 6.0486   | 0.3103 | 4.2849 | Up | 1.60E-19  | 6.98E-19  |
| Unigene36480  | Potri.018G099800.1 | 89.5189  | 4.5926 | 4.2848 | Up | 7.14E-129 | 2.10E-127 |
| Unigene92009  | Potri.008G141200.1 | 3.4813   | 0.1786 | 4.2848 | Up | 2.64E-10  | 7.66E-10  |
| Unigene76041  | Potri.006G096800.1 | 27.9747  | 1.4352 | 4.2848 | Up | 7.97E-38  | 5.94E-37  |
| Unigene65688  | Potri.002G069200.1 | 7.2527   | 0.3721 | 4.2848 | Up | 7.97E-38  | 5.94E-37  |
| Unigene65513  | Potri.010G116400.2 | 3.6602   | 0.1878 | 4.2847 | Up | 1.24E-05  | 2.59E-05  |
| Unigene66722  | Potri.009G046500.1 | 6.6948   | 0.3435 | 4.2847 | Up | 2.64E-10  | 7.66E-10  |
| Unigene89237  | Potri.007G025400.1 | 8.9264   | 0.458  | 4.2847 | Up | 1.60E-19  | 6.98E-19  |
| Unigene93920  | Potri.005G207600.1 | 4.6076   | 0.2364 | 4.2847 | Up | 1.60E-19  | 6.98E-19  |
| Unigene78260  | Potri.012G060600.1 | 3.319    | 0.1703 | 4.2846 | Up | 1.24E-05  | 2.59E-05  |
| Unigene89587  | Potri.008G212000.1 | 4.3637   | 0.2239 | 4.2846 | Up | 2.64E-10  | 7.66E-10  |
| Unigene26676  | Potri.008G149700.1 | 5.3285   | 0.2734 | 4.2846 | Up | 2.64E-10  | 7.66E-10  |
| Unigene73095  | Potri.001G007900.3 | 3.7478   | 0.1923 | 4.2846 | Up | 1.24E-05  | 2.59E-05  |
| Unigene56673  | Potri.018G100800.1 | 3.0165   | 0.1548 | 4.2844 | Up | 6.32E-15  | 2.30E-14  |
| Unigene15729  | Potri.004G033300.1 | 127.1679 | 6.5475 | 4.2796 | Up | 0         | 0         |
| Unigene84988  | Potri.002G231900.1 | 16.4171  | 0.849  | 4.2733 | Up | 2.02E-28  | 1.17E-27  |
| Unigene59671  | Potri.007G057300.1 | 4.1356   | 0.2142 | 4.2711 | Up | 7.64E-24  | 3.85E-23  |
| Unigene87416  | Potri.004G197700.1 | 31.971   | 1.6584 | 4.2689 | Up | 7.91E-60  | 9.38E-59  |
| Unigene81548  | Potri.007G014200.8 | 21.2095  | 1.1031 | 4.2651 | Up | 9.98E-33  | 6.54E-32  |
| Unigene67518  | Potri.006G233900.1 | 11.9656  | 0.6223 | 4.2651 | Up | 4.06E-64  | 5.19E-63  |
| Unigene24862  | Potri.006G022100.1 | 37.6894  | 1.9603 | 4.265  | Up | 4.06E-64  | 5.19E-63  |
| Unigene91773  | Potri.015G126400.1 | 14.0512  | 0.734  | 4.2588 | Up | 4.98E-37  | 3.64E-36  |
| Unigene89845  | Potri.011G129100.1 | 10.4969  | 0.549  | 4.257  | Up | 1.41E-23  | 7.03E-23  |
| Unigene77271  | Potri.006G132500.1 | 23.3528  | 1.223  | 4.2551 | Up | 1.84E-32  | 1.19E-31  |
| Unigene69998  | Potri.011G055100.1 | 5.7754   | 0.3025 | 4.2549 | Up | 1.84E-32  | 1.19E-31  |
| Unigene90746  | Potri.013G018400.2 | 3.9012   | 0.205  | 4.2502 | Up | 4.87E-10  | 1.39E-09  |
| Unigene84564  | Potri.006G081400.4 | 5.4617   | 0.287  | 4.2502 | Up | 4.87E-10  | 1.39E-09  |
| Unigene82700  | Potri.011G112300.1 | 11.6295  | 0.6112 | 4.25   | Up | 5.41E-19  | 2.32E-18  |
| Unigene77977  | Potri.012G038300.1 | 6.5354   | 0.3435 | 4.2499 | Up | 4.87E-10  | 1.39E-09  |
| Unigene108222 | Potri.003G143600.1 | 51.7848  | 2.731  | 4.245  | Up | 4.65E-63  | 5.83E-62  |



|               |                    |         |        |        |    |           |           |
|---------------|--------------------|---------|--------|--------|----|-----------|-----------|
| Unigene30068  | Potri.006G245400.1 | 27.9012 | 1.4766 | 4.24   | Up | 8.55E-63  | 1.07E-61  |
| Unigene98576  | Potri.005G214800.1 | 40.881  | 2.1645 | 4.2393 | Up | 3.65E-102 | 8.02E-101 |
| Unigene59881  | Potri.006G280200.3 | 6.9368  | 0.3675 | 4.2385 | Up | 2.15E-14  | 7.62E-14  |
| Unigene90659  | Potri.001G406100.1 | 5.849   | 0.3099 | 4.2383 | Up | 2.15E-14  | 7.62E-14  |
| Unigene15403  | Potri.012G064300.1 | 14.962  | 0.7946 | 4.2349 | Up | 6.22E-32  | 3.98E-31  |
| Unigene87256  | Potri.014G130100.6 | 9.6526  | 0.5135 | 4.2325 | Up | 9.97E-19  | 4.23E-18  |
| Unigene71730  | Potri.013G093800.1 | 14.8101 | 0.7879 | 4.2324 | Up | 9.97E-19  | 4.23E-18  |
| Unigene93509  | Potri.006G256400.1 | 5.1295  | 0.2729 | 4.2324 | Up | 9.97E-19  | 4.23E-18  |
| Unigene92430  | Potri.007G099400.1 | 6.3472  | 0.3377 | 4.2323 | Up | 9.97E-19  | 4.23E-18  |
| Unigene59862  | Potri.013G022700.2 | 8.8861  | 0.4728 | 4.2322 | Up | 9.97E-19  | 4.23E-18  |
| Unigene77957  | Potri.018G126400.2 | 51.4861 | 2.7477 | 4.2279 | Up | 7.64E-71  | 1.09E-69  |
| Unigene69938  | Potri.010G126700.3 | 10.3278 | 0.5517 | 4.2265 | Up | 2.32E-27  | 1.30E-26  |
| Unigene94318  | Potri.002G249200.1 | 10.2266 | 0.5486 | 4.2204 | Up | 3.73E-53  | 3.88E-52  |
| Unigene71975  | Potri.010G116600.3 | 3.639   | 0.196  | 4.2146 | Up | 2.28E-05  | 4.67E-05  |
| Unigene91021  | Potri.008G029300.4 | 3.7022  | 0.1994 | 4.2146 | Up | 8.97E-10  | 2.52E-09  |
| Unigene58886  | Potri.005G083000.1 | 7.7362  | 0.4167 | 4.2145 | Up | 2.10E-31  | 1.33E-30  |
| Unigene10163  | Potri.014G160400.8 | 35.3937 | 1.9066 | 4.2144 | Up | 3.50E-57  | 3.95E-56  |
| Unigene85278  | Potri.011G085000.1 | 7.7978  | 0.4201 | 4.2143 | Up | 3.95E-14  | 1.39E-13  |
| Unigene59255  | Potri.002G003100.3 | 8.3196  | 0.4482 | 4.2143 | Up | 3.95E-14  | 1.39E-13  |
| Unigene70302  | Potri.001G338000.1 | 4.4939  | 0.2421 | 4.2143 | Up | 1.05E-35  | 7.39E-35  |
| Unigene80129  | Potri.001G163000.1 | 3.0325  | 0.1634 | 4.214  | Up | 2.28E-05  | 4.67E-05  |
| Unigene3961   | Potri.003G068900.2 | 18.143  | 0.9828 | 4.2064 | Up | 9.65E-40  | 7.52E-39  |
| Unigene66602  | Potri.019G072000.1 | 7.0656  | 0.3836 | 4.2031 | Up | 1.18E-56  | 1.32E-55  |
| Unigene74505  | Potri.006G233800.1 | 17.0956 | 0.9302 | 4.1999 | Up | 1.61E-22  | 7.78E-22  |
| Unigene91119  | Potri.002G182500.7 | 18.1457 | 0.9874 | 4.1998 | Up | 8.95E-44  | 7.65E-43  |
| Unigene62655  | Potri.001G192500.1 | 6.0136  | 0.328  | 4.1965 | Up | 3.37E-18  | 1.40E-17  |
| Unigene43194  | Potri.005G187200.1 | 73.5414 | 4.0219 | 4.1926 | Up | 0         | 0         |
| Unigene90980  | Potri.015G093200.1 | 27.3468 | 1.5032 | 4.1853 | Up | 3.53E-64  | 4.52E-63  |
| Unigene91115  | Potri.011G116200.2 | 9.0033  | 0.4949 | 4.1852 | Up | 2.96E-22  | 1.41E-21  |
| Unigene63517  | Potri.010G109700.2 | 11.0936 | 0.6098 | 4.1852 | Up | 3.02E-43  | 2.55E-42  |
| Unigene66933  | Potri.012G082600.3 | 17.805  | 0.9801 | 4.1832 | Up | 1.30E-30  | 8.05E-30  |
| Unigene111162 | Potri.003G095500.5 | 82.3834 | 4.5427 | 4.1807 | Up | 9.82E-110 | 2.36E-108 |
| Unigene94142  | Potri.001G249300.1 | 3.8181  | 0.2109 | 4.1782 | Up | 6.20E-18  | 2.55E-17  |
| Unigene62488  | Potri.019G077500.3 | 3.0625  | 0.1692 | 4.1779 | Up | 1.65E-09  | 4.58E-09  |
| Unigene61485  | Potri.015G026200.1 | 3.8281  | 0.2115 | 4.1779 | Up | 1.65E-09  | 4.58E-09  |
| Unigene89965  | Potri.013G077900.1 | 3.9422  | 0.2178 | 4.1779 | Up | 1.65E-09  | 4.57E-09  |
| Unigene72455  | Potri.009G101900.1 | 14.0549 | 0.7765 | 4.1779 | Up | 6.20E-18  | 2.55E-17  |
| Unigene89936  | Potri.001G152800.1 | 3.9422  | 0.2178 | 4.1779 | Up | 1.65E-09  | 4.58E-09  |

|               |                     |           |         |        |    |           |           |
|---------------|---------------------|-----------|---------|--------|----|-----------|-----------|
| Unigene54336  | Potri.011G163900.1  | 3.8131    | 0.2107  | 4.1777 | Up | 6.20E-18  | 2.55E-17  |
| Unigene91501  | Potri.005G174400.1  | 3.4309    | 0.1896  | 4.1776 | Up | 1.65E-09  | 4.57E-09  |
| Unigene15297  | Potri.014G156300.1  | 283.3345  | 15.6914 | 4.1745 | Up | 0         | 0         |
| Unigene89970  | Potri.012G113400.2  | 17.6895   | 0.9801  | 4.1738 | Up | 1.10E-38  | 8.34E-38  |
| Unigene82645  | Potri.T059700.2     | 24.8191   | 1.3752  | 4.1737 | Up | 1.10E-38  | 8.34E-38  |
| Unigene94013  | Potri.012G087400.1  | 12.1367   | 0.6763  | 4.1656 | Up | 8.84E-51  | 8.77E-50  |
| Unigene67714  | Potri.003G202600.1  | 4.6725    | 0.2604  | 4.1654 | Up | 1.34E-13  | 4.58E-13  |
| Unigene115408 | Potri.018G095200.1  | 97.1853   | 5.4229  | 4.1636 | Up | 1.95E-161 | 7.69E-160 |
| Unigene94346  | Potri.005G016600.1  | 5.4852    | 0.3064  | 4.1621 | Up | 4.39E-30  | 2.67E-29  |
| Unigene67227  | Potri.004G199500.1  | 10.657    | 0.5953  | 4.162  | Up | 7.79E-59  | 9.07E-58  |
| Unigene63100  | Potri.002G227100.1  | 4.8108    | 0.2692  | 4.1595 | Up | 1.14E-17  | 4.64E-17  |
| Unigene81395  | Potri.013G098000.1  | 11.3073   | 0.6328  | 4.1594 | Up | 1.14E-17  | 4.64E-17  |
| Unigene89907  | Potri.013G023100.1  | 7.8045    | 0.4368  | 4.1593 | Up | 1.14E-17  | 4.64E-17  |
| Unigene68153  | Potri.005G021700.1  | 4.6474    | 0.2601  | 4.1593 | Up | 1.14E-17  | 4.64E-17  |
| Unigene116910 | Potri.009G015700.1  | 1727.6222 | 97.4223 | 4.1484 | Up | 0         | 0         |
| Unigene89211  | Potri.005G071000.2  | 20.3549   | 1.1481  | 4.1481 | Up | 6.27E-42  | 5.15E-41  |
| Unigene86853  | Potri.009G156100.1  | 27.8228   | 1.5708  | 4.1467 | Up | 5.45E-50  | 5.32E-49  |
| Unigene16187  | Potri.005G026700.1  | 253.2377  | 14.3135 | 4.145  | Up | 0         | 0         |
| Unigene117665 | Potri.009G015700.1  | 1143.9523 | 64.725  | 4.1436 | Up | 0         | 0         |
| Unigene4693   | Potri.019G102200.1  | 6.3655    | 0.3609  | 4.1406 | Up | 2.45E-13  | 8.31E-13  |
| Unigene64860  | Potri.007G052200.3  | 7.3567    | 0.4171  | 4.1406 | Up | 2.45E-13  | 8.31E-13  |
| Unigene84723  | Potri.019G034100.2  | 5.0441    | 0.286   | 4.1405 | Up | 3.04E-09  | 8.28E-09  |
| Unigene77689  | Potri.013G038100.2  | 3.0547    | 0.1732  | 4.1405 | Up | 4.21E-05  | 8.39E-05  |
| Unigene84679  | Potri.008G102400.1  | 5.0441    | 0.286   | 4.1405 | Up | 3.04E-09  | 8.28E-09  |
| Unigene70354  | Potri.009G073700.1  | 3.73      | 0.2115  | 4.1404 | Up | 2.09E-17  | 8.42E-17  |
| Unigene66170  | Potri.002G160500.8  | 4.7246    | 0.2679  | 4.1404 | Up | 1.48E-29  | 8.86E-29  |
| Unigene72849  | Potri.001G001400.2  | 3.4072    | 0.1932  | 4.1404 | Up | 4.21E-05  | 8.39E-05  |
| Unigene16255  | Potri.016G084800.1  | 12.7462   | 0.7228  | 4.1403 | Up | 1.83E-21  | 8.55E-21  |
| Unigene55199  | Potri.016G065200.2  | 4.2692    | 0.2421  | 4.1403 | Up | 3.04E-09  | 8.28E-09  |
| Unigene58213  | Potri.006G263300.1  | 10.1823   | 0.5774  | 4.1403 | Up | 1.83E-21  | 8.55E-21  |
| Unigene88115  | Potri.005G252600.11 | 4.3345    | 0.2458  | 4.1403 | Up | 3.04E-09  | 8.28E-09  |
| Unigene85650  | Potri.005G029300.2  | 4.8707    | 0.2762  | 4.1403 | Up | 3.04E-09  | 8.28E-09  |
| Unigene56578  | Potri.002G082400.1  | 5.7153    | 0.3241  | 4.1403 | Up | 3.04E-09  | 8.28E-09  |
| Unigene117288 | Potri.018G132600.1  | 494.1664  | 28.0388 | 4.1395 | Up | 0         | 0         |
| Unigene104274 | Potri.001G203400.1  | 103.9725  | 5.9022  | 4.1388 | Up | 0         | 0         |
| Unigene63598  | Potri.010G149000.1  | 4.6361    | 0.2649  | 4.1294 | Up | 2.71E-29  | 1.61E-28  |
| Unigene94248  | Potri.006G138800.1  | 13.6584   | 0.7822  | 4.1261 | Up | 4.81E-65  | 6.25E-64  |
| Unigene79474  | Potri.001G418600.2  | 11.5598   | 0.6642  | 4.1214 | Up | 3.83E-17  | 1.53E-16  |

|               |                    |          |         |        |    |           |           |
|---------------|--------------------|----------|---------|--------|----|-----------|-----------|
| Unigene61889  | Potri.005G254500.1 | 4.7095   | 0.2706  | 4.1213 | Up | 3.83E-17  | 1.53E-16  |
| Unigene69086  | Potri.001G172400.1 | 7.9024   | 0.4541  | 4.1212 | Up | 3.83E-17  | 1.53E-16  |
| Unigene34026  | Potri.001G235800.1 | 55.2107  | 3.183   | 4.1165 | Up | 1.75E-190 | 8.60E-189 |
| Unigene77857  | Potri.004G093600.2 | 8.9647   | 0.5174  | 4.1149 | Up | 4.50E-13  | 1.51E-12  |
| Unigene67718  | Potri.008G035800.2 | 4.1609   | 0.2402  | 4.1146 | Up | 4.50E-13  | 1.51E-12  |
| Unigene94189  | Potri.014G078700.1 | 22.9281  | 1.3242  | 4.1139 | Up | 1.11E-103 | 2.47E-102 |
| Unigene65092  | Potri.018G004500.1 | 8.6838   | 0.5023  | 4.1117 | Up | 8.30E-33  | 5.45E-32  |
| Unigene47802  | Potri.019G037300.3 | 98.4784  | 5.702   | 4.1103 | Up | 0         | 0         |
| Unigene68086  | Potri.003G095300.6 | 11.6797  | 0.6765  | 4.1098 | Up | 6.15E-21  | 2.82E-20  |
| Unigene10370  | Potri.005G235200.4 | 207.9216 | 12.0733 | 4.1061 | Up | 0         | 0         |
| Unigene70367  | Potri.006G034400.1 | 3.3096   | 0.1927  | 4.1022 | Up | 7.02E-17  | 2.77E-16  |
| Unigene90945  | Potri.006G225800.1 | 3.4502   | 0.2009  | 4.1021 | Up | 5.58E-09  | 1.50E-08  |
| Unigene89752  | Potri.T066800.1    | 3.8019   | 0.2214  | 4.102  | Up | 5.58E-09  | 1.50E-08  |
| Unigene64712  | Potri.008G078600.1 | 4.8424   | 0.282   | 4.102  | Up | 7.02E-17  | 2.77E-16  |
| Unigene96065  | Potri.T175800.1    | 42.0025  | 2.4461  | 4.1019 | Up | 6.08E-56  | 6.70E-55  |
| Unigene71289  | Potri.004G229500.6 | 6.8321   | 0.3979  | 4.1019 | Up | 5.58E-09  | 1.50E-08  |
| Unigene63834  | Potri.002G063700.1 | 5.1114   | 0.2977  | 4.1018 | Up | 7.02E-17  | 2.77E-16  |
| Unigene34218  | Potri.010G157300.2 | 31.3565  | 1.8294  | 4.0993 | Up | 6.39E-118 | 1.68E-116 |
| Unigene70389  | Potri.004G054600.1 | 8.133    | 0.4748  | 4.0984 | Up | 4.04E-44  | 3.47E-43  |
| Unigene47608  | Potri.016G019900.1 | 25.419   | 1.4883  | 4.0942 | Up | 4.34E-40  | 3.41E-39  |
| Unigene118412 | Potri.009G015700.1 | 951.8198 | 55.874  | 4.0904 | Up | 0         | 0         |
| Unigene52750  | Potri.001G234600.1 | 41.6161  | 2.4445  | 4.0895 | Up | 0         | 0         |
| Unigene91408  | Potri.002G194300.1 | 4.8845   | 0.287   | 4.0891 | Up | 8.26E-13  | 2.73E-12  |
| Unigene70077  | Potri.002G110700.3 | 3.7885   | 0.2226  | 4.0891 | Up | 1.84E-24  | 9.48E-24  |
| Unigene88294  | Potri.004G193800.1 | 6.2166   | 0.3653  | 4.089  | Up | 8.26E-13  | 2.73E-12  |
| Unigene85845  | Potri.005G021400.1 | 6.9778   | 0.4101  | 4.0887 | Up | 8.26E-13  | 2.73E-12  |
| Unigene91915  | Potri.007G080900.5 | 6.1188   | 0.3612  | 4.0824 | Up | 1.29E-16  | 5.02E-16  |
| Unigene93364  | Potri.006G138700.1 | 4.8022   | 0.2835  | 4.0823 | Up | 1.29E-16  | 5.02E-16  |
| Unigene93703  | Potri.013G156400.1 | 4.3496   | 0.2568  | 4.0822 | Up | 1.29E-16  | 5.02E-16  |
| Unigene93137  | Potri.005G092800.1 | 5.0611   | 0.2988  | 4.0822 | Up | 1.29E-16  | 5.02E-16  |
| Unigene5093   | Potri.014G044300.2 | 23.7361  | 1.4051  | 4.0783 | Up | 1.01E-77  | 1.59E-76  |
| Unigene53220  | Potri.005G083000.1 | 15.9437  | 0.9455  | 4.0758 | Up | 3.37E-24  | 1.72E-23  |
| Unigene38064  | Potri.019G083900.1 | 37.7615  | 2.2394  | 4.0757 | Up | 6.09E-70  | 8.55E-69  |
| Unigene37356  | Potri.001G006200.1 | 8.207    | 0.4878  | 4.0725 | Up | 9.32E-32  | 5.94E-31  |
| Unigene94156  | Potri.016G139200.1 | 11.3689  | 0.6776  | 4.0685 | Up | 1.32E-50  | 1.31E-49  |
| Unigene71169  | Potri.015G048700.3 | 3.3237   | 0.1989  | 4.0627 | Up | 7.75E-05  | 1.50E-04  |
| Unigene94100  | Potri.010G230500.6 | 5.429    | 0.3249  | 4.0626 | Up | 6.16E-24  | 3.12E-23  |
| Unigene71866  | Potri.005G159100.1 | 3.2751   | 0.196   | 4.0626 | Up | 7.75E-05  | 1.50E-04  |

|               |                    |          |        |        |    |           |           |
|---------------|--------------------|----------|--------|--------|----|-----------|-----------|
| Unigene86970  | Potri.003G159200.2 | 6.5184   | 0.3901 | 4.0626 | Up | 1.51E-12  | 4.94E-12  |
| Unigene93567  | Potri.001G076000.1 | 3.357    | 0.2009 | 4.0626 | Up | 1.51E-12  | 4.94E-12  |
| Unigene69750  | Potri.016G126300.1 | 3.853    | 0.2306 | 4.0625 | Up | 2.36E-16  | 9.10E-16  |
| Unigene91395  | Potri.016G019800.3 | 3.2047   | 0.1918 | 4.0625 | Up | 1.02E-08  | 2.71E-08  |
| Unigene62260  | Potri.009G027500.1 | 11.9399  | 0.7146 | 4.0625 | Up | 2.42E-50  | 2.38E-49  |
| Unigene60669  | Potri.001G337400.7 | 5.0292   | 0.301  | 4.0625 | Up | 1.02E-08  | 2.71E-08  |
| Unigene65912  | Potri.001G056000.3 | 5.9415   | 0.3556 | 4.0625 | Up | 1.51E-12  | 4.94E-12  |
| Unigene89782  | Potri.018G122800.2 | 5.5334   | 0.3312 | 4.0624 | Up | 1.51E-12  | 4.94E-12  |
| Unigene92851  | Potri.010G129200.1 | 6.5694   | 0.3932 | 4.0624 | Up | 3.77E-20  | 1.69E-19  |
| Unigene65199  | Potri.008G226200.2 | 3.6489   | 0.2184 | 4.0624 | Up | 1.02E-08  | 2.71E-08  |
| Unigene106071 | Potri.006G069500.1 | 120.4608 | 7.21   | 4.0624 | Up | 6.97E-257 | 5.00E-255 |
| Unigene76051  | Potri.001G072700.2 | 8.9919   | 0.5382 | 4.0624 | Up | 1.51E-12  | 4.94E-12  |
| Unigene88165  | Potri.006G280200.1 | 8.1877   | 0.4901 | 4.0623 | Up | 2.36E-16  | 9.10E-16  |
| Unigene86668  | Potri.006G062900.5 | 6.6256   | 0.3966 | 4.0623 | Up | 1.51E-12  | 4.94E-12  |
| Unigene62572  | Potri.001G392300.1 | 4.0445   | 0.2421 | 4.0623 | Up | 1.02E-08  | 2.71E-08  |
| Unigene71352  | Potri.016G139600.2 | 3.3073   | 0.198  | 4.0621 | Up | 7.75E-05  | 1.50E-04  |
| Unigene75339  | Potri.013G038100.2 | 3.0518   | 0.1827 | 4.0621 | Up | 7.75E-05  | 1.50E-04  |
| Unigene56274  | Potri.014G161200.1 | 3.1669   | 0.1896 | 4.062  | Up | 7.75E-05  | 1.50E-04  |
| Unigene73597  | Potri.007G138200.1 | 3.1669   | 0.1896 | 4.062  | Up | 7.75E-05  | 1.50E-04  |
| Unigene85359  | Potri.001G234600.1 | 53.4886  | 3.2092 | 4.0589 | Up | 1.09E-87  | 1.98E-86  |
| Unigene52261  | Potri.004G082200.3 | 46.1443  | 2.777  | 4.0546 | Up | 8.78E-192 | 4.35E-190 |
| Unigene51485  | Potri.010G243100.7 | 49.0283  | 2.9598 | 4.05   | Up | 3.53E-98  | 7.39E-97  |
| Unigene66873  | Potri.008G150500.2 | 6.834    | 0.4129 | 4.0489 | Up | 1.13E-23  | 5.66E-23  |
| Unigene66427  | Potri.001G442600.3 | 5.5049   | 0.3326 | 4.0489 | Up | 1.13E-23  | 5.66E-23  |
| Unigene37001  | Potri.014G155600.1 | 11.2994  | 0.6832 | 4.0478 | Up | 2.76E-42  | 2.28E-41  |
| Unigene26138  | Potri.010G168200.2 | 7.4577   | 0.451  | 4.0475 | Up | 1.84E-142 | 6.14E-141 |
| Unigene68938  | Potri.005G166000.1 | 8.7359   | 0.5288 | 4.0462 | Up | 6.90E-20  | 3.06E-19  |
| Unigene94444  | Potri.002G196200.2 | 7.7834   | 0.4719 | 4.0438 | Up | 1.48E-49  | 1.43E-48  |
| Unigene15909  | Potri.016G031000.1 | 21.018   | 1.2757 | 4.0423 | Up | 5.69E-31  | 3.55E-30  |
| Unigene110902 | Potri.007G138100.2 | 34.9991  | 2.1243 | 4.0423 | Up | 8.62E-46  | 7.70E-45  |
| Unigene67251  | Potri.010G168400.1 | 5.9916   | 0.3637 | 4.0421 | Up | 4.31E-16  | 1.65E-15  |
| Unigene86845  | Potri.006G257200.2 | 15.0656  | 0.9163 | 4.0393 | Up | 3.41E-27  | 1.91E-26  |
| Unigene61975  | Potri.001G327900.1 | 3.4866   | 0.2126 | 4.0356 | Up | 2.77E-12  | 8.91E-12  |
| Unigene3351   | Potri.015G025200.2 | 68.5982  | 4.1833 | 4.0355 | Up | 1.22E-122 | 3.37E-121 |
| Unigene76181  | Potri.009G034700.1 | 8.7861   | 0.5358 | 4.0355 | Up | 2.77E-12  | 8.91E-12  |
| Unigene89788  | Potri.010G073600.1 | 5.4161   | 0.3303 | 4.0354 | Up | 2.77E-12  | 8.91E-12  |
| Unigene12054  | Potri.008G192600.1 | 82.3659  | 5.0274 | 4.0342 | Up | 0         | 0         |
| Unigene26364  | Potri.017G017000.1 | 3.7005   | 0.2265 | 4.0301 | Up | 1.26E-19  | 5.54E-19  |

|               |                    |          |         |        |    |           |           |
|---------------|--------------------|----------|---------|--------|----|-----------|-----------|
| Unigene92595  | Potri.004G201900.1 | 6.7124   | 0.4109  | 4.03   | Up | 1.26E-19  | 5.54E-19  |
| Unigene93570  | Potri.001G112500.2 | 21.846   | 1.3373  | 4.03   | Up | 1.39E-74  | 2.10E-73  |
| Unigene4097   | Potri.009G148000.1 | 37.2995  | 2.2854  | 4.0286 | Up | 2.87E-45  | 2.54E-44  |
| Unigene107309 | Potri.001G285500.1 | 741.7015 | 45.6102 | 4.0234 | Up | 0         | 0         |
| Unigene77373  | Potri.018G115200.1 | 5.6514   | 0.3479  | 4.0219 | Up | 1.87E-08  | 4.89E-08  |
| Unigene93664  | Potri.015G091800.3 | 4.2317   | 0.2605  | 4.0219 | Up | 7.88E-16  | 2.98E-15  |
| Unigene49512  | Potri.014G052500.3 | 14.5593  | 0.8963  | 4.0218 | Up | 8.40E-67  | 1.12E-65  |
| Unigene68055  | Potri.002G212000.1 | 5.3946   | 0.3321  | 4.0218 | Up | 7.88E-16  | 2.98E-15  |
| Unigene5223   | Potri.017G114500.1 | 12.5931  | 0.7753  | 4.0217 | Up | 3.76E-23  | 1.86E-22  |
| Unigene88787  | Potri.003G126100.2 | 3.8397   | 0.2364  | 4.0217 | Up | 1.87E-08  | 4.89E-08  |
| Unigene79112  | Potri.003G108800.9 | 5.4395   | 0.3349  | 4.0217 | Up | 1.87E-08  | 4.89E-08  |
| Unigene57929  | Potri.015G129900.1 | 3.4445   | 0.2121  | 4.0215 | Up | 1.87E-08  | 4.89E-08  |
| Unigene25052  | Potri.006G128600.5 | 20.1238  | 1.2428  | 4.0172 | Up | 5.84E-34  | 3.94E-33  |
| Unigene62089  | Potri.009G131900.1 | 7.1437   | 0.4416  | 4.0159 | Up | 1.14E-26  | 6.26E-26  |
| Unigene19024  | Potri.008G175800.1 | 15.7051  | 0.9718  | 4.0144 | Up | 8.84E-63  | 1.10E-61  |
| Unigene93251  | Potri.016G120300.1 | 5.8894   | 0.3647  | 4.0133 | Up | 2.31E-19  | 1.00E-18  |
| Unigene17727  | Potri.003G103900.1 | 82.7021  | 5.1271  | 4.0117 | Up | 2.25E-267 | 1.70E-265 |
| Unigene93913  | Potri.005G242700.7 | 25.8016  | 1.6003  | 4.011  | Up | 1.54E-98  | 3.25E-97  |
| Unigene82383  | Potri.T165400.1    | 7.4313   | 0.4619  | 4.008  | Up | 5.06E-12  | 1.61E-11  |
| Unigene68312  | Potri.009G141300.2 | 3.3557   | 0.2086  | 4.0078 | Up | 5.06E-12  | 1.61E-11  |
| Unigene117912 | Potri.013G018600.1 | 382.5107 | 23.7831 | 4.0075 | Up | 0         | 0         |
| Unigene60590  | Potri.006G034600.1 | 8.1574   | 0.5095  | 4.001  | Up | 6.33E-30  | 3.83E-29  |
| Unigene62382  | Potri.004G204400.1 | 7.919    | 0.4946  | 4.001  | Up | 1.44E-15  | 5.37E-15  |
| Unigene8886   | Potri.001G122300.1 | 17.9663  | 1.1221  | 4.001  | Up | 1.70E-58  | 1.97E-57  |
| Unigene23957  | Potri.018G115100.3 | 86.7311  | 5.4229  | 3.9994 | Up | 0         | 0         |
| Unigene119185 | Potri.002G049000.1 | 676.4754 | 42.2967 | 3.9994 | Up | 0         | 0         |
| Unigene47878  | Potri.012G001500.1 | 391.5889 | 24.5239 | 3.9971 | Up | 0         | 0         |
| Unigene86749  | Potri.015G086500.4 | 10.4829  | 0.6566  | 3.9969 | Up | 4.21E-19  | 1.81E-18  |
| Unigene66678  | Potri.001G297300.1 | 8.7405   | 0.5475  | 3.9968 | Up | 4.21E-19  | 1.81E-18  |
| Unigene95267  | Potri.012G099200.1 | 228.9512 | 14.3682 | 3.9941 | Up | 0         | 0         |
| Unigene117526 | Potri.012G014100.1 | 78.2579  | 4.9273  | 3.9894 | Up | 4.00E-160 | 1.56E-158 |
| Unigene42612  | Potri.014G138300.1 | 46.5926  | 2.9487  | 3.9819 | Up | 1.75E-302 | 1.57E-300 |
| Unigene94137  | Potri.006G262700.2 | 54.3522  | 3.4414  | 3.9813 | Up | 6.44E-229 | 3.93E-227 |
| Unigene59434  | Potri.018G028300.1 | 3.1864   | 0.2019  | 3.9802 | Up | 9.25E-12  | 2.90E-11  |
| Unigene71067  | Potri.014G043500.4 | 3.1391   | 0.1989  | 3.9802 | Up | 1.42E-04  | 2.69E-04  |
| Unigene66673  | Potri.010G138800.4 | 3.1626   | 0.2004  | 3.9802 | Up | 3.43E-08  | 8.78E-08  |
| Unigene72413  | Potri.009G146100.2 | 3.0632   | 0.1941  | 3.9802 | Up | 1.42E-04  | 2.69E-04  |
| Unigene66185  | Potri.008G103800.2 | 5.4663   | 0.3464  | 3.9801 | Up | 3.43E-08  | 8.78E-08  |

|               |                    |          |         |        |    |           |           |
|---------------|--------------------|----------|---------|--------|----|-----------|-----------|
| Unigene58273  | Potri.004G193700.1 | 6.6546   | 0.4217  | 3.9801 | Up | 1.89E-50  | 1.87E-49  |
| Unigene87999  | Potri.003G064200.1 | 3.8901   | 0.2465  | 3.9801 | Up | 3.43E-08  | 8.78E-08  |
| Unigene40998  | Potri.001G248100.1 | 8.2753   | 0.5244  | 3.9801 | Up | 1.88E-57  | 2.13E-56  |
| Unigene81681  | Potri.012G136100.1 | 14.8615  | 0.9418  | 3.98   | Up | 2.29E-22  | 1.10E-21  |
| Unigene74401  | Potri.010G128400.1 | 5.8985   | 0.3738  | 3.98   | Up | 3.43E-08  | 8.78E-08  |
| Unigene65439  | Potri.010G073300.2 | 7.2745   | 0.461   | 3.98   | Up | 2.29E-22  | 1.10E-21  |
| Unigene113524 | Potri.010G062900.1 | 71.8308  | 4.5522  | 3.98   | Up | 6.37E-103 | 1.41E-101 |
| Unigene85441  | Potri.005G138000.2 | 4.3882   | 0.2781  | 3.98   | Up | 3.43E-08  | 8.78E-08  |
| Unigene89952  | Potri.002G131000.1 | 5.1552   | 0.3267  | 3.98   | Up | 9.25E-12  | 2.90E-11  |
| Unigene86829  | Potri.018G005800.1 | 6.1963   | 0.3927  | 3.9799 | Up | 9.25E-12  | 2.90E-11  |
| Unigene67289  | Potri.011G036400.1 | 4.732    | 0.2999  | 3.9799 | Up | 3.43E-08  | 8.78E-08  |
| Unigene69542  | Potri.010G099300.1 | 3.484    | 0.2208  | 3.9799 | Up | 3.43E-08  | 8.78E-08  |
| Unigene67328  | Potri.005G079800.1 | 5.7908   | 0.367   | 3.9799 | Up | 2.63E-15  | 9.70E-15  |
| Unigene70195  | Potri.004G191200.1 | 8.041    | 0.5096  | 3.9799 | Up | 6.91E-26  | 3.71E-25  |
| Unigene85364  | Potri.001G264400.1 | 6.6051   | 0.4186  | 3.9799 | Up | 9.25E-12  | 2.90E-11  |
| Unigene68414  | Potri.008G159000.2 | 6.3031   | 0.3995  | 3.9798 | Up | 7.68E-19  | 3.27E-18  |
| Unigene69703  | Potri.002G123400.1 | 5.5299   | 0.3505  | 3.9798 | Up | 2.29E-22  | 1.10E-21  |
| Unigene73093  | Potri.008G194800.1 | 3.0339   | 0.1923  | 3.9797 | Up | 1.42E-04  | 2.69E-04  |
| Unigene92349  | Potri.002G038500.2 | 17.4594  | 1.1115  | 3.9734 | Up | 1.10E-46  | 1.00E-45  |
| Unigene31028  | Potri.013G049900.1 | 52.4976  | 3.344   | 3.9726 | Up | 6.45E-203 | 3.41E-201 |
| Unigene90685  | Potri.005G259900.1 | 16.1631  | 1.0304  | 3.9714 | Up | 3.64E-36  | 2.60E-35  |
| Unigene108842 | Potri.014G065500.1 | 254.525  | 16.2654 | 3.9679 | Up | 2.39E-295 | 2.07E-293 |
| Unigene91536  | Potri.010G173900.3 | 8.8641   | 0.5673  | 3.9658 | Up | 4.17E-22  | 1.99E-21  |
| Unigene79380  | Potri.008G147000.1 | 25.8939  | 1.6605  | 3.9629 | Up | 6.63E-36  | 4.71E-35  |
| Unigene111632 | Potri.006G069500.2 | 151.8965 | 9.747   | 3.962  | Up | 1.33E-197 | 6.79E-196 |
| Unigene55952  | Potri.007G134600.2 | 6.0657   | 0.3901  | 3.9588 | Up | 4.79E-15  | 1.75E-14  |
| Unigene83381  | Potri.008G147000.1 | 27.8707  | 1.7926  | 3.9586 | Up | 1.17E-42  | 9.74E-42  |
| Unigene68236  | Potri.006G127000.2 | 7.0996   | 0.4567  | 3.9584 | Up | 4.79E-15  | 1.75E-14  |
| Unigene10574  | Potri.002G083000.1 | 42.7433  | 2.7514  | 3.9575 | Up | 9.07E-132 | 2.75E-130 |
| Unigene36639  | Potri.016G101700.2 | 94.111   | 6.062   | 3.9565 | Up | 9.24E-214 | 5.18E-212 |
| Unigene71526  | Potri.014G076000.1 | 21.4978  | 1.3857  | 3.9555 | Up | 2.29E-25  | 1.21E-24  |
| Unigene45143  | Potri.016G084500.2 | 29.8396  | 1.9267  | 3.953  | Up | 5.00E-121 | 1.36E-119 |
| Unigene36929  | Potri.001G054400.1 | 98.8264  | 6.3846  | 3.9522 | Up | 1.56E-117 | 4.09E-116 |
| Unigene68804  | Potri.014G155000.1 | 5.1949   | 0.3358  | 3.9514 | Up | 3.91E-32  | 2.52E-31  |
| Unigene65784  | Potri.014G124300.2 | 5.7208   | 0.3698  | 3.9514 | Up | 1.69E-11  | 5.22E-11  |
| Unigene52625  | Potri.006G088000.2 | 357.5647 | 23.1203 | 3.951  | Up | 0         | 0         |
| Unigene4609   | Potri.008G174100.2 | 109.8168 | 7.1025  | 3.9506 | Up | 2.71E-260 | 1.98E-258 |
| Unigene23760  | Potri.005G216400.1 | 13.0943  | 0.8492  | 3.9467 | Up | 8.63E-107 | 2.00E-105 |

|               |                     |          |         |        |    |           |           |
|---------------|---------------------|----------|---------|--------|----|-----------|-----------|
| Unigene90113  | Potri.015G086400.1  | 8.2777   | 0.5372  | 3.9457 | Up | 2.55E-18  | 1.07E-17  |
| Unigene13630  | Potri.018G099800.1  | 200.1816 | 12.9988 | 3.9449 | Up | 0         | 0         |
| Unigene66025  | Potri.001G133500.2  | 3.5729   | 0.2323  | 3.943  | Up | 4.18E-25  | 2.19E-24  |
| Unigene102670 | Potri.004G078100.1  | 349.5376 | 22.7612 | 3.9408 | Up | 0         | 0         |
| Unigene23486  | Potri.008G173500.1  | 44.0114  | 2.8704  | 3.9386 | Up | 9.12E-177 | 4.05E-175 |
| Unigene61216  | Potri.011G077700.4  | 4.2444   | 0.2771  | 3.9371 | Up | 6.27E-08  | 1.58E-07  |
| Unigene89489  | Potri.005G042400.1  | 3.4479   | 0.2251  | 3.9371 | Up | 6.27E-08  | 1.58E-07  |
| Unigene91349  | Potri.006G105600.1  | 11.8071  | 0.7709  | 3.937  | Up | 2.32E-28  | 1.34E-27  |
| Unigene60364  | Potri.016G031000.1  | 3.2911   | 0.2149  | 3.9368 | Up | 6.27E-08  | 1.58E-07  |
| Unigene89007  | Potri.014G124000.1  | 3.5575   | 0.2323  | 3.9368 | Up | 6.27E-08  | 1.58E-07  |
| Unigene78935  | Potri.014G094200.3  | 5.1501   | 0.3363  | 3.9368 | Up | 6.27E-08  | 1.58E-07  |
| Unigene88054  | Potri.008G133400.11 | 7.5514   | 0.4931  | 3.9368 | Up | 8.74E-15  | 3.15E-14  |
| Unigene80689  | Potri.003G006300.1  | 4.9235   | 0.3215  | 3.9368 | Up | 6.27E-08  | 1.58E-07  |
| Unigene68996  | Potri.002G162000.3  | 5.6463   | 0.3687  | 3.9368 | Up | 8.74E-15  | 3.15E-14  |
| Unigene81504  | Potri.002G081400.2  | 9.654    | 0.6304  | 3.9368 | Up | 8.74E-15  | 3.15E-14  |
| Unigene87060  | Potri.001G423800.1  | 3.9706   | 0.2593  | 3.9367 | Up | 6.27E-08  | 1.58E-07  |
| Unigene15844  | Potri.002G190400.1  | 475.8203 | 31.0904 | 3.9359 | Up | 0         | 0         |
| Unigene81614  | Potri.001G268200.2  | 11.9944  | 0.7879  | 3.9282 | Up | 4.65E-18  | 1.93E-17  |
| Unigene90629  | Potri.017G123600.1  | 12.561   | 0.8264  | 3.926  | Up | 4.22E-28  | 2.42E-27  |
| Unigene74039  | Potri.006G214800.1  | 22.8329  | 1.5023  | 3.9259 | Up | 4.22E-28  | 2.42E-27  |
| Unigene91127  | Potri.005G083100.4  | 4.4906   | 0.2962  | 3.9223 | Up | 3.08E-11  | 9.41E-11  |
| Unigene71035  | Potri.007G065500.4  | 9.0929   | 0.5998  | 3.9222 | Up | 3.08E-11  | 9.41E-11  |
| Unigene94187  | Potri.010G126100.1  | 3.0728   | 0.2037  | 3.915  | Up | 1.59E-14  | 5.68E-14  |
| Unigene67116  | Potri.008G166700.1  | 5.0092   | 0.3321  | 3.9149 | Up | 1.59E-14  | 5.68E-14  |
| Unigene62209  | Potri.012G129200.2  | 4.1658   | 0.2762  | 3.9148 | Up | 1.59E-14  | 5.68E-14  |
| Unigene92793  | Potri.018G063700.4  | 4.7914   | 0.3177  | 3.9147 | Up | 1.59E-14  | 5.68E-14  |
| Unigene81814  | Potri.004G191200.1  | 9.4337   | 0.6255  | 3.9147 | Up | 1.59E-14  | 5.68E-14  |
| Unigene104977 | Potri.001G007000.1  | 232.9933 | 15.463  | 3.9134 | Up | 0         | 0         |
| Unigene37942  | Potri.009G009300.1  | 758.4242 | 50.4285 | 3.9107 | Up | 0         | 0         |
| Unigene93658  | Potri.016G045600.1  | 4.9046   | 0.3262  | 3.9103 | Up | 8.46E-18  | 3.47E-17  |
| Unigene20351  | Potri.002G132100.1  | 100.6652 | 6.6975  | 3.9098 | Up | 8.93E-189 | 4.34E-187 |
| Unigene56948  | Potri.014G043700.1  | 5.1909   | 0.3459  | 3.9076 | Up | 4.58E-21  | 2.11E-20  |
| Unigene84530  | Potri.001G137100.1  | 12.9679  | 0.8642  | 3.9074 | Up | 4.58E-21  | 2.11E-20  |
| Unigene5466   | Potri.006G113300.1  | 15.7921  | 1.0532  | 3.9064 | Up | 4.38E-44  | 3.76E-43  |
| Unigene43633  | Potri.011G166400.2  | 42.8777  | 2.86    | 3.9061 | Up | 3.99E-260 | 2.92E-258 |
| Unigene87277  | Potri.014G190900.1  | 15.3727  | 1.0271  | 3.9037 | Up | 1.39E-27  | 7.90E-27  |
| Unigene109245 | Potri.016G071600.1  | 852.286  | 56.9762 | 3.9029 | Up | 0         | 0         |
| Unigene88598  | Potri.014G016600.1  | 16.0965  | 1.0764  | 3.9025 | Up | 7.79E-31  | 4.84E-30  |

|               |                    |          |         |        |    |           |           |
|---------------|--------------------|----------|---------|--------|----|-----------|-----------|
| Unigene15870  | Potri.009G049700.1 | 110.9583 | 7.4292  | 3.9007 | Up | 6.12E-145 | 2.09E-143 |
| Unigene66974  | Potri.006G127200.5 | 8.9356   | 0.5992  | 3.8985 | Up | 2.59E-50  | 2.55E-49  |
| Unigene46173  | Potri.002G041000.1 | 15.3622  | 1.0304  | 3.8981 | Up | 1.48E-53  | 1.56E-52  |
| Unigene87476  | Potri.017G086700.1 | 3.7772   | 0.2543  | 3.8927 | Up | 1.14E-07  | 2.82E-07  |
| Unigene67003  | Potri.007G029400.3 | 4.9119   | 0.3307  | 3.8927 | Up | 1.14E-07  | 2.82E-07  |
| Unigene70046  | Potri.016G105100.2 | 4.6263   | 0.3115  | 3.8926 | Up | 2.90E-14  | 1.02E-13  |
| Unigene86189  | Potri.013G155000.1 | 14.0186  | 0.9439  | 3.8926 | Up | 4.57E-24  | 2.32E-23  |
| Unigene83959  | Potri.010G070800.5 | 4.3562   | 0.2933  | 3.8926 | Up | 1.14E-07  | 2.82E-07  |
| Unigene93749  | Potri.005G083200.1 | 4.6844   | 0.3154  | 3.8926 | Up | 1.54E-17  | 6.24E-17  |
| Unigene68477  | Potri.001G295100.1 | 3.1829   | 0.2143  | 3.8926 | Up | 2.90E-14  | 1.02E-13  |
| Unigene55054  | Potri.016G105700.2 | 3.334    | 0.2245  | 3.8925 | Up | 1.14E-07  | 2.82E-07  |
| Unigene61722  | Potri.014G069200.2 | 4.2176   | 0.284   | 3.8925 | Up | 2.90E-14  | 1.02E-13  |
| Unigene95226  | Potri.010G205700.1 | 336.1058 | 22.6318 | 3.8925 | Up | 0         | 0         |
| Unigene86712  | Potri.009G062700.1 | 3.9134   | 0.2635  | 3.8925 | Up | 1.14E-07  | 2.82E-07  |
| Unigene71202  | Potri.006G062900.5 | 14.7721  | 0.9947  | 3.8925 | Up | 1.54E-17  | 6.24E-17  |
| Unigene69031  | Potri.002G048200.1 | 9.7039   | 0.6534  | 3.8925 | Up | 7.95E-34  | 5.34E-33  |
| Unigene65353  | Potri.001G353800.1 | 3.8317   | 0.258   | 3.8925 | Up | 2.90E-14  | 1.02E-13  |
| Unigene89539  | Potri.001G056000.2 | 3.334    | 0.2245  | 3.8925 | Up | 1.14E-07  | 2.82E-07  |
| Unigene63337  | Potri.004G194200.1 | 3.0294   | 0.204   | 3.8924 | Up | 1.14E-07  | 2.82E-07  |
| Unigene89031  | Potri.001G296400.1 | 3.4497   | 0.2323  | 3.8924 | Up | 1.14E-07  | 2.82E-07  |
| Unigene80226  | Potri.001G292700.1 | 4.8323   | 0.3254  | 3.8924 | Up | 1.14E-07  | 2.82E-07  |
| Unigene92668  | Potri.001G267500.1 | 4.8323   | 0.3254  | 3.8924 | Up | 2.90E-14  | 1.02E-13  |
| Unigene101645 | Potri.001G218800.1 | 4.8917   | 0.3294  | 3.8924 | Up | 1.14E-07  | 2.82E-07  |
| Unigene68687  | Potri.012G038800.1 | 4.5098   | 0.3037  | 3.8923 | Up | 8.34E-21  | 3.81E-20  |
| Unigene84115  | Potri.003G210200.1 | 4.3403   | 0.2923  | 3.8923 | Up | 1.14E-07  | 2.82E-07  |
| Unigene114285 | Potri.007G138100.1 | 310.4105 | 20.9204 | 3.8912 | Up | 0         | 0         |
| Unigene118036 | Potri.005G026700.1 | 274.829  | 18.5932 | 3.8857 | Up | 0         | 0         |
| Unigene66975  | Potri.005G036200.1 | 7.189    | 0.4864  | 3.8856 | Up | 2.62E-43  | 2.22E-42  |
| Unigene11473  | Potri.018G063800.1 | 12.0359  | 0.8144  | 3.8855 | Up | 3.65E-85  | 6.42E-84  |
| Unigene24879  | Potri.001G335300.3 | 10.1193  | 0.6847  | 3.8855 | Up | 2.62E-43  | 2.22E-42  |
| Unigene95584  | Potri.013G069800.1 | 87.8235  | 5.9669  | 3.8796 | Up | 2.95E-158 | 1.13E-156 |
| Unigene10382  | Potri.010G120200.1 | 11.4372  | 0.7771  | 3.8795 | Up | 2.71E-46  | 2.45E-45  |
| Unigene93595  | Potri.012G111100.1 | 5.8667   | 0.3992  | 3.8774 | Up | 1.51E-20  | 6.86E-20  |
| Unigene66285  | Potri.001G205400.1 | 4.1916   | 0.2858  | 3.8744 | Up | 2.80E-17  | 1.12E-16  |
| Unigene58204  | Potri.002G131900.1 | 7.2578   | 0.4949  | 3.8743 | Up | 2.80E-17  | 1.12E-16  |
| Unigene37142  | Potri.001G108100.3 | 44.7204  | 3.0507  | 3.8737 | Up | 7.74E-94  | 1.52E-92  |
| Unigene65112  | Potri.008G024300.3 | 10.0695  | 0.6876  | 3.8723 | Up | 4.67E-30  | 2.84E-29  |
| Unigene92044  | Potri.014G160400.5 | 10.3977  | 0.7112  | 3.8699 | Up | 8.36E-27  | 4.62E-26  |



|               |                     |          |         |        |    |           |           |
|---------------|---------------------|----------|---------|--------|----|-----------|-----------|
| Unigene90563  | Potri.012G125900.2  | 6.0878   | 0.4164  | 3.8699 | Up | 5.27E-14  | 1.84E-13  |
| Unigene40658  | Potri.016G104400.1  | 29.1547  | 1.9943  | 3.8698 | Up | 5.81E-65  | 7.53E-64  |
| Unigene69338  | Potri.002G214400.2  | 5.8747   | 0.4019  | 3.8696 | Up | 5.27E-14  | 1.84E-13  |
| Unigene4784   | Potri.015G013900.2  | 292.205  | 20.0113 | 3.8681 | Up | 0         | 0         |
| Unigene62924  | Potri.005G215500.1  | 9.7475   | 0.6677  | 3.8678 | Up | 2.68E-36  | 1.92E-35  |
| Unigene88358  | Potri.001G376600.1  | 12.3583  | 0.8473  | 3.8665 | Up | 1.51E-23  | 7.54E-23  |
| Unigene115396 | Potri.001G119500.2  | 917.4653 | 62.9289 | 3.8659 | Up | 0         | 0         |
| Unigene23296  | Potri.006G250900.1  | 61.8604  | 4.2456  | 3.865  | Up | 2.62E-137 | 8.39E-136 |
| Unigene59003  | Potri.003G178700.1  | 8.0605   | 0.5534  | 3.8645 | Up | 1.57E-42  | 1.30E-41  |
| Unigene30467  | Potri.015G048800.2  | 7.6055   | 0.523   | 3.8622 | Up | 2.75E-20  | 1.24E-19  |
| Unigene68365  | Potri.012G111400.1  | 3.6371   | 0.2501  | 3.8622 | Up | 1.02E-10  | 3.04E-10  |
| Unigene56373  | Potri.010G057900.1  | 5.9026   | 0.4059  | 3.8622 | Up | 1.02E-10  | 3.04E-10  |
| Unigene59288  | Potri.004G027700.1  | 6.5905   | 0.4532  | 3.8622 | Up | 2.75E-20  | 1.24E-19  |
| Unigene91280  | Potri.007G095200.10 | 4.2447   | 0.2919  | 3.8621 | Up | 1.02E-10  | 3.03E-10  |
| Unigene58842  | Potri.011G088700.1  | 3.007    | 0.2068  | 3.862  | Up | 1.02E-10  | 3.04E-10  |
| Unigene54154  | Potri.008G156500.1  | 8.4126   | 0.5794  | 3.8599 | Up | 1.62E-45  | 1.44E-44  |
| Unigene93043  | Potri.008G201400.2  | 8.8137   | 0.6077  | 3.8583 | Up | 1.52E-26  | 8.32E-26  |
| Unigene8890   | Potri.008G026200.2  | 11.2619  | 0.7765  | 3.8583 | Up | 1.52E-26  | 8.32E-26  |
| Unigene49645  | Potri.001G061800.1  | 8.3142   | 0.5752  | 3.8534 | Up | 2.74E-23  | 1.36E-22  |
| Unigene60089  | Potri.015G132200.1  | 3.3298   | 0.2304  | 3.8532 | Up | 2.74E-23  | 1.36E-22  |
| Unigene38758  | Potri.019G000200.1  | 27.34    | 1.8935  | 3.8519 | Up | 1.04E-57  | 1.19E-56  |
| Unigene68171  | Potri.001G411300.2  | 3.4619   | 0.2406  | 3.8469 | Up | 2.08E-07  | 5.04E-07  |
| Unigene68984  | Potri.001G303400.1  | 4.3469   | 0.3021  | 3.8469 | Up | 2.75E-26  | 1.50E-25  |
| Unigene62575  | Potri.007G029400.3  | 5.1163   | 0.3556  | 3.8468 | Up | 2.08E-07  | 5.04E-07  |
| Unigene85038  | Potri.012G044500.1  | 4.0714   | 0.283   | 3.8467 | Up | 2.08E-07  | 5.04E-07  |
| Unigene84996  | Potri.011G089600.1  | 4.0714   | 0.283   | 3.8467 | Up | 2.08E-07  | 5.04E-07  |
| Unigene92425  | Potri.008G018000.1  | 4.8686   | 0.3384  | 3.8467 | Up | 9.57E-14  | 3.30E-13  |
| Unigene67153  | Potri.005G251100.2  | 4.778    | 0.3321  | 3.8467 | Up | 2.08E-07  | 5.04E-07  |
| Unigene65863  | Potri.005G242700.5  | 4.0786   | 0.2835  | 3.8467 | Up | 9.57E-14  | 3.30E-13  |
| Unigene56788  | Potri.001G321800.1  | 5.48     | 0.3809  | 3.8467 | Up | 2.08E-07  | 5.04E-07  |
| Unigene70777  | Potri.001G002500.2  | 11.5053  | 0.7997  | 3.8467 | Up | 9.57E-14  | 3.30E-13  |
| Unigene63203  | Potri.013G084000.1  | 3.4723   | 0.2414  | 3.8464 | Up | 2.08E-07  | 5.04E-07  |
| Unigene29614  | Potri.011G166400.1  | 41.8981  | 2.9244  | 3.8407 | Up | 5.35E-264 | 3.96E-262 |
| Unigene63303  | Potri.004G178600.5  | 6.3401   | 0.4435  | 3.8375 | Up | 9.22E-17  | 3.63E-16  |
| Unigene89484  | Potri.008G112700.1  | 27.346   | 1.919   | 3.8329 | Up | 1.08E-53  | 1.14E-52  |
| Unigene89918  | Potri.007G134600.1  | 4.6624   | 0.3276  | 3.8311 | Up | 1.85E-10  | 5.43E-10  |
| Unigene62256  | Potri.006G014100.2  | 7.6941   | 0.5406  | 3.8311 | Up | 1.85E-10  | 5.43E-10  |
| Unigene73763  | Potri.009G156200.1  | 8.0933   | 0.5687  | 3.831  | Up | 1.85E-10  | 5.43E-10  |

|               |                    |         |        |        |    |           |           |
|---------------|--------------------|---------|--------|--------|----|-----------|-----------|
| Unigene65281  | Potri.004G129900.4 | 3.3059  | 0.2323 | 3.831  | Up | 1.85E-10  | 5.43E-10  |
| Unigene93706  | Potri.001G013200.1 | 5.4817  | 0.3852 | 3.8309 | Up | 9.06E-20  | 4.00E-19  |
| Unigene93162  | Potri.019G076100.2 | 10.5487 | 0.7428 | 3.8279 | Up | 5.14E-32  | 3.30E-31  |
| Unigene2183   | Potri.007G107600.1 | 64.9032 | 4.5835 | 3.8238 | Up | 2.10E-132 | 6.40E-131 |
| Unigene75850  | Potri.019G124200.3 | 10.203  | 0.7208 | 3.8233 | Up | 1.74E-13  | 5.92E-13  |
| Unigene85981  | Potri.004G041000.1 | 7.6867  | 0.543  | 3.8233 | Up | 1.74E-13  | 5.92E-13  |
| Unigene66477  | Potri.010G111100.1 | 4.1219  | 0.2912 | 3.8232 | Up | 1.74E-13  | 5.92E-13  |
| Unigene64405  | Potri.009G138200.4 | 5.1947  | 0.367  | 3.8232 | Up | 1.74E-13  | 5.92E-13  |
| Unigene88303  | Potri.007G055700.1 | 6.8948  | 0.4871 | 3.8232 | Up | 1.74E-13  | 5.92E-13  |
| Unigene88637  | Potri.005G026600.2 | 6.7516  | 0.477  | 3.8232 | Up | 1.74E-13  | 5.92E-13  |
| Unigene94069  | Potri.002G141000.1 | 3.1041  | 0.2193 | 3.8232 | Up | 1.74E-13  | 5.92E-13  |
| Unigene93569  | Potri.012G078000.2 | 3.7858  | 0.2675 | 3.823  | Up | 1.74E-13  | 5.92E-13  |
| Unigene19495  | Potri.003G171100.2 | 46.443  | 3.2836 | 3.8221 | Up | 2.32E-65  | 3.03E-64  |
| Unigene40726  | Potri.002G064100.1 | 36.9531 | 2.6127 | 3.8221 | Up | 2.32E-65  | 3.03E-64  |
| Unigene117085 | Potri.011G112400.1 | 16.4812 | 1.1682 | 3.8185 | Up | 9.31E-32  | 5.93E-31  |
| Unigene39049  | Potri.005G251400.1 | 58.9319 | 4.1811 | 3.8171 | Up | 7.23E-165 | 2.95E-163 |
| Unigene92749  | Potri.017G114500.1 | 12.4332 | 0.8823 | 3.8168 | Up | 9.52E-35  | 6.55E-34  |
| Unigene88552  | Potri.001G371500.2 | 10.1321 | 0.7197 | 3.8154 | Up | 1.64E-19  | 7.18E-19  |
| Unigene92428  | Potri.006G216500.2 | 14.2616 | 1.0131 | 3.8153 | Up | 9.77E-38  | 7.26E-37  |
| Unigene94071  | Potri.008G029300.4 | 5.3939  | 0.3838 | 3.8129 | Up | 1.63E-22  | 7.88E-22  |
| Unigene93911  | Potri.006G218900.1 | 8.3071  | 0.5927 | 3.809  | Up | 1.69E-31  | 1.07E-30  |
| Unigene93510  | Potri.010G142600.4 | 21.9744 | 1.5692 | 3.8077 | Up | 1.51E-70  | 2.14E-69  |
| Unigene34022  | Potri.012G079700.4 | 18.3543 | 1.3108 | 3.8076 | Up | 1.54E-106 | 3.57E-105 |
| Unigene36055  | Potri.014G123100.1 | 18.3123 | 1.3088 | 3.8065 | Up | 1.83E-82  | 3.11E-81  |
| Unigene5247   | Potri.001G450000.2 | 78.487  | 5.6285 | 3.8016 | Up | 7.89E-130 | 2.34E-128 |
| Unigene65759  | Potri.013G022700.2 | 4.6495  | 0.3339 | 3.7996 | Up | 3.37E-10  | 9.72E-10  |
| Unigene66967  | Potri.010G000800.1 | 4.4546  | 0.3199 | 3.7996 | Up | 3.03E-16  | 1.17E-15  |
| Unigene89707  | Potri.012G075600.1 | 3.0911  | 0.222  | 3.7995 | Up | 3.79E-07  | 9.00E-07  |
| Unigene93935  | Potri.002G198800.1 | 3.2624  | 0.2343 | 3.7995 | Up | 3.15E-13  | 1.06E-12  |
| Unigene67910  | Potri.014G016800.1 | 3.8191  | 0.2743 | 3.7994 | Up | 3.79E-07  | 9.00E-07  |
| Unigene93462  | Potri.013G152300.1 | 5.7779  | 0.415  | 3.7994 | Up | 2.97E-19  | 1.29E-18  |
| Unigene91974  | Potri.011G096700.1 | 3.7466  | 0.2691 | 3.7994 | Up | 3.37E-10  | 9.72E-10  |
| Unigene13963  | Potri.002G256600.5 | 7.1273  | 0.5119 | 3.7994 | Up | 2.97E-19  | 1.29E-18  |
| Unigene84015  | Potri.001G286100.1 | 8.1381  | 0.5845 | 3.7994 | Up | 3.15E-13  | 1.06E-12  |
| Unigene84796  | Potri.001G275900.4 | 3.968   | 0.285  | 3.7994 | Up | 3.79E-07  | 9.00E-07  |
| Unigene70345  | Potri.006G195600.2 | 4.5735  | 0.3285 | 3.7993 | Up | 2.97E-19  | 1.29E-18  |
| Unigene74826  | Potri.003G046100.1 | 5.1566  | 0.3704 | 3.7993 | Up | 3.79E-07  | 9.00E-07  |
| Unigene86613  | Potri.002G081600.1 | 3.6809  | 0.2644 | 3.7993 | Up | 3.79E-07  | 9.00E-07  |

|               |                    |           |         |        |    |           |           |
|---------------|--------------------|-----------|---------|--------|----|-----------|-----------|
| Unigene57268  | Potri.006G244900.1 | 3         | 0.2155  | 3.7992 | Up | 3.79E-07  | 9.00E-07  |
| Unigene90684  | Potri.002G235700.1 | 5.7384    | 0.4122  | 3.7992 | Up | 3.15E-13  | 1.06E-12  |
| Unigene3711   | Potri.012G115800.1 | 14.6651   | 1.0585  | 3.7923 | Up | 1.96E-81  | 3.28E-80  |
| Unigene9245   | Potri.018G034800.1 | 9.0451    | 0.653   | 3.792  | Up | 5.96E-40  | 4.67E-39  |
| Unigene114092 | Potri.001G254700.1 | 153.7194  | 11.1118 | 3.7901 | Up | 5.41E-217 | 3.09E-215 |
| Unigene96730  | Potri.001G054400.1 | 207.5443  | 15.0089 | 3.7895 | Up | 0         | 0         |
| Unigene73344  | Potri.018G081900.1 | 23.6879   | 1.7141  | 3.7886 | Up | 5.43E-28  | 3.11E-27  |
| Unigene64557  | Potri.011G111400.8 | 6.5335    | 0.4728  | 3.7886 | Up | 5.43E-28  | 3.11E-27  |
| Unigene28617  | Potri.013G131300.1 | 7.5617    | 0.5483  | 3.7857 | Up | 5.35E-22  | 2.54E-21  |
| Unigene77205  | Potri.010G111600.1 | 16.8659   | 1.223   | 3.7856 | Up | 5.35E-22  | 2.54E-21  |
| Unigene113222 | Potri.017G090600.1 | 356.1219  | 25.8333 | 3.7851 | Up | 0         | 0         |
| Unigene62340  | Potri.014G161000.2 | 3.3163    | 0.2409  | 3.7831 | Up | 5.38E-19  | 2.31E-18  |
| Unigene68155  | Potri.001G208200.5 | 5.2826    | 0.3845  | 3.7802 | Up | 9.99E-31  | 6.19E-30  |
| Unigene94274  | Potri.017G128800.2 | 6.5718    | 0.4784  | 3.78   | Up | 9.99E-31  | 6.19E-30  |
| Unigene117585 | Potri.012G038800.2 | 96.7174   | 7.0405  | 3.78   | Up | 1.15E-191 | 5.69E-190 |
| Unigene67695  | Potri.005G043200.1 | 4.0412    | 0.2942  | 3.7799 | Up | 5.49E-16  | 2.09E-15  |
| Unigene70270  | Potri.004G057100.9 | 4.2595    | 0.3101  | 3.7799 | Up | 5.49E-16  | 2.09E-15  |
| Unigene63977  | Potri.018G113400.2 | 8.6641    | 0.6328  | 3.7752 | Up | 9.71E-25  | 5.04E-24  |
| Unigene85164  | Potri.010G107200.1 | 7.6947    | 0.562   | 3.7752 | Up | 5.70E-13  | 1.90E-12  |
| Unigene98878  | Potri.009G093300.1 | 22.7041   | 1.6598  | 3.7739 | Up | 7.96E-57  | 8.93E-56  |
| Unigene67859  | Potri.018G145200.1 | 8.1849    | 0.5984  | 3.7738 | Up | 7.96E-57  | 8.93E-56  |
| Unigene46532  | Potri.019G130700.1 | 32.8414   | 2.4015  | 3.7735 | Up | 3.77E-45  | 3.31E-44  |
| Unigene19962  | Potri.018G105300.3 | 30.8734   | 2.2576  | 3.7735 | Up | 3.77E-45  | 3.31E-44  |
| Unigene93428  | Potri.002G168200.1 | 9.5192    | 0.6977  | 3.7702 | Up | 1.81E-30  | 1.11E-29  |
| Unigene62273  | Potri.003G003700.1 | 6.6534    | 0.4887  | 3.7671 | Up | 1.78E-27  | 1.00E-26  |
| Unigene64970  | Potri.014G085300.3 | 4.7988    | 0.3525  | 3.767  | Up | 6.10E-10  | 1.74E-09  |
| Unigene75425  | Potri.003G068900.2 | 14.8523   | 1.091   | 3.767  | Up | 9.74E-19  | 4.14E-18  |
| Unigene71693  | Potri.017G126200.1 | 8.045     | 0.591   | 3.7669 | Up | 6.10E-10  | 1.74E-09  |
| Unigene62392  | Potri.011G051600.1 | 5.9897    | 0.44    | 3.7669 | Up | 9.74E-19  | 4.14E-18  |
| Unigene65561  | Potri.010G168500.2 | 3.1744    | 0.2332  | 3.7668 | Up | 6.10E-10  | 1.74E-09  |
| Unigene119377 | Potri.009G081500.1 | 1034.7784 | 76.3074 | 3.7614 | Up | 0         | 0         |
| Unigene74134  | Potri.009G081600.3 | 12.7237   | 0.9389  | 3.7604 | Up | 9.93E-16  | 3.73E-15  |
| Unigene92873  | Potri.013G114600.1 | 5.3077    | 0.3917  | 3.7603 | Up | 9.93E-16  | 3.73E-15  |
| Unigene27577  | Potri.005G155900.1 | 31.4888   | 2.3253  | 3.7594 | Up | 1.47E-113 | 3.68E-112 |
| Unigene92376  | Potri.012G113400.2 | 10.3522   | 0.7662  | 3.7561 | Up | 3.21E-27  | 1.80E-26  |
| Unigene51322  | Potri.012G102200.5 | 61.1929   | 4.5427  | 3.7517 | Up | 8.62E-113 | 2.14E-111 |
| Unigene72688  | Potri.008G100200.1 | 5.2004    | 0.3864  | 3.7505 | Up | 6.87E-07  | 1.60E-06  |
| Unigene67006  | Potri.008G049900.1 | 3.8358    | 0.285   | 3.7505 | Up | 6.87E-07  | 1.60E-06  |

|              |                    |          |         |        |    |           |           |
|--------------|--------------------|----------|---------|--------|----|-----------|-----------|
| Unigene57950 | Potri.002G138500.1 | 5.3285   | 0.3959  | 3.7505 | Up | 6.87E-07  | 1.60E-06  |
| Unigene53971 | Potri.012G074800.1 | 6.1112   | 0.4541  | 3.7504 | Up | 1.76E-18  | 7.41E-18  |
| Unigene89029 | Potri.010G192600.5 | 3.1263   | 0.2323  | 3.7504 | Up | 6.87E-07  | 1.60E-06  |
| Unigene65597 | Potri.010G093200.2 | 3.4669   | 0.2576  | 3.7504 | Up | 6.87E-07  | 1.60E-06  |
| Unigene79304 | Potri.007G013900.1 | 4.4883   | 0.3335  | 3.7504 | Up | 6.87E-07  | 1.60E-06  |
| Unigene63925 | Potri.003G078800.1 | 3.4669   | 0.2576  | 3.7504 | Up | 6.87E-07  | 1.60E-06  |
| Unigene61018 | Potri.002G136000.2 | 4.2754   | 0.3177  | 3.7503 | Up | 6.87E-07  | 1.60E-06  |
| Unigene88965 | Potri.006G037600.1 | 3.1353   | 0.233   | 3.7502 | Up | 6.87E-07  | 1.60E-06  |
| Unigene69507 | Potri.002G253200.1 | 7.4319   | 0.5539  | 3.746  | Up | 1.09E-32  | 7.12E-32  |
| Unigene89988 | Potri.008G112800.1 | 23.287   | 1.7377  | 3.7443 | Up | 7.50E-47  | 6.86E-46  |
| Unigene68418 | Potri.008G100100.2 | 7.8403   | 0.5854  | 3.7434 | Up | 3.87E-41  | 3.12E-40  |
| Unigene47303 | Potri.001G186800.3 | 13.0807  | 0.9767  | 3.7434 | Up | 3.16E-21  | 1.47E-20  |
| Unigene85570 | Potri.019G054900.3 | 12.9905  | 0.97    | 3.7433 | Up | 3.16E-21  | 1.47E-20  |
| Unigene85181 | Potri.003G158800.1 | 9.3901   | 0.7025  | 3.7406 | Up | 1.80E-15  | 6.68E-15  |
| Unigene69808 | Potri.011G062600.1 | 5.4199   | 0.4055  | 3.7405 | Up | 1.06E-29  | 6.40E-29  |
| Unigene93018 | Potri.006G000400.1 | 5.096    | 0.3813  | 3.7404 | Up | 1.80E-15  | 6.68E-15  |
| Unigene4379  | Potri.006G245400.1 | 208.2558 | 15.5927 | 3.7394 | Up | 0         | 0         |
| Unigene93886 | Potri.010G001800.1 | 10.426   | 0.7809  | 3.7389 | Up | 3.75E-38  | 2.81E-37  |
| Unigene48681 | Potri.010G192600.4 | 4.875    | 0.3664  | 3.7339 | Up | 1.10E-09  | 3.09E-09  |
| Unigene67226 | Potri.017G039500.2 | 8.4198   | 0.635   | 3.729  | Up | 5.71E-21  | 2.62E-20  |
| Unigene94006 | Potri.004G183300.2 | 21.7187  | 1.6391  | 3.728  | Up | 1.63E-82  | 2.76E-81  |
| Unigene93880 | Potri.009G039100.2 | 6.3846   | 0.4827  | 3.7254 | Up | 1.03E-23  | 5.20E-23  |
| Unigene57466 | Potri.002G167700.6 | 6.7069   | 0.5071  | 3.7253 | Up | 1.87E-12  | 6.06E-12  |
| Unigene66761 | Potri.003G053000.1 | 5.2756   | 0.3989  | 3.7252 | Up | 1.87E-12  | 6.06E-12  |
| Unigene93879 | Potri.014G093100.1 | 3.1923   | 0.2414  | 3.7251 | Up | 1.87E-12  | 6.06E-12  |
| Unigene12795 | Potri.011G165600.1 | 59.1009  | 4.4739  | 3.7236 | Up | 3.26E-157 | 1.24E-155 |
| Unigene90784 | Potri.009G027500.1 | 29.6314  | 2.2438  | 3.7231 | Up | 1.09E-62  | 1.35E-61  |
| Unigene47106 | Potri.002G113000.3 | 42.5331  | 3.222   | 3.7226 | Up | 1.47E-101 | 3.21E-100 |
| Unigene78274 | Potri.001G268200.2 | 11.2215  | 0.8514  | 3.7203 | Up | 3.24E-15  | 1.19E-14  |
| Unigene13559 | Potri.001G019100.2 | 17.577   | 1.3336  | 3.7203 | Up | 4.24E-43  | 3.57E-42  |
| Unigene45133 | Potri.003G151100.1 | 47.4781  | 3.6082  | 3.7179 | Up | 1.83E-283 | 1.49E-281 |
| Unigene85737 | Potri.009G078500.3 | 10.8207  | 0.8229  | 3.7169 | Up | 5.74E-18  | 2.37E-17  |
| Unigene85523 | Potri.001G400800.1 | 10.9326  | 0.8314  | 3.7169 | Up | 5.74E-18  | 2.37E-17  |
| Unigene59994 | Potri.003G178000.1 | 9.5209   | 0.7241  | 3.7168 | Up | 2.80E-51  | 2.80E-50  |
| Unigene20793 | Potri.018G069300.1 | 14.0204  | 1.0688  | 3.7135 | Up | 7.65E-43  | 6.40E-42  |
| Unigene7948  | Potri.001G234600.1 | 97.4801  | 7.4328  | 3.7131 | Up | 0         | 0         |
| Unigene27389 | Potri.015G081700.1 | 10.6436  | 0.8118  | 3.7127 | Up | 1.87E-23  | 9.29E-23  |
| Unigene24527 | Potri.001G381000.1 | 55.1839  | 4.2237  | 3.7077 | Up | 4.67E-289 | 3.95E-287 |

|              |                    |         |        |        |    |          |          |
|--------------|--------------------|---------|--------|--------|----|----------|----------|
| Unigene65098 | Potri.013G065100.1 | 3.413   | 0.2626 | 3.7001 | Up | 2.00E-09 | 5.51E-09 |
| Unigene77427 | Potri.017G039500.2 | 4.5212  | 0.3479 | 3.7    | Up | 1.25E-06 | 2.84E-06 |
| Unigene64649 | Potri.010G208400.1 | 3.3854  | 0.2605 | 3.7    | Up | 3.36E-23 | 1.66E-22 |
| Unigene86516 | Potri.008G103600.1 | 3.4582  | 0.2661 | 3.7    | Up | 1.25E-06 | 2.84E-06 |
| Unigene88021 | Potri.016G019800.4 | 8.0091  | 0.6163 | 3.6999 | Up | 5.86E-15 | 2.13E-14 |
| Unigene89377 | Potri.014G085600.1 | 11.801  | 0.9081 | 3.6999 | Up | 3.36E-23 | 1.66E-22 |
| Unigene91509 | Potri.002G157400.1 | 4.9264  | 0.3791 | 3.6999 | Up | 3.37E-12 | 1.08E-11 |
| Unigene67454 | Potri.T025500.1    | 5.4395  | 0.4186 | 3.6998 | Up | 3.37E-12 | 1.08E-11 |
| Unigene4234  | Potri.017G096900.1 | 6.4152  | 0.4937 | 3.6998 | Up | 1.13E-28 | 6.58E-28 |
| Unigene87825 | Potri.016G143700.1 | 3.2434  | 0.2496 | 3.6998 | Up | 1.25E-06 | 2.84E-06 |
| Unigene68490 | Potri.012G077000.1 | 5.6837  | 0.4374 | 3.6998 | Up | 3.36E-23 | 1.66E-22 |
| Unigene86560 | Potri.005G087200.1 | 6.8936  | 0.5305 | 3.6998 | Up | 3.37E-12 | 1.08E-11 |
| Unigene86665 | Potri.014G147100.1 | 3.4355  | 0.2644 | 3.6997 | Up | 1.25E-06 | 2.84E-06 |
| Unigene33099 | Potri.005G235200.1 | 90.7057 | 6.9841 | 3.699  | Up | 0        | 0        |
| Unigene93005 | Potri.014G040500.1 | 15.8737 | 1.227  | 3.6934 | Up | 8.36E-45 | 7.30E-44 |
| Unigene23561 | Potri.001G023100.2 | 33.9087 | 2.6228 | 3.6925 | Up | 3.08E-77 | 4.85E-76 |
| Unigene87321 | Potri.010G148300.1 | 41.3384 | 3.1995 | 3.6916 | Up | 4.52E-69 | 6.27E-68 |
| Unigene64856 | Potri.004G073500.1 | 5.221   | 0.4054 | 3.6869 | Up | 6.06E-23 | 2.97E-22 |
| Unigene25953 | Potri.002G192500.1 | 20.5983 | 1.5994 | 3.6869 | Up | 6.06E-23 | 2.97E-22 |
| Unigene92364 | Potri.001G110200.1 | 8.7903  | 0.6826 | 3.6868 | Up | 6.06E-23 | 2.97E-22 |
| Unigene9259  | Potri.018G100700.4 | 29.7374 | 2.312  | 3.6851 | Up | 6.37E-58 | 7.29E-57 |
| Unigene93742 | Potri.018G100600.1 | 4.8831  | 0.3803 | 3.6826 | Up | 1.87E-17 | 7.55E-17 |
| Unigene93690 | Potri.011G155800.1 | 4.1377  | 0.323  | 3.6792 | Up | 1.06E-14 | 3.80E-14 |
| Unigene94183 | Potri.003G178700.1 | 9.8482  | 0.7688 | 3.6792 | Up | 1.45E-41 | 1.18E-40 |
| Unigene25864 | Potri.018G072700.5 | 7.6597  | 0.598  | 3.6791 | Up | 1.06E-14 | 3.80E-14 |
| Unigene15776 | Potri.015G071400.1 | 15.6931 | 1.2252 | 3.679  | Up | 3.65E-28 | 2.10E-27 |
| Unigene64796 | Potri.010G233100.1 | 6.7728  | 0.5288 | 3.679  | Up | 3.65E-28 | 2.10E-27 |
| Unigene20586 | Potri.010G083200.2 | 6.1018  | 0.4771 | 3.6769 | Up | 1.99E-25 | 1.06E-24 |
| Unigene63220 | Potri.008G187700.1 | 6.1179  | 0.4784 | 3.6767 | Up | 1.99E-25 | 1.05E-24 |
| Unigene93902 | Potri.010G066500.1 | 3.0437  | 0.2385 | 3.6738 | Up | 6.08E-12 | 1.93E-11 |
| Unigene81829 | Potri.018G063000.2 | 7.9824  | 0.6255 | 3.6737 | Up | 6.08E-12 | 1.93E-11 |
| Unigene91360 | Potri.014G053500.2 | 4.9196  | 0.3855 | 3.6737 | Up | 6.08E-12 | 1.93E-11 |
| Unigene25975 | Potri.003G142700.2 | 8.1983  | 0.6434 | 3.6715 | Up | 1.21E-30 | 7.49E-30 |
| Unigene15605 | Potri.007G009700.3 | 7.2116  | 0.566  | 3.6714 | Up | 1.21E-30 | 7.49E-30 |
| Unigene7291  | Potri.008G074700.1 | 17.013  | 1.3359 | 3.6708 | Up | 8.52E-68 | 1.16E-66 |
| Unigene91874 | Potri.005G176500.1 | 3.4521  | 0.2721 | 3.6653 | Up | 3.61E-09 | 9.80E-09 |
| Unigene90237 | Potri.010G207900.1 | 4.0672  | 0.3206 | 3.6652 | Up | 3.61E-09 | 9.81E-09 |
| Unigene64647 | Potri.006G129500.1 | 4.9173  | 0.3876 | 3.6652 | Up | 3.61E-09 | 9.81E-09 |

|               |                    |          |         |        |    |           |           |
|---------------|--------------------|----------|---------|--------|----|-----------|-----------|
| Unigene82492  | Potri.006G051800.2 | 5.837    | 0.4601  | 3.6652 | Up | 3.61E-09  | 9.81E-09  |
| Unigene63197  | Potri.004G075100.2 | 5.7063   | 0.4498  | 3.6652 | Up | 3.61E-09  | 9.81E-09  |
| Unigene67070  | Potri.003G063100.1 | 5.9447   | 0.4686  | 3.6652 | Up | 4.03E-33  | 2.67E-32  |
| Unigene63649  | Potri.002G141600.1 | 3.4836   | 0.2746  | 3.6652 | Up | 3.61E-09  | 9.81E-09  |
| Unigene40843  | Potri.013G125000.1 | 13.0429  | 1.0282  | 3.6651 | Up | 4.03E-33  | 2.67E-32  |
| Unigene89557  | Potri.002G236800.1 | 12.8152  | 1.0102  | 3.6651 | Up | 3.58E-25  | 1.88E-24  |
| Unigene64292  | Potri.001G289800.1 | 3.6239   | 0.2857  | 3.665  | Up | 3.61E-09  | 9.81E-09  |
| Unigene69451  | Potri.010G074400.1 | 4.2071   | 0.3317  | 3.6649 | Up | 3.37E-17  | 1.35E-16  |
| Unigene55563  | Potri.008G159100.1 | 4.0754   | 0.3213  | 3.6649 | Up | 4.03E-33  | 2.67E-32  |
| Unigene92361  | Potri.002G141600.1 | 3.2469   | 0.256   | 3.6648 | Up | 3.61E-09  | 9.80E-09  |
| Unigene37759  | Potri.018G107300.2 | 8.1306   | 0.6434  | 3.6596 | Up | 1.35E-35  | 9.49E-35  |
| Unigene37922  | Potri.011G112400.1 | 34.4388  | 2.7264  | 3.659  | Up | 7.69E-62  | 9.44E-61  |
| Unigene23997  | Potri.006G139400.2 | 142.1666 | 11.2544 | 3.659  | Up | 0         | 0         |
| Unigene66036  | Potri.006G257200.3 | 5.9123   | 0.4684  | 3.6579 | Up | 1.90E-14  | 6.77E-14  |
| Unigene43012  | Potri.005G251400.1 | 90.9129  | 7.2252  | 3.6534 | Up | 0         | 0         |
| Unigene68089  | Potri.002G013500.2 | 11.7131  | 0.9309  | 3.6534 | Up | 1.95E-95  | 3.92E-94  |
| Unigene25419  | Potri.003G141900.4 | 69.814   | 5.5519  | 3.6525 | Up | 5.45E-111 | 1.33E-109 |
| Unigene86512  | Potri.T060100.1    | 3.3347   | 0.2661  | 3.6475 | Up | 2.25E-06  | 5.03E-06  |
| Unigene82331  | Potri.002G034400.2 | 3.8734   | 0.3091  | 3.6475 | Up | 2.25E-06  | 5.03E-06  |
| Unigene64782  | Potri.016G124700.2 | 6.5184   | 0.5202  | 3.6474 | Up | 1.10E-11  | 3.43E-11  |
| Unigene60046  | Potri.015G140600.1 | 3.5461   | 0.283   | 3.6474 | Up | 2.25E-06  | 5.03E-06  |
| Unigene72162  | Potri.010G111500.1 | 14.6663  | 1.1704  | 3.6474 | Up | 6.06E-17  | 2.40E-16  |
| Unigene78464  | Potri.010G110800.1 | 12.7479  | 1.0173  | 3.6474 | Up | 6.06E-17  | 2.40E-16  |
| Unigene62875  | Potri.007G015900.2 | 7.3243   | 0.5845  | 3.6474 | Up | 1.10E-11  | 3.43E-11  |
| Unigene76024  | Potri.002G098000.4 | 4.4959   | 0.3588  | 3.6474 | Up | 2.25E-06  | 5.03E-06  |
| Unigene67056  | Potri.001G268300.1 | 4.9246   | 0.393   | 3.6474 | Up | 1.10E-11  | 3.43E-11  |
| Unigene92461  | Potri.010G066400.2 | 4.205    | 0.3356  | 3.6473 | Up | 1.10E-11  | 3.43E-11  |
| Unigene93235  | Potri.006G281100.3 | 9.172    | 0.732   | 3.6473 | Up | 2.13E-27  | 1.20E-26  |
| Unigene63922  | Potri.005G245600.1 | 4.1547   | 0.3316  | 3.6472 | Up | 2.13E-27  | 1.20E-26  |
| Unigene3717   | Potri.001G219300.2 | 5.1734   | 0.4129  | 3.6472 | Up | 6.06E-17  | 2.40E-16  |
| Unigene69476  | Potri.002G132100.1 | 11.0079  | 0.8821  | 3.6415 | Up | 1.16E-24  | 6.00E-24  |
| Unigene109145 | Potri.012G001500.1 | 42.5778  | 3.412   | 3.6414 | Up | 5.79E-48  | 5.43E-47  |
| Unigene54401  | Potri.001G348500.2 | 11.4727  | 0.9198  | 3.6407 | Up | 9.15E-43  | 7.65E-42  |
| Unigene90330  | Potri.001G148800.1 | 30.4105  | 2.4387  | 3.6404 | Up | 8.01E-61  | 9.66E-60  |
| Unigene63810  | Potri.018G122700.1 | 6.1728   | 0.4952  | 3.6398 | Up | 1.95E-19  | 8.51E-19  |
| Unigene69639  | Potri.001G001500.1 | 21.9749  | 1.7652  | 3.638  | Up | 3.08E-45  | 2.72E-44  |
| Unigene6700   | Potri.003G182200.1 | 10.8029  | 0.8686  | 3.6366 | Up | 4.89E-40  | 3.84E-39  |
| Unigene20191  | Potri.001G393800.1 | 24.4177  | 1.9678  | 3.6333 | Up | 3.51E-50  | 3.45E-49  |

|               |                    |          |         |        |    |           |           |
|---------------|--------------------|----------|---------|--------|----|-----------|-----------|
| Unigene81657  | Potri.001G218800.1 | 5.8281   | 0.4709  | 3.6295 | Up | 6.50E-09  | 1.74E-08  |
| Unigene25937  | Potri.010G200000.4 | 4.8758   | 0.394   | 3.6294 | Up | 6.50E-09  | 1.74E-08  |
| Unigene77186  | Potri.011G142200.1 | 6.4869   | 0.5242  | 3.6293 | Up | 6.50E-09  | 1.74E-08  |
| Unigene85237  | Potri.001G043000.3 | 5.1985   | 0.4201  | 3.6293 | Up | 6.50E-09  | 1.74E-08  |
| Unigene39790  | Potri.014G138300.1 | 35.5647  | 2.8755  | 3.6286 | Up | 1.61E-103 | 3.59E-102 |
| Unigene93108  | Potri.002G100500.1 | 23.2164  | 1.8778  | 3.628  | Up | 2.98E-65  | 3.89E-64  |
| Unigene94188  | Potri.001G402400.1 | 6.2875   | 0.5093  | 3.6259 | Up | 6.86E-27  | 3.80E-26  |
| Unigene19627  | Potri.018G031400.1 | 23.0737  | 1.8691  | 3.6258 | Up | 6.86E-27  | 3.81E-26  |
| Unigene110165 | Potri.009G041700.1 | 246.9196 | 20.0017 | 3.6258 | Up | 5.34E-281 | 4.30E-279 |
| Unigene41258  | Potri.001G151800.2 | 31.9519  | 2.5926  | 3.6234 | Up | 3.35E-47  | 3.09E-46  |
| Unigene57898  | Potri.012G069000.3 | 8.1689   | 0.6642  | 3.6205 | Up | 1.97E-11  | 6.09E-11  |
| Unigene58699  | Potri.004G089400.2 | 5.0047   | 0.4069  | 3.6205 | Up | 1.97E-11  | 6.09E-11  |
| Unigene57988  | Potri.014G143600.1 | 4.1357   | 0.3363  | 3.6203 | Up | 1.97E-11  | 6.09E-11  |
| Unigene89200  | Potri.001G155800.1 | 5.6482   | 0.4593  | 3.6203 | Up | 1.97E-11  | 6.09E-11  |
| Unigene5662   | Potri.009G115000.2 | 44.992   | 3.662   | 3.619  | Up | 1.42E-97  | 2.95E-96  |
| Unigene14071  | Potri.014G078700.1 | 110.5738 | 9.0032  | 3.6184 | Up | 1.65E-208 | 8.99E-207 |
| Unigene110822 | Potri.003G178700.1 | 10.8928  | 0.8891  | 3.6149 | Up | 6.16E-14  | 2.14E-13  |
| Unigene102525 | Potri.019G116500.1 | 69.4001  | 5.6663  | 3.6145 | Up | 2.58E-220 | 1.51E-218 |
| Unigene3110   | Potri.003G035700.1 | 38.6552  | 3.158   | 3.6136 | Up | 1.43E-202 | 7.57E-201 |
| Unigene54278  | Potri.001G148800.1 | 7.2792   | 0.5949  | 3.6131 | Up | 4.08E-29  | 2.42E-28  |
| Unigene92992  | Potri.003G178100.1 | 5.6342   | 0.461   | 3.6114 | Up | 1.96E-16  | 7.59E-16  |
| Unigene61658  | Potri.008G027000.1 | 9.3696   | 0.7716  | 3.6021 | Up | 2.43E-31  | 1.53E-30  |
| Unigene88296  | Potri.002G242900.3 | 17.7455  | 1.4613  | 3.6021 | Up | 2.43E-31  | 1.53E-30  |
| Unigene68586  | Potri.016G141300.1 | 3.0243   | 0.2506  | 3.5931 | Up | 1.17E-08  | 3.08E-08  |
| Unigene64220  | Potri.014G143600.1 | 3.8895   | 0.3223  | 3.5931 | Up | 3.52E-16  | 1.35E-15  |
| Unigene81677  | Potri.014G136600.1 | 3.7882   | 0.3139  | 3.5931 | Up | 4.06E-06  | 8.88E-06  |
| Unigene92329  | Potri.001G346300.1 | 4.1356   | 0.3427  | 3.5931 | Up | 3.55E-11  | 1.08E-10  |
| Unigene86053  | Potri.010G254600.1 | 3.2653   | 0.2706  | 3.593  | Up | 4.06E-06  | 8.88E-06  |
| Unigene83566  | Potri.010G035100.1 | 7.1571   | 0.5931  | 3.593  | Up | 3.55E-11  | 1.08E-10  |
| Unigene83187  | Potri.009G116400.1 | 5.4482   | 0.4515  | 3.593  | Up | 1.17E-08  | 3.08E-08  |
| Unigene86697  | Potri.009G014900.3 | 3.1796   | 0.2635  | 3.593  | Up | 4.06E-06  | 8.88E-06  |
| Unigene67585  | Potri.002G236000.1 | 7.3788   | 0.6115  | 3.593  | Up | 1.13E-18  | 4.79E-18  |
| Unigene88962  | Potri.002G149700.1 | 23.8933  | 1.9801  | 3.593  | Up | 1.84E-43  | 1.56E-42  |
| Unigene92034  | Potri.001G127700.3 | 4.3006   | 0.3564  | 3.593  | Up | 3.55E-11  | 1.08E-10  |
| Unigene73135  | Potri.018G034500.1 | 6.9271   | 0.5741  | 3.5929 | Up | 1.17E-08  | 3.08E-08  |
| Unigene86832  | Potri.011G044600.2 | 3.1589   | 0.2618  | 3.5929 | Up | 4.06E-06  | 8.88E-06  |
| Unigene112476 | Potri.004G202200.1 | 25.9408  | 2.1498  | 3.5929 | Up | 1.45E-33  | 9.72E-33  |
| Unigene93931  | Potri.002G196300.1 | 5.6713   | 0.47    | 3.5929 | Up | 3.68E-21  | 1.70E-20  |

|               |                    |          |         |        |    |           |           |
|---------------|--------------------|----------|---------|--------|----|-----------|-----------|
| Unigene36793  | Potri.001G305200.1 | 14.0841  | 1.1672  | 3.5929 | Up | 4.86E-36  | 3.46E-35  |
| Unigene88676  | Potri.013G133100.1 | 4.3038   | 0.3567  | 3.5928 | Up | 1.17E-08  | 3.08E-08  |
| Unigene55727  | Potri.005G149800.1 | 4.0577   | 0.3363  | 3.5928 | Up | 4.06E-06  | 8.88E-06  |
| Unigene71056  | Potri.001G320400.2 | 4.8009   | 0.3979  | 3.5928 | Up | 4.06E-06  | 8.88E-06  |
| Unigene112448 | Potri.001G054400.1 | 229.3232 | 19.0177 | 3.592  | Up | 1.08E-284 | 8.86E-283 |
| Unigene115537 | Potri.005G127900.3 | 337.2341 | 28.033  | 3.5886 | Up | 0         | 0         |
| Unigene52081  | Potri.001G256500.1 | 58.3721  | 4.8562  | 3.5874 | Up | 1.02E-99  | 2.18E-98  |
| Unigene27726  | Potri.006G263200.1 | 35.9831  | 2.9942  | 3.5871 | Up | 8.71E-95  | 1.74E-93  |
| Unigene67259  | Potri.006G016200.1 | 7.0511   | 0.5872  | 3.5859 | Up | 9.82E-41  | 7.83E-40  |
| Unigene13974  | Potri.005G241100.4 | 63.2911  | 5.2732  | 3.5853 | Up | 1.37E-72  | 2.01E-71  |
| Unigene66616  | Potri.010G023500.5 | 7.7499   | 0.6464  | 3.5837 | Up | 7.82E-31  | 4.86E-30  |
| Unigene4021   | Potri.004G116400.1 | 6.5253   | 0.5443  | 3.5836 | Up | 7.82E-31  | 4.86E-30  |
| Unigene88517  | Potri.015G140800.1 | 15.8106  | 1.3195  | 3.5828 | Up | 2.35E-28  | 1.36E-27  |
| Unigene117099 | Potri.001G278500.3 | 472.2447 | 39.4863 | 3.5801 | Up | 0         | 0         |
| Unigene106458 | Potri.001G054400.1 | 169.7076 | 14.1965 | 3.5794 | Up | 2.61E-303 | 2.34E-301 |
| Unigene69772  | Potri.013G047400.1 | 8.0891   | 0.6778  | 3.577  | Up | 1.56E-35  | 1.10E-34  |
| Unigene84071  | Potri.009G138900.1 | 12.2071  | 1.0229  | 3.577  | Up | 2.03E-18  | 8.52E-18  |
| Unigene89826  | Potri.016G053000.6 | 9.1971   | 0.7707  | 3.5769 | Up | 2.03E-18  | 8.52E-18  |
| Unigene54437  | Potri.001G072200.6 | 11.9229  | 0.9996  | 3.5762 | Up | 4.08E-50  | 3.99E-49  |
| Unigene94226  | Potri.015G023300.3 | 3.5501   | 0.298   | 3.5745 | Up | 6.31E-16  | 2.39E-15  |
| Unigene26521  | Potri.013G050800.1 | 18.3551  | 1.5421  | 3.5732 | Up | 1.06E-42  | 8.85E-42  |
| Unigene64110  | Potri.003G063900.3 | 7.6221   | 0.6406  | 3.5727 | Up | 4.22E-28  | 2.42E-27  |
| Unigene15302  | Potri.017G138900.7 | 13.4857  | 1.134   | 3.5719 | Up | 3.15E-40  | 2.48E-39  |
| Unigene94315  | Potri.003G103900.1 | 25.1367  | 2.115   | 3.5711 | Up | 9.75E-113 | 2.42E-111 |
| Unigene33413  | Potri.003G070600.2 | 179.7908 | 15.151  | 3.5688 | Up | 0         | 0         |
| Unigene47250  | Potri.006G022100.3 | 14.3568  | 1.2131  | 3.565  | Up | 1.18E-20  | 5.38E-20  |
| Unigene52079  | Potri.005G220800.1 | 20.0541  | 1.6946  | 3.5649 | Up | 7.40E-69  | 1.02E-67  |
| Unigene92010  | Potri.004G150400.1 | 4.2273   | 0.3572  | 3.5649 | Up | 6.37E-11  | 1.92E-10  |
| Unigene68212  | Potri.001G094200.1 | 4.0048   | 0.3384  | 3.5649 | Up | 6.37E-11  | 1.92E-10  |
| Unigene69138  | Potri.001G375500.3 | 3.1134   | 0.2631  | 3.5648 | Up | 6.37E-11  | 1.92E-10  |
| Unigene79818  | Potri.016G084800.1 | 13.6052  | 1.1529  | 3.5608 | Up | 3.64E-18  | 1.51E-17  |
| Unigene539    | Potri.002G206800.1 | 101.3484 | 8.5973  | 3.5593 | Up | 0         | 0         |
| Unigene92071  | Potri.011G102900.1 | 3.122    | 0.2655  | 3.5557 | Up | 2.10E-08  | 5.45E-08  |
| Unigene92327  | Potri.001G251100.2 | 3.0221   | 0.257   | 3.5557 | Up | 2.10E-08  | 5.45E-08  |
| Unigene65558  | Potri.010G047200.1 | 4.3882   | 0.3732  | 3.5556 | Up | 2.10E-08  | 5.45E-08  |
| Unigene94243  | Potri.010G058600.1 | 5.1792   | 0.4405  | 3.5555 | Up | 6.93E-23  | 3.39E-22  |
| Unigene92434  | Potri.006G211600.1 | 11.8858  | 1.0109  | 3.5555 | Up | 4.49E-30  | 2.73E-29  |
| Unigene90097  | Potri.004G115900.1 | 3.8      | 0.3232  | 3.5555 | Up | 2.10E-08  | 5.45E-08  |



|               |                    |           |         |        |    |           |           |
|---------------|--------------------|-----------|---------|--------|----|-----------|-----------|
| Unigene83752  | Potri.002G056000.1 | 10.4219   | 0.8864  | 3.5555 | Up | 1.13E-15  | 4.24E-15  |
| Unigene46717  | Potri.001G285500.1 | 130.3341  | 11.0856 | 3.5555 | Up | 4.38E-230 | 2.69E-228 |
| Unigene66497  | Potri.012G016500.1 | 3.8832    | 0.3303  | 3.5554 | Up | 2.10E-08  | 5.45E-08  |
| Unigene16172  | Potri.008G100100.2 | 12.8853   | 1.096   | 3.5554 | Up | 1.13E-15  | 4.24E-15  |
| Unigene89759  | Potri.001G199600.5 | 3.8939    | 0.3312  | 3.5554 | Up | 2.10E-08  | 5.45E-08  |
| Unigene90568  | Potri.004G040900.4 | 6.072     | 0.5192  | 3.5478 | Up | 3.56E-13  | 1.20E-12  |
| Unigene5915   | Potri.016G126900.1 | 13.9083   | 1.1919  | 3.5446 | Up | 1.60E-34  | 1.10E-33  |
| Unigene91980  | Potri.002G155200.1 | 7.3267    | 0.6279  | 3.5446 | Up | 6.51E-18  | 2.68E-17  |
| Unigene91972  | Potri.001G294600.1 | 15.6525   | 1.3455  | 3.5402 | Up | 9.60E-37  | 6.97E-36  |
| Unigene85675  | Potri.008G121000.1 | 3.1935    | 0.2752  | 3.5366 | Up | 7.31E-06  | 1.57E-05  |
| Unigene73049  | Potri.001G417000.1 | 4.4617    | 0.3845  | 3.5365 | Up | 7.31E-06  | 1.57E-05  |
| Unigene74304  | Potri.015G070500.1 | 4.3372    | 0.3738  | 3.5364 | Up | 7.31E-06  | 1.57E-05  |
| Unigene90408  | Potri.015G001300.1 | 12.2374   | 1.0547  | 3.5364 | Up | 7.30E-25  | 3.81E-24  |
| Unigene63479  | Potri.010G049600.2 | 7.97      | 0.6869  | 3.5364 | Up | 1.44E-29  | 8.62E-29  |
| Unigene76832  | Potri.006G076600.2 | 4.0899    | 0.3525  | 3.5364 | Up | 7.31E-06  | 1.57E-05  |
| Unigene89447  | Potri.005G251000.5 | 5.2387    | 0.4515  | 3.5364 | Up | 1.14E-10  | 3.38E-10  |
| Unigene79332  | Potri.001G350100.1 | 3.8533    | 0.3321  | 3.5364 | Up | 7.31E-06  | 1.57E-05  |
| Unigene67124  | Potri.007G072600.1 | 5.0863    | 0.4384  | 3.5363 | Up | 2.02E-15  | 7.51E-15  |
| Unigene30121  | Potri.011G127200.1 | 12.0675   | 1.0429  | 3.5325 | Up | 1.72E-36  | 1.24E-35  |
| Unigene37214  | Potri.006G188600.2 | 20.2779   | 1.7541  | 3.5311 | Up | 4.32E-27  | 2.41E-26  |
| Unigene94215  | Potri.001G342800.1 | 8.0924    | 0.7015  | 3.5281 | Up | 5.12E-34  | 3.46E-33  |
| Unigene100324 | Potri.013G050000.1 | 45.809    | 3.9727  | 3.5274 | Up | 6.65E-62  | 8.17E-61  |
| Unigene113681 | Potri.003G202500.1 | 875.5274  | 76.0092 | 3.5259 | Up | 0         | 0         |
| Unigene29747  | Potri.003G178700.1 | 32.8825   | 2.8553  | 3.5256 | Up | 4.04E-64  | 5.17E-63  |
| Unigene65567  | Potri.005G218900.2 | 5.2085    | 0.4525  | 3.5249 | Up | 1.31E-24  | 6.75E-24  |
| Unigene26058  | Potri.008G126800.3 | 16.7578   | 1.456   | 3.5248 | Up | 1.31E-24  | 6.75E-24  |
| Unigene54060  | Potri.006G249200.1 | 7.8927    | 0.6858  | 3.5247 | Up | 6.38E-13  | 2.12E-12  |
| Unigene51187  | Potri.006G224000.2 | 80.9419   | 7.0375  | 3.5238 | Up | 4.41E-161 | 1.73E-159 |
| Unigene111410 | Potri.003G055800.5 | 1245.6763 | 108.604 | 3.5198 | Up | 0         | 0         |
| Unigene70157  | Potri.009G144600.1 | 6.0814    | 0.5304  | 3.5193 | Up | 1.11E-40  | 8.82E-40  |
| Unigene93644  | Potri.001G172400.3 | 25.556    | 2.2289  | 3.5193 | Up | 7.08E-80  | 1.16E-78  |
| Unigene62331  | Potri.008G172200.1 | 4.0472    | 0.3535  | 3.5171 | Up | 3.62E-15  | 1.33E-14  |
| Unigene98413  | Potri.003G173900.1 | 155.8651  | 13.6141 | 3.5171 | Up | 0         | 0         |
| Unigene89498  | Potri.018G013300.1 | 3.8658    | 0.3377  | 3.517  | Up | 3.78E-08  | 9.64E-08  |
| Unigene65833  | Potri.009G093200.1 | 3.433     | 0.2999  | 3.5169 | Up | 3.78E-08  | 9.64E-08  |
| Unigene80165  | Potri.001G192800.1 | 18.6498   | 1.6335  | 3.5131 | Up | 2.33E-24  | 1.20E-23  |
| Unigene26663  | Potri.018G063200.4 | 24.3613   | 2.1348  | 3.5124 | Up | 1.98E-40  | 1.57E-39  |
| Unigene69418  | Potri.009G150600.1 | 8.0194    | 0.7032  | 3.5115 | Up | 2.08E-17  | 8.41E-17  |

|               |                    |          |         |        |    |           |           |
|---------------|--------------------|----------|---------|--------|----|-----------|-----------|
| Unigene60982  | Potri.016G119900.4 | 5.1201   | 0.449   | 3.5114 | Up | 1.63E-33  | 1.09E-32  |
| Unigene25913  | Potri.005G020300.2 | 83.5165  | 7.3346  | 3.5093 | Up | 1.71E-163 | 6.89E-162 |
| Unigene70188  | Potri.007G052300.1 | 3.1296   | 0.2752  | 3.5074 | Up | 2.05E-10  | 5.98E-10  |
| Unigene68420  | Potri.002G160500.6 | 6.062    | 0.5331  | 3.5073 | Up | 1.21E-19  | 5.32E-19  |
| Unigene63737  | Potri.019G131900.1 | 4.331    | 0.3809  | 3.5072 | Up | 2.05E-10  | 5.98E-10  |
| Unigene65411  | Potri.006G203200.4 | 6.0923   | 0.5358  | 3.5072 | Up | 1.21E-19  | 5.32E-19  |
| Unigene67376  | Potri.002G199600.1 | 6.9493   | 0.6112  | 3.5072 | Up | 2.05E-10  | 5.98E-10  |
| Unigene93054  | Potri.007G137100.1 | 3.4484   | 0.3033  | 3.5071 | Up | 2.05E-10  | 5.98E-10  |
| Unigene60578  | Potri.002G167700.7 | 4.135    | 0.3637  | 3.5071 | Up | 2.05E-10  | 5.98E-10  |
| Unigene103672 | Potri.003G035500.1 | 39.2757  | 3.4597  | 3.5049 | Up | 3.42E-90  | 6.42E-89  |
| Unigene63171  | Potri.008G050700.3 | 13.5635  | 1.1956  | 3.5039 | Up | 2.12E-42  | 1.76E-41  |
| Unigene90247  | Potri.018G131500.1 | 16.9634  | 1.4963  | 3.503  | Up | 2.91E-33  | 1.93E-32  |
| Unigene26132  | Potri.016G115300.3 | 6.8143   | 0.6011  | 3.5029 | Up | 2.91E-33  | 1.93E-32  |
| Unigene104353 | Potri.003G046200.1 | 14.8331  | 1.3084  | 3.5029 | Up | 2.91E-33  | 1.93E-32  |
| Unigene36697  | Potri.003G173900.2 | 276.1024 | 24.3652 | 3.5023 | Up | 0         | 0         |
| Unigene67077  | Potri.016G079900.4 | 4.4789   | 0.3955  | 3.5014 | Up | 1.14E-12  | 3.74E-12  |
| Unigene57476  | Potri.001G163900.1 | 4.2057   | 0.3714  | 3.5013 | Up | 4.17E-24  | 2.12E-23  |
| Unigene89977  | Potri.002G249900.4 | 19.6579  | 1.7377  | 3.4999 | Up | 1.05E-37  | 7.77E-37  |
| Unigene52376  | Potri.011G081000.1 | 28.771   | 2.5462  | 3.4982 | Up | 1.71E-53  | 1.80E-52  |
| Unigene62265  | Potri.006G039600.1 | 3.4121   | 0.3021  | 3.4976 | Up | 6.47E-15  | 2.35E-14  |
| Unigene92217  | Potri.014G127500.1 | 5.8937   | 0.5219  | 3.4973 | Up | 6.47E-15  | 2.35E-14  |
| Unigene94061  | Potri.003G008800.4 | 3.73     | 0.3303  | 3.4973 | Up | 6.47E-15  | 2.35E-14  |
| Unigene60731  | Potri.010G198800.5 | 7.5981   | 0.6733  | 3.4963 | Up | 2.28E-44  | 1.97E-43  |
| Unigene37120  | Potri.004G086900.1 | 55.2943  | 4.9024  | 3.4956 | Up | 3.54E-150 | 1.27E-148 |
| Unigene105646 | Potri.008G147000.1 | 16.3989  | 1.455   | 3.4945 | Up | 8.33E-49  | 7.94E-48  |
| Unigene65117  | Potri.002G170900.1 | 7.0527   | 0.6267  | 3.4923 | Up | 2.16E-19  | 9.41E-19  |
| Unigene48876  | Potri.005G179100.2 | 25.9928  | 2.3138  | 3.4898 | Up | 7.57E-154 | 2.80E-152 |
| Unigene94193  | Potri.001G001600.1 | 5.7057   | 0.508   | 3.4895 | Up | 7.43E-24  | 3.75E-23  |
| Unigene2972   | Potri.008G103800.1 | 24.6717  | 2.2019  | 3.486  | Up | 1.48E-126 | 4.26E-125 |
| Unigene38657  | Potri.019G037300.3 | 78.521   | 7.0122  | 3.4851 | Up | 1.86E-175 | 8.15E-174 |
| Unigene93077  | Potri.017G039500.2 | 13.5316  | 1.2086  | 3.4849 | Up | 3.33E-37  | 2.44E-36  |
| Unigene116856 | Potri.001G054400.1 | 155.7674 | 13.9149 | 3.4847 | Up | 5.88E-260 | 4.28E-258 |
| Unigene60685  | Potri.001G236000.3 | 3.0869   | 0.2771  | 3.4777 | Up | 1.31E-05  | 2.75E-05  |
| Unigene82366  | Potri.014G129000.1 | 3.4298   | 0.3079  | 3.4776 | Up | 1.31E-05  | 2.75E-05  |
| Unigene56043  | Potri.006G031900.4 | 7.0934   | 0.6368  | 3.4776 | Up | 1.33E-23  | 6.64E-23  |
| Unigene85233  | Potri.002G189200.1 | 3.1191   | 0.28    | 3.4776 | Up | 1.31E-05  | 2.75E-05  |
| Unigene63896  | Potri.018G063700.3 | 3.9698   | 0.3564  | 3.4775 | Up | 3.66E-10  | 1.05E-09  |
| Unigene46801  | Potri.014G098700.1 | 6.3091   | 0.5664  | 3.4775 | Up | 2.14E-41  | 1.74E-40  |

|              |                    |         |        |        |    |           |           |
|--------------|--------------------|---------|--------|--------|----|-----------|-----------|
| Unigene16803 | Potri.009G015800.4 | 36.5225 | 3.279  | 3.4775 | Up | 1.22E-105 | 2.78E-104 |
| Unigene48524 | Potri.005G191500.1 | 8.4629  | 0.7598 | 3.4775 | Up | 2.25E-21  | 1.05E-20  |
| Unigene69616 | Potri.005G082200.1 | 4.2226  | 0.3791 | 3.4775 | Up | 3.66E-10  | 1.05E-09  |
| Unigene84198 | Potri.003G152300.2 | 4.8652  | 0.4368 | 3.4775 | Up | 6.76E-08  | 1.70E-07  |
| Unigene64487 | Potri.003G122000.1 | 3.7692  | 0.3384 | 3.4775 | Up | 3.66E-10  | 1.05E-09  |
| Unigene76586 | Potri.002G105600.1 | 9.8589  | 0.8851 | 3.4775 | Up | 2.04E-12  | 6.60E-12  |
| Unigene86203 | Potri.017G038500.3 | 4.4909  | 0.4032 | 3.4774 | Up | 6.76E-08  | 1.70E-07  |
| Unigene79101 | Potri.013G033000.2 | 3.73    | 0.3349 | 3.4774 | Up | 1.31E-05  | 2.75E-05  |
| Unigene70873 | Potri.010G238800.1 | 6.6805  | 0.5998 | 3.4774 | Up | 6.76E-08  | 1.70E-07  |
| Unigene85025 | Potri.004G048600.1 | 3.1521  | 0.283  | 3.4774 | Up | 1.31E-05  | 2.75E-05  |
| Unigene64372 | Potri.002G184300.3 | 3.2434  | 0.2912 | 3.4774 | Up | 1.31E-05  | 2.75E-05  |
| Unigene55760 | Potri.002G009600.5 | 3.6688  | 0.3294 | 3.4774 | Up | 1.31E-05  | 2.75E-05  |
| Unigene90981 | Potri.001G471000.1 | 6.6972  | 0.6013 | 3.4774 | Up | 1.16E-14  | 4.15E-14  |
| Unigene71714 | Potri.001G350900.1 | 4.3882  | 0.394  | 3.4774 | Up | 1.31E-05  | 2.75E-05  |
| Unigene92579 | Potri.005G099300.3 | 3.6763  | 0.3301 | 3.4773 | Up | 3.66E-10  | 1.05E-09  |
| Unigene64849 | Potri.002G090700.4 | 5.9206  | 0.5316 | 3.4773 | Up | 2.04E-12  | 6.60E-12  |
| Unigene80468 | Potri.002G013200.1 | 3.6096  | 0.3241 | 3.4773 | Up | 1.31E-05  | 2.75E-05  |
| Unigene87754 | Potri.001G402400.1 | 5.5775  | 0.5008 | 3.4773 | Up | 3.66E-10  | 1.05E-09  |
| Unigene65983 | Potri.006G191500.3 | 3.2552  | 0.2923 | 3.4772 | Up | 1.31E-05  | 2.75E-05  |
| Unigene95879 | Potri.003G173100.1 | 67.7201 | 6.0937 | 3.4742 | Up | 2.95E-83  | 5.06E-82  |
| Unigene22048 | Potri.004G122900.1 | 92.9059 | 8.3604 | 3.4741 | Up | 0         | 0         |
| Unigene36667 | Potri.016G056200.5 | 11.7342 | 1.0575 | 3.472  | Up | 5.08E-50  | 4.96E-49  |
| Unigene35878 | Potri.005G208400.1 | 11.1006 | 1.0036 | 3.4674 | Up | 3.32E-54  | 3.53E-53  |
| Unigene62767 | Potri.005G227200.1 | 4.3511  | 0.3936 | 3.4666 | Up | 1.40E-25  | 7.44E-25  |
| Unigene79672 | Potri.002G140100.2 | 20.108  | 1.8191 | 3.4665 | Up | 1.40E-25  | 7.44E-25  |
| Unigene60146 | Potri.017G149000.1 | 8.2503  | 0.7469 | 3.4655 | Up | 2.36E-23  | 1.17E-22  |
| Unigene27566 | Potri.018G146100.1 | 8.2016  | 0.7427 | 3.4651 | Up | 4.90E-65  | 6.36E-64  |
| Unigene63269 | Potri.001G400800.1 | 5.5278  | 0.5009 | 3.4641 | Up | 4.02E-21  | 1.86E-20  |
| Unigene69522 | Potri.002G091000.2 | 8.8586  | 0.8037 | 3.4623 | Up | 6.88E-19  | 2.94E-18  |
| Unigene44013 | Potri.001G288100.1 | 41.3149 | 3.7527 | 3.4607 | Up | 1.96E-158 | 7.53E-157 |
| Unigene59269 | Potri.009G158600.2 | 5.7949  | 0.5276 | 3.4573 | Up | 2.06E-14  | 7.33E-14  |
| Unigene64449 | Potri.017G085400.4 | 7.5882  | 0.6909 | 3.4572 | Up | 2.06E-14  | 7.33E-14  |
| Unigene54496 | Potri.017G001600.1 | 5.1927  | 0.4728 | 3.4572 | Up | 1.48E-27  | 8.35E-27  |
| Unigene584   | Potri.016G096300.1 | 24.2184 | 2.2074 | 3.4557 | Up | 3.50E-86  | 6.26E-85  |
| Unigene85905 | Potri.002G117800.1 | 23.897  | 2.1795 | 3.4548 | Up | 3.35E-36  | 2.40E-35  |
| Unigene9091  | Potri.010G208300.1 | 18.799  | 1.7146 | 3.4547 | Up | 3.35E-36  | 2.40E-35  |
| Unigene93961 | Potri.001G034200.2 | 3.1756  | 0.2899 | 3.4534 | Up | 3.64E-12  | 1.16E-11  |
| Unigene13120 | Potri.017G071200.1 | 6.4821  | 0.5918 | 3.4533 | Up | 4.21E-23  | 2.07E-22  |

|               |                    |           |          |        |    |           |           |
|---------------|--------------------|-----------|----------|--------|----|-----------|-----------|
| Unigene93357  | Potri.015G112800.1 | 7.7625    | 0.7087   | 3.4533 | Up | 4.21E-23  | 2.07E-22  |
| Unigene87245  | Potri.008G060100.1 | 7.0309    | 0.6419   | 3.4533 | Up | 3.64E-12  | 1.16E-11  |
| Unigene36413  | Potri.001G049100.1 | 4.4602    | 0.4072   | 3.4533 | Up | 1.14E-55  | 1.25E-54  |
| Unigene119412 | Potri.002G248300.2 | 1584.0991 | 144.8894 | 3.4506 | Up | 0         | 0         |
| Unigene94086  | Potri.013G077900.3 | 5.3574    | 0.4901   | 3.4504 | Up | 7.16E-21  | 3.28E-20  |
| Unigene41108  | Potri.002G219200.1 | 21.6681   | 1.9853   | 3.4481 | Up | 4.90E-64  | 6.26E-63  |
| Unigene72665  | Potri.016G056200.5 | 8.4283    | 0.7728   | 3.4471 | Up | 6.54E-10  | 1.86E-09  |
| Unigene93610  | Potri.010G187700.4 | 20.2167   | 1.8537   | 3.4471 | Up | 8.06E-62  | 9.89E-61  |
| Unigene54065  | Potri.008G083400.1 | 5.4107    | 0.4961   | 3.4471 | Up | 6.54E-10  | 1.86E-09  |
| Unigene70408  | Potri.016G139200.1 | 5.2342    | 0.4803   | 3.446  | Up | 1.33E-59  | 1.56E-58  |
| Unigene80448  | Potri.016G055300.2 | 45.8724   | 4.213    | 3.4447 | Up | 2.18E-57  | 2.47E-56  |
| Unigene66669  | Potri.012G126100.3 | 7.1629    | 0.6588   | 3.4426 | Up | 2.11E-16  | 8.18E-16  |
| Unigene9306   | Potri.001G007000.1 | 131.8221  | 12.1536  | 3.4391 | Up | 3.92E-266 | 2.94E-264 |
| Unigene86401  | Potri.007G097900.3 | 4.3372    | 0.4005   | 3.4369 | Up | 1.21E-07  | 2.98E-07  |
| Unigene55928  | Potri.001G351400.1 | 4.7996    | 0.4432   | 3.4369 | Up | 4.67E-27  | 2.60E-26  |
| Unigene62240  | Potri.009G101200.1 | 4.1248    | 0.3809   | 3.4368 | Up | 3.68E-14  | 1.29E-13  |
| Unigene84460  | Potri.008G200500.1 | 4.6792    | 0.4321   | 3.4368 | Up | 1.21E-07  | 2.98E-07  |
| Unigene80196  | Potri.006G052800.3 | 10.5707   | 0.9762   | 3.4368 | Up | 3.68E-14  | 1.29E-13  |
| Unigene92798  | Potri.002G253600.3 | 5.16      | 0.4765   | 3.4368 | Up | 3.68E-14  | 1.29E-13  |
| Unigene67133  | Potri.002G083000.1 | 19.8704   | 1.8349   | 3.4368 | Up | 1.68E-65  | 2.20E-64  |
| Unigene39284  | Potri.001G117400.3 | 18.9753   | 1.7537   | 3.4356 | Up | 4.47E-76  | 6.91E-75  |
| Unigene63231  | Potri.004G224400.3 | 33.5364   | 3.1003   | 3.4352 | Up | 3.34E-112 | 8.27E-111 |
| Unigene108897 | Potri.003G202400.1 | 856.6463  | 79.2223  | 3.4347 | Up | 0         | 0         |
| Unigene17760  | Potri.015G013600.1 | 11.3733   | 1.054    | 3.4317 | Up | 1.88E-35  | 1.32E-34  |
| Unigene90537  | Potri.007G075400.1 | 5.6046    | 0.5205   | 3.4286 | Up | 6.48E-12  | 2.05E-11  |
| Unigene9626   | Potri.017G028600.1 | 5.2067    | 0.4836   | 3.4285 | Up | 1.33E-22  | 6.46E-22  |
| Unigene93354  | Potri.014G049400.2 | 3.8222    | 0.355    | 3.4285 | Up | 6.48E-12  | 2.05E-11  |
| Unigene14732  | Potri.011G144800.1 | 16.9433   | 1.5759   | 3.4265 | Up | 8.31E-27  | 4.60E-26  |
| Unigene47199  | Potri.008G147000.2 | 36.7705   | 3.42     | 3.4265 | Up | 3.32E-52  | 3.39E-51  |
| Unigene34646  | Potri.006G069500.2 | 54.6926   | 5.0908   | 3.4254 | Up | 1.39E-199 | 7.25E-198 |
| Unigene12736  | Potri.005G121100.1 | 14.0089   | 1.3043   | 3.425  | Up | 8.41E-46  | 7.52E-45  |
| Unigene69252  | Potri.004G111300.1 | 4.4365    | 0.4131   | 3.4249 | Up | 3.76E-16  | 1.44E-15  |
| Unigene107022 | Potri.005G160200.1 | 93.8643   | 8.7587   | 3.4218 | Up | 0         | 0         |
| Unigene88505  | Potri.010G164600.1 | 14.1828   | 1.3235   | 3.4217 | Up | 1.40E-24  | 7.23E-24  |
| Unigene93361  | Potri.016G089900.1 | 11.3806   | 1.0631   | 3.4202 | Up | 5.58E-33  | 3.68E-32  |
| Unigene14460  | Potri.009G041600.1 | 34.3235   | 3.2063   | 3.4202 | Up | 1.67E-64  | 2.15E-63  |
| Unigene92147  | Potri.006G224000.2 | 108.8854  | 10.1779  | 3.4193 | Up | 1.82E-244 | 1.22E-242 |
| Unigene45901  | Potri.008G035600.7 | 5.4817    | 0.5135   | 3.4162 | Up | 1.17E-09  | 3.26E-09  |

|               |                    |          |         |        |    |           |           |
|---------------|--------------------|----------|---------|--------|----|-----------|-----------|
| Unigene74214  | Potri.014G135800.2 | 3.9902   | 0.3738  | 3.4161 | Up | 2.35E-05  | 4.80E-05  |
| Unigene91725  | Potri.001G138500.1 | 5.9029   | 0.553   | 3.4161 | Up | 6.54E-14  | 2.27E-13  |
| Unigene70432  | Potri.016G047300.1 | 12.8683  | 1.2056  | 3.416  | Up | 6.54E-14  | 2.27E-13  |
| Unigene90188  | Potri.012G099600.1 | 6.8631   | 0.643   | 3.416  | Up | 6.54E-14  | 2.27E-13  |
| Unigene75123  | Potri.011G023200.1 | 3.9173   | 0.367   | 3.416  | Up | 2.35E-05  | 4.80E-05  |
| Unigene81621  | Potri.005G237500.5 | 3.3643   | 0.3152  | 3.416  | Up | 2.35E-05  | 4.80E-05  |
| Unigene69467  | Potri.004G048600.1 | 3.5159   | 0.3294  | 3.416  | Up | 6.54E-14  | 2.27E-13  |
| Unigene93008  | Potri.003G120900.3 | 3.2682   | 0.3062  | 3.416  | Up | 1.17E-09  | 3.26E-09  |
| Unigene100268 | Potri.001G138500.1 | 6.4503   | 0.6043  | 3.416  | Up | 1.17E-09  | 3.26E-09  |
| Unigene84456  | Potri.014G054400.2 | 3.0749   | 0.2881  | 3.4159 | Up | 2.35E-05  | 4.80E-05  |
| Unigene91212  | Potri.011G082900.1 | 4.1848   | 0.3921  | 3.4159 | Up | 1.17E-09  | 3.26E-09  |
| Unigene79064  | Potri.011G023100.3 | 3.5745   | 0.3349  | 3.4159 | Up | 2.35E-05  | 4.80E-05  |
| Unigene83520  | Potri.010G216100.3 | 3.1774   | 0.2977  | 3.4159 | Up | 2.35E-05  | 4.80E-05  |
| Unigene106296 | Potri.004G224400.3 | 92.9891  | 8.731   | 3.4128 | Up | 5.77E-164 | 2.33E-162 |
| Unigene23739  | Potri.018G033300.1 | 21.2368  | 1.9968  | 3.4108 | Up | 1.86E-51  | 1.87E-50  |
| Unigene91873  | Potri.004G158300.4 | 10.6089  | 0.9978  | 3.4104 | Up | 2.49E-24  | 1.28E-23  |
| Unigene27426  | Potri.005G025700.1 | 11.6108  | 1.0945  | 3.4071 | Up | 6.69E-16  | 2.53E-15  |
| Unigene19905  | Potri.007G086000.2 | 39.308   | 3.7094  | 3.4056 | Up | 3.30E-51  | 3.30E-50  |
| Unigene8189   | Potri.001G471600.1 | 57.4196  | 5.4192  | 3.4054 | Up | 5.69E-136 | 1.79E-134 |
| Unigene68920  | Potri.010G140900.1 | 3.3481   | 0.3164  | 3.4035 | Up | 1.15E-11  | 3.60E-11  |
| Unigene83852  | Potri.009G098100.1 | 7.7878   | 0.736   | 3.4034 | Up | 1.15E-11  | 3.60E-11  |
| Unigene94322  | Potri.005G093000.1 | 4.8047   | 0.4541  | 3.4034 | Up | 4.21E-22  | 2.01E-21  |
| Unigene33046  | Potri.003G068900.1 | 38.1738  | 3.6104  | 3.4024 | Up | 8.06E-144 | 2.72E-142 |
| Unigene65705  | Potri.009G079000.1 | 9.6062   | 0.9094  | 3.401  | Up | 8.36E-45  | 7.30E-44  |
| Unigene67806  | Potri.013G068000.1 | 7.0275   | 0.6656  | 3.4003 | Up | 6.89E-18  | 2.84E-17  |
| Unigene62626  | Potri.001G112500.1 | 5.6196   | 0.5323  | 3.4002 | Up | 6.89E-18  | 2.84E-17  |
| Unigene8360   | Potri.010G094300.1 | 11.0251  | 1.0467  | 3.3969 | Up | 9.65E-49  | 9.18E-48  |
| Unigene1204   | Potri.018G072700.6 | 90.1774  | 8.5648  | 3.3963 | Up | 0         | 0         |
| Unigene65838  | Potri.014G171600.1 | 7.3094   | 0.6948  | 3.3951 | Up | 1.16E-13  | 4.00E-13  |
| Unigene115681 | Potri.002G248300.2 | 832.6872 | 79.1486 | 3.3951 | Up | 0         | 0         |
| Unigene84639  | Potri.007G055500.1 | 31.7046  | 3.0139  | 3.395  | Up | 1.48E-44  | 1.29E-43  |
| Unigene90611  | Potri.005G237500.1 | 3.2685   | 0.3107  | 3.395  | Up | 2.16E-07  | 5.22E-07  |
| Unigene56998  | Potri.002G247900.2 | 9.5558   | 0.9084  | 3.395  | Up | 1.48E-44  | 1.29E-43  |
| Unigene62851  | Potri.006G044800.1 | 3.4555   | 0.3285  | 3.3949 | Up | 1.16E-13  | 4.00E-13  |
| Unigene7321   | Potri.001G372500.1 | 15.7443  | 1.4983  | 3.3934 | Up | 7.91E-59  | 9.21E-58  |
| Unigene34460  | Potri.010G222800.2 | 14.0143  | 1.3356  | 3.3913 | Up | 1.93E-95  | 3.88E-94  |
| Unigene63608  | Potri.004G129900.1 | 6.697    | 0.6393  | 3.3889 | Up | 1.19E-15  | 4.45E-15  |
| Unigene10208  | Potri.008G159000.3 | 44.2774  | 4.2372  | 3.3854 | Up | 1.77E-64  | 2.28E-63  |

|               |                    |          |         |        |    |           |           |
|---------------|--------------------|----------|---------|--------|----|-----------|-----------|
| Unigene43393  | Potri.001G074600.1 | 48.7058  | 4.6626  | 3.3849 | Up | 1.12E-240 | 7.31E-239 |
| Unigene84082  | Potri.008G133500.3 | 12.2071  | 1.169   | 3.3844 | Up | 1.22E-17  | 4.98E-17  |
| Unigene67383  | Potri.002G248200.2 | 4.4171   | 0.423   | 3.3844 | Up | 2.08E-09  | 5.72E-09  |
| Unigene87519  | Potri.T060000.2    | 5.2949   | 0.5071  | 3.3843 | Up | 2.08E-09  | 5.72E-09  |
| Unigene85305  | Potri.006G072900.3 | 5.8484   | 0.5601  | 3.3843 | Up | 2.08E-09  | 5.72E-09  |
| Unigene66210  | Potri.014G142500.1 | 6.6606   | 0.6379  | 3.3842 | Up | 2.08E-09  | 5.72E-09  |
| Unigene93267  | Potri.010G238400.2 | 3.0352   | 0.2907  | 3.3842 | Up | 2.08E-09  | 5.72E-09  |
| Unigene89695  | Potri.003G138000.1 | 4.6495   | 0.4453  | 3.3842 | Up | 2.08E-09  | 5.72E-09  |
| Unigene112199 | Potri.004G041600.1 | 258.4548 | 24.7809 | 3.3826 | Up | 9.00E-301 | 8.00E-299 |
| Unigene91047  | Potri.006G249200.1 | 9.348    | 0.8974  | 3.3808 | Up | 1.27E-19  | 5.58E-19  |
| Unigene30535  | Potri.010G142600.4 | 16.5263  | 1.5915  | 3.3763 | Up | 1.05E-33  | 7.01E-33  |
| Unigene114058 | Potri.008G066000.1 | 492.8062 | 47.4916 | 3.3753 | Up | 0         | 0         |
| Unigene34378  | Potri.005G086100.1 | 11.6477  | 1.1243  | 3.3729 | Up | 9.83E-64  | 1.25E-62  |
| Unigene35978  | Potri.009G059100.1 | 15.6839  | 1.5164  | 3.3706 | Up | 1.64E-29  | 9.82E-29  |
| Unigene70269  | Potri.008G051900.1 | 9.3549   | 0.9045  | 3.3705 | Up | 1.64E-29  | 9.82E-29  |
| Unigene69612  | Potri.004G205200.6 | 4.9866   | 0.4835  | 3.3665 | Up | 2.25E-19  | 9.80E-19  |
| Unigene37797  | Potri.018G030700.4 | 12.7738  | 1.2386  | 3.3664 | Up | 2.25E-19  | 9.80E-19  |
| Unigene17940  | Potri.005G127900.3 | 182.7127 | 17.72   | 3.3661 | Up | 0         | 0         |
| Unigene62725  | Potri.016G050500.1 | 8.0398   | 0.781   | 3.3638 | Up | 2.47E-23  | 1.22E-22  |
| Unigene47125  | Potri.013G125000.1 | 32.0317  | 3.1123  | 3.3634 | Up | 3.90E-69  | 5.41E-68  |
| Unigene92239  | Potri.002G089900.2 | 16.9177  | 1.6491  | 3.3588 | Up | 3.99E-39  | 3.07E-38  |
| Unigene118027 | Potri.004G086900.1 | 160.3602 | 15.6331 | 3.3586 | Up | 0         | 0         |
| Unigene2529   | Potri.013G010800.3 | 217.9719 | 21.2666 | 3.3575 | Up | 0         | 0         |
| Unigene37839  | Potri.007G072500.1 | 3.1083   | 0.3044  | 3.3521 | Up | 4.20E-05  | 8.38E-05  |
| Unigene93818  | Potri.010G152700.1 | 3.1561   | 0.3091  | 3.352  | Up | 3.64E-11  | 1.11E-10  |
| Unigene72315  | Potri.001G254600.3 | 5.9752   | 0.5852  | 3.352  | Up | 3.84E-07  | 9.12E-07  |
| Unigene79433  | Potri.001G235400.1 | 10.1726  | 0.9963  | 3.352  | Up | 3.67E-13  | 1.23E-12  |
| Unigene92825  | Potri.015G007700.1 | 6.4486   | 0.6316  | 3.3519 | Up | 3.85E-17  | 1.54E-16  |
| Unigene93517  | Potri.014G129700.2 | 3.4653   | 0.3394  | 3.3519 | Up | 3.64E-11  | 1.11E-10  |
| Unigene83784  | Potri.014G002800.1 | 3.0058   | 0.2944  | 3.3519 | Up | 4.20E-05  | 8.38E-05  |
| Unigene85980  | Potri.008G029300.1 | 4.1584   | 0.4073  | 3.3519 | Up | 3.84E-07  | 9.12E-07  |
| Unigene93560  | Potri.003G134300.3 | 6.1647   | 0.6038  | 3.3519 | Up | 3.99E-19  | 1.72E-18  |
| Unigene75061  | Potri.001G212000.3 | 3.747    | 0.367   | 3.3519 | Up | 4.20E-05  | 8.38E-05  |
| Unigene88682  | Potri.016G038500.3 | 3.6417   | 0.3567  | 3.3518 | Up | 3.84E-07  | 9.12E-07  |
| Unigene71989  | Potri.011G066000.1 | 4.0029   | 0.3921  | 3.3518 | Up | 4.20E-05  | 8.38E-05  |
| Unigene92612  | Potri.010G170300.3 | 5.024    | 0.4921  | 3.3518 | Up | 3.67E-13  | 1.23E-12  |
| Unigene64156  | Potri.009G043100.4 | 4.827    | 0.4728  | 3.3518 | Up | 3.84E-07  | 9.12E-07  |
| Unigene64568  | Potri.008G107300.1 | 3.7642   | 0.3687  | 3.3518 | Up | 3.84E-07  | 9.12E-07  |

|               |                    |          |         |        |    |           |           |
|---------------|--------------------|----------|---------|--------|----|-----------|-----------|
| Unigene80557  | Potri.004G135200.3 | 3.2955   | 0.3228  | 3.3518 | Up | 4.20E-05  | 8.38E-05  |
| Unigene75479  | Potri.003G145200.1 | 3.7131   | 0.3637  | 3.3518 | Up | 4.20E-05  | 8.38E-05  |
| Unigene86308  | Potri.014G029000.3 | 20.3904  | 2.0093  | 3.3431 | Up | 9.66E-31  | 5.99E-30  |
| Unigene89310  | Potri.005G248100.1 | 13.8814  | 1.37    | 3.3409 | Up | 8.14E-25  | 4.23E-24  |
| Unigene18818  | Potri.008G101600.1 | 10.1495  | 1.0024  | 3.3399 | Up | 7.73E-23  | 3.77E-22  |
| Unigene88393  | Potri.018G131500.1 | 24.4919  | 2.4208  | 3.3387 | Up | 2.37E-40  | 1.87E-39  |
| Unigene47688  | Potri.002G102500.1 | 14.3663  | 1.42    | 3.3387 | Up | 7.38E-21  | 3.38E-20  |
| Unigene23442  | Potri.006G134400.5 | 214.2444 | 21.192  | 3.3377 | Up | 0         | 0         |
| Unigene93279  | Potri.014G147200.2 | 5.847    | 0.5792  | 3.3356 | Up | 6.82E-17  | 2.69E-16  |
| Unigene94038  | Potri.002G100500.1 | 4.5133   | 0.4471  | 3.3355 | Up | 6.82E-17  | 2.69E-16  |
| Unigene55601  | Potri.001G049900.3 | 5.9872   | 0.5931  | 3.3355 | Up | 6.82E-17  | 2.69E-16  |
| Unigene16145  | Potri.010G062700.1 | 5.1346   | 0.5087  | 3.3354 | Up | 6.82E-17  | 2.69E-16  |
| Unigene73388  | Potri.005G071000.3 | 15.3794  | 1.5236  | 3.3354 | Up | 6.82E-17  | 2.69E-16  |
| Unigene93128  | Potri.002G188800.1 | 6.0542   | 0.5998  | 3.3354 | Up | 6.82E-17  | 2.69E-16  |
| Unigene38324  | Potri.017G056800.1 | 24.0592  | 2.3867  | 3.3335 | Up | 1.36E-84  | 2.38E-83  |
| Unigene26899  | Potri.001G172100.2 | 113.4048 | 11.2633 | 3.3318 | Up | 8.57E-229 | 5.23E-227 |
| Unigene93096  | Potri.002G061200.4 | 4.5402   | 0.4515  | 3.33   | Up | 6.50E-13  | 2.16E-12  |
| Unigene91262  | Potri.015G131200.1 | 5.8846   | 0.5852  | 3.3299 | Up | 6.50E-13  | 2.16E-12  |
| Unigene64361  | Potri.011G121000.2 | 8.359    | 0.8325  | 3.3278 | Up | 1.37E-22  | 6.62E-22  |
| Unigene34433  | Potri.005G071000.3 | 61.9839  | 6.1778  | 3.3267 | Up | 8.36E-203 | 4.42E-201 |
| Unigene104226 | Potri.003G202500.1 | 549.8496 | 54.8253 | 3.3261 | Up | 0         | 0         |
| Unigene61104  | Potri.013G101800.1 | 4.1274   | 0.4117  | 3.3256 | Up | 6.46E-11  | 1.94E-10  |
| Unigene80954  | Potri.015G028300.2 | 8.0246   | 0.8005  | 3.3255 | Up | 6.46E-11  | 1.94E-10  |
| Unigene92427  | Potri.014G083300.3 | 8.4629   | 0.8442  | 3.3255 | Up | 1.31E-20  | 5.93E-20  |
| Unigene70259  | Potri.009G122300.4 | 3.1669   | 0.3159  | 3.3255 | Up | 6.46E-11  | 1.94E-10  |
| Unigene6359   | Potri.014G118100.6 | 3.8884   | 0.3879  | 3.3254 | Up | 1.31E-20  | 5.93E-20  |
| Unigene67126  | Potri.013G133100.1 | 4.9488   | 0.4937  | 3.3254 | Up | 3.02E-30  | 1.84E-29  |
| Unigene94720  | Potri.001G286700.1 | 276.3177 | 27.571  | 3.3251 | Up | 3.24E-294 | 2.80E-292 |
| Unigene52896  | Potri.003G038000.1 | 36.5803  | 3.6532  | 3.3238 | Up | 1.07E-64  | 1.39E-63  |
| Unigene9003   | Potri.008G029300.2 | 62.8222  | 6.2851  | 3.3213 | Up | 1.80E-306 | 1.64E-304 |
| Unigene66362  | Potri.014G091400.3 | 3.6871   | 0.3695  | 3.3188 | Up | 6.55E-09  | 1.75E-08  |
| Unigene65733  | Potri.001G067500.1 | 3.9215   | 0.393   | 3.3188 | Up | 6.55E-09  | 1.75E-08  |
| Unigene87997  | Potri.006G027100.1 | 4.9199   | 0.4931  | 3.3187 | Up | 6.55E-09  | 1.75E-08  |
| Unigene66253  | Potri.001G138500.2 | 5.5826   | 0.5602  | 3.3169 | Up | 1.22E-37  | 9.05E-37  |
| Unigene47351  | Potri.002G248300.2 | 82.5461  | 8.2856  | 3.3165 | Up | 1.67E-115 | 4.29E-114 |
| Unigene13117  | Potri.004G082200.3 | 35.7261  | 3.5897  | 3.315  | Up | 4.56E-138 | 1.47E-136 |
| Unigene61807  | Potri.011G098900.1 | 3.4579   | 0.3477  | 3.314  | Up | 1.17E-14  | 4.21E-14  |
| Unigene65599  | Potri.018G054800.1 | 3.5012   | 0.3521  | 3.3138 | Up | 1.17E-14  | 4.21E-14  |

|               |                    |          |         |        |    |           |           |
|---------------|--------------------|----------|---------|--------|----|-----------|-----------|
| Unigene93325  | Potri.016G056200.5 | 7.1015   | 0.715   | 3.3121 | Up | 2.31E-20  | 1.04E-19  |
| Unigene17582  | Potri.002G155300.1 | 57.0253  | 5.7476  | 3.3106 | Up | 4.55E-226 | 2.74E-224 |
| Unigene114131 | Potri.008G029300.1 | 51.0933  | 5.1558  | 3.3089 | Up | 1.13E-65  | 1.48E-64  |
| Unigene94111  | Potri.018G113100.8 | 4.7871   | 0.4835  | 3.3076 | Up | 2.21E-18  | 9.27E-18  |
| Unigene85579  | Potri.018G017800.1 | 4.1158   | 0.4157  | 3.3076 | Up | 6.82E-07  | 1.59E-06  |
| Unigene64606  | Potri.012G091200.2 | 3.6279   | 0.3664  | 3.3076 | Up | 6.82E-07  | 1.59E-06  |
| Unigene18231  | Potri.019G033000.1 | 11.4768  | 1.1592  | 3.3075 | Up | 9.42E-30  | 5.68E-29  |
| Unigene94262  | Potri.010G164500.1 | 5.2452   | 0.5313  | 3.3034 | Up | 4.27E-22  | 2.03E-21  |
| Unigene117520 | Potri.001G226400.2 | 262.3198 | 26.5705 | 3.3034 | Up | 0         | 0         |
| Unigene54190  | Potri.T092300.1    | 14.5768  | 1.4781  | 3.3019 | Up | 1.77E-31  | 1.12E-30  |
| Unigene84325  | Potri.018G021000.1 | 11.4457  | 1.1606  | 3.3019 | Up | 2.13E-16  | 8.26E-16  |
| Unigene13854  | Potri.003G190900.1 | 12.5257  | 1.271   | 3.3009 | Up | 3.51E-65  | 4.57E-64  |
| Unigene9451   | Potri.010G226000.2 | 17.7661  | 1.8038  | 3.3    | Up | 3.55E-35  | 2.47E-34  |
| Unigene10378  | Potri.013G130900.1 | 6.0943   | 0.6188  | 3.2999 | Up | 3.55E-35  | 2.47E-34  |
| Unigene91466  | Potri.014G055800.1 | 4.6845   | 0.4761  | 3.2986 | Up | 1.14E-10  | 3.39E-10  |
| Unigene52886  | Potri.001G348600.1 | 11.6116  | 1.1802  | 3.2985 | Up | 7.18E-39  | 5.48E-38  |
| Unigene3526   | Potri.009G065900.2 | 13.851   | 1.41    | 3.2962 | Up | 7.94E-24  | 4.00E-23  |
| Unigene4177   | Potri.007G099400.1 | 27.3284  | 2.7851  | 3.2946 | Up | 1.36E-40  | 1.08E-39  |
| Unigene94509  | Potri.007G022500.1 | 3.9319   | 0.4007  | 3.2946 | Up | 1.36E-40  | 1.08E-39  |
| Unigene31771  | Potri.006G262700.1 | 124.5122 | 12.6901 | 3.2945 | Up | 0         | 0         |
| Unigene80613  | Potri.014G090300.1 | 14.2308  | 1.4525  | 3.2924 | Up | 3.91E-18  | 1.62E-17  |
| Unigene51340  | Potri.018G140600.1 | 47.1639  | 4.8156  | 3.2919 | Up | 2.37E-55  | 2.58E-54  |
| Unigene13226  | Potri.014G089000.1 | 16.3282  | 1.6674  | 3.2917 | Up | 1.27E-38  | 9.61E-38  |
| Unigene94153  | Potri.001G252600.1 | 8.6709   | 0.8872  | 3.2889 | Up | 5.87E-33  | 3.87E-32  |
| Unigene8235   | Potri.003G202600.1 | 44.2042  | 4.5247  | 3.2883 | Up | 1.38E-110 | 3.37E-109 |
| Unigene59526  | Potri.009G060000.1 | 3.0011   | 0.3079  | 3.285  | Up | 7.48E-05  | 1.45E-04  |
| Unigene76375  | Potri.009G109300.1 | 3.4659   | 0.3556  | 3.2849 | Up | 7.48E-05  | 1.45E-04  |
| Unigene90466  | Potri.005G133300.1 | 6.1354   | 0.6295  | 3.2849 | Up | 2.04E-12  | 6.59E-12  |
| Unigene75771  | Potri.004G095900.3 | 3.5283   | 0.362   | 3.2849 | Up | 7.48E-05  | 1.45E-04  |
| Unigene76468  | Potri.003G178200.1 | 3.4659   | 0.3556  | 3.2849 | Up | 7.48E-05  | 1.45E-04  |
| Unigene69222  | Potri.001G335300.4 | 3.6861   | 0.3782  | 3.2849 | Up | 1.40E-23  | 7.00E-23  |
| Unigene83292  | Potri.011G041100.1 | 5.8455   | 0.5998  | 3.2848 | Up | 1.16E-08  | 3.05E-08  |
| Unigene92643  | Potri.010G091000.1 | 3.1841   | 0.3267  | 3.2848 | Up | 1.16E-08  | 3.05E-08  |
| Unigene71278  | Potri.009G138900.1 | 15.5107  | 1.5915  | 3.2848 | Up | 3.77E-16  | 1.44E-15  |
| Unigene36580  | Potri.003G210300.1 | 4.7376   | 0.4861  | 3.2848 | Up | 2.04E-12  | 6.59E-12  |
| Unigene73629  | Potri.003G109100.1 | 3.6948   | 0.3791  | 3.2848 | Up | 7.48E-05  | 1.45E-04  |
| Unigene102268 | Potri.002G132100.1 | 3.2502   | 0.3335  | 3.2848 | Up | 7.48E-05  | 1.45E-04  |
| Unigene83109  | Potri.002G098800.1 | 11.7347  | 1.2041  | 3.2848 | Up | 3.77E-16  | 1.44E-15  |



|               |                    |          |         |        |    |           |           |
|---------------|--------------------|----------|---------|--------|----|-----------|-----------|
| Unigene90608  | Potri.001G148800.1 | 4.0376   | 0.4143  | 3.2848 | Up | 1.16E-08  | 3.05E-08  |
| Unigene68787  | Potri.007G128900.1 | 5.934    | 0.6089  | 3.2847 | Up | 5.50E-31  | 3.43E-30  |
| Unigene45700  | Potri.015G071400.1 | 8.4772   | 0.8718  | 3.2815 | Up | 4.22E-40  | 3.32E-39  |
| Unigene38100  | Potri.002G010100.1 | 25.296   | 2.6038  | 3.2802 | Up | 1.40E-56  | 1.57E-55  |
| Unigene557    | Potri.002G012800.1 | 40.4926  | 4.1707  | 3.2793 | Up | 2.93E-252 | 2.04E-250 |
| Unigene115635 | Potri.012G134100.1 | 82.0844  | 8.4744  | 3.2759 | Up | 9.41E-115 | 2.40E-113 |
| Unigene50833  | Potri.002G029600.1 | 5.0053   | 0.5171  | 3.2749 | Up | 3.66E-14  | 1.29E-13  |
| Unigene42115  | Potri.005G190200.2 | 6.8295   | 0.7075  | 3.271  | Up | 3.53E-65  | 4.59E-64  |
| Unigene31439  | Potri.002G117700.1 | 24.5965  | 2.5493  | 3.2703 | Up | 1.40E-70  | 1.98E-69  |
| Unigene90990  | Potri.011G074200.1 | 27.0678  | 2.8059  | 3.27   | Up | 2.12E-52  | 2.17E-51  |
| Unigene112469 | Potri.005G199700.1 | 905.1664 | 93.9309 | 3.2685 | Up | 0         | 0         |
| Unigene57809  | Potri.013G087400.3 | 4.4803   | 0.4652  | 3.2677 | Up | 6.65E-16  | 2.52E-15  |
| Unigene93571  | Potri.014G134400.5 | 7.0751   | 0.7355  | 3.266  | Up | 2.35E-21  | 1.09E-20  |
| Unigene93383  | Potri.014G056700.4 | 16.9484  | 1.7625  | 3.2655 | Up | 9.57E-47  | 8.73E-46  |
| Unigene3172   | Potri.005G089900.1 | 26.8196  | 2.7923  | 3.2638 | Up | 1.42E-84  | 2.48E-83  |
| Unigene78403  | Potri.015G048200.2 | 4.8995   | 0.5108  | 3.2618 | Up | 1.21E-06  | 2.76E-06  |
| Unigene87376  | Potri.012G044500.1 | 3.6707   | 0.3827  | 3.2618 | Up | 1.21E-06  | 2.76E-06  |
| Unigene69941  | Potri.011G062600.1 | 4.5763   | 0.4771  | 3.2618 | Up | 1.22E-17  | 4.95E-17  |
| Unigene66412  | Potri.010G255300.4 | 3.6247   | 0.3779  | 3.2618 | Up | 1.21E-06  | 2.76E-06  |
| Unigene69656  | Potri.008G170200.1 | 6.3795   | 0.6651  | 3.2618 | Up | 4.35E-23  | 2.14E-22  |
| Unigene92259  | Potri.008G101500.2 | 4.9733   | 0.5185  | 3.2618 | Up | 3.59E-12  | 1.15E-11  |
| Unigene64075  | Potri.003G173700.1 | 4.1149   | 0.429   | 3.2618 | Up | 1.22E-17  | 4.95E-17  |
| Unigene16335  | Potri.006G204100.4 | 5.4996   | 0.5734  | 3.2617 | Up | 4.35E-23  | 2.14E-22  |
| Unigene67272  | Potri.004G072600.1 | 4.5884   | 0.4784  | 3.2617 | Up | 1.21E-06  | 2.76E-06  |
| Unigene4653   | Potri.002G086600.3 | 11.0385  | 1.1509  | 3.2617 | Up | 4.35E-23  | 2.14E-22  |
| Unigene54098  | Potri.001G342500.1 | 4.4904   | 0.4682  | 3.2616 | Up | 3.59E-12  | 1.15E-11  |
| Unigene92942  | Potri.001G166000.2 | 4.4558   | 0.4646  | 3.2616 | Up | 3.59E-12  | 1.15E-11  |
| Unigene86570  | Potri.001G044300.5 | 3.8161   | 0.3979  | 3.2616 | Up | 1.21E-06  | 2.76E-06  |
| Unigene98709  | Potri.003G103900.1 | 13.0929  | 1.3668  | 3.2599 | Up | 1.68E-46  | 1.53E-45  |
| Unigene114445 | Potri.012G046600.1 | 72.665   | 7.5905  | 3.259  | Up | 3.65E-93  | 7.12E-92  |
| Unigene68737  | Potri.014G174700.1 | 10.3481  | 1.0816  | 3.2581 | Up | 8.10E-25  | 4.21E-24  |
| Unigene48724  | Potri.009G072300.2 | 13.3398  | 1.3953  | 3.2571 | Up | 2.24E-19  | 9.73E-19  |
| Unigene24781  | Potri.019G033000.1 | 20.2684  | 2.123   | 3.2551 | Up | 1.51E-26  | 8.29E-26  |
| Unigene51704  | Potri.002G003100.3 | 39.1536  | 4.1125  | 3.2511 | Up | 5.95E-64  | 7.59E-63  |
| Unigene94192  | Potri.002G197400.1 | 3.8716   | 0.4069  | 3.2502 | Up | 1.17E-15  | 4.39E-15  |
| Unigene84768  | Potri.006G009100.6 | 5.423    | 0.57    | 3.2501 | Up | 2.05E-08  | 5.33E-08  |
| Unigene59929  | Potri.001G380800.1 | 4.0618   | 0.4269  | 3.2501 | Up | 1.17E-15  | 4.39E-15  |
| Unigene82657  | Potri.009G034000.1 | 5.8148   | 0.6112  | 3.25   | Up | 2.05E-08  | 5.33E-08  |

|               |                    |          |         |        |    |           |           |
|---------------|--------------------|----------|---------|--------|----|-----------|-----------|
| Unigene93111  | Potri.005G240700.1 | 5.7169   | 0.6009  | 3.25   | Up | 1.17E-15  | 4.39E-15  |
| Unigene86363  | Potri.002G102500.1 | 20.3227  | 2.1361  | 3.25   | Up | 5.30E-30  | 3.21E-29  |
| Unigene52088  | Potri.002G086600.3 | 19.0819  | 2.0057  | 3.25   | Up | 2.03E-51  | 2.04E-50  |
| Unigene30357  | Potri.001G006200.1 | 4.1898   | 0.4404  | 3.25   | Up | 2.05E-08  | 5.33E-08  |
| Unigene118748 | Potri.011G165400.1 | 387.5439 | 40.7688 | 3.2488 | Up | 0         | 0         |
| Unigene112314 | Potri.004G020500.1 | 503.9308 | 53.0245 | 3.2485 | Up | 0         | 0         |
| Unigene40783  | Potri.009G035000.5 | 30.4784  | 3.2078  | 3.2481 | Up | 2.67E-99  | 5.69E-98  |
| Unigene68481  | Potri.001G333200.1 | 7.692    | 0.8102  | 3.247  | Up | 1.05E-63  | 1.33E-62  |
| Unigene48004  | Potri.009G027500.1 | 11.4768  | 1.2096  | 3.2461 | Up | 2.14E-17  | 8.64E-17  |
| Unigene83739  | Potri.008G226200.2 | 12.616   | 1.3297  | 3.2461 | Up | 2.14E-17  | 8.64E-17  |
| Unigene54269  | Potri.015G023300.3 | 8.973    | 0.9478  | 3.2429 | Up | 3.57E-10  | 1.03E-09  |
| Unigene91893  | Potri.012G006100.2 | 14.5334  | 1.5386  | 3.2397 | Up | 1.75E-31  | 1.11E-30  |
| Unigene90724  | Potri.010G222800.2 | 16.4613  | 1.7427  | 3.2397 | Up | 1.75E-31  | 1.11E-30  |
| Unigene66152  | Potri.013G046400.2 | 7.1066   | 0.7524  | 3.2396 | Up | 1.75E-31  | 1.11E-30  |
| Unigene90663  | Potri.006G068200.1 | 5.834    | 0.6182  | 3.2383 | Up | 6.34E-12  | 2.00E-11  |
| Unigene81620  | Potri.004G201500.1 | 8.9226   | 0.9455  | 3.2383 | Up | 6.34E-12  | 2.00E-11  |
| Unigene56577  | Potri.T015400.1    | 6.2166   | 0.6588  | 3.2382 | Up | 6.34E-12  | 2.00E-11  |
| Unigene114738 | Potri.009G119700.1 | 286.7318 | 30.3946 | 3.2378 | Up | 0         | 0         |
| Unigene8675   | Potri.013G014700.3 | 12.7553  | 1.3534  | 3.2364 | Up | 2.51E-24  | 1.28E-23  |
| Unigene47524  | Potri.010G208300.1 | 29.9649  | 3.1801  | 3.2361 | Up | 1.56E-59  | 1.84E-58  |
| Unigene80712  | Potri.008G031800.1 | 12.0851  | 1.2859  | 3.2324 | Up | 2.06E-15  | 7.66E-15  |
| Unigene114598 | Potri.017G126200.1 | 254.5387 | 27.0845 | 3.2323 | Up | 0         | 0         |
| Unigene89167  | Potri.003G222700.1 | 8.6569   | 0.9212  | 3.2323 | Up | 2.06E-15  | 7.66E-15  |
| Unigene20102  | Potri.013G049900.1 | 52.2864  | 5.5712  | 3.2304 | Up | 5.05E-190 | 2.47E-188 |
| Unigene40563  | Potri.001G470700.1 | 10.8838  | 1.1604  | 3.2295 | Up | 1.09E-34  | 7.48E-34  |
| Unigene115771 | Potri.006G194400.1 | 355.3471 | 37.8928 | 3.2292 | Up | 0         | 0         |
| Unigene114837 | Potri.017G056800.1 | 212.2169 | 22.6314 | 3.2291 | Up | 2.46E-273 | 1.91E-271 |
| Unigene41154  | Potri.002G116000.1 | 6.1911   | 0.6604  | 3.2288 | Up | 2.05E-36  | 1.48E-35  |
| Unigene115098 | Potri.013G105300.4 | 419.4215 | 44.7452 | 3.2286 | Up | 0         | 0         |
| Unigene12814  | Potri.007G134000.1 | 32.3383  | 3.45    | 3.2286 | Up | 2.64E-125 | 7.47E-124 |
| Unigene93078  | Potri.015G004800.1 | 15.5648  | 1.6618  | 3.2275 | Up | 7.32E-40  | 5.72E-39  |
| Unigene70218  | Potri.010G208500.1 | 7.5221   | 0.8037  | 3.2264 | Up | 2.37E-22  | 1.14E-21  |
| Unigene5757   | Potri.012G006000.1 | 8.78     | 0.9392  | 3.2247 | Up | 8.22E-26  | 4.41E-25  |
| Unigene80054  | Potri.001G380800.2 | 25.9277  | 2.777   | 3.2229 | Up | 5.40E-31  | 3.37E-30  |
| Unigene21536  | Potri.010G004600.1 | 143.7027 | 15.4316 | 3.2191 | Up | 0         | 0         |
| Unigene41967  | Potri.010G199000.1 | 29.9393  | 3.2196  | 3.2171 | Up | 1.20E-94  | 2.38E-93  |
| Unigene27171  | Potri.015G140800.1 | 162.7445 | 17.5131 | 3.2161 | Up | 0         | 0         |
| Unigene105148 | Potri.001G118900.1 | 88.13    | 9.4871  | 3.2156 | Up | 4.52E-213 | 2.52E-211 |

|               |                     |          |         |        |    |           |           |
|---------------|---------------------|----------|---------|--------|----|-----------|-----------|
| Unigene63068  | Potri.018G139800.3  | 3.5637   | 0.3839  | 3.2146 | Up | 2.14E-06  | 4.79E-06  |
| Unigene88198  | Potri.016G052200.1  | 3.4012   | 0.3664  | 3.2146 | Up | 2.14E-06  | 4.79E-06  |
| Unigene77336  | Potri.007G013600.1  | 3.2434   | 0.3494  | 3.2146 | Up | 1.33E-04  | 2.52E-04  |
| Unigene103145 | Potri.T004400.1     | 5.0405   | 0.543   | 3.2145 | Up | 2.14E-06  | 4.79E-06  |
| Unigene61765  | Potri.019G083100.1  | 4.5075   | 0.4856  | 3.2145 | Up | 3.62E-08  | 9.25E-08  |
| Unigene57953  | Potri.018G112300.3  | 5.354    | 0.5768  | 3.2145 | Up | 2.14E-06  | 4.79E-06  |
| Unigene68923  | Potri.018G003700.11 | 6.5247   | 0.7029  | 3.2145 | Up | 1.12E-11  | 3.49E-11  |
| Unigene75368  | Potri.008G034600.1  | 3.3909   | 0.3653  | 3.2145 | Up | 1.33E-04  | 2.52E-04  |
| Unigene80081  | Potri.006G143900.1  | 3.0325   | 0.3267  | 3.2145 | Up | 1.33E-04  | 2.52E-04  |
| Unigene65074  | Potri.005G099800.1  | 3.6331   | 0.3914  | 3.2145 | Up | 2.14E-06  | 4.79E-06  |
| Unigene62838  | Potri.001G296400.1  | 4.0324   | 0.4344  | 3.2145 | Up | 1.12E-11  | 3.49E-11  |
| Unigene69589  | Potri.016G066700.1  | 3.2086   | 0.3457  | 3.2144 | Up | 3.62E-08  | 9.25E-08  |
| Unigene39281  | Potri.014G085200.1  | 8.1282   | 0.8757  | 3.2144 | Up | 6.63E-17  | 2.62E-16  |
| Unigene87951  | Potri.011G157300.2  | 4.5907   | 0.4946  | 3.2144 | Up | 3.62E-08  | 9.25E-08  |
| Unigene56850  | Potri.008G020100.2  | 6.5438   | 0.705   | 3.2144 | Up | 3.62E-08  | 9.25E-08  |
| Unigene48347  | Potri.007G122700.1  | 5.3797   | 0.5796  | 3.2144 | Up | 6.63E-17  | 2.62E-16  |
| Unigene35339  | Potri.018G066100.1  | 4.0383   | 0.4351  | 3.2143 | Up | 2.25E-20  | 1.01E-19  |
| Unigene74885  | Potri.006G128200.1  | 3.422    | 0.3687  | 3.2143 | Up | 1.33E-04  | 2.52E-04  |
| Unigene60856  | Potri.006G052800.10 | 5.2782   | 0.5687  | 3.2143 | Up | 2.14E-06  | 4.79E-06  |
| Unigene70494  | Potri.004G187700.1  | 3.73     | 0.4019  | 3.2143 | Up | 1.33E-04  | 2.52E-04  |
| Unigene64518  | Potri.004G075100.1  | 3.2605   | 0.3513  | 3.2143 | Up | 6.30E-10  | 1.79E-09  |
| Unigene78246  | Potri.006G081400.3  | 3.161    | 0.3406  | 3.2142 | Up | 1.33E-04  | 2.52E-04  |
| Unigene29020  | Potri.001G350900.1  | 16.6608  | 1.8012  | 3.2094 | Up | 3.48E-51  | 3.48E-50  |
| Unigene25907  | Potri.009G091600.1  | 92.893   | 10.0463 | 3.2089 | Up | 2.48E-225 | 1.49E-223 |
| Unigene117273 | Potri.013G139800.1  | 859.7916 | 93.1204 | 3.2068 | Up | 0         | 0         |
| Unigene29745  | Potri.010G238800.1  | 15.1605  | 1.642   | 3.2068 | Up | 5.89E-34  | 3.97E-33  |
| Unigene48061  | Potri.019G072300.4  | 16.4585  | 1.7837  | 3.2059 | Up | 1.61E-88  | 2.96E-87  |
| Unigene39591  | Potri.010G147000.1  | 46.0881  | 4.9952  | 3.2058 | Up | 9.53E-230 | 5.85E-228 |
| Unigene114588 | Potri.005G251400.1  | 39.4936  | 4.2845  | 3.2044 | Up | 6.11E-51  | 6.08E-50  |
| Unigene35619  | Potri.006G070800.3  | 22.3797  | 2.4298  | 3.2033 | Up | 1.36E-23  | 6.80E-23  |
| Unigene49272  | Potri.002G103900.2  | 10.0026  | 1.0867  | 3.2023 | Up | 4.02E-83  | 6.88E-82  |
| Unigene65704  | Potri.006G197900.4  | 4.5062   | 0.4896  | 3.2022 | Up | 7.31E-22  | 3.46E-21  |
| Unigene32529  | Potri.013G141100.1  | 7.3706   | 0.8021  | 3.1999 | Up | 2.26E-69  | 3.14E-68  |
| Unigene64580  | Potri.001G349400.3  | 9.6666   | 1.052   | 3.1999 | Up | 2.14E-18  | 8.98E-18  |
| Unigene24980  | Potri.008G018800.1  | 48.659   | 5.2971  | 3.1994 | Up | 1.07E-50  | 1.06E-49  |
| Unigene8687   | Potri.004G034100.2  | 24.3483  | 2.6511  | 3.1992 | Up | 1.03E-33  | 6.93E-33  |
| Unigene67828  | Potri.002G142700.1  | 8.6449   | 0.9418  | 3.1984 | Up | 1.17E-16  | 4.56E-16  |
| Unigene68899  | Potri.001G077600.4  | 6.003    | 0.654   | 3.1983 | Up | 1.17E-16  | 4.56E-16  |

|              |                    |          |         |        |    |           |           |
|--------------|--------------------|----------|---------|--------|----|-----------|-----------|
| Unigene67194 | Potri.003G095400.2 | 7.3409   | 0.8016  | 3.195  | Up | 8.31E-27  | 4.60E-26  |
| Unigene52347 | Potri.008G144400.3 | 9.2246   | 1.0082  | 3.1937 | Up | 3.52E-13  | 1.18E-12  |
| Unigene7242  | Potri.005G251400.1 | 48.2792  | 5.2853  | 3.1913 | Up | 2.00E-107 | 4.67E-106 |
| Unigene91491 | Potri.009G093300.1 | 26.8945  | 2.945   | 3.191  | Up | 1.19E-53  | 1.25E-52  |
| Unigene63136 | Potri.001G364100.3 | 3.8074   | 0.4171  | 3.1903 | Up | 1.96E-11  | 6.06E-11  |
| Unigene93402 | Potri.019G072300.1 | 7.7081   | 0.8445  | 3.1902 | Up | 1.28E-21  | 6.03E-21  |
| Unigene92876 | Potri.003G067500.1 | 4.2898   | 0.47    | 3.1902 | Up | 1.96E-11  | 6.06E-11  |
| Unigene30575 | Potri.002G082400.1 | 21.861   | 2.3951  | 3.1902 | Up | 9.62E-32  | 6.13E-31  |
| Unigene92689 | Potri.011G073900.1 | 3.6848   | 0.4051  | 3.1852 | Up | 1.11E-09  | 3.10E-09  |
| Unigene14540 | Potri.001G342100.1 | 4.8097   | 0.5288  | 3.1852 | Up | 1.11E-09  | 3.10E-09  |
| Unigene23612 | Potri.006G134400.5 | 153.6305 | 16.8969 | 3.1846 | Up | 0         | 0         |
| Unigene94091 | Potri.014G151200.2 | 14.315   | 1.5748  | 3.1843 | Up | 5.76E-50  | 5.62E-49  |
| Unigene62685 | Potri.006G188600.2 | 4.7953   | 0.5284  | 3.1819 | Up | 1.69E-31  | 1.07E-30  |
| Unigene339   | Potri.012G017600.1 | 91.0174  | 10.0375 | 3.1807 | Up | 0         | 0         |
| Unigene4367  | Potri.005G071000.1 | 18.2194  | 2.0093  | 3.1807 | Up | 4.18E-23  | 2.06E-22  |
| Unigene27705 | Potri.005G243000.2 | 53.445   | 5.904   | 3.1783 | Up | 9.29E-156 | 3.50E-154 |
| Unigene83861 | Potri.007G052200.3 | 5.3285   | 0.5888  | 3.1779 | Up | 6.37E-08  | 1.60E-07  |
| Unigene16951 | Potri.006G045300.2 | 30.7544  | 3.3983  | 3.1779 | Up | 6.51E-68  | 8.85E-67  |
| Unigene47531 | Potri.002G013200.1 | 110.8713 | 12.2599 | 3.1769 | Up | 7.58E-240 | 4.94E-238 |
| Unigene18253 | Potri.016G084800.1 | 11.0371  | 1.221   | 3.1762 | Up | 1.24E-39  | 9.62E-39  |
| Unigene15749 | Potri.015G083400.1 | 23.7945  | 2.6328  | 3.176  | Up | 5.56E-33  | 3.67E-32  |
| Unigene25369 | Potri.003G074400.1 | 195.6884 | 21.6679 | 3.1749 | Up | 0         | 0         |
| Unigene41833 | Potri.009G035000.1 | 36.0366  | 3.9913  | 3.1745 | Up | 2.66E-74  | 3.99E-73  |
| Unigene47630 | Potri.017G099900.1 | 25.044   | 2.7747  | 3.1741 | Up | 1.77E-49  | 1.71E-48  |
| Unigene602   | Potri.011G112400.1 | 53.1362  | 5.8931  | 3.1726 | Up | 1.20E-174 | 5.22E-173 |
| Unigene67149 | Potri.014G171900.1 | 3.7632   | 0.4174  | 3.1725 | Up | 6.19E-13  | 2.05E-12  |
| Unigene63798 | Potri.002G018900.1 | 7.0065   | 0.7771  | 3.1725 | Up | 6.19E-13  | 2.05E-12  |
| Unigene94204 | Potri.010G219100.1 | 3.1744   | 0.3521  | 3.1724 | Up | 6.19E-13  | 2.05E-12  |
| Unigene31110 | Potri.003G164700.1 | 6.7162   | 0.7453  | 3.1718 | Up | 4.10E-41  | 3.30E-40  |
| Unigene72166 | Potri.019G125000.3 | 10.5018  | 1.1704  | 3.1656 | Up | 3.45E-11  | 1.05E-10  |
| Unigene57001 | Potri.014G039100.1 | 7.1164   | 0.7931  | 3.1656 | Up | 3.59E-16  | 1.38E-15  |
| Unigene79567 | Potri.003G161200.1 | 4.4514   | 0.4961  | 3.1656 | Up | 3.77E-06  | 8.31E-06  |
| Unigene73998 | Potri.002G110500.1 | 5.0546   | 0.5633  | 3.1656 | Up | 3.77E-06  | 8.31E-06  |
| Unigene65256 | Potri.015G096200.1 | 5.002    | 0.5575  | 3.1655 | Up | 3.94E-21  | 1.82E-20  |
| Unigene91271 | Potri.013G014600.1 | 5.2382   | 0.5838  | 3.1655 | Up | 3.45E-11  | 1.05E-10  |
| Unigene64140 | Potri.013G009500.1 | 4.6826   | 0.5219  | 3.1655 | Up | 3.45E-11  | 1.05E-10  |
| Unigene68783 | Potri.007G005000.1 | 6.338    | 0.7064  | 3.1655 | Up | 3.59E-16  | 1.38E-15  |
| Unigene46882 | Potri.003G222300.2 | 5.3815   | 0.5998  | 3.1655 | Up | 3.94E-21  | 1.82E-20  |
| Unigene90119 | Potri.002G022800.2 | 5.7844   | 0.6447  | 3.1655 | Up | 3.45E-11  | 1.05E-10  |

|               |                    |          |         |        |    |           |           |
|---------------|--------------------|----------|---------|--------|----|-----------|-----------|
| Unigene65260  | Potri.005G174800.1 | 3.2003   | 0.3567  | 3.1654 | Up | 3.77E-06  | 8.31E-06  |
| Unigene90291  | Potri.004G129800.1 | 5.7232   | 0.6379  | 3.1654 | Up | 3.45E-11  | 1.05E-10  |
| Unigene93029  | Potri.001G002500.1 | 6.1459   | 0.685   | 3.1654 | Up | 3.59E-16  | 1.38E-15  |
| Unigene63788  | Potri.004G116700.2 | 3.0817   | 0.3435  | 3.1653 | Up | 3.77E-06  | 8.31E-06  |
| Unigene64774  | Potri.015G053300.1 | 7.8025   | 0.8714  | 3.1625 | Up | 2.75E-29  | 1.64E-28  |
| Unigene65792  | Potri.001G237700.1 | 5.1225   | 0.5723  | 3.162  | Up | 2.39E-24  | 1.23E-23  |
| Unigene108504 | Potri.017G016000.1 | 504.7992 | 56.4138 | 3.1616 | Up | 0         | 0         |
| Unigene16870  | Potri.004G197700.1 | 68.698   | 7.6772  | 3.1616 | Up | 3.20E-210 | 1.76E-208 |
| Unigene69368  | Potri.014G089300.1 | 6.8523   | 0.7661  | 3.161  | Up | 2.13E-19  | 9.27E-19  |
| Unigene52702  | Potri.002G131900.1 | 9.1759   | 1.0271  | 3.1593 | Up | 1.47E-27  | 8.29E-27  |
| Unigene27213  | Potri.011G165400.1 | 155.8173 | 17.4425 | 3.1592 | Up | 8.00E-296 | 6.95E-294 |
| Unigene52662  | Potri.004G034100.2 | 71.4609  | 8.0177  | 3.1559 | Up | 3.58E-136 | 1.13E-134 |
| Unigene116585 | Potri.002G203500.1 | 202.2695 | 22.6972 | 3.1557 | Up | 5.38E-298 | 4.73E-296 |
| Unigene59636  | Potri.019G083700.3 | 4.852    | 0.5445  | 3.1556 | Up | 1.95E-09  | 5.38E-09  |
| Unigene68517  | Potri.001G164700.5 | 11.8177  | 1.3262  | 3.1556 | Up | 1.15E-17  | 4.70E-17  |
| Unigene6021   | Potri.010G063600.1 | 4.4872   | 0.5036  | 3.1555 | Up | 1.15E-17  | 4.70E-17  |
| Unigene79034  | Potri.009G050000.1 | 7.4599   | 0.8372  | 3.1555 | Up | 1.95E-09  | 5.38E-09  |
| Unigene92605  | Potri.004G220400.1 | 7.3226   | 0.8218  | 3.1555 | Up | 1.15E-17  | 4.70E-17  |
| Unigene26430  | Potri.003G145100.1 | 153.1245 | 17.1845 | 3.1555 | Up | 3.38E-212 | 1.87E-210 |
| Unigene67134  | Potri.001G399400.7 | 3.2612   | 0.366   | 3.1555 | Up | 1.95E-09  | 5.38E-09  |
| Unigene115830 | Potri.017G090600.1 | 290.4392 | 32.684  | 3.1516 | Up | 0         | 0         |
| Unigene64980  | Potri.015G087400.1 | 6.1553   | 0.6928  | 3.1513 | Up | 4.19E-24  | 2.13E-23  |
| Unigene69582  | Potri.004G067400.1 | 3.4952   | 0.3934  | 3.1513 | Up | 1.08E-12  | 3.56E-12  |
| Unigene15415  | Potri.019G130700.1 | 63.1753  | 7.1177  | 3.1499 | Up | 2.68E-156 | 1.01E-154 |
| Unigene94223  | Potri.001G140200.5 | 7.0717   | 0.7967  | 3.1499 | Up | 2.56E-27  | 1.44E-26  |
| Unigene14333  | Potri.T013200.1    | 6.9282   | 0.7811  | 3.1489 | Up | 1.58E-30  | 9.74E-30  |
| Unigene28760  | Potri.004G059900.1 | 26.1097  | 2.9469  | 3.1473 | Up | 2.32E-72  | 3.38E-71  |
| Unigene33603  | Potri.001G203800.1 | 19.4848  | 2.1992  | 3.1473 | Up | 1.16E-54  | 1.24E-53  |
| Unigene92897  | Potri.014G090300.2 | 8.9809   | 1.0144  | 3.1462 | Up | 2.24E-22  | 1.08E-21  |
| Unigene49709  | Potri.003G096700.2 | 57.5165  | 6.5005  | 3.1454 | Up | 3.77E-125 | 1.07E-123 |
| Unigene26641  | Potri.001G295500.1 | 93.8287  | 10.6189 | 3.1434 | Up | 6.74E-165 | 2.75E-163 |
| Unigene64424  | Potri.007G106500.2 | 3.3909   | 0.3845  | 3.1406 | Up | 1.12E-07  | 2.77E-07  |
| Unigene65906  | Potri.006G216400.1 | 3.0813   | 0.3494  | 3.1406 | Up | 2.35E-04  | 4.33E-04  |
| Unigene92707  | Potri.T172400.1    | 5.7038   | 0.6468  | 3.1405 | Up | 3.44E-14  | 1.21E-13  |
| Unigene71155  | Potri.014G056700.5 | 7.0167   | 0.7957  | 3.1405 | Up | 1.12E-07  | 2.77E-07  |
| Unigene76429  | Potri.001G170300.5 | 3.1358   | 0.3556  | 3.1405 | Up | 2.35E-04  | 4.33E-04  |
| Unigene25612  | Potri.001G029700.1 | 13.1239  | 1.4883  | 3.1405 | Up | 7.32E-24  | 3.70E-23  |
| Unigene84294  | Potri.018G070500.1 | 5.1169   | 0.5803  | 3.1404 | Up | 1.12E-07  | 2.77E-07  |
| Unigene73391  | Potri.018G024500.2 | 3.3587   | 0.3809  | 3.1404 | Up | 2.35E-04  | 4.33E-04  |

|              |                    |          |         |        |    |           |           |
|--------------|--------------------|----------|---------|--------|----|-----------|-----------|
| Unigene72658 | Potri.012G046600.1 | 6.8143   | 0.7728  | 3.1404 | Up | 1.12E-07  | 2.77E-07  |
| Unigene89431 | Potri.006G229300.9 | 3.9926   | 0.4528  | 3.1404 | Up | 1.12E-07  | 2.77E-07  |
| Unigene26378 | Potri.004G176000.4 | 10.3308  | 1.1716  | 3.1404 | Up | 2.02E-17  | 8.15E-17  |
| Unigene76369 | Potri.001G065600.2 | 3.1497   | 0.3572  | 3.1404 | Up | 2.35E-04  | 4.33E-04  |
| Unigene88092 | Potri.006G000700.1 | 4.3345   | 0.4916  | 3.1403 | Up | 1.12E-07  | 2.77E-07  |
| Unigene32481 | Potri.013G048100.1 | 16.0247  | 1.8199  | 3.1384 | Up | 1.42E-60  | 1.71E-59  |
| Unigene45342 | Potri.005G215500.1 | 11.142   | 1.266   | 3.1377 | Up | 1.33E-87  | 2.41E-86  |
| Unigene15592 | Potri.015G065800.1 | 93.8735  | 10.6712 | 3.137  | Up | 3.69E-178 | 1.66E-176 |
| Unigene86306 | Potri.002G098800.1 | 20.0174  | 2.2772  | 3.1359 | Up | 1.47E-28  | 8.55E-28  |
| Unigene17441 | Potri.001G074600.1 | 34.7694  | 3.957   | 3.1353 | Up | 4.12E-73  | 6.07E-72  |
| Unigene48022 | Potri.015G093200.1 | 18.4994  | 2.1065  | 3.1346 | Up | 3.92E-22  | 1.87E-21  |
| Unigene33127 | Potri.002G231900.1 | 22.3258  | 2.5434  | 3.1339 | Up | 3.91E-57  | 4.41E-56  |
| Unigene51842 | Potri.006G092300.1 | 153.6614 | 17.5166 | 3.133  | Up | 3.32E-163 | 1.33E-161 |
| Unigene96984 | Potri.009G119700.1 | 168.0993 | 19.1719 | 3.1322 | Up | 1.16E-281 | 9.36E-280 |
| Unigene69240 | Potri.003G147800.1 | 7.5848   | 0.8652  | 3.132  | Up | 4.83E-30  | 2.93E-29  |
| Unigene59669 | Potri.003G115800.3 | 10.2604  | 1.1704  | 3.132  | Up | 1.10E-15  | 4.13E-15  |
| Unigene28236 | Potri.014G097100.2 | 16.0234  | 1.8292  | 3.1309 | Up | 3.23E-52  | 3.30E-51  |
| Unigene15840 | Potri.001G297300.1 | 19.0835  | 2.1806  | 3.1295 | Up | 1.28E-23  | 6.40E-23  |
| Unigene94428 | Potri.019G032900.1 | 4.6144   | 0.5273  | 3.1294 | Up | 1.28E-23  | 6.40E-23  |
| Unigene92568 | Potri.006G213400.5 | 8.6725   | 0.9922  | 3.1277 | Up | 2.11E-20  | 9.52E-20  |
| Unigene23255 | Potri.007G113000.1 | 16.213   | 1.8552  | 3.1275 | Up | 3.68E-85  | 6.47E-84  |
| Unigene65043 | Potri.011G010300.8 | 5.5128   | 0.6318  | 3.1252 | Up | 3.41E-09  | 9.29E-09  |
| Unigene87891 | Potri.010G249800.1 | 5.4107   | 0.6201  | 3.1252 | Up | 3.41E-09  | 9.29E-09  |
| Unigene48107 | Potri.001G139400.3 | 4.1641   | 0.4773  | 3.125  | Up | 3.41E-09  | 9.29E-09  |
| Unigene88090 | Potri.018G081900.1 | 36.387   | 4.1783  | 3.1224 | Up | 6.24E-55  | 6.72E-54  |
| Unigene94290 | Potri.001G190900.1 | 3.2834   | 0.3773  | 3.1214 | Up | 6.02E-14  | 2.10E-13  |
| Unigene91457 | Potri.005G070900.2 | 9.1039   | 1.0475  | 3.1195 | Up | 1.14E-18  | 4.82E-18  |
| Unigene9178  | Potri.003G101600.1 | 11.4721  | 1.3219  | 3.1174 | Up | 9.12E-33  | 5.98E-32  |
| Unigene32490 | Potri.012G017600.1 | 127.4858 | 14.7006 | 3.1164 | Up | 0         | 0         |
| Unigene56304 | Potri.T003800.1    | 3.9862   | 0.4601  | 3.115  | Up | 6.64E-06  | 1.43E-05  |
| Unigene92815 | Potri.004G144300.1 | 4.1118   | 0.4746  | 3.115  | Up | 1.06E-10  | 3.15E-10  |
| Unigene70048 | Potri.015G024400.1 | 4.0092   | 0.4628  | 3.1149 | Up | 1.06E-10  | 3.15E-10  |
| Unigene74354 | Potri.010G232200.2 | 4.8576   | 0.5607  | 3.1149 | Up | 6.64E-06  | 1.43E-05  |
| Unigene92060 | Potri.009G091600.1 | 9.222    | 1.0645  | 3.1149 | Up | 3.69E-20  | 1.65E-19  |
| Unigene87671 | Potri.006G213200.1 | 3.2739   | 0.3779  | 3.1149 | Up | 6.64E-06  | 1.43E-05  |
| Unigene73357 | Potri.014G097100.2 | 4.9497   | 0.5714  | 3.1148 | Up | 6.64E-06  | 1.43E-05  |
| Unigene86547 | Potri.014G027000.1 | 3.4468   | 0.3979  | 3.1148 | Up | 6.64E-06  | 1.43E-05  |
| Unigene82829 | Potri.013G013100.4 | 11.868   | 1.37    | 3.1148 | Up | 1.92E-15  | 7.14E-15  |
| Unigene65046 | Potri.009G041400.1 | 4.9032   | 0.566   | 3.1148 | Up | 6.64E-06  | 1.43E-05  |

|               |                    |          |         |        |    |           |           |
|---------------|--------------------|----------|---------|--------|----|-----------|-----------|
| Unigene80031  | Potri.006G129600.1 | 4.2628   | 0.4921  | 3.1148 | Up | 6.64E-06  | 1.43E-05  |
| Unigene66695  | Potri.002G088700.3 | 6.1435   | 0.7092  | 3.1148 | Up | 1.06E-10  | 3.15E-10  |
| Unigene2762   | Potri.008G149200.2 | 21.8671  | 2.5263  | 3.1137 | Up | 1.81E-68  | 2.49E-67  |
| Unigene51624  | Potri.018G072700.4 | 22.9915  | 2.6578  | 3.1128 | Up | 2.05E-40  | 1.63E-39  |
| Unigene92959  | Potri.006G073400.1 | 10.6672  | 1.2341  | 3.1117 | Up | 2.38E-26  | 1.30E-25  |
| Unigene46939  | Potri.001G278500.1 | 396.561  | 45.9259 | 3.1102 | Up | 0         | 0         |
| Unigene70363  | Potri.008G119600.1 | 4.3038   | 0.4986  | 3.1097 | Up | 6.17E-17  | 2.44E-16  |
| Unigene16274  | Potri.008G134000.1 | 98.9873  | 11.4699 | 3.1094 | Up | 1.05E-219 | 6.07E-218 |
| Unigene86687  | Potri.004G199600.3 | 7.9491   | 0.9223  | 3.1075 | Up | 3.32E-12  | 1.07E-11  |
| Unigene90884  | Potri.009G096300.1 | 20.8053  | 2.4232  | 3.102  | Up | 1.89E-38  | 1.43E-37  |
| Unigene90410  | Potri.018G055900.1 | 3.6223   | 0.4219  | 3.1019 | Up | 1.97E-07  | 4.77E-07  |
| Unigene84290  | Potri.002G050800.2 | 4.9823   | 0.5803  | 3.1019 | Up | 1.97E-07  | 4.77E-07  |
| Unigene90398  | Potri.001G353200.1 | 3.6223   | 0.4219  | 3.1019 | Up | 1.97E-07  | 4.77E-07  |
| Unigene14303  | Potri.003G052600.1 | 5.491    | 0.6396  | 3.1018 | Up | 1.89E-38  | 1.43E-37  |
| Unigene58798  | Potri.001G305300.1 | 3.0398   | 0.3541  | 3.1017 | Up | 1.97E-07  | 4.77E-07  |
| Unigene21489  | Potri.007G055700.1 | 29.6737  | 3.4593  | 3.1006 | Up | 1.24E-185 | 5.90E-184 |
| Unigene37870  | Potri.019G097500.1 | 191.4817 | 22.3444 | 3.0992 | Up | 0         | 0         |
| Unigene69787  | Potri.014G095000.1 | 4.0363   | 0.4715  | 3.0977 | Up | 3.35E-15  | 1.23E-14  |
| Unigene69424  | Potri.010G187700.4 | 6.8721   | 0.8028  | 3.0976 | Up | 4.47E-29  | 2.64E-28  |
| Unigene94098  | Potri.007G046400.1 | 6.4847   | 0.7582  | 3.0964 | Up | 6.79E-23  | 3.32E-22  |
| Unigene22850  | Potri.009G026200.5 | 8.6174   | 1.0086  | 3.0949 | Up | 9.68E-69  | 1.33E-67  |
| Unigene24489  | Potri.004G002500.1 | 19.0552  | 2.2325  | 3.0935 | Up | 1.08E-71  | 1.56E-70  |
| Unigene66256  | Potri.008G201400.5 | 8.1805   | 0.959   | 3.0926 | Up | 1.59E-33  | 1.06E-32  |
| Unigene109200 | Potri.001G218800.1 | 43.4286  | 5.0939  | 3.0918 | Up | 1.19E-42  | 9.93E-42  |
| Unigene66557  | Potri.010G227000.1 | 8.2434   | 0.9673  | 3.0912 | Up | 5.25E-35  | 3.63E-34  |
| Unigene68861  | Potri.016G089400.1 | 15.6922  | 1.8434  | 3.0896 | Up | 1.01E-54  | 1.09E-53  |
| Unigene48334  | Potri.015G098100.1 | 3.7164   | 0.4368  | 3.0889 | Up | 1.85E-10  | 5.42E-10  |
| Unigene62449  | Potri.012G088200.1 | 5.2334   | 0.6151  | 3.0889 | Up | 1.85E-10  | 5.42E-10  |
| Unigene116419 | Potri.001G007000.1 | 193.3008 | 22.7463 | 3.0871 | Up | 8.49E-274 | 6.61E-272 |
| Unigene109436 | Potri.008G080800.5 | 38.171   | 4.5068  | 3.0823 | Up | 9.96E-38  | 7.40E-37  |
| Unigene69174  | Potri.014G105600.1 | 3.5179   | 0.4154  | 3.0821 | Up | 1.84E-13  | 6.25E-13  |
| Unigene94334  | Potri.018G041400.1 | 6.7893   | 0.8028  | 3.0802 | Up | 1.36E-28  | 7.90E-28  |
| Unigene62565  | Potri.018G122600.1 | 6.204    | 0.7336  | 3.0801 | Up | 5.85E-15  | 2.13E-14  |
| Unigene69746  | Potri.007G015500.2 | 3.3722   | 0.3988  | 3.08   | Up | 5.85E-15  | 2.13E-14  |
| Unigene6065   | Potri.012G075800.1 | 194.5684 | 23.0301 | 3.0787 | Up | 0         | 0         |
| Unigene94066  | Potri.001G327900.1 | 4.6433   | 0.5497  | 3.0784 | Up | 1.88E-16  | 7.28E-16  |
| Unigene34016  | Potri.019G130700.1 | 27.6293  | 3.2744  | 3.0769 | Up | 1.54E-67  | 2.08E-66  |
| Unigene70164  | Potri.017G071200.1 | 7.051    | 0.8356  | 3.0769 | Up | 6.04E-18  | 2.49E-17  |
| Unigene103848 | Potri.003G095500.2 | 93.0374  | 11.0259 | 3.0769 | Up | 8.80E-183 | 4.10E-181 |

|               |                    |          |         |        |    |           |           |
|---------------|--------------------|----------|---------|--------|----|-----------|-----------|
| Unigene6019   | Potri.016G069700.3 | 6.9977   | 0.83    | 3.0757 | Up | 1.95E-19  | 8.52E-19  |
| Unigene48499  | Potri.008G173500.1 | 19.6408  | 2.3296  | 3.0757 | Up | 1.95E-19  | 8.52E-19  |
| Unigene35307  | Potri.011G112400.1 | 12.3633  | 1.4674  | 3.0747 | Up | 6.34E-21  | 2.91E-20  |
| Unigene92619  | Potri.001G072800.1 | 8.964    | 1.064   | 3.0746 | Up | 6.34E-21  | 2.91E-20  |
| Unigene82236  | Potri.003G148200.1 | 19.5105  | 2.3184  | 3.073  | Up | 6.72E-24  | 3.40E-23  |
| Unigene59816  | Potri.006G262800.1 | 6.6118   | 0.786   | 3.0724 | Up | 2.20E-25  | 1.16E-24  |
| Unigene29816  | Potri.005G045200.2 | 11.7145  | 1.3937  | 3.0713 | Up | 2.36E-28  | 1.36E-27  |
| Unigene23102  | Potri.003G095600.1 | 230.1924 | 27.3897 | 3.0711 | Up | 0         | 0         |
| Unigene109550 | Potri.005G220100.1 | 40.7693  | 4.8596  | 3.0686 | Up | 3.29E-40  | 2.59E-39  |
| Unigene112070 | Potri.007G043800.2 | 330.7019 | 39.5126 | 3.0651 | Up | 0         | 0         |
| Unigene12030  | Potri.009G091600.1 | 77.3424  | 9.2478  | 3.0641 | Up | 3.47E-288 | 2.93E-286 |
| Unigene60387  | Potri.010G131000.1 | 3.2592   | 0.3901  | 3.0626 | Up | 4.14E-04  | 7.40E-04  |
| Unigene64355  | Potri.T042200.1    | 3.8438   | 0.4601  | 3.0625 | Up | 1.16E-05  | 2.45E-05  |
| Unigene75902  | Potri.014G122600.1 | 6.0215   | 0.7208  | 3.0625 | Up | 3.44E-07  | 8.20E-07  |
| Unigene65690  | Potri.013G065700.1 | 4.466    | 0.5346  | 3.0625 | Up | 3.23E-10  | 9.33E-10  |
| Unigene26737  | Potri.008G123300.1 | 4.4819   | 0.5365  | 3.0625 | Up | 3.27E-16  | 1.25E-15  |
| Unigene97836  | Potri.008G109900.4 | 4.8186   | 0.5768  | 3.0625 | Up | 1.16E-05  | 2.45E-05  |
| Unigene93177  | Potri.T138600.1    | 4.3356   | 0.519   | 3.0624 | Up | 1.01E-11  | 3.17E-11  |
| Unigene61796  | Potri.017G085400.4 | 4.7281   | 0.566   | 3.0624 | Up | 1.04E-08  | 2.76E-08  |
| Unigene48473  | Potri.016G019100.1 | 9.4562   | 1.132   | 3.0624 | Up | 3.27E-16  | 1.25E-15  |
| Unigene91658  | Potri.011G164100.3 | 3.1083   | 0.3721  | 3.0624 | Up | 3.44E-07  | 8.20E-07  |
| Unigene70102  | Potri.011G150700.2 | 3.689    | 0.4416  | 3.0624 | Up | 3.23E-10  | 9.33E-10  |
| Unigene6275   | Potri.008G046900.4 | 4.5986   | 0.5505  | 3.0624 | Up | 1.16E-05  | 2.45E-05  |
| Unigene65668  | Potri.006G062900.5 | 11.7212  | 1.4031  | 3.0624 | Up | 1.73E-38  | 1.31E-37  |
| Unigene72632  | Potri.005G021400.3 | 3.2278   | 0.3864  | 3.0624 | Up | 4.14E-04  | 7.40E-04  |
| Unigene60478  | Potri.004G052400.2 | 3.187    | 0.3815  | 3.0624 | Up | 1.16E-05  | 2.45E-05  |
| Unigene65868  | Potri.003G180800.2 | 3.9964   | 0.4784  | 3.0624 | Up | 3.44E-07  | 8.20E-07  |
| Unigene90477  | Potri.003G122700.3 | 3.4968   | 0.4186  | 3.0624 | Up | 3.44E-07  | 8.20E-07  |
| Unigene81147  | Potri.012G027900.1 | 5.3285   | 0.6379  | 3.0623 | Up | 3.44E-07  | 8.20E-07  |
| Unigene92056  | Potri.002G157500.3 | 4.4463   | 0.5323  | 3.0623 | Up | 3.23E-10  | 9.33E-10  |
| Unigene117914 | Potri.013G101600.1 | 342.9275 | 41.1078 | 3.0604 | Up | 0         | 0         |
| Unigene95935  | Potri.016G131800.1 | 59.5162  | 7.1367  | 3.06   | Up | 2.45E-97  | 5.07E-96  |
| Unigene51959  | Potri.014G113500.1 | 33.5562  | 4.0329  | 3.0567 | Up | 1.09E-42  | 9.10E-42  |
| Unigene46825  | Potri.001G122300.1 | 24.6913  | 2.9714  | 3.0548 | Up | 2.53E-32  | 1.64E-31  |
| Unigene20112  | Potri.018G004900.1 | 54.5376  | 6.5641  | 3.0546 | Up | 1.14E-61  | 1.40E-60  |
| Unigene69702  | Potri.018G107300.1 | 3.8623   | 0.4656  | 3.0523 | Up | 6.64E-25  | 3.47E-24  |
| Unigene17284  | Potri.006G132400.2 | 47.173   | 5.6947  | 3.0503 | Up | 6.56E-79  | 1.06E-77  |
| Unigene93061  | Potri.006G039100.3 | 7.5161   | 0.9081  | 3.0491 | Up | 5.91E-19  | 2.53E-18  |
| Unigene94481  | Potri.002G085400.1 | 3.0748   | 0.3715  | 3.0491 | Up | 5.91E-19  | 2.53E-18  |



|               |                    |          |         |        |    |           |           |
|---------------|--------------------|----------|---------|--------|----|-----------|-----------|
| Unigene89991  | Potri.016G023500.1 | 10.7866  | 1.3033  | 3.049  | Up | 5.91E-19  | 2.53E-18  |
| Unigene70082  | Potri.009G034700.4 | 4.8376   | 0.5845  | 3.049  | Up | 5.91E-19  | 2.53E-18  |
| Unigene5692   | Potri.001G013200.1 | 11.8429  | 1.4309  | 3.049  | Up | 5.91E-19  | 2.53E-18  |
| Unigene31959  | Potri.007G055500.1 | 69.6189  | 8.4208  | 3.0474 | Up | 0         | 0         |
| Unigene62920  | Potri.009G059400.1 | 4.756    | 0.5757  | 3.0464 | Up | 5.68E-16  | 2.16E-15  |
| Unigene69396  | Potri.010G197600.2 | 5.0374   | 0.6098  | 3.0463 | Up | 5.68E-16  | 2.16E-15  |
| Unigene3893   | Potri.008G029300.4 | 82.5786  | 9.9963  | 3.0463 | Up | 8.48E-147 | 2.96E-145 |
| Unigene62687  | Potri.002G239400.1 | 7.0035   | 0.8478  | 3.0463 | Up | 5.68E-16  | 2.16E-15  |
| Unigene91708  | Potri.006G220600.1 | 6.8597   | 0.8314  | 3.0445 | Up | 1.77E-14  | 6.32E-14  |
| Unigene52863  | Potri.002G125900.5 | 13.1145  | 1.5903  | 3.0438 | Up | 3.00E-39  | 2.31E-38  |
| Unigene12068  | Potri.001G310400.1 | 54.6352  | 6.6272  | 3.0434 | Up | 8.03E-161 | 3.15E-159 |
| Unigene109868 | Potri.009G041700.1 | 419.3633 | 50.8767 | 3.0431 | Up | 0         | 0         |
| Unigene69285  | Potri.005G190200.2 | 11.2393  | 1.3639  | 3.0427 | Up | 5.97E-61  | 7.22E-60  |
| Unigene92307  | Potri.008G119900.1 | 5.6587   | 0.6869  | 3.0423 | Up | 5.57E-13  | 1.86E-12  |
| Unigene62425  | Potri.001G075900.1 | 5.9916   | 0.7273  | 3.0423 | Up | 5.57E-13  | 1.86E-12  |
| Unigene65681  | Potri.002G129400.1 | 5.5403   | 0.6726  | 3.0421 | Up | 5.57E-13  | 1.86E-12  |
| Unigene94065  | Potri.008G006600.1 | 3.1636   | 0.3848  | 3.0394 | Up | 1.76E-11  | 5.45E-11  |
| Unigene68829  | Potri.001G271400.1 | 3.5688   | 0.4341  | 3.0393 | Up | 1.76E-11  | 5.45E-11  |
| Unigene103676 | Potri.002G081000.3 | 77.1483  | 9.3958  | 3.0375 | Up | 3.49E-95  | 7.00E-94  |
| Unigene93187  | Potri.002G131800.1 | 7.2679   | 0.8864  | 3.0355 | Up | 1.03E-18  | 4.36E-18  |
| Unigene3384   | Potri.018G110100.2 | 16.9932  | 2.0726  | 3.0354 | Up | 2.15E-27  | 1.21E-26  |
| Unigene92415  | Potri.018G025500.1 | 4.1618   | 0.5076  | 3.0354 | Up | 5.63E-10  | 1.61E-09  |
| Unigene93843  | Potri.014G035700.1 | 3.0089   | 0.367   | 3.0354 | Up | 5.63E-10  | 1.61E-09  |
| Unigene18837  | Potri.003G078900.3 | 32.2027  | 3.9312  | 3.0341 | Up | 5.40E-92  | 1.04E-90  |
| Unigene99912  | Potri.002G182400.1 | 10.7802  | 1.3163  | 3.0338 | Up | 6.55E-26  | 3.52E-25  |
| Unigene69558  | Potri.014G071000.1 | 5.4653   | 0.6677  | 3.033  | Up | 3.18E-17  | 1.27E-16  |
| Unigene47069  | Potri.003G222400.2 | 148.8912 | 18.1908 | 3.033  | Up | 3.77E-159 | 1.46E-157 |
| Unigene85088  | Potri.018G092100.9 | 5.7585   | 0.705   | 3.03   | Up | 1.82E-08  | 4.75E-08  |
| Unigene57412  | Potri.015G126400.1 | 5.5918   | 0.6846  | 3.03   | Up | 9.88E-16  | 3.71E-15  |
| Unigene91990  | Potri.008G173700.1 | 3.6552   | 0.4475  | 3.03   | Up | 1.82E-08  | 4.75E-08  |
| Unigene20167  | Potri.001G254600.5 | 33.8388  | 4.1428  | 3.03   | Up | 1.88E-44  | 1.63E-43  |
| Unigene87619  | Potri.006G115100.4 | 5.1448   | 0.6299  | 3.0299 | Up | 1.82E-08  | 4.75E-08  |
| Unigene55355  | Potri.004G039000.1 | 5.0036   | 0.6126  | 3.0299 | Up | 9.88E-16  | 3.71E-15  |
| Unigene38053  | Potri.002G124200.1 | 3.8983   | 0.4773  | 3.0299 | Up | 1.82E-08  | 4.75E-08  |
| Unigene3366   | Potri.001G207300.2 | 22.2737  | 2.7298  | 3.0285 | Up | 5.99E-63  | 7.50E-62  |
| Unigene70049  | Potri.010G249300.1 | 6.5409   | 0.8028  | 3.0264 | Up | 3.73E-27  | 2.08E-26  |
| Unigene21652  | Potri.013G015900.1 | 66.461   | 8.1649  | 3.025  | Up | 0         | 0         |
| Unigene87515  | Potri.003G183700.1 | 13.4137  | 1.648   | 3.0249 | Up | 5.78E-20  | 2.57E-19  |
| Unigene32736  | Potri.018G019800.1 | 81.4917  | 10.0217 | 3.0235 | Up | 0         | 0         |

|               |                     |          |         |        |    |           |           |
|---------------|---------------------|----------|---------|--------|----|-----------|-----------|
| Unigene86587  | Potri.012G106100.1  | 4.3085   | 0.5305  | 3.0218 | Up | 6.00E-07  | 1.40E-06  |
| Unigene75833  | Potri.009G169100.1  | 5.8542   | 0.7208  | 3.0218 | Up | 6.00E-07  | 1.40E-06  |
| Unigene67975  | Potri.009G039100.2  | 4.3956   | 0.5412  | 3.0218 | Up | 6.00E-07  | 1.40E-06  |
| Unigene87707  | Potri.006G125300.3  | 4.0796   | 0.5023  | 3.0218 | Up | 6.00E-07  | 1.40E-06  |
| Unigene40169  | Potri.001G133000.2  | 17.145   | 2.1124  | 3.0208 | Up | 1.80E-62  | 2.23E-61  |
| Unigene116533 | Potri.007G138100.1  | 412.1484 | 50.7931 | 3.0205 | Up | 0         | 0         |
| Unigene42221  | Potri.005G109900.1  | 26.6707  | 3.2869  | 3.0205 | Up | 1.88E-45  | 1.66E-44  |
| Unigene91258  | Potri.007G052200.3  | 8.6912   | 1.0729  | 3.018  | Up | 5.52E-17  | 2.19E-16  |
| Unigene53641  | Potri.006G214800.1  | 25.461   | 3.1449  | 3.0172 | Up | 6.46E-27  | 3.58E-26  |
| Unigene115617 | Potri.001G108100.2  | 275.4331 | 34.0344 | 3.0166 | Up | 0         | 0         |
| Unigene111205 | Potri.018G115100.1  | 9.8925   | 1.223   | 3.0159 | Up | 3.06E-11  | 9.36E-11  |
| Unigene43496  | Potri.004G158300.5  | 37.2174  | 4.6027  | 3.0154 | Up | 6.36E-148 | 2.24E-146 |
| Unigene66628  | Potri.010G234300.2  | 4.1801   | 0.5196  | 3.0081 | Up | 2.04E-05  | 4.18E-05  |
| Unigene68083  | Potri.003G141900.4  | 5.7384   | 0.7133  | 3.0081 | Up | 5.35E-14  | 1.87E-13  |
| Unigene65296  | Potri.001G452300.3  | 3.3557   | 0.4171  | 3.0081 | Up | 2.04E-05  | 4.18E-05  |
| Unigene57194  | Potri.019G077500.3  | 4.2659   | 0.5303  | 3.008  | Up | 5.35E-14  | 1.87E-13  |
| Unigene85574  | Potri.012G096500.2  | 3.3441   | 0.4157  | 3.008  | Up | 2.04E-05  | 4.18E-05  |
| Unigene63856  | Potri.009G160100.1  | 7.1047   | 0.8832  | 3.008  | Up | 9.79E-10  | 2.75E-09  |
| Unigene67309  | Potri.009G070600.1  | 4.6071   | 0.5727  | 3.008  | Up | 9.79E-10  | 2.75E-09  |
| Unigene87654  | Potri.008G124500.1  | 3.0401   | 0.3779  | 3.008  | Up | 2.04E-05  | 4.18E-05  |
| Unigene64593  | Potri.005G099300.14 | 3.2653   | 0.4059  | 3.008  | Up | 2.04E-05  | 4.18E-05  |
| Unigene80928  | Potri.002G091300.1  | 3.8637   | 0.4803  | 3.008  | Up | 2.04E-05  | 4.18E-05  |
| Unigene62549  | Potri.002G014000.1  | 3.8484   | 0.4784  | 3.008  | Up | 2.04E-05  | 4.18E-05  |
| Unigene78437  | Potri.015G022700.3  | 4.0919   | 0.5087  | 3.0079 | Up | 2.04E-05  | 4.18E-05  |
| Unigene47083  | Potri.011G100800.2  | 4.0074   | 0.4982  | 3.0079 | Up | 2.04E-05  | 4.18E-05  |
| Unigene86759  | Potri.004G148300.1  | 3.1692   | 0.394   | 3.0079 | Up | 2.04E-05  | 4.18E-05  |
| Unigene35160  | Potri.001G393800.1  | 10.8965  | 1.3546  | 3.0079 | Up | 3.09E-18  | 1.29E-17  |
| Unigene69923  | Potri.001G378400.2  | 3.9745   | 0.4941  | 3.0079 | Up | 9.79E-10  | 2.75E-09  |
| Unigene51784  | Potri.001G019100.2  | 16.631   | 2.0714  | 3.0052 | Up | 2.52E-57  | 2.85E-56  |
| Unigene21243  | Potri.014G095700.1  | 43.5662  | 5.4311  | 3.0039 | Up | 1.80E-304 | 1.62E-302 |
| Unigene32188  | Potri.002G235800.1  | 33.8001  | 4.2137  | 3.0039 | Up | 1.05E-133 | 3.25E-132 |
| Unigene57495  | Potri.018G003300.1  | 4.2646   | 0.5327  | 3.001  | Up | 1.04E-23  | 5.24E-23  |
| Unigene64841  | Potri.001G455600.1  | 3.3909   | 0.4236  | 3.0009 | Up | 1.68E-12  | 5.47E-12  |
| Unigene11668  | Potri.008G055900.1  | 186.9804 | 23.3783 | 2.9996 | Up | 0         | 0         |
| Unigene56422  | Potri.005G079200.1  | 3.3002   | 0.4134  | 2.9969 | Up | 3.17E-08  | 8.13E-08  |
| Unigene82436  | Potri.002G160500.7  | 6.1451   | 0.7698  | 2.9969 | Up | 3.17E-08  | 8.13E-08  |
| Unigene73403  | Potri.010G174800.4  | 7.6013   | 0.9523  | 2.9968 | Up | 3.17E-08  | 8.13E-08  |
| Unigene83769  | Potri.008G082100.1  | 5.8966   | 0.7387  | 2.9968 | Up | 3.17E-08  | 8.13E-08  |
| Unigene64937  | Potri.006G229400.1  | 5.4185   | 0.6788  | 2.9968 | Up | 3.17E-08  | 8.13E-08  |

|               |                    |          |         |        |    |           |           |
|---------------|--------------------|----------|---------|--------|----|-----------|-----------|
| Unigene89405  | Potri.006G123800.1 | 4.518    | 0.566   | 2.9968 | Up | 3.17E-08  | 8.13E-08  |
| Unigene91976  | Potri.006G014000.1 | 3.5801   | 0.4485  | 2.9968 | Up | 3.17E-08  | 8.13E-08  |
| Unigene82724  | Potri.001G239900.4 | 6.0984   | 0.764   | 2.9968 | Up | 3.17E-08  | 8.13E-08  |
| Unigene91688  | Potri.012G045800.1 | 3.6956   | 0.463   | 2.9967 | Up | 3.17E-08  | 8.13E-08  |
| Unigene70391  | Potri.006G098500.1 | 3.9323   | 0.4936  | 2.994  | Up | 5.36E-18  | 2.21E-17  |
| Unigene37227  | Potri.012G017600.2 | 151.1394 | 18.9722 | 2.9939 | Up | 2.38E-176 | 1.06E-174 |
| Unigene91275  | Potri.010G202400.6 | 5.4188   | 0.6811  | 2.992  | Up | 5.32E-11  | 1.61E-10  |
| Unigene88984  | Potri.018G058900.6 | 6.4869   | 0.8154  | 2.9919 | Up | 5.32E-11  | 1.61E-10  |
| Unigene117575 | Potri.001G278500.3 | 214.0188 | 26.9349 | 2.9902 | Up | 0         | 0         |
| Unigene815    | Potri.002G163100.1 | 150.9591 | 19.0147 | 2.989  | Up | 0         | 0         |
| Unigene91218  | Potri.018G016400.2 | 8.5516   | 1.0781  | 2.9877 | Up | 1.66E-16  | 6.45E-16  |
| Unigene27659  | Potri.004G160300.1 | 11.2738  | 1.4213  | 2.9877 | Up | 1.18E-31  | 7.49E-31  |
| Unigene83540  | Potri.011G077700.4 | 12.9858  | 1.6372  | 2.9876 | Up | 1.66E-16  | 6.45E-16  |
| Unigene54820  | Potri.009G057900.1 | 3.3843   | 0.4267  | 2.9876 | Up | 1.66E-16  | 6.45E-16  |
| Unigene62084  | Potri.015G086400.1 | 5.8224   | 0.7351  | 2.9856 | Up | 5.52E-22  | 2.62E-21  |
| Unigene51271  | Potri.001G133000.1 | 21.3979  | 2.702   | 2.9854 | Up | 9.22E-66  | 1.21E-64  |
| Unigene16241  | Potri.006G104400.1 | 98.9391  | 12.4955 | 2.9851 | Up | 7.24E-292 | 6.19E-290 |
| Unigene92182  | Potri.004G231000.2 | 11.7575  | 1.4851  | 2.9849 | Up | 1.02E-24  | 5.30E-24  |
| Unigene26757  | Potri.010G243100.9 | 23.1514  | 2.9254  | 2.9844 | Up | 1.90E-27  | 1.07E-26  |
| Unigene22479  | Potri.006G064200.1 | 33.6362  | 4.2607  | 2.9809 | Up | 1.28E-130 | 3.83E-129 |
| Unigene66863  | Potri.001G104200.1 | 4.2024   | 0.5326  | 2.9801 | Up | 5.80E-26  | 3.12E-25  |
| Unigene60149  | Potri.019G023800.1 | 6.0679   | 0.7691  | 2.98   | Up | 3.12E-23  | 1.54E-22  |
| Unigene93139  | Potri.009G041200.1 | 5.8931   | 0.7469  | 2.98   | Up | 5.15E-15  | 1.88E-14  |
| Unigene65535  | Potri.004G202200.1 | 5.3965   | 0.684   | 2.98   | Up | 2.91E-12  | 9.37E-12  |
| Unigene84300  | Potri.002G236800.2 | 6.8674   | 0.8704  | 2.98   | Up | 1.70E-09  | 4.71E-09  |
| Unigene48074  | Potri.002G064000.1 | 10.065   | 1.2757  | 2.98   | Up | 9.28E-18  | 3.79E-17  |
| Unigene36162  | Potri.001G067500.1 | 15.8884  | 2.0138  | 2.98   | Up | 2.03E-31  | 1.28E-30  |
| Unigene89166  | Potri.019G054900.4 | 3.6338   | 0.4606  | 2.9799 | Up | 1.05E-06  | 2.40E-06  |
| Unigene48108  | Potri.015G126400.1 | 5.0727   | 0.643   | 2.9799 | Up | 1.70E-09  | 4.71E-09  |
| Unigene30325  | Potri.014G070900.1 | 4.5783   | 0.5803  | 2.9799 | Up | 1.05E-06  | 2.40E-06  |
| Unigene66012  | Potri.008G076300.2 | 3.3639   | 0.4264  | 2.9799 | Up | 1.05E-06  | 2.40E-06  |
| Unigene67440  | Potri.008G191400.1 | 3.1547   | 0.3999  | 2.9798 | Up | 1.70E-09  | 4.71E-09  |
| Unigene47559  | Potri.010G191300.1 | 275.9552 | 34.9965 | 2.9792 | Up | 0         | 0         |
| Unigene29966  | Potri.005G056100.1 | 12.0379  | 1.5333  | 2.9729 | Up | 6.63E-34  | 4.46E-33  |
| Unigene12892  | Potri.008G173500.1 | 36.9027  | 4.7025  | 2.9722 | Up | 1.14E-75  | 1.75E-74  |
| Unigene54745  | Potri.001G242100.1 | 9.3753   | 1.1947  | 2.9722 | Up | 2.87E-16  | 1.10E-15  |
| Unigene69089  | Potri.011G145900.1 | 7.7727   | 0.991   | 2.9715 | Up | 1.87E-28  | 1.09E-27  |
| Unigene70373  | Potri.005G125100.1 | 7.6967   | 0.9813  | 2.9715 | Up | 1.87E-28  | 1.09E-27  |
| Unigene22835  | Potri.001G278600.1 | 16.4812  | 2.1027  | 2.9705 | Up | 3.40E-74  | 5.09E-73  |

|               |                    |          |         |        |    |           |           |
|---------------|--------------------|----------|---------|--------|----|-----------|-----------|
| Unigene65801  | Potri.010G198500.1 | 4.6548   | 0.5939  | 2.9704 | Up | 1.61E-13  | 5.49E-13  |
| Unigene57198  | Potri.015G008500.1 | 3.0779   | 0.3934  | 2.9679 | Up | 9.22E-11  | 2.75E-10  |
| Unigene15500  | Potri.011G050400.3 | 7.6148   | 0.9733  | 2.9678 | Up | 9.22E-11  | 2.75E-10  |
| Unigene115022 | Potri.016G093000.1 | 18.9816  | 2.4311  | 2.9649 | Up | 3.05E-24  | 1.56E-23  |
| Unigene35399  | Potri.002G167700.7 | 17.2059  | 2.2037  | 2.9649 | Up | 3.05E-24  | 1.56E-23  |
| Unigene17266  | Potri.006G227700.1 | 12.9322  | 1.6576  | 2.9638 | Up | 5.39E-51  | 5.37E-50  |
| Unigene43902  | Potri.011G017600.1 | 6.7235   | 0.8623  | 2.963  | Up | 1.35E-41  | 1.10E-40  |
| Unigene83851  | Potri.019G087200.3 | 5.7384   | 0.736   | 2.9629 | Up | 5.50E-08  | 1.39E-07  |
| Unigene87970  | Potri.009G041800.1 | 4.8202   | 0.6182  | 2.9629 | Up | 5.50E-08  | 1.39E-07  |
| Unigene3653   | Potri.001G438600.1 | 4.2861   | 0.5497  | 2.9629 | Up | 8.91E-15  | 3.22E-14  |
| Unigene63478  | Potri.002G223100.1 | 3.6688   | 0.4706  | 2.9627 | Up | 5.50E-08  | 1.39E-07  |
| Unigene105358 | Potri.009G049700.1 | 108.4185 | 13.9398 | 2.9593 | Up | 4.23E-194 | 2.12E-192 |
| Unigene114284 | Potri.005G191000.3 | 9.3598   | 1.2041  | 2.9585 | Up | 5.05E-12  | 1.60E-11  |
| Unigene38532  | Potri.002G021800.1 | 16.1139  | 2.075   | 2.9571 | Up | 2.32E-41  | 1.88E-40  |
| Unigene3599   | Potri.016G119900.4 | 11.6261  | 1.4979  | 2.9564 | Up | 1.93E-78  | 3.10E-77  |
| Unigene43890  | Potri.016G055300.2 | 46.3853  | 5.9763  | 2.9563 | Up | 1.93E-78  | 3.10E-77  |
| Unigene70362  | Potri.013G077700.1 | 5.6602   | 0.7297  | 2.9555 | Up | 5.06E-20  | 2.25E-19  |
| Unigene34492  | Potri.019G068900.2 | 8.9479   | 1.1554  | 2.9532 | Up | 7.63E-44  | 6.53E-43  |
| Unigene83753  | Potri.014G114200.1 | 3.4283   | 0.4432  | 2.9515 | Up | 3.55E-05  | 7.12E-05  |
| Unigene60782  | Potri.001G302100.2 | 4.2004   | 0.543   | 2.9515 | Up | 3.55E-05  | 7.12E-05  |
| Unigene76789  | Potri.018G003600.1 | 24.5392  | 3.1725  | 2.9514 | Up | 2.99E-25  | 1.57E-24  |
| Unigene5133   | Potri.016G062500.5 | 8.9951   | 1.1629  | 2.9514 | Up | 2.78E-13  | 9.39E-13  |
| Unigene55448  | Potri.014G156900.1 | 3.9596   | 0.5119  | 2.9514 | Up | 2.77E-17  | 1.11E-16  |
| Unigene63835  | Potri.010G177300.1 | 4.2644   | 0.5513  | 2.9514 | Up | 2.78E-13  | 9.39E-13  |
| Unigene65676  | Potri.009G099400.2 | 4.4831   | 0.5796  | 2.9514 | Up | 3.55E-05  | 7.12E-05  |
| Unigene91086  | Potri.007G144600.3 | 11.5122  | 1.4883  | 2.9514 | Up | 2.85E-21  | 1.32E-20  |
| Unigene22968  | Potri.006G062600.1 | 23.9868  | 3.1011  | 2.9514 | Up | 3.40E-33  | 2.26E-32  |
| Unigene19348  | Potri.002G108500.1 | 12.2294  | 1.5811  | 2.9514 | Up | 2.77E-17  | 1.11E-16  |
| Unigene93064  | Potri.004G101600.5 | 3.5122   | 0.4541  | 2.9513 | Up | 2.95E-09  | 8.04E-09  |
| Unigene112849 | Potri.008G134000.1 | 175.927  | 22.777  | 2.9493 | Up | 1.48E-185 | 7.04E-184 |
| Unigene60336  | Potri.004G066300.1 | 6.8395   | 0.8858  | 2.9488 | Up | 1.81E-30  | 1.11E-29  |
| Unigene28214  | Potri.017G017000.1 | 6.0231   | 0.7818  | 2.9456 | Up | 1.54E-14  | 5.50E-14  |
| Unigene20466  | Potri.009G078100.1 | 12.7664  | 1.6571  | 2.9456 | Up | 9.62E-28  | 5.47E-27  |
| Unigene11410  | Potri.001G409500.1 | 76.4007  | 9.9205  | 2.9451 | Up | 0         | 0         |
| Unigene66306  | Potri.010G099000.2 | 11.7394  | 1.5249  | 2.9446 | Up | 9.09E-24  | 4.57E-23  |
| Unigene67576  | Potri.015G146800.1 | 4.4606   | 0.58    | 2.9431 | Up | 1.60E-10  | 4.69E-10  |
| Unigene61417  | Potri.009G031300.3 | 4.3529   | 0.566   | 2.9431 | Up | 1.60E-10  | 4.69E-10  |
| Unigene62870  | Potri.018G100500.5 | 6.9841   | 0.9095  | 2.9409 | Up | 8.57E-16  | 3.23E-15  |
| Unigene38567  | Potri.016G117100.1 | 15.973   | 2.0802  | 2.9408 | Up | 3.11E-30  | 1.90E-29  |

|               |                    |          |         |        |    |           |           |
|---------------|--------------------|----------|---------|--------|----|-----------|-----------|
| Unigene65817  | Potri.004G148300.1 | 11.2022  | 1.4589  | 2.9408 | Up | 3.11E-30  | 1.90E-29  |
| Unigene93281  | Potri.002G123600.3 | 6.1158   | 0.7965  | 2.9408 | Up | 8.57E-16  | 3.23E-15  |
| Unigene33458  | Potri.019G027800.1 | 6.7164   | 0.8751  | 2.9402 | Up | 1.91E-35  | 1.34E-34  |
| Unigene68820  | Potri.015G057500.1 | 3.4002   | 0.444   | 2.937  | Up | 1.82E-06  | 4.10E-06  |
| Unigene30695  | Potri.016G054700.2 | 4.698    | 0.6135  | 2.9369 | Up | 8.72E-12  | 2.74E-11  |
| Unigene93808  | Potri.006G143600.1 | 3.799    | 0.4961  | 2.9369 | Up | 8.72E-12  | 2.74E-11  |
| Unigene54021  | Potri.004G199500.1 | 8.8766   | 1.1592  | 2.9369 | Up | 4.78E-17  | 1.90E-16  |
| Unigene85291  | Potri.010G062300.1 | 4.2888   | 0.5601  | 2.9368 | Up | 1.82E-06  | 4.10E-06  |
| Unigene48396  | Potri.004G224500.2 | 3.4097   | 0.4453  | 2.9368 | Up | 1.82E-06  | 4.10E-06  |
| Unigene110712 | Potri.008G018800.1 | 88.8558  | 11.6091 | 2.9362 | Up | 6.28E-86  | 1.12E-84  |
| Unigene72     | Potri.004G010500.1 | 52.2323  | 6.8252  | 2.936  | Up | 1.17E-128 | 3.43E-127 |
| Unigene104000 | Potri.016G101700.1 | 145.0031 | 18.9627 | 2.9348 | Up | 2.57E-251 | 1.78E-249 |
| Unigene90779  | Potri.002G086400.1 | 16.3777  | 2.1419  | 2.9348 | Up | 9.42E-29  | 5.52E-28  |
| Unigene77742  | Potri.005G070100.3 | 23.6924  | 3.1044  | 2.932  | Up | 8.87E-25  | 4.61E-24  |
| Unigene58062  | Potri.001G382400.1 | 5.633    | 0.7381  | 2.932  | Up | 4.80E-13  | 1.60E-12  |
| Unigene93623  | Potri.001G122300.1 | 18.1292  | 2.3755  | 2.932  | Up | 4.23E-48  | 3.97E-47  |
| Unigene32783  | Potri.008G112800.1 | 109.1389 | 14.3087 | 2.9312 | Up | 0         | 0         |
| Unigene67543  | Potri.019G080800.5 | 3.5565   | 0.4673  | 2.928  | Up | 9.53E-08  | 2.37E-07  |
| Unigene62764  | Potri.014G196700.1 | 4.9173   | 0.6461  | 2.928  | Up | 9.53E-08  | 2.37E-07  |
| Unigene87847  | Potri.005G210400.1 | 4.7346   | 0.6221  | 2.928  | Up | 9.53E-08  | 2.37E-07  |
| Unigene22430  | Potri.003G148200.1 | 65.3227  | 8.585   | 2.9277 | Up | 0         | 0         |
| Unigene14887  | Potri.001G074600.1 | 75.5785  | 9.9364  | 2.9272 | Up | 9.59E-147 | 3.34E-145 |
| Unigene108374 | Potri.008G157500.2 | 30.9929  | 4.0768  | 2.9264 | Up | 1.62E-28  | 9.43E-28  |
| Unigene113821 | Potri.014G017300.1 | 463.8056 | 61.0506 | 2.9254 | Up | 0         | 0         |
| Unigene65609  | Potri.009G051100.4 | 5.2782   | 0.695   | 2.925  | Up | 1.48E-15  | 5.52E-15  |
| Unigene49582  | Potri.007G028900.2 | 10.7423  | 1.4145  | 2.9249 | Up | 9.23E-30  | 5.56E-29  |
| Unigene76328  | Potri.010G122200.3 | 8.123    | 1.0716  | 2.9222 | Up | 5.10E-09  | 1.37E-08  |
| Unigene15692  | Potri.005G020500.1 | 16.5401  | 2.182   | 2.9222 | Up | 8.25E-17  | 3.25E-16  |
| Unigene63353  | Potri.002G122600.1 | 3.0873   | 0.4073  | 2.9222 | Up | 5.10E-09  | 1.37E-08  |
| Unigene61168  | Potri.005G176200.1 | 3.4813   | 0.4593  | 2.9221 | Up | 5.10E-09  | 1.37E-08  |
| Unigene11571  | Potri.001G409500.1 | 88.4026  | 11.6708 | 2.9212 | Up | 0         | 0         |
| Unigene9436   | Potri.010G070800.3 | 5.4724   | 0.7234  | 2.9193 | Up | 4.91E-27  | 2.74E-26  |
| Unigene94032  | Potri.018G132700.1 | 8.4677   | 1.1194  | 2.9192 | Up | 4.91E-27  | 2.74E-26  |
| Unigene90274  | Potri.008G091400.1 | 5.6395   | 0.7461  | 2.9181 | Up | 2.76E-10  | 8.00E-10  |
| Unigene67644  | Potri.003G113100.1 | 6.4135   | 0.8486  | 2.918  | Up | 2.59E-19  | 1.13E-18  |
| Unigene89710  | Potri.017G123600.1 | 12.5706  | 1.6651  | 2.9164 | Up | 1.46E-20  | 6.61E-20  |
| Unigene22202  | Potri.008G152000.1 | 40.5935  | 5.3928  | 2.9121 | Up | 1.63E-197 | 8.33E-196 |
| Unigene47683  | Potri.007G144600.2 | 39.7518  | 5.2839  | 2.9113 | Up | 1.22E-49  | 1.18E-48  |
| Unigene92295  | Potri.017G030900.2 | 6.4695   | 0.8605  | 2.9104 | Up | 4.58E-14  | 1.60E-13  |

|              |                    |         |        |        |    |           |           |
|--------------|--------------------|---------|--------|--------|----|-----------|-----------|
| Unigene19780 | Potri.005G020000.2 | 9.4414  | 1.2558 | 2.9104 | Up | 4.58E-14  | 1.60E-13  |
| Unigene88366 | Potri.008G201400.5 | 9.999   | 1.3314 | 2.9088 | Up | 2.55E-15  | 9.40E-15  |
| Unigene64328 | Potri.016G115300.2 | 9.3009  | 1.2396 | 2.9075 | Up | 1.42E-16  | 5.54E-16  |
| Unigene24967 | Potri.003G190900.1 | 7.8144  | 1.0415 | 2.9075 | Up | 1.42E-16  | 5.54E-16  |
| Unigene48782 | Potri.016G141700.4 | 9.3695  | 1.2498 | 2.9063 | Up | 2.88E-34  | 1.96E-33  |
| Unigene92907 | Potri.012G134200.1 | 8.1683  | 1.0903 | 2.9053 | Up | 4.46E-19  | 1.92E-18  |
| Unigene54632 | Potri.007G038500.4 | 9.2838  | 1.2392 | 2.9053 | Up | 4.46E-19  | 1.92E-18  |
| Unigene31479 | Potri.003G164800.1 | 18.83   | 2.5237 | 2.8994 | Up | 4.95E-34  | 3.35E-33  |
| Unigene64739 | Potri.014G130900.1 | 3.004   | 0.4045 | 2.8927 | Up | 6.17E-05  | 1.21E-04  |
| Unigene69205 | Potri.018G112400.1 | 5.1008  | 0.6869 | 2.8926 | Up | 8.80E-09  | 2.34E-08  |
| Unigene63765 | Potri.011G143100.2 | 3.8904  | 0.5239 | 2.8926 | Up | 7.89E-14  | 2.73E-13  |
| Unigene83409 | Potri.003G085100.2 | 4.4371  | 0.5975 | 2.8926 | Up | 3.14E-06  | 6.95E-06  |
| Unigene64423 | Potri.002G153800.9 | 4.8284  | 0.6502 | 2.8926 | Up | 1.65E-07  | 4.02E-07  |
| Unigene75741 | Potri.002G097500.1 | 4.0324  | 0.543  | 2.8926 | Up | 6.17E-05  | 1.21E-04  |
| Unigene87257 | Potri.001G370200.3 | 3.8134  | 0.5135 | 2.8926 | Up | 3.14E-06  | 6.95E-06  |
| Unigene79060 | Potri.001G023100.2 | 3.73    | 0.5023 | 2.8926 | Up | 6.17E-05  | 1.21E-04  |
| Unigene8521  | Potri.018G046200.3 | 9.2781  | 1.2495 | 2.8925 | Up | 5.20E-40  | 4.07E-39  |
| Unigene89730 | Potri.017G125100.1 | 8.2203  | 1.107  | 2.8925 | Up | 7.89E-14  | 2.73E-13  |
| Unigene88596 | Potri.017G074800.1 | 7.1047  | 0.9568 | 2.8925 | Up | 2.60E-11  | 7.96E-11  |
| Unigene67286 | Potri.016G031100.7 | 5.8452  | 0.7872 | 2.8925 | Up | 2.50E-26  | 1.36E-25  |
| Unigene90693 | Potri.014G030500.1 | 3.8256  | 0.5152 | 2.8925 | Up | 1.65E-07  | 4.02E-07  |
| Unigene5488  | Potri.011G165500.1 | 27.0136 | 3.6379 | 2.8925 | Up | 1.31E-162 | 5.22E-161 |
| Unigene88575 | Potri.010G090900.3 | 3.5523  | 0.4784 | 2.8925 | Up | 3.14E-06  | 6.95E-06  |
| Unigene83477 | Potri.007G065500.4 | 7.7362  | 1.0418 | 2.8925 | Up | 4.76E-10  | 1.36E-09  |
| Unigene64958 | Potri.018G100900.5 | 4.9971  | 0.673  | 2.8924 | Up | 4.76E-10  | 1.36E-09  |
| Unigene81472 | Potri.013G064300.2 | 3.5105  | 0.4728 | 2.8924 | Up | 6.17E-05  | 1.21E-04  |
| Unigene3954  | Potri.008G016800.1 | 4.4759  | 0.6028 | 2.8924 | Up | 6.17E-05  | 1.21E-04  |
| Unigene47896 | Potri.006G249100.1 | 3.5951  | 0.4842 | 2.8924 | Up | 1.65E-07  | 4.02E-07  |
| Unigene75215 | Potri.004G229500.6 | 8.1752  | 1.101  | 2.8924 | Up | 8.80E-09  | 2.34E-08  |
| Unigene85736 | Potri.014G053300.1 | 3.0553  | 0.4115 | 2.8923 | Up | 6.17E-05  | 1.21E-04  |
| Unigene84407 | Potri.008G195100.3 | 3.2201  | 0.4337 | 2.8923 | Up | 6.17E-05  | 1.21E-04  |
| Unigene35751 | Potri.011G042800.1 | 61.0519 | 8.2299 | 2.8911 | Up | 6.67E-160 | 2.59E-158 |
| Unigene24181 | Potri.001G148800.1 | 24.0169 | 3.2448 | 2.8878 | Up | 1.04E-49  | 1.01E-48  |
| Unigene70178 | Potri.009G065600.1 | 3.5775  | 0.4844 | 2.8847 | Up | 7.88E-30  | 4.76E-29  |
| Unigene43874 | Potri.016G117100.1 | 21.5375 | 2.9167 | 2.8844 | Up | 6.46E-57  | 7.26E-56  |
| Unigene39643 | Potri.017G152900.1 | 32.2758 | 4.3744 | 2.8833 | Up | 2.31E-146 | 8.03E-145 |
| Unigene69087 | Potri.013G128200.1 | 5.4496  | 0.7393 | 2.8819 | Up | 2.36E-22  | 1.13E-21  |
| Unigene6516  | Potri.001G284800.1 | 7.7626  | 1.055  | 2.8793 | Up | 7.63E-69  | 1.05E-67  |
| Unigene26235 | Potri.005G133400.1 | 22.7193 | 3.0912 | 2.8777 | Up | 2.08E-61  | 2.54E-60  |

|               |                    |          |         |        |    |           |           |
|---------------|--------------------|----------|---------|--------|----|-----------|-----------|
| Unigene102358 | Potri.009G049700.1 | 160.2765 | 21.8099 | 2.8775 | Up | 0         | 0         |
| Unigene44197  | Potri.008G103800.1 | 58.6208  | 7.9827  | 2.8765 | Up | 1.35E-180 | 6.19E-179 |
| Unigene67922  | Potri.013G068100.1 | 11.7575  | 1.6016  | 2.876  | Up | 7.53E-15  | 2.73E-14  |
| Unigene16432  | Potri.001G050000.2 | 5.2424   | 0.7141  | 2.876  | Up | 7.53E-15  | 2.73E-14  |
| Unigene94076  | Potri.003G105000.5 | 4.0091   | 0.5467  | 2.8745 | Up | 1.36E-13  | 4.65E-13  |
| Unigene59659  | Potri.010G036100.1 | 3.0866   | 0.4215  | 2.8724 | Up | 2.45E-12  | 7.91E-12  |
| Unigene64003  | Potri.009G122600.1 | 9.1636   | 1.2514  | 2.8724 | Up | 2.45E-12  | 7.91E-12  |
| Unigene30058  | Potri.014G197200.1 | 11.4639  | 1.5664  | 2.8716 | Up | 4.29E-33  | 2.84E-32  |
| Unigene117013 | Potri.001G108100.2 | 224.0161 | 30.6397 | 2.8701 | Up | 0         | 0         |
| Unigene70300  | Potri.004G066400.1 | 3.7478   | 0.5127  | 2.8699 | Up | 4.47E-11  | 1.35E-10  |
| Unigene15003  | Potri.012G039700.2 | 7.7045   | 1.054   | 2.8698 | Up | 4.47E-11  | 1.35E-10  |
| Unigene46017  | Potri.004G135300.1 | 15.8063  | 2.1624  | 2.8698 | Up | 1.32E-30  | 8.15E-30  |
| Unigene5743   | Potri.001G402000.1 | 9.9571   | 1.3622  | 2.8698 | Up | 2.57E-40  | 2.03E-39  |
| Unigene100593 | Potri.017G114500.1 | 10.0422  | 1.3739  | 2.8697 | Up | 4.47E-11  | 1.35E-10  |
| Unigene59921  | Potri.005G025300.1 | 9.7927   | 1.344   | 2.8652 | Up | 1.26E-25  | 6.72E-25  |
| Unigene100986 | Potri.011G018600.1 | 24.2691  | 3.3341  | 2.8638 | Up | 2.22E-24  | 1.14E-23  |
| Unigene102739 | Potri.015G066900.1 | 57.4228  | 7.8919  | 2.8632 | Up | 3.90E-106 | 8.95E-105 |
| Unigene115965 | Potri.008G108300.1 | 41.3485  | 5.6841  | 2.8628 | Up | 2.88E-53  | 3.01E-52  |
| Unigene59729  | Potri.008G173600.2 | 8.1349   | 1.1188  | 2.8622 | Up | 2.26E-30  | 1.39E-29  |
| Unigene60266  | Potri.005G033700.2 | 6.517    | 0.8963  | 2.8622 | Up | 1.52E-08  | 3.97E-08  |
| Unigene61477  | Potri.002G153800.9 | 3.2525   | 0.4473  | 2.8622 | Up | 1.52E-08  | 3.97E-08  |
| Unigene59137  | Potri.003G178700.1 | 8.6643   | 1.1917  | 2.8621 | Up | 3.92E-23  | 1.93E-22  |
| Unigene42267  | Potri.014G127600.1 | 6.5823   | 0.9067  | 2.8599 | Up | 4.11E-35  | 2.85E-34  |
| Unigene24853  | Potri.017G056800.1 | 15.0599  | 2.0753  | 2.8593 | Up | 1.29E-14  | 4.63E-14  |
| Unigene77214  | Potri.001G145500.1 | 27.8936  | 3.8438  | 2.8593 | Up | 6.97E-28  | 3.98E-27  |
| Unigene49341  | Potri.012G104700.1 | 58.6453  | 8.085   | 2.8587 | Up | 5.90E-163 | 2.36E-161 |
| Unigene10379  | Potri.005G179100.2 | 22.3001  | 3.0747  | 2.8585 | Up | 4.93E-53  | 5.12E-52  |
| Unigene8863   | Potri.003G006500.1 | 116.6147 | 16.1005 | 2.8566 | Up | 2.33E-292 | 2.00E-290 |
| Unigene16355  | Potri.017G126200.1 | 11.7788  | 1.6269  | 2.856  | Up | 2.33E-13  | 7.89E-13  |
| Unigene90073  | Potri.010G118900.1 | 3.9104   | 0.5401  | 2.856  | Up | 2.84E-07  | 6.83E-07  |
| Unigene86287  | Potri.T041600.1    | 4.8489   | 0.6698  | 2.8559 | Up | 2.84E-07  | 6.83E-07  |
| Unigene43572  | Potri.001G019100.2 | 38.4099  | 5.3082  | 2.8552 | Up | 1.11E-170 | 4.71E-169 |
| Unigene102000 | Potri.008G159000.3 | 29.447   | 4.0789  | 2.8519 | Up | 1.23E-33  | 8.24E-33  |
| Unigene94113  | Potri.009G077200.1 | 3.4859   | 0.4829  | 2.8517 | Up | 4.21E-12  | 1.34E-11  |
| Unigene18216  | Potri.019G130700.1 | 57.3411  | 7.9471  | 2.8511 | Up | 2.57E-127 | 7.42E-126 |
| Unigene31664  | Potri.010G190200.1 | 9.69     | 1.3433  | 2.8507 | Up | 4.16E-43  | 3.50E-42  |
| Unigene24202  | Potri.012G085000.1 | 61.1764  | 8.482   | 2.8505 | Up | 3.53E-146 | 1.22E-144 |
| Unigene51140  | Potri.014G105700.1 | 12.1524  | 1.6852  | 2.8502 | Up | 6.91E-17  | 2.73E-16  |
| Unigene21863  | Potri.005G119300.1 | 54.4428  | 7.5557  | 2.8491 | Up | 0         | 0         |

|               |                    |          |         |        |    |           |           |
|---------------|--------------------|----------|---------|--------|----|-----------|-----------|
| Unigene110086 | Potri.017G090600.1 | 243.4643 | 33.7921 | 2.849  | Up | 2.34E-220 | 1.36E-218 |
| Unigene89444  | Potri.001G075300.1 | 3.248    | 0.4515  | 2.8468 | Up | 5.43E-06  | 1.17E-05  |
| Unigene88985  | Potri.015G082400.1 | 6.7031   | 0.9318  | 2.8467 | Up | 7.67E-11  | 2.30E-10  |
| Unigene70430  | Potri.002G102600.2 | 11.5629  | 1.6074  | 2.8467 | Up | 7.67E-11  | 2.30E-10  |
| Unigene79941  | Potri.008G002500.3 | 4.7195   | 0.6561  | 2.8466 | Up | 5.43E-06  | 1.17E-05  |
| Unigene89882  | Potri.006G253400.1 | 3.1506   | 0.438   | 2.8466 | Up | 5.43E-06  | 1.17E-05  |
| Unigene87133  | Potri.005G241200.1 | 3.718    | 0.5169  | 2.8466 | Up | 5.43E-06  | 1.17E-05  |
| Unigene4299   | Potri.005G070100.2 | 19.1888  | 2.6713  | 2.8447 | Up | 1.16E-28  | 6.79E-28  |
| Unigene25511  | Potri.003G052800.1 | 9.265    | 1.2907  | 2.8436 | Up | 3.73E-19  | 1.61E-18  |
| Unigene111691 | Potri.018G069200.5 | 13.4913  | 1.881   | 2.8425 | Up | 2.22E-14  | 7.86E-14  |
| Unigene19808  | Potri.006G092300.1 | 52.6218  | 7.3367  | 2.8425 | Up | 2.43E-53  | 2.54E-52  |
| Unigene27178  | Potri.003G101600.1 | 34.9683  | 4.8754  | 2.8425 | Up | 2.16E-40  | 1.71E-39  |
| Unigene47343  | Potri.006G201400.1 | 6.4146   | 0.8958  | 2.8401 | Up | 1.41E-09  | 3.92E-09  |
| Unigene37854  | Potri.001G293300.1 | 5.4585   | 0.7623  | 2.8401 | Up | 1.41E-09  | 3.92E-09  |
| Unigene54192  | Potri.015G016200.1 | 5.9768   | 0.8347  | 2.84   | Up | 1.41E-09  | 3.92E-09  |
| Unigene14671  | Potri.014G076300.6 | 4.969    | 0.6952  | 2.8375 | Up | 3.99E-13  | 1.34E-12  |
| Unigene55909  | Potri.006G065100.1 | 5.419    | 0.7582  | 2.8374 | Up | 3.99E-13  | 1.34E-12  |
| Unigene38134  | Potri.002G041000.1 | 19.3275  | 2.7043  | 2.8373 | Up | 4.41E-60  | 5.25E-59  |
| Unigene119076 | Potri.004G082200.1 | 198.6906 | 27.826  | 2.836  | Up | 0         | 0         |
| Unigene63951  | Potri.018G070500.1 | 3.1295   | 0.4386  | 2.835  | Up | 3.60E-20  | 1.61E-19  |
| Unigene79985  | Potri.009G034800.1 | 22.2275  | 3.1164  | 2.8344 | Up | 1.11E-23  | 5.60E-23  |
| Unigene57359  | Potri.005G199100.3 | 8.7359   | 1.2264  | 2.8325 | Up | 1.23E-51  | 1.24E-50  |
| Unigene12821  | Potri.004G075400.2 | 73.3638  | 10.3039 | 2.8319 | Up | 3.29E-280 | 2.63E-278 |
| Unigene65230  | Potri.010G093600.1 | 3.0694   | 0.4313  | 2.8312 | Up | 2.61E-08  | 6.71E-08  |
| Unigene35974  | Potri.019G033200.6 | 15.598   | 2.1919  | 2.8311 | Up | 6.39E-19  | 2.73E-18  |
| Unigene68585  | Potri.011G094200.1 | 4.8468   | 0.6811  | 2.8311 | Up | 2.61E-08  | 6.71E-08  |
| Unigene82428  | Potri.010G242200.1 | 3.2869   | 0.4619  | 2.8311 | Up | 1.07E-04  | 2.04E-04  |
| Unigene56800  | Potri.009G022500.1 | 3.0101   | 0.423   | 2.8311 | Up | 1.07E-04  | 2.04E-04  |
| Unigene98427  | Potri.004G100700.2 | 3.3511   | 0.4709  | 2.8311 | Up | 1.07E-04  | 2.04E-04  |
| Unigene68460  | Potri.010G062700.1 | 6.227    | 0.8751  | 2.831  | Up | 6.59E-47  | 6.03E-46  |
| Unigene70892  | Potri.006G051800.1 | 4.2681   | 0.5998  | 2.831  | Up | 1.07E-04  | 2.04E-04  |
| Unigene29821  | Potri.005G197500.3 | 3.2312   | 0.4541  | 2.831  | Up | 2.61E-08  | 6.71E-08  |
| Unigene78581  | Potri.004G217900.1 | 3.6198   | 0.5087  | 2.831  | Up | 1.07E-04  | 2.04E-04  |
| Unigene60228  | Potri.004G210000.6 | 3.73     | 0.5242  | 2.831  | Up | 1.07E-04  | 2.04E-04  |
| Unigene63534  | Potri.001G428700.3 | 5.8961   | 0.8286  | 2.831  | Up | 2.61E-08  | 6.71E-08  |
| Unigene56926  | Potri.013G038100.2 | 3.0639   | 0.4306  | 2.8309 | Up | 1.07E-04  | 2.04E-04  |
| Unigene34333  | Potri.001G222600.4 | 8.5514   | 1.2037  | 2.8287 | Up | 1.08E-31  | 6.85E-31  |
| Unigene42099  | Potri.017G123900.1 | 24.2586  | 3.4164  | 2.8279 | Up | 3.25E-94  | 6.43E-93  |
| Unigene15600  | Potri.004G197700.1 | 9.0297   | 1.2722  | 2.8274 | Up | 3.48E-21  | 1.61E-20  |



|               |                    |          |         |        |    |           |           |
|---------------|--------------------|----------|---------|--------|----|-----------|-----------|
| Unigene22224  | Potri.015G039500.1 | 44.253   | 6.2356  | 2.8272 | Up | 4.84E-168 | 2.02E-166 |
| Unigene105541 | Potri.T165000.1    | 137.7008 | 19.4445 | 2.8241 | Up | 3.81E-157 | 1.45E-155 |
| Unigene21248  | Potri.008G101500.2 | 68.8711  | 9.7287  | 2.8236 | Up | 0         | 0         |
| Unigene24921  | Potri.018G033300.4 | 7.6609   | 1.0824  | 2.8233 | Up | 1.32E-10  | 3.89E-10  |
| Unigene93982  | Potri.008G053100.2 | 3.2365   | 0.4573  | 2.8232 | Up | 1.32E-10  | 3.89E-10  |
| Unigene62729  | Potri.005G214600.5 | 4.1748   | 0.5899  | 2.8232 | Up | 1.32E-10  | 3.89E-10  |
| Unigene46486  | Potri.002G003300.1 | 9.0217   | 1.2747  | 2.8232 | Up | 1.10E-47  | 1.03E-46  |
| Unigene90485  | Potri.010G062700.1 | 9.6163   | 1.3604  | 2.8215 | Up | 2.03E-16  | 7.85E-16  |
| Unigene108854 | Potri.001G088800.1 | 24.3335  | 3.4444  | 2.8206 | Up | 3.36E-22  | 1.61E-21  |
| Unigene64833  | Potri.019G006200.1 | 4.4712   | 0.6338  | 2.8186 | Up | 4.89E-07  | 1.15E-06  |
| Unigene18985  | Potri.T144400.1    | 5.6923   | 0.8069  | 2.8185 | Up | 1.09E-18  | 4.63E-18  |
| Unigene84222  | Potri.010G033500.1 | 5.1354   | 0.728   | 2.8185 | Up | 4.89E-07  | 1.15E-06  |
| Unigene69914  | Potri.012G036300.1 | 3.1015   | 0.4397  | 2.8184 | Up | 4.89E-07  | 1.15E-06  |
| Unigene63599  | Potri.005G242700.5 | 4.5575   | 0.6461  | 2.8184 | Up | 4.89E-07  | 1.15E-06  |
| Unigene31926  | Potri.013G096600.1 | 87.1282  | 12.3571 | 2.8178 | Up | 0         | 0         |
| Unigene37182  | Potri.010G248700.1 | 13.7475  | 1.9519  | 2.8162 | Up | 5.94E-21  | 2.73E-20  |
| Unigene2298   | Potri.007G135700.1 | 144.0262 | 20.4532 | 2.8159 | Up | 0         | 0         |
| Unigene68185  | Potri.004G081900.1 | 6.0289   | 0.8565  | 2.8154 | Up | 3.62E-15  | 1.33E-14  |
| Unigene52522  | Potri.001G239100.1 | 10.5085  | 1.4929  | 2.8154 | Up | 3.62E-15  | 1.33E-14  |
| Unigene81631  | Potri.006G052800.7 | 15.5049  | 2.2062  | 2.8131 | Up | 1.94E-17  | 7.85E-17  |
| Unigene67875  | Potri.002G167700.7 | 6.8168   | 0.97    | 2.813  | Up | 1.94E-17  | 7.85E-17  |
| Unigene9519   | Potri.006G100300.4 | 20.6084  | 2.9359  | 2.8114 | Up | 1.05E-19  | 4.63E-19  |
| Unigene26640  | Potri.008G168900.1 | 6.4814   | 0.9238  | 2.8107 | Up | 3.07E-40  | 2.42E-39  |
| Unigene70202  | Potri.014G097900.2 | 9.6608   | 1.3786  | 2.8089 | Up | 3.15E-24  | 1.61E-23  |
| Unigene39592  | Potri.002G104400.2 | 9.0378   | 1.2911  | 2.8074 | Up | 9.63E-29  | 5.64E-28  |
| Unigene85777  | Potri.016G104400.1 | 12.4756  | 1.783   | 2.8067 | Up | 3.46E-16  | 1.33E-15  |
| Unigene26668  | Potri.011G150700.3 | 17.8595  | 2.5541  | 2.8058 | Up | 1.87E-18  | 7.84E-18  |
| Unigene43615  | Potri.015G001300.1 | 67.2986  | 9.6282  | 2.8052 | Up | 5.56E-242 | 3.67E-240 |
| Unigene13178  | Potri.013G059400.1 | 35.7437  | 5.1145  | 2.805  | Up | 5.66E-136 | 1.78E-134 |
| Unigene29468  | Potri.003G046100.1 | 18.177   | 2.6035  | 2.8036 | Up | 1.68E-53  | 1.77E-52  |
| Unigene93355  | Potri.002G082400.1 | 14.3663  | 2.059   | 2.8027 | Up | 2.91E-34  | 1.98E-33  |
| Unigene97882  | Potri.001G085800.1 | 23.81    | 3.4144  | 2.8019 | Up | 1.62E-45  | 1.44E-44  |
| Unigene49976  | Potri.007G097000.1 | 43.548   | 6.251   | 2.8004 | Up | 6.88E-104 | 1.54E-102 |
| Unigene64792  | Potri.010G205800.1 | 3.3772   | 0.4851  | 2.7995 | Up | 4.47E-08  | 1.13E-07  |
| Unigene62704  | Potri.018G075000.2 | 3.6331   | 0.5219  | 2.7994 | Up | 9.34E-06  | 1.98E-05  |
| Unigene91367  | Potri.012G141300.2 | 4.0155   | 0.5768  | 2.7994 | Up | 4.47E-08  | 1.13E-07  |
| Unigene24810  | Potri.011G023200.1 | 7.4599   | 1.0716  | 2.7994 | Up | 1.64E-28  | 9.55E-28  |
| Unigene87596  | Potri.008G055900.4 | 10.5565  | 1.5164  | 2.7994 | Up | 6.19E-15  | 2.25E-14  |
| Unigene84192  | Potri.006G219100.4 | 4.0543   | 0.5824  | 2.7994 | Up | 9.34E-06  | 1.98E-05  |

|               |                    |          |         |        |    |           |           |
|---------------|--------------------|----------|---------|--------|----|-----------|-----------|
| Unigene27657  | Potri.004G118600.1 | 32.4344  | 4.6592  | 2.7994 | Up | 1.59E-46  | 1.44E-45  |
| Unigene94110  | Potri.004G087800.1 | 23.2186  | 3.3353  | 2.7994 | Up | 3.08E-71  | 4.41E-70  |
| Unigene65133  | Potri.004G074300.2 | 7.3041   | 1.0492  | 2.7994 | Up | 1.17E-12  | 3.83E-12  |
| Unigene61576  | Potri.001G168800.1 | 3.5078   | 0.5039  | 2.7994 | Up | 9.34E-06  | 1.98E-05  |
| Unigene88183  | Potri.017G120400.2 | 3.4115   | 0.4901  | 2.7993 | Up | 9.34E-06  | 1.98E-05  |
| Unigene66778  | Potri.016G035800.2 | 4.5364   | 0.6517  | 2.7993 | Up | 4.47E-08  | 1.13E-07  |
| Unigene78818  | Potri.010G052000.1 | 4.682    | 0.6726  | 2.7993 | Up | 9.34E-06  | 1.98E-05  |
| Unigene93243  | Potri.005G234100.1 | 3.0518   | 0.4384  | 2.7993 | Up | 4.47E-08  | 1.13E-07  |
| Unigene93807  | Potri.004G160300.1 | 7.7707   | 1.1163  | 2.7993 | Up | 9.80E-22  | 4.62E-21  |
| Unigene93016  | Potri.004G082200.3 | 5.3184   | 0.764   | 2.7993 | Up | 1.17E-12  | 3.83E-12  |
| Unigene87381  | Potri.002G035800.1 | 3.5523   | 0.5103  | 2.7993 | Up | 9.34E-06  | 1.98E-05  |
| Unigene2312   | Potri.012G078900.2 | 36.6016  | 5.2633  | 2.7979 | Up | 3.03E-72  | 4.41E-71  |
| Unigene31568  | Potri.004G087000.4 | 13.7048  | 1.9788  | 2.792  | Up | 5.91E-16  | 2.24E-15  |
| Unigene117581 | Potri.004G041600.1 | 125.5079 | 18.1376 | 2.7907 | Up | 3.20E-187 | 1.54E-185 |
| Unigene3801   | Potri.003G164700.1 | 8.4307   | 1.2189  | 2.7901 | Up | 4.72E-36  | 3.37E-35  |
| Unigene69350  | Potri.011G154100.1 | 3.705    | 0.5367  | 2.7873 | Up | 3.06E-19  | 1.33E-18  |
| Unigene46422  | Potri.015G008900.1 | 3.0024   | 0.4354  | 2.7857 | Up | 4.13E-09  | 1.12E-08  |
| Unigene35195  | Potri.005G260000.3 | 8.9588   | 1.2993  | 2.7856 | Up | 5.66E-17  | 2.24E-16  |
| Unigene54281  | Potri.004G073500.1 | 4.0324   | 0.5848  | 2.7856 | Up | 4.13E-09  | 1.12E-08  |
| Unigene86833  | Potri.002G205800.1 | 6.3178   | 0.9163  | 2.7855 | Up | 4.13E-09  | 1.12E-08  |
| Unigene23946  | Potri.002G024200.2 | 22.7673  | 3.3053  | 2.7841 | Up | 1.38E-64  | 1.78E-63  |
| Unigene11064  | Potri.005G197000.3 | 60.4897  | 8.7839  | 2.7838 | Up | 7.73E-186 | 3.69E-184 |
| Unigene108626 | Potri.003G138700.1 | 440.2423 | 63.9486 | 2.7833 | Up | 0         | 0         |
| Unigene21771  | Potri.004G038900.1 | 30.9256  | 4.4933  | 2.783  | Up | 7.10E-177 | 3.15E-175 |
| Unigene94231  | Potri.004G234200.1 | 19.7766  | 2.8739  | 2.7827 | Up | 1.36E-65  | 1.78E-64  |
| Unigene5620   | Potri.008G087100.3 | 121.6797 | 17.6941 | 2.7817 | Up | 3.41E-249 | 2.34E-247 |
| Unigene112952 | Potri.001G329300.1 | 35.6451  | 5.1852  | 2.7812 | Up | 7.85E-37  | 5.71E-36  |
| Unigene59209  | Potri.001G259800.1 | 3.2938   | 0.4795  | 2.7802 | Up | 8.39E-07  | 1.94E-06  |
| Unigene70407  | Potri.010G191700.8 | 4.7426   | 0.6905  | 2.78   | Up | 1.56E-23  | 7.80E-23  |
| Unigene108801 | Potri.008G134000.1 | 6.5718   | 0.9568  | 2.78   | Up | 8.39E-07  | 1.94E-06  |
| Unigene3734   | Potri.004G118600.1 | 17.0381  | 2.4806  | 2.78   | Up | 1.56E-23  | 7.80E-23  |
| Unigene49158  | Potri.010G061100.1 | 93.3728  | 13.6176 | 2.7775 | Up | 4.25E-225 | 2.54E-223 |
| Unigene21507  | Potri.004G202300.1 | 50.863   | 7.4255  | 2.7761 | Up | 3.59E-206 | 1.94E-204 |
| Unigene87634  | Potri.013G039200.1 | 25.0223  | 3.6532  | 2.776  | Up | 2.45E-33  | 1.63E-32  |
| Unigene25313  | Potri.004G067400.1 | 4.0829   | 0.5964  | 2.7752 | Up | 3.85E-10  | 1.11E-09  |
| Unigene86150  | Potri.012G050800.1 | 7.3848   | 1.0788  | 2.7751 | Up | 3.85E-10  | 1.11E-09  |
| Unigene90607  | Potri.003G147700.1 | 5.6718   | 0.8286  | 2.7751 | Up | 3.85E-10  | 1.11E-09  |
| Unigene4985   | Potri.010G254000.1 | 9.6195   | 1.407   | 2.7733 | Up | 2.22E-46  | 2.01E-45  |
| Unigene41350  | Potri.009G158900.1 | 6.6401   | 0.9715  | 2.7729 | Up | 1.47E-25  | 7.80E-25  |

|               |                    |          |         |        |    |           |           |
|---------------|--------------------|----------|---------|--------|----|-----------|-----------|
| Unigene30676  | Potri.009G077900.2 | 10.1636  | 1.4883  | 2.7717 | Up | 9.64E-17  | 3.79E-16  |
| Unigene94503  | Potri.001G198600.1 | 4.6371   | 0.679   | 2.7717 | Up | 4.27E-32  | 2.75E-31  |
| Unigene105227 | Potri.014G130100.7 | 49.1286  | 7.1943  | 2.7716 | Up | 6.54E-78  | 1.04E-76  |
| Unigene10809  | Potri.002G117900.1 | 100.4017 | 14.7157 | 2.7704 | Up | 0         | 0         |
| Unigene107803 | Potri.004G224400.3 | 573.4576 | 84.1316 | 2.769  | Up | 0         | 0         |
| Unigene13787  | Potri.003G223200.4 | 25.632   | 3.7612  | 2.7687 | Up | 6.84E-43  | 5.73E-42  |
| Unigene44606  | Potri.015G076400.1 | 133.6219 | 19.6104 | 2.7685 | Up | 0         | 0         |
| Unigene117782 | Potri.013G059300.3 | 46.454   | 6.8199  | 2.768  | Up | 3.48E-72  | 5.06E-71  |
| Unigene68876  | Potri.013G039400.1 | 3.2013   | 0.4703  | 2.767  | Up | 3.61E-11  | 1.10E-10  |
| Unigene91243  | Potri.012G138900.3 | 21.9623  | 3.2265  | 2.767  | Up | 2.22E-37  | 1.63E-36  |
| Unigene44698  | Potri.016G071400.1 | 7.9284   | 1.1648  | 2.7669 | Up | 1.22E-40  | 9.68E-40  |
| Unigene78453  | Potri.015G012400.1 | 3.4624   | 0.5087  | 2.7669 | Up | 1.84E-04  | 3.43E-04  |
| Unigene73427  | Potri.014G094200.3 | 3.8891   | 0.5714  | 2.7669 | Up | 1.84E-04  | 3.43E-04  |
| Unigene67805  | Potri.012G038900.5 | 6.2961   | 0.925   | 2.7669 | Up | 4.84E-21  | 2.23E-20  |
| Unigene15338  | Potri.010G048400.5 | 5.5445   | 0.8146  | 2.7669 | Up | 7.65E-08  | 1.91E-07  |
| Unigene73616  | Potri.004G152700.3 | 3.8707   | 0.5687  | 2.7669 | Up | 1.84E-04  | 3.43E-04  |
| Unigene82357  | Potri.004G125000.9 | 3.144    | 0.4619  | 2.7669 | Up | 1.84E-04  | 3.43E-04  |
| Unigene70616  | Potri.004G111900.2 | 4.103    | 0.6028  | 2.7669 | Up | 1.84E-04  | 3.43E-04  |
| Unigene94003  | Potri.015G002600.1 | 19.2277  | 2.8299  | 2.7644 | Up | 1.09E-55  | 1.20E-54  |
| Unigene45970  | Potri.009G034800.2 | 7.1466   | 1.0547  | 2.7604 | Up | 3.40E-12  | 1.09E-11  |
| Unigene37891  | Potri.005G106800.1 | 7.9849   | 1.1785  | 2.7603 | Up | 3.40E-12  | 1.09E-11  |
| Unigene110126 | Potri.009G049700.1 | 282.0251 | 41.6399 | 2.7598 | Up | 1.07E-247 | 7.29E-246 |
| Unigene21279  | Potri.009G054200.2 | 49.9485  | 7.3842  | 2.7579 | Up | 1.73E-251 | 1.20E-249 |
| Unigene90919  | Potri.002G068900.1 | 9.5352   | 1.41    | 2.7576 | Up | 1.64E-16  | 6.38E-16  |
| Unigene91266  | Potri.002G045800.2 | 9.2344   | 1.3655  | 2.7576 | Up | 1.64E-16  | 6.38E-16  |
| Unigene107632 | Potri.018G003600.1 | 9.4172   | 1.3926  | 2.7575 | Up | 7.05E-09  | 1.88E-08  |
| Unigene85861  | Potri.009G124100.3 | 6.4703   | 0.9568  | 2.7575 | Up | 7.05E-09  | 1.88E-08  |
| Unigene9440   | Potri.003G063000.9 | 6.7218   | 0.994   | 2.7575 | Up | 1.64E-16  | 6.38E-16  |
| Unigene112157 | Potri.001G002600.1 | 7.9262   | 1.1721  | 2.7575 | Up | 7.05E-09  | 1.88E-08  |
| Unigene29658  | Potri.010G118000.1 | 43.644   | 6.4597  | 2.7562 | Up | 8.62E-94  | 1.69E-92  |
| Unigene25173  | Potri.019G059000.1 | 11.5895  | 1.7222  | 2.7505 | Up | 3.06E-14  | 1.08E-13  |
| Unigene5309   | Potri.019G008900.1 | 5.3815   | 0.7997  | 2.7505 | Up | 1.60E-05  | 3.32E-05  |
| Unigene38282  | Potri.018G058600.1 | 6.4132   | 0.953   | 2.7505 | Up | 3.06E-14  | 1.08E-13  |
| Unigene68289  | Potri.014G157900.1 | 3.5349   | 0.5253  | 2.7505 | Up | 1.60E-05  | 3.32E-05  |
| Unigene93906  | Potri.018G027300.1 | 3.2003   | 0.4756  | 2.7504 | Up | 6.56E-10  | 1.86E-09  |
| Unigene87561  | Potri.016G019400.1 | 3.4123   | 0.5071  | 2.7504 | Up | 1.60E-05  | 3.32E-05  |
| Unigene88248  | Potri.002G229000.2 | 3.2878   | 0.4886  | 2.7504 | Up | 1.60E-05  | 3.32E-05  |
| Unigene59341  | Potri.002G131800.1 | 3.9768   | 0.591   | 2.7504 | Up | 1.60E-05  | 3.32E-05  |
| Unigene14566  | Potri.002G082400.1 | 46.1738  | 6.8718  | 2.7483 | Up | 1.66E-50  | 1.64E-49  |

|               |                    |          |         |        |    |           |           |
|---------------|--------------------|----------|---------|--------|----|-----------|-----------|
| Unigene17487  | Potri.003G053000.1 | 12.7267  | 1.8972  | 2.7459 | Up | 7.19E-25  | 3.75E-24  |
| Unigene74784  | Potri.015G132300.4 | 11.1727  | 1.6667  | 2.7449 | Up | 6.15E-11  | 1.85E-10  |
| Unigene41175  | Potri.001G094200.1 | 12.2712  | 1.8326  | 2.7433 | Up | 2.79E-16  | 1.07E-15  |
| Unigene107892 | Potri.003G222400.1 | 221.2249 | 33.0588 | 2.7424 | Up | 8.41E-178 | 3.76E-176 |
| Unigene99881  | Potri.004G041600.1 | 100.1046 | 14.9599 | 2.7423 | Up | 1.26E-253 | 8.88E-252 |
| Unigene106224 | Potri.006G034200.1 | 3.8256   | 0.5724  | 2.7406 | Up | 1.43E-06  | 3.26E-06  |
| Unigene93241  | Potri.004G162500.1 | 4.8829   | 0.7306  | 2.7406 | Up | 5.79E-12  | 1.84E-11  |
| Unigene93052  | Potri.018G027200.1 | 5.0671   | 0.7582  | 2.7405 | Up | 5.79E-12  | 1.84E-11  |
| Unigene4093   | Potri.011G101800.1 | 7.1047   | 1.0631  | 2.7405 | Up | 5.79E-12  | 1.84E-11  |
| Unigene47655  | Potri.013G050800.1 | 35.3949  | 5.301   | 2.7392 | Up | 3.28E-34  | 2.23E-33  |
| Unigene70058  | Potri.001G200000.2 | 5.8005   | 0.8702  | 2.7368 | Up | 5.48E-13  | 1.83E-12  |
| Unigene23548  | Potri.002G012800.1 | 51.9297  | 7.803   | 2.7345 | Up | 2.79E-106 | 6.43E-105 |
| Unigene88280  | Potri.016G061900.1 | 4.8602   | 0.7306  | 2.7339 | Up | 1.31E-07  | 3.21E-07  |
| Unigene70094  | Potri.011G168200.4 | 3.0262   | 0.4549  | 2.7339 | Up | 1.31E-07  | 3.21E-07  |
| Unigene69811  | Potri.008G091500.1 | 3.6369   | 0.5467  | 2.7339 | Up | 1.31E-07  | 3.21E-07  |
| Unigene91652  | Potri.004G189200.1 | 3.7127   | 0.5581  | 2.7339 | Up | 1.31E-07  | 3.21E-07  |
| Unigene58672  | Potri.003G222700.4 | 4.0299   | 0.6058  | 2.7338 | Up | 1.31E-07  | 3.21E-07  |
| Unigene92494  | Potri.014G014900.1 | 3.3345   | 0.5013  | 2.7337 | Up | 1.31E-07  | 3.21E-07  |
| Unigene93991  | Potri.004G209700.9 | 9.457    | 1.423   | 2.7324 | Up | 1.11E-27  | 6.31E-27  |
| Unigene51981  | Potri.002G227100.1 | 9.5437   | 1.4368  | 2.7317 | Up | 5.42E-35  | 3.75E-34  |
| Unigene56508  | Potri.013G064200.1 | 5.9705   | 0.8992  | 2.7311 | Up | 1.08E-28  | 6.32E-28  |
| Unigene53361  | Potri.009G066100.2 | 23.165   | 3.4898  | 2.7307 | Up | 5.29E-36  | 3.76E-35  |
| Unigene15867  | Potri.001G329300.1 | 32.527   | 4.9045  | 2.7295 | Up | 3.51E-66  | 4.65E-65  |
| Unigene61058  | Potri.016G024800.1 | 5.6686   | 0.855   | 2.729  | Up | 1.20E-08  | 3.16E-08  |
| Unigene68402  | Potri.010G222800.2 | 3.9512   | 0.596   | 2.7289 | Up | 1.20E-08  | 3.16E-08  |
| Unigene99176  | Potri.001G288100.1 | 5.1306   | 0.7739  | 2.7289 | Up | 4.74E-16  | 1.81E-15  |
| Unigene22992  | Potri.015G083400.1 | 98.6949  | 14.8958 | 2.7281 | Up | 0         | 0         |
| Unigene3449   | Potri.016G096300.1 | 36.9426  | 5.5759  | 2.728  | Up | 6.40E-62  | 7.86E-61  |
| Unigene3971   | Potri.001G210400.1 | 4.2435   | 0.6406  | 2.7278 | Up | 2.07E-24  | 1.06E-23  |
| Unigene12834  | Potri.008G192600.1 | 35.3394  | 5.3415  | 2.726  | Up | 8.16E-91  | 1.55E-89  |
| Unigene118347 | Potri.003G084000.1 | 4.9329   | 0.7459  | 2.7254 | Up | 1.12E-09  | 3.13E-09  |
| Unigene16584  | Potri.013G057300.1 | 10.2709  | 1.5531  | 2.7253 | Up | 4.35E-18  | 1.80E-17  |
| Unigene93965  | Potri.008G176300.2 | 6.127    | 0.9265  | 2.7253 | Up | 4.35E-18  | 1.80E-17  |
| Unigene29746  | Potri.008G134300.1 | 7.4338   | 1.1241  | 2.7253 | Up | 4.35E-18  | 1.80E-17  |
| Unigene94771  | Potri.016G044800.2 | 11.6447  | 1.7642  | 2.7226 | Up | 1.05E-10  | 3.11E-10  |
| Unigene36828  | Potri.013G049900.1 | 52.7552  | 7.9926  | 2.7226 | Up | 4.98E-76  | 7.70E-75  |
| Unigene66862  | Potri.003G110900.1 | 6.8597   | 1.0393  | 2.7225 | Up | 4.03E-20  | 1.80E-19  |
| Unigene2306   | Potri.003G081200.1 | 61.1955  | 9.2785  | 2.7215 | Up | 4.37E-148 | 1.54E-146 |
| Unigene49075  | Potri.014G040500.1 | 8.2389   | 1.2507  | 2.7197 | Up | 1.60E-33  | 1.07E-32  |

|               |                    |         |         |        |    |           |           |
|---------------|--------------------|---------|---------|--------|----|-----------|-----------|
| Unigene47562  | Potri.001G133000.1 | 9.1632  | 1.3937  | 2.7169 | Up | 8.84E-14  | 3.05E-13  |
| Unigene800    | Potri.007G027700.1 | 82.1854 | 12.5031 | 2.7166 | Up | 4.25E-265 | 3.17E-263 |
| Unigene31801  | Potri.018G031600.1 | 14.7756 | 2.2554  | 2.7118 | Up | 2.04E-247 | 1.38E-245 |
| Unigene47070  | Potri.002G242900.3 | 17.0908 | 2.6127  | 2.7096 | Up | 6.14E-23  | 3.01E-22  |
| Unigene107411 | Potri.009G079700.1 | 61.7308 | 9.4435  | 2.7086 | Up | 1.86E-49  | 1.80E-48  |
| Unigene62876  | Potri.018G115400.1 | 3.0098  | 0.4632  | 2.7    | Up | 2.74E-05  | 5.57E-05  |
| Unigene58398  | Potri.006G273100.1 | 3.1145  | 0.4793  | 2.7    | Up | 2.22E-07  | 5.37E-07  |
| Unigene63730  | Potri.016G031900.1 | 3.7568  | 0.5782  | 2.6999 | Up | 2.74E-05  | 5.57E-05  |
| Unigene89097  | Potri.012G136100.1 | 5.2519  | 0.8083  | 2.6999 | Up | 2.05E-08  | 5.32E-08  |
| Unigene79668  | Potri.012G039000.2 | 3.2234  | 0.4961  | 2.6999 | Up | 3.16E-04  | 5.72E-04  |
| Unigene4170   | Potri.009G163700.4 | 17.8924 | 2.7538  | 2.6999 | Up | 8.62E-29  | 5.06E-28  |
| Unigene73247  | Potri.008G080900.1 | 4.9733  | 0.7654  | 2.6999 | Up | 2.74E-05  | 5.57E-05  |
| Unigene62199  | Potri.008G012600.4 | 3.6602  | 0.5633  | 2.6999 | Up | 3.16E-04  | 5.72E-04  |
| Unigene19425  | Potri.006G234500.2 | 4.4067  | 0.6782  | 2.6999 | Up | 2.74E-05  | 5.57E-05  |
| Unigene65596  | Potri.006G039100.3 | 3.2911  | 0.5065  | 2.6999 | Up | 3.16E-04  | 5.72E-04  |
| Unigene80651  | Potri.005G157400.1 | 4.1943  | 0.6455  | 2.6999 | Up | 2.74E-05  | 5.57E-05  |
| Unigene93487  | Potri.005G083200.1 | 3.1136  | 0.4792  | 2.6999 | Up | 2.05E-08  | 5.32E-08  |
| Unigene87892  | Potri.004G157100.2 | 3.2234  | 0.4961  | 2.6999 | Up | 2.74E-05  | 5.57E-05  |
| Unigene75321  | Potri.002G167700.7 | 4.7472  | 0.7306  | 2.6999 | Up | 2.74E-05  | 5.57E-05  |
| Unigene58960  | Potri.T093700.2    | 8.4833  | 1.3057  | 2.6998 | Up | 1.78E-10  | 5.21E-10  |
| Unigene15559  | Potri.T055100.2    | 4.6864  | 0.7213  | 2.6998 | Up | 2.05E-08  | 5.32E-08  |
| Unigene65475  | Potri.T024900.2    | 6.0956  | 0.9382  | 2.6998 | Up | 2.22E-07  | 5.37E-07  |
| Unigene26724  | Potri.018G097700.2 | 3.8397  | 0.591   | 2.6998 | Up | 1.78E-10  | 5.21E-10  |
| Unigene89787  | Potri.018G020700.2 | 15.7806 | 2.4288  | 2.6998 | Up | 1.00E-23  | 5.05E-23  |
| Unigene48744  | Potri.018G003200.1 | 3.3909  | 0.5219  | 2.6998 | Up | 2.74E-05  | 5.57E-05  |
| Unigene85555  | Potri.013G046700.3 | 3.6013  | 0.5543  | 2.6998 | Up | 2.74E-05  | 5.57E-05  |
| Unigene90462  | Potri.011G123700.4 | 6.1354  | 0.9443  | 2.6998 | Up | 1.78E-10  | 5.21E-10  |
| Unigene56957  | Potri.010G169400.1 | 3.73    | 0.5741  | 2.6998 | Up | 3.16E-04  | 5.72E-04  |
| Unigene82985  | Potri.010G169200.1 | 3.9411  | 0.6066  | 2.6998 | Up | 2.74E-05  | 5.57E-05  |
| Unigene70638  | Potri.005G194600.1 | 5.2219  | 0.8037  | 2.6998 | Up | 2.74E-05  | 5.57E-05  |
| Unigene68450  | Potri.004G087000.2 | 3.2135  | 0.4946  | 2.6998 | Up | 2.74E-05  | 5.57E-05  |
| Unigene73853  | Potri.002G014000.1 | 3.6774  | 0.566   | 2.6998 | Up | 3.16E-04  | 5.72E-04  |
| Unigene7073   | Potri.001G218800.1 | 32.9713 | 5.0746  | 2.6998 | Up | 6.64E-39  | 5.07E-38  |
| Unigene76097  | Potri.001G196600.1 | 3.4968  | 0.5382  | 2.6998 | Up | 3.16E-04  | 5.72E-04  |
| Unigene66296  | Potri.001G113100.1 | 5.615   | 0.8642  | 2.6998 | Up | 1.25E-17  | 5.09E-17  |
| Unigene81557  | Potri.018G139800.3 | 3.0717  | 0.4728  | 2.6997 | Up | 3.16E-04  | 5.72E-04  |
| Unigene80562  | Potri.006G045800.1 | 3.1457  | 0.4842  | 2.6997 | Up | 3.16E-04  | 5.72E-04  |
| Unigene31998  | Potri.001G013300.1 | 85.8719 | 13.242  | 2.6971 | Up | 0         | 0         |
| Unigene19640  | Potri.001G054400.1 | 67.3643 | 10.3927 | 2.6964 | Up | 6.94E-62  | 8.53E-61  |

|               |                    |          |         |        |    |           |           |
|---------------|--------------------|----------|---------|--------|----|-----------|-----------|
| Unigene17454  | Potri.003G142700.2 | 27.0072  | 4.1693  | 2.6955 | Up | 8.98E-49  | 8.55E-48  |
| Unigene10889  | Potri.003G151100.1 | 30.9429  | 4.7826  | 2.6937 | Up | 1.08E-170 | 4.57E-169 |
| Unigene112391 | Potri.004G041600.1 | 126.6952 | 19.5944 | 2.6928 | Up | 1.30E-119 | 3.49E-118 |
| Unigene29972  | Potri.018G132700.1 | 6.5362   | 1.012   | 2.6912 | Up | 1.59E-25  | 8.46E-25  |
| Unigene27004  | Potri.014G028900.5 | 10.8143  | 1.6744  | 2.6912 | Up | 1.59E-25  | 8.46E-25  |
| Unigene32105  | Potri.001G284500.1 | 7.0094   | 1.0857  | 2.6907 | Up | 1.71E-69  | 2.38E-68  |
| Unigene31526  | Potri.014G090300.1 | 5.3991   | 0.8364  | 2.6905 | Up | 1.70E-23  | 8.46E-23  |
| Unigene67004  | Potri.013G151000.1 | 9.2643   | 1.4352  | 2.6904 | Up | 1.70E-23  | 8.46E-23  |
| Unigene35572  | Potri.002G054900.1 | 7.5399   | 1.1692  | 2.689  | Up | 1.88E-20  | 8.51E-20  |
| Unigene20611  | Potri.008G179700.3 | 10.6413  | 1.6547  | 2.685  | Up | 2.30E-15  | 8.53E-15  |
| Unigene9829   | Potri.002G212400.4 | 10.9908  | 1.7093  | 2.6848 | Up | 3.67E-56  | 4.06E-55  |
| Unigene73829  | Potri.005G179100.2 | 15.7604  | 2.4526  | 2.6839 | Up | 2.41E-14  | 8.54E-14  |
| Unigene45323  | Potri.013G059300.3 | 18.7828  | 2.9236  | 2.6836 | Up | 3.97E-52  | 4.05E-51  |
| Unigene118586 | Potri.001G347600.1 | 215.2274 | 33.5023 | 2.6835 | Up | 0         | 0         |
| Unigene34149  | Potri.008G108400.1 | 46.1673  | 7.19    | 2.6828 | Up | 7.51E-74  | 1.12E-72  |
| Unigene68531  | Potri.003G136200.2 | 5.4409   | 0.8475  | 2.6826 | Up | 2.54E-13  | 8.59E-13  |
| Unigene28274  | Potri.001G310500.3 | 6.2291   | 0.9703  | 2.6825 | Up | 2.54E-13  | 8.59E-13  |
| Unigene62447  | Potri.014G160000.4 | 13.8891  | 2.1645  | 2.6818 | Up | 2.78E-24  | 1.42E-23  |
| Unigene47761  | Potri.003G130300.1 | 4.0847   | 0.6369  | 2.6811 | Up | 2.67E-12  | 8.61E-12  |
| Unigene90     | Potri.013G105300.4 | 104.729  | 16.3489 | 2.6794 | Up | 0         | 0         |
| Unigene2157   | Potri.018G062500.2 | 18.3179  | 2.8602  | 2.6791 | Up | 5.03E-41  | 4.04E-40  |
| Unigene51098  | Potri.007G144700.1 | 6.5239   | 1.0186  | 2.6791 | Up | 3.07E-21  | 1.42E-20  |
| Unigene84420  | Potri.002G091400.4 | 9.2578   | 1.4455  | 2.6791 | Up | 2.83E-11  | 8.67E-11  |
| Unigene7305   | Potri.001G406100.1 | 11.8037  | 1.8439  | 2.6784 | Up | 3.92E-30  | 2.39E-29  |
| Unigene6200   | Potri.016G050500.1 | 4.7179   | 0.7385  | 2.6755 | Up | 3.43E-18  | 1.43E-17  |
| Unigene48210  | Potri.003G073400.2 | 7.0497   | 1.1047  | 2.6739 | Up | 3.22E-09  | 8.77E-09  |
| Unigene12323  | Potri.001G471500.1 | 49.0784  | 7.6909  | 2.6739 | Up | 5.38E-80  | 8.83E-79  |
| Unigene56575  | Potri.001G237000.3 | 5.9636   | 0.9345  | 2.6739 | Up | 3.22E-09  | 8.77E-09  |
| Unigene94062  | Potri.005G085800.2 | 8.4307   | 1.3212  | 2.6738 | Up | 4.54E-25  | 2.38E-24  |
| Unigene47522  | Potri.001G108100.2 | 327.4072 | 51.3123 | 2.6737 | Up | 0         | 0         |
| Unigene102364 | Potri.003G148200.1 | 17.3847  | 2.7259  | 2.673  | Up | 6.27E-32  | 4.02E-31  |
| Unigene35428  | Potri.008G130500.1 | 187.2487 | 29.3972 | 2.6712 | Up | 2.64E-214 | 1.48E-212 |
| Unigene47399  | Potri.019G059000.1 | 6.1314   | 0.9633  | 2.6702 | Up | 3.47E-08  | 8.88E-08  |
| Unigene86056  | Potri.005G185900.1 | 6.0282   | 0.9471  | 2.6701 | Up | 3.47E-08  | 8.88E-08  |
| Unigene30160  | Potri.001G075900.1 | 5.3981   | 0.8481  | 2.6701 | Up | 5.00E-22  | 2.38E-21  |
| Unigene34037  | Potri.017G128800.1 | 83.0204  | 13.0836 | 2.6657 | Up | 0         | 0         |
| Unigene7734   | Potri.008G101500.2 | 50.0416  | 7.8873  | 2.6655 | Up | 7.14E-155 | 2.67E-153 |
| Unigene88167  | Potri.017G082500.1 | 4.6624   | 0.7351  | 2.6651 | Up | 3.78E-07  | 8.98E-07  |
| Unigene87953  | Potri.009G082400.2 | 4.7055   | 0.7419  | 2.6651 | Up | 3.78E-07  | 8.98E-07  |

|               |                    |          |         |        |    |           |           |
|---------------|--------------------|----------|---------|--------|----|-----------|-----------|
| Unigene77907  | Potri.008G104400.1 | 26.1416  | 4.1216  | 2.6651 | Up | 7.65E-25  | 3.99E-24  |
| Unigene63797  | Potri.001G011900.1 | 3.1083   | 0.4901  | 2.665  | Up | 3.78E-07  | 8.98E-07  |
| Unigene70372  | Potri.007G107800.4 | 7.8987   | 1.2464  | 2.6638 | Up | 1.12E-29  | 6.71E-29  |
| Unigene99174  | Potri.010G187800.2 | 20.831   | 3.29    | 2.6626 | Up | 1.15E-28  | 6.70E-28  |
| Unigene20708  | Potri.009G059200.1 | 45.2013  | 7.14    | 2.6624 | Up | 4.47E-77  | 7.03E-76  |
| Unigene55065  | Potri.010G094300.1 | 12.4332  | 1.9657  | 2.6611 | Up | 3.04E-69  | 4.23E-68  |
| Unigene10318  | Potri.008G087100.1 | 25.2918  | 3.9998  | 2.6607 | Up | 2.01E-63  | 2.54E-62  |
| Unigene92775  | Potri.008G100400.1 | 5.0425   | 0.7989  | 2.6581 | Up | 4.79E-11  | 1.45E-10  |
| Unigene67914  | Potri.001G287400.3 | 4.5949   | 0.728   | 2.658  | Up | 4.16E-06  | 9.08E-06  |
| Unigene90351  | Potri.012G099500.1 | 3.3373   | 0.5288  | 2.6579 | Up | 4.16E-06  | 9.08E-06  |
| Unigene31113  | Potri.001G011800.2 | 32.5133  | 5.1565  | 2.6566 | Up | 2.25E-57  | 2.54E-56  |
| Unigene41497  | Potri.010G145200.1 | 7.3014   | 1.1586  | 2.6558 | Up | 9.05E-20  | 3.99E-19  |
| Unigene30151  | Potri.004G175400.1 | 272.0597 | 43.1904 | 2.6551 | Up | 0         | 0         |
| Unigene16061  | Potri.012G110800.1 | 10.0666  | 1.5983  | 2.655  | Up | 6.57E-15  | 2.39E-14  |
| Unigene51881  | Potri.001G355300.2 | 6.184    | 0.9818  | 2.655  | Up | 6.57E-15  | 2.39E-14  |
| Unigene40761  | Potri.003G178100.1 | 4.3003   | 0.6828  | 2.6549 | Up | 6.57E-15  | 2.39E-14  |
| Unigene91203  | Potri.011G057700.1 | 5.5494   | 0.8821  | 2.6533 | Up | 5.09E-10  | 1.46E-09  |
| Unigene59076  | Potri.018G069600.3 | 5.7284   | 0.9117  | 2.6515 | Up | 2.05E-26  | 1.12E-25  |
| Unigene2455   | Potri.008G159000.3 | 17.0932  | 2.7212  | 2.6511 | Up | 1.07E-42  | 8.96E-42  |
| Unigene52021  | Potri.014G080600.4 | 28.6149  | 4.5583  | 2.6502 | Up | 7.14E-38  | 5.33E-37  |
| Unigene50261  | Potri.008G066000.1 | 250.7359 | 39.946  | 2.65   | Up | 0         | 0         |
| Unigene54686  | Potri.019G050600.9 | 11.0203  | 1.7563  | 2.6496 | Up | 2.11E-25  | 1.12E-24  |
| Unigene4016   | Potri.015G093200.1 | 44.5973  | 7.1135  | 2.6483 | Up | 6.47E-56  | 7.13E-55  |
| Unigene85855  | Potri.018G024500.2 | 3.4255   | 0.5467  | 2.6475 | Up | 4.67E-05  | 9.26E-05  |
| Unigene77633  | Potri.001G276700.2 | 4.3409   | 0.6928  | 2.6475 | Up | 4.67E-05  | 9.26E-05  |
| Unigene81706  | Potri.019G081100.2 | 3.9339   | 0.6279  | 2.6474 | Up | 4.67E-05  | 9.26E-05  |
| Unigene4931   | Potri.019G033000.1 | 19.3671  | 3.0912  | 2.6474 | Up | 2.17E-24  | 1.12E-23  |
| Unigene63029  | Potri.004G187700.1 | 4.8418   | 0.7728  | 2.6474 | Up | 4.67E-05  | 9.26E-05  |
| Unigene91418  | Potri.014G049800.1 | 9.5913   | 1.5309  | 2.6473 | Up | 1.02E-16  | 3.99E-16  |
| Unigene105275 | Potri.009G041700.1 | 117.2484 | 18.7317 | 2.646  | Up | 1.28E-223 | 7.55E-222 |
| Unigene8209   | Potri.006G153000.2 | 16.5864  | 2.6505  | 2.6457 | Up | 5.04E-31  | 3.15E-30  |
| Unigene9914   | Potri.013G060800.1 | 4.4924   | 0.7191  | 2.6432 | Up | 3.44E-26  | 1.87E-25  |
| Unigene4585   | Potri.001G295500.1 | 209.9295 | 33.6165 | 2.6427 | Up | 2.78E-248 | 1.90E-246 |
| Unigene15089  | Potri.008G173600.2 | 6.3893   | 1.0232  | 2.6426 | Up | 2.31E-22  | 1.11E-21  |
| Unigene47091  | Potri.014G152200.1 | 8.9038   | 1.4259  | 2.6425 | Up | 7.64E-12  | 2.41E-11  |
| Unigene36031  | Potri.007G026900.1 | 16.2363  | 2.6002  | 2.6425 | Up | 2.31E-22  | 1.11E-21  |
| Unigene37832  | Potri.004G003200.2 | 13.7322  | 2.1992  | 2.6425 | Up | 7.64E-12  | 2.41E-11  |
| Unigene66900  | Potri.001G294200.2 | 5.2702   | 0.8449  | 2.641  | Up | 3.55E-25  | 1.87E-24  |
| Unigene30529  | Potri.010G006300.1 | 5.2175   | 0.8372  | 2.6397 | Up | 2.39E-21  | 1.11E-20  |

|               |                    |          |         |        |    |           |           |
|---------------|--------------------|----------|---------|--------|----|-----------|-----------|
| Unigene51708  | Potri.012G138900.3 | 108.2042 | 17.3753 | 2.6386 | Up | 3.11E-215 | 1.76E-213 |
| Unigene90964  | Potri.010G153100.5 | 6.2321   | 1.0021  | 2.6367 | Up | 8.08E-11  | 2.42E-10  |
| Unigene47314  | Potri.003G122900.1 | 130.2476 | 20.9568 | 2.6358 | Up | 1.23E-183 | 5.79E-182 |
| Unigene1700   | Potri.019G100800.7 | 23.5833  | 3.7966  | 2.635  | Up | 1.26E-62  | 1.57E-61  |
| Unigene65851  | Potri.004G030100.1 | 5.1838   | 0.8345  | 2.635  | Up | 1.16E-13  | 3.99E-13  |
| Unigene4577   | Potri.003G113500.3 | 11.4464  | 1.8427  | 2.635  | Up | 5.79E-26  | 3.12E-25  |
| Unigene32786  | Potri.003G088500.1 | 101.8184 | 16.391  | 2.635  | Up | 0         | 0         |
| Unigene22882  | Potri.001G082800.3 | 37.2995  | 6.0152  | 2.6325 | Up | 5.29E-69  | 7.32E-68  |
| Unigene20606  | Potri.014G188100.1 | 13.7963  | 2.2251  | 2.6323 | Up | 2.09E-48  | 1.98E-47  |
| Unigene42417  | Potri.001G471700.2 | 64.6642  | 10.4406 | 2.6308 | Up | 0         | 0         |
| Unigene68029  | Potri.014G122600.1 | 7.071    | 1.1427  | 2.6295 | Up | 6.15E-24  | 3.11E-23  |
| Unigene69652  | Potri.009G069400.2 | 5.3095   | 0.858   | 2.6295 | Up | 2.66E-18  | 1.11E-17  |
| Unigene80377  | Potri.008G069000.2 | 3.008    | 0.4861  | 2.6295 | Up | 5.39E-04  | 9.53E-04  |
| Unigene86638  | Potri.005G257200.2 | 4.9078   | 0.7931  | 2.6295 | Up | 6.39E-07  | 1.49E-06  |
| Unigene46453  | Potri.004G230000.1 | 5.4566   | 0.8818  | 2.6295 | Up | 4.03E-21  | 1.86E-20  |
| Unigene62390  | Potri.015G108500.1 | 3.1148   | 0.5034  | 2.6294 | Up | 6.39E-07  | 1.49E-06  |
| Unigene51370  | Potri.014G096200.1 | 12.9512  | 2.093   | 2.6294 | Up | 1.46E-29  | 8.78E-29  |
| Unigene92289  | Potri.011G112300.1 | 3.1948   | 0.5163  | 2.6294 | Up | 6.39E-07  | 1.49E-06  |
| Unigene89852  | Potri.006G065100.1 | 4.0765   | 0.6588  | 2.6294 | Up | 6.39E-07  | 1.49E-06  |
| Unigene47581  | Potri.001G278600.1 | 9.5465   | 1.5428  | 2.6294 | Up | 4.03E-21  | 1.86E-20  |
| Unigene90211  | Potri.001G016200.1 | 3.968    | 0.6413  | 2.6293 | Up | 6.39E-07  | 1.49E-06  |
| Unigene51719  | Potri.008G093200.1 | 7.9756   | 1.2921  | 2.6259 | Up | 4.17E-20  | 1.86E-19  |
| Unigene11490  | Potri.011G046400.2 | 34.6211  | 5.611   | 2.6253 | Up | 4.47E-99  | 9.49E-98  |
| Unigene98237  | Potri.009G079700.1 | 81.4156  | 13.2025 | 2.6245 | Up | 6.67E-150 | 2.39E-148 |
| Unigene103565 | Potri.016G003500.3 | 103.3766 | 16.766  | 2.6243 | Up | 2.09E-118 | 5.55E-117 |
| Unigene93529  | Potri.008G101600.1 | 5.8398   | 0.9471  | 2.6243 | Up | 1.87E-14  | 6.64E-14  |
| Unigene10623  | Potri.014G095700.1 | 106.7078 | 17.307  | 2.6242 | Up | 0         | 0         |
| Unigene94114  | Potri.011G003400.1 | 12.898   | 2.0924  | 2.6239 | Up | 9.35E-38  | 6.95E-37  |
| Unigene68334  | Potri.002G034700.1 | 9.6556   | 1.5675  | 2.6229 | Up | 6.54E-22  | 3.10E-21  |
| Unigene10613  | Potri.003G150000.1 | 36.5361  | 5.9366  | 2.6216 | Up | 0         | 0         |
| Unigene51095  | Potri.012G002500.1 | 14.1271  | 2.2994  | 2.6191 | Up | 6.76E-21  | 3.10E-20  |
| Unigene109489 | Potri.006G092300.1 | 117.1032 | 19.0646 | 2.6188 | Up | 1.31E-95  | 2.64E-94  |
| Unigene85089  | Potri.014G153400.2 | 11.2553  | 1.833   | 2.6183 | Up | 1.96E-13  | 6.65E-13  |
| Unigene45920  | Potri.008G046200.5 | 7.5477   | 1.2292  | 2.6183 | Up | 1.96E-13  | 6.65E-13  |
| Unigene27307  | Potri.005G108000.2 | 14.5807  | 2.3746  | 2.6183 | Up | 1.96E-13  | 6.65E-13  |
| Unigene70235  | Potri.004G178800.1 | 5.4094   | 0.881   | 2.6183 | Up | 1.96E-13  | 6.65E-13  |
| Unigene11577  | Potri.006G146200.1 | 74.22    | 12.0882 | 2.6182 | Up | 8.49E-274 | 6.61E-272 |
| Unigene87198  | Potri.005G141100.5 | 14.2264  | 2.3184  | 2.6174 | Up | 4.48E-18  | 1.85E-17  |
| Unigene27114  | Potri.001G267500.1 | 89.5721  | 14.6041 | 2.6167 | Up | 3.43E-142 | 1.14E-140 |



|               |                     |          |         |        |    |           |           |
|---------------|---------------------|----------|---------|--------|----|-----------|-----------|
| Unigene36315  | Potri.001G163900.5  | 3.9706   | 0.6481  | 2.6151 | Up | 7.05E-06  | 1.51E-05  |
| Unigene82417  | Potri.013G076500.1  | 4.716    | 0.7698  | 2.615  | Up | 7.05E-06  | 1.51E-05  |
| Unigene68769  | Potri.008G168800.3  | 3.4479   | 0.5628  | 2.615  | Up | 7.05E-06  | 1.51E-05  |
| Unigene84801  | Potri.006G053800.1  | 4.3648   | 0.7125  | 2.615  | Up | 7.05E-06  | 1.51E-05  |
| Unigene5355   | Potri.003G082600.1  | 4.9733   | 0.8118  | 2.615  | Up | 1.36E-10  | 4.02E-10  |
| Unigene69627  | Potri.018G100600.3  | 3.3177   | 0.5416  | 2.6149 | Up | 1.36E-10  | 4.02E-10  |
| Unigene48879  | Potri.008G112800.1  | 13.9556  | 2.2781  | 2.6149 | Up | 1.68E-24  | 8.67E-24  |
| Unigene23147  | Potri.002G211300.1  | 31.0417  | 5.0732  | 2.6132 | Up | 3.10E-71  | 4.44E-70  |
| Unigene64249  | Potri.012G085000.1  | 6.5627   | 1.074   | 2.6113 | Up | 2.05E-12  | 6.65E-12  |
| Unigene16606  | Potri.001G142600.1  | 5.4067   | 0.8848  | 2.6113 | Up | 2.05E-12  | 6.65E-12  |
| Unigene118656 | Potri.008G126800.5  | 347.5168 | 56.8788 | 2.6111 | Up | 0         | 0         |
| Unigene61858  | Potri.019G080800.2  | 6.1941   | 1.0155  | 2.6087 | Up | 9.92E-08  | 2.46E-07  |
| Unigene4699   | Potri.002G041000.1  | 12.1256  | 1.988   | 2.6087 | Up | 3.14E-14  | 1.11E-13  |
| Unigene48142  | Potri.008G075200.1  | 169.395  | 27.7778 | 2.6084 | Up | 1.86E-274 | 1.45E-272 |
| Unigene26789  | Potri.011G129100.1  | 78.3206  | 12.8483 | 2.6078 | Up | 6.66E-130 | 1.97E-128 |
| Unigene67590  | Potri.001G061100.1  | 7.2661   | 1.1929  | 2.6067 | Up | 4.84E-16  | 1.84E-15  |
| Unigene35409  | Potri.008G060000.1  | 10.812   | 1.7754  | 2.6064 | Up | 7.08E-39  | 5.40E-38  |
| Unigene75742  | Potri.008G029300.4  | 29.7388  | 4.8874  | 2.6052 | Up | 4.47E-26  | 2.42E-25  |
| Unigene91079  | Potri.011G164400.1  | 13.2621  | 2.1829  | 2.603  | Up | 1.84E-21  | 8.61E-21  |
| Unigene109449 | Potri.009G056700.1  | 92.9886  | 15.3265 | 2.601  | Up | 1.04E-75  | 1.61E-74  |
| Unigene22330  | Potri.017G099900.1  | 65.1454  | 10.74   | 2.6007 | Up | 3.21E-298 | 2.82E-296 |
| Unigene51503  | Potri.011G041700.1  | 18.0011  | 2.9702  | 2.5995 | Up | 7.81E-17  | 3.08E-16  |
| Unigene92086  | Potri.004G158300.4  | 9.0995   | 1.5014  | 2.5995 | Up | 7.81E-17  | 3.08E-16  |
| Unigene67641  | Potri.002G198000.1  | 4.014    | 0.6653  | 2.593  | Up | 2.29E-10  | 6.67E-10  |
| Unigene92950  | Potri.001G337000.1  | 3.73     | 0.6182  | 2.593  | Up | 1.55E-08  | 4.06E-08  |
| Unigene81751  | Potri.001G163900.5  | 5.6824   | 0.9418  | 2.593  | Up | 1.08E-06  | 2.47E-06  |
| Unigene87311  | Potri.013G084900.1  | 7.7212   | 1.2798  | 2.5929 | Up | 2.29E-10  | 6.67E-10  |
| Unigene87536  | Potri.010G189500.3  | 3.0593   | 0.5071  | 2.5929 | Up | 7.92E-05  | 1.53E-04  |
| Unigene14672  | Potri.008G126800.5  | 7.4829   | 1.2403  | 2.5929 | Up | 2.29E-10  | 6.67E-10  |
| Unigene84381  | Potri.003G165200.1  | 3.4884   | 0.5782  | 2.5929 | Up | 7.92E-05  | 1.53E-04  |
| Unigene87450  | Potri.003G126700.1  | 4.6034   | 0.763   | 2.5929 | Up | 1.08E-06  | 2.47E-06  |
| Unigene68483  | Potri.002G184300.4  | 4.9989   | 0.8286  | 2.5929 | Up | 1.08E-06  | 2.47E-06  |
| Unigene93445  | Potri.001G234800.1  | 3.3557   | 0.5562  | 2.5929 | Up | 1.55E-08  | 4.06E-08  |
| Unigene100629 | Potri.001G154100.1  | 3.4147   | 0.566   | 2.5929 | Up | 7.92E-05  | 1.53E-04  |
| Unigene14638  | Potri.008G024700.1  | 4.0408   | 0.6698  | 2.5928 | Up | 7.92E-05  | 1.53E-04  |
| Unigene51602  | Potri.009G015400.12 | 124.8197 | 20.7179 | 2.5909 | Up | 0         | 0         |
| Unigene35092  | Potri.010G122500.6  | 7.5826   | 1.2614  | 2.5877 | Up | 3.19E-20  | 1.43E-19  |
| Unigene70253  | Potri.001G152400.1  | 4.4852   | 0.7461  | 2.5877 | Up | 3.19E-20  | 1.43E-19  |
| Unigene4103   | Potri.002G211800.1  | 10.1658  | 1.6912  | 2.5876 | Up | 5.44E-39  | 4.17E-38  |

|               |                    |          |         |        |    |           |           |
|---------------|--------------------|----------|---------|--------|----|-----------|-----------|
| Unigene108865 | Potri.003G109100.1 | 213.8508 | 35.5926 | 2.587  | Up | 7.29E-167 | 3.01E-165 |
| Unigene44717  | Potri.005G095300.8 | 11.5823  | 1.9292  | 2.5858 | Up | 2.31E-43  | 1.96E-42  |
| Unigene93732  | Potri.018G067400.1 | 17.2015  | 2.8658  | 2.5855 | Up | 1.43E-41  | 1.17E-40  |
| Unigene31671  | Potri.019G083100.1 | 8.7518   | 1.4592  | 2.5844 | Up | 1.29E-24  | 6.67E-24  |
| Unigene7843   | Potri.004G019600.1 | 3.2267   | 0.538   | 2.5844 | Up | 5.52E-13  | 1.84E-12  |
| Unigene80721  | Potri.003G176700.1 | 12.5326  | 2.0896  | 2.5844 | Up | 5.52E-13  | 1.84E-12  |
| Unigene51869  | Potri.009G045500.1 | 9.931    | 1.6576  | 2.5828 | Up | 8.46E-31  | 5.25E-30  |
| Unigene67945  | Potri.012G141500.2 | 4.6872   | 0.7824  | 2.5827 | Up | 3.64E-11  | 1.11E-10  |
| Unigene7385   | Potri.001G355300.2 | 28.0051  | 4.6788  | 2.5815 | Up | 3.63E-96  | 7.37E-95  |
| Unigene51055  | Potri.004G081800.5 | 5.2382   | 0.8757  | 2.5806 | Up | 2.44E-09  | 6.70E-09  |
| Unigene9395   | Potri.008G052400.2 | 9.3653   | 1.5657  | 2.5805 | Up | 2.44E-09  | 6.70E-09  |
| Unigene4593   | Potri.001G212700.1 | 12.9114  | 2.1638  | 2.577  | Up | 8.84E-14  | 3.05E-13  |
| Unigene94257  | Potri.002G041000.1 | 8.3789   | 1.4075  | 2.5736 | Up | 5.57E-27  | 3.10E-26  |
| Unigene16541  | Potri.006G245300.1 | 5.4281   | 0.9121  | 2.5732 | Up | 2.19E-16  | 8.48E-16  |
| Unigene90122  | Potri.017G057300.1 | 3.1914   | 0.5372  | 2.5707 | Up | 1.19E-05  | 2.50E-05  |
| Unigene64083  | Potri.016G084800.1 | 7.9839   | 1.344   | 2.5706 | Up | 3.85E-10  | 1.11E-09  |
| Unigene92967  | Potri.008G159700.2 | 4.5731   | 0.7698  | 2.5706 | Up | 3.85E-10  | 1.11E-09  |
| Unigene7440   | Potri.001G180000.1 | 5.0469   | 0.8496  | 2.5705 | Up | 5.52E-19  | 2.37E-18  |
| Unigene19619  | Potri.016G023100.1 | 11.0073  | 1.8547  | 2.5692 | Up | 2.36E-30  | 1.45E-29  |
| Unigene67015  | Potri.001G170000.1 | 8.1821   | 1.3789  | 2.569  | Up | 5.72E-26  | 3.08E-25  |
| Unigene64907  | Potri.018G046200.3 | 5.4297   | 0.9156  | 2.5681 | Up | 3.54E-17  | 1.41E-16  |
| Unigene37326  | Potri.011G044600.2 | 4.0428   | 0.6817  | 2.5681 | Up | 3.54E-17  | 1.41E-16  |
| Unigene44136  | Potri.002G141600.1 | 8.9302   | 1.5063  | 2.5677 | Up | 1.48E-28  | 8.63E-28  |
| Unigene41911  | Potri.010G243100.6 | 45.0307  | 7.5987  | 2.5671 | Up | 7.67E-47  | 7.01E-46  |
| Unigene14751  | Potri.010G238300.6 | 18.3522  | 3.0994  | 2.5659 | Up | 9.32E-27  | 5.15E-26  |
| Unigene14297  | Potri.T079300.1    | 3.6866   | 0.623   | 2.565  | Up | 2.61E-08  | 6.72E-08  |
| Unigene67118  | Potri.011G145900.1 | 3.0931   | 0.5227  | 2.565  | Up | 2.61E-08  | 6.72E-08  |
| Unigene48337  | Potri.006G085700.1 | 7.1514   | 1.2086  | 2.5649 | Up | 2.28E-15  | 8.44E-15  |
| Unigene35074  | Potri.002G156800.1 | 23.2694  | 3.9325  | 2.5649 | Up | 2.42E-29  | 1.44E-28  |
| Unigene31591  | Potri.007G057600.2 | 3.5      | 0.5925  | 2.5625 | Up | 6.10E-11  | 1.84E-10  |
| Unigene66371  | Potri.003G162300.2 | 4.9264   | 0.834   | 2.5624 | Up | 6.10E-11  | 1.84E-10  |
| Unigene47560  | Potri.T170400.1    | 78.9162  | 13.3951 | 2.5586 | Up | 1.22E-63  | 1.55E-62  |
| Unigene29763  | Potri.010G226000.5 | 139.321  | 23.6631 | 2.5577 | Up | 6.72E-147 | 2.35E-145 |
| Unigene94475  | Potri.019G033200.6 | 7.2493   | 1.2315  | 2.5574 | Up | 2.75E-34  | 1.87E-33  |
| Unigene33831  | Potri.015G069000.2 | 68.2049  | 11.5963 | 2.5562 | Up | 2.34E-88  | 4.29E-87  |
| Unigene54795  | Potri.008G160900.1 | 3.0547   | 0.5196  | 2.5556 | Up | 1.82E-06  | 4.11E-06  |
| Unigene36429  | Potri.012G099600.1 | 13.4349  | 2.2854  | 2.5555 | Up | 9.70E-12  | 3.04E-11  |
| Unigene91019  | Potri.006G216500.3 | 15.8269  | 2.6923  | 2.5555 | Up | 9.80E-25  | 5.09E-24  |
| Unigene25128  | Potri.003G148100.1 | 4.8875   | 0.8314  | 2.5555 | Up | 1.82E-06  | 4.11E-06  |

|              |                    |          |         |        |    |           |           |
|--------------|--------------------|----------|---------|--------|----|-----------|-----------|
| Unigene88157 | Potri.002G154400.1 | 4.3213   | 0.7351  | 2.5555 | Up | 1.82E-06  | 4.11E-06  |
| Unigene94222 | Potri.002G118300.3 | 3.5214   | 0.599   | 2.5555 | Up | 9.70E-12  | 3.04E-11  |
| Unigene65623 | Potri.015G045300.1 | 7.1405   | 1.2147  | 2.5554 | Up | 9.70E-12  | 3.04E-11  |
| Unigene14073 | Potri.006G101400.1 | 5.1541   | 0.8768  | 2.5554 | Up | 1.82E-06  | 4.11E-06  |
| Unigene33594 | Potri.006G063100.1 | 6.1447   | 1.0453  | 2.5554 | Up | 4.09E-09  | 1.11E-08  |
| Unigene4806  | Potri.013G039200.1 | 58.6517  | 9.9924  | 2.5533 | Up | 1.52E-120 | 4.12E-119 |
| Unigene49235 | Potri.013G014800.4 | 10.8307  | 1.8455  | 2.553  | Up | 4.13E-28  | 2.38E-27  |
| Unigene53190 | Potri.007G065000.2 | 41.9809  | 7.1585  | 2.552  | Up | 3.17E-39  | 2.44E-38  |
| Unigene4500  | Potri.018G024300.4 | 7.0285   | 1.1996  | 2.5507 | Up | 3.81E-15  | 1.40E-14  |
| Unigene40788 | Potri.010G145100.1 | 7.7548   | 1.3238  | 2.5504 | Up | 5.19E-40  | 4.07E-39  |
| Unigene48035 | Potri.005G197000.2 | 53.4699  | 9.1365  | 2.549  | Up | 4.11E-102 | 9.03E-101 |
| Unigene63673 | Potri.002G024900.2 | 4.4171   | 0.7554  | 2.5478 | Up | 6.45E-10  | 1.83E-09  |
| Unigene94279 | Potri.006G239900.2 | 4.7287   | 0.8094  | 2.5465 | Up | 6.13E-16  | 2.32E-15  |
| Unigene3184  | Potri.008G009800.7 | 9.6889   | 1.6593  | 2.5458 | Up | 5.81E-95  | 1.16E-93  |
| Unigene67648 | Potri.018G104100.1 | 4.1081   | 0.7041  | 2.5446 | Up | 2.47E-13  | 8.38E-13  |
| Unigene70062 | Potri.008G100700.3 | 3.1622   | 0.542   | 2.5446 | Up | 2.81E-07  | 6.75E-07  |
| Unigene93432 | Potri.001G142600.2 | 4.4604   | 0.7661  | 2.5416 | Up | 1.02E-10  | 3.04E-10  |
| Unigene90437 | Potri.014G088700.1 | 15.9158  | 2.7351  | 2.5408 | Up | 1.68E-23  | 8.36E-23  |
| Unigene65553 | Potri.008G094800.1 | 6.3041   | 1.0848  | 2.5389 | Up | 6.54E-21  | 3.00E-20  |
| Unigene24863 | Potri.005G198900.1 | 73.4514  | 12.6394 | 2.5389 | Up | 2.02E-156 | 7.64E-155 |
| Unigene47979 | Potri.003G006500.4 | 197.5961 | 34.0218 | 2.538  | Up | 1.82E-233 | 1.14E-231 |
| Unigene90050 | Potri.016G035200.2 | 5.0134   | 0.8642  | 2.5364 | Up | 4.37E-08  | 1.11E-07  |
| Unigene14909 | Potri.009G082600.1 | 4.7286   | 0.8151  | 2.5364 | Up | 2.57E-18  | 1.08E-17  |
| Unigene94370 | Potri.009G041200.4 | 6.9      | 1.1894  | 2.5364 | Up | 4.43E-25  | 2.33E-24  |
| Unigene92861 | Potri.007G115800.2 | 3.6497   | 0.6291  | 2.5364 | Up | 4.37E-08  | 1.11E-07  |
| Unigene63173 | Potri.004G059000.1 | 3.3185   | 0.572   | 2.5364 | Up | 1.34E-04  | 2.53E-04  |
| Unigene57990 | Potri.003G159200.2 | 4.5048   | 0.7765  | 2.5364 | Up | 1.62E-11  | 5.02E-11  |
| Unigene74125 | Potri.001G134800.2 | 4.3574   | 0.7511  | 2.5364 | Up | 1.34E-04  | 2.53E-04  |
| Unigene65121 | Potri.010G232000.1 | 3.8061   | 0.6561  | 2.5363 | Up | 1.34E-04  | 2.53E-04  |
| Unigene75990 | Potri.010G186900.2 | 4.1629   | 0.7176  | 2.5363 | Up | 1.34E-04  | 2.53E-04  |
| Unigene85695 | Potri.006G245300.1 | 3.1935   | 0.5505  | 2.5363 | Up | 1.34E-04  | 2.53E-04  |
| Unigene94259 | Potri.005G093000.1 | 3.3704   | 0.581   | 2.5363 | Up | 1.62E-11  | 5.02E-11  |
| Unigene83310 | Potri.002G162500.3 | 3.4794   | 0.5998  | 2.5363 | Up | 1.34E-04  | 2.53E-04  |
| Unigene78173 | Potri.001G276700.2 | 3.968    | 0.684   | 2.5363 | Up | 1.34E-04  | 2.53E-04  |
| Unigene63694 | Potri.001G239900.4 | 4.2644   | 0.7351  | 2.5363 | Up | 1.62E-11  | 5.02E-11  |
| Unigene13988 | Potri.002G001300.1 | 11.3085  | 1.9573  | 2.5305 | Up | 1.72E-42  | 1.43E-41  |
| Unigene91461 | Potri.014G149000.1 | 4.9497   | 0.857   | 2.53   | Up | 6.85E-09  | 1.83E-08  |
| Unigene49749 | Potri.008G058800.1 | 9.5378   | 1.6514  | 2.53   | Up | 1.65E-16  | 6.41E-16  |
| Unigene92653 | Potri.009G169100.1 | 4.2369   | 0.7336  | 2.5299 | Up | 6.85E-09  | 1.83E-08  |

|               |                    |          |         |        |    |           |           |
|---------------|--------------------|----------|---------|--------|----|-----------|-----------|
| Unigene46897  | Potri.009G062400.1 | 27.3639  | 4.738   | 2.5299 | Up | 4.54E-24  | 2.31E-23  |
| Unigene67986  | Potri.009G039300.1 | 3.9872   | 0.6928  | 2.5249 | Up | 2.01E-05  | 4.12E-05  |
| Unigene93401  | Potri.008G009300.1 | 4.043    | 0.7025  | 2.5249 | Up | 1.08E-09  | 3.02E-09  |
| Unigene84096  | Potri.018G137500.1 | 4.2047   | 0.7306  | 2.5248 | Up | 2.01E-05  | 4.12E-05  |
| Unigene77827  | Potri.016G009700.1 | 4.9626   | 0.8623  | 2.5248 | Up | 2.01E-05  | 4.12E-05  |
| Unigene36345  | Potri.011G109300.5 | 8.2006   | 1.425   | 2.5248 | Up | 1.08E-09  | 3.02E-09  |
| Unigene68194  | Potri.005G201800.1 | 4.0858   | 0.71    | 2.5247 | Up | 2.01E-05  | 4.12E-05  |
| Unigene41999  | Potri.001G164700.5 | 43.9838  | 7.6459  | 2.5242 | Up | 7.62E-73  | 1.12E-71  |
| Unigene59608  | Potri.008G100100.2 | 6.2681   | 1.0938  | 2.5187 | Up | 1.81E-20  | 8.21E-20  |
| Unigene115977 | Potri.017G090600.1 | 342.935  | 59.8812 | 2.5178 | Up | 0         | 0         |
| Unigene12254  | Potri.015G061900.3 | 13.5042  | 2.3579  | 2.5178 | Up | 2.95E-40  | 2.33E-39  |
| Unigene57441  | Potri.005G074400.3 | 5.391    | 0.9418  | 2.5171 | Up | 3.05E-06  | 6.76E-06  |
| Unigene19411  | Potri.014G168000.1 | 26.0393  | 4.5493  | 2.517  | Up | 4.19E-36  | 2.99E-35  |
| Unigene69633  | Potri.013G046400.1 | 7.2445   | 1.2657  | 2.517  | Up | 2.71E-11  | 8.30E-11  |
| Unigene55445  | Potri.008G146800.3 | 4.4663   | 0.7803  | 2.517  | Up | 3.05E-06  | 6.76E-06  |
| Unigene9009   | Potri.001G387100.3 | 3.7502   | 0.6552  | 2.517  | Up | 2.71E-11  | 8.30E-11  |
| Unigene93336  | Potri.001G235300.1 | 12.2565  | 2.1413  | 2.517  | Up | 3.25E-26  | 1.76E-25  |
| Unigene89168  | Potri.011G140100.5 | 3.9544   | 0.6909  | 2.5169 | Up | 3.05E-06  | 6.76E-06  |
| Unigene94181  | Potri.003G045200.1 | 5.3012   | 0.9262  | 2.5169 | Up | 2.74E-16  | 1.06E-15  |
| Unigene23223  | Potri.002G182400.2 | 15.8316  | 2.7683  | 2.5157 | Up | 5.29E-27  | 2.94E-26  |
| Unigene61374  | Potri.008G002500.3 | 4.8062   | 0.8409  | 2.5149 | Up | 4.42E-17  | 1.76E-16  |
| Unigene7165   | Potri.010G005000.4 | 7.7305   | 1.3534  | 2.514  | Up | 4.31E-12  | 1.37E-11  |
| Unigene116369 | Potri.001G118900.3 | 39.7705  | 6.9722  | 2.512  | Up | 1.53E-46  | 1.39E-45  |
| Unigene32494  | Potri.003G074400.3 | 64.7834  | 11.3606 | 2.5116 | Up | 6.00E-308 | 5.48E-306 |
| Unigene51646  | Potri.018G067300.1 | 12.9345  | 2.2685  | 2.5114 | Up | 6.89E-13  | 2.28E-12  |
| Unigene9095   | Potri.014G160000.1 | 6.0984   | 1.0696  | 2.5114 | Up | 6.89E-13  | 2.28E-12  |
| Unigene88928  | Potri.006G083500.3 | 4.6624   | 0.8177  | 2.5114 | Up | 4.70E-07  | 1.11E-06  |
| Unigene87777  | Potri.003G172100.2 | 4.9965   | 0.8763  | 2.5114 | Up | 4.70E-07  | 1.11E-06  |
| Unigene37377  | Potri.002G104400.2 | 17.3705  | 3.0465  | 2.5114 | Up | 1.15E-18  | 4.88E-18  |
| Unigene77114  | Potri.001G333100.1 | 7.0038   | 1.2284  | 2.5114 | Up | 4.70E-07  | 1.11E-06  |
| Unigene46900  | Potri.T165400.1    | 91.2857  | 16.0137 | 2.5111 | Up | 4.45E-88  | 8.13E-87  |
| Unigene111669 | Potri.013G079700.8 | 152.6901 | 26.8471 | 2.5078 | Up | 4.05E-129 | 1.19E-127 |
| Unigene92656  | Potri.017G072100.2 | 3.7073   | 0.6521  | 2.5072 | Up | 7.31E-08  | 1.83E-07  |
| Unigene5867   | Potri.005G071700.1 | 4.0706   | 0.716   | 2.5072 | Up | 7.31E-08  | 1.83E-07  |
| Unigene56248  | Potri.001G282900.2 | 5.3755   | 0.9455  | 2.5072 | Up | 7.31E-08  | 1.83E-07  |
| Unigene116472 | Potri.014G064000.1 | 338.9597 | 59.6499 | 2.5065 | Up | 0         | 0         |
| Unigene52893  | Potri.005G230500.7 | 10.2854  | 1.8109  | 2.5058 | Up | 1.16E-35  | 8.15E-35  |
| Unigene8615   | Potri.001G148800.1 | 6.0707   | 1.0691  | 2.5055 | Up | 2.84E-15  | 1.05E-14  |
| Unigene66825  | Potri.009G112100.4 | 6.3697   | 1.1218  | 2.5054 | Up | 2.84E-15  | 1.05E-14  |

|               |                    |          |         |        |    |           |           |
|---------------|--------------------|----------|---------|--------|----|-----------|-----------|
| Unigene47466  | Potri.018G066100.2 | 8.5657   | 1.5101  | 2.5039 | Up | 4.57E-16  | 1.74E-15  |
| Unigene88998  | Potri.001G288000.5 | 5.9291   | 1.0453  | 2.5039 | Up | 1.14E-08  | 3.01E-08  |
| Unigene59943  | Potri.019G019100.1 | 3.2409   | 0.5714  | 2.5038 | Up | 1.14E-08  | 3.01E-08  |
| Unigene27915  | Potri.018G038100.1 | 27.728   | 4.8903  | 2.5033 | Up | 8.27E-39  | 6.30E-38  |
| Unigene15573  | Potri.008G126800.5 | 245.0467 | 43.2295 | 2.503  | Up | 5.39E-288 | 4.54E-286 |
| Unigene39452  | Potri.008G159000.3 | 40.1444  | 7.0835  | 2.5027 | Up | 1.24E-85  | 2.20E-84  |
| Unigene40194  | Potri.008G053900.3 | 15.212   | 2.6852  | 2.5021 | Up | 5.52E-25  | 2.89E-24  |
| Unigene25189  | Potri.013G009500.1 | 58.6338  | 10.3507 | 2.502  | Up | 1.59E-56  | 1.77E-55  |
| Unigene25329  | Potri.005G215400.1 | 6.5759   | 1.1614  | 2.5013 | Up | 1.80E-09  | 4.98E-09  |
| Unigene30771  | Potri.001G104700.1 | 6.8739   | 1.2141  | 2.5012 | Up | 1.80E-09  | 4.98E-09  |
| Unigene51381  | Potri.014G141500.3 | 20.4931  | 3.6213  | 2.5006 | Up | 1.46E-26  | 8.02E-26  |
| Unigene56240  | Potri.008G023800.1 | 7.8341   | 1.3857  | 2.4992 | Up | 3.10E-19  | 1.34E-18  |
| Unigene88140  | Potri.003G052800.1 | 7.6424   | 1.3518  | 2.4991 | Up | 2.85E-10  | 8.25E-10  |
| Unigene119130 | Potri.016G072200.1 | 323.4531 | 57.2708 | 2.4977 | Up | 0         | 0         |
| Unigene51076  | Potri.004G178000.2 | 14.2558  | 2.5247  | 2.4974 | Up | 8.13E-21  | 3.72E-20  |
| Unigene14757  | Potri.004G168500.4 | 6.1883   | 1.096   | 2.4973 | Up | 4.51E-11  | 1.37E-10  |
| Unigene89263  | Potri.001G058700.1 | 7.7575   | 1.3739  | 2.4973 | Up | 4.51E-11  | 1.37E-10  |
| Unigene42702  | Potri.004G197700.1 | 28.4965  | 5.0517  | 2.4959 | Up | 8.48E-126 | 2.42E-124 |
| Unigene24066  | Potri.008G187700.1 | 13.0315  | 2.3106  | 2.4957 | Up | 2.38E-75  | 3.65E-74  |
| Unigene91877  | Potri.008G008000.2 | 7.1568   | 1.27    | 2.4945 | Up | 1.15E-12  | 3.76E-12  |
| Unigene30317  | Potri.008G075200.1 | 110.8827 | 19.7017 | 2.4926 | Up | 3.28E-102 | 7.22E-101 |
| Unigene52830  | Potri.001G377300.1 | 11.9578  | 2.1275  | 2.4907 | Up | 7.59E-16  | 2.87E-15  |
| Unigene48017  | Potri.004G102500.2 | 157.3503 | 28.0054 | 2.4902 | Up | 2.58E-270 | 1.98E-268 |
| Unigene15893  | Potri.018G110800.1 | 182.3922 | 32.4681 | 2.4899 | Up | 8.63E-276 | 6.80E-274 |
| Unigene49753  | Potri.016G128800.1 | 10.153   | 1.8076  | 2.4898 | Up | 1.21E-32  | 7.91E-32  |
| Unigene66810  | Potri.006G119800.4 | 7.1299   | 1.2697  | 2.4894 | Up | 1.97E-17  | 7.96E-17  |
| Unigene50885  | Potri.014G147100.1 | 6.2166   | 1.1075  | 2.4888 | Up | 3.18E-18  | 1.33E-17  |
| Unigene22750  | Potri.005G173100.2 | 11.6817  | 2.0818  | 2.4883 | Up | 4.44E-54  | 4.70E-53  |
| Unigene15815  | Potri.001G274300.2 | 59.0794  | 10.5381 | 2.487  | Up | 3.85E-61  | 4.67E-60  |
| Unigene27896  | Potri.003G142700.2 | 45.6202  | 8.1401  | 2.4866 | Up | 2.80E-64  | 3.59E-63  |
| Unigene37080  | Potri.006G259400.6 | 20.8209  | 3.7186  | 2.4852 | Up | 4.02E-26  | 2.18E-25  |
| Unigene47880  | Potri.005G220900.2 | 198.077  | 35.4381 | 2.4827 | Up | 1.31E-254 | 9.23E-253 |
| Unigene39226  | Potri.008G068200.1 | 32.0483  | 5.7407  | 2.4809 | Up | 2.69E-110 | 6.52E-109 |
| Unigene89530  | Potri.005G149800.1 | 3.1257   | 0.5612  | 2.4776 | Up | 3.36E-05  | 6.76E-05  |
| Unigene47831  | Potri.019G120700.1 | 4.7835   | 0.8589  | 2.4775 | Up | 1.91E-12  | 6.18E-12  |
| Unigene67414  | Potri.015G065400.4 | 4.1831   | 0.7511  | 2.4775 | Up | 1.22E-07  | 3.01E-07  |
| Unigene53528  | Potri.013G009800.1 | 11.8926  | 2.1354  | 2.4775 | Up | 4.74E-10  | 1.36E-09  |
| Unigene104331 | Potri.012G138900.3 | 3.2201   | 0.5782  | 2.4775 | Up | 5.11E-06  | 1.11E-05  |
| Unigene3864   | Potri.012G053700.3 | 7.2193   | 1.2963  | 2.4775 | Up | 7.86E-07  | 1.83E-06  |

|               |                    |          |         |        |    |           |           |
|---------------|--------------------|----------|---------|--------|----|-----------|-----------|
| Unigene35530  | Potri.011G083100.4 | 7.9361   | 1.425   | 2.4775 | Up | 3.00E-09  | 8.19E-09  |
| Unigene37831  | Potri.010G223000.1 | 37.4683  | 6.7278  | 2.4775 | Up | 1.25E-30  | 7.71E-30  |
| Unigene93947  | Potri.010G061400.1 | 4.2165   | 0.7571  | 2.4775 | Up | 1.19E-11  | 3.73E-11  |
| Unigene15073  | Potri.005G247400.1 | 7.2193   | 1.2963  | 2.4775 | Up | 1.22E-07  | 3.01E-07  |
| Unigene46495  | Potri.004G179000.2 | 4.7786   | 0.858   | 2.4775 | Up | 5.11E-06  | 1.11E-05  |
| Unigene68164  | Potri.002G254300.2 | 4.3759   | 0.7857  | 2.4775 | Up | 1.91E-12  | 6.18E-12  |
| Unigene54750  | Potri.001G329900.1 | 3.4787   | 0.6246  | 2.4775 | Up | 5.11E-06  | 1.11E-05  |
| Unigene93671  | Potri.001G032900.1 | 6.5184   | 1.1704  | 2.4775 | Up | 1.26E-15  | 4.72E-15  |
| Unigene37973  | Potri.001G019100.2 | 11.9359  | 2.1432  | 2.4775 | Up | 7.51E-11  | 2.25E-10  |
| Unigene83553  | Potri.014G089200.1 | 4.1444   | 0.7442  | 2.4774 | Up | 3.36E-05  | 6.76E-05  |
| Unigene67192  | Potri.010G174700.1 | 3.5808   | 0.643   | 2.4774 | Up | 2.25E-04  | 4.15E-04  |
| Unigene64840  | Potri.010G000800.1 | 3.9964   | 0.7176  | 2.4774 | Up | 3.36E-05  | 6.76E-05  |
| Unigene82160  | Potri.008G209000.2 | 12.0972  | 2.1722  | 2.4774 | Up | 1.91E-12  | 6.18E-12  |
| Unigene89330  | Potri.006G153400.1 | 3.1699   | 0.5692  | 2.4774 | Up | 3.36E-05  | 6.76E-05  |
| Unigene77207  | Potri.005G241100.4 | 8.7573   | 1.5725  | 2.4774 | Up | 1.91E-08  | 4.97E-08  |
| Unigene67534  | Potri.002G063700.3 | 8.1086   | 1.456   | 2.4774 | Up | 3.05E-13  | 1.03E-12  |
| Unigene86410  | Potri.002G056600.4 | 8.1786   | 1.4686  | 2.4774 | Up | 4.74E-10  | 1.36E-09  |
| Unigene85483  | Potri.001G161800.1 | 3.0975   | 0.5562  | 2.4774 | Up | 2.25E-04  | 4.15E-04  |
| Unigene81116  | Potri.001G101300.1 | 3.5523   | 0.6379  | 2.4774 | Up | 2.25E-04  | 4.15E-04  |
| Unigene94419  | Potri.001G072500.1 | 3.8549   | 0.6922  | 2.4774 | Up | 1.26E-15  | 4.72E-15  |
| Unigene67037  | Potri.007G049000.6 | 3.4832   | 0.6255  | 2.4773 | Up | 7.51E-11  | 2.25E-10  |
| Unigene114854 | Potri.010G071800.1 | 172.7629 | 31.0456 | 2.4763 | Up | 3.86E-169 | 1.62E-167 |
| Unigene1083   | Potri.003G081200.1 | 21.3836  | 3.8494  | 2.4738 | Up | 3.33E-53  | 3.48E-52  |
| Unigene50718  | Potri.003G164700.1 | 16.6169  | 2.9928  | 2.4731 | Up | 1.73E-87  | 3.14E-86  |
| Unigene114485 | Potri.014G098100.1 | 167.7098 | 30.2133 | 2.4727 | Up | 7.08E-160 | 2.75E-158 |
| Unigene13398  | Potri.006G059600.3 | 24.425   | 4.4009  | 2.4725 | Up | 1.10E-114 | 2.79E-113 |
| Unigene40     | Potri.011G029300.1 | 67.0174  | 12.0884 | 2.4709 | Up | 0         | 0         |
| Unigene44454  | Potri.006G130300.2 | 10.6925  | 1.9289  | 2.4707 | Up | 1.27E-29  | 7.60E-29  |
| Unigene103801 | Potri.001G274300.1 | 60.7408  | 10.9596 | 2.4705 | Up | 2.44E-55  | 2.65E-54  |
| Unigene30472  | Potri.001G161900.2 | 8.4225   | 1.5198  | 2.4704 | Up | 4.76E-28  | 2.73E-27  |
| Unigene63436  | Potri.001G277700.2 | 7.6911   | 1.389   | 2.4691 | Up | 4.17E-24  | 2.12E-23  |
| Unigene115978 | Potri.010G060900.2 | 186.6204 | 33.708  | 2.4689 | Up | 1.76E-199 | 9.15E-198 |
| Unigene14223  | Potri.001G071800.1 | 15.931   | 2.8777  | 2.4688 | Up | 2.57E-23  | 1.27E-22  |
| Unigene25078  | Potri.003G070600.2 | 117.1206 | 21.1642 | 2.4683 | Up | 2.14E-185 | 1.02E-183 |
| Unigene14704  | Potri.006G153000.2 | 48.6655  | 8.7959  | 2.468  | Up | 8.80E-81  | 1.46E-79  |
| Unigene92211  | Potri.003G006500.4 | 11.0607  | 2.0006  | 2.4669 | Up | 2.29E-19  | 9.96E-19  |
| Unigene68399  | Potri.001G228300.1 | 3.6008   | 0.6515  | 2.4665 | Up | 1.42E-18  | 5.97E-18  |
| Unigene2458   | Potri.001G184200.1 | 10.519   | 1.9052  | 2.465  | Up | 1.21E-76  | 1.88E-75  |
| Unigene16177  | Potri.015G065800.1 | 44.0452  | 7.98    | 2.4645 | Up | 6.47E-45  | 5.67E-44  |

|              |                    |         |         |        |    |           |           |
|--------------|--------------------|---------|---------|--------|----|-----------|-----------|
| Unigene17330 | Potri.015G048800.4 | 12.4969 | 2.2669  | 2.4628 | Up | 4.84E-27  | 2.69E-26  |
| Unigene40413 | Potri.014G113500.1 | 29.495  | 5.3507  | 2.4627 | Up | 2.05E-39  | 1.58E-38  |
| Unigene2620  | Potri.001G347600.1 | 55.113  | 10.0013 | 2.4622 | Up | 3.51E-87  | 6.34E-86  |
| Unigene27833 | Potri.005G217200.1 | 29.8726 | 5.4232  | 2.4616 | Up | 1.27E-48  | 1.20E-47  |
| Unigene9176  | Potri.003G122900.1 | 74.7214 | 13.5707 | 2.461  | Up | 4.80E-160 | 1.87E-158 |
| Unigene3525  | Potri.015G085800.1 | 10.3888 | 1.8879  | 2.4602 | Up | 3.16E-12  | 1.02E-11  |
| Unigene79417 | Potri.010G216200.1 | 12.7928 | 2.3248  | 2.4602 | Up | 3.16E-12  | 1.02E-11  |
| Unigene42078 | Potri.T173500.1    | 6.1588  | 1.1214  | 2.4573 | Up | 1.25E-10  | 3.69E-10  |
| Unigene46352 | Potri.007G027600.2 | 11.7701 | 2.1432  | 2.4573 | Up | 1.25E-10  | 3.69E-10  |
| Unigene69948 | Potri.004G217200.3 | 6.3752  | 1.1618  | 2.4561 | Up | 1.30E-27  | 7.38E-27  |
| Unigene15925 | Potri.017G036000.1 | 3.4884  | 0.636   | 2.4555 | Up | 7.87E-10  | 2.22E-09  |
| Unigene33686 | Potri.003G006500.4 | 98.0822 | 17.8835 | 2.4554 | Up | 3.42E-261 | 2.51E-259 |
| Unigene1942  | Potri.001G076100.1 | 8.7684  | 1.5987  | 2.4554 | Up | 2.34E-18  | 9.81E-18  |
| Unigene42232 | Potri.008G126900.2 | 14.7097 | 2.6884  | 2.4519 | Up | 5.57E-16  | 2.12E-15  |
| Unigene1792  | Potri.004G132600.1 | 14.4556 | 2.6433  | 2.4512 | Up | 5.90E-58  | 6.76E-57  |
| Unigene84448 | Potri.006G132800.1 | 7.1111  | 1.301   | 2.4505 | Up | 3.17E-08  | 8.14E-08  |
| Unigene50942 | Potri.005G235200.4 | 6.7817  | 1.2407  | 2.4505 | Up | 3.46E-15  | 1.27E-14  |
| Unigene64006 | Potri.002G135100.1 | 5.553   | 1.0159  | 2.4505 | Up | 3.17E-08  | 8.14E-08  |
| Unigene13107 | Potri.016G073100.3 | 8.935   | 1.6347  | 2.4504 | Up | 5.72E-29  | 3.37E-28  |
| Unigene49789 | Potri.010G148300.1 | 49.9761 | 9.1525  | 2.449  | Up | 9.27E-99  | 1.96E-97  |
| Unigene55746 | Potri.005G181700.3 | 4.0487  | 0.7425  | 2.447  | Up | 2.03E-07  | 4.92E-07  |
| Unigene60395 | Potri.001G040900.1 | 4.8428  | 0.8881  | 2.447  | Up | 2.03E-07  | 4.92E-07  |
| Unigene184   | Potri.006G016200.2 | 65.0366 | 11.934  | 2.4462 | Up | 2.59E-283 | 2.11E-281 |
| Unigene93824 | Potri.012G038900.6 | 7.7231  | 1.4176  | 2.4457 | Up | 6.26E-19  | 2.68E-18  |
| Unigene70234 | Potri.017G013300.1 | 8.4563  | 1.5537  | 2.4443 | Up | 3.87E-18  | 1.61E-17  |
| Unigene14338 | Potri.001G019100.2 | 8.0732  | 1.4833  | 2.4443 | Up | 3.87E-18  | 1.61E-17  |
| Unigene54475 | Potri.015G094200.1 | 5.184   | 0.9535  | 2.4428 | Up | 1.31E-06  | 2.98E-06  |
| Unigene65650 | Potri.013G125900.1 | 3.8137  | 0.7015  | 2.4427 | Up | 1.31E-06  | 2.98E-06  |
| Unigene24882 | Potri.006G117500.1 | 3.9313  | 0.7231  | 2.4427 | Up | 5.24E-12  | 1.66E-11  |
| Unigene95455 | Potri.004G034100.2 | 21.9514 | 4.0377  | 2.4427 | Up | 2.40E-17  | 9.64E-17  |
| Unigene70304 | Potri.001G098900.1 | 4.4716  | 0.8225  | 2.4427 | Up | 5.24E-12  | 1.66E-11  |
| Unigene82525 | Potri.007G080900.4 | 5.837   | 1.0737  | 2.4426 | Up | 1.31E-06  | 2.98E-06  |
| Unigene8804  | Potri.004G188200.1 | 4.111   | 0.7562  | 2.4426 | Up | 5.24E-12  | 1.66E-11  |
| Unigene91094 | Potri.002G090700.4 | 3.776   | 0.6946  | 2.4426 | Up | 1.31E-06  | 2.98E-06  |
| Unigene30399 | Potri.015G077400.1 | 4.6833  | 0.8619  | 2.4419 | Up | 9.30E-38  | 6.92E-37  |
| Unigene48296 | Potri.001G121400.3 | 14.5874 | 2.6856  | 2.4414 | Up | 7.14E-22  | 3.38E-21  |
| Unigene44773 | Potri.005G083000.1 | 10.5285 | 1.939   | 2.4409 | Up | 1.11E-31  | 7.03E-31  |
| Unigene65406 | Potri.015G004600.1 | 8.6956  | 1.6025  | 2.44   | Up | 3.29E-11  | 1.00E-10  |
| Unigene52641 | Potri.002G256900.4 | 14.7644 | 2.7209  | 2.44   | Up | 4.40E-21  | 2.03E-20  |

|              |                    |         |         |        |    |           |           |
|--------------|--------------------|---------|---------|--------|----|-----------|-----------|
| Unigene24023 | Potri.018G120400.1 | 31.599  | 5.8239  | 2.4398 | Up | 3.18E-84  | 5.53E-83  |
| Unigene39289 | Potri.001G056400.1 | 18.4862 | 3.4075  | 2.4397 | Up | 3.52E-45  | 3.10E-44  |
| Unigene42679 | Potri.019G078300.1 | 9.0789  | 1.6758  | 2.4377 | Up | 4.89E-75  | 7.44E-74  |
| Unigene90555 | Potri.015G005700.1 | 3.3821  | 0.6246  | 2.4369 | Up | 8.52E-06  | 1.81E-05  |
| Unigene58572 | Potri.013G059500.3 | 3.1232  | 0.5768  | 2.4369 | Up | 8.52E-06  | 1.81E-05  |
| Unigene91610 | Potri.011G000900.1 | 3.0431  | 0.562   | 2.4369 | Up | 8.52E-06  | 1.81E-05  |
| Unigene94127 | Potri.001G129800.1 | 6.8982  | 1.274   | 2.4369 | Up | 1.68E-19  | 7.32E-19  |
| Unigene92684 | Potri.016G117100.2 | 15.7921 | 2.9167  | 2.4368 | Up | 1.56E-28  | 9.06E-28  |
| Unigene86298 | Potri.014G125500.4 | 4.3516  | 0.8037  | 2.4368 | Up | 8.52E-06  | 1.81E-05  |
| Unigene59484 | Potri.014G101900.1 | 3.795   | 0.7009  | 2.4368 | Up | 8.52E-06  | 1.81E-05  |
| Unigene86275 | Potri.014G081000.2 | 4.3516  | 0.8037  | 2.4368 | Up | 8.52E-06  | 1.81E-05  |
| Unigene66388 | Potri.007G108400.1 | 3.161   | 0.5838  | 2.4368 | Up | 8.52E-06  | 1.81E-05  |
| Unigene52281 | Potri.005G081600.1 | 5.943   | 1.0976  | 2.4368 | Up | 5.72E-15  | 2.08E-14  |
| Unigene63785 | Potri.001G399700.1 | 3.4175  | 0.6312  | 2.4368 | Up | 2.07E-10  | 6.04E-10  |
| Unigene69259 | Potri.003G012400.3 | 3.2967  | 0.6089  | 2.4367 | Up | 8.52E-06  | 1.81E-05  |
| Unigene29624 | Potri.002G236000.1 | 21.4661 | 3.966   | 2.4363 | Up | 1.03E-63  | 1.31E-62  |
| Unigene34133 | Potri.014G081300.2 | 8.1261  | 1.5015  | 2.4362 | Up | 9.51E-46  | 8.48E-45  |
| Unigene18540 | Potri.018G110800.1 | 17.0173 | 3.1445  | 2.4361 | Up | 9.51E-46  | 8.48E-45  |
| Unigene18929 | Potri.009G069300.1 | 4.7281  | 0.8747  | 2.4344 | Up | 3.56E-14  | 1.25E-13  |
| Unigene37092 | Potri.003G138000.2 | 5.495   | 1.0166  | 2.4344 | Up | 3.56E-14  | 1.25E-13  |
| Unigene24904 | Potri.010G187600.1 | 6.2808  | 1.1624  | 2.4338 | Up | 1.91E-22  | 9.22E-22  |
| Unigene7124  | Potri.010G073900.1 | 15.4509 | 2.8611  | 2.433  | Up | 6.40E-18  | 2.63E-17  |
| Unigene24799 | Potri.004G154600.1 | 7.6025  | 1.4078  | 2.433  | Up | 1.30E-09  | 3.64E-09  |
| Unigene44184 | Potri.001G172400.3 | 45.4761 | 8.4231  | 2.4327 | Up | 3.84E-180 | 1.75E-178 |
| Unigene31791 | Potri.007G040300.1 | 7.7713  | 1.44    | 2.4321 | Up | 8.06E-74  | 1.20E-72  |
| Unigene91234 | Potri.010G058700.1 | 8.44    | 1.5644  | 2.4316 | Up | 2.22E-13  | 7.53E-13  |
| Unigene69534 | Potri.001G351800.3 | 8.0484  | 1.4918  | 2.4316 | Up | 2.22E-13  | 7.53E-13  |
| Unigene16967 | Potri.012G078900.2 | 59.213  | 10.9792 | 2.4311 | Up | 2.66E-115 | 6.82E-114 |
| Unigene2642  | Potri.002G013200.1 | 91.4932 | 16.9877 | 2.4292 | Up | 6.29E-178 | 2.81E-176 |
| Unigene83246 | Potri.019G036800.1 | 4.0361  | 0.7497  | 2.4286 | Up | 5.62E-05  | 1.10E-04  |
| Unigene91855 | Potri.013G097000.1 | 12.4618 | 2.3148  | 2.4286 | Up | 4.48E-20  | 2.00E-19  |
| Unigene60409 | Potri.012G143500.1 | 3.0299  | 0.5628  | 2.4286 | Up | 5.62E-05  | 1.10E-04  |
| Unigene10120 | Potri.010G109900.3 | 15.516  | 2.8821  | 2.4286 | Up | 1.58E-27  | 8.90E-27  |
| Unigene14860 | Potri.010G198500.1 | 7.6715  | 1.425   | 2.4285 | Up | 1.39E-12  | 4.53E-12  |
| Unigene60761 | Potri.008G147100.3 | 4.4331  | 0.8235  | 2.4285 | Up | 5.62E-05  | 1.10E-04  |
| Unigene84810 | Potri.002G256900.3 | 7.6715  | 1.425   | 2.4285 | Up | 8.27E-09  | 2.20E-08  |
| Unigene49335 | Potri.003G070600.3 | 41.6318 | 7.7411  | 2.4271 | Up | 6.03E-52  | 6.13E-51  |
| Unigene12546 | Potri.005G079800.1 | 28.9594 | 5.3853  | 2.4269 | Up | 1.28E-137 | 4.10E-136 |
| Unigene8426  | Potri.014G113500.1 | 45.09   | 8.3931  | 2.4255 | Up | 9.73E-75  | 1.47E-73  |



|               |                    |          |         |        |    |           |           |
|---------------|--------------------|----------|---------|--------|----|-----------|-----------|
| Unigene36651  | Potri.018G063800.1 | 22.2152  | 4.1367  | 2.425  | Up | 3.16E-22  | 1.51E-21  |
| Unigene16401  | Potri.006G052800.6 | 10.9071  | 2.031   | 2.425  | Up | 8.67E-12  | 2.72E-11  |
| Unigene19680  | Potri.002G112500.1 | 9.5913   | 1.786   | 2.425  | Up | 8.67E-12  | 2.72E-11  |
| Unigene38535  | Potri.004G102800.2 | 15.3207  | 2.8538  | 2.4245 | Up | 6.91E-29  | 4.06E-28  |
| Unigene23293  | Potri.017G000700.2 | 117.8876 | 21.9604 | 2.4244 | Up | 1.40E-144 | 4.75E-143 |
| Unigene47203  | Potri.012G145100.1 | 4.9145   | 0.9164  | 2.423  | Up | 1.94E-21  | 9.07E-21  |
| Unigene24068  | Potri.005G174700.3 | 5.5664   | 1.0389  | 2.4217 | Up | 1.06E-17  | 4.31E-17  |
| Unigene44554  | Potri.001G148800.1 | 26.3213  | 4.9163  | 2.4206 | Up | 2.68E-52  | 2.75E-51  |
| Unigene109737 | Potri.002G098800.1 | 42.6281  | 7.963   | 2.4204 | Up | 3.56E-33  | 2.35E-32  |
| Unigene116817 | Potri.007G144600.3 | 32.9311  | 6.1545  | 2.4197 | Up | 4.96E-39  | 3.80E-38  |
| Unigene68898  | Potri.004G048600.1 | 5.8957   | 1.1019  | 2.4197 | Up | 5.88E-14  | 2.05E-13  |
| Unigene45935  | Potri.006G249200.1 | 11.3611  | 2.1238  | 2.4194 | Up | 1.86E-29  | 1.11E-28  |
| Unigene16690  | Potri.011G008600.1 | 20.1922  | 3.7768  | 2.4186 | Up | 7.39E-20  | 3.27E-19  |
| Unigene32236  | Potri.008G201700.1 | 9.3997   | 1.7584  | 2.4184 | Up | 2.27E-141 | 7.52E-140 |
| Unigene90323  | Potri.019G059200.1 | 4.5271   | 0.8482  | 2.4161 | Up | 3.37E-07  | 8.03E-07  |
| Unigene90793  | Potri.016G073100.3 | 13.0643  | 2.4478  | 2.4161 | Up | 4.56E-19  | 1.96E-18  |
| Unigene76702  | Potri.013G143400.1 | 3.7792   | 0.7081  | 2.4161 | Up | 3.77E-04  | 6.80E-04  |
| Unigene27068  | Potri.012G134800.1 | 8.2095   | 1.5382  | 2.4161 | Up | 3.66E-13  | 1.23E-12  |
| Unigene57423  | Potri.011G057800.6 | 3.4874   | 0.6534  | 2.4161 | Up | 3.77E-04  | 6.80E-04  |
| Unigene66327  | Potri.008G063600.4 | 3.545    | 0.6642  | 2.4161 | Up | 3.77E-04  | 6.80E-04  |
| Unigene89278  | Potri.004G115900.1 | 4.8744   | 0.9133  | 2.4161 | Up | 3.37E-07  | 8.03E-07  |
| Unigene70098  | Potri.003G164700.1 | 4.6931   | 0.8793  | 2.4161 | Up | 4.05E-16  | 1.55E-15  |
| Unigene65310  | Potri.003G084000.1 | 11.1174  | 2.083   | 2.4161 | Up | 4.56E-19  | 1.96E-18  |
| Unigene37657  | Potri.001G118700.4 | 15.6692  | 2.9359  | 2.4161 | Up | 3.66E-13  | 1.23E-12  |
| Unigene66621  | Potri.001G016000.1 | 6.2926   | 1.179   | 2.4161 | Up | 3.42E-10  | 9.87E-10  |
| Unigene3811   | Potri.018G063800.1 | 9.2912   | 1.7409  | 2.416  | Up | 1.13E-36  | 8.17E-36  |
| Unigene5723   | Potri.014G121900.4 | 3.9995   | 0.7494  | 2.416  | Up | 3.37E-07  | 8.03E-07  |
| Unigene70075  | Potri.008G074500.3 | 9.6674   | 1.8132  | 2.4146 | Up | 5.85E-33  | 3.86E-32  |
| Unigene790    | Potri.018G034500.1 | 41.5972  | 7.8027  | 2.4144 | Up | 2.43E-200 | 1.27E-198 |
| Unigene13703  | Potri.011G004800.1 | 6.5734   | 1.2345  | 2.4127 | Up | 3.05E-29  | 1.82E-28  |
| Unigene17810  | Potri.003G072600.2 | 8.7167   | 1.638   | 2.4118 | Up | 2.29E-12  | 7.39E-12  |
| Unigene54156  | Potri.001G422000.1 | 7.4426   | 1.3986  | 2.4118 | Up | 2.29E-12  | 7.39E-12  |
| Unigene116294 | Potri.001G056500.2 | 114.3932 | 21.5004 | 2.4116 | Up | 1.38E-123 | 3.84E-122 |
| Unigene91753  | Potri.002G155300.1 | 20.0581  | 3.7702  | 2.4115 | Up | 2.19E-31  | 1.38E-30  |
| Unigene33762  | Potri.006G245600.1 | 5.4648   | 1.0275  | 2.411  | Up | 1.87E-28  | 1.09E-27  |
| Unigene33446  | Potri.001G164700.5 | 39.5855  | 7.4484  | 2.41   | Up | 1.63E-91  | 3.11E-90  |
| Unigene20729  | Potri.013G118000.5 | 14.1766  | 2.6691  | 2.4091 | Up | 1.56E-14  | 5.57E-14  |
| Unigene94662  | Potri.011G017500.2 | 12.3136  | 2.3184  | 2.4091 | Up | 1.56E-14  | 5.57E-14  |
| Unigene28350  | Potri.008G131400.2 | 169.8434 | 31.9993 | 2.4081 | Up | 4.43E-281 | 3.57E-279 |

|               |                    |          |         |        |    |           |           |
|---------------|--------------------|----------|---------|--------|----|-----------|-----------|
| Unigene30487  | Potri.001G327800.3 | 36.0833  | 6.8015  | 2.4074 | Up | 2.05E-80  | 3.38E-79  |
| Unigene35868  | Potri.016G138900.2 | 7.3136   | 1.3789  | 2.4071 | Up | 2.17E-06  | 4.86E-06  |
| Unigene37204  | Potri.008G187900.1 | 6.065    | 1.1435  | 2.4071 | Up | 2.17E-06  | 4.86E-06  |
| Unigene64502  | Potri.003G095300.6 | 4.6335   | 0.8736  | 2.4071 | Up | 2.17E-06  | 4.86E-06  |
| Unigene73031  | Potri.001G264400.3 | 7.1387   | 1.3459  | 2.4071 | Up | 2.17E-06  | 4.86E-06  |
| Unigene6020   | Potri.014G158300.1 | 3.3832   | 0.6379  | 2.407  | Up | 1.43E-11  | 4.45E-11  |
| Unigene117870 | Potri.004G102500.2 | 418.2536 | 78.9242 | 2.4058 | Up | 0         | 0         |
| Unigene51408  | Potri.004G229500.1 | 7.6042   | 1.4352  | 2.4055 | Up | 7.51E-19  | 3.20E-18  |
| Unigene28069  | Potri.005G071000.1 | 79.1579  | 14.9578 | 2.4038 | Up | 4.72E-98  | 9.86E-97  |
| Unigene51588  | Potri.017G051100.1 | 27.9747  | 5.2875  | 2.4035 | Up | 3.73E-23  | 1.84E-22  |
| Unigene93857  | Potri.013G013800.1 | 3.2213   | 0.6089  | 2.4034 | Up | 1.37E-08  | 3.59E-08  |
| Unigene89614  | Potri.010G170700.1 | 5.9222   | 1.1194  | 2.4034 | Up | 1.37E-08  | 3.59E-08  |
| Unigene64113  | Potri.009G037700.1 | 4.6624   | 0.8813  | 2.4034 | Up | 1.37E-08  | 3.59E-08  |
| Unigene118114 | Potri.006G134400.1 | 258.4457 | 48.8526 | 2.4034 | Up | 0         | 0         |
| Unigene17796  | Potri.017G039500.2 | 20.5376  | 3.8829  | 2.4031 | Up | 6.08E-47  | 5.57E-46  |
| Unigene1340   | Potri.002G182400.2 | 101.3874 | 19.1855 | 2.4018 | Up | 8.39E-252 | 5.83E-250 |
| Unigene12778  | Potri.007G078200.2 | 10.2237  | 1.9366  | 2.4003 | Up | 1.62E-24  | 8.38E-24  |
| Unigene45926  | Potri.006G071000.1 | 129.9238 | 24.611  | 2.4003 | Up | 2.35E-93  | 4.60E-92  |
| Unigene89291  | Potri.002G259300.1 | 9.6428   | 1.8266  | 2.4003 | Up | 6.04E-13  | 2.01E-12  |
| Unigene84085  | Potri.001G344400.2 | 12.3428  | 2.338   | 2.4003 | Up | 6.04E-13  | 2.01E-12  |
| Unigene19152  | Potri.005G102400.1 | 5.3346   | 1.0115  | 2.3989 | Up | 2.86E-17  | 1.15E-16  |
| Unigene96230  | Potri.006G145600.1 | 19.5081  | 3.6991  | 2.3988 | Up | 2.86E-17  | 1.15E-16  |
| Unigene109723 | Potri.001G118700.4 | 153.3235 | 29.0741 | 2.3988 | Up | 6.66E-114 | 1.68E-112 |
| Unigene48835  | Potri.001G436100.1 | 15.9266  | 3.0228  | 2.3975 | Up | 7.09E-26  | 3.81E-25  |
| Unigene66261  | Potri.001G048500.1 | 3.4091   | 0.6481  | 2.3951 | Up | 8.71E-08  | 2.16E-07  |
| Unigene110582 | Potri.016G142900.1 | 129.6367 | 24.6469 | 2.395  | Up | 6.81E-100 | 1.46E-98  |
| Unigene10271  | Potri.014G038700.1 | 29.7052  | 5.6477  | 2.395  | Up | 3.36E-57  | 3.79E-56  |
| Unigene10194  | Potri.013G036000.1 | 7.6397   | 1.4525  | 2.395  | Up | 8.67E-21  | 3.96E-20  |
| Unigene8770   | Potri.003G081800.1 | 9.2704   | 1.7625  | 2.395  | Up | 3.77E-12  | 1.21E-11  |
| Unigene50307  | Potri.013G059500.3 | 5.548    | 1.0575  | 2.3913 | Up | 7.62E-18  | 3.13E-17  |
| Unigene87156  | Potri.007G123300.2 | 11.4768  | 2.1896  | 2.39   | Up | 1.60E-13  | 5.45E-13  |
| Unigene108112 | Potri.010G192800.2 | 31.8411  | 6.0768  | 2.3895 | Up | 1.64E-23  | 8.17E-23  |
| Unigene10358  | Potri.004G189800.1 | 6.1775   | 1.1794  | 2.389  | Up | 2.32E-21  | 1.08E-20  |
| Unigene23879  | Potri.009G054200.2 | 14.8658  | 2.8392  | 2.3884 | Up | 3.64E-29  | 2.16E-28  |
| Unigene103111 | Potri.012G006100.1 | 77.0857  | 14.7346 | 2.3873 | Up | 9.51E-64  | 1.21E-62  |
| Unigene91221  | Potri.005G229400.3 | 5.6404   | 1.0781  | 2.3873 | Up | 3.56E-09  | 9.69E-09  |
| Unigene27370  | Potri.004G189200.1 | 8.2298   | 1.5731  | 2.3872 | Up | 7.14E-25  | 3.72E-24  |
| Unigene24772  | Potri.002G182400.1 | 8.6076   | 1.6486  | 2.3844 | Up | 9.95E-13  | 3.27E-12  |
| Unigene60660  | Potri.016G056400.2 | 3.1315   | 0.5998  | 2.3843 | Up | 5.58E-07  | 1.31E-06  |

|               |                    |         |         |        |    |           |           |
|---------------|--------------------|---------|---------|--------|----|-----------|-----------|
| Unigene54357  | Potri.014G078800.3 | 6.0595  | 1.1606  | 2.3843 | Up | 5.58E-07  | 1.31E-06  |
| Unigene51291  | Potri.002G167700.6 | 13.8717 | 2.6569  | 2.3843 | Up | 9.95E-13  | 3.27E-12  |
| Unigene90292  | Potri.001G150900.1 | 4.4404  | 0.8505  | 2.3843 | Up | 5.58E-07  | 1.31E-06  |
| Unigene8053   | Potri.016G035700.1 | 24.8336 | 4.7588  | 2.3836 | Up | 6.92E-65  | 8.96E-64  |
| Unigene24167  | Potri.001G054500.2 | 7.7129  | 1.478   | 2.3836 | Up | 6.92E-65  | 8.96E-64  |
| Unigene38409  | Potri.002G223000.1 | 34.1575 | 6.5519  | 2.3822 | Up | 9.96E-44  | 8.50E-43  |
| Unigene8270   | Potri.T053400.1    | 7.0908  | 1.3604  | 2.3819 | Up | 1.48E-10  | 4.35E-10  |
| Unigene14605  | Potri.018G102800.1 | 9.1679  | 1.7589  | 2.3819 | Up | 8.77E-20  | 3.87E-19  |
| Unigene35873  | Potri.008G091400.1 | 6.2739  | 1.2037  | 2.3819 | Up | 1.48E-10  | 4.35E-10  |
| Unigene110988 | Potri.003G167600.1 | 83.5968 | 16.0388 | 2.3819 | Up | 1.87E-65  | 2.45E-64  |
| Unigene68445  | Potri.014G138200.1 | 7.5648  | 1.4525  | 2.3808 | Up | 4.22E-14  | 1.48E-13  |
| Unigene17310  | Potri.019G083100.1 | 23.431  | 4.5029  | 2.3795 | Up | 8.61E-48  | 8.04E-47  |
| Unigene9933   | Potri.010G110500.1 | 3.6517  | 0.7025  | 2.378  | Up | 9.34E-05  | 1.80E-04  |
| Unigene65718  | Potri.001G061800.1 | 4.6008  | 0.8851  | 2.378  | Up | 9.34E-05  | 1.80E-04  |
| Unigene54074  | Potri.T091900.1    | 10.2057 | 1.9634  | 2.3779 | Up | 6.21E-12  | 1.97E-11  |
| Unigene92142  | Potri.015G135800.4 | 6.8559  | 1.319   | 2.3779 | Up | 6.21E-12  | 1.96E-11  |
| Unigene70034  | Potri.014G159100.1 | 3.0538  | 0.5875  | 2.3779 | Up | 6.21E-12  | 1.97E-11  |
| Unigene54960  | Potri.009G163300.3 | 3.1696  | 0.6098  | 2.3779 | Up | 2.26E-08  | 5.84E-08  |
| Unigene64229  | Potri.005G108700.2 | 3.3261  | 0.6399  | 2.3779 | Up | 9.34E-05  | 1.80E-04  |
| Unigene30195  | Potri.005G063600.1 | 4.6624  | 0.897   | 2.3779 | Up | 6.21E-12  | 1.97E-11  |
| Unigene72877  | Potri.003G056500.4 | 5.0211  | 0.966   | 2.3779 | Up | 9.34E-05  | 1.80E-04  |
| Unigene79554  | Potri.010G147100.1 | 4.2979  | 0.8269  | 2.3778 | Up | 9.34E-05  | 1.80E-04  |
| Unigene109547 | Potri.010G146200.1 | 62.1081 | 11.9621 | 2.3763 | Up | 3.19E-46  | 2.87E-45  |
| Unigene13983  | Potri.003G145100.1 | 13.9506 | 2.6896  | 2.3749 | Up | 3.13E-25  | 1.65E-24  |
| Unigene39306  | Potri.014G197000.1 | 50.8168 | 9.7999  | 2.3745 | Up | 5.74E-126 | 1.64E-124 |
| Unigene94216  | Potri.010G160100.1 | 3.1122  | 0.6005  | 2.3737 | Up | 9.30E-10  | 2.62E-09  |
| Unigene15654  | Potri.008G166700.1 | 9.1207  | 1.7599  | 2.3737 | Up | 9.30E-10  | 2.62E-09  |
| Unigene67477  | Potri.010G090400.2 | 14.6798 | 2.8348  | 2.3725 | Up | 3.69E-41  | 2.97E-40  |
| Unigene25151  | Potri.019G083700.1 | 4.8168  | 0.9314  | 2.3706 | Up | 3.60E-06  | 7.93E-06  |
| Unigene75405  | Potri.018G063800.1 | 13.2244 | 2.5572  | 2.3706 | Up | 3.88E-11  | 1.18E-10  |
| Unigene6957   | Potri.014G047600.1 | 30.5847 | 5.9142  | 2.3706 | Up | 4.09E-79  | 6.62E-78  |
| Unigene70205  | Potri.006G126300.3 | 5.5206  | 1.0675  | 2.3706 | Up | 6.24E-21  | 2.86E-20  |
| Unigene90521  | Potri.002G217200.1 | 3.7784  | 0.7306  | 2.3706 | Up | 3.60E-06  | 7.93E-06  |
| Unigene31500  | Potri.001G322400.1 | 5.9214  | 1.145   | 2.3706 | Up | 4.78E-16  | 1.82E-15  |
| Unigene53992  | Potri.T179000.1    | 7.096   | 1.3722  | 2.3705 | Up | 3.60E-06  | 7.93E-06  |
| Unigene86901  | Potri.016G126500.2 | 4.723   | 0.9133  | 2.3705 | Up | 3.60E-06  | 7.93E-06  |
| Unigene64443  | Potri.010G184600.1 | 3.9529  | 0.7644  | 2.3705 | Up | 3.60E-06  | 7.93E-06  |
| Unigene76597  | Potri.003G178400.1 | 6.4083  | 1.2392  | 2.3705 | Up | 3.60E-06  | 7.93E-06  |
| Unigene61787  | Potri.003G123400.1 | 6.3895  | 1.2356  | 2.3705 | Up | 4.78E-16  | 1.82E-15  |

|               |                    |          |         |        |    |           |           |
|---------------|--------------------|----------|---------|--------|----|-----------|-----------|
| Unigene44979  | Potri.001G242100.1 | 14.7363  | 2.8496  | 2.3705 | Up | 1.60E-35  | 1.12E-34  |
| Unigene20433  | Potri.006G092300.1 | 141.9408 | 27.4569 | 2.37   | Up | 3.87E-210 | 2.13E-208 |
| Unigene89134  | Potri.001G097100.1 | 9.5119   | 1.8423  | 2.3682 | Up | 1.64E-12  | 5.32E-12  |
| Unigene20198  | Potri.002G111000.1 | 9.3925   | 1.82    | 2.3676 | Up | 8.87E-19  | 3.77E-18  |
| Unigene92304  | Potri.003G165000.1 | 11.9806  | 2.3233  | 2.3665 | Up | 3.83E-20  | 1.72E-19  |
| Unigene57829  | Potri.008G115000.1 | 5.5341   | 1.0732  | 2.3664 | Up | 1.44E-07  | 3.53E-07  |
| Unigene33526  | Potri.019G083900.1 | 16.7559  | 3.2508  | 2.3658 | Up | 5.95E-34  | 4.01E-33  |
| Unigene11696  | Potri.010G200000.5 | 7.7982   | 1.5135  | 2.3653 | Up | 2.62E-35  | 1.83E-34  |
| Unigene21495  | Potri.013G141000.1 | 59.8494  | 11.622  | 2.3645 | Up | 0         | 0         |
| Unigene67816  | Potri.019G089800.3 | 5.2791   | 1.0256  | 2.3638 | Up | 5.87E-09  | 1.57E-08  |
| Unigene40919  | Potri.003G198800.1 | 7.6351   | 1.4833  | 2.3638 | Up | 5.87E-09  | 1.57E-08  |
| Unigene64122  | Potri.002G184300.2 | 4.4352   | 0.8617  | 2.3637 | Up | 5.87E-09  | 1.57E-08  |
| Unigene18998  | Potri.014G056700.5 | 37.0529  | 7.2068  | 2.3622 | Up | 4.03E-150 | 1.45E-148 |
| Unigene58868  | Potri.002G157700.2 | 6.008    | 1.1687  | 2.362  | Up | 2.43E-10  | 7.07E-10  |
| Unigene12958  | Potri.016G143700.4 | 16.1043  | 3.1342  | 2.3613 | Up | 1.02E-20  | 4.66E-20  |
| Unigene94381  | Potri.001G286800.1 | 11.9822  | 2.332   | 2.3613 | Up | 6.01E-40  | 4.71E-39  |
| Unigene94485  | Potri.011G046400.2 | 8.8408   | 1.7235  | 2.3588 | Up | 1.61E-40  | 1.28E-39  |
| Unigene66980  | Potri.002G135700.1 | 8.0752   | 1.5743  | 2.3588 | Up | 1.83E-14  | 6.53E-14  |
| Unigene52624  | Potri.001G334100.1 | 11.4005  | 2.2251  | 2.3572 | Up | 1.15E-35  | 8.11E-35  |
| Unigene68670  | Potri.002G203600.2 | 9.096    | 1.7758  | 2.3568 | Up | 6.28E-20  | 2.79E-19  |
| Unigene14618  | Potri.008G056100.1 | 91.5005  | 17.895  | 2.3542 | Up | 5.67E-79  | 9.17E-78  |
| Unigene28091  | Potri.014G047600.4 | 11.734   | 2.2953  | 2.3539 | Up | 1.01E-45  | 8.96E-45  |
| Unigene74933  | Potri.014G123100.1 | 5.6463   | 1.106   | 2.352  | Up | 2.34E-05  | 4.79E-05  |
| Unigene59584  | Potri.007G094100.1 | 3.1561   | 0.6182  | 2.352  | Up | 9.20E-07  | 2.12E-06  |
| Unigene93100  | Potri.005G191500.1 | 5.3885   | 1.0555  | 2.352  | Up | 6.38E-11  | 1.92E-10  |
| Unigene91293  | Potri.002G249400.1 | 3.9642   | 0.7765  | 2.352  | Up | 9.20E-07  | 2.12E-06  |
| Unigene77020  | Potri.014G090100.2 | 5.375    | 1.0529  | 2.3519 | Up | 2.34E-05  | 4.79E-05  |
| Unigene77724  | Potri.012G077700.5 | 21.1311  | 4.1392  | 2.3519 | Up | 8.95E-18  | 3.66E-17  |
| Unigene44137  | Potri.004G144200.1 | 6.4426   | 1.262   | 2.3519 | Up | 2.63E-27  | 1.47E-26  |
| Unigene62135  | Potri.003G198300.4 | 4.3076   | 0.8438  | 2.3519 | Up | 9.20E-07  | 2.12E-06  |
| Unigene6164   | Potri.001G164700.5 | 92.438   | 18.1072 | 2.3519 | Up | 1.20E-232 | 7.50E-231 |
| Unigene67904  | Potri.001G134800.2 | 10.9656  | 2.148   | 2.3519 | Up | 8.95E-18  | 3.66E-17  |
| Unigene114910 | Potri.005G206900.1 | 75.9408  | 14.8888 | 2.3506 | Up | 3.22E-71  | 4.61E-70  |
| Unigene73061  | Potri.013G132300.2 | 53.897   | 10.5751 | 2.3495 | Up | 9.78E-39  | 7.44E-38  |
| Unigene115913 | Potri.003G011600.1 | 148.4571 | 29.1409 | 2.3489 | Up | 3.96E-149 | 1.41E-147 |
| Unigene5693   | Potri.005G242700.6 | 50.2627  | 9.8816  | 2.3467 | Up | 4.55E-52  | 4.64E-51  |
| Unigene42479  | Potri.009G109500.1 | 19.809   | 3.8966  | 2.3459 | Up | 1.67E-132 | 5.09E-131 |
| Unigene43880  | Potri.007G046400.3 | 10.8812  | 2.1417  | 2.345  | Up | 4.29E-27  | 2.39E-26  |
| Unigene93752  | Potri.005G072500.1 | 15.6681  | 3.0863  | 2.3439 | Up | 1.87E-34  | 1.28E-33  |

|               |                    |          |         |        |    |           |           |
|---------------|--------------------|----------|---------|--------|----|-----------|-----------|
| Unigene67770  | Potri.017G000300.1 | 4.566    | 0.9007  | 2.3418 | Up | 4.00E-10  | 1.15E-09  |
| Unigene54084  | Potri.T016200.1    | 3.67     | 0.7262  | 2.3373 | Up | 2.37E-07  | 5.71E-07  |
| Unigene85019  | Potri.017G129900.6 | 6.4355   | 1.2735  | 2.3373 | Up | 2.37E-07  | 5.71E-07  |
| Unigene58636  | Potri.010G222700.5 | 5.6236   | 1.1128  | 2.3373 | Up | 2.37E-07  | 5.71E-07  |
| Unigene84711  | Potri.003G078800.1 | 6.5042   | 1.2871  | 2.3372 | Up | 2.37E-07  | 5.71E-07  |
| Unigene24787  | Potri.001G075600.1 | 5.641    | 1.1163  | 2.3372 | Up | 2.37E-07  | 5.71E-07  |
| Unigene108290 | Potri.010G226000.4 | 60.1138  | 11.8995 | 2.3368 | Up | 3.66E-42  | 3.02E-41  |
| Unigene51508  | Potri.010G044400.1 | 26.7145  | 5.2947  | 2.335  | Up | 2.36E-53  | 2.47E-52  |
| Unigene5861   | Potri.014G081300.3 | 17.4986  | 3.4728  | 2.3331 | Up | 4.47E-20  | 1.99E-19  |
| Unigene85456  | Potri.008G018300.3 | 9.8089   | 1.9467  | 2.3331 | Up | 1.05E-10  | 3.11E-10  |
| Unigene64985  | Potri.006G069000.1 | 3.9263   | 0.7792  | 2.3331 | Up | 5.93E-06  | 1.28E-05  |
| Unigene64291  | Potri.004G100100.1 | 5.5638   | 1.1042  | 2.3331 | Up | 4.47E-20  | 1.99E-19  |
| Unigene110297 | Potri.001G429900.1 | 6.3846   | 1.2671  | 2.3331 | Up | 5.93E-06  | 1.28E-05  |
| Unigene85530  | Potri.019G123500.2 | 4.8875   | 0.97    | 2.333  | Up | 5.93E-06  | 1.28E-05  |
| Unigene59754  | Potri.002G192400.1 | 3.5084   | 0.6963  | 2.333  | Up | 5.93E-06  | 1.28E-05  |
| Unigene6123   | Potri.012G078900.2 | 38.1798  | 7.5866  | 2.3313 | Up | 7.07E-44  | 6.05E-43  |
| Unigene69050  | Potri.010G048300.6 | 4.5065   | 0.8963  | 2.33   | Up | 2.51E-09  | 6.89E-09  |
| Unigene31675  | Potri.014G120800.1 | 46.4035  | 9.2369  | 2.3288 | Up | 1.83E-65  | 2.40E-64  |
| Unigene5863   | Potri.003G140500.8 | 6.5488   | 1.3037  | 2.3286 | Up | 1.16E-12  | 3.79E-12  |
| Unigene15149  | Potri.001G302100.2 | 6.8631   | 1.3663  | 2.3286 | Up | 1.16E-12  | 3.79E-12  |
| Unigene33679  | Potri.009G029100.4 | 5.4429   | 1.0841  | 2.3279 | Up | 1.57E-30  | 9.67E-30  |
| Unigene88043  | Potri.016G121500.1 | 3.0892   | 0.6163  | 2.3255 | Up | 1.55E-04  | 2.90E-04  |
| Unigene91148  | Potri.010G062700.1 | 4.9367   | 0.9849  | 2.3255 | Up | 6.10E-08  | 1.54E-07  |
| Unigene66999  | Potri.003G142800.1 | 4.0123   | 0.8005  | 2.3255 | Up | 1.55E-04  | 2.90E-04  |
| Unigene19979  | Potri.003G118400.5 | 4.5161   | 0.901   | 2.3255 | Up | 1.55E-04  | 2.90E-04  |
| Unigene65136  | Potri.002G123600.3 | 4.6303   | 0.9238  | 2.3255 | Up | 6.10E-08  | 1.54E-07  |
| Unigene66783  | Potri.001G154300.2 | 10.0508  | 2.0052  | 2.3255 | Up | 6.35E-18  | 2.62E-17  |
| Unigene90448  | Potri.001G139300.1 | 7.8884   | 1.5738  | 2.3255 | Up | 2.74E-11  | 8.40E-11  |
| Unigene86259  | Potri.013G158100.4 | 3.3682   | 0.672   | 2.3254 | Up | 1.55E-04  | 2.90E-04  |
| Unigene79150  | Potri.007G033700.4 | 4.1962   | 0.8372  | 2.3254 | Up | 1.55E-04  | 2.90E-04  |
| Unigene49686  | Potri.006G123100.1 | 7.2506   | 1.4496  | 2.3224 | Up | 3.05E-13  | 1.03E-12  |
| Unigene37908  | Potri.014G108100.1 | 28.9045  | 5.7816  | 2.3218 | Up | 1.57E-67  | 2.12E-66  |
| Unigene9797   | Potri.006G197000.2 | 35.2443  | 7.0529  | 2.3211 | Up | 1.05E-57  | 1.19E-56  |
| Unigene63600  | Potri.006G149700.2 | 4.678    | 0.9366  | 2.3204 | Up | 3.44E-15  | 1.26E-14  |
| Unigene22271  | Potri.001G280400.2 | 5.2489   | 1.0509  | 2.3204 | Up | 3.44E-15  | 1.26E-14  |
| Unigene88886  | Potri.001G072100.1 | 12.2882  | 2.4603  | 2.3204 | Up | 3.44E-15  | 1.26E-14  |
| Unigene106044 | Potri.001G466000.2 | 388.7679 | 77.8445 | 2.3202 | Up | 0         | 0         |
| Unigene22109  | Potri.012G078900.2 | 60.1428  | 12.0476 | 2.3196 | Up | 3.61E-199 | 1.87E-197 |
| Unigene66397  | Potri.001G102900.9 | 3.0785   | 0.617   | 2.3189 | Up | 1.51E-06  | 3.44E-06  |

|               |                    |          |         |        |    |           |           |
|---------------|--------------------|----------|---------|--------|----|-----------|-----------|
| Unigene25894  | Potri.T070000.1    | 14.9198  | 2.9905  | 2.3188 | Up | 7.19E-12  | 2.27E-11  |
| Unigene87096  | Potri.011G025200.3 | 5.1572   | 1.0337  | 2.3188 | Up | 1.51E-06  | 3.44E-06  |
| Unigene87730  | Potri.004G085500.1 | 5.0121   | 1.0046  | 2.3188 | Up | 1.51E-06  | 3.44E-06  |
| Unigene84957  | Potri.010G254900.7 | 5.6475   | 1.132   | 2.3187 | Up | 1.51E-06  | 3.44E-06  |
| Unigene6666   | Potri.011G042800.1 | 67.8027  | 13.5985 | 2.3179 | Up | 6.86E-103 | 1.52E-101 |
| Unigene64551  | Potri.015G094300.1 | 3.1438   | 0.6315  | 2.3157 | Up | 1.58E-08  | 4.14E-08  |
| Unigene33680  | Potri.012G079700.4 | 14.346   | 2.8816  | 2.3157 | Up | 3.00E-37  | 2.20E-36  |
| Unigene16338  | Potri.001G164700.3 | 18.0383  | 3.6233  | 2.3157 | Up | 9.09E-16  | 3.42E-15  |
| Unigene94398  | Potri.019G075400.1 | 4.4013   | 0.8841  | 2.3156 | Up | 9.09E-16  | 3.42E-15  |
| Unigene108891 | Potri.014G065500.1 | 44.7595  | 8.9938  | 2.3152 | Up | 4.90E-32  | 3.15E-31  |
| Unigene38323  | Potri.001G115000.1 | 178.3582 | 35.8432 | 2.315  | Up | 1.55E-273 | 1.20E-271 |
| Unigene92998  | Potri.018G081900.1 | 5.3387   | 1.0737  | 2.3139 | Up | 1.71E-10  | 5.02E-10  |
| Unigene115473 | Potri.009G035000.1 | 9.6464   | 1.94    | 2.3139 | Up | 1.71E-10  | 5.02E-10  |
| Unigene69794  | Potri.012G099600.1 | 9.0091   | 1.8142  | 2.312  | Up | 2.12E-14  | 7.54E-14  |
| Unigene27165  | Potri.012G094600.1 | 44.4086  | 8.9521  | 2.3105 | Up | 1.45E-59  | 1.71E-58  |
| Unigene7889   | Potri.016G088600.2 | 29.389   | 5.9334  | 2.3083 | Up | 3.05E-72  | 4.44E-71  |
| Unigene90539  | Potri.014G170000.1 | 3.0922   | 0.6246  | 2.3076 | Up | 3.86E-05  | 7.73E-05  |
| Unigene83377  | Potri.012G131000.2 | 4.4371   | 0.8963  | 2.3076 | Up | 3.86E-05  | 7.73E-05  |
| Unigene38179  | Potri.011G039800.1 | 6.753    | 1.3641  | 2.3076 | Up | 6.37E-17  | 2.52E-16  |
| Unigene84362  | Potri.010G026200.2 | 4.2935   | 0.8673  | 2.3076 | Up | 3.86E-05  | 7.73E-05  |
| Unigene83048  | Potri.001G325200.5 | 4.4872   | 0.9064  | 2.3076 | Up | 3.86E-05  | 7.73E-05  |
| Unigene68117  | Potri.001G205800.8 | 3.7772   | 0.763   | 2.3076 | Up | 3.86E-05  | 7.73E-05  |
| Unigene66156  | Potri.014G126700.1 | 3.8453   | 0.7768  | 2.3075 | Up | 4.48E-11  | 1.36E-10  |
| Unigene88174  | Potri.010G172500.3 | 3.639    | 0.7351  | 2.3075 | Up | 3.86E-05  | 7.73E-05  |
| Unigene8592   | Potri.010G168500.4 | 10.0091  | 2.0219  | 2.3075 | Up | 6.37E-17  | 2.52E-16  |
| Unigene66304  | Potri.008G026900.3 | 3.2434   | 0.6552  | 2.3075 | Up | 3.86E-05  | 7.73E-05  |
| Unigene92251  | Potri.006G280200.3 | 5.1448   | 1.0393  | 2.3075 | Up | 4.11E-09  | 1.11E-08  |
| Unigene93133  | Potri.005G215400.1 | 3.334    | 0.6735  | 2.3075 | Up | 3.88E-07  | 9.22E-07  |
| Unigene79219  | Potri.002G242900.3 | 14.8579  | 3.0014  | 2.3075 | Up | 4.98E-13  | 1.66E-12  |
| Unigene86239  | Potri.001G188900.1 | 3.9919   | 0.8064  | 2.3075 | Up | 3.86E-05  | 7.73E-05  |
| Unigene93513  | Potri.018G132600.1 | 37.7421  | 7.6284  | 2.3067 | Up | 2.21E-73  | 3.27E-72  |
| Unigene109761 | Potri.009G079700.1 | 66.8642  | 13.5185 | 2.3063 | Up | 2.20E-48  | 2.08E-47  |
| Unigene95491  | Potri.008G075200.1 | 82.3278  | 16.6533 | 2.3056 | Up | 1.70E-60  | 2.03E-59  |
| Unigene55134  | Potri.004G224400.3 | 170.4907 | 34.4909 | 2.3054 | Up | 4.20E-137 | 1.34E-135 |
| Unigene33750  | Potri.002G174900.1 | 56.7264  | 11.4815 | 2.3047 | Up | 3.08E-124 | 8.63E-123 |
| Unigene24020  | Potri.018G081900.1 | 13.9289  | 2.82    | 2.3043 | Up | 1.94E-19  | 8.46E-19  |
| Unigene64031  | Potri.018G063000.2 | 9.5801   | 1.9426  | 2.3021 | Up | 1.62E-54  | 1.74E-53  |
| Unigene46710  | Potri.001G370300.3 | 68.2336  | 13.8362 | 2.302  | Up | 6.98E-75  | 1.06E-73  |
| Unigene37452  | Potri.004G200400.1 | 14.6104  | 2.963   | 2.3019 | Up | 1.17E-11  | 3.67E-11  |

|               |                    |          |         |        |    |           |           |
|---------------|--------------------|----------|---------|--------|----|-----------|-----------|
| Unigene65796  | Potri.002G056900.1 | 7.2056   | 1.4613  | 2.3019 | Up | 1.17E-11  | 3.67E-11  |
| Unigene97176  | Potri.015G085700.2 | 19.7393  | 4.0047  | 2.3013 | Up | 5.15E-20  | 2.29E-19  |
| Unigene54365  | Potri.008G067600.2 | 3.8877   | 0.7891  | 2.3006 | Up | 1.07E-09  | 3.00E-09  |
| Unigene36984  | Potri.006G146200.1 | 19.6418  | 3.99    | 2.2995 | Up | 3.46E-37  | 2.53E-36  |
| Unigene46442  | Potri.017G039500.2 | 17.5462  | 3.5667  | 2.2985 | Up | 1.37E-20  | 6.22E-20  |
| Unigene69933  | Potri.008G090800.1 | 4.0468   | 0.8226  | 2.2985 | Up | 3.46E-14  | 1.22E-13  |
| Unigene1635   | Potri.006G220500.1 | 6.3106   | 1.2832  | 2.298  | Up | 9.26E-38  | 6.88E-37  |
| Unigene27693  | Potri.004G002900.1 | 53.9049  | 10.9678 | 2.2971 | Up | 7.11E-79  | 1.15E-77  |
| Unigene51915  | Potri.010G195100.1 | 3.7466   | 0.7624  | 2.297  | Up | 3.09E-12  | 9.91E-12  |
| Unigene26172  | Potri.015G076400.1 | 104.905  | 21.3484 | 2.2969 | Up | 3.52E-109 | 8.39E-108 |
| Unigene43611  | Potri.011G166400.2 | 9.8391   | 2.0031  | 2.2963 | Up | 4.13E-73  | 6.10E-72  |
| Unigene19828  | Potri.005G206500.4 | 8.5506   | 1.7409  | 2.2962 | Up | 1.04E-16  | 4.07E-16  |
| Unigene61862  | Potri.002G081600.1 | 5.2575   | 1.0704  | 2.2962 | Up | 1.04E-16  | 4.07E-16  |
| Unigene22339  | Potri.002G117800.1 | 18.5859  | 3.7846  | 2.296  | Up | 2.10E-36  | 1.51E-35  |
| Unigene65583  | Potri.006G230800.6 | 4.7263   | 0.9633  | 2.2947 | Up | 9.75E-06  | 2.06E-05  |
| Unigene82231  | Potri.006G065700.1 | 15.924   | 3.2457  | 2.2946 | Up | 9.13E-15  | 3.30E-14  |
| Unigene48444  | Potri.001G017600.2 | 5.9744   | 1.2177  | 2.2946 | Up | 9.75E-06  | 2.06E-05  |
| Unigene88734  | Potri.014G151300.2 | 4.071    | 0.8298  | 2.2945 | Up | 9.75E-06  | 2.06E-05  |
| Unigene62722  | Potri.006G236600.1 | 4.071    | 0.8298  | 2.2945 | Up | 9.75E-06  | 2.06E-05  |
| Unigene91904  | Potri.004G190900.1 | 3.1083   | 0.6336  | 2.2945 | Up | 9.75E-06  | 2.06E-05  |
| Unigene62138  | Potri.014G171600.1 | 4.9582   | 1.0117  | 2.293  | Up | 2.75E-17  | 1.10E-16  |
| Unigene27251  | Potri.005G247300.2 | 8.0723   | 1.6494  | 2.291  | Up | 2.58E-22  | 1.24E-21  |
| Unigene16430  | Potri.014G122800.1 | 10.081   | 2.0636  | 2.2884 | Up | 2.14E-13  | 7.25E-13  |
| Unigene18699  | Potri.010G000700.2 | 53.008   | 10.8646 | 2.2866 | Up | 4.22E-99  | 8.97E-98  |
| Unigene40330  | Potri.016G120300.1 | 7.3895   | 1.5164  | 2.2848 | Up | 5.63E-14  | 1.96E-13  |
| Unigene60837  | Potri.013G126100.1 | 3.5047   | 0.7192  | 2.2848 | Up | 2.48E-06  | 5.53E-06  |
| Unigene117404 | Potri.013G008900.1 | 36.9887  | 7.5905  | 2.2848 | Up | 4.73E-44  | 4.06E-43  |
| Unigene64506  | Potri.010G073400.1 | 4.8351   | 0.9922  | 2.2848 | Up | 2.48E-06  | 5.53E-06  |
| Unigene40464  | Potri.009G080600.1 | 5.257    | 1.0788  | 2.2848 | Up | 2.48E-06  | 5.53E-06  |
| Unigene54127  | Potri.008G063200.1 | 6.5823   | 1.3508  | 2.2848 | Up | 6.71E-09  | 1.79E-08  |
| Unigene48576  | Potri.003G116600.1 | 5.1532   | 1.0575  | 2.2848 | Up | 2.48E-06  | 5.53E-06  |
| Unigene26438  | Potri.002G020900.4 | 6.2915   | 1.2911  | 2.2848 | Up | 2.48E-06  | 5.53E-06  |
| Unigene27827  | Potri.007G126700.1 | 11.4599  | 2.3592  | 2.2802 | Up | 7.60E-39  | 5.79E-38  |
| Unigene118389 | Potri.003G006500.4 | 251.6009 | 51.7984 | 2.2802 | Up | 0         | 0         |
| Unigene8553   | Potri.015G082900.1 | 9.1655   | 1.889   | 2.2786 | Up | 3.92E-15  | 1.44E-14  |
| Unigene64139  | Potri.014G073800.2 | 3.0243   | 0.6239  | 2.2772 | Up | 3.14E-18  | 1.31E-17  |
| Unigene35390  | Potri.001G471100.1 | 3.762    | 0.7761  | 2.2772 | Up | 6.35E-07  | 1.48E-06  |
| Unigene27848  | Potri.014G120600.1 | 4.6013   | 0.9493  | 2.2771 | Up | 6.35E-07  | 1.48E-06  |
| Unigene69283  | Potri.012G123900.1 | 5.202    | 1.0732  | 2.2771 | Up | 6.35E-07  | 1.48E-06  |

|               |                    |          |          |        |    |           |           |
|---------------|--------------------|----------|----------|--------|----|-----------|-----------|
| Unigene35643  | Potri.008G018000.1 | 3.3139   | 0.6837   | 2.2771 | Up | 6.35E-07  | 1.48E-06  |
| Unigene112467 | Potri.001G087500.2 | 620.7382 | 128.1627 | 2.276  | Up | 0         | 0         |
| Unigene2329   | Potri.007G115800.2 | 11.2515  | 2.3248   | 2.2749 | Up | 1.75E-27  | 9.87E-27  |
| Unigene13469  | Potri.008G030300.1 | 27.0194  | 5.5867   | 2.2739 | Up | 1.04E-36  | 7.55E-36  |
| Unigene27579  | Potri.015G138500.1 | 10.6142  | 2.1966   | 2.2727 | Up | 1.81E-22  | 8.73E-22  |
| Unigene93811  | Potri.005G070100.2 | 10.1883  | 2.1085   | 2.2726 | Up | 1.81E-22  | 8.73E-22  |
| Unigene86193  | Potri.006G245800.1 | 3.2543   | 0.6742   | 2.2711 | Up | 2.55E-04  | 4.67E-04  |
| Unigene47202  | Potri.015G118200.1 | 18.3846  | 3.809    | 2.271  | Up | 9.16E-14  | 3.16E-13  |
| Unigene83219  | Potri.013G153400.2 | 7.2643   | 1.5051   | 2.271  | Up | 1.63E-07  | 3.99E-07  |
| Unigene85082  | Potri.010G069600.1 | 3.4028   | 0.705    | 2.271  | Up | 2.55E-04  | 4.67E-04  |
| Unigene70083  | Potri.007G098800.3 | 3.8792   | 0.8037   | 2.271  | Up | 1.63E-07  | 3.99E-07  |
| Unigene48036  | Potri.002G118200.1 | 3.7735   | 0.7818   | 2.271  | Up | 2.55E-04  | 4.67E-04  |
| Unigene68528  | Potri.T173600.1    | 3.1183   | 0.6461   | 2.2709 | Up | 2.55E-04  | 4.67E-04  |
| Unigene92989  | Potri.006G001200.1 | 3.7086   | 0.7684   | 2.2709 | Up | 1.63E-07  | 3.99E-07  |
| Unigene28008  | Potri.001G134800.2 | 11.048   | 2.2932   | 2.2684 | Up | 2.42E-14  | 8.54E-14  |
| Unigene91909  | Potri.017G017000.1 | 6.957    | 1.4449   | 2.2675 | Up | 3.12E-11  | 9.52E-11  |
| Unigene52467  | Potri.013G128500.4 | 3.522    | 0.7315   | 2.2675 | Up | 3.12E-11  | 9.52E-11  |
| Unigene6052   | Potri.016G139100.1 | 136.7379 | 28.4718  | 2.2638 | Up | 0         | 0         |
| Unigene51394  | Potri.003G151100.1 | 36.6007  | 7.623    | 2.2634 | Up | 7.43E-51  | 7.38E-50  |
| Unigene26075  | Potri.005G256600.4 | 27.3831  | 5.7061   | 2.2627 | Up | 3.84E-30  | 2.34E-29  |
| Unigene63620  | Potri.T005300.1    | 5.4542   | 1.1373   | 2.2618 | Up | 1.09E-08  | 2.89E-08  |
| Unigene83172  | Potri.012G108000.1 | 4.3307   | 0.903    | 2.2618 | Up | 6.35E-05  | 1.24E-04  |
| Unigene84256  | Potri.009G108200.1 | 4.1743   | 0.8704   | 2.2618 | Up | 6.35E-05  | 1.24E-04  |
| Unigene25099  | Potri.018G017800.1 | 7.4841   | 1.5606   | 2.2617 | Up | 4.45E-16  | 1.70E-15  |
| Unigene26558  | Potri.014G036400.1 | 5.7527   | 1.1996   | 2.2617 | Up | 6.35E-05  | 1.24E-04  |
| Unigene87982  | Potri.008G006100.1 | 3.5578   | 0.7419   | 2.2617 | Up | 6.35E-05  | 1.24E-04  |
| Unigene93715  | Potri.005G093000.1 | 3.6824   | 0.7679   | 2.2617 | Up | 1.09E-08  | 2.89E-08  |
| Unigene68032  | Potri.001G376600.1 | 3.6361   | 0.7582   | 2.2617 | Up | 6.35E-05  | 1.24E-04  |
| Unigene43656  | Potri.013G059300.3 | 21.6358  | 4.5152   | 2.2606 | Up | 4.48E-50  | 4.38E-49  |
| Unigene16168  | Potri.014G004900.3 | 10.9442  | 2.286    | 2.2593 | Up | 1.47E-24  | 7.61E-24  |
| Unigene63590  | Potri.013G023100.5 | 5.7747   | 1.2062   | 2.2593 | Up | 5.65E-13  | 1.88E-12  |
| Unigene51363  | Potri.006G068200.4 | 69.922   | 14.6128  | 2.2585 | Up | 1.11E-71  | 1.60E-70  |
| Unigene75084  | Potri.011G057700.1 | 68.4677  | 14.3125  | 2.2581 | Up | 1.01E-48  | 9.59E-48  |
| Unigene4526   | Potri.010G153200.1 | 11.2571  | 2.3532   | 2.2581 | Up | 2.84E-09  | 7.78E-09  |
| Unigene53211  | Potri.003G109300.1 | 90.7326  | 18.9763  | 2.2574 | Up | 2.15E-73  | 3.19E-72  |
| Unigene112578 | Potri.006G105500.1 | 15.7453  | 3.2939   | 2.2571 | Up | 1.49E-13  | 5.09E-13  |
| Unigene93609  | Potri.018G034500.1 | 21.2349  | 4.4429   | 2.2569 | Up | 5.16E-42  | 4.24E-41  |
| Unigene80330  | Potri.017G123600.1 | 10.8727  | 2.2777   | 2.2551 | Up | 7.41E-10  | 2.10E-09  |
| Unigene17467  | Potri.006G016200.1 | 130.9121 | 27.4244  | 2.2551 | Up | 8.70E-149 | 3.09E-147 |



|               |                    |          |         |        |    |           |           |
|---------------|--------------------|----------|---------|--------|----|-----------|-----------|
| Unigene91768  | Potri.004G078800.1 | 3.0657   | 0.6422  | 2.2551 | Up | 1.60E-05  | 3.31E-05  |
| Unigene16875  | Potri.001G023100.1 | 4.9918   | 1.0457  | 2.2551 | Up | 1.60E-05  | 3.31E-05  |
| Unigene47411  | Potri.001G264400.4 | 7.8987   | 1.6547  | 2.255  | Up | 7.41E-10  | 2.10E-09  |
| Unigene102978 | Potri.T026800.1    | 15.4958  | 3.2503  | 2.2532 | Up | 1.03E-14  | 3.72E-14  |
| Unigene67720  | Potri.010G184500.2 | 4.7411   | 0.9945  | 2.2532 | Up | 1.03E-14  | 3.72E-14  |
| Unigene101649 | Potri.010G111500.1 | 44.3937  | 9.3148  | 2.2528 | Up | 3.94E-95  | 7.91E-94  |
| Unigene94020  | Potri.015G075300.3 | 4.0225   | 0.8442  | 2.2524 | Up | 1.93E-10  | 5.66E-10  |
| Unigene12990  | Potri.008G152000.1 | 27.7371  | 5.823   | 2.252  | Up | 1.39E-110 | 3.38E-109 |
| Unigene52458  | Potri.001G348600.1 | 31.6098  | 6.6408  | 2.2509 | Up | 2.63E-48  | 2.49E-47  |
| Unigene89322  | Potri.013G009700.1 | 4.3322   | 0.9107  | 2.2501 | Up | 4.06E-06  | 8.86E-06  |
| Unigene10032  | Potri.011G134900.1 | 6.6491   | 1.3977  | 2.2501 | Up | 5.06E-11  | 1.53E-10  |
| Unigene87992  | Potri.001G271100.1 | 4.691    | 0.9861  | 2.2501 | Up | 4.06E-06  | 8.86E-06  |
| Unigene72287  | Potri.016G071500.2 | 7.4237   | 1.5606  | 2.25   | Up | 4.06E-06  | 8.86E-06  |
| Unigene86873  | Potri.014G104200.4 | 4.9814   | 1.0472  | 2.25   | Up | 4.06E-06  | 8.86E-06  |
| Unigene91900  | Potri.006G062900.4 | 3.4443   | 0.7241  | 2.2499 | Up | 4.06E-06  | 8.86E-06  |
| Unigene115903 | Potri.002G102500.1 | 413.2593 | 86.8905 | 2.2498 | Up | 0         | 0         |
| Unigene41471  | Potri.009G041400.4 | 10.1726  | 2.1415  | 2.248  | Up | 1.33E-11  | 4.13E-11  |
| Unigene6921   | Potri.013G099900.1 | 5.3024   | 1.1163  | 2.2479 | Up | 7.69E-22  | 3.64E-21  |
| Unigene34892  | Potri.001G224800.1 | 13.8376  | 2.9147  | 2.2472 | Up | 5.92E-38  | 4.42E-37  |
| Unigene26754  | Potri.016G088600.2 | 7.6941   | 1.6218  | 2.2462 | Up | 1.04E-06  | 2.38E-06  |
| Unigene66880  | Potri.001G102000.1 | 5.9576   | 1.2558  | 2.2461 | Up | 1.04E-06  | 2.38E-06  |
| Unigene89821  | Potri.006G233800.1 | 19.825   | 4.1837  | 2.2445 | Up | 3.86E-24  | 1.97E-23  |
| Unigene2192   | Potri.001G267500.1 | 24.4418  | 5.162   | 2.2433 | Up | 1.84E-48  | 1.74E-47  |
| Unigene94260  | Potri.010G218300.1 | 4.8085   | 1.0167  | 2.2417 | Up | 6.35E-14  | 2.21E-13  |
| Unigene42226  | Potri.017G113000.1 | 12.3946  | 2.6208  | 2.2416 | Up | 1.94E-26  | 1.06E-25  |
| Unigene13185  | Potri.001G097100.1 | 6.0661   | 1.2837  | 2.2405 | Up | 4.68E-21  | 2.15E-20  |
| Unigene64430  | Potri.010G184300.1 | 5.985    | 1.2666  | 2.2404 | Up | 6.87E-08  | 1.72E-07  |
| Unigene73267  | Potri.008G212000.1 | 9.9465   | 2.1049  | 2.2404 | Up | 6.87E-08  | 1.72E-07  |
| Unigene69546  | Potri.002G063700.3 | 3.0136   | 0.6387  | 2.2383 | Up | 1.78E-08  | 4.64E-08  |
| Unigene91076  | Potri.010G175500.6 | 11.6964  | 2.4806  | 2.2373 | Up | 3.09E-16  | 1.19E-15  |
| Unigene62439  | Potri.016G103800.2 | 4.5005   | 0.955   | 2.2365 | Up | 4.62E-09  | 1.25E-08  |
| Unigene52742  | Potri.008G166000.1 | 7.5283   | 1.5976  | 2.2364 | Up | 4.62E-09  | 1.25E-08  |
| Unigene31856  | Potri.015G051400.1 | 10.1128  | 2.1466  | 2.2361 | Up | 4.19E-188 | 2.02E-186 |
| Unigene40950  | Potri.006G214800.1 | 16.6036  | 3.5272  | 2.2349 | Up | 5.74E-18  | 2.37E-17  |
| Unigene84973  | Potri.001G348900.3 | 9.3249   | 1.981   | 2.2349 | Up | 1.20E-09  | 3.36E-09  |
| Unigene21530  | Potri.008G103600.1 | 9.8611   | 2.0962  | 2.234  | Up | 3.43E-53  | 3.58E-52  |
| Unigene67081  | Potri.014G016900.1 | 3.0713   | 0.6531  | 2.2335 | Up | 3.14E-10  | 9.07E-10  |
| Unigene17134  | Potri.012G046600.1 | 76.668   | 16.3033 | 2.2335 | Up | 2.55E-151 | 9.27E-150 |
| Unigene93990  | Potri.001G134800.3 | 4.0152   | 0.8538  | 2.2335 | Up | 3.14E-10  | 9.07E-10  |

|               |                    |          |         |        |    |           |           |
|---------------|--------------------|----------|---------|--------|----|-----------|-----------|
| Unigene25801  | Potri.011G039800.5 | 12.4596  | 2.6505  | 2.2329 | Up | 1.07E-19  | 4.72E-19  |
| Unigene32117  | Potri.004G002500.1 | 47.8372  | 10.1761 | 2.2329 | Up | 2.16E-173 | 9.32E-172 |
| Unigene68945  | Potri.007G063900.2 | 4.007    | 0.8527  | 2.2324 | Up | 8.21E-11  | 2.45E-10  |
| Unigene59548  | Potri.016G119900.2 | 3.8784   | 0.8254  | 2.2323 | Up | 8.21E-11  | 2.45E-10  |
| Unigene52060  | Potri.018G003100.1 | 6.7615   | 1.4409  | 2.2304 | Up | 5.64E-12  | 1.79E-11  |
| Unigene115683 | Potri.013G008900.1 | 23.5642  | 5.0232  | 2.2299 | Up | 3.78E-23  | 1.86E-22  |
| Unigene1295   | Potri.006G178500.1 | 21.9342  | 4.677   | 2.2295 | Up | 6.48E-46  | 5.80E-45  |
| Unigene117390 | Potri.004G041600.1 | 61.404   | 13.0966 | 2.2291 | Up | 9.30E-70  | 1.30E-68  |
| Unigene116092 | Potri.T091700.2    | 12.2313  | 2.6094  | 2.2288 | Up | 3.90E-13  | 1.31E-12  |
| Unigene8701   | Potri.017G026700.1 | 9.7046   | 2.0708  | 2.2285 | Up | 8.31E-85  | 1.46E-83  |
| Unigene12590  | Potri.012G082500.2 | 15.7767  | 3.3669  | 2.2283 | Up | 1.07E-37  | 7.97E-37  |
| Unigene25732  | Potri.009G071600.1 | 4.6351   | 0.9893  | 2.2281 | Up | 1.03E-13  | 3.54E-13  |
| Unigene70144  | Potri.006G081400.3 | 6.9596   | 1.4858  | 2.2278 | Up | 1.35E-26  | 7.42E-26  |
| Unigene42631  | Potri.003G009300.2 | 85.935   | 18.346  | 2.2278 | Up | 0         | 0         |
| Unigene30968  | Potri.013G009700.1 | 7.3506   | 1.5708  | 2.2264 | Up | 1.89E-15  | 7.02E-15  |
| Unigene86861  | Potri.002G182400.1 | 17.7385  | 3.796   | 2.2243 | Up | 2.46E-18  | 1.03E-17  |
| Unigene17123  | Potri.008G158900.1 | 4.0687   | 0.8721  | 2.222  | Up | 1.62E-23  | 8.10E-23  |
| Unigene14484  | Potri.014G098100.1 | 131.9097 | 28.3056 | 2.2204 | Up | 1.04E-112 | 2.57E-111 |
| Unigene39656  | Potri.005G216400.1 | 87.5762  | 18.8049 | 2.2194 | Up | 1.06E-265 | 7.95E-264 |
| Unigene39953  | Potri.009G073100.1 | 24.0664  | 5.1709  | 2.2185 | Up | 7.33E-42  | 6.01E-41  |
| Unigene20184  | Potri.014G156300.1 | 18.5803  | 3.9936  | 2.218  | Up | 1.40E-47  | 1.30E-46  |
| Unigene65940  | Potri.019G054900.3 | 4.9186   | 1.0598  | 2.2145 | Up | 2.88E-08  | 7.42E-08  |
| Unigene88119  | Potri.018G069800.3 | 3.422    | 0.7373  | 2.2145 | Up | 1.04E-04  | 1.99E-04  |
| Unigene62952  | Potri.012G108000.1 | 3.7719   | 0.8127  | 2.2145 | Up | 1.69E-06  | 3.81E-06  |
| Unigene94035  | Potri.010G144000.1 | 7.0034   | 1.509   | 2.2145 | Up | 5.65E-17  | 2.24E-16  |
| Unigene66243  | Potri.009G082300.4 | 3.7004   | 0.7973  | 2.2145 | Up | 4.18E-04  | 7.46E-04  |
| Unigene92988  | Potri.006G202200.1 | 4.2791   | 0.922   | 2.2145 | Up | 2.88E-08  | 7.42E-08  |
| Unigene14419  | Potri.001G276700.1 | 5.6946   | 1.227   | 2.2145 | Up | 6.60E-06  | 1.42E-05  |
| Unigene79207  | Potri.001G111100.3 | 6.1908   | 1.3339  | 2.2145 | Up | 6.60E-06  | 1.42E-05  |
| Unigene93176  | Potri.001G098900.1 | 6.8818   | 1.4828  | 2.2145 | Up | 6.30E-13  | 2.09E-12  |
| Unigene76518  | Potri.019G059200.1 | 4.1261   | 0.8891  | 2.2144 | Up | 4.18E-04  | 7.46E-04  |
| Unigene94380  | Potri.018G031300.1 | 5.8039   | 1.2506  | 2.2144 | Up | 1.05E-18  | 4.46E-18  |
| Unigene68181  | Potri.017G149000.1 | 4.3493   | 0.9372  | 2.2144 | Up | 8.06E-16  | 3.04E-15  |
| Unigene56440  | Potri.017G097900.1 | 5.7561   | 1.2403  | 2.2144 | Up | 5.08E-10  | 1.45E-09  |
| Unigene17432  | Potri.017G016200.1 | 7.4329   | 1.6016  | 2.2144 | Up | 4.38E-14  | 1.53E-13  |
| Unigene70208  | Potri.016G053400.1 | 3.954    | 0.852   | 2.2144 | Up | 2.88E-08  | 7.42E-08  |
| Unigene45781  | Potri.016G031100.4 | 13.385   | 2.8841  | 2.2144 | Up | 5.08E-10  | 1.45E-09  |
| Unigene9326   | Potri.013G092000.1 | 27.4038  | 5.9048  | 2.2144 | Up | 3.70E-22  | 1.76E-21  |
| Unigene67722  | Potri.009G078500.2 | 3.2314   | 0.6963  | 2.2144 | Up | 2.61E-05  | 5.30E-05  |

|               |                    |          |         |        |    |           |           |
|---------------|--------------------|----------|---------|--------|----|-----------|-----------|
| Unigene107680 | Potri.008G224300.1 | 11.0791  | 2.3872  | 2.2144 | Up | 2.88E-08  | 7.42E-08  |
| Unigene85700  | Potri.008G200900.1 | 3.1935   | 0.6881  | 2.2144 | Up | 4.18E-04  | 7.46E-04  |
| Unigene80068  | Potri.008G045300.5 | 3.7906   | 0.8168  | 2.2144 | Up | 4.18E-04  | 7.46E-04  |
| Unigene92687  | Potri.005G190200.2 | 5.264    | 1.1343  | 2.2144 | Up | 1.95E-09  | 5.38E-09  |
| Unigene85792  | Potri.014G131700.1 | 3.1826   | 0.6858  | 2.2143 | Up | 4.18E-04  | 7.46E-04  |
| Unigene33417  | Potri.001G164700.4 | 54.2708  | 11.7207 | 2.2111 | Up | 3.31E-101 | 7.19E-100 |
| Unigene51885  | Potri.010G161200.1 | 36.929   | 7.9838  | 2.2096 | Up | 1.01E-35  | 7.13E-35  |
| Unigene28625  | Potri.010G238300.6 | 10.459   | 2.2627  | 2.2086 | Up | 5.43E-30  | 3.30E-29  |
| Unigene21241  | Potri.014G113500.1 | 73.5456  | 15.9173 | 2.208  | Up | 0         | 0         |
| Unigene23079  | Potri.010G195600.1 | 25.6838  | 5.562   | 2.2072 | Up | 5.81E-47  | 5.32E-46  |
| Unigene35944  | Potri.010G147000.1 | 27.2712  | 5.9073  | 2.2068 | Up | 1.13E-44  | 9.81E-44  |
| Unigene30729  | Potri.001G082300.1 | 18.3929  | 3.9853  | 2.2064 | Up | 5.95E-22  | 2.82E-21  |
| Unigene115475 | Potri.001G115000.1 | 190.3563 | 41.2938 | 2.2047 | Up | 1.09E-169 | 4.61E-168 |
| Unigene24914  | Potri.003G109300.1 | 12.462   | 2.7039  | 2.2044 | Up | 2.27E-34  | 1.55E-33  |
| Unigene15273  | Potri.016G142900.2 | 318.6555 | 69.1512 | 2.2042 | Up | 0         | 0         |
| Unigene8817   | Potri.006G101400.1 | 16.5643  | 3.5948  | 2.2041 | Up | 2.41E-17  | 9.70E-17  |
| Unigene70321  | Potri.001G122200.2 | 7.6583   | 1.662   | 2.2041 | Up | 2.41E-17  | 9.70E-17  |
| Unigene37183  | Potri.011G144800.1 | 38.4472  | 8.3462  | 2.2037 | Up | 4.45E-32  | 2.86E-31  |
| Unigene103664 | Potri.008G112800.1 | 26.5388  | 5.7611  | 2.2037 | Up | 2.50E-47  | 2.31E-46  |
| Unigene94376  | Potri.001G001800.3 | 5.2446   | 1.1385  | 2.2037 | Up | 9.10E-17  | 3.58E-16  |
| Unigene4809   | Potri.005G163600.1 | 18.1378  | 3.9397  | 2.2028 | Up | 1.30E-15  | 4.86E-15  |
| Unigene6378   | Potri.009G121000.5 | 26.7368  | 5.8085  | 2.2026 | Up | 3.27E-29  | 1.94E-28  |
| Unigene70044  | Potri.001G147800.1 | 5.3802   | 1.169   | 2.2024 | Up | 4.92E-15  | 1.80E-14  |
| Unigene119091 | Potri.003G132200.2 | 38.4062  | 8.3456  | 2.2023 | Up | 1.25E-68  | 1.72E-67  |
| Unigene24107  | Potri.008G131400.1 | 90.3649  | 19.6369 | 2.2022 | Up | 6.52E-268 | 4.95E-266 |
| Unigene32277  | Potri.008G049900.1 | 11.8532  | 2.5775  | 2.2012 | Up | 4.00E-51  | 3.99E-50  |
| Unigene16624  | Potri.009G138900.1 | 18.8308  | 4.0966  | 2.2006 | Up | 2.68E-13  | 9.06E-13  |
| Unigene9333   | Potri.014G059200.1 | 7.3267   | 1.5947  | 2.1999 | Up | 1.02E-12  | 3.34E-12  |
| Unigene117417 | Potri.001G268500.1 | 208.6088 | 45.4171 | 2.1995 | Up | 4.16E-230 | 2.56E-228 |
| Unigene46075  | Potri.005G198900.2 | 58.0215  | 12.6327 | 2.1994 | Up | 1.04E-66  | 1.38E-65  |
| Unigene18721  | Potri.012G007500.1 | 110.0551 | 23.9726 | 2.1988 | Up | 6.67E-292 | 5.71E-290 |
| Unigene91123  | Potri.005G223500.1 | 7.6982   | 1.6785  | 2.1973 | Up | 5.62E-11  | 1.70E-10  |
| Unigene114912 | Potri.016G139100.4 | 21.8699  | 4.7702  | 2.1968 | Up | 5.10E-20  | 2.27E-19  |
| Unigene17692  | Potri.012G007500.1 | 67.4541  | 14.7433 | 2.1938 | Up | 1.38E-64  | 1.78E-63  |
| Unigene2939   | Potri.010G223000.5 | 18.8547  | 4.1216  | 2.1936 | Up | 8.20E-33  | 5.38E-32  |
| Unigene408    | Potri.002G081400.2 | 78.5291  | 17.1672 | 2.1936 | Up | 0         | 0         |
| Unigene1513   | Potri.017G030100.1 | 95.8401  | 20.997  | 2.1904 | Up | 1.48E-149 | 5.30E-148 |
| Unigene68591  | Potri.013G079700.1 | 6.7922   | 1.4883  | 2.1902 | Up | 4.67E-08  | 1.18E-07  |
| Unigene4717   | Potri.012G006000.1 | 7.4726   | 1.6374  | 2.1902 | Up | 7.92E-15  | 2.86E-14  |

|               |                    |          |         |        |    |           |           |
|---------------|--------------------|----------|---------|--------|----|-----------|-----------|
| Unigene10540  | Potri.005G220700.1 | 119.5254 | 26.191  | 2.1902 | Up | 1.15E-114 | 2.94E-113 |
| Unigene106605 | Potri.001G370300.3 | 116.1068 | 25.4506 | 2.1897 | Up | 2.33E-138 | 7.50E-137 |
| Unigene11229  | Potri.010G195600.1 | 24.5092  | 5.3749  | 2.189  | Up | 4.12E-84  | 7.15E-83  |
| Unigene13814  | Potri.005G102400.1 | 9.5963   | 2.1052  | 2.1885 | Up | 1.91E-51  | 1.92E-50  |
| Unigene32125  | Potri.013G045000.1 | 92.041   | 20.1967 | 2.1882 | Up | 0         | 0         |
| Unigene66466  | Potri.008G105300.7 | 4.2315   | 0.9286  | 2.188  | Up | 1.80E-07  | 4.39E-07  |
| Unigene98588  | Potri.001G254600.3 | 48.1723  | 10.5751 | 2.1875 | Up | 1.48E-37  | 1.09E-36  |
| Unigene51763  | Potri.008G186500.1 | 17.5427  | 3.8534  | 2.1867 | Up | 4.31E-13  | 1.45E-12  |
| Unigene14895  | Potri.013G048100.1 | 6.1746   | 1.3576  | 2.1853 | Up | 7.01E-07  | 1.63E-06  |
| Unigene51700  | Potri.008G100100.2 | 20.0403  | 4.4063  | 2.1853 | Up | 3.62E-29  | 2.15E-28  |
| Unigene78996  | Potri.001G057800.1 | 7.6153   | 1.6744  | 2.1853 | Up | 7.01E-07  | 1.63E-06  |
| Unigene90583  | Potri.018G128100.1 | 4.7227   | 1.0384  | 2.1852 | Up | 7.01E-07  | 1.63E-06  |
| Unigene10762  | Potri.019G083100.1 | 47.2101  | 10.3917 | 2.1837 | Up | 0         | 0         |
| Unigene24246  | Potri.014G108100.1 | 42.3111  | 9.3147  | 2.1835 | Up | 8.96E-126 | 2.55E-124 |
| Unigene36895  | Potri.006G247900.1 | 10.5145  | 2.3152  | 2.1832 | Up | 6.24E-17  | 2.47E-16  |
| Unigene58357  | Potri.006G064000.1 | 4.134    | 0.911   | 2.182  | Up | 2.73E-06  | 6.07E-06  |
| Unigene17920  | Potri.005G020000.2 | 8.1381   | 1.7934  | 2.182  | Up | 2.36E-16  | 9.10E-16  |
| Unigene87217  | Potri.002G203900.2 | 5.2602   | 1.1592  | 2.182  | Up | 2.73E-06  | 6.07E-06  |
| Unigene35898  | Potri.001G079800.1 | 22.3797  | 4.9318  | 2.182  | Up | 2.36E-16  | 9.10E-16  |
| Unigene70311  | Potri.009G078500.1 | 8.4372   | 1.8601  | 2.1814 | Up | 9.08E-60  | 1.08E-58  |
| Unigene68550  | Potri.001G370300.3 | 11.2567  | 2.4816  | 2.1814 | Up | 1.24E-35  | 8.73E-35  |
| Unigene26045  | Potri.012G105900.2 | 6.8191   | 1.5047  | 2.1801 | Up | 9.05E-11  | 2.70E-10  |
| Unigene19779  | Potri.011G145900.2 | 8.3785   | 1.8488  | 2.1801 | Up | 3.50E-20  | 1.57E-19  |
| Unigene70341  | Potri.018G130600.1 | 4.1333   | 0.9121  | 2.18   | Up | 9.05E-11  | 2.70E-10  |
| Unigene60749  | Potri.010G239700.1 | 3.7764   | 0.8337  | 2.1794 | Up | 3.37E-15  | 1.24E-14  |
| Unigene40045  | Potri.019G021100.1 | 49.304   | 10.8876 | 2.179  | Up | 8.31E-92  | 1.59E-90  |
| Unigene67892  | Potri.007G006700.1 | 4.7851   | 1.0575  | 2.1779 | Up | 1.07E-05  | 2.26E-05  |
| Unigene86514  | Potri.002G197400.1 | 4.8168   | 1.0645  | 2.1779 | Up | 1.07E-05  | 2.26E-05  |
| Unigene117186 | Potri.007G043800.1 | 337.406  | 74.6132 | 2.177  | Up | 0         | 0         |
| Unigene68624  | Potri.004G014700.2 | 11.6753  | 2.5819  | 2.177  | Up | 7.48E-23  | 3.65E-22  |
| Unigene117803 | Potri.004G200400.1 | 167.9451 | 37.1504 | 2.1765 | Up | 8.60E-195 | 4.33E-193 |
| Unigene1284   | Potri.014G085700.2 | 47.5078  | 10.5146 | 2.1758 | Up | 2.51E-96  | 5.11E-95  |
| Unigene201    | Potri.018G031500.1 | 43.0745  | 9.5339  | 2.1757 | Up | 1.19E-284 | 9.81E-283 |
| Unigene109648 | Potri.007G043800.2 | 241.2383 | 53.3942 | 2.1757 | Up | 1.11E-157 | 4.25E-156 |
| Unigene46024  | Potri.013G092000.1 | 31.2973  | 6.9285  | 2.1754 | Up | 4.30E-26  | 2.32E-25  |
| Unigene25645  | Potri.008G111900.1 | 10.7623  | 2.3825  | 2.1754 | Up | 1.32E-09  | 3.69E-09  |
| Unigene19082  | Potri.002G041000.1 | 15.7727  | 3.493   | 2.1749 | Up | 5.20E-62  | 6.41E-61  |
| Unigene17812  | Potri.003G182200.1 | 40.9243  | 9.07    | 2.1738 | Up | 9.63E-41  | 7.68E-40  |
| Unigene88773  | Potri.008G111500.2 | 3.73     | 0.8273  | 2.1727 | Up | 4.23E-05  | 8.43E-05  |

|               |                    |          |         |        |    |           |           |
|---------------|--------------------|----------|---------|--------|----|-----------|-----------|
| Unigene85689  | Potri.002G013900.1 | 4.3431   | 0.9633  | 2.1727 | Up | 4.23E-05  | 8.43E-05  |
| Unigene76474  | Potri.012G035400.4 | 11.2229  | 2.4893  | 2.1726 | Up | 5.08E-09  | 1.37E-08  |
| Unigene66813  | Potri.007G094100.1 | 3.1391   | 0.6963  | 2.1726 | Up | 4.23E-05  | 8.43E-05  |
| Unigene54045  | Potri.004G030100.1 | 4.3062   | 0.9552  | 2.1725 | Up | 5.08E-09  | 1.37E-08  |
| Unigene91374  | Potri.001G099500.1 | 3.0339   | 0.673   | 2.1725 | Up | 4.23E-05  | 8.43E-05  |
| Unigene29146  | Potri.003G006500.4 | 5.2037   | 1.1555  | 2.171  | Up | 3.78E-16  | 1.45E-15  |
| Unigene94345  | Potri.014G128300.1 | 3.9455   | 0.8764  | 2.1705 | Up | 2.64E-12  | 8.49E-12  |
| Unigene62779  | Potri.008G108000.1 | 5.7889   | 1.2859  | 2.1705 | Up | 2.64E-12  | 8.49E-12  |
| Unigene31457  | Potri.013G029500.1 | 48.1819  | 10.7047 | 2.1702 | Up | 9.31E-70  | 1.30E-68  |
| Unigene69790  | Potri.001G205400.1 | 9.4199   | 2.0935  | 2.1698 | Up | 1.84E-26  | 1.01E-25  |
| Unigene4327   | Potri.009G111700.1 | 8.3034   | 1.846   | 2.1693 | Up | 1.95E-08  | 5.08E-08  |
| Unigene116555 | Potri.008G112800.1 | 29.1006  | 6.4694  | 2.1693 | Up | 1.07E-29  | 6.41E-29  |
| Unigene4213   | Potri.016G096300.1 | 11.7923  | 2.6238  | 2.1681 | Up | 1.00E-11  | 3.14E-11  |
| Unigene5646   | Potri.003G196400.1 | 3.9272   | 0.874   | 2.1678 | Up | 2.58E-25  | 1.36E-24  |
| Unigene38103  | Potri.016G088600.2 | 144.2027 | 32.1123 | 2.1669 | Up | 5.92E-98  | 1.23E-96  |
| Unigene47243  | Potri.010G223000.3 | 37.2995  | 8.306   | 2.1669 | Up | 3.56E-58  | 4.09E-57  |
| Unigene16136  | Potri.015G129000.2 | 3.1908   | 0.7112  | 2.1656 | Up | 1.69E-04  | 3.16E-04  |
| Unigene62817  | Potri.008G151700.1 | 3.4339   | 0.7654  | 2.1656 | Up | 1.69E-04  | 3.16E-04  |
| Unigene41007  | Potri.019G132000.2 | 3.5006   | 0.7803  | 2.1655 | Up | 1.69E-04  | 3.16E-04  |
| Unigene26718  | Potri.018G124100.1 | 10.9578  | 2.4425  | 2.1655 | Up | 3.63E-24  | 1.85E-23  |
| Unigene83434  | Potri.016G088600.2 | 4.0211   | 0.8963  | 2.1655 | Up | 1.69E-04  | 3.16E-04  |
| Unigene75979  | Potri.011G162400.1 | 4.8506   | 1.0812  | 2.1655 | Up | 1.69E-04  | 3.16E-04  |
| Unigene17645  | Potri.005G070900.2 | 4.0412   | 0.9008  | 2.1655 | Up | 3.82E-11  | 1.16E-10  |
| Unigene68288  | Potri.002G084300.3 | 3.3489   | 0.7465  | 2.1655 | Up | 1.69E-04  | 3.16E-04  |
| Unigene23703  | Potri.006G128600.5 | 67.1733  | 14.989  | 2.164  | Up | 4.93E-89  | 9.13E-88  |
| Unigene97318  | Potri.004G010500.2 | 46.2359  | 10.3254 | 2.1628 | Up | 2.83E-41  | 2.29E-40  |
| Unigene76678  | Potri.012G048200.1 | 85.6082  | 19.119  | 2.1627 | Up | 1.76E-59  | 2.07E-58  |
| Unigene8266   | Potri.005G257900.3 | 60.3747  | 13.4859 | 2.1625 | Up | 1.45E-107 | 3.39E-106 |
| Unigene27546  | Potri.008G149200.6 | 16.062   | 3.5891  | 2.162  | Up | 1.39E-31  | 8.84E-31  |
| Unigene89319  | Potri.017G014700.1 | 5.6002   | 1.2522  | 2.161  | Up | 2.91E-07  | 6.98E-07  |
| Unigene88894  | Potri.012G062700.1 | 5.7635   | 1.2887  | 2.161  | Up | 2.91E-07  | 6.98E-07  |
| Unigene6218   | Potri.010G118900.2 | 17.2653  | 3.8606  | 2.161  | Up | 2.94E-13  | 9.91E-13  |
| Unigene9118   | Potri.001G318100.1 | 42.6051  | 9.5267  | 2.161  | Up | 5.21E-31  | 3.25E-30  |
| Unigene580    | Potri.010G248300.2 | 25.9144  | 5.7994  | 2.1598 | Up | 6.28E-62  | 7.72E-61  |
| Unigene47779  | Potri.001G347600.1 | 85.315   | 19.0935 | 2.1597 | Up | 2.37E-93  | 4.63E-92  |
| Unigene52962  | Potri.012G129200.1 | 5.8614   | 1.3122  | 2.1593 | Up | 1.28E-18  | 5.39E-18  |
| Unigene63846  | Potri.005G230500.4 | 3.8207   | 0.8559  | 2.1583 | Up | 1.11E-12  | 3.65E-12  |
| Unigene2680   | Potri.009G162200.1 | 69.3539  | 15.5404 | 2.158  | Up | 5.90E-107 | 1.37E-105 |
| Unigene12522  | Potri.018G013300.1 | 18.7247  | 4.196   | 2.1579 | Up | 3.73E-43  | 3.15E-42  |

|               |                    |          |         |        |    |           |           |
|---------------|--------------------|----------|---------|--------|----|-----------|-----------|
| Unigene5480   | Potri.015G086500.1 | 52.1915  | 11.6957 | 2.1578 | Up | 3.73E-43  | 3.15E-42  |
| Unigene641    | Potri.006G166800.1 | 35.8368  | 8.037   | 2.1567 | Up | 6.37E-83  | 1.08E-81  |
| Unigene33851  | Potri.008G112700.1 | 98.0721  | 21.9979 | 2.1565 | Up | 1.97E-136 | 6.23E-135 |
| Unigene62933  | Potri.014G160800.1 | 5.0481   | 1.133   | 2.1556 | Up | 2.13E-09  | 5.87E-09  |
| Unigene48530  | Potri.010G212900.2 | 3.0922   | 0.694   | 2.1556 | Up | 1.13E-06  | 2.59E-06  |
| Unigene36597  | Potri.004G174100.5 | 4.5098   | 1.0122  | 2.1556 | Up | 1.13E-06  | 2.59E-06  |
| Unigene25980  | Potri.018G081200.5 | 8.2506   | 1.8519  | 2.1555 | Up | 1.13E-06  | 2.59E-06  |
| Unigene69119  | Potri.010G153400.1 | 4.1929   | 0.9411  | 2.1555 | Up | 1.13E-06  | 2.59E-06  |
| Unigene86180  | Potri.006G151800.1 | 6.008    | 1.3485  | 2.1555 | Up | 1.13E-06  | 2.59E-06  |
| Unigene6736   | Potri.003G116600.1 | 21.0358  | 4.7215  | 2.1555 | Up | 1.76E-25  | 9.37E-25  |
| Unigene42968  | Potri.018G072100.1 | 57.3633  | 12.8873 | 2.1542 | Up | 3.36E-167 | 1.39E-165 |
| Unigene111417 | Potri.016G124700.2 | 184.2469 | 41.3977 | 2.154  | Up | 4.35E-128 | 1.27E-126 |
| Unigene2353   | Potri.006G117200.1 | 7.9336   | 1.7838  | 2.153  | Up | 1.01E-39  | 7.85E-39  |
| Unigene50891  | Potri.003G088400.5 | 81.1445  | 18.2572 | 2.152  | Up | 2.03E-101 | 4.43E-100 |
| Unigene64224  | Potri.004G175600.1 | 4.6108   | 1.038   | 2.1512 | Up | 8.17E-09  | 2.17E-08  |
| Unigene15739  | Potri.016G124700.2 | 63.1581  | 14.2302 | 2.15   | Up | 1.91E-76  | 2.98E-75  |
| Unigene105362 | Potri.005G207300.1 | 21.9494  | 4.9459  | 2.1499 | Up | 2.04E-18  | 8.57E-18  |
| Unigene54396  | Potri.013G055800.4 | 4.3115   | 0.9722  | 2.1489 | Up | 4.41E-06  | 9.62E-06  |
| Unigene64499  | Potri.017G013000.1 | 3.0434   | 0.6863  | 2.1488 | Up | 4.41E-06  | 9.62E-06  |
| Unigene83637  | Potri.014G098600.3 | 5.9184   | 1.3346  | 2.1488 | Up | 4.41E-06  | 9.62E-06  |
| Unigene113084 | Potri.005G220900.2 | 157.4041 | 35.5237 | 2.1476 | Up | 1.26E-117 | 3.30E-116 |
| Unigene67500  | Potri.007G123400.1 | 7.5753   | 1.71    | 2.1473 | Up | 1.06E-24  | 5.48E-24  |
| Unigene33095  | Potri.010G111500.1 | 93.7336  | 21.1646 | 2.1469 | Up | 2.46E-203 | 1.30E-201 |
| Unigene62604  | Potri.001G234800.1 | 8.5969   | 1.942   | 2.1463 | Up | 3.14E-08  | 8.07E-08  |
| Unigene78391  | Potri.010G028900.1 | 9.799    | 2.2136  | 2.1462 | Up | 3.14E-08  | 8.07E-08  |
| Unigene76033  | Potri.009G089100.1 | 10.324   | 2.3322  | 2.1462 | Up | 3.14E-08  | 8.07E-08  |
| Unigene144    | Potri.002G146100.1 | 99.6667  | 22.5202 | 2.1459 | Up | 0         | 0         |
| Unigene1112   | Potri.005G207300.1 | 84.9789  | 19.2304 | 2.1437 | Up | 1.17E-193 | 5.86E-192 |
| Unigene105132 | Potri.T147500.1    | 44.0651  | 9.9744  | 2.1433 | Up | 5.62E-56  | 6.19E-55  |
| Unigene117220 | Potri.003G102300.2 | 237.7182 | 53.8092 | 2.1433 | Up | 1.15E-246 | 7.78E-245 |
| Unigene51846  | Potri.006G100000.1 | 6.8976   | 1.562   | 2.1427 | Up | 8.68E-19  | 3.69E-18  |
| Unigene4476   | Potri.009G079700.1 | 94.6106  | 21.4321 | 2.1422 | Up | 3.04E-89  | 5.64E-88  |
| Unigene24388  | Potri.019G131400.8 | 20.2079  | 4.5781  | 2.1421 | Up | 4.51E-25  | 2.36E-24  |
| Unigene94778  | Potri.016G084500.2 | 42.7862  | 9.6963  | 2.1416 | Up | 4.62E-99  | 9.80E-98  |
| Unigene16268  | Potri.T168800.3    | 10.0762  | 2.2854  | 2.1404 | Up | 1.21E-07  | 2.99E-07  |
| Unigene36423  | Potri.T003200.4    | 3.0813   | 0.6989  | 2.1404 | Up | 1.73E-05  | 3.57E-05  |
| Unigene57957  | Potri.017G036100.1 | 6.0314   | 1.368   | 2.1404 | Up | 1.73E-05  | 3.57E-05  |
| Unigene15102  | Potri.012G057700.3 | 5.5367   | 1.2558  | 2.1404 | Up | 1.73E-05  | 3.57E-05  |
| Unigene68897  | Potri.011G127000.3 | 4.3746   | 0.9922  | 2.1404 | Up | 1.73E-05  | 3.57E-05  |

|               |                     |          |         |        |    |           |           |
|---------------|---------------------|----------|---------|--------|----|-----------|-----------|
| Unigene62381  | Potri.007G011500.3  | 4.7037   | 1.0669  | 2.1404 | Up | 1.21E-07  | 2.99E-07  |
| Unigene23763  | Potri.006G224000.2  | 9.1963   | 2.0859  | 2.1404 | Up | 6.08E-35  | 4.21E-34  |
| Unigene89135  | Potri.002G109600.1  | 4.0613   | 0.9212  | 2.1404 | Up | 1.73E-05  | 3.57E-05  |
| Unigene12633  | Potri.003G013100.1  | 6.9608   | 1.5801  | 2.1392 | Up | 1.86E-36  | 1.34E-35  |
| Unigene45542  | Potri.013G004100.1  | 10.3154  | 2.3424  | 2.1387 | Up | 2.18E-48  | 2.06E-47  |
| Unigene63221  | Potri.013G018400.2  | 11.2642  | 2.5616  | 2.1366 | Up | 4.44E-43  | 3.74E-42  |
| Unigene46208  | Potri.004G086900.1  | 7.0972   | 1.6142  | 2.1364 | Up | 2.58E-11  | 7.92E-11  |
| Unigene116476 | Potri.001G034200.2  | 134.6735 | 30.671  | 2.1345 | Up | 4.62E-128 | 1.34E-126 |
| Unigene108201 | Potri.006G250900.1  | 177.2183 | 40.3812 | 2.1338 | Up | 7.25E-108 | 1.70E-106 |
| Unigene69538  | Potri.008G145600.1  | 3.1133   | 0.7095  | 2.1336 | Up | 4.69E-07  | 1.11E-06  |
| Unigene63588  | Potri.013G143200.1  | 3.0259   | 0.6896  | 2.1335 | Up | 4.69E-07  | 1.11E-06  |
| Unigene93693  | Potri.004G061200.10 | 3.1083   | 0.7084  | 2.1335 | Up | 4.69E-07  | 1.11E-06  |
| Unigene86742  | Potri.002G198000.1  | 19.0778  | 4.3479  | 2.1335 | Up | 1.39E-18  | 5.85E-18  |
| Unigene14301  | Potri.001G343100.3  | 5.663    | 1.2906  | 2.1335 | Up | 7.54E-13  | 2.49E-12  |
| Unigene14996  | Potri.008G069400.1  | 212.2185 | 48.3746 | 2.1332 | Up | 4.89E-263 | 3.61E-261 |
| Unigene21016  | Potri.012G099600.1  | 12.9041  | 2.9429  | 2.1325 | Up | 1.75E-16  | 6.79E-16  |
| Unigene39088  | Potri.017G129900.6  | 9.8978   | 2.2588  | 2.1316 | Up | 1.01E-23  | 5.08E-23  |
| Unigene51252  | Potri.001G295500.1  | 54.0573  | 12.3468 | 2.1304 | Up | 4.17E-56  | 4.61E-55  |
| Unigene89418  | Potri.018G003100.1  | 3.4673   | 0.7924  | 2.1295 | Up | 6.85E-05  | 1.34E-04  |
| Unigene16737  | Potri.015G038300.1  | 5.4224   | 1.2392  | 2.1295 | Up | 1.31E-08  | 3.44E-08  |
| Unigene5776   | Potri.014G080000.1  | 5.8894   | 1.3459  | 2.1295 | Up | 6.85E-05  | 1.34E-04  |
| Unigene113061 | Potri.011G118100.1  | 4.9235   | 1.1252  | 2.1295 | Up | 6.85E-05  | 1.34E-04  |
| Unigene94000  | Potri.010G059200.1  | 3.4722   | 0.7935  | 2.1295 | Up | 1.31E-08  | 3.44E-08  |
| Unigene70059  | Potri.009G012100.1  | 4.3752   | 0.9999  | 2.1295 | Up | 3.79E-23  | 1.87E-22  |
| Unigene30056  | Potri.T015800.1     | 3.0169   | 0.6895  | 2.1294 | Up | 6.85E-05  | 1.34E-04  |
| Unigene4991   | Potri.004G082200.2  | 156.1751 | 35.7041 | 2.129  | Up | 3.43E-128 | 9.98E-127 |
| Unigene9354   | Potri.014G072100.3  | 6.9882   | 1.5999  | 2.1269 | Up | 3.75E-10  | 1.08E-09  |
| Unigene35822  | Potri.010G104000.1  | 7.5311   | 1.725   | 2.1263 | Up | 2.49E-15  | 9.18E-15  |
| Unigene12796  | Potri.002G131600.1  | 22.5971  | 5.1772  | 2.1259 | Up | 1.48E-44  | 1.29E-43  |
| Unigene6569   | Potri.001G134700.1  | 33.863   | 7.7661  | 2.1244 | Up | 1.70E-45  | 1.51E-44  |
| Unigene16391  | Potri.012G094600.1  | 14.2345  | 3.2659  | 2.1238 | Up | 3.18E-13  | 1.07E-12  |
| Unigene9608   | Potri.011G112300.1  | 6.2766   | 1.4411  | 2.1228 | Up | 9.39E-15  | 3.39E-14  |
| Unigene48141  | Potri.001G320900.1  | 8.8125   | 2.024   | 2.1223 | Up | 1.38E-29  | 8.26E-29  |
| Unigene10147  | Potri.009G041800.1  | 16.2588  | 3.7352  | 2.122  | Up | 2.79E-16  | 1.07E-15  |
| Unigene34965  | Potri.006G115700.1  | 192.7981 | 44.2961 | 2.1218 | Up | 0         | 0         |
| Unigene103173 | Potri.015G065800.1  | 39.6377  | 9.1166  | 2.1203 | Up | 3.47E-40  | 2.73E-39  |
| Unigene21399  | Potri.014G040900.1  | 19.993   | 4.6011  | 2.1194 | Up | 3.78E-127 | 1.09E-125 |
| Unigene15472  | Potri.002G196300.1  | 53.3086  | 12.2689 | 2.1194 | Up | 1.37E-36  | 9.93E-36  |
| Unigene25194  | Potri.T169400.1     | 7.4984   | 1.7262  | 2.119  | Up | 3.55E-14  | 1.25E-13  |

|               |                    |          |         |        |    |           |           |
|---------------|--------------------|----------|---------|--------|----|-----------|-----------|
| Unigene43791  | Potri.T091200.1    | 9.1246   | 2.1012  | 2.1185 | Up | 5.86E-30  | 3.55E-29  |
| Unigene118303 | Potri.008G126800.5 | 272.3918 | 62.7304 | 2.1184 | Up | 0         | 0         |
| Unigene15781  | Potri.T027700.1    | 38.2844  | 8.8195  | 2.118  | Up | 6.94E-69  | 9.58E-68  |
| Unigene31974  | Potri.013G105300.4 | 71.6496  | 16.5071 | 2.1179 | Up | 1.04E-297 | 9.15E-296 |
| Unigene66545  | Potri.018G024300.4 | 25.3355  | 5.8382  | 2.1176 | Up | 1.48E-40  | 1.18E-39  |
| Unigene10904  | Potri.001G348600.1 | 70.9152  | 16.3426 | 2.1175 | Up | 5.86E-284 | 4.80E-282 |
| Unigene86801  | Potri.014G025100.1 | 3.413    | 0.7879  | 2.115  | Up | 2.73E-04  | 5.00E-04  |
| Unigene93404  | Potri.003G176700.1 | 3.6517   | 0.843   | 2.115  | Up | 1.94E-07  | 4.72E-07  |
| Unigene63950  | Potri.014G124200.1 | 5.0576   | 1.1676  | 2.1149 | Up | 1.94E-07  | 4.72E-07  |
| Unigene102239 | Potri.011G018500.1 | 16.246   | 3.7506  | 2.1149 | Up | 4.57E-12  | 1.45E-11  |
| Unigene28414  | Potri.010G227000.1 | 5.9885   | 1.3825  | 2.1149 | Up | 5.48E-09  | 1.47E-08  |
| Unigene62885  | Potri.010G002400.1 | 4.4632   | 1.0304  | 2.1149 | Up | 7.11E-06  | 1.53E-05  |
| Unigene75623  | Potri.008G179700.3 | 4.7044   | 1.0861  | 2.1149 | Up | 2.73E-04  | 5.00E-04  |
| Unigene81002  | Potri.005G221300.1 | 16.5776  | 3.8272  | 2.1149 | Up | 1.34E-13  | 4.60E-13  |
| Unigene86341  | Potri.005G070700.5 | 3.4813   | 0.8037  | 2.1149 | Up | 2.73E-04  | 5.00E-04  |
| Unigene65592  | Potri.003G128800.1 | 4.4005   | 1.0159  | 2.1149 | Up | 7.11E-06  | 1.53E-05  |
| Unigene81591  | Potri.002G036600.1 | 4.0956   | 0.9455  | 2.1149 | Up | 2.73E-04  | 5.00E-04  |
| Unigene76171  | Potri.001G146500.3 | 4.6624   | 1.0764  | 2.1149 | Up | 2.73E-04  | 5.00E-04  |
| Unigene63250  | Potri.015G069000.2 | 3.4019   | 0.7854  | 2.1148 | Up | 2.73E-04  | 5.00E-04  |
| Unigene47186  | Potri.008G053800.1 | 4.1118   | 0.9493  | 2.1148 | Up | 1.94E-07  | 4.72E-07  |
| Unigene27422  | Potri.001G109600.1 | 3.2334   | 0.7465  | 2.1148 | Up | 2.73E-04  | 5.00E-04  |
| Unigene57030  | Potri.002G118400.1 | 8.7859   | 2.0325  | 2.1119 | Up | 3.98E-19  | 1.72E-18  |
| Unigene63091  | Potri.017G035800.3 | 3.5979   | 0.8341  | 2.1089 | Up | 5.99E-10  | 1.71E-09  |
| Unigene5678   | Potri.012G106900.1 | 6.8847   | 1.5961  | 2.1088 | Up | 5.99E-10  | 1.71E-09  |
| Unigene63646  | Potri.014G104200.4 | 7.6241   | 1.7692  | 2.1075 | Up | 2.10E-08  | 5.44E-08  |
| Unigene41465  | Potri.014G075400.1 | 6.1691   | 1.4315  | 2.1075 | Up | 2.10E-08  | 5.44E-08  |
| Unigene35977  | Potri.001G057300.1 | 5.9716   | 1.3857  | 2.1075 | Up | 2.10E-08  | 5.44E-08  |
| Unigene94727  | Potri.001G085800.1 | 20.6944  | 4.8062  | 2.1063 | Up | 1.69E-19  | 7.37E-19  |
| Unigene9105   | Potri.008G007800.1 | 97.9113  | 22.7477 | 2.1058 | Up | 3.47E-159 | 1.34E-157 |
| Unigene104809 | Potri.010G080700.3 | 7.2056   | 1.6744  | 2.1055 | Up | 7.52E-07  | 1.75E-06  |
| Unigene89345  | Potri.006G064300.1 | 5.3889   | 1.2522  | 2.1055 | Up | 7.52E-07  | 1.75E-06  |
| Unigene85142  | Potri.005G044800.5 | 6.6513   | 1.5456  | 2.1055 | Up | 7.52E-07  | 1.75E-06  |
| Unigene23755  | Potri.013G033000.1 | 48.44    | 11.265  | 2.1044 | Up | 4.26E-138 | 1.37E-136 |
| Unigene34565  | Potri.004G087000.3 | 35.5205  | 8.2618  | 2.1041 | Up | 1.01E-63  | 1.28E-62  |
| Unigene6332   | Potri.T059500.1    | 16.0398  | 3.7322  | 2.1036 | Up | 7.22E-38  | 5.39E-37  |
| Unigene15937  | Potri.013G039200.1 | 52.3502  | 12.1865 | 2.1029 | Up | 1.21E-61  | 1.48E-60  |
| Unigene25468  | Potri.014G123400.1 | 12.2618  | 2.8552  | 2.1025 | Up | 7.69E-35  | 5.30E-34  |
| Unigene14902  | Potri.013G022700.2 | 7.7316   | 1.801   | 2.102  | Up | 2.29E-09  | 6.29E-09  |
| Unigene89634  | Potri.008G130200.4 | 3.8336   | 0.893   | 2.102  | Up | 2.79E-05  | 5.66E-05  |



|               |                    |          |        |        |    |           |           |
|---------------|--------------------|----------|--------|--------|----|-----------|-----------|
| Unigene66259  | Potri.005G115100.4 | 3.3416   | 0.7784 | 2.102  | Up | 2.79E-05  | 5.66E-05  |
| Unigene23448  | Potri.018G128400.1 | 13.6538  | 3.1806 | 2.1019 | Up | 3.75E-53  | 3.90E-52  |
| Unigene85053  | Potri.009G160100.7 | 4.8594   | 1.132  | 2.1019 | Up | 2.79E-05  | 5.66E-05  |
| Unigene59611  | Potri.005G139800.1 | 3.6081   | 0.8405 | 2.1019 | Up | 2.29E-09  | 6.29E-09  |
| Unigene54108  | Potri.015G082900.1 | 3.9893   | 0.9312 | 2.099  | Up | 8.07E-08  | 2.01E-07  |
| Unigene3812   | Potri.004G193900.1 | 6.5823   | 1.5365 | 2.0989 | Up | 2.39E-14  | 8.44E-14  |
| Unigene33786  | Potri.010G109900.3 | 16.7888  | 3.9247 | 2.0968 | Up | 3.13E-24  | 1.60E-23  |
| Unigene64836  | Potri.010G107300.1 | 30.2619  | 7.0766 | 2.0964 | Up | 3.75E-29  | 2.22E-28  |
| Unigene32151  | Potri.001G016000.2 | 8.6163   | 2.0154 | 2.096  | Up | 4.55E-34  | 3.08E-33  |
| Unigene114812 | Potri.010G061700.1 | 331.7909 | 77.614 | 2.0959 | Up | 6.27E-264 | 4.65E-262 |
| Unigene90639  | Potri.017G090800.1 | 4.4107   | 1.033  | 2.0942 | Up | 2.92E-06  | 6.47E-06  |
| Unigene88647  | Potri.014G083300.4 | 5.0913   | 1.1924 | 2.0942 | Up | 2.92E-06  | 6.47E-06  |
| Unigene48244  | Potri.005G074400.2 | 4.1344   | 0.9683 | 2.0942 | Up | 2.92E-06  | 6.47E-06  |
| Unigene67512  | Potri.003G157800.2 | 5.2847   | 1.2377 | 2.0942 | Up | 8.75E-09  | 2.33E-08  |
| Unigene91462  | Potri.016G136100.3 | 4.0658   | 0.9523 | 2.0941 | Up | 2.92E-06  | 6.47E-06  |
| Unigene40762  | Potri.015G010900.4 | 4.8929   | 1.146  | 2.0941 | Up | 8.75E-09  | 2.33E-08  |
| Unigene94412  | Potri.004G058000.2 | 4.9877   | 1.1682 | 2.0941 | Up | 2.99E-16  | 1.15E-15  |
| Unigene74629  | Potri.004G010500.2 | 17.3606  | 4.0741 | 2.0913 | Up | 3.06E-12  | 9.84E-12  |
| Unigene28785  | Potri.T057100.1    | 19.6683  | 4.6164 | 2.091  | Up | 2.07E-31  | 1.31E-30  |
| Unigene32644  | Potri.009G163700.3 | 16.4054  | 3.8516 | 2.0906 | Up | 1.44E-45  | 1.28E-44  |
| Unigene69698  | Potri.006G126600.1 | 3.0496   | 0.7161 | 2.0904 | Up | 9.56E-10  | 2.69E-09  |
| Unigene105991 | Potri.006G016200.1 | 14.5054  | 3.4075 | 2.0898 | Up | 1.13E-15  | 4.23E-15  |
| Unigene113333 | Potri.007G128500.1 | 16.2172  | 3.812  | 2.0889 | Up | 3.40E-13  | 1.15E-12  |
| Unigene92235  | Potri.003G095300.7 | 4.4308   | 1.0415 | 2.0889 | Up | 3.11E-07  | 7.45E-07  |
| Unigene32520  | Potri.018G141800.5 | 8.0039   | 1.8837 | 2.0871 | Up | 1.86E-23  | 9.27E-23  |
| Unigene68458  | Potri.017G125100.1 | 4.1444   | 0.9767 | 2.0852 | Up | 1.10E-04  | 2.10E-04  |
| Unigene72463  | Potri.010G136800.1 | 5.7661   | 1.3589 | 2.0852 | Up | 1.10E-04  | 2.10E-04  |
| Unigene34080  | Potri.002G034700.1 | 8.2458   | 1.9433 | 2.0852 | Up | 4.24E-15  | 1.55E-14  |
| Unigene90301  | Potri.009G017000.1 | 3.1576   | 0.7442 | 2.0851 | Up | 1.10E-04  | 2.10E-04  |
| Unigene89791  | Potri.005G235300.1 | 3.2701   | 0.7707 | 2.0851 | Up | 1.10E-04  | 2.10E-04  |
| Unigene97513  | Potri.005G127900.3 | 5.6837   | 1.3395 | 2.0851 | Up | 1.10E-04  | 2.10E-04  |
| Unigene47095  | Potri.001G220900.1 | 3.7068   | 0.8736 | 2.0851 | Up | 3.35E-08  | 8.60E-08  |
| Unigene60910  | Potri.001G162200.1 | 4.7459   | 1.1185 | 2.0851 | Up | 3.35E-08  | 8.60E-08  |
| Unigene33026  | Potri.005G200300.1 | 11.9645  | 2.8216 | 2.0842 | Up | 1.28E-47  | 1.19E-46  |
| Unigene6111   | Potri.005G190200.2 | 17.1398  | 4.0449 | 2.0832 | Up | 7.89E-24  | 3.98E-23  |
| Unigene35636  | Potri.014G097900.2 | 6.4219   | 1.5164 | 2.0823 | Up | 3.65E-09  | 9.92E-09  |
| Unigene64428  | Potri.014G083300.4 | 4.1444   | 0.9801 | 2.0802 | Up | 1.14E-05  | 2.40E-05  |
| Unigene67857  | Potri.009G078500.3 | 5.4617   | 1.2917 | 2.0801 | Up | 1.14E-05  | 2.40E-05  |
| Unigene37016  | Potri.004G048600.1 | 4.3819   | 1.0363 | 2.0801 | Up | 1.14E-05  | 2.40E-05  |

|               |                    |          |         |        |    |           |           |
|---------------|--------------------|----------|---------|--------|----|-----------|-----------|
| Unigene69838  | Potri.003G048700.2 | 3.2677   | 0.7728  | 2.0801 | Up | 1.14E-05  | 2.40E-05  |
| Unigene35877  | Potri.002G175300.2 | 5.0976   | 1.2056  | 2.0801 | Up | 4.00E-10  | 1.15E-09  |
| Unigene17031  | Potri.002G062300.3 | 24.3172  | 5.7509  | 2.0801 | Up | 1.24E-40  | 9.88E-40  |
| Unigene22539  | Potri.008G144700.1 | 7.1815   | 1.6987  | 2.0799 | Up | 3.13E-63  | 3.94E-62  |
| Unigene65905  | Potri.007G044800.1 | 4.3778   | 1.036   | 2.0792 | Up | 7.63E-20  | 3.38E-19  |
| Unigene12697  | Potri.001G350900.1 | 42.6771  | 10.1079 | 2.078  | Up | 5.28E-41  | 4.25E-40  |
| Unigene95423  | Potri.012G105900.2 | 53.3012  | 12.6262 | 2.0777 | Up | 1.49E-51  | 1.51E-50  |
| Unigene33388  | Potri.010G249300.1 | 48.111   | 11.3983 | 2.0775 | Up | 2.33E-67  | 3.15E-66  |
| Unigene22924  | Potri.002G062200.2 | 25.7819  | 6.1089  | 2.0774 | Up | 4.96E-63  | 6.22E-62  |
| Unigene70028  | Potri.006G081500.1 | 15.2508  | 3.6138  | 2.0773 | Up | 1.31E-37  | 9.73E-37  |
| Unigene74633  | Potri.005G172100.1 | 8.5944   | 2.037   | 2.077  | Up | 1.20E-06  | 2.75E-06  |
| Unigene65839  | Potri.014G136600.1 | 3.2099   | 0.7608  | 2.0769 | Up | 4.87E-12  | 1.55E-11  |
| Unigene23921  | Potri.018G104100.1 | 8.0428   | 1.9079  | 2.0757 | Up | 1.42E-24  | 7.33E-24  |
| Unigene52076  | Potri.006G281100.3 | 9.3249   | 2.212   | 2.0757 | Up | 5.41E-13  | 1.80E-12  |
| Unigene19370  | Potri.004G125300.1 | 14.1916  | 3.3668  | 2.0756 | Up | 8.37E-54  | 8.84E-53  |
| Unigene45688  | Potri.014G038700.1 | 33.9963  | 8.0815  | 2.0727 | Up | 1.78E-105 | 4.05E-104 |
| Unigene14818  | Potri.018G025500.1 | 5.7353   | 1.3637  | 2.0723 | Up | 8.47E-17  | 3.33E-16  |
| Unigene24001  | Potri.008G030300.1 | 31.5332  | 7.4997  | 2.072  | Up | 1.88E-65  | 2.47E-64  |
| Unigene38470  | Potri.005G056100.2 | 13.1344  | 3.1242  | 2.0718 | Up | 6.83E-26  | 3.67E-25  |
| Unigene115311 | Potri.001G087500.3 | 336.0858 | 79.9504 | 2.0717 | Up | 7.97E-273 | 6.17E-271 |
| Unigene26242  | Potri.T027700.1    | 9.3249   | 2.2208  | 2.07   | Up | 1.85E-11  | 5.70E-11  |
| Unigene40421  | Potri.006G101400.1 | 11.1781  | 2.6621  | 2.07   | Up | 1.85E-11  | 5.70E-11  |
| Unigene108703 | Potri.001G149800.1 | 104.9384 | 24.9956 | 2.0698 | Up | 2.25E-63  | 2.84E-62  |
| Unigene114264 | Potri.006G250900.1 | 251.0385 | 60.052  | 2.0636 | Up | 3.00E-189 | 1.46E-187 |
| Unigene87909  | Potri.014G020200.1 | 6.2166   | 1.4883  | 2.0625 | Up | 4.97E-07  | 1.17E-06  |
| Unigene15166  | Potri.008G044400.1 | 3.4139   | 0.8173  | 2.0625 | Up | 4.40E-04  | 7.85E-04  |
| Unigene15687  | Potri.003G111700.4 | 3.5213   | 0.843   | 2.0625 | Up | 4.97E-07  | 1.17E-06  |
| Unigene48385  | Potri.001G304800.1 | 4.205    | 1.0067  | 2.0625 | Up | 8.59E-13  | 2.83E-12  |
| Unigene20090  | Potri.014G039500.1 | 10.7518  | 2.5741  | 2.0624 | Up | 6.36E-10  | 1.81E-09  |
| Unigene92841  | Potri.010G127000.3 | 9.8734   | 2.3638  | 2.0624 | Up | 1.20E-15  | 4.48E-15  |
| Unigene54230  | Potri.010G065900.1 | 5.3116   | 1.2717  | 2.0624 | Up | 1.20E-15  | 4.48E-15  |
| Unigene41195  | Potri.009G112400.1 | 3.3155   | 0.7938  | 2.0624 | Up | 4.47E-05  | 8.90E-05  |
| Unigene47232  | Potri.009G027800.4 | 4.0773   | 0.9762  | 2.0624 | Up | 4.40E-04  | 7.85E-04  |
| Unigene86978  | Potri.008G212000.1 | 3.2592   | 0.7803  | 2.0624 | Up | 4.40E-04  | 7.85E-04  |
| Unigene84994  | Potri.008G109500.1 | 4.7281   | 1.132   | 2.0624 | Up | 4.47E-05  | 8.90E-05  |
| Unigene67993  | Potri.006G250000.3 | 3.1026   | 0.7428  | 2.0624 | Up | 4.67E-06  | 1.02E-05  |
| Unigene73386  | Potri.004G082200.3 | 4.7729   | 1.1427  | 2.0624 | Up | 4.40E-04  | 7.85E-04  |
| Unigene86321  | Potri.001G148800.1 | 3.357    | 0.8037  | 2.0624 | Up | 4.40E-04  | 7.85E-04  |
| Unigene91145  | Potri.010G039900.1 | 4.124    | 0.9874  | 2.0623 | Up | 4.67E-06  | 1.02E-05  |

|               |                    |          |         |        |    |           |           |
|---------------|--------------------|----------|---------|--------|----|-----------|-----------|
| Unigene117476 | Potri.011G010300.8 | 76.0337  | 18.2158 | 2.0614 | Up | 4.08E-79  | 6.62E-78  |
| Unigene15572  | Potri.002G198000.1 | 48.0664  | 11.517  | 2.0613 | Up | 6.61E-67  | 8.86E-66  |
| Unigene25508  | Potri.001G145500.1 | 87.2568  | 20.933  | 2.0595 | Up | 8.73E-258 | 6.29E-256 |
| Unigene15311  | Potri.004G118600.1 | 41.3725  | 9.9308  | 2.0587 | Up | 6.84E-42  | 5.61E-41  |
| Unigene21106  | Potri.016G045600.2 | 10.6832  | 2.565   | 2.0583 | Up | 8.10E-20  | 3.58E-19  |
| Unigene35976  | Potri.010G249300.1 | 51.3343  | 12.328  | 2.058  | Up | 3.14E-86  | 5.61E-85  |
| Unigene30186  | Potri.019G131400.7 | 26.0393  | 6.2552  | 2.0576 | Up | 5.66E-17  | 2.25E-16  |
| Unigene9302   | Potri.009G016800.1 | 6.9004   | 1.6576  | 2.0576 | Up | 5.66E-17  | 2.25E-16  |
| Unigene31866  | Potri.001G155800.1 | 51.4669  | 12.3658 | 2.0573 | Up | 0         | 0         |
| Unigene98120  | Potri.001G133000.2 | 8.543    | 2.0545  | 2.056  | Up | 3.61E-13  | 1.21E-12  |
| Unigene66681  | Potri.002G127400.1 | 4.2141   | 1.0143  | 2.0547 | Up | 2.93E-11  | 8.95E-11  |
| Unigene27115  | Potri.018G100400.1 | 77.7074  | 18.7137 | 2.054  | Up | 7.90E-46  | 7.06E-45  |
| Unigene48535  | Potri.002G154100.4 | 7.1568   | 1.7235  | 2.054  | Up | 2.65E-10  | 7.70E-10  |
| Unigene67412  | Potri.017G114000.5 | 7.044    | 1.6985  | 2.0521 | Up | 2.10E-23  | 1.04E-22  |
| Unigene15953  | Potri.010G042600.1 | 8.7687   | 2.115   | 2.0517 | Up | 2.22E-08  | 5.74E-08  |
| Unigene37412  | Potri.015G076400.1 | 121.1218 | 29.2256 | 2.0512 | Up | 2.96E-94  | 5.86E-93  |
| Unigene49639  | Potri.006G037600.1 | 12.9973  | 3.1361  | 2.0512 | Up | 1.64E-21  | 7.66E-21  |
| Unigene48413  | Potri.014G124300.2 | 4.6624   | 1.1259  | 2.05   | Up | 2.05E-07  | 4.98E-07  |
| Unigene12576  | Potri.005G086100.1 | 7.3335   | 1.7709  | 2.05   | Up | 1.52E-13  | 5.18E-13  |
| Unigene93102  | Potri.003G144400.3 | 4.0513   | 0.9783  | 2.05   | Up | 2.05E-07  | 4.98E-07  |
| Unigene25674  | Potri.006G016200.1 | 81.9933  | 19.8271 | 2.048  | Up | 2.50E-53  | 2.61E-52  |
| Unigene69202  | Potri.015G002300.1 | 3.3909   | 0.8201  | 2.0478 | Up | 1.92E-06  | 4.32E-06  |
| Unigene28252  | Potri.003G198300.2 | 5.9148   | 1.4305  | 2.0478 | Up | 1.92E-06  | 4.32E-06  |
| Unigene13628  | Potri.006G242200.1 | 18.9589  | 4.5884  | 2.0468 | Up | 3.45E-30  | 2.10E-29  |
| Unigene116786 | Potri.008G134000.1 | 138.5251 | 33.528  | 2.0467 | Up | 4.34E-129 | 1.28E-127 |
| Unigene1278   | Potri.006G227700.4 | 9.4041   | 2.2768  | 2.0463 | Up | 1.11E-10  | 3.29E-10  |
| Unigene113300 | Potri.010G062900.1 | 256.3791 | 62.1044 | 2.0455 | Up | 3.77E-181 | 1.73E-179 |
| Unigene7401   | Potri.019G019000.1 | 31.2866  | 7.5841  | 2.0445 | Up | 9.03E-68  | 1.23E-66  |
| Unigene92499  | Potri.006G141800.1 | 3.1018   | 0.7519  | 2.0445 | Up | 1.82E-05  | 3.75E-05  |
| Unigene58369  | Potri.005G174600.2 | 5.8281   | 1.4128  | 2.0445 | Up | 1.01E-09  | 2.83E-09  |
| Unigene111830 | Potri.016G142900.2 | 195.1904 | 47.3368 | 2.0438 | Up | 4.58E-129 | 1.35E-127 |
| Unigene23078  | Potri.019G053600.2 | 14.9655  | 3.6308  | 2.0433 | Up | 1.13E-28  | 6.58E-28  |
| Unigene58422  | Potri.016G089700.1 | 5.156    | 1.2511  | 2.0431 | Up | 5.71E-13  | 1.90E-12  |
| Unigene21250  | Potri.001G001500.1 | 36.735   | 8.9137  | 2.0431 | Up | 4.24E-196 | 2.16E-194 |
| Unigene52358  | Potri.T141600.1    | 15.861   | 3.8495  | 2.0427 | Up | 2.29E-20  | 1.03E-19  |
| Unigene66361  | Potri.018G022300.1 | 6.8079   | 1.6529  | 2.0422 | Up | 9.22E-09  | 2.45E-08  |
| Unigene20639  | Potri.015G049000.1 | 14.1998  | 3.4475  | 2.0422 | Up | 3.36E-16  | 1.29E-15  |
| Unigene66245  | Potri.008G173600.2 | 5.6107   | 1.3622  | 2.0422 | Up | 9.22E-09  | 2.45E-08  |
| Unigene11737  | Potri.002G143800.1 | 6.6131   | 1.6074  | 2.0406 | Up | 1.79E-18  | 7.54E-18  |

|               |                    |          |         |        |    |           |           |
|---------------|--------------------|----------|---------|--------|----|-----------|-----------|
| Unigene63811  | Potri.010G157800.4 | 3.3227   | 0.8083  | 2.0394 | Up | 1.77E-04  | 3.30E-04  |
| Unigene51044  | Potri.015G071800.2 | 5.6404   | 1.3722  | 2.0393 | Up | 8.49E-08  | 2.11E-07  |
| Unigene80120  | Potri.008G195200.8 | 4.7003   | 1.1435  | 2.0393 | Up | 1.77E-04  | 3.30E-04  |
| Unigene3871   | Potri.004G205100.2 | 10.7064  | 2.6046  | 2.0393 | Up | 8.49E-08  | 2.11E-07  |
| Unigene93705  | Potri.010G128700.1 | 6.8522   | 1.669   | 2.0376 | Up | 2.40E-13  | 8.12E-13  |
| Unigene55999  | Potri.015G016500.1 | 14.4385  | 3.5185  | 2.0369 | Up | 4.21E-10  | 1.21E-09  |
| Unigene12509  | Potri.004G187700.1 | 74.5248  | 18.1714 | 2.0361 | Up | 1.18E-104 | 2.67E-103 |
| Unigene21474  | Potri.004G201500.1 | 21.671   | 5.2862  | 2.0355 | Up | 1.17E-50  | 1.16E-49  |
| Unigene93533  | Potri.008G004400.1 | 3.3225   | 0.8105  | 2.0354 | Up | 7.90E-07  | 1.83E-06  |
| Unigene259    | Potri.011G083100.1 | 11.0548  | 2.6979  | 2.0348 | Up | 1.53E-70  | 2.17E-69  |
| Unigene108807 | Potri.008G112700.1 | 186.4977 | 45.5432 | 2.0339 | Up | 2.54E-109 | 6.07E-108 |
| Unigene49504  | Potri.015G078200.1 | 14.5229  | 3.5472  | 2.0336 | Up | 1.11E-34  | 7.61E-34  |
| Unigene114719 | Potri.005G256600.1 | 69.9875  | 17.097  | 2.0334 | Up | 1.36E-54  | 1.46E-53  |
| Unigene13709  | Potri.001G128200.1 | 24.6865  | 6.0314  | 2.0332 | Up | 1.01E-76  | 1.58E-75  |
| Unigene65372  | Potri.009G013000.1 | 3.3562   | 0.8218  | 2.03   | Up | 7.44E-06  | 1.60E-05  |
| Unigene4520   | Potri.001G297200.2 | 16.5219  | 4.0455  | 2.03   | Up | 4.73E-15  | 1.73E-14  |
| Unigene43375  | Potri.012G123600.1 | 77.0952  | 18.8901 | 2.029  | Up | 0         | 0         |
| Unigene24119  | Potri.016G066800.1 | 46.8872  | 11.4894 | 2.0289 | Up | 1.93E-188 | 9.36E-187 |
| Unigene27766  | Potri.002G168600.1 | 15.768   | 3.8662  | 2.028  | Up | 2.23E-16  | 8.63E-16  |
| Unigene20387  | Potri.009G032800.1 | 41.2152  | 10.1139 | 2.0268 | Up | 1.70E-85  | 3.01E-84  |
| Unigene36363  | Potri.004G129200.3 | 11.204   | 2.7503  | 2.0264 | Up | 1.60E-09  | 4.43E-09  |
| Unigene65975  | Potri.008G104900.1 | 8.4432   | 2.0726  | 2.0263 | Up | 1.60E-09  | 4.43E-09  |
| Unigene20899  | Potri.008G080800.5 | 9.9549   | 2.4437  | 2.0263 | Up | 1.60E-09  | 4.43E-09  |
| Unigene62629  | Potri.004G174500.1 | 9.8881   | 2.4273  | 2.0263 | Up | 1.60E-09  | 4.43E-09  |
| Unigene65193  | Potri.002G131400.1 | 6.821    | 1.6744  | 2.0263 | Up | 1.60E-09  | 4.43E-09  |
| Unigene33192  | Potri.010G118900.4 | 13.2281  | 3.2478  | 2.0261 | Up | 1.17E-31  | 7.45E-31  |
| Unigene51523  | Potri.006G178900.1 | 96.9348  | 23.8266 | 2.0244 | Up | 1.78E-91  | 3.40E-90  |
| Unigene21274  | Potri.008G165400.5 | 10.0439  | 2.4692  | 2.0242 | Up | 3.02E-47  | 2.78E-46  |
| Unigene33012  | Potri.014G113500.1 | 17.4165  | 4.2843  | 2.0233 | Up | 6.45E-37  | 4.70E-36  |
| Unigene25717  | Potri.006G145600.1 | 39.0564  | 9.6095  | 2.023  | Up | 4.35E-31  | 2.72E-30  |
| Unigene86711  | Potri.014G083300.3 | 4.2803   | 1.054   | 2.0218 | Up | 7.14E-05  | 1.39E-04  |
| Unigene770    | Potri.010G148200.6 | 55.0612  | 13.5591 | 2.0218 | Up | 4.77E-112 | 1.18E-110 |
| Unigene72779  | Potri.009G104400.1 | 6.2764   | 1.5456  | 2.0218 | Up | 7.14E-05  | 1.39E-04  |
| Unigene63350  | Potri.008G101300.1 | 3.4537   | 0.8505  | 2.0218 | Up | 7.14E-05  | 1.39E-04  |
| Unigene48274  | Potri.010G214600.1 | 5.4852   | 1.3508  | 2.0217 | Up | 7.14E-05  | 1.39E-04  |
| Unigene86912  | Potri.006G188600.2 | 4.2386   | 1.0438  | 2.0217 | Up | 7.14E-05  | 1.39E-04  |
| Unigene64788  | Potri.006G049100.2 | 4.0169   | 0.9892  | 2.0217 | Up | 7.14E-05  | 1.39E-04  |
| Unigene47266  | Potri.005G201200.1 | 4.5017   | 1.1086  | 2.0217 | Up | 3.40E-12  | 1.09E-11  |
| Unigene117144 | Potri.019G018900.3 | 186.4977 | 45.9756 | 2.0202 | Up | 7.18E-178 | 3.21E-176 |

|               |                    |          |         |        |    |           |           |
|---------------|--------------------|----------|---------|--------|----|-----------|-----------|
| Unigene22888  | Potri.T093900.4    | 17.5403  | 4.3259  | 2.0196 | Up | 1.88E-18  | 7.90E-18  |
| Unigene47122  | Potri.005G207300.1 | 102.6578 | 25.342  | 2.0182 | Up | 9.95E-64  | 1.26E-62  |
| Unigene78002  | Potri.001G383000.8 | 7.6512   | 1.889   | 2.0181 | Up | 3.05E-06  | 6.75E-06  |
| Unigene1607   | Potri.T012300.1    | 20.0202  | 4.9429  | 2.018  | Up | 8.86E-36  | 6.27E-35  |
| Unigene20391  | Potri.004G104800.5 | 5.6125   | 1.3857  | 2.018  | Up | 3.05E-06  | 6.75E-06  |
| Unigene69699  | Potri.016G066200.1 | 12.5397  | 3.0978  | 2.0172 | Up | 1.67E-17  | 6.75E-17  |
| Unigene45987  | Potri.008G140800.1 | 5.8247   | 1.4393  | 2.0168 | Up | 1.42E-12  | 4.65E-12  |
| Unigene64015  | Potri.006G253100.1 | 3.658    | 0.9045  | 2.0159 | Up | 1.35E-07  | 3.31E-07  |
| Unigene47100  | Potri.002G199400.1 | 3.9801   | 0.9841  | 2.0159 | Up | 3.78E-20  | 1.69E-19  |
| Unigene93099  | Potri.002G134700.1 | 4.2608   | 1.0535  | 2.0159 | Up | 1.35E-07  | 3.31E-07  |
| Unigene94036  | Potri.002G221500.1 | 3.1645   | 0.7825  | 2.0158 | Up | 1.35E-07  | 3.31E-07  |
| Unigene40082  | Potri.010G127000.3 | 18.9076  | 4.6759  | 2.0157 | Up | 2.76E-46  | 2.49E-45  |
| Unigene30282  | Potri.018G132500.1 | 7.0412   | 1.7427  | 2.0145 | Up | 6.07E-09  | 1.62E-08  |
| Unigene18871  | Potri.011G112300.1 | 12.1326  | 3.0029  | 2.0145 | Up | 1.23E-31  | 7.80E-31  |
| Unigene52950  | Potri.006G085200.2 | 125.7454 | 31.1412 | 2.0136 | Up | 1.21E-148 | 4.30E-147 |
| Unigene74970  | Potri.018G100700.4 | 19.3342  | 4.7927  | 2.0122 | Up | 5.97E-13  | 1.98E-12  |
| Unigene112240 | Potri.005G163600.1 | 52.467   | 13.006  | 2.0122 | Up | 5.90E-36  | 4.19E-35  |
| Unigene62797  | Potri.001G235700.1 | 7.7032   | 1.911   | 2.0111 | Up | 6.23E-17  | 2.47E-16  |
| Unigene19757  | Potri.001G239300.1 | 23.4009  | 5.8062  | 2.0109 | Up | 2.96E-18  | 1.23E-17  |
| Unigene23144  | Potri.004G154600.1 | 17.4884  | 4.3424  | 2.0098 | Up | 2.14E-53  | 2.25E-52  |
| Unigene48333  | Potri.T086800.1    | 4.8897   | 1.2157  | 2.008  | Up | 2.52E-09  | 6.93E-09  |
| Unigene3925   | Potri.014G035800.7 | 4.435    | 1.1026  | 2.008  | Up | 2.90E-05  | 5.86E-05  |
| Unigene98228  | Potri.011G018500.1 | 18.3805  | 4.5698  | 2.008  | Up | 3.50E-29  | 2.07E-28  |
| Unigene3863   | Potri.008G075400.3 | 6.9937   | 1.7388  | 2.008  | Up | 2.52E-09  | 6.93E-09  |
| Unigene37039  | Potri.005G127900.2 | 4.8684   | 1.2104  | 2.008  | Up | 5.57E-08  | 1.40E-07  |
| Unigene101749 | Potri.004G010500.1 | 66.882   | 16.6284 | 2.008  | Up | 6.84E-49  | 6.52E-48  |
| Unigene51472  | Potri.003G181200.1 | 5.9133   | 1.4702  | 2.008  | Up | 1.25E-06  | 2.86E-06  |
| Unigene8620   | Potri.002G080800.3 | 8.6847   | 2.1592  | 2.008  | Up | 2.52E-09  | 6.93E-09  |
| Unigene86390  | Potri.002G219200.2 | 6.4438   | 1.6021  | 2.0079 | Up | 1.25E-06  | 2.86E-06  |
| Unigene29971  | Potri.002G143000.5 | 7.547    | 1.8764  | 2.0079 | Up | 1.25E-06  | 2.86E-06  |
| Unigene31542  | Potri.011G080900.2 | 127.8982 | 31.8309 | 2.0065 | Up | 6.94E-133 | 2.13E-131 |
| Unigene38498  | Potri.009G163700.4 | 69.717   | 17.3575 | 2.006  | Up | 1.32E-73  | 1.96E-72  |
| Unigene42340  | Potri.001G062800.1 | 23.9117  | 5.956   | 2.0053 | Up | 8.07E-38  | 6.01E-37  |
| Unigene41591  | Potri.014G129700.2 | 8.93     | 2.2252  | 2.0047 | Up | 3.02E-31  | 1.90E-30  |
| Unigene67674  | Potri.010G187800.1 | 10.9678  | 2.7344  | 2.004  | Up | 5.59E-26  | 3.01E-25  |
| Unigene6261   | Potri.016G126400.1 | 120.0986 | 29.9504 | 2.0036 | Up | 2.13E-122 | 5.87E-121 |
| Unigene46957  | Potri.008G135200.1 | 3.3182   | 0.8275  | 2.0036 | Up | 2.24E-12  | 7.25E-12  |
| Unigene70     | Potri.005G179100.1 | 28.2194  | 7.0403  | 2.003  | Up | 1.55E-117 | 4.07E-116 |
| Unigene40398  | Potri.015G071400.1 | 4.1916   | 1.0472  | 2.001  | Up | 2.31E-08  | 5.96E-08  |

|               |                     |          |         |        |    |           |           |
|---------------|---------------------|----------|---------|--------|----|-----------|-----------|
| Unigene91945  | Potri.009G099000.1  | 5.7576   | 1.4384  | 2.001  | Up | 2.31E-08  | 5.96E-08  |
| Unigene78366  | Potri.006G063100.1  | 8.8507   | 2.2136  | 1.9994 | Up | 5.16E-07  | 1.22E-06  |
| Unigene80150  | Potri.004G202200.1  | 8.491    | 2.1236  | 1.9994 | Up | 5.16E-07  | 1.22E-06  |
| Unigene20164  | Potri.010G156900.1  | 47.1523  | 11.7944 | 1.9992 | Up | 3.64E-62  | 4.50E-61  |
| Unigene34547  | Potri.010G090400.1  | 19.8859  | 4.9797  | 1.9976 | Up | 9.63E-39  | 7.32E-38  |
| Unigene116263 | Potri.001G041800.6  | 281.9512 | 70.613  | 1.9974 | Up | 2.59E-238 | 1.67E-236 |
| Unigene96761  | Potri.010G044400.1  | 31.2581  | 7.8295  | 1.9972 | Up | 1.98E-37  | 1.46E-36  |
| Unigene10979  | Potri.005G165900.1  | 79.5663  | 19.933  | 1.997  | Up | 0         | 0         |
| Unigene69997  | Potri.019G072300.1  | 3.525    | 0.8832  | 1.9968 | Up | 1.18E-05  | 2.48E-05  |
| Unigene111786 | Potri.018G136800.1  | 6.7961   | 1.7028  | 1.9968 | Up | 1.18E-05  | 2.48E-05  |
| Unigene48309  | Potri.014G079900.1  | 4.6624   | 1.1682  | 1.9968 | Up | 1.18E-05  | 2.48E-05  |
| Unigene46581  | Potri.011G155200.5  | 22.5106  | 5.64    | 1.9968 | Up | 8.25E-19  | 3.51E-18  |
| Unigene85140  | Potri.005G215500.1  | 5.608    | 1.4051  | 1.9968 | Up | 1.18E-05  | 2.48E-05  |
| Unigene14870  | Potri.008G100100.2  | 30.6315  | 7.6778  | 1.9963 | Up | 2.99E-75  | 4.57E-74  |
| Unigene43015  | Potri.001G273200.1  | 8.4137   | 2.1102  | 1.9954 | Up | 4.16E-51  | 4.15E-50  |
| Unigene49438  | Potri.008G030300.1  | 9.176    | 2.3038  | 1.9938 | Up | 1.51E-35  | 1.06E-34  |
| Unigene12970  | Potri.001G346300.1  | 36.4061  | 9.1439  | 1.9933 | Up | 3.12E-34  | 2.12E-33  |
| Unigene54215  | Potri.001G357700.1  | 3.2155   | 0.8083  | 1.9921 | Up | 2.82E-04  | 5.15E-04  |
| Unigene66113  | Potri.014G002900.2  | 4.8025   | 1.2073  | 1.992  | Up | 2.82E-04  | 5.15E-04  |
| Unigene59441  | Potri.009G138900.1  | 5.7531   | 1.4463  | 1.992  | Up | 2.13E-07  | 5.15E-07  |
| Unigene89069  | Potri.016G120500.1  | 3.2247   | 0.8107  | 1.9919 | Up | 2.82E-04  | 5.15E-04  |
| Unigene7538   | Potri.002G189600.1  | 16.3794  | 4.1234  | 1.99   | Up | 4.97E-52  | 5.06E-51  |
| Unigene55035  | Potri.004G209700.14 | 7.8258   | 1.9709  | 1.9894 | Up | 3.98E-09  | 1.08E-08  |
| Unigene54715  | Potri.010G227700.1  | 6.5423   | 1.6477  | 1.9893 | Up | 3.98E-09  | 1.08E-08  |
| Unigene94730  | Potri.012G102200.1  | 55.8706  | 14.0733 | 1.9891 | Up | 4.87E-37  | 3.56E-36  |
| Unigene108529 | Potri.006G262700.2  | 153.3227 | 38.6396 | 1.9884 | Up | 8.26E-87  | 1.48E-85  |
| Unigene15518  | Potri.013G105300.4  | 81.467   | 20.5391 | 1.9878 | Up | 3.59E-70  | 5.06E-69  |
| Unigene37551  | Potri.012G115800.1  | 4.9945   | 1.2594  | 1.9876 | Up | 4.83E-06  | 1.05E-05  |
| Unigene52463  | Potri.009G034800.2  | 30.7055  | 7.75    | 1.9862 | Up | 1.58E-47  | 1.47E-46  |
| Unigene23214  | Potri.006G110500.1  | 32.5231  | 8.2105  | 1.9859 | Up | 6.17E-62  | 7.59E-61  |
| Unigene10496  | Potri.005G198900.3  | 11.7595  | 2.9694  | 1.9856 | Up | 2.90E-14  | 1.02E-13  |
| Unigene28553  | Potri.008G178700.1  | 6.185    | 1.5639  | 1.9836 | Up | 3.17E-11  | 9.69E-11  |
| Unigene10034  | Potri.005G220900.2  | 31.9564  | 8.0813  | 1.9834 | Up | 1.58E-32  | 1.03E-31  |
| Unigene28580  | Potri.003G095200.2  | 8.1463   | 2.064   | 1.9807 | Up | 3.90E-50  | 3.82E-49  |
| Unigene35641  | Potri.010G073300.1  | 12.767   | 3.2364  | 1.98   | Up | 1.01E-16  | 3.98E-16  |
| Unigene24543  | Potri.010G066600.1  | 4.7856   | 1.2131  | 1.98   | Up | 1.14E-04  | 2.16E-04  |
| Unigene69637  | Potri.001G252600.1  | 6.1117   | 1.5493  | 1.98   | Up | 3.64E-08  | 9.30E-08  |
| Unigene2006   | Potri.010G115800.1  | 18.6194  | 4.72    | 1.9799 | Up | 5.84E-32  | 3.75E-31  |
| Unigene43945  | Potri.018G146500.1  | 13.7004  | 3.4776  | 1.9781 | Up | 1.72E-20  | 7.76E-20  |

|               |                     |          |         |        |    |           |           |
|---------------|---------------------|----------|---------|--------|----|-----------|-----------|
| Unigene21545  | Potri.015G025200.1  | 41.3305  | 10.4905 | 1.9781 | Up | 1.08E-157 | 4.14E-156 |
| Unigene7014   | Potri.017G090600.1  | 30.899   | 7.8468  | 1.9774 | Up | 3.35E-43  | 2.83E-42  |
| Unigene67369  | Potri.001G229300.1  | 6.7064   | 1.7048  | 1.9759 | Up | 2.87E-10  | 8.31E-10  |
| Unigene26574  | Potri.014G090300.1  | 5.8509   | 1.4883  | 1.975  | Up | 1.51E-08  | 3.95E-08  |
| Unigene3493   | Potri.010G127000.3  | 12.2071  | 3.1052  | 1.975  | Up | 1.51E-08  | 3.95E-08  |
| Unigene22346  | Potri.009G046800.1  | 4.8652   | 1.2376  | 1.975  | Up | 1.51E-08  | 3.95E-08  |
| Unigene41670  | Potri.001G049900.5  | 6.5342   | 1.6622  | 1.9749 | Up | 1.51E-08  | 3.95E-08  |
| Unigene28404  | Potri.014G071000.1  | 27.9915  | 7.1214  | 1.9748 | Up | 1.23E-42  | 1.03E-41  |
| Unigene39947  | Potri.005G083000.1  | 11.2787  | 2.8704  | 1.9743 | Up | 4.55E-14  | 1.59E-13  |
| Unigene90245  | Potri.012G020000.1  | 5.4561   | 1.3894  | 1.9734 | Up | 8.14E-07  | 1.89E-06  |
| Unigene30100  | Potri.006G155700.1  | 6.9073   | 1.7589  | 1.9734 | Up | 8.14E-07  | 1.89E-06  |
| Unigene38643  | Potri.011G081500.3  | 7.2722   | 1.8534  | 1.9722 | Up | 1.19E-10  | 3.54E-10  |
| Unigene26881  | Potri.005G196700.2  | 11.5244  | 2.9371  | 1.9722 | Up | 1.19E-10  | 3.54E-10  |
| Unigene34071  | Potri.011G052700.2  | 4.2437   | 1.0828  | 1.9706 | Up | 4.60E-05  | 9.13E-05  |
| Unigene91049  | Potri.003G008800.2  | 3.5171   | 0.8974  | 1.9706 | Up | 4.60E-05  | 9.13E-05  |
| Unigene19330  | Potri.010G201300.2  | 6.0059   | 1.5325  | 1.9705 | Up | 4.60E-05  | 9.13E-05  |
| Unigene44547  | Potri.011G062600.1  | 4.7482   | 1.2124  | 1.9695 | Up | 1.34E-18  | 5.64E-18  |
| Unigene26985  | Potri.003G178700.1  | 12.1044  | 3.0912  | 1.9693 | Up | 8.00E-15  | 2.89E-14  |
| Unigene22646  | Potri.003G100200.1  | 9.3805   | 2.3967  | 1.9686 | Up | 1.68E-26  | 9.19E-26  |
| Unigene18549  | Potri.001G222200.5  | 15.246   | 3.8963  | 1.9683 | Up | 9.64E-23  | 4.69E-22  |
| Unigene60111  | Potri.013G023100.2  | 4.0379   | 1.0323  | 1.9677 | Up | 3.35E-07  | 8.00E-07  |
| Unigene91910  | Potri.001G163200.1  | 4.9453   | 1.2643  | 1.9677 | Up | 3.35E-07  | 8.00E-07  |
| Unigene14474  | Potri.013G102300.3  | 15.1833  | 3.8841  | 1.9668 | Up | 4.06E-23  | 2.00E-22  |
| Unigene30936  | Potri.001G200500.1  | 6.7817   | 1.7353  | 1.9665 | Up | 2.60E-09  | 7.13E-09  |
| Unigene92711  | Potri.004G178000.2  | 9.156    | 2.3448  | 1.9653 | Up | 1.70E-13  | 5.80E-13  |
| Unigene6361   | Potri.004G010500.1  | 40.1187  | 10.2799 | 1.9644 | Up | 6.17E-38  | 4.61E-37  |
| Unigene48101  | Potri.015G044500.1  | 39.5132  | 10.1357 | 1.9629 | Up | 1.27E-36  | 9.19E-36  |
| Unigene30080  | Potri.010G066400.2  | 6.7235   | 1.7247  | 1.9629 | Up | 1.87E-05  | 3.85E-05  |
| Unigene87030  | Potri.008G018300.3  | 5.0535   | 1.2963  | 1.9629 | Up | 1.87E-05  | 3.85E-05  |
| Unigene11953  | Potri.006G165600.4  | 6.1839   | 1.5863  | 1.9629 | Up | 1.38E-07  | 3.40E-07  |
| Unigene92757  | Potri.004G209700.17 | 3.1207   | 0.8005  | 1.9629 | Up | 1.87E-05  | 3.85E-05  |
| Unigene31114  | Potri.003G217800.1  | 9.1997   | 2.3599  | 1.9629 | Up | 5.92E-16  | 2.25E-15  |
| Unigene118983 | Potri.015G091800.4  | 174.2718 | 44.7246 | 1.9622 | Up | 3.74E-248 | 2.56E-246 |
| Unigene21695  | Potri.014G058800.1  | 7.6818   | 1.9719  | 1.9619 | Up | 9.53E-29  | 5.58E-28  |
| Unigene44552  | Potri.003G096100.1  | 6.674    | 1.7136  | 1.9615 | Up | 1.51E-22  | 7.28E-22  |
| Unigene56297  | Potri.001G061800.1  | 6.6532   | 1.7084  | 1.9614 | Up | 1.77E-20  | 8.00E-20  |
| Unigene102648 | Potri.018G063000.2  | 9.916    | 2.5475  | 1.9607 | Up | 2.99E-14  | 1.05E-13  |
| Unigene41617  | Potri.006G001200.1  | 6.68     | 1.717   | 1.96   | Up | 7.45E-21  | 3.41E-20  |
| Unigene91751  | Potri.003G091000.6  | 5.7187   | 1.4713  | 1.9586 | Up | 5.72E-08  | 1.44E-07  |

|               |                    |          |         |        |    |           |           |
|---------------|--------------------|----------|---------|--------|----|-----------|-----------|
| Unigene98327  | Potri.015G022700.1 | 61.6978  | 15.885  | 1.9576 | Up | 2.91E-70  | 4.10E-69  |
| Unigene25109  | Potri.011G031600.2 | 101.2921 | 26.0918 | 1.9569 | Up | 1.47E-57  | 1.66E-56  |
| Unigene65657  | Potri.T093900.6    | 6.0203   | 1.551   | 1.9566 | Up | 1.87E-10  | 5.48E-10  |
| Unigene23846  | Potri.013G029500.1 | 135.7646 | 35.0017 | 1.9556 | Up | 8.09E-279 | 6.43E-277 |
| Unigene5683   | Potri.002G170000.1 | 3.9526   | 1.0196  | 1.9548 | Up | 2.37E-08  | 6.11E-08  |
| Unigene33476  | Potri.004G075600.1 | 8.3915   | 2.1674  | 1.953  | Up | 1.03E-46  | 9.42E-46  |
| Unigene38510  | Potri.002G003000.6 | 110.4611 | 28.5291 | 1.953  | Up | 1.53E-143 | 5.15E-142 |
| Unigene118398 | Potri.014G056700.5 | 14.5955  | 3.7702  | 1.9528 | Up | 3.26E-18  | 1.36E-17  |
| Unigene43091  | Potri.005G220100.1 | 15.3052  | 3.9559  | 1.9519 | Up | 1.35E-42  | 1.12E-41  |
| Unigene93275  | Potri.004G074600.1 | 3.3664   | 0.8704  | 1.9515 | Up | 3.12E-06  | 6.90E-06  |
| Unigene12757  | Potri.014G188100.1 | 13.9961  | 3.6189  | 1.9514 | Up | 4.90E-21  | 2.26E-20  |
| Unigene14719  | Potri.006G233100.1 | 4.9078   | 1.269   | 1.9514 | Up | 3.12E-06  | 6.90E-06  |
| Unigene30965  | Potri.019G082500.1 | 57.1018  | 14.7873 | 1.9492 | Up | 1.48E-54  | 1.59E-53  |
| Unigene15610  | Potri.002G204000.4 | 6.5526   | 1.697   | 1.9491 | Up | 1.36E-11  | 4.23E-11  |
| Unigene68828  | Potri.015G132900.1 | 3.5275   | 0.9149  | 1.947  | Up | 1.28E-06  | 2.92E-06  |
| Unigene65187  | Potri.002G032600.3 | 3.5776   | 0.9279  | 1.947  | Up | 1.28E-06  | 2.92E-06  |
| Unigene65910  | Potri.010G158100.5 | 4.1615   | 1.0794  | 1.9469 | Up | 5.68E-12  | 1.80E-11  |
| Unigene63808  | Potri.006G276900.3 | 6.4557   | 1.6744  | 1.9469 | Up | 1.28E-06  | 2.92E-06  |
| Unigene92631  | Potri.001G219300.2 | 4.1022   | 1.064   | 1.9469 | Up | 1.28E-06  | 2.92E-06  |
| Unigene18515  | Potri.017G077100.1 | 16.7388  | 4.3464  | 1.9453 | Up | 1.90E-47  | 1.76E-46  |
| Unigene44565  | Potri.017G084800.1 | 28.7461  | 7.4655  | 1.9451 | Up | 4.72E-53  | 4.91E-52  |
| Unigene11129  | Potri.001G104300.2 | 10.2391  | 2.6593  | 1.945  | Up | 3.65E-34  | 2.47E-33  |
| Unigene648    | Potri.008G196800.1 | 78.7772  | 20.4738 | 1.944  | Up | 2.64E-227 | 1.60E-225 |
| Unigene12942  | Potri.002G131700.1 | 11.9975  | 3.1183  | 1.9439 | Up | 1.77E-26  | 9.69E-26  |
| Unigene49040  | Potri.014G008300.1 | 11.9248  | 3.0998  | 1.9437 | Up | 6.52E-35  | 4.50E-34  |
| Unigene86425  | Potri.013G015300.1 | 3.5936   | 0.9345  | 1.9432 | Up | 4.48E-04  | 7.97E-04  |
| Unigene10132  | Potri.010G148200.3 | 3.073    | 0.7991  | 1.9432 | Up | 4.48E-04  | 7.97E-04  |
| Unigene63910  | Potri.008G022100.1 | 3.7044   | 0.9633  | 1.9432 | Up | 4.48E-04  | 7.97E-04  |
| Unigene85417  | Potri.002G159700.1 | 3.7429   | 0.9733  | 1.9432 | Up | 4.48E-04  | 7.97E-04  |
| Unigene56382  | Potri.010G115000.6 | 3.4559   | 0.8987  | 1.9431 | Up | 4.48E-04  | 7.97E-04  |
| Unigene4986   | Potri.007G010800.6 | 4.1845   | 1.0882  | 1.9431 | Up | 5.27E-07  | 1.24E-06  |
| Unigene6366   | Potri.007G003500.1 | 8.3367   | 2.168   | 1.9431 | Up | 9.93E-13  | 3.26E-12  |
| Unigene24968  | Potri.004G209300.1 | 4.0818   | 1.0615  | 1.9431 | Up | 7.04E-10  | 2.00E-09  |
| Unigene87578  | Potri.001G324400.2 | 3.4015   | 0.8846  | 1.9431 | Up | 4.48E-04  | 7.97E-04  |
| Unigene85632  | Potri.019G132800.2 | 3.7171   | 0.9667  | 1.943  | Up | 4.48E-04  | 7.97E-04  |
| Unigene20956  | Potri.015G074000.1 | 3.1353   | 0.8154  | 1.943  | Up | 4.48E-04  | 7.97E-04  |
| Unigene89459  | Potri.012G082600.3 | 3.0384   | 0.7902  | 1.943  | Up | 4.48E-04  | 7.97E-04  |
| Unigene115001 | Potri.008G069400.1 | 197.5544 | 51.3797 | 1.943  | Up | 8.62E-145 | 2.94E-143 |
| Unigene68812  | Potri.012G096500.2 | 3.6942   | 0.9629  | 1.9398 | Up | 2.17E-07  | 5.25E-07  |



|               |                    |          |         |        |    |           |           |
|---------------|--------------------|----------|---------|--------|----|-----------|-----------|
| Unigene37703  | Potri.005G246200.1 | 5.7384   | 1.4957  | 1.9398 | Up | 2.17E-07  | 5.25E-07  |
| Unigene94768  | Potri.011G150700.2 | 35.5157  | 9.2601  | 1.9394 | Up | 1.01E-22  | 4.93E-22  |
| Unigene44878  | Potri.013G142100.1 | 7.4442   | 1.9417  | 1.9388 | Up | 1.22E-10  | 3.61E-10  |
| Unigene19056  | Potri.006G139700.1 | 4.5461   | 1.1868  | 1.9376 | Up | 7.55E-30  | 4.57E-29  |
| Unigene75675  | Potri.006G246200.2 | 5.5445   | 1.4481  | 1.9369 | Up | 1.80E-04  | 3.35E-04  |
| Unigene57797  | Potri.006G242200.1 | 5.6463   | 1.4747  | 1.9369 | Up | 1.80E-04  | 3.35E-04  |
| Unigene51757  | Potri.018G069200.6 | 43.6313  | 11.4106 | 1.935  | Up | 4.40E-38  | 3.29E-37  |
| Unigene22086  | Potri.018G037200.1 | 28.0414  | 7.3369  | 1.9343 | Up | 3.51E-62  | 4.34E-61  |
| Unigene44265  | Potri.006G044600.5 | 5.8938   | 1.5421  | 1.9343 | Up | 3.71E-08  | 9.48E-08  |
| Unigene50487  | Potri.002G051900.1 | 9.1936   | 2.4055  | 1.9343 | Up | 5.37E-15  | 1.96E-14  |
| Unigene116142 | Potri.002G163100.1 | 326.4012 | 85.4423 | 1.9336 | Up | 1.01E-260 | 7.39E-259 |
| Unigene13985  | Potri.010G080300.1 | 119.305  | 31.2445 | 1.933  | Up | 7.68E-130 | 2.28E-128 |
| Unigene119342 | Potri.008G131400.1 | 303.359  | 79.4506 | 1.9329 | Up | 0         | 0         |
| Unigene12629  | Potri.006G280600.1 | 35.912   | 9.4088  | 1.9324 | Up | 7.08E-44  | 6.06E-43  |
| Unigene2009   | Potri.004G002900.1 | 66.7406  | 17.4852 | 1.9324 | Up | 5.27E-114 | 1.33E-112 |
| Unigene67142  | Potri.008G005800.1 | 7.2256   | 1.8935  | 1.9321 | Up | 1.54E-08  | 4.02E-08  |
| Unigene85673  | Potri.018G076600.9 | 4.7263   | 1.2386  | 1.932  | Up | 7.25E-05  | 1.41E-04  |
| Unigene53226  | Potri.016G088600.2 | 10.6983  | 2.8036  | 1.932  | Up | 1.54E-08  | 4.02E-08  |
| Unigene81650  | Potri.011G053000.1 | 5.391    | 1.4128  | 1.932  | Up | 7.25E-05  | 1.41E-04  |
| Unigene16197  | Potri.010G161200.1 | 5.0003   | 1.3104  | 1.932  | Up | 7.25E-05  | 1.41E-04  |
| Unigene58738  | Potri.009G109400.1 | 6.419    | 1.6822  | 1.932  | Up | 1.54E-08  | 4.02E-08  |
| Unigene50937  | Potri.009G032800.1 | 10.535   | 2.7608  | 1.932  | Up | 1.54E-08  | 4.02E-08  |
| Unigene91451  | Potri.004G214200.1 | 3.2781   | 0.8591  | 1.932  | Up | 7.25E-05  | 1.41E-04  |
| Unigene24256  | Potri.002G097700.3 | 13.5311  | 3.5486  | 1.931  | Up | 3.97E-16  | 1.52E-15  |
| Unigene38775  | Potri.003G034600.1 | 5.6814   | 1.4903  | 1.9306 | Up | 1.55E-12  | 5.05E-12  |
| Unigene56172  | Potri.001G297300.1 | 4.8089   | 1.262   | 1.93   | Up | 6.37E-09  | 1.70E-08  |
| Unigene22945  | Potri.005G083000.1 | 34.9683  | 9.1802  | 1.9295 | Up | 2.60E-43  | 2.20E-42  |
| Unigene54149  | Potri.014G135800.2 | 4.7493   | 1.248   | 1.9281 | Up | 2.94E-05  | 5.94E-05  |
| Unigene14832  | Potri.006G001200.1 | 3.8424   | 1.0097  | 1.9281 | Up | 2.65E-09  | 7.26E-09  |
| Unigene92758  | Potri.005G147300.1 | 3.0464   | 0.8005  | 1.9281 | Up | 2.94E-05  | 5.94E-05  |
| Unigene1101   | Potri.008G056100.1 | 48.3541  | 12.7199 | 1.9266 | Up | 2.05E-124 | 5.78E-123 |
| Unigene207    | Potri.006G233800.1 | 34.0314  | 8.9522  | 1.9266 | Up | 6.80E-247 | 4.61E-245 |
| Unigene46636  | Potri.017G032900.1 | 33.8285  | 8.9037  | 1.9258 | Up | 2.68E-60  | 3.20E-59  |
| Unigene64861  | Potri.010G192800.3 | 5.1965   | 1.3685  | 1.9249 | Up | 4.58E-10  | 1.31E-09  |
| Unigene30492  | Potri.002G127400.1 | 8.6371   | 2.2746  | 1.9249 | Up | 1.99E-14  | 7.09E-14  |
| Unigene44337  | Potri.001G099200.1 | 6.6321   | 1.7472  | 1.9244 | Up | 8.92E-28  | 5.08E-27  |
| Unigene93713  | Potri.002G085600.1 | 38.1919  | 10.0623 | 1.9243 | Up | 6.58E-63  | 8.23E-62  |
| Unigene14048  | Potri.006G145600.1 | 9.6979   | 2.5572  | 1.9231 | Up | 3.50E-15  | 1.29E-14  |
| Unigene19742  | Potri.019G043300.7 | 4.3935   | 1.1592  | 1.9222 | Up | 4.90E-06  | 1.06E-05  |

|               |                    |          |         |        |    |           |           |
|---------------|--------------------|----------|---------|--------|----|-----------|-----------|
| Unigene3715   | Potri.014G096800.1 | 5.8022   | 1.5309  | 1.9222 | Up | 4.90E-06  | 1.06E-05  |
| Unigene62212  | Potri.014G081100.5 | 4.7227   | 1.2461  | 1.9222 | Up | 4.90E-06  | 1.06E-05  |
| Unigene59490  | Potri.004G174700.1 | 4.0796   | 1.0764  | 1.9222 | Up | 4.90E-06  | 1.06E-05  |
| Unigene58556  | Potri.T016200.1    | 3.7944   | 1.0027  | 1.92   | Up | 2.01E-06  | 4.52E-06  |
| Unigene12777  | Potri.004G066300.1 | 5.436    | 1.4365  | 1.92   | Up | 1.09E-16  | 4.26E-16  |
| Unigene34349  | Potri.001G286100.1 | 33.6135  | 8.8891  | 1.9189 | Up | 2.16E-132 | 6.58E-131 |
| Unigene63744  | Potri.007G052200.3 | 3.122    | 0.8261  | 1.9181 | Up | 8.25E-07  | 1.91E-06  |
| Unigene40589  | Potri.006G025800.1 | 5.7307   | 1.5164  | 1.9181 | Up | 8.25E-07  | 1.91E-06  |
| Unigene38194  | Potri.015G071400.1 | 6.5288   | 1.7296  | 1.9164 | Up | 4.22E-13  | 1.41E-12  |
| Unigene108640 | Potri.012G017400.2 | 166.1525 | 44.0307 | 1.9159 | Up | 6.38E-90  | 1.19E-88  |
| Unigene26916  | Potri.004G041000.1 | 48.5421  | 12.8694 | 1.9153 | Up | 3.13E-80  | 5.15E-79  |
| Unigene69437  | Potri.016G104300.1 | 13.8686  | 3.6842  | 1.9124 | Up | 2.49E-22  | 1.20E-21  |
| Unigene69110  | Potri.011G077700.4 | 7.2034   | 1.9136  | 1.9124 | Up | 2.40E-08  | 6.20E-08  |
| Unigene60996  | Potri.010G150900.1 | 9.1679   | 2.4355  | 1.9124 | Up | 2.40E-08  | 6.20E-08  |
| Unigene38088  | Potri.010G249300.1 | 71.8565  | 19.1077 | 1.911  | Up | 8.31E-39  | 6.33E-38  |
| Unigene27655  | Potri.005G025700.1 | 31.2643  | 8.3142  | 1.9109 | Up | 1.64E-31  | 1.04E-30  |
| Unigene93431  | Potri.019G131400.8 | 25.7082  | 6.8371  | 1.9108 | Up | 3.51E-39  | 2.70E-38  |
| Unigene112008 | Potri.014G115500.2 | 174.587  | 46.4325 | 1.9107 | Up | 7.38E-107 | 1.71E-105 |
| Unigene25528  | Potri.012G007500.1 | 43.3674  | 11.5364 | 1.9104 | Up | 1.40E-24  | 7.23E-24  |
| Unigene31627  | Potri.001G402100.1 | 3.2557   | 0.8661  | 1.9104 | Up | 4.13E-09  | 1.12E-08  |
| Unigene70091  | Potri.008G153300.2 | 3.2546   | 0.8667  | 1.9089 | Up | 7.13E-10  | 2.02E-09  |
| Unigene65739  | Potri.005G196700.4 | 5.9069   | 1.5731  | 1.9088 | Up | 7.13E-10  | 2.02E-09  |
| Unigene5733   | Potri.005G126000.2 | 12.3483  | 3.2916  | 1.9075 | Up | 1.24E-10  | 3.66E-10  |
| Unigene19921  | Potri.016G098200.1 | 6.6325   | 1.7687  | 1.9069 | Up | 5.16E-11  | 1.56E-10  |
| Unigene64874  | Potri.001G110300.1 | 5.3425   | 1.4258  | 1.9057 | Up | 8.98E-12  | 2.82E-11  |
| Unigene2430   | Potri.018G077200.1 | 30.7243  | 8.2002  | 1.9056 | Up | 3.00E-74  | 4.50E-73  |
| Unigene43148  | Potri.011G095800.2 | 6.0313   | 1.6098  | 1.9056 | Up | 8.08E-33  | 5.30E-32  |
| Unigene35982  | Potri.002G103900.1 | 67.5754  | 18.0481 | 1.9047 | Up | 3.12E-147 | 1.09E-145 |
| Unigene51475  | Potri.013G136700.1 | 5.0459   | 1.3482  | 1.9041 | Up | 2.75E-13  | 9.28E-13  |
| Unigene26982  | Potri.010G016500.1 | 18.2127  | 4.8662  | 1.9041 | Up | 2.75E-13  | 9.28E-13  |
| Unigene11583  | Potri.T012300.1    | 20.7475  | 5.544   | 1.9039 | Up | 3.37E-61  | 4.09E-60  |
| Unigene37758  | Potri.001G338100.1 | 6.2733   | 1.6766  | 1.9037 | Up | 1.15E-13  | 3.95E-13  |
| Unigene43297  | Potri.001G174100.1 | 10.2242  | 2.7334  | 1.9032 | Up | 5.16E-27  | 2.87E-26  |
| Unigene16033  | Potri.001G282900.2 | 13.0155  | 3.4821  | 1.9022 | Up | 1.49E-15  | 5.56E-15  |
| Unigene21382  | Potri.014G095500.1 | 36.1499  | 9.6793  | 1.901  | Up | 8.40E-161 | 3.29E-159 |
| Unigene31748  | Potri.001G011800.1 | 49.2887  | 13.2037 | 1.9003 | Up | 2.28E-36  | 1.64E-35  |
| Unigene19989  | Potri.010G044400.1 | 19.4733  | 5.2189  | 1.8997 | Up | 1.90E-20  | 8.61E-20  |
| Unigene22980  | Potri.014G051400.1 | 5.0496   | 1.354   | 1.8989 | Up | 1.06E-22  | 5.17E-22  |
| Unigene109320 | Potri.008G080800.5 | 179.8745 | 48.2598 | 1.8981 | Up | 2.90E-98  | 6.07E-97  |

|               |                     |          |         |        |    |           |           |
|---------------|---------------------|----------|---------|--------|----|-----------|-----------|
| Unigene23728  | Potri.002G212400.3  | 27.4522  | 7.3654  | 1.8981 | Up | 3.08E-74  | 4.62E-73  |
| Unigene23764  | Potri.001G384000.1  | 33.9784  | 9.1174  | 1.8979 | Up | 3.04E-101 | 6.61E-100 |
| Unigene109620 | Potri.005G069500.1  | 143.4997 | 38.5108 | 1.8977 | Up | 1.87E-79  | 3.05E-78  |
| Unigene12989  | Potri.006G022100.1  | 69.1236  | 18.5845 | 1.8951 | Up | 2.30E-158 | 8.85E-157 |
| Unigene47393  | Potri.018G023000.1  | 11.8883  | 3.202   | 1.8925 | Up | 6.42E-09  | 1.72E-08  |
| Unigene87658  | Potri.016G014600.2  | 14.9666  | 4.0311  | 1.8925 | Up | 1.78E-13  | 6.08E-13  |
| Unigene16556  | Potri.015G105100.1  | 4.6443   | 1.2509  | 1.8925 | Up | 2.83E-04  | 5.16E-04  |
| Unigene69085  | Potri.015G094600.4  | 3.1328   | 0.8438  | 1.8925 | Up | 2.83E-04  | 5.16E-04  |
| Unigene47436  | Potri.014G159100.1  | 3.8921   | 1.0483  | 1.8925 | Up | 3.74E-08  | 9.55E-08  |
| Unigene11542  | Potri.014G091400.3  | 6.4782   | 1.7448  | 1.8925 | Up | 6.94E-26  | 3.73E-25  |
| Unigene84630  | Potri.014G076400.7  | 4.7957   | 1.2917  | 1.8925 | Up | 1.14E-04  | 2.17E-04  |
| Unigene48627  | Potri.013G116900.1  | 3.437    | 0.9257  | 1.8925 | Up | 1.11E-09  | 3.11E-09  |
| Unigene45139  | Potri.013G112900.3  | 8.2127   | 2.212   | 1.8925 | Up | 3.01E-17  | 1.21E-16  |
| Unigene76831  | Potri.012G006000.1  | 13.7419  | 3.7013  | 1.8925 | Up | 2.67E-09  | 7.32E-09  |
| Unigene2732   | Potri.011G137300.1  | 18.6923  | 5.0346  | 1.8925 | Up | 3.91E-22  | 1.86E-21  |
| Unigene38226  | Potri.011G112300.1  | 18.4033  | 4.9568  | 1.8925 | Up | 1.65E-22  | 7.95E-22  |
| Unigene46931  | Potri.010G173900.3  | 7.1615   | 1.9289  | 1.8925 | Up | 3.74E-08  | 9.55E-08  |
| Unigene97850  | Potri.010G148200.6  | 5.5949   | 1.5069  | 1.8925 | Up | 1.14E-04  | 2.17E-04  |
| Unigene84520  | Potri.010G129300.3  | 4.2781   | 1.1523  | 1.8925 | Up | 2.83E-04  | 5.16E-04  |
| Unigene70351  | Potri.009G066700.1  | 4.301    | 1.1584  | 1.8925 | Up | 2.24E-18  | 9.37E-18  |
| Unigene74415  | Potri.008G056500.4  | 6.2455   | 1.6822  | 1.8925 | Up | 1.14E-04  | 2.17E-04  |
| Unigene84743  | Potri.005G204400.1  | 7.9643   | 2.1451  | 1.8925 | Up | 5.31E-07  | 1.25E-06  |
| Unigene2914   | Potri.005G137400.6  | 6.8318   | 1.8401  | 1.8925 | Up | 6.08E-48  | 5.69E-47  |
| Unigene65811  | Potri.004G129400.1  | 4.1139   | 1.108   | 1.8925 | Up | 5.31E-07  | 1.25E-06  |
| Unigene91826  | Potri.004G021500.6  | 5.0748   | 1.3668  | 1.8925 | Up | 5.31E-07  | 1.25E-06  |
| Unigene59801  | Potri.003G205500.2  | 5.2814   | 1.4225  | 1.8925 | Up | 2.83E-04  | 5.16E-04  |
| Unigene64444  | Potri.003G108800.9  | 5.3074   | 1.4295  | 1.8925 | Up | 1.14E-04  | 2.17E-04  |
| Unigene2583   | Potri.003G096800.2  | 4.8917   | 1.3175  | 1.8925 | Up | 4.62E-05  | 9.17E-05  |
| Unigene87583  | Potri.002G254700.11 | 7.976    | 2.1483  | 1.8925 | Up | 9.04E-08  | 2.25E-07  |
| Unigene47616  | Potri.002G252800.1  | 5.6658   | 1.526   | 1.8925 | Up | 7.67E-06  | 1.64E-05  |
| Unigene64167  | Potri.002G238600.3  | 6.3094   | 1.6994  | 1.8925 | Up | 9.04E-08  | 2.25E-07  |
| Unigene5262   | Potri.002G231100.1  | 6.0897   | 1.6402  | 1.8925 | Up | 7.67E-06  | 1.63E-05  |
| Unigene44339  | Potri.002G197400.1  | 6.4869   | 1.7472  | 1.8925 | Up | 1.65E-22  | 7.95E-22  |
| Unigene41303  | Potri.002G132000.1  | 4.9023   | 1.3204  | 1.8925 | Up | 5.26E-30  | 3.19E-29  |
| Unigene30336  | Potri.001G469500.1  | 5.9679   | 1.6074  | 1.8925 | Up | 2.19E-07  | 5.29E-07  |
| Unigene45830  | Potri.001G390300.1  | 4.5557   | 1.227   | 1.8925 | Up | 1.92E-10  | 5.62E-10  |
| Unigene66225  | Potri.001G321600.1  | 7.3267   | 1.9734  | 1.8925 | Up | 1.88E-05  | 3.87E-05  |
| Unigene82851  | Potri.001G297200.3  | 12.4332  | 3.3488  | 1.8925 | Up | 1.11E-09  | 3.11E-09  |
| Unigene35528  | Potri.001G286800.1  | 8.7323   | 2.352   | 1.8925 | Up | 1.31E-14  | 4.70E-14  |

|               |                    |          |         |        |    |           |           |
|---------------|--------------------|----------|---------|--------|----|-----------|-----------|
| Unigene99062  | Potri.001G118900.1 | 13.5635  | 3.6532  | 1.8925 | Up | 2.44E-12  | 7.86E-12  |
| Unigene61419  | Potri.006G036800.1 | 3.4019   | 0.9163  | 1.8924 | Up | 1.29E-06  | 2.94E-06  |
| Unigene39225  | Potri.006G015900.2 | 9.2011   | 2.4813  | 1.8907 | Up | 4.31E-76  | 6.68E-75  |
| Unigene114378 | Potri.003G109300.1 | 115.3781 | 31.1885 | 1.8873 | Up | 1.07E-78  | 1.73E-77  |
| Unigene28155  | Potri.019G069100.1 | 6.4193   | 1.7366  | 1.8862 | Up | 1.07E-22  | 5.21E-22  |
| Unigene38925  | Potri.018G082000.1 | 17.965   | 4.8604  | 1.886  | Up | 2.55E-22  | 1.22E-21  |
| Unigene79303  | Potri.001G329300.2 | 24.6084  | 6.6697  | 1.8835 | Up | 2.64E-16  | 1.02E-15  |
| Unigene68563  | Potri.014G039500.1 | 8.413    | 2.2818  | 1.8824 | Up | 8.52E-15  | 3.08E-14  |
| Unigene40492  | Potri.017G099900.2 | 61.3403  | 16.6392 | 1.8822 | Up | 1.27E-79  | 2.08E-78  |
| Unigene43186  | Potri.016G084500.2 | 11.4053  | 3.0947  | 1.8818 | Up | 1.24E-26  | 6.84E-26  |
| Unigene830    | Potri.004G042000.1 | 9.2209   | 2.5022  | 1.8817 | Up | 2.95E-26  | 1.60E-25  |
| Unigene35875  | Potri.006G129500.1 | 18.2194  | 4.9459  | 1.8812 | Up | 2.76E-13  | 9.34E-13  |
| Unigene5631   | Potri.008G141200.1 | 5.1147   | 1.3888  | 1.8808 | Up | 6.60E-13  | 2.19E-12  |
| Unigene4636   | Potri.003G183700.1 | 102.1049 | 27.7255 | 1.8808 | Up | 2.79E-92  | 5.38E-91  |
| Unigene13299  | Potri.016G110300.1 | 5.7307   | 1.5569  | 1.88   | Up | 6.98E-23  | 3.42E-22  |
| Unigene43988  | Potri.010G109900.3 | 8.9298   | 2.4264  | 1.8798 | Up | 1.66E-22  | 8.00E-22  |
| Unigene104328 | Potri.001G088800.2 | 216.0737 | 58.7556 | 1.8787 | Up | 3.56E-213 | 1.99E-211 |
| Unigene118138 | Potri.017G138900.5 | 156.7491 | 42.6355 | 1.8783 | Up | 1.48E-160 | 5.79E-159 |
| Unigene11806  | Potri.017G081400.4 | 24.4078  | 6.6426  | 1.8775 | Up | 7.00E-46  | 6.27E-45  |
| Unigene16140  | Potri.014G174700.1 | 15.9615  | 4.3443  | 1.8774 | Up | 2.98E-10  | 8.63E-10  |
| Unigene8906   | Potri.010G046800.1 | 5.5627   | 1.514   | 1.8774 | Up | 2.98E-10  | 8.63E-10  |
| Unigene69353  | Potri.008G171000.1 | 5.4852   | 1.4929  | 1.8774 | Up | 2.98E-10  | 8.63E-10  |
| Unigene9736   | Potri.001G041900.3 | 17.7413  | 4.836   | 1.8752 | Up | 7.20E-17  | 2.84E-16  |
| Unigene11280  | Potri.018G034500.1 | 20.7476  | 5.6627  | 1.8734 | Up | 4.43E-43  | 3.73E-42  |
| Unigene12597  | Potri.008G135500.2 | 10.6774  | 2.9142  | 1.8734 | Up | 2.32E-15  | 8.58E-15  |
| Unigene48994  | Potri.008G092000.2 | 5.0863   | 1.3882  | 1.8734 | Up | 2.41E-08  | 6.21E-08  |
| Unigene108218 | Potri.006G044600.2 | 227.2375 | 62.0335 | 1.8731 | Up | 5.04E-117 | 1.31E-115 |
| Unigene34735  | Potri.005G137900.1 | 7.0817   | 1.9334  | 1.873  | Up | 2.02E-35  | 1.41E-34  |
| Unigene44169  | Potri.018G063100.1 | 5.6142   | 1.5328  | 1.8729 | Up | 5.52E-15  | 2.01E-14  |
| Unigene25337  | Potri.010G212900.2 | 5.8332   | 1.5932  | 1.8724 | Up | 5.81E-08  | 1.46E-07  |
| Unigene43372  | Potri.013G029500.1 | 64.1645  | 17.5428 | 1.8709 | Up | 3.50E-281 | 2.82E-279 |
| Unigene82716  | Potri.002G199600.1 | 8.9349   | 2.4447  | 1.8698 | Up | 3.40E-07  | 8.11E-07  |
| Unigene25748  | Potri.014G075400.1 | 3.2146   | 0.8796  | 1.8697 | Up | 3.40E-07  | 8.11E-07  |
| Unigene37118  | Potri.008G067400.6 | 6.9523   | 1.9023  | 1.8697 | Up | 3.40E-07  | 8.11E-07  |
| Unigene949    | Potri.003G170400.1 | 34.5053  | 9.4419  | 1.8697 | Up | 1.91E-76  | 2.98E-75  |
| Unigene12609  | Potri.009G163700.3 | 26.0527  | 7.1321  | 1.869  | Up | 3.10E-35  | 2.16E-34  |
| Unigene98653  | Potri.T012300.1    | 8.0317   | 2.1999  | 1.8683 | Up | 8.25E-07  | 1.91E-06  |
| Unigene54286  | Potri.001G069100.1 | 6.6486   | 1.8211  | 1.8682 | Up | 8.25E-07  | 1.91E-06  |
| Unigene34199  | Potri.001G204300.2 | 259.123  | 70.9841 | 1.8681 | Up | 0         | 0         |

|               |                     |          |          |        |    |           |           |
|---------------|---------------------|----------|----------|--------|----|-----------|-----------|
| Unigene6291   | Potri.016G064800.11 | 4.8157   | 1.3206   | 1.8666 | Up | 2.01E-06  | 4.51E-06  |
| Unigene70072  | Potri.017G122600.1  | 3.878    | 1.0635   | 1.8665 | Up | 2.01E-06  | 4.51E-06  |
| Unigene15051  | Potri.001G231100.1  | 5.3563   | 1.4689   | 1.8665 | Up | 2.01E-06  | 4.51E-06  |
| Unigene117570 | Potri.007G099400.1  | 337.4097 | 92.5346  | 1.8664 | Up | 2.00E-307 | 1.82E-305 |
| Unigene11991  | Potri.002G171000.1  | 17.0693  | 4.6826   | 1.866  | Up | 2.22E-21  | 1.04E-20  |
| Unigene62909  | Potri.010G063600.1  | 5.628    | 1.5456   | 1.8645 | Up | 4.89E-06  | 1.06E-05  |
| Unigene91544  | Potri.003G143600.1  | 22.3797  | 6.146    | 1.8645 | Up | 6.08E-25  | 3.17E-24  |
| Unigene88678  | Potri.001G087600.1  | 5.628    | 1.5456   | 1.8645 | Up | 4.89E-06  | 1.06E-05  |
| Unigene87913  | Potri.014G076400.7  | 5.8712   | 1.6124   | 1.8644 | Up | 4.89E-06  | 1.06E-05  |
| Unigene26567  | Potri.001G079800.1  | 193.7331 | 53.2219  | 1.864  | Up | 1.99E-143 | 6.68E-142 |
| Unigene32479  | Potri.004G030300.1  | 42.2941  | 11.6205  | 1.8638 | Up | 2.15E-74  | 3.23E-73  |
| Unigene16648  | Potri.T136000.1     | 14.9503  | 4.1089   | 1.8634 | Up | 1.68E-19  | 7.33E-19  |
| Unigene11907  | Potri.014G069200.2  | 37.7999  | 10.3893  | 1.8633 | Up | 1.47E-77  | 2.32E-76  |
| Unigene30351  | Potri.003G182200.1  | 163.5108 | 44.9514  | 1.8629 | Up | 1.50E-173 | 6.49E-172 |
| Unigene29267  | Potri.014G120400.1  | 7.0349   | 1.9343   | 1.8627 | Up | 3.99E-19  | 1.72E-18  |
| Unigene63054  | Potri.003G200200.2  | 4.3718   | 1.2025   | 1.8622 | Up | 1.20E-05  | 2.51E-05  |
| Unigene39649  | Potri.011G041100.1  | 4.5594   | 1.2542   | 1.8621 | Up | 4.62E-10  | 1.32E-09  |
| Unigene92493  | Potri.007G146300.3  | 7.2893   | 2.0051   | 1.8621 | Up | 4.62E-10  | 1.32E-09  |
| Unigene54972  | Potri.003G049100.1  | 4.7768   | 1.314    | 1.8621 | Up | 1.20E-05  | 2.51E-05  |
| Unigene24620  | Potri.001G342200.3  | 7.2441   | 1.9927   | 1.8621 | Up | 1.20E-05  | 2.51E-05  |
| Unigene32957  | Potri.014G167900.1  | 7.2157   | 1.9853   | 1.8618 | Up | 2.62E-31  | 1.65E-30  |
| Unigene118151 | Potri.002G104400.2  | 529.6355 | 145.7814 | 1.8612 | Up | 0         | 0         |
| Unigene12025  | Potri.001G328700.1  | 5.761    | 1.5857   | 1.8612 | Up | 4.85E-14  | 1.69E-13  |
| Unigene32652  | Potri.016G035700.1  | 39.7273  | 10.938   | 1.8608 | Up | 1.05E-83  | 1.82E-82  |
| Unigene22522  | Potri.003G166100.2  | 10.8992  | 3.0008   | 1.8608 | Up | 2.97E-26  | 1.61E-25  |
| Unigene114101 | Potri.001G082800.1  | 12.7158  | 3.501    | 1.8608 | Up | 1.11E-09  | 3.11E-09  |
| Unigene67113  | Potri.001G271200.1  | 3.7827   | 1.0425   | 1.8594 | Up | 2.67E-09  | 7.31E-09  |
| Unigene91196  | Potri.001G190300.3  | 3.9119   | 1.0781   | 1.8594 | Up | 2.93E-05  | 5.92E-05  |
| Unigene68937  | Potri.016G032500.1  | 4.6489   | 1.2813   | 1.8593 | Up | 2.93E-05  | 5.92E-05  |
| Unigene89778  | Potri.008G018300.5  | 12.8089  | 3.5328   | 1.8583 | Up | 6.60E-13  | 2.19E-12  |
| Unigene108805 | Potri.001G087500.3  | 81.1709  | 22.3889  | 1.8582 | Up | 2.90E-43  | 2.45E-42  |
| Unigene116367 | Potri.014G073000.1  | 58.5461  | 16.1504  | 1.858  | Up | 8.27E-47  | 7.55E-46  |
| Unigene64710  | Potri.002G110800.1  | 5.9854   | 1.6514   | 1.8578 | Up | 6.41E-09  | 1.71E-08  |
| Unigene28600  | Potri.006G065700.1  | 35.6959  | 9.8543   | 1.8569 | Up | 2.55E-56  | 2.83E-55  |
| Unigene110895 | Potri.008G069400.1  | 275.7209 | 76.1218  | 1.8568 | Up | 5.05E-154 | 1.87E-152 |
| Unigene89916  | Potri.007G100500.1  | 7.9059   | 2.184    | 1.856  | Up | 1.55E-08  | 4.04E-08  |
| Unigene50886  | Potri.013G084000.1  | 3.4884   | 0.9637   | 1.8559 | Up | 7.21E-05  | 1.40E-04  |
| Unigene91748  | Potri.005G180100.1  | 3.3288   | 0.9196   | 1.8559 | Up | 7.21E-05  | 1.40E-04  |
| Unigene19966  | Potri.005G083000.1  | 9.9978   | 2.7619   | 1.8559 | Up | 1.55E-08  | 4.04E-08  |

|               |                    |          |         |        |    |           |           |
|---------------|--------------------|----------|---------|--------|----|-----------|-----------|
| Unigene101531 | Potri.007G122700.1 | 14.0005  | 3.8705  | 1.8549 | Up | 1.08E-25  | 5.78E-25  |
| Unigene108161 | Potri.008G114000.1 | 194.1396 | 53.711  | 1.8538 | Up | 2.09E-98  | 4.39E-97  |
| Unigene2486   | Potri.001G041800.6 | 48.315   | 13.3798 | 1.8524 | Up | 1.51E-104 | 3.41E-103 |
| Unigene31123  | Potri.010G000700.2 | 40.7603  | 11.2891 | 1.8522 | Up | 4.33E-40  | 3.40E-39  |
| Unigene62988  | Potri.014G015700.3 | 5.5317   | 1.5325  | 1.8518 | Up | 1.78E-04  | 3.33E-04  |
| Unigene82692  | Potri.014G014200.2 | 4.9638   | 1.3752  | 1.8518 | Up | 1.78E-04  | 3.33E-04  |
| Unigene47844  | Potri.019G023700.1 | 85.3882  | 23.6628 | 1.8514 | Up | 6.09E-102 | 1.33E-100 |
| Unigene27238  | Potri.002G014700.1 | 60.0708  | 16.6513 | 1.851  | Up | 1.87E-54  | 1.99E-53  |
| Unigene9998   | Potri.001G469600.1 | 189.0386 | 52.4488 | 1.8497 | Up | 1.22E-169 | 5.13E-168 |
| Unigene40909  | Potri.T169400.1    | 5.5465   | 1.5396  | 1.849  | Up | 2.56E-22  | 1.23E-21  |
| Unigene117347 | Potri.010G243100.3 | 37.2995  | 10.3559 | 1.8487 | Up | 6.32E-34  | 4.26E-33  |
| Unigene115346 | Potri.003G141900.3 | 350.3818 | 97.3126 | 1.8482 | Up | 9.81E-245 | 6.59E-243 |
| Unigene117555 | Potri.002G200400.2 | 59.9421  | 16.6622 | 1.847  | Up | 3.35E-55  | 3.63E-54  |
| Unigene107919 | Potri.018G066100.2 | 5.6681   | 1.5759  | 1.8467 | Up | 4.43E-04  | 7.89E-04  |
| Unigene75347  | Potri.018G017000.1 | 5.2558   | 1.4613  | 1.8467 | Up | 4.43E-04  | 7.89E-04  |
| Unigene83600  | Potri.017G146800.2 | 4.2667   | 1.1863  | 1.8467 | Up | 4.43E-04  | 7.89E-04  |
| Unigene84922  | Potri.006G034700.1 | 4.0858   | 1.136   | 1.8467 | Up | 4.43E-04  | 7.89E-04  |
| Unigene84221  | Potri.004G187700.1 | 4.1894   | 1.1648  | 1.8467 | Up | 4.43E-04  | 7.89E-04  |
| Unigene83165  | Potri.011G137300.3 | 4.3307   | 1.2041  | 1.8466 | Up | 4.43E-04  | 7.89E-04  |
| Unigene69649  | Potri.002G097000.1 | 5.7829   | 1.6095  | 1.8452 | Up | 2.43E-12  | 7.85E-12  |
| Unigene55564  | Potri.017G041300.1 | 3.9305   | 1.0947  | 1.8442 | Up | 8.50E-15  | 3.07E-14  |
| Unigene46315  | Potri.003G145300.1 | 62.0023  | 17.2726 | 1.8438 | Up | 8.54E-36  | 6.05E-35  |
| Unigene35557  | Potri.008G183600.4 | 5.0078   | 1.3953  | 1.8436 | Up | 1.28E-06  | 2.92E-06  |
| Unigene23015  | Potri.008G166700.1 | 8.2258   | 2.2919  | 1.8436 | Up | 3.02E-17  | 1.21E-16  |
| Unigene18569  | Potri.005G125100.1 | 5.1646   | 1.4425  | 1.8401 | Up | 9.91E-09  | 2.63E-08  |
| Unigene13869  | Potri.017G146700.3 | 5.7329   | 1.6013  | 1.84   | Up | 9.91E-09  | 2.63E-08  |
| Unigene46560  | Potri.010G079100.1 | 3.5776   | 0.9993  | 1.84   | Up | 3.11E-06  | 6.89E-06  |
| Unigene34479  | Potri.005G068400.4 | 6.742    | 1.8832  | 1.84   | Up | 5.25E-21  | 2.42E-20  |
| Unigene93775  | Potri.001G423600.1 | 3.1373   | 0.8763  | 1.84   | Up | 3.11E-06  | 6.89E-06  |
| Unigene24009  | Potri.008G099900.1 | 66.8314  | 18.6715 | 1.8397 | Up | 3.49E-165 | 1.43E-163 |
| Unigene47046  | Potri.006G026900.4 | 12.3107  | 3.4444  | 1.8376 | Up | 1.10E-31  | 7.01E-31  |
| Unigene40034  | Potri.003G109300.1 | 72.2262  | 20.2124 | 1.8373 | Up | 6.41E-89  | 1.18E-87  |
| Unigene68694  | Potri.016G074800.1 | 4.3862   | 1.2279  | 1.8368 | Up | 2.20E-24  | 1.13E-23  |
| Unigene57668  | Potri.013G053100.3 | 3.3423   | 0.9362  | 1.836  | Up | 7.59E-06  | 1.63E-05  |
| Unigene54204  | Potri.006G076300.1 | 4.2873   | 1.2009  | 1.836  | Up | 7.59E-06  | 1.63E-05  |
| Unigene8708   | Potri.014G173600.1 | 3.5188   | 0.9857  | 1.8359 | Up | 7.59E-06  | 1.63E-05  |
| Unigene64674  | Potri.001G148800.1 | 4.6049   | 1.2899  | 1.8359 | Up | 7.59E-06  | 1.63E-05  |
| Unigene66606  | Potri.017G087700.2 | 3.7829   | 1.0597  | 1.8358 | Up | 7.59E-06  | 1.63E-05  |
| Unigene22111  | Potri.017G138900.2 | 85.7686  | 24.0357 | 1.8353 | Up | 2.90E-264 | 2.16E-262 |

|               |                    |          |         |        |    |           |           |
|---------------|--------------------|----------|---------|--------|----|-----------|-----------|
| Unigene11764  | Potri.012G070700.1 | 30.4202  | 8.5254  | 1.8352 | Up | 4.10E-70  | 5.77E-69  |
| Unigene26751  | Potri.014G096200.1 | 38.392   | 10.7609 | 1.835  | Up | 1.24E-23  | 6.20E-23  |
| Unigene72146  | Potri.011G140800.1 | 17.3823  | 4.8768  | 1.8336 | Up | 4.58E-10  | 1.31E-09  |
| Unigene35449  | Potri.002G037400.1 | 55.0211  | 15.4558 | 1.8318 | Up | 9.45E-31  | 5.86E-30  |
| Unigene49448  | Potri.017G135500.1 | 7.2178   | 2.0286  | 1.8311 | Up | 6.25E-16  | 2.37E-15  |
| Unigene61194  | Potri.017G096900.1 | 7.0319   | 1.9763  | 1.8311 | Up | 6.25E-16  | 2.37E-15  |
| Unigene117957 | Potri.010G142300.3 | 4.3437   | 1.2208  | 1.8311 | Up | 1.86E-05  | 3.82E-05  |
| Unigene113119 | Potri.008G037700.1 | 64.006   | 18.003  | 1.83   | Up | 6.56E-40  | 5.13E-39  |
| Unigene36693  | Potri.002G196200.2 | 72.5406  | 20.4031 | 1.83   | Up | 3.56E-80  | 5.86E-79  |
| Unigene34982  | Potri.008G078300.1 | 18.3116  | 5.1533  | 1.8292 | Up | 2.00E-35  | 1.40E-34  |
| Unigene42126  | Potri.002G036200.2 | 4.7809   | 1.3457  | 1.8289 | Up | 2.14E-11  | 6.59E-11  |
| Unigene15590  | Potri.018G109800.1 | 33.984   | 9.5679  | 1.8286 | Up | 3.39E-27  | 1.90E-26  |
| Unigene52576  | Potri.018G107300.1 | 4.7365   | 1.3337  | 1.8284 | Up | 2.64E-09  | 7.24E-09  |
| Unigene45350  | Potri.006G125500.1 | 6.3906   | 1.8     | 1.828  | Up | 3.54E-15  | 1.30E-14  |
| Unigene93878  | Potri.014G060900.3 | 3.6403   | 1.0257  | 1.8274 | Up | 3.37E-07  | 8.03E-07  |
| Unigene15413  | Potri.011G162500.1 | 10.361   | 2.9194  | 1.8274 | Up | 3.37E-07  | 8.03E-07  |
| Unigene36848  | Potri.003G138000.2 | 7.3247   | 2.0639  | 1.8274 | Up | 3.37E-07  | 8.03E-07  |
| Unigene116172 | Potri.002G256900.5 | 225.6021 | 63.6482 | 1.8256 | Up | 5.39E-168 | 2.24E-166 |
| Unigene54083  | Potri.T147600.2    | 9.0033   | 2.5404  | 1.8254 | Up | 6.35E-09  | 1.70E-08  |
| Unigene88789  | Potri.018G005900.2 | 4.5941   | 1.2963  | 1.8254 | Up | 4.55E-05  | 9.05E-05  |
| Unigene81913  | Potri.013G067500.1 | 61.9724  | 17.5126 | 1.8232 | Up | 1.54E-39  | 1.19E-38  |
| Unigene27437  | Potri.010G238800.1 | 40.5063  | 11.4555 | 1.8221 | Up | 6.89E-23  | 3.37E-22  |
| Unigene49636  | Potri.004G223400.2 | 5.8855   | 1.6645  | 1.8221 | Up | 1.53E-08  | 4.00E-08  |
| Unigene90874  | Potri.003G096100.1 | 7.5163   | 2.1257  | 1.8221 | Up | 1.53E-08  | 4.00E-08  |
| Unigene37838  | Potri.001G224400.2 | 9.2098   | 2.6046  | 1.8221 | Up | 1.53E-08  | 4.00E-08  |
| Unigene27160  | Potri.003G096100.1 | 7.3706   | 2.0855  | 1.8214 | Up | 2.94E-10  | 8.51E-10  |
| Unigene29883  | Potri.005G220800.1 | 3.1349   | 0.8873  | 1.8209 | Up | 5.76E-12  | 1.82E-11  |
| Unigene42327  | Potri.002G259300.1 | 8.0928   | 2.2915  | 1.8203 | Up | 2.28E-15  | 8.45E-15  |
| Unigene34808  | Potri.009G029400.1 | 51.3408  | 14.5411 | 1.82   | Up | 4.04E-243 | 2.69E-241 |
| Unigene35353  | Potri.001G239300.1 | 24.6733  | 6.9887  | 1.8199 | Up | 1.89E-20  | 8.56E-20  |
| Unigene4152   | Potri.018G124700.1 | 7.1585   | 2.0296  | 1.8185 | Up | 1.98E-06  | 4.45E-06  |
| Unigene48609  | Potri.018G082900.6 | 5.4375   | 1.5416  | 1.8185 | Up | 1.98E-06  | 4.45E-06  |
| Unigene37968  | Potri.014G114000.3 | 4.8047   | 1.3622  | 1.8185 | Up | 1.12E-04  | 2.14E-04  |
| Unigene1469   | Potri.013G148900.1 | 4.9444   | 1.4018  | 1.8185 | Up | 1.98E-06  | 4.45E-06  |
| Unigene57291  | Potri.008G144800.1 | 3.5853   | 1.0165  | 1.8185 | Up | 1.98E-06  | 4.45E-06  |
| Unigene92703  | Potri.005G188000.2 | 4.2778   | 1.2128  | 1.8185 | Up | 1.98E-06  | 4.45E-06  |
| Unigene70343  | Potri.002G245400.2 | 4.6199   | 1.3098  | 1.8185 | Up | 7.05E-10  | 2.00E-09  |
| Unigene67044  | Potri.001G293600.2 | 3.6593   | 1.0375  | 1.8185 | Up | 1.98E-06  | 4.45E-06  |
| Unigene26713  | Potri.001G056600.1 | 9.3249   | 2.6438  | 1.8185 | Up | 3.68E-08  | 9.41E-08  |

|               |                    |         |         |        |    |           |           |
|---------------|--------------------|---------|---------|--------|----|-----------|-----------|
| Unigene45373  | Potri.008G031800.1 | 6.0448  | 1.7165  | 1.8162 | Up | 6.49E-13  | 2.15E-12  |
| Unigene70127  | Potri.009G140100.1 | 8.3236  | 2.3638  | 1.8161 | Up | 1.06E-22  | 5.13E-22  |
| Unigene29589  | Potri.005G072500.1 | 6.1599  | 1.7507  | 1.815  | Up | 6.18E-16  | 2.34E-15  |
| Unigene13254  | Potri.001G087900.1 | 9.1784  | 2.6089  | 1.8148 | Up | 2.50E-22  | 1.20E-21  |
| Unigene93505  | Potri.018G012100.1 | 4.5595  | 1.2963  | 1.8145 | Up | 8.88E-08  | 2.21E-07  |
| Unigene18751  | Potri.005G107700.1 | 83.8668 | 23.8523 | 1.814  | Up | 1.23E-130 | 3.68E-129 |
| Unigene19805  | Potri.018G132500.5 | 14.0013 | 3.9823  | 1.8139 | Up | 1.55E-12  | 5.05E-12  |
| Unigene48066  | Potri.007G011500.5 | 6.1027  | 1.7357  | 1.8139 | Up | 1.55E-12  | 5.05E-12  |
| Unigene50174  | Potri.016G004400.1 | 3.7944  | 1.0798  | 1.8131 | Up | 4.82E-06  | 1.05E-05  |
| Unigene82298  | Potri.001G193500.1 | 15.2067 | 4.3276  | 1.8131 | Up | 7.87E-11  | 2.36E-10  |
| Unigene75529  | Potri.004G073500.1 | 8.9451  | 2.5457  | 1.813  | Up | 4.82E-06  | 1.05E-05  |
| Unigene46943  | Potri.006G254600.1 | 34.4667 | 9.8101  | 1.8129 | Up | 1.21E-46  | 1.10E-45  |
| Unigene28116  | Potri.005G200300.1 | 8.9371  | 2.5464  | 1.8113 | Up | 3.70E-12  | 1.18E-11  |
| Unigene99621  | Potri.010G111500.1 | 52.5626 | 14.9843 | 1.8106 | Up | 8.41E-53  | 8.69E-52  |
| Unigene58630  | Potri.005G102200.5 | 5.6239  | 1.6038  | 1.8101 | Up | 2.15E-07  | 5.19E-07  |
| Unigene93810  | Potri.005G190900.1 | 19.5708 | 5.5813  | 1.81   | Up | 1.64E-31  | 1.04E-30  |
| Unigene29455  | Potri.001G148800.1 | 5.0525  | 1.4409  | 1.81   | Up | 2.77E-04  | 5.07E-04  |
| Unigene56507  | Potri.010G153200.1 | 8.6363  | 2.4644  | 1.8092 | Up | 8.04E-18  | 3.30E-17  |
| Unigene92433  | Potri.002G099400.2 | 6.4903  | 1.8534  | 1.8081 | Up | 9.77E-09  | 2.59E-08  |
| Unigene20244  | Potri.001G141700.1 | 4.6001  | 1.3136  | 1.8081 | Up | 9.77E-09  | 2.59E-08  |
| Unigene36899  | Potri.006G186900.2 | 3.429   | 0.9801  | 1.8068 | Up | 1.17E-05  | 2.47E-05  |
| Unigene8571   | Potri.005G255100.1 | 6.5158  | 1.8624  | 1.8068 | Up | 4.52E-10  | 1.29E-09  |
| Unigene7060   | Potri.005G189500.1 | 4.6545  | 1.3304  | 1.8068 | Up | 1.98E-14  | 7.05E-14  |
| Unigene93441  | Potri.004G228800.2 | 6.3351  | 1.8108  | 1.8067 | Up | 4.52E-10  | 1.29E-09  |
| Unigene114758 | Potri.001G294600.1 | 13.244  | 3.7856  | 1.8067 | Up | 4.52E-10  | 1.29E-09  |
| Unigene109117 | Potri.012G007500.1 | 91.4895 | 26.1583 | 1.8063 | Up | 3.29E-47  | 3.04E-46  |
| Unigene48366  | Potri.001G249200.8 | 55.673  | 15.9252 | 1.8057 | Up | 6.15E-37  | 4.49E-36  |
| Unigene83394  | Potri.010G090400.2 | 19.8284 | 5.6767  | 1.8044 | Up | 4.72E-14  | 1.65E-13  |
| Unigene29341  | Potri.014G134600.1 | 6.3781  | 1.8266  | 1.804  | Up | 2.35E-08  | 6.07E-08  |
| Unigene26421  | Potri.001G449800.1 | 21.5102 | 6.1634  | 1.8032 | Up | 5.18E-18  | 2.14E-17  |
| Unigene44274  | Potri.003G148200.1 | 32.0401 | 9.1833  | 1.8028 | Up | 5.84E-48  | 5.48E-47  |
| Unigene94146  | Potri.007G031500.2 | 6.0618  | 1.738   | 1.8023 | Up | 2.37E-12  | 7.66E-12  |
| Unigene16956  | Potri.013G049200.1 | 4.0839  | 1.1733  | 1.7994 | Up | 5.66E-08  | 1.43E-07  |
| Unigene88273  | Potri.010G199200.3 | 5.0863  | 1.4613  | 1.7994 | Up | 2.87E-05  | 5.80E-05  |
| Unigene5615   | Potri.008G201400.5 | 13.5143 | 3.8826  | 1.7994 | Up | 5.66E-08  | 1.43E-07  |
| Unigene26434  | Potri.008G031300.2 | 3.4679  | 0.9963  | 1.7994 | Up | 2.87E-05  | 5.80E-05  |
| Unigene23928  | Potri.006G065700.1 | 13.0115 | 3.7382  | 1.7994 | Up | 6.78E-20  | 3.01E-19  |
| Unigene16575  | Potri.006G023900.2 | 3.5712  | 1.026   | 1.7994 | Up | 2.87E-05  | 5.80E-05  |
| Unigene35088  | Potri.003G069900.6 | 5.7384  | 1.6486  | 1.7994 | Up | 2.60E-09  | 7.13E-09  |



|               |                    |          |          |        |    |           |           |
|---------------|--------------------|----------|----------|--------|----|-----------|-----------|
| Unigene15032  | Potri.006G245500.1 | 91.1045  | 26.1834  | 1.7989 | Up | 1.06E-62  | 1.32E-61  |
| Unigene17070  | Potri.010G226000.5 | 30.9031  | 8.8839   | 1.7985 | Up | 1.43E-36  | 1.03E-35  |
| Unigene89864  | Potri.009G014300.1 | 35.775   | 10.2927  | 1.7973 | Up | 2.86E-32  | 1.85E-31  |
| Unigene37990  | Potri.010G197700.1 | 3.0854   | 0.8886   | 1.7959 | Up | 2.89E-10  | 8.37E-10  |
| Unigene42589  | Potri.006G254600.1 | 7.3012   | 2.1033   | 1.7955 | Up | 1.28E-41  | 1.04E-40  |
| Unigene63698  | Potri.010G162900.1 | 6.7466   | 1.9444   | 1.7948 | Up | 3.44E-15  | 1.26E-14  |
| Unigene48084  | Potri.001G079800.1 | 95.0924  | 27.4368  | 1.7932 | Up | 9.53E-98  | 1.98E-96  |
| Unigene50695  | Potri.013G044700.1 | 5.9348   | 1.7146   | 1.7913 | Up | 4.46E-17  | 1.78E-16  |
| Unigene57497  | Potri.T052400.1    | 3.9112   | 1.1305   | 1.7907 | Up | 7.05E-05  | 1.38E-04  |
| Unigene58338  | Potri.001G183000.1 | 3.5075   | 1.0138   | 1.7907 | Up | 7.05E-05  | 1.38E-04  |
| Unigene30241  | Potri.017G077300.2 | 5.7063   | 1.6494   | 1.7906 | Up | 7.05E-05  | 1.38E-04  |
| Unigene30262  | Potri.006G254900.5 | 3.0403   | 0.8788   | 1.7906 | Up | 7.05E-05  | 1.38E-04  |
| Unigene62754  | Potri.001G084700.3 | 4.0781   | 1.1788   | 1.7906 | Up | 7.05E-05  | 1.38E-04  |
| Unigene14998  | Potri.011G041700.1 | 44.4303  | 12.8534  | 1.7894 | Up | 1.17E-29  | 7.06E-29  |
| Unigene115370 | Potri.001G117400.1 | 120.0579 | 34.7435  | 1.7889 | Up | 9.74E-82  | 1.64E-80  |
| Unigene64569  | Potri.015G030400.1 | 7.2647   | 2.1027   | 1.7887 | Up | 3.30E-07  | 7.87E-07  |
| Unigene5436   | Potri.009G145900.1 | 10.0769  | 2.9167   | 1.7886 | Up | 3.30E-07  | 7.87E-07  |
| Unigene15308  | Potri.014G035900.1 | 5.5575   | 1.612    | 1.7856 | Up | 7.42E-06  | 1.59E-05  |
| Unigene85311  | Potri.003G079500.1 | 16.8953  | 4.9006   | 1.7856 | Up | 9.76E-13  | 3.21E-12  |
| Unigene25545  | Potri.002G127400.1 | 6.6576   | 1.9311   | 1.7856 | Up | 3.61E-08  | 9.22E-08  |
| Unigene27436  | Potri.008G179700.2 | 77.9414  | 22.6132  | 1.7852 | Up | 6.61E-52  | 6.71E-51  |
| Unigene47365  | Potri.002G149700.1 | 94.4777  | 27.4132  | 1.7851 | Up | 3.64E-114 | 9.20E-113 |
| Unigene37327  | Potri.010G191600.1 | 4.5057   | 1.3086   | 1.7837 | Up | 2.07E-11  | 6.38E-11  |
| Unigene93786  | Potri.004G123300.1 | 5.1548   | 1.4976   | 1.7833 | Up | 3.98E-09  | 1.08E-08  |
| Unigene93789  | Potri.019G073000.1 | 3.6432   | 1.0591   | 1.7824 | Up | 7.97E-07  | 1.85E-06  |
| Unigene24977  | Potri.010G080700.1 | 7.4599   | 2.1687   | 1.7823 | Up | 7.97E-07  | 1.85E-06  |
| Unigene4652   | Potri.002G056800.2 | 5.2394   | 1.5232   | 1.7823 | Up | 2.33E-12  | 7.51E-12  |
| Unigene7594   | Potri.014G038700.1 | 18.0833  | 5.2579   | 1.7821 | Up | 2.44E-37  | 1.80E-36  |
| Unigene62596  | Potri.007G052200.2 | 7.873    | 2.2898   | 1.7817 | Up | 3.15E-24  | 1.61E-23  |
| Unigene113163 | Potri.019G132800.2 | 5.4983   | 1.601    | 1.78   | Up | 1.74E-04  | 3.24E-04  |
| Unigene79637  | Potri.008G072700.3 | 5.6794   | 1.6537   | 1.78   | Up | 1.74E-04  | 3.24E-04  |
| Unigene67542  | Potri.006G022000.1 | 5.633    | 1.6402   | 1.78   | Up | 1.74E-04  | 3.24E-04  |
| Unigene29385  | Potri.001G160100.7 | 3.73     | 1.0861   | 1.78   | Up | 8.68E-08  | 2.16E-07  |
| Unigene10731  | Potri.003G109100.1 | 59.8432  | 17.426   | 1.7799 | Up | 0         | 0         |
| Unigene44599  | Potri.010G042600.1 | 12.2869  | 3.5795   | 1.7793 | Up | 2.10E-18  | 8.82E-18  |
| Unigene107670 | Potri.001G043100.3 | 280.4852 | 81.763   | 1.7784 | Up | 1.06E-131 | 3.20E-130 |
| Unigene48607  | Potri.004G042700.1 | 4.2326   | 1.235    | 1.777  | Up | 1.81E-05  | 3.73E-05  |
| Unigene117749 | Potri.001G088800.1 | 538.1512 | 157.0493 | 1.7768 | Up | 0         | 0         |
| Unigene19719  | Potri.008G145600.1 | 14.1027  | 4.1179   | 1.776  | Up | 1.18E-10  | 3.50E-10  |

|               |                    |          |         |        |    |           |           |
|---------------|--------------------|----------|---------|--------|----|-----------|-----------|
| Unigene6446   | Potri.011G130000.5 | 11.0963  | 3.2407  | 1.7757 | Up | 9.10E-16  | 3.43E-15  |
| Unigene44112  | Potri.006G263200.1 | 11.2782  | 3.2939  | 1.7757 | Up | 9.10E-16  | 3.43E-15  |
| Unigene4277   | Potri.009G066800.2 | 3.3753   | 0.9861  | 1.7752 | Up | 1.93E-06  | 4.35E-06  |
| Unigene88348  | Potri.018G033300.1 | 27.3831  | 8.0128  | 1.7729 | Up | 2.33E-22  | 1.12E-21  |
| Unigene48314  | Potri.006G063000.1 | 14.7379  | 4.3126  | 1.7729 | Up | 2.30E-08  | 5.94E-08  |
| Unigene41921  | Potri.006G250900.1 | 101.7772 | 29.7855 | 1.7727 | Up | 2.80E-94  | 5.56E-93  |
| Unigene44445  | Potri.010G092900.6 | 4.7082   | 1.3789  | 1.7717 | Up | 2.82E-10  | 8.19E-10  |
| Unigene15931  | Potri.013G102300.3 | 17.6274  | 5.1656  | 1.7708 | Up | 6.34E-23  | 3.10E-22  |
| Unigene92685  | Potri.007G031400.1 | 9.4001   | 2.7546  | 1.7708 | Up | 3.55E-12  | 1.14E-11  |
| Unigene115994 | Potri.015G069000.2 | 149.689  | 43.8865 | 1.7701 | Up | 1.79E-105 | 4.07E-104 |
| Unigene31645  | Potri.005G020500.2 | 96.5327  | 28.3032 | 1.7701 | Up | 5.41E-68  | 7.37E-67  |
| Unigene33254  | Potri.017G050600.1 | 5.0978   | 1.4954  | 1.7693 | Up | 8.67E-19  | 3.69E-18  |
| Unigene20681  | Potri.018G125800.3 | 4.7709   | 1.4018  | 1.767  | Up | 4.69E-06  | 1.02E-05  |
| Unigene8951   | Potri.016G069100.1 | 3.7527   | 1.1026  | 1.767  | Up | 4.29E-04  | 7.66E-04  |
| Unigene71694  | Potri.010G057400.4 | 6.0338   | 1.7729  | 1.767  | Up | 4.29E-04  | 7.66E-04  |
| Unigene93080  | Potri.009G053500.1 | 3.8562   | 1.133   | 1.767  | Up | 4.69E-06  | 1.02E-05  |
| Unigene61761  | Potri.003G090900.1 | 5.5949   | 1.6439  | 1.767  | Up | 4.29E-04  | 7.66E-04  |
| Unigene83589  | Potri.002G090000.6 | 7.57     | 2.2243  | 1.7669 | Up | 4.69E-06  | 1.02E-05  |
| Unigene66526  | Potri.001G415700.1 | 4.716    | 1.3857  | 1.7669 | Up | 4.29E-04  | 7.66E-04  |
| Unigene98817  | Potri.002G256000.1 | 24.5548  | 7.2315  | 1.7636 | Up | 4.00E-26  | 2.17E-25  |
| Unigene43152  | Potri.015G054300.1 | 124.2171 | 36.6407 | 1.7613 | Up | 1.32E-275 | 1.04E-273 |
| Unigene1526   | Potri.010G109900.3 | 5.5949   | 1.6505  | 1.7612 | Up | 1.46E-08  | 3.82E-08  |
| Unigene94497  | Potri.001G152400.1 | 5.7384   | 1.6934  | 1.7607 | Up | 4.69E-21  | 2.16E-20  |
| Unigene45215  | Potri.006G178500.1 | 21.812   | 6.4382  | 1.7604 | Up | 1.10E-38  | 8.37E-38  |
| Unigene69245  | Potri.013G008900.1 | 5.5061   | 1.6265  | 1.7593 | Up | 5.41E-12  | 1.72E-11  |
| Unigene91913  | Potri.010G056600.1 | 10.3936  | 3.0703  | 1.7592 | Up | 5.41E-12  | 1.72E-11  |
| Unigene22691  | Potri.005G222300.1 | 13.5464  | 4.0023  | 1.759  | Up | 3.93E-32  | 2.53E-31  |
| Unigene1826   | Potri.002G042200.1 | 27.6253  | 8.1644  | 1.7586 | Up | 4.75E-45  | 4.17E-44  |
| Unigene59493  | Potri.008G053900.3 | 4.0048   | 1.1844  | 1.7576 | Up | 1.14E-05  | 2.40E-05  |
| Unigene89186  | Potri.005G186800.1 | 5.4351   | 1.6074  | 1.7576 | Up | 1.14E-05  | 2.40E-05  |
| Unigene635    | Potri.006G213600.1 | 5.4832   | 1.6226  | 1.7567 | Up | 3.01E-21  | 1.40E-20  |
| Unigene62765  | Potri.008G134600.1 | 4.374    | 1.2946  | 1.7564 | Up | 3.87E-09  | 1.05E-08  |
| Unigene9902   | Potri.013G102700.1 | 3.9366   | 1.1663  | 1.755  | Up | 1.09E-04  | 2.07E-04  |
| Unigene82057  | Potri.010G006300.1 | 5.7605   | 1.7067  | 1.755  | Up | 1.09E-04  | 2.07E-04  |
| Unigene67233  | Potri.015G073000.1 | 3.0636   | 0.9077  | 1.7549 | Up | 1.09E-04  | 2.07E-04  |
| Unigene91443  | Potri.001G001400.2 | 3.5439   | 1.05    | 1.7549 | Up | 1.09E-04  | 2.07E-04  |
| Unigene14940  | Potri.009G170600.3 | 7.9059   | 2.3478  | 1.7516 | Up | 1.19E-14  | 4.26E-14  |
| Unigene117611 | Potri.001G180100.1 | 288.2694 | 85.6636 | 1.7507 | Up | 3.19E-242 | 2.11E-240 |
| Unigene39393  | Potri.014G149200.1 | 21.335   | 6.3409  | 1.7505 | Up | 5.91E-26  | 3.18E-25  |

|              |                    |         |         |        |    |           |           |
|--------------|--------------------|---------|---------|--------|----|-----------|-----------|
| Unigene33955 | Potri.010G042600.2 | 3.3029  | 0.9816  | 1.7505 | Up | 2.96E-06  | 6.55E-06  |
| Unigene71122 | Potri.003G216100.1 | 10.7098 | 3.183   | 1.7505 | Up | 2.96E-06  | 6.55E-06  |
| Unigene33681 | Potri.005G145500.1 | 5.6781  | 1.6876  | 1.7504 | Up | 3.07E-11  | 9.38E-11  |
| Unigene23341 | Potri.002G129400.2 | 5.5142  | 1.6422  | 1.7475 | Up | 8.22E-12  | 2.58E-11  |
| Unigene34132 | Potri.014G131000.1 | 9.5352  | 2.8402  | 1.7473 | Up | 8.63E-16  | 3.25E-15  |
| Unigene94344 | Potri.010G207800.1 | 25.7758 | 7.6773  | 1.7473 | Up | 1.29E-54  | 1.38E-53  |
| Unigene65885 | Potri.013G008900.1 | 5.0667  | 1.5098  | 1.7467 | Up | 2.78E-05  | 5.64E-05  |
| Unigene92296 | Potri.009G158700.4 | 7.5078  | 2.2373  | 1.7466 | Up | 2.46E-09  | 6.77E-09  |
| Unigene91375 | Potri.009G046300.1 | 4.194   | 1.2498  | 1.7466 | Up | 2.78E-05  | 5.64E-05  |
| Unigene30473 | Potri.010G003500.1 | 5.1257  | 1.5292  | 1.745  | Up | 7.72E-07  | 1.79E-06  |
| Unigene22990 | Potri.001G278800.4 | 11.6282 | 3.4692  | 1.745  | Up | 2.20E-12  | 7.12E-12  |
| Unigene15035 | Potri.004G002900.1 | 91.7469 | 27.3745 | 1.7448 | Up | 7.52E-63  | 9.39E-62  |
| Unigene70200 | Potri.001G205400.1 | 9.5178  | 2.8407  | 1.7444 | Up | 6.69E-14  | 2.32E-13  |
| Unigene14293 | Potri.013G145600.1 | 7.5345  | 2.2504  | 1.7433 | Up | 6.55E-10  | 1.86E-09  |
| Unigene37458 | Potri.010G042600.1 | 25.1944 | 7.5281  | 1.7427 | Up | 5.86E-23  | 2.87E-22  |
| Unigene37515 | Potri.016G019200.1 | 37.776  | 11.2929 | 1.7421 | Up | 6.72E-48  | 6.29E-47  |
| Unigene17036 | Potri.002G085600.1 | 65.1081 | 19.4791 | 1.7409 | Up | 1.02E-115 | 2.63E-114 |
| Unigene52751 | Potri.019G084600.1 | 3.1521  | 0.9433  | 1.7405 | Up | 2.67E-04  | 4.89E-04  |
| Unigene35311 | Potri.018G042900.1 | 4.6787  | 1.4002  | 1.7405 | Up | 2.67E-04  | 4.89E-04  |
| Unigene89751 | Potri.014G144200.1 | 3.6991  | 1.107   | 1.7405 | Up | 2.67E-04  | 4.89E-04  |
| Unigene51642 | Potri.011G080900.2 | 5.5032  | 1.6469  | 1.7405 | Up | 2.67E-04  | 4.89E-04  |
| Unigene19662 | Potri.009G135800.1 | 3.2858  | 0.9833  | 1.7405 | Up | 7.18E-06  | 1.54E-05  |
| Unigene61001 | Potri.008G193700.1 | 4.5518  | 1.3622  | 1.7405 | Up | 2.67E-04  | 4.89E-04  |
| Unigene35595 | Potri.008G173600.2 | 9.012   | 2.697   | 1.7405 | Up | 2.03E-07  | 4.92E-07  |
| Unigene82962 | Potri.007G133700.1 | 5.0671  | 1.5164  | 1.7405 | Up | 2.67E-04  | 4.89E-04  |
| Unigene35675 | Potri.004G101700.1 | 9.9712  | 2.984   | 1.7405 | Up | 7.18E-06  | 1.54E-05  |
| Unigene54567 | Potri.002G136400.4 | 4.2094  | 1.2597  | 1.7405 | Up | 2.67E-04  | 4.89E-04  |
| Unigene68092 | Potri.001G127700.3 | 4.5518  | 1.3622  | 1.7405 | Up | 2.67E-04  | 4.89E-04  |
| Unigene57613 | Potri.004G093700.1 | 4.4243  | 1.3241  | 1.7404 | Up | 2.03E-07  | 4.92E-07  |
| Unigene8301  | Potri.011G046400.2 | 12.3862 | 3.7085  | 1.7398 | Up | 3.62E-38  | 2.72E-37  |
| Unigene206   | Potri.018G024300.1 | 54.221  | 16.2443 | 1.7389 | Up | 2.58E-138 | 8.33E-137 |
| Unigene47900 | Potri.007G099400.1 | 36.9531 | 11.0727 | 1.7387 | Up | 3.15E-28  | 1.82E-27  |
| Unigene12382 | Potri.002G077100.2 | 7.635   | 2.2878  | 1.7387 | Up | 8.56E-41  | 6.84E-40  |
| Unigene22651 | Potri.017G146800.2 | 8.7185  | 2.6131  | 1.7383 | Up | 1.41E-12  | 4.59E-12  |
| Unigene6670  | Potri.010G108600.1 | 9.6225  | 2.8856  | 1.7375 | Up | 1.57E-09  | 4.34E-09  |
| Unigene42121 | Potri.002G126800.1 | 6.2813  | 1.8837  | 1.7375 | Up | 1.57E-09  | 4.34E-09  |
| Unigene46691 | Potri.013G132300.1 | 41.5063 | 12.4483 | 1.7374 | Up | 4.57E-63  | 5.73E-62  |
| Unigene94712 | Potri.017G148600.2 | 16.4557 | 4.9426  | 1.7352 | Up | 3.10E-15  | 1.14E-14  |
| Unigene23685 | Potri.006G246900.1 | 7.9491  | 2.3881  | 1.7349 | Up | 7.97E-19  | 3.39E-18  |

|               |                    |          |         |        |    |           |           |
|---------------|--------------------|----------|---------|--------|----|-----------|-----------|
| Unigene29523  | Potri.014G135900.3 | 55.0575  | 16.5419 | 1.7348 | Up | 1.85E-60  | 2.22E-59  |
| Unigene87740  | Potri.012G092100.1 | 10.0243  | 3.0139  | 1.7338 | Up | 1.41E-08  | 3.70E-08  |
| Unigene68809  | Potri.010G224700.1 | 3.3414   | 1.0046  | 1.7338 | Up | 6.79E-05  | 1.33E-04  |
| Unigene77182  | Potri.010G175000.4 | 6.9734   | 2.0966  | 1.7338 | Up | 6.79E-05  | 1.33E-04  |
| Unigene9450   | Potri.006G123800.1 | 18.8289  | 5.6611  | 1.7338 | Up | 8.31E-41  | 6.64E-40  |
| Unigene76846  | Potri.004G072400.1 | 14.0691  | 4.23    | 1.7338 | Up | 1.41E-08  | 3.70E-08  |
| Unigene4566   | Potri.008G067300.1 | 6.439    | 1.9374  | 1.7327 | Up | 1.11E-10  | 3.30E-10  |
| Unigene115103 | Potri.001G284700.1 | 14.6299  | 4.4019  | 1.7327 | Up | 1.11E-10  | 3.30E-10  |
| Unigene41256  | Potri.001G148800.1 | 12.3222  | 3.7076  | 1.7327 | Up | 1.11E-10  | 3.30E-10  |
| Unigene12260  | Potri.017G000600.1 | 15.6417  | 4.7076  | 1.7323 | Up | 4.94E-22  | 2.35E-21  |
| Unigene31715  | Potri.016G081000.3 | 12.0779  | 3.6358  | 1.732  | Up | 8.97E-13  | 2.96E-12  |
| Unigene89989  | Potri.007G096700.3 | 6.8551   | 2.0636  | 1.732  | Up | 4.88E-07  | 1.15E-06  |
| Unigene3543   | Potri.006G213500.1 | 4.5051   | 1.3562  | 1.732  | Up | 4.88E-07  | 1.15E-06  |
| Unigene41367  | Potri.006G146200.1 | 11.0517  | 3.3269  | 1.732  | Up | 8.97E-13  | 2.96E-12  |
| Unigene68525  | Potri.002G131700.1 | 3.7913   | 1.1413  | 1.732  | Up | 4.88E-07  | 1.15E-06  |
| Unigene2452   | Potri.005G062500.3 | 10.562   | 3.1808  | 1.7314 | Up | 1.34E-22  | 6.49E-22  |
| Unigene32085  | Potri.016G014600.1 | 35.2819  | 10.6398 | 1.7295 | Up | 3.89E-111 | 9.52E-110 |
| Unigene108759 | Potri.012G048200.1 | 202.7382 | 61.143  | 1.7294 | Up | 2.94E-95  | 5.92E-94  |
| Unigene52677  | Potri.018G118400.1 | 5.9775   | 1.8032  | 1.729  | Up | 1.74E-05  | 3.60E-05  |
| Unigene34152  | Potri.016G044300.1 | 6.3869   | 1.9267  | 1.729  | Up | 7.95E-12  | 2.50E-11  |
| Unigene27535  | Potri.011G109300.3 | 3.8139   | 1.1505  | 1.729  | Up | 1.74E-05  | 3.60E-05  |
| Unigene31121  | Potri.015G018200.1 | 21.0084  | 6.3395  | 1.7285 | Up | 2.93E-37  | 2.15E-36  |
| Unigene49212  | Potri.008G021900.1 | 17.8178  | 5.3779  | 1.7282 | Up | 8.58E-23  | 4.18E-22  |
| Unigene48805  | Potri.007G121900.1 | 15.248   | 4.6042  | 1.7276 | Up | 2.18E-38  | 1.65E-37  |
| Unigene20912  | Potri.010G148200.6 | 70.882   | 21.4045 | 1.7275 | Up | 3.39E-47  | 3.12E-46  |
| Unigene20196  | Potri.018G128300.3 | 5.134    | 1.5504  | 1.7274 | Up | 2.13E-12  | 6.89E-12  |
| Unigene93050  | Potri.009G152800.1 | 9.2897   | 2.8054  | 1.7274 | Up | 2.13E-12  | 6.89E-12  |
| Unigene114112 | Potri.016G098500.3 | 101.9052 | 30.7834 | 1.727  | Up | 3.06E-61  | 3.72E-60  |
| Unigene97284  | Potri.008G005800.1 | 13.9046  | 4.2008  | 1.7268 | Up | 3.90E-17  | 1.56E-16  |
| Unigene45222  | Potri.006G064200.1 | 80.1314  | 24.2136 | 1.7266 | Up | 6.23E-154 | 2.31E-152 |
| Unigene27355  | Potri.009G085100.1 | 4.7563   | 1.4384  | 1.7254 | Up | 4.52E-06  | 9.83E-06  |
| Unigene5254   | Potri.006G050800.1 | 4.6219   | 1.3977  | 1.7254 | Up | 4.52E-06  | 9.83E-06  |
| Unigene62950  | Potri.003G216700.6 | 3.0329   | 0.9172  | 1.7254 | Up | 4.52E-06  | 9.83E-06  |
| Unigene22554  | Potri.002G211600.1 | 5.5424   | 1.6761  | 1.7254 | Up | 4.67E-25  | 2.45E-24  |
| Unigene115374 | Potri.005G163300.1 | 71.4908  | 21.6275 | 1.7249 | Up | 5.11E-47  | 4.69E-46  |
| Unigene47256  | Potri.017G030100.1 | 96.48    | 29.1923 | 1.7246 | Up | 1.53E-71  | 2.20E-70  |
| Unigene54198  | Potri.015G074000.1 | 3.5927   | 1.0873  | 1.7243 | Up | 8.95E-09  | 2.38E-08  |
| Unigene26399  | Potri.003G150800.1 | 260.8378 | 78.9751 | 1.7237 | Up | 1.15E-166 | 4.77E-165 |
| Unigene30154  | Potri.017G001000.1 | 3.5471   | 1.0748  | 1.7226 | Up | 1.18E-06  | 2.69E-06  |

|               |                    |          |         |        |    |           |           |
|---------------|--------------------|----------|---------|--------|----|-----------|-----------|
| Unigene85453  | Potri.001G458600.4 | 8.2601   | 2.5029  | 1.7226 | Up | 1.18E-06  | 2.69E-06  |
| Unigene24348  | Potri.002G168600.1 | 15.0938  | 4.5753  | 1.722  | Up | 8.14E-26  | 4.37E-25  |
| Unigene32260  | Potri.006G178900.1 | 46.3949  | 14.0648 | 1.7219 | Up | 5.37E-134 | 1.66E-132 |
| Unigene10930  | Potri.011G110600.1 | 5.5032   | 1.6689  | 1.7214 | Up | 9.55E-24  | 4.80E-23  |
| Unigene49597  | Potri.010G115800.4 | 36.7206  | 11.1378 | 1.7211 | Up | 4.97E-38  | 3.72E-37  |
| Unigene109237 | Potri.010G118000.1 | 37.2995  | 11.3198 | 1.7203 | Up | 4.93E-19  | 2.12E-18  |
| Unigene9522   | Potri.001G239900.3 | 168.7262 | 51.2055 | 1.7203 | Up | 3.91E-135 | 1.22E-133 |
| Unigene65634  | Potri.017G000300.1 | 4.3423   | 1.3195  | 1.7185 | Up | 1.66E-04  | 3.11E-04  |
| Unigene37698  | Potri.006G187400.1 | 32.6162  | 9.9111  | 1.7185 | Up | 1.59E-17  | 6.45E-17  |
| Unigene88822  | Potri.002G018700.1 | 4.2659   | 1.2963  | 1.7185 | Up | 1.66E-04  | 3.11E-04  |
| Unigene42506  | Potri.003G198600.3 | 31.7383  | 9.6529  | 1.7172 | Up | 7.54E-94  | 1.49E-92  |
| Unigene3452   | Potri.010G232200.1 | 10.1293  | 3.0813  | 1.7169 | Up | 2.14E-08  | 5.55E-08  |
| Unigene9462   | Potri.005G193400.1 | 116.9533 | 35.5846 | 1.7166 | Up | 4.66E-111 | 1.14E-109 |
| Unigene93199  | Potri.014G129700.2 | 3.1482   | 0.9585  | 1.7157 | Up | 4.25E-05  | 8.45E-05  |
| Unigene117213 | Potri.016G054600.2 | 4.9022   | 1.4926  | 1.7156 | Up | 4.25E-05  | 8.45E-05  |
| Unigene88524  | Potri.015G136400.1 | 5.1217   | 1.5594  | 1.7156 | Up | 4.25E-05  | 8.45E-05  |
| Unigene71017  | Potri.014G111000.1 | 8.5362   | 2.599   | 1.7156 | Up | 4.25E-05  | 8.45E-05  |
| Unigene20946  | Potri.011G162400.1 | 3.8213   | 1.1635  | 1.7156 | Up | 4.25E-05  | 8.45E-05  |
| Unigene12980  | Potri.004G034100.2 | 19.3655  | 5.8962  | 1.7156 | Up | 2.31E-20  | 1.04E-19  |
| Unigene38195  | Potri.003G198600.3 | 67.9291  | 20.7072 | 1.7139 | Up | 1.13E-64  | 1.46E-63  |
| Unigene15401  | Potri.004G075600.1 | 5.499    | 1.6767  | 1.7135 | Up | 4.01E-10  | 1.15E-09  |
| Unigene10170  | Potri.002G243000.2 | 8.2028   | 2.5012  | 1.7135 | Up | 4.01E-10  | 1.15E-09  |
| Unigene31309  | Potri.006G049800.1 | 4.8072   | 1.4664  | 1.7129 | Up | 4.53E-15  | 1.65E-14  |
| Unigene41224  | Potri.005G020500.1 | 52.9324  | 16.1529 | 1.7124 | Up | 9.41E-49  | 8.96E-48  |
| Unigene25712  | Potri.004G081900.1 | 4.512    | 1.3773  | 1.7119 | Up | 2.84E-06  | 6.30E-06  |
| Unigene39009  | Potri.012G002500.1 | 14.3213  | 4.3755  | 1.7106 | Up | 2.05E-12  | 6.65E-12  |
| Unigene91769  | Potri.008G170200.1 | 6.3018   | 1.9267  | 1.7096 | Up | 1.95E-07  | 4.73E-07  |
| Unigene33167  | Potri.018G034500.1 | 18.5772  | 5.6812  | 1.7093 | Up | 8.34E-33  | 5.47E-32  |
| Unigene13973  | Potri.014G078900.5 | 12.7908  | 3.9118  | 1.7092 | Up | 3.98E-14  | 1.40E-13  |
| Unigene10500  | Potri.006G213500.1 | 6.3606   | 1.9458  | 1.7088 | Up | 5.13E-08  | 1.30E-07  |
| Unigene156    | Potri.018G097800.1 | 10.9842  | 3.3614  | 1.7083 | Up | 8.11E-78  | 1.29E-76  |
| Unigene9758   | Potri.001G273600.6 | 6.0582   | 1.8557  | 1.7069 | Up | 9.57E-10  | 2.69E-09  |
| Unigene46140  | Potri.017G017000.1 | 16.5945  | 5.0847  | 1.7065 | Up | 2.55E-10  | 7.40E-10  |
| Unigene47459  | Potri.014G115500.2 | 80.9085  | 24.7909 | 1.7065 | Up | 5.99E-37  | 4.37E-36  |
| Unigene117357 | Potri.002G094100.2 | 36.3592  | 11.1438 | 1.7061 | Up | 8.36E-30  | 5.05E-29  |
| Unigene39300  | Potri.006G259200.1 | 40.3375  | 12.3647 | 1.7059 | Up | 1.17E-59  | 1.39E-58  |
| Unigene28482  | Potri.005G256600.1 | 4.2206   | 1.2939  | 1.7057 | Up | 1.82E-11  | 5.62E-11  |
| Unigene21680  | Potri.019G074400.1 | 17.3036  | 5.3124  | 1.7036 | Up | 7.50E-48  | 7.02E-47  |
| Unigene49768  | Potri.001G076800.2 | 19.7577  | 6.0676  | 1.7032 | Up | 7.16E-19  | 3.06E-18  |

|               |                    |          |          |        |    |           |           |
|---------------|--------------------|----------|----------|--------|----|-----------|-----------|
| Unigene15458  | Potri.001G034200.2 | 69.4186  | 21.3484  | 1.7012 | Up | 7.39E-45  | 6.46E-44  |
| Unigene115995 | Potri.019G022300.1 | 12.8831  | 3.9656   | 1.6999 | Up | 6.07E-10  | 1.73E-09  |
| Unigene36483  | Potri.017G091000.1 | 3.4813   | 1.0716   | 1.6999 | Up | 1.23E-07  | 3.03E-07  |
| Unigene28525  | Potri.015G078200.1 | 6.5969   | 2.0306   | 1.6999 | Up | 3.10E-12  | 9.95E-12  |
| Unigene31341  | Potri.010G217400.1 | 3.7035   | 1.14     | 1.6999 | Up | 1.04E-04  | 1.99E-04  |
| Unigene37061  | Potri.006G123200.1 | 4.8956   | 1.5069   | 1.6999 | Up | 1.04E-04  | 1.99E-04  |
| Unigene11523  | Potri.005G017300.1 | 17.449   | 5.3711   | 1.6999 | Up | 7.22E-48  | 6.75E-47  |
| Unigene88493  | Potri.001G304100.1 | 8.599    | 2.6469   | 1.6999 | Up | 1.23E-07  | 3.03E-07  |
| Unigene4541   | Potri.010G150400.1 | 5.0211   | 1.5456   | 1.6998 | Up | 1.04E-04  | 1.99E-04  |
| Unigene44625  | Potri.003G222300.2 | 4.2772   | 1.3166   | 1.6998 | Up | 1.62E-14  | 5.76E-14  |
| Unigene92292  | Potri.002G200500.1 | 12.8592  | 3.9583   | 1.6998 | Up | 1.62E-14  | 5.76E-14  |
| Unigene31165  | Potri.002G021800.1 | 3.9099   | 1.2036   | 1.6998 | Up | 1.79E-06  | 4.04E-06  |
| Unigene26823  | Potri.002G018600.1 | 3.3474   | 1.0304   | 1.6998 | Up | 6.87E-06  | 1.48E-05  |
| Unigene10700  | Potri.010G116000.1 | 88.3347  | 27.2096  | 1.6989 | Up | 1.11E-177 | 4.95E-176 |
| Unigene12117  | Potri.003G210600.1 | 6.9376   | 2.1415   | 1.6958 | Up | 3.29E-30  | 2.01E-29  |
| Unigene49657  | Potri.015G093200.1 | 18.1423  | 5.6041   | 1.6948 | Up | 5.29E-13  | 1.76E-12  |
| Unigene51304  | Potri.013G132400.1 | 11.9923  | 3.705    | 1.6946 | Up | 1.97E-12  | 6.38E-12  |
| Unigene15534  | Potri.014G113200.1 | 36.2065  | 11.1871  | 1.6944 | Up | 7.40E-23  | 3.61E-22  |
| Unigene40346  | Potri.005G094400.3 | 7.3633   | 2.2759   | 1.6939 | Up | 2.74E-11  | 8.41E-11  |
| Unigene38570  | Potri.001G126700.1 | 6.9975   | 2.1633   | 1.6936 | Up | 1.03E-10  | 3.05E-10  |
| Unigene23051  | Potri.002G131900.1 | 9.5061   | 2.9393   | 1.6934 | Up | 1.86E-19  | 8.12E-19  |
| Unigene34765  | Potri.003G021700.1 | 5.6327   | 1.7421   | 1.693  | Up | 2.54E-18  | 1.06E-17  |
| Unigene117733 | Potri.010G062900.1 | 356.1664 | 110.1647 | 1.6929 | Up | 1.81E-290 | 1.54E-288 |
| Unigene22174  | Potri.011G043300.1 | 44.6707  | 13.824   | 1.6922 | Up | 3.05E-106 | 7.01E-105 |
| Unigene42150  | Potri.010G116500.1 | 6.7377   | 2.0855   | 1.6919 | Up | 4.76E-16  | 1.82E-15  |
| Unigene23427  | Potri.009G079100.1 | 7.7328   | 2.3959   | 1.6904 | Up | 4.47E-26  | 2.42E-25  |
| Unigene91585  | Potri.019G116400.1 | 6.3618   | 1.9717   | 1.69   | Up | 2.95E-07  | 7.07E-07  |
| Unigene36172  | Potri.010G078800.2 | 11.6861  | 3.6218   | 1.69   | Up | 2.95E-07  | 7.07E-07  |
| Unigene15994  | Potri.006G031700.1 | 21.1075  | 6.5418   | 1.69   | Up | 3.36E-13  | 1.13E-12  |
| Unigene41849  | Potri.003G090400.4 | 8.3489   | 2.5884   | 1.6895 | Up | 1.25E-12  | 4.10E-12  |
| Unigene5760   | Potri.009G004900.1 | 8.6076   | 2.6696   | 1.689  | Up | 2.21E-17  | 8.92E-17  |
| Unigene39683  | Potri.002G016500.1 | 24.2596  | 7.5247   | 1.6888 | Up | 9.60E-54  | 1.01E-52  |
| Unigene19813  | Potri.016G088600.2 | 98.749   | 30.6497  | 1.6879 | Up | 6.84E-64  | 8.72E-63  |
| Unigene114100 | Potri.007G031600.1 | 101.0196 | 31.3566  | 1.6878 | Up | 1.24E-58  | 1.44E-57  |
| Unigene9312   | Potri.001G087900.2 | 3.1802   | 0.9872   | 1.6877 | Up | 4.31E-06  | 9.40E-06  |
| Unigene79502  | Potri.006G143000.2 | 8.0148   | 2.4908   | 1.6861 | Up | 1.66E-05  | 3.44E-05  |
| Unigene112525 | Potri.001G032900.1 | 152.5613 | 47.4317  | 1.6855 | Up | 5.45E-81  | 9.05E-80  |
| Unigene58540  | Potri.008G005800.1 | 9.614    | 2.9899   | 1.685  | Up | 9.08E-25  | 4.72E-24  |
| Unigene23058  | Potri.001G430700.2 | 35.2627  | 10.9721  | 1.6843 | Up | 1.10E-45  | 9.81E-45  |

|               |                    |          |         |        |    |           |           |
|---------------|--------------------|----------|---------|--------|----|-----------|-----------|
| Unigene78513  | Potri.T056700.1    | 14.1644  | 4.4085  | 1.6839 | Up | 1.30E-08  | 3.41E-08  |
| Unigene98243  | Potri.006G233200.1 | 26.9852  | 8.3988  | 1.6839 | Up | 1.78E-19  | 7.78E-19  |
| Unigene38961  | Potri.017G057200.1 | 16.9194  | 5.2673  | 1.6835 | Up | 4.28E-26  | 2.32E-25  |
| Unigene30706  | Potri.008G158900.1 | 5.997    | 1.8673  | 1.6833 | Up | 2.65E-15  | 9.79E-15  |
| Unigene28589  | Potri.002G184300.4 | 8.6962   | 2.7091  | 1.6826 | Up | 4.90E-08  | 1.24E-07  |
| Unigene27392  | Potri.005G242700.6 | 6.8041   | 2.1197  | 1.6825 | Up | 4.90E-08  | 1.24E-07  |
| Unigene88354  | Potri.010G072900.3 | 4.2692   | 1.3314  | 1.681  | Up | 2.54E-04  | 4.66E-04  |
| Unigene92497  | Potri.002G127900.3 | 5.8935   | 1.838   | 1.681  | Up | 1.86E-07  | 4.52E-07  |
| Unigene34159  | Potri.001G043000.4 | 26.7078  | 8.3326  | 1.6804 | Up | 3.55E-57  | 4.01E-56  |
| Unigene14867  | Potri.001G384000.1 | 30.7173  | 9.5867  | 1.6799 | Up | 1.44E-21  | 6.77E-21  |
| Unigene41234  | Potri.003G165000.2 | 10.9045  | 3.4037  | 1.6797 | Up | 5.80E-10  | 1.65E-09  |
| Unigene30985  | Potri.013G092000.1 | 26.46    | 8.2614  | 1.6794 | Up | 6.75E-46  | 6.05E-45  |
| Unigene57674  | Potri.T110400.1    | 6.6849   | 2.0875  | 1.6791 | Up | 7.08E-07  | 1.65E-06  |
| Unigene94030  | Potri.006G271500.1 | 3.5895   | 1.1209  | 1.6791 | Up | 7.08E-07  | 1.65E-06  |
| Unigene781    | Potri.003G088400.4 | 36.2654  | 11.3333 | 1.678  | Up | 5.39E-82  | 9.08E-81  |
| Unigene52273  | Potri.002G090900.2 | 7.0829   | 2.2154  | 1.6768 | Up | 2.62E-11  | 8.05E-11  |
| Unigene42692  | Potri.007G072600.1 | 117.386  | 36.7463 | 1.6756 | Up | 3.94E-259 | 2.86E-257 |
| Unigene40301  | Potri.005G257900.2 | 40.735   | 12.7562 | 1.6751 | Up | 5.18E-54  | 5.49E-53  |
| Unigene17716  | Potri.018G100200.1 | 28.4244  | 8.9157  | 1.6727 | Up | 2.94E-20  | 1.32E-19  |
| Unigene117413 | Potri.015G109200.1 | 139.148  | 43.6456 | 1.6727 | Up | 3.23E-107 | 7.53E-106 |
| Unigene621    | Potri.002G081600.1 | 10.7334  | 3.3672  | 1.6725 | Up | 3.75E-22  | 1.79E-21  |
| Unigene111342 | Potri.002G032500.1 | 268.3317 | 84.1811 | 1.6724 | Up | 9.34E-133 | 2.86E-131 |
| Unigene49118  | Potri.008G030300.1 | 53.6008  | 16.8183 | 1.6722 | Up | 1.10E-62  | 1.37E-61  |
| Unigene30820  | Potri.013G043300.1 | 11.7018  | 3.6771  | 1.6701 | Up | 5.18E-09  | 1.40E-08  |
| Unigene29930  | Potri.011G105500.1 | 4.8064   | 1.5103  | 1.6701 | Up | 5.18E-09  | 1.40E-08  |
| Unigene60388  | Potri.010G148100.3 | 3.6991   | 1.1624  | 1.6701 | Up | 4.03E-05  | 8.05E-05  |
| Unigene2589   | Potri.007G123400.1 | 4.7922   | 1.5059  | 1.6701 | Up | 6.22E-11  | 1.87E-10  |
| Unigene68413  | Potri.001G155000.1 | 7.5703   | 2.3788  | 1.6701 | Up | 1.18E-16  | 4.60E-16  |
| Unigene10189  | Potri.016G061900.1 | 45.0235  | 14.1537 | 1.6695 | Up | 3.55E-55  | 3.85E-54  |
| Unigene14106  | Potri.017G085400.3 | 7.6843   | 2.4172  | 1.6686 | Up | 2.83E-12  | 9.10E-12  |
| Unigene11248  | Potri.014G124000.1 | 7.4432   | 2.3426  | 1.6678 | Up | 1.61E-15  | 6.00E-15  |
| Unigene69117  | Potri.010G250000.1 | 4.9253   | 1.5502  | 1.6678 | Up | 1.95E-08  | 5.09E-08  |
| Unigene89420  | Potri.004G184500.1 | 9.3512   | 2.9431  | 1.6678 | Up | 1.95E-08  | 5.09E-08  |
| Unigene28419  | Potri.002G055300.1 | 9.2728   | 2.9185  | 1.6678 | Up | 1.95E-08  | 5.09E-08  |
| Unigene35264  | Potri.T107500.1    | 6.4825   | 2.0415  | 1.6669 | Up | 1.70E-06  | 3.85E-06  |
| Unigene51023  | Potri.002G081000.3 | 17.6969  | 5.5731  | 1.6669 | Up | 1.05E-11  | 3.30E-11  |
| Unigene39302  | Potri.005G170400.1 | 16.2949  | 5.1325  | 1.6667 | Up | 3.38E-25  | 1.78E-24  |
| Unigene39419  | Potri.006G216500.1 | 19.402   | 6.1122  | 1.6664 | Up | 4.13E-50  | 4.04E-49  |
| Unigene33810  | Potri.017G029800.4 | 18.6498  | 5.8774  | 1.6659 | Up | 1.24E-24  | 6.43E-24  |

|               |                     |         |         |        |    |          |          |
|---------------|---------------------|---------|---------|--------|----|----------|----------|
| Unigene53541  | Potri.014G140900.1  | 7.3171  | 2.3073  | 1.6651 | Up | 1.58E-04 | 2.95E-04 |
| Unigene53929  | Potri.014G121200.1  | 3.2677  | 1.0304  | 1.6651 | Up | 1.58E-04 | 2.95E-04 |
| Unigene29152  | Potri.010G104200.2  | 6.5168  | 2.0549  | 1.6651 | Up | 3.94E-11 | 1.20E-10 |
| Unigene91493  | Potri.010G063600.1  | 3.6153  | 1.14    | 1.6651 | Up | 1.58E-04 | 2.95E-04 |
| Unigene8721   | Potri.009G170600.3  | 4.1557  | 1.3104  | 1.6651 | Up | 1.58E-04 | 2.95E-04 |
| Unigene5550   | Potri.009G032800.1  | 6.2675  | 1.9763  | 1.6651 | Up | 1.58E-04 | 2.95E-04 |
| Unigene36982  | Potri.005G154000.1  | 4.0034  | 1.2624  | 1.6651 | Up | 1.58E-04 | 2.95E-04 |
| Unigene27321  | Potri.002G117000.6  | 3.5815  | 1.1293  | 1.6651 | Up | 1.58E-04 | 2.95E-04 |
| Unigene88514  | Potri.015G132600.1  | 4.565   | 1.4395  | 1.665  | Up | 1.58E-04 | 2.95E-04 |
| Unigene10060  | Potri.004G048600.1  | 7.5462  | 2.3809  | 1.6642 | Up | 1.79E-12 | 5.83E-12 |
| Unigene30602  | Potri.003G151500.2  | 9.1402  | 2.8846  | 1.6639 | Up | 3.28E-09 | 8.92E-09 |
| Unigene64591  | Potri.016G023000.2  | 4.2419  | 1.3395  | 1.663  | Up | 6.52E-06 | 1.40E-05 |
| Unigene4504   | Potri.004G193600.1  | 3.9841  | 1.2581  | 1.663  | Up | 6.52E-06 | 1.40E-05 |
| Unigene64682  | Potri.018G121900.1  | 3.4893  | 1.1019  | 1.6629 | Up | 6.52E-06 | 1.40E-05 |
| Unigene51742  | Potri.004G236000.1  | 67.2049 | 21.2433 | 1.6616 | Up | 1.55E-33 | 1.04E-32 |
| Unigene35209  | Potri.008G201400.5  | 12.9233 | 4.0852  | 1.6615 | Up | 1.41E-14 | 5.04E-14 |
| Unigene12299  | Potri.010G096600.3  | 6.4992  | 2.0549  | 1.6612 | Up | 1.23E-08 | 3.24E-08 |
| Unigene19413  | Potri.007G144600.3  | 9.6122  | 3.0392  | 1.6612 | Up | 1.23E-08 | 3.24E-08 |
| Unigene10413  | Potri.006G146300.1  | 6.5488  | 2.0706  | 1.6612 | Up | 1.23E-08 | 3.24E-08 |
| Unigene21108  | Potri.012G104700.1  | 7.8554  | 2.4857  | 1.66   | Up | 1.14E-12 | 3.73E-12 |
| Unigene11215  | Potri.004G048600.1  | 14.8637 | 4.7048  | 1.6596 | Up | 1.61E-30 | 9.93E-30 |
| Unigene52343  | Potri.001G372100.10 | 24.7491 | 7.8349  | 1.6594 | Up | 5.21E-18 | 2.15E-17 |
| Unigene47734  | Potri.006G262300.1  | 30.7286 | 9.734   | 1.6585 | Up | 4.20E-51 | 4.19E-50 |
| Unigene27787  | Potri.016G075900.1  | 4.2462  | 1.3455  | 1.658  | Up | 2.52E-05 | 5.13E-05 |
| Unigene65565  | Potri.005G235700.2  | 6.7637  | 2.1432  | 1.658  | Up | 1.07E-06 | 2.45E-06 |
| Unigene52383  | Potri.005G159600.1  | 16.9342 | 5.366   | 1.658  | Up | 1.94E-13 | 6.61E-13 |
| Unigene49762  | Potri.002G107300.3  | 14.3028 | 4.5322  | 1.658  | Up | 1.94E-13 | 6.61E-13 |
| Unigene11059  | Potri.001G242100.1  | 20.2191 | 6.4092  | 1.6575 | Up | 1.07E-44 | 9.36E-44 |
| Unigene24336  | Potri.009G138900.1  | 8.4825  | 2.6915  | 1.6561 | Up | 7.22E-13 | 2.39E-12 |
| Unigene15897  | Potri.006G033200.1  | 16.9543 | 5.3837  | 1.655  | Up | 7.79E-09 | 2.07E-08 |
| Unigene18591  | Potri.003G076400.1  | 5.3383  | 1.6959  | 1.6543 | Up | 1.76E-07 | 4.30E-07 |
| Unigene109829 | Potri.013G033000.2  | 60.9112 | 19.3553 | 1.654  | Up | 3.24E-29 | 1.92E-28 |
| Unigene21154  | Potri.013G033000.2  | 43.6695 | 13.878  | 1.6538 | Up | 1.95E-49 | 1.88E-48 |
| Unigene34630  | Potri.016G091600.1  | 9.914   | 3.1518  | 1.6533 | Up | 5.91E-11 | 1.78E-10 |
| Unigene14770  | Potri.007G041300.1  | 6.1163  | 1.9444  | 1.6533 | Up | 5.91E-11 | 1.78E-10 |
| Unigene9198   | Potri.018G053800.5  | 4.0724  | 1.2963  | 1.6515 | Up | 9.80E-05 | 1.89E-04 |
| Unigene52904  | Potri.013G014800.4  | 5.5445  | 1.7649  | 1.6515 | Up | 9.80E-05 | 1.89E-04 |
| Unigene47089  | Potri.012G107100.1  | 4.3303  | 1.3784  | 1.6515 | Up | 9.80E-05 | 1.89E-04 |
| Unigene25794  | Potri.009G013600.1  | 5.5445  | 1.7649  | 1.6515 | Up | 9.80E-05 | 1.89E-04 |



|               |                    |          |         |        |    |           |           |
|---------------|--------------------|----------|---------|--------|----|-----------|-----------|
| Unigene87327  | Potri.003G044100.1 | 47.0402  | 14.9735 | 1.6515 | Up | 2.96E-32  | 1.92E-31  |
| Unigene12684  | Potri.002G248400.2 | 38.768   | 12.3403 | 1.6515 | Up | 3.33E-83  | 5.69E-82  |
| Unigene12857  | Potri.002G027600.1 | 8.7764   | 2.7936  | 1.6515 | Up | 1.34E-18  | 5.67E-18  |
| Unigene119301 | Potri.006G224000.1 | 94.585   | 30.1089 | 1.6514 | Up | 9.87E-133 | 3.02E-131 |
| Unigene49631  | Potri.001G442800.1 | 76.7305  | 24.4301 | 1.6511 | Up | 1.14E-101 | 2.49E-100 |
| Unigene89057  | Potri.010G202400.3 | 17.0911  | 5.443   | 1.6508 | Up | 7.83E-14  | 2.71E-13  |
| Unigene70151  | Potri.014G145000.3 | 3.9645   | 1.2633  | 1.6499 | Up | 6.71E-07  | 1.56E-06  |
| Unigene8415   | Potri.014G115500.2 | 198.0999 | 63.222  | 1.6477 | Up | 0         | 0         |
| Unigene14442  | Potri.010G200000.4 | 4.7729   | 1.5236  | 1.6474 | Up | 1.57E-05  | 3.26E-05  |
| Unigene82156  | Potri.004G041000.1 | 7.7767   | 2.4825  | 1.6474 | Up | 1.57E-05  | 3.26E-05  |
| Unigene74233  | Potri.003G159200.2 | 18.7365  | 5.9811  | 1.6474 | Up | 8.28E-10  | 2.33E-09  |
| Unigene28725  | Potri.001G113100.1 | 6.0425   | 1.9289  | 1.6474 | Up | 1.11E-07  | 2.74E-07  |
| Unigene19458  | Potri.010G110100.2 | 21.3851  | 6.8315  | 1.6463 | Up | 8.50E-15  | 3.07E-14  |
| Unigene82880  | Potri.002G247500.1 | 9.0082   | 2.8812  | 1.6446 | Up | 2.56E-06  | 5.70E-06  |
| Unigene15824  | Potri.014G150200.1 | 8.0005   | 2.5625  | 1.6425 | Up | 4.22E-07  | 1.00E-06  |
| Unigene48972  | Potri.008G103300.1 | 12.2493  | 3.9234  | 1.6425 | Up | 5.23E-10  | 1.49E-09  |
| Unigene44419  | Potri.003G141900.4 | 188.1996 | 60.3033 | 1.642  | Up | 6.00E-306 | 5.44E-304 |
| Unigene69839  | Potri.001G348000.1 | 3.733    | 1.1966  | 1.6414 | Up | 8.84E-11  | 2.64E-10  |
| Unigene33626  | Potri.003G145100.1 | 60.3586  | 19.3536 | 1.641  | Up | 2.22E-72  | 3.23E-71  |
| Unigene17648  | Potri.002G103100.2 | 9.3685   | 3.0045  | 1.6407 | Up | 4.70E-18  | 1.95E-17  |
| Unigene42094  | Potri.004G187700.1 | 96.3108  | 30.8886 | 1.6406 | Up | 4.57E-81  | 7.59E-80  |
| Unigene50503  | Potri.010G115800.1 | 56.698   | 18.186  | 1.6405 | Up | 2.12E-65  | 2.78E-64  |
| Unigene59590  | Potri.009G059700.2 | 10.5219  | 3.3753  | 1.6403 | Up | 3.43E-15  | 1.26E-14  |
| Unigene6276   | Potri.017G009600.1 | 14.2527  | 4.5739  | 1.6397 | Up | 1.17E-08  | 3.07E-08  |
| Unigene66830  | Potri.003G159800.2 | 4.0208   | 1.2904  | 1.6397 | Up | 6.10E-05  | 1.19E-04  |
| Unigene5680   | Potri.001G014000.4 | 5.9494   | 1.9093  | 1.6397 | Up | 2.55E-12  | 8.22E-12  |
| Unigene18897  | Potri.001G009100.1 | 6.9567   | 2.2325  | 1.6397 | Up | 2.55E-12  | 8.22E-12  |
| Unigene30030  | Potri.014G148700.4 | 5.6097   | 1.8025  | 1.6379 | Up | 9.83E-06  | 2.08E-05  |
| Unigene113253 | Potri.001G072100.1 | 16.8736  | 5.4218  | 1.6379 | Up | 3.31E-10  | 9.55E-10  |
| Unigene22714  | Potri.014G085700.3 | 30.7453  | 9.8858  | 1.6369 | Up | 4.90E-41  | 3.94E-40  |
| Unigene38412  | Potri.015G051300.1 | 54.2826  | 17.4611 | 1.6363 | Up | 1.81E-145 | 6.23E-144 |
| Unigene1625   | Potri.002G170900.1 | 8.6486   | 2.7821  | 1.6363 | Up | 1.10E-17  | 4.50E-17  |
| Unigene21299  | Potri.007G027600.1 | 56.0545  | 18.0432 | 1.6354 | Up | 1.65E-224 | 9.85E-223 |
| Unigene585    | Potri.002G027600.1 | 12.921   | 4.1594  | 1.6353 | Up | 2.82E-33  | 1.87E-32  |
| Unigene66234  | Potri.015G074000.1 | 4.4392   | 1.4293  | 1.635  | Up | 4.41E-08  | 1.12E-07  |
| Unigene36576  | Potri.009G077200.1 | 5.6143   | 1.8076  | 1.635  | Up | 4.41E-08  | 1.12E-07  |
| Unigene21486  | Potri.016G088600.2 | 47.529   | 15.3041 | 1.6349 | Up | 1.20E-82  | 2.04E-81  |
| Unigene17390  | Potri.004G002900.1 | 18.5992  | 5.9897  | 1.6347 | Up | 1.38E-15  | 5.16E-15  |
| Unigene100581 | Potri.007G134600.1 | 20.8806  | 6.7296  | 1.6336 | Up | 2.09E-10  | 6.10E-10  |

|               |                    |          |         |        |    |           |           |
|---------------|--------------------|----------|---------|--------|----|-----------|-----------|
| Unigene30930  | Potri.008G037700.1 | 87.1183  | 28.0879 | 1.633  | Up | 5.47E-53  | 5.68E-52  |
| Unigene23838  | Potri.010G026500.1 | 11.9024  | 3.8382  | 1.6328 | Up | 3.47E-35  | 2.41E-34  |
| Unigene43640  | Potri.009G156200.1 | 7.7946   | 2.5145  | 1.6322 | Up | 5.11E-15  | 1.86E-14  |
| Unigene16109  | Potri.013G067500.2 | 43.4704  | 14.0353 | 1.631  | Up | 1.06E-25  | 5.68E-25  |
| Unigene9001   | Potri.018G076600.9 | 4.0107   | 1.2963  | 1.6295 | Up | 1.01E-06  | 2.32E-06  |
| Unigene88068  | Potri.018G022200.4 | 4.5766   | 1.4792  | 1.6295 | Up | 2.39E-04  | 4.39E-04  |
| Unigene93745  | Potri.016G113800.1 | 3.5244   | 1.1391  | 1.6295 | Up | 6.15E-06  | 1.33E-05  |
| Unigene93829  | Potri.012G066700.2 | 9.7104   | 3.1385  | 1.6295 | Up | 1.89E-14  | 6.73E-14  |
| Unigene15288  | Potri.005G207300.1 | 15.9098  | 5.1422  | 1.6295 | Up | 2.77E-08  | 7.14E-08  |
| Unigene56774  | Potri.002G099900.1 | 3.3543   | 1.0841  | 1.6295 | Up | 3.80E-05  | 7.60E-05  |
| Unigene109887 | Potri.002G032500.1 | 8.5549   | 2.765   | 1.6295 | Up | 3.80E-05  | 7.60E-05  |
| Unigene14736  | Potri.001G172400.1 | 3.5105   | 1.1346  | 1.6295 | Up | 1.67E-07  | 4.06E-07  |
| Unigene41590  | Potri.018G021000.1 | 3.76     | 1.2153  | 1.6294 | Up | 3.80E-05  | 7.60E-05  |
| Unigene86607  | Potri.013G015300.1 | 4.9078   | 1.5863  | 1.6294 | Up | 2.39E-04  | 4.39E-04  |
| Unigene7150   | Potri.001G066400.2 | 5.2782   | 1.706   | 1.6294 | Up | 6.15E-06  | 1.33E-05  |
| Unigene25868  | Potri.009G073000.1 | 21.0914  | 6.8281  | 1.6271 | Up | 6.07E-17  | 2.40E-16  |
| Unigene43045  | Potri.001G383200.1 | 4.8569   | 1.5732  | 1.6263 | Up | 9.12E-25  | 4.74E-24  |
| Unigene13654  | Potri.018G044800.1 | 63.6532  | 20.6205 | 1.6262 | Up | 8.08E-232 | 5.00E-230 |
| Unigene87562  | Potri.014G102800.1 | 15.6493  | 5.0707  | 1.6258 | Up | 1.42E-11  | 4.40E-11  |
| Unigene27532  | Potri.009G029400.1 | 119.4008 | 38.7053 | 1.6252 | Up | 6.20E-87  | 1.12E-85  |
| Unigene16787  | Potri.006G262300.1 | 27.2806  | 8.8433  | 1.6252 | Up | 1.14E-18  | 4.84E-18  |
| Unigene59166  | Potri.013G110600.1 | 6.0693   | 1.968   | 1.6248 | Up | 2.93E-09  | 8.01E-09  |
| Unigene87092  | Potri.002G256900.1 | 34.661   | 11.2415 | 1.6245 | Up | 1.93E-23  | 9.62E-23  |
| Unigene25606  | Potri.006G234600.2 | 16.6772  | 5.4095  | 1.6243 | Up | 1.75E-08  | 4.56E-08  |
| Unigene2849   | Potri.003G118400.4 | 13.1502  | 4.2661  | 1.6241 | Up | 6.45E-22  | 3.06E-21  |
| Unigene88389  | Potri.006G262300.1 | 18.6498  | 6.052   | 1.6237 | Up | 4.45E-14  | 1.56E-13  |
| Unigene49523  | Potri.001G090700.3 | 9.1055   | 2.9548  | 1.6237 | Up | 1.05E-07  | 2.59E-07  |
| Unigene36297  | Potri.013G102300.3 | 18.5229  | 6.0141  | 1.6229 | Up | 1.53E-12  | 4.97E-12  |
| Unigene6391   | Potri.019G125000.1 | 16.1713  | 5.253   | 1.6222 | Up | 1.42E-16  | 5.54E-16  |
| Unigene93783  | Potri.004G155700.2 | 3.6489   | 1.1856  | 1.6218 | Up | 3.85E-06  | 8.46E-06  |
| Unigene23389  | Potri.010G100300.1 | 6.479    | 2.1058  | 1.6214 | Up | 1.36E-28  | 7.90E-28  |
| Unigene32980  | Potri.003G035700.4 | 118.4122 | 38.5058 | 1.6207 | Up | 2.46E-161 | 9.70E-160 |
| Unigene62854  | Potri.003G037100.1 | 4.0262   | 1.3095  | 1.6204 | Up | 2.37E-05  | 4.83E-05  |
| Unigene93591  | Potri.001G076800.1 | 15.7473  | 5.1229  | 1.6201 | Up | 8.73E-21  | 3.98E-20  |
| Unigene20249  | Potri.009G041400.4 | 66.134   | 21.5176 | 1.6199 | Up | 3.01E-39  | 2.32E-38  |
| Unigene38398  | Potri.003G096100.1 | 18.2768  | 5.9474  | 1.6197 | Up | 5.05E-20  | 2.25E-19  |
| Unigene24306  | Potri.008G063600.3 | 18.5749  | 6.052   | 1.6179 | Up | 3.21E-20  | 1.44E-19  |
| Unigene7625   | Potri.016G056200.6 | 4.9281   | 1.6074  | 1.6163 | Up | 1.17E-09  | 3.27E-09  |
| Unigene22455  | Potri.019G045800.2 | 8.4447   | 2.7561  | 1.6154 | Up | 1.28E-24  | 6.61E-24  |

|               |                    |          |         |        |    |           |           |
|---------------|--------------------|----------|---------|--------|----|-----------|-----------|
| Unigene63775  | Potri.017G063300.1 | 3.2477   | 1.0603  | 1.6149 | Up | 2.41E-06  | 5.37E-06  |
| Unigene13302  | Potri.010G171600.2 | 11.2404  | 3.6738  | 1.6133 | Up | 1.42E-21  | 6.68E-21  |
| Unigene23480  | Potri.002G095300.1 | 36.6342  | 11.9754 | 1.6131 | Up | 1.45E-71  | 2.09E-70  |
| Unigene43571  | Potri.002G003000.6 | 58.6857  | 19.1855 | 1.613  | Up | 1.11E-105 | 2.53E-104 |
| Unigene67161  | Potri.001G442200.1 | 4.2286   | 1.3824  | 1.613  | Up | 2.27E-12  | 7.33E-12  |
| Unigene38703  | Potri.005G192600.2 | 24.6488  | 8.0587  | 1.6129 | Up | 2.42E-38  | 1.82E-37  |
| Unigene44424  | Potri.016G139800.1 | 6.5479   | 2.1415  | 1.6124 | Up | 7.36E-10  | 2.08E-09  |
| Unigene33886  | Potri.006G262300.1 | 16.0985  | 5.2651  | 1.6124 | Up | 2.52E-18  | 1.05E-17  |
| Unigene45356  | Potri.012G070700.1 | 108.2056 | 35.4107 | 1.6115 | Up | 1.30E-132 | 3.97E-131 |
| Unigene107426 | Potri.001G104400.2 | 48.2482  | 15.7942 | 1.6111 | Up | 5.23E-21  | 2.41E-20  |
| Unigene32025  | Potri.001G152600.1 | 44.4559  | 14.5632 | 1.61   | Up | 3.17E-93  | 6.19E-92  |
| Unigene11870  | Potri.001G187500.1 | 10.1404  | 3.3233  | 1.6094 | Up | 6.32E-23  | 3.10E-22  |
| Unigene68261  | Potri.015G098100.1 | 7.0434   | 2.3095  | 1.6087 | Up | 4.65E-10  | 1.33E-09  |
| Unigene58425  | Potri.014G129000.1 | 6.4181   | 2.1045  | 1.6087 | Up | 1.51E-06  | 3.42E-06  |
| Unigene17837  | Potri.011G000900.1 | 6.4022   | 2.0992  | 1.6087 | Up | 9.18E-05  | 1.77E-04  |
| Unigene47208  | Potri.005G020200.1 | 4.5105   | 1.479   | 1.6087 | Up | 4.65E-10  | 1.33E-09  |
| Unigene42325  | Potri.004G051100.3 | 8.8442   | 2.9     | 1.6087 | Up | 2.61E-08  | 6.72E-08  |
| Unigene37330  | Potri.001G084700.1 | 8.2755   | 2.7135  | 1.6087 | Up | 1.51E-06  | 3.42E-06  |
| Unigene46100  | Potri.008G117900.4 | 3.5159   | 1.1529  | 1.6086 | Up | 9.18E-05  | 1.77E-04  |
| Unigene47539  | Potri.018G142900.3 | 12.5867  | 4.1343  | 1.6062 | Up | 9.83E-14  | 3.39E-13  |
| Unigene21258  | Potri.007G113400.1 | 20.9313  | 6.8767  | 1.6059 | Up | 1.59E-169 | 6.68E-168 |
| Unigene25611  | Potri.001G034200.1 | 61.8544  | 20.3214 | 1.6059 | Up | 1.06E-55  | 1.17E-54  |
| Unigene41720  | Potri.006G105100.1 | 47.6909  | 15.6734 | 1.6054 | Up | 5.19E-34  | 3.50E-33  |
| Unigene57563  | Potri.014G078300.1 | 4.2321   | 1.391   | 1.6053 | Up | 9.21E-06  | 1.95E-05  |
| Unigene70588  | Potri.013G092000.1 | 11.0034  | 3.6167  | 1.6052 | Up | 9.21E-06  | 1.95E-05  |
| Unigene111985 | Potri.011G117500.1 | 81.6515  | 26.8464 | 1.6048 | Up | 2.66E-40  | 2.10E-39  |
| Unigene7201   | Potri.014G129700.2 | 12.6802  | 4.1693  | 1.6047 | Up | 5.75E-13  | 1.91E-12  |
| Unigene9264   | Potri.005G207300.1 | 16.9443  | 5.5714  | 1.6047 | Up | 5.75E-13  | 1.91E-12  |
| Unigene37260  | Potri.003G006800.1 | 7.2315   | 2.3783  | 1.6044 | Up | 1.64E-08  | 4.29E-08  |
| Unigene99611  | Potri.012G014100.2 | 23.0705  | 7.5905  | 1.6038 | Up | 6.23E-14  | 2.16E-13  |
| Unigene45087  | Potri.010G226000.5 | 59.9212  | 19.7224 | 1.6032 | Up | 8.80E-163 | 3.52E-161 |
| Unigene89049  | Potri.011G080900.2 | 7.7394   | 2.5478  | 1.603  | Up | 9.45E-07  | 2.18E-06  |
| Unigene19544  | Potri.012G000800.1 | 58.0479  | 19.1114 | 1.6028 | Up | 6.39E-56  | 7.04E-55  |
| Unigene363    | Potri.017G135000.1 | 9.4816   | 3.1236  | 1.6019 | Up | 1.69E-28  | 9.80E-28  |
| Unigene46218  | Potri.019G084900.1 | 7.966    | 2.6252  | 1.6014 | Up | 9.83E-08  | 2.44E-07  |
| Unigene9850   | Potri.001G118700.4 | 105.1807 | 34.6759 | 1.6009 | Up | 3.91E-79  | 6.34E-78  |
| Unigene4469   | Potri.001G239300.1 | 12.9165  | 4.2599  | 1.6003 | Up | 1.03E-08  | 2.74E-08  |
| Unigene114734 | Potri.003G143600.1 | 211.3189 | 69.7031 | 1.6001 | Up | 1.45E-116 | 3.77E-115 |
| Unigene11236  | Potri.005G020000.2 | 19.0182  | 6.2754  | 1.5996 | Up | 1.13E-41  | 9.20E-41  |

|               |                    |          |         |        |    |          |          |
|---------------|--------------------|----------|---------|--------|----|----------|----------|
| Unigene106175 | Potri.007G106500.1 | 36.2518  | 11.9653 | 1.5992 | Up | 3.55E-27 | 1.99E-26 |
| Unigene20297  | Potri.015G096900.1 | 3.8737   | 1.2789  | 1.5988 | Up | 5.76E-06 | 1.24E-05 |
| Unigene19161  | Potri.011G098800.3 | 26.8051  | 8.8544  | 1.598  | Up | 3.22E-17 | 1.29E-16 |
| Unigene28327  | Potri.003G164600.1 | 144.5507 | 47.7601 | 1.5977 | Up | 5.74E-91 | 1.09E-89 |
| Unigene49672  | Potri.007G072600.1 | 50.295   | 16.626  | 1.597  | Up | 6.24E-61 | 7.53E-60 |
| Unigene92976  | Potri.013G045000.1 | 13.4792  | 4.4565  | 1.5968 | Up | 1.72E-15 | 6.39E-15 |
| Unigene25217  | Potri.001G079800.1 | 36.5435  | 12.0827 | 1.5967 | Up | 5.60E-23 | 2.75E-22 |
| Unigene36542  | Potri.003G147700.1 | 9.8505   | 3.2576  | 1.5964 | Up | 2.38E-32 | 1.54E-31 |
| Unigene52128  | Potri.001G249800.2 | 25.4584  | 8.4198  | 1.5963 | Up | 2.04E-17 | 8.24E-17 |
| Unigene1191   | Potri.006G245300.1 | 5.9295   | 1.9629  | 1.5949 | Up | 1.00E-14 | 3.61E-14 |
| Unigene114773 | Potri.012G053700.3 | 34.7318  | 11.5023 | 1.5943 | Up | 1.70E-20 | 7.70E-20 |
| Unigene21130  | Potri.006G200900.3 | 26.676   | 8.8365  | 1.594  | Up | 8.00E-52 | 8.12E-51 |
| Unigene47644  | Potri.008G114000.2 | 82.3335  | 27.2829 | 1.5935 | Up | 4.11E-50 | 4.02E-49 |
| Unigene65130  | Potri.015G093200.3 | 5.2563   | 1.7424  | 1.593  | Up | 3.55E-05 | 7.11E-05 |
| Unigene37684  | Potri.011G129500.2 | 7.1308   | 2.3638  | 1.593  | Up | 3.59E-04 | 6.50E-04 |
| Unigene91541  | Potri.008G100600.1 | 3.4228   | 1.1346  | 1.593  | Up | 3.59E-04 | 6.50E-04 |
| Unigene25503  | Potri.008G045400.4 | 5.8846   | 1.9507  | 1.593  | Up | 3.60E-06 | 7.93E-06 |
| Unigene36354  | Potri.008G008000.1 | 5.0774   | 1.6831  | 1.593  | Up | 3.55E-05 | 7.11E-05 |
| Unigene66133  | Potri.001G154300.3 | 4.024    | 1.3339  | 1.593  | Up | 3.55E-05 | 7.11E-05 |
| Unigene106412 | Potri.T107400.1    | 7.6562   | 2.538   | 1.5929 | Up | 3.72E-07 | 8.84E-07 |
| Unigene80108  | Potri.011G137300.1 | 5.9133   | 1.9603  | 1.5929 | Up | 3.59E-04 | 6.50E-04 |
| Unigene92068  | Potri.007G050700.1 | 3.2112   | 1.0645  | 1.5929 | Up | 3.59E-04 | 6.50E-04 |
| Unigene20094  | Potri.001G254800.1 | 5.479    | 1.8163  | 1.5929 | Up | 3.55E-05 | 7.11E-05 |
| Unigene14091  | Potri.014G093100.1 | 7.2441   | 2.4078  | 1.5891 | Up | 2.44E-08 | 6.31E-08 |
| Unigene94484  | Potri.001G253600.1 | 6.1225   | 2.0366  | 1.588  | Up | 1.92E-17 | 7.74E-17 |
| Unigene7183   | Potri.005G154300.1 | 6.3409   | 2.1097  | 1.5876 | Up | 2.25E-06 | 5.03E-06 |
| Unigene1426   | Potri.002G004900.1 | 13.1616  | 4.3799  | 1.5874 | Up | 1.60E-20 | 7.23E-20 |
| Unigene80672  | Potri.010G026200.2 | 18.3514  | 6.1082  | 1.5871 | Up | 1.74E-10 | 5.09E-10 |
| Unigene42871  | Potri.003G170300.1 | 10.1774  | 3.3891  | 1.5864 | Up | 9.85E-30 | 5.93E-29 |
| Unigene51176  | Potri.001G170300.2 | 5.4272   | 1.8073  | 1.5864 | Up | 2.21E-05 | 4.52E-05 |
| Unigene5667   | Potri.009G048000.3 | 6.6948   | 2.2325  | 1.5844 | Up | 2.22E-04 | 4.10E-04 |
| Unigene30070  | Potri.005G094300.3 | 10.0745  | 3.3595  | 1.5844 | Up | 1.46E-07 | 3.59E-07 |
| Unigene56018  | Potri.013G158600.1 | 5.8673   | 1.9566  | 1.5843 | Up | 2.22E-04 | 4.10E-04 |
| Unigene57739  | Potri.013G023100.5 | 6.8965   | 2.3023  | 1.5828 | Up | 1.41E-06 | 3.20E-06 |
| Unigene2627   | Potri.006G230800.2 | 28.6512  | 9.5709  | 1.5819 | Up | 4.88E-37 | 3.57E-36 |
| Unigene12029  | Potri.006G021700.1 | 9.1843   | 3.0694  | 1.5812 | Up | 2.15E-19 | 9.36E-19 |
| Unigene31668  | Potri.010G109900.3 | 11.4033  | 3.8128  | 1.5805 | Up | 2.60E-16 | 1.00E-15 |
| Unigene70071  | Potri.006G231700.1 | 5.5471   | 1.8547  | 1.5805 | Up | 4.69E-12 | 1.49E-11 |
| Unigene28263  | Potri.006G093000.1 | 65.7317  | 21.9881 | 1.5799 | Up | 1.60E-35 | 1.13E-34 |

|               |                     |          |         |        |    |           |           |
|---------------|---------------------|----------|---------|--------|----|-----------|-----------|
| Unigene115878 | Potri.014G141500.2  | 147.2155 | 49.2636 | 1.5793 | Up | 1.11E-87  | 2.01E-86  |
| Unigene53739  | Potri.014G143800.2  | 58.4312  | 19.5578 | 1.579  | Up | 1.67E-31  | 1.06E-30  |
| Unigene12112  | Potri.008G002900.11 | 7.9831   | 2.6725  | 1.5788 | Up | 2.19E-14  | 7.77E-14  |
| Unigene35676  | Potri.018G057100.1  | 5.7146   | 1.9136  | 1.5784 | Up | 8.82E-07  | 2.04E-06  |
| Unigene35611  | Potri.004G177100.3  | 7.2509   | 2.428   | 1.5784 | Up | 1.14E-17  | 4.64E-17  |
| Unigene48928  | Potri.006G100300.4  | 21.1109  | 7.0707  | 1.5781 | Up | 1.51E-15  | 5.63E-15  |
| Unigene25467  | Potri.018G103300.1  | 3.9494   | 1.3237  | 1.5771 | Up | 1.38E-04  | 2.60E-04  |
| Unigene34985  | Potri.005G020300.1  | 50.6254  | 16.9671 | 1.5771 | Up | 4.47E-59  | 5.23E-58  |
| Unigene66279  | Potri.010G255600.5  | 3.9125   | 1.3114  | 1.577  | Up | 1.38E-04  | 2.60E-04  |
| Unigene65712  | Potri.008G029400.2  | 6.7409   | 2.2594  | 1.577  | Up | 1.38E-04  | 2.60E-04  |
| Unigene14658  | Potri.001G164700.3  | 84.3236  | 28.2732 | 1.5765 | Up | 2.03E-47  | 1.88E-46  |
| Unigene51752  | Potri.015G069400.1  | 23.9578  | 8.037   | 1.5758 | Up | 1.28E-13  | 4.39E-13  |
| Unigene114905 | Potri.006G105100.1  | 162.8836 | 54.6403 | 1.5758 | Up | 2.81E-89  | 5.22E-88  |
| Unigene99380  | Potri.014G171900.1  | 6.7117   | 2.2523  | 1.5753 | Up | 8.58E-06  | 1.82E-05  |
| Unigene115323 | Potri.001G087900.1  | 7.9278   | 2.6603  | 1.5753 | Up | 8.58E-06  | 1.82E-05  |
| Unigene42997  | Potri.005G095300.8  | 8.5453   | 2.8704  | 1.5739 | Up | 7.00E-33  | 4.60E-32  |
| Unigene21295  | Potri.010G073300.2  | 20.575   | 6.914   | 1.5733 | Up | 7.32E-78  | 1.16E-76  |
| Unigene3718   | Potri.003G129500.1  | 5.9614   | 2.0034  | 1.5732 | Up | 2.41E-09  | 6.63E-09  |
| Unigene26023  | Potri.018G024300.4  | 68.2072  | 22.9256 | 1.573  | Up | 6.03E-123 | 1.67E-121 |
| Unigene44453  | Potri.010G000700.1  | 56.383   | 18.9657 | 1.5719 | Up | 3.89E-81  | 6.47E-80  |
| Unigene4675   | Potri.019G083900.1  | 19.4606  | 6.5519  | 1.5706 | Up | 6.93E-12  | 2.19E-11  |
| Unigene91350  | Potri.017G092600.1  | 4.2935   | 1.4455  | 1.5706 | Up | 8.53E-05  | 1.65E-04  |
| Unigene70008  | Potri.014G140000.1  | 3.5822   | 1.206   | 1.5706 | Up | 3.46E-07  | 8.25E-07  |
| Unigene17527  | Potri.005G120600.1  | 4.2689   | 1.4372  | 1.5706 | Up | 3.46E-07  | 8.25E-07  |
| Unigene91523  | Potri.005G093000.1  | 4.2127   | 1.4183  | 1.5706 | Up | 8.53E-05  | 1.65E-04  |
| Unigene115815 | Potri.005G032200.1  | 15.9145  | 5.358   | 1.5706 | Up | 1.02E-10  | 3.04E-10  |
| Unigene9766   | Potri.001G258900.2  | 8.4055   | 2.8299  | 1.5706 | Up | 5.36E-06  | 1.16E-05  |
| Unigene37722  | Potri.001G146500.3  | 4.4872   | 1.5107  | 1.5706 | Up | 8.53E-05  | 1.65E-04  |
| Unigene20086  | Potri.018G103300.1  | 8.4953   | 2.8602  | 1.5705 | Up | 5.36E-06  | 1.16E-05  |
| Unigene46066  | Potri.004G189900.1  | 50.3473  | 16.9603 | 1.5698 | Up | 3.81E-27  | 2.13E-26  |
| Unigene18760  | Potri.002G248400.1  | 78.4113  | 26.4143 | 1.5697 | Up | 5.74E-77  | 9.01E-76  |
| Unigene21806  | Potri.010G186600.1  | 30.6347  | 10.3297 | 1.5684 | Up | 8.43E-77  | 1.32E-75  |
| Unigene4915   | Potri.005G102100.1  | 5.4993   | 1.8547  | 1.5681 | Up | 9.57E-10  | 2.69E-09  |
| Unigene76890  | Potri.004G010500.2  | 16.1959  | 5.4638  | 1.5677 | Up | 1.43E-08  | 3.75E-08  |
| Unigene7173   | Potri.001G343100.1  | 6.4332   | 2.1703  | 1.5676 | Up | 1.43E-08  | 3.76E-08  |
| Unigene5221   | Potri.009G122600.1  | 5.1598   | 1.7414  | 1.5671 | Up | 2.17E-07  | 5.25E-07  |
| Unigene15274  | Potri.002G105600.1  | 9.797    | 3.3064  | 1.5671 | Up | 2.17E-07  | 5.25E-07  |
| Unigene94435  | Potri.003G154600.1  | 5.1614   | 1.7423  | 1.5668 | Up | 2.77E-12  | 8.90E-12  |
| Unigene46089  | Potri.008G067400.7  | 6.0219   | 2.0335  | 1.5663 | Up | 3.35E-06  | 7.39E-06  |

|               |                    |         |         |        |    |          |          |
|---------------|--------------------|---------|---------|--------|----|----------|----------|
| Unigene28275  | Potri.006G262300.1 | 32.6371 | 11.0209 | 1.5663 | Up | 3.04E-35 | 2.12E-34 |
| Unigene47812  | Potri.001G110300.1 | 5.4804  | 1.8506  | 1.5663 | Up | 3.35E-06 | 7.39E-06 |
| Unigene217    | Potri.012G002500.1 | 11.59   | 3.9145  | 1.566  | Up | 9.65E-38 | 7.17E-37 |
| Unigene2105   | Potri.004G049600.1 | 50.1039 | 16.9271 | 1.5656 | Up | 1.30E-59 | 1.54E-58 |
| Unigene88622  | Potri.013G158100.2 | 5.6447  | 1.9079  | 1.5649 | Up | 5.30E-05 | 1.05E-04 |
| Unigene90381  | Potri.011G110600.1 | 18.405  | 6.2229  | 1.5644 | Up | 5.19E-15 | 1.89E-14 |
| Unigene90732  | Potri.018G132700.1 | 8.1831  | 2.7679  | 1.5639 | Up | 1.36E-07 | 3.35E-07 |
| Unigene106393 | Potri.012G035400.4 | 8.7884  | 2.9726  | 1.5639 | Up | 1.36E-07 | 3.35E-07 |
| Unigene14705  | Potri.002G146100.1 | 24.9098 | 8.4305  | 1.563  | Up | 3.29E-15 | 1.21E-14 |
| Unigene34660  | Potri.008G199000.1 | 8.6832  | 2.9418  | 1.5615 | Up | 2.64E-24 | 1.35E-23 |
| Unigene569    | Potri.013G008900.1 | 37.5115 | 12.7101 | 1.5614 | Up | 1.64E-39 | 1.27E-38 |
| Unigene60795  | Potri.005G021200.1 | 4.4679  | 1.5144  | 1.5609 | Up | 8.55E-08 | 2.13E-07 |
| Unigene29414  | Potri.014G149000.1 | 31.7938 | 10.7773 | 1.5607 | Up | 7.33E-31 | 4.56E-30 |
| Unigene30883  | Potri.011G010300.7 | 54.988  | 18.6426 | 1.5605 | Up | 2.11E-42 | 1.75E-41 |
| Unigene33910  | Potri.T043900.2    | 6.2487  | 2.1194  | 1.5599 | Up | 4.41E-13 | 1.48E-12 |
| Unigene81422  | Potri.016G054700.2 | 7.9298  | 2.6896  | 1.5599 | Up | 3.29E-05 | 6.63E-05 |
| Unigene89925  | Potri.011G140100.5 | 5.4733  | 1.8564  | 1.5599 | Up | 3.29E-05 | 6.63E-05 |
| Unigene36130  | Potri.001G289600.1 | 15.1034 | 5.1243  | 1.5594 | Up | 1.91E-14 | 6.80E-14 |
| Unigene110160 | Potri.001G011800.1 | 67.5105 | 22.911  | 1.5591 | Up | 4.20E-30 | 2.56E-29 |
| Unigene44093  | Potri.010G128700.1 | 12.5867 | 4.276   | 1.5576 | Up | 1.97E-42 | 1.63E-41 |
| Unigene23194  | Potri.013G051500.2 | 8.0621  | 2.7391  | 1.5575 | Up | 1.01E-18 | 4.31E-18 |
| Unigene10789  | Potri.006G036000.1 | 13.3852 | 4.5539  | 1.5555 | Up | 1.71E-51 | 1.73E-50 |
| Unigene50796  | Potri.003G176500.1 | 6.9189  | 2.3539  | 1.5555 | Up | 6.01E-11 | 1.81E-10 |
| Unigene5639   | Potri.003G134900.1 | 10.8197 | 3.6811  | 1.5555 | Up | 8.19E-07 | 1.90E-06 |
| Unigene87841  | Potri.003G062200.1 | 4.3882  | 1.4929  | 1.5555 | Up | 5.39E-04 | 9.52E-04 |
| Unigene12646  | Potri.001G273600.3 | 3.817   | 1.2986  | 1.5555 | Up | 2.05E-05 | 4.20E-05 |
| Unigene38541  | Potri.001G043500.1 | 3.3508  | 1.14    | 1.5555 | Up | 8.19E-07 | 1.90E-06 |
| Unigene93416  | Potri.008G201500.4 | 3.704   | 1.2602  | 1.5554 | Up | 2.05E-05 | 4.20E-05 |
| Unigene46737  | Potri.005G215400.2 | 4.3612  | 1.4838  | 1.5554 | Up | 5.39E-04 | 9.52E-04 |
| Unigene24604  | Potri.007G144600.3 | 22.8525 | 7.7823  | 1.5541 | Up | 7.04E-14 | 2.44E-13 |
| Unigene9977   | Potri.002G034700.1 | 11.0942 | 3.7781  | 1.5541 | Up | 7.04E-14 | 2.44E-13 |
| Unigene65641  | Potri.001G275200.4 | 7.0833  | 2.415   | 1.5524 | Up | 5.13E-07 | 1.21E-06 |
| Unigene35161  | Potri.006G233200.1 | 35.5149 | 12.1132 | 1.5518 | Up | 1.23E-15 | 4.59E-15 |
| Unigene28747  | Potri.009G049600.1 | 6.2806  | 2.1427  | 1.5515 | Up | 2.81E-14 | 9.93E-14 |
| Unigene11164  | Potri.010G033600.1 | 6.5152  | 2.2228  | 1.5514 | Up | 1.49E-18 | 6.29E-18 |
| Unigene62907  | Potri.006G280200.3 | 4.4939  | 1.5332  | 1.5514 | Up | 1.28E-05 | 2.68E-05 |
| Unigene90718  | Potri.001G351400.1 | 3.9112  | 1.3361  | 1.5496 | Up | 3.32E-04 | 6.01E-04 |
| Unigene53499  | Potri.009G082200.4 | 23.1514 | 7.9183  | 1.5478 | Up | 2.23E-10 | 6.49E-10 |
| Unigene31272  | Potri.006G066300.1 | 4.6624  | 1.5947  | 1.5478 | Up | 7.96E-06 | 1.70E-05 |

|               |                    |         |         |        |    |           |           |
|---------------|--------------------|---------|---------|--------|----|-----------|-----------|
| Unigene93992  | Potri.001G256200.1 | 3.3284  | 1.1384  | 1.5478 | Up | 7.96E-06  | 1.70E-05  |
| Unigene45544  | Potri.003G046100.1 | 72.3623 | 24.7558 | 1.5475 | Up | 1.62E-176 | 7.18E-175 |
| Unigene99744  | Potri.011G019000.1 | 11.7861 | 4.0335  | 1.547  | Up | 2.02E-07  | 4.89E-07  |
| Unigene92946  | Potri.018G081000.3 | 7.6899  | 2.6326  | 1.5465 | Up | 5.27E-09  | 1.42E-08  |
| Unigene21583  | Potri.011G131100.1 | 19.9566 | 6.8344  | 1.546  | Up | 3.72E-53  | 3.88E-52  |
| Unigene4058   | Potri.014G043300.2 | 14.7588 | 5.0593  | 1.5446 | Up | 3.31E-09  | 9.02E-09  |
| Unigene43587  | Potri.004G166600.2 | 16.6738 | 5.7157  | 1.5446 | Up | 3.06E-23  | 1.51E-22  |
| Unigene5705   | Potri.017G138200.1 | 4.4964  | 1.5414  | 1.5445 | Up | 2.05E-04  | 3.79E-04  |
| Unigene65014  | Potri.017G035400.1 | 4.2963  | 1.4728  | 1.5445 | Up | 4.96E-06  | 1.08E-05  |
| Unigene68455  | Potri.006G155700.2 | 4.9582  | 1.6997  | 1.5445 | Up | 2.05E-04  | 3.79E-04  |
| Unigene27534  | Potri.006G161700.1 | 10.1521 | 3.4838  | 1.543  | Up | 5.58E-11  | 1.68E-10  |
| Unigene116575 | Potri.012G007500.1 | 52.0352 | 17.8601 | 1.5427 | Up | 2.56E-33  | 1.70E-32  |
| Unigene45010  | Potri.019G078700.1 | 14.6135 | 5.0176  | 1.5422 | Up | 4.37E-51  | 4.36E-50  |
| Unigene6260   | Potri.001G148800.1 | 7.0127  | 2.4089  | 1.5416 | Up | 3.10E-06  | 6.86E-06  |
| Unigene35062  | Potri.009G121000.6 | 10.7899 | 3.7079  | 1.541  | Up | 8.02E-18  | 3.29E-17  |
| Unigene8162   | Potri.006G262300.1 | 18.1738 | 6.2469  | 1.5406 | Up | 2.89E-16  | 1.11E-15  |
| Unigene2609   | Potri.012G070700.1 | 36.3496 | 12.4973 | 1.5403 | Up | 1.84E-52  | 1.89E-51  |
| Unigene16736  | Potri.013G062200.1 | 4.0675  | 1.3986  | 1.5402 | Up | 1.27E-04  | 2.41E-04  |
| Unigene92178  | Potri.008G027400.2 | 3.811   | 1.3104  | 1.5402 | Up | 1.27E-04  | 2.41E-04  |
| Unigene33900  | Potri.002G138400.2 | 4.6255  | 1.5904  | 1.5402 | Up | 1.27E-04  | 2.41E-04  |
| Unigene9285   | Potri.001G271100.1 | 4.9383  | 1.698   | 1.5402 | Up | 1.27E-04  | 2.41E-04  |
| Unigene35473  | Potri.001G235400.4 | 5.6369  | 1.9382  | 1.5402 | Up | 1.27E-04  | 2.41E-04  |
| Unigene26541  | Potri.011G043100.1 | 3.4509  | 1.1866  | 1.5401 | Up | 1.27E-04  | 2.41E-04  |
| Unigene94606  | Potri.019G098700.1 | 66.3435 | 22.8252 | 1.5393 | Up | 3.14E-48  | 2.96E-47  |
| Unigene50505  | Potri.008G203600.5 | 3.2124  | 1.1056  | 1.5388 | Up | 1.94E-06  | 4.36E-06  |
| Unigene10769  | Potri.002G005500.1 | 19.4762 | 6.7074  | 1.5379 | Up | 5.95E-51  | 5.93E-50  |
| Unigene1183   | Potri.010G190600.3 | 7.0224  | 2.4186  | 1.5378 | Up | 5.21E-10  | 1.49E-09  |
| Unigene18527  | Potri.002G247500.1 | 22.6807 | 7.817   | 1.5368 | Up | 4.79E-31  | 2.99E-30  |
| Unigene117335 | Potri.006G146200.1 | 59.9307 | 20.657  | 1.5367 | Up | 1.69E-41  | 1.37E-40  |
| Unigene8509   | Potri.019G087200.2 | 7.5201  | 2.5926  | 1.5364 | Up | 5.58E-12  | 1.77E-11  |
| Unigene26392  | Potri.006G128600.1 | 22.2021 | 7.6543  | 1.5364 | Up | 3.28E-10  | 9.47E-10  |
| Unigene18193  | Potri.013G102000.1 | 13.8146 | 4.7627  | 1.5363 | Up | 1.67E-15  | 6.23E-15  |
| Unigene91616  | Potri.011G168300.1 | 4.3372  | 1.4953  | 1.5363 | Up | 7.87E-05  | 1.52E-04  |
| Unigene63672  | Potri.007G016000.1 | 4.6392  | 1.5994  | 1.5363 | Up | 3.28E-10  | 9.47E-10  |
| Unigene88018  | Potri.004G229200.5 | 5.7208  | 1.9723  | 1.5363 | Up | 7.87E-05  | 1.52E-04  |
| Unigene66536  | Potri.002G147300.2 | 5.3797  | 1.8547  | 1.5363 | Up | 1.21E-06  | 2.77E-06  |
| Unigene2506   | Potri.013G013100.4 | 28.106  | 9.6926  | 1.5359 | Up | 3.25E-61  | 3.94E-60  |
| Unigene40410  | Potri.005G251300.4 | 22.1034 | 7.6277  | 1.5349 | Up | 2.07E-10  | 6.04E-10  |
| Unigene27952  | Potri.001G112600.1 | 6.5972  | 2.2781  | 1.534  | Up | 7.58E-07  | 1.76E-06  |

|              |                    |          |         |        |    |           |           |
|--------------|--------------------|----------|---------|--------|----|-----------|-----------|
| Unigene23461 | Potri.001G047800.1 | 5.1816   | 1.7898  | 1.5336 | Up | 1.30E-10  | 3.85E-10  |
| Unigene3107  | Potri.013G033000.2 | 49.191   | 16.9965 | 1.5332 | Up | 1.02E-87  | 1.87E-86  |
| Unigene52784 | Potri.010G148500.1 | 4.1839   | 1.4458  | 1.533  | Up | 7.76E-09  | 2.07E-08  |
| Unigene30000 | Potri.008G063600.2 | 23.5342  | 8.1327  | 1.533  | Up | 2.68E-16  | 1.03E-15  |
| Unigene14941 | Potri.007G042400.1 | 4.6735   | 1.615   | 1.533  | Up | 4.89E-05  | 9.68E-05  |
| Unigene14850 | Potri.006G120000.1 | 5.3866   | 1.8614  | 1.533  | Up | 4.89E-05  | 9.68E-05  |
| Unigene53044 | Potri.002G160800.1 | 19.193   | 6.6325  | 1.533  | Up | 7.76E-09  | 2.07E-08  |
| Unigene13003 | Potri.001G182000.1 | 9.8921   | 3.4221  | 1.5314 | Up | 4.88E-09  | 1.32E-08  |
| Unigene97962 | Potri.T027200.1    | 23.4902  | 8.1291  | 1.5309 | Up | 5.60E-13  | 1.86E-12  |
| Unigene32372 | Potri.002G089900.1 | 9.6026   | 3.3244  | 1.5303 | Up | 1.41E-28  | 8.22E-28  |
| Unigene65107 | Potri.018G075000.2 | 4.1199   | 1.4267  | 1.5299 | Up | 3.04E-05  | 6.13E-05  |
| Unigene26088 | Potri.008G060600.3 | 4.2112   | 1.4583  | 1.5299 | Up | 2.97E-07  | 7.13E-07  |
| Unigene50337 | Potri.005G216400.1 | 79.0343  | 27.3776 | 1.5295 | Up | 1.02E-151 | 3.72E-150 |
| Unigene69681 | Potri.015G129900.1 | 8.2434   | 2.8578  | 1.5283 | Up | 1.55E-15  | 5.78E-15  |
| Unigene94413 | Potri.005G053400.3 | 22.2279  | 7.71    | 1.5276 | Up | 4.02E-44  | 3.46E-43  |
| Unigene63800 | Potri.017G009600.1 | 7.8595   | 2.7269  | 1.5272 | Up | 1.89E-05  | 3.89E-05  |
| Unigene38416 | Potri.015G104000.1 | 9.1619   | 3.1793  | 1.5269 | Up | 4.90E-20  | 2.18E-19  |
| Unigene21403 | Potri.002G102600.1 | 73.6298  | 25.5654 | 1.5261 | Up | 1.44E-283 | 1.18E-281 |
| Unigene27643 | Potri.015G105300.1 | 4.4553   | 1.5471  | 1.526  | Up | 7.65E-10  | 2.16E-09  |
| Unigene27610 | Potri.015G132600.1 | 8.696    | 3.0197  | 1.5259 | Up | 7.65E-10  | 2.16E-09  |
| Unigene12836 | Potri.006G022100.1 | 41.7925  | 14.5215 | 1.5251 | Up | 1.29E-35  | 9.11E-35  |
| Unigene15319 | Potri.006G034600.1 | 26.6323  | 9.2557  | 1.5248 | Up | 6.99E-53  | 7.24E-52  |
| Unigene50    | Potri.014G141400.1 | 135.5413 | 47.1238 | 1.5242 | Up | 0         | 0         |
| Unigene12505 | Potri.010G190400.1 | 7.8109   | 2.7163  | 1.5238 | Up | 2.27E-23  | 1.13E-22  |
| Unigene6229  | Potri.002G211400.1 | 24.6556  | 8.5819  | 1.5225 | Up | 5.68E-15  | 2.07E-14  |
| Unigene26195 | Potri.016G028900.1 | 186.4977 | 64.9298 | 1.5222 | Up | 2.46E-71  | 3.53E-70  |
| Unigene11056 | Potri.009G105800.1 | 10.5672  | 3.6799  | 1.5219 | Up | 8.14E-63  | 1.02E-61  |
| Unigene13232 | Potri.012G007500.1 | 102.2559 | 35.6187 | 1.5215 | Up | 7.31E-68  | 9.93E-67  |
| Unigene8188  | Potri.001G171100.1 | 4.358    | 1.519   | 1.5205 | Up | 4.58E-06  | 9.96E-06  |
| Unigene65715 | Potri.002G170900.1 | 8.2626   | 2.8825  | 1.5193 | Up | 1.14E-08  | 3.00E-08  |
| Unigene6829  | Potri.002G131900.1 | 5.872    | 2.0494  | 1.5187 | Up | 2.86E-06  | 6.34E-06  |
| Unigene41386 | Potri.010G122200.3 | 11.6091  | 4.0533  | 1.5181 | Up | 3.29E-31  | 2.07E-30  |
| Unigene93539 | Potri.006G191600.1 | 4.6312   | 1.6182  | 1.517  | Up | 1.79E-06  | 4.04E-06  |
| Unigene30158 | Potri.016G001100.1 | 4.7316   | 1.6551  | 1.5154 | Up | 1.12E-06  | 2.56E-06  |
| Unigene35941 | Potri.008G157400.2 | 8.1593   | 2.8541  | 1.5154 | Up | 1.12E-06  | 2.56E-06  |
| Unigene35629 | Potri.014G174700.1 | 19.2001  | 6.7195  | 1.5147 | Up | 3.01E-12  | 9.68E-12  |
| Unigene32302 | Potri.004G188700.1 | 13.8128  | 4.8351  | 1.5144 | Up | 1.69E-20  | 7.63E-20  |
| Unigene87047 | Potri.001G394400.3 | 4.8128   | 1.6852  | 1.514  | Up | 4.94E-04  | 8.75E-04  |
| Unigene92654 | Potri.018G070700.1 | 3.0263   | 1.0597  | 1.5139 | Up | 4.94E-04  | 8.75E-04  |



|               |                    |          |         |        |    |          |          |
|---------------|--------------------|----------|---------|--------|----|----------|----------|
| Unigene27603  | Potri.014G130000.1 | 17.9992  | 6.3081  | 1.5127 | Up | 1.50E-18 | 6.33E-18 |
| Unigene92073  | Potri.017G069200.1 | 6.8191   | 2.3899  | 1.5126 | Up | 4.38E-07 | 1.04E-06 |
| Unigene69098  | Potri.015G074500.1 | 9.1865   | 3.2196  | 1.5126 | Up | 4.38E-07 | 1.04E-06 |
| Unigene19622  | Potri.006G050000.1 | 5.9081   | 2.0706  | 1.5126 | Up | 4.38E-07 | 1.04E-06 |
| Unigene7656   | Potri.014G108200.2 | 19.1078  | 6.6975  | 1.5125 | Up | 1.72E-21 | 8.05E-21 |
| Unigene60857  | Potri.002G099200.1 | 3.0785   | 1.0798  | 1.5115 | Up | 3.05E-04 | 5.54E-04 |
| Unigene107111 | Potri.014G151200.2 | 27.1844  | 9.5355  | 1.5114 | Up | 7.00E-31 | 4.36E-30 |
| Unigene17935  | Potri.012G135600.1 | 3.6452   | 1.2786  | 1.5114 | Up | 3.05E-04 | 5.54E-04 |
| Unigene99216  | Potri.010G006300.1 | 28.1383  | 9.8701  | 1.5114 | Up | 3.02E-13 | 1.02E-12 |
| Unigene101204 | Potri.009G141600.1 | 8.5338   | 2.9958  | 1.5102 | Up | 1.72E-07 | 4.19E-07 |
| Unigene46000  | Potri.001G104400.2 | 45.6834  | 16.0372 | 1.5102 | Up | 6.45E-38 | 4.81E-37 |
| Unigene38201  | Potri.006G052000.1 | 10.084   | 3.5413  | 1.5097 | Up | 3.31E-26 | 1.80E-25 |
| Unigene35879  | Potri.009G128800.1 | 4.6441   | 1.6327  | 1.5081 | Up | 6.76E-08 | 1.70E-07 |
| Unigene19661  | Potri.004G219300.3 | 6.0519   | 2.129   | 1.5072 | Up | 1.17E-04 | 2.22E-04 |
| Unigene15533  | Potri.004G181900.2 | 12.0639  | 4.244   | 1.5072 | Up | 4.24E-08 | 1.08E-07 |
| Unigene9085   | Potri.014G056700.5 | 17.8     | 6.2639  | 1.5067 | Up | 4.85E-15 | 1.77E-14 |
| Unigene16668  | Potri.009G061800.1 | 71.2244  | 25.0679 | 1.5065 | Up | 8.91E-29 | 5.23E-28 |
| Unigene34576  | Potri.005G083800.5 | 18.0944  | 6.3694  | 1.5063 | Up | 8.15E-36 | 5.78E-35 |
| Unigene32194  | Potri.013G013100.2 | 49.9666  | 17.5941 | 1.5059 | Up | 3.06E-88 | 5.59E-87 |
| Unigene44086  | Potri.013G089400.1 | 4.2837   | 1.5084  | 1.5058 | Up | 1.94E-15 | 7.21E-15 |
| Unigene9527   | Potri.002G245500.2 | 8.9795   | 3.1627  | 1.5055 | Up | 7.23E-05 | 1.41E-04 |
| Unigene44728  | Potri.002G052700.2 | 4.3586   | 1.5352  | 1.5054 | Up | 1.67E-08 | 4.37E-08 |
| Unigene18132  | Potri.003G210600.1 | 11.276   | 3.9721  | 1.5053 | Up | 5.81E-30 | 3.52E-29 |
| Unigene109376 | Potri.013G112900.4 | 82.6168  | 29.1061 | 1.5051 | Up | 1.12E-33 | 7.47E-33 |
| Unigene53879  | Potri.013G029500.1 | 112.1916 | 39.554  | 1.5041 | Up | 3.87E-79 | 6.27E-78 |
| Unigene31338  | Potri.006G058400.1 | 5.981    | 2.1088  | 1.504  | Up | 4.49E-05 | 8.92E-05 |
| Unigene68742  | Potri.002G074400.1 | 5.7788   | 2.0376  | 1.5039 | Up | 4.49E-05 | 8.92E-05 |
| Unigene3114   | Potri.016G054700.2 | 10.657   | 3.7612  | 1.5025 | Up | 2.61E-09 | 7.17E-09 |
| Unigene93164  | Potri.010G065100.1 | 3.9988   | 1.4113  | 1.5025 | Up | 2.79E-05 | 5.66E-05 |
| Unigene118181 | Potri.017G056800.1 | 68.4726  | 24.1694 | 1.5023 | Up | 7.42E-53 | 7.68E-52 |
| Unigene1377   | Potri.005G072500.1 | 47.4504  | 16.7653 | 1.5009 | Up | 2.68E-68 | 3.66E-67 |
| Unigene18676  | Potri.014G141400.1 | 23.741   | 8.389   | 1.5008 | Up | 5.53E-31 | 3.45E-30 |
| Unigene39428  | Potri.006G074900.1 | 10.4647  | 3.6989  | 1.5004 | Up | 2.90E-27 | 1.63E-26 |
| Unigene36038  | Potri.003G207900.1 | 7.0795   | 2.5045  | 1.4991 | Up | 6.74E-06 | 1.45E-05 |
| Unigene11566  | Potri.012G035400.4 | 7.6361   | 2.7017  | 1.499  | Up | 2.48E-24 | 1.27E-23 |
| Unigene44092  | Potri.002G182500.1 | 51.7032  | 18.2986 | 1.4985 | Up | 2.42E-43 | 2.05E-42 |
| Unigene65649  | Potri.014G006700.1 | 8.0511   | 2.8509  | 1.4978 | Up | 8.41E-21 | 3.84E-20 |
| Unigene3710   | Potri.T043900.1    | 7.9153   | 2.8036  | 1.4974 | Up | 2.63E-06 | 5.84E-06 |
| Unigene37331  | Potri.018G063000.1 | 46.7445  | 16.557  | 1.4974 | Up | 8.16E-41 | 6.53E-40 |

|               |                    |          |         |        |    |           |           |
|---------------|--------------------|----------|---------|--------|----|-----------|-----------|
| Unigene33414  | Potri.018G032200.1 | 23.4278  | 8.3027  | 1.4966 | Up | 5.44E-22  | 2.58E-21  |
| Unigene6409   | Potri.013G114700.1 | 5.2226   | 1.8514  | 1.4962 | Up | 6.44E-12  | 2.04E-11  |
| Unigene21055  | Potri.004G181900.1 | 39.046   | 13.8431 | 1.496  | Up | 1.38E-22  | 6.70E-22  |
| Unigene14980  | Potri.009G059200.1 | 58.8464  | 20.8729 | 1.4953 | Up | 2.23E-23  | 1.11E-22  |
| Unigene68001  | Potri.012G144100.1 | 3.9834   | 1.4143  | 1.4939 | Up | 2.52E-07  | 6.07E-07  |
| Unigene52282  | Potri.010G142600.4 | 11.2217  | 3.9842  | 1.4939 | Up | 2.57E-13  | 8.69E-13  |
| Unigene22415  | Potri.T005500.1    | 7.6463   | 2.715   | 1.4938 | Up | 2.99E-31  | 1.88E-30  |
| Unigene46379  | Potri.015G057100.4 | 11.8625  | 4.2162  | 1.4924 | Up | 6.21E-08  | 1.56E-07  |
| Unigene6549   | Potri.010G108200.5 | 9.6906   | 3.4473  | 1.4911 | Up | 1.54E-08  | 4.02E-08  |
| Unigene41633  | Potri.001G118700.2 | 11.2305  | 3.9966  | 1.4906 | Up | 2.64E-16  | 1.02E-15  |
| Unigene43872  | Potri.001G085600.1 | 22.6243  | 8.0517  | 1.4905 | Up | 8.28E-24  | 4.17E-23  |
| Unigene18311  | Potri.006G180500.1 | 58.0059  | 20.6465 | 1.4903 | Up | 3.34E-84  | 5.80E-83  |
| Unigene22474  | Potri.003G008800.2 | 5.752    | 2.0475  | 1.4902 | Up | 1.05E-16  | 4.14E-16  |
| Unigene27690  | Potri.019G078700.1 | 7.2912   | 2.5968  | 1.4894 | Up | 1.51E-09  | 4.19E-09  |
| Unigene24172  | Potri.008G145500.3 | 21.0574  | 7.5105  | 1.4873 | Up | 4.52E-21  | 2.09E-20  |
| Unigene47826  | Potri.008G190900.1 | 62.5804  | 22.3251 | 1.487  | Up | 9.61E-42  | 7.85E-41  |
| Unigene7896   | Potri.001G142100.2 | 16.7478  | 5.9766  | 1.4866 | Up | 1.18E-22  | 5.70E-22  |
| Unigene5954   | Potri.014G141500.1 | 88.134   | 31.453  | 1.4865 | Up | 6.87E-76  | 1.06E-74  |
| Unigene9718   | Potri.008G018900.1 | 7.3383   | 2.6198  | 1.486  | Up | 9.39E-13  | 3.09E-12  |
| Unigene44505  | Potri.003G013900.1 | 10.7606  | 3.8443  | 1.485  | Up | 2.38E-14  | 8.41E-14  |
| Unigene11943  | Potri.002G248900.1 | 104.0318 | 37.1896 | 1.4841 | Up | 5.13E-103 | 1.14E-101 |
| Unigene7367   | Potri.015G020500.1 | 77.0393  | 27.5413 | 1.484  | Up | 1.59E-45  | 1.41E-44  |
| Unigene37395  | Potri.006G233200.1 | 40.6267  | 14.527  | 1.4837 | Up | 6.14E-17  | 2.43E-16  |
| Unigene7972   | Potri.004G178000.2 | 35.7285  | 12.7763 | 1.4836 | Up | 2.78E-48  | 2.62E-47  |
| Unigene396    | Potri.006G219400.1 | 28.4631  | 10.1809 | 1.4832 | Up | 2.05E-84  | 3.57E-83  |
| Unigene117612 | Potri.007G072700.3 | 179.0779 | 64.0587 | 1.4831 | Up | 1.61E-119 | 4.31E-118 |
| Unigene74217  | Potri.018G003200.1 | 54.8217  | 19.6253 | 1.482  | Up | 1.71E-22  | 8.24E-22  |
| Unigene12737  | Potri.019G074800.6 | 68.1042  | 24.391  | 1.4814 | Up | 2.92E-74  | 4.37E-73  |
| Unigene43459  | Potri.001G327800.3 | 28.5724  | 10.2395 | 1.4805 | Up | 1.17E-64  | 1.51E-63  |
| Unigene38635  | Potri.006G250900.1 | 86.3063  | 30.9455 | 1.4797 | Up | 1.99E-43  | 1.69E-42  |
| Unigene31129  | Potri.017G034100.1 | 4.5673   | 1.6402  | 1.4775 | Up | 9.89E-06  | 2.09E-05  |
| Unigene24416  | Potri.016G080900.2 | 8.9519   | 3.2148  | 1.4775 | Up | 8.72E-10  | 2.46E-09  |
| Unigene37545  | Potri.014G043600.1 | 7.8525   | 2.82    | 1.4775 | Up | 2.55E-05  | 5.19E-05  |
| Unigene8625   | Potri.013G083300.1 | 7.774    | 2.7918  | 1.4775 | Up | 5.70E-08  | 1.43E-07  |
| Unigene89955  | Potri.013G062900.1 | 4.5487   | 1.6335  | 1.4775 | Up | 2.78E-04  | 5.08E-04  |
| Unigene48575  | Potri.011G145900.1 | 8.0265   | 2.8825  | 1.4775 | Up | 3.57E-08  | 9.14E-08  |
| Unigene26089  | Potri.006G110500.1 | 14.3829  | 5.1652  | 1.4775 | Up | 2.17E-11  | 6.67E-11  |
| Unigene59717  | Potri.004G013200.9 | 5.575    | 2.0021  | 1.4775 | Up | 4.50E-04  | 8.01E-04  |
| Unigene67985  | Potri.002G131400.1 | 3.8278   | 1.3746  | 1.4775 | Up | 2.31E-07  | 5.57E-07  |

|               |                    |          |         |        |    |           |           |
|---------------|--------------------|----------|---------|--------|----|-----------|-----------|
| Unigene38124  | Potri.015G132600.1 | 4.4463   | 1.5968  | 1.4774 | Up | 6.60E-05  | 1.29E-04  |
| Unigene46599  | Potri.015G052800.1 | 9.8634   | 3.5422  | 1.4774 | Up | 3.68E-07  | 8.77E-07  |
| Unigene37619  | Potri.012G002700.3 | 6.5514   | 2.3528  | 1.4774 | Up | 2.40E-06  | 5.36E-06  |
| Unigene92885  | Potri.010G107300.2 | 3.4832   | 1.2509  | 1.4774 | Up | 1.72E-04  | 3.21E-04  |
| Unigene37957  | Potri.010G056600.1 | 26       | 9.3372  | 1.4774 | Up | 3.57E-17  | 1.43E-16  |
| Unigene14599  | Potri.002G036000.3 | 5.6695   | 2.0361  | 1.4774 | Up | 4.10E-05  | 8.18E-05  |
| Unigene3510   | Potri.001G348600.1 | 21.3005  | 7.6495  | 1.4774 | Up | 2.23E-16  | 8.62E-16  |
| Unigene17933  | Potri.001G237000.3 | 3.7118   | 1.333   | 1.4774 | Up | 3.57E-08  | 9.14E-08  |
| Unigene76157  | Potri.001G123500.4 | 13.4878  | 4.8438  | 1.4774 | Up | 9.40E-07  | 2.17E-06  |
| Unigene12507  | Potri.014G120800.1 | 91.5159  | 32.895  | 1.4762 | Up | 2.09E-74  | 3.15E-73  |
| Unigene36870  | Potri.010G111600.1 | 91.8353  | 33.0128 | 1.476  | Up | 1.02E-67  | 1.38E-66  |
| Unigene22342  | Potri.003G079900.2 | 17.1527  | 6.1752  | 1.4739 | Up | 6.55E-28  | 3.74E-27  |
| Unigene12678  | Potri.013G013100.2 | 119.02   | 42.8894 | 1.4725 | Up | 9.34E-135 | 2.91E-133 |
| Unigene35626  | Potri.001G072600.1 | 26.554   | 9.5732  | 1.4719 | Up | 2.11E-18  | 8.84E-18  |
| Unigene3229   | Potri.018G093100.1 | 8.375    | 3.0219  | 1.4706 | Up | 3.92E-29  | 2.32E-28  |
| Unigene30875  | Potri.009G073000.1 | 7.6578   | 2.7632  | 1.4706 | Up | 3.20E-15  | 1.18E-14  |
| Unigene88697  | Potri.006G200200.2 | 22.3357  | 8.0607  | 1.4704 | Up | 8.00E-15  | 2.89E-14  |
| Unigene5636   | Potri.003G115200.1 | 60.2296  | 21.7395 | 1.4702 | Up | 2.36E-27  | 1.33E-26  |
| Unigene35123  | Potri.013G015600.3 | 9.9693   | 3.5991  | 1.4699 | Up | 2.30E-26  | 1.25E-25  |
| Unigene45066  | Potri.002G005500.1 | 4.6472   | 1.6777  | 1.4699 | Up | 5.02E-14  | 1.75E-13  |
| Unigene53330  | Potri.009G145900.1 | 20.144   | 7.2739  | 1.4695 | Up | 1.99E-13  | 6.76E-13  |
| Unigene14356  | Potri.012G005900.8 | 5.8877   | 2.1262  | 1.4694 | Up | 3.15E-13  | 1.06E-12  |
| Unigene58982  | Potri.006G124800.1 | 24.918   | 9.0042  | 1.4685 | Up | 4.98E-12  | 1.58E-11  |
| Unigene36590  | Potri.011G080900.2 | 203.9922 | 73.7321 | 1.4681 | Up | 3.59E-122 | 9.88E-121 |
| Unigene116293 | Potri.003G164600.1 | 132.3303 | 47.8639 | 1.4671 | Up | 4.52E-74  | 6.76E-73  |
| Unigene3424   | Potri.013G059300.3 | 16.0752  | 5.8181  | 1.4662 | Up | 7.99E-10  | 2.25E-09  |
| Unigene26605  | Potri.001G249200.2 | 154.5095 | 55.9212 | 1.4662 | Up | 9.19E-85  | 1.61E-83  |
| Unigene17805  | Potri.018G032400.1 | 15.5841  | 5.6424  | 1.4657 | Up | 2.02E-09  | 5.57E-09  |
| Unigene6996   | Potri.009G108200.1 | 101.5728 | 36.7797 | 1.4655 | Up | 3.09E-64  | 3.96E-63  |
| Unigene34405  | Potri.004G038900.1 | 6.7252   | 2.4355  | 1.4654 | Up | 3.21E-09  | 8.73E-09  |
| Unigene67839  | Potri.005G173100.2 | 9.3456   | 3.3859  | 1.4647 | Up | 8.11E-09  | 2.16E-08  |
| Unigene3842   | Potri.004G187700.1 | 47.0058  | 17.0302 | 1.4647 | Up | 1.24E-23  | 6.23E-23  |
| Unigene38448  | Potri.002G103100.1 | 17.965   | 6.5095  | 1.4646 | Up | 4.69E-16  | 1.79E-15  |
| Unigene28315  | Potri.004G048600.1 | 39.5465  | 14.3311 | 1.4644 | Up | 3.40E-30  | 2.07E-29  |
| Unigene37794  | Potri.002G003100.4 | 7.7707   | 2.816   | 1.4644 | Up | 1.29E-08  | 3.39E-08  |
| Unigene110801 | Potri.008G069400.1 | 262.4172 | 95.1287 | 1.4639 | Up | 1.33E-104 | 3.01E-103 |
| Unigene5584   | Potri.015G126400.1 | 6.0762   | 2.2037  | 1.4632 | Up | 5.21E-08  | 1.32E-07  |
| Unigene6375   | Potri.006G041200.1 | 7.5345   | 2.7326  | 1.4632 | Up | 5.21E-08  | 1.32E-07  |
| Unigene110957 | Potri.010G238300.6 | 49.0784  | 17.8013 | 1.4631 | Up | 4.67E-21  | 2.15E-20  |

|               |                    |          |         |        |    |           |           |
|---------------|--------------------|----------|---------|--------|----|-----------|-----------|
| Unigene22252  | Potri.007G038500.2 | 10.5646  | 3.8327  | 1.4628 | Up | 2.90E-14  | 1.02E-13  |
| Unigene113006 | Potri.003G101600.1 | 14.2308  | 5.1644  | 1.4623 | Up | 1.32E-07  | 3.25E-07  |
| Unigene116344 | Potri.002G032500.7 | 106.8231 | 38.7864 | 1.4616 | Up | 3.53E-60  | 4.21E-59  |
| Unigene11560  | Potri.014G081000.2 | 7.8549   | 2.8531  | 1.4611 | Up | 7.24E-13  | 2.40E-12  |
| Unigene69367  | Potri.014G159100.1 | 8.4356   | 3.0659  | 1.4602 | Up | 8.58E-07  | 1.99E-06  |
| Unigene5650   | Potri.006G197700.2 | 10.3195  | 3.7506  | 1.4602 | Up | 8.58E-07  | 1.99E-06  |
| Unigene112684 | Potri.001G142200.1 | 63.1809  | 22.963  | 1.4602 | Up | 1.87E-28  | 1.09E-27  |
| Unigene110551 | Potri.002G182500.1 | 133.2127 | 48.4375 | 1.4595 | Up | 2.74E-53  | 2.86E-52  |
| Unigene107747 | Potri.015G038100.1 | 82.6837  | 30.0894 | 1.4583 | Up | 1.15E-30  | 7.12E-30  |
| Unigene26661  | Potri.018G084500.1 | 5.1981   | 1.892   | 1.4581 | Up | 3.51E-06  | 7.74E-06  |
| Unigene86445  | Potri.002G072100.3 | 9.17     | 3.3376  | 1.4581 | Up | 3.51E-06  | 7.74E-06  |
| Unigene25809  | Potri.014G098100.3 | 33.9945  | 12.3777 | 1.4576 | Up | 1.70E-15  | 6.32E-15  |
| Unigene65782  | Potri.005G216600.4 | 8.1737   | 2.9767  | 1.4573 | Up | 5.62E-06  | 1.22E-05  |
| Unigene365    | Potri.001G016200.1 | 20.9184  | 7.6194  | 1.457  | Up | 7.46E-65  | 9.66E-64  |
| Unigene33946  | Potri.012G074500.1 | 74.1497  | 27.0161 | 1.4566 | Up | 9.64E-55  | 1.04E-53  |
| Unigene90214  | Potri.T164300.1    | 6.7457   | 2.4581  | 1.4564 | Up | 9.01E-06  | 1.91E-05  |
| Unigene61778  | Potri.010G095200.2 | 3.513    | 1.2801  | 1.4564 | Up | 9.01E-06  | 1.91E-05  |
| Unigene31277  | Potri.001G288000.3 | 7.5375   | 2.7467  | 1.4564 | Up | 2.90E-10  | 8.39E-10  |
| Unigene43166  | Potri.016G113800.1 | 5.6269   | 2.051   | 1.456  | Up | 4.10E-23  | 2.02E-22  |
| Unigene41411  | Potri.T047300.1    | 48.5876  | 17.7132 | 1.4558 | Up | 4.15E-27  | 2.31E-26  |
| Unigene17850  | Potri.010G083500.1 | 12.3313  | 4.5016  | 1.4538 | Up | 2.93E-09  | 8.00E-09  |
| Unigene39247  | Potri.014G113500.1 | 24.7805  | 9.0472  | 1.4537 | Up | 1.61E-32  | 1.05E-31  |
| Unigene51109  | Potri.004G217200.1 | 81.135   | 29.6229 | 1.4536 | Up | 7.50E-48  | 7.02E-47  |
| Unigene93553  | Potri.015G104100.1 | 3.6801   | 1.344   | 1.4532 | Up | 3.73E-05  | 7.47E-05  |
| Unigene65512  | Potri.010G148500.2 | 6.3642   | 2.3253  | 1.4526 | Up | 7.41E-09  | 1.97E-08  |
| Unigene27331  | Potri.013G029500.1 | 41.4671  | 15.1536 | 1.4523 | Up | 3.80E-27  | 2.12E-26  |
| Unigene64586  | Potri.008G130600.1 | 4.6212   | 1.6892  | 1.4519 | Up | 6.01E-05  | 1.18E-04  |
| Unigene10716  | Potri.007G031400.1 | 27.9547  | 10.2227 | 1.4513 | Up | 1.73E-113 | 4.33E-112 |
| Unigene31839  | Potri.004G044200.1 | 7.0262   | 2.57    | 1.451  | Up | 2.32E-22  | 1.12E-21  |
| Unigene76710  | Potri.016G061200.1 | 8.7087   | 3.1865  | 1.4505 | Up | 9.68E-05  | 1.86E-04  |
| Unigene36785  | Potri.015G051200.1 | 4.1706   | 1.526   | 1.4505 | Up | 9.68E-05  | 1.86E-04  |
| Unigene42223  | Potri.014G095800.1 | 4.1444   | 1.5164  | 1.4505 | Up | 9.68E-05  | 1.86E-04  |
| Unigene5426   | Potri.012G096400.1 | 5.0302   | 1.8405  | 1.4505 | Up | 9.68E-05  | 1.86E-04  |
| Unigene47926  | Potri.009G163700.3 | 4.5867   | 1.6783  | 1.4505 | Up | 9.68E-05  | 1.86E-04  |
| Unigene38332  | Potri.005G258700.4 | 5.9724   | 2.1853  | 1.4505 | Up | 9.68E-05  | 1.86E-04  |
| Unigene87278  | Potri.003G045300.1 | 6.3159   | 2.311   | 1.4505 | Up | 9.68E-05  | 1.86E-04  |
| Unigene13474  | Potri.011G125500.1 | 6.0308   | 2.2087  | 1.4492 | Up | 5.66E-21  | 2.60E-20  |
| Unigene37767  | Potri.018G100400.1 | 152.9282 | 56.0133 | 1.449  | Up | 1.06E-129 | 3.14E-128 |
| Unigene24405  | Potri.008G137700.1 | 9.1197   | 3.3406  | 1.4489 | Up | 2.43E-14  | 8.60E-14  |

|               |                    |         |         |        |    |           |           |
|---------------|--------------------|---------|---------|--------|----|-----------|-----------|
| Unigene94304  | Potri.005G092700.2 | 4.3321  | 1.5869  | 1.4489 | Up | 7.57E-08  | 1.89E-07  |
| Unigene64535  | Potri.018G065600.2 | 5.536   | 2.0304  | 1.4471 | Up | 1.67E-10  | 4.89E-10  |
| Unigene12935  | Potri.006G242800.1 | 3.3584  | 1.2317  | 1.4471 | Up | 2.52E-04  | 4.63E-04  |
| Unigene636    | Potri.003G096100.1 | 20.3134 | 7.4522  | 1.4467 | Up | 5.37E-46  | 4.82E-45  |
| Unigene32060  | Potri.018G020800.3 | 26.5231 | 9.7335  | 1.4462 | Up | 2.56E-74  | 3.85E-73  |
| Unigene28075  | Potri.001G267500.1 | 64.6526 | 23.7284 | 1.4461 | Up | 2.02E-36  | 1.45E-35  |
| Unigene45308  | Potri.008G111900.3 | 7.4826  | 2.7482  | 1.4451 | Up | 6.67E-10  | 1.89E-09  |
| Unigene48501  | Potri.015G098400.6 | 6.8669  | 2.5221  | 1.445  | Up | 4.08E-04  | 7.30E-04  |
| Unigene91899  | Potri.008G132100.3 | 7.3927  | 2.7152  | 1.445  | Up | 4.90E-07  | 1.16E-06  |
| Unigene21144  | Potri.003G143300.1 | 16.2896 | 5.9829  | 1.445  | Up | 9.58E-13  | 3.15E-12  |
| Unigene41711  | Potri.012G070700.1 | 47.7728 | 17.5522 | 1.4445 | Up | 3.13E-51  | 3.13E-50  |
| Unigene10900  | Potri.009G032800.1 | 54.4415 | 20.0071 | 1.4442 | Up | 1.86E-110 | 4.53E-109 |
| Unigene93439  | Potri.015G074700.3 | 5.4947  | 2.0197  | 1.4439 | Up | 7.82E-07  | 1.82E-06  |
| Unigene1337   | Potri.002G192400.1 | 8.4717  | 3.1145  | 1.4437 | Up | 5.61E-15  | 2.04E-14  |
| Unigene18545  | Potri.018G137500.4 | 11.1034 | 4.083   | 1.4433 | Up | 3.81E-12  | 1.22E-11  |
| Unigene19835  | Potri.006G121300.1 | 13.2034 | 4.8602  | 1.4418 | Up | 4.25E-09  | 1.15E-08  |
| Unigene46217  | Potri.012G144700.1 | 7.2578  | 2.6724  | 1.4414 | Up | 1.51E-11  | 4.70E-11  |
| Unigene6709   | Potri.008G048800.3 | 6.6516  | 2.4492  | 1.4414 | Up | 2.00E-06  | 4.49E-06  |
| Unigene2771   | Potri.003G176700.1 | 5.5311  | 2.0373  | 1.4409 | Up | 6.75E-09  | 1.80E-08  |
| Unigene118492 | Potri.010G153400.1 | 25.8677 | 9.5294  | 1.4407 | Up | 3.00E-21  | 1.39E-20  |
| Unigene41026  | Potri.006G258600.2 | 41.9815 | 15.4688 | 1.4404 | Up | 1.24E-18  | 5.24E-18  |
| Unigene10823  | Potri.009G018500.1 | 7.0651  | 2.6035  | 1.4403 | Up | 7.03E-26  | 3.78E-25  |
| Unigene47130  | Potri.008G115200.2 | 15.0132 | 5.5354  | 1.4395 | Up | 8.19E-16  | 3.09E-15  |
| Unigene22596  | Potri.005G154300.1 | 4.1941  | 1.5464  | 1.4394 | Up | 8.19E-16  | 3.09E-15  |
| Unigene42104  | Potri.016G002100.1 | 7.9774  | 2.9423  | 1.439  | Up | 1.71E-08  | 4.46E-08  |
| Unigene48665  | Potri.008G126800.2 | 25.3683 | 9.3599  | 1.4385 | Up | 2.05E-15  | 7.60E-15  |
| Unigene52137  | Potri.001G086900.1 | 8.0558  | 2.9723  | 1.4384 | Up | 5.11E-06  | 1.11E-05  |
| Unigene21196  | Potri.010G100300.1 | 18.5532 | 6.8478  | 1.438  | Up | 6.44E-147 | 2.25E-145 |
| Unigene117020 | Potri.004G067400.1 | 86.1937 | 31.8182 | 1.4377 | Up | 2.19E-51  | 2.20E-50  |
| Unigene17154  | Potri.010G158100.4 | 21.5495 | 7.9581  | 1.4372 | Up | 6.67E-24  | 3.37E-23  |
| Unigene6209   | Potri.001G098300.1 | 4.0293  | 1.4883  | 1.4369 | Up | 8.19E-06  | 1.74E-05  |
| Unigene52326  | Potri.019G034000.2 | 8.0585  | 2.9767  | 1.4368 | Up | 8.19E-06  | 1.74E-05  |
| Unigene113620 | Potri.002G102500.1 | 86.355  | 31.898  | 1.4368 | Up | 3.53E-39  | 2.72E-38  |
| Unigene17100  | Potri.009G115800.2 | 18.7608 | 6.9367  | 1.4354 | Up | 3.47E-12  | 1.11E-11  |
| Unigene97161  | Potri.001G118700.4 | 5.2173  | 1.9296  | 1.435  | Up | 1.31E-05  | 2.75E-05  |
| Unigene5957   | Potri.010G199200.2 | 56.0427 | 20.7299 | 1.4348 | Up | 2.85E-58  | 3.28E-57  |
| Unigene17369  | Potri.003G121900.1 | 31.305  | 11.584  | 1.4343 | Up | 2.55E-22  | 1.22E-21  |
| Unigene21074  | Potri.002G164400.1 | 31.1015 | 11.5158 | 1.4334 | Up | 2.68E-54  | 2.85E-53  |
| Unigene19937  | Potri.006G071000.1 | 7.8012  | 2.8891  | 1.4331 | Up | 2.11E-05  | 4.32E-05  |

|               |                    |          |         |        |    |           |           |
|---------------|--------------------|----------|---------|--------|----|-----------|-----------|
| Unigene105329 | Potri.001G285100.1 | 17.2359  | 6.3832  | 1.4331 | Up | 1.53E-09  | 4.25E-09  |
| Unigene94131  | Potri.004G044600.1 | 6.2986   | 2.3327  | 1.433  | Up | 1.53E-09  | 4.25E-09  |
| Unigene331    | Potri.014G081300.3 | 14.5975  | 5.4125  | 1.4314 | Up | 2.78E-40  | 2.20E-39  |
| Unigene51307  | Potri.006G100300.4 | 84.7365  | 31.4312 | 1.4308 | Up | 3.17E-70  | 4.47E-69  |
| Unigene47304  | Potri.006G064200.1 | 71.0994  | 26.3932 | 1.4297 | Up | 5.71E-50  | 5.57E-49  |
| Unigene63025  | Potri.014G140500.5 | 3.4504   | 1.2818  | 1.4286 | Up | 5.44E-05  | 1.08E-04  |
| Unigene40375  | Potri.001G426000.1 | 6.9786   | 2.5926  | 1.4285 | Up | 5.44E-05  | 1.08E-04  |
| Unigene37752  | Potri.001G034200.2 | 36.0562  | 13.3951 | 1.4285 | Up | 2.92E-14  | 1.03E-13  |
| Unigene31478  | Potri.002G182500.1 | 33.3502  | 12.4101 | 1.4262 | Up | 1.42E-39  | 1.10E-38  |
| Unigene41476  | Potri.005G114300.1 | 3.4479   | 1.2832  | 1.426  | Up | 8.76E-05  | 1.69E-04  |
| Unigene51152  | Potri.008G199900.1 | 3.5991   | 1.3395  | 1.4259 | Up | 8.76E-05  | 1.69E-04  |
| Unigene113509 | Potri.010G141300.5 | 35.4054  | 13.1858 | 1.425  | Up | 9.95E-17  | 3.90E-16  |
| Unigene19704  | Potri.003G024000.1 | 6.236    | 2.3232  | 1.4245 | Up | 3.93E-08  | 1.00E-07  |
| Unigene94093  | Potri.010G096000.1 | 15.8775  | 5.9192  | 1.4235 | Up | 3.27E-21  | 1.52E-20  |
| Unigene34632  | Potri.009G104400.1 | 80.9591  | 30.1893 | 1.4232 | Up | 6.82E-136 | 2.14E-134 |
| Unigene37876  | Potri.001G347600.1 | 9.3249   | 3.4776  | 1.423  | Up | 1.41E-04  | 2.67E-04  |
| Unigene94671  | Potri.010G238800.1 | 62.8255  | 23.4503 | 1.4217 | Up | 4.51E-41  | 3.63E-40  |
| Unigene15158  | Potri.012G099300.1 | 15.881   | 5.9283  | 1.4216 | Up | 5.96E-30  | 3.61E-29  |
| Unigene21889  | Potri.015G051200.1 | 34.4304  | 12.8547 | 1.4214 | Up | 1.11E-62  | 1.38E-61  |
| Unigene57308  | Potri.015G036900.1 | 3.7349   | 1.3949  | 1.4209 | Up | 4.64E-06  | 1.01E-05  |
| Unigene93952  | Potri.006G078700.1 | 6.6934   | 2.5007  | 1.4204 | Up | 3.51E-09  | 9.55E-09  |
| Unigene46528  | Potri.001G031700.1 | 4.6624   | 1.7427  | 1.4197 | Up | 2.28E-04  | 4.20E-04  |
| Unigene50355  | Potri.019G125000.3 | 10.0518  | 3.759   | 1.419  | Up | 5.58E-09  | 1.50E-08  |
| Unigene24673  | Potri.018G029500.1 | 8.9818   | 3.36    | 1.4185 | Up | 7.42E-06  | 1.59E-05  |
| Unigene12060  | Potri.014G045000.3 | 13.6287  | 5.1004  | 1.418  | Up | 2.63E-13  | 8.90E-13  |
| Unigene20633  | Potri.010G042600.2 | 9.9535   | 3.725   | 1.418  | Up | 2.53E-07  | 6.10E-07  |
| Unigene4052   | Potri.005G243000.1 | 33.5343  | 12.55   | 1.418  | Up | 3.13E-19  | 1.35E-18  |
| Unigene2284   | Potri.001G336900.1 | 5.3934   | 2.0184  | 1.418  | Up | 2.53E-07  | 6.10E-07  |
| Unigene28845  | Potri.006G110300.1 | 11.6592  | 4.3645  | 1.4176 | Up | 3.57E-16  | 1.37E-15  |
| Unigene35354  | Potri.002G102500.2 | 13.8844  | 5.1975  | 1.4176 | Up | 8.87E-09  | 2.36E-08  |
| Unigene110355 | Potri.005G170400.1 | 23.584   | 8.8299  | 1.4173 | Up | 3.16E-10  | 9.14E-10  |
| Unigene26239  | Potri.001G249100.1 | 14.8148  | 5.5467  | 1.4173 | Up | 3.16E-10  | 9.14E-10  |
| Unigene23279  | Potri.014G097900.2 | 12.8511  | 4.8121  | 1.4172 | Up | 1.14E-11  | 3.57E-11  |
| Unigene13012  | Potri.004G158300.5 | 186.3996 | 69.7954 | 1.4172 | Up | 9.55E-119 | 2.54E-117 |
| Unigene108378 | Potri.015G038100.1 | 95.3211  | 35.7202 | 1.4161 | Up | 2.70E-34  | 1.84E-33  |
| Unigene92271  | Potri.005G197500.1 | 3.6819   | 1.3797  | 1.4161 | Up | 3.68E-04  | 6.65E-04  |
| Unigene2049   | Potri.002G029500.1 | 19.4975  | 7.3064  | 1.4161 | Up | 6.59E-13  | 2.18E-12  |
| Unigene54464  | Potri.001G224900.1 | 3.2312   | 1.2109  | 1.416  | Up | 3.68E-04  | 6.65E-04  |
| Unigene23100  | Potri.018G114200.1 | 138.8096 | 52.0324 | 1.4156 | Up | 3.39E-156 | 1.28E-154 |

|               |                    |          |         |        |    |           |           |
|---------------|--------------------|----------|---------|--------|----|-----------|-----------|
| Unigene104494 | Potri.014G153400.2 | 15.0814  | 5.6578  | 1.4145 | Up | 2.24E-08  | 5.80E-08  |
| Unigene30171  | Potri.006G001200.1 | 5.4752   | 2.054   | 1.4145 | Up | 2.24E-08  | 5.80E-08  |
| Unigene46419  | Potri.010G235700.1 | 3.4144   | 1.2819  | 1.4133 | Up | 1.91E-05  | 3.92E-05  |
| Unigene44088  | Potri.008G190200.2 | 5.2119   | 1.9568  | 1.4133 | Up | 9.55E-14  | 3.29E-13  |
| Unigene35820  | Potri.006G227500.3 | 4.0825   | 1.5328  | 1.4133 | Up | 1.91E-05  | 3.92E-05  |
| Unigene23090  | Potri.018G139800.3 | 10.631   | 3.9923  | 1.413  | Up | 2.61E-12  | 8.41E-12  |
| Unigene12386  | Potri.014G157900.1 | 28.1357  | 10.5669 | 1.4128 | Up | 8.33E-26  | 4.47E-25  |
| Unigene11115  | Potri.008G057400.2 | 42.727   | 16.05   | 1.4126 | Up | 4.36E-236 | 2.78E-234 |
| Unigene665    | Potri.002G239400.3 | 6.8231   | 2.5634  | 1.4124 | Up | 1.51E-13  | 5.17E-13  |
| Unigene98073  | Potri.001G102100.2 | 9.2443   | 3.4742  | 1.4119 | Up | 1.03E-06  | 2.36E-06  |
| Unigene26885  | Potri.009G111800.1 | 18.1622  | 6.8289  | 1.4112 | Up | 1.14E-10  | 3.38E-10  |
| Unigene33517  | Potri.003G052800.1 | 86.0641  | 32.3623 | 1.4111 | Up | 1.03E-70  | 1.47E-69  |
| Unigene59739  | Potri.009G149100.2 | 3.2682   | 1.2296  | 1.4103 | Up | 3.06E-05  | 6.17E-05  |
| Unigene7163   | Potri.001G011700.4 | 24.2255  | 9.1142  | 1.4103 | Up | 6.13E-21  | 2.81E-20  |
| Unigene64805  | Potri.016G068400.1 | 5.7729   | 2.1738  | 1.4091 | Up | 3.47E-14  | 1.22E-13  |
| Unigene100049 | Potri.008G112800.1 | 12.0101  | 4.5235  | 1.4087 | Up | 5.06E-09  | 1.37E-08  |
| Unigene36973  | Potri.008G174100.2 | 208.1597 | 78.4371 | 1.4081 | Up | 7.41E-101 | 1.60E-99  |
| Unigene43674  | Potri.004G133800.1 | 20.1888  | 7.6079  | 1.408  | Up | 3.19E-15  | 1.17E-14  |
| Unigene18538  | Potri.011G117300.3 | 9.5519   | 3.5998  | 1.4079 | Up | 1.09E-17  | 4.47E-17  |
| Unigene52274  | Potri.T015800.1    | 4.1792   | 1.5759  | 1.4071 | Up | 2.62E-06  | 5.83E-06  |
| Unigene19484  | Potri.012G094300.1 | 10.9475  | 4.128   | 1.4071 | Up | 4.55E-10  | 1.30E-09  |
| Unigene45788  | Potri.011G145900.1 | 29.3625  | 11.0719 | 1.4071 | Up | 9.10E-41  | 7.26E-40  |
| Unigene35178  | Potri.008G021800.1 | 14.346   | 5.4095  | 1.4071 | Up | 2.62E-06  | 5.83E-06  |
| Unigene32565  | Potri.004G067400.2 | 18.6325  | 7.0259  | 1.4071 | Up | 1.18E-34  | 8.08E-34  |
| Unigene93020  | Potri.003G217200.1 | 4.2466   | 1.6013  | 1.4071 | Up | 4.91E-05  | 9.73E-05  |
| Unigene11266  | Potri.001G098300.1 | 6.5726   | 2.4784  | 1.4071 | Up | 8.04E-09  | 2.14E-08  |
| Unigene12618  | Potri.011G080900.3 | 119.5757 | 45.1144 | 1.4063 | Up | 1.12E-95  | 2.27E-94  |
| Unigene104729 | Potri.001G207300.2 | 12.06    | 4.5503  | 1.4062 | Up | 4.66E-16  | 1.78E-15  |
| Unigene62639  | Potri.008G029400.2 | 5.8356   | 2.2037  | 1.405  | Up | 2.29E-07  | 5.53E-07  |
| Unigene65345  | Potri.010G223000.1 | 5.502    | 2.0785  | 1.4044 | Up | 4.19E-06  | 9.14E-06  |
| Unigene36157  | Potri.001G222200.4 | 17.235   | 6.5128  | 1.404  | Up | 1.15E-09  | 3.21E-09  |
| Unigene104873 | Potri.007G122700.1 | 3.4017   | 1.2859  | 1.4035 | Up | 7.90E-05  | 1.53E-04  |
| Unigene14260  | Potri.004G174100.5 | 99.272   | 37.527  | 1.4035 | Up | 2.71E-43  | 2.29E-42  |
| Unigene58092  | Potri.010G187700.1 | 9.3561   | 3.5392  | 1.4025 | Up | 2.90E-15  | 1.07E-14  |
| Unigene26278  | Potri.002G047900.1 | 4.2563   | 1.6102  | 1.4024 | Up | 1.82E-09  | 5.03E-09  |
| Unigene52328  | Potri.012G006000.1 | 12.396   | 4.6923  | 1.4015 | Up | 3.23E-08  | 8.28E-08  |
| Unigene6651   | Potri.019G083700.1 | 12.4836  | 4.7277  | 1.4008 | Up | 1.49E-11  | 4.62E-11  |
| Unigene1467   | Potri.008G033000.3 | 112.7025 | 42.6968 | 1.4003 | Up | 1.30E-86  | 2.33E-85  |
| Unigene11640  | Potri.013G142200.1 | 5.3007   | 2.0084  | 1.4001 | Up | 1.85E-21  | 8.63E-21  |

|               |                    |          |         |        |    |           |           |
|---------------|--------------------|----------|---------|--------|----|-----------|-----------|
| Unigene27609  | Potri.018G029500.3 | 6.925    | 2.6241  | 1.4    | Up | 2.60E-10  | 7.55E-10  |
| Unigene8676   | Potri.003G145200.1 | 6.0851   | 2.3067  | 1.3995 | Up | 1.27E-04  | 2.41E-04  |
| Unigene39321  | Potri.002G256100.1 | 8.6445   | 3.2769  | 1.3995 | Up | 1.27E-04  | 2.41E-04  |
| Unigene38372  | Potri.002G022800.2 | 22.5678  | 8.5548  | 1.3995 | Up | 1.14E-14  | 4.11E-14  |
| Unigene5519   | Potri.002G196200.1 | 194.0399 | 73.5744 | 1.3991 | Up | 2.77E-87  | 5.01E-86  |
| Unigene3787   | Potri.009G054200.2 | 36.7815  | 13.9532 | 1.3984 | Up | 1.81E-14  | 6.43E-14  |
| Unigene4744   | Potri.001G017600.1 | 10.4263  | 3.9552  | 1.3984 | Up | 1.07E-05  | 2.26E-05  |
| Unigene11234  | Potri.001G293300.1 | 14.6599  | 5.5638  | 1.3977 | Up | 7.02E-55  | 7.56E-54  |
| Unigene33391  | Potri.017G018600.1 | 7.2135   | 2.738   | 1.3976 | Up | 1.32E-18  | 5.58E-18  |
| Unigene10921  | Potri.004G002900.1 | 40.5351  | 15.3926 | 1.3969 | Up | 5.24E-69  | 7.25E-68  |
| Unigene93286  | Potri.001G016200.1 | 10.4653  | 3.9752  | 1.3965 | Up | 5.92E-11  | 1.78E-10  |
| Unigene7670   | Potri.019G089500.1 | 3.9569   | 1.5046  | 1.395  | Up | 1.72E-05  | 3.55E-05  |
| Unigene30785  | Potri.016G098500.4 | 30.0993  | 11.4452 | 1.395  | Up | 5.59E-17  | 2.22E-16  |
| Unigene92276  | Potri.014G179200.1 | 4.0821   | 1.5522  | 1.395  | Up | 2.05E-04  | 3.79E-04  |
| Unigene62707  | Potri.011G116000.1 | 3.4726   | 1.3204  | 1.395  | Up | 1.48E-06  | 3.37E-06  |
| Unigene96763  | Potri.005G117400.3 | 9.4641   | 3.5987  | 1.395  | Up | 2.05E-04  | 3.79E-04  |
| Unigene20021  | Potri.003G171200.3 | 10.4377  | 3.9689  | 1.395  | Up | 1.72E-05  | 3.55E-05  |
| Unigene50685  | Potri.002G229200.2 | 7.7328   | 2.9404  | 1.395  | Up | 1.30E-07  | 3.20E-07  |
| Unigene60084  | Potri.002G055300.1 | 11.7063  | 4.4513  | 1.395  | Up | 1.30E-07  | 3.20E-07  |
| Unigene37949  | Potri.001G141700.1 | 5.6239   | 2.1385  | 1.395  | Up | 1.72E-05  | 3.55E-05  |
| Unigene103138 | Potri.012G113400.1 | 22.4692  | 8.5509  | 1.3938 | Up | 5.53E-38  | 4.13E-37  |
| Unigene43095  | Potri.007G080900.1 | 11.2811  | 4.2939  | 1.3935 | Up | 5.67E-62  | 6.98E-61  |
| Unigene22743  | Potri.009G163700.4 | 109.14   | 41.5474 | 1.3933 | Up | 8.62E-116 | 2.22E-114 |
| Unigene11254  | Potri.002G002100.1 | 14.8342  | 5.6474  | 1.3933 | Up | 1.09E-26  | 5.99E-26  |
| Unigene51522  | Potri.010G124400.1 | 20.8066  | 7.9277  | 1.3921 | Up | 2.14E-11  | 6.58E-11  |
| Unigene7272   | Potri.008G039200.5 | 8.6211   | 3.2856  | 1.3917 | Up | 2.35E-10  | 6.85E-10  |
| Unigene57463  | Potri.004G159600.1 | 4.5317   | 1.7276  | 1.3913 | Up | 2.76E-05  | 5.60E-05  |
| Unigene43567  | Potri.015G137900.1 | 10.2797  | 3.9224  | 1.39   | Up | 6.88E-19  | 2.94E-18  |
| Unigene103964 | Potri.014G049300.6 | 11.0177  | 4.204   | 1.39   | Up | 3.30E-07  | 7.87E-07  |
| Unigene41516  | Potri.012G099600.1 | 5.6658   | 2.1619  | 1.39   | Up | 3.31E-04  | 6.00E-04  |
| Unigene39185  | Potri.010G036100.1 | 3.0922   | 1.1799  | 1.39   | Up | 3.31E-04  | 6.00E-04  |
| Unigene19584  | Potri.005G260100.2 | 3.6688   | 1.3999  | 1.39   | Up | 3.31E-04  | 6.00E-04  |
| Unigene97508  | Potri.003G008800.2 | 3.9349   | 1.5014  | 1.39   | Up | 3.31E-04  | 6.00E-04  |
| Unigene88742  | Potri.002G084300.1 | 5.2658   | 2.0093  | 1.39   | Up | 3.31E-04  | 6.00E-04  |
| Unigene118976 | Potri.001G076800.1 | 6.6433   | 2.5349  | 1.39   | Up | 3.30E-07  | 7.87E-07  |
| Unigene11084  | Potri.006G255800.1 | 24.1168  | 9.2039  | 1.3897 | Up | 2.27E-113 | 5.68E-112 |
| Unigene34770  | Potri.003G086100.1 | 3.3715   | 1.2874  | 1.3889 | Up | 3.78E-06  | 8.32E-06  |
| Unigene104342 | Potri.001G013300.1 | 37.2995  | 14.2429 | 1.3889 | Up | 8.65E-16  | 3.26E-15  |
| Unigene40932  | Potri.T137900.1    | 11.3655  | 4.3413  | 1.3885 | Up | 4.64E-08  | 1.18E-07  |



|               |                    |         |         |        |    |           |           |
|---------------|--------------------|---------|---------|--------|----|-----------|-----------|
| Unigene20664  | Potri.015G132300.3 | 31.683  | 12.1021 | 1.3885 | Up | 9.38E-15  | 3.39E-14  |
| Unigene63053  | Potri.006G043300.2 | 8.7297  | 3.3345  | 1.3885 | Up | 4.64E-08  | 1.18E-07  |
| Unigene44533  | Potri.001G158000.3 | 48.3326 | 18.4635 | 1.3883 | Up | 2.53E-53  | 2.64E-52  |
| Unigene22044  | Potri.010G097600.1 | 19.0789 | 7.2912  | 1.3877 | Up | 1.02E-82  | 1.73E-81  |
| Unigene13556  | Potri.003G067900.1 | 48.1871 | 18.4152 | 1.3877 | Up | 2.85E-128 | 8.31E-127 |
| Unigene119071 | Potri.001G072200.1 | 73.4827 | 28.0872 | 1.3875 | Up | 1.47E-68  | 2.02E-67  |
| Unigene927    | Potri.003G120900.1 | 9.0832  | 3.4724  | 1.3873 | Up | 3.67E-20  | 1.65E-19  |
| Unigene47503  | Potri.003G091000.2 | 41.593  | 15.9006 | 1.3873 | Up | 3.67E-20  | 1.65E-19  |
| Unigene39272  | Potri.003G145300.1 | 40.2522 | 15.3911 | 1.387  | Up | 4.56E-57  | 5.13E-56  |
| Unigene96879  | Potri.001G204300.2 | 23.1751 | 8.8644  | 1.3865 | Up | 1.22E-11  | 3.80E-11  |
| Unigene11189  | Potri.005G083000.1 | 15.751  | 6.025   | 1.3864 | Up | 5.79E-20  | 2.57E-19  |
| Unigene45898  | Potri.001G011700.1 | 59.6261 | 22.813  | 1.3861 | Up | 7.34E-42  | 6.01E-41  |
| Unigene20309  | Potri.001G418600.3 | 6.4869  | 2.4828  | 1.3856 | Up | 6.04E-06  | 1.30E-05  |
| Unigene13204  | Potri.006G105100.1 | 57.3996 | 21.984  | 1.3846 | Up | 6.97E-69  | 9.63E-68  |
| Unigene61853  | Potri.019G072300.1 | 3.3909  | 1.2989  | 1.3844 | Up | 5.36E-04  | 9.47E-04  |
| Unigene109304 | Potri.007G013100.1 | 15.7604 | 6.0372  | 1.3844 | Up | 8.38E-07  | 1.94E-06  |
| Unigene114841 | Potri.019G089800.3 | 24.238  | 9.2847  | 1.3843 | Up | 2.79E-12  | 8.96E-12  |
| Unigene67168  | Potri.010G214900.1 | 4.1753  | 1.5994  | 1.3843 | Up | 5.36E-04  | 9.47E-04  |
| Unigene99053  | Potri.004G124800.3 | 44.3512 | 16.9937 | 1.384  | Up | 2.18E-44  | 1.88E-43  |
| Unigene32820  | Potri.002G254800.1 | 19.7752 | 7.578   | 1.3838 | Up | 5.69E-31  | 3.55E-30  |
| Unigene50353  | Potri.002G057400.2 | 12.7776 | 4.8979  | 1.3834 | Up | 9.86E-24  | 4.96E-23  |
| Unigene31039  | Potri.019G131900.2 | 6.2519  | 2.3974  | 1.3828 | Up | 7.11E-05  | 1.39E-04  |
| Unigene60796  | Potri.007G077000.1 | 3.5179  | 1.3499  | 1.3819 | Up | 9.67E-06  | 2.04E-05  |
| Unigene70233  | Potri.005G225200.1 | 4.4491  | 1.7072  | 1.3819 | Up | 9.67E-06  | 2.04E-05  |
| Unigene41512  | Potri.003G173100.1 | 6.9372  | 2.6619  | 1.3819 | Up | 3.37E-10  | 9.73E-10  |
| Unigene15801  | Potri.001G355100.1 | 20.9451 | 8.037   | 1.3819 | Up | 3.37E-10  | 9.73E-10  |
| Unigene18438  | Potri.007G017200.1 | 23.1446 | 8.8825  | 1.3816 | Up | 2.36E-29  | 1.41E-28  |
| Unigene22681  | Potri.004G140600.8 | 12.5518 | 4.8178  | 1.3814 | Up | 2.85E-16  | 1.10E-15  |
| Unigene46724  | Potri.005G115900.1 | 11.5073 | 4.4175  | 1.3812 | Up | 1.34E-06  | 3.04E-06  |
| Unigene5394   | Potri.016G064100.1 | 8.9737  | 3.4468  | 1.3804 | Up | 2.64E-08  | 6.79E-08  |
| Unigene43804  | Potri.004G101700.1 | 22.581  | 8.674   | 1.3803 | Up | 6.07E-23  | 2.97E-22  |
| Unigene48197  | Potri.003G159200.2 | 80.5331 | 30.938  | 1.3802 | Up | 9.21E-47  | 8.41E-46  |
| Unigene23565  | Potri.014G153400.1 | 8.8593  | 3.4045  | 1.3797 | Up | 7.66E-11  | 2.29E-10  |
| Unigene39279  | Potri.004G010400.1 | 17.3847 | 6.6829  | 1.3793 | Up | 6.63E-27  | 3.68E-26  |
| Unigene20719  | Potri.006G227700.3 | 15.5161 | 5.9655  | 1.3791 | Up | 1.03E-16  | 4.05E-16  |
| Unigene30895  | Potri.002G247700.1 | 27.2652 | 10.4831 | 1.379  | Up | 1.51E-17  | 6.13E-17  |
| Unigene25831  | Potri.002G117800.1 | 32.2565 | 12.4041 | 1.3788 | Up | 1.02E-21  | 4.82E-21  |
| Unigene28519  | Potri.002G123600.3 | 5.468   | 2.1039  | 1.3779 | Up | 1.14E-04  | 2.18E-04  |
| Unigene3663   | Potri.006G021700.4 | 26.215  | 10.0911 | 1.3773 | Up | 1.23E-29  | 7.39E-29  |

|               |                    |          |         |        |    |           |           |
|---------------|--------------------|----------|---------|--------|----|-----------|-----------|
| Unigene8741   | Potri.005G069500.1 | 210.843  | 81.2527 | 1.3757 | Up | 1.80E-168 | 7.52E-167 |
| Unigene49834  | Potri.014G096200.1 | 63.5975  | 24.5295 | 1.3745 | Up | 2.25E-65  | 2.94E-64  |
| Unigene26244  | Potri.014G056700.1 | 7.0099   | 2.7039  | 1.3744 | Up | 3.40E-06  | 7.51E-06  |
| Unigene27719  | Potri.009G011200.2 | 9.6526   | 3.7232  | 1.3744 | Up | 3.40E-06  | 7.51E-06  |
| Unigene552    | Potri.001G153500.1 | 4.1353   | 1.5959  | 1.3736 | Up | 2.08E-13  | 7.07E-13  |
| Unigene17596  | Potri.012G002100.8 | 8.2735   | 3.194   | 1.3731 | Up | 1.50E-08  | 3.92E-08  |
| Unigene26337  | Potri.009G137600.2 | 48.3574  | 18.6701 | 1.373  | Up | 7.27E-19  | 3.10E-18  |
| Unigene12977  | Potri.008G194100.1 | 279.2709 | 107.844 | 1.3727 | Up | 5.81E-174 | 2.52E-172 |
| Unigene2257   | Potri.005G222300.1 | 9.9967   | 3.8603  | 1.3727 | Up | 4.96E-18  | 2.05E-17  |
| Unigene14272  | Potri.009G159200.1 | 28.4443  | 10.9859 | 1.3725 | Up | 4.77E-14  | 1.67E-13  |
| Unigene92545  | Potri.001G025900.1 | 4.076    | 1.5743  | 1.3724 | Up | 1.84E-04  | 3.43E-04  |
| Unigene64689  | Potri.017G028500.1 | 9.3896   | 3.6278  | 1.372  | Up | 4.82E-10  | 1.38E-09  |
| Unigene53119  | Potri.002G014700.1 | 126.0923 | 48.7201 | 1.3719 | Up | 1.38E-46  | 1.26E-45  |
| Unigene13208  | Potri.014G056700.5 | 6.0028   | 2.3203  | 1.3713 | Up | 3.38E-09  | 9.19E-09  |
| Unigene29857  | Potri.004G048600.1 | 17.3249  | 6.6975  | 1.3712 | Up | 1.58E-11  | 4.88E-11  |
| Unigene8464   | Potri.006G180900.1 | 8.3125   | 3.2148  | 1.3706 | Up | 1.09E-10  | 3.25E-10  |
| Unigene41795  | Potri.014G016800.5 | 97.4848  | 37.7132 | 1.3701 | Up | 9.04E-99  | 1.91E-97  |
| Unigene597    | Potri.006G090700.1 | 31.4521  | 12.1701 | 1.3698 | Up | 2.57E-43  | 2.17E-42  |
| Unigene20602  | Potri.003G116600.1 | 15.4869  | 5.9925  | 1.3698 | Up | 7.64E-10  | 2.16E-09  |
| Unigene2069   | Potri.011G116100.1 | 3.0683   | 1.188   | 1.3689 | Up | 3.98E-05  | 7.95E-05  |
| Unigene4850   | Potri.001G137900.2 | 16.8069  | 6.5122  | 1.3678 | Up | 3.77E-08  | 9.63E-08  |
| Unigene28720  | Potri.002G199600.1 | 10.1726  | 3.9431  | 1.3673 | Up | 1.30E-12  | 4.24E-12  |
| Unigene56132  | Potri.015G093600.2 | 4.6624   | 1.8083  | 1.3664 | Up | 2.97E-04  | 5.41E-04  |
| Unigene31257  | Potri.014G135700.1 | 4.1722   | 1.6182  | 1.3664 | Up | 2.68E-07  | 6.45E-07  |
| Unigene8557   | Potri.013G008400.6 | 45.9487  | 17.8213 | 1.3664 | Up | 1.73E-26  | 9.47E-26  |
| Unigene34467  | Potri.011G118100.1 | 3.4314   | 1.3309  | 1.3664 | Up | 2.68E-07  | 6.45E-07  |
| Unigene108051 | Potri.010G249300.1 | 13.7131  | 5.3186  | 1.3664 | Up | 8.69E-06  | 1.84E-05  |
| Unigene45468  | Potri.013G006000.3 | 40.2768  | 15.6276 | 1.3659 | Up | 2.72E-100 | 5.84E-99  |
| Unigene37003  | Potri.004G189900.1 | 79.6967  | 30.9426 | 1.3649 | Up | 4.57E-39  | 3.51E-38  |
| Unigene71582  | Potri.003G223200.4 | 81.0301  | 31.4751 | 1.3642 | Up | 2.30E-27  | 1.30E-26  |
| Unigene104347 | Potri.001G370300.1 | 9.402    | 3.6532  | 1.3638 | Up | 6.38E-05  | 1.25E-04  |
| Unigene42759  | Potri.011G051600.1 | 33.559   | 13.0402 | 1.3637 | Up | 4.62E-57  | 5.20E-56  |
| Unigene21873  | Potri.009G161500.1 | 7.8999   | 3.0705  | 1.3634 | Up | 9.87E-11  | 2.94E-10  |
| Unigene40560  | Potri.001G410600.1 | 8.8896   | 3.4557  | 1.3631 | Up | 4.26E-07  | 1.01E-06  |
| Unigene4389   | Potri.T170100.1    | 70.7052  | 27.4893 | 1.3629 | Up | 7.77E-42  | 6.36E-41  |
| Unigene24355  | Potri.009G081600.7 | 36.5508  | 14.2186 | 1.3621 | Up | 4.35E-47  | 4.00E-46  |
| Unigene13947  | Potri.014G039400.1 | 3.4255   | 1.3327  | 1.362  | Up | 1.39E-05  | 2.91E-05  |
| Unigene2383   | Potri.006G026700.1 | 6.4146   | 2.4956  | 1.362  | Up | 9.53E-08  | 2.36E-07  |
| Unigene5103   | Potri.006G051800.2 | 26.6824  | 10.3849 | 1.3614 | Up | 7.66E-24  | 3.87E-23  |

|               |                    |          |         |        |    |          |          |
|---------------|--------------------|----------|---------|--------|----|----------|----------|
| Unigene52518  | Potri.018G132500.1 | 55.7544  | 21.7028 | 1.3612 | Up | 1.41E-26 | 7.74E-26 |
| Unigene90056  | Potri.005G185700.1 | 8.3222   | 3.2407  | 1.3607 | Up | 3.06E-06 | 6.77E-06 |
| Unigene44308  | Potri.016G029700.3 | 5.3935   | 2.1003  | 1.3606 | Up | 3.06E-06 | 6.77E-06 |
| Unigene25253  | Potri.013G079900.1 | 6.2387   | 2.4311  | 1.3596 | Up | 4.79E-04 | 8.49E-04 |
| Unigene54272  | Potri.008G043800.1 | 5.729    | 2.2325  | 1.3596 | Up | 4.79E-04 | 8.49E-04 |
| Unigene33482  | Potri.004G148300.1 | 8.2015   | 3.196   | 1.3596 | Up | 1.85E-12 | 6.00E-12 |
| Unigene102589 | Potri.006G129500.1 | 14.088   | 5.4929  | 1.3588 | Up | 1.51E-07 | 3.70E-07 |
| Unigene94039  | Potri.015G106600.1 | 26.5091  | 10.3397 | 1.3583 | Up | 2.96E-31 | 1.86E-30 |
| Unigene45459  | Potri.006G136000.1 | 35.0817  | 13.6847 | 1.3582 | Up | 5.72E-42 | 4.70E-41 |
| Unigene63073  | Potri.008G183900.1 | 3.905    | 1.5233  | 1.3581 | Up | 1.02E-04 | 1.97E-04 |
| Unigene67082  | Potri.007G124300.1 | 4.5449   | 1.7729  | 1.3581 | Up | 1.02E-04 | 1.97E-04 |
| Unigene2976   | Potri.014G174700.1 | 26.7331  | 10.4353 | 1.3572 | Up | 1.45E-45 | 1.29E-44 |
| Unigene31229  | Potri.003G181100.1 | 4.5713   | 1.7844  | 1.3572 | Up | 2.22E-05 | 4.55E-05 |
| Unigene17530  | Potri.012G071900.1 | 5.4876   | 2.1421  | 1.3571 | Up | 2.22E-05 | 4.55E-05 |
| Unigene10117  | Potri.007G051600.1 | 5.3618   | 2.093   | 1.3571 | Up | 2.22E-05 | 4.55E-05 |
| Unigene38427  | Potri.004G236600.2 | 98.2302  | 38.3527 | 1.3568 | Up | 4.87E-95 | 9.74E-94 |
| Unigene113785 | Potri.006G022100.1 | 67.2826  | 26.2749 | 1.3565 | Up | 9.15E-29 | 5.36E-28 |
| Unigene33505  | Potri.003G073400.1 | 48.6997  | 19.0194 | 1.3564 | Up | 1.63E-52 | 1.67E-51 |
| Unigene5186   | Potri.002G094100.3 | 40.1048  | 15.6711 | 1.3557 | Up | 6.24E-24 | 3.16E-23 |
| Unigene69869  | Potri.019G029200.1 | 5.7112   | 2.2325  | 1.3551 | Up | 5.39E-08 | 1.36E-07 |
| Unigene41611  | Potri.003G099400.1 | 7.5265   | 2.9421  | 1.3551 | Up | 5.39E-08 | 1.36E-07 |
| Unigene67083  | Potri.018G149400.1 | 3.1855   | 1.248   | 1.3519 | Up | 1.65E-04 | 3.08E-04 |
| Unigene93771  | Potri.016G019900.1 | 7.0409   | 2.7584  | 1.3519 | Up | 1.92E-08 | 5.01E-08 |
| Unigene4516   | Potri.013G022700.2 | 6.1978   | 2.4281  | 1.3519 | Up | 1.65E-04 | 3.08E-04 |
| Unigene3532   | Potri.004G040100.2 | 4.3417   | 1.701   | 1.3519 | Up | 3.56E-05 | 7.14E-05 |
| Unigene34135  | Potri.002G196300.1 | 37.3425  | 14.6296 | 1.3519 | Up | 1.26E-51 | 1.27E-50 |
| Unigene24579  | Potri.003G223200.4 | 137.6531 | 53.963  | 1.351  | Up | 3.52E-46 | 3.17E-45 |
| Unigene21928  | Potri.006G213400.5 | 11.3207  | 4.4415  | 1.3498 | Up | 1.82E-11 | 5.63E-11 |
| Unigene46858  | Potri.010G021800.1 | 130.3575 | 51.1573 | 1.3495 | Up | 2.33E-60 | 2.79E-59 |
| Unigene5396   | Potri.008G133700.4 | 10.5079  | 4.1235  | 1.3495 | Up | 3.52E-10 | 1.02E-09 |
| Unigene43905  | Potri.002G004900.1 | 16.6398  | 6.5319  | 1.3491 | Up | 1.32E-30 | 8.17E-30 |
| Unigene24846  | Potri.014G076400.8 | 12.916   | 5.0719  | 1.3486 | Up | 1.36E-07 | 3.34E-07 |
| Unigene28319  | Potri.006G071500.1 | 7.8256   | 3.073   | 1.3486 | Up | 1.36E-07 | 3.34E-07 |
| Unigene6106   | Potri.010G021800.1 | 118.277  | 46.4595 | 1.3481 | Up | 1.70E-50 | 1.67E-49 |
| Unigene37500  | Potri.018G063000.2 | 33.3733  | 13.1131 | 1.3477 | Up | 3.45E-16 | 1.32E-15 |
| Unigene61025  | Potri.010G243900.2 | 6.3664   | 2.5015  | 1.3477 | Up | 2.74E-06 | 6.09E-06 |
| Unigene39849  | Potri.001G359600.3 | 4.2557   | 1.6721  | 1.3477 | Up | 2.74E-06 | 6.09E-06 |
| Unigene110864 | Potri.005G053400.1 | 40.0929  | 15.7554 | 1.3475 | Up | 1.50E-15 | 5.59E-15 |
| Unigene40845  | Potri.003G008800.2 | 4.7507   | 1.8675  | 1.347  | Up | 1.25E-05 | 2.61E-05 |

|               |                    |          |         |        |    |           |           |
|---------------|--------------------|----------|---------|--------|----|-----------|-----------|
| Unigene22348  | Potri.004G124800.3 | 84.5456  | 33.2396 | 1.3468 | Up | 1.82E-106 | 4.20E-105 |
| Unigene32165  | Potri.002G248900.1 | 70.5448  | 27.7365 | 1.3468 | Up | 5.45E-101 | 1.18E-99  |
| Unigene16752  | Potri.005G020600.5 | 3.9494   | 1.5534  | 1.3462 | Up | 5.71E-05  | 1.12E-04  |
| Unigene77141  | Potri.004G106800.4 | 10.2168  | 4.0185  | 1.3462 | Up | 5.71E-05  | 1.12E-04  |
| Unigene28886  | Potri.017G085400.5 | 15.1722  | 5.9681  | 1.3461 | Up | 8.06E-30  | 4.87E-29  |
| Unigene48340  | Potri.T125700.2    | 6.723    | 2.6465  | 1.345  | Up | 2.16E-07  | 5.22E-07  |
| Unigene16644  | Potri.001G104400.2 | 44.4857  | 17.5119 | 1.345  | Up | 1.97E-16  | 7.63E-16  |
| Unigene38999  | Potri.013G056900.3 | 37.4847  | 14.7578 | 1.3448 | Up | 9.54E-25  | 4.96E-24  |
| Unigene51811  | Potri.010G118900.1 | 7.2988   | 2.8742  | 1.3445 | Up | 8.81E-10  | 2.48E-09  |
| Unigene39085  | Potri.004G127400.4 | 9.3319   | 3.6753  | 1.3443 | Up | 1.70E-20  | 7.69E-20  |
| Unigene9298   | Potri.010G232200.1 | 15.3489  | 6.0456  | 1.3442 | Up | 9.69E-07  | 2.23E-06  |
| Unigene20887  | Potri.002G240900.1 | 47.1907  | 18.5877 | 1.3442 | Up | 7.39E-73  | 1.09E-71  |
| Unigene115196 | Potri.019G079000.2 | 93.3802  | 36.7893 | 1.3438 | Up | 3.55E-42  | 2.93E-41  |
| Unigene35819  | Potri.009G167000.1 | 9.72     | 3.8312  | 1.3432 | Up | 1.73E-08  | 4.51E-08  |
| Unigene27715  | Potri.002G163200.2 | 5.3753   | 2.1187  | 1.3432 | Up | 4.38E-06  | 9.54E-06  |
| Unigene13340  | Potri.006G075000.1 | 6.039    | 2.3813  | 1.3426 | Up | 3.16E-10  | 9.14E-10  |
| Unigene11725  | Potri.008G211100.1 | 14.1029  | 5.5628  | 1.3421 | Up | 1.90E-22  | 9.13E-22  |
| Unigene50624  | Potri.002G124200.4 | 7.4518   | 2.9393  | 1.3421 | Up | 5.90E-12  | 1.87E-11  |
| Unigene33982  | Potri.002G196700.3 | 32.1855  | 12.6964 | 1.342  | Up | 1.38E-34  | 9.48E-34  |
| Unigene66168  | Potri.T070200.1    | 3.3565   | 1.3242  | 1.3418 | Up | 1.99E-05  | 4.09E-05  |
| Unigene17093  | Potri.010G191700.8 | 5.4491   | 2.1498  | 1.3418 | Up | 1.99E-05  | 4.09E-05  |
| Unigene44510  | Potri.001G091100.1 | 6.308    | 2.4905  | 1.3407 | Up | 1.14E-10  | 3.37E-10  |
| Unigene82306  | Potri.001G437400.1 | 31.7046  | 12.5192 | 1.3405 | Up | 4.03E-14  | 1.41E-13  |
| Unigene74442  | Potri.002G053000.1 | 48.524   | 19.1624 | 1.3404 | Up | 1.48E-17  | 6.01E-17  |
| Unigene25440  | Potri.014G013500.5 | 3.443    | 1.3601  | 1.34   | Up | 9.16E-05  | 1.76E-04  |
| Unigene5724   | Potri.010G108000.2 | 6.431    | 2.5404  | 1.34   | Up | 9.16E-05  | 1.76E-04  |
| Unigene19562  | Potri.014G087700.1 | 18.6498  | 7.3721  | 1.339  | Up | 2.33E-17  | 9.38E-17  |
| Unigene6100   | Potri.011G080900.2 | 27.5389  | 10.8913 | 1.3383 | Up | 5.24E-24  | 2.66E-23  |
| Unigene36618  | Potri.018G100400.1 | 144.4978 | 57.1741 | 1.3376 | Up | 1.45E-55  | 1.59E-54  |
| Unigene13471  | Potri.001G174300.1 | 29.1403  | 11.5304 | 1.3376 | Up | 8.90E-33  | 5.83E-32  |
| Unigene64247  | Potri.009G082300.6 | 4.8415   | 1.9161  | 1.3373 | Up | 5.46E-07  | 1.28E-06  |
| Unigene108814 | Potri.009G041400.4 | 200.1743 | 79.2223 | 1.3373 | Up | 2.31E-65  | 3.01E-64  |
| Unigene85238  | Potri.009G009300.1 | 6.3682   | 2.5203  | 1.3373 | Up | 4.27E-04  | 7.62E-04  |
| Unigene20500  | Potri.010G232800.1 | 3.9732   | 1.5725  | 1.3372 | Up | 4.27E-04  | 7.62E-04  |
| Unigene39574  | Potri.008G090800.1 | 5.6676   | 2.2441  | 1.3366 | Up | 4.34E-08  | 1.10E-07  |
| Unigene32181  | Potri.015G087700.2 | 25.2674  | 10.0058 | 1.3364 | Up | 1.24E-39  | 9.64E-39  |
| Unigene33513  | Potri.008G034600.1 | 16.5993  | 6.5748  | 1.3361 | Up | 7.87E-21  | 3.60E-20  |
| Unigene10728  | Potri.002G042200.1 | 17.0395  | 6.7501  | 1.3359 | Up | 1.59E-34  | 1.08E-33  |
| Unigene34313  | Potri.006G241400.1 | 20.4023  | 8.0878  | 1.3349 | Up | 1.18E-45  | 1.05E-44  |

|               |                    |          |          |        |    |          |          |
|---------------|--------------------|----------|----------|--------|----|----------|----------|
| Unigene25767  | Potri.009G060000.1 | 4.9653   | 1.9686   | 1.3347 | Up | 1.09E-15 | 4.09E-15 |
| Unigene94852  | Potri.019G035800.3 | 15.5026  | 6.1534   | 1.3331 | Up | 5.54E-09 | 1.49E-08 |
| Unigene9553   | Potri.001G348500.2 | 26.007   | 10.3228  | 1.3331 | Up | 2.06E-14 | 7.33E-14 |
| Unigene34153  | Potri.001G288000.5 | 6.6481   | 2.6388   | 1.3331 | Up | 8.68E-07 | 2.01E-06 |
| Unigene44923  | Potri.017G134000.1 | 8.4466   | 3.3555   | 1.3318 | Up | 1.11E-20 | 5.07E-20 |
| Unigene108199 | Potri.001G251600.1 | 304.9466 | 121.1437 | 1.3318 | Up | 9.94E-96 | 2.01E-94 |
| Unigene40239  | Potri.016G098500.2 | 46.8343  | 18.6067  | 1.3317 | Up | 1.50E-45 | 1.33E-44 |
| Unigene41760  | Potri.006G119000.1 | 51.4639  | 20.4487  | 1.3316 | Up | 2.78E-32 | 1.80E-31 |
| Unigene42338  | Potri.002G051300.2 | 10.4143  | 4.1379   | 1.3316 | Up | 1.98E-09 | 5.47E-09 |
| Unigene15705  | Potri.014G151200.1 | 74.5991  | 29.6448  | 1.3314 | Up | 4.55E-29 | 2.69E-28 |
| Unigene88299  | Potri.009G038300.4 | 9.4944   | 3.775    | 1.3306 | Up | 3.92E-06 | 8.60E-06 |
| Unigene42199  | Potri.015G086600.1 | 3.9942   | 1.5889   | 1.3299 | Up | 5.10E-05 | 1.01E-04 |
| Unigene50640  | Potri.002G256700.1 | 9.3429   | 3.7166   | 1.3299 | Up | 8.77E-09 | 2.33E-08 |
| Unigene42728  | Potri.017G134700.1 | 4.8817   | 1.9433   | 1.3289 | Up | 3.90E-18 | 1.62E-17 |
| Unigene118034 | Potri.007G106500.1 | 149.1054 | 59.3781  | 1.3283 | Up | 1.68E-91 | 3.21E-90 |
| Unigene3912   | Potri.015G066500.1 | 6.2253   | 2.4799   | 1.3279 | Up | 3.89E-08 | 9.93E-08 |
| Unigene64441  | Potri.001G219200.3 | 4.3094   | 1.7166   | 1.3279 | Up | 3.89E-08 | 9.93E-08 |
| Unigene113670 | Potri.002G170000.2 | 10.5537  | 4.2054   | 1.3274 | Up | 1.78E-05 | 3.67E-05 |
| Unigene25147  | Potri.011G129400.1 | 42.4282  | 16.9113  | 1.327  | Up | 7.34E-17 | 2.90E-16 |
| Unigene11002  | Potri.002G027600.2 | 6.6424   | 2.6476   | 1.327  | Up | 7.34E-17 | 2.90E-16 |
| Unigene49072  | Potri.007G134600.3 | 31.2181  | 12.4487  | 1.3264 | Up | 8.09E-19 | 3.45E-18 |
| Unigene117598 | Potri.003G044100.1 | 121.6246 | 48.5031  | 1.3263 | Up | 2.36E-69 | 3.28E-68 |
| Unigene48332  | Potri.013G158600.1 | 8.8341   | 3.525    | 1.3255 | Up | 2.36E-04 | 4.35E-04 |
| Unigene1629   | Potri.010G180100.1 | 7.5721   | 3.0214   | 1.3255 | Up | 4.96E-09 | 1.34E-08 |
| Unigene6241   | Potri.003G086100.1 | 8.6322   | 3.4444   | 1.3255 | Up | 1.45E-10 | 4.26E-10 |
| Unigene107912 | Potri.018G109800.1 | 100.1968 | 39.9882  | 1.3252 | Up | 3.17E-32 | 2.05E-31 |
| Unigene49547  | Potri.015G000900.2 | 14.7463  | 5.8876   | 1.3246 | Up | 5.20E-11 | 1.57E-10 |
| Unigene23007  | Potri.001G113600.1 | 5.5699   | 2.225    | 1.3238 | Up | 1.87E-11 | 5.77E-11 |
| Unigene34020  | Potri.017G038500.1 | 52.9617  | 21.1655  | 1.3232 | Up | 3.24E-34 | 2.20E-33 |
| Unigene2636   | Potri.010G085600.1 | 7.1376   | 2.8527   | 1.3231 | Up | 2.18E-15 | 8.07E-15 |
| Unigene37375  | Potri.001G254800.2 | 17.2152  | 6.8803   | 1.3231 | Up | 6.73E-12 | 2.13E-11 |
| Unigene8308   | Potri.005G153200.1 | 23.5948  | 9.4374   | 1.322  | Up | 3.49E-20 | 1.56E-19 |
| Unigene49121  | Potri.001G158000.2 | 9.7661   | 3.9065   | 1.3219 | Up | 4.34E-24 | 2.21E-23 |
| Unigene2691   | Potri.008G211000.1 | 11.352   | 4.5427   | 1.3213 | Up | 2.81E-09 | 7.69E-09 |
| Unigene44566  | Potri.017G063000.1 | 11.2985  | 4.5257   | 1.3199 | Up | 3.61E-10 | 1.04E-09 |
| Unigene52731  | Potri.011G142200.1 | 6.5823   | 2.6366   | 1.3199 | Up | 9.95E-06 | 2.10E-05 |
| Unigene52686  | Potri.005G166100.1 | 11.9727  | 4.7958   | 1.3199 | Up | 9.95E-06 | 2.10E-05 |
| Unigene35679  | Potri.001G154300.4 | 6.3523   | 2.5445   | 1.3199 | Up | 9.95E-06 | 2.10E-05 |
| Unigene34182  | Potri.013G011800.1 | 13.3102  | 5.3358   | 1.3188 | Up | 1.14E-20 | 5.18E-20 |

|               |                     |         |         |        |    |          |          |
|---------------|---------------------|---------|---------|--------|----|----------|----------|
| Unigene34891  | Potri.001G095000.1  | 26.9052 | 10.7893 | 1.3183 | Up | 4.57E-76 | 7.06E-75 |
| Unigene40558  | Potri.001G031400.3  | 14.5172 | 5.8223  | 1.3181 | Up | 4.44E-09 | 1.20E-08 |
| Unigene98595  | Potri.001G435500.2  | 6.7949  | 2.7257  | 1.3178 | Up | 1.23E-06 | 2.82E-06 |
| Unigene27016  | Potri.017G036400.1  | 7.8606  | 3.155   | 1.317  | Up | 3.80E-04 | 6.86E-04 |
| Unigene109121 | Potri.010G193800.3  | 17.946  | 7.203   | 1.317  | Up | 4.37E-07 | 1.03E-06 |
| Unigene87308  | Potri.003G072300.1  | 6.0582  | 2.4316  | 1.317  | Up | 3.80E-04 | 6.86E-04 |
| Unigene91732  | Potri.008G049900.1  | 5.0474  | 2.0277  | 1.3157 | Up | 1.31E-04 | 2.48E-04 |
| Unigene95604  | Potri.003G006500.4  | 9.0937  | 3.6532  | 1.3157 | Up | 1.31E-04 | 2.48E-04 |
| Unigene24235  | Potri.006G052900.1  | 15.9603 | 6.4125  | 1.3155 | Up | 1.35E-21 | 6.33E-21 |
| Unigene77636  | Potri.006G138600.3  | 90.5157 | 36.3745 | 1.3152 | Up | 1.06E-32 | 6.95E-32 |
| Unigene51691  | Potri.008G179700.3  | 49.5175 | 19.9053 | 1.3148 | Up | 1.40E-56 | 1.56E-55 |
| Unigene45345  | Potri.004G124800.1  | 47.0536 | 18.9156 | 1.3147 | Up | 6.90E-35 | 4.76E-34 |
| Unigene21908  | Potri.018G092800.1  | 19.8118 | 7.9699  | 1.3137 | Up | 3.92E-40 | 3.08E-39 |
| Unigene565    | Potri.018G100200.1  | 42.1975 | 16.9806 | 1.3133 | Up | 1.26E-38 | 9.54E-38 |
| Unigene21228  | Potri.005G187200.1  | 6.4694  | 2.6035  | 1.3132 | Up | 1.70E-34 | 1.16E-33 |
| Unigene19382  | Potri.002G253800.3  | 8.0294  | 3.2312  | 1.3132 | Up | 6.54E-25 | 3.41E-24 |
| Unigene45643  | Potri.008G187900.1  | 40.7938 | 16.4188 | 1.313  | Up | 6.27E-55 | 6.76E-54 |
| Unigene112201 | Potri.013G044900.1  | 98.9992 | 39.8503 | 1.3128 | Up | 1.10E-36 | 8.00E-36 |
| Unigene42481  | Potri.011G129500.2  | 6.6964  | 2.697   | 1.312  | Up | 2.99E-19 | 1.30E-18 |
| Unigene50661  | Potri.010G127900.1  | 9.4885  | 3.8272  | 1.3099 | Up | 1.11E-12 | 3.63E-12 |
| Unigene32012  | Potri.001G243300.1  | 30.7233 | 12.3987 | 1.3091 | Up | 9.38E-51 | 9.31E-50 |
| Unigene43793  | Potri.002G182400.2  | 74.9244 | 30.2557 | 1.3082 | Up | 1.90E-39 | 1.47E-38 |
| Unigene37880  | Potri.007G034300.1  | 8.7032  | 3.5162  | 1.3075 | Up | 2.10E-04 | 3.88E-04 |
| Unigene41443  | Potri.001G020800.1  | 9.7835  | 3.9526  | 1.3075 | Up | 8.87E-06 | 1.88E-05 |
| Unigene112907 | Potri.015G038100.1  | 76.5543 | 30.9491 | 1.3066 | Up | 1.96E-29 | 1.17E-28 |
| Unigene49950  | Potri.001G455600.1  | 6.5957  | 2.6681  | 1.3057 | Up | 8.01E-16 | 3.02E-15 |
| Unigene47902  | Potri.002G021800.1  | 58.7287 | 23.7813 | 1.3042 | Up | 2.45E-41 | 1.98E-40 |
| Unigene87048  | Potri.002G196700.5  | 16.9653 | 6.8704  | 1.3041 | Up | 3.55E-09 | 9.66E-09 |
| Unigene29316  | Potri.001G234200.1  | 5.8371  | 2.3638  | 1.3041 | Up | 3.55E-09 | 9.66E-09 |
| Unigene12342  | Potri.018G086000.2  | 15.1708 | 6.1445  | 1.3039 | Up | 9.93E-09 | 2.63E-08 |
| Unigene6577   | Potri.008G010400.10 | 12.7042 | 5.1463  | 1.3037 | Up | 2.78E-08 | 7.16E-08 |
| Unigene42337  | Potri.001G082000.4  | 9.8068  | 3.9734  | 1.3034 | Up | 7.81E-08 | 1.95E-07 |
| Unigene11148  | Potri.004G234200.1  | 20.4047 | 8.2678  | 1.3033 | Up | 2.84E-20 | 1.28E-19 |
| Unigene27138  | Potri.008G091400.1  | 13.7653 | 5.5813  | 1.3024 | Up | 1.75E-06 | 3.96E-06 |
| Unigene54375  | Potri.008G191400.1  | 5.8189  | 2.3597  | 1.3021 | Up | 3.34E-11 | 1.02E-10 |
| Unigene35890  | Potri.018G131500.1  | 35.2894 | 14.3175 | 1.3015 | Up | 9.30E-19 | 3.95E-18 |
| Unigene41306  | Potri.005G260000.4  | 12.5457 | 5.0913  | 1.3011 | Up | 1.16E-13 | 3.97E-13 |
| Unigene52367  | Potri.001G302100.2  | 9.8904  | 4.0137  | 1.3011 | Up | 1.16E-13 | 3.97E-13 |
| Unigene34409  | Potri.T070200.1     | 3.1196  | 1.2664  | 1.3006 | Up | 4.05E-05 | 8.08E-05 |

|               |                    |          |         |        |    |           |           |
|---------------|--------------------|----------|---------|--------|----|-----------|-----------|
| Unigene9099   | Potri.006G099800.1 | 14.5405  | 5.9029  | 1.3006 | Up | 5.61E-09  | 1.51E-08  |
| Unigene60421  | Potri.007G131100.1 | 5.6378   | 2.2888  | 1.3005 | Up | 5.61E-09  | 1.51E-08  |
| Unigene17884  | Potri.003G146100.1 | 4.5234   | 1.8375  | 1.2997 | Up | 1.16E-04  | 2.21E-04  |
| Unigene68733  | Potri.005G099300.5 | 4.2688   | 1.7341  | 1.2996 | Up | 1.16E-04  | 2.21E-04  |
| Unigene92458  | Potri.007G099100.1 | 8.8957   | 3.615   | 1.2991 | Up | 1.24E-07  | 3.05E-07  |
| Unigene39473  | Potri.001G400800.2 | 43.253   | 17.5766 | 1.2991 | Up | 9.73E-73  | 1.43E-71  |
| Unigene13369  | Potri.001G318100.1 | 12.2208  | 4.9676  | 1.2987 | Up | 3.02E-19  | 1.31E-18  |
| Unigene58582  | Potri.010G206900.4 | 8.4844   | 3.4494  | 1.2985 | Up | 3.38E-04  | 6.11E-04  |
| Unigene54205  | Potri.002G136000.1 | 3.0367   | 1.2346  | 1.2985 | Up | 3.38E-04  | 6.11E-04  |
| Unigene63716  | Potri.002G024100.1 | 4.7068   | 1.9136  | 1.2985 | Up | 3.38E-04  | 6.11E-04  |
| Unigene38745  | Potri.001G137200.1 | 6.4604   | 2.6265  | 1.2985 | Up | 3.38E-04  | 6.11E-04  |
| Unigene12846  | Potri.010G105700.3 | 55.6371  | 22.6309 | 1.2978 | Up | 1.43E-54  | 1.53E-53  |
| Unigene64119  | Potri.014G113800.1 | 5.6323   | 2.291   | 1.2977 | Up | 9.82E-07  | 2.26E-06  |
| Unigene45512  | Potri.002G261400.1 | 30.1126  | 12.2516 | 1.2974 | Up | 1.72E-19  | 7.54E-19  |
| Unigene112953 | Potri.001G023100.2 | 177.6241 | 72.2686 | 1.2974 | Up | 2.24E-65  | 2.93E-64  |
| Unigene3617   | Potri.010G202400.7 | 47.8407  | 19.4686 | 1.2971 | Up | 6.27E-24  | 3.17E-23  |
| Unigene113424 | Potri.003G159200.2 | 46.2573  | 18.8269 | 1.2969 | Up | 1.31E-18  | 5.52E-18  |
| Unigene70174  | Potri.014G193500.5 | 6.5783   | 2.679   | 1.296  | Up | 2.73E-17  | 1.10E-16  |
| Unigene22979  | Potri.001G449000.1 | 25.253   | 10.2866 | 1.2957 | Up | 7.54E-17  | 2.97E-16  |
| Unigene46162  | Potri.009G162200.1 | 35.2883  | 14.38   | 1.2951 | Up | 6.09E-12  | 1.93E-11  |
| Unigene39038  | Potri.008G213300.1 | 94.1866  | 38.3892 | 1.2948 | Up | 2.64E-50  | 2.60E-49  |
| Unigene2489   | Potri.017G114300.1 | 7.0774   | 2.8851  | 1.2946 | Up | 1.69E-11  | 5.23E-11  |
| Unigene7387   | Potri.014G112900.1 | 4.6862   | 1.9103  | 1.2946 | Up | 2.25E-05  | 4.61E-05  |
| Unigene30950  | Potri.013G081100.1 | 14.1305  | 5.7603  | 1.2946 | Up | 1.96E-07  | 4.75E-07  |
| Unigene26600  | Potri.008G195100.3 | 35.3868  | 14.4255 | 1.2946 | Up | 1.63E-13  | 5.55E-13  |
| Unigene7912   | Potri.001G294600.1 | 23.6841  | 9.656   | 1.2944 | Up | 4.55E-35  | 3.16E-34  |
| Unigene45344  | Potri.009G118100.1 | 3.1241   | 1.2749  | 1.2931 | Up | 6.46E-05  | 1.26E-04  |
| Unigene66533  | Potri.012G077300.1 | 4.5087   | 1.84    | 1.293  | Up | 6.46E-05  | 1.26E-04  |
| Unigene30934  | Potri.002G140300.1 | 8.6076   | 3.5127  | 1.293  | Up | 6.46E-05  | 1.26E-04  |
| Unigene33896  | Potri.002G182500.3 | 134.134  | 54.7556 | 1.2926 | Up | 6.88E-151 | 2.49E-149 |
| Unigene108412 | Potri.010G158900.3 | 51.3545  | 20.9662 | 1.2924 | Up | 6.74E-17  | 2.66E-16  |
| Unigene93317  | Potri.009G071600.1 | 3.8563   | 1.5759  | 1.291  | Up | 1.87E-04  | 3.48E-04  |
| Unigene49400  | Potri.001G404600.1 | 7.5775   | 3.0966  | 1.291  | Up | 1.10E-07  | 2.72E-07  |
| Unigene3118   | Potri.001G166000.1 | 36.6196  | 14.9648 | 1.291  | Up | 7.85E-22  | 3.71E-21  |
| Unigene18008  | Potri.004G169200.1 | 5.8357   | 2.3861  | 1.2903 | Up | 2.06E-10  | 6.02E-10  |
| Unigene2588   | Potri.019G079000.2 | 74.4423  | 30.4416 | 1.2901 | Up | 1.09E-153 | 4.03E-152 |
| Unigene90176  | Potri.002G191400.1 | 10.7423  | 4.3936  | 1.2898 | Up | 3.10E-07  | 7.42E-07  |
| Unigene93685  | Potri.012G145600.1 | 4.7374   | 1.9382  | 1.2894 | Up | 1.26E-05  | 2.64E-05  |
| Unigene101711 | Potri.008G192000.3 | 8.7698   | 3.588   | 1.2894 | Up | 1.26E-05  | 2.64E-05  |

|               |                    |          |         |        |    |          |          |
|---------------|--------------------|----------|---------|--------|----|----------|----------|
| Unigene75047  | Potri.006G075900.1 | 13.4551  | 5.5048  | 1.2894 | Up | 1.26E-05 | 2.64E-05 |
| Unigene83898  | Potri.004G051100.3 | 10.7542  | 4.3998  | 1.2894 | Up | 1.26E-05 | 2.64E-05 |
| Unigene22233  | Potri.006G064000.1 | 32.9463  | 13.4839 | 1.2889 | Up | 2.98E-37 | 2.19E-36 |
| Unigene17586  | Potri.009G082200.6 | 12.8324  | 5.2536  | 1.2884 | Up | 1.60E-09 | 4.43E-09 |
| Unigene69843  | Potri.005G093300.1 | 4.4089   | 1.805   | 1.2884 | Up | 5.43E-04 | 9.59E-04 |
| Unigene50587  | Potri.001G204000.1 | 3.4032   | 1.3933  | 1.2884 | Up | 5.43E-04 | 9.59E-04 |
| Unigene110077 | Potri.002G104700.2 | 61.5443  | 25.2071 | 1.2878 | Up | 5.30E-21 | 2.44E-20 |
| Unigene32607  | Potri.008G037700.1 | 14.9015  | 6.1066  | 1.287  | Up | 5.32E-19 | 2.29E-18 |
| Unigene21230  | Potri.001G424900.1 | 6.1513   | 2.5212  | 1.2868 | Up | 5.46E-36 | 3.88E-35 |
| Unigene6421   | Potri.003G198800.1 | 31.5492  | 12.9346 | 1.2864 | Up | 6.41E-45 | 5.61E-44 |
| Unigene94912  | Potri.003G073400.1 | 13.0088  | 5.3332  | 1.2864 | Up | 1.74E-07 | 4.25E-07 |
| Unigene11877  | Potri.004G148300.1 | 31.2419  | 12.8109 | 1.2861 | Up | 2.52E-31 | 1.59E-30 |
| Unigene39605  | Potri.019G081400.1 | 10.7273  | 4.4002  | 1.2856 | Up | 3.59E-13 | 1.21E-12 |
| Unigene10909  | Potri.004G232900.1 | 22.0143  | 9.0307  | 1.2855 | Up | 4.67E-42 | 3.84E-41 |
| Unigene41316  | Potri.001G142200.1 | 85.1693  | 34.9493 | 1.2851 | Up | 5.96E-39 | 4.56E-38 |
| Unigene17816  | Potri.019G120500.1 | 6.0253   | 2.4729  | 1.2848 | Up | 1.03E-04 | 1.99E-04 |
| Unigene66791  | Potri.017G122400.1 | 6.3169   | 2.5926  | 1.2848 | Up | 1.03E-04 | 1.99E-04 |
| Unigene9737   | Potri.014G143200.2 | 3.2146   | 1.3194  | 1.2848 | Up | 1.03E-04 | 1.99E-04 |
| Unigene10707  | Potri.003G020800.1 | 10.3188  | 4.2351  | 1.2848 | Up | 7.37E-14 | 2.55E-13 |
| Unigene80337  | Potri.002G200500.2 | 19.0273  | 7.8093  | 1.2848 | Up | 3.50E-08 | 8.95E-08 |
| Unigene107255 | Potri.014G141500.1 | 111.5257 | 45.8111 | 1.2836 | Up | 2.05E-33 | 1.37E-32 |
| Unigene28429  | Potri.003G162200.1 | 7.1512   | 2.9377  | 1.2835 | Up | 7.05E-09 | 1.88E-08 |
| Unigene32054  | Potri.015G022700.1 | 56.4496  | 23.1966 | 1.283  | Up | 2.32E-88 | 4.25E-87 |
| Unigene9839   | Potri.006G092300.1 | 8.7493   | 3.5968  | 1.2825 | Up | 2.00E-05 | 4.12E-05 |
| Unigene39858  | Potri.012G099600.1 | 8.2578   | 3.3953  | 1.2822 | Up | 1.56E-12 | 5.09E-12 |
| Unigene22027  | Potri.015G110400.2 | 19.6375  | 8.0746  | 1.2821 | Up | 1.54E-19 | 6.76E-19 |
| Unigene58753  | Potri.005G215400.1 | 4.5792   | 1.8837  | 1.2815 | Up | 2.99E-04 | 5.45E-04 |
| Unigene31465  | Potri.003G145200.1 | 40.2332  | 16.5557 | 1.2811 | Up | 7.54E-17 | 2.97E-16 |
| Unigene70284  | Potri.T004400.1    | 5.261    | 2.1653  | 1.2808 | Up | 3.93E-06 | 8.63E-06 |
| Unigene114527 | Potri.004G041000.1 | 190.0763 | 78.2944 | 1.2796 | Up | 1.44E-74 | 2.17E-73 |
| Unigene47941  | Potri.002G029600.1 | 4.3882   | 1.8076  | 1.2796 | Up | 5.74E-05 | 1.13E-04 |
| Unigene10289  | Potri.002G117800.1 | 150.9941 | 62.2127 | 1.2792 | Up | 2.30E-59 | 2.71E-58 |
| Unigene9127   | Potri.004G116400.3 | 23.4206  | 9.6569  | 1.2781 | Up | 4.56E-10 | 1.31E-09 |
| Unigene104896 | Potri.008G018300.4 | 13.9664  | 5.7665  | 1.2762 | Up | 2.58E-10 | 7.49E-10 |
| Unigene57695  | Potri.006G128200.2 | 43.0968  | 17.7946 | 1.2761 | Up | 2.28E-22 | 1.09E-21 |
| Unigene85964  | Potri.013G076500.1 | 22.6822  | 9.3675  | 1.2758 | Up | 5.25E-11 | 1.59E-10 |
| Unigene25190  | Potri.009G137600.1 | 29.7076  | 12.2689 | 1.2758 | Up | 5.25E-11 | 1.59E-10 |
| Unigene39977  | Potri.006G053200.1 | 13.3009  | 5.4938  | 1.2756 | Up | 3.01E-21 | 1.40E-20 |
| Unigene13908  | Potri.008G034900.3 | 17.384   | 7.1824  | 1.2752 | Up | 2.19E-12 | 7.08E-12 |



|               |                    |          |         |        |    |          |          |
|---------------|--------------------|----------|---------|--------|----|----------|----------|
| Unigene47488  | Potri.006G071000.1 | 9.5539   | 3.948   | 1.275  | Up | 3.19E-05 | 6.42E-05 |
| Unigene51914  | Potri.018G057600.6 | 6.5265   | 2.6981  | 1.2744 | Up | 1.46E-10 | 4.30E-10 |
| Unigene69323  | Potri.T125700.2    | 5.9946   | 2.479   | 1.2739 | Up | 1.23E-06 | 2.81E-06 |
| Unigene53572  | Potri.018G114500.6 | 19.3405  | 7.9998  | 1.2736 | Up | 2.46E-07 | 5.92E-07 |
| Unigene32671  | Potri.001G050600.1 | 10.3154  | 4.2688  | 1.2729 | Up | 1.94E-17 | 7.85E-17 |
| Unigene72673  | Potri.010G056600.1 | 31.7405  | 13.1375 | 1.2726 | Up | 8.26E-11 | 2.47E-10 |
| Unigene33687  | Potri.013G131300.1 | 14.0058  | 5.7975  | 1.2725 | Up | 1.68E-11 | 5.21E-11 |
| Unigene94588  | Potri.004G189900.1 | 45.4104  | 18.8125 | 1.2713 | Up | 1.22E-47 | 1.14E-46 |
| Unigene8614   | Potri.016G141200.3 | 4.6291   | 1.9181  | 1.2711 | Up | 4.80E-04 | 8.50E-04 |
| Unigene59587  | Potri.012G044300.4 | 3.0836   | 1.2777  | 1.2711 | Up | 4.80E-04 | 8.51E-04 |
| Unigene111544 | Potri.016G120100.2 | 93.2489  | 38.6396 | 1.271  | Up | 2.98E-32 | 1.93E-31 |
| Unigene51789  | Potri.016G084500.2 | 14.3918  | 5.9636  | 1.271  | Up | 2.30E-10 | 6.69E-10 |
| Unigene3773   | Potri.007G126900.2 | 3.3099   | 1.3715  | 1.271  | Up | 4.80E-04 | 8.51E-04 |
| Unigene87914  | Potri.005G223600.1 | 7.4829   | 3.1007  | 1.271  | Up | 9.16E-05 | 1.76E-04 |
| Unigene52537  | Potri.004G132900.1 | 6.9271   | 2.8704  | 1.271  | Up | 4.80E-04 | 8.51E-04 |
| Unigene34540  | Potri.001G107500.1 | 12.0393  | 4.9887  | 1.271  | Up | 2.40E-21 | 1.12E-20 |
| Unigene29807  | Potri.010G126700.3 | 70.6082  | 29.2707 | 1.2704 | Up | 1.10E-25 | 5.89E-25 |
| Unigene118265 | Potri.014G052500.3 | 147.6956 | 61.2301 | 1.2703 | Up | 7.47E-89 | 1.38E-87 |
| Unigene113    | Potri.008G018200.1 | 13.9505  | 5.7861  | 1.2697 | Up | 3.89E-46 | 3.50E-45 |
| Unigene43262  | Potri.006G216500.3 | 21.418   | 8.8878  | 1.2689 | Up | 2.70E-52 | 2.76E-51 |
| Unigene37304  | Potri.009G043300.1 | 3.983    | 1.6539  | 1.268  | Up | 1.95E-06 | 4.40E-06 |
| Unigene23899  | Potri.014G074300.1 | 6.1085   | 2.5369  | 1.2678 | Up | 7.36E-11 | 2.21E-10 |
| Unigene52710  | Potri.010G243100.2 | 34.5045  | 14.3296 | 1.2678 | Up | 2.84E-20 | 1.27E-19 |
| Unigene69106  | Potri.006G248300.1 | 10.4485  | 4.3392  | 1.2678 | Up | 7.36E-11 | 2.21E-10 |
| Unigene24567  | Potri.006G004400.5 | 10.2512  | 4.258   | 1.2675 | Up | 9.91E-06 | 2.09E-05 |
| Unigene42475  | Potri.002G074100.1 | 6.0133   | 2.4988  | 1.2669 | Up | 7.80E-20 | 3.45E-19 |
| Unigene36411  | Potri.014G153400.2 | 57.4983  | 23.8975 | 1.2667 | Up | 8.77E-26 | 4.70E-25 |
| Unigene13095  | Potri.006G149700.2 | 9.99     | 4.1531  | 1.2663 | Up | 4.17E-11 | 1.26E-10 |
| Unigene87836  | Potri.014G053500.2 | 13.2054  | 5.4911  | 1.266  | Up | 2.18E-07 | 5.28E-07 |
| Unigene28367  | Potri.001G112600.1 | 35.8327  | 14.9001 | 1.266  | Up | 2.14E-19 | 9.33E-19 |
| Unigene93645  | Potri.007G046400.4 | 3.4627   | 1.4399  | 1.2659 | Up | 2.65E-04 | 4.84E-04 |
| Unigene37955  | Potri.013G008900.1 | 8.5619   | 3.5619  | 1.2653 | Up | 1.10E-06 | 2.51E-06 |
| Unigene33242  | Potri.004G093900.1 | 15.9396  | 6.6315  | 1.2652 | Up | 1.22E-19 | 5.36E-19 |
| Unigene19155  | Potri.008G058800.3 | 21.462   | 8.93    | 1.2651 | Up | 1.17E-16 | 4.59E-16 |
| Unigene83     | Potri.004G087800.1 | 10.2974  | 4.2859  | 1.2646 | Up | 5.18E-32 | 3.32E-31 |
| Unigene114903 | Potri.008G174100.2 | 141.2821 | 58.8323 | 1.2639 | Up | 3.16E-56 | 3.50E-55 |
| Unigene114711 | Potri.001G404100.1 | 76.498   | 31.8559 | 1.2639 | Up | 6.79E-31 | 4.23E-30 |
| Unigene4229   | Potri.001G011800.1 | 52.978   | 22.0678 | 1.2635 | Up | 2.38E-23 | 1.18E-22 |
| Unigene47101  | Potri.017G036100.1 | 7.1376   | 2.9767  | 1.2617 | Up | 1.46E-04 | 2.76E-04 |

|               |                    |          |         |        |    |           |           |
|---------------|--------------------|----------|---------|--------|----|-----------|-----------|
| Unigene93692  | Potri.009G058200.1 | 3.706    | 1.5456  | 1.2617 | Up | 1.46E-04  | 2.76E-04  |
| Unigene38563  | Potri.003G182300.1 | 10.1811  | 4.246   | 1.2617 | Up | 8.78E-13  | 2.90E-12  |
| Unigene10655  | Potri.009G032800.1 | 12.0388  | 5.0232  | 1.261  | Up | 1.82E-10  | 5.33E-10  |
| Unigene11108  | Potri.014G174700.1 | 9.5069   | 3.967   | 1.2609 | Up | 2.99E-25  | 1.58E-24  |
| Unigene8001   | Potri.014G196900.3 | 6.8755   | 2.8704  | 1.2602 | Up | 1.58E-05  | 3.27E-05  |
| Unigene40747  | Potri.006G236400.2 | 4.4076   | 1.8401  | 1.2602 | Up | 1.58E-05  | 3.27E-05  |
| Unigene29744  | Potri.001G057300.1 | 7.8941   | 3.2956  | 1.2602 | Up | 1.58E-05  | 3.27E-05  |
| Unigene22130  | Potri.019G046500.1 | 34.2579  | 14.304  | 1.26   | Up | 3.55E-81  | 5.92E-80  |
| Unigene40460  | Potri.001G137200.1 | 8.5011   | 3.5499  | 1.2599 | Up | 3.89E-08  | 9.92E-08  |
| Unigene2479   | Potri.011G106600.7 | 9.9834   | 4.1692  | 1.2598 | Up | 1.92E-17  | 7.77E-17  |
| Unigene77759  | Potri.002G027200.1 | 15.6882  | 6.5538  | 1.2593 | Up | 1.73E-06  | 3.92E-06  |
| Unigene43388  | Potri.012G053700.2 | 47.2823  | 19.7536 | 1.2592 | Up | 9.60E-87  | 1.72E-85  |
| Unigene20970  | Potri.007G063100.3 | 5.5783   | 2.3322  | 1.2581 | Up | 8.10E-05  | 1.57E-04  |
| Unigene41479  | Potri.002G091000.2 | 93.8754  | 39.2507 | 1.258  | Up | 8.94E-52  | 9.06E-51  |
| Unigene20657  | Potri.005G167400.2 | 5.4937   | 2.2974  | 1.2578 | Up | 2.50E-09  | 6.86E-09  |
| Unigene39163  | Potri.014G156900.1 | 80.431   | 33.6404 | 1.2576 | Up | 1.03E-35  | 7.30E-35  |
| Unigene81596  | Potri.009G140000.1 | 12.4332  | 5.2004  | 1.2575 | Up | 8.79E-06  | 1.86E-05  |
| Unigene23733  | Potri.002G065900.1 | 3.7609   | 1.5731  | 1.2575 | Up | 8.79E-06  | 1.86E-05  |
| Unigene44064  | Potri.001G442800.1 | 31.5401  | 13.1981 | 1.2569 | Up | 2.37E-19  | 1.03E-18  |
| Unigene41864  | Potri.007G031600.1 | 31.083   | 13.0087 | 1.2566 | Up | 6.03E-15  | 2.19E-14  |
| Unigene1388   | Potri.005G140000.1 | 49.8458  | 20.8638 | 1.2565 | Up | 1.46E-69  | 2.04E-68  |
| Unigene20963  | Potri.004G217700.2 | 42.458   | 17.7719 | 1.2564 | Up | 3.92E-40  | 3.08E-39  |
| Unigene40666  | Potri.016G140200.3 | 13.8     | 5.7772  | 1.2562 | Up | 1.62E-10  | 4.75E-10  |
| Unigene68613  | Potri.006G273400.1 | 3.3612   | 1.4082  | 1.2551 | Up | 4.50E-05  | 8.95E-05  |
| Unigene19384  | Potri.018G126600.1 | 6.8509   | 2.8704  | 1.255  | Up | 6.13E-08  | 1.54E-07  |
| Unigene9962   | Potri.001G348500.2 | 72.9258  | 30.5708 | 1.2543 | Up | 3.18E-55  | 3.46E-54  |
| Unigene50777  | Potri.019G081500.1 | 6.083    | 2.5508  | 1.2538 | Up | 4.50E-10  | 1.29E-09  |
| Unigene1686   | Potri.014G095500.1 | 64.3127  | 26.9829 | 1.2531 | Up | 1.94E-38  | 1.47E-37  |
| Unigene26792  | Potri.010G126700.3 | 142.891  | 59.9849 | 1.2522 | Up | 9.50E-69  | 1.31E-67  |
| Unigene117222 | Potri.004G199600.3 | 216.7837 | 91.0178 | 1.252  | Up | 1.09E-105 | 2.50E-104 |
| Unigene56378  | Potri.003G000300.1 | 3.2994   | 1.3857  | 1.2516 | Up | 2.34E-04  | 4.30E-04  |
| Unigene60866  | Potri.002G215700.4 | 4.8208   | 2.0247  | 1.2516 | Up | 1.72E-07  | 4.19E-07  |
| Unigene30873  | Potri.011G114600.1 | 6.29     | 2.6429  | 1.2509 | Up | 1.54E-06  | 3.49E-06  |
| Unigene29245  | Potri.003G043700.4 | 17.025   | 7.1542  | 1.2508 | Up | 7.20E-14  | 2.50E-13  |
| Unigene35001  | Potri.008G119800.1 | 24.6835  | 10.3746 | 1.2505 | Up | 2.76E-22  | 1.32E-21  |
| Unigene116106 | Potri.001G117400.1 | 137.2091 | 57.6684 | 1.2505 | Up | 2.12E-59  | 2.49E-58  |
| Unigene69351  | Potri.TI04200.1    | 5.939    | 2.4969  | 1.2501 | Up | 1.39E-05  | 2.92E-05  |
| Unigene30291  | Potri.015G038100.1 | 60.3664  | 25.3801 | 1.25   | Up | 1.98E-20  | 8.93E-20  |
| Unigene45357  | Potri.017G079000.1 | 65.4778  | 27.5506 | 1.2489 | Up | 5.44E-63  | 6.82E-62  |

|               |                    |          |         |        |    |           |           |
|---------------|--------------------|----------|---------|--------|----|-----------|-----------|
| Unigene69477  | Potri.017G074800.1 | 7.1119   | 2.9925  | 1.2489 | Up | 1.99E-13  | 6.76E-13  |
| Unigene9645   | Potri.006G232100.3 | 16.9905  | 7.1504  | 1.2486 | Up | 5.44E-08  | 1.37E-07  |
| Unigene27735  | Potri.010G201300.2 | 65.7313  | 27.6766 | 1.2479 | Up | 3.34E-38  | 2.51E-37  |
| Unigene9335   | Potri.003G154600.1 | 5.3343   | 2.246   | 1.2479 | Up | 7.48E-15  | 2.71E-14  |
| Unigene20587  | Potri.006G000800.1 | 10.1549  | 4.278   | 1.2472 | Up | 1.97E-09  | 5.44E-09  |
| Unigene12417  | Potri.005G072500.1 | 31.3953  | 13.2268 | 1.2471 | Up | 1.26E-18  | 5.34E-18  |
| Unigene92341  | Potri.012G002500.1 | 14.2056  | 5.985   | 1.247  | Up | 1.28E-10  | 3.77E-10  |
| Unigene33184  | Potri.007G065000.3 | 18.8425  | 7.9436  | 1.2461 | Up | 1.85E-21  | 8.63E-21  |
| Unigene30296  | Potri.006G044600.5 | 11.7519  | 4.9543  | 1.2461 | Up | 7.16E-05  | 1.40E-04  |
| Unigene42415  | Potri.001G094200.1 | 28.5412  | 12.0355 | 1.2457 | Up | 5.66E-110 | 1.37E-108 |
| Unigene94174  | Potri.010G191300.1 | 9.0496   | 3.8173  | 1.2453 | Up | 4.09E-11  | 1.24E-10  |
| Unigene21415  | Potri.010G004200.5 | 21.2196  | 8.951   | 1.2453 | Up | 1.04E-87  | 1.90E-86  |
| Unigene53110  | Potri.015G004100.1 | 78.7435  | 33.2198 | 1.2451 | Up | 1.05E-25  | 5.63E-25  |
| Unigene46627  | Potri.008G132000.1 | 8.0329   | 3.3891  | 1.245  | Up | 9.73E-09  | 2.58E-08  |
| Unigene114705 | Potri.003G052800.1 | 130.2093 | 54.9441 | 1.2448 | Up | 3.01E-50  | 2.95E-49  |
| Unigene117794 | Potri.016G028900.1 | 49.3442  | 20.8251 | 1.2446 | Up | 2.32E-27  | 1.30E-26  |
| Unigene8916   | Potri.002G029600.1 | 72.9738  | 30.8174 | 1.2436 | Up | 4.77E-47  | 4.38E-46  |
| Unigene241    | Potri.001G072200.1 | 51.2038  | 21.6264 | 1.2435 | Up | 3.61E-56  | 4.00E-55  |
| Unigene44458  | Potri.004G044300.1 | 38.4596  | 16.2471 | 1.2432 | Up | 2.05E-23  | 1.02E-22  |
| Unigene946    | Potri.001G141600.1 | 17.3608  | 7.334   | 1.2432 | Up | 2.05E-23  | 1.02E-22  |
| Unigene769    | Potri.001G085700.1 | 10.6624  | 4.5056  | 1.2427 | Up | 6.92E-16  | 2.62E-15  |
| Unigene53904  | Potri.009G032800.1 | 57.8813  | 24.4679 | 1.2422 | Up | 1.07E-38  | 8.11E-38  |
| Unigene27725  | Potri.015G013900.2 | 7.5945   | 3.2107  | 1.2421 | Up | 2.21E-05  | 4.53E-05  |
| Unigene1889   | Potri.011G116200.2 | 12.3291  | 5.2123  | 1.2421 | Up | 1.57E-13  | 5.37E-13  |
| Unigene107937 | Potri.002G014700.1 | 91.7861  | 38.8063 | 1.242  | Up | 5.65E-27  | 3.14E-26  |
| Unigene92886  | Potri.007G031500.1 | 7.7647   | 3.2836  | 1.2417 | Up | 7.64E-07  | 1.77E-06  |
| Unigene19895  | Potri.005G020300.2 | 88.4934  | 37.423  | 1.2416 | Up | 1.36E-55  | 1.49E-54  |
| Unigene47730  | Potri.003G159200.2 | 25.7891  | 10.9097 | 1.2411 | Up | 1.84E-19  | 8.04E-19  |
| Unigene7916   | Potri.015G091800.4 | 39.912   | 16.8872 | 1.2409 | Up | 4.76E-57  | 5.35E-56  |
| Unigene28573  | Potri.010G033500.1 | 8.256    | 3.4944  | 1.2404 | Up | 4.28E-07  | 1.02E-06  |
| Unigene13954  | Potri.001G301900.2 | 11.868   | 5.0232  | 1.2404 | Up | 7.65E-13  | 2.53E-12  |
| Unigene66739  | Potri.001G281300.5 | 4.0324   | 1.7067  | 1.2404 | Up | 3.74E-04  | 6.74E-04  |
| Unigene14995  | Potri.014G052500.2 | 121.1867 | 51.3036 | 1.2401 | Up | 5.02E-43  | 4.22E-42  |
| Unigene97033  | Potri.008G100400.4 | 4.262    | 1.805   | 1.2395 | Up | 8.63E-09  | 2.29E-08  |
| Unigene16488  | Potri.014G147900.3 | 11.2531  | 4.7677  | 1.239  | Up | 6.88E-06  | 1.48E-05  |
| Unigene113759 | Potri.009G140000.1 | 72.8709  | 30.8759 | 1.2389 | Up | 4.47E-27  | 2.49E-26  |
| Unigene23714  | Potri.010G187900.2 | 41.8353  | 17.7272 | 1.2388 | Up | 3.25E-45  | 2.87E-44  |
| Unigene22003  | Potri.010G205000.1 | 28.1866  | 11.949  | 1.2381 | Up | 1.02E-41  | 8.31E-41  |
| Unigene41162  | Potri.002G091000.2 | 79.4471  | 33.6831 | 1.238  | Up | 5.81E-42  | 4.77E-41  |

|               |                     |          |         |        |    |          |          |
|---------------|---------------------|----------|---------|--------|----|----------|----------|
| Unigene51678  | Potri.003G067900.2  | 6.0037   | 2.546   | 1.2376 | Up | 3.85E-06 | 8.46E-06 |
| Unigene23615  | Potri.005G187200.1  | 4.2966   | 1.8225  | 1.2373 | Up | 2.55E-14 | 9.01E-14 |
| Unigene40183  | Potri.014G028200.1  | 9.0437   | 3.8368  | 1.237  | Up | 3.22E-11 | 9.83E-11 |
| Unigene63822  | Potri.001G101600.2  | 5.5949   | 2.3746  | 1.2364 | Up | 1.14E-04 | 2.17E-04 |
| Unigene8358   | Potri.001G464300.1  | 23.5166  | 9.9834  | 1.2361 | Up | 1.00E-16 | 3.93E-16 |
| Unigene59275  | Potri.013G135600.1  | 3.9884   | 1.6946  | 1.2349 | Up | 6.32E-05 | 1.24E-04 |
| Unigene34060  | Potri.003G141400.1  | 15.047   | 6.3931  | 1.2349 | Up | 8.54E-16 | 3.22E-15 |
| Unigene107515 | Potri.004G158300.1  | 115.2389 | 48.982  | 1.2343 | Up | 1.10E-32 | 7.22E-32 |
| Unigene11838  | Potri.003G067900.2  | 25.057   | 10.6532 | 1.2339 | Up | 7.33E-39 | 5.59E-38 |
| Unigene38241  | Potri.009G014700.2  | 5.7307   | 2.4371  | 1.2335 | Up | 3.79E-07 | 9.01E-07 |
| Unigene7336   | Potri.001G376600.1  | 9.7919   | 4.1643  | 1.2335 | Up | 4.31E-09 | 1.17E-08 |
| Unigene35884  | Potri.001G449000.1  | 36.757   | 15.6357 | 1.2332 | Up | 4.14E-15 | 1.52E-14 |
| Unigene42823  | Potri.013G025400.1  | 22.0472  | 9.3843  | 1.2323 | Up | 4.69E-32 | 3.02E-31 |
| Unigene24938  | Potri.003G116600.1  | 9.3828   | 3.9936  | 1.2323 | Up | 1.96E-05 | 4.02E-05 |
| Unigene16848  | Potri.014G149000.1  | 24.0282  | 10.2344 | 1.2313 | Up | 4.38E-10 | 1.26E-09 |
| Unigene115512 | Potri.006G128600.5  | 44.7338  | 19.0569 | 1.2311 | Up | 5.54E-19 | 2.38E-18 |
| Unigene51774  | Potri.013G018400.1  | 89.5657  | 38.1696 | 1.2305 | Up | 9.59E-40 | 7.47E-39 |
| Unigene197    | Potri.003G091000.2  | 44.39    | 18.9371 | 1.229  | Up | 1.60E-75 | 2.45E-74 |
| Unigene36367  | Potri.001G063100.1  | 8.9911   | 3.8363  | 1.2288 | Up | 1.90E-06 | 4.29E-06 |
| Unigene23000  | Potri.006G210200.1  | 4.1057   | 1.7526  | 1.2281 | Up | 1.07E-06 | 2.44E-06 |
| Unigene55898  | Potri.018G081800.6  | 4.6424   | 1.9834  | 1.2269 | Up | 3.29E-04 | 5.96E-04 |
| Unigene37730  | Potri.010G118000.1  | 35.0092  | 14.9813 | 1.2246 | Up | 4.08E-12 | 1.30E-11 |
| Unigene38826  | Potri.019G042500.1  | 7.0358   | 3.0113  | 1.2243 | Up | 5.58E-05 | 1.10E-04 |
| Unigene32442  | Potri.010G211600.7  | 17.7578  | 7.6002  | 1.2243 | Up | 3.03E-23 | 1.50E-22 |
| Unigene13402  | Potri.010G066400.3  | 12.5046  | 5.3519  | 1.2243 | Up | 5.30E-16 | 2.02E-15 |
| Unigene46023  | Potri.006G064200.1  | 68.0632  | 29.1373 | 1.224  | Up | 1.94E-31 | 1.22E-30 |
| Unigene48151  | Potri.014G138200.2  | 51.1382  | 21.898  | 1.2236 | Up | 5.90E-25 | 3.08E-24 |
| Unigene4301   | Potri.001G271300.1  | 24.2904  | 10.4022 | 1.2235 | Up | 2.39E-13 | 8.09E-13 |
| Unigene6892   | Potri.002G217800.1  | 6.2166   | 2.6629  | 1.2231 | Up | 1.73E-05 | 3.56E-05 |
| Unigene44023  | Potri.003G092200.1  | 80.6853  | 34.5649 | 1.223  | Up | 2.38E-47 | 2.20E-46 |
| Unigene91790  | Potri.014G059000.3  | 15.8035  | 6.7738  | 1.2222 | Up | 1.10E-10 | 3.26E-10 |
| Unigene32359  | Potri.004G087000.3  | 40.3729  | 17.3082 | 1.2219 | Up | 1.78E-58 | 2.05E-57 |
| Unigene94399  | Potri.006G240900.3  | 3.6554   | 1.5672  | 1.2218 | Up | 3.01E-06 | 6.65E-06 |
| Unigene25197  | Potri.013G112900.3  | 9.7262   | 4.1711  | 1.2214 | Up | 1.68E-06 | 3.81E-06 |
| Unigene23029  | Potri.005G124700.1  | 6.885    | 2.9527  | 1.2214 | Up | 1.68E-06 | 3.81E-06 |
| Unigene27670  | Potri.011G118100.1  | 13.8419  | 5.9387  | 1.2208 | Up | 1.16E-12 | 3.80E-12 |
| Unigene34134  | Potri.003G222800.3  | 8.3794   | 3.5951  | 1.2208 | Up | 1.16E-12 | 3.80E-12 |
| Unigene4859   | Potri.001G372100.11 | 19.2767  | 8.2734  | 1.2203 | Up | 1.67E-07 | 4.06E-07 |
| Unigene113223 | Potri.009G041800.1  | 119.8914 | 51.5072 | 1.2189 | Up | 2.46E-41 | 2.00E-40 |

|               |                    |          |         |        |    |          |          |
|---------------|--------------------|----------|---------|--------|----|----------|----------|
| Unigene34166  | Potri.018G081000.3 | 28.8735  | 12.4193 | 1.2172 | Up | 4.66E-53 | 4.84E-52 |
| Unigene13350  | Potri.013G024600.3 | 18.3655  | 7.9023  | 1.2167 | Up | 3.27E-33 | 2.17E-32 |
| Unigene21679  | Potri.010G123600.1 | 17.1924  | 7.3983  | 1.2165 | Up | 1.20E-35 | 8.45E-35 |
| Unigene112162 | Potri.001G117400.1 | 156.3473 | 67.3102 | 1.2159 | Up | 9.90E-51 | 9.81E-50 |
| Unigene32344  | Potri.011G061700.1 | 45.9433  | 19.7889 | 1.2152 | Up | 2.53E-49 | 2.43E-48 |
| Unigene47955  | Potri.015G092700.2 | 5.4129   | 2.3327  | 1.2144 | Up | 5.25E-04 | 9.29E-04 |
| Unigene25676  | Potri.010G242200.1 | 3.3008   | 1.4225  | 1.2144 | Up | 2.89E-04 | 5.28E-04 |
| Unigene49227  | Potri.010G164400.1 | 13.6922  | 5.9006  | 1.2144 | Up | 1.48E-08 | 3.87E-08 |
| Unigene110418 | Potri.009G054600.1 | 10.0358  | 4.3249  | 1.2144 | Up | 2.89E-04 | 5.28E-04 |
| Unigene9621   | Potri.006G025900.2 | 7.0497   | 3.0381  | 1.2144 | Up | 5.25E-04 | 9.29E-04 |
| Unigene91521  | Potri.004G118400.1 | 5.7046   | 2.4584  | 1.2144 | Up | 1.60E-04 | 2.99E-04 |
| Unigene118128 | Potri.003G198100.1 | 20.0633  | 8.6462  | 1.2144 | Up | 2.84E-12 | 9.13E-12 |
| Unigene14262  | Potri.003G052200.2 | 6.8861   | 2.9675  | 1.2144 | Up | 2.89E-04 | 5.28E-04 |
| Unigene37927  | Potri.001G360800.1 | 9.2152   | 3.9712  | 1.2144 | Up | 1.49E-06 | 3.37E-06 |
| Unigene15057  | Potri.001G043500.1 | 4.4759   | 1.9289  | 1.2144 | Up | 2.89E-04 | 5.28E-04 |
| Unigene6063   | Potri.001G180100.1 | 75.5394  | 32.5872 | 1.2129 | Up | 4.48E-25 | 2.35E-24 |
| Unigene31903  | Potri.003G091000.2 | 16.113   | 6.9528  | 1.2126 | Up | 8.57E-58 | 9.78E-57 |
| Unigene42463  | Potri.017G057200.1 | 4.09     | 1.7669  | 1.2109 | Up | 1.84E-21 | 8.60E-21 |
| Unigene35165  | Potri.004G003200.2 | 16.9267  | 7.3163  | 1.2101 | Up | 1.32E-09 | 3.69E-09 |
| Unigene118522 | Potri.004G199600.4 | 86.9494  | 37.5955 | 1.2096 | Up | 2.06E-52 | 2.11E-51 |
| Unigene50600  | Potri.005G070100.3 | 57.571   | 24.8974 | 1.2093 | Up | 5.19E-36 | 3.69E-35 |
| Unigene23414  | Potri.006G123800.1 | 32.9405  | 14.2489 | 1.209  | Up | 8.07E-34 | 5.43E-33 |
| Unigene25274  | Potri.001G148800.1 | 19.1577  | 8.2872  | 1.209  | Up | 7.32E-08 | 1.83E-07 |
| Unigene11712  | Potri.002G256100.1 | 32.4464  | 14.0424 | 1.2083 | Up | 3.71E-58 | 4.27E-57 |
| Unigene27080  | Potri.014G141500.4 | 43.5161  | 18.8368 | 1.208  | Up | 7.69E-18 | 3.16E-17 |
| Unigene38736  | Potri.002G087200.3 | 8.0303   | 3.4768  | 1.2077 | Up | 1.31E-06 | 2.99E-06 |
| Unigene30581  | Potri.016G115300.1 | 8.9131   | 3.862   | 1.2066 | Up | 7.49E-06 | 1.61E-05 |
| Unigene44275  | Potri.014G047600.5 | 5.3955   | 2.3378  | 1.2066 | Up | 7.49E-06 | 1.61E-05 |
| Unigene67457  | Potri.006G085400.2 | 6.6055   | 2.8621  | 1.2066 | Up | 2.11E-10 | 6.16E-10 |
| Unigene24280  | Potri.005G170400.1 | 13.1587  | 5.7027  | 1.2063 | Up | 2.11E-14 | 7.49E-14 |
| Unigene45938  | Potri.005G251100.2 | 4.3139   | 1.8704  | 1.2056 | Up | 2.41E-05 | 4.91E-05 |
| Unigene28133  | Potri.001G127600.1 | 8.4602   | 3.6688  | 1.2054 | Up | 3.67E-09 | 9.98E-09 |
| Unigene77034  | Potri.017G017000.1 | 12.5418  | 5.4399  | 1.2051 | Up | 4.33E-05 | 8.61E-05 |
| Unigene74807  | Potri.004G197600.1 | 23.8923  | 10.3704 | 1.2041 | Up | 3.64E-08 | 9.31E-08 |
| Unigene38333  | Potri.006G150500.5 | 3.9605   | 1.7195  | 1.2037 | Up | 1.41E-04 | 2.66E-04 |
| Unigene17034  | Potri.004G148300.1 | 8.7484   | 3.7993  | 1.2033 | Up | 1.15E-07 | 2.84E-07 |
| Unigene94099  | Potri.005G218900.2 | 3.1167   | 1.3539  | 1.2029 | Up | 2.54E-04 | 4.66E-04 |
| Unigene2895   | Potri.002G251400.1 | 28.9663  | 12.5848 | 1.2027 | Up | 7.75E-40 | 6.05E-39 |
| Unigene920    | Potri.007G134800.1 | 16.0743  | 6.9846  | 1.2025 | Up | 5.59E-19 | 2.40E-18 |

|               |                    |          |          |        |    |          |          |
|---------------|--------------------|----------|----------|--------|----|----------|----------|
| Unigene11862  | Potri.T043800.1    | 15.9933  | 6.9506   | 1.2023 | Up | 9.75E-16 | 3.67E-15 |
| Unigene114425 | Potri.010G004600.1 | 23.7109  | 10.3077  | 1.2018 | Up | 1.03E-09 | 2.90E-09 |
| Unigene40986  | Potri.008G211100.1 | 19.2791  | 8.3822   | 1.2016 | Up | 9.40E-18 | 3.84E-17 |
| Unigene22902  | Potri.002G090000.5 | 18.6165  | 8.0943   | 1.2016 | Up | 5.32E-15 | 1.94E-14 |
| Unigene52422  | Potri.010G090800.1 | 13.202   | 5.7407   | 1.2015 | Up | 1.83E-09 | 5.07E-09 |
| Unigene44242  | Potri.002G011400.1 | 111.7375 | 48.6041  | 1.201  | Up | 5.63E-68 | 7.66E-67 |
| Unigene12486  | Potri.001G071700.1 | 70.9066  | 30.8452  | 1.2009 | Up | 5.20E-65 | 6.75E-64 |
| Unigene14507  | Potri.004G042000.1 | 13.6911  | 5.9569   | 1.2006 | Up | 5.76E-09 | 1.54E-08 |
| Unigene5075   | Potri.002G032500.1 | 14.7118  | 6.404    | 1.1999 | Up | 3.69E-06 | 8.13E-06 |
| Unigene21285  | Potri.002G236800.1 | 33.8541  | 14.753   | 1.1983 | Up | 6.92E-93 | 1.35E-91 |
| Unigene109877 | Potri.010G199200.3 | 44.8279  | 19.5396  | 1.198  | Up | 4.53E-14 | 1.59E-13 |
| Unigene37489  | Potri.012G079700.4 | 103.1494 | 44.981   | 1.1973 | Up | 1.15E-33 | 7.72E-33 |
| Unigene36258  | Potri.010G029500.1 | 26.3163  | 11.4815  | 1.1966 | Up | 4.38E-13 | 1.47E-12 |
| Unigene55996  | Potri.012G110900.1 | 3.8368   | 1.6744   | 1.1963 | Up | 3.81E-05 | 7.62E-05 |
| Unigene113358 | Potri.001G072200.1 | 62.9522  | 27.4784  | 1.196  | Up | 6.19E-22 | 2.93E-21 |
| Unigene21687  | Potri.014G073000.1 | 49.383   | 21.5577  | 1.1958 | Up | 4.97E-62 | 6.12E-61 |
| Unigene22090  | Potri.001G248400.1 | 9.4909   | 4.1437   | 1.1956 | Up | 6.52E-18 | 2.68E-17 |
| Unigene33073  | Potri.010G233100.1 | 21.3202  | 9.3095   | 1.1954 | Up | 5.68E-25 | 2.97E-24 |
| Unigene67896  | Potri.004G135500.2 | 6.1611   | 2.691    | 1.195  | Up | 6.86E-05 | 1.34E-04 |
| Unigene29616  | Potri.001G060800.2 | 3.627    | 1.5842   | 1.195  | Up | 6.86E-05 | 1.34E-04 |
| Unigene11114  | Potri.009G018600.3 | 5.5821   | 2.4399   | 1.194  | Up | 2.91E-23 | 1.44E-22 |
| Unigene30598  | Potri.001G233400.1 | 42.9219  | 18.7629  | 1.1938 | Up | 1.93E-16 | 7.48E-16 |
| Unigene109992 | Potri.008G174100.1 | 317.3017 | 138.7215 | 1.1937 | Up | 7.98E-90 | 1.49E-88 |
| Unigene93095  | Potri.002G084300.2 | 4.8196   | 2.1071   | 1.1937 | Up | 1.24E-04 | 2.35E-04 |
| Unigene116839 | Potri.018G069200.6 | 106.7616 | 46.6822  | 1.1934 | Up | 6.00E-47 | 5.49E-46 |
| Unigene33487  | Potri.T104200.1    | 11.9976  | 5.2471   | 1.1932 | Up | 3.25E-06 | 7.18E-06 |
| Unigene34171  | Potri.007G142100.1 | 24.1446  | 10.5635  | 1.1926 | Up | 1.25E-29 | 7.54E-29 |
| Unigene2822   | Potri.010G171400.1 | 16.8111  | 7.3579   | 1.192  | Up | 2.06E-30 | 1.27E-29 |
| Unigene32870  | Potri.010G209900.1 | 48.4546  | 21.2193  | 1.1913 | Up | 3.57E-54 | 3.79E-53 |
| Unigene31728  | Potri.006G022100.1 | 90.6666  | 39.7215  | 1.1907 | Up | 1.71E-31 | 1.08E-30 |
| Unigene70412  | Potri.002G104700.2 | 7.0983   | 3.1113   | 1.19   | Up | 5.52E-14 | 1.93E-13 |
| Unigene116830 | Potri.015G086500.1 | 67.9905  | 29.807   | 1.1897 | Up | 2.83E-30 | 1.73E-29 |
| Unigene44336  | Potri.013G133000.1 | 3.0785   | 1.3498   | 1.1895 | Up | 1.87E-05 | 3.84E-05 |
| Unigene8843   | Potri.011G046400.2 | 19.8828  | 8.7179   | 1.1895 | Up | 9.73E-14 | 3.36E-13 |
| Unigene32113  | Potri.017G113000.1 | 33.6396  | 14.7578  | 1.1887 | Up | 1.78E-60 | 2.13E-59 |
| Unigene51649  | Potri.002G200500.1 | 34.7694  | 15.2563  | 1.1884 | Up | 9.30E-42 | 7.60E-41 |
| Unigene245    | Potri.010G191600.1 | 7.3902   | 3.2438   | 1.1879 | Up | 1.45E-15 | 5.40E-15 |
| Unigene64889  | Potri.001G048500.1 | 4.7654   | 2.0917   | 1.1879 | Up | 3.35E-05 | 6.74E-05 |
| Unigene13214  | Potri.005G103200.1 | 26.8342  | 11.7809  | 1.1876 | Up | 2.84E-39 | 2.19E-38 |

|               |                    |          |         |        |    |          |          |
|---------------|--------------------|----------|---------|--------|----|----------|----------|
| Unigene47947  | Potri.009G149200.1 | 30.4956  | 13.3951 | 1.1869 | Up | 6.39E-31 | 3.98E-30 |
| Unigene41881  | Potri.018G044100.2 | 6.6078   | 2.9038  | 1.1862 | Up | 6.02E-05 | 1.18E-04 |
| Unigene14391  | Potri.005G194800.1 | 7.2873   | 3.2024  | 1.1862 | Up | 6.02E-05 | 1.18E-04 |
| Unigene21072  | Potri.014G138200.1 | 109.9355 | 48.3431 | 1.1853 | Up | 9.46E-57 | 1.06E-55 |
| Unigene38369  | Potri.019G042500.1 | 36.9379  | 16.2522 | 1.1845 | Up | 3.90E-35 | 2.71E-34 |
| Unigene104645 | Potri.005G216600.4 | 6.1445   | 2.7039  | 1.1843 | Up | 1.09E-04 | 2.07E-04 |
| Unigene31579  | Potri.014G079400.2 | 9.492    | 4.177   | 1.1842 | Up | 1.09E-04 | 2.07E-04 |
| Unigene62864  | Potri.004G084600.1 | 3.0486   | 1.3424  | 1.1833 | Up | 7.92E-07 | 1.84E-06 |
| Unigene8944   | Potri.010G146200.2 | 52.7801  | 23.2444 | 1.1831 | Up | 7.16E-22 | 3.39E-21 |
| Unigene116053 | Potri.014G080600.1 | 38.1528  | 16.8095 | 1.1825 | Up | 3.23E-16 | 1.24E-15 |
| Unigene95642  | Potri.008G054600.1 | 78.1244  | 34.427  | 1.1822 | Up | 9.95E-34 | 6.68E-33 |
| Unigene58820  | Potri.018G083000.1 | 4.6891   | 2.0667  | 1.182  | Up | 1.64E-05 | 3.40E-05 |
| Unigene43096  | Potri.001G169300.1 | 17.8251  | 7.8594  | 1.1814 | Up | 7.37E-28 | 4.21E-27 |
| Unigene34560  | Potri.004G116400.3 | 28.7813  | 12.6998 | 1.1803 | Up | 8.29E-33 | 5.44E-32 |
| Unigene29864  | Potri.006G123000.3 | 3.7663   | 1.6622  | 1.1801 | Up | 2.94E-05 | 5.94E-05 |
| Unigene49971  | Potri.002G127400.1 | 16.1243  | 7.1161  | 1.1801 | Up | 4.63E-17 | 1.84E-16 |
| Unigene24535  | Potri.019G132000.2 | 9.8193   | 4.3344  | 1.1798 | Up | 5.45E-15 | 1.99E-14 |
| Unigene96573  | Potri.001G410700.1 | 32.677   | 14.4255 | 1.1797 | Up | 4.43E-11 | 1.34E-10 |
| Unigene69991  | Potri.014G118100.6 | 9.3249   | 4.1173  | 1.1794 | Up | 3.92E-07 | 9.29E-07 |
| Unigene20810  | Potri.014G122800.1 | 13.1801  | 5.8219  | 1.1788 | Up | 7.83E-11 | 2.34E-10 |
| Unigene17829  | Potri.004G116400.3 | 17.6348  | 7.791   | 1.1785 | Up | 6.13E-08 | 1.54E-07 |
| Unigene24044  | Potri.016G128300.1 | 28.117   | 12.4237 | 1.1783 | Up | 2.41E-38 | 1.82E-37 |
| Unigene12830  | Potri.017G139000.1 | 4.7384   | 2.0943  | 1.1779 | Up | 5.29E-05 | 1.05E-04 |
| Unigene113327 | Potri.014G122000.1 | 40.2481  | 17.7895 | 1.1779 | Up | 2.97E-14 | 1.05E-13 |
| Unigene51453  | Potri.001G132700.1 | 6.4366   | 2.845   | 1.1779 | Up | 5.29E-05 | 1.05E-04 |
| Unigene15504  | Potri.003G070600.2 | 62.265   | 27.5373 | 1.177  | Up | 4.70E-21 | 2.16E-20 |
| Unigene26275  | Potri.006G249000.2 | 36.4054  | 16.1016 | 1.1769 | Up | 8.47E-15 | 3.06E-14 |
| Unigene22680  | Potri.001G149800.1 | 92.4671  | 40.9071 | 1.1766 | Up | 5.12E-40 | 4.02E-39 |
| Unigene27944  | Potri.017G145700.5 | 39.3322  | 17.4099 | 1.1758 | Up | 1.56E-19 | 6.83E-19 |
| Unigene115137 | Potri.006G153000.2 | 61.8144  | 27.4055 | 1.1735 | Up | 2.81E-23 | 1.39E-22 |
| Unigene32157  | Potri.018G100500.4 | 18.6668  | 8.2788  | 1.173  | Up | 5.83E-27 | 3.24E-26 |
| Unigene51125  | Potri.010G105700.3 | 28.2516  | 12.533  | 1.1726 | Up | 1.51E-08 | 3.96E-08 |
| Unigene116443 | Potri.009G059200.1 | 85.7071  | 38.0437 | 1.1718 | Up | 2.14E-35 | 1.50E-34 |
| Unigene46471  | Potri.003G108900.1 | 9.7925   | 4.3465  | 1.1718 | Up | 7.19E-14 | 2.49E-13 |
| Unigene8682   | Potri.006G038700.1 | 6.4588   | 2.8704  | 1.17   | Up | 4.64E-05 | 9.22E-05 |
| Unigene29117  | Potri.004G048600.1 | 11.7018  | 5.2004  | 1.17   | Up | 4.64E-05 | 9.22E-05 |
| Unigene51533  | Potri.008G009800.5 | 78.4698  | 34.8777 | 1.1698 | Up | 2.28E-32 | 1.48E-31 |
| Unigene61152  | Potri.002G134700.1 | 5.7314   | 2.5483  | 1.1694 | Up | 3.11E-04 | 5.64E-04 |
| Unigene53102  | Potri.009G115800.2 | 10.585   | 4.7064  | 1.1693 | Up | 3.11E-04 | 5.64E-04 |

|               |                    |          |         |        |    |           |           |
|---------------|--------------------|----------|---------|--------|----|-----------|-----------|
| Unigene3096   | Potri.016G128300.1 | 8.877    | 3.9483  | 1.1688 | Up | 1.52E-11  | 4.71E-11  |
| Unigene4286   | Potri.001G142200.1 | 40.0557  | 17.8161 | 1.1688 | Up | 1.52E-11  | 4.71E-11  |
| Unigene38702  | Potri.016G066200.1 | 14.2804  | 6.3531  | 1.1685 | Up | 9.48E-11  | 2.83E-10  |
| Unigene48150  | Potri.006G149700.2 | 51.9469  | 23.1203 | 1.1679 | Up | 1.47E-15  | 5.47E-15  |
| Unigene33084  | Potri.001G423800.1 | 20.3271  | 9.049   | 1.1676 | Up | 4.29E-39  | 3.29E-38  |
| Unigene28823  | Potri.010G145100.1 | 12.4969  | 5.5641  | 1.1674 | Up | 1.68E-10  | 4.92E-10  |
| Unigene111366 | Potri.010G232200.1 | 111.2556 | 49.5387 | 1.1673 | Up | 2.58E-33  | 1.72E-32  |
| Unigene11829  | Potri.001G166000.1 | 35.0841  | 15.6228 | 1.1672 | Up | 1.70E-41  | 1.38E-40  |
| Unigene26127  | Potri.002G261400.1 | 41.3716  | 18.4255 | 1.1669 | Up | 3.47E-13  | 1.17E-12  |
| Unigene27608  | Potri.017G145700.1 | 39.7977  | 17.726  | 1.1668 | Up | 6.75E-44  | 5.78E-43  |
| Unigene69194  | Potri.002G024700.1 | 7.1817   | 3.2002  | 1.1662 | Up | 2.96E-10  | 8.57E-10  |
| Unigene46318  | Potri.015G083800.2 | 7.0468   | 3.1415  | 1.1655 | Up | 5.64E-04  | 9.95E-04  |
| Unigene28345  | Potri.012G005900.6 | 10.5359  | 4.697   | 1.1655 | Up | 1.86E-09  | 5.14E-09  |
| Unigene84205  | Potri.008G039100.2 | 11.7575  | 5.2415  | 1.1655 | Up | 2.27E-05  | 4.64E-05  |
| Unigene50412  | Potri.006G194100.1 | 5.6338   | 2.5116  | 1.1655 | Up | 5.64E-04  | 9.95E-04  |
| Unigene71701  | Potri.001G167400.1 | 10.6048  | 4.7277  | 1.1655 | Up | 5.64E-04  | 9.95E-04  |
| Unigene47417  | Potri.018G067300.1 | 64.0003  | 28.5469 | 1.1647 | Up | 2.75E-30  | 1.68E-29  |
| Unigene49873  | Potri.009G129200.1 | 20.0603  | 8.9488  | 1.1646 | Up | 4.00E-19  | 1.73E-18  |
| Unigene65711  | Potri.001G248100.1 | 17.626   | 7.8644  | 1.1643 | Up | 1.48E-10  | 4.34E-10  |
| Unigene11369  | Potri.012G089400.1 | 9.0057   | 4.0185  | 1.1642 | Up | 8.69E-14  | 3.00E-13  |
| Unigene88831  | Potri.008G002500.3 | 7.6568   | 3.4175  | 1.1638 | Up | 1.51E-04  | 2.83E-04  |
| Unigene64002  | Potri.002G184400.1 | 6.4788   | 2.8917  | 1.1638 | Up | 1.51E-04  | 2.83E-04  |
| Unigene12599  | Potri.001G152600.1 | 67.8936  | 30.327  | 1.1627 | Up | 7.73E-46  | 6.92E-45  |
| Unigene113076 | Potri.018G105900.2 | 18.3514  | 8.1978  | 1.1626 | Up | 4.75E-07  | 1.12E-06  |
| Unigene38401  | Potri.006G088100.1 | 4.9884   | 2.2291  | 1.1621 | Up | 1.64E-09  | 4.54E-09  |
| Unigene44644  | Potri.001G071700.1 | 63.2035  | 28.249  | 1.1618 | Up | 5.00E-56  | 5.52E-55  |
| Unigene5456   | Potri.002G192500.1 | 173.3541 | 77.5    | 1.1615 | Up | 6.03E-46  | 5.41E-45  |
| Unigene114316 | Potri.010G115800.1 | 38.6965  | 17.3082 | 1.1607 | Up | 3.84E-14  | 1.35E-13  |
| Unigene47003  | Potri.010G151500.1 | 22.1802  | 9.9223  | 1.1605 | Up | 1.09E-14  | 3.93E-14  |
| Unigene63435  | Potri.002G100900.1 | 14.3701  | 6.4296  | 1.1603 | Up | 8.15E-10  | 2.30E-09  |
| Unigene50377  | Potri.001G148800.1 | 116.6535 | 52.1952 | 1.1602 | Up | 1.63E-101 | 3.55E-100 |
| Unigene3431   | Potri.010G203700.1 | 20.0211  | 8.9629  | 1.1595 | Up | 1.84E-11  | 5.67E-11  |
| Unigene2785   | Potri.004G178000.1 | 46.8125  | 20.9612 | 1.1592 | Up | 4.61E-41  | 3.71E-40  |
| Unigene49315  | Potri.006G130600.1 | 5.6841   | 2.5479  | 1.1576 | Up | 1.16E-07  | 2.86E-07  |
| Unigene40098  | Potri.008G130300.3 | 8.711    | 3.9051  | 1.1575 | Up | 3.24E-08  | 8.32E-08  |
| Unigene9288   | Potri.013G059500.2 | 69.612   | 31.2303 | 1.1564 | Up | 7.45E-32  | 4.76E-31  |
| Unigene111196 | Potri.001G239900.2 | 141.7383 | 63.5975 | 1.1562 | Up | 4.90E-41  | 3.94E-40  |
| Unigene45792  | Potri.018G083800.2 | 8.1678   | 3.6665  | 1.1555 | Up | 4.93E-04  | 8.73E-04  |
| Unigene405    | Potri.012G017300.1 | 18.1513  | 8.1482  | 1.1555 | Up | 2.04E-25  | 1.08E-24  |



|               |                    |          |         |        |    |          |          |
|---------------|--------------------|----------|---------|--------|----|----------|----------|
| Unigene88603  | Potri.011G043300.1 | 14.6534  | 6.5779  | 1.1555 | Up | 2.06E-07 | 5.00E-07 |
| Unigene20425  | Potri.009G079300.1 | 9.2182   | 4.1381  | 1.1555 | Up | 2.69E-06 | 5.96E-06 |
| Unigene45319  | Potri.004G188700.1 | 6.288    | 2.8227  | 1.1555 | Up | 2.06E-07 | 5.00E-07 |
| Unigene114390 | Potri.004G187700.1 | 54.9094  | 24.6489 | 1.1555 | Up | 1.89E-19 | 8.23E-19 |
| Unigene107798 | Potri.018G100400.1 | 71.843   | 32.2669 | 1.1548 | Up | 3.31E-19 | 1.43E-18 |
| Unigene111747 | Potri.010G116500.3 | 65.5903  | 29.4578 | 1.1548 | Up | 2.72E-20 | 1.22E-19 |
| Unigene29410  | Potri.012G011600.1 | 11.3404  | 5.0955  | 1.1542 | Up | 5.03E-11 | 1.52E-10 |
| Unigene29752  | Potri.014G069200.2 | 54.3307  | 24.4144 | 1.154  | Up | 5.82E-19 | 2.49E-18 |
| Unigene33134  | Potri.012G118700.1 | 3.9353   | 1.7696  | 1.1531 | Up | 7.11E-12 | 2.24E-11 |
| Unigene86890  | Potri.001G449000.1 | 81.5019  | 36.6625 | 1.1525 | Up | 7.91E-32 | 5.05E-31 |
| Unigene49954  | Potri.019G120300.1 | 7.6275   | 3.4315  | 1.1524 | Up | 6.27E-18 | 2.58E-17 |
| Unigene23905  | Potri.018G039100.2 | 4.7071   | 2.1184  | 1.1519 | Up | 6.42E-05 | 1.26E-04 |
| Unigene37851  | Potri.014G070300.1 | 3.2381   | 1.4573  | 1.1518 | Up | 6.42E-05 | 1.26E-04 |
| Unigene63384  | Potri.005G018800.1 | 7.7853   | 3.5053  | 1.1512 | Up | 2.38E-04 | 4.38E-04 |
| Unigene36774  | Potri.015G082400.1 | 5.2668   | 2.372   | 1.1508 | Up | 6.52E-07 | 1.52E-06 |
| Unigene13568  | Potri.014G052400.1 | 16.1776  | 7.287   | 1.1506 | Up | 6.51E-20 | 2.89E-19 |
| Unigene3428   | Potri.008G016800.1 | 12.8619  | 5.7947  | 1.1503 | Up | 2.36E-06 | 5.26E-06 |
| Unigene22212  | Potri.005G032200.1 | 13.7559  | 6.1988  | 1.15   | Up | 7.82E-11 | 2.34E-10 |
| Unigene24198  | Potri.013G009700.1 | 19.8202  | 8.9361  | 1.1493 | Up | 2.01E-36 | 1.45E-35 |
| Unigene17524  | Potri.001G255600.1 | 3.5328   | 1.5932  | 1.1489 | Up | 3.13E-05 | 6.31E-05 |
| Unigene36156  | Potri.001G243300.1 | 19.4018  | 8.75    | 1.1488 | Up | 3.22E-07 | 7.70E-07 |
| Unigene12411  | Potri.001G233400.1 | 47.8219  | 21.5731 | 1.1484 | Up | 8.41E-29 | 4.94E-28 |
| Unigene41665  | Potri.018G003100.1 | 5.2264   | 2.3582  | 1.1481 | Up | 1.16E-06 | 2.66E-06 |
| Unigene46655  | Potri.006G151800.3 | 6.6424   | 2.9971  | 1.1481 | Up | 1.16E-06 | 2.66E-06 |
| Unigene23369  | Potri.T076700.1    | 4.7102   | 2.1258  | 1.1478 | Up | 1.15E-04 | 2.20E-04 |
| Unigene45160  | Potri.006G240900.2 | 50.8125  | 22.9345 | 1.1477 | Up | 4.27E-26 | 2.31E-25 |
| Unigene24346  | Potri.005G113600.1 | 29.1547  | 13.1624 | 1.1473 | Up | 1.29E-15 | 4.81E-15 |
| Unigene15686  | Potri.004G135300.1 | 146.4353 | 66.1249 | 1.147  | Up | 1.29E-67 | 1.74E-66 |
| Unigene189    | Potri.015G093100.7 | 6.7174   | 3.0338  | 1.1468 | Up | 1.28E-20 | 5.81E-20 |
| Unigene33070  | Potri.002G032600.1 | 39.2665  | 17.738  | 1.1465 | Up | 1.31E-25 | 6.99E-25 |
| Unigene19338  | Potri.009G073000.1 | 5.6404   | 2.5483  | 1.1463 | Up | 4.31E-04 | 7.68E-04 |
| Unigene30323  | Potri.004G135300.1 | 40.7665  | 18.4182 | 1.1463 | Up | 9.23E-17 | 3.63E-16 |
| Unigene30506  | Potri.003G140500.8 | 8.0298   | 3.6278  | 1.1463 | Up | 4.31E-04 | 7.68E-04 |
| Unigene5327   | Potri.003G051400.1 | 25.6952  | 11.6091 | 1.1462 | Up | 2.21E-08 | 5.71E-08 |
| Unigene39618  | Potri.011G131100.1 | 20.0331  | 9.0527  | 1.146  | Up | 5.44E-19 | 2.33E-18 |
| Unigene19059  | Potri.002G167700.6 | 9.8186   | 4.438   | 1.1456 | Up | 3.07E-09 | 8.38E-09 |
| Unigene28122  | Potri.006G064000.2 | 4.3038   | 1.9463  | 1.1449 | Up | 5.62E-05 | 1.10E-04 |
| Unigene108284 | Potri.004G236600.2 | 14.6663  | 6.6325  | 1.1449 | Up | 5.62E-05 | 1.10E-04 |
| Unigene46113  | Potri.T093900.7    | 14.3338  | 6.4842  | 1.1444 | Up | 1.53E-09 | 4.24E-09 |

|               |                    |          |         |        |    |           |           |
|---------------|--------------------|----------|---------|--------|----|-----------|-----------|
| Unigene33147  | Potri.001G238800.1 | 26.9269  | 12.191  | 1.1432 | Up | 6.06E-13  | 2.01E-12  |
| Unigene23923  | Potri.009G145900.1 | 13.3271  | 6.0409  | 1.1415 | Up | 4.41E-16  | 1.68E-15  |
| Unigene24210  | Potri.013G044900.1 | 58.6895  | 26.6139 | 1.1409 | Up | 6.62E-65  | 8.58E-64  |
| Unigene3287   | Potri.001G190100.1 | 14.0743  | 6.3829  | 1.1408 | Up | 5.85E-24  | 2.96E-23  |
| Unigene38152  | Potri.006G229500.1 | 5.1729   | 2.3466  | 1.1404 | Up | 1.01E-04  | 1.94E-04  |
| Unigene113817 | Potri.004G197700.1 | 19.0802  | 8.6553  | 1.1404 | Up | 2.49E-07  | 5.99E-07  |
| Unigene24577  | Potri.004G055900.1 | 16.1066  | 7.3064  | 1.1404 | Up | 3.43E-08  | 8.79E-08  |
| Unigene38522  | Potri.009G041800.1 | 91.9167  | 41.7048 | 1.1401 | Up | 2.55E-53  | 2.67E-52  |
| Unigene43242  | Potri.006G064000.1 | 38.8941  | 17.6505 | 1.1398 | Up | 2.02E-56  | 2.25E-55  |
| Unigene4495   | Potri.012G074500.1 | 55.404   | 25.1451 | 1.1397 | Up | 5.15E-24  | 2.61E-23  |
| Unigene83573  | Potri.018G032100.1 | 59.4591  | 26.9879 | 1.1396 | Up | 1.19E-20  | 5.41E-20  |
| Unigene68348  | Potri.001G294600.1 | 5.8637   | 2.6615  | 1.1396 | Up | 4.69E-11  | 1.42E-10  |
| Unigene39008  | Potri.010G038700.7 | 17.1211  | 7.7735  | 1.1391 | Up | 1.23E-07  | 3.03E-07  |
| Unigene29264  | Potri.005G159100.1 | 85.4055  | 38.7768 | 1.1391 | Up | 8.99E-45  | 7.85E-44  |
| Unigene11580  | Potri.001G334500.1 | 28.3648  | 12.8799 | 1.139  | Up | 3.22E-51  | 3.22E-50  |
| Unigene13065  | Potri.005G172100.1 | 23.7049  | 10.7694 | 1.1382 | Up | 7.28E-20  | 3.22E-19  |
| Unigene46373  | Potri.013G018400.2 | 51.2268  | 23.2833 | 1.1376 | Up | 1.20E-15  | 4.48E-15  |
| Unigene38860  | Potri.001G186200.1 | 28.8889  | 13.1324 | 1.1374 | Up | 5.83E-12  | 1.85E-11  |
| Unigene16558  | Potri.011G044300.2 | 5.4136   | 2.4614  | 1.1371 | Up | 3.24E-06  | 7.15E-06  |
| Unigene57117  | Potri.010G233200.3 | 5.7587   | 2.6183  | 1.1371 | Up | 3.24E-06  | 7.15E-06  |
| Unigene40116  | Potri.008G056100.1 | 44.3783  | 20.1806 | 1.1369 | Up | 2.09E-37  | 1.54E-36  |
| Unigene93540  | Potri.015G012400.1 | 5.6325   | 2.5621  | 1.1364 | Up | 2.40E-05  | 4.90E-05  |
| Unigene118907 | Potri.018G081000.1 | 13.4135  | 6.1051  | 1.1356 | Up | 1.04E-09  | 2.91E-09  |
| Unigene39432  | Potri.009G079100.1 | 16.5065  | 7.5132  | 1.1355 | Up | 7.27E-13  | 2.41E-12  |
| Unigene82041  | Potri.014G197200.1 | 10.2646  | 4.6727  | 1.1353 | Up | 1.82E-04  | 3.40E-04  |
| Unigene38142  | Potri.001G378400.1 | 25.3148  | 11.5285 | 1.1348 | Up | 9.90E-20  | 4.36E-19  |
| Unigene16221  | Potri.006G262700.2 | 36.8502  | 16.7842 | 1.1346 | Up | 2.56E-12  | 8.25E-12  |
| Unigene48685  | Potri.004G217200.3 | 138.5412 | 63.1482 | 1.1335 | Up | 1.42E-34  | 9.74E-34  |
| Unigene91705  | Potri.001G263800.2 | 6.6882   | 3.0485  | 1.1335 | Up | 8.84E-05  | 1.70E-04  |
| Unigene151    | Potri.002G086400.1 | 35.4615  | 16.1667 | 1.1332 | Up | 2.32E-170 | 9.83E-169 |
| Unigene16952  | Potri.017G113200.1 | 26.5001  | 12.0824 | 1.1331 | Up | 1.63E-15  | 6.06E-15  |
| Unigene51272  | Potri.002G089100.2 | 16.742   | 7.6344  | 1.1329 | Up | 6.39E-11  | 1.92E-10  |
| Unigene691    | Potri.010G095400.1 | 7.3034   | 3.332   | 1.1322 | Up | 4.54E-10  | 1.30E-09  |
| Unigene80340  | Potri.018G013800.1 | 12.8359  | 5.857   | 1.132  | Up | 4.31E-05  | 8.57E-05  |
| Unigene70055  | Potri.015G113000.6 | 6.0161   | 2.7451  | 1.132  | Up | 4.31E-05  | 8.57E-05  |
| Unigene16062  | Potri.014G156900.1 | 22.2526  | 10.1605 | 1.131  | Up | 1.13E-10  | 3.34E-10  |
| Unigene110469 | Potri.002G104700.3 | 170.0127 | 77.6794 | 1.13   | Up | 5.31E-46  | 4.76E-45  |
| Unigene62773  | Potri.009G082300.3 | 3.5523   | 1.6236  | 1.1296 | Up | 3.28E-04  | 5.95E-04  |
| Unigene35467  | Potri.001G134800.2 | 27.2515  | 12.4656 | 1.1284 | Up | 2.85E-09  | 7.80E-09  |

|               |                    |         |         |        |    |          |          |
|---------------|--------------------|---------|---------|--------|----|----------|----------|
| Unigene23421  | Potri.006G128000.2 | 12.8741 | 5.89    | 1.1281 | Up | 8.31E-08 | 2.07E-07 |
| Unigene24263  | Potri.008G119800.1 | 78.5831 | 35.9552 | 1.128  | Up | 1.44E-60 | 1.72E-59 |
| Unigene9036   | Potri.003G045000.1 | 33.4912 | 15.3259 | 1.1278 | Up | 1.55E-14 | 5.54E-14 |
| Unigene16964  | Potri.018G021000.1 | 14.3119 | 6.5497  | 1.1277 | Up | 2.46E-11 | 7.56E-11 |
| Unigene23189  | Potri.004G191600.1 | 5.5391  | 2.5356  | 1.1273 | Up | 1.23E-11 | 3.83E-11 |
| Unigene117713 | Potri.006G128600.5 | 36.2141 | 16.5844 | 1.1267 | Up | 1.76E-17 | 7.13E-17 |
| Unigene2032   | Potri.016G117500.6 | 11.0942 | 5.0833  | 1.126  | Up | 5.03E-09 | 1.36E-08 |
| Unigene71904  | Potri.002G029600.1 | 59.8612 | 27.4436 | 1.1252 | Up | 8.58E-16 | 3.24E-15 |
| Unigene31066  | Potri.014G190000.1 | 15.2111 | 6.9736  | 1.1251 | Up | 1.24E-09 | 3.47E-09 |
| Unigene43394  | Potri.009G110800.1 | 60.0616 | 27.5405 | 1.1249 | Up | 7.06E-60 | 8.38E-59 |
| Unigene16439  | Potri.009G092400.1 | 13.0348 | 5.9774  | 1.1248 | Up | 6.19E-10 | 1.76E-09 |
| Unigene33193  | Potri.015G004600.1 | 8.1897  | 3.7564  | 1.1245 | Up | 9.02E-06 | 1.91E-05 |
| Unigene52059  | Potri.005G049300.6 | 9.2109  | 4.2249  | 1.1244 | Up | 9.02E-06 | 1.91E-05 |
| Unigene53461  | Potri.002G208100.3 | 13.4465 | 6.1726  | 1.1233 | Up | 2.18E-06 | 4.87E-06 |
| Unigene82678  | Potri.014G096200.1 | 66.2315 | 30.4063 | 1.1231 | Up | 1.01E-21 | 4.74E-21 |
| Unigene25499  | Potri.009G140000.1 | 59.4981 | 27.3324 | 1.1222 | Up | 1.52E-18 | 6.39E-18 |
| Unigene52014  | Potri.011G169900.4 | 4.1444  | 1.9042  | 1.122  | Up | 2.87E-04 | 5.23E-04 |
| Unigene84405  | Potri.007G025400.1 | 18.2473 | 8.384   | 1.122  | Up | 2.61E-07 | 6.30E-07 |
| Unigene3539   | Potri.013G076100.2 | 7.4418  | 3.4221  | 1.1208 | Up | 6.75E-05 | 1.32E-04 |
| Unigene33712  | Potri.011G044300.1 | 8.4772  | 3.8991  | 1.1204 | Up | 1.04E-12 | 3.41E-12 |
| Unigene2419   | Potri.005G046600.1 | 8.6517  | 3.9815  | 1.1197 | Up | 1.63E-14 | 5.80E-14 |
| Unigene68726  | Potri.007G134700.1 | 7.0016  | 3.223   | 1.1193 | Up | 3.88E-06 | 8.51E-06 |
| Unigene30836  | Potri.001G449000.1 | 34.1846 | 15.7471 | 1.1183 | Up | 6.56E-20 | 2.91E-19 |
| Unigene4824   | Potri.005G024600.3 | 10.6754 | 4.9192  | 1.1178 | Up | 1.38E-08 | 3.62E-08 |
| Unigene31752  | Potri.010G126700.3 | 93.7856 | 43.2208 | 1.1176 | Up | 1.73E-31 | 1.09E-30 |
| Unigene21839  | Potri.001G401600.1 | 25.6546 | 11.8248 | 1.1174 | Up | 3.51E-26 | 1.91E-25 |
| Unigene2384   | Potri.015G093600.1 | 9.0975  | 4.2005  | 1.1149 | Up | 1.76E-13 | 6.01E-13 |
| Unigene38944  | Potri.015G038300.3 | 4.3319  | 2.0002  | 1.1149 | Up | 1.21E-04 | 2.30E-04 |
| Unigene23261  | Potri.006G129500.1 | 11.868  | 5.4798  | 1.1149 | Up | 1.21E-08 | 3.18E-08 |
| Unigene26517  | Potri.002G131400.2 | 5.3384  | 2.4649  | 1.1149 | Up | 1.21E-04 | 2.30E-04 |
| Unigene45004  | Potri.001G139300.1 | 8.1849  | 3.7792  | 1.1149 | Up | 1.76E-13 | 6.01E-13 |
| Unigene10111  | Potri.T034400.2    | 3.968   | 1.8322  | 1.1148 | Up | 2.50E-04 | 4.59E-04 |
| Unigene117499 | Potri.009G041800.1 | 61.7231 | 28.515  | 1.1141 | Up | 2.68E-27 | 1.51E-26 |
| Unigene43731  | Potri.005G070100.3 | 44.2069 | 20.4233 | 1.1141 | Up | 4.18E-26 | 2.26E-25 |
| Unigene5392   | Potri.017G146800.1 | 73.0156 | 33.7404 | 1.1137 | Up | 3.10E-19 | 1.34E-18 |
| Unigene51081  | Potri.004G100700.2 | 12.5146 | 5.7877  | 1.1126 | Up | 3.23E-10 | 9.32E-10 |
| Unigene58229  | Potri.011G127400.1 | 6.9011  | 3.1922  | 1.1123 | Up | 3.40E-17 | 1.36E-16 |
| Unigene46696  | Potri.008G055300.3 | 39.2627 | 18.1734 | 1.1113 | Up | 1.75E-24 | 9.03E-24 |
| Unigene112735 | Potri.010G214700.3 | 41.2418 | 19.1125 | 1.1096 | Up | 4.78E-13 | 1.60E-12 |

|               |                    |          |         |        |    |           |           |
|---------------|--------------------|----------|---------|--------|----|-----------|-----------|
| Unigene52691  | Potri.008G187900.1 | 31.0429  | 14.3889 | 1.1093 | Up | 1.91E-12  | 6.20E-12  |
| Unigene74290  | Potri.013G044900.1 | 28.6252  | 13.2705 | 1.1091 | Up | 1.88E-08  | 4.89E-08  |
| Unigene14549  | Potri.013G015400.1 | 41.9829  | 19.4619 | 1.1091 | Up | 3.83E-12  | 1.22E-11  |
| Unigene38906  | Potri.016G043600.3 | 6.7739   | 3.1409  | 1.1088 | Up | 1.06E-04  | 2.02E-04  |
| Unigene42491  | Potri.004G154600.1 | 137.0944 | 63.5664 | 1.1088 | Up | 7.28E-165 | 2.97E-163 |
| Unigene37563  | Potri.016G061900.1 | 91.426   | 42.4009 | 1.1085 | Up | 7.61E-43  | 6.37E-42  |
| Unigene19464  | Potri.005G122900.1 | 14.2531  | 6.6108  | 1.1084 | Up | 5.25E-14  | 1.83E-13  |
| Unigene15183  | Potri.009G166000.1 | 11.9891  | 5.5613  | 1.1082 | Up | 2.18E-04  | 4.03E-04  |
| Unigene21306  | Potri.007G029600.1 | 21.9253  | 10.1711 | 1.1081 | Up | 1.70E-43  | 1.45E-42  |
| Unigene67444  | Potri.013G023100.7 | 10.2732  | 4.7677  | 1.1075 | Up | 6.32E-07  | 1.48E-06  |
| Unigene23317  | Potri.012G002100.3 | 6.7912   | 3.1518  | 1.1075 | Up | 4.51E-04  | 8.03E-04  |
| Unigene84555  | Potri.008G157400.3 | 8.6588   | 4.0185  | 1.1075 | Up | 4.51E-04  | 8.03E-04  |
| Unigene86347  | Potri.008G023800.1 | 8.0816   | 3.7506  | 1.1075 | Up | 4.51E-04  | 8.03E-04  |
| Unigene52804  | Potri.006G189600.1 | 5.3997   | 2.506   | 1.1075 | Up | 4.51E-04  | 8.03E-04  |
| Unigene14683  | Potri.005G072500.1 | 5.3402   | 2.4784  | 1.1075 | Up | 4.51E-04  | 8.03E-04  |
| Unigene39344  | Potri.003G115200.1 | 58.8493  | 27.3109 | 1.1075 | Up | 3.83E-51  | 3.83E-50  |
| Unigene14096  | Potri.018G048100.1 | 140.5083 | 65.2469 | 1.1067 | Up | 8.50E-46  | 7.59E-45  |
| Unigene28816  | Potri.004G100700.2 | 23.0278  | 10.6962 | 1.1063 | Up | 1.27E-15  | 4.77E-15  |
| Unigene12806  | Potri.001G044700.2 | 35.9518  | 16.6985 | 1.1063 | Up | 1.90E-46  | 1.72E-45  |
| Unigene34584  | Potri.001G234700.1 | 17.3515  | 8.0634  | 1.1056 | Up | 1.80E-25  | 9.56E-25  |
| Unigene111141 | Potri.010G111000.2 | 16.5415  | 7.6876  | 1.1055 | Up | 1.08E-05  | 2.27E-05  |
| Unigene9676   | Potri.002G036200.2 | 6.1166   | 2.8427  | 1.1055 | Up | 1.08E-05  | 2.27E-05  |
| Unigene8246   | Potri.014G147100.1 | 6.4294   | 2.989   | 1.105  | Up | 1.35E-07  | 3.32E-07  |
| Unigene11666  | Potri.013G049700.1 | 29.3175  | 13.6294 | 1.105  | Up | 4.01E-26  | 2.17E-25  |
| Unigene36158  | Potri.001G371500.2 | 76.6946  | 35.67   | 1.1044 | Up | 2.64E-32  | 1.71E-31  |
| Unigene27720  | Potri.017G071200.1 | 4.9285   | 2.2928  | 1.104  | Up | 4.50E-05  | 8.95E-05  |
| Unigene10621  | Potri.001G239300.1 | 12.0086  | 5.5867  | 1.104  | Up | 5.53E-07  | 1.30E-06  |
| Unigene634    | Potri.014G006200.1 | 26.7075  | 12.4266 | 1.1038 | Up | 4.82E-36  | 3.43E-35  |
| Unigene8564   | Potri.015G069400.1 | 64.2822  | 29.9252 | 1.1031 | Up | 1.52E-18  | 6.43E-18  |
| Unigene30946  | Potri.007G144800.3 | 5.5538   | 2.5854  | 1.1031 | Up | 9.24E-05  | 1.78E-04  |
| Unigene2212   | Potri.004G095200.1 | 6.079    | 2.8299  | 1.1031 | Up | 9.24E-05  | 1.78E-04  |
| Unigene3749   | Potri.001G348500.1 | 44.958   | 20.933  | 1.1028 | Up | 7.82E-15  | 2.83E-14  |
| Unigene31792  | Potri.006G278200.1 | 22.9881  | 10.7056 | 1.1025 | Up | 9.45E-81  | 1.57E-79  |
| Unigene6367   | Potri.005G196700.4 | 33.9051  | 15.7901 | 1.1025 | Up | 4.20E-37  | 3.07E-36  |
| Unigene27249  | Potri.002G029600.1 | 60.481   | 28.1672 | 1.1025 | Up | 4.33E-16  | 1.65E-15  |
| Unigene8745   | Potri.T111400.1    | 12.7197  | 5.9259  | 1.102  | Up | 1.90E-04  | 3.55E-04  |
| Unigene33628  | Potri.015G020500.1 | 31.7992  | 14.8148 | 1.102  | Up | 4.79E-17  | 1.91E-16  |
| Unigene79944  | Potri.008G119600.1 | 11.266   | 5.2487  | 1.1019 | Up | 1.90E-04  | 3.55E-04  |
| Unigene20943  | Potri.002G167400.1 | 4.9554   | 2.3087  | 1.1019 | Up | 1.18E-07  | 2.92E-07  |

|               |                    |          |         |        |    |          |          |
|---------------|--------------------|----------|---------|--------|----|----------|----------|
| Unigene46878  | Potri.014G028900.5 | 5.4684   | 2.55    | 1.1006 | Up | 3.93E-04 | 7.04E-04 |
| Unigene76862  | Potri.013G024700.1 | 10.9608  | 5.1113  | 1.1006 | Up | 3.93E-04 | 7.04E-04 |
| Unigene89267  | Potri.001G242100.1 | 7.1199   | 3.3201  | 1.1006 | Up | 3.93E-04 | 7.04E-04 |
| Unigene3007   | Potri.009G088100.1 | 43.8148  | 20.4436 | 1.0998 | Up | 5.12E-24 | 2.60E-23 |
| Unigene32116  | Potri.005G154500.1 | 8.883    | 4.1449  | 1.0997 | Up | 1.63E-26 | 8.91E-26 |
| Unigene28526  | Potri.010G123200.1 | 13.6047  | 6.3515  | 1.0989 | Up | 1.99E-06 | 4.48E-06 |
| Unigene113770 | Potri.009G156500.1 | 73.447   | 34.2893 | 1.0989 | Up | 8.01E-23 | 3.91E-22 |
| Unigene24022  | Potri.014G130300.1 | 10.75    | 5.0196  | 1.0987 | Up | 9.08E-19 | 3.86E-18 |
| Unigene48245  | Potri.001G102100.3 | 12.5798  | 5.8761  | 1.0982 | Up | 2.09E-07 | 5.07E-07 |
| Unigene32566  | Potri.001G006900.1 | 13.525   | 6.3181  | 1.0981 | Up | 3.50E-12 | 1.12E-11 |
| Unigene11237  | Potri.009G151700.1 | 15.2756  | 7.1382  | 1.0976 | Up | 7.01E-12 | 2.21E-11 |
| Unigene374    | Potri.005G225700.1 | 27.294   | 12.7595 | 1.097  | Up | 3.16E-18 | 1.32E-17 |
| Unigene102837 | Potri.011G044700.1 | 23.8178  | 11.1357 | 1.0968 | Up | 2.59E-10 | 7.52E-10 |
| Unigene9217   | Potri.001G137000.1 | 100.302  | 46.8983 | 1.0967 | Up | 1.27E-49 | 1.23E-48 |
| Unigene23844  | Potri.006G248900.1 | 59.9954  | 28.0615 | 1.0963 | Up | 6.47E-41 | 5.19E-40 |
| Unigene45203  | Potri.003G108800.7 | 46.0061  | 21.5316 | 1.0954 | Up | 7.62E-21 | 3.49E-20 |
| Unigene27953  | Potri.005G099600.2 | 19.3452  | 9.0587  | 1.0946 | Up | 3.25E-14 | 1.14E-13 |
| Unigene3836   | Potri.017G132100.1 | 48.4481  | 22.6876 | 1.0945 | Up | 3.96E-16 | 1.51E-15 |
| Unigene9692   | Potri.003G156600.1 | 3.4111   | 1.5978  | 1.0942 | Up | 3.43E-05 | 6.90E-05 |
| Unigene29933  | Potri.018G114700.1 | 6.4828   | 3.0367  | 1.0941 | Up | 3.43E-04 | 6.20E-04 |
| Unigene27371  | Potri.016G087400.1 | 3.0207   | 1.415   | 1.0941 | Up | 3.43E-05 | 6.90E-05 |
| Unigene43509  | Potri.006G064000.2 | 46.3326  | 21.7055 | 1.094  | Up | 2.67E-39 | 2.06E-38 |
| Unigene59906  | Potri.005G025700.1 | 120.2026 | 56.318  | 1.0938 | Up | 4.69E-38 | 3.51E-37 |
| Unigene44159  | Potri.018G097700.2 | 7.8373   | 3.6745  | 1.0928 | Up | 7.20E-06 | 1.55E-05 |
| Unigene38318  | Potri.016G065600.1 | 5.3711   | 2.5183  | 1.0928 | Up | 7.20E-06 | 1.55E-05 |
| Unigene61875  | Potri.T141600.1    | 5.0566   | 2.3714  | 1.0924 | Up | 7.04E-05 | 1.37E-04 |
| Unigene32438  | Potri.005G143100.1 | 15.7265  | 7.3753  | 1.0924 | Up | 4.16E-19 | 1.79E-18 |
| Unigene42604  | Potri.002G087700.4 | 8.9581   | 4.2026  | 1.0919 | Up | 5.64E-23 | 2.77E-22 |
| Unigene28417  | Potri.013G015400.1 | 58.2302  | 27.3202 | 1.0918 | Up | 2.48E-37 | 1.83E-36 |
| Unigene45276  | Potri.007G027200.1 | 18.4541  | 8.6598  | 1.0915 | Up | 7.78E-27 | 4.31E-26 |
| Unigene50016  | Potri.004G111400.1 | 20.6614  | 9.6973  | 1.0913 | Up | 4.99E-14 | 1.74E-13 |
| Unigene41264  | Potri.001G157400.1 | 7.4747   | 3.5082  | 1.0913 | Up | 1.47E-05 | 3.06E-05 |
| Unigene23199  | Potri.001G254600.2 | 20.7686  | 9.7481  | 1.0912 | Up | 5.54E-24 | 2.81E-23 |
| Unigene42429  | Potri.009G153900.1 | 20.1731  | 9.4719  | 1.0907 | Up | 1.08E-39 | 8.40E-39 |
| Unigene42732  | Potri.001G035600.1 | 12.5156  | 5.8766  | 1.0907 | Up | 9.53E-31 | 5.91E-30 |
| Unigene36699  | Potri.013G043000.1 | 12.1731  | 5.7167  | 1.0904 | Up | 1.45E-04 | 2.73E-04 |
| Unigene91055  | Potri.018G021000.1 | 12.2793  | 5.7692  | 1.0898 | Up | 6.57E-07 | 1.53E-06 |
| Unigene41419  | Potri.016G120100.2 | 72.1274  | 33.8911 | 1.0896 | Up | 5.91E-28 | 3.38E-27 |
| Unigene8344   | Potri.006G278500.3 | 5.3043   | 2.4926  | 1.0895 | Up | 3.00E-05 | 6.05E-05 |

|              |                    |          |          |        |    |           |           |
|--------------|--------------------|----------|----------|--------|----|-----------|-----------|
| Unigene29662 | Potri.005G182900.1 | 7.5891   | 3.5662   | 1.0895 | Up | 3.00E-05  | 6.05E-05  |
| Unigene14107 | Potri.004G101500.1 | 9.2232   | 4.3351   | 1.0892 | Up | 7.02E-10  | 1.99E-09  |
| Unigene966   | Potri.009G090800.1 | 22.1495  | 10.4184  | 1.0881 | Up | 2.69E-21  | 1.25E-20  |
| Unigene4115  | Potri.017G109300.1 | 4.5115   | 2.1222   | 1.088  | Up | 2.98E-04  | 5.44E-04  |
| Unigene12506 | Potri.012G105000.2 | 13.9506  | 6.5657   | 1.0873 | Up | 2.84E-09  | 7.77E-09  |
| Unigene16630 | Potri.002G192500.1 | 373.2369 | 175.6965 | 1.087  | Up | 1.62E-127 | 4.69E-126 |
| Unigene1342  | Potri.011G119800.6 | 12.5209  | 5.8946   | 1.0869 | Up | 2.92E-11  | 8.93E-11  |
| Unigene4727  | Potri.012G053700.2 | 51.4359  | 24.2212  | 1.0865 | Up | 6.73E-14  | 2.34E-13  |
| Unigene42817 | Potri.001G208800.2 | 16.8036  | 7.9153   | 1.0861 | Up | 8.39E-20  | 3.71E-19  |
| Unigene32177 | Potri.003G198100.1 | 34.8813  | 16.4478  | 1.0846 | Up | 1.12E-59  | 1.32E-58  |
| Unigene38589 | Potri.002G013600.1 | 7.4265   | 3.5061   | 1.0828 | Up | 5.35E-05  | 1.06E-04  |
| Unigene65679 | Potri.015G138900.1 | 7.7125   | 3.6444   | 1.0815 | Up | 2.02E-08  | 5.26E-08  |
| Unigene52654 | Potri.010G062700.1 | 23.1095  | 10.9199  | 1.0815 | Up | 9.14E-18  | 3.74E-17  |
| Unigene20480 | Potri.002G167700.5 | 68.731   | 32.4824  | 1.0813 | Up | 6.98E-43  | 5.85E-42  |
| Unigene40024 | Potri.014G013600.1 | 11.9992  | 5.6711   | 1.0812 | Up | 4.14E-10  | 1.19E-09  |
| Unigene28679 | Potri.002G085300.1 | 6.9751   | 3.2991   | 1.0801 | Up | 4.08E-08  | 1.04E-07  |
| Unigene10036 | Potri.013G006000.4 | 40.2613  | 19.0456  | 1.0799 | Up | 3.44E-19  | 1.49E-18  |
| Unigene23173 | Potri.011G049300.1 | 7.0683   | 3.3445   | 1.0796 | Up | 1.90E-07  | 4.61E-07  |
| Unigene4843  | Potri.T173400.2    | 40.1324  | 18.9905  | 1.0795 | Up | 7.54E-12  | 2.38E-11  |
| Unigene7038  | Potri.011G044000.1 | 12.2425  | 5.7936   | 1.0794 | Up | 9.76E-06  | 2.06E-05  |
| Unigene6042  | Potri.001G186800.3 | 86.1231  | 40.7729  | 1.0788 | Up | 1.52E-52  | 1.56E-51  |
| Unigene22482 | Potri.003G073400.1 | 39.7633  | 18.8272  | 1.0786 | Up | 1.27E-29  | 7.61E-29  |
| Unigene85961 | Potri.015G057100.4 | 43.8522  | 20.7714  | 1.0781 | Up | 1.30E-15  | 4.87E-15  |
| Unigene31826 | Potri.015G117400.1 | 9.9465   | 4.7131   | 1.0775 | Up | 5.27E-19  | 2.27E-18  |
| Unigene94680 | Potri.012G000800.1 | 39.1164  | 18.5382  | 1.0773 | Up | 2.52E-16  | 9.71E-16  |
| Unigene21723 | Potri.004G236000.1 | 48.8612  | 23.1597  | 1.0771 | Up | 1.80E-35  | 1.26E-34  |
| Unigene29846 | Potri.016G038900.1 | 31.3149  | 14.8445  | 1.0769 | Up | 1.39E-10  | 4.08E-10  |
| Unigene34287 | Potri.013G059500.2 | 8.5944   | 4.0741   | 1.0769 | Up | 1.99E-05  | 4.09E-05  |
| Unigene36918 | Potri.002G167700.5 | 25.2754  | 11.9851  | 1.0765 | Up | 5.35E-14  | 1.87E-13  |
| Unigene13799 | Potri.010G042600.1 | 21.7387  | 10.309   | 1.0764 | Up | 1.99E-20  | 9.00E-20  |
| Unigene38417 | Potri.010G104000.1 | 11.0263  | 5.2292   | 1.0763 | Up | 6.37E-10  | 1.81E-09  |
| Unigene32044 | Potri.006G248900.1 | 25.3851  | 12.0391  | 1.0763 | Up | 1.31E-41  | 1.07E-40  |
| Unigene32035 | Potri.013G023000.1 | 10.8422  | 5.1422   | 1.0762 | Up | 6.74E-09  | 1.80E-08  |
| Unigene94467 | Potri.012G015600.1 | 27.8192  | 13.1941  | 1.0762 | Up | 1.36E-37  | 1.01E-36  |
| Unigene33293 | Potri.005G049100.3 | 5.6926   | 2.7004   | 1.0759 | Up | 7.77E-07  | 1.81E-06  |
| Unigene41697 | Potri.018G067300.1 | 80.0843  | 38.0032  | 1.0754 | Up | 1.03E-39  | 8.00E-39  |
| Unigene92701 | Potri.001G423800.1 | 6.3041   | 2.9917   | 1.0753 | Up | 9.57E-05  | 1.84E-04  |
| Unigene43760 | Potri.009G050000.1 | 8.5891   | 4.0768   | 1.0751 | Up | 3.36E-07  | 8.00E-07  |
| Unigene36389 | Potri.001G009900.1 | 9.9512   | 4.7233   | 1.0751 | Up | 3.36E-07  | 8.01E-07  |

|               |                     |          |          |        |    |          |          |
|---------------|---------------------|----------|----------|--------|----|----------|----------|
| Unigene68926  | Potri.010G242700.1  | 11.7177  | 5.5622   | 1.075  | Up | 1.28E-09 | 3.56E-09 |
| Unigene12210  | Potri.005G069500.1  | 126.6651 | 60.1229  | 1.075  | Up | 1.41E-54 | 1.51E-53 |
| Unigene31220  | Potri.001G455700.1  | 4.8616   | 2.3081   | 1.0747 | Up | 1.36E-08 | 3.56E-08 |
| Unigene72205  | Potri.T082100.1     | 274.8578 | 130.5044 | 1.0746 | Up | 2.07E-62 | 2.56E-61 |
| Unigene3048   | Potri.014G149000.1  | 13.8051  | 6.559    | 1.0737 | Up | 5.93E-21 | 2.72E-20 |
| Unigene4578   | Potri.009G090700.1  | 4.2557   | 2.0227   | 1.0731 | Up | 4.67E-04 | 8.30E-04 |
| Unigene26021  | Potri.006G138600.3  | 8.8995   | 4.23     | 1.0731 | Up | 4.67E-04 | 8.30E-04 |
| Unigene47517  | Potri.013G076300.1  | 8.4828   | 4.032    | 1.073  | Up | 4.67E-04 | 8.30E-04 |
| Unigene108387 | Potri.010G118900.1  | 52.2554  | 24.8488  | 1.0724 | Up | 3.74E-13 | 1.26E-12 |
| Unigene31827  | Potri.006G168200.1  | 44.9148  | 21.3593  | 1.0723 | Up | 1.22E-84 | 2.14E-83 |
| Unigene50681  | Potri.006G214800.1  | 15.4776  | 7.361    | 1.0722 | Up | 2.13E-10 | 6.21E-10 |
| Unigene51922  | Potri.003G052200.3  | 20.3452  | 9.676    | 1.0722 | Up | 2.13E-10 | 6.21E-10 |
| Unigene95711  | Potri.T041600.1     | 15.5527  | 7.3987   | 1.0718 | Up | 9.30E-11 | 2.77E-10 |
| Unigene44251  | Potri.013G132700.1  | 3.4191   | 1.6265   | 1.0718 | Up | 1.97E-04 | 3.67E-04 |
| Unigene89746  | Potri.009G062400.1  | 7.912    | 3.7639   | 1.0718 | Up | 1.97E-04 | 3.67E-04 |
| Unigene9316   | Potri.005G093000.1  | 3.668    | 1.745    | 1.0718 | Up | 1.97E-04 | 3.67E-04 |
| Unigene90836  | Potri.003G193900.1  | 15.3531  | 7.3064   | 1.0713 | Up | 5.50E-08 | 1.39E-07 |
| Unigene51803  | Potri.002G139600.1  | 15.2759  | 7.2697   | 1.0713 | Up | 5.50E-08 | 1.39E-07 |
| Unigene15427  | Potri.013G102700.1  | 120.0579 | 57.1383  | 1.0712 | Up | 1.70E-34 | 1.16E-33 |
| Unigene91654  | Potri.009G163300.3  | 21.499   | 10.2323  | 1.0711 | Up | 1.78E-11 | 5.50E-11 |
| Unigene18619  | Potri.009G092900.1  | 13.8744  | 6.6048   | 1.0708 | Up | 4.27E-10 | 1.23E-09 |
| Unigene23937  | Potri.010G062700.1  | 15.0572  | 7.1719   | 1.07   | Up | 6.54E-13 | 2.17E-12 |
| Unigene9121   | Potri.016G028900.1  | 50.7094  | 24.1597  | 1.0697 | Up | 1.62E-19 | 7.08E-19 |
| Unigene10297  | Potri.007G008300.2  | 4.5494   | 2.1679   | 1.0694 | Up | 1.11E-07 | 2.74E-07 |
| Unigene84858  | Potri.005G257900.2  | 21.7471  | 10.3658  | 1.069  | Up | 4.81E-08 | 1.22E-07 |
| Unigene115605 | Potri.004G199600.3  | 98.4046  | 46.9056  | 1.069  | Up | 2.34E-32 | 1.51E-31 |
| Unigene15575  | Potri.010G233100.1  | 13.5353  | 6.4563   | 1.0679 | Up | 5.97E-12 | 1.89E-11 |
| Unigene59589  | Potri.017G009500.1  | 6.9073   | 3.2956   | 1.0676 | Up | 4.06E-04 | 7.27E-04 |
| Unigene31665  | Potri.010G207700.2  | 5.0698   | 2.4189   | 1.0676 | Up | 4.06E-04 | 7.27E-04 |
| Unigene24090  | Potri.008G119600.1  | 19.7302  | 9.4137   | 1.0676 | Up | 1.28E-26 | 7.03E-26 |
| Unigene9842   | Potri.001G369300.1  | 4.5487   | 2.1703   | 1.0676 | Up | 4.06E-04 | 7.27E-04 |
| Unigene3722   | Potri.015G072600.1  | 5.6667   | 2.7048   | 1.067  | Up | 1.71E-04 | 3.20E-04 |
| Unigene84037  | Potri.013G016100.1  | 10.7151  | 5.1145   | 1.067  | Up | 1.71E-04 | 3.20E-04 |
| Unigene57325  | Potri.006G245400.1  | 291.0474 | 138.9303 | 1.0669 | Up | 1.25E-84 | 2.19E-83 |
| Unigene16515  | Potri.003G051400.1  | 128.1861 | 61.2155  | 1.0663 | Up | 1.97E-42 | 1.63E-41 |
| Unigene64899  | Potri.002G155000.1  | 4.3802   | 2.092    | 1.0661 | Up | 3.09E-05 | 6.24E-05 |
| Unigene44634  | Potri.014G147400.11 | 14.1205  | 6.7454   | 1.0658 | Up | 6.56E-10 | 1.86E-09 |
| Unigene50959  | Potri.009G139100.1  | 3.5396   | 1.6909   | 1.0658 | Up | 1.32E-05 | 2.77E-05 |
| Unigene18336  | Potri.002G168600.1  | 9.9063   | 4.7331   | 1.0656 | Up | 1.25E-10 | 3.70E-10 |

|               |                    |          |         |        |    |          |          |
|---------------|--------------------|----------|---------|--------|----|----------|----------|
| Unigene6179   | Potri.003G116600.1 | 10.9433  | 5.2307  | 1.065  | Up | 4.53E-07 | 1.07E-06 |
| Unigene26100  | Potri.003G046100.1 | 38.7071  | 18.5004 | 1.065  | Up | 2.00E-12 | 6.50E-12 |
| Unigene49948  | Potri.004G068000.1 | 11.0871  | 5.3     | 1.0648 | Up | 1.96E-07 | 4.75E-07 |
| Unigene21965  | Potri.007G065000.1 | 33.6427  | 16.1036 | 1.0629 | Up | 1.28E-30 | 7.91E-30 |
| Unigene21054  | Potri.018G092100.4 | 23.5259  | 11.2649 | 1.0624 | Up | 9.58E-11 | 2.85E-10 |
| Unigene20303  | Potri.013G068400.2 | 5.3711   | 2.5719  | 1.0624 | Up | 6.33E-05 | 1.24E-04 |
| Unigene44335  | Potri.006G276200.1 | 4.8159   | 2.306   | 1.0624 | Up | 1.71E-07 | 4.17E-07 |
| Unigene21509  | Potri.001G049900.1 | 31.6235  | 15.1423 | 1.0624 | Up | 7.88E-57 | 8.84E-56 |
| Unigene118643 | Potri.008G174100.2 | 190.9801 | 91.4946 | 1.0617 | Up | 3.40E-95 | 6.83E-94 |
| Unigene43420  | Potri.009G096300.1 | 66.4329  | 31.8628 | 1.06   | Up | 4.92E-37 | 3.60E-36 |
| Unigene94630  | Potri.008G063200.1 | 10.265   | 4.9273  | 1.0589 | Up | 2.35E-05 | 4.80E-05 |
| Unigene45039  | Potri.011G132900.1 | 29.7452  | 14.2792 | 1.0587 | Up | 3.82E-36 | 2.73E-35 |
| Unigene1829   | Potri.007G127300.3 | 14.6335  | 7.026   | 1.0585 | Up | 1.07E-08 | 2.82E-08 |
| Unigene41212  | Potri.006G130300.2 | 28.2433  | 13.5604 | 1.0585 | Up | 1.07E-08 | 2.82E-08 |
| Unigene35992  | Potri.003G105600.1 | 12.083   | 5.8014  | 1.0585 | Up | 5.51E-05 | 1.08E-04 |
| Unigene111780 | Potri.010G141300.6 | 11.6956  | 5.6191  | 1.0576 | Up | 3.07E-04 | 5.58E-04 |
| Unigene44897  | Potri.005G070500.2 | 3.855    | 1.8521  | 1.0576 | Up | 3.07E-04 | 5.58E-04 |
| Unigene38009  | Potri.010G191300.1 | 133.0272 | 63.9657 | 1.0564 | Up | 1.50E-45 | 1.33E-44 |
| Unigene93464  | Potri.011G140800.1 | 6.6011   | 3.1762  | 1.0554 | Up | 2.05E-05 | 4.20E-05 |
| Unigene29887  | Potri.011G117500.1 | 47.4252  | 22.8199 | 1.0554 | Up | 1.76E-19 | 7.69E-19 |
| Unigene41631  | Potri.001G466100.1 | 4.1669   | 2.0049  | 1.0554 | Up | 2.05E-05 | 4.20E-05 |
| Unigene502    | Potri.001G172400.6 | 5.7401   | 2.7621  | 1.0553 | Up | 2.15E-11 | 6.62E-11 |
| Unigene13675  | Potri.012G003700.1 | 13.5335  | 6.5197  | 1.0537 | Up | 3.28E-06 | 7.25E-06 |
| Unigene7629   | Potri.019G034100.1 | 32.528   | 15.6729 | 1.0534 | Up | 2.54E-23 | 1.26E-22 |
| Unigene31040  | Potri.014G100900.4 | 9.534    | 4.5952  | 1.053  | Up | 7.64E-06 | 1.64E-05 |
| Unigene27039  | Potri.001G410600.1 | 17.4716  | 8.4209  | 1.053  | Up | 2.33E-13 | 7.88E-13 |
| Unigene1273   | Potri.004G075800.1 | 7.902    | 3.8102  | 1.0524 | Up | 5.32E-07 | 1.25E-06 |
| Unigene109347 | Potri.003G183700.1 | 70.0674  | 33.8006 | 1.0517 | Up | 3.68E-17 | 1.47E-16 |
| Unigene32542  | Potri.001G229200.1 | 21.9956  | 10.6137 | 1.0513 | Up | 2.55E-15 | 9.41E-15 |
| Unigene71276  | Potri.008G080800.5 | 17.7265  | 8.5543  | 1.0512 | Up | 4.18E-05 | 8.33E-05 |
| Unigene44462  | Potri.T159100.2    | 79.702   | 38.4836 | 1.0504 | Up | 5.68E-27 | 3.15E-26 |
| Unigene2797   | Potri.009G057200.2 | 70.1708  | 33.8852 | 1.0502 | Up | 2.46E-49 | 2.37E-48 |
| Unigene22406  | Potri.T137400.1    | 40.2713  | 19.4493 | 1.05   | Up | 1.48E-57 | 1.68E-56 |
| Unigene40244  | Potri.001G086300.1 | 3.4669   | 1.6744  | 1.05   | Up | 9.82E-05 | 1.89E-04 |
| Unigene11383  | Potri.010G164500.1 | 4.9107   | 2.373   | 1.0492 | Up | 1.08E-06 | 2.46E-06 |
| Unigene8340   | Potri.008G022000.1 | 15.925   | 7.6978  | 1.0488 | Up | 1.10E-11 | 3.44E-11 |
| Unigene23288  | Potri.006G258600.2 | 71.5418  | 34.5856 | 1.0486 | Up | 1.12E-28 | 6.56E-28 |
| Unigene31580  | Potri.T173600.2    | 28.0298  | 13.5536 | 1.0483 | Up | 2.52E-11 | 7.73E-11 |
| Unigene2921   | Potri.002G214700.1 | 4.5072   | 2.1794  | 1.0483 | Up | 2.50E-06 | 5.56E-06 |



|               |                    |          |         |        |    |          |          |
|---------------|--------------------|----------|---------|--------|----|----------|----------|
| Unigene13403  | Potri.014G192900.1 | 6.4355   | 3.1129  | 1.0478 | Up | 3.64E-05 | 7.29E-05 |
| Unigene43260  | Potri.001G171300.1 | 7.5366   | 3.6469  | 1.0472 | Up | 5.81E-06 | 1.25E-05 |
| Unigene77904  | Potri.014G160400.5 | 25.1852  | 12.1929 | 1.0465 | Up | 1.53E-07 | 3.75E-07 |
| Unigene103717 | Potri.003G102300.1 | 13.5496  | 6.5608  | 1.0463 | Up | 8.55E-05 | 1.65E-04 |
| Unigene97541  | Potri.T041100.1    | 12.8654  | 6.2319  | 1.0458 | Up | 2.18E-06 | 4.87E-06 |
| Unigene16602  | Potri.011G134900.1 | 14.2356  | 6.8957  | 1.0457 | Up | 2.18E-06 | 4.87E-06 |
| Unigene49842  | Potri.004G065800.3 | 5.0863   | 2.4638  | 1.0457 | Up | 2.18E-06 | 4.87E-06 |
| Unigene51603  | Potri.017G135500.1 | 35.4764  | 17.1872 | 1.0455 | Up | 1.62E-19 | 7.08E-19 |
| Unigene36635  | Potri.016G044600.1 | 12.7989  | 6.2051  | 1.0445 | Up | 8.19E-07 | 1.90E-06 |
| Unigene28444  | Potri.001G310500.2 | 21.2274  | 10.2913 | 1.0445 | Up | 2.82E-12 | 9.09E-12 |
| Unigene51647  | Potri.014G051900.1 | 8.036    | 3.8969  | 1.0442 | Up | 2.12E-20 | 9.55E-20 |
| Unigene76568  | Potri.005G209500.2 | 125.2082 | 60.7204 | 1.0441 | Up | 8.81E-31 | 5.47E-30 |
| Unigene29177  | Potri.009G062200.2 | 11.4432  | 5.5525  | 1.0433 | Up | 1.90E-06 | 4.28E-06 |
| Unigene22247  | Potri.001G348900.4 | 14.0832  | 6.8352  | 1.0429 | Up | 3.18E-09 | 8.66E-09 |
| Unigene48871  | Potri.012G079700.4 | 63.3762  | 30.7612 | 1.0428 | Up | 5.93E-31 | 3.69E-30 |
| Unigene96864  | Potri.009G138900.1 | 6.2857   | 3.0511  | 1.0427 | Up | 7.44E-05 | 1.45E-04 |
| Unigene11053  | Potri.010G224800.1 | 32.6001  | 15.8269 | 1.0425 | Up | 3.01E-35 | 2.10E-34 |
| Unigene3643   | Potri.013G046200.1 | 13.1755  | 6.3976  | 1.0423 | Up | 4.78E-04 | 8.48E-04 |
| Unigene46259  | Potri.010G048400.5 | 4.8681   | 2.3638  | 1.0423 | Up | 4.78E-04 | 8.48E-04 |
| Unigene43564  | Potri.005G062500.3 | 7.792    | 3.7846  | 1.0419 | Up | 4.41E-06 | 9.62E-06 |
| Unigene81991  | Potri.016G061900.1 | 22.1195  | 10.7472 | 1.0414 | Up | 2.70E-07 | 6.49E-07 |
| Unigene40510  | Potri.008G166800.1 | 29.9571  | 14.5553 | 1.0414 | Up | 2.78E-09 | 7.60E-09 |
| Unigene52399  | Potri.008G026100.1 | 6.0278   | 2.9297  | 1.0409 | Up | 1.66E-06 | 3.75E-06 |
| Unigene118693 | Potri.014G138200.1 | 182.6337 | 88.7813 | 1.0406 | Up | 1.51E-89 | 2.81E-88 |
| Unigene5538   | Potri.008G080800.5 | 38.716   | 18.8209 | 1.0406 | Up | 6.73E-11 | 2.02E-10 |
| Unigene48712  | Potri.013G050300.1 | 102.5438 | 49.8762 | 1.0398 | Up | 4.04E-34 | 2.74E-33 |
| Unigene5573   | Potri.013G079700.7 | 118.201  | 57.5064 | 1.0394 | Up | 1.58E-36 | 1.14E-35 |
| Unigene1071   | Potri.003G053000.1 | 6.9796   | 3.3959  | 1.0394 | Up | 3.77E-12 | 1.21E-11 |
| Unigene37971  | Potri.001G449000.1 | 8.1429   | 3.9619  | 1.0394 | Up | 6.47E-05 | 1.27E-04 |
| Unigene52438  | Potri.008G211100.1 | 7.5246   | 3.6611  | 1.0393 | Up | 6.47E-05 | 1.27E-04 |
| Unigene51063  | Potri.001G417200.1 | 10.9084  | 5.3075  | 1.0393 | Up | 6.47E-05 | 1.27E-04 |
| Unigene38658  | Potri.005G166500.1 | 21.0244  | 10.2331 | 1.0388 | Up | 1.52E-16 | 5.93E-16 |
| Unigene16078  | Potri.017G138300.1 | 7.6967   | 3.7474  | 1.0384 | Up | 2.40E-05 | 4.90E-05 |
| Unigene51312  | Potri.009G015800.4 | 34.265   | 16.6871 | 1.038  | Up | 3.70E-22 | 1.76E-21 |
| Unigene41547  | Potri.001G148800.1 | 15.9459  | 7.7681  | 1.0376 | Up | 8.96E-06 | 1.90E-05 |
| Unigene61528  | Potri.T025300.1    | 8.2173   | 4.0031  | 1.0375 | Up | 8.96E-06 | 1.90E-05 |
| Unigene17506  | Potri.013G006000.4 | 12.2255  | 5.9565  | 1.0374 | Up | 2.05E-07 | 4.98E-07 |
| Unigene70190  | Potri.013G101700.7 | 5.1448   | 2.5075  | 1.0369 | Up | 1.52E-04 | 2.86E-04 |
| Unigene61911  | Potri.006G268000.2 | 5.2219   | 2.5451  | 1.0369 | Up | 1.52E-04 | 2.86E-04 |

|               |                    |          |         |        |    |          |          |
|---------------|--------------------|----------|---------|--------|----|----------|----------|
| Unigene51163  | Potri.005G257900.2 | 4.382    | 2.1357  | 1.0369 | Up | 1.52E-04 | 2.86E-04 |
| Unigene33435  | Potri.004G023000.2 | 5.5553   | 2.7075  | 1.0369 | Up | 1.52E-04 | 2.86E-04 |
| Unigene44523  | Potri.013G066600.1 | 9.2219   | 4.4959  | 1.0365 | Up | 2.94E-08 | 7.56E-08 |
| Unigene11068  | Potri.016G024700.2 | 6.0931   | 2.9718  | 1.0358 | Up | 4.74E-07 | 1.12E-06 |
| Unigene68186  | Potri.002G097700.1 | 7.6772   | 3.7454  | 1.0355 | Up | 2.09E-05 | 4.29E-05 |
| Unigene24211  | Potri.005G024600.2 | 9.7543   | 4.7588  | 1.0354 | Up | 1.79E-07 | 4.36E-07 |
| Unigene33845  | Potri.002G170900.1 | 6.4351   | 3.1395  | 1.0354 | Up | 1.50E-11 | 4.67E-11 |
| Unigene57238  | Potri.016G056400.3 | 6.658    | 3.2497  | 1.0348 | Up | 2.57E-08 | 6.62E-08 |
| Unigene35037  | Potri.014G017400.1 | 15.2811  | 7.4612  | 1.0343 | Up | 6.83E-17 | 2.70E-16 |
| Unigene6273   | Potri.011G044700.1 | 16.7788  | 8.1931  | 1.0342 | Up | 1.10E-06 | 2.51E-06 |
| Unigene44331  | Potri.006G222800.2 | 21.314   | 10.409  | 1.034  | Up | 2.72E-15 | 1.00E-14 |
| Unigene13023  | Potri.012G105800.1 | 20.767   | 10.1434 | 1.0338 | Up | 5.83E-19 | 2.50E-18 |
| Unigene44970  | Potri.003G156600.1 | 11.6155  | 5.6741  | 1.0336 | Up | 1.56E-07 | 3.82E-07 |
| Unigene75081  | Potri.003G046100.1 | 14.6473  | 7.1563  | 1.0333 | Up | 1.32E-04 | 2.51E-04 |
| Unigene114776 | Potri.002G170900.1 | 33.921   | 16.5982 | 1.0312 | Up | 6.00E-11 | 1.81E-10 |
| Unigene1292   | Potri.009G140000.1 | 22.4513  | 10.9859 | 1.0311 | Up | 6.00E-11 | 1.81E-10 |
| Unigene33838  | Potri.017G050300.1 | 52.578   | 25.734  | 1.0308 | Up | 4.32E-29 | 2.56E-28 |
| Unigene1036   | Potri.008G131900.1 | 62.7521  | 30.7123 | 1.0308 | Up | 2.17E-52 | 2.22E-51 |
| Unigene10715  | Potri.002G197900.1 | 23.762   | 11.6299 | 1.0308 | Up | 4.30E-67 | 5.78E-66 |
| Unigene398    | Potri.004G074300.2 | 71.6743  | 35.0868 | 1.0305 | Up | 3.96E-83 | 6.78E-82 |
| Unigene67187  | Potri.005G062500.3 | 7.3832   | 3.6156  | 1.03   | Up | 3.13E-04 | 5.68E-04 |
| Unigene110799 | Potri.001G372600.1 | 107.1124 | 52.4541 | 1.03   | Up | 6.54E-26 | 3.52E-25 |
| Unigene112369 | Potri.014G170600.3 | 39.3032  | 19.2623 | 1.0289 | Up | 4.58E-11 | 1.39E-10 |
| Unigene32102  | Potri.001G139300.1 | 7.1551   | 3.5065  | 1.0289 | Up | 6.71E-12 | 2.12E-11 |
| Unigene38817  | Potri.007G124300.1 | 7.107    | 3.4852  | 1.028  | Up | 7.28E-07 | 1.69E-06 |
| Unigene48323  | Potri.010G156900.1 | 48.1387  | 23.6131 | 1.0276 | Up | 3.87E-24 | 1.97E-23 |
| Unigene4852   | Potri.008G074000.1 | 17.0464  | 8.3643  | 1.0272 | Up | 3.71E-05 | 7.42E-05 |
| Unigene42454  | Potri.004G227200.1 | 19.6165  | 9.6272  | 1.0269 | Up | 1.32E-32 | 8.62E-32 |
| Unigene110162 | Potri.013G079700.8 | 45.5696  | 22.3655 | 1.0268 | Up | 1.34E-11 | 4.16E-11 |
| Unigene28927  | Potri.010G001100.1 | 5.9415   | 2.9161  | 1.0268 | Up | 1.34E-11 | 4.16E-11 |
| Unigene6331   | Potri.017G125100.1 | 76.5003  | 37.5517 | 1.0266 | Up | 4.49E-33 | 2.97E-32 |
| Unigene112905 | Potri.005G243000.1 | 37.2995  | 18.3102 | 1.0265 | Up | 9.14E-11 | 2.73E-10 |
| Unigene4819   | Potri.004G033400.1 | 18.7247  | 9.199   | 1.0254 | Up | 4.49E-06 | 9.79E-06 |
| Unigene50916  | Potri.006G246800.1 | 64.1086  | 31.4993 | 1.0252 | Up | 3.91E-26 | 2.12E-25 |
| Unigene64576  | Potri.014G024800.2 | 6.7709   | 3.3274  | 1.025  | Up | 1.20E-05 | 2.52E-05 |
| Unigene109883 | Potri.002G196200.2 | 140.6433 | 69.1259 | 1.0247 | Up | 3.96E-32 | 2.55E-31 |
| Unigene76232  | Potri.005G133800.1 | 93.0002  | 45.7218 | 1.0244 | Up | 2.01E-22 | 9.66E-22 |
| Unigene87503  | Potri.012G053700.2 | 29.6514  | 14.5782 | 1.0243 | Up | 6.98E-11 | 2.09E-10 |
| Unigene32249  | Potri.004G095600.1 | 30.5686  | 15.0341 | 1.0238 | Up | 4.06E-36 | 2.90E-35 |

|               |                    |          |         |        |    |          |          |
|---------------|--------------------|----------|---------|--------|----|----------|----------|
| Unigene19804  | Potri.018G113400.2 | 13.0227  | 6.4088  | 1.0229 | Up | 2.36E-04 | 4.34E-04 |
| Unigene43238  | Potri.018G128200.1 | 13.8874  | 6.8351  | 1.0227 | Up | 1.78E-32 | 1.16E-31 |
| Unigene103320 | Potri.015G023400.1 | 19.2885  | 9.4958  | 1.0224 | Up | 4.82E-07 | 1.14E-06 |
| Unigene9347   | Potri.001G113000.4 | 30.7586  | 15.1423 | 1.0224 | Up | 1.18E-22 | 5.71E-22 |
| Unigene53000  | Potri.017G079000.1 | 13.2941  | 6.5475  | 1.0218 | Up | 6.01E-08 | 1.51E-07 |
| Unigene19074  | Potri.015G125300.1 | 10.9705  | 5.4031  | 1.0218 | Up | 6.01E-08 | 1.51E-07 |
| Unigene5472   | Potri.001G105900.1 | 123.8744 | 61.017  | 1.0216 | Up | 2.79E-38 | 2.10E-37 |
| Unigene34822  | Potri.010G222800.2 | 38.4287  | 18.9369 | 1.021  | Up | 2.82E-39 | 2.17E-38 |
| Unigene70992  | Potri.001G171000.3 | 17.4436  | 8.5968  | 1.0208 | Up | 7.56E-05 | 1.47E-04 |
| Unigene18605  | Potri.009G078500.3 | 32.8825  | 16.2151 | 1.02   | Up | 7.91E-24 | 3.99E-23 |
| Unigene44263  | Potri.004G236600.2 | 78.9611  | 38.9384 | 1.0199 | Up | 7.57E-67 | 1.01E-65 |
| Unigene43734  | Potri.016G042400.1 | 44.6088  | 22.0004 | 1.0198 | Up | 2.04E-23 | 1.02E-22 |
| Unigene8409   | Potri.012G079700.4 | 14.2218  | 7.0156  | 1.0195 | Up | 1.36E-11 | 4.23E-11 |
| Unigene2198   | Potri.001G073100.2 | 13.2466  | 6.5348  | 1.0194 | Up | 1.74E-08 | 4.53E-08 |
| Unigene3659   | Potri.015G140500.1 | 18.5789  | 9.1677  | 1.019  | Up | 2.97E-06 | 6.57E-06 |
| Unigene68269  | Potri.010G001600.1 | 6.9308   | 3.42    | 1.019  | Up | 2.97E-06 | 6.57E-06 |
| Unigene34934  | Potri.010G090800.1 | 10.9554  | 5.408   | 1.0185 | Up | 1.52E-12 | 4.97E-12 |
| Unigene9504   | Potri.002G060700.1 | 3.3995   | 1.6786  | 1.0181 | Up | 5.60E-04 | 9.89E-04 |
| Unigene37507  | Potri.001G184000.4 | 70.7347  | 34.9358 | 1.0177 | Up | 4.81E-17 | 1.91E-16 |
| Unigene10893  | Potri.009G047700.5 | 35.0851  | 17.3331 | 1.0173 | Up | 8.30E-50 | 8.07E-49 |
| Unigene9194   | Potri.T159100.1    | 89.8164  | 44.3763 | 1.0172 | Up | 2.09E-30 | 1.29E-29 |
| Unigene27979  | Potri.014G130300.1 | 14.2186  | 7.0298  | 1.0162 | Up | 8.47E-07 | 1.96E-06 |
| Unigene45186  | Potri.010G237300.1 | 4.6984   | 2.3243  | 1.0154 | Up | 5.71E-05 | 1.12E-04 |
| Unigene21811  | Potri.003G095100.1 | 7.4648   | 3.6937  | 1.015  | Up | 8.88E-13 | 2.93E-12 |
| Unigene43113  | Potri.019G044800.1 | 7.6804   | 3.8008  | 1.0149 | Up | 3.83E-09 | 1.04E-08 |
| Unigene108213 | Potri.015G016500.1 | 33.4972  | 16.5813 | 1.0145 | Up | 3.04E-08 | 7.80E-08 |
| Unigene106260 | Potri.007G044800.1 | 7.2445   | 3.5861  | 1.0145 | Up | 4.86E-04 | 8.60E-04 |
| Unigene92562  | Potri.007G122700.1 | 9.5168   | 4.7131  | 1.0138 | Up | 6.01E-06 | 1.30E-05 |
| Unigene12687  | Potri.T177900.1    | 10.8895  | 5.394   | 1.0135 | Up | 8.01E-08 | 2.00E-07 |
| Unigene17682  | Potri.014G087500.1 | 6.7747   | 3.3558  | 1.0135 | Up | 1.55E-04 | 2.90E-04 |
| Unigene8089   | Potri.009G069400.1 | 4.1077   | 2.0347  | 1.0135 | Up | 1.55E-04 | 2.90E-04 |
| Unigene42849  | Potri.011G072200.1 | 31.3805  | 15.5471 | 1.0132 | Up | 2.51E-48 | 2.36E-47 |
| Unigene52778  | Potri.001G137000.1 | 65.5054  | 32.4637 | 1.0128 | Up | 1.45E-32 | 9.43E-32 |
| Unigene8361   | Potri.016G119600.1 | 15.5218  | 7.6937  | 1.0125 | Up | 4.12E-11 | 1.25E-10 |
| Unigene15154  | Potri.009G163200.3 | 6.2716   | 3.1117  | 1.0111 | Up | 4.21E-04 | 7.51E-04 |
| Unigene25985  | Potri.008G191400.1 | 21.9845  | 10.9112 | 1.0107 | Up | 9.60E-18 | 3.93E-17 |
| Unigene6223   | Potri.005G024200.2 | 16.1149  | 7.998   | 1.0107 | Up | 1.34E-04 | 2.54E-04 |
| Unigene10884  | Potri.001G152300.1 | 6.5699   | 3.263   | 1.0097 | Up | 9.17E-12 | 2.87E-11 |
| Unigene42580  | Potri.005G221300.1 | 18.5868  | 9.2317  | 1.0096 | Up | 1.13E-33 | 7.58E-33 |

|              |                    |         |          |         |      |          |          |
|--------------|--------------------|---------|----------|---------|------|----------|----------|
| Unigene48669 | Potri.001G243300.1 | 48.0929 | 23.8896  | 1.0094  | Up   | 2.45E-25 | 1.29E-24 |
| Unigene89307 | Potri.014G171900.1 | 9.6428  | 4.7948   | 1.008   | Up   | 1.17E-04 | 2.22E-04 |
| Unigene65508 | Potri.008G100200.1 | 7.5568  | 3.7576   | 1.008   | Up   | 3.65E-04 | 6.60E-04 |
| Unigene15746 | Potri.001G149800.1 | 10.1726 | 5.0583   | 1.008   | Up   | 1.22E-05 | 2.55E-05 |
| Unigene47316 | Potri.014G095900.1 | 193.054 | 96.0245  | 1.0075  | Up   | 4.25E-80 | 6.98E-79 |
| Unigene38904 | Potri.014G065400.1 | 39.0704 | 19.4368  | 1.0073  | Up   | 2.59E-14 | 9.16E-14 |
| Unigene34191 | Potri.014G197800.1 | 10.4794 | 5.2145   | 1.007   | Up   | 4.91E-10 | 1.40E-09 |
| Unigene18056 | Potri.001G077800.1 | 7.2988  | 3.6335   | 1.0063  | Up   | 1.13E-06 | 2.58E-06 |
| Unigene31118 | Potri.006G115100.3 | 9.1346  | 4.5479   | 1.0061  | Up   | 3.45E-06 | 7.61E-06 |
| Unigene13316 | Potri.009G053400.4 | 3.8586  | 1.9221   | 1.0054  | Up   | 1.01E-04 | 1.95E-04 |
| Unigene14852 | Potri.015G075000.2 | 3.73    | 1.8586   | 1.005   | Up   | 3.17E-04 | 5.74E-04 |
| Unigene4045  | Potri.008G060100.1 | 8.8283  | 4.399    | 1.005   | Up   | 3.17E-04 | 5.74E-04 |
| Unigene68696 | Potri.011G125500.3 | 8.6623  | 4.318    | 1.0044  | Up   | 3.00E-06 | 6.65E-06 |
| Unigene39416 | Potri.002G081600.1 | 6.1741  | 3.0785   | 1.004   | Up   | 9.20E-06 | 1.95E-05 |
| Unigene13106 | Potri.002G143100.1 | 59.1812 | 29.516   | 1.0036  | Up   | 2.08E-37 | 1.53E-36 |
| Unigene7397  | Potri.008G044800.4 | 10.4219 | 5.2004   | 1.0029  | Up   | 8.79E-05 | 1.70E-04 |
| Unigene52872 | Potri.007G106500.2 | 10.7486 | 5.3634   | 1.0029  | Up   | 9.27E-12 | 2.90E-11 |
| Unigene36452 | Potri.010G130300.2 | 22.2067 | 11.082   | 1.0028  | Up   | 8.55E-10 | 2.41E-09 |
| Unigene5741  | Potri.013G046700.3 | 5.0305  | 2.5116   | 1.0021  | Up   | 2.75E-04 | 5.02E-04 |
| Unigene18911 | Potri.001G028500.1 | 8.8315  | 4.4119   | 1.0013  | Up   | 7.06E-08 | 1.77E-07 |
| Unigene34568 | Potri.001G239900.2 | 7.5107  | 3.7527   | 1.001   | Up   | 6.75E-09 | 1.80E-08 |
| Unigene50056 | Potri.017G138900.6 | 60.9859 | 30.4731  | 1.0009  | Up   | 3.34E-61 | 4.05E-60 |
| Unigene15174 | Potri.016G045600.2 | 22.4754 | 11.2312  | 1.0008  | Up   | 6.51E-10 | 1.85E-09 |
| Unigene31520 | Potri.004G222900.2 | 9.5484  | 4.7714   | 1.0008  | Up   | 6.51E-10 | 1.85E-09 |
| Unigene77596 | Potri.013G117000.1 | 29.1001 | 58.1993  | -1      | Down | 1.32E-14 | 4.71E-14 |
| Unigene53358 | Potri.013G081400.1 | 18.3957 | 36.7908  | -1      | Down | 1.32E-14 | 4.71E-14 |
| Unigene84047 | Potri.010G086700.1 | 25.4993 | 50.9987  | -1      | Down | 4.08E-15 | 1.49E-14 |
| Unigene1735  | Potri.019G036700.6 | 28.3188 | 56.6407  | -1.0001 | Down | 1.05E-32 | 6.88E-32 |
| Unigene31440 | Potri.013G161700.5 | 17.9038 | 35.8095  | -1.0001 | Down | 3.81E-17 | 1.52E-16 |
| Unigene10747 | Potri.014G031000.1 | 13.7026 | 27.4112  | -1.0003 | Down | 7.57E-61 | 9.13E-60 |
| Unigene32858 | Potri.010G080700.4 | 22.9338 | 45.8786  | -1.0003 | Down | 8.39E-34 | 5.64E-33 |
| Unigene446   | Potri.006G039600.1 | 9.0915  | 18.1866  | -1.0003 | Down | 2.92E-28 | 1.68E-27 |
| Unigene86961 | Potri.005G180500.2 | 54.8026 | 109.6315 | -1.0003 | Down | 2.63E-34 | 1.79E-33 |
| Unigene43436 | Potri.013G085500.1 | 28.1165 | 56.2482  | -1.0004 | Down | 7.59E-41 | 6.08E-40 |
| Unigene25607 | Potri.019G072300.1 | 6.2663  | 12.5378  | -1.0006 | Down | 2.13E-04 | 3.93E-04 |
| Unigene13779 | Potri.018G103700.3 | 11.6842 | 23.378   | -1.0006 | Down | 1.07E-14 | 3.83E-14 |
| Unigene19034 | Potri.014G075500.1 | 14.6595 | 29.3309  | -1.0006 | Down | 2.83E-20 | 1.27E-19 |
| Unigene37637 | Potri.013G085000.1 | 26.9293 | 53.8806  | -1.0006 | Down | 3.58E-13 | 1.20E-12 |
| Unigene13047 | Potri.013G010700.2 | 6.8944  | 13.7944  | -1.0006 | Down | 3.09E-17 | 1.24E-16 |

|               |                    |         |          |         |      |           |           |
|---------------|--------------------|---------|----------|---------|------|-----------|-----------|
| Unigene53740  | Potri.009G119500.1 | 11.9132 | 23.8361  | -1.0006 | Down | 1.55E-07  | 3.78E-07  |
| Unigene29087  | Potri.009G033900.1 | 5.34    | 10.6843  | -1.0006 | Down | 3.92E-11  | 1.19E-10  |
| Unigene40710  | Potri.009G025700.1 | 14.7393 | 29.4908  | -1.0006 | Down | 1.44E-08  | 3.76E-08  |
| Unigene93755  | Potri.008G145600.1 | 2.4555  | 4.9129   | -1.0006 | Down | 2.13E-04  | 3.93E-04  |
| Unigene97684  | Potri.008G074800.1 | 5.3421  | 10.6886  | -1.0006 | Down | 1.87E-05  | 3.85E-05  |
| Unigene42141  | Potri.006G224500.4 | 18.9029 | 37.8214  | -1.0006 | Down | 1.35E-09  | 3.76E-09  |
| Unigene41366  | Potri.006G182000.2 | 8.8294  | 17.666   | -1.0006 | Down | 1.44E-08  | 3.76E-08  |
| Unigene48047  | Potri.004G063600.2 | 15.2837 | 30.58    | -1.0006 | Down | 1.55E-07  | 3.78E-07  |
| Unigene23803  | Potri.004G001400.1 | 3.3134  | 6.6295   | -1.0006 | Down | 1.68E-06  | 3.81E-06  |
| Unigene20462  | Potri.003G143200.1 | 10.0878 | 20.1839  | -1.0006 | Down | 4.14E-10  | 1.19E-09  |
| Unigene118447 | Potri.001G439800.1 | 7.662   | 15.3302  | -1.0006 | Down | 4.71E-08  | 1.19E-07  |
| Unigene38260  | Potri.001G162900.1 | 9.8958  | 19.7997  | -1.0006 | Down | 4.71E-08  | 1.19E-07  |
| Unigene31453  | Potri.010G240300.1 | 42.1496 | 84.3516  | -1.0009 | Down | 6.13E-28  | 3.51E-27  |
| Unigene26635  | Potri.007G009100.2 | 31.1829 | 62.4098  | -1.001  | Down | 2.30E-20  | 1.03E-19  |
| Unigene44793  | Potri.010G057200.3 | 14.8014 | 29.6251  | -1.0011 | Down | 7.80E-18  | 3.20E-17  |
| Unigene13154  | Potri.001G127700.2 | 16.8837 | 33.7921  | -1.0011 | Down | 7.57E-19  | 3.23E-18  |
| Unigene42687  | Potri.010G093900.2 | 5.2101  | 10.429   | -1.0012 | Down | 2.78E-14  | 9.82E-14  |
| Unigene33106  | Potri.008G205700.1 | 9.5556  | 19.1275  | -1.0012 | Down | 2.78E-14  | 9.82E-14  |
| Unigene52212  | Potri.004G188900.1 | 50.6759 | 101.433  | -1.0012 | Down | 2.23E-58  | 2.57E-57  |
| Unigene21750  | Potri.001G264100.1 | 25.4573 | 50.9573  | -1.0012 | Down | 2.34E-53  | 2.45E-52  |
| Unigene39737  | Potri.008G066500.3 | 8.9908  | 17.9983  | -1.0013 | Down | 3.03E-12  | 9.72E-12  |
| Unigene7004   | Potri.007G093600.2 | 18.4627 | 36.9596  | -1.0013 | Down | 3.03E-12  | 9.72E-12  |
| Unigene6061   | Potri.001G148900.3 | 24.3186 | 48.6825  | -1.0013 | Down | 3.03E-12  | 9.72E-12  |
| Unigene91694  | Potri.018G084500.1 | 32.7445 | 65.5556  | -1.0015 | Down | 3.96E-29  | 2.35E-28  |
| Unigene20455  | Potri.017G129900.6 | 13.5635 | 27.1555  | -1.0015 | Down | 3.35E-10  | 9.67E-10  |
| Unigene11643  | Potri.008G215100.2 | 7.1582  | 14.3308  | -1.0015 | Down | 1.86E-20  | 8.42E-20  |
| Unigene2501   | Potri.002G145900.1 | 51.7522 | 103.6086 | -1.0015 | Down | 1.22E-103 | 2.71E-102 |
| Unigene32669  | Potri.015G146300.1 | 6.5044  | 13.0245  | -1.0017 | Down | 1.44E-22  | 6.95E-22  |
| Unigene10864  | Potri.004G095000.2 | 6.1069  | 12.2284  | -1.0017 | Down | 4.49E-23  | 2.21E-22  |
| Unigene17620  | Potri.004G065900.2 | 14.3683 | 28.7707  | -1.0017 | Down | 1.16E-08  | 3.05E-08  |
| Unigene7880   | Potri.009G126200.2 | 10.7236 | 21.474   | -1.0018 | Down | 6.99E-15  | 2.53E-14  |
| Unigene52767  | Potri.007G093600.2 | 12.6818 | 25.397   | -1.0019 | Down | 1.25E-07  | 3.07E-07  |
| Unigene47923  | Potri.002G035300.1 | 33.2744 | 66.6381  | -1.0019 | Down | 1.55E-19  | 6.79E-19  |
| Unigene98142  | Potri.002G032600.7 | 13.7249 | 27.486   | -1.0019 | Down | 1.25E-07  | 3.07E-07  |
| Unigene8991   | Potri.014G004900.3 | 11.7788 | 23.5905  | -1.002  | Down | 4.11E-07  | 9.75E-07  |
| Unigene57670  | Potri.011G014200.1 | 7.9059  | 15.8338  | -1.002  | Down | 4.11E-07  | 9.75E-07  |
| Unigene73857  | Potri.005G123500.3 | 40.977  | 82.0684  | -1.002  | Down | 1.60E-18  | 6.72E-18  |
| Unigene21347  | Potri.002G112300.2 | 6.2007  | 12.4187  | -1.002  | Down | 8.18E-30  | 4.94E-29  |
| Unigene36959  | Potri.014G124100.1 | 30.0582 | 60.2042  | -1.0021 | Down | 1.65E-17  | 6.67E-17  |

|               |                    |          |          |         |      |           |           |
|---------------|--------------------|----------|----------|---------|------|-----------|-----------|
| Unigene48146  | Potri.006G208300.2 | 24.4456  | 48.9641  | -1.0021 | Down | 5.29E-17  | 2.10E-16  |
| Unigene23488  | Potri.011G116300.4 | 4.9636   | 9.9425   | -1.0022 | Down | 1.70E-16  | 6.60E-16  |
| Unigene44014  | Potri.004G032800.2 | 9.7262   | 19.4822  | -1.0022 | Down | 1.70E-16  | 6.60E-16  |
| Unigene35290  | Potri.002G162400.4 | 25.5273  | 51.1327  | -1.0022 | Down | 1.70E-16  | 6.60E-16  |
| Unigene11357  | Potri.016G129900.2 | 37.6305  | 75.3791  | -1.0023 | Down | 4.22E-59  | 4.94E-58  |
| Unigene46663  | Potri.010G162600.1 | 23.5378  | 47.1528  | -1.0024 | Down | 2.88E-24  | 1.48E-23  |
| Unigene82815  | Potri.001G168200.1 | 42.2446  | 84.6325  | -1.0024 | Down | 2.95E-23  | 1.46E-22  |
| Unigene16988  | Potri.019G038600.2 | 6.2902   | 12.6025  | -1.0025 | Down | 1.50E-05  | 3.12E-05  |
| Unigene65075  | Potri.007G070900.1 | 5.1855   | 10.3893  | -1.0025 | Down | 1.50E-05  | 3.12E-05  |
| Unigene5188   | Potri.002G202800.3 | 8.305    | 16.6392  | -1.0025 | Down | 1.50E-05  | 3.12E-05  |
| Unigene11376  | Potri.012G048400.1 | 3.1327   | 6.277    | -1.0027 | Down | 2.87E-09  | 7.86E-09  |
| Unigene39733  | Potri.002G115400.1 | 13.3092  | 26.6684  | -1.0027 | Down | 6.13E-13  | 2.04E-12  |
| Unigene42210  | Potri.015G141400.1 | 15.413   | 30.8861  | -1.0028 | Down | 9.38E-09  | 2.49E-08  |
| Unigene53518  | Potri.013G087900.2 | 9.0533   | 18.1419  | -1.0028 | Down | 5.04E-05  | 9.98E-05  |
| Unigene45405  | Potri.011G075100.1 | 20.1983  | 40.4754  | -1.0028 | Down | 3.32E-34  | 2.25E-33  |
| Unigene86764  | Potri.011G110900.6 | 98.4903  | 197.3803 | -1.0029 | Down | 4.69E-60  | 5.58E-59  |
| Unigene34094  | Potri.019G049700.2 | 10.8392  | 21.7241  | -1.003  | Down | 2.08E-11  | 6.41E-11  |
| Unigene3321   | Potri.013G152800.2 | 8.6176   | 17.2723  | -1.0031 | Down | 8.05E-21  | 3.68E-20  |
| Unigene2775   | Potri.014G137700.2 | 24.0447  | 48.2022  | -1.0034 | Down | 4.26E-39  | 3.27E-38  |
| Unigene50202  | Potri.001G237400.1 | 4.9607   | 9.9448   | -1.0034 | Down | 3.31E-07  | 7.91E-07  |
| Unigene93785  | Potri.010G125400.5 | 89.4842  | 179.3982 | -1.0035 | Down | 2.83E-113 | 7.08E-112 |
| Unigene20564  | Potri.010G021500.1 | 15.2108  | 30.4952  | -1.0035 | Down | 7.12E-10  | 2.02E-09  |
| Unigene50363  | Potri.008G055300.2 | 7.7427   | 15.5228  | -1.0035 | Down | 7.12E-10  | 2.02E-09  |
| Unigene115199 | Potri.001G373200.2 | 15.1037  | 30.2804  | -1.0035 | Down | 7.12E-10  | 2.02E-09  |
| Unigene32563  | Potri.003G171000.1 | 15.5493  | 31.1764  | -1.0036 | Down | 1.22E-25  | 6.52E-25  |
| Unigene22891  | Potri.008G001100.1 | 7.9643   | 15.9692  | -1.0037 | Down | 1.20E-14  | 4.30E-14  |
| Unigene12062  | Potri.008G194700.1 | 20.4602  | 41.0312  | -1.0039 | Down | 1.15E-35  | 8.11E-35  |
| Unigene8442   | Potri.018G051800.1 | 6.7021   | 13.4414  | -1.004  | Down | 1.69E-20  | 7.67E-20  |
| Unigene39751  | Potri.016G089300.1 | 41.2676  | 82.7644  | -1.004  | Down | 2.28E-39  | 1.76E-38  |
| Unigene29268  | Potri.012G073800.1 | 6.7534   | 13.5443  | -1.004  | Down | 5.45E-11  | 1.65E-10  |
| Unigene71675  | Potri.010G039900.1 | 11.8847  | 23.8353  | -1.004  | Down | 3.63E-06  | 7.99E-06  |
| Unigene93479  | Potri.009G015100.1 | 144.0887 | 289.0032 | -1.0041 | Down | 9.54E-165 | 3.89E-163 |
| Unigene9542   | Potri.009G100100.2 | 7.1398   | 14.3234  | -1.0044 | Down | 1.21E-05  | 2.54E-05  |
| Unigene9570   | Potri.018G090900.3 | 13.7629  | 27.6139  | -1.0046 | Down | 1.36E-11  | 4.23E-11  |
| Unigene31966  | Potri.018G036600.1 | 6.0836   | 12.2064  | -1.0046 | Down | 1.96E-35  | 1.37E-34  |
| Unigene89671  | Potri.015G084000.2 | 61.5804  | 123.5612 | -1.0047 | Down | 6.12E-45  | 5.36E-44  |
| Unigene14620  | Potri.014G076800.1 | 24.4587  | 49.0787  | -1.0047 | Down | 3.25E-13  | 1.10E-12  |
| Unigene22152  | Potri.014G135600.1 | 5.235    | 10.5046  | -1.0048 | Down | 2.67E-07  | 6.44E-07  |
| Unigene40655  | Potri.002G187000.3 | 6.0582   | 12.1579  | -1.0049 | Down | 4.05E-05  | 8.09E-05  |

|               |                    |         |         |         |      |          |          |
|---------------|--------------------|---------|---------|---------|------|----------|----------|
| Unigene71334  | Potri.001G380400.4 | 9.3708  | 18.8059 | -1.0049 | Down | 4.05E-05 | 8.09E-05 |
| Unigene15892  | Potri.009G093000.1 | 4.0821  | 8.1923  | -1.005  | Down | 4.05E-05 | 8.10E-05 |
| Unigene1968   | Potri.005G177400.4 | 19.5659 | 39.2687 | -1.005  | Down | 2.18E-23 | 1.08E-22 |
| Unigene560    | Potri.001G248800.2 | 12.6495 | 25.3861 | -1.005  | Down | 1.66E-62 | 2.06E-61 |
| Unigene48968  | Potri.011G167300.1 | 21.8167 | 43.7867 | -1.0051 | Down | 1.14E-19 | 5.03E-19 |
| Unigene12399  | Potri.002G049800.2 | 7.9153  | 15.8872 | -1.0051 | Down | 8.82E-07 | 2.04E-06 |
| Unigene55908  | Potri.001G294900.1 | 6.4343  | 12.9142 | -1.0051 | Down | 6.14E-16 | 2.33E-15 |
| Unigene28798  | Potri.001G121200.1 | 3.3616  | 6.7471  | -1.0051 | Down | 8.82E-07 | 2.04E-06 |
| Unigene7803   | Potri.008G078800.1 | 15.3057 | 30.7229 | -1.0052 | Down | 3.47E-62 | 4.29E-61 |
| Unigene44114  | Potri.002G086000.2 | 8.0084  | 16.0741 | -1.0052 | Down | 8.82E-07 | 2.04E-06 |
| Unigene632    | Potri.011G118000.2 | 6.3668  | 12.7803 | -1.0053 | Down | 4.81E-17 | 1.91E-16 |
| Unigene33589  | Potri.011G082000.1 | 9.446   | 18.9619 | -1.0053 | Down | 4.66E-10 | 1.33E-09 |
| Unigene43086  | Potri.005G101700.1 | 2.7089  | 5.4378  | -1.0053 | Down | 4.66E-10 | 1.33E-09 |
| Unigene13663  | Potri.006G061800.2 | 6.2692  | 12.5852 | -1.0054 | Down | 1.10E-11 | 3.44E-11 |
| Unigene110718 | Potri.006G022000.1 | 30.2027 | 60.6334 | -1.0054 | Down | 6.36E-15 | 2.31E-14 |
| Unigene4479   | Potri.015G104600.1 | 21.7103 | 43.5855 | -1.0055 | Down | 3.78E-18 | 1.57E-17 |
| Unigene84     | Potri.002G001000.1 | 5.3441  | 10.7292 | -1.0055 | Down | 5.65E-23 | 2.77E-22 |
| Unigene4447   | Potri.009G117500.1 | 23.0341 | 46.2482 | -1.0056 | Down | 2.05E-14 | 7.28E-14 |
| Unigene87527  | Potri.001G267800.1 | 38.8292 | 77.9618 | -1.0056 | Down | 1.11E-25 | 5.94E-25 |
| Unigene9816   | Potri.001G102900.7 | 14.447  | 29.0069 | -1.0056 | Down | 1.52E-09 | 4.21E-09 |
| Unigene32285  | Potri.019G059200.2 | 7.9811  | 16.0273 | -1.0059 | Down | 4.58E-23 | 2.25E-22 |
| Unigene679    | Potri.018G090700.4 | 12.5899 | 25.283  | -1.0059 | Down | 5.60E-29 | 3.30E-28 |
| Unigene53340  | Potri.001G357600.1 | 13.4364 | 26.9831 | -1.0059 | Down | 1.16E-10 | 3.43E-10 |
| Unigene39831  | Potri.014G093200.1 | 8.5565  | 17.1839 | -1.006  | Down | 4.95E-09 | 1.34E-08 |
| Unigene47703  | Potri.002G023800.1 | 6.5755  | 13.2058 | -1.006  | Down | 1.47E-22 | 7.09E-22 |
| Unigene24272  | Potri.014G004900.3 | 16.9543 | 34.053  | -1.0061 | Down | 4.69E-22 | 2.23E-21 |
| Unigene1086   | Potri.003G106000.1 | 8.8159  | 17.7068 | -1.0061 | Down | 2.84E-32 | 1.83E-31 |
| Unigene27099  | Potri.012G000700.1 | 9.9129  | 19.9116 | -1.0062 | Down | 9.73E-06 | 2.06E-05 |
| Unigene21389  | Potri.008G145800.3 | 8.5268  | 17.1266 | -1.0062 | Down | 1.13E-30 | 7.02E-30 |
| Unigene22765  | Potri.007G056800.6 | 3.4093  | 6.848   | -1.0062 | Down | 3.76E-10 | 1.08E-09 |
| Unigene31211  | Potri.010G094700.1 | 40.1488 | 80.6495 | -1.0063 | Down | 2.95E-24 | 1.51E-23 |
| Unigene13037  | Potri.003G133800.1 | 8.9762  | 18.0313 | -1.0063 | Down | 6.09E-20 | 2.71E-19 |
| Unigene25513  | Potri.016G063200.4 | 9.919   | 19.9256 | -1.0064 | Down | 1.62E-08 | 4.23E-08 |
| Unigene1915   | Potri.014G078900.2 | 15.8471 | 31.835  | -1.0064 | Down | 2.48E-18 | 1.04E-17 |
| Unigene17720  | Potri.001G049400.3 | 12.221  | 24.55   | -1.0064 | Down | 1.62E-08 | 4.23E-08 |
| Unigene10228  | Potri.008G106800.1 | 18.5407 | 37.2477 | -1.0065 | Down | 5.35E-14 | 1.87E-13 |
| Unigene11347  | Potri.007G010700.2 | 10.4211 | 20.9383 | -1.0066 | Down | 8.45E-58 | 9.64E-57 |
| Unigene23305  | Potri.017G041100.2 | 16.8776 | 33.9119 | -1.0067 | Down | 3.26E-16 | 1.25E-15 |
| Unigene52729  | Potri.009G149400.2 | 12.2709 | 24.6567 | -1.0067 | Down | 9.37E-11 | 2.79E-10 |

|               |                    |         |          |         |      |          |          |
|---------------|--------------------|---------|----------|---------|------|----------|----------|
| Unigene65806  | Potri.005G258700.4 | 9.6882  | 19.4663  | -1.0067 | Down | 3.26E-16 | 1.25E-15 |
| Unigene31138  | Potri.015G001900.1 | 14.5279 | 29.1925  | -1.0068 | Down | 2.56E-17 | 1.03E-16 |
| Unigene28539  | Potri.002G149800.1 | 10.7432 | 21.5882  | -1.0068 | Down | 5.30E-08 | 1.34E-07 |
| Unigene25874  | Potri.003G007700.5 | 63.4777 | 127.5604 | -1.0069 | Down | 9.54E-29 | 5.59E-28 |
| Unigene4511   | Potri.008G062100.1 | 6.8779  | 13.8226  | -1.007  | Down | 3.26E-05 | 6.56E-05 |
| Unigene45971  | Potri.005G257400.4 | 9.4154  | 18.9222  | -1.007  | Down | 3.26E-05 | 6.56E-05 |
| Unigene10092  | Potri.003G080300.2 | 6.0049  | 12.068   | -1.007  | Down | 3.26E-05 | 6.56E-05 |
| Unigene3116   | Potri.002G097900.1 | 8.3896  | 16.8611  | -1.007  | Down | 2.42E-29 | 1.44E-28 |
| Unigene7605   | Potri.008G106800.1 | 12.4126 | 24.9494  | -1.0072 | Down | 2.64E-16 | 1.02E-15 |
| Unigene3176   | Potri.007G008500.5 | 19.9926 | 40.1852  | -1.0072 | Down | 2.64E-16 | 1.02E-15 |
| Unigene39741  | Potri.005G035300.1 | 8.1007  | 16.2825  | -1.0072 | Down | 2.34E-11 | 7.18E-11 |
| Unigene48755  | Potri.007G003400.1 | 25.1201 | 50.4951  | -1.0073 | Down | 1.63E-18 | 6.86E-18 |
| Unigene23092  | Potri.001G143400.9 | 10.6264 | 21.3604  | -1.0073 | Down | 1.80E-12 | 5.85E-12 |
| Unigene29389  | Potri.016G120900.2 | 32.6928 | 65.7212  | -1.0074 | Down | 7.97E-34 | 5.36E-33 |
| Unigene50053  | Potri.001G090900.4 | 9.0402  | 18.1754  | -1.0076 | Down | 7.58E-11 | 2.27E-10 |
| Unigene108803 | Potri.019G049000.1 | 21.314  | 42.8642  | -1.008  | Down | 2.46E-10 | 7.15E-10 |
| Unigene29269  | Potri.017G032000.3 | 11.876  | 23.8837  | -1.008  | Down | 1.89E-11 | 5.83E-11 |
| Unigene4452   | Potri.014G138500.1 | 19.2514 | 38.7161  | -1.008  | Down | 3.34E-19 | 1.44E-18 |
| Unigene36228  | Potri.013G101700.2 | 26.1445 | 52.5788  | -1.008  | Down | 1.46E-12 | 4.76E-12 |
| Unigene45978  | Potri.010G142700.1 | 37.5079 | 75.4314  | -1.008  | Down | 5.19E-28 | 2.97E-27 |
| Unigene27387  | Potri.006G197200.1 | 2.8939  | 5.8199   | -1.008  | Down | 1.10E-04 | 2.10E-04 |
| Unigene2410   | Potri.006G069900.9 | 2.4432  | 4.9135   | -1.008  | Down | 1.10E-04 | 2.10E-04 |
| Unigene28869  | Potri.002G232800.1 | 3.4194  | 6.8766   | -1.008  | Down | 2.46E-10 | 7.15E-10 |
| Unigene79907  | Potri.002G224100.1 | 15.9855 | 32.1482  | -1.008  | Down | 3.23E-09 | 8.80E-09 |
| Unigene41970  | Potri.002G176700.1 | 3.3977  | 6.8331   | -1.008  | Down | 1.10E-04 | 2.10E-04 |
| Unigene8939   | Potri.002G052300.1 | 6.2067  | 12.4823  | -1.008  | Down | 3.23E-09 | 8.80E-09 |
| Unigene10953  | Potri.002G013900.1 | 8.2658  | 16.6232  | -1.008  | Down | 3.34E-19 | 1.44E-18 |
| Unigene2715   | Potri.008G143700.4 | 23.27   | 46.8018  | -1.0081 | Down | 6.67E-32 | 4.27E-31 |
| Unigene18874  | Potri.005G088800.1 | 7.2278  | 14.5381  | -1.0082 | Down | 1.36E-17 | 5.53E-17 |
| Unigene45020  | Potri.003G104300.2 | 6.2221  | 12.5155  | -1.0082 | Down | 2.22E-15 | 8.21E-15 |
| Unigene42888  | Potri.T065600.2    | 5.9883  | 12.046   | -1.0083 | Down | 2.31E-41 | 1.87E-40 |
| Unigene2632   | Potri.008G035600.2 | 5.8614  | 11.7906  | -1.0083 | Down | 4.72E-12 | 1.50E-11 |
| Unigene32018  | Potri.003G124700.1 | 16.0351 | 32.255   | -1.0083 | Down | 4.94E-49 | 4.72E-48 |
| Unigene3319   | Potri.015G146900.3 | 17.1149 | 34.4315  | -1.0085 | Down | 1.73E-31 | 1.09E-30 |
| Unigene64748  | Potri.008G088600.2 | 6.8735  | 13.8279  | -1.0085 | Down | 4.37E-17 | 1.74E-16 |
| Unigene7950   | Potri.006G023900.2 | 5.2519  | 10.5659  | -1.0085 | Down | 1.05E-08 | 2.79E-08 |
| Unigene28830  | Potri.002G092700.1 | 11.0267 | 22.1837  | -1.0085 | Down | 5.58E-16 | 2.12E-15 |
| Unigene47943  | Potri.001G235400.4 | 9.421   | 18.9533  | -1.0085 | Down | 1.05E-08 | 2.79E-08 |
| Unigene18722  | Potri.T055300.1    | 7.979   | 16.0534  | -1.0086 | Down | 1.40E-07 | 3.45E-07 |



|              |                    |         |          |         |      |          |          |
|--------------|--------------------|---------|----------|---------|------|----------|----------|
| Unigene51868 | Potri.018G034200.1 | 3.9817  | 8.0118   | -1.0087 | Down | 1.90E-06 | 4.27E-06 |
| Unigene27760 | Potri.003G051200.1 | 7.026   | 14.1372  | -1.0087 | Down | 1.90E-06 | 4.27E-06 |
| Unigene48989 | Potri.003G100800.2 | 4.1531  | 8.3578   | -1.0089 | Down | 2.62E-05 | 5.33E-05 |
| Unigene49317 | Potri.T110500.1    | 6.064   | 12.2035  | -1.009  | Down | 2.62E-05 | 5.33E-05 |
| Unigene87240 | Potri.002G027100.1 | 17.1602 | 34.5362  | -1.009  | Down | 3.82E-12 | 1.22E-11 |
| Unigene49728 | Potri.007G074800.1 | 31.0451 | 62.4831  | -1.0091 | Down | 1.11E-21 | 5.21E-21 |
| Unigene36970 | Potri.003G086100.1 | 44.2774 | 89.1182  | -1.0091 | Down | 2.82E-27 | 1.58E-26 |
| Unigene12811 | Potri.016G019800.3 | 16.5279 | 33.2671  | -1.0092 | Down | 2.22E-23 | 1.10E-22 |
| Unigene45249 | Potri.010G100200.1 | 22.7337 | 45.7583  | -1.0092 | Down | 1.95E-38 | 1.47E-37 |
| Unigene84350 | Potri.001G400100.4 | 22.4066 | 45.0999  | -1.0092 | Down | 7.42E-14 | 2.57E-13 |
| Unigene50067 | Potri.014G060900.3 | 5.0084  | 10.0818  | -1.0093 | Down | 3.75E-04 | 6.76E-04 |
| Unigene39688 | Potri.005G140200.2 | 4.0343  | 8.1209   | -1.0093 | Down | 6.47E-10 | 1.84E-09 |
| Unigene2679  | Potri.015G138400.1 | 14.2156 | 28.6167  | -1.0094 | Down | 1.13E-25 | 6.05E-25 |
| Unigene51041 | Potri.006G161600.1 | 50.7536 | 102.1718 | -1.0094 | Down | 9.70E-36 | 6.86E-35 |
| Unigene16571 | Potri.014G110200.1 | 16.8614 | 33.9464  | -1.0095 | Down | 8.52E-09 | 2.27E-08 |
| Unigene40422 | Potri.004G133800.1 | 25.2922 | 50.9196  | -1.0095 | Down | 3.66E-16 | 1.40E-15 |
| Unigene41536 | Potri.017G043200.5 | 19.0438 | 38.3457  | -1.0097 | Down | 3.09E-12 | 9.92E-12 |
| Unigene14195 | Potri.001G412800.1 | 8.8189  | 17.7563  | -1.0097 | Down | 6.31E-06 | 1.36E-05 |
| Unigene12192 | Potri.002G235400.1 | 6.5961  | 13.2823  | -1.0098 | Down | 1.13E-07 | 2.80E-07 |
| Unigene53724 | Potri.018G110100.1 | 19.0155 | 38.2941  | -1.0099 | Down | 4.01E-11 | 1.22E-10 |
| Unigene25148 | Potri.016G120900.2 | 21.6471 | 43.5938  | -1.0099 | Down | 4.01E-11 | 1.22E-10 |
| Unigene28393 | Potri.003G145900.2 | 9.6785  | 19.491   | -1.01   | Down | 4.01E-11 | 1.22E-10 |
| Unigene26934 | Potri.001G352600.1 | 21.1364 | 42.5666  | -1.01   | Down | 7.73E-13 | 2.56E-12 |
| Unigene41869 | Potri.014G136300.1 | 2.7674  | 5.5741   | -1.0102 | Down | 8.83E-05 | 1.70E-04 |
| Unigene18138 | Potri.013G087000.1 | 2.5494  | 5.1351   | -1.0102 | Down | 8.83E-05 | 1.70E-04 |
| Unigene26767 | Potri.010G186900.2 | 7.9068  | 15.9259  | -1.0102 | Down | 8.83E-05 | 1.70E-04 |
| Unigene18501 | Potri.004G200800.1 | 3.1803  | 6.4058   | -1.0102 | Down | 2.79E-08 | 7.18E-08 |
| Unigene44813 | Potri.012G015400.4 | 5.3262  | 10.7288  | -1.0103 | Down | 6.05E-26 | 3.26E-25 |
| Unigene28813 | Potri.015G096100.1 | 8.954   | 18.0377  | -1.0104 | Down | 4.86E-14 | 1.70E-13 |
| Unigene66054 | Potri.009G069700.1 | 4.5724  | 9.2112   | -1.0104 | Down | 2.50E-12 | 8.07E-12 |
| Unigene22760 | Potri.003G049100.1 | 33.6193 | 67.7255  | -1.0104 | Down | 1.54E-26 | 8.42E-26 |
| Unigene39695 | Potri.002G092600.1 | 8.6827  | 17.4911  | -1.0104 | Down | 4.86E-14 | 1.70E-13 |
| Unigene19678 | Potri.001G159600.1 | 14.6752 | 29.5625  | -1.0104 | Down | 9.54E-16 | 3.59E-15 |
| Unigene19955 | Potri.008G192500.1 | 69.2936 | 139.6089 | -1.0106 | Down | 2.10E-33 | 1.40E-32 |
| Unigene37582 | Potri.001G310900.1 | 21.5253 | 43.3717  | -1.0107 | Down | 3.24E-11 | 9.89E-11 |
| Unigene64824 | Potri.018G101200.2 | 3.3073  | 6.6645   | -1.0108 | Down | 2.11E-05 | 4.32E-05 |
| Unigene75938 | Potri.014G172300.4 | 9.0322  | 18.2005  | -1.0108 | Down | 2.11E-05 | 4.32E-05 |
| Unigene49016 | Potri.018G102400.2 | 35.6004 | 71.7406  | -1.0109 | Down | 4.33E-34 | 2.94E-33 |
| Unigene21520 | Potri.004G145700.1 | 11.5903 | 23.3562  | -1.0109 | Down | 4.33E-34 | 2.94E-33 |

|              |                    |         |          |         |      |          |          |
|--------------|--------------------|---------|----------|---------|------|----------|----------|
| Unigene50339 | Potri.004G105200.1 | 1.9517  | 3.9329   | -1.0109 | Down | 2.11E-05 | 4.32E-05 |
| Unigene7486  | Potri.014G048500.1 | 4.2902  | 8.6461   | -1.011  | Down | 9.15E-08 | 2.27E-07 |
| Unigene24071 | Potri.011G051800.5 | 7.5129  | 15.1409  | -1.011  | Down | 9.15E-08 | 2.27E-07 |
| Unigene27730 | Potri.002G111000.1 | 23.8037 | 47.9704  | -1.011  | Down | 3.85E-18 | 1.60E-17 |
| Unigene17867 | Potri.008G063400.1 | 22.846  | 46.0455  | -1.0111 | Down | 2.49E-23 | 1.24E-22 |
| Unigene32052 | Potri.016G077400.2 | 12.0285 | 24.2468  | -1.0113 | Down | 4.00E-41 | 3.23E-40 |
| Unigene12155 | Potri.016G076400.1 | 11.7191 | 23.6224  | -1.0113 | Down | 2.25E-08 | 5.83E-08 |
| Unigene11619 | Potri.004G013700.2 | 6.225   | 12.5477  | -1.0113 | Down | 1.05E-10 | 3.13E-10 |
| Unigene22210 | Potri.001G037200.1 | 13.6839 | 27.5827  | -1.0113 | Down | 2.49E-15 | 9.19E-15 |
| Unigene37696 | Potri.019G099500.1 | 37.2995 | 75.191   | -1.0114 | Down | 3.12E-18 | 1.30E-17 |
| Unigene26723 | Potri.015G090200.2 | 11.5207 | 23.2263  | -1.0115 | Down | 5.56E-09 | 1.50E-08 |
| Unigene12824 | Potri.014G121900.2 | 4.4795  | 9.0309   | -1.0115 | Down | 5.56E-09 | 1.50E-08 |
| Unigene39036 | Potri.008G024700.1 | 12.1569 | 24.508   | -1.0115 | Down | 3.98E-21 | 1.84E-20 |
| Unigene5940  | Potri.007G113300.1 | 17.8543 | 35.9953  | -1.0115 | Down | 5.56E-09 | 1.50E-08 |
| Unigene3140  | Potri.002G257100.2 | 15.5566 | 31.3641  | -1.0116 | Down | 3.19E-14 | 1.12E-13 |
| Unigene43258 | Potri.019G048300.1 | 22.1195 | 44.5983  | -1.0117 | Down | 1.50E-35 | 1.06E-34 |
| Unigene67533 | Potri.005G168600.2 | 7.9846  | 16.0987  | -1.0117 | Down | 1.23E-06 | 2.81E-06 |
| Unigene25302 | Potri.005G160300.1 | 51.734  | 104.3164 | -1.0118 | Down | 1.43E-31 | 9.05E-31 |
| Unigene3255  | Potri.007G087200.4 | 3.0243  | 6.0988   | -1.0119 | Down | 3.01E-07 | 7.21E-07 |
| Unigene3282  | Potri.001G161000.1 | 5.4158  | 10.9215  | -1.0119 | Down | 5.07E-16 | 1.93E-15 |
| Unigene5675  | Potri.006G280900.1 | 63.4013 | 127.862  | -1.012  | Down | 5.21E-61 | 6.31E-60 |
| Unigene43088 | Potri.006G133300.1 | 18.6758 | 37.6631  | -1.012  | Down | 3.48E-28 | 2.00E-27 |
| Unigene54889 | Potri.001G359300.6 | 3.8248  | 7.714    | -1.0121 | Down | 8.51E-11 | 2.54E-10 |
| Unigene1399  | Potri.001G253100.2 | 13.856  | 27.9457  | -1.0121 | Down | 3.22E-17 | 1.29E-16 |
| Unigene45768 | Potri.014G000500.5 | 15.2751 | 30.8087  | -1.0122 | Down | 7.38E-08 | 1.85E-07 |
| Unigene3307  | Potri.011G001000.2 | 6.4932  | 13.0971  | -1.0122 | Down | 6.49E-15 | 2.35E-14 |
| Unigene30239 | Potri.010G179000.2 | 13.5349 | 27.2988  | -1.0122 | Down | 7.38E-08 | 1.85E-07 |
| Unigene24491 | Potri.019G041100.1 | 39.7862 | 80.2674  | -1.0125 | Down | 3.78E-63 | 4.75E-62 |
| Unigene10908 | Potri.010G085500.1 | 27.8595 | 56.2026  | -1.0125 | Down | 3.04E-64 | 3.90E-63 |
| Unigene10071 | Potri.002G215900.1 | 15.7806 | 31.839   | -1.0126 | Down | 1.11E-09 | 3.12E-09 |
| Unigene94647 | Potri.002G078800.1 | 4.3189  | 8.7138   | -1.0126 | Down | 1.11E-09 | 3.12E-09 |
| Unigene26707 | Potri.013G118000.6 | 15.0152 | 30.2994  | -1.0129 | Down | 6.88E-11 | 2.07E-10 |
| Unigene7753  | Potri.012G062100.1 | 6.9981  | 14.1222  | -1.0129 | Down | 3.33E-16 | 1.28E-15 |
| Unigene58953 | Potri.010G209200.1 | 4.0655  | 8.2039   | -1.0129 | Down | 4.09E-06 | 8.93E-06 |
| Unigene53346 | Potri.008G106800.1 | 13.3137 | 26.866   | -1.0129 | Down | 6.88E-11 | 2.07E-10 |
| Unigene50565 | Potri.002G182000.2 | 9.108   | 18.3793  | -1.0129 | Down | 6.88E-11 | 2.07E-10 |
| Unigene13805 | Potri.001G383800.3 | 3.6319  | 7.329    | -1.0129 | Down | 4.09E-06 | 8.93E-06 |
| Unigene47430 | Potri.015G110000.1 | 10.0695 | 20.3218  | -1.013  | Down | 9.93E-07 | 2.29E-06 |
| Unigene52680 | Potri.009G049400.3 | 7.5665  | 15.2704  | -1.013  | Down | 9.93E-07 | 2.29E-06 |

|               |                    |          |          |         |      |          |          |
|---------------|--------------------|----------|----------|---------|------|----------|----------|
| Unigene2753   | Potri.004G085400.3 | 6.6606   | 13.4417  | -1.013  | Down | 8.38E-17 | 3.30E-16 |
| Unigene51254  | Potri.003G158100.1 | 32.2633  | 65.1102  | -1.013  | Down | 8.38E-17 | 3.30E-16 |
| Unigene38277  | Potri.001G037300.3 | 11.0115  | 22.223   | -1.013  | Down | 4.29E-12 | 1.37E-11 |
| Unigene12285  | Potri.001G245500.1 | 23.8364  | 48.1113  | -1.0132 | Down | 1.15E-25 | 6.16E-25 |
| Unigene17858  | Potri.008G014700.1 | 10.1242  | 20.437   | -1.0134 | Down | 1.47E-08 | 3.84E-08 |
| Unigene42469  | Potri.006G154400.1 | 9.2538   | 18.6805  | -1.0134 | Down | 2.26E-23 | 1.12E-22 |
| Unigene31948  | Potri.011G072500.1 | 4.9144   | 9.921    | -1.0135 | Down | 3.69E-25 | 1.94E-24 |
| Unigene35182  | Potri.001G077000.1 | 17.1795  | 34.6827  | -1.0135 | Down | 8.99E-10 | 2.53E-09 |
| Unigene13488  | Potri.014G195100.1 | 4.2457   | 8.5724   | -1.0137 | Down | 1.39E-11 | 4.31E-11 |
| Unigene7847   | Potri.008G159700.2 | 15.8274  | 31.9574  | -1.0137 | Down | 7.24E-23 | 3.53E-22 |
| Unigene45256  | Potri.001G104700.1 | 6.6733   | 13.4744  | -1.0137 | Down | 8.68E-13 | 2.86E-12 |
| Unigene30132  | Potri.014G039100.1 | 10.1901  | 20.5759  | -1.0138 | Down | 2.17E-13 | 7.38E-13 |
| Unigene15963  | Potri.014G078100.2 | 11.4722  | 23.1664  | -1.0139 | Down | 8.66E-16 | 3.26E-15 |
| Unigene42927  | Potri.010G068400.2 | 19.1039  | 38.5778  | -1.0139 | Down | 2.32E-45 | 2.05E-44 |
| Unigene82086  | Potri.015G031800.2 | 73.447   | 148.3284 | -1.014  | Down | 1.62E-39 | 1.25E-38 |
| Unigene18489  | Potri.005G241700.1 | 9.3575   | 18.8969  | -1.014  | Down | 1.39E-17 | 5.63E-17 |
| Unigene65904  | Potri.016G083100.3 | 7.8581   | 15.8709  | -1.0141 | Down | 1.65E-29 | 9.90E-29 |
| Unigene87574  | Potri.013G056800.1 | 114.2445 | 230.749  | -1.0142 | Down | 6.85E-74 | 1.02E-72 |
| Unigene17434  | Potri.004G063200.2 | 6.8573   | 13.8502  | -1.0142 | Down | 7.93E-38 | 5.90E-37 |
| Unigene8240   | Potri.014G087900.1 | 4.6503   | 9.3939   | -1.0144 | Down | 1.19E-08 | 3.12E-08 |
| Unigene50321  | Potri.013G002700.1 | 15.4797  | 31.2699  | -1.0144 | Down | 1.34E-29 | 8.06E-29 |
| Unigene25014  | Potri.011G068100.4 | 7.9928   | 16.1458  | -1.0144 | Down | 5.69E-05 | 1.12E-04 |
| Unigene27709  | Potri.010G129300.3 | 6.1737   | 12.4713  | -1.0144 | Down | 8.00E-07 | 1.86E-06 |
| Unigene101046 | Potri.008G185400.1 | 1.7265   | 3.4876   | -1.0144 | Down | 5.69E-05 | 1.12E-04 |
| Unigene36230  | Potri.007G147200.4 | 4.8758   | 9.8493   | -1.0144 | Down | 2.41E-04 | 4.42E-04 |
| Unigene36849  | Potri.007G042400.1 | 9.9053   | 20.0092  | -1.0144 | Down | 4.50E-11 | 1.36E-10 |
| Unigene37002  | Potri.006G250800.4 | 2.5315   | 5.1137   | -1.0144 | Down | 3.29E-06 | 7.27E-06 |
| Unigene29008  | Potri.005G258500.1 | 4.1272   | 8.3372   | -1.0144 | Down | 1.96E-07 | 4.75E-07 |
| Unigene27841  | Potri.005G231700.1 | 12.221   | 24.6872  | -1.0144 | Down | 7.02E-16 | 2.66E-15 |
| Unigene49111  | Potri.004G174600.2 | 7.1047   | 14.3519  | -1.0144 | Down | 1.19E-08 | 3.12E-08 |
| Unigene14113  | Potri.003G033700.8 | 17.3823  | 35.1133  | -1.0144 | Down | 2.81E-12 | 9.03E-12 |
| Unigene33879  | Potri.001G335800.1 | 5.5073   | 11.1251  | -1.0144 | Down | 4.81E-08 | 1.22E-07 |
| Unigene33656  | Potri.014G036400.1 | 25.3733  | 51.2663  | -1.0147 | Down | 8.85E-49 | 8.43E-48 |
| Unigene10792  | Potri.016G072700.2 | 12.3977  | 25.0513  | -1.0148 | Down | 5.80E-19 | 2.49E-18 |
| Unigene44491  | Potri.009G056500.2 | 18.4644  | 37.3091  | -1.0148 | Down | 3.71E-20 | 1.66E-19 |
| Unigene1022   | Potri.002G162000.1 | 6.4363   | 13.0052  | -1.0148 | Down | 3.71E-20 | 1.66E-19 |
| Unigene1376   | Potri.001G189100.2 | 17.4209  | 35.201   | -1.0148 | Down | 1.47E-19 | 6.42E-19 |
| Unigene39091  | Potri.010G086400.1 | 21.8809  | 44.2159  | -1.0149 | Down | 5.68E-16 | 2.16E-15 |
| Unigene1096   | Potri.002G173200.1 | 8.5392   | 17.2556  | -1.0149 | Down | 5.71E-31 | 3.56E-30 |

|               |                    |         |          |         |      |           |           |
|---------------|--------------------|---------|----------|---------|------|-----------|-----------|
| Unigene19067  | Potri.016G080700.2 | 10.3897 | 20.9964  | -1.015  | Down | 1.42E-13  | 4.88E-13  |
| Unigene9161   | Potri.014G137100.2 | 11.8346 | 23.9177  | -1.0151 | Down | 2.27E-12  | 7.33E-12  |
| Unigene15991  | Potri.006G116800.2 | 176.123 | 355.9451 | -1.0151 | Down | 1.61E-107 | 3.76E-106 |
| Unigene13271  | Potri.006G054200.1 | 4.4698  | 9.0334   | -1.0151 | Down | 2.27E-12  | 7.33E-12  |
| Unigene7781   | Potri.005G086100.1 | 7.9388  | 16.0469  | -1.0153 | Down | 4.13E-25  | 2.17E-24  |
| Unigene8439   | Potri.002G085400.1 | 9.0659  | 18.3252  | -1.0153 | Down | 2.37E-09  | 6.51E-09  |
| Unigene8286   | Potri.002G241800.1 | 5.6007  | 11.3215  | -1.0154 | Down | 9.57E-09  | 2.54E-08  |
| Unigene50502  | Potri.008G181400.3 | 14.7204 | 29.7598  | -1.0155 | Down | 2.43E-20  | 1.10E-19  |
| Unigene93944  | Potri.008G048400.1 | 18.8393 | 38.0855  | -1.0155 | Down | 1.39E-27  | 7.88E-27  |
| Unigene32486  | Potri.018G023000.1 | 24.9726 | 50.4891  | -1.0156 | Down | 1.11E-36  | 8.03E-36  |
| Unigene64422  | Potri.010G092100.1 | 6.2682  | 12.6725  | -1.0156 | Down | 1.15E-13  | 3.96E-13  |
| Unigene52436  | Potri.015G084200.1 | 8.2014  | 16.5824  | -1.0157 | Down | 6.45E-07  | 1.50E-06  |
| Unigene19903  | Potri.008G226200.2 | 10.2363 | 20.6969  | -1.0157 | Down | 6.45E-07  | 1.50E-06  |
| Unigene43358  | Potri.011G132700.1 | 7.9417  | 16.0587  | -1.0158 | Down | 1.75E-26  | 9.58E-26  |
| Unigene80141  | Potri.008G221400.2 | 40.6353 | 82.1673  | -1.0158 | Down | 1.26E-21  | 5.93E-21  |
| Unigene53504  | Potri.008G144200.1 | 25.3563 | 51.2708  | -1.0158 | Down | 7.35E-12  | 2.32E-11  |
| Unigene34711  | Potri.006G134300.1 | 15.8624 | 32.0739  | -1.0158 | Down | 3.20E-22  | 1.53E-21  |
| Unigene66022  | Potri.006G021300.1 | 3.8979  | 7.882    | -1.0159 | Down | 2.65E-06  | 5.89E-06  |
| Unigene8314   | Potri.002G108600.9 | 21.0751 | 42.6179  | -1.0159 | Down | 1.97E-20  | 8.91E-20  |
| Unigene29540  | Potri.001G292800.1 | 9.4706  | 19.1508  | -1.0159 | Down | 2.94E-11  | 9.00E-11  |
| Unigene33020  | Potri.001G261600.1 | 3.4244  | 6.9246   | -1.0159 | Down | 2.65E-06  | 5.89E-06  |
| Unigene108877 | Potri.002G110800.1 | 10.1242 | 20.4753  | -1.0161 | Down | 1.10E-05  | 2.31E-05  |
| Unigene10056  | Potri.007G050100.1 | 12.6723 | 25.6309  | -1.0162 | Down | 1.91E-09  | 5.29E-09  |
| Unigene39475  | Potri.018G123300.1 | 9.9508  | 20.1272  | -1.0163 | Down | 8.68E-25  | 4.51E-24  |
| Unigene29672  | Potri.006G040000.2 | 28.5232 | 57.6951  | -1.0163 | Down | 7.42E-28  | 4.24E-27  |
| Unigene20318  | Potri.017G016100.1 | 13.3733 | 27.0515  | -1.0164 | Down | 1.49E-12  | 4.85E-12  |
| Unigene13927  | Potri.002G140200.1 | 16.845  | 34.0741  | -1.0164 | Down | 1.35E-23  | 6.75E-23  |
| Unigene79947  | Potri.002G049800.2 | 7.4599  | 15.09    | -1.0164 | Down | 4.57E-05  | 9.09E-05  |
| Unigene43234  | Potri.002G088100.1 | 5.2289  | 10.5783  | -1.0165 | Down | 3.13E-08  | 8.04E-08  |
| Unigene14695  | Potri.018G023700.1 | 47.3704 | 95.8417  | -1.0167 | Down | 1.30E-20  | 5.89E-20  |
| Unigene17712  | Potri.009G005300.1 | 7.2478  | 14.6647  | -1.0167 | Down | 1.27E-07  | 3.14E-07  |
| Unigene30591  | Potri.006G243200.1 | 6.1665  | 12.4769  | -1.0167 | Down | 1.93E-04  | 3.59E-04  |
| Unigene63378  | Potri.003G164100.1 | 5.6018  | 11.3343  | -1.0167 | Down | 1.93E-04  | 3.59E-04  |
| Unigene18854  | Potri.001G163200.1 | 2.7067  | 5.4766   | -1.0167 | Down | 1.93E-04  | 3.59E-04  |
| Unigene43932  | Potri.010G028600.3 | 21.8626 | 44.2375  | -1.0168 | Down | 1.70E-22  | 8.23E-22  |
| Unigene20426  | Potri.006G110400.3 | 8.754   | 17.7143  | -1.0169 | Down | 3.84E-10  | 1.10E-09  |
| Unigene53681  | Potri.013G033800.1 | 11.4056 | 23.0816  | -1.017  | Down | 5.20E-07  | 1.23E-06  |
| Unigene49370  | Potri.008G207000.2 | 17.0908 | 34.5866  | -1.017  | Down | 1.20E-12  | 3.94E-12  |
| Unigene16966  | Potri.001G104700.1 | 7.4198  | 15.0154  | -1.017  | Down | 5.20E-07  | 1.23E-06  |

|               |                    |         |          |         |      |          |          |
|---------------|--------------------|---------|----------|---------|------|----------|----------|
| Unigene9746   | Potri.017G119100.1 | 36.1049 | 73.077   | -1.0172 | Down | 5.45E-22 | 2.59E-21 |
| Unigene23692  | Potri.013G091400.1 | 3.7642  | 7.6192   | -1.0173 | Down | 6.24E-09 | 1.67E-08 |
| Unigene11286  | Potri.006G026100.2 | 3.8805  | 7.8546   | -1.0173 | Down | 6.11E-14 | 2.13E-13 |
| Unigene82960  | Potri.014G045200.1 | 31.3879 | 63.5381  | -1.0174 | Down | 2.57E-18 | 1.08E-17 |
| Unigene33258  | Potri.005G131200.1 | 17.0138 | 34.4445  | -1.0176 | Down | 3.12E-15 | 1.15E-14 |
| Unigene2818   | Potri.001G377200.1 | 33.2782 | 67.373   | -1.0176 | Down | 2.17E-44 | 1.87E-43 |
| Unigene47628  | Potri.014G094900.3 | 9.3653  | 18.9619  | -1.0177 | Down | 8.82E-06 | 1.87E-05 |
| Unigene54220  | Potri.010G172400.1 | 2.4172  | 4.8941   | -1.0177 | Down | 8.82E-06 | 1.87E-05 |
| Unigene10436  | Potri.008G083700.1 | 24.8664 | 50.347   | -1.0177 | Down | 2.30E-23 | 1.14E-22 |
| Unigene35831  | Potri.005G158400.1 | 10.1092 | 20.4682  | -1.0177 | Down | 8.82E-06 | 1.87E-05 |
| Unigene18140  | Potri.005G085100.5 | 7.1398  | 14.4561  | -1.0177 | Down | 3.10E-10 | 8.97E-10 |
| Unigene28354  | Potri.004G217400.1 | 17.5897 | 35.6168  | -1.0178 | Down | 2.08E-18 | 8.75E-18 |
| Unigene41730  | Potri.010G176400.1 | 24.806  | 50.2315  | -1.0179 | Down | 3.58E-22 | 1.71E-21 |
| Unigene5506   | Potri.001G457800.2 | 19.0802 | 38.6396  | -1.018  | Down | 1.56E-11 | 4.82E-11 |
| Unigene8501   | Potri.015G138600.1 | 19.9166 | 40.3368  | -1.0181 | Down | 7.35E-23 | 3.59E-22 |
| Unigene45151  | Potri.019G033800.2 | 4.2579  | 8.6242   | -1.0182 | Down | 3.67E-05 | 7.36E-05 |
| Unigene56063  | Potri.017G115200.1 | 5.0179  | 10.1634  | -1.0182 | Down | 7.87E-13 | 2.60E-12 |
| Unigene4114   | Potri.015G072100.3 | 7.97    | 16.1428  | -1.0182 | Down | 4.19E-07 | 9.95E-07 |
| Unigene24099  | Potri.015G029300.1 | 11.1759 | 22.6362  | -1.0182 | Down | 1.20E-31 | 7.61E-31 |
| Unigene6773   | Potri.009G119200.2 | 4.4055  | 8.923    | -1.0182 | Down | 4.19E-07 | 9.95E-07 |
| Unigene75393  | Potri.008G119100.1 | 29.6701 | 60.0951  | -1.0182 | Down | 1.01E-14 | 3.63E-14 |
| Unigene1398   | Potri.006G011700.3 | 2.129   | 4.3121   | -1.0182 | Down | 3.67E-05 | 7.36E-05 |
| Unigene47013  | Potri.005G232100.1 | 8.4772  | 17.17    | -1.0182 | Down | 3.67E-05 | 7.36E-05 |
| Unigene35230  | Potri.004G194400.2 | 6.2374  | 12.6335  | -1.0182 | Down | 3.67E-05 | 7.36E-05 |
| Unigene18895  | Potri.003G137700.1 | 2.5237  | 5.1115   | -1.0182 | Down | 3.67E-05 | 7.36E-05 |
| Unigene46676  | Potri.002G108600.9 | 13.5143 | 27.3725  | -1.0182 | Down | 4.19E-07 | 9.95E-07 |
| Unigene21253  | Potri.001G174100.1 | 7.7996  | 15.7977  | -1.0182 | Down | 3.12E-52 | 3.19E-51 |
| Unigene32709  | Potri.001G206400.1 | 16.2877 | 32.9945  | -1.0184 | Down | 4.03E-46 | 3.62E-45 |
| Unigene11608  | Potri.008G047300.2 | 27.3709 | 55.4498  | -1.0185 | Down | 6.47E-40 | 5.06E-39 |
| Unigene17828  | Potri.008G189800.1 | 7.5253  | 15.2457  | -1.0186 | Down | 2.04E-08 | 5.31E-08 |
| Unigene89088  | Potri.006G084200.1 | 49.4461 | 100.1735 | -1.0186 | Down | 3.59E-36 | 2.56E-35 |
| Unigene2396   | Potri.007G060300.1 | 5.8913  | 11.9362  | -1.0187 | Down | 8.47E-27 | 4.68E-26 |
| Unigene53918  | Potri.005G147400.3 | 33.4324 | 67.7369  | -1.0187 | Down | 7.06E-42 | 5.78E-41 |
| Unigene51666  | Potri.008G077300.2 | 1.545   | 3.1308   | -1.0189 | Down | 1.55E-04 | 2.90E-04 |
| Unigene116583 | Potri.001G285800.1 | 17.3834 | 35.2241  | -1.0189 | Down | 6.37E-13 | 2.11E-12 |
| Unigene21511  | Potri.011G132800.1 | 9.1882  | 18.6195  | -1.019  | Down | 3.35E-33 | 2.22E-32 |
| Unigene52642  | Potri.011G062500.2 | 15.2095 | 30.8217  | -1.019  | Down | 5.05E-11 | 1.53E-10 |
| Unigene38921  | Potri.010G183200.2 | 4.5941  | 9.3098   | -1.019  | Down | 1.55E-04 | 2.90E-04 |
| Unigene8690   | Potri.010G163000.3 | 16.206  | 32.841   | -1.019  | Down | 5.05E-11 | 1.53E-10 |

|               |                    |         |          |         |      |          |          |
|---------------|--------------------|---------|----------|---------|------|----------|----------|
| Unigene52474  | Potri.010G054600.1 | 4.2803  | 8.6739   | -1.019  | Down | 1.55E-04 | 2.90E-04 |
| Unigene36617  | Potri.007G074800.1 | 8.3275  | 16.8761  | -1.019  | Down | 5.18E-25 | 2.71E-24 |
| Unigene8184   | Potri.T157400.1    | 24.6226 | 49.9032  | -1.0191 | Down | 5.18E-32 | 3.32E-31 |
| Unigene40296  | Potri.010G112200.9 | 55.425  | 112.3249 | -1.0191 | Down | 1.88E-29 | 1.12E-28 |
| Unigene17191  | Potri.009G150300.3 | 10.4334 | 21.1464  | -1.0192 | Down | 1.29E-13 | 4.43E-13 |
| Unigene17538  | Potri.007G023200.1 | 17.604  | 35.6785  | -1.0192 | Down | 8.52E-17 | 3.35E-16 |
| Unigene46097  | Potri.004G131900.3 | 23.6934 | 48.0201  | -1.0192 | Down | 8.52E-17 | 3.35E-16 |
| Unigene47970  | Potri.002G059800.1 | 67.9641 | 137.7502 | -1.0192 | Down | 1.46E-58 | 1.69E-57 |
| Unigene13644  | Potri.008G193900.1 | 23.2578 | 47.1433  | -1.0193 | Down | 8.21E-50 | 7.98E-49 |
| Unigene44443  | Potri.013G114300.1 | 8.7487  | 17.7362  | -1.0196 | Down | 1.34E-15 | 5.02E-15 |
| Unigene24024  | Potri.005G211600.2 | 4.5087  | 9.141    | -1.0196 | Down | 8.15E-10 | 2.30E-09 |
| Unigene8749   | Potri.004G155500.1 | 15.7675 | 31.9655  | -1.0196 | Down | 1.65E-08 | 4.30E-08 |
| Unigene97     | Potri.013G068400.5 | 6.8121  | 13.8137  | -1.0199 | Down | 2.80E-55 | 3.04E-54 |
| Unigene87972  | Potri.018G093800.1 | 11.7063 | 23.7402  | -1.02   | Down | 3.29E-09 | 8.96E-09 |
| Unigene7892   | Potri.013G144300.2 | 3.5623  | 7.2243   | -1.02   | Down | 6.69E-08 | 1.68E-07 |
| Unigene48252  | Potri.006G115000.1 | 14.649  | 29.7079  | -1.02   | Down | 1.64E-10 | 4.81E-10 |
| Unigene4399   | Potri.003G063300.2 | 5.7645  | 11.6902  | -1.02   | Down | 2.95E-05 | 5.96E-05 |
| Unigene5645   | Potri.001G058700.1 | 26.7242 | 54.1961  | -1.02   | Down | 1.09E-15 | 4.08E-15 |
| Unigene38381  | Potri.004G039900.2 | 17.283  | 35.0552  | -1.0203 | Down | 2.22E-16 | 8.57E-16 |
| Unigene45670  | Potri.019G023400.1 | 6.8597  | 13.9147  | -1.0204 | Down | 6.25E-21 | 2.87E-20 |
| Unigene52970  | Potri.008G161200.2 | 9.0795  | 18.4182  | -1.0204 | Down | 6.59E-10 | 1.87E-09 |
| Unigene24252  | Potri.007G099700.2 | 8.8421  | 17.9355  | -1.0204 | Down | 1.97E-34 | 1.34E-33 |
| Unigene54111  | Potri.002G217500.2 | 5.3947  | 10.9431  | -1.0204 | Down | 3.30E-11 | 1.01E-10 |
| Unigene39015  | Potri.008G082100.1 | 34.0726 | 69.1226  | -1.0205 | Down | 1.02E-28 | 5.98E-28 |
| Unigene49198  | Potri.006G247000.1 | 10.4026 | 21.1023  | -1.0205 | Down | 6.59E-10 | 1.87E-09 |
| Unigene48850  | Potri.006G166300.1 | 8.3084  | 16.8549  | -1.0205 | Down | 1.33E-08 | 3.49E-08 |
| Unigene39532  | Potri.005G206800.3 | 12.3929 | 25.1402  | -1.0205 | Down | 1.47E-32 | 9.60E-32 |
| Unigene17913  | Potri.012G061400.1 | 9.3858  | 19.042   | -1.0206 | Down | 2.73E-07 | 6.56E-07 |
| Unigene73036  | Potri.009G163400.2 | 13.7419 | 27.8797  | -1.0206 | Down | 2.73E-07 | 6.56E-07 |
| Unigene24855  | Potri.009G032000.4 | 7.1267  | 14.4587  | -1.0206 | Down | 2.73E-07 | 6.56E-07 |
| Unigene15773  | Potri.006G147000.1 | 11.3073 | 22.9404  | -1.0206 | Down | 2.73E-07 | 6.56E-07 |
| Unigene7963   | Potri.017G100100.2 | 6.2318  | 12.6436  | -1.0207 | Down | 6.66E-12 | 2.10E-11 |
| Unigene23318  | Potri.016G031600.1 | 4.3456  | 8.8173   | -1.0208 | Down | 1.32E-10 | 3.91E-10 |
| Unigene110172 | Potri.005G204400.1 | 10.1266 | 20.5472  | -1.0208 | Down | 5.71E-06 | 1.23E-05 |
| Unigene42567  | Potri.018G021700.1 | 5.5063  | 11.1738  | -1.021  | Down | 1.35E-12 | 4.40E-12 |
| Unigene45208  | Potri.014G174800.1 | 7.353   | 14.9218  | -1.021  | Down | 2.13E-22 | 1.03E-21 |
| Unigene13410  | Potri.010G097900.1 | 8.5559  | 17.3622  | -1.021  | Down | 1.87E-53 | 1.97E-52 |
| Unigene20984  | Potri.002G243700.1 | 38.938  | 79.0205  | -1.021  | Down | 3.81E-32 | 2.46E-31 |
| Unigene8203   | Potri.015G113400.1 | 3.2934  | 6.6838   | -1.0211 | Down | 1.24E-04 | 2.35E-04 |

|               |                    |         |          |         |      |          |          |
|---------------|--------------------|---------|----------|---------|------|----------|----------|
| Unigene44596  | Potri.012G068900.3 | 20.4316 | 41.465   | -1.0211 | Down | 1.28E-27 | 7.27E-27 |
| Unigene11269  | Potri.010G111000.2 | 3.4418  | 6.985    | -1.0211 | Down | 1.24E-04 | 2.35E-04 |
| Unigene53443  | Potri.004G218600.1 | 5.608   | 11.3811  | -1.0211 | Down | 1.24E-04 | 2.35E-04 |
| Unigene51491  | Potri.006G225700.1 | 26.3992 | 53.5803  | -1.0212 | Down | 2.73E-13 | 9.23E-13 |
| Unigene31964  | Potri.005G234800.1 | 16.1603 | 32.798   | -1.0212 | Down | 1.62E-44 | 1.40E-43 |
| Unigene83970  | Potri.001G271700.3 | 32.8073 | 66.5842  | -1.0212 | Down | 7.92E-20 | 3.51E-19 |
| Unigene461    | Potri.017G036200.1 | 3.6403  | 7.3891   | -1.0213 | Down | 2.97E-17 | 1.19E-16 |
| Unigene90335  | Potri.015G138800.2 | 17.8132 | 36.1561  | -1.0213 | Down | 2.83E-15 | 1.04E-14 |
| Unigene74484  | Potri.013G082100.1 | 38.681  | 78.51    | -1.0213 | Down | 1.53E-18 | 6.45E-18 |
| Unigene40585  | Potri.004G081800.5 | 26.461  | 53.7145  | -1.0214 | Down | 2.14E-28 | 1.24E-27 |
| Unigene2890   | Potri.002G170100.4 | 41.9669 | 85.1858  | -1.0214 | Down | 1.23E-81 | 2.06E-80 |
| Unigene31436  | Potri.010G068400.2 | 12.0526 | 24.4665  | -1.0215 | Down | 1.07E-08 | 2.84E-08 |
| Unigene18341  | Potri.006G101500.6 | 8.0738  | 16.3904  | -1.0215 | Down | 6.42E-20 | 2.85E-19 |
| Unigene34386  | Potri.006G077100.1 | 6.3772  | 12.9472  | -1.0216 | Down | 1.24E-18 | 5.25E-18 |
| Unigene45268  | Potri.014G142700.1 | 4.8328  | 9.8127   | -1.0218 | Down | 2.20E-07 | 5.31E-07 |
| Unigene29673  | Potri.011G065700.7 | 7.6967  | 15.6276  | -1.0218 | Down | 2.37E-05 | 4.84E-05 |
| Unigene53510  | Potri.010G093200.2 | 14.2616 | 28.957   | -1.0218 | Down | 2.20E-07 | 5.31E-07 |
| Unigene21202  | Potri.015G085300.3 | 8.3986  | 17.0543  | -1.0219 | Down | 1.65E-32 | 1.07E-31 |
| Unigene20852  | Potri.010G192000.3 | 16.1557 | 32.8059  | -1.0219 | Down | 4.91E-18 | 2.03E-17 |
| Unigene16406  | Potri.001G246900.1 | 26.2792 | 53.3628  | -1.0219 | Down | 4.91E-18 | 2.03E-17 |
| Unigene17032  | Potri.015G122500.1 | 9.4081  | 19.1059  | -1.022  | Down | 4.30E-10 | 1.23E-09 |
| Unigene9503   | Potri.014G004900.3 | 20.4109 | 41.4501  | -1.022  | Down | 1.00E-18 | 4.27E-18 |
| Unigene48371  | Potri.006G165600.3 | 55.2767 | 112.2551 | -1.022  | Down | 7.63E-36 | 5.41E-35 |
| Unigene33673  | Potri.004G102000.1 | 24.6301 | 50.0167  | -1.022  | Down | 1.14E-22 | 5.52E-22 |
| Unigene13170  | Potri.003G074900.1 | 28.0723 | 57.0087  | -1.022  | Down | 2.01E-61 | 2.45E-60 |
| Unigene34122  | Potri.015G089100.1 | 16.8242 | 34.169   | -1.0222 | Down | 2.06E-19 | 8.96E-19 |
| Unigene3215   | Potri.012G135000.2 | 21.8583 | 44.3982  | -1.0223 | Down | 1.18E-34 | 8.07E-34 |
| Unigene54755  | Potri.010G101400.1 | 6.2166  | 12.6265  | -1.0223 | Down | 4.60E-06 | 1.00E-05 |
| Unigene29217  | Potri.008G067100.2 | 3.0872  | 6.2704   | -1.0223 | Down | 4.60E-06 | 1.00E-05 |
| Unigene40253  | Potri.002G217000.1 | 16.1016 | 32.7052  | -1.0223 | Down | 3.98E-18 | 1.65E-17 |
| Unigene297    | Potri.013G002600.1 | 4.6447  | 9.4351   | -1.0225 | Down | 1.74E-11 | 5.39E-11 |
| Unigene40451  | Potri.010G242600.2 | 71.0024 | 144.2362 | -1.0225 | Down | 5.27E-42 | 4.33E-41 |
| Unigene112015 | Potri.019G052400.1 | 27.4261 | 55.719   | -1.0226 | Down | 7.38E-15 | 2.67E-14 |
| Unigene35834  | Potri.014G114200.1 | 11.9769 | 24.3323  | -1.0226 | Down | 8.99E-07 | 2.08E-06 |
| Unigene48023  | Potri.010G021400.3 | 2.9011  | 5.8938   | -1.0226 | Down | 5.29E-04 | 9.35E-04 |
| Unigene6757   | Potri.006G095400.2 | 69.2706 | 140.7302 | -1.0226 | Down | 1.76E-70 | 2.49E-69 |
| Unigene9752   | Potri.002G055600.3 | 3.9322  | 7.9886   | -1.0226 | Down | 5.29E-04 | 9.35E-04 |
| Unigene12508  | Potri.011G170000.3 | 32.8903 | 66.8256  | -1.0227 | Down | 1.83E-43 | 1.55E-42 |
| Unigene11170  | Potri.010G019000.2 | 17.3991 | 35.3503  | -1.0227 | Down | 1.74E-37 | 1.28E-36 |

|               |                    |         |          |         |      |          |          |
|---------------|--------------------|---------|----------|---------|------|----------|----------|
| Unigene110747 | Potri.008G035600.4 | 30.3678 | 61.7003  | -1.0227 | Down | 1.50E-15 | 5.61E-15 |
| Unigene23244  | Potri.005G213300.3 | 18.1929 | 36.9632  | -1.0227 | Down | 3.22E-18 | 1.34E-17 |
| Unigene32764  | Potri.005G212800.2 | 35.1086 | 71.3316  | -1.0227 | Down | 2.13E-51 | 2.15E-50 |
| Unigene51276  | Potri.004G210200.5 | 8.3239  | 16.9141  | -1.0229 | Down | 1.77E-07 | 4.31E-07 |
| Unigene88232  | Potri.004G003000.2 | 83.6689 | 170.0237 | -1.023  | Down | 1.51E-57 | 1.71E-56 |
| Unigene66578  | Potri.008G043100.1 | 6.6715  | 13.5584  | -1.0231 | Down | 9.95E-05 | 1.91E-04 |
| Unigene7343   | Potri.006G106000.1 | 3.0336  | 6.1652   | -1.0231 | Down | 9.95E-05 | 1.91E-04 |
| Unigene107225 | Potri.002G110900.3 | 1.8035  | 3.6652   | -1.0231 | Down | 9.95E-05 | 1.91E-04 |
| Unigene34751  | Potri.007G020400.1 | 14.4511 | 29.371   | -1.0232 | Down | 1.02E-29 | 6.12E-29 |
| Unigene13582  | Potri.005G114600.2 | 8.7126  | 17.7079  | -1.0232 | Down | 1.02E-29 | 6.12E-29 |
| Unigene50015  | Potri.008G085600.2 | 20.8635 | 42.4068  | -1.0233 | Down | 9.42E-28 | 5.36E-27 |
| Unigene4181   | Potri.003G170200.1 | 22.9179 | 46.5829  | -1.0233 | Down | 2.24E-20 | 1.01E-19 |
| Unigene97475  | Potri.010G157900.2 | 1.6271  | 3.3074   | -1.0234 | Down | 1.91E-05 | 3.92E-05 |
| Unigene39351  | Potri.008G135100.3 | 10.4229 | 21.1873  | -1.0234 | Down | 1.17E-13 | 4.02E-13 |
| Unigene1263   | Potri.004G016900.1 | 60.8196 | 123.6271 | -1.0234 | Down | 1.51E-98 | 3.17E-97 |
| Unigene42570  | Potri.016G010200.1 | 18.0424 | 36.6825  | -1.0237 | Down | 5.39E-40 | 4.23E-39 |
| Unigene37058  | Potri.012G120300.1 | 15.4687 | 31.4493  | -1.0237 | Down | 5.65E-11 | 1.70E-10 |
| Unigene32589  | Potri.008G179800.1 | 15.009  | 30.5151  | -1.0237 | Down | 5.39E-40 | 4.23E-39 |
| Unigene38534  | Potri.006G185400.6 | 29.1292 | 59.2253  | -1.0237 | Down | 1.46E-26 | 8.02E-26 |
| Unigene29071  | Potri.005G109700.1 | 32.5408 | 66.1615  | -1.0237 | Down | 3.92E-56 | 4.34E-55 |
| Unigene11957  | Potri.001G216400.1 | 8.3411  | 16.9589  | -1.0237 | Down | 2.01E-16 | 7.79E-16 |
| Unigene85330  | Potri.016G051400.1 | 98.9474 | 201.2051 | -1.0239 | Down | 1.22E-59 | 1.44E-58 |
| Unigene4011   | Potri.010G217900.2 | 12.1299 | 24.6665  | -1.024  | Down | 1.43E-07 | 3.51E-07 |
| Unigene2937   | Potri.017G093600.1 | 30.7376 | 62.5103  | -1.0241 | Down | 5.61E-49 | 5.36E-48 |
| Unigene11630  | Potri.010G094400.1 | 19.3752 | 39.4036  | -1.0241 | Down | 2.41E-50 | 2.37E-49 |
| Unigene46288  | Potri.003G161600.1 | 25.9294 | 52.7337  | -1.0241 | Down | 7.98E-16 | 3.01E-15 |
| Unigene81795  | Potri.010G253100.3 | 50.5068 | 102.7303 | -1.0243 | Down | 4.07E-28 | 2.34E-27 |
| Unigene1821   | Potri.009G169700.1 | 36.683  | 74.6139  | -1.0243 | Down | 8.39E-29 | 4.93E-28 |
| Unigene5927   | Potri.001G123600.1 | 10.7631 | 21.8919  | -1.0243 | Down | 2.27E-10 | 6.61E-10 |
| Unigene26974  | Potri.001G374100.1 | 45.6451 | 92.848   | -1.0244 | Down | 5.02E-22 | 2.38E-21 |
| Unigene45709  | Potri.001G015400.2 | 34.7646 | 70.7143  | -1.0244 | Down | 7.35E-31 | 4.57E-30 |
| Unigene7638   | Potri.005G135900.1 | 17.3281 | 35.2491  | -1.0245 | Down | 4.35E-24 | 2.21E-23 |
| Unigene53517  | Potri.004G195300.2 | 29.1516 | 59.3024  | -1.0245 | Down | 7.67E-14 | 2.66E-13 |
| Unigene28392  | Potri.010G177200.3 | 30.4897 | 62.0286  | -1.0246 | Down | 1.23E-31 | 7.82E-31 |
| Unigene7418   | Potri.018G053800.5 | 11.7976 | 24.0084  | -1.025  | Down | 4.57E-09 | 1.23E-08 |
| Unigene1610   | Potri.010G114800.4 | 2.062   | 4.1962   | -1.025  | Down | 7.99E-05 | 1.54E-04 |
| Unigene22709  | Potri.009G045200.1 | 2.7182  | 5.5316   | -1.025  | Down | 1.53E-05 | 3.18E-05 |
| Unigene68654  | Potri.009G029100.3 | 2.1485  | 4.3722   | -1.025  | Down | 4.23E-04 | 7.55E-04 |
| Unigene17319  | Potri.006G092700.2 | 5.0644  | 10.3061  | -1.025  | Down | 2.98E-06 | 6.60E-06 |



|               |                    |         |          |         |      |          |          |
|---------------|--------------------|---------|----------|---------|------|----------|----------|
| Unigene25383  | Potri.005G255600.1 | 15.4937 | 31.5299  | -1.025  | Down | 7.46E-12 | 2.35E-11 |
| Unigene20006  | Potri.005G180500.2 | 21.7984 | 44.3603  | -1.025  | Down | 2.57E-15 | 9.48E-15 |
| Unigene80838  | Potri.004G123300.1 | 16.0492 | 32.6605  | -1.025  | Down | 9.14E-10 | 2.57E-09 |
| Unigene49652  | Potri.004G002700.1 | 14.7174 | 29.9501  | -1.025  | Down | 5.23E-16 | 1.99E-15 |
| Unigene19013  | Potri.003G001400.1 | 4.6733  | 9.5102   | -1.025  | Down | 1.53E-05 | 3.18E-05 |
| Unigene33616  | Potri.002G029000.1 | 4.3723  | 8.8977   | -1.025  | Down | 1.15E-07 | 2.84E-07 |
| Unigene30576  | Potri.001G412900.5 | 10.0208 | 20.3925  | -1.025  | Down | 2.29E-08 | 5.92E-08 |
| Unigene33996  | Potri.001G200200.3 | 5.8521  | 11.9091  | -1.025  | Down | 4.57E-09 | 1.23E-08 |
| Unigene100184 | Potri.018G101200.2 | 4.0855  | 8.3142   | -1.0251 | Down | 1.53E-05 | 3.18E-05 |
| Unigene31283  | Potri.010G152100.2 | 3.7403  | 7.6117   | -1.0251 | Down | 4.23E-04 | 7.55E-04 |
| Unigene55144  | Potri.008G012200.2 | 4.1316  | 8.408    | -1.0251 | Down | 4.23E-04 | 7.55E-04 |
| Unigene39815  | Potri.004G055300.1 | 3.3019  | 6.7195   | -1.0251 | Down | 1.53E-05 | 3.18E-05 |
| Unigene97425  | Potri.003G038800.1 | 2.666   | 5.4254   | -1.0251 | Down | 9.14E-10 | 2.57E-09 |
| Unigene97950  | Potri.001G117100.1 | 2.0198  | 4.1104   | -1.0251 | Down | 7.99E-05 | 1.54E-04 |
| Unigene1827   | Potri.001G149900.1 | 25.1868 | 51.2672  | -1.0254 | Down | 1.30E-21 | 6.11E-21 |
| Unigene28036  | Potri.012G069100.1 | 12.6102 | 25.6699  | -1.0255 | Down | 4.23E-16 | 1.62E-15 |
| Unigene30420  | Potri.002G020900.3 | 29.0295 | 59.0959  | -1.0255 | Down | 1.02E-14 | 3.68E-14 |
| Unigene32665  | Potri.001G148500.1 | 6.6392  | 13.5149  | -1.0255 | Down | 8.64E-17 | 3.40E-16 |
| Unigene74091  | Potri.010G226300.7 | 52.1148 | 106.0965 | -1.0256 | Down | 1.88E-24 | 9.66E-24 |
| Unigene24259  | Potri.015G028100.1 | 8.0837  | 16.4581  | -1.0257 | Down | 2.99E-11 | 9.13E-11 |
| Unigene50918  | Potri.010G129700.3 | 4.5505  | 9.2646   | -1.0257 | Down | 2.99E-11 | 9.13E-11 |
| Unigene6348   | Potri.010G122500.6 | 23.5941 | 48.0353  | -1.0257 | Down | 6.03E-12 | 1.91E-11 |
| Unigene53653  | Potri.006G264500.1 | 20.1576 | 41.0402  | -1.0257 | Down | 2.99E-11 | 9.13E-11 |
| Unigene41766  | Potri.003G163000.2 | 25.0506 | 51.0005  | -1.0257 | Down | 2.16E-22 | 1.04E-21 |
| Unigene4934   | Potri.005G170000.1 | 9.2163  | 18.767   | -1.0259 | Down | 3.43E-16 | 1.32E-15 |
| Unigene18807  | Potri.003G140000.1 | 9.2555  | 18.8462  | -1.0259 | Down | 3.69E-09 | 1.00E-08 |
| Unigene13181  | Potri.001G158800.1 | 11.6185 | 23.6574  | -1.0259 | Down | 3.13E-25 | 1.65E-24 |
| Unigene28630  | Potri.009G135400.2 | 3.0606  | 6.2325   | -1.026  | Down | 1.85E-08 | 4.82E-08 |
| Unigene10426  | Potri.004G088000.1 | 29.3875 | 59.8429  | -1.026  | Down | 1.93E-29 | 1.15E-28 |
| Unigene40385  | Potri.004G036100.3 | 32.18   | 65.5308  | -1.026  | Down | 8.54E-22 | 4.03E-21 |
| Unigene12109  | Potri.010G254900.6 | 36.9228 | 75.195   | -1.0261 | Down | 1.37E-31 | 8.72E-31 |
| Unigene30177  | Potri.010G109500.2 | 17.258  | 35.1471  | -1.0261 | Down | 2.00E-13 | 6.80E-13 |
| Unigene38508  | Potri.002G119600.1 | 17.2852 | 35.2029  | -1.0262 | Down | 4.84E-19 | 2.08E-18 |
| Unigene6032   | Potri.014G146900.5 | 30.4505 | 62.0228  | -1.0263 | Down | 8.70E-27 | 4.81E-26 |
| Unigene51878  | Potri.001G143200.3 | 15.2084 | 30.9761  | -1.0263 | Down | 4.88E-12 | 1.55E-11 |
| Unigene43740  | Potri.012G069900.2 | 5.7801  | 11.7734  | -1.0264 | Down | 2.42E-11 | 7.43E-11 |
| Unigene7199   | Potri.010G190500.1 | 6.98    | 14.2176  | -1.0264 | Down | 2.40E-06 | 5.35E-06 |
| Unigene102567 | Potri.005G163900.2 | 3.9263  | 7.9974   | -1.0264 | Down | 2.40E-06 | 5.35E-06 |
| Unigene48715  | Potri.002G140200.1 | 32.5039 | 66.2099  | -1.0264 | Down | 1.36E-15 | 5.09E-15 |

|               |                    |         |          |         |      |          |          |
|---------------|--------------------|---------|----------|---------|------|----------|----------|
| Unigene25909  | Potri.018G052200.1 | 41.0767 | 83.6768  | -1.0265 | Down | 2.99E-28 | 1.73E-27 |
| Unigene49020  | Potri.008G103000.2 | 10.6698 | 21.7348  | -1.0265 | Down | 1.20E-10 | 3.55E-10 |
| Unigene23609  | Potri.017G118800.1 | 2.7987  | 5.7016   | -1.0266 | Down | 1.23E-05 | 2.59E-05 |
| Unigene109900 | Potri.007G080800.2 | 28.2313 | 57.5128  | -1.0266 | Down | 3.29E-14 | 1.16E-13 |
| Unigene32336  | Potri.014G166800.8 | 24.4137 | 49.7438  | -1.0268 | Down | 1.87E-63 | 2.36E-62 |
| Unigene43451  | Potri.005G023700.1 | 6.774   | 13.8022  | -1.0268 | Down | 3.30E-38 | 2.48E-37 |
| Unigene43672  | Potri.016G094700.5 | 2.836   | 5.7787   | -1.0269 | Down | 6.41E-05 | 1.25E-04 |
| Unigene35335  | Potri.006G107300.3 | 21.0956 | 42.985   | -1.0269 | Down | 3.95E-12 | 1.26E-11 |
| Unigene79909  | Potri.002G135100.1 | 14.0064 | 28.5397  | -1.0269 | Down | 1.49E-08 | 3.91E-08 |
| Unigene28007  | Potri.014G170100.1 | 26.6649 | 54.3385  | -1.027  | Down | 9.54E-28 | 5.43E-27 |
| Unigene31322  | Potri.013G043000.1 | 30.6492 | 62.4584  | -1.027  | Down | 7.59E-18 | 3.12E-17 |
| Unigene13539  | Potri.008G208300.1 | 4.8931  | 9.971    | -1.027  | Down | 5.41E-15 | 1.97E-14 |
| Unigene53783  | Potri.004G182900.2 | 16.8239 | 34.2839  | -1.027  | Down | 1.95E-11 | 6.03E-11 |
| Unigene24193  | Potri.001G358400.4 | 18.5702 | 37.8415  | -1.027  | Down | 1.97E-28 | 1.14E-27 |
| Unigene79859  | Potri.003G100600.4 | 12.688  | 25.8569  | -1.0271 | Down | 7.50E-08 | 1.88E-07 |
| Unigene77019  | Potri.006G133000.2 | 25.5722 | 52.1179  | -1.0272 | Down | 1.31E-13 | 4.49E-13 |
| Unigene10482  | Potri.005G040600.1 | 10.1726 | 20.7319  | -1.0272 | Down | 5.27E-20 | 2.34E-19 |
| Unigene50519  | Potri.004G218600.1 | 4.4939  | 9.1587   | -1.0272 | Down | 9.69E-11 | 2.88E-10 |
| Unigene21815  | Potri.003G158900.1 | 6.52    | 13.2886  | -1.0272 | Down | 5.08E-37 | 3.71E-36 |
| Unigene38331  | Potri.016G077400.2 | 3.9207  | 7.9914   | -1.0273 | Down | 3.39E-04 | 6.13E-04 |
| Unigene20219  | Potri.011G009600.1 | 8.5125  | 17.3506  | -1.0273 | Down | 2.59E-24 | 1.32E-23 |
| Unigene38365  | Potri.008G150500.2 | 7.0412  | 14.3519  | -1.0273 | Down | 3.79E-07 | 9.02E-07 |
| Unigene53804  | Potri.007G014100.1 | 9.4204  | 19.2011  | -1.0273 | Down | 3.79E-07 | 9.02E-07 |
| Unigene38413  | Potri.006G256400.1 | 3.2396  | 6.6032   | -1.0273 | Down | 3.39E-04 | 6.13E-04 |
| Unigene161    | Potri.004G217600.1 | 9.496   | 19.355   | -1.0273 | Down | 6.03E-59 | 7.04E-58 |
| Unigene104745 | Potri.003G080900.2 | 3.5846  | 7.3064   | -1.0273 | Down | 3.39E-04 | 6.13E-04 |
| Unigene12336  | Potri.010G087600.1 | 34.1794 | 69.6747  | -1.0275 | Down | 1.43E-38 | 1.08E-37 |
| Unigene22860  | Potri.011G095700.1 | 20.257  | 41.296   | -1.0276 | Down | 3.05E-27 | 1.71E-26 |
| Unigene2759   | Potri.003G204900.2 | 11.5073 | 23.4592  | -1.0276 | Down | 2.08E-19 | 9.08E-19 |
| Unigene14761  | Potri.015G049500.1 | 20.4885 | 41.77    | -1.0277 | Down | 1.47E-16 | 5.74E-16 |
| Unigene15305  | Potri.002G135500.1 | 55.5156 | 113.1831 | -1.0277 | Down | 8.88E-46 | 7.93E-45 |
| Unigene346    | Potri.003G181000.1 | 30.5994 | 62.3886  | -1.0278 | Down | 6.32E-80 | 1.04E-78 |
| Unigene99940  | Potri.003G143000.1 | 8.2006  | 16.7201  | -1.0278 | Down | 1.20E-08 | 3.16E-08 |
| Unigene50216  | Potri.018G033400.1 | 4.4334  | 9.0397   | -1.0279 | Down | 7.83E-11 | 2.34E-10 |
| Unigene84842  | Potri.013G055800.4 | 64.1499 | 130.8157 | -1.028  | Down | 7.61E-39 | 5.80E-38 |
| Unigene43891  | Potri.014G093100.1 | 15.7643 | 32.1482  | -1.0281 | Down | 8.25E-19 | 3.51E-18 |
| Unigene28145  | Potri.010G215200.1 | 10.3065 | 21.0179  | -1.0281 | Down | 6.05E-08 | 1.52E-07 |
| Unigene39697  | Potri.008G216600.1 | 7.084   | 14.4464  | -1.0281 | Down | 1.19E-16 | 4.66E-16 |
| Unigene22571  | Potri.006G247100.1 | 3.784   | 7.7167   | -1.0281 | Down | 9.91E-06 | 2.09E-05 |

|               |                    |         |         |         |      |          |          |
|---------------|--------------------|---------|---------|---------|------|----------|----------|
| Unigene44269  | Potri.001G420400.1 | 17.2649 | 35.2118 | -1.0282 | Down | 5.85E-16 | 2.22E-15 |
| Unigene87347  | Potri.014G103600.1 | 52.2669 | 106.606 | -1.0283 | Down | 2.02E-35 | 1.41E-34 |
| Unigene10410  | Potri.013G161700.3 | 8.5549  | 17.4505 | -1.0284 | Down | 3.06E-07 | 7.32E-07 |
| Unigene48708  | Potri.006G127100.1 | 11.6077 | 23.6776 | -1.0284 | Down | 3.06E-07 | 7.32E-07 |
| Unigene6917   | Potri.005G021900.1 | 15.413  | 31.4397 | -1.0284 | Down | 4.23E-13 | 1.42E-12 |
| Unigene38397  | Potri.003G085400.1 | 6.3579  | 12.9689 | -1.0284 | Down | 3.06E-07 | 7.32E-07 |
| Unigene32273  | Potri.001G148600.2 | 6.6527  | 13.5703 | -1.0284 | Down | 4.23E-13 | 1.42E-12 |
| Unigene10725  | Potri.010G113700.1 | 3.2434  | 6.616   | -1.0285 | Down | 4.23E-13 | 1.42E-12 |
| Unigene31848  | Potri.006G115600.2 | 23.3917 | 47.7182 | -1.0285 | Down | 3.45E-72 | 5.02E-71 |
| Unigene26432  | Potri.005G161800.2 | 36.4759 | 74.4124 | -1.0286 | Down | 1.86E-25 | 9.87E-25 |
| Unigene42775  | Potri.001G381300.1 | 39.5583 | 80.6993 | -1.0286 | Down | 2.21E-51 | 2.22E-50 |
| Unigene16993  | Potri.013G111400.1 | 23.0063 | 46.9355 | -1.0287 | Down | 1.11E-19 | 4.87E-19 |
| Unigene993    | Potri.008G169300.1 | 6.1938  | 12.6372 | -1.0288 | Down | 5.41E-19 | 2.32E-18 |
| Unigene41004  | Potri.005G238700.1 | 14.5843 | 29.7565 | -1.0288 | Down | 3.15E-10 | 9.10E-10 |
| Unigene51946  | Potri.015G143600.1 | 23.192  | 47.3241 | -1.0289 | Down | 2.64E-18 | 1.10E-17 |
| Unigene27625  | Potri.013G159700.1 | 37.5837 | 76.6963 | -1.029  | Down | 2.61E-42 | 2.16E-41 |
| Unigene39725  | Potri.004G050900.1 | 9.2953  | 18.9681 | -1.029  | Down | 8.97E-20 | 3.96E-19 |
| Unigene35439  | Potri.003G178000.1 | 8.9058  | 18.1736 | -1.029  | Down | 4.88E-08 | 1.23E-07 |
| Unigene54234  | Potri.001G465300.2 | 9.6774  | 19.7474 | -1.029  | Down | 3.42E-13 | 1.15E-12 |
| Unigene1694   | Potri.010G246000.1 | 5.5949  | 11.4177 | -1.0291 | Down | 3.83E-16 | 1.47E-15 |
| Unigene2145   | Potri.001G115500.1 | 17.3453 | 35.3963 | -1.0291 | Down | 2.97E-29 | 1.77E-28 |
| Unigene49592  | Potri.001G056800.1 | 21.8932 | 44.678  | -1.0291 | Down | 3.83E-16 | 1.47E-15 |
| Unigene94354  | Potri.010G185800.3 | 18.6498 | 38.0679 | -1.0294 | Down | 1.99E-37 | 1.47E-36 |
| Unigene937    | Potri.017G114800.3 | 2.5042  | 5.1119  | -1.0295 | Down | 2.71E-04 | 4.96E-04 |
| Unigene30140  | Potri.016G033300.1 | 5.857   | 11.9559 | -1.0295 | Down | 2.71E-04 | 4.96E-04 |
| Unigene13024  | Potri.016G000100.1 | 2.7554  | 5.6247  | -1.0295 | Down | 7.85E-09 | 2.09E-08 |
| Unigene44015  | Potri.006G223300.1 | 1.9631  | 4.0074  | -1.0295 | Down | 2.71E-04 | 4.96E-04 |
| Unigene102202 | Potri.005G200100.4 | 6.3846  | 13.033  | -1.0295 | Down | 2.71E-04 | 4.96E-04 |
| Unigene36251  | Potri.001G344100.6 | 9.0858  | 18.547  | -1.0295 | Down | 7.97E-06 | 1.70E-05 |
| Unigene12441  | Potri.001G139600.2 | 3.1083  | 6.345   | -1.0295 | Down | 7.97E-06 | 1.70E-05 |
| Unigene1580   | Potri.011G167500.1 | 10.8745 | 22.2014 | -1.0297 | Down | 5.13E-17 | 2.04E-16 |
| Unigene28898  | Potri.001G417000.1 | 6.2011  | 12.6602 | -1.0297 | Down | 5.13E-17 | 2.04E-16 |
| Unigene3790   | Potri.002G051900.1 | 24.8974 | 50.8343 | -1.0298 | Down | 3.33E-22 | 1.59E-21 |
| Unigene84136  | Potri.001G262400.7 | 43.7864 | 89.3975 | -1.0298 | Down | 1.34E-26 | 7.36E-26 |
| Unigene3024   | Potri.001G167200.1 | 7.388   | 15.0844 | -1.0298 | Down | 3.33E-22 | 1.59E-21 |
| Unigene19475  | Potri.T093800.1    | 38.1559 | 77.9101 | -1.0299 | Down | 1.53E-32 | 9.96E-32 |
| Unigene40189  | Potri.017G142400.1 | 15.5891 | 31.8316 | -1.0299 | Down | 2.51E-16 | 9.69E-16 |
| Unigene43570  | Potri.011G069300.2 | 29.7359 | 60.7202 | -1.03   | Down | 1.30E-54 | 1.39E-53 |
| Unigene39295  | Potri.016G067800.1 | 9.3249  | 19.043  | -1.0301 | Down | 1.25E-06 | 2.86E-06 |

|               |                    |         |          |         |      |          |          |
|---------------|--------------------|---------|----------|---------|------|----------|----------|
| Unigene21454  | Potri.015G089300.1 | 8.0589  | 16.4584  | -1.0302 | Down | 1.44E-38 | 1.09E-37 |
| Unigene15546  | Potri.004G203400.1 | 15.0452 | 30.7299  | -1.0303 | Down | 6.33E-09 | 1.69E-08 |
| Unigene107856 | Potri.014G081000.2 | 19.4766 | 39.7893  | -1.0306 | Down | 1.02E-09 | 2.87E-09 |
| Unigene34645  | Potri.005G213500.1 | 8.1161  | 16.581   | -1.0307 | Down | 1.14E-30 | 7.08E-30 |
| Unigene109597 | Potri.005G247900.6 | 15.0234 | 30.697   | -1.0309 | Down | 3.18E-08 | 8.15E-08 |
| Unigene29121  | Potri.004G081200.1 | 2.9026  | 5.9307   | -1.0309 | Down | 3.18E-08 | 8.15E-08 |
| Unigene37093  | Potri.003G086400.1 | 19.1449 | 39.1183  | -1.0309 | Down | 1.66E-10 | 4.87E-10 |
| Unigene86310  | Potri.001G130900.1 | 21.6337 | 44.2037  | -1.0309 | Down | 4.90E-15 | 1.79E-14 |
| Unigene78658  | Potri.001G066800.1 | 22.7245 | 46.4325  | -1.0309 | Down | 8.93E-13 | 2.94E-12 |
| Unigene34845  | Potri.010G103300.1 | 12.4423 | 25.4251  | -1.031  | Down | 8.13E-72 | 1.18E-70 |
| Unigene16982  | Potri.016G034200.4 | 6.2831  | 12.8399  | -1.0311 | Down | 2.70E-11 | 8.28E-11 |
| Unigene27420  | Potri.002G066800.1 | 7.7309  | 15.7993  | -1.0312 | Down | 5.11E-09 | 1.38E-08 |
| Unigene24643  | Potri.015G107000.6 | 5.6239  | 11.4942  | -1.0313 | Down | 1.01E-06 | 2.32E-06 |
| Unigene44574  | Potri.014G092600.2 | 10.3314 | 21.1156  | -1.0313 | Down | 4.41E-12 | 1.41E-11 |
| Unigene10469  | Potri.010G201500.4 | 9.7553  | 19.938   | -1.0313 | Down | 1.01E-06 | 2.32E-06 |
| Unigene51397  | Potri.006G041200.1 | 17.1376 | 35.0263  | -1.0313 | Down | 4.41E-12 | 1.41E-11 |
| Unigene7493   | Potri.002G028900.3 | 3.8842  | 7.9386   | -1.0313 | Down | 1.01E-06 | 2.32E-06 |
| Unigene11778  | Potri.003G212300.1 | 2.8083  | 5.7407   | -1.0315 | Down | 2.17E-04 | 4.01E-04 |
| Unigene13776  | Potri.003G195300.1 | 14.3609 | 29.3549  | -1.0315 | Down | 2.96E-30 | 1.81E-29 |
| Unigene41674  | Potri.017G057700.3 | 4.8009  | 9.8142   | -1.0316 | Down | 2.17E-04 | 4.01E-04 |
| Unigene93804  | Potri.011G115500.1 | 2.2449  | 4.5891   | -1.0316 | Down | 2.17E-04 | 4.01E-04 |
| Unigene17265  | Potri.006G071500.1 | 1.8966  | 3.8771   | -1.0316 | Down | 2.17E-04 | 4.01E-04 |
| Unigene108206 | Potri.005G164700.1 | 7.096   | 14.5059  | -1.0316 | Down | 2.17E-04 | 4.01E-04 |
| Unigene49945  | Potri.004G116800.1 | 9.4307  | 19.2785  | -1.0316 | Down | 1.19E-13 | 4.07E-13 |
| Unigene54026  | Potri.003G077000.1 | 6.766   | 13.8312  | -1.0316 | Down | 2.17E-04 | 4.01E-04 |
| Unigene7518   | Potri.001G397600.1 | 7.0914  | 14.498   | -1.0317 | Down | 2.18E-11 | 6.73E-11 |
| Unigene38098  | Potri.009G136400.7 | 83.3911 | 170.5001 | -1.0318 | Down | 4.71E-50 | 4.61E-49 |
| Unigene33691  | Potri.004G176800.4 | 5.1977  | 10.627   | -1.0318 | Down | 3.21E-15 | 1.18E-14 |
| Unigene20211  | Potri.007G126500.1 | 6.1538  | 12.5832  | -1.0319 | Down | 4.13E-09 | 1.12E-08 |
| Unigene50706  | Potri.004G149400.1 | 2.7077  | 5.5366   | -1.0319 | Down | 3.32E-05 | 6.68E-05 |
| Unigene18275  | Potri.005G139800.1 | 8.6211  | 17.6284  | -1.032  | Down | 3.32E-05 | 6.68E-05 |
| Unigene14805  | Potri.001G387400.2 | 16.6911 | 34.1299  | -1.032  | Down | 4.13E-09 | 1.12E-08 |
| Unigene109566 | Potri.007G049000.6 | 18.6498 | 38.1387  | -1.0321 | Down | 6.68E-10 | 1.90E-09 |
| Unigene23196  | Potri.007G024800.1 | 21.2958 | 43.5511  | -1.0321 | Down | 1.64E-27 | 9.25E-27 |
| Unigene10131  | Potri.001G337600.1 | 25.117  | 51.3658  | -1.0321 | Down | 1.58E-14 | 5.63E-14 |
| Unigene35474  | Potri.018G073100.1 | 17.2983 | 35.3805  | -1.0323 | Down | 1.77E-11 | 5.46E-11 |
| Unigene2181   | Potri.011G004300.2 | 4.4759  | 9.1552   | -1.0324 | Down | 8.13E-07 | 1.89E-06 |
| Unigene13997  | Potri.008G052500.1 | 12.0265 | 24.5994  | -1.0324 | Down | 8.13E-07 | 1.89E-06 |
| Unigene8643   | Potri.001G412100.1 | 10.635  | 21.7531  | -1.0324 | Down | 8.13E-07 | 1.89E-06 |

|               |                    |         |         |         |      |          |          |
|---------------|--------------------|---------|---------|---------|------|----------|----------|
| Unigene25095  | Potri.014G153400.2 | 10.4036 | 21.2806 | -1.0325 | Down | 1.94E-18 | 8.14E-18 |
| Unigene70359  | Potri.005G165200.1 | 3.4769  | 7.1124  | -1.0325 | Down | 7.76E-14 | 2.69E-13 |
| Unigene43877  | Potri.001G375500.2 | 29.5996 | 60.5471 | -1.0325 | Down | 1.68E-47 | 1.56E-46 |
| Unigene37866  | Potri.016G080500.2 | 7.9418  | 16.2471 | -1.0326 | Down | 2.07E-08 | 5.38E-08 |
| Unigene51779  | Potri.017G057400.7 | 21.85   | 44.7031 | -1.0327 | Down | 5.73E-17 | 2.27E-16 |
| Unigene50018  | Potri.012G031400.3 | 6.9411  | 14.2008 | -1.0327 | Down | 5.73E-17 | 2.27E-16 |
| Unigene43725  | Potri.013G111500.2 | 29.5128 | 60.3814 | -1.0328 | Down | 1.88E-25 | 9.97E-25 |
| Unigene49510  | Potri.012G055800.4 | 6.7662  | 13.8443 | -1.0329 | Down | 8.76E-11 | 2.62E-10 |
| Unigene67552  | Potri.001G358800.1 | 6.615   | 13.5348 | -1.0329 | Down | 8.76E-11 | 2.62E-10 |
| Unigene36775  | Potri.014G025400.1 | 24.2691 | 49.6612 | -1.033  | Down | 3.82E-13 | 1.28E-12 |
| Unigene26262  | Potri.003G168500.1 | 18.6175 | 38.0959 | -1.033  | Down | 5.48E-24 | 2.78E-23 |
| Unigene11529  | Potri.012G058100.2 | 27.9747 | 57.2471 | -1.0331 | Down | 2.63E-43 | 2.23E-42 |
| Unigene24391  | Potri.008G194700.3 | 6.2056  | 12.6994 | -1.0331 | Down | 2.81E-16 | 1.08E-15 |
| Unigene6048   | Potri.002G094600.1 | 23.6091 | 48.3126 | -1.0331 | Down | 1.03E-14 | 3.72E-14 |
| Unigene112527 | Potri.001G456300.1 | 28.8919 | 59.125  | -1.0331 | Down | 2.81E-16 | 1.08E-15 |
| Unigene18034  | Potri.014G192200.1 | 2.914   | 5.965   | -1.0335 | Down | 1.04E-07 | 2.58E-07 |
| Unigene48799  | Potri.013G021800.1 | 2.3533  | 4.8172  | -1.0335 | Down | 1.74E-04 | 3.25E-04 |
| Unigene12719  | Potri.010G204300.1 | 7.7349  | 15.8333 | -1.0335 | Down | 1.67E-08 | 4.36E-08 |
| Unigene80044  | Potri.010G099000.2 | 28.8086 | 58.971  | -1.0335 | Down | 2.27E-16 | 8.78E-16 |
| Unigene71665  | Potri.010G065600.2 | 9.142   | 18.7137 | -1.0335 | Down | 2.67E-05 | 5.42E-05 |
| Unigene63172  | Potri.008G162400.3 | 6.3086  | 12.9136 | -1.0335 | Down | 1.04E-07 | 2.58E-07 |
| Unigene82870  | Potri.008G126900.2 | 40.8184 | 83.5549 | -1.0335 | Down | 3.60E-24 | 1.84E-23 |
| Unigene40088  | Potri.007G124400.1 | 4.2028  | 8.603   | -1.0335 | Down | 1.04E-07 | 2.58E-07 |
| Unigene12966  | Potri.007G056400.1 | 2.7467  | 5.6224  | -1.0335 | Down | 2.67E-05 | 5.42E-05 |
| Unigene33287  | Potri.006G185200.2 | 21.7702 | 44.5634 | -1.0335 | Down | 6.00E-25 | 3.14E-24 |
| Unigene24228  | Potri.006G180100.1 | 8.4068  | 17.2086 | -1.0335 | Down | 2.27E-16 | 8.78E-16 |
| Unigene1720   | Potri.006G018600.1 | 7.2977  | 14.9384 | -1.0335 | Down | 1.67E-08 | 4.36E-08 |
| Unigene42058  | Potri.005G083600.2 | 14.8604 | 30.4191 | -1.0335 | Down | 2.69E-09 | 7.38E-09 |
| Unigene4854   | Potri.003G186600.3 | 9.6882  | 19.8317 | -1.0335 | Down | 4.15E-06 | 9.07E-06 |
| Unigene46156  | Potri.003G171300.1 | 14.9659 | 30.635  | -1.0335 | Down | 1.15E-11 | 3.60E-11 |
| Unigene23736  | Potri.003G046600.2 | 7.7268  | 15.8168 | -1.0335 | Down | 4.36E-10 | 1.25E-09 |
| Unigene28552  | Potri.002G013100.2 | 4.9425  | 10.1173 | -1.0335 | Down | 3.09E-13 | 1.04E-12 |
| Unigene9849   | Potri.001G272300.1 | 12.6172 | 25.8273 | -1.0335 | Down | 5.08E-14 | 1.77E-13 |
| Unigene97824  | Potri.001G246100.1 | 2.9469  | 6.0323  | -1.0335 | Down | 6.55E-07 | 1.53E-06 |
| Unigene6656   | Potri.001G087800.1 | 15.0488 | 30.8048 | -1.0335 | Down | 1.89E-12 | 6.12E-12 |
| Unigene35918  | Potri.001G044000.2 | 25.1624 | 51.5072 | -1.0335 | Down | 8.36E-15 | 3.02E-14 |
| Unigene34763  | Potri.007G008200.1 | 17.8059 | 36.4576 | -1.0339 | Down | 5.03E-18 | 2.08E-17 |
| Unigene35581  | Potri.T034400.2    | 16.5433 | 33.8751 | -1.034  | Down | 4.11E-14 | 1.44E-13 |
| Unigene34489  | Potri.006G187700.1 | 5.7042  | 11.6807 | -1.034  | Down | 1.53E-12 | 4.98E-12 |

|               |                    |         |         |         |      |          |          |
|---------------|--------------------|---------|---------|---------|------|----------|----------|
| Unigene21991  | Potri.013G035100.1 | 5.9404  | 12.1662 | -1.0342 | Down | 2.22E-57 | 2.51E-56 |
| Unigene39980  | Potri.011G075600.3 | 16.6734 | 34.1458 | -1.0342 | Down | 1.12E-19 | 4.92E-19 |
| Unigene45997  | Potri.005G239900.1 | 16.3323 | 33.448  | -1.0342 | Down | 6.75E-19 | 2.88E-18 |
| Unigene23190  | Potri.001G360800.1 | 11.2609 | 23.0619 | -1.0342 | Down | 1.48E-27 | 8.39E-27 |
| Unigene21690  | Potri.019G039600.1 | 4.1411  | 8.4816  | -1.0343 | Down | 1.15E-23 | 5.77E-23 |
| Unigene89439  | Potri.017G014800.2 | 18.0211 | 36.9117 | -1.0344 | Down | 5.47E-15 | 1.99E-14 |
| Unigene17340  | Potri.002G140200.1 | 16.9734 | 34.767  | -1.0344 | Down | 3.32E-14 | 1.17E-13 |
| Unigene50631  | Potri.001G271200.1 | 6.3606  | 13.0285 | -1.0344 | Down | 8.40E-08 | 2.09E-07 |
| Unigene33530  | Potri.009G110100.2 | 17.8266 | 36.5153 | -1.0345 | Down | 4.32E-26 | 2.34E-25 |
| Unigene49457  | Potri.014G130400.1 | 37.3916 | 76.5999 | -1.0346 | Down | 2.88E-33 | 1.91E-32 |
| Unigene17292  | Potri.015G025800.1 | 4.4789  | 9.1761  | -1.0347 | Down | 3.34E-06 | 7.38E-06 |
| Unigene31287  | Potri.010G012700.1 | 23.7608 | 48.6792 | -1.0347 | Down | 1.10E-35 | 7.75E-35 |
| Unigene39180  | Potri.002G240100.1 | 11.7227 | 24.0154 | -1.0347 | Down | 7.55E-12 | 2.38E-11 |
| Unigene108648 | Potri.001G348700.1 | 10.8865 | 22.3038 | -1.0347 | Down | 3.34E-06 | 7.38E-06 |
| Unigene45199  | Potri.009G101500.4 | 15.273  | 31.2921 | -1.0348 | Down | 1.32E-28 | 7.68E-28 |
| Unigene3553   | Potri.007G019500.2 | 43.2084 | 88.5268 | -1.0348 | Down | 7.34E-20 | 3.25E-19 |
| Unigene35709  | Potri.010G114100.7 | 12.039  | 24.667  | -1.0349 | Down | 2.84E-10 | 8.25E-10 |
| Unigene16976  | Potri.005G202100.3 | 8.6851  | 17.7951 | -1.0349 | Down | 2.84E-10 | 8.25E-10 |
| Unigene53206  | Potri.015G066200.2 | 7.5788  | 15.5297 | -1.035  | Down | 2.14E-05 | 4.39E-05 |
| Unigene64733  | Potri.011G082100.3 | 8.0435  | 16.4819 | -1.035  | Down | 1.76E-09 | 4.86E-09 |
| Unigene81319  | Potri.010G220900.1 | 14.9786 | 30.6926 | -1.035  | Down | 1.76E-09 | 4.86E-09 |
| Unigene38720  | Potri.010G052600.2 | 3.8046  | 7.7959  | -1.035  | Down | 2.14E-05 | 4.39E-05 |
| Unigene20975  | Potri.005G082500.1 | 3.0243  | 6.1971  | -1.035  | Down | 2.14E-05 | 4.39E-05 |
| Unigene378    | Potri.008G068100.1 | 7.5926  | 15.5593 | -1.0351 | Down | 6.12E-24 | 3.10E-23 |
| Unigene17135  | Potri.010G139100.1 | 6.852   | 14.0426 | -1.0352 | Down | 6.10E-12 | 1.93E-11 |
| Unigene50237  | Potri.008G133800.1 | 3.9671  | 8.13    | -1.0352 | Down | 5.91E-16 | 2.24E-15 |
| Unigene27362  | Potri.013G020500.2 | 6.3987  | 13.1148 | -1.0353 | Down | 1.40E-04 | 2.64E-04 |
| Unigene29000  | Potri.007G052500.9 | 3.8749  | 7.942   | -1.0353 | Down | 3.74E-11 | 1.14E-10 |
| Unigene23996  | Potri.002G205900.5 | 10.3343 | 21.1801 | -1.0353 | Down | 2.16E-18 | 9.07E-18 |
| Unigene77228  | Potri.019G127000.2 | 26.5962 | 54.5121 | -1.0354 | Down | 2.18E-14 | 7.72E-14 |
| Unigene104525 | Potri.014G069600.2 | 3.6411  | 7.463   | -1.0354 | Down | 1.40E-04 | 2.64E-04 |
| Unigene60789  | Potri.013G021500.1 | 6.1253  | 12.5545 | -1.0354 | Down | 7.99E-21 | 3.66E-20 |
| Unigene84941  | Potri.001G281300.5 | 32.4229 | 66.4547 | -1.0354 | Down | 7.99E-21 | 3.66E-20 |
| Unigene14755  | Potri.001G109500.1 | 16.2723 | 33.3549 | -1.0355 | Down | 1.32E-13 | 4.54E-13 |
| Unigene45370  | Potri.004G153500.1 | 5.6898  | 11.6639 | -1.0356 | Down | 4.25E-07 | 1.01E-06 |
| Unigene78182  | Potri.001G144000.6 | 11.4279 | 23.4271 | -1.0356 | Down | 4.25E-07 | 1.01E-06 |
| Unigene16321  | Potri.015G133400.1 | 31.7238 | 65.042  | -1.0358 | Down | 2.04E-27 | 1.15E-26 |
| Unigene26722  | Potri.004G007900.1 | 7.5084  | 15.3956 | -1.0359 | Down | 2.69E-06 | 5.97E-06 |
| Unigene17513  | Potri.002G077700.1 | 4.7003  | 9.6379  | -1.036  | Down | 2.69E-06 | 5.97E-06 |

|              |                    |         |          |         |      |          |          |
|--------------|--------------------|---------|----------|---------|------|----------|----------|
| Unigene52614 | Potri.018G062500.4 | 10.923  | 22.3994  | -1.0361 | Down | 2.35E-15 | 8.69E-15 |
| Unigene210   | Potri.006G102000.2 | 7.7533  | 15.8999  | -1.0361 | Down | 7.06E-22 | 3.34E-21 |
| Unigene73601 | Potri.010G186800.1 | 73.0156 | 149.7468 | -1.0362 | Down | 4.36E-34 | 2.95E-33 |
| Unigene8395  | Potri.015G020800.2 | 9.1458  | 18.7571  | -1.0363 | Down | 1.43E-14 | 5.10E-14 |
| Unigene16819 | Potri.015G074100.2 | 5.0118  | 10.2799  | -1.0364 | Down | 1.72E-05 | 3.55E-05 |
| Unigene27782 | Potri.001G043000.3 | 4.4794  | 9.1878   | -1.0364 | Down | 1.72E-05 | 3.55E-05 |
| Unigene60398 | Potri.016G082300.1 | 76.9416 | 157.8289 | -1.0365 | Down | 4.80E-35 | 3.33E-34 |
| Unigene89738 | Potri.010G201600.2 | 36.3748 | 74.6139  | -1.0365 | Down | 2.46E-29 | 1.46E-28 |
| Unigene29042 | Potri.005G053500.1 | 3.012   | 6.1789   | -1.0366 | Down | 3.43E-07 | 8.17E-07 |
| Unigene32725 | Potri.018G120500.1 | 9.8146  | 20.1348  | -1.0367 | Down | 7.73E-41 | 6.19E-40 |
| Unigene37896 | Potri.016G096500.1 | 26.5618 | 54.4936  | -1.0367 | Down | 2.54E-16 | 9.79E-16 |
| Unigene11642 | Potri.002G144800.1 | 7.1774  | 14.725   | -1.0367 | Down | 2.54E-16 | 9.79E-16 |
| Unigene61608 | Potri.009G048700.1 | 6.7481  | 13.8462  | -1.0369 | Down | 1.89E-34 | 1.29E-33 |
| Unigene23896 | Potri.006G102100.1 | 25.0395 | 51.3789  | -1.037  | Down | 1.68E-20 | 7.60E-20 |
| Unigene89009 | Potri.004G161800.3 | 81.3906 | 167.0125 | -1.037  | Down | 1.07E-60 | 1.28E-59 |
| Unigene6741  | Potri.019G085900.2 | 2.9783  | 6.1118   | -1.0371 | Down | 1.12E-04 | 2.13E-04 |
| Unigene9059  | Potri.008G185400.2 | 7.1533  | 14.6795  | -1.0371 | Down | 1.12E-04 | 2.13E-04 |
| Unigene47345 | Potri.005G190400.1 | 20.7037 | 42.4866  | -1.0371 | Down | 1.97E-11 | 6.09E-11 |
| Unigene9684  | Potri.005G072700.5 | 7.2751  | 14.9295  | -1.0371 | Down | 2.17E-06 | 4.84E-06 |
| Unigene50730 | Potri.002G201200.2 | 6.9318  | 14.2249  | -1.0371 | Down | 4.41E-08 | 1.12E-07 |
| Unigene49727 | Potri.001G159400.1 | 10.1726 | 20.8754  | -1.0371 | Down | 4.41E-08 | 1.12E-07 |
| Unigene46233 | Potri.006G215200.1 | 15.6715 | 32.1634  | -1.0373 | Down | 6.10E-19 | 2.61E-18 |
| Unigene25933 | Potri.009G017400.4 | 19.0606 | 39.123   | -1.0374 | Down | 1.21E-10 | 3.59E-10 |
| Unigene77176 | Potri.001G220800.3 | 42.8134 | 87.8833  | -1.0375 | Down | 2.46E-22 | 1.18E-21 |
| Unigene74954 | Potri.013G159600.2 | 52.5273 | 107.8364 | -1.0377 | Down | 1.01E-25 | 5.40E-25 |
| Unigene11104 | Potri.003G022100.4 | 7.7489  | 15.9083  | -1.0377 | Down | 4.86E-34 | 3.29E-33 |
| Unigene11626 | Potri.009G055900.1 | 6.253   | 12.8376  | -1.0378 | Down | 4.48E-24 | 2.28E-23 |
| Unigene46776 | Potri.005G085500.2 | 5.9544  | 12.225   | -1.0378 | Down | 1.38E-05 | 2.89E-05 |
| Unigene35931 | Potri.004G058400.1 | 12.3555 | 25.3669  | -1.0378 | Down | 7.47E-10 | 2.11E-09 |
| Unigene12416 | Potri.005G092800.3 | 4.5228  | 9.2867   | -1.0379 | Down | 3.56E-08 | 9.10E-08 |
| Unigene7647  | Potri.012G061400.1 | 4.0804  | 8.3784   | -1.038  | Down | 3.56E-08 | 9.10E-08 |
| Unigene30043 | Potri.007G134700.1 | 10.4653 | 21.4899  | -1.038  | Down | 9.79E-11 | 2.92E-10 |
| Unigene37872 | Potri.009G076000.2 | 13.4623 | 27.6444  | -1.0381 | Down | 1.62E-22 | 7.81E-22 |
| Unigene41359 | Potri.006G075000.1 | 19.7983 | 40.6566  | -1.0381 | Down | 8.15E-16 | 3.07E-15 |
| Unigene67708 | Potri.002G100000.1 | 6.4171  | 13.179   | -1.0382 | Down | 1.74E-06 | 3.94E-06 |
| Unigene9538  | Potri.004G161700.3 | 28.8666 | 59.2877  | -1.0383 | Down | 1.31E-22 | 6.35E-22 |
| Unigene30308 | Potri.010G022100.1 | 33.2936 | 68.382   | -1.0384 | Down | 5.03E-31 | 3.14E-30 |
| Unigene30941 | Potri.001G033900.1 | 10.0026 | 20.5458  | -1.0385 | Down | 6.03E-10 | 1.72E-09 |
| Unigene18048 | Potri.005G232200.1 | 10.9186 | 22.4307  | -1.0387 | Down | 3.00E-14 | 1.06E-13 |

|               |                    |         |          |         |      |          |          |
|---------------|--------------------|---------|----------|---------|------|----------|----------|
| Unigene35010  | Potri.018G082800.2 | 9.4207  | 19.355   | -1.0388 | Down | 4.00E-15 | 1.47E-14 |
| Unigene41673  | Potri.010G078700.1 | 3.0844  | 6.3369   | -1.0388 | Down | 8.97E-05 | 1.73E-04 |
| Unigene12965  | Potri.008G030000.1 | 7.1442  | 14.6779  | -1.0388 | Down | 2.87E-08 | 7.38E-08 |
| Unigene46185  | Potri.003G110000.3 | 4.7877  | 9.8364   | -1.0388 | Down | 8.97E-05 | 1.73E-04 |
| Unigene45742  | Potri.001G278800.2 | 22.3797 | 45.9794  | -1.0388 | Down | 1.04E-11 | 3.26E-11 |
| Unigene12383  | Potri.001G173800.1 | 22.4548 | 46.1322  | -1.0388 | Down | 1.38E-34 | 9.46E-34 |
| Unigene9547   | Potri.007G028900.2 | 44.3107 | 91.0462  | -1.0389 | Down | 6.40E-39 | 4.89E-38 |
| Unigene42137  | Potri.004G230500.2 | 29.2545 | 60.109   | -1.0389 | Down | 1.16E-23 | 5.82E-23 |
| Unigene112617 | Potri.016G131900.1 | 14.7676 | 30.3439  | -1.039  | Down | 3.73E-09 | 1.01E-08 |
| Unigene22127  | Potri.013G142200.1 | 25.1691 | 51.7166  | -1.039  | Down | 3.63E-32 | 2.34E-31 |
| Unigene30484  | Potri.T022500.1    | 9.1139  | 18.7289  | -1.0391 | Down | 1.11E-05 | 2.34E-05 |
| Unigene2559   | Potri.018G124600.1 | 16.2871 | 33.4696  | -1.0391 | Down | 2.43E-14 | 8.60E-14 |
| Unigene12825  | Potri.016G019800.3 | 15.5816 | 32.0185  | -1.0391 | Down | 5.17E-22 | 2.46E-21 |
| Unigene17759  | Potri.006G234800.2 | 18.4787 | 37.9732  | -1.0391 | Down | 1.28E-18 | 5.41E-18 |
| Unigene115797 | Potri.010G051700.1 | 14.845  | 30.5085  | -1.0392 | Down | 6.39E-11 | 1.92E-10 |
| Unigene45120  | Potri.002G016600.1 | 17.3547 | 35.6644  | -1.0392 | Down | 5.23E-28 | 2.99E-27 |
| Unigene42956  | Potri.007G047700.1 | 2.8029  | 5.7607   | -1.0393 | Down | 1.40E-06 | 3.19E-06 |
| Unigene37230  | Potri.008G059100.2 | 10.4991 | 21.5809  | -1.0395 | Down | 1.79E-07 | 4.36E-07 |
| Unigene44038  | Potri.004G123800.1 | 6.2716  | 12.8913  | -1.0395 | Down | 1.79E-07 | 4.36E-07 |
| Unigene25364  | Potri.002G124700.1 | 9.8089  | 20.1621  | -1.0395 | Down | 1.79E-07 | 4.36E-07 |
| Unigene13823  | Potri.012G021400.2 | 5.8133  | 11.9506  | -1.0397 | Down | 3.50E-16 | 1.34E-15 |
| Unigene52813  | Potri.005G255100.1 | 64.7782 | 133.1669 | -1.0397 | Down | 4.79E-53 | 4.98E-52 |
| Unigene76760  | Potri.012G034200.1 | 17.9104 | 36.8217  | -1.0398 | Down | 3.93E-10 | 1.13E-09 |
| Unigene3489   | Potri.010G181900.2 | 21.7279 | 44.6719  | -1.0398 | Down | 5.17E-11 | 1.56E-10 |
| Unigene50464  | Potri.008G021700.1 | 8.7691  | 18.0301  | -1.0399 | Down | 9.01E-13 | 2.97E-12 |
| Unigene49193  | Potri.006G205200.1 | 14.4112 | 29.6315  | -1.0399 | Down | 1.20E-13 | 4.11E-13 |
| Unigene22416  | Potri.003G221600.1 | 19.641  | 40.3824  | -1.0399 | Down | 2.31E-52 | 2.37E-51 |
| Unigene8186   | Potri.003G019600.2 | 19.7724 | 40.6534  | -1.0399 | Down | 3.70E-23 | 1.83E-22 |
| Unigene31175  | Potri.006G150700.1 | 14.16   | 29.1157  | -1.04   | Down | 1.59E-14 | 5.68E-14 |
| Unigene13922  | Potri.008G144200.1 | 35.1883 | 72.3671  | -1.0402 | Down | 3.86E-37 | 2.82E-36 |
| Unigene4632   | Potri.015G041500.1 | 10.7033 | 22.0145  | -1.0404 | Down | 1.13E-06 | 2.59E-06 |
| Unigene53865  | Potri.013G120300.2 | 5.7144  | 11.7533  | -1.0404 | Down | 8.94E-06 | 1.89E-05 |
| Unigene13877  | Potri.013G001400.1 | 6.6686  | 13.7159  | -1.0404 | Down | 4.11E-18 | 1.70E-17 |
| Unigene50776  | Potri.013G000400.2 | 5.1545  | 10.6016  | -1.0404 | Down | 8.94E-06 | 1.89E-05 |
| Unigene6965   | Potri.011G132800.1 | 23.3712 | 48.0696  | -1.0404 | Down | 4.43E-25 | 2.32E-24 |
| Unigene67519  | Potri.011G057700.1 | 6.4869  | 13.3421  | -1.0404 | Down | 1.87E-08 | 4.87E-08 |
| Unigene110900 | Potri.006G109500.6 | 28.9195 | 59.4812  | -1.0404 | Down | 1.72E-15 | 6.38E-15 |
| Unigene35859  | Potri.004G196800.3 | 14.6884 | 30.2108  | -1.0404 | Down | 1.29E-14 | 4.61E-14 |
| Unigene69747  | Potri.003G223600.1 | 2.3682  | 4.8709   | -1.0404 | Down | 7.20E-05 | 1.40E-04 |



|               |                     |         |          |         |      |           |           |
|---------------|---------------------|---------|----------|---------|------|-----------|-----------|
| Unigene60864  | Potri.003G107000.1  | 10.1726 | 20.9229  | -1.0404 | Down | 1.13E-06  | 2.59E-06  |
| Unigene40006  | Potri.002G179300.1  | 9.4683  | 19.4744  | -1.0404 | Down | 5.51E-12  | 1.75E-11  |
| Unigene50082  | Potri.001G471000.1  | 12.3326 | 25.3655  | -1.0404 | Down | 3.28E-24  | 1.67E-23  |
| Unigene36271  | Potri.001G253400.1  | 7.6548  | 15.7442  | -1.0404 | Down | 8.94E-06  | 1.89E-05  |
| Unigene42758  | Potri.008G136800.3  | 10.3488 | 21.2884  | -1.0406 | Down | 8.87E-28  | 5.05E-27  |
| Unigene39193  | Potri.002G063100.1  | 19.0233 | 39.1326  | -1.0406 | Down | 8.87E-28  | 5.05E-27  |
| Unigene22108  | Potri.011G152600.1  | 9.2434  | 19.0178  | -1.0409 | Down | 1.67E-37  | 1.23E-36  |
| Unigene18950  | Potri.006G138500.1  | 8.1192  | 16.7055  | -1.0409 | Down | 4.45E-12  | 1.42E-11  |
| Unigene33572  | Potri.006G116500.5  | 14.3152 | 29.4564  | -1.041  | Down | 4.30E-27  | 2.40E-26  |
| Unigene87712  | Potri.013G071100.2  | 32.404  | 66.6823  | -1.0411 | Down | 1.29E-23  | 6.47E-23  |
| Unigene3141   | Potri.007G006400.2  | 7.7045  | 15.8545  | -1.0411 | Down | 1.59E-31  | 1.01E-30  |
| Unigene23039  | Potri.004G117900.1  | 3.9426  | 8.1134   | -1.0412 | Down | 1.51E-08  | 3.95E-08  |
| Unigene7742   | Potri.001G307600.2  | 7.8852  | 16.2268  | -1.0412 | Down | 9.58E-23  | 4.67E-22  |
| Unigene18283  | Potri.014G073800.4  | 4.9648  | 10.2177  | -1.0413 | Down | 6.33E-14  | 2.20E-13  |
| Unigene17410  | Potri.012G081000.2  | 19.3158 | 39.7546  | -1.0413 | Down | 1.41E-24  | 7.30E-24  |
| Unigene53034  | Potri.012G020500.1  | 14.3318 | 29.4955  | -1.0413 | Down | 1.17E-07  | 2.87E-07  |
| Unigene14528  | Potri.010G075000.3  | 21.159  | 43.5462  | -1.0413 | Down | 6.33E-14  | 2.20E-13  |
| Unigene112559 | Potri.008G048000.1  | 23.8473 | 49.0787  | -1.0413 | Down | 6.33E-14  | 2.20E-13  |
| Unigene19198  | Potri.006G183900.5  | 11.0091 | 22.6595  | -1.0414 | Down | 9.10E-07  | 2.10E-06  |
| Unigene50879  | Potri.002G243400.10 | 35.9134 | 73.9218  | -1.0415 | Down | 1.03E-46  | 9.41E-46  |
| Unigene73303  | Potri.013G067200.1  | 9.9465  | 20.4753  | -1.0416 | Down | 7.19E-06  | 1.54E-05  |
| Unigene719    | Potri.008G199100.4  | 15.165  | 31.2165  | -1.0416 | Down | 3.18E-20  | 1.43E-19  |
| Unigene71499  | Potri.002G135100.1  | 10.2895 | 21.1814  | -1.0416 | Down | 7.19E-06  | 1.54E-05  |
| Unigene1001   | Potri.008G094100.1  | 5.9939  | 12.3394  | -1.0417 | Down | 5.12E-14  | 1.79E-13  |
| Unigene31064  | Potri.003G171200.3  | 9.8362  | 20.25    | -1.0417 | Down | 1.58E-09  | 4.39E-09  |
| Unigene22201  | Potri.007G095300.2  | 63.9243 | 131.6088 | -1.0418 | Down | 4.20E-123 | 1.17E-121 |
| Unigene51584  | Potri.017G080700.1  | 27.6977 | 57.0285  | -1.0419 | Down | 1.92E-19  | 8.36E-19  |
| Unigene50721  | Potri.013G085000.1  | 2.4684  | 5.0822   | -1.0419 | Down | 5.78E-05  | 1.13E-04  |
| Unigene53810  | Potri.005G094200.1  | 5.6514  | 11.6361  | -1.0419 | Down | 5.78E-05  | 1.13E-04  |
| Unigene8440   | Potri.016G032400.1  | 25.5384 | 52.5847  | -1.042  | Down | 1.02E-25  | 5.43E-25  |
| Unigene50176  | Potri.013G088000.2  | 9.2791  | 19.1061  | -1.042  | Down | 1.02E-25  | 5.43E-25  |
| Unigene39499  | Potri.009G024100.1  | 10.4382 | 21.4935  | -1.042  | Down | 7.52E-25  | 3.92E-24  |
| Unigene48764  | Potri.012G060100.1  | 8.7179  | 17.9526  | -1.0421 | Down | 9.40E-08  | 2.33E-07  |
| Unigene24222  | Potri.011G009600.2  | 4.8625  | 10.0131  | -1.0421 | Down | 9.40E-08  | 2.33E-07  |
| Unigene34634  | Potri.007G121800.1  | 5.8005  | 11.9448  | -1.0421 | Down | 2.09E-20  | 9.42E-20  |
| Unigene35249  | Potri.006G228500.3  | 37.2995 | 76.8072  | -1.0421 | Down | 1.07E-17  | 4.35E-17  |
| Unigene39564  | Potri.001G023500.1  | 8.1593  | 16.8016  | -1.0421 | Down | 1.07E-17  | 4.35E-17  |
| Unigene49983  | Potri.016G064100.1  | 27.3692 | 56.3637  | -1.0422 | Down | 1.86E-37  | 1.37E-36  |
| Unigene62     | Potri.009G022900.1  | 11.9005 | 24.5067  | -1.0422 | Down | 2.23E-29  | 1.33E-28  |

|               |                    |         |          |         |      |          |          |
|---------------|--------------------|---------|----------|---------|------|----------|----------|
| Unigene36178  | Potri.005G253100.3 | 16.6595 | 34.3083  | -1.0422 | Down | 1.68E-10 | 4.92E-10 |
| Unigene34362  | Potri.001G252000.1 | 10.135  | 20.8725  | -1.0423 | Down | 6.09E-25 | 3.18E-24 |
| Unigene18517  | Potri.016G051500.1 | 4.1219  | 8.4898   | -1.0424 | Down | 1.28E-09 | 3.56E-09 |
| Unigene102098 | Potri.016G036500.1 | 4.7856  | 9.8567   | -1.0424 | Down | 4.76E-04 | 8.45E-04 |
| Unigene573    | Potri.015G048900.1 | 12.7136 | 26.1858  | -1.0424 | Down | 3.34E-23 | 1.65E-22 |
| Unigene18097  | Potri.013G154600.4 | 4.1444  | 8.5361   | -1.0424 | Down | 7.33E-07 | 1.70E-06 |
| Unigene38912  | Potri.004G186400.1 | 12.9848 | 26.7444  | -1.0424 | Down | 1.28E-09 | 3.56E-09 |
| Unigene39834  | Potri.002G194700.2 | 4.358   | 8.9761   | -1.0424 | Down | 4.76E-04 | 8.45E-04 |
| Unigene25590  | Potri.001G243400.1 | 21.5854 | 44.4642  | -1.0426 | Down | 1.78E-11 | 5.50E-11 |
| Unigene52834  | Potri.019G093600.4 | 12.2096 | 25.1519  | -1.0427 | Down | 9.81E-09 | 2.60E-08 |
| Unigene83919  | Potri.002G204100.1 | 49.5512 | 102.0763 | -1.0427 | Down | 1.61E-30 | 9.92E-30 |
| Unigene4932   | Potri.017G075200.2 | 13.5419 | 27.8993  | -1.0428 | Down | 1.35E-10 | 4.00E-10 |
| Unigene50848  | Potri.009G163800.1 | 44.6962 | 92.0854  | -1.0428 | Down | 1.10E-57 | 1.25E-56 |
| Unigene7730   | Potri.002G214100.3 | 18.6785 | 38.4824  | -1.0428 | Down | 3.53E-53 | 3.68E-52 |
| Unigene5981   | Potri.019G090700.1 | 12.3816 | 25.5118  | -1.043  | Down | 7.58E-08 | 1.90E-07 |
| Unigene14468  | Potri.015G043000.2 | 12.0321 | 24.7917  | -1.043  | Down | 7.58E-08 | 1.90E-07 |
| Unigene81582  | Potri.013G005500.1 | 18.4304 | 37.979   | -1.0431 | Down | 1.44E-11 | 4.47E-11 |
| Unigene118339 | Potri.011G132400.1 | 18.91   | 38.9703  | -1.0432 | Down | 6.14E-19 | 2.63E-18 |
| Unigene11873  | Potri.018G051100.2 | 11.868  | 24.4586  | -1.0433 | Down | 1.94E-24 | 1.00E-23 |
| Unigene39549  | Potri.001G065600.1 | 7.3171  | 15.0798  | -1.0433 | Down | 1.94E-24 | 1.00E-23 |
| Unigene12917  | Potri.017G017700.1 | 2.3731  | 4.8911   | -1.0434 | Down | 4.64E-05 | 9.20E-05 |
| Unigene36306  | Potri.012G100800.1 | 7.9068  | 16.2963  | -1.0434 | Down | 4.64E-05 | 9.20E-05 |
| Unigene68493  | Potri.009G130000.1 | 3.6907  | 7.6068   | -1.0434 | Down | 4.58E-18 | 1.90E-17 |
| Unigene79216  | Potri.009G015100.1 | 10.6791 | 22.0102  | -1.0434 | Down | 5.91E-07 | 1.38E-06 |
| Unigene27493  | Potri.008G178000.2 | 5.836   | 12.0282  | -1.0434 | Down | 4.64E-05 | 9.20E-05 |
| Unigene5265   | Potri.008G031700.2 | 23.0615 | 47.5309  | -1.0434 | Down | 6.68E-20 | 2.96E-19 |
| Unigene18996  | Potri.008G001600.1 | 6.0273  | 12.4226  | -1.0434 | Down | 5.91E-07 | 1.38E-06 |
| Unigene115891 | Potri.005G231400.2 | 5.6814  | 11.7096  | -1.0434 | Down | 4.64E-05 | 9.20E-05 |
| Unigene74621  | Potri.001G369000.1 | 23.8303 | 49.1153  | -1.0434 | Down | 1.54E-12 | 5.01E-12 |
| Unigene34483  | Potri.T048600.1    | 10.9654 | 22.6042  | -1.0436 | Down | 1.16E-11 | 3.63E-11 |
| Unigene88002  | Potri.008G117600.1 | 64.7593 | 133.4987 | -1.0437 | Down | 1.28E-46 | 1.16E-45 |
| Unigene20809  | Potri.008G041900.1 | 4.4634  | 9.2015   | -1.0437 | Down | 2.55E-16 | 9.85E-16 |
| Unigene4323   | Potri.009G004400.1 | 31.3596 | 64.6539  | -1.0438 | Down | 3.37E-30 | 2.06E-29 |
| Unigene69449  | Potri.007G003400.1 | 6.6565  | 13.7248  | -1.0439 | Down | 8.83E-11 | 2.64E-10 |
| Unigene107331 | Potri.006G147800.3 | 10.8169 | 22.3028  | -1.0439 | Down | 4.65E-06 | 1.01E-05 |
| Unigene14287  | Potri.001G004600.2 | 19.9725 | 41.1827  | -1.044  | Down | 1.33E-13 | 4.57E-13 |
| Unigene76915  | Potri.008G122200.6 | 30.4286 | 62.7453  | -1.0441 | Down | 2.07E-16 | 8.01E-16 |
| Unigene672    | Potri.002G234500.2 | 11.2232 | 23.1424  | -1.0441 | Down | 1.84E-28 | 1.07E-27 |
| Unigene17044  | Potri.006G254900.5 | 24.6318 | 50.8002  | -1.0443 | Down | 3.86E-21 | 1.79E-20 |

|               |                    |         |          |         |      |          |          |
|---------------|--------------------|---------|----------|---------|------|----------|----------|
| Unigene93637  | Potri.004G011400.1 | 4.2733  | 8.8131   | -1.0443 | Down | 4.76E-07 | 1.12E-06 |
| Unigene70492  | Potri.004G007500.1 | 19.5823 | 40.3861  | -1.0443 | Down | 6.73E-10 | 1.91E-09 |
| Unigene74810  | Potri.010G029100.4 | 96.6007 | 199.2594 | -1.0445 | Down | 2.17E-46 | 1.96E-45 |
| Unigene11951  | Potri.002G161000.1 | 15.2589 | 31.4737  | -1.0445 | Down | 2.87E-20 | 1.29E-19 |
| Unigene14841  | Potri.001G159600.1 | 12.4687 | 25.7185  | -1.0445 | Down | 7.14E-11 | 2.14E-10 |
| Unigene40185  | Potri.015G142500.1 | 6.0686  | 12.518   | -1.0446 | Down | 4.93E-08 | 1.25E-07 |
| Unigene27447  | Potri.008G183400.1 | 4.1332  | 8.5258   | -1.0446 | Down | 4.93E-08 | 1.25E-07 |
| Unigene102766 | Potri.011G108800.1 | 2.7783  | 5.7316   | -1.0447 | Down | 3.72E-05 | 7.46E-05 |
| Unigene7052   | Potri.T118900.1    | 6.7168  | 13.857   | -1.0448 | Down | 3.72E-05 | 7.45E-05 |
| Unigene29751  | Potri.015G104600.1 | 12.0074 | 24.7717  | -1.0448 | Down | 5.16E-09 | 1.39E-08 |
| Unigene28848  | Potri.009G133600.2 | 3.0918  | 6.3786   | -1.0448 | Down | 3.72E-05 | 7.45E-05 |
| Unigene17768  | Potri.005G176200.1 | 3.6371  | 7.5035   | -1.0448 | Down | 3.72E-05 | 7.45E-05 |
| Unigene93124  | Potri.008G042400.1 | 10.6471 | 21.9669  | -1.0449 | Down | 8.73E-14 | 3.01E-13 |
| Unigene44667  | Potri.005G124300.1 | 46.1543 | 95.2288  | -1.0449 | Down | 2.46E-95 | 4.94E-94 |
| Unigene22069  | Potri.015G062600.1 | 1.9562  | 4.0364   | -1.045  | Down | 3.74E-06 | 8.24E-06 |
| Unigene54419  | Potri.014G079500.2 | 10.0487 | 20.7348  | -1.045  | Down | 3.74E-06 | 8.24E-06 |
| Unigene7839   | Potri.012G081900.1 | 7.4442  | 15.3612  | -1.0451 | Down | 1.10E-16 | 4.29E-16 |
| Unigene2067   | Potri.009G053400.2 | 35.633  | 73.5304  | -1.0451 | Down | 1.87E-37 | 1.38E-36 |
| Unigene21682  | Potri.017G078700.1 | 5.9245  | 12.2264  | -1.0452 | Down | 3.83E-07 | 9.11E-07 |
| Unigene75919  | Potri.007G065200.1 | 13.8828 | 28.6522  | -1.0453 | Down | 3.98E-08 | 1.01E-07 |
| Unigene19429  | Potri.018G050900.2 | 30.8127 | 63.5975  | -1.0454 | Down | 5.59E-32 | 3.59E-31 |
| Unigene18260  | Potri.017G055600.1 | 6.3503  | 13.107   | -1.0454 | Down | 4.16E-09 | 1.13E-08 |
| Unigene49866  | Potri.015G145700.2 | 5.5781  | 11.5125  | -1.0454 | Down | 3.98E-08 | 1.01E-07 |
| Unigene5357   | Potri.012G032200.1 | 13.5486 | 27.9626  | -1.0454 | Down | 7.60E-15 | 2.75E-14 |
| Unigene17381  | Potri.006G182100.1 | 17.0769 | 35.2468  | -1.0454 | Down | 8.87E-17 | 3.49E-16 |
| Unigene7179   | Potri.006G153900.1 | 20.9672 | 43.2764  | -1.0454 | Down | 8.87E-17 | 3.49E-16 |
| Unigene40992  | Potri.002G177600.1 | 8.5385  | 17.6234  | -1.0454 | Down | 4.16E-09 | 1.13E-08 |
| Unigene4246   | Potri.002G127300.2 | 10.9009 | 22.4981  | -1.0454 | Down | 3.98E-08 | 1.01E-07 |
| Unigene22555  | Potri.014G081100.2 | 25.8831 | 53.4238  | -1.0455 | Down | 2.37E-25 | 1.25E-24 |
| Unigene19943  | Potri.010G185300.1 | 8.1952  | 16.9157  | -1.0455 | Down | 4.39E-10 | 1.26E-09 |
| Unigene89838  | Potri.013G124700.1 | 13.3504 | 27.5587  | -1.0456 | Down | 4.97E-12 | 1.58E-11 |
| Unigene22868  | Potri.007G147100.1 | 18.8627 | 38.9397  | -1.0457 | Down | 2.10E-26 | 1.15E-25 |
| Unigene21794  | Potri.006G140800.1 | 5.2517  | 10.8424  | -1.0458 | Down | 8.45E-19 | 3.59E-18 |
| Unigene29704  | Potri.005G163900.1 | 16.2835 | 33.6173  | -1.0458 | Down | 7.78E-18 | 3.19E-17 |
| Unigene81228  | Potri.005G025100.1 | 63.5419 | 131.1975 | -1.046  | Down | 4.36E-36 | 3.11E-35 |
| Unigene47067  | Potri.014G169900.1 | 6.6474  | 13.7266  | -1.0461 | Down | 3.05E-04 | 5.55E-04 |
| Unigene19104  | Potri.014G014900.1 | 13.1095 | 27.0704  | -1.0461 | Down | 3.21E-08 | 8.22E-08 |
| Unigene29397  | Potri.013G040700.3 | 3.4751  | 7.1759   | -1.0461 | Down | 3.01E-06 | 6.67E-06 |
| Unigene38435  | Potri.010G065400.1 | 15.4031 | 31.8065  | -1.0461 | Down | 6.30E-18 | 2.59E-17 |

|              |                    |         |         |         |      |          |          |
|--------------|--------------------|---------|---------|---------|------|----------|----------|
| Unigene20339 | Potri.009G013700.1 | 2.7573  | 5.6936  | -1.0461 | Down | 3.05E-04 | 5.55E-04 |
| Unigene20950 | Potri.008G055400.1 | 3.7403  | 7.7236  | -1.0461 | Down | 3.05E-04 | 5.55E-04 |
| Unigene30328 | Potri.006G109700.4 | 9.9465  | 20.5391 | -1.0461 | Down | 3.01E-06 | 6.67E-06 |
| Unigene50790 | Potri.006G078300.1 | 6.5961  | 13.6207 | -1.0461 | Down | 3.21E-08 | 8.22E-08 |
| Unigene15452 | Potri.005G196100.2 | 6.6147  | 13.659  | -1.0461 | Down | 3.05E-04 | 5.55E-04 |
| Unigene48749 | Potri.005G066100.1 | 2.6175  | 5.405   | -1.0461 | Down | 3.05E-04 | 5.55E-04 |
| Unigene29954 | Potri.004G090500.1 | 5.4364  | 11.2258 | -1.0461 | Down | 3.05E-04 | 5.55E-04 |
| Unigene5799  | Potri.004G021300.1 | 28.1819 | 58.1941 | -1.0461 | Down | 6.30E-18 | 2.59E-17 |
| Unigene35392 | Potri.002G182900.1 | 2.1348  | 4.4082  | -1.0461 | Down | 3.05E-04 | 5.55E-04 |
| Unigene8368  | Potri.001G403900.1 | 5.0671  | 10.4633 | -1.0461 | Down | 3.09E-07 | 7.39E-07 |
| Unigene29431 | Potri.001G206400.1 | 9.1008  | 18.7927 | -1.0461 | Down | 4.02E-12 | 1.28E-11 |
| Unigene42705 | Potri.001G193900.1 | 3.5275  | 7.284   | -1.0461 | Down | 3.55E-10 | 1.02E-09 |
| Unigene87064 | Potri.001G167100.1 | 15.8824 | 32.7963 | -1.0461 | Down | 4.02E-12 | 1.28E-11 |
| Unigene47480 | Potri.001G069500.1 | 2.9017  | 5.992   | -1.0461 | Down | 3.36E-09 | 9.15E-09 |
| Unigene29644 | Potri.001G004800.1 | 14.5833 | 30.1137 | -1.0461 | Down | 4.62E-14 | 1.61E-13 |
| Unigene28853 | Potri.005G178100.2 | 2.0626  | 4.2593  | -1.0462 | Down | 3.05E-04 | 5.55E-04 |
| Unigene42608 | Potri.016G094200.1 | 23.0453 | 47.5931 | -1.0463 | Down | 2.82E-60 | 3.37E-59 |
| Unigene44791 | Potri.001G344100.2 | 23.7361 | 49.0209 | -1.0463 | Down | 1.02E-25 | 5.46E-25 |
| Unigene33820 | Potri.001G129600.2 | 28.1393 | 58.117  | -1.0464 | Down | 3.11E-39 | 2.40E-38 |
| Unigene24049 | Potri.001G104700.1 | 14.0237 | 28.9634 | -1.0464 | Down | 6.56E-21 | 3.01E-20 |
| Unigene13666 | Potri.010G218100.1 | 10.4454 | 21.5744 | -1.0465 | Down | 4.55E-45 | 4.00E-44 |
| Unigene53891 | Potri.006G180100.1 | 44.2764 | 91.4527 | -1.0465 | Down | 3.07E-41 | 2.48E-40 |
| Unigene8077  | Potri.013G111400.1 | 21.1889 | 43.7698 | -1.0466 | Down | 5.31E-21 | 2.44E-20 |
| Unigene8958  | Potri.014G132900.1 | 15.6371 | 32.3027 | -1.0467 | Down | 2.86E-10 | 8.30E-10 |
| Unigene13395 | Potri.004G088000.1 | 25.3869 | 52.4427 | -1.0467 | Down | 3.65E-47 | 3.37E-46 |
| Unigene50939 | Potri.019G030900.2 | 11.9803 | 24.7498 | -1.0468 | Down | 2.71E-09 | 7.43E-09 |
| Unigene8594  | Potri.014G179500.2 | 13.0741 | 27.0111 | -1.0468 | Down | 3.26E-15 | 1.20E-14 |
| Unigene81633 | Potri.003G130100.5 | 12.4332 | 25.687  | -1.0468 | Down | 2.59E-08 | 6.67E-08 |
| Unigene3153  | Potri.010G207900.1 | 5.2063  | 10.7576 | -1.047  | Down | 3.34E-18 | 1.39E-17 |
| Unigene28079 | Potri.007G022100.1 | 23.473  | 48.4994 | -1.047  | Down | 3.63E-19 | 1.57E-18 |
| Unigene51976 | Potri.001G316400.2 | 19.7309 | 40.7676 | -1.047  | Down | 2.81E-13 | 9.49E-13 |
| Unigene39626 | Potri.005G033800.1 | 7.5661  | 15.6355 | -1.0472 | Down | 2.63E-15 | 9.72E-15 |
| Unigene50478 | Potri.001G310900.1 | 11.5339 | 23.835  | -1.0472 | Down | 2.63E-15 | 9.72E-15 |
| Unigene50875 | Potri.017G109300.1 | 7.2816  | 15.0494 | -1.0474 | Down | 2.19E-09 | 6.03E-09 |
| Unigene12489 | Potri.014G180700.1 | 27.1215 | 56.0529 | -1.0474 | Down | 5.89E-38 | 4.40E-37 |
| Unigene34740 | Potri.005G078500.1 | 12.7512 | 26.354  | -1.0474 | Down | 9.31E-49 | 8.86E-48 |
| Unigene17601 | Potri.005G021700.1 | 23.2825 | 48.1199 | -1.0474 | Down | 2.49E-17 | 1.00E-16 |
| Unigene21414 | Potri.009G042600.1 | 9.7871  | 20.23   | -1.0475 | Down | 2.89E-26 | 1.57E-25 |
| Unigene1920  | Potri.006G209100.3 | 30.3343 | 62.6976 | -1.0475 | Down | 8.35E-50 | 8.12E-49 |

|               |                    |          |          |         |      |          |          |
|---------------|--------------------|----------|----------|---------|------|----------|----------|
| Unigene24237  | Potri.008G125700.1 | 15.8126  | 32.6861  | -1.0476 | Down | 2.19E-18 | 9.18E-18 |
| Unigene116202 | Potri.010G160700.6 | 19.1895  | 39.6684  | -1.0477 | Down | 1.98E-14 | 7.03E-14 |
| Unigene49690  | Potri.001G200600.1 | 17.0488  | 35.2436  | -1.0477 | Down | 2.02E-17 | 8.15E-17 |
| Unigene119170 | Potri.018G087600.1 | 4.585    | 9.4789   | -1.0478 | Down | 2.01E-07 | 4.86E-07 |
| Unigene91524  | Potri.012G059200.1 | 3.2473   | 6.7133   | -1.0478 | Down | 2.44E-04 | 4.48E-04 |
| Unigene24835  | Potri.006G182900.1 | 4.7263   | 9.7711   | -1.0478 | Down | 2.44E-04 | 4.48E-04 |
| Unigene41146  | Potri.003G015200.1 | 5.3285   | 11.016   | -1.0478 | Down | 2.44E-04 | 4.48E-04 |
| Unigene100541 | Potri.002G132700.2 | 3.3416   | 6.9084   | -1.0478 | Down | 2.44E-04 | 4.48E-04 |
| Unigene45393  | Potri.002G014500.1 | 8.0206   | 16.583   | -1.0479 | Down | 1.89E-26 | 1.04E-25 |
| Unigene19252  | Potri.015G072000.2 | 22.0245  | 45.5432  | -1.0481 | Down | 1.50E-21 | 7.02E-21 |
| Unigene26232  | Potri.008G182300.1 | 47.3333  | 97.878   | -1.0481 | Down | 1.70E-36 | 1.23E-35 |
| Unigene2021   | Potri.014G177500.2 | 24.7155  | 51.1093  | -1.0482 | Down | 1.45E-23 | 7.23E-23 |
| Unigene59027  | Potri.018G124000.1 | 6.2767   | 12.9805  | -1.0483 | Down | 1.68E-08 | 4.39E-08 |
| Unigene16126  | Potri.015G008000.1 | 13.7873  | 28.5143  | -1.0483 | Down | 1.51E-10 | 4.44E-10 |
| Unigene11779  | Potri.013G044600.1 | 19.5197  | 40.3681  | -1.0483 | Down | 1.36E-38 | 1.03E-37 |
| Unigene37418  | Potri.008G203500.1 | 27.1553  | 56.1584  | -1.0483 | Down | 1.40E-15 | 5.21E-15 |
| Unigene40023  | Potri.002G205800.1 | 6.3296   | 13.0906  | -1.0483 | Down | 1.51E-10 | 4.44E-10 |
| Unigene18849  | Potri.001G212000.3 | 13.3261  | 27.5597  | -1.0483 | Down | 1.27E-33 | 8.52E-33 |
| Unigene43862  | Potri.014G191100.5 | 38.6571  | 79.9525  | -1.0484 | Down | 1.14E-49 | 1.11E-48 |
| Unigene29056  | Potri.001G360100.1 | 9.0811   | 18.7834  | -1.0485 | Down | 9.20E-52 | 9.33E-51 |
| Unigene39031  | Potri.014G140900.1 | 5.3901   | 11.1497  | -1.0486 | Down | 1.93E-05 | 3.97E-05 |
| Unigene16120  | Potri.009G096700.1 | 10.7595  | 22.2564  | -1.0486 | Down | 1.62E-07 | 3.95E-07 |
| Unigene21887  | Potri.008G087600.2 | 13.2183  | 27.3425  | -1.0486 | Down | 9.49E-24 | 4.77E-23 |
| Unigene45630  | Potri.018G061700.1 | 6.7785   | 14.0231  | -1.0488 | Down | 6.92E-32 | 4.43E-31 |
| Unigene117142 | Potri.014G160400.5 | 32.3549  | 66.9367  | -1.0488 | Down | 7.45E-26 | 4.00E-25 |
| Unigene1801   | Potri.016G058600.1 | 6.1983   | 12.8238  | -1.0489 | Down | 1.22E-10 | 3.61E-10 |
| Unigene31144  | Potri.014G108400.1 | 14.534   | 30.0696  | -1.0489 | Down | 1.22E-10 | 3.61E-10 |
| Unigene20978  | Potri.006G049100.2 | 22.6502  | 46.8625  | -1.0489 | Down | 8.66E-18 | 3.55E-17 |
| Unigene53348  | Potri.010G100400.1 | 15.9103  | 32.9201  | -1.049  | Down | 9.72E-14 | 3.35E-13 |
| Unigene89661  | Potri.002G217000.1 | 27.353   | 56.5942  | -1.049  | Down | 7.03E-23 | 3.44E-22 |
| Unigene39791  | Potri.015G078100.3 | 5.5161   | 11.4141  | -1.0491 | Down | 1.57E-06 | 3.56E-06 |
| Unigene34926  | Potri.015G108900.2 | 5.4233   | 11.2233  | -1.0493 | Down | 9.06E-13 | 2.99E-12 |
| Unigene22642  | Potri.008G149900.2 | 8.5642   | 17.7252  | -1.0494 | Down | 1.30E-07 | 3.20E-07 |
| Unigene85978  | Potri.001G033200.1 | 38.3076  | 79.2843  | -1.0494 | Down | 3.96E-26 | 2.15E-25 |
| Unigene3425   | Potri.009G023100.1 | 26.0781  | 53.9776  | -1.0495 | Down | 6.85E-15 | 2.48E-14 |
| Unigene67547  | Potri.007G011100.2 | 3.9052   | 8.0834   | -1.0496 | Down | 8.47E-12 | 2.66E-11 |
| Unigene37961  | Potri.006G032800.3 | 12.295   | 25.4506  | -1.0496 | Down | 1.10E-08 | 2.89E-08 |
| Unigene38186  | Potri.002G237800.2 | 7.1085   | 14.7145  | -1.0496 | Down | 1.10E-08 | 2.89E-08 |
| Unigene77254  | Potri.002G242600.1 | 107.3578 | 222.2417 | -1.0497 | Down | 5.99E-55 | 6.46E-54 |

|               |                     |         |          |         |      |          |          |
|---------------|---------------------|---------|----------|---------|------|----------|----------|
| Unigene37707  | Potri.015G079400.1  | 7.9728  | 16.5059  | -1.0498 | Down | 1.78E-31 | 1.13E-30 |
| Unigene108655 | Potri.007G029300.1  | 9.1018  | 18.8428  | -1.0498 | Down | 1.55E-05 | 3.21E-05 |
| Unigene24327  | Potri.005G116800.1  | 7.775   | 16.096   | -1.0498 | Down | 6.36E-14 | 2.21E-13 |
| Unigene39518  | Potri.002G221100.1  | 4.7676  | 9.8701   | -1.0498 | Down | 9.30E-10 | 2.62E-09 |
| Unigene876    | Potri.016G118300.4  | 4.7873  | 9.9118   | -1.0499 | Down | 7.96E-11 | 2.38E-10 |
| Unigene44302  | Potri.012G056100.2  | 18.1859 | 37.6528  | -1.0499 | Down | 2.38E-25 | 1.26E-24 |
| Unigene41417  | Potri.001G206600.1  | 15.3744 | 31.8313  | -1.0499 | Down | 7.96E-11 | 2.38E-10 |
| Unigene27917  | Potri.017G089600.1  | 9.4168  | 19.4981  | -1.05   | Down | 6.85E-12 | 2.16E-11 |
| Unigene1195   | Potri.014G125300.2  | 1.5883  | 3.2886   | -1.05   | Down | 1.26E-06 | 2.88E-06 |
| Unigene34013  | Potri.014G096500.1  | 38.5028 | 79.7223  | -1.05   | Down | 8.99E-38 | 6.69E-37 |
| Unigene41786  | Potri.014G016900.1  | 21.1956 | 43.8848  | -1.05   | Down | 4.84E-16 | 1.84E-15 |
| Unigene12375  | Potri.004G044200.1  | 3.6953  | 7.6514   | -1.05   | Down | 1.26E-06 | 2.88E-06 |
| Unigene115479 | Potri.001G031400.3  | 23.0228 | 47.668   | -1.05   | Down | 4.84E-16 | 1.84E-15 |
| Unigene46325  | Potri.003G144600.1  | 18.073  | 37.4233  | -1.0501 | Down | 5.92E-13 | 1.97E-12 |
| Unigene32838  | Potri.005G087500.1  | 6.0849  | 12.6004  | -1.0502 | Down | 1.05E-07 | 2.59E-07 |
| Unigene96750  | Potri.009G133600.2  | 4.6121  | 9.5518   | -1.0503 | Down | 7.51E-10 | 2.12E-09 |
| Unigene257    | Potri.007G003400.1  | 8.0281  | 16.626   | -1.0503 | Down | 9.50E-32 | 6.05E-31 |
| Unigene78210  | Potri.002G243400.10 | 14.2849 | 29.5832  | -1.0503 | Down | 8.84E-09 | 2.35E-08 |
| Unigene102439 | Potri.006G273600.1  | 32.3752 | 67.0506  | -1.0504 | Down | 1.38E-26 | 7.60E-26 |
| Unigene32409  | Potri.001G282400.2  | 10.2514 | 21.2348  | -1.0506 | Down | 1.59E-46 | 1.45E-45 |
| Unigene95706  | Potri.019G107700.1  | 2.6839  | 5.5607   | -1.0509 | Down | 1.57E-04 | 2.93E-04 |
| Unigene20475  | Potri.019G104600.2  | 2.3501  | 4.869    | -1.0509 | Down | 1.57E-04 | 2.93E-04 |
| Unigene9627   | Potri.012G018600.2  | 8.8808  | 18.3998  | -1.0509 | Down | 1.02E-06 | 2.34E-06 |
| Unigene45765  | Potri.011G138100.1  | 17.959  | 37.2085  | -1.0509 | Down | 6.06E-10 | 1.73E-09 |
| Unigene45341  | Potri.011G116800.1  | 2.7788  | 5.7572   | -1.0509 | Down | 1.25E-05 | 2.61E-05 |
| Unigene100883 | Potri.010G159200.2  | 4.9818  | 10.3215  | -1.0509 | Down | 5.19E-11 | 1.57E-10 |
| Unigene94436  | Potri.009G041200.1  | 4.9205  | 10.1946  | -1.0509 | Down | 3.87E-13 | 1.30E-12 |
| Unigene615    | Potri.004G101200.2  | 12.1396 | 25.1504  | -1.0509 | Down | 6.41E-74 | 9.56E-73 |
| Unigene25623  | Potri.002G200900.1  | 6.3802  | 13.2188  | -1.0509 | Down | 1.57E-04 | 2.93E-04 |
| Unigene52940  | Potri.002G149800.2  | 20.2039 | 41.8596  | -1.0509 | Down | 2.56E-16 | 9.89E-16 |
| Unigene110308 | Potri.001G132700.3  | 89.8886 | 186.2639 | -1.0511 | Down | 6.96E-45 | 6.09E-44 |
| Unigene21322  | Potri.012G062700.1  | 19.0139 | 39.4007  | -1.0512 | Down | 1.37E-58 | 1.59E-57 |
| Unigene50568  | Potri.008G203500.1  | 17.1085 | 35.4527  | -1.0512 | Down | 1.41E-19 | 6.16E-19 |
| Unigene2224   | Potri.005G001200.1  | 19.0356 | 39.4462  | -1.0512 | Down | 1.41E-19 | 6.16E-19 |
| Unigene40014  | Potri.005G118400.1  | 3.4968  | 7.2469   | -1.0513 | Down | 3.13E-13 | 1.05E-12 |
| Unigene5553   | Potri.001G065800.3  | 22.4139 | 46.4526  | -1.0514 | Down | 3.62E-12 | 1.16E-11 |
| Unigene14785  | Potri.015G078900.2  | 16.3868 | 33.9641  | -1.0515 | Down | 4.90E-10 | 1.40E-09 |
| Unigene42983  | Potri.019G000900.1  | 5.9087  | 12.2474  | -1.0516 | Down | 2.23E-30 | 1.37E-29 |
| Unigene110450 | Potri.005G131200.1  | 13.1548 | 27.2685  | -1.0516 | Down | 6.82E-08 | 1.71E-07 |

|               |                    |         |          |         |      |          |          |
|---------------|--------------------|---------|----------|---------|------|----------|----------|
| Unigene9971   | Potri.017G036300.2 | 10.2671 | 21.2828  | -1.0517 | Down | 6.82E-08 | 1.71E-07 |
| Unigene84675  | Potri.015G094700.1 | 50.7061 | 105.1108 | -1.0517 | Down | 1.43E-32 | 9.34E-32 |
| Unigene29733  | Potri.014G105400.1 | 61.4226 | 127.326  | -1.0517 | Down | 1.14E-50 | 1.13E-49 |
| Unigene11022  | Potri.010G212300.2 | 12.1088 | 25.1012  | -1.0517 | Down | 6.57E-38 | 4.90E-37 |
| Unigene116235 | Potri.010G003200.1 | 34.6695 | 71.8697  | -1.0517 | Down | 4.03E-25 | 2.11E-24 |
| Unigene36069  | Potri.008G192500.1 | 31.231  | 64.7428  | -1.0517 | Down | 1.05E-18 | 4.44E-18 |
| Unigene55422  | Potri.008G053000.2 | 33.3854 | 69.2079  | -1.0517 | Down | 4.03E-25 | 2.11E-24 |
| Unigene75051  | Potri.T033800.1    | 11.241  | 23.3037  | -1.0518 | Down | 8.19E-07 | 1.90E-06 |
| Unigene61550  | Potri.014G007700.2 | 3.537   | 7.3326   | -1.0518 | Down | 8.19E-07 | 1.90E-06 |
| Unigene57989  | Potri.018G004300.1 | 2.6046  | 5.4004   | -1.052  | Down | 1.00E-05 | 2.11E-05 |
| Unigene50413  | Potri.014G047600.5 | 4.1357  | 8.5751   | -1.052  | Down | 1.00E-05 | 2.11E-05 |
| Unigene79130  | Potri.013G120700.2 | 8.237   | 17.0787  | -1.052  | Down | 1.00E-05 | 2.11E-05 |
| Unigene53593  | Potri.001G024500.1 | 17.9716 | 37.2626  | -1.052  | Down | 3.95E-10 | 1.14E-09 |
| Unigene76486  | Potri.015G065300.1 | 48.1923 | 99.9296  | -1.0521 | Down | 2.64E-25 | 1.40E-24 |
| Unigene419    | Potri.002G183800.1 | 3.8815  | 8.0485   | -1.0521 | Down | 2.05E-13 | 6.95E-13 |
| Unigene2922   | Potri.010G196000.1 | 2.5118  | 5.2092   | -1.0523 | Down | 1.26E-04 | 2.38E-04 |
| Unigene4266   | Potri.010G068200.2 | 70.8432 | 146.9272 | -1.0524 | Down | 5.62E-46 | 5.04E-45 |
| Unigene18858  | Potri.008G123700.1 | 4.6096  | 9.56     | -1.0524 | Down | 2.74E-11 | 8.39E-11 |
| Unigene116833 | Potri.004G143900.1 | 16.4656 | 34.1514  | -1.0525 | Down | 1.66E-13 | 5.65E-13 |
| Unigene53797  | Potri.002G205900.5 | 18.842  | 39.0805  | -1.0525 | Down | 1.66E-13 | 5.65E-13 |
| Unigene13694  | Potri.012G134700.1 | 22.1758 | 45.9979  | -1.0526 | Down | 5.68E-44 | 4.87E-43 |
| Unigene107503 | Potri.006G024100.2 | 12.4332 | 25.7905  | -1.0526 | Down | 6.60E-07 | 1.54E-06 |
| Unigene42303  | Potri.012G045800.1 | 15.1782 | 31.4871  | -1.0528 | Down | 3.75E-09 | 1.02E-08 |
| Unigene136    | Potri.006G216900.1 | 3.3554  | 6.9621   | -1.053  | Down | 5.83E-17 | 2.31E-16 |
| Unigene46083  | Potri.004G203400.4 | 4.1106  | 8.5291   | -1.053  | Down | 8.04E-06 | 1.71E-05 |
| Unigene24365  | Potri.010G162000.1 | 6.0449  | 12.5428  | -1.0531 | Down | 1.45E-23 | 7.24E-23 |
| Unigene52961  | Potri.009G142800.1 | 7.9298  | 16.4538  | -1.0531 | Down | 8.04E-06 | 1.71E-05 |
| Unigene48475  | Potri.009G059800.1 | 10.5639 | 21.9192  | -1.0531 | Down | 4.44E-08 | 1.13E-07 |
| Unigene24006  | Potri.010G157700.2 | 7.6341  | 15.8422  | -1.0532 | Down | 1.08E-13 | 3.72E-13 |
| Unigene9268   | Potri.005G185200.1 | 26.5778 | 55.153   | -1.0532 | Down | 6.66E-16 | 2.52E-15 |
| Unigene689    | Potri.007G107400.1 | 3.1667  | 6.5716   | -1.0533 | Down | 1.08E-13 | 3.72E-13 |
| Unigene4336   | Potri.010G138800.2 | 17.0782 | 35.4443  | -1.0534 | Down | 7.62E-15 | 2.76E-14 |
| Unigene14542  | Potri.017G050900.5 | 26.3029 | 54.5942  | -1.0535 | Down | 5.38E-16 | 2.05E-15 |
| Unigene11915  | Potri.010G194400.2 | 9.4857  | 19.6884  | -1.0535 | Down | 5.38E-16 | 2.05E-15 |
| Unigene18457  | Potri.008G226100.1 | 9.0192  | 18.7202  | -1.0535 | Down | 5.38E-16 | 2.05E-15 |
| Unigene10461  | Potri.001G101600.3 | 11.0758 | 22.988   | -1.0535 | Down | 1.25E-12 | 4.08E-12 |
| Unigene21104  | Potri.015G052800.1 | 12.0642 | 25.0412  | -1.0536 | Down | 2.08E-10 | 6.08E-10 |
| Unigene17680  | Potri.001G377500.1 | 11.0136 | 22.8613  | -1.0536 | Down | 8.75E-14 | 3.02E-13 |
| Unigene7061   | Potri.004G087400.2 | 5.0662  | 10.517   | -1.0537 | Down | 5.53E-25 | 2.89E-24 |

|               |                    |          |          |         |      |           |           |
|---------------|--------------------|----------|----------|---------|------|-----------|-----------|
| Unigene88869  | Potri.008G035600.2 | 38.8264  | 80.6054  | -1.0538 | Down | 1.32E-30  | 8.14E-30  |
| Unigene13298  | Potri.018G143100.3 | 28.4428  | 59.051   | -1.0539 | Down | 2.42E-47  | 2.23E-46  |
| Unigene28935  | Potri.013G032400.1 | 9.0283   | 18.7436  | -1.0539 | Down | 6.24E-24  | 3.16E-23  |
| Unigene41942  | Potri.011G123500.1 | 24.9735  | 51.8482  | -1.0539 | Down | 1.38E-20  | 6.25E-20  |
| Unigene66369  | Potri.002G137000.3 | 7.1188   | 14.7798  | -1.0539 | Down | 2.44E-09  | 6.71E-09  |
| Unigene78858  | Potri.008G182500.1 | 27.9356  | 58.0079  | -1.0541 | Down | 3.53E-16  | 1.35E-15  |
| Unigene21700  | Potri.004G027800.1 | 7.9365   | 16.4799  | -1.0541 | Down | 2.91E-35  | 2.03E-34  |
| Unigene104890 | Potri.002G066000.2 | 12.6245  | 26.2131  | -1.0541 | Down | 1.68E-10  | 4.94E-10  |
| Unigene108591 | Potri.001G322300.1 | 9.8629   | 20.479   | -1.0541 | Down | 6.47E-06  | 1.39E-05  |
| Unigene77505  | Potri.014G134100.2 | 82.3497  | 171.0046 | -1.0542 | Down | 3.76E-43  | 3.17E-42  |
| Unigene52011  | Potri.003G201100.1 | 20.3356  | 42.2285  | -1.0542 | Down | 2.50E-17  | 1.00E-16  |
| Unigene73810  | Potri.017G036000.1 | 26.6175  | 55.2782  | -1.0543 | Down | 5.72E-14  | 1.99E-13  |
| Unigene27095  | Potri.016G072700.2 | 13.6985  | 28.4497  | -1.0544 | Down | 2.88E-08  | 7.42E-08  |
| Unigene45129  | Potri.008G158600.1 | 7.0682   | 14.6795  | -1.0544 | Down | 4.03E-15  | 1.48E-14  |
| Unigene53209  | Potri.004G203400.1 | 14.4146  | 29.9388  | -1.0545 | Down | 1.97E-09  | 5.44E-09  |
| Unigene39408  | Potri.010G215000.1 | 5.1011   | 10.5959  | -1.0546 | Down | 9.44E-12  | 2.96E-11  |
| Unigene28729  | Potri.010G037200.1 | 21.5352  | 44.7345  | -1.0547 | Down | 4.76E-39  | 3.65E-38  |
| Unigene53827  | Potri.009G025700.1 | 19.7747  | 41.0782  | -1.0547 | Down | 3.26E-15  | 1.20E-14  |
| Unigene80710  | Potri.002G140200.1 | 24.9161  | 51.7585  | -1.0547 | Down | 3.26E-15  | 1.20E-14  |
| Unigene32171  | Potri.006G024200.1 | 19.6009  | 40.7198  | -1.0548 | Down | 1.52E-59  | 1.79E-58  |
| Unigene15966  | Potri.T035400.1    | 212.1131 | 440.7058 | -1.055  | Down | 4.71E-155 | 1.76E-153 |
| Unigene16505  | Potri.018G128100.3 | 15.5879  | 32.3881  | -1.055  | Down | 2.33E-08  | 6.01E-08  |
| Unigene17752  | Potri.008G105700.1 | 11.9586  | 24.8473  | -1.055  | Down | 7.63E-12  | 2.40E-11  |
| Unigene112819 | Potri.007G099900.4 | 14.799   | 30.749   | -1.055  | Down | 1.59E-09  | 4.41E-09  |
| Unigene10539  | Potri.004G201900.1 | 13.505   | 28.0604  | -1.055  | Down | 2.33E-08  | 6.01E-08  |
| Unigene81850  | Potri.001G026300.1 | 12.1913  | 25.3308  | -1.055  | Down | 2.33E-08  | 6.01E-08  |
| Unigene51375  | Potri.001G023500.1 | 4.1118   | 8.5433   | -1.055  | Down | 8.07E-05  | 1.56E-04  |
| Unigene34614  | Potri.016G141200.1 | 14.1077  | 29.3158  | -1.0552 | Down | 3.82E-29  | 2.26E-28  |
| Unigene44718  | Potri.013G158100.1 | 46.9154  | 97.4914  | -1.0552 | Down | 3.79E-77  | 5.97E-76  |
| Unigene1677   | Potri.010G180300.5 | 23.4066  | 48.6452  | -1.0554 | Down | 1.35E-39  | 1.05E-38  |
| Unigene34340  | Potri.015G048100.2 | 10.2801  | 21.3668  | -1.0555 | Down | 4.40E-20  | 1.96E-19  |
| Unigene15435  | Potri.007G093400.2 | 18.2461  | 37.9237  | -1.0555 | Down | 8.86E-11  | 2.65E-10  |
| Unigene10463  | Potri.002G179500.2 | 55.0241  | 114.3652 | -1.0555 | Down | 9.40E-48  | 8.78E-47  |
| Unigene115165 | Potri.002G032600.2 | 16.6797  | 34.6668  | -1.0555 | Down | 6.16E-12  | 1.95E-11  |
| Unigene12952  | Potri.006G222900.1 | 33.3493  | 69.3215  | -1.0556 | Down | 1.69E-37  | 1.25E-36  |
| Unigene94803  | Potri.015G090900.3 | 70.4927  | 146.547  | -1.0558 | Down | 2.62E-35  | 1.83E-34  |
| Unigene66717  | Potri.001G317200.1 | 2.3271   | 4.8378   | -1.0558 | Down | 2.78E-07  | 6.68E-07  |
| Unigene51350  | Potri.011G164000.3 | 18.3919  | 38.2408  | -1.056  | Down | 4.05E-19  | 1.74E-18  |
| Unigene18889  | Potri.010G039600.2 | 3.1404   | 6.5294   | -1.056  | Down | 4.18E-06  | 9.13E-06  |



|               |                    |         |         |         |      |          |          |
|---------------|--------------------|---------|---------|---------|------|----------|----------|
| Unigene42991  | Potri.008G081200.2 | 2.7292  | 5.6744  | -1.056  | Down | 4.18E-06 | 9.13E-06 |
| Unigene22757  | Potri.010G244500.1 | 5.7829  | 12.0244 | -1.0561 | Down | 1.04E-09 | 2.91E-09 |
| Unigene28499  | Potri.018G109200.1 | 1.7801  | 3.7019  | -1.0563 | Down | 6.47E-05 | 1.27E-04 |
| Unigene29465  | Potri.018G040800.1 | 3.2467  | 6.7518  | -1.0563 | Down | 6.47E-05 | 1.27E-04 |
| Unigene14645  | Potri.005G146800.1 | 33.0017 | 68.6291 | -1.0563 | Down | 3.27E-19 | 1.42E-18 |
| Unigene53882  | Potri.003G188400.1 | 8.3318  | 17.3266 | -1.0563 | Down | 1.51E-08 | 3.96E-08 |
| Unigene643    | Potri.003G126600.5 | 2.8337  | 5.8929  | -1.0563 | Down | 1.51E-08 | 3.96E-08 |
| Unigene23857  | Potri.010G011700.1 | 15.0964 | 31.3961 | -1.0564 | Down | 5.12E-31 | 3.19E-30 |
| Unigene69711  | Potri.009G130000.1 | 5.0405  | 10.4831 | -1.0564 | Down | 5.78E-11 | 1.74E-10 |
| Unigene84685  | Potri.007G090600.1 | 47.6532 | 99.1044 | -1.0564 | Down | 5.12E-31 | 3.19E-30 |
| Unigene705    | Potri.006G122300.2 | 8.3763  | 17.4199 | -1.0564 | Down | 4.03E-25 | 2.12E-24 |
| Unigene29736  | Potri.015G086200.1 | 7.1615  | 14.8953 | -1.0565 | Down | 2.24E-07 | 5.40E-07 |
| Unigene1606   | Potri.014G169200.5 | 26.3805 | 54.8665 | -1.0565 | Down | 2.35E-26 | 1.28E-25 |
| Unigene18602  | Potri.006G263400.1 | 5.9547  | 12.3852 | -1.0565 | Down | 2.24E-07 | 5.41E-07 |
| Unigene2623   | Potri.002G237800.2 | 33.6234 | 69.9377 | -1.0566 | Down | 2.42E-32 | 1.57E-31 |
| Unigene49783  | Potri.T134200.5    | 20.0926 | 41.7972 | -1.0567 | Down | 5.24E-17 | 2.08E-16 |
| Unigene114604 | Potri.016G024300.3 | 11.8867 | 24.7294 | -1.0569 | Down | 1.22E-08 | 3.21E-08 |
| Unigene39001  | Potri.002G199500.1 | 3.6237  | 7.5389  | -1.0569 | Down | 3.36E-06 | 7.42E-06 |
| Unigene22814  | Potri.002G027100.1 | 4.4977  | 9.3571  | -1.0569 | Down | 3.36E-06 | 7.42E-06 |
| Unigene51107  | Potri.001G443200.3 | 20.1057 | 41.8285 | -1.0569 | Down | 1.84E-13 | 6.27E-13 |
| Unigene62168  | Potri.007G011400.1 | 5.079   | 10.5674 | -1.057  | Down | 4.24E-17 | 1.69E-16 |
| Unigene41159  | Potri.006G195200.7 | 31.596  | 65.7399 | -1.057  | Down | 3.06E-30 | 1.87E-29 |
| Unigene26288  | Potri.004G074400.4 | 20.4381 | 42.5248 | -1.057  | Down | 1.05E-14 | 3.77E-14 |
| Unigene22802  | Potri.010G092900.1 | 40.4681 | 84.2033 | -1.0571 | Down | 3.15E-61 | 3.82E-60 |
| Unigene644    | Potri.007G009600.1 | 9.1933  | 19.1286 | -1.0571 | Down | 4.16E-23 | 2.05E-22 |
| Unigene46048  | Potri.013G117100.2 | 10.1222 | 21.0636 | -1.0572 | Down | 1.80E-07 | 4.39E-07 |
| Unigene103901 | Potri.009G129400.2 | 6.347   | 13.2077 | -1.0572 | Down | 1.80E-07 | 4.39E-07 |
| Unigene43219  | Potri.002G034100.1 | 8.1158  | 16.8886 | -1.0572 | Down | 1.49E-13 | 5.10E-13 |
| Unigene26230  | Potri.011G155800.1 | 21.4978 | 44.7382 | -1.0573 | Down | 3.77E-11 | 1.15E-10 |
| Unigene25266  | Potri.006G117400.1 | 13.1232 | 27.3091 | -1.0573 | Down | 3.44E-29 | 2.04E-28 |
| Unigene28749  | Potri.012G014600.1 | 7.4957  | 15.6    | -1.0574 | Down | 1.14E-25 | 6.08E-25 |
| Unigene90957  | Potri.003G220300.1 | 23.219  | 48.3227 | -1.0574 | Down | 4.70E-22 | 2.24E-21 |
| Unigene45495  | Potri.016G001700.3 | 18.5315 | 38.571  | -1.0575 | Down | 6.58E-21 | 3.02E-20 |
| Unigene45831  | Potri.009G141300.4 | 10.8976 | 22.6809 | -1.0575 | Down | 1.14E-19 | 5.01E-19 |
| Unigene43026  | Potri.006G120700.2 | 5.9356  | 12.3535 | -1.0575 | Down | 4.84E-16 | 1.85E-15 |
| Unigene47009  | Potri.003G119200.1 | 6.3366  | 13.1882 | -1.0575 | Down | 5.19E-05 | 1.03E-04 |
| Unigene1043   | Potri.001G296300.1 | 2.1594  | 4.4944  | -1.0575 | Down | 5.19E-05 | 1.03E-04 |
| Unigene21173  | Potri.019G020900.6 | 14.8909 | 30.9956 | -1.0576 | Down | 5.45E-10 | 1.56E-09 |
| Unigene18732  | Potri.004G159800.1 | 3.4863  | 7.2567  | -1.0576 | Down | 5.45E-10 | 1.56E-09 |

|               |                    |         |         |         |      |          |          |
|---------------|--------------------|---------|---------|---------|------|----------|----------|
| Unigene1975   | Potri.002G162000.1 | 2.4818  | 5.1659  | -1.0576 | Down | 5.45E-10 | 1.56E-09 |
| Unigene47604  | Potri.016G068800.1 | 10.0487 | 20.9183 | -1.0578 | Down | 2.71E-06 | 6.01E-06 |
| Unigene2872   | Potri.010G014100.2 | 3.5552  | 7.4008  | -1.0578 | Down | 3.92E-16 | 1.50E-15 |
| Unigene7207   | Potri.017G106800.2 | 16.1413 | 33.6052 | -1.0579 | Down | 9.74E-14 | 3.36E-13 |
| Unigene38652  | Potri.017G030100.1 | 6.3018  | 13.1198 | -1.0579 | Down | 1.45E-07 | 3.57E-07 |
| Unigene77984  | Potri.001G182900.2 | 89.7421 | 186.844 | -1.058  | Down | 7.62E-48 | 7.12E-47 |
| Unigene78785  | Potri.004G161800.3 | 30.1206 | 62.7158 | -1.0581 | Down | 1.82E-17 | 7.36E-17 |
| Unigene33302  | Potri.006G100900.1 | 25.3136 | 52.713  | -1.0582 | Down | 6.82E-25 | 3.56E-24 |
| Unigene4774   | Potri.005G100500.1 | 14.3646 | 29.9113 | -1.0582 | Down | 2.46E-11 | 7.57E-11 |
| Unigene24045  | Potri.001G010600.1 | 9.6842  | 20.1663 | -1.0582 | Down | 6.82E-25 | 3.56E-24 |
| Unigene42473  | Potri.001G253600.1 | 18.702  | 38.947  | -1.0583 | Down | 2.57E-16 | 9.90E-16 |
| Unigene2169   | Potri.018G063700.1 | 46.7471 | 97.3566 | -1.0584 | Down | 3.47E-64 | 4.44E-63 |
| Unigene42726  | Potri.005G164000.1 | 24.353  | 50.7185 | -1.0584 | Down | 4.20E-91 | 7.98E-90 |
| Unigene42860  | Potri.008G186100.2 | 6.8934  | 14.3571 | -1.0585 | Down | 7.48E-35 | 5.16E-34 |
| Unigene35508  | Potri.017G054300.2 | 5.3412  | 11.1253 | -1.0586 | Down | 2.18E-06 | 4.87E-06 |
| Unigene108302 | Potri.016G116400.1 | 16.2959 | 33.9428 | -1.0586 | Down | 6.41E-09 | 1.71E-08 |
| Unigene15927  | Potri.015G034100.1 | 1.5599  | 3.2492  | -1.0586 | Down | 4.17E-05 | 8.31E-05 |
| Unigene40996  | Potri.011G050900.4 | 6.029   | 12.5579 | -1.0586 | Down | 1.17E-07 | 2.89E-07 |
| Unigene36215  | Potri.010G073600.3 | 10.9347 | 22.776  | -1.0586 | Down | 6.41E-09 | 1.71E-08 |
| Unigene22279  | Potri.009G080500.4 | 9.7337  | 20.2744 | -1.0586 | Down | 1.77E-32 | 1.15E-31 |
| Unigene17249  | Potri.008G117200.2 | 12.1336 | 25.2731 | -1.0586 | Down | 1.12E-12 | 3.68E-12 |
| Unigene4980   | Potri.007G072300.1 | 1.6375  | 3.4108  | -1.0586 | Down | 4.17E-05 | 8.31E-05 |
| Unigene53648  | Potri.006G126700.2 | 12.0063 | 25.008  | -1.0586 | Down | 1.17E-07 | 2.89E-07 |
| Unigene3658   | Potri.004G099800.2 | 18.6498 | 38.8457 | -1.0586 | Down | 1.12E-12 | 3.68E-12 |
| Unigene33525  | Potri.002G088800.1 | 12.8324 | 26.7287 | -1.0586 | Down | 6.37E-14 | 2.21E-13 |
| Unigene31796  | Potri.001G219500.1 | 10.4142 | 21.6918 | -1.0586 | Down | 2.09E-37 | 1.54E-36 |
| Unigene53126  | Potri.001G124500.2 | 12.3236 | 25.669  | -1.0586 | Down | 1.17E-07 | 2.89E-07 |
| Unigene20230  | Potri.002G192500.1 | 14.4407 | 30.0836 | -1.0588 | Down | 5.55E-19 | 2.38E-18 |
| Unigene46814  | Potri.006G045400.1 | 20.8159 | 43.3727 | -1.0591 | Down | 7.81E-18 | 3.20E-17 |
| Unigene11670  | Potri.013G129400.1 | 6.7691  | 14.1053 | -1.0592 | Down | 1.22E-21 | 5.71E-21 |
| Unigene17129  | Potri.008G042300.6 | 17.5923 | 36.6638 | -1.0594 | Down | 1.10E-16 | 4.31E-16 |
| Unigene9284   | Potri.004G133700.5 | 8.792   | 18.3225 | -1.0594 | Down | 6.32E-18 | 2.60E-17 |
| Unigene17968  | Potri.008G021900.1 | 20.0202 | 41.7259 | -1.0595 | Down | 1.92E-15 | 7.13E-15 |
| Unigene38419  | Potri.006G024100.1 | 15.5937 | 32.5027 | -1.0596 | Down | 5.11E-18 | 2.11E-17 |
| Unigene29210  | Potri.014G087200.1 | 12.8523 | 26.7901 | -1.0597 | Down | 8.90E-17 | 3.50E-16 |
| Unigene16359  | Potri.012G138700.1 | 5.4643  | 11.3901 | -1.0597 | Down | 3.34E-05 | 6.73E-05 |
| Unigene97823  | Potri.010G204000.1 | 3.3842  | 7.0542  | -1.0597 | Down | 3.34E-05 | 6.73E-05 |
| Unigene29136  | Potri.008G011600.1 | 3.5671  | 7.4355  | -1.0597 | Down | 3.34E-05 | 6.73E-05 |
| Unigene50344  | Potri.006G217000.1 | 6.4503  | 13.4454 | -1.0597 | Down | 8.90E-17 | 3.50E-16 |

|               |                    |         |          |         |      |          |          |
|---------------|--------------------|---------|----------|---------|------|----------|----------|
| Unigene8375   | Potri.001G258600.2 | 6.6417  | 13.8445  | -1.0597 | Down | 5.93E-13 | 1.97E-12 |
| Unigene39524  | Potri.009G058000.1 | 9.851   | 20.5362  | -1.0598 | Down | 2.82E-28 | 1.63E-27 |
| Unigene27442  | Potri.016G082900.2 | 57.4752 | 119.825  | -1.0599 | Down | 1.69E-57 | 1.92E-56 |
| Unigene47171  | Potri.018G023800.1 | 5.0418  | 10.5121  | -1.06   | Down | 3.91E-27 | 2.18E-26 |
| Unigene48938  | Potri.008G044300.1 | 10.7423 | 22.3966  | -1.06   | Down | 1.87E-10 | 5.48E-10 |
| Unigene14281  | Potri.006G121500.1 | 18.0649 | 37.6649  | -1.06   | Down | 4.79E-13 | 1.60E-12 |
| Unigene35237  | Potri.013G095100.5 | 14.8152 | 30.89    | -1.0601 | Down | 1.26E-15 | 4.70E-15 |
| Unigene32886  | Potri.013G070500.1 | 16.3765 | 34.1455  | -1.0601 | Down | 2.99E-32 | 1.93E-31 |
| Unigene115707 | Potri.008G205900.1 | 7.8127  | 16.2913  | -1.0602 | Down | 1.41E-06 | 3.21E-06 |
| Unigene20886  | Potri.009G023100.1 | 22.2238 | 46.346   | -1.0603 | Down | 1.02E-15 | 3.82E-15 |
| Unigene23479  | Potri.001G380400.2 | 16.5713 | 34.5569  | -1.0603 | Down | 5.44E-26 | 2.93E-25 |
| Unigene28522  | Potri.013G038700.1 | 4.3718  | 9.1193   | -1.0607 | Down | 2.68E-05 | 5.46E-05 |
| Unigene27912  | Potri.006G062300.6 | 7.5891  | 15.8305  | -1.0607 | Down | 2.72E-09 | 7.45E-09 |
| Unigene99554  | Potri.013G020400.2 | 2.0223  | 4.2191   | -1.0609 | Down | 1.14E-06 | 2.60E-06 |
| Unigene7464   | Potri.010G093200.1 | 12.2677 | 25.5932  | -1.0609 | Down | 6.65E-16 | 2.52E-15 |
| Unigene79416  | Potri.001G029900.1 | 87.2378 | 181.9958 | -1.0609 | Down | 2.16E-48 | 2.04E-47 |
| Unigene43200  | Potri.011G156200.1 | 12.1855 | 25.4239  | -1.061  | Down | 1.54E-35 | 1.09E-34 |
| Unigene23224  | Potri.009G102900.1 | 6.8643  | 14.3211  | -1.061  | Down | 3.09E-17 | 1.24E-16 |
| Unigene35151  | Potri.001G286600.5 | 10.5612 | 22.0341  | -1.061  | Down | 5.54E-12 | 1.76E-11 |
| Unigene53191  | Potri.009G163400.2 | 14.346  | 29.9355  | -1.0612 | Down | 2.19E-09 | 6.04E-09 |
| Unigene42893  | Potri.001G407300.2 | 6.8383  | 14.2695  | -1.0612 | Down | 2.14E-34 | 1.46E-33 |
| Unigene44473  | Potri.004G166600.1 | 21.7881 | 45.4707  | -1.0614 | Down | 1.24E-26 | 6.85E-26 |
| Unigene38157  | Potri.014G128300.1 | 22.7758 | 47.5347  | -1.0615 | Down | 9.41E-19 | 4.00E-18 |
| Unigene91410  | Potri.004G161500.1 | 52.4858 | 109.5525 | -1.0616 | Down | 1.56E-50 | 1.54E-49 |
| Unigene27124  | Potri.018G047800.1 | 8.8196  | 18.41    | -1.0617 | Down | 2.16E-05 | 4.42E-05 |
| Unigene38450  | Potri.014G048600.1 | 4.1444  | 8.651    | -1.0617 | Down | 2.16E-05 | 4.42E-05 |
| Unigene17285  | Potri.010G178600.4 | 2.9741  | 6.208    | -1.0617 | Down | 2.16E-05 | 4.42E-05 |
| Unigene52959  | Potri.006G263900.1 | 2.4559  | 5.1265   | -1.0617 | Down | 5.34E-04 | 9.45E-04 |
| Unigene106918 | Potri.005G209900.2 | 2.4186  | 5.0486   | -1.0617 | Down | 9.14E-07 | 2.11E-06 |
| Unigene75727  | Potri.005G147800.1 | 5.3765  | 11.2229  | -1.0617 | Down | 5.34E-04 | 9.45E-04 |
| Unigene16101  | Potri.005G051300.1 | 25.0988 | 52.391   | -1.0617 | Down | 1.66E-13 | 5.65E-13 |
| Unigene32062  | Potri.004G011400.1 | 9.6025  | 20.0441  | -1.0617 | Down | 3.86E-28 | 2.22E-27 |
| Unigene15253  | Potri.002G188700.4 | 8.9074  | 18.5932  | -1.0617 | Down | 2.16E-05 | 4.42E-05 |
| Unigene53107  | Potri.002G065500.1 | 21.4096 | 44.6903  | -1.0617 | Down | 3.62E-12 | 1.16E-11 |
| Unigene107890 | Potri.001G289200.1 | 17.6392 | 36.8199  | -1.0617 | Down | 1.77E-09 | 4.90E-09 |
| Unigene30656  | Potri.001G124500.2 | 24.9704 | 52.1231  | -1.0617 | Down | 7.62E-15 | 2.76E-14 |
| Unigene31876  | Potri.012G112000.1 | 6.9697  | 14.5503  | -1.0619 | Down | 7.63E-47 | 6.98E-46 |
| Unigene22513  | Potri.011G082000.2 | 32.0543 | 66.923   | -1.062  | Down | 2.86E-56 | 3.17E-55 |
| Unigene52382  | Potri.019G065700.1 | 39.0757 | 81.5881  | -1.0621 | Down | 9.69E-42 | 7.91E-41 |

|               |                     |         |          |         |      |          |          |
|---------------|---------------------|---------|----------|---------|------|----------|----------|
| Unigene25055  | Potri.004G101100.4  | 12.4332 | 25.9604  | -1.0621 | Down | 6.43E-11 | 1.93E-10 |
| Unigene14946  | Potri.002G167100.1  | 5.7548  | 12.0173  | -1.0623 | Down | 3.21E-08 | 8.24E-08 |
| Unigene29439  | Potri.010G064600.1  | 2.3981  | 5.0082   | -1.0624 | Down | 7.36E-07 | 1.71E-06 |
| Unigene37212  | Potri.007G139300.2  | 20.1201 | 42.0194  | -1.0624 | Down | 2.36E-12 | 7.63E-12 |
| Unigene102867 | Potri.003G191000.1  | 2.4052  | 5.0232   | -1.0624 | Down | 7.36E-07 | 1.71E-06 |
| Unigene53322  | Potri.001G051400.3  | 11.1444 | 23.278   | -1.0626 | Down | 1.15E-09 | 3.23E-09 |
| Unigene28383  | Potri.016G071800.1  | 2.6957  | 5.6307   | -1.0627 | Down | 1.73E-05 | 3.57E-05 |
| Unigene102939 | Potri.015G072100.1  | 5.4885  | 11.4642  | -1.0627 | Down | 1.73E-05 | 3.57E-05 |
| Unigene116857 | Potri.009G150300.1  | 20.0415 | 41.8646  | -1.0627 | Down | 1.51E-16 | 5.88E-16 |
| Unigene45517  | Potri.003G149800.1  | 2.7776  | 5.8018   | -1.0627 | Down | 1.15E-09 | 3.23E-09 |
| Unigene12177  | Potri.009G071900.1  | 9.3107  | 19.4504  | -1.0628 | Down | 3.26E-15 | 1.20E-14 |
| Unigene94366  | Potri.002G235700.1  | 18.8682 | 39.4149  | -1.0628 | Down | 4.67E-41 | 3.76E-40 |
| Unigene18156  | Potri.012G015900.1  | 4.6879  | 9.7938   | -1.0629 | Down | 4.20E-11 | 1.27E-10 |
| Unigene48898  | Potri.014G169100.2  | 26.8385 | 56.0745  | -1.063  | Down | 1.23E-27 | 6.96E-27 |
| Unigene3927   | Potri.019G068400.1  | 18.2805 | 38.1958  | -1.0631 | Down | 4.59E-18 | 1.90E-17 |
| Unigene11403  | Potri.011G022300.2  | 2.9949  | 6.2576   | -1.0631 | Down | 9.31E-10 | 2.62E-09 |
| Unigene414    | Potri.006G222000.1  | 11.6435 | 24.3283  | -1.0631 | Down | 5.23E-40 | 4.10E-39 |
| Unigene84498  | Potri.006G047000.4  | 44.2514 | 92.4692  | -1.0632 | Down | 3.81E-29 | 2.25E-28 |
| Unigene7110   | Potri.006G109500.6  | 31.3991 | 65.6131  | -1.0633 | Down | 2.10E-26 | 1.15E-25 |
| Unigene75553  | Potri.005G001200.1  | 14.0084 | 29.2752  | -1.0634 | Down | 2.09E-08 | 5.42E-08 |
| Unigene6936   | Potri.001G094400.1  | 8.4127  | 17.581   | -1.0634 | Down | 2.09E-08 | 5.42E-08 |
| Unigene12206  | Potri.003G169200.2  | 8.7032  | 18.1891  | -1.0635 | Down | 1.25E-12 | 4.08E-12 |
| Unigene19811  | Potri.003G130300.1  | 66.7385 | 139.4858 | -1.0635 | Down | 1.23E-37 | 9.11E-37 |
| Unigene21462  | Potri.019G020700.1  | 45.1568 | 94.3817  | -1.0636 | Down | 1.31E-84 | 2.29E-83 |
| Unigene7519   | Potri.005G028800.1  | 9.9176  | 20.7311  | -1.0637 | Down | 1.63E-22 | 7.89E-22 |
| Unigene4598   | Potri.001G200500.4  | 11.9236 | 24.9236  | -1.0637 | Down | 2.74E-11 | 8.39E-11 |
| Unigene32772  | Potri.003G183300.1  | 8.6324  | 18.0452  | -1.0638 | Down | 1.01E-12 | 3.31E-12 |
| Unigene66033  | Potri.003G098100.1  | 3.35    | 7.0028   | -1.0638 | Down | 4.77E-07 | 1.13E-06 |
| Unigene38493  | Potri.002G247100.2  | 5.1316  | 10.7271  | -1.0638 | Down | 4.77E-07 | 1.13E-06 |
| Unigene32109  | Potri.015G086200.1  | 10.8762 | 22.7373  | -1.0639 | Down | 3.47E-28 | 2.00E-27 |
| Unigene2286   | Potri.011G129300.1  | 11.9217 | 24.925   | -1.064  | Down | 6.07E-10 | 1.73E-09 |
| Unigene17924  | Potri.002G254700.11 | 10.8254 | 22.633   | -1.064  | Down | 6.07E-10 | 1.73E-09 |
| Unigene94627  | Potri.002G181300.1  | 6.6606  | 13.9252  | -1.064  | Down | 5.23E-17 | 2.08E-16 |
| Unigene33922  | Potri.019G052100.1  | 16.6239 | 34.7592  | -1.0641 | Down | 3.48E-38 | 2.61E-37 |
| Unigene50329  | Potri.001G452800.3  | 6.0625  | 12.6755  | -1.0641 | Down | 2.21E-11 | 6.81E-11 |
| Unigene20777  | Potri.001G357000.2  | 33.0145 | 69.0388  | -1.0643 | Down | 7.06E-30 | 4.27E-29 |
| Unigene64367  | Potri.012G144800.2  | 5.7961  | 12.1217  | -1.0644 | Down | 1.36E-08 | 3.57E-08 |
| Unigene37424  | Potri.007G135500.2  | 4.8683  | 10.1813  | -1.0644 | Down | 3.84E-07 | 9.12E-07 |
| Unigene39063  | Potri.006G068600.1  | 6.4484  | 13.4859  | -1.0644 | Down | 4.90E-10 | 1.40E-09 |

|               |                    |         |          |         |      |          |          |
|---------------|--------------------|---------|----------|---------|------|----------|----------|
| Unigene50671  | Potri.005G150300.1 | 8.0265  | 16.7862  | -1.0644 | Down | 1.79E-11 | 5.52E-11 |
| Unigene26861  | Potri.005G074400.3 | 9.2433  | 19.3311  | -1.0644 | Down | 1.36E-08 | 3.57E-08 |
| Unigene43617  | Potri.005G063900.1 | 16.6866 | 34.8977  | -1.0644 | Down | 1.49E-28 | 8.69E-28 |
| Unigene48632  | Potri.003G081000.2 | 20.2762 | 42.4047  | -1.0644 | Down | 3.43E-17 | 1.37E-16 |
| Unigene38694  | Potri.003G003300.1 | 6.4703  | 13.5318  | -1.0644 | Down | 1.12E-05 | 2.35E-05 |
| Unigene48088  | Potri.001G453200.1 | 10.657  | 22.2876  | -1.0644 | Down | 3.84E-07 | 9.12E-07 |
| Unigene52768  | Potri.001G294900.2 | 5.8307  | 12.1941  | -1.0644 | Down | 3.84E-07 | 9.12E-07 |
| Unigene25787  | Potri.001G084700.3 | 22.3048 | 46.6471  | -1.0644 | Down | 1.85E-21 | 8.63E-21 |
| Unigene34015  | Potri.001G046400.1 | 11.5757 | 24.2089  | -1.0644 | Down | 2.45E-14 | 8.65E-14 |
| Unigene106936 | Potri.010G114700.1 | 1.4411  | 3.0139   | -1.0645 | Down | 3.42E-04 | 6.18E-04 |
| Unigene43414  | Potri.008G165000.1 | 15.3114 | 32.0237  | -1.0645 | Down | 2.24E-41 | 1.81E-40 |
| Unigene107138 | Potri.001G276800.1 | 2.0323  | 4.2504   | -1.0645 | Down | 3.42E-04 | 6.18E-04 |
| Unigene72983  | Potri.018G069900.5 | 60.8572 | 127.2852 | -1.0646 | Down | 4.64E-30 | 2.82E-29 |
| Unigene50575  | Potri.001G121100.1 | 13.1731 | 27.5526  | -1.0646 | Down | 2.17E-24 | 1.11E-23 |
| Unigene45646  | Potri.004G067000.1 | 4.8764  | 10.2     | -1.0647 | Down | 2.77E-17 | 1.11E-16 |
| Unigene32608  | Potri.006G150200.1 | 7.043   | 14.7334  | -1.0648 | Down | 3.20E-20 | 1.43E-19 |
| Unigene21013  | Potri.001G134100.1 | 15.1727 | 31.7395  | -1.0648 | Down | 1.44E-11 | 4.49E-11 |
| Unigene4900   | Potri.016G096900.2 | 30.1198 | 63.0134  | -1.0649 | Down | 5.98E-16 | 2.27E-15 |
| Unigene8877   | Potri.016G072700.2 | 13.0929 | 27.3915  | -1.0649 | Down | 1.10E-08 | 2.89E-08 |
| Unigene994    | Potri.012G081800.1 | 5.3064  | 11.1009  | -1.0649 | Down | 3.95E-10 | 1.14E-09 |
| Unigene34439  | Potri.004G027400.2 | 8.528   | 17.8403  | -1.0649 | Down | 8.46E-19 | 3.60E-18 |
| Unigene26347  | Potri.010G122500.6 | 23.904  | 50.0138  | -1.0651 | Down | 6.84E-19 | 2.92E-18 |
| Unigene15997  | Potri.009G080200.1 | 88.801  | 185.7935 | -1.0651 | Down | 4.45E-49 | 4.26E-48 |
| Unigene10499  | Potri.009G067200.2 | 48.4351 | 101.3408 | -1.0651 | Down | 2.97E-46 | 2.68E-45 |
| Unigene41290  | Potri.008G024500.1 | 10.4621 | 21.8895  | -1.0651 | Down | 3.09E-07 | 7.40E-07 |
| Unigene28808  | Potri.001G130500.1 | 14.1738 | 29.6567  | -1.0651 | Down | 1.82E-17 | 7.34E-17 |
| Unigene23741  | Potri.004G230200.1 | 38.9907 | 81.5851  | -1.0652 | Down | 2.86E-36 | 2.05E-35 |
| Unigene28777  | Potri.002G093900.1 | 15.3251 | 32.0663  | -1.0652 | Down | 7.95E-22 | 3.76E-21 |
| Unigene43956  | Potri.009G149100.2 | 21.5716 | 45.1414  | -1.0653 | Down | 1.31E-30 | 8.10E-30 |
| Unigene29403  | Potri.002G104000.1 | 12.8733 | 26.9383  | -1.0653 | Down | 1.29E-14 | 4.63E-14 |
| Unigene33970  | Potri.018G102500.1 | 39.1305 | 81.8922  | -1.0654 | Down | 5.21E-64 | 6.65E-63 |
| Unigene27280  | Potri.007G050600.2 | 17.5157 | 36.6554  | -1.0654 | Down | 3.48E-13 | 1.17E-12 |
| Unigene3019   | Potri.006G110800.1 | 12.8971 | 26.9901  | -1.0654 | Down | 3.48E-13 | 1.17E-12 |
| Unigene24291  | Potri.002G110800.1 | 40.5633 | 84.8912  | -1.0654 | Down | 1.10E-59 | 1.30E-58 |
| Unigene26488  | Potri.016G069200.2 | 25.6281 | 53.6389  | -1.0656 | Down | 7.23E-28 | 4.13E-27 |
| Unigene12612  | Potri.011G077900.2 | 14.6452 | 30.6525  | -1.0656 | Down | 1.19E-17 | 4.84E-17 |
| Unigene41409  | Potri.005G191400.1 | 32.0815 | 67.1489  | -1.0656 | Down | 2.24E-29 | 1.34E-28 |
| Unigene47609  | Potri.016G138400.2 | 6.3373  | 13.265   | -1.0657 | Down | 2.73E-04 | 5.00E-04 |
| Unigene85261  | Potri.008G098600.3 | 4.5487  | 9.5212   | -1.0657 | Down | 2.73E-04 | 5.00E-04 |

|               |                    |          |          |         |      |           |           |
|---------------|--------------------|----------|----------|---------|------|-----------|-----------|
| Unigene87170  | Potri.006G243100.2 | 4.1842   | 8.7583   | -1.0657 | Down | 2.73E-04  | 5.00E-04  |
| Unigene3381   | Potri.001G438300.2 | 12.9899  | 27.19    | -1.0657 | Down | 2.49E-07  | 6.01E-07  |
| Unigene66634  | Potri.002G152100.1 | 5.6501   | 11.8279  | -1.0658 | Down | 7.62E-12  | 2.40E-11  |
| Unigene53347  | Potri.006G196000.2 | 12.96    | 27.1307  | -1.0659 | Down | 7.62E-12  | 2.40E-11  |
| Unigene73778  | Potri.006G156100.2 | 30.9657  | 64.8271  | -1.0659 | Down | 2.56E-16  | 9.87E-16  |
| Unigene41364  | Potri.003G180300.1 | 9.4866   | 19.8603  | -1.0659 | Down | 7.13E-09  | 1.90E-08  |
| Unigene6528   | Potri.001G126200.1 | 3.6798   | 7.7037   | -1.0659 | Down | 7.13E-09  | 1.90E-08  |
| Unigene44749  | Potri.005G191300.1 | 11.4105  | 23.8908  | -1.0661 | Down | 2.38E-19  | 1.03E-18  |
| Unigene45572  | Potri.018G039000.1 | 7.1769   | 15.0286  | -1.0663 | Down | 2.13E-25  | 1.13E-24  |
| Unigene102037 | Potri.010G039900.1 | 7.3359   | 15.3617  | -1.0663 | Down | 2.01E-07  | 4.87E-07  |
| Unigene5350   | Potri.005G111700.1 | 2.936    | 6.1481   | -1.0663 | Down | 2.01E-07  | 4.87E-07  |
| Unigene29278  | Potri.004G210300.1 | 4.815    | 10.0828  | -1.0663 | Down | 2.01E-07  | 4.87E-07  |
| Unigene26617  | Potri.001G210500.3 | 37.2995  | 78.1089  | -1.0663 | Down | 5.90E-21  | 2.71E-20  |
| Unigene1281   | Potri.006G000300.1 | 5.617    | 11.7632  | -1.0664 | Down | 5.75E-09  | 1.54E-08  |
| Unigene11615  | Potri.001G108400.1 | 2.6842   | 5.6218   | -1.0665 | Down | 4.97E-12  | 1.58E-11  |
| Unigene50499  | Potri.017G078700.1 | 7.5981   | 15.9138  | -1.0666 | Down | 1.49E-13  | 5.09E-13  |
| Unigene6869   | Potri.006G127200.2 | 42.0003  | 87.9671  | -1.0666 | Down | 4.83E-36  | 3.44E-35  |
| Unigene22927  | Potri.005G058900.1 | 15.3713  | 32.1945  | -1.0666 | Down | 1.49E-13  | 5.09E-13  |
| Unigene18348  | Potri.005G148800.1 | 10.5396  | 22.0778  | -1.0668 | Down | 3.10E-39  | 2.39E-38  |
| Unigene45035  | Potri.T059800.1    | 6.2061   | 13.0011  | -1.0669 | Down | 3.34E-18  | 1.39E-17  |
| Unigene13259  | Potri.017G007400.1 | 3.2539   | 6.8166   | -1.0669 | Down | 5.80E-06  | 1.25E-05  |
| Unigene21262  | Potri.009G026100.1 | 3.2434   | 6.7946   | -1.0669 | Down | 1.36E-10  | 4.01E-10  |
| Unigene21871  | Potri.008G056600.1 | 9.474    | 19.8469  | -1.0669 | Down | 2.97E-24  | 1.52E-23  |
| Unigene11653  | Potri.006G197900.1 | 6.5625   | 13.7476  | -1.0669 | Down | 3.13E-21  | 1.45E-20  |
| Unigene34423  | Potri.005G217800.1 | 17.7914  | 37.2708  | -1.0669 | Down | 2.73E-30  | 1.67E-29  |
| Unigene21300  | Potri.005G188000.1 | 9.4148   | 19.7228  | -1.0669 | Down | 9.17E-26  | 4.91E-25  |
| Unigene39154  | Potri.005G070500.2 | 100.4166 | 210.3685 | -1.0669 | Down | 4.70E-125 | 1.33E-123 |
| Unigene14001  | Potri.002G223700.1 | 6.4351   | 13.4807  | -1.0669 | Down | 5.80E-06  | 1.25E-05  |
| Unigene7278   | Potri.002G020000.1 | 7.1679   | 15.0158  | -1.0669 | Down | 1.36E-10  | 4.01E-10  |
| Unigene16981  | Potri.001G090000.1 | 5.3797   | 11.2699  | -1.0669 | Down | 4.64E-09  | 1.25E-08  |
| Unigene18269  | Potri.003G201500.2 | 21.8945  | 45.8699  | -1.067  | Down | 6.88E-32  | 4.41E-31  |
| Unigene26868  | Potri.001G030900.4 | 65.1206  | 136.4406 | -1.0671 | Down | 9.73E-64  | 1.24E-62  |
| Unigene4942   | Potri.012G045800.1 | 6.4947   | 13.609   | -1.0672 | Down | 1.10E-10  | 3.25E-10  |
| Unigene28654  | Potri.017G051700.1 | 16.6795  | 34.9512  | -1.0673 | Down | 1.51E-27  | 8.53E-27  |
| Unigene25010  | Potri.006G045200.5 | 20.722   | 43.4223  | -1.0673 | Down | 2.19E-18  | 9.16E-18  |
| Unigene49851  | Potri.010G087700.3 | 8.6578   | 18.144   | -1.0674 | Down | 7.85E-14  | 2.72E-13  |
| Unigene23861  | Potri.002G023200.1 | 4.2215   | 8.847    | -1.0674 | Down | 1.30E-07  | 3.21E-07  |
| Unigene22321  | Potri.011G125700.1 | 6.5444   | 13.7161  | -1.0675 | Down | 5.81E-17  | 2.30E-16  |
| Unigene2494   | Potri.014G169400.3 | 7.0121   | 14.6965  | -1.0676 | Down | 1.34E-21  | 6.31E-21  |

|               |                    |         |         |         |      |          |          |
|---------------|--------------------|---------|---------|---------|------|----------|----------|
| Unigene29588  | Potri.011G141200.1 | 4.0383  | 8.4642  | -1.0676 | Down | 4.66E-06 | 1.01E-05 |
| Unigene33761  | Potri.005G116300.2 | 10.722  | 22.4729 | -1.0676 | Down | 1.91E-15 | 7.11E-15 |
| Unigene47901  | Potri.006G059700.1 | 26.0661 | 54.6378 | -1.0677 | Down | 1.09E-21 | 5.12E-21 |
| Unigene20077  | Potri.001G121100.1 | 20.4591 | 42.8842 | -1.0677 | Down | 6.35E-14 | 2.21E-13 |
| Unigene20909  | Potri.010G001500.1 | 34.2466 | 71.7899 | -1.0678 | Down | 2.71E-23 | 1.35E-22 |
| Unigene38379  | Potri.009G128700.3 | 47.2656 | 99.0814 | -1.0678 | Down | 9.94E-56 | 1.09E-54 |
| Unigene11624  | Potri.008G206200.2 | 10.102  | 21.176  | -1.0678 | Down | 3.55E-20 | 1.59E-19 |
| Unigene29196  | Potri.001G232400.1 | 11.8222 | 24.7825 | -1.0678 | Down | 2.12E-12 | 6.86E-12 |
| Unigene102798 | Potri.004G161200.6 | 1.6568  | 3.4734  | -1.0679 | Down | 1.75E-04 | 3.27E-04 |
| Unigene68669  | Potri.007G113300.1 | 1.9194  | 4.0241  | -1.068  | Down | 1.75E-04 | 3.27E-04 |
| Unigene24154  | Potri.005G226400.2 | 22.3372 | 46.8318 | -1.068  | Down | 4.26E-28 | 2.45E-27 |
| Unigene39236  | Potri.002G013900.1 | 5.6872  | 11.9231 | -1.068  | Down | 7.15E-11 | 2.14E-10 |
| Unigene35405  | Potri.001G439000.1 | 2.2699  | 4.7588  | -1.068  | Down | 1.75E-04 | 3.27E-04 |
| Unigene115772 | Potri.001G288000.5 | 4.6312  | 9.7092  | -1.068  | Down | 1.75E-04 | 3.27E-04 |
| Unigene33565  | Potri.001G057200.2 | 27.3878 | 57.4208 | -1.068  | Down | 4.26E-28 | 2.45E-27 |
| Unigene924    | Potri.008G118200.1 | 4.7826  | 10.0274 | -1.0681 | Down | 9.38E-19 | 3.99E-18 |
| Unigene13830  | Potri.005G191500.1 | 9.8734  | 20.7015 | -1.0681 | Down | 1.37E-26 | 7.55E-26 |
| Unigene45479  | Potri.001G178000.2 | 6.6974  | 14.0426 | -1.0681 | Down | 1.71E-12 | 5.57E-12 |
| Unigene40687  | Potri.001G111000.2 | 24.7276 | 51.8461 | -1.0681 | Down | 1.37E-26 | 7.55E-26 |
| Unigene69765  | Potri.015G079400.1 | 4.5703  | 9.583   | -1.0682 | Down | 2.44E-09 | 6.70E-09 |
| Unigene11352  | Potri.013G044100.1 | 7.7048  | 16.1553 | -1.0682 | Down | 5.36E-36 | 3.81E-35 |
| Unigene12941  | Potri.010G169100.2 | 34.0196 | 71.3308 | -1.0682 | Down | 4.24E-39 | 3.25E-38 |
| Unigene50250  | Potri.009G043100.4 | 8.5371  | 17.9012 | -1.0682 | Down | 4.15E-14 | 1.45E-13 |
| Unigene31932  | Potri.007G067700.3 | 8.7986  | 18.449  | -1.0682 | Down | 4.66E-64 | 5.95E-63 |
| Unigene90124  | Potri.004G036500.2 | 33.41   | 70.0555 | -1.0682 | Down | 8.68E-30 | 5.24E-29 |
| Unigene9249   | Potri.008G043700.3 | 15.9448 | 33.4365 | -1.0683 | Down | 5.77E-11 | 1.74E-10 |
| Unigene32780  | Potri.014G168700.1 | 38.8403 | 81.4513 | -1.0684 | Down | 1.59E-92 | 3.07E-91 |
| Unigene35789  | Potri.019G052400.1 | 14.3695 | 30.1389 | -1.0686 | Down | 1.97E-09 | 5.43E-09 |
| Unigene30128  | Potri.010G221000.3 | 16.979  | 35.6121 | -1.0686 | Down | 2.01E-17 | 8.13E-17 |
| Unigene49915  | Potri.T145700.1    | 7.1459  | 14.9893 | -1.0687 | Down | 1.12E-12 | 3.67E-12 |
| Unigene43279  | Potri.017G056000.1 | 11.5126 | 24.1498 | -1.0688 | Down | 1.20E-28 | 7.02E-28 |
| Unigene91534  | Potri.005G079600.1 | 44.7595 | 93.8916 | -1.0688 | Down | 1.59E-44 | 1.38E-43 |
| Unigene3051   | Potri.005G020600.1 | 16.6866 | 35.0034 | -1.0688 | Down | 6.63E-16 | 2.51E-15 |
| Unigene45075  | Potri.T004600.1    | 1.5679  | 3.2895  | -1.069  | Down | 1.40E-04 | 2.65E-04 |
| Unigene64951  | Potri.018G149500.1 | 9.9816  | 20.9416 | -1.069  | Down | 3.02E-06 | 6.68E-06 |
| Unigene3433   | Potri.017G072800.4 | 6.7817  | 14.2283 | -1.069  | Down | 1.40E-04 | 2.65E-04 |
| Unigene29638  | Potri.016G097700.1 | 4.5356  | 9.5159  | -1.069  | Down | 6.82E-08 | 1.71E-07 |
| Unigene7227   | Potri.015G008700.2 | 14.803  | 31.057  | -1.069  | Down | 2.19E-14 | 7.78E-14 |
| Unigene16495  | Potri.013G026800.1 | 7.6203  | 15.9877 | -1.069  | Down | 3.02E-06 | 6.68E-06 |

|              |                    |         |         |         |      |           |           |
|--------------|--------------------|---------|---------|---------|------|-----------|-----------|
| Unigene98433 | Potri.007G045700.1 | 7.7537  | 16.2675 | -1.069  | Down | 1.59E-09  | 4.40E-09  |
| Unigene45543 | Potri.006G077000.2 | 3.2621  | 6.844   | -1.069  | Down | 6.82E-08  | 1.71E-07  |
| Unigene29185 | Potri.005G140500.3 | 7.4756  | 15.6841 | -1.069  | Down | 1.59E-09  | 4.40E-09  |
| Unigene41305 | Potri.002G159100.2 | 3.8411  | 8.0588  | -1.069  | Down | 1.40E-04  | 2.65E-04  |
| Unigene30580 | Potri.002G140200.1 | 7.6615  | 16.0741 | -1.069  | Down | 6.82E-08  | 1.71E-07  |
| Unigene11231 | Potri.001G456400.1 | 16.6471 | 34.9261 | -1.069  | Down | 5.01E-24  | 2.55E-23  |
| Unigene53770 | Potri.001G230200.1 | 12.7923 | 26.8385 | -1.069  | Down | 1.59E-09  | 4.40E-09  |
| Unigene18491 | Potri.006G254900.2 | 8.9882  | 18.8595 | -1.0692 | Down | 4.06E-24  | 2.07E-23  |
| Unigene44282 | Potri.008G020200.1 | 6.5421  | 13.7282 | -1.0693 | Down | 7.31E-13  | 2.42E-12  |
| Unigene23798 | Potri.006G152100.3 | 8.272   | 17.3585 | -1.0693 | Down | 6.72E-34  | 4.53E-33  |
| Unigene821   | Potri.002G061000.2 | 6.9518  | 14.5882 | -1.0693 | Down | 1.32E-22  | 6.38E-22  |
| Unigene13206 | Potri.011G122500.2 | 13.205  | 27.7116 | -1.0694 | Down | 2.13E-19  | 9.29E-19  |
| Unigene53333 | Potri.008G128900.2 | 10.47   | 21.9726 | -1.0694 | Down | 1.28E-09  | 3.57E-09  |
| Unigene8192  | Potri.001G090900.1 | 18.6941 | 39.2307 | -1.0694 | Down | 2.13E-19  | 9.29E-19  |
| Unigene32676 | Potri.018G123600.1 | 5.1656  | 10.8413 | -1.0695 | Down | 4.28E-21  | 1.98E-20  |
| Unigene28721 | Potri.016G024300.2 | 9.4064  | 19.7411 | -1.0695 | Down | 3.51E-16  | 1.35E-15  |
| Unigene49195 | Potri.008G198900.2 | 3.6174  | 7.5925  | -1.0696 | Down | 5.91E-13  | 1.96E-12  |
| Unigene30894 | Potri.008G009700.2 | 27.6877 | 58.114  | -1.0696 | Down | 6.99E-18  | 2.87E-17  |
| Unigene19567 | Potri.006G121500.1 | 40.9385 | 85.9245 | -1.0696 | Down | 2.16E-24  | 1.11E-23  |
| Unigene14742 | Potri.005G070500.1 | 95.9184 | 201.32  | -1.0696 | Down | 1.11E-221 | 6.48E-220 |
| Unigene10830 | Potri.004G071900.1 | 14.9198 | 31.3151 | -1.0696 | Down | 2.76E-29  | 1.64E-28  |
| Unigene9598  | Potri.001G026800.2 | 16.0364 | 33.6583 | -1.0696 | Down | 5.91E-13  | 1.96E-12  |
| Unigene43093 | Potri.011G028400.4 | 34.8751 | 73.204  | -1.0697 | Down | 6.70E-49  | 6.39E-48  |
| Unigene86913 | Potri.005G164000.1 | 14.0479 | 29.4865 | -1.0697 | Down | 2.46E-11  | 7.55E-11  |
| Unigene52338 | Potri.003G212300.4 | 5.9927  | 12.5787 | -1.0697 | Down | 2.43E-06  | 5.41E-06  |
| Unigene31726 | Potri.018G101700.1 | 15.6626 | 32.8788 | -1.0698 | Down | 1.03E-09  | 2.90E-09  |
| Unigene27785 | Potri.014G135200.1 | 20.0446 | 42.0776 | -1.0698 | Down | 5.65E-18  | 2.33E-17  |
| Unigene4513  | Potri.012G096300.1 | 9.7522  | 20.4717 | -1.0698 | Down | 1.03E-09  | 2.90E-09  |
| Unigene85613 | Potri.011G001100.1 | 12.4332 | 26.0997 | -1.0698 | Down | 1.03E-09  | 2.90E-09  |
| Unigene19919 | Potri.008G105300.6 | 23.1257 | 48.5437 | -1.0698 | Down | 1.16E-14  | 4.17E-14  |
| Unigene7705  | Potri.013G029200.2 | 6.2395  | 13.0985 | -1.0699 | Down | 4.78E-13  | 1.60E-12  |
| Unigene12887 | Potri.016G075800.1 | 2.1842  | 4.5857  | -1.07   | Down | 1.12E-04  | 2.14E-04  |
| Unigene2957  | Potri.009G073200.1 | 3.3212  | 6.9728  | -1.07   | Down | 4.43E-08  | 1.12E-07  |
| Unigene45065 | Potri.006G144900.2 | 6.9669  | 14.6268 | -1.07   | Down | 4.57E-18  | 1.89E-17  |
| Unigene63055 | Potri.005G086100.1 | 2.0065  | 4.2125  | -1.07   | Down | 1.12E-04  | 2.14E-04  |
| Unigene28407 | Potri.002G192800.4 | 4.8979  | 10.2831 | -1.07   | Down | 1.12E-04  | 2.14E-04  |
| Unigene14581 | Potri.010G084800.1 | 21.2154 | 44.5439 | -1.0701 | Down | 9.16E-20  | 4.04E-19  |
| Unigene10567 | Potri.006G259400.6 | 32.7323 | 68.7249 | -1.0701 | Down | 9.16E-20  | 4.04E-19  |
| Unigene35547 | Potri.016G067300.1 | 63.461  | 133.253 | -1.0702 | Down | 5.62E-43  | 4.72E-42  |



|               |                     |         |          |         |      |           |           |
|---------------|---------------------|---------|----------|---------|------|-----------|-----------|
| Unigene14987  | Potri.015G106000.3  | 23.0182 | 48.3309  | -1.0702 | Down | 3.86E-13  | 1.30E-12  |
| Unigene45067  | Potri.010G139100.4  | 12.54   | 26.3299  | -1.0702 | Down | 9.27E-25  | 4.82E-24  |
| Unigene26136  | Potri.006G130500.2  | 55.5439 | 116.6245 | -1.0702 | Down | 2.25E-59  | 2.65E-58  |
| Unigene16643  | Potri.004G039000.2  | 26.4979 | 55.6411  | -1.0703 | Down | 7.59E-15  | 2.75E-14  |
| Unigene183    | Potri.019G012200.1  | 4.1242  | 8.6606   | -1.0704 | Down | 1.52E-26  | 8.36E-26  |
| Unigene43848  | Potri.015G006900.1  | 22.8557 | 47.9957  | -1.0704 | Down | 1.68E-36  | 1.21E-35  |
| Unigene42516  | Potri.007G127500.1  | 33.6037 | 70.5691  | -1.0704 | Down | 3.64E-101 | 7.90E-100 |
| Unigene15512  | Potri.004G174600.2  | 9.6099  | 20.1803  | -1.0704 | Down | 1.95E-06  | 4.39E-06  |
| Unigene33027  | Potri.001G094100.4  | 4.2566  | 8.9387   | -1.0704 | Down | 1.95E-06  | 4.39E-06  |
| Unigene2231   | Potri.017G122600.1  | 20.1157 | 42.2471  | -1.0705 | Down | 2.42E-43  | 2.05E-42  |
| Unigene30452  | Potri.002G205200.1  | 7.187   | 15.094   | -1.0705 | Down | 3.57E-08  | 9.14E-08  |
| Unigene43415  | Potri.002G080600.2  | 6.821   | 14.3253  | -1.0705 | Down | 3.57E-08  | 9.14E-08  |
| Unigene113853 | Potri.001G306100.1  | 11.2899 | 23.7108  | -1.0705 | Down | 3.57E-08  | 9.14E-08  |
| Unigene37037  | Potri.008G116600.1  | 19.9684 | 41.9442  | -1.0708 | Down | 4.96E-15  | 1.81E-14  |
| Unigene32971  | Potri.003G095700.2  | 8.7552  | 18.3913  | -1.0708 | Down | 3.93E-20  | 1.76E-19  |
| Unigene14922  | Potri.001G400900.4  | 35.5169 | 74.6086  | -1.0708 | Down | 1.60E-23  | 7.97E-23  |
| Unigene22962  | Potri.002G027300.4  | 25.3129 | 53.1751  | -1.0709 | Down | 5.54E-32  | 3.56E-31  |
| Unigene23068  | Potri.016G096900.1  | 21.4895 | 45.1463  | -1.071  | Down | 2.62E-25  | 1.38E-24  |
| Unigene15615  | Potri.014G045000.3  | 6.8755  | 14.4445  | -1.071  | Down | 9.01E-05  | 1.74E-04  |
| Unigene18583  | Potri.011G007200.1  | 2.937   | 6.1702   | -1.071  | Down | 9.01E-05  | 1.74E-04  |
| Unigene49429  | Potri.010G030600.3  | 4.6479  | 9.7646   | -1.071  | Down | 9.01E-05  | 1.74E-04  |
| Unigene107695 | Potri.009G128700.3  | 18.4651 | 38.7926  | -1.071  | Down | 5.44E-10  | 1.55E-09  |
| Unigene10738  | Potri.006G074700.1  | 6.2047  | 13.0351  | -1.071  | Down | 1.29E-23  | 6.47E-23  |
| Unigene25353  | Potri.005G188200.3  | 7.3497  | 15.4406  | -1.071  | Down | 9.01E-05  | 1.74E-04  |
| Unigene34643  | Potri.005G150200.1  | 4.4067  | 9.2579   | -1.071  | Down | 2.04E-13  | 6.93E-13  |
| Unigene38987  | Potri.005G060100.1  | 4.3625  | 9.165    | -1.071  | Down | 9.01E-05  | 1.74E-04  |
| Unigene39102  | Potri.004G212100.2  | 6.1483  | 12.9167  | -1.071  | Down | 1.57E-06  | 3.56E-06  |
| Unigene34285  | Potri.004G140600.10 | 44.4944 | 93.4765  | -1.071  | Down | 6.14E-81  | 1.02E-79  |
| Unigene1290   | Potri.001G354900.3  | 2.1919  | 4.605    | -1.071  | Down | 1.57E-06  | 3.56E-06  |
| Unigene30594  | Potri.001G272300.2  | 12.6439 | 26.5631  | -1.071  | Down | 7.96E-17  | 3.14E-16  |
| Unigene49974  | Potri.006G180100.1  | 42.8518 | 90.0333  | -1.0711 | Down | 1.68E-52  | 1.73E-51  |
| Unigene53981  | Potri.019G025400.1  | 10.2371 | 21.5122  | -1.0713 | Down | 4.39E-10  | 1.26E-09  |
| Unigene27141  | Potri.014G041300.3  | 53.8653 | 113.1864 | -1.0713 | Down | 2.97E-44  | 2.56E-43  |
| Unigene8034   | Potri.010G238400.1  | 8.4091  | 17.6707  | -1.0713 | Down | 4.39E-10  | 1.26E-09  |
| Unigene6112   | Potri.017G101200.1  | 7.0756  | 14.8695  | -1.0714 | Down | 2.32E-08  | 6.00E-08  |
| Unigene4284   | Potri.002G263200.1  | 5.2271  | 10.9849  | -1.0714 | Down | 2.32E-08  | 6.00E-08  |
| Unigene37672  | Potri.T077700.1     | 16.1446 | 33.9304  | -1.0715 | Down | 8.41E-19  | 3.58E-18  |
| Unigene28686  | Potri.018G088300.2  | 40.7226 | 85.5843  | -1.0715 | Down | 5.74E-60  | 6.82E-59  |
| Unigene50286  | Potri.015G045800.1  | 12.8125 | 26.9264  | -1.0715 | Down | 2.29E-27  | 1.29E-26  |

|               |                    |         |          |         |      |           |          |
|---------------|--------------------|---------|----------|---------|------|-----------|----------|
| Unigene86257  | Potri.011G023900.1 | 96.4299 | 202.6732 | -1.0716 | Down | 5.63E-67  | 7.56E-66 |
| Unigene33562  | Potri.003G171400.1 | 9.6615  | 20.3059  | -1.0716 | Down | 6.83E-12  | 2.16E-11 |
| Unigene10651  | Potri.007G051500.3 | 9.087   | 19.1004  | -1.0717 | Down | 9.99E-52  | 1.01E-50 |
| Unigene85716  | Potri.004G137100.2 | 20.8213 | 43.7633  | -1.0717 | Down | 2.12E-15  | 7.87E-15 |
| Unigene8419   | Potri.003G143200.1 | 12.6188 | 26.5236  | -1.0717 | Down | 6.81E-19  | 2.91E-18 |
| Unigene4206   | Potri.011G130100.5 | 10.8191 | 22.7417  | -1.0718 | Down | 1.08E-13  | 3.71E-13 |
| Unigene32263  | Potri.002G243800.1 | 5.7087  | 12.0001  | -1.0718 | Down | 3.64E-24  | 1.86E-23 |
| Unigene89060  | Potri.018G142100.2 | 22.0358 | 46.323   | -1.0719 | Down | 5.51E-19  | 2.36E-18 |
| Unigene17423  | Potri.014G088600.1 | 3.1402  | 6.6013   | -1.0719 | Down | 7.22E-05  | 1.41E-04 |
| Unigene4138   | Potri.012G064200.1 | 6.3193  | 13.2844  | -1.0719 | Down | 7.22E-05  | 1.41E-04 |
| Unigene21610  | Potri.009G014800.1 | 2.5194  | 5.2962   | -1.0719 | Down | 7.22E-05  | 1.41E-04 |
| Unigene589    | Potri.014G138700.3 | 12.3849 | 26.0375  | -1.072  | Down | 1.56E-95  | 3.14E-94 |
| Unigene29516  | Potri.008G195900.4 | 4.6232  | 9.7199   | -1.072  | Down | 2.86E-10  | 8.30E-10 |
| Unigene42553  | Potri.012G024500.3 | 10.597  | 22.2804  | -1.0721 | Down | 4.17E-40  | 3.28E-39 |
| Unigene79007  | Potri.009G099400.1 | 54.706  | 115.0302 | -1.0722 | Down | 1.76E-31  | 1.11E-30 |
| Unigene116586 | Potri.008G130600.1 | 7.1376  | 15.0074  | -1.0722 | Down | 1.02E-06  | 2.34E-06 |
| Unigene22701  | Potri.006G212500.1 | 3.1506  | 6.6245   | -1.0722 | Down | 1.02E-06  | 2.34E-06 |
| Unigene28699  | Potri.002G121000.1 | 13.8959 | 29.2196  | -1.0723 | Down | 5.86E-21  | 2.69E-20 |
| Unigene34058  | Potri.002G061400.4 | 46.748  | 98.3028  | -1.0723 | Down | 1.15E-73  | 1.72E-72 |
| Unigene1247   | Potri.008G109100.2 | 10.2023 | 21.4556  | -1.0725 | Down | 3.60E-12  | 1.15E-11 |
| Unigene23746  | Potri.003G077100.1 | 6.9683  | 14.6549  | -1.0725 | Down | 2.08E-26  | 1.14E-25 |
| Unigene47296  | Potri.013G100500.2 | 74.7907 | 157.3003 | -1.0726 | Down | 1.02E-100 | 2.21E-99 |
| Unigene31525  | Potri.002G029900.1 | 61.1298 | 128.5724 | -1.0726 | Down | 1.20E-56  | 1.34E-55 |
| Unigene110187 | Potri.018G086800.3 | 10.6329 | 22.3655  | -1.0727 | Down | 8.19E-07  | 1.90E-06 |
| Unigene46640  | Potri.017G070200.2 | 12.5998 | 26.5028  | -1.0727 | Down | 2.91E-12  | 9.36E-12 |
| Unigene33617  | Potri.001G317500.2 | 13.3043 | 27.9846  | -1.0727 | Down | 7.35E-16  | 2.78E-15 |
| Unigene51614  | Potri.001G049300.3 | 4.4379  | 9.3348   | -1.0727 | Down | 5.79E-05  | 1.14E-04 |
| Unigene4678   | Potri.016G130000.1 | 5.6555  | 11.896   | -1.0728 | Down | 5.79E-05  | 1.14E-04 |
| Unigene39522  | Potri.006G273700.1 | 5.3068  | 11.1626  | -1.0728 | Down | 1.87E-10  | 5.46E-10 |
| Unigene2269   | Potri.014G148500.1 | 11.6518 | 24.5122  | -1.0729 | Down | 5.94E-16  | 2.26E-15 |
| Unigene1711   | Potri.011G065200.1 | 19.2981 | 40.5961  | -1.0729 | Down | 4.11E-23  | 2.03E-22 |
| Unigene22723  | Potri.006G100100.2 | 10.7191 | 22.5505  | -1.073  | Down | 3.72E-14  | 1.31E-13 |
| Unigene44868  | Potri.002G183600.1 | 14.802  | 31.1406  | -1.073  | Down | 8.97E-36  | 6.35E-35 |
| Unigene112501 | Potri.008G199100.4 | 13.0472 | 27.4516  | -1.0732 | Down | 9.82E-09  | 2.61E-08 |
| Unigene44864  | Potri.003G120600.1 | 8.4923  | 17.8681  | -1.0732 | Down | 2.70E-23  | 1.34E-22 |
| Unigene23301  | Potri.016G104900.1 | 4.7648  | 10.0262  | -1.0733 | Down | 6.59E-07  | 1.54E-06 |
| Unigene23047  | Potri.015G137200.1 | 8.2175  | 17.2914  | -1.0733 | Down | 1.90E-12  | 6.17E-12 |
| Unigene53762  | Potri.009G134900.2 | 17.4884 | 36.7996  | -1.0733 | Down | 1.90E-12  | 6.17E-12 |
| Unigene45585  | Potri.010G174100.1 | 6.5702  | 13.8266  | -1.0734 | Down | 1.77E-23  | 8.80E-23 |

|               |                    |         |         |         |      |          |          |
|---------------|--------------------|---------|---------|---------|------|----------|----------|
| Unigene15229  | Potri.007G011800.1 | 4.6033  | 9.6871  | -1.0734 | Down | 1.22E-10 | 3.60E-10 |
| Unigene33429  | Potri.006G180100.1 | 7.9503  | 16.7305 | -1.0734 | Down | 1.22E-10 | 3.60E-10 |
| Unigene69805  | Potri.014G106400.7 | 2.2153  | 4.6624  | -1.0736 | Down | 4.65E-05 | 9.22E-05 |
| Unigene37035  | Potri.014G018100.1 | 12.7799 | 26.8969 | -1.0736 | Down | 7.92E-09 | 2.11E-08 |
| Unigene54740  | Potri.008G069700.6 | 8.1004  | 17.0483 | -1.0736 | Down | 3.15E-16 | 1.21E-15 |
| Unigene14932  | Potri.003G134200.3 | 25.3578 | 53.3685 | -1.0736 | Down | 3.15E-16 | 1.21E-15 |
| Unigene8400   | Potri.017G042200.3 | 15.0947 | 31.7714 | -1.0737 | Down | 1.16E-23 | 5.81E-23 |
| Unigene47894  | Potri.019G043400.1 | 7.5294  | 15.8494 | -1.0738 | Down | 5.31E-07 | 1.25E-06 |
| Unigene8461   | Potri.009G019200.4 | 29.2991 | 61.6756 | -1.0738 | Down | 1.01E-47 | 9.44E-47 |
| Unigene54411  | Potri.005G209900.2 | 4.4202  | 9.3045  | -1.0738 | Down | 1.24E-12 | 4.06E-12 |
| Unigene74419  | Potri.004G142300.5 | 30.0131 | 63.1749 | -1.0738 | Down | 2.54E-16 | 9.82E-16 |
| Unigene49838  | Potri.002G169700.2 | 3.1734  | 6.68    | -1.0738 | Down | 5.31E-07 | 1.25E-06 |
| Unigene11812  | Potri.011G064000.1 | 16.8272 | 35.4243 | -1.0739 | Down | 6.34E-59 | 7.39E-58 |
| Unigene31159  | Potri.019G087100.1 | 20.7573 | 43.6982 | -1.074  | Down | 7.60E-24 | 3.83E-23 |
| Unigene28343  | Potri.018G058900.4 | 19.4292 | 40.9049 | -1.074  | Down | 2.40E-31 | 1.52E-30 |
| Unigene116716 | Potri.016G066100.4 | 9.8634  | 20.7644 | -1.074  | Down | 6.39E-09 | 1.71E-08 |
| Unigene13931  | Potri.011G000900.7 | 7.8106  | 16.4433 | -1.074  | Down | 2.68E-18 | 1.12E-17 |
| Unigene15706  | Potri.001G360800.1 | 13.0324 | 27.4357 | -1.074  | Down | 6.39E-09 | 1.71E-08 |
| Unigene32444  | Potri.008G018600.1 | 10.6037 | 22.3251 | -1.0741 | Down | 8.17E-26 | 4.38E-25 |
| Unigene111430 | Potri.T071100.1    | 17.6851 | 37.2406 | -1.0743 | Down | 6.40E-11 | 1.93E-10 |
| Unigene29361  | Potri.019G063900.2 | 11.352  | 23.9046 | -1.0743 | Down | 1.04E-14 | 3.74E-14 |
| Unigene18378  | Potri.006G031900.1 | 7.8751  | 16.5831 | -1.0743 | Down | 2.31E-20 | 1.04E-19 |
| Unigene92534  | Potri.005G066800.1 | 3.3979  | 7.1551  | -1.0743 | Down | 3.73E-05 | 7.47E-05 |
| Unigene453    | Potri.016G128900.2 | 3.8964  | 8.205   | -1.0744 | Down | 9.54E-30 | 5.75E-29 |
| Unigene45054  | Potri.019G130300.1 | 9.0439  | 19.0467 | -1.0745 | Down | 1.09E-16 | 4.27E-16 |
| Unigene44808  | Potri.016G041800.1 | 9.2208  | 19.4196 | -1.0745 | Down | 8.41E-15 | 3.04E-14 |
| Unigene37379  | Potri.010G075000.3 | 31.9504 | 67.2869 | -1.0745 | Down | 1.87E-20 | 8.45E-20 |
| Unigene11447  | Potri.009G065300.3 | 9.6268  | 20.2733 | -1.0745 | Down | 4.34E-26 | 2.35E-25 |
| Unigene118865 | Potri.009G021000.3 | 9.7462  | 20.5268 | -1.0746 | Down | 6.55E-13 | 2.17E-12 |
| Unigene49267  | Potri.008G097600.1 | 14.355  | 30.234  | -1.0746 | Down | 2.00E-22 | 9.61E-22 |
| Unigene8641   | Potri.001G253500.2 | 16.7621 | 35.3044 | -1.0746 | Down | 5.17E-11 | 1.56E-10 |
| Unigene1881   | Potri.011G155700.1 | 14.7213 | 31.0077 | -1.0747 | Down | 8.82E-17 | 3.47E-16 |
| Unigene9953   | Potri.006G041200.1 | 8.759   | 18.4491 | -1.0747 | Down | 4.16E-09 | 1.13E-08 |
| Unigene22949  | Potri.010G152300.3 | 14.159  | 29.8258 | -1.0748 | Down | 5.30E-13 | 1.77E-12 |
| Unigene75080  | Potri.009G136900.1 | 22.8226 | 48.0755 | -1.0748 | Down | 5.30E-13 | 1.77E-12 |
| Unigene11134  | Potri.006G259500.1 | 5.3513  | 11.2725 | -1.0748 | Down | 3.44E-07 | 8.20E-07 |
| Unigene90421  | Potri.015G123700.3 | 28.4141 | 59.857  | -1.0749 | Down | 1.87E-26 | 1.02E-25 |
| Unigene103184 | Potri.002G201300.4 | 2.1247  | 4.4763  | -1.075  | Down | 2.99E-05 | 6.04E-05 |
| Unigene2572   | Potri.019G103200.1 | 5.3285  | 11.2263 | -1.0751 | Down | 4.28E-13 | 1.43E-12 |

|              |                    |         |          |         |      |          |          |
|--------------|--------------------|---------|----------|---------|------|----------|----------|
| Unigene26689 | Potri.012G056500.1 | 51.3439 | 108.1758 | -1.0751 | Down | 1.23E-49 | 1.19E-48 |
| Unigene13836 | Potri.008G152900.3 | 5.623   | 11.8469  | -1.0751 | Down | 5.77E-17 | 2.29E-16 |
| Unigene29163 | Potri.002G101300.1 | 2.7698  | 5.8355   | -1.0751 | Down | 2.99E-05 | 6.04E-05 |
| Unigene29044 | Potri.018G086500.1 | 3.3773  | 7.1167   | -1.0753 | Down | 2.77E-07 | 6.66E-07 |
| Unigene22254 | Potri.016G067100.1 | 16.8086 | 35.418   | -1.0753 | Down | 6.55E-50 | 6.38E-49 |
| Unigene2712  | Potri.012G092000.1 | 4.7057  | 9.9158   | -1.0753 | Down | 2.77E-07 | 6.66E-07 |
| Unigene75264 | Potri.003G221100.2 | 30.8569 | 65.027   | -1.0754 | Down | 3.78E-17 | 1.51E-16 |
| Unigene10558 | Potri.001G399700.1 | 13.9109 | 29.3154  | -1.0754 | Down | 2.71E-09 | 7.42E-09 |
| Unigene5235  | Potri.001G335000.1 | 17.8287 | 37.5736  | -1.0755 | Down | 4.25E-21 | 1.96E-20 |
| Unigene49908 | Potri.013G011400.2 | 8.4603  | 17.8305  | -1.0756 | Down | 2.80E-13 | 9.45E-13 |
| Unigene33014 | Potri.011G109100.2 | 9.4982  | 20.0179  | -1.0756 | Down | 2.80E-13 | 9.45E-13 |
| Unigene50618 | Potri.010G152400.2 | 35.0739 | 73.9209  | -1.0756 | Down | 1.17E-40 | 9.33E-40 |
| Unigene83274 | Potri.006G177900.2 | 44.5368 | 93.8654  | -1.0756 | Down | 5.70E-29 | 3.36E-28 |
| Unigene14021 | Potri.TI03100.1    | 17.6521 | 37.2085  | -1.0758 | Down | 2.20E-11 | 6.78E-11 |
| Unigene45489 | Potri.019G071000.1 | 3.2251  | 6.7982   | -1.0758 | Down | 2.40E-05 | 4.90E-05 |
| Unigene92708 | Potri.018G116500.1 | 3.4523  | 7.277    | -1.0758 | Down | 2.40E-05 | 4.90E-05 |
| Unigene53163 | Potri.016G116900.1 | 7.2703  | 15.3249  | -1.0758 | Down | 2.40E-05 | 4.90E-05 |
| Unigene31350 | Potri.014G154600.4 | 21.5145 | 45.3501  | -1.0758 | Down | 2.47E-17 | 9.94E-17 |
| Unigene41124 | Potri.011G106600.5 | 12.6782 | 26.7242  | -1.0758 | Down | 2.23E-07 | 5.39E-07 |
| Unigene5071  | Potri.008G048000.1 | 4.4566  | 9.3939   | -1.0758 | Down | 2.18E-09 | 6.02E-09 |
| Unigene80417 | Potri.006G192600.2 | 13.8369 | 29.1667  | -1.0758 | Down | 2.18E-09 | 6.02E-09 |
| Unigene12515 | Potri.005G080300.1 | 12.6613 | 26.6918  | -1.076  | Down | 2.00E-17 | 8.07E-17 |
| Unigene28643 | Potri.008G092500.2 | 3.6707  | 7.7394   | -1.0762 | Down | 1.76E-09 | 4.88E-09 |
| Unigene70406 | Potri.015G101500.1 | 4.7515  | 10.0189  | -1.0763 | Down | 1.48E-13 | 5.06E-13 |
| Unigene4187  | Potri.006G241000.2 | 14.9626 | 31.5494  | -1.0763 | Down | 1.48E-13 | 5.06E-13 |
| Unigene25639 | Potri.003G151700.1 | 9.8157  | 20.6969  | -1.0763 | Down | 1.80E-07 | 4.37E-07 |
| Unigene40724 | Potri.009G125400.1 | 22.9452 | 48.3863  | -1.0764 | Down | 1.12E-19 | 4.94E-19 |
| Unigene1333  | Potri.006G224500.4 | 25.7119 | 54.2221  | -1.0764 | Down | 8.59E-40 | 6.71E-39 |
| Unigene34670 | Potri.014G106200.1 | 14.2672 | 30.0878  | -1.0765 | Down | 8.17E-34 | 5.49E-33 |
| Unigene5541  | Potri.012G002200.1 | 15.514  | 32.7172  | -1.0765 | Down | 1.19E-13 | 4.10E-13 |
| Unigene40989 | Potri.011G058400.2 | 4.0025  | 8.4407   | -1.0765 | Down | 1.93E-05 | 3.97E-05 |
| Unigene34063 | Potri.005G233000.4 | 4.1906  | 8.8375   | -1.0765 | Down | 1.19E-13 | 4.10E-13 |
| Unigene44441 | Potri.015G089100.1 | 10.1726 | 21.4543  | -1.0766 | Down | 1.01E-15 | 3.78E-15 |
| Unigene36398 | Potri.004G153200.2 | 19.1363 | 40.3599  | -1.0766 | Down | 1.16E-11 | 3.62E-11 |
| Unigene94021 | Potri.008G094000.1 | 7.4181  | 15.6463  | -1.0767 | Down | 9.65E-14 | 3.33E-13 |
| Unigene52163 | Potri.002G090900.2 | 22.3507 | 47.1433  | -1.0767 | Down | 5.18E-28 | 2.97E-27 |
| Unigene49188 | Potri.001G412800.1 | 6.1303  | 12.93    | -1.0767 | Down | 1.45E-07 | 3.55E-07 |
| Unigene43967 | Potri.006G219500.2 | 9.3086  | 19.6367  | -1.0769 | Down | 7.80E-14 | 2.70E-13 |
| Unigene8204  | Potri.017G093300.3 | 4.6144  | 9.7356   | -1.0771 | Down | 1.55E-05 | 3.21E-05 |

|               |                    |          |          |         |      |           |           |
|---------------|--------------------|----------|----------|---------|------|-----------|-----------|
| Unigene6727   | Potri.015G134100.1 | 3.1632   | 6.6739   | -1.0771 | Down | 1.17E-07  | 2.88E-07  |
| Unigene50340  | Potri.006G264100.1 | 6.8949   | 14.5471  | -1.0771 | Down | 6.31E-14  | 2.19E-13  |
| Unigene82869  | Potri.006G108700.3 | 13.5635  | 28.6167  | -1.0771 | Down | 9.26E-10  | 2.60E-09  |
| Unigene731    | Potri.019G060900.1 | 4.9129   | 10.3659  | -1.0772 | Down | 1.23E-34  | 8.43E-34  |
| Unigene106172 | Potri.015G029600.1 | 3.334    | 7.0343   | -1.0772 | Down | 1.55E-05  | 3.21E-05  |
| Unigene54263  | Potri.002G263000.1 | 7.4347   | 15.6865  | -1.0772 | Down | 3.36E-57  | 3.79E-56  |
| Unigene43838  | Potri.001G120900.1 | 2.1887   | 4.6179   | -1.0772 | Down | 1.55E-05  | 3.21E-05  |
| Unigene32328  | Potri.017G091700.1 | 14.7565  | 31.1365  | -1.0773 | Down | 5.43E-45  | 4.76E-44  |
| Unigene30275  | Potri.008G069200.4 | 36.9926  | 78.0552  | -1.0773 | Down | 2.73E-22  | 1.31E-21  |
| Unigene108050 | Potri.006G062800.1 | 39.6765  | 83.7192  | -1.0773 | Down | 3.16E-20  | 1.42E-19  |
| Unigene44050  | Potri.003G043900.1 | 31.7938  | 67.0867  | -1.0773 | Down | 8.79E-37  | 6.39E-36  |
| Unigene18295  | Potri.005G210200.1 | 6.852    | 14.4589  | -1.0774 | Down | 1.92E-24  | 9.87E-24  |
| Unigene2250   | Potri.005G123800.3 | 6.5963   | 13.9201  | -1.0774 | Down | 2.97E-18  | 1.24E-17  |
| Unigene12005  | Potri.016G062000.1 | 16.7891  | 35.4301  | -1.0775 | Down | 2.97E-18  | 1.24E-17  |
| Unigene50521  | Potri.006G117600.2 | 19.8386  | 41.8663  | -1.0775 | Down | 1.55E-24  | 8.01E-24  |
| Unigene45579  | Potri.006G193800.1 | 16.1555  | 34.0958  | -1.0776 | Down | 4.06E-62  | 5.01E-61  |
| Unigene15563  | Potri.002G138200.1 | 11.995   | 25.3149  | -1.0776 | Down | 9.40E-08  | 2.33E-07  |
| Unigene49106  | Potri.014G126700.1 | 43.0626  | 90.891   | -1.0777 | Down | 8.99E-48  | 8.40E-47  |
| Unigene19930  | Potri.010G099200.1 | 17.0175  | 35.9197  | -1.0778 | Down | 1.17E-22  | 5.69E-22  |
| Unigene44579  | Potri.007G104000.1 | 25.0653  | 52.9067  | -1.0778 | Down | 4.69E-52  | 4.78E-51  |
| Unigene24366  | Potri.003G021500.2 | 6.1747   | 13.0339  | -1.0778 | Down | 1.35E-20  | 6.15E-20  |
| Unigene11637  | Potri.015G129000.1 | 11.2086  | 23.6604  | -1.0779 | Down | 1.63E-37  | 1.21E-36  |
| Unigene48886  | Potri.004G172100.1 | 6.5562   | 13.8405  | -1.078  | Down | 7.58E-08  | 1.90E-07  |
| Unigene51769  | Potri.003G015100.1 | 21.07    | 44.4798  | -1.078  | Down | 2.69E-14  | 9.52E-14  |
| Unigene31810  | Potri.002G150800.1 | 8.6265   | 18.2117  | -1.078  | Down | 1.07E-37  | 7.96E-37  |
| Unigene63074  | Potri.013G064400.1 | 18.1378  | 38.2941  | -1.0781 | Down | 3.23E-12  | 1.04E-11  |
| Unigene24866  | Potri.008G126600.2 | 26.8883  | 56.7665  | -1.0781 | Down | 3.82E-27  | 2.14E-26  |
| Unigene1276   | Potri.008G197000.1 | 4.3412   | 9.166    | -1.0782 | Down | 1.49E-16  | 5.81E-16  |
| Unigene41064  | Potri.014G197900.1 | 116.8657 | 246.7654 | -1.0783 | Down | 1.84E-108 | 4.35E-107 |
| Unigene29420  | Potri.009G010400.1 | 5.0863   | 10.7404  | -1.0784 | Down | 6.10E-08  | 1.54E-07  |
| Unigene21137  | Potri.006G147800.3 | 8.0387   | 16.9748  | -1.0784 | Down | 6.10E-08  | 1.54E-07  |
| Unigene3560   | Potri.005G168300.1 | 9.491    | 20.0415  | -1.0784 | Down | 3.93E-10  | 1.13E-09  |
| Unigene38444  | Potri.004G208400.1 | 3.5456   | 7.487    | -1.0784 | Down | 9.99E-06  | 2.11E-05  |
| Unigene38149  | Potri.003G161400.1 | 4.4194   | 9.3321   | -1.0784 | Down | 9.99E-06  | 2.11E-05  |
| Unigene13381  | Potri.017G035800.3 | 14.8562  | 31.3748  | -1.0785 | Down | 9.46E-30  | 5.70E-29  |
| Unigene51392  | Potri.008G135400.1 | 41.5821  | 87.8121  | -1.0785 | Down | 1.64E-27  | 9.28E-27  |
| Unigene19306  | Potri.018G000500.1 | 14.9198  | 31.5103  | -1.0786 | Down | 2.11E-12  | 6.82E-12  |
| Unigene26095  | Potri.012G063500.3 | 21.8304  | 46.104   | -1.0786 | Down | 1.42E-14  | 5.10E-14  |
| Unigene51797  | Potri.007G095800.1 | 16.6693  | 35.2065  | -1.0786 | Down | 3.17E-10  | 9.17E-10  |

|               |                    |         |          |         |      |          |          |
|---------------|--------------------|---------|----------|---------|------|----------|----------|
| Unigene36444  | Potri.004G040600.3 | 20.9377 | 44.2187  | -1.0786 | Down | 1.42E-14 | 5.10E-14 |
| Unigene18844  | Potri.013G035800.3 | 11.1386 | 23.5269  | -1.0787 | Down | 1.15E-14 | 4.14E-14 |
| Unigene113226 | Potri.004G152800.4 | 22.4981 | 47.5206  | -1.0787 | Down | 1.15E-14 | 4.14E-14 |
| Unigene83530  | Potri.010G125400.7 | 84.2694 | 178.0056 | -1.0788 | Down | 4.62E-54 | 4.90E-53 |
| Unigene33201  | Potri.010G068900.1 | 19.9819 | 42.2075  | -1.0788 | Down | 5.03E-30 | 3.05E-29 |
| Unigene107897 | Potri.011G113500.1 | 18.6498 | 39.3973  | -1.0789 | Down | 2.56E-10 | 7.44E-10 |
| Unigene17148  | Potri.014G120300.1 | 16.2054 | 34.2355  | -1.079  | Down | 5.17E-17 | 2.05E-16 |
| Unigene118205 | Potri.015G110500.1 | 6.9206  | 14.6216  | -1.0791 | Down | 3.97E-08 | 1.01E-07 |
| Unigene118077 | Potri.005G091600.1 | 7.0915  | 14.9826  | -1.0791 | Down | 3.97E-08 | 1.01E-07 |
| Unigene75816  | Potri.013G123500.1 | 56.2854 | 118.9265 | -1.0792 | Down | 1.75E-30 | 1.08E-29 |
| Unigene32912  | Potri.011G063100.1 | 11.5829 | 24.4751  | -1.0793 | Down | 1.42E-30 | 8.76E-30 |
| Unigene39689  | Potri.001G412800.1 | 12.7624 | 26.9675  | -1.0793 | Down | 1.42E-30 | 8.76E-30 |
| Unigene49104  | Potri.001G243400.1 | 23.9121 | 50.5263  | -1.0793 | Down | 4.30E-26 | 2.33E-25 |
| Unigene742    | Potri.019G082000.1 | 3.4666  | 7.326    | -1.0795 | Down | 1.67E-10 | 4.90E-10 |
| Unigene29611  | Potri.019G039200.1 | 3.3042  | 6.9828   | -1.0795 | Down | 6.45E-06 | 1.39E-05 |
| Unigene50400  | Potri.017G033600.1 | 7.9491  | 16.7987  | -1.0795 | Down | 1.67E-10 | 4.90E-10 |
| Unigene112345 | Potri.010G255600.1 | 20.0369 | 42.3439  | -1.0795 | Down | 8.98E-13 | 2.96E-12 |
| Unigene38407  | Potri.006G188800.1 | 2.8949  | 6.1177   | -1.0795 | Down | 6.45E-06 | 1.39E-05 |
| Unigene16520  | Potri.003G052100.1 | 15.8462 | 33.4877  | -1.0795 | Down | 4.93E-24 | 2.51E-23 |
| Unigene13492  | Potri.018G066500.1 | 12.2767 | 25.9469  | -1.0796 | Down | 3.53E-33 | 2.34E-32 |
| Unigene11474  | Potri.005G158300.5 | 23.3893 | 49.4308  | -1.0796 | Down | 1.46E-37 | 1.08E-36 |
| Unigene39622  | Potri.009G144800.2 | 6.8907  | 14.5651  | -1.0798 | Down | 1.79E-17 | 7.24E-17 |
| Unigene77825  | Potri.017G106300.1 | 21.1311 | 44.6694  | -1.0799 | Down | 5.86E-13 | 1.95E-12 |
| Unigene25126  | Potri.016G084000.3 | 10.5238 | 22.2454  | -1.0799 | Down | 2.58E-08 | 6.64E-08 |
| Unigene41376  | Potri.015G017500.1 | 14.1076 | 29.8223  | -1.0799 | Down | 5.86E-13 | 1.95E-12 |
| Unigene5300   | Potri.011G096300.2 | 13.3939 | 28.3123  | -1.0799 | Down | 2.58E-08 | 6.64E-08 |
| Unigene9731   | Potri.009G018500.1 | 5.5375  | 11.7066  | -1.08   | Down | 5.19E-06 | 1.12E-05 |
| Unigene21387  | Potri.006G120800.1 | 20.8157 | 44.0037  | -1.08   | Down | 4.18E-97 | 8.62E-96 |
| Unigene40620  | Potri.003G169900.1 | 3.7944  | 8.0216   | -1.08   | Down | 5.19E-06 | 1.12E-05 |
| Unigene6826   | Potri.002G000200.2 | 3.2676  | 6.9079   | -1.08   | Down | 5.19E-06 | 1.12E-05 |
| Unigene105459 | Potri.003G098100.1 | 5.7087  | 12.0694  | -1.0801 | Down | 4.74E-13 | 1.58E-12 |
| Unigene20774  | Potri.002G154500.2 | 14.7644 | 31.2153  | -1.0801 | Down | 4.74E-13 | 1.58E-12 |
| Unigene39347  | Potri.005G102200.1 | 14.1707 | 29.9624  | -1.0802 | Down | 8.42E-41 | 6.73E-40 |
| Unigene3022   | Potri.006G016100.1 | 3.6085  | 7.6301   | -1.0803 | Down | 8.79E-11 | 2.62E-10 |
| Unigene84228  | Potri.003G082500.1 | 21.7581 | 46.0091  | -1.0804 | Down | 1.70E-15 | 6.34E-15 |
| Unigene18800  | Potri.003G142100.1 | 5.7005  | 12.0556  | -1.0805 | Down | 1.68E-08 | 4.38E-08 |
| Unigene77828  | Potri.015G020700.1 | 65.7945 | 139.1822 | -1.0809 | Down | 3.75E-37 | 2.75E-36 |
| Unigene847    | Potri.010G099300.1 | 8.5054  | 17.992   | -1.0809 | Down | 1.19E-27 | 6.76E-27 |
| Unigene25658  | Potri.008G025900.4 | 10.7696 | 22.781   | -1.0809 | Down | 1.35E-08 | 3.54E-08 |

|               |                     |         |          |         |      |          |          |
|---------------|---------------------|---------|----------|---------|------|----------|----------|
| Unigene94633  | Potri.004G162500.1  | 11.5855 | 24.5069  | -1.0809 | Down | 1.35E-08 | 3.54E-08 |
| Unigene43816  | Potri.002G213600.1  | 31.6158 | 66.8797  | -1.0809 | Down | 2.10E-32 | 1.36E-31 |
| Unigene22047  | Potri.001G240400.3  | 7.9237  | 16.7612  | -1.0809 | Down | 1.35E-08 | 3.54E-08 |
| Unigene13329  | Potri.001G239700.1  | 9.3675  | 19.8174  | -1.081  | Down | 4.63E-11 | 1.40E-10 |
| Unigene24752  | Potri.010G004700.2  | 14.7422 | 31.1914  | -1.0812 | Down | 1.09E-08 | 2.87E-08 |
| Unigene111760 | Potri.002G051800.3  | 13.1181 | 27.755   | -1.0812 | Down | 1.09E-08 | 2.87E-08 |
| Unigene2893   | Potri.005G000300.1  | 12.359  | 26.1504  | -1.0813 | Down | 7.94E-21 | 3.63E-20 |
| Unigene16304  | Potri.003G119200.1  | 23.2932 | 49.2884  | -1.0813 | Down | 4.16E-28 | 2.39E-27 |
| Unigene74470  | Potri.011G052700.2  | 57.6762 | 122.044  | -1.0814 | Down | 1.57E-30 | 9.66E-30 |
| Unigene22206  | Potri.015G143000.2  | 12.1845 | 25.7855  | -1.0815 | Down | 1.41E-18 | 5.95E-18 |
| Unigene16734  | Potri.008G205400.1  | 5.7227  | 12.1106  | -1.0815 | Down | 2.70E-06 | 5.99E-06 |
| Unigene16295  | Potri.004G208500.2  | 16.6436 | 35.2221  | -1.0815 | Down | 3.02E-11 | 9.22E-11 |
| Unigene18135  | Potri.004G140600.10 | 8.2888  | 17.5412  | -1.0815 | Down | 1.07E-13 | 3.68E-13 |
| Unigene45337  | Potri.009G115100.1  | 12.4332 | 26.3185  | -1.0819 | Down | 6.98E-14 | 2.42E-13 |
| Unigene9667   | Potri.013G049100.3  | 10.1001 | 21.3812  | -1.082  | Down | 1.97E-11 | 6.07E-11 |
| Unigene16433  | Potri.010G152300.3  | 20.9465 | 44.3423  | -1.082  | Down | 2.23E-21 | 1.04E-20 |
| Unigene29627  | Potri.010G049400.1  | 4.4854  | 9.4952   | -1.082  | Down | 1.97E-11 | 6.07E-11 |
| Unigene40001  | Potri.004G233300.4  | 4.3213  | 9.1479   | -1.082  | Down | 2.17E-06 | 4.85E-06 |
| Unigene39632  | Potri.003G148200.1  | 3.3272  | 7.0434   | -1.082  | Down | 2.17E-06 | 4.85E-06 |
| Unigene77218  | Potri.001G206700.1  | 9.2438  | 19.5684  | -1.082  | Down | 2.17E-06 | 4.85E-06 |
| Unigene5621   | Potri.006G026900.4  | 13.478  | 28.5349  | -1.0821 | Down | 5.71E-09 | 1.53E-08 |
| Unigene32498  | Potri.002G140600.1  | 12.1191 | 25.6583  | -1.0821 | Down | 5.86E-34 | 3.96E-33 |
| Unigene25414  | Potri.001G078700.1  | 13.4216 | 28.4155  | -1.0821 | Down | 5.71E-09 | 1.53E-08 |
| Unigene87732  | Potri.017G081400.3  | 13.4045 | 28.3808  | -1.0822 | Down | 1.59E-11 | 4.92E-11 |
| Unigene22079  | Potri.016G086300.2  | 7.2402  | 15.3317  | -1.0824 | Down | 3.69E-14 | 1.30E-13 |
| Unigene32149  | Potri.012G139100.1  | 2.9514  | 6.2498   | -1.0824 | Down | 1.74E-06 | 3.95E-06 |
| Unigene12518  | Potri.006G069700.3  | 20.8418 | 44.134   | -1.0824 | Down | 8.79E-27 | 4.86E-26 |
| Unigene11171  | Potri.005G021000.1  | 27.2749 | 57.7547  | -1.0824 | Down | 3.03E-84 | 5.27E-83 |
| Unigene17677  | Potri.001G397200.1  | 22.674  | 48.0171  | -1.0825 | Down | 2.34E-24 | 1.20E-23 |
| Unigene41596  | Potri.017G043100.1  | 30.1839 | 63.9254  | -1.0826 | Down | 1.90E-24 | 9.77E-24 |
| Unigene46779  | Potri.009G033900.3  | 13.6765 | 28.9668  | -1.0827 | Down | 3.72E-09 | 1.01E-08 |
| Unigene114438 | Potri.003G087500.2  | 12.1569 | 25.7483  | -1.0827 | Down | 3.72E-09 | 1.01E-08 |
| Unigene21736  | Potri.014G088800.3  | 18.9996 | 40.2432  | -1.0828 | Down | 2.87E-32 | 1.85E-31 |
| Unigene3419   | Potri.013G069000.3  | 9.0563  | 19.1831  | -1.0828 | Down | 1.40E-06 | 3.19E-06 |
| Unigene78726  | Potri.009G118500.3  | 36.9861 | 78.3443  | -1.0828 | Down | 4.12E-22 | 1.96E-21 |
| Unigene22251  | Potri.014G088400.1  | 4.4269  | 9.3776   | -1.0829 | Down | 1.95E-14 | 6.93E-14 |
| Unigene262    | Potri.014G048500.1  | 8.5198  | 18.0504  | -1.0831 | Down | 6.24E-38 | 4.66E-37 |
| Unigene5204   | Potri.001G374100.1  | 55.3917 | 117.3515 | -1.0831 | Down | 1.93E-40 | 1.53E-39 |
| Unigene1194   | Potri.006G036600.1  | 9.5241  | 20.1785  | -1.0832 | Down | 2.19E-22 | 1.05E-21 |

|              |                    |         |          |         |      |          |          |
|--------------|--------------------|---------|----------|---------|------|----------|----------|
| Unigene3206  | Potri.012G031600.1 | 2.3657  | 5.0125   | -1.0833 | Down | 1.13E-06 | 2.58E-06 |
| Unigene83704 | Potri.001G130900.1 | 12.3418 | 26.1499  | -1.0833 | Down | 2.42E-09 | 6.65E-09 |
| Unigene7658  | Potri.018G047100.1 | 10.5488 | 22.353   | -1.0834 | Down | 2.45E-17 | 9.84E-17 |
| Unigene29231 | Potri.010G056100.1 | 12.4883 | 26.4634  | -1.0834 | Down | 1.03E-14 | 3.71E-14 |
| Unigene28673 | Potri.004G123600.2 | 10.7503 | 22.7801  | -1.0834 | Down | 2.45E-17 | 9.84E-17 |
| Unigene16551 | Potri.016G007600.1 | 5.3963  | 11.4359  | -1.0835 | Down | 1.95E-09 | 5.39E-09 |
| Unigene38682 | Potri.005G206500.4 | 20.2238 | 42.8574  | -1.0835 | Down | 4.77E-20 | 2.12E-19 |
| Unigene2460  | Potri.004G105200.1 | 3.6576  | 7.7512   | -1.0835 | Down | 1.95E-09 | 5.39E-09 |
| Unigene18171 | Potri.016G004400.1 | 7.4968  | 15.8887  | -1.0837 | Down | 3.57E-12 | 1.14E-11 |
| Unigene51278 | Potri.004G217800.1 | 15.4256 | 32.693   | -1.0837 | Down | 3.57E-12 | 1.14E-11 |
| Unigene1068  | Potri.008G137000.2 | 13.8824 | 29.4259  | -1.0838 | Down | 1.14E-57 | 1.29E-56 |
| Unigene14631 | Potri.005G190700.3 | 37.2995 | 79.0681  | -1.0839 | Down | 2.05E-20 | 9.24E-20 |
| Unigene33202 | Potri.001G124500.1 | 17.7137 | 37.5476  | -1.0839 | Down | 4.98E-23 | 2.45E-22 |
| Unigene60365 | Potri.018G140300.1 | 4.9414  | 10.4756  | -1.084  | Down | 7.32E-07 | 1.70E-06 |
| Unigene28887 | Potri.010G217900.1 | 6.4477  | 13.6689  | -1.084  | Down | 8.48E-18 | 3.47E-17 |
| Unigene36376 | Potri.017G137700.1 | 2.6828  | 5.6875   | -1.0841 | Down | 4.77E-04 | 8.45E-04 |
| Unigene5638  | Potri.005G185900.1 | 5.48    | 11.6175  | -1.0841 | Down | 4.77E-04 | 8.45E-04 |
| Unigene24258 | Potri.018G079800.5 | 14.1403 | 29.9802  | -1.0842 | Down | 8.50E-29 | 4.99E-28 |
| Unigene34510 | Potri.013G047100.3 | 5.7788  | 12.252   | -1.0842 | Down | 6.86E-18 | 2.82E-17 |
| Unigene44411 | Potri.003G223000.3 | 10.8682 | 23.0433  | -1.0842 | Down | 1.88E-12 | 6.11E-12 |
| Unigene38391 | Potri.008G112000.6 | 10.529  | 22.3251  | -1.0843 | Down | 1.03E-09 | 2.88E-09 |
| Unigene30533 | Potri.010G099900.1 | 10.879  | 23.0693  | -1.0844 | Down | 5.89E-07 | 1.38E-06 |
| Unigene29560 | Potri.004G210200.6 | 13.4551 | 28.5333  | -1.0845 | Down | 2.33E-15 | 8.62E-15 |
| Unigene9452  | Potri.017G128900.1 | 48.1619 | 102.141  | -1.0846 | Down | 4.04E-54 | 4.29E-53 |
| Unigene11623 | Potri.014G094300.1 | 3.9459  | 8.3682   | -1.0846 | Down | 8.28E-10 | 2.33E-09 |
| Unigene84601 | Potri.009G033900.4 | 16.918  | 35.8796  | -1.0846 | Down | 1.23E-12 | 4.02E-12 |
| Unigene16271 | Potri.003G086100.1 | 60.9226 | 129.2015 | -1.0846 | Down | 1.47E-48 | 1.39E-47 |
| Unigene23240 | Potri.T089300.2    | 39.9439 | 84.7188  | -1.0847 | Down | 1.30E-51 | 1.31E-50 |
| Unigene1081  | Potri.009G044300.1 | 7.3777  | 15.6476  | -1.0847 | Down | 1.20E-26 | 6.60E-26 |
| Unigene48562 | Potri.008G047700.3 | 4.852   | 10.2913  | -1.0848 | Down | 3.81E-04 | 6.88E-04 |
| Unigene44848 | Potri.005G098600.1 | 3.0179  | 6.4012   | -1.0848 | Down | 4.74E-07 | 1.12E-06 |
| Unigene78243 | Potri.005G083600.1 | 10.1151 | 21.4548  | -1.0848 | Down | 4.74E-07 | 1.12E-06 |
| Unigene27856 | Potri.004G204600.1 | 3.9006  | 8.2734   | -1.0848 | Down | 4.74E-07 | 1.12E-06 |
| Unigene30653 | Potri.003G174600.3 | 3.5313  | 7.4901   | -1.0848 | Down | 3.81E-04 | 6.88E-04 |
| Unigene47297 | Potri.006G185200.2 | 9.8608  | 20.9174  | -1.0849 | Down | 1.23E-15 | 4.61E-15 |
| Unigene19703 | Potri.015G141100.1 | 4.2218  | 8.9561   | -1.085  | Down | 5.39E-10 | 1.54E-09 |
| Unigene19367 | Potri.010G044900.2 | 7.9693  | 16.9061  | -1.085  | Down | 5.39E-10 | 1.54E-09 |
| Unigene54577 | Potri.011G047900.1 | 11.6561 | 24.7294  | -1.0851 | Down | 3.82E-07 | 9.07E-07 |
| Unigene18516 | Potri.017G142500.1 | 6.6374  | 14.0824  | -1.0852 | Down | 8.05E-16 | 3.04E-15 |



|               |                    |          |          |         |      |          |          |
|---------------|--------------------|----------|----------|---------|------|----------|----------|
| Unigene47485  | Potri.014G023500.1 | 8.3669   | 17.7531  | -1.0853 | Down | 5.24E-13 | 1.75E-12 |
| Unigene35764  | Potri.012G143800.1 | 13.7419  | 29.1569  | -1.0853 | Down | 4.35E-10 | 1.25E-09 |
| Unigene18462  | Potri.005G110600.1 | 10.6977  | 22.7     | -1.0854 | Down | 1.37E-24 | 7.10E-24 |
| Unigene23401  | Potri.012G078000.2 | 14.6825  | 31.1575  | -1.0855 | Down | 6.68E-19 | 2.85E-18 |
| Unigene100190 | Potri.010G113600.1 | 3.0543   | 6.4815   | -1.0855 | Down | 3.05E-04 | 5.55E-04 |
| Unigene8097   | Potri.010G077300.2 | 7.84     | 16.6372  | -1.0855 | Down | 3.51E-10 | 1.01E-09 |
| Unigene3180   | Potri.009G002400.1 | 9.692    | 20.5672  | -1.0855 | Down | 6.68E-19 | 2.85E-18 |
| Unigene22450  | Potri.008G048000.2 | 8.3962   | 17.8175  | -1.0855 | Down | 5.27E-16 | 2.00E-15 |
| Unigene11453  | Potri.001G454800.1 | 2.1863   | 4.6395   | -1.0855 | Down | 3.07E-07 | 7.36E-07 |
| Unigene67190  | Potri.001G233800.3 | 3.0392   | 6.4495   | -1.0855 | Down | 3.07E-07 | 7.36E-07 |
| Unigene53514  | Potri.001G073300.2 | 6.0043   | 12.7417  | -1.0855 | Down | 3.05E-04 | 5.55E-04 |
| Unigene38336  | Potri.001G015200.1 | 1.8317   | 3.887    | -1.0855 | Down | 3.05E-04 | 5.55E-04 |
| Unigene114452 | Potri.008G021900.1 | 27.4911  | 58.343   | -1.0856 | Down | 5.40E-19 | 2.32E-18 |
| Unigene53203  | Potri.003G030000.1 | 19.7643  | 41.9463  | -1.0856 | Down | 3.42E-13 | 1.15E-12 |
| Unigene45767  | Potri.016G136400.1 | 9.8003   | 20.8018  | -1.0858 | Down | 2.48E-07 | 5.97E-07 |
| Unigene14459  | Potri.010G048200.1 | 11.9003  | 25.2593  | -1.0858 | Down | 2.48E-07 | 5.97E-07 |
| Unigene50433  | Potri.010G027100.1 | 4.5273   | 9.6095   | -1.0858 | Down | 2.48E-07 | 5.97E-07 |
| Unigene53613  | Potri.008G200600.1 | 11.107   | 23.5753  | -1.0858 | Down | 2.48E-07 | 5.97E-07 |
| Unigene99773  | Potri.011G078300.1 | 10.5822  | 22.4631  | -1.0859 | Down | 2.29E-10 | 6.67E-10 |
| Unigene94842  | Potri.005G053700.1 | 3.3162   | 7.0395   | -1.0859 | Down | 2.29E-10 | 6.67E-10 |
| Unigene52000  | Potri.001G073800.2 | 15.4343  | 32.7618  | -1.0859 | Down | 2.79E-16 | 1.07E-15 |
| Unigene38874  | Potri.001G038000.3 | 16.0364  | 34.0422  | -1.086  | Down | 2.24E-13 | 7.59E-13 |
| Unigene44189  | Potri.006G256200.1 | 2.4915   | 5.2896   | -1.0861 | Down | 2.44E-04 | 4.48E-04 |
| Unigene88023  | Potri.006G165900.1 | 3.8901   | 8.2589   | -1.0861 | Down | 2.44E-04 | 4.48E-04 |
| Unigene2777   | Potri.005G206600.6 | 2.4963   | 5.3009   | -1.0864 | Down | 1.61E-07 | 3.92E-07 |
| Unigene41412  | Potri.T002300.1    | 7.6815   | 16.3128  | -1.0865 | Down | 1.20E-10 | 3.56E-10 |
| Unigene42052  | Potri.008G020400.1 | 31.342   | 66.5567  | -1.0865 | Down | 8.39E-23 | 4.09E-22 |
| Unigene12176  | Potri.013G086000.1 | 2.8425   | 6.0366   | -1.0866 | Down | 9.55E-14 | 3.29E-13 |
| Unigene70409  | Potri.011G009600.1 | 3.2516   | 6.9053   | -1.0866 | Down | 1.20E-10 | 3.56E-10 |
| Unigene87848  | Potri.001G237800.1 | 16.0515  | 34.089   | -1.0866 | Down | 9.55E-14 | 3.29E-13 |
| Unigene43092  | Potri.015G140600.1 | 3.4906   | 7.4138   | -1.0867 | Down | 7.72E-14 | 2.67E-13 |
| Unigene50399  | Potri.002G049600.1 | 14.0461  | 29.8312  | -1.0867 | Down | 6.51E-20 | 2.89E-19 |
| Unigene91071  | Potri.001G298400.1 | 3.2234   | 6.8464   | -1.0868 | Down | 1.95E-04 | 3.64E-04 |
| Unigene6668   | Potri.011G112800.2 | 15.1195  | 32.1174  | -1.0869 | Down | 3.45E-20 | 1.55E-19 |
| Unigene13085  | Potri.003G163200.1 | 9.9057   | 21.0415  | -1.0869 | Down | 1.31E-35 | 9.22E-35 |
| Unigene17350  | Potri.012G098500.1 | 5.1224   | 10.8819  | -1.087  | Down | 1.04E-07 | 2.58E-07 |
| Unigene44193  | Potri.006G117600.1 | 25.862   | 54.9407  | -1.087  | Down | 9.87E-33 | 6.47E-32 |
| Unigene87292  | Potri.008G114200.1 | 101.3265 | 215.2596 | -1.0871 | Down | 3.29E-76 | 5.10E-75 |
| Unigene7668   | Potri.008G094600.1 | 26.9415  | 57.2422  | -1.0872 | Down | 1.33E-45 | 1.18E-44 |

|               |                    |         |          |         |      |          |          |
|---------------|--------------------|---------|----------|---------|------|----------|----------|
| Unigene48780  | Potri.008G077300.1 | 3.6     | 7.6492   | -1.0873 | Down | 1.56E-04 | 2.93E-04 |
| Unigene34815  | Potri.007G082800.1 | 2.3893  | 5.0768   | -1.0873 | Down | 1.56E-04 | 2.93E-04 |
| Unigene26852  | Potri.005G213100.1 | 2.6278  | 5.5835   | -1.0873 | Down | 1.56E-04 | 2.93E-04 |
| Unigene33998  | Potri.003G146500.1 | 22.1338 | 47.0299  | -1.0873 | Down | 1.48E-20 | 6.71E-20 |
| Unigene49516  | Potri.003G131800.1 | 3.8921  | 8.27     | -1.0873 | Down | 1.56E-04 | 2.93E-04 |
| Unigene48788  | Potri.003G040700.3 | 7.1807  | 15.2575  | -1.0873 | Down | 5.12E-11 | 1.55E-10 |
| Unigene27592  | Potri.001G222600.9 | 3.2911  | 6.993    | -1.0873 | Down | 1.56E-04 | 2.93E-04 |
| Unigene1930   | Potri.002G138200.1 | 50.9577 | 108.2823 | -1.0874 | Down | 1.95E-74 | 2.94E-73 |
| Unigene11192  | Potri.002G005600.2 | 17.7091 | 37.6296  | -1.0874 | Down | 1.40E-39 | 1.08E-38 |
| Unigene15367  | Potri.006G244400.6 | 14.4172 | 30.6377  | -1.0875 | Down | 4.13E-11 | 1.26E-10 |
| Unigene75014  | Potri.010G174900.1 | 12.4902 | 26.5444  | -1.0876 | Down | 6.77E-08 | 1.70E-07 |
| Unigene21574  | Potri.013G113000.1 | 5.8083  | 12.345   | -1.0877 | Down | 1.74E-14 | 6.20E-14 |
| Unigene39629  | Potri.012G097200.2 | 9.9357  | 21.1162  | -1.0877 | Down | 1.16E-17 | 4.72E-17 |
| Unigene66930  | Potri.003G129300.1 | 6.5542  | 13.93    | -1.0877 | Down | 3.34E-11 | 1.02E-10 |
| Unigene8083   | Potri.010G120300.1 | 13.9778 | 29.7092  | -1.0878 | Down | 9.37E-18 | 3.83E-17 |
| Unigene37935  | Potri.013G005100.2 | 12.898  | 27.4161  | -1.0879 | Down | 5.45E-08 | 1.38E-07 |
| Unigene50956  | Potri.010G186700.1 | 4.6467  | 9.8772   | -1.0879 | Down | 1.25E-04 | 2.38E-04 |
| Unigene54247  | Potri.010G024100.3 | 5.3285  | 11.3263  | -1.0879 | Down | 1.25E-04 | 2.38E-04 |
| Unigene25789  | Potri.009G094900.3 | 3.232   | 6.8701   | -1.0879 | Down | 1.25E-04 | 2.38E-04 |
| Unigene52612  | Potri.007G053600.1 | 45.9667 | 97.7117  | -1.0879 | Down | 1.05E-27 | 5.98E-27 |
| Unigene17114  | Potri.005G014700.1 | 2.1038  | 4.4718   | -1.0879 | Down | 1.25E-04 | 2.38E-04 |
| Unigene14578  | Potri.001G455100.1 | 9.3883  | 19.9559  | -1.0879 | Down | 5.45E-08 | 1.38E-07 |
| Unigene13650  | Potri.011G059800.1 | 5.2779  | 11.2198  | -1.088  | Down | 1.14E-14 | 4.09E-14 |
| Unigene46765  | Potri.010G003500.1 | 33.0986 | 70.3584  | -1.088  | Down | 1.87E-24 | 9.65E-24 |
| Unigene882    | Potri.006G266900.1 | 21.979  | 46.724   | -1.088  | Down | 2.23E-34 | 1.52E-33 |
| Unigene22423  | Potri.004G163200.1 | 16.8158 | 35.7472  | -1.088  | Down | 8.53E-28 | 4.86E-27 |
| Unigene13812  | Potri.001G158200.1 | 7.1893  | 15.2829  | -1.088  | Down | 6.13E-18 | 2.53E-17 |
| Unigene31164  | Potri.006G041200.1 | 11.7677 | 25.0167  | -1.0881 | Down | 2.18E-11 | 6.71E-11 |
| Unigene8159   | Potri.015G099000.3 | 6.8503  | 14.5655  | -1.0883 | Down | 1.45E-21 | 6.78E-21 |
| Unigene10380  | Potri.018G081200.5 | 51.4379 | 109.3803 | -1.0884 | Down | 3.75E-65 | 4.88E-64 |
| Unigene88426  | Potri.016G079800.2 | 4.2564  | 9.0507   | -1.0884 | Down | 1.00E-04 | 1.93E-04 |
| Unigene12607  | Potri.012G096300.1 | 2.4693  | 5.2507   | -1.0884 | Down | 1.00E-04 | 1.93E-04 |
| Unigene110405 | Potri.012G054200.1 | 6.356   | 13.5152  | -1.0884 | Down | 1.00E-04 | 1.93E-04 |
| Unigene53466  | Potri.010G064300.1 | 4.7723  | 10.1478  | -1.0884 | Down | 1.00E-04 | 1.93E-04 |
| Unigene47833  | Potri.010G057400.4 | 5.3689  | 11.4163  | -1.0884 | Down | 1.00E-04 | 1.93E-04 |
| Unigene7813   | Potri.008G046600.1 | 3.4537  | 7.3446   | -1.0885 | Down | 1.15E-11 | 3.58E-11 |
| Unigene45733  | Potri.008G081400.1 | 25.9915 | 55.2774  | -1.0886 | Down | 3.93E-15 | 1.44E-14 |
| Unigene50323  | Potri.001G178400.1 | 3.6448  | 7.7515   | -1.0886 | Down | 2.85E-08 | 7.35E-08 |
| Unigene29501  | Potri.007G080500.1 | 9.2947  | 19.7675  | -1.0887 | Down | 3.93E-15 | 1.44E-14 |

|               |                     |          |          |         |      |           |           |
|---------------|---------------------|----------|----------|---------|------|-----------|-----------|
| Unigene25118  | Potri.010G161400.6  | 19.9272  | 42.3871  | -1.0889 | Down | 2.57E-15  | 9.50E-15  |
| Unigene23833  | Potri.005G093300.1  | 4.9228   | 10.4713  | -1.0889 | Down | 2.30E-08  | 5.95E-08  |
| Unigene40180  | Potri.003G174600.3  | 3.0369   | 6.4598   | -1.0889 | Down | 8.04E-05  | 1.56E-04  |
| Unigene96734  | Potri.001G157300.1  | 3.7109   | 7.8935   | -1.0889 | Down | 8.04E-05  | 1.56E-04  |
| Unigene33189  | Potri.001G089500.2  | 6.1121   | 13.0011  | -1.0889 | Down | 2.30E-08  | 5.95E-08  |
| Unigene25825  | Potri.002G220200.1  | 106.8857 | 227.3805 | -1.089  | Down | 5.70E-112 | 1.41E-110 |
| Unigene22959  | Potri.010G094700.1  | 35.67    | 75.8837  | -1.0891 | Down | 2.68E-36  | 1.92E-35  |
| Unigene42627  | Potri.008G151300.2  | 12.7064  | 27.032   | -1.0891 | Down | 8.19E-40  | 6.39E-39  |
| Unigene2442   | Potri.013G108200.1  | 3.2399   | 6.8931   | -1.0892 | Down | 4.89E-12  | 1.55E-11  |
| Unigene25029  | Potri.009G023200.5  | 8.74     | 18.5946  | -1.0892 | Down | 4.83E-19  | 2.08E-18  |
| Unigene7791   | Potri.003G188500.1  | 10.1068  | 21.5037  | -1.0893 | Down | 4.11E-47  | 3.79E-46  |
| Unigene51403  | Potri.017G084500.1  | 13.5225  | 28.7731  | -1.0894 | Down | 3.95E-12  | 1.26E-11  |
| Unigene3570   | Potri.005G196300.2  | 6.431    | 13.6838  | -1.0894 | Down | 6.44E-05  | 1.26E-04  |
| Unigene30322  | Potri.002G138000.1  | 4.4272   | 9.4203   | -1.0894 | Down | 6.44E-05  | 1.26E-04  |
| Unigene25260  | Potri.016G028000.1  | 59.87    | 127.4054 | -1.0895 | Down | 2.37E-51  | 2.38E-50  |
| Unigene2896   | Potri.016G136500.1  | 3.1406   | 6.6836   | -1.0896 | Down | 1.21E-08  | 3.17E-08  |
| Unigene48258  | Potri.010G234800.1  | 32.2205  | 68.5714  | -1.0896 | Down | 1.67E-19  | 7.32E-19  |
| Unigene28244  | Potri.001G367200.1  | 23.4421  | 49.8894  | -1.0896 | Down | 1.67E-19  | 7.32E-19  |
| Unigene19976  | Potri.003G217200.1  | 27.1421  | 57.7662  | -1.0897 | Down | 5.82E-16  | 2.21E-15  |
| Unigene33591  | Potri.016G054800.1  | 1.7782   | 3.7849   | -1.0898 | Down | 5.17E-05  | 1.02E-04  |
| Unigene15891  | Potri.008G085800.2  | 4.8395   | 10.3006  | -1.0898 | Down | 5.17E-05  | 1.02E-04  |
| Unigene49529  | Potri.001G139400.3  | 27.353   | 58.2195  | -1.0898 | Down | 2.29E-41  | 1.86E-40  |
| Unigene19760  | Potri.001G049800.2  | 4.1221   | 8.7736   | -1.0898 | Down | 5.17E-05  | 1.02E-04  |
| Unigene100863 | Potri.017G146200.1  | 10.9673  | 23.3462  | -1.09   | Down | 7.18E-20  | 3.18E-19  |
| Unigene11973  | Potri.014G110200.2  | 23.7534  | 50.5655  | -1.09   | Down | 1.38E-23  | 6.92E-23  |
| Unigene6744   | Potri.003G098800.1  | 47.1015  | 100.2761 | -1.0901 | Down | 1.74E-49  | 1.68E-48  |
| Unigene18419  | Potri.014G022400.3  | 10.4957  | 22.3451  | -1.0902 | Down | 9.07E-24  | 4.56E-23  |
| Unigene1429   | Potri.011G145300.2  | 11.9222  | 25.3833  | -1.0902 | Down | 3.81E-20  | 1.70E-19  |
| Unigene104829 | Potri.010G175500.11 | 2.2158   | 4.7176   | -1.0902 | Down | 4.15E-05  | 8.27E-05  |
| Unigene8778   | Potri.005G122300.1  | 6.2166   | 13.2356  | -1.0902 | Down | 4.15E-05  | 8.27E-05  |
| Unigene37057  | Potri.012G119600.3  | 55.2208  | 117.5731 | -1.0903 | Down | 4.56E-35  | 3.16E-34  |
| Unigene34889  | Potri.008G096800.1  | 7.0118   | 14.9298  | -1.0903 | Down | 1.86E-31  | 1.17E-30  |
| Unigene99410  | Potri.011G006700.2  | 2.079    | 4.427    | -1.0904 | Down | 5.10E-09  | 1.38E-08  |
| Unigene46367  | Potri.010G226800.1  | 12.101   | 25.7676  | -1.0904 | Down | 5.10E-09  | 1.38E-08  |
| Unigene116203 | Potri.010G099300.1  | 10.1944  | 21.7078  | -1.0904 | Down | 5.10E-09  | 1.38E-08  |
| Unigene1153   | Potri.005G061100.1  | 9.8177   | 20.9046  | -1.0904 | Down | 1.98E-46  | 1.79E-45  |
| Unigene47735  | Potri.016G097300.1  | 5.7694   | 12.2868  | -1.0906 | Down | 3.33E-05  | 6.69E-05  |
| Unigene37332  | Potri.014G125500.3  | 5.7078   | 12.1557  | -1.0906 | Down | 3.33E-05  | 6.69E-05  |
| Unigene49136  | Potri.014G112600.1  | 3.2666   | 6.9567   | -1.0906 | Down | 3.33E-05  | 6.69E-05  |

|               |                    |         |          |         |      |          |          |
|---------------|--------------------|---------|----------|---------|------|----------|----------|
| Unigene33950  | Potri.010G228000.3 | 1.8205  | 3.8771   | -1.0906 | Down | 3.33E-05 | 6.69E-05 |
| Unigene27584  | Potri.002G247400.2 | 12.2123 | 26.0082  | -1.0906 | Down | 5.79E-13 | 1.93E-12 |
| Unigene6509   | Potri.006G217600.1 | 18.4366 | 39.2667  | -1.0907 | Down | 6.97E-17 | 2.75E-16 |
| Unigene84823  | Potri.001G420900.1 | 51.4522 | 109.5831 | -1.0907 | Down | 5.56E-36 | 3.95E-35 |
| Unigene17388  | Potri.001G343400.1 | 24.1727 | 51.4819  | -1.0907 | Down | 2.65E-28 | 1.53E-27 |
| Unigene113673 | Potri.010G027800.1 | 31.6612 | 67.4426  | -1.0909 | Down | 5.67E-21 | 2.61E-20 |
| Unigene19608  | Potri.009G032000.1 | 20.957  | 44.6387  | -1.0909 | Down | 7.01E-21 | 3.21E-20 |
| Unigene52788  | Potri.008G078200.2 | 26.3503 | 56.1297  | -1.0909 | Down | 5.67E-21 | 2.61E-20 |
| Unigene6573   | Potri.012G107400.1 | 15.3535 | 32.7089  | -1.0911 | Down | 2.98E-17 | 1.20E-16 |
| Unigene5001   | Potri.010G208000.2 | 17.2251 | 36.6969  | -1.0911 | Down | 2.47E-13 | 8.37E-13 |
| Unigene29889  | Potri.009G056500.2 | 16.9963 | 36.2081  | -1.0911 | Down | 3.72E-21 | 1.72E-20 |
| Unigene34992  | Potri.005G010800.2 | 7.0459  | 15.0105  | -1.0911 | Down | 2.98E-17 | 1.20E-16 |
| Unigene7891   | Potri.008G060900.3 | 12.2681 | 26.1382  | -1.0912 | Down | 2.43E-21 | 1.13E-20 |
| Unigene72180  | Potri.019G079500.1 | 32.5918 | 69.4463  | -1.0914 | Down | 1.58E-17 | 6.40E-17 |
| Unigene41626  | Potri.008G069700.6 | 14.821  | 31.5804  | -1.0914 | Down | 1.58E-17 | 6.40E-17 |
| Unigene15357  | Potri.004G183600.1 | 2.197   | 4.6813   | -1.0914 | Down | 2.14E-05 | 4.39E-05 |
| Unigene32398  | Potri.002G159300.5 | 7.7787  | 16.5748  | -1.0914 | Down | 1.92E-37 | 1.41E-36 |
| Unigene40031  | Potri.010G025900.2 | 8.5959  | 18.3179  | -1.0915 | Down | 1.04E-21 | 4.92E-21 |
| Unigene52728  | Potri.016G110100.3 | 10.7074 | 22.8181  | -1.0916 | Down | 1.41E-09 | 3.92E-09 |
| Unigene39730  | Potri.018G143900.2 | 15.5626 | 33.1687  | -1.0917 | Down | 6.77E-18 | 2.78E-17 |
| Unigene40901  | Potri.017G038800.3 | 15.7411 | 33.5491  | -1.0917 | Down | 1.13E-09 | 3.18E-09 |
| Unigene49200  | Potri.016G114600.1 | 3.9534  | 8.4259   | -1.0917 | Down | 1.72E-05 | 3.55E-05 |
| Unigene20773  | Potri.016G060200.4 | 17.508  | 37.3148  | -1.0917 | Down | 6.77E-18 | 2.78E-17 |
| Unigene48946  | Potri.007G064000.1 | 18.7727 | 40.0086  | -1.0917 | Down | 6.84E-22 | 3.24E-21 |
| Unigene2848   | Potri.010G086700.1 | 34.5505 | 73.6392  | -1.0918 | Down | 1.54E-50 | 1.52E-49 |
| Unigene32712  | Potri.017G080300.1 | 9.5698  | 20.3995  | -1.092  | Down | 8.16E-39 | 6.22E-38 |
| Unigene8995   | Potri.009G053200.1 | 31.0608 | 66.2126  | -1.092  | Down | 2.38E-22 | 1.14E-21 |
| Unigene90150  | Potri.004G087000.2 | 18.6498 | 39.7554  | -1.092  | Down | 3.58E-18 | 1.49E-17 |
| Unigene50092  | Potri.004G101100.3 | 7.716   | 16.449   | -1.0921 | Down | 1.93E-22 | 9.27E-22 |
| Unigene49781  | Potri.001G325000.1 | 5.6369  | 12.0168  | -1.0921 | Down | 1.38E-05 | 2.89E-05 |
| Unigene35739  | Potri.018G113100.1 | 15.8441 | 33.784   | -1.0924 | Down | 4.81E-10 | 1.38E-09 |
| Unigene39261  | Potri.019G048200.5 | 14.982  | 31.9472  | -1.0925 | Down | 5.42E-23 | 2.66E-22 |
| Unigene48772  | Potri.010G070900.1 | 51.3379 | 109.4761 | -1.0925 | Down | 2.48E-57 | 2.81E-56 |
| Unigene20029  | Potri.010G254400.1 | 12.0201 | 25.6331  | -1.0926 | Down | 3.88E-10 | 1.12E-09 |
| Unigene44333  | Potri.006G271500.1 | 1.8222  | 3.8863   | -1.0927 | Down | 8.91E-06 | 1.89E-05 |
| Unigene59328  | Potri.006G245800.1 | 2.8292  | 6.034    | -1.0927 | Down | 8.91E-06 | 1.89E-05 |
| Unigene11210  | Potri.005G240000.3 | 8.5008  | 18.1301  | -1.0927 | Down | 5.33E-19 | 2.29E-18 |
| Unigene17160  | Potri.014G047600.1 | 8.2425  | 17.581   | -1.0929 | Down | 2.53E-10 | 7.35E-10 |
| Unigene24669  | Potri.006G138500.1 | 17.6682 | 37.6856  | -1.0929 | Down | 2.53E-10 | 7.35E-10 |

|               |                    |         |          |         |      |           |           |
|---------------|--------------------|---------|----------|---------|------|-----------|-----------|
| Unigene40193  | Potri.013G001300.1 | 8.0042  | 17.0744  | -1.093  | Down | 2.04E-10  | 5.97E-10  |
| Unigene2204   | Potri.010G023500.4 | 6.1147  | 13.0437  | -1.093  | Down | 2.04E-10  | 5.97E-10  |
| Unigene33698  | Potri.006G203700.2 | 7.6906  | 16.4055  | -1.093  | Down | 2.04E-10  | 5.97E-10  |
| Unigene32324  | Potri.005G081500.2 | 7.2356  | 15.4349  | -1.093  | Down | 2.28E-19  | 9.93E-19  |
| Unigene53014  | Potri.003G110100.5 | 6.2583  | 13.3501  | -1.093  | Down | 7.16E-06  | 1.54E-05  |
| Unigene11464  | Potri.013G079800.1 | 12.757  | 27.2149  | -1.0931 | Down | 3.43E-55  | 3.72E-54  |
| Unigene48078  | Potri.006G091000.7 | 31.6576 | 67.5382  | -1.0932 | Down | 1.49E-19  | 6.55E-19  |
| Unigene38495  | Potri.018G110100.1 | 3.0731  | 6.5569   | -1.0933 | Down | 5.75E-06  | 1.24E-05  |
| Unigene7695   | Potri.010G041800.1 | 5.67    | 12.0975  | -1.0933 | Down | 1.33E-10  | 3.93E-10  |
| Unigene43487  | Potri.002G110900.4 | 2.449   | 5.2261   | -1.0935 | Down | 4.62E-06  | 1.01E-05  |
| Unigene92620  | Potri.005G154500.1 | 11.8508 | 25.2897  | -1.0936 | Down | 1.86E-15  | 6.90E-15  |
| Unigene109639 | Potri.001G379800.1 | 17.959  | 38.3248  | -1.0936 | Down | 8.68E-11  | 2.59E-10  |
| Unigene9226   | Potri.004G040100.2 | 30.0111 | 64.05    | -1.0937 | Down | 2.75E-20  | 1.24E-19  |
| Unigene20510  | Potri.008G009100.1 | 3.7229  | 7.9462   | -1.0938 | Down | 5.66E-11  | 1.70E-10  |
| Unigene13668  | Potri.003G155100.2 | 12.5123 | 26.7049  | -1.0938 | Down | 1.94E-62  | 2.41E-61  |
| Unigene28153  | Potri.001G160700.1 | 4.2061  | 8.9775   | -1.0938 | Down | 3.72E-06  | 8.19E-06  |
| Unigene15442  | Potri.017G090100.4 | 52.387  | 111.8262 | -1.094  | Down | 5.54E-35  | 3.84E-34  |
| Unigene36910  | Potri.008G172100.1 | 20.7867 | 44.3712  | -1.094  | Down | 1.18E-20  | 5.37E-20  |
| Unigene68999  | Potri.017G088500.1 | 2.6643  | 5.6876   | -1.0941 | Down | 2.99E-06  | 6.62E-06  |
| Unigene44172  | Potri.008G088600.2 | 13.2512 | 28.2883  | -1.0941 | Down | 3.69E-11  | 1.12E-10  |
| Unigene25962  | Potri.004G066700.2 | 6.8277  | 14.5757  | -1.0941 | Down | 2.99E-06  | 6.62E-06  |
| Unigene44995  | Potri.005G173500.1 | 2.7545  | 5.8808   | -1.0942 | Down | 2.98E-11  | 9.10E-11  |
| Unigene16235  | Potri.003G223000.3 | 9.6768  | 20.6613  | -1.0943 | Down | 2.40E-06  | 5.36E-06  |
| Unigene66687  | Potri.002G233700.3 | 8.8808  | 18.9619  | -1.0943 | Down | 2.40E-06  | 5.36E-06  |
| Unigene9015   | Potri.001G356100.1 | 2.6922  | 5.7483   | -1.0943 | Down | 2.40E-06  | 5.36E-06  |
| Unigene15336  | Potri.016G143700.4 | 23.365  | 49.8903  | -1.0944 | Down | 2.22E-16  | 8.59E-16  |
| Unigene2428   | Potri.013G075100.1 | 15.6666 | 33.4512  | -1.0944 | Down | 5.47E-36  | 3.89E-35  |
| Unigene45354  | Potri.009G108500.1 | 8.4967  | 18.1428  | -1.0944 | Down | 2.71E-26  | 1.47E-25  |
| Unigene32216  | Potri.007G081100.1 | 19.4097 | 41.4474  | -1.0945 | Down | 3.75E-56  | 4.15E-55  |
| Unigene6026   | Potri.005G042700.1 | 13.0896 | 27.9549  | -1.0947 | Down | 1.27E-11  | 3.95E-11  |
| Unigene42959  | Potri.001G316700.1 | 10.3179 | 22.0355  | -1.0947 | Down | 9.32E-22  | 4.40E-21  |
| Unigene90158  | Potri.004G064400.1 | 45.5773 | 97.347   | -1.0948 | Down | 2.46E-42  | 2.04E-41  |
| Unigene76341  | Potri.001G160700.5 | 56.5295 | 120.7342 | -1.0948 | Down | 5.16E-32  | 3.32E-31  |
| Unigene75312  | Potri.002G061400.4 | 58.662  | 125.3048 | -1.0949 | Down | 1.80E-32  | 1.17E-31  |
| Unigene629    | Potri.015G043200.2 | 24.8949 | 53.1802  | -1.095  | Down | 6.52E-105 | 1.48E-103 |
| Unigene48728  | Potri.013G079900.1 | 17.8055 | 38.0354  | -1.095  | Down | 6.68E-12  | 2.11E-11  |
| Unigene44535  | Potri.011G057100.1 | 4.0286  | 8.6058   | -1.095  | Down | 1.25E-06  | 2.85E-06  |
| Unigene32714  | Potri.007G096800.1 | 7.5647  | 16.1588  | -1.095  | Down | 3.24E-22  | 1.55E-21  |
| Unigene42441  | Potri.003G050600.2 | 11.8294 | 25.2685  | -1.095  | Down | 1.87E-68  | 2.56E-67  |

|               |                    |          |          |         |      |           |           |
|---------------|--------------------|----------|----------|---------|------|-----------|-----------|
| Unigene19501  | Potri.001G030100.1 | 7.2841   | 15.5599  | -1.095  | Down | 1.25E-06  | 2.85E-06  |
| Unigene90908  | Potri.001G005100.1 | 32.8124  | 70.0975  | -1.0951 | Down | 6.28E-33  | 4.13E-32  |
| Unigene2694   | Potri.005G183800.1 | 2.7169   | 5.8045   | -1.0952 | Down | 1.01E-06  | 2.32E-06  |
| Unigene65105  | Potri.005G123400.1 | 7.2629   | 15.5171  | -1.0952 | Down | 1.01E-06  | 2.32E-06  |
| Unigene111441 | Potri.018G091700.2 | 9.605    | 20.5238  | -1.0954 | Down | 8.10E-07  | 1.88E-06  |
| Unigene30044  | Potri.010G150000.3 | 13.2424  | 28.2961  | -1.0954 | Down | 1.14E-17  | 4.65E-17  |
| Unigene19533  | Potri.010G100100.2 | 18.344   | 39.197   | -1.0954 | Down | 2.84E-12  | 9.15E-12  |
| Unigene16462  | Potri.001G469500.1 | 19.7178  | 42.1325  | -1.0954 | Down | 2.84E-12  | 9.15E-12  |
| Unigene6386   | Potri.007G113300.1 | 19.9662  | 42.6672  | -1.0956 | Down | 7.46E-18  | 3.06E-17  |
| Unigene55201  | Potri.005G213500.1 | 2.4413   | 5.2172   | -1.0956 | Down | 6.52E-07  | 1.52E-06  |
| Unigene44096  | Potri.005G066200.1 | 4.418    | 9.4416   | -1.0956 | Down | 6.52E-07  | 1.52E-06  |
| Unigene44057  | Potri.011G149200.2 | 8.4335   | 18.0242  | -1.0957 | Down | 1.50E-12  | 4.89E-12  |
| Unigene50058  | Potri.001G195300.1 | 5.5076   | 11.7709  | -1.0957 | Down | 1.50E-12  | 4.89E-12  |
| Unigene52877  | Potri.010G111900.1 | 5.2738   | 11.272   | -1.0958 | Down | 1.21E-12  | 3.97E-12  |
| Unigene8251   | Potri.005G100100.1 | 4.5703   | 9.7683   | -1.0958 | Down | 5.25E-07  | 1.24E-06  |
| Unigene17765  | Potri.018G064500.1 | 6.072    | 12.9797  | -1.096  | Down | 4.23E-07  | 1.00E-06  |
| Unigene20427  | Potri.018G057200.1 | 9.4183   | 20.1329  | -1.096  | Down | 7.91E-13  | 2.61E-12  |
| Unigene2103   | Potri.006G224200.2 | 6.1757   | 13.2014  | -1.096  | Down | 7.91E-13  | 2.61E-12  |
| Unigene111212 | Potri.006G061800.2 | 10.2168  | 21.8398  | -1.096  | Down | 4.23E-07  | 1.00E-06  |
| Unigene108775 | Potri.002G065000.2 | 45.6475  | 97.5926  | -1.0962 | Down | 1.33E-24  | 6.89E-24  |
| Unigene77553  | Potri.T081100.2    | 31.8332  | 68.0724  | -1.0965 | Down | 2.52E-19  | 1.09E-18  |
| Unigene47786  | Potri.014G081100.3 | 36.5646  | 78.1929  | -1.0966 | Down | 2.04E-19  | 8.87E-19  |
| Unigene2674   | Potri.009G143300.1 | 7.3358   | 15.6873  | -1.0966 | Down | 3.07E-31  | 1.93E-30  |
| Unigene27792  | Potri.002G092900.1 | 14.6273  | 31.2814  | -1.0966 | Down | 1.65E-19  | 7.20E-19  |
| Unigene11119  | Potri.001G344600.3 | 2.2652   | 4.8442   | -1.0966 | Down | 1.78E-13  | 6.07E-13  |
| Unigene34897  | Potri.018G072600.2 | 28.0196  | 59.923   | -1.0967 | Down | 1.76E-43  | 1.49E-42  |
| Unigene46563  | Potri.009G147800.4 | 2.8079   | 6.0052   | -1.0967 | Down | 1.78E-07  | 4.32E-07  |
| Unigene78214  | Potri.009G169000.1 | 32.0617  | 68.5714  | -1.0968 | Down | 1.08E-19  | 4.75E-19  |
| Unigene88760  | Potri.012G092800.1 | 15.0295  | 32.1482  | -1.0969 | Down | 7.60E-14  | 2.63E-13  |
| Unigene26444  | Potri.015G133400.1 | 56.7721  | 121.4421 | -1.097  | Down | 1.09E-38  | 8.28E-38  |
| Unigene25386  | Potri.009G036900.1 | 20.2651  | 43.3494  | -1.097  | Down | 6.14E-14  | 2.14E-13  |
| Unigene19088  | Potri.015G089100.1 | 13.7676  | 29.4551  | -1.0972 | Down | 3.24E-14  | 1.14E-13  |
| Unigene48329  | Potri.009G018800.1 | 140.2224 | 299.9922 | -1.0972 | Down | 4.00E-127 | 1.15E-125 |
| Unigene62086  | Potri.010G056200.1 | 7.2612   | 15.5361  | -1.0973 | Down | 3.61E-27  | 2.02E-26  |
| Unigene13440  | Potri.007G012200.1 | 11.4182  | 24.4305  | -1.0973 | Down | 3.61E-27  | 2.02E-26  |
| Unigene7032   | Potri.008G084800.5 | 25.2978  | 54.1296  | -1.0974 | Down | 6.89E-21  | 3.16E-20  |
| Unigene111286 | Potri.013G106000.1 | 11.6258  | 24.8766  | -1.0975 | Down | 6.03E-08  | 1.52E-07  |
| Unigene71628  | Potri.008G217300.2 | 13.3474  | 28.563   | -1.0976 | Down | 4.86E-08  | 1.23E-07  |
| Unigene39929  | Potri.006G188200.3 | 3.0254   | 6.4743   | -1.0976 | Down | 4.86E-08  | 1.23E-07  |

|              |                    |         |          |         |      |          |          |
|--------------|--------------------|---------|----------|---------|------|----------|----------|
| Unigene21083 | Potri.002G155600.2 | 15.0962 | 32.3047  | -1.0976 | Down | 1.02E-27 | 5.79E-27 |
| Unigene353   | Potri.011G090700.1 | 21.3924 | 45.7819  | -1.0977 | Down | 5.39E-61 | 6.52E-60 |
| Unigene22248 | Potri.001G456300.1 | 18.0109 | 38.5463  | -1.0977 | Down | 3.55E-28 | 2.04E-27 |
| Unigene54948 | Potri.013G056500.1 | 10.6368 | 22.7665  | -1.0978 | Down | 3.16E-08 | 8.10E-08 |
| Unigene26886 | Potri.011G156300.1 | 19.033  | 40.7357  | -1.0978 | Down | 5.92E-15 | 2.15E-14 |
| Unigene13627 | Potri.005G213100.1 | 10.4971 | 22.4675  | -1.0978 | Down | 4.79E-15 | 1.75E-14 |
| Unigene17698 | Potri.014G117900.1 | 17.2326 | 36.8873  | -1.098  | Down | 3.13E-15 | 1.15E-14 |
| Unigene10939 | Potri.004G123600.2 | 12.897  | 27.6068  | -1.098  | Down | 1.01E-35 | 7.14E-35 |
| Unigene2463  | Potri.010G140100.1 | 4.6224  | 9.8954   | -1.0981 | Down | 2.34E-22 | 1.12E-21 |
| Unigene37388 | Potri.008G069200.1 | 25.6434 | 54.8959  | -1.0981 | Down | 2.05E-15 | 7.59E-15 |
| Unigene76640 | Potri.016G068800.1 | 12.8166 | 27.4392  | -1.0982 | Down | 1.65E-08 | 4.32E-08 |
| Unigene45636 | Potri.006G039400.1 | 6.8745  | 14.7171  | -1.0982 | Down | 1.65E-15 | 6.16E-15 |
| Unigene67287 | Potri.002G247400.1 | 3.73    | 7.9855   | -1.0982 | Down | 1.65E-08 | 4.32E-08 |
| Unigene42812 | Potri.017G047600.1 | 37.0918 | 79.419   | -1.0984 | Down | 1.21E-65 | 1.58E-64 |
| Unigene49692 | Potri.010G195900.2 | 3.7681  | 8.0679   | -1.0984 | Down | 1.33E-08 | 3.50E-08 |
| Unigene50014 | Potri.009G006800.1 | 9.6906  | 20.7492  | -1.0984 | Down | 3.43E-30 | 2.09E-29 |
| Unigene1060  | Potri.005G058000.2 | 3.6726  | 7.8639   | -1.0984 | Down | 5.72E-16 | 2.17E-15 |
| Unigene49564 | Potri.010G111900.1 | 8.9474  | 19.1588  | -1.0985 | Down | 5.72E-16 | 2.17E-15 |
| Unigene433   | Potri.002G071800.3 | 5.0507  | 10.8152  | -1.0985 | Down | 4.63E-16 | 1.77E-15 |
| Unigene25130 | Potri.007G004600.1 | 13.4878 | 28.8831  | -1.0986 | Down | 8.67E-09 | 2.30E-08 |
| Unigene24522 | Potri.013G116800.1 | 25.0702 | 53.6901  | -1.0987 | Down | 4.17E-31 | 2.61E-30 |
| Unigene29653 | Potri.018G079800.6 | 23.3297 | 49.9681  | -1.0988 | Down | 1.18E-31 | 7.49E-31 |
| Unigene45790 | Potri.007G005300.1 | 11.9072 | 25.5021  | -1.0988 | Down | 5.64E-09 | 1.51E-08 |
| Unigene18361 | Potri.016G094100.1 | 8.6376  | 18.5011  | -1.0989 | Down | 1.81E-39 | 1.40E-38 |
| Unigene23959 | Potri.001G452300.2 | 3.8303  | 8.2041   | -1.0989 | Down | 4.55E-09 | 1.23E-08 |
| Unigene88827 | Potri.001G253900.1 | 27.5645 | 59.0404  | -1.0989 | Down | 2.77E-24 | 1.42E-23 |
| Unigene32386 | Potri.015G071900.1 | 9.7671  | 20.9212  | -1.099  | Down | 1.81E-24 | 9.34E-24 |
| Unigene50648 | Potri.002G238600.2 | 8.6981  | 18.6318  | -1.099  | Down | 6.85E-17 | 2.71E-16 |
| Unigene42412 | Potri.005G253800.5 | 4.8769  | 10.4472  | -1.0991 | Down | 1.43E-32 | 9.34E-32 |
| Unigene20479 | Potri.004G102400.5 | 5.1172  | 10.9625  | -1.0992 | Down | 3.63E-17 | 1.45E-16 |
| Unigene25227 | Potri.019G042800.1 | 15.4828 | 33.1717  | -1.0993 | Down | 1.92E-09 | 5.32E-09 |
| Unigene18481 | Potri.004G196100.1 | 2.803   | 6.0055   | -1.0993 | Down | 1.92E-09 | 5.32E-09 |
| Unigene91740 | Potri.008G120100.2 | 45.4935 | 97.4744  | -1.0994 | Down | 1.48E-49 | 1.43E-48 |
| Unigene42035 | Potri.001G085600.1 | 12.3407 | 26.4416  | -1.0994 | Down | 1.55E-09 | 4.31E-09 |
| Unigene2604  | Potri.010G122000.2 | 6.5502  | 14.0354  | -1.0995 | Down | 8.22E-18 | 3.37E-17 |
| Unigene7763  | Potri.004G005700.1 | 7.3216  | 15.6884  | -1.0995 | Down | 8.22E-18 | 3.37E-17 |
| Unigene6861  | Potri.006G040000.2 | 18.1511 | 38.8958  | -1.0996 | Down | 5.38E-18 | 2.22E-17 |
| Unigene38878 | Potri.019G020700.1 | 19.488  | 41.7655  | -1.0997 | Down | 2.31E-18 | 9.65E-18 |
| Unigene4198  | Potri.015G084000.3 | 49.298  | 105.6618 | -1.0999 | Down | 1.11E-35 | 7.85E-35 |

|               |                    |         |          |         |      |           |           |
|---------------|--------------------|---------|----------|---------|------|-----------|-----------|
| Unigene109401 | Potri.010G115700.2 | 16.5582 | 35.4907  | -1.0999 | Down | 4.29E-10  | 1.23E-09  |
| Unigene42344  | Potri.014G088500.1 | 10.4267 | 22.3508  | -1.1    | Down | 2.79E-10  | 8.10E-10  |
| Unigene46771  | Potri.002G020900.4 | 56.8936 | 121.9545 | -1.1    | Down | 4.83E-45  | 4.24E-44  |
| Unigene12388  | Potri.016G017900.1 | 16.3186 | 34.9827  | -1.1001 | Down | 2.77E-19  | 1.20E-18  |
| Unigene86205  | Potri.004G003800.1 | 60.5026 | 129.6947 | -1.1001 | Down | 2.57E-45  | 2.27E-44  |
| Unigene118061 | Potri.003G040200.1 | 9.0479  | 19.3963  | -1.1001 | Down | 2.25E-10  | 6.56E-10  |
| Unigene119552 | Potri.001G359300.6 | 2.8466  | 6.1021   | -1.1001 | Down | 2.79E-10  | 8.10E-10  |
| Unigene41333  | Potri.002G202300.1 | 95.7234 | 205.2177 | -1.1002 | Down | 4.53E-144 | 1.54E-142 |
| Unigene39360  | Potri.002G078800.1 | 6.1147  | 13.1096  | -1.1003 | Down | 1.47E-10  | 4.32E-10  |
| Unigene43293  | Potri.009G116200.1 | 25.0807 | 53.7757  | -1.1004 | Down | 2.52E-47  | 2.33E-46  |
| Unigene42909  | Potri.004G121200.3 | 5.0525  | 10.8335  | -1.1004 | Down | 9.57E-11  | 2.85E-10  |
| Unigene28     | Potri.012G067800.2 | 2.9898  | 6.4109   | -1.1005 | Down | 7.73E-11  | 2.31E-10  |
| Unigene59918  | Potri.010G209500.1 | 3.6705  | 7.8713   | -1.1006 | Down | 5.04E-11  | 1.52E-10  |
| Unigene88206  | Potri.T159900.1    | 60.3142 | 129.3499 | -1.1007 | Down | 1.32E-49  | 1.27E-48  |
| Unigene4463   | Potri.004G133700.5 | 16.29   | 34.9365  | -1.1007 | Down | 3.29E-11  | 1.00E-10  |
| Unigene54303  | Potri.001G368600.1 | 6.1015  | 13.085   | -1.1007 | Down | 4.07E-11  | 1.24E-10  |
| Unigene27788  | Potri.T057800.1    | 9.4799  | 20.3312  | -1.1008 | Down | 3.29E-11  | 1.00E-10  |
| Unigene45645  | Potri.012G120400.1 | 11.3981 | 24.4457  | -1.1008 | Down | 8.64E-31  | 5.36E-30  |
| Unigene94710  | Potri.001G017600.1 | 16.9543 | 36.366   | -1.1009 | Down | 1.73E-11  | 5.35E-11  |
| Unigene53446  | Potri.006G183600.1 | 10.1229 | 21.7138  | -1.101  | Down | 1.13E-21  | 5.32E-21  |
| Unigene71488  | Potri.003G105000.5 | 20.3953 | 43.7484  | -1.101  | Down | 1.40E-11  | 4.34E-11  |
| Unigene17756  | Potri.018G058300.1 | 20.8141 | 44.6502  | -1.1011 | Down | 4.85E-22  | 2.31E-21  |
| Unigene8898   | Potri.002G226600.2 | 12.1607 | 26.0929  | -1.1014 | Down | 2.53E-12  | 8.17E-12  |
| Unigene1615   | Potri.009G065800.1 | 8.725   | 18.7218  | -1.1015 | Down | 2.05E-12  | 6.63E-12  |
| Unigene34300  | Potri.011G143900.2 | 14.5164 | 31.151   | -1.1016 | Down | 8.14E-35  | 5.60E-34  |
| Unigene38060  | Potri.003G109400.1 | 16.5626 | 35.5429  | -1.1016 | Down | 1.08E-12  | 3.54E-12  |
| Unigene27977  | Potri.016G087200.1 | 15.1378 | 32.4874  | -1.1017 | Down | 7.05E-13  | 2.33E-12  |
| Unigene30769  | Potri.015G029800.2 | 37.3954 | 80.2671  | -1.1019 | Down | 6.42E-37  | 4.68E-36  |
| Unigene5136   | Potri.009G005700.1 | 33.2986 | 71.4713  | -1.1019 | Down | 5.62E-25  | 2.94E-24  |
| Unigene10763  | Potri.004G137000.2 | 29.0307 | 62.3113  | -1.1019 | Down | 5.22E-60  | 6.21E-59  |
| Unigene27868  | Potri.002G150000.1 | 9.271   | 19.899   | -1.1019 | Down | 3.00E-13  | 1.01E-12  |
| Unigene43683  | Potri.009G041200.1 | 12.7647 | 27.399   | -1.102  | Down | 2.33E-72  | 3.40E-71  |
| Unigene7980   | Potri.011G050400.4 | 17.9716 | 38.5778  | -1.1021 | Down | 1.28E-25  | 6.83E-25  |
| Unigene41919  | Potri.005G117400.3 | 34.6042 | 74.2817  | -1.1021 | Down | 1.19E-37  | 8.83E-37  |
| Unigene49936  | Potri.019G037600.3 | 7.0229  | 15.0765  | -1.1022 | Down | 8.37E-14  | 2.90E-13  |
| Unigene46751  | Potri.008G147100.3 | 18.9964 | 40.7828  | -1.1022 | Down | 5.47E-14  | 1.91E-13  |
| Unigene27061  | Potri.006G020900.1 | 13.0358 | 27.9861  | -1.1022 | Down | 5.47E-14  | 1.91E-13  |
| Unigene29714  | Potri.016G065200.1 | 7.6761  | 16.4818  | -1.1024 | Down | 1.89E-14  | 6.72E-14  |
| Unigene47166  | Potri.006G225900.1 | 64.8156 | 139.166  | -1.1024 | Down | 5.01E-40  | 3.93E-39  |



|              |                     |          |          |         |      |          |          |
|--------------|---------------------|----------|----------|---------|------|----------|----------|
| Unigene48136 | Potri.004G217000.3  | 90.7684  | 194.8883 | -1.1024 | Down | 6.76E-91 | 1.28E-89 |
| Unigene25889 | Potri.003G154300.3  | 8.9716   | 19.2651  | -1.1026 | Down | 8.07E-15 | 2.92E-14 |
| Unigene2839  | Potri.011G152600.2  | 14.2161  | 30.5306  | -1.1027 | Down | 4.22E-29 | 2.50E-28 |
| Unigene47356 | Potri.007G107400.1  | 5.8365   | 12.5345  | -1.1027 | Down | 2.79E-15 | 1.03E-14 |
| Unigene25983 | Potri.012G063500.2  | 21.4713  | 46.1166  | -1.1029 | Down | 9.64E-16 | 3.62E-15 |
| Unigene7549  | Potri.012G143800.1  | 7.2178   | 15.5041  | -1.103  | Down | 3.33E-16 | 1.28E-15 |
| Unigene32654 | Potri.003G194000.5  | 13.1823  | 28.3157  | -1.103  | Down | 3.11E-45 | 2.74E-44 |
| Unigene36622 | Potri.014G036400.1  | 44.6238  | 95.86    | -1.1031 | Down | 1.76E-31 | 1.11E-30 |
| Unigene7953  | Potri.008G043400.2  | 4.911    | 10.5494  | -1.1031 | Down | 2.18E-16 | 8.43E-16 |
| Unigene26202 | Potri.010G027800.1  | 36.4321  | 78.2677  | -1.1032 | Down | 4.02E-32 | 2.59E-31 |
| Unigene11628 | Potri.010G241800.1  | 8.9708   | 19.2731  | -1.1033 | Down | 3.99E-17 | 1.59E-16 |
| Unigene7708  | Potri.008G172800.1  | 33.6745  | 72.3539  | -1.1034 | Down | 1.27E-65 | 1.67E-64 |
| Unigene3963  | Potri.004G166900.1  | 19.2015  | 41.2552  | -1.1034 | Down | 2.11E-17 | 8.52E-17 |
| Unigene82405 | Potri.002G245400.2  | 24.8664  | 53.4263  | -1.1034 | Down | 2.11E-17 | 8.52E-17 |
| Unigene76755 | Potri.001G368000.14 | 116.1708 | 249.6085 | -1.1034 | Down | 1.03E-65 | 1.36E-64 |
| Unigene38888 | Potri.001G200500.1  | 9.8751   | 21.2173  | -1.1034 | Down | 1.71E-17 | 6.92E-17 |
| Unigene3010  | Potri.018G052200.1  | 29.5288  | 63.4591  | -1.1037 | Down | 2.33E-53 | 2.44E-52 |
| Unigene37762 | Potri.016G102100.1  | 16.2544  | 34.9316  | -1.1037 | Down | 7.12E-19 | 3.04E-18 |
| Unigene7664  | Potri.004G177400.5  | 12.3474  | 26.5361  | -1.1037 | Down | 4.66E-19 | 2.00E-18 |
| Unigene38472 | Potri.003G106700.2  | 6.6821   | 14.36    | -1.1037 | Down | 8.80E-19 | 3.74E-18 |
| Unigene39844 | Potri.014G041600.1  | 7.7808   | 16.7222  | -1.1038 | Down | 3.05E-19 | 1.32E-18 |
| Unigene44277 | Potri.001G370900.1  | 9.1814   | 19.732   | -1.1038 | Down | 4.66E-19 | 2.00E-18 |
| Unigene96201 | Potri.008G147100.3  | 12.2313  | 26.29    | -1.1039 | Down | 5.61E-20 | 2.49E-19 |
| Unigene39478 | Potri.018G032300.2  | 12.5554  | 26.9876  | -1.104  | Down | 5.57E-39 | 4.26E-38 |
| Unigene32335 | Potri.T063200.1     | 5.3897   | 11.5861  | -1.1041 | Down | 4.42E-21 | 2.04E-20 |
| Unigene18046 | Potri.013G044600.1  | 9.9529   | 21.3947  | -1.1041 | Down | 1.03E-20 | 4.70E-20 |
| Unigene486   | Potri.014G129200.1  | 9.1661   | 19.7049  | -1.1042 | Down | 5.44E-41 | 4.37E-40 |
| Unigene20530 | Potri.012G077700.4  | 22.4412  | 48.2443  | -1.1042 | Down | 1.54E-21 | 7.20E-21 |
| Unigene9759  | Potri.001G071900.2  | 29.4612  | 63.3354  | -1.1042 | Down | 1.90E-21 | 8.86E-21 |
| Unigene32455 | Potri.008G021100.2  | 7.1888   | 15.4558  | -1.1043 | Down | 2.29E-22 | 1.10E-21 |
| Unigene5926  | Potri.001G451300.1  | 27.8187  | 59.8074  | -1.1043 | Down | 3.53E-42 | 2.91E-41 |
| Unigene780   | Potri.015G041500.1  | 7.2243   | 15.5327  | -1.1044 | Down | 1.41E-64 | 1.82E-63 |
| Unigene20401 | Potri.008G216800.2  | 28.4069  | 61.0762  | -1.1044 | Down | 1.50E-22 | 7.26E-22 |
| Unigene43340 | Potri.014G142900.1  | 4.5699   | 9.8274   | -1.1046 | Down | 1.16E-24 | 6.03E-24 |
| Unigene4102  | Potri.008G045200.5  | 26.7145  | 57.454   | -1.1048 | Down | 9.24E-26 | 4.95E-25 |
| Unigene25948 | Potri.019G018500.5  | 30.2517  | 65.0673  | -1.1049 | Down | 4.81E-27 | 2.68E-26 |
| Unigene15949 | Potri.002G105900.2  | 27.4117  | 58.9594  | -1.1049 | Down | 3.90E-27 | 2.18E-26 |
| Unigene9405  | Potri.018G002900.1  | 31.083   | 66.8637  | -1.1051 | Down | 5.73E-29 | 3.38E-28 |
| Unigene11281 | Potri.018G064100.1  | 15.8895  | 34.1859  | -1.1053 | Down | 8.32E-32 | 5.32E-31 |

|               |                    |         |         |         |      |          |          |
|---------------|--------------------|---------|---------|---------|------|----------|----------|
| Unigene39561  | Potri.013G012100.1 | 10.6235 | 22.8591 | -1.1055 | Down | 1.21E-34 | 8.33E-34 |
| Unigene8307   | Potri.008G105300.6 | 27.0657 | 58.2468 | -1.1057 | Down | 2.67E-38 | 2.01E-37 |
| Unigene24278  | Potri.014G037800.1 | 8.8088  | 18.9586 | -1.1058 | Down | 5.97E-41 | 4.80E-40 |
| Unigene34422  | Potri.001G338400.2 | 45.818  | 98.6167 | -1.1059 | Down | 2.09E-84 | 3.64E-83 |
| Unigene43479  | Potri.006G061700.5 | 29.1292 | 62.7017 | -1.106  | Down | 1.60E-46 | 1.45E-45 |
| Unigene21601  | Potri.013G157000.1 | 16.4742 | 35.4617 | -1.1061 | Down | 6.91E-47 | 6.32E-46 |
| Unigene33968  | Potri.019G090500.1 | 38.0656 | 81.9575 | -1.1064 | Down | 1.42E-60 | 1.70E-59 |
| Unigene42456  | Potri.018G034700.2 | 7.6676  | 16.5098 | -1.1065 | Down | 2.55E-66 | 3.39E-65 |
| Unigene50124  | Potri.001G304600.1 | 29.4426 | 63.3952 | -1.1065 | Down | 3.17E-65 | 4.13E-64 |
| Unigene119461 | Potri.019G054000.1 | 3.8397  | 8.2734  | -1.1075 | Down | 3.26E-09 | 8.88E-09 |
| Unigene39175  | Potri.019G034200.1 | 20.8568 | 44.9409 | -1.1075 | Down | 6.33E-19 | 2.71E-18 |
| Unigene1567   | Potri.018G149900.2 | 3.4197  | 7.3684  | -1.1075 | Down | 2.14E-06 | 4.78E-06 |
| Unigene21158  | Potri.018G113100.1 | 26.0308 | 56.0893 | -1.1075 | Down | 8.75E-23 | 4.27E-22 |
| Unigene41158  | Potri.018G090700.2 | 5.0938  | 10.9757 | -1.1075 | Down | 3.39E-04 | 6.13E-04 |
| Unigene112084 | Potri.018G064700.3 | 4.5259  | 9.7521  | -1.1075 | Down | 5.30E-04 | 9.38E-04 |
| Unigene10703  | Potri.018G058300.1 | 10.8923 | 23.47   | -1.1075 | Down | 2.14E-20 | 9.65E-20 |
| Unigene27831  | Potri.018G001000.1 | 6.2509  | 13.4691 | -1.1075 | Down | 7.25E-10 | 2.05E-09 |
| Unigene102465 | Potri.017G109500.1 | 2.8939  | 6.2356  | -1.1075 | Down | 1.11E-04 | 2.12E-04 |
| Unigene11441  | Potri.017G109000.1 | 9.2443  | 19.9189 | -1.1075 | Down | 2.32E-17 | 9.36E-17 |
| Unigene28841  | Potri.017G099200.2 | 4.3494  | 9.3718  | -1.1075 | Down | 1.58E-07 | 3.86E-07 |
| Unigene16621  | Potri.017G060100.1 | 7.4905  | 16.14   | -1.1075 | Down | 6.36E-06 | 1.37E-05 |
| Unigene114122 | Potri.017G057700.3 | 16.3274 | 35.181  | -1.1075 | Down | 3.45E-12 | 1.11E-11 |
| Unigene51884  | Potri.016G092200.1 | 2.8151  | 6.0657  | -1.1075 | Down | 1.11E-04 | 2.12E-04 |
| Unigene6496   | Potri.016G091800.3 | 5.2697  | 11.3548 | -1.1075 | Down | 2.44E-07 | 5.87E-07 |
| Unigene59793  | Potri.016G041000.1 | 3.5853  | 7.7253  | -1.1075 | Down | 1.11E-06 | 2.55E-06 |
| Unigene17223  | Potri.016G024900.2 | 3.0757  | 6.6272  | -1.1075 | Down | 1.72E-06 | 3.89E-06 |
| Unigene22112  | Potri.015G145300.1 | 14.3341 | 30.8861 | -1.1075 | Down | 1.07E-35 | 7.52E-35 |
| Unigene23229  | Potri.015G108600.4 | 5.0405  | 10.8609 | -1.1075 | Down | 5.80E-07 | 1.36E-06 |
| Unigene31032  | Potri.015G094000.1 | 4.1819  | 9.0108  | -1.1075 | Down | 3.76E-07 | 8.93E-07 |
| Unigene50358  | Potri.015G066500.1 | 4.135   | 8.9098  | -1.1075 | Down | 6.36E-06 | 1.37E-05 |
| Unigene19597  | Potri.015G012700.5 | 9.6733  | 20.8433 | -1.1075 | Down | 2.25E-12 | 7.28E-12 |
| Unigene39534  | Potri.014G194500.1 | 10.3047 | 22.2037 | -1.1075 | Down | 4.59E-36 | 3.27E-35 |
| Unigene39798  | Potri.014G172500.1 | 5.3177  | 11.4581 | -1.1075 | Down | 6.65E-08 | 1.67E-07 |
| Unigene118843 | Potri.014G156800.1 | 3.0403  | 6.5511  | -1.1075 | Down | 3.68E-05 | 7.38E-05 |
| Unigene18301  | Potri.014G142900.1 | 13.4812 | 29.0483 | -1.1075 | Down | 1.49E-27 | 8.43E-27 |
| Unigene36008  | Potri.014G127800.2 | 11.5387 | 24.8628 | -1.1075 | Down | 2.12E-09 | 5.85E-09 |
| Unigene6701   | Potri.014G114100.1 | 7.241   | 15.6024 | -1.1075 | Down | 2.32E-17 | 9.36E-17 |
| Unigene40936  | Potri.014G076100.1 | 8.5549  | 18.4336 | -1.1075 | Down | 5.11E-06 | 1.11E-05 |
| Unigene52033  | Potri.014G068800.1 | 4.9109  | 10.5817 | -1.1075 | Down | 2.96E-05 | 5.97E-05 |

|               |                    |         |          |         |      |          |          |
|---------------|--------------------|---------|----------|---------|------|----------|----------|
| Unigene64483  | Potri.014G055800.1 | 3.9192  | 8.4447   | -1.1075 | Down | 5.30E-04 | 9.38E-04 |
| Unigene58521  | Potri.013G125700.3 | 2.9961  | 6.4558   | -1.1075 | Down | 8.26E-08 | 2.06E-07 |
| Unigene82281  | Potri.013G077900.1 | 11.1899 | 24.1111  | -1.1075 | Down | 1.19E-08 | 3.12E-08 |
| Unigene41442  | Potri.013G057700.1 | 6.5905  | 14.2008  | -1.1075 | Down | 9.86E-06 | 2.08E-05 |
| Unigene100213 | Potri.013G039600.4 | 3.2259  | 6.951    | -1.1075 | Down | 2.71E-04 | 4.95E-04 |
| Unigene97172  | Potri.013G034800.1 | 10.9586 | 23.6129  | -1.1075 | Down | 1.54E-11 | 4.77E-11 |
| Unigene10531  | Potri.012G135100.1 | 11.4251 | 24.618   | -1.1075 | Down | 3.55E-17 | 1.42E-16 |
| Unigene3412   | Potri.012G110700.1 | 6.319   | 13.6157  | -1.1075 | Down | 4.32E-08 | 1.10E-07 |
| Unigene111838 | Potri.012G110400.1 | 14.007  | 30.1813  | -1.1075 | Down | 1.11E-09 | 3.12E-09 |
| Unigene40144  | Potri.012G060800.2 | 8.4963  | 18.3073  | -1.1075 | Down | 1.68E-14 | 5.99E-14 |
| Unigene24690  | Potri.012G058100.2 | 48.882  | 105.3275 | -1.1075 | Down | 3.27E-47 | 3.02E-46 |
| Unigene37704  | Potri.012G057100.2 | 5.5353  | 11.9271  | -1.1075 | Down | 1.96E-07 | 4.76E-07 |
| Unigene27595  | Potri.012G020000.1 | 6.5109  | 14.0292  | -1.1075 | Down | 7.20E-07 | 1.68E-06 |
| Unigene50552  | Potri.012G018100.1 | 2.7292  | 5.8808   | -1.1075 | Down | 4.24E-04 | 7.56E-04 |
| Unigene7977   | Potri.011G126800.1 | 5.8919  | 12.6955  | -1.1075 | Down | 6.27E-13 | 2.08E-12 |
| Unigene103019 | Potri.011G112500.1 | 5.5334  | 11.9231  | -1.1075 | Down | 2.14E-06 | 4.78E-06 |
| Unigene21088  | Potri.011G078200.1 | 6.5395  | 14.0909  | -1.1075 | Down | 2.14E-06 | 4.78E-06 |
| Unigene97994  | Potri.011G072600.1 | 2.3374  | 5.0365   | -1.1075 | Down | 9.86E-06 | 2.08E-05 |
| Unigene91116  | Potri.011G058100.1 | 2.6577  | 5.7266   | -1.1075 | Down | 5.30E-04 | 9.38E-04 |
| Unigene48991  | Potri.010G239000.2 | 16.0965 | 34.6837  | -1.1075 | Down | 7.18E-15 | 2.60E-14 |
| Unigene25533  | Potri.010G227100.3 | 9.5477  | 20.5726  | -1.1075 | Down | 2.26E-08 | 5.85E-08 |
| Unigene13589  | Potri.010G171800.1 | 3.5664  | 7.6846   | -1.1075 | Down | 9.22E-14 | 3.18E-13 |
| Unigene105798 | Potri.010G153300.1 | 3.7744  | 8.1327   | -1.1075 | Down | 1.73E-04 | 3.24E-04 |
| Unigene3578   | Potri.010G125200.1 | 8.1658  | 17.595   | -1.1075 | Down | 2.25E-12 | 7.28E-12 |
| Unigene119309 | Potri.010G091500.1 | 2.3796  | 5.1275   | -1.1075 | Down | 2.37E-05 | 4.84E-05 |
| Unigene44880  | Potri.010G074100.1 | 4.311   | 9.289    | -1.1075 | Down | 5.85E-10 | 1.67E-09 |
| Unigene9491   | Potri.010G041100.4 | 6.0161  | 12.963   | -1.1075 | Down | 3.62E-11 | 1.10E-10 |
| Unigene4228   | Potri.009G163800.1 | 15.4403 | 33.2696  | -1.1075 | Down | 1.11E-09 | 3.12E-09 |
| Unigene31075  | Potri.009G086800.1 | 1.7983  | 3.8748   | -1.1075 | Down | 3.39E-04 | 6.13E-04 |
| Unigene61356  | Potri.009G073800.1 | 2.0357  | 4.3864   | -1.1075 | Down | 3.39E-04 | 6.13E-04 |
| Unigene15984  | Potri.009G016900.4 | 13.3573 | 28.7813  | -1.1075 | Down | 2.92E-11 | 8.93E-11 |
| Unigene22265  | Potri.008G210200.1 | 2.8166  | 6.069    | -1.1075 | Down | 6.65E-08 | 1.67E-07 |
| Unigene31238  | Potri.008G202200.1 | 4.5646  | 9.8355   | -1.1075 | Down | 1.39E-04 | 2.62E-04 |
| Unigene51471  | Potri.008G196900.1 | 3.9654  | 8.5444   | -1.1075 | Down | 2.71E-04 | 4.95E-04 |
| Unigene28748  | Potri.008G159700.2 | 9.5352  | 20.5458  | -1.1075 | Down | 1.02E-07 | 2.53E-07 |
| Unigene2549   | Potri.008G129300.4 | 3.0492  | 6.5701   | -1.1075 | Down | 3.45E-12 | 1.11E-11 |
| Unigene27253  | Potri.008G107900.1 | 11.4406 | 24.6514  | -1.1075 | Down | 3.48E-08 | 8.91E-08 |
| Unigene14849  | Potri.008G081000.1 | 2.4647  | 5.3108   | -1.1075 | Down | 4.24E-04 | 7.56E-04 |
| Unigene7593   | Potri.008G068500.1 | 4.6144  | 9.9427   | -1.1075 | Down | 4.32E-08 | 1.10E-07 |

|               |                     |         |          |         |      |          |          |
|---------------|---------------------|---------|----------|---------|------|----------|----------|
| Unigene51592  | Potri.008G058800.1  | 8.1809  | 17.6277  | -1.1075 | Down | 7.20E-07 | 1.68E-06 |
| Unigene52204  | Potri.008G035600.7  | 2.8167  | 6.0692   | -1.1075 | Down | 2.17E-04 | 4.00E-04 |
| Unigene23642  | Potri.008G017800.4  | 18.1193 | 39.0421  | -1.1075 | Down | 5.87E-22 | 2.78E-21 |
| Unigene58942  | Potri.007G126300.1  | 9.6464  | 20.7855  | -1.1075 | Down | 5.80E-07 | 1.36E-06 |
| Unigene12437  | Potri.007G118300.1  | 6.4746  | 13.9511  | -1.1075 | Down | 5.85E-10 | 1.67E-09 |
| Unigene16358  | Potri.007G085800.2  | 2.6968  | 5.8108   | -1.1075 | Down | 1.47E-08 | 3.85E-08 |
| Unigene49758  | Potri.007G053200.1  | 5.2101  | 11.2263  | -1.1075 | Down | 1.90E-05 | 3.92E-05 |
| Unigene109356 | Potri.007G052200.3  | 14.6409 | 31.5473  | -1.1075 | Down | 3.26E-09 | 8.88E-09 |
| Unigene34746  | Potri.007G050100.9  | 3.1194  | 6.7214   | -1.1075 | Down | 9.86E-06 | 2.08E-05 |
| Unigene21124  | Potri.007G018000.1  | 20.2674 | 43.6707  | -1.1075 | Down | 3.94E-21 | 1.82E-20 |
| Unigene119314 | Potri.006G277400.2  | 1.9834  | 4.2738   | -1.1075 | Down | 1.11E-04 | 2.12E-04 |
| Unigene29272  | Potri.006G277200.1  | 10.2312 | 22.0454  | -1.1075 | Down | 3.31E-13 | 1.11E-12 |
| Unigene26325  | Potri.006G262100.4  | 5.9426  | 12.8048  | -1.1075 | Down | 9.86E-06 | 2.08E-05 |
| Unigene23375  | Potri.006G251100.3  | 3.6372  | 7.8373   | -1.1075 | Down | 4.11E-06 | 8.98E-06 |
| Unigene70890  | Potri.006G234400.1  | 14.8456 | 31.9882  | -1.1075 | Down | 7.70E-09 | 2.05E-08 |
| Unigene38655  | Potri.006G216100.1  | 3.4537  | 7.4417   | -1.1075 | Down | 1.53E-05 | 3.17E-05 |
| Unigene109533 | Potri.006G195000.2  | 5.0311  | 10.8407  | -1.1075 | Down | 5.30E-04 | 9.38E-04 |
| Unigene40096  | Potri.006G112500.1  | 3.3553  | 7.2297   | -1.1075 | Down | 5.80E-07 | 1.36E-06 |
| Unigene4825   | Potri.006G060300.1  | 52.7447 | 113.6506 | -1.1075 | Down | 1.41E-47 | 1.31E-46 |
| Unigene18879  | Potri.006G039100.3  | 3.2017  | 6.8987   | -1.1075 | Down | 4.59E-05 | 9.12E-05 |
| Unigene77445  | Potri.005G255100.1  | 27.1269 | 58.4512  | -1.1075 | Down | 5.43E-17 | 2.16E-16 |
| Unigene43365  | Potri.005G250200.3  | 8.268   | 17.8153  | -1.1075 | Down | 4.26E-42 | 3.51E-41 |
| Unigene14774  | Potri.005G203100.10 | 7.4599  | 16.0741  | -1.1075 | Down | 2.96E-05 | 5.97E-05 |
| Unigene21026  | Potri.005G178400.1  | 15.8956 | 34.2507  | -1.1075 | Down | 8.51E-11 | 2.54E-10 |
| Unigene33674  | Potri.005G124300.1  | 17.9659 | 38.7117  | -1.1075 | Down | 4.21E-28 | 2.42E-27 |
| Unigene94931  | Potri.005G120700.1  | 1.9845  | 4.2761   | -1.1075 | Down | 1.90E-05 | 3.92E-05 |
| Unigene22995  | Potri.005G087600.1  | 5.5046  | 11.8608  | -1.1075 | Down | 1.27E-07 | 3.13E-07 |
| Unigene75916  | Potri.005G075000.1  | 14.2173 | 30.6345  | -1.1075 | Down | 2.63E-09 | 7.21E-09 |
| Unigene24623  | Potri.005G072600.1  | 6.2607  | 13.4901  | -1.1075 | Down | 5.36E-08 | 1.35E-07 |
| Unigene8254   | Potri.005G055100.1  | 3.2695  | 7.045    | -1.1075 | Down | 6.36E-06 | 1.37E-05 |
| Unigene111456 | Potri.005G049300.6  | 10.0853 | 21.7311  | -1.1075 | Down | 3.02E-07 | 7.24E-07 |
| Unigene77824  | Potri.005G026900.2  | 13.7672 | 29.6646  | -1.1075 | Down | 2.12E-09 | 5.85E-09 |
| Unigene49171  | Potri.004G196400.3  | 8.332   | 17.9533  | -1.1075 | Down | 2.36E-11 | 7.26E-11 |
| Unigene46312  | Potri.004G189700.3  | 5.0441  | 10.8686  | -1.1075 | Down | 7.14E-05 | 1.39E-04 |
| Unigene44483  | Potri.004G140600.10 | 8.6847  | 18.7131  | -1.1075 | Down | 1.19E-08 | 3.12E-08 |
| Unigene48011  | Potri.004G123700.1  | 5.6568  | 12.1889  | -1.1075 | Down | 2.71E-04 | 4.95E-04 |
| Unigene8862   | Potri.004G123300.4  | 6.2362  | 13.4373  | -1.1075 | Down | 2.66E-06 | 5.90E-06 |
| Unigene35380  | Potri.004G074900.2  | 9.0804  | 19.5658  | -1.1075 | Down | 1.96E-07 | 4.76E-07 |
| Unigene21647  | Potri.004G068600.1  | 6.5884  | 14.1963  | -1.1075 | Down | 6.33E-19 | 2.71E-18 |

|               |                    |         |          |         |      |          |          |
|---------------|--------------------|---------|----------|---------|------|----------|----------|
| Unigene6742   | Potri.003G197600.2 | 3.9263  | 8.46     | -1.1075 | Down | 5.11E-06 | 1.11E-05 |
| Unigene18467  | Potri.003G188700.3 | 4.0644  | 8.7577   | -1.1075 | Down | 2.48E-10 | 7.22E-10 |
| Unigene29722  | Potri.003G176600.1 | 4.354   | 9.3818   | -1.1075 | Down | 4.24E-04 | 7.56E-04 |
| Unigene116906 | Potri.003G168800.1 | 34.6432 | 74.6467  | -1.1075 | Down | 2.67E-30 | 1.63E-29 |
| Unigene45940  | Potri.003G158800.2 | 7.0717  | 15.2375  | -1.1075 | Down | 4.11E-06 | 8.98E-06 |
| Unigene50554  | Potri.003G158800.1 | 16.6226 | 35.8172  | -1.1075 | Down | 1.27E-16 | 4.96E-16 |
| Unigene11335  | Potri.003G157000.1 | 8.237   | 17.7485  | -1.1075 | Down | 4.86E-21 | 2.24E-20 |
| Unigene28126  | Potri.003G154300.2 | 3.9507  | 8.5128   | -1.1075 | Down | 1.73E-04 | 3.24E-04 |
| Unigene28240  | Potri.003G148600.1 | 5.8614  | 12.6296  | -1.1075 | Down | 1.90E-05 | 3.92E-05 |
| Unigene41543  | Potri.003G136600.1 | 19.7816 | 42.6239  | -1.1075 | Down | 4.99E-20 | 2.22E-19 |
| Unigene34607  | Potri.003G127900.1 | 2.5714  | 5.5406   | -1.1075 | Down | 1.71E-09 | 4.74E-09 |
| Unigene98770  | Potri.003G111600.1 | 2.0486  | 4.4143   | -1.1075 | Down | 5.30E-04 | 9.38E-04 |
| Unigene47639  | Potri.003G093800.1 | 11.7365 | 25.289   | -1.1075 | Down | 3.48E-08 | 8.91E-08 |
| Unigene29596  | Potri.003G092800.3 | 7.2505  | 15.6228  | -1.1075 | Down | 8.99E-10 | 2.53E-09 |
| Unigene53777  | Potri.003G057800.1 | 13.9217 | 29.9974  | -1.1075 | Down | 2.92E-11 | 8.93E-11 |
| Unigene90702  | Potri.003G015100.1 | 22.8949 | 49.3322  | -1.1075 | Down | 1.31E-23 | 6.54E-23 |
| Unigene12493  | Potri.002G246800.2 | 6.523   | 14.0552  | -1.1075 | Down | 1.24E-11 | 3.87E-11 |
| Unigene52758  | Potri.002G191200.2 | 7.5487  | 16.2654  | -1.1075 | Down | 1.02E-07 | 2.53E-07 |
| Unigene27001  | Potri.002G164100.1 | 10.2659 | 22.1203  | -1.1075 | Down | 5.80E-07 | 1.36E-06 |
| Unigene39260  | Potri.002G096500.1 | 6.3329  | 13.6456  | -1.1075 | Down | 2.25E-12 | 7.28E-12 |
| Unigene25539  | Potri.002G011100.1 | 2.5973  | 5.5964   | -1.1075 | Down | 1.11E-04 | 2.12E-04 |
| Unigene3523   | Potri.001G399500.1 | 2.8576  | 6.1574   | -1.1075 | Down | 7.14E-05 | 1.39E-04 |
| Unigene43839  | Potri.001G370900.1 | 3.8038  | 8.1961   | -1.1075 | Down | 1.27E-07 | 3.13E-07 |
| Unigene60535  | Potri.001G368500.2 | 3.0265  | 6.5213   | -1.1075 | Down | 2.81E-08 | 7.22E-08 |
| Unigene711    | Potri.001G362100.1 | 12.5504 | 27.0427  | -1.1075 | Down | 7.11E-54 | 7.51E-53 |
| Unigene104338 | Potri.001G346900.1 | 1.6795  | 3.6188   | -1.1075 | Down | 2.37E-05 | 4.84E-05 |
| Unigene50481  | Potri.001G277200.1 | 2.9565  | 6.3705   | -1.1075 | Down | 8.11E-12 | 2.55E-11 |
| Unigene6369   | Potri.001G256100.3 | 3.3416  | 7.2003   | -1.1075 | Down | 8.91E-05 | 1.72E-04 |
| Unigene51087  | Potri.001G219500.1 | 47.0383 | 101.3549 | -1.1075 | Down | 7.66E-46 | 6.86E-45 |
| Unigene100652 | Potri.001G205300.2 | 2.3936  | 5.1575   | -1.1075 | Down | 1.11E-04 | 2.12E-04 |
| Unigene1808   | Potri.001G199600.5 | 11.4542 | 24.6807  | -1.1075 | Down | 4.64E-23 | 2.28E-22 |
| Unigene52357  | Potri.001G199100.1 | 4.0758  | 8.7822   | -1.1075 | Down | 2.17E-04 | 4.00E-04 |
| Unigene108965 | Potri.001G193700.1 | 15.733  | 33.9003  | -1.1075 | Down | 1.11E-09 | 3.12E-09 |
| Unigene73255  | Potri.001G049400.3 | 5.1509  | 11.0988  | -1.1075 | Down | 5.30E-04 | 9.38E-04 |
| Unigene39707  | Potri.001G048100.3 | 7.0026  | 15.0887  | -1.1075 | Down | 4.69E-15 | 1.71E-14 |
| Unigene70319  | Potri.012G128900.1 | 1.5541  | 3.3488   | -1.1076 | Down | 4.24E-04 | 7.56E-04 |
| Unigene100051 | Potri.009G018600.3 | 84.8074 | 182.8779 | -1.1086 | Down | 4.85E-61 | 5.87E-60 |
| Unigene24485  | Potri.010G035400.1 | 15.9014 | 34.2934  | -1.1088 | Down | 1.19E-53 | 1.25E-52 |
| Unigene87429  | Potri.002G158200.1 | 46.6244 | 100.5902 | -1.1093 | Down | 6.06E-38 | 4.52E-37 |

|               |                    |         |          |         |      |          |          |
|---------------|--------------------|---------|----------|---------|------|----------|----------|
| Unigene10438  | Potri.007G021900.1 | 8.798   | 18.9837  | -1.1095 | Down | 1.19E-34 | 8.14E-34 |
| Unigene52527  | Potri.008G050200.5 | 33.5696 | 72.4364  | -1.1096 | Down | 6.39E-34 | 4.31E-33 |
| Unigene74058  | Potri.003G043700.3 | 61.3525 | 132.3858 | -1.1096 | Down | 5.18E-34 | 3.50E-33 |
| Unigene78026  | Potri.002G003600.1 | 54.0365 | 116.6058 | -1.1096 | Down | 8.01E-33 | 5.26E-32 |
| Unigene91730  | Potri.001G010800.1 | 29.5146 | 63.688   | -1.1096 | Down | 2.26E-33 | 1.51E-32 |
| Unigene34256  | Potri.018G047800.1 | 11.1083 | 23.972   | -1.1097 | Down | 1.00E-31 | 6.39E-31 |
| Unigene24474  | Potri.007G012600.1 | 9.8752  | 21.3113  | -1.1097 | Down | 2.33E-31 | 1.47E-30 |
| Unigene12915  | Potri.012G075100.1 | 21.7029 | 46.8431  | -1.1099 | Down | 8.54E-29 | 5.01E-28 |
| Unigene3921   | Potri.011G123500.1 | 34.1622 | 73.7355  | -1.11   | Down | 1.06E-28 | 6.17E-28 |
| Unigene21940  | Potri.006G178100.1 | 14.327  | 30.924   | -1.11   | Down | 2.45E-28 | 1.42E-27 |
| Unigene24412  | Potri.005G001700.1 | 16.7251 | 36.1095  | -1.1104 | Down | 7.46E-25 | 3.89E-24 |
| Unigene1249   | Potri.001G385400.1 | 9.5742  | 20.6728  | -1.1105 | Down | 9.41E-24 | 4.73E-23 |
| Unigene34604  | Potri.002G053900.2 | 18.9354 | 40.8887  | -1.1106 | Down | 5.10E-23 | 2.51E-22 |
| Unigene66232  | Potri.003G090100.1 | 4.292   | 9.2687   | -1.1107 | Down | 3.42E-22 | 1.63E-21 |
| Unigene88878  | Potri.002G088900.1 | 24.4676 | 52.8383  | -1.1107 | Down | 2.24E-22 | 1.08E-21 |
| Unigene11105  | Potri.003G056100.2 | 7.2353  | 15.6256  | -1.1108 | Down | 5.13E-42 | 4.22E-41 |
| Unigene28882  | Potri.012G143100.1 | 6.9109  | 14.9259  | -1.1109 | Down | 2.29E-21 | 1.07E-20 |
| Unigene12891  | Potri.002G079100.1 | 15.4548 | 33.3809  | -1.111  | Down | 8.16E-21 | 3.73E-20 |
| Unigene514    | Potri.015G056400.1 | 4.3025  | 9.2941   | -1.1111 | Down | 1.88E-38 | 1.42E-37 |
| Unigene8060   | Potri.011G011300.1 | 15.6595 | 33.8268  | -1.1111 | Down | 5.48E-20 | 2.44E-19 |
| Unigene1322   | Potri.004G132900.1 | 9.5133  | 20.5493  | -1.1111 | Down | 2.90E-20 | 1.30E-19 |
| Unigene36081  | Potri.004G226400.1 | 35.1268 | 75.8837  | -1.1112 | Down | 1.58E-19 | 6.91E-19 |
| Unigene45174  | Potri.004G032800.3 | 8.839   | 19.0955  | -1.1113 | Down | 2.98E-19 | 1.29E-18 |
| Unigene16073  | Potri.018G052200.1 | 66.4322 | 143.5374 | -1.1115 | Down | 6.28E-52 | 6.38E-51 |
| Unigene29367  | Potri.012G098300.1 | 17.0404 | 36.8194  | -1.1115 | Down | 3.07E-18 | 1.28E-17 |
| Unigene50179  | Potri.007G113300.1 | 7.0664  | 15.2695  | -1.1116 | Down | 7.16E-18 | 2.94E-17 |
| Unigene7750   | Potri.005G100100.1 | 5.4731  | 11.8272  | -1.1117 | Down | 1.35E-17 | 5.49E-17 |
| Unigene103965 | Potri.018G115500.1 | 16.1374 | 34.8758  | -1.1118 | Down | 4.83E-17 | 1.92E-16 |
| Unigene32883  | Potri.010G185300.1 | 6.8041  | 14.7051  | -1.1118 | Down | 5.97E-17 | 2.36E-16 |
| Unigene32304  | Potri.010G185600.2 | 12.972  | 28.0362  | -1.1119 | Down | 4.74E-32 | 3.05E-31 |
| Unigene9153   | Potri.002G237800.2 | 8.5478  | 18.474   | -1.1119 | Down | 7.38E-17 | 2.91E-16 |
| Unigene53635  | Potri.003G057800.1 | 26.0608 | 56.3295  | -1.112  | Down | 2.13E-16 | 8.25E-16 |
| Unigene22851  | Potri.002G119300.1 | 9.5182  | 20.5733  | -1.112  | Down | 2.13E-16 | 8.25E-16 |
| Unigene34508  | Potri.001G135200.1 | 10.2429 | 22.14    | -1.112  | Down | 2.64E-16 | 1.02E-15 |
| Unigene6517   | Potri.010G171400.1 | 6.0262  | 13.0273  | -1.1122 | Down | 9.42E-16 | 3.54E-15 |
| Unigene69912  | Potri.006G049400.1 | 3.6887  | 7.9743   | -1.1122 | Down | 1.17E-15 | 4.37E-15 |
| Unigene2750   | Potri.005G016800.1 | 5.4611  | 11.8056  | -1.1122 | Down | 9.42E-16 | 3.54E-15 |
| Unigene89308  | Potri.015G088300.2 | 45.7767 | 98.9789  | -1.1125 | Down | 1.31E-41 | 1.06E-40 |
| Unigene7806   | Potri.017G142200.2 | 6.9064  | 14.9342  | -1.1126 | Down | 9.54E-28 | 5.43E-27 |

|               |                    |         |          |         |      |           |           |
|---------------|--------------------|---------|----------|---------|------|-----------|-----------|
| Unigene79169  | Potri.010G099300.1 | 21.9773 | 47.5219  | -1.1126 | Down | 9.76E-15  | 3.52E-14  |
| Unigene28370  | Potri.010G070800.4 | 7.9804  | 17.2578  | -1.1127 | Down | 2.28E-14  | 8.09E-14  |
| Unigene18019  | Potri.001G015900.1 | 6.9221  | 14.9689  | -1.1127 | Down | 1.85E-14  | 6.57E-14  |
| Unigene49793  | Potri.006G042600.1 | 14.4455 | 31.2423  | -1.1129 | Down | 5.35E-14  | 1.87E-13  |
| Unigene22452  | Potri.013G049100.1 | 17.6081 | 38.0854  | -1.113  | Down | 6.50E-26  | 3.50E-25  |
| Unigene24000  | Potri.010G213700.1 | 37.2054 | 80.4719  | -1.113  | Down | 3.14E-38  | 2.36E-37  |
| Unigene58030  | Potri.001G467000.1 | 4.7505  | 10.275   | -1.113  | Down | 5.26E-26  | 2.84E-25  |
| Unigene42822  | Potri.016G123900.2 | 25.9821 | 56.2035  | -1.1131 | Down | 2.04E-131 | 6.15E-130 |
| Unigene114353 | Potri.010G192000.3 | 53.305  | 115.3075 | -1.1131 | Down | 3.93E-37  | 2.88E-36  |
| Unigene2726   | Potri.019G106000.1 | 12.4662 | 26.9678  | -1.1132 | Down | 2.94E-13  | 9.92E-13  |
| Unigene41334  | Potri.010G255600.1 | 33.596  | 72.6754  | -1.1132 | Down | 3.52E-25  | 1.85E-24  |
| Unigene33592  | Potri.005G118400.1 | 9.3002  | 20.1192  | -1.1132 | Down | 1.39E-36  | 1.00E-35  |
| Unigene44771  | Potri.019G043400.1 | 7.2624  | 15.711   | -1.1133 | Down | 3.64E-13  | 1.22E-12  |
| Unigene12229  | Potri.005G083500.4 | 18.3923 | 39.7889  | -1.1133 | Down | 8.19E-25  | 4.26E-24  |
| Unigene617    | Potri.011G008600.1 | 5.7636  | 12.4695  | -1.1134 | Down | 5.57E-13  | 1.86E-12  |
| Unigene33259  | Potri.003G166900.1 | 8.5537  | 18.5063  | -1.1134 | Down | 6.89E-13  | 2.28E-12  |
| Unigene50838  | Potri.018G083700.4 | 8.1173  | 17.563   | -1.1135 | Down | 8.53E-13  | 2.81E-12  |
| Unigene2331   | Potri.015G058400.4 | 34.2387 | 74.0819  | -1.1135 | Down | 3.15E-46  | 2.84E-45  |
| Unigene39367  | Potri.006G069300.1 | 15.8905 | 34.3831  | -1.1135 | Down | 8.36E-24  | 4.21E-23  |
| Unigene27677  | Potri.003G057800.1 | 13.1966 | 28.5526  | -1.1135 | Down | 8.53E-13  | 2.81E-12  |
| Unigene24330  | Potri.T003200.1    | 7.1391  | 15.4475  | -1.1136 | Down | 1.16E-34  | 7.94E-34  |
| Unigene18451  | Potri.013G058800.1 | 5.0883  | 11.0103  | -1.1136 | Down | 1.62E-12  | 5.26E-12  |
| Unigene2738   | Potri.001G245000.1 | 85.2415 | 184.444  | -1.1136 | Down | 1.35E-155 | 5.06E-154 |
| Unigene104735 | Potri.008G053800.1 | 32.2892 | 69.8743  | -1.1137 | Down | 3.67E-23  | 1.81E-22  |
| Unigene30909  | Potri.008G047100.2 | 16.2838 | 35.237   | -1.1137 | Down | 2.00E-12  | 6.48E-12  |
| Unigene17112  | Potri.T145800.2    | 28.6047 | 61.9069  | -1.1138 | Down | 1.06E-22  | 5.13E-22  |
| Unigene76038  | Potri.012G058200.1 | 18.9828 | 41.0822  | -1.1138 | Down | 3.80E-12  | 1.21E-11  |
| Unigene14285  | Potri.005G217500.1 | 39.914  | 86.3794  | -1.1138 | Down | 6.91E-23  | 3.38E-22  |
| Unigene51551  | Potri.015G147500.2 | 19.7054 | 42.6494  | -1.1139 | Down | 5.82E-12  | 1.84E-11  |
| Unigene10966  | Potri.006G211200.1 | 8.2235  | 17.7986  | -1.1139 | Down | 1.99E-22  | 9.58E-22  |
| Unigene38140  | Potri.015G019100.1 | 12.0321 | 26.0438  | -1.1141 | Down | 8.92E-12  | 2.80E-11  |
| Unigene83797  | Potri.007G144800.4 | 59.7066 | 129.2403 | -1.1141 | Down | 3.28E-42  | 2.71E-41  |
| Unigene2222   | Potri.012G078600.1 | 6.5107  | 14.0943  | -1.1142 | Down | 1.69E-11  | 5.23E-11  |
| Unigene33031  | Potri.005G258600.5 | 6.0668  | 13.1328  | -1.1142 | Down | 1.37E-11  | 4.25E-11  |
| Unigene50824  | Potri.002G002400.1 | 22.0406 | 47.7108  | -1.1142 | Down | 7.93E-32  | 5.07E-31  |
| Unigene8849   | Potri.001G200500.1 | 16.0492 | 34.7418  | -1.1142 | Down | 1.37E-11  | 4.25E-11  |
| Unigene22774  | Potri.016G012500.1 | 25.6763 | 55.5874  | -1.1143 | Down | 1.78E-60  | 2.14E-59  |
| Unigene33273  | Potri.007G000200.1 | 6.3271  | 13.698   | -1.1143 | Down | 2.59E-11  | 7.96E-11  |
| Unigene4827   | Potri.005G199600.4 | 55.8618 | 120.9329 | -1.1143 | Down | 2.81E-31  | 1.77E-30  |

|              |                    |         |          |         |      |          |          |
|--------------|--------------------|---------|----------|---------|------|----------|----------|
| Unigene26018 | Potri.008G107900.1 | 42.8028 | 92.6675  | -1.1144 | Down | 1.17E-40 | 9.35E-40 |
| Unigene23543 | Potri.004G153300.1 | 10.1726 | 22.0236  | -1.1144 | Down | 3.84E-21 | 1.78E-20 |
| Unigene11303 | Potri.016G128400.1 | 3.3436  | 7.2396   | -1.1145 | Down | 3.98E-11 | 1.21E-10 |
| Unigene53742 | Potri.015G056700.1 | 14.4976 | 31.39    | -1.1145 | Down | 3.98E-11 | 1.21E-10 |
| Unigene13059 | Potri.008G186000.1 | 19.0747 | 41.3043  | -1.1146 | Down | 2.09E-20 | 9.42E-20 |
| Unigene77147 | Potri.008G148000.3 | 48.9759 | 106.054  | -1.1147 | Down | 1.01E-29 | 6.09E-29 |
| Unigene47031 | Potri.003G058400.2 | 12.6012 | 27.2879  | -1.1147 | Down | 7.56E-11 | 2.26E-10 |
| Unigene45137 | Potri.003G203800.2 | 3.4804  | 7.5371   | -1.1148 | Down | 9.36E-11 | 2.79E-10 |
| Unigene30782 | Potri.002G031900.1 | 10.9574 | 23.7295  | -1.1148 | Down | 9.36E-11 | 2.79E-10 |
| Unigene53481 | Potri.015G046500.5 | 8.1305  | 17.6092  | -1.1149 | Down | 1.44E-10 | 4.23E-10 |
| Unigene40669 | Potri.010G099000.2 | 38.3879 | 83.1418  | -1.1149 | Down | 9.87E-38 | 7.33E-37 |
| Unigene28739 | Potri.007G045400.1 | 5.7796  | 12.5178  | -1.1149 | Down | 1.44E-10 | 4.23E-10 |
| Unigene3295  | Potri.002G151100.1 | 17.6417 | 38.2105  | -1.115  | Down | 1.86E-37 | 1.37E-36 |
| Unigene69529 | Potri.001G037300.3 | 4.9733  | 10.7719  | -1.115  | Down | 1.78E-10 | 5.22E-10 |
| Unigene6175  | Potri.017G119100.1 | 58.1725 | 126.0112 | -1.1151 | Down | 1.85E-45 | 1.64E-44 |
| Unigene48041 | Potri.004G190900.2 | 21.5864 | 46.7595  | -1.1151 | Down | 5.56E-28 | 3.18E-27 |
| Unigene33791 | Potri.006G123000.3 | 32.069  | 69.4696  | -1.1152 | Down | 1.88E-36 | 1.35E-35 |
| Unigene50692 | Potri.002G165500.1 | 7.1968  | 15.5905  | -1.1152 | Down | 3.38E-10 | 9.77E-10 |
| Unigene24916 | Potri.003G086400.1 | 31.422  | 68.0713  | -1.1153 | Down | 1.60E-27 | 9.02E-27 |
| Unigene48940 | Potri.019G083700.1 | 25.8083 | 55.9143  | -1.1154 | Down | 3.71E-27 | 2.08E-26 |
| Unigene5961  | Potri.005G092800.1 | 8.9323  | 19.3523  | -1.1154 | Down | 5.20E-10 | 1.48E-09 |
| Unigene65245 | Potri.003G129900.2 | 9.8439  | 21.3267  | -1.1154 | Down | 3.01E-27 | 1.69E-26 |
| Unigene44448 | Potri.011G021000.1 | 16.1935 | 35.0885  | -1.1156 | Down | 1.63E-26 | 8.91E-26 |
| Unigene32813 | Potri.009G025700.1 | 24.554  | 53.2101  | -1.1157 | Down | 4.67E-26 | 2.52E-25 |
| Unigene45752 | Potri.006G139200.1 | 7.0263  | 15.2263  | -1.1157 | Down | 6.35E-18 | 2.62E-17 |
| Unigene44474 | Potri.018G058900.4 | 6.9636  | 15.091   | -1.1158 | Down | 1.23E-09 | 3.42E-09 |
| Unigene42954 | Potri.009G146700.1 | 5.4631  | 11.8391  | -1.1158 | Down | 7.85E-18 | 3.22E-17 |
| Unigene85548 | Potri.003G220400.3 | 33.5696 | 72.7491  | -1.1158 | Down | 5.77E-26 | 3.11E-25 |
| Unigene11399 | Potri.010G150000.3 | 6.6208  | 14.3489  | -1.1159 | Down | 1.20E-17 | 4.89E-17 |
| Unigene12174 | Potri.005G238800.1 | 7.9269  | 17.1797  | -1.1159 | Down | 1.09E-25 | 5.81E-25 |
| Unigene42490 | Potri.001G060300.5 | 6.5034  | 14.0948  | -1.1159 | Down | 1.34E-25 | 7.15E-25 |
| Unigene20772 | Potri.005G032800.1 | 8.1924  | 17.7563  | -1.116  | Down | 1.88E-09 | 5.20E-09 |
| Unigene127   | Potri.001G424500.1 | 8.5568  | 18.547   | -1.116  | Down | 4.55E-33 | 3.01E-32 |
| Unigene53258 | Potri.010G235900.1 | 22.1425 | 47.9951  | -1.1161 | Down | 2.80E-17 | 1.12E-16 |
| Unigene22325 | Potri.004G175200.4 | 8.3551  | 18.1101  | -1.1161 | Down | 3.86E-25 | 2.03E-24 |
| Unigene51417 | Potri.006G091900.2 | 3.4475  | 7.4732   | -1.1162 | Down | 2.89E-09 | 7.92E-09 |
| Unigene53612 | Potri.001G241100.1 | 13.6543 | 29.6007  | -1.1163 | Down | 3.59E-09 | 9.75E-09 |
| Unigene32998 | Potri.001G015400.2 | 44.833  | 97.1967  | -1.1163 | Down | 7.72E-70 | 1.08E-68 |
| Unigene8092  | Potri.019G052100.1 | 5.9591  | 12.9195  | -1.1164 | Down | 4.45E-09 | 1.20E-08 |



|               |                    |         |          |         |      |          |          |
|---------------|--------------------|---------|----------|---------|------|----------|----------|
| Unigene53603  | Potri.010G141700.2 | 13.6093 | 29.5054  | -1.1164 | Down | 4.45E-09 | 1.20E-08 |
| Unigene115057 | Potri.017G039100.1 | 10.5814 | 22.9426  | -1.1165 | Down | 5.51E-09 | 1.48E-08 |
| Unigene17097  | Potri.014G048700.1 | 8.9609  | 19.4289  | -1.1165 | Down | 5.51E-09 | 1.48E-08 |
| Unigene26986  | Potri.007G125700.1 | 4.5827  | 9.9369   | -1.1166 | Down | 6.84E-09 | 1.83E-08 |
| Unigene36593  | Potri.004G106900.4 | 10.6763 | 23.1502  | -1.1166 | Down | 6.84E-09 | 1.83E-08 |
| Unigene1165   | Potri.012G084600.3 | 11.1899 | 24.2657  | -1.1167 | Down | 3.58E-16 | 1.37E-15 |
| Unigene70258  | Potri.012G093000.2 | 9.2053  | 19.9638  | -1.1168 | Down | 5.47E-16 | 2.08E-15 |
| Unigene944    | Potri.013G077900.4 | 11.843  | 25.6852  | -1.1169 | Down | 6.42E-66 | 8.47E-65 |
| Unigene18612  | Potri.010G150000.3 | 6.2436  | 13.5407  | -1.1169 | Down | 1.05E-08 | 2.78E-08 |
| Unigene202    | Potri.008G170900.1 | 2.7938  | 6.0591   | -1.1169 | Down | 1.05E-08 | 2.78E-08 |
| Unigene39405  | Potri.006G160400.3 | 7.9928  | 17.3348  | -1.1169 | Down | 6.76E-16 | 2.56E-15 |
| Unigene41298  | Potri.005G209000.1 | 2.3525  | 5.1024   | -1.117  | Down | 1.30E-08 | 3.42E-08 |
| Unigene17312  | Potri.001G205800.8 | 37.7969 | 81.9778  | -1.117  | Down | 3.82E-37 | 2.80E-36 |
| Unigene48612  | Potri.008G193300.4 | 22.592  | 49.0063  | -1.1172 | Down | 1.58E-15 | 5.89E-15 |
| Unigene94784  | Potri.005G021700.1 | 12.5462 | 27.2163  | -1.1172 | Down | 2.01E-08 | 5.22E-08 |
| Unigene45492  | Potri.005G096900.1 | 7.664   | 16.626   | -1.1173 | Down | 4.78E-36 | 3.41E-35 |
| Unigene27658  | Potri.015G080600.1 | 9.3896  | 20.3717  | -1.1174 | Down | 3.70E-15 | 1.36E-14 |
| Unigene23339  | Potri.014G101900.1 | 3.8467  | 8.3457   | -1.1174 | Down | 3.70E-15 | 1.36E-14 |
| Unigene47376  | Potri.013G070400.1 | 38.7754 | 84.1287  | -1.1175 | Down | 1.13E-28 | 6.59E-28 |
| Unigene84548  | Potri.009G116000.2 | 76.8718 | 166.7902 | -1.1175 | Down | 2.22E-55 | 2.42E-54 |
| Unigene18636  | Potri.018G151500.1 | 11.5082 | 24.9729  | -1.1177 | Down | 8.66E-15 | 3.13E-14 |
| Unigene53362  | Potri.008G208000.1 | 13.8038 | 29.9543  | -1.1177 | Down | 8.66E-15 | 3.13E-14 |
| Unigene28644  | Potri.007G106300.1 | 4.6459  | 10.0821  | -1.1178 | Down | 4.75E-08 | 1.20E-07 |
| Unigene23453  | Potri.006G266900.1 | 11.6043 | 25.1827  | -1.1178 | Down | 1.07E-14 | 3.85E-14 |
| Unigene20020  | Potri.014G169100.2 | 39.435  | 85.5853  | -1.1179 | Down | 1.42E-27 | 8.02E-27 |
| Unigene50146  | Potri.007G085600.1 | 10.2357 | 22.2153  | -1.1179 | Down | 2.65E-40 | 2.09E-39 |
| Unigene29440  | Potri.001G035700.1 | 11.4429 | 24.8342  | -1.1179 | Down | 4.21E-21 | 1.95E-20 |
| Unigene2462   | Potri.019G021500.1 | 3.5926  | 7.798    | -1.1181 | Down | 7.32E-08 | 1.83E-07 |
| Unigene72636  | Potri.005G223500.1 | 12.1941 | 26.4681  | -1.1181 | Down | 7.32E-08 | 1.83E-07 |
| Unigene87729  | Potri.011G110800.3 | 31.0053 | 67.3102  | -1.1183 | Down | 1.44E-26 | 7.92E-26 |
| Unigene116158 | Potri.002G003100.5 | 32.0054 | 69.4815  | -1.1183 | Down | 1.44E-26 | 7.92E-26 |
| Unigene1331   | Potri.007G096900.2 | 21.9311 | 47.6137  | -1.1184 | Down | 2.20E-26 | 1.20E-25 |
| Unigene118777 | Potri.005G250100.1 | 5.0446  | 10.9521  | -1.1184 | Down | 1.13E-07 | 2.78E-07 |
| Unigene2951   | Potri.008G096700.1 | 21.6416 | 46.9932  | -1.1186 | Down | 6.30E-38 | 4.71E-37 |
| Unigene45825  | Potri.006G116500.5 | 46.1804 | 100.2717 | -1.1186 | Down | 5.12E-26 | 2.76E-25 |
| Unigene59175  | Potri.010G022100.1 | 5.9829  | 12.9922  | -1.1187 | Down | 1.74E-07 | 4.23E-07 |
| Unigene880    | Potri.009G130600.1 | 5.8153  | 12.6282  | -1.1187 | Down | 1.38E-13 | 4.71E-13 |
| Unigene49575  | Potri.004G135800.1 | 7.5543  | 16.4047  | -1.1187 | Down | 1.74E-07 | 4.23E-07 |
| Unigene54463  | Potri.004G145200.2 | 17.0397 | 37.0051  | -1.1188 | Down | 1.70E-13 | 5.81E-13 |

|              |                    |         |          |         |      |          |          |
|--------------|--------------------|---------|----------|---------|------|----------|----------|
| Unigene596   | Potri.018G142400.1 | 2.6023  | 5.6517   | -1.1189 | Down | 2.16E-07 | 5.22E-07 |
| Unigene65769 | Potri.006G264500.1 | 9.3995  | 20.4141  | -1.1189 | Down | 2.16E-07 | 5.22E-07 |
| Unigene21870 | Potri.005G045200.2 | 9.9126  | 21.5278  | -1.1189 | Down | 2.24E-25 | 1.19E-24 |
| Unigene33392 | Potri.002G154000.1 | 5.86    | 12.727   | -1.1189 | Down | 2.16E-07 | 5.22E-07 |
| Unigene73046 | Potri.019G051500.1 | 44.0813 | 95.7523  | -1.1191 | Down | 7.97E-25 | 4.15E-24 |
| Unigene24371 | Potri.017G042500.1 | 2.7629  | 6.0014   | -1.1191 | Down | 2.68E-07 | 6.45E-07 |
| Unigene13817 | Potri.015G046500.5 | 6.2082  | 13.485   | -1.1191 | Down | 3.23E-13 | 1.09E-12 |
| Unigene75875 | Potri.013G106000.1 | 62.0544 | 134.7916 | -1.1191 | Down | 1.83E-36 | 1.32E-35 |
| Unigene45911 | Potri.005G093300.1 | 7.0991  | 15.4221  | -1.1193 | Down | 4.94E-13 | 1.65E-12 |
| Unigene95283 | Potri.018G019400.1 | 1.491   | 3.2394   | -1.1194 | Down | 4.14E-07 | 9.81E-07 |
| Unigene146   | Potri.013G059700.1 | 18.698  | 40.6213  | -1.1194 | Down | 1.59E-92 | 3.09E-91 |
| Unigene16641 | Potri.011G023000.2 | 26.5176 | 57.6093  | -1.1194 | Down | 1.03E-18 | 4.39E-18 |
| Unigene14754 | Potri.002G143200.1 | 25.4008 | 55.1865  | -1.1194 | Down | 6.45E-30 | 3.91E-29 |
| Unigene80124 | Potri.018G079300.1 | 18.0433 | 39.2051  | -1.1196 | Down | 9.36E-13 | 3.08E-12 |
| Unigene18384 | Potri.008G126400.1 | 8.806   | 19.1343  | -1.1196 | Down | 1.50E-29 | 8.99E-29 |
| Unigene43527 | Potri.011G143000.4 | 5.6165  | 12.2055  | -1.1198 | Down | 1.24E-23 | 6.22E-23 |
| Unigene37449 | Potri.006G194500.1 | 3.877   | 8.4259   | -1.1199 | Down | 6.38E-07 | 1.49E-06 |
| Unigene19062 | Potri.002G041800.1 | 3.2289  | 7.0174   | -1.1199 | Down | 1.77E-12 | 5.76E-12 |
| Unigene3056  | Potri.001G191200.1 | 9.518   | 20.6859  | -1.1199 | Down | 4.97E-56 | 5.49E-55 |
| Unigene75243 | Potri.011G123500.1 | 48.8285 | 106.1255 | -1.12   | Down | 1.00E-28 | 5.86E-28 |
| Unigene88400 | Potri.009G099400.1 | 32.035  | 69.6302  | -1.1201 | Down | 1.53E-28 | 8.88E-28 |
| Unigene27728 | Potri.007G127600.2 | 2.9819  | 6.4815   | -1.1201 | Down | 7.93E-07 | 1.84E-06 |
| Unigene15007 | Potri.004G123600.5 | 31.8513 | 69.2329  | -1.1201 | Down | 4.41E-23 | 2.17E-22 |
| Unigene58563 | Potri.001G471800.5 | 6.5018  | 14.1324  | -1.1201 | Down | 7.93E-07 | 1.84E-06 |
| Unigene70381 | Potri.001G047600.1 | 2.3862  | 5.1866   | -1.1201 | Down | 7.93E-07 | 1.84E-06 |
| Unigene11855 | Potri.014G077800.2 | 19.9166 | 43.2939  | -1.1202 | Down | 2.87E-28 | 1.66E-27 |
| Unigene12748 | Potri.009G026700.1 | 5.6717  | 12.3287  | -1.1202 | Down | 1.32E-17 | 5.35E-17 |
| Unigene37250 | Potri.015G091500.1 | 7.912   | 17.2005  | -1.1203 | Down | 9.86E-07 | 2.27E-06 |
| Unigene9835  | Potri.010G254600.1 | 14.0501 | 30.5444  | -1.1203 | Down | 2.01E-17 | 8.12E-17 |
| Unigene41984 | Potri.005G119000.1 | 2.6677  | 5.7994   | -1.1203 | Down | 9.86E-07 | 2.27E-06 |
| Unigene12104 | Potri.003G129300.1 | 5.615   | 12.2068  | -1.1203 | Down | 9.86E-07 | 2.27E-06 |
| Unigene25345 | Potri.001G230000.1 | 16.1503 | 35.1103  | -1.1203 | Down | 2.01E-17 | 8.12E-17 |
| Unigene13384 | Potri.018G040200.4 | 19.8645 | 43.1875  | -1.1204 | Down | 8.24E-28 | 4.70E-27 |
| Unigene40473 | Potri.013G009800.1 | 17.5961 | 38.2554  | -1.1204 | Down | 2.49E-17 | 1.00E-16 |
| Unigene4879  | Potri.014G092600.2 | 10.5954 | 23.0368  | -1.1205 | Down | 1.94E-22 | 9.32E-22 |
| Unigene41402 | Potri.009G054400.1 | 13.7376 | 29.8698  | -1.1206 | Down | 3.80E-17 | 1.52E-16 |
| Unigene5668  | Potri.004G167200.4 | 24.3258 | 52.892   | -1.1206 | Down | 3.80E-17 | 1.52E-16 |
| Unigene39034 | Potri.014G143300.1 | 6.5232  | 14.1845  | -1.1207 | Down | 2.37E-27 | 1.33E-26 |
| Unigene11409 | Potri.015G106200.1 | 3.157   | 6.8655   | -1.1208 | Down | 9.79E-12 | 3.06E-11 |

|               |                    |         |          |         |      |           |           |
|---------------|--------------------|---------|----------|---------|------|-----------|-----------|
| Unigene12628  | Potri.006G273800.1 | 3.1769  | 6.9088   | -1.1208 | Down | 1.52E-06  | 3.46E-06  |
| Unigene21685  | Potri.006G153100.1 | 19.4475 | 42.2906  | -1.1208 | Down | 7.27E-195 | 3.67E-193 |
| Unigene39583  | Potri.015G095400.2 | 11.7269 | 25.5044  | -1.1209 | Down | 6.85E-32  | 4.38E-31  |
| Unigene32412  | Potri.013G141800.1 | 31.4006 | 68.2953  | -1.121  | Down | 9.16E-67  | 1.23E-65  |
| Unigene33980  | Potri.008G021100.3 | 14.5359 | 31.6163  | -1.121  | Down | 1.36E-16  | 5.29E-16  |
| Unigene21950  | Potri.007G041100.6 | 3.8237  | 8.3169   | -1.1211 | Down | 1.89E-06  | 4.27E-06  |
| Unigene22150  | Potri.006G136300.5 | 7.4543  | 16.214   | -1.1211 | Down | 1.58E-26  | 8.67E-26  |
| Unigene72943  | Potri.001G345300.1 | 9.4587  | 20.5733  | -1.1211 | Down | 1.89E-06  | 4.27E-06  |
| Unigene36358  | Potri.018G052200.1 | 21.7031 | 47.2087  | -1.1212 | Down | 1.95E-26  | 1.07E-25  |
| Unigene46553  | Potri.010G023200.2 | 3.8106  | 8.2897   | -1.1213 | Down | 2.35E-06  | 5.25E-06  |
| Unigene29372  | Potri.004G138900.3 | 2.2449  | 4.8836   | -1.1213 | Down | 2.35E-06  | 5.25E-06  |
| Unigene106021 | Potri.002G047400.1 | 1.526   | 3.3198   | -1.1213 | Down | 2.35E-06  | 5.25E-06  |
| Unigene823    | Potri.015G104300.1 | 8.9483  | 19.4722  | -1.1217 | Down | 1.08E-20  | 4.90E-20  |
| Unigene43115  | Potri.002G129300.1 | 19.6489 | 42.7566  | -1.1217 | Down | 4.71E-35  | 3.27E-34  |
| Unigene23169  | Potri.013G128900.1 | 17.1669 | 37.3587  | -1.1218 | Down | 4.64E-30  | 2.82E-29  |
| Unigene39754  | Potri.006G100100.1 | 15.1624 | 32.9976  | -1.1219 | Down | 3.04E-25  | 1.60E-24  |
| Unigene2150   | Potri.005G131200.1 | 8.7018  | 18.9384  | -1.1219 | Down | 2.03E-20  | 9.17E-20  |
| Unigene11578  | Potri.002G121000.1 | 13.6355 | 29.6752  | -1.1219 | Down | 9.92E-49  | 9.43E-48  |
| Unigene84319  | Potri.001G424900.1 | 6.7328  | 14.6524  | -1.1219 | Down | 3.64E-06  | 8.02E-06  |
| Unigene35907  | Potri.001G311700.1 | 49.4981 | 107.7292 | -1.122  | Down | 3.44E-81  | 5.74E-80  |
| Unigene39287  | Potri.009G009100.1 | 6.5258  | 14.204   | -1.1221 | Down | 3.10E-20  | 1.39E-19  |
| Unigene119375 | Potri.003G113300.1 | 2.5279  | 5.5025   | -1.1221 | Down | 4.53E-06  | 9.86E-06  |
| Unigene32597  | Potri.001G073700.4 | 5.2595  | 11.4484  | -1.1221 | Down | 3.83E-20  | 1.71E-19  |
| Unigene36821  | Potri.006G160500.3 | 53.2851 | 115.9925 | -1.1222 | Down | 1.73E-38  | 1.31E-37  |
| Unigene64764  | Potri.006G040100.2 | 8.9592  | 19.5016  | -1.1222 | Down | 4.53E-06  | 9.86E-06  |
| Unigene48322  | Potri.001G382700.1 | 4.8673  | 10.5948  | -1.1222 | Down | 8.30E-11  | 2.48E-10  |
| Unigene94805  | Potri.001G003900.2 | 9.0479  | 19.6947  | -1.1222 | Down | 4.53E-06  | 9.86E-06  |
| Unigene86246  | Potri.001G236700.1 | 90.8163 | 197.7005 | -1.1223 | Down | 2.48E-70  | 3.50E-69  |
| Unigene54119  | Potri.001G222700.1 | 8.2604  | 17.9824  | -1.1223 | Down | 1.03E-10  | 3.06E-10  |
| Unigene94962  | Potri.014G161600.2 | 5.6479  | 12.2964  | -1.1224 | Down | 5.64E-06  | 1.22E-05  |
| Unigene119326 | Potri.007G011800.5 | 2.6061  | 5.6739   | -1.1224 | Down | 5.64E-06  | 1.22E-05  |
| Unigene9979   | Potri.003G066900.1 | 5.6658  | 12.3353  | -1.1224 | Down | 5.64E-06  | 1.22E-05  |
| Unigene43503  | Potri.010G095100.1 | 14.2053 | 30.9293  | -1.1225 | Down | 3.18E-33  | 2.11E-32  |
| Unigene42799  | Potri.003G078000.3 | 6.9006  | 15.0254  | -1.1226 | Down | 1.36E-19  | 5.98E-19  |
| Unigene32804  | Potri.002G095600.1 | 8.6378  | 18.8073  | -1.1226 | Down | 1.10E-28  | 6.41E-28  |
| Unigene27232  | Potri.001G149600.2 | 26.4345 | 57.5626  | -1.1227 | Down | 5.84E-24  | 2.96E-23  |
| Unigene12084  | Potri.008G020600.1 | 5.7953  | 12.6201  | -1.1228 | Down | 1.95E-10  | 5.71E-10  |
| Unigene49119  | Potri.006G017300.4 | 10.5185 | 22.9056  | -1.1228 | Down | 6.20E-15  | 2.26E-14  |
| Unigene76502  | Potri.018G095300.1 | 61.7258 | 134.4248 | -1.1229 | Down | 5.02E-37  | 3.67E-36  |

|               |                    |          |          |         |      |          |          |
|---------------|--------------------|----------|----------|---------|------|----------|----------|
| Unigene50612  | Potri.006G018000.1 | 6.869    | 14.96    | -1.1229 | Down | 2.42E-10 | 7.04E-10 |
| Unigene23383  | Potri.006G006200.2 | 11.1779  | 24.343   | -1.1229 | Down | 2.57E-19 | 1.12E-18 |
| Unigene5150   | Potri.003G031800.2 | 23.7361  | 51.6928  | -1.1229 | Down | 7.67E-15 | 2.78E-14 |
| Unigene91701  | Potri.010G002400.2 | 63.8561  | 139.0741 | -1.123  | Down | 7.65E-72 | 1.11E-70 |
| Unigene18129  | Potri.004G097200.1 | 5.9321   | 12.92    | -1.123  | Down | 9.49E-15 | 3.42E-14 |
| Unigene16517  | Potri.011G104400.1 | 2.2283   | 4.8535   | -1.1231 | Down | 8.73E-06 | 1.85E-05 |
| Unigene23374  | Potri.004G058000.2 | 3.3123   | 7.2147   | -1.1231 | Down | 8.73E-06 | 1.85E-05 |
| Unigene448    | Potri.004G133700.5 | 9.9805   | 21.7408  | -1.1232 | Down | 1.73E-53 | 1.81E-52 |
| Unigene45309  | Potri.003G040200.1 | 7.148    | 15.57    | -1.1232 | Down | 1.11E-27 | 6.33E-27 |
| Unigene37603  | Potri.002G166700.4 | 13.886   | 30.2481  | -1.1232 | Down | 1.45E-14 | 5.19E-14 |
| Unigene18377  | Potri.013G158000.1 | 5.6196   | 12.2419  | -1.1233 | Down | 7.42E-19 | 3.17E-18 |
| Unigene71999  | Potri.006G047000.5 | 115.5376 | 251.6966 | -1.1233 | Down | 1.04E-61 | 1.27E-60 |
| Unigene113340 | Potri.013G037700.2 | 19.9029  | 43.3619  | -1.1234 | Down | 2.22E-14 | 7.87E-14 |
| Unigene102833 | Potri.016G096800.1 | 4.7684   | 10.3888  | -1.1235 | Down | 1.09E-05 | 2.29E-05 |
| Unigene42891  | Potri.010G135500.1 | 8.4561   | 18.4234  | -1.1235 | Down | 6.46E-57 | 7.26E-56 |
| Unigene613    | Potri.006G201000.3 | 29.299   | 63.8398  | -1.1236 | Down | 1.66E-77 | 2.63E-76 |
| Unigene9733   | Potri.002G179500.2 | 58.1583  | 126.7199 | -1.1236 | Down | 1.35E-77 | 2.13E-76 |
| Unigene50679  | Potri.001G287700.2 | 19.4308  | 42.3392  | -1.1236 | Down | 4.04E-31 | 2.53E-30 |
| Unigene50218  | Potri.001G070800.1 | 6.8468   | 14.9181  | -1.1236 | Down | 2.75E-14 | 9.71E-14 |
| Unigene5500   | Potri.003G043300.3 | 9.2553   | 20.1676  | -1.1237 | Down | 3.40E-14 | 1.20E-13 |
| Unigene48874  | Potri.002G235700.1 | 12.1138  | 26.3969  | -1.1237 | Down | 2.14E-18 | 8.98E-18 |
| Unigene9847   | Potri.010G138900.3 | 19.0835  | 41.587   | -1.1238 | Down | 2.65E-18 | 1.11E-17 |
| Unigene8500   | Potri.008G040300.4 | 3.4551   | 7.5294   | -1.1238 | Down | 1.35E-05 | 2.83E-05 |
| Unigene28456  | Potri.T074800.1    | 17.0549  | 37.1696  | -1.1239 | Down | 1.73E-26 | 9.48E-26 |
| Unigene32896  | Potri.009G077500.1 | 4.5482   | 9.9121   | -1.1239 | Down | 2.12E-22 | 1.02E-21 |
| Unigene1184   | Potri.018G034700.3 | 2.0422   | 4.451    | -1.124  | Down | 8.76E-10 | 2.47E-09 |
| Unigene28668  | Potri.008G182900.6 | 4.7167   | 10.2799  | -1.124  | Down | 8.76E-10 | 2.47E-09 |
| Unigene54459  | Potri.001G370200.1 | 11.9744  | 26.0981  | -1.124  | Down | 8.76E-10 | 2.47E-09 |
| Unigene903    | Potri.018G112600.1 | 9.2419   | 20.1437  | -1.1241 | Down | 1.24E-38 | 9.43E-38 |
| Unigene12588  | Potri.011G115900.1 | 16.6344  | 36.2563  | -1.1241 | Down | 2.64E-26 | 1.44E-25 |
| Unigene39666  | Potri.001G090100.1 | 9.546    | 20.8074  | -1.1241 | Down | 3.26E-26 | 1.77E-25 |
| Unigene45369  | Potri.015G036400.1 | 1.9704   | 4.295    | -1.1242 | Down | 1.69E-05 | 3.48E-05 |
| Unigene17719  | Potri.012G015500.1 | 4.6221   | 10.0753  | -1.1242 | Down | 1.69E-05 | 3.48E-05 |
| Unigene107873 | Potri.008G145600.1 | 7.9009   | 17.2222  | -1.1242 | Down | 1.69E-05 | 3.48E-05 |
| Unigene39446  | Potri.004G161700.3 | 15.5172  | 33.8278  | -1.1243 | Down | 7.54E-22 | 3.56E-21 |
| Unigene41792  | Potri.001G171100.1 | 20.3777  | 44.422   | -1.1243 | Down | 7.63E-18 | 3.13E-17 |
| Unigene4510   | Potri.010G029700.1 | 10.395   | 22.6618  | -1.1244 | Down | 1.35E-09 | 3.75E-09 |
| Unigene34894  | Potri.008G169300.1 | 1.4906   | 3.25     | -1.1245 | Down | 2.10E-05 | 4.30E-05 |
| Unigene44613  | Potri.008G109100.1 | 4.6056   | 10.0414  | -1.1245 | Down | 1.16E-25 | 6.17E-25 |

|               |                    |         |          |         |      |           |           |
|---------------|--------------------|---------|----------|---------|------|-----------|-----------|
| Unigene25279  | Potri.010G141700.2 | 8.1806  | 17.8368  | -1.1246 | Down | 1.67E-09  | 4.62E-09  |
| Unigene26197  | Potri.008G089000.1 | 49.3967 | 107.7036 | -1.1246 | Down | 1.46E-29  | 8.73E-29  |
| Unigene81537  | Potri.006G159900.1 | 24.5738 | 53.5803  | -1.1246 | Down | 1.44E-17  | 5.85E-17  |
| Unigene46296  | Potri.004G211200.2 | 6.5823  | 14.3519  | -1.1246 | Down | 2.10E-05  | 4.30E-05  |
| Unigene108820 | Potri.001G173800.3 | 7.4599  | 16.2654  | -1.1246 | Down | 2.10E-05  | 4.30E-05  |
| Unigene34500  | Potri.007G145600.1 | 9.4191  | 20.5391  | -1.1247 | Down | 2.18E-25  | 1.15E-24  |
| Unigene32784  | Potri.007G085300.3 | 16.0774 | 35.0581  | -1.1247 | Down | 1.87E-13  | 6.35E-13  |
| Unigene15414  | Potri.002G144800.1 | 25.0268 | 54.5741  | -1.1247 | Down | 2.17E-21  | 1.01E-20  |
| Unigene39288  | Potri.002G071000.6 | 11.0047 | 23.9971  | -1.1247 | Down | 2.17E-21  | 1.01E-20  |
| Unigene23765  | Potri.011G098100.1 | 19.229  | 41.9324  | -1.1248 | Down | 2.69E-25  | 1.42E-24  |
| Unigene36607  | Potri.006G125300.2 | 56.2526 | 122.6792 | -1.1249 | Down | 6.78E-37  | 4.94E-36  |
| Unigene8112   | Potri.019G100500.2 | 3.4678  | 7.5632   | -1.125  | Down | 2.62E-05  | 5.32E-05  |
| Unigene24321  | Potri.006G194900.2 | 2.0096  | 4.3829   | -1.125  | Down | 2.62E-05  | 5.32E-05  |
| Unigene23710  | Potri.012G047400.2 | 6.0229  | 13.137   | -1.1251 | Down | 9.71E-29  | 5.69E-28  |
| Unigene25120  | Potri.006G234000.1 | 18.4237 | 40.1852  | -1.1251 | Down | 4.16E-17  | 1.66E-16  |
| Unigene29573  | Potri.004G157500.1 | 13.1913 | 28.7737  | -1.1252 | Down | 6.25E-21  | 2.87E-20  |
| Unigene33112  | Potri.002G036700.1 | 3.5839  | 7.8178   | -1.1252 | Down | 3.18E-09  | 8.66E-09  |
| Unigene17302  | Potri.018G107500.2 | 10.6696 | 23.2751  | -1.1253 | Down | 4.38E-13  | 1.46E-12  |
| Unigene62263  | Potri.017G115500.2 | 16.3523 | 35.6716  | -1.1253 | Down | 1.18E-24  | 6.11E-24  |
| Unigene48802  | Potri.017G091900.2 | 13.7419 | 29.978   | -1.1253 | Down | 6.36E-17  | 2.52E-16  |
| Unigene2422   | Potri.005G253200.1 | 10.0839 | 22.0006  | -1.1255 | Down | 3.44E-28  | 1.98E-27  |
| Unigene30461  | Potri.004G206200.3 | 7.0833  | 15.4558  | -1.1257 | Down | 4.88E-09  | 1.32E-08  |
| Unigene13781  | Potri.010G024200.1 | 21.8237 | 47.6232  | -1.1258 | Down | 1.84E-46  | 1.67E-45  |
| Unigene77723  | Potri.002G108000.2 | 56.3495 | 122.9702 | -1.1258 | Down | 3.70E-35  | 2.57E-34  |
| Unigene33748  | Potri.013G002600.1 | 3.3518  | 7.3148   | -1.1259 | Down | 4.06E-05  | 8.11E-05  |
| Unigene19216  | Potri.009G023100.2 | 6.5526  | 14.3001  | -1.1259 | Down | 4.06E-05  | 8.11E-05  |
| Unigene13180  | Potri.005G202600.1 | 4.5781  | 9.991    | -1.1259 | Down | 1.84E-16  | 7.13E-16  |
| Unigene113997 | Potri.003G222800.3 | 22.1244 | 48.2834  | -1.1259 | Down | 1.84E-16  | 7.14E-16  |
| Unigene11503  | Potri.001G371900.1 | 46.5393 | 101.564  | -1.1259 | Down | 1.92E-105 | 4.37E-104 |
| Unigene22434  | Potri.T064000.1    | 9.968   | 21.7554  | -1.126  | Down | 2.27E-16  | 8.78E-16  |
| Unigene11685  | Potri.003G082800.1 | 9.0113  | 19.6672  | -1.126  | Down | 4.19E-20  | 1.87E-19  |
| Unigene44173  | Potri.010G115200.1 | 4.0623  | 8.8669   | -1.1261 | Down | 7.51E-09  | 2.00E-08  |
| Unigene50255  | Potri.010G089700.2 | 4.9011  | 10.6978  | -1.1261 | Down | 7.51E-09  | 2.00E-08  |
| Unigene37088  | Potri.004G229800.2 | 23.9213 | 52.2121  | -1.1261 | Down | 2.30E-27  | 1.29E-26  |
| Unigene16212  | Potri.010G003500.1 | 30.3477 | 66.2552  | -1.1264 | Down | 2.80E-23  | 1.39E-22  |
| Unigene56867  | Potri.008G153200.1 | 4.7404  | 10.3487  | -1.1264 | Down | 5.07E-05  | 1.00E-04  |
| Unigene55754  | Potri.008G046800.7 | 6.0314  | 13.1671  | -1.1264 | Down | 5.07E-05  | 1.00E-04  |
| Unigene27388  | Potri.004G224000.3 | 5.3086  | 11.589   | -1.1264 | Down | 5.07E-05  | 1.00E-04  |
| Unigene29124  | Potri.002G004000.2 | 4.4201  | 9.6495   | -1.1264 | Down | 1.95E-12  | 6.31E-12  |

|               |                    |         |         |         |      |          |          |
|---------------|--------------------|---------|---------|---------|------|----------|----------|
| Unigene11400  | Potri.018G110200.1 | 5.2489  | 11.46   | -1.1265 | Down | 2.41E-12 | 7.77E-12 |
| Unigene39923  | Potri.009G139600.1 | 36.6756 | 80.0716 | -1.1265 | Down | 4.83E-52 | 4.92E-51 |
| Unigene18878  | Potri.001G274500.1 | 7.2089  | 15.7412 | -1.1267 | Down | 2.32E-44 | 2.00E-43 |
| Unigene28685  | Potri.017G090800.1 | 2.8203  | 6.1592  | -1.1269 | Down | 3.69E-12 | 1.18E-11 |
| Unigene29761  | Potri.010G132500.1 | 1.7536  | 3.8296  | -1.1269 | Down | 6.32E-05 | 1.24E-04 |
| Unigene91771  | Potri.006G046500.2 | 3.1509  | 6.881   | -1.1269 | Down | 6.32E-05 | 1.24E-04 |
| Unigene50074  | Potri.017G061400.1 | 7.0026  | 15.294  | -1.127  | Down | 1.24E-15 | 4.65E-15 |
| Unigene24309  | Potri.015G053100.1 | 16.6177 | 36.2932 | -1.127  | Down | 3.48E-19 | 1.51E-18 |
| Unigene7174   | Potri.010G038700.5 | 11.9985 | 26.2047 | -1.127  | Down | 3.48E-19 | 1.51E-18 |
| Unigene11705  | Potri.009G140200.1 | 36.7978 | 80.3704 | -1.127  | Down | 1.79E-85 | 3.17E-84 |
| Unigene13656  | Potri.001G163600.1 | 2.3885  | 5.217   | -1.1271 | Down | 1.78E-08 | 4.63E-08 |
| Unigene2741   | Potri.010G042200.3 | 8.4149  | 18.3837 | -1.1274 | Down | 1.02E-25 | 5.48E-25 |
| Unigene9571   | Potri.006G205100.2 | 1.8344  | 4.0075  | -1.1274 | Down | 7.88E-05 | 1.53E-04 |
| Unigene73446  | Potri.006G159900.1 | 31.8195 | 69.5147 | -1.1274 | Down | 8.12E-19 | 3.46E-18 |
| Unigene70185  | Potri.005G226200.1 | 4.2028  | 9.1816  | -1.1274 | Down | 2.20E-08 | 5.71E-08 |
| Unigene41343  | Potri.004G158400.1 | 16.6289 | 36.3284 | -1.1274 | Down | 2.35E-15 | 8.69E-15 |
| Unigene15339  | Potri.006G275600.1 | 52.3911 | 114.475 | -1.1276 | Down | 1.92E-42 | 1.59E-41 |
| Unigene24903  | Potri.005G101900.1 | 4.5927  | 10.0347 | -1.1276 | Down | 8.66E-12 | 2.72E-11 |
| Unigene28776  | Potri.005G083500.2 | 8.217   | 17.954  | -1.1276 | Down | 1.24E-18 | 5.25E-18 |
| Unigene21671  | Potri.009G033500.1 | 2.863   | 6.2559  | -1.1277 | Down | 2.73E-08 | 7.04E-08 |
| Unigene19226  | Potri.006G250300.4 | 12.4332 | 27.1692 | -1.1278 | Down | 1.07E-11 | 3.35E-11 |
| Unigene34801  | Potri.015G147300.1 | 25.5692 | 55.8793 | -1.1279 | Down | 2.40E-65 | 3.13E-64 |
| Unigene27268  | Potri.002G000300.4 | 38.5185 | 84.1788 | -1.1279 | Down | 7.26E-32 | 4.65E-31 |
| Unigene37504  | Potri.017G049700.1 | 3.0717  | 6.7133  | -1.128  | Down | 9.84E-05 | 1.89E-04 |
| Unigene119083 | Potri.016G099400.1 | 2.2863  | 4.9968  | -1.128  | Down | 9.84E-05 | 1.89E-04 |
| Unigene110837 | Potri.014G197600.2 | 11.5021 | 25.1379 | -1.128  | Down | 3.39E-08 | 8.69E-08 |
| Unigene47099  | Potri.013G085000.3 | 6.1579  | 13.4583 | -1.128  | Down | 9.84E-05 | 1.89E-04 |
| Unigene51861  | Potri.010G255600.1 | 10.2794 | 22.4657 | -1.128  | Down | 1.33E-11 | 4.13E-11 |
| Unigene68209  | Potri.008G041800.1 | 2.0366  | 4.4511  | -1.128  | Down | 9.84E-05 | 1.89E-04 |
| Unigene65267  | Potri.003G069100.1 | 2.2316  | 4.8772  | -1.128  | Down | 9.84E-05 | 1.89E-04 |
| Unigene50725  | Potri.002G248800.2 | 22.8232 | 49.8802 | -1.128  | Down | 4.05E-35 | 2.81E-34 |
| Unigene5943   | Potri.002G166000.1 | 10.1991 | 22.2902 | -1.128  | Down | 3.39E-08 | 8.69E-08 |
| Unigene8339   | Potri.001G013800.1 | 5.4623  | 11.9379 | -1.128  | Down | 9.84E-05 | 1.89E-04 |
| Unigene107938 | Potri.014G196400.2 | 31.8143 | 69.5362 | -1.1281 | Down | 2.90E-18 | 1.21E-17 |
| Unigene18083  | Potri.011G114300.5 | 5.2797  | 11.5399 | -1.1281 | Down | 6.79E-15 | 2.46E-14 |
| Unigene47946  | Potri.007G069600.1 | 19.7887 | 43.2528 | -1.1281 | Down | 6.79E-15 | 2.46E-14 |
| Unigene34858  | Potri.016G105700.1 | 13.2774 | 29.0226 | -1.1282 | Down | 3.58E-18 | 1.49E-17 |
| Unigene34717  | Potri.004G147600.1 | 3.9783  | 8.6961  | -1.1282 | Down | 3.58E-18 | 1.49E-17 |
| Unigene25689  | Potri.012G072700.1 | 6.2316  | 13.6221 | -1.1283 | Down | 4.21E-08 | 1.07E-07 |

|               |                    |         |         |         |      |          |          |
|---------------|--------------------|---------|---------|---------|------|----------|----------|
| Unigene41594  | Potri.010G046800.1 | 15.4575 | 33.7894 | -1.1283 | Down | 8.40E-15 | 3.04E-14 |
| Unigene47546  | Potri.008G092000.2 | 28.5134 | 62.3317 | -1.1283 | Down | 4.42E-18 | 1.83E-17 |
| Unigene14675  | Potri.001G024500.1 | 13.4747 | 29.4551 | -1.1283 | Down | 8.40E-15 | 3.04E-14 |
| Unigene1491   | Potri.009G050900.1 | 7.3315  | 16.028  | -1.1284 | Down | 1.04E-14 | 3.74E-14 |
| Unigene45154  | Potri.004G168100.1 | 4.131   | 9.0309  | -1.1284 | Down | 2.04E-11 | 6.28E-11 |
| Unigene16441  | Potri.003G097600.2 | 23.7676 | 51.9604 | -1.1284 | Down | 1.04E-14 | 3.74E-14 |
| Unigene18188  | Potri.008G159500.3 | 31.2949 | 68.4214 | -1.1285 | Down | 4.76E-44 | 4.08E-43 |
| Unigene8580   | Potri.008G170100.1 | 2.6587  | 5.813   | -1.1286 | Down | 1.23E-04 | 2.33E-04 |
| Unigene23737  | Potri.008G029200.1 | 8.235   | 18.0051 | -1.1286 | Down | 2.52E-11 | 7.74E-11 |
| Unigene14537  | Potri.007G074800.1 | 5.982   | 13.0791 | -1.1286 | Down | 1.23E-04 | 2.33E-04 |
| Unigene51241  | Potri.005G020400.1 | 10.7931 | 23.5981 | -1.1286 | Down | 5.22E-08 | 1.32E-07 |
| Unigene34036  | Potri.002G157400.1 | 3.4968  | 7.6455  | -1.1286 | Down | 2.52E-11 | 7.74E-11 |
| Unigene22338  | Potri.001G173500.1 | 3.8842  | 8.4924  | -1.1286 | Down | 5.22E-08 | 1.32E-07 |
| Unigene83171  | Potri.018G020400.1 | 37.7186 | 82.4775 | -1.1287 | Down | 1.65E-27 | 9.29E-27 |
| Unigene49929  | Potri.015G036300.3 | 8.7306  | 19.0915 | -1.1288 | Down | 5.53E-21 | 2.54E-20 |
| Unigene32073  | Potri.005G213400.3 | 8.2888  | 18.1259 | -1.1288 | Down | 7.71E-34 | 5.19E-33 |
| Unigene22168  | Potri.018G056400.1 | 4.2202  | 9.2295  | -1.1289 | Down | 1.28E-17 | 5.19E-17 |
| Unigene18695  | Potri.006G047100.4 | 3.2882  | 7.191   | -1.1289 | Down | 6.48E-08 | 1.63E-07 |
| Unigene110941 | Potri.017G036300.2 | 16.2672 | 35.5825 | -1.1292 | Down | 4.79E-11 | 1.45E-10 |
| Unigene6649   | Potri.013G044300.1 | 5.2378  | 11.4571 | -1.1292 | Down | 8.04E-08 | 2.00E-07 |
| Unigene38373  | Potri.007G069800.1 | 3.0695  | 6.7142  | -1.1292 | Down | 8.04E-08 | 2.00E-07 |
| Unigene71471  | Potri.006G109500.6 | 18.1904 | 39.7893 | -1.1292 | Down | 4.79E-11 | 1.45E-10 |
| Unigene50866  | Potri.004G237100.2 | 29.8138 | 65.2141 | -1.1292 | Down | 6.29E-46 | 5.64E-45 |
| Unigene4413   | Potri.002G139900.4 | 24.0173 | 52.5348 | -1.1292 | Down | 3.01E-14 | 1.06E-13 |
| Unigene97849  | Potri.002G079100.1 | 5.9177  | 12.9443 | -1.1292 | Down | 1.53E-04 | 2.88E-04 |
| Unigene94777  | Potri.001G054700.1 | 3.4869  | 7.6272  | -1.1292 | Down | 1.53E-04 | 2.88E-04 |
| Unigene62117  | Potri.010G254400.1 | 9.6194  | 21.0444 | -1.1294 | Down | 5.93E-11 | 1.79E-10 |
| Unigene51808  | Potri.008G012200.2 | 14.799  | 32.3759 | -1.1294 | Down | 5.93E-11 | 1.79E-10 |
| Unigene45518  | Potri.014G169200.5 | 24.6835 | 54.0046 | -1.1295 | Down | 1.00E-57 | 1.14E-56 |
| Unigene53482  | Potri.010G092900.1 | 13.6718 | 29.9123 | -1.1295 | Down | 2.43E-20 | 1.09E-19 |
| Unigene18681  | Potri.013G088600.1 | 8.1196  | 17.769  | -1.1299 | Down | 9.09E-11 | 2.71E-10 |
| Unigene50375  | Potri.010G244800.2 | 10.7254 | 23.4715 | -1.1299 | Down | 3.79E-23 | 1.87E-22 |
| Unigene6567   | Potri.003G208900.1 | 13.7987 | 30.197  | -1.1299 | Down | 4.59E-20 | 2.04E-19 |
| Unigene61139  | Potri.001G397600.2 | 3.1083  | 6.8022  | -1.1299 | Down | 1.92E-04 | 3.57E-04 |
| Unigene32706  | Potri.001G261000.3 | 7.3981  | 16.1906 | -1.1299 | Down | 2.00E-38 | 1.51E-37 |
| Unigene11005  | Potri.014G131000.2 | 9.717   | 21.2672 | -1.13   | Down | 2.05E-50 | 2.02E-49 |
| Unigene7437   | Potri.018G001000.1 | 18.0789 | 39.5701 | -1.1301 | Down | 4.99E-29 | 2.95E-28 |
| Unigene116849 | Potri.008G044100.1 | 14.1404 | 30.9486 | -1.1301 | Down | 8.72E-14 | 3.01E-13 |
| Unigene30680  | Potri.009G119200.2 | 5.1874  | 11.3548 | -1.1302 | Down | 1.54E-07 | 3.76E-07 |

|               |                    |         |          |         |      |          |          |
|---------------|--------------------|---------|----------|---------|------|----------|----------|
| Unigene77273  | Potri.016G064100.1 | 15.2442 | 33.3712  | -1.1303 | Down | 1.40E-10 | 4.11E-10 |
| Unigene52560  | Potri.014G023500.1 | 13.8583 | 30.3374  | -1.1303 | Down | 1.40E-10 | 4.11E-10 |
| Unigene89227  | Potri.008G094000.1 | 16.6838 | 36.5216  | -1.1303 | Down | 1.06E-16 | 4.17E-16 |
| Unigene12875  | Potri.006G248100.5 | 34.3741 | 75.2488  | -1.1303 | Down | 8.17E-65 | 1.06E-63 |
| Unigene23218  | Potri.001G285800.1 | 27.9468 | 61.1775  | -1.1303 | Down | 7.23E-50 | 7.04E-49 |
| Unigene48745  | Potri.007G014100.1 | 14.3318 | 31.3761  | -1.1304 | Down | 1.32E-16 | 5.13E-16 |
| Unigene24370  | Potri.011G089300.1 | 8.2972  | 18.1654  | -1.1305 | Down | 1.35E-22 | 6.51E-22 |
| Unigene93356  | Potri.014G118000.7 | 2.0393  | 4.465    | -1.1306 | Down | 2.39E-04 | 4.40E-04 |
| Unigene65812  | Potri.006G269900.1 | 3.7911  | 8.3006   | -1.1306 | Down | 2.39E-04 | 4.40E-04 |
| Unigene41357  | Potri.006G209500.1 | 4.3469  | 9.5175   | -1.1306 | Down | 2.39E-04 | 4.40E-04 |
| Unigene41473  | Potri.004G117000.5 | 3.4828  | 7.6255   | -1.1306 | Down | 2.39E-04 | 4.40E-04 |
| Unigene32447  | Potri.T106600.3    | 7.5367  | 16.5026  | -1.1307 | Down | 2.05E-22 | 9.88E-22 |
| Unigene28857  | Potri.018G066200.1 | 10.3834 | 22.7354  | -1.1307 | Down | 2.27E-31 | 1.44E-30 |
| Unigene2944   | Potri.013G059800.6 | 11.1307 | 24.3715  | -1.1307 | Down | 2.79E-43 | 2.36E-42 |
| Unigene52318  | Potri.005G260400.3 | 9.4673  | 20.7301  | -1.1307 | Down | 2.05E-22 | 9.88E-22 |
| Unigene50510  | Potri.003G105000.1 | 9.041   | 19.7981  | -1.1308 | Down | 2.54E-22 | 1.22E-21 |
| Unigene44216  | Potri.012G109800.2 | 31.1801 | 68.2835  | -1.1309 | Down | 7.99E-43 | 6.69E-42 |
| Unigene86615  | Potri.010G099100.2 | 22.4533 | 49.174   | -1.131  | Down | 3.08E-19 | 1.33E-18 |
| Unigene1556   | Potri.008G087800.1 | 21.6069 | 47.3217  | -1.131  | Down | 5.08E-28 | 2.91E-27 |
| Unigene1548   | Potri.T102400.1    | 23.7361 | 51.9879  | -1.1311 | Down | 6.27E-28 | 3.58E-27 |
| Unigene10283  | Potri.006G091300.6 | 15.8654 | 34.7517  | -1.1312 | Down | 3.80E-16 | 1.46E-15 |
| Unigene28296  | Potri.002G012700.1 | 31.223  | 68.3915  | -1.1312 | Down | 3.92E-48 | 3.68E-47 |
| Unigene48791  | Potri.011G056300.2 | 2.4273  | 5.3173   | -1.1313 | Down | 2.99E-04 | 5.45E-04 |
| Unigene40248  | Potri.004G059700.1 | 1.936   | 4.241    | -1.1313 | Down | 2.99E-04 | 5.45E-04 |
| Unigene60914  | Potri.016G017900.1 | 2.8115  | 6.159    | -1.1314 | Down | 2.99E-04 | 5.45E-04 |
| Unigene39378  | Potri.005G215400.1 | 8.6551  | 18.9603  | -1.1314 | Down | 7.29E-22 | 3.45E-21 |
| Unigene105725 | Potri.002G160600.3 | 5.0863  | 11.1423  | -1.1314 | Down | 2.94E-07 | 7.06E-07 |
| Unigene37863  | Potri.T034900.1    | 20.6706 | 45.2861  | -1.1315 | Down | 7.19E-19 | 3.07E-18 |
| Unigene639    | Potri.006G218400.1 | 11.2966 | 24.7493  | -1.1315 | Down | 8.92E-65 | 1.15E-63 |
| Unigene32744  | Potri.018G040200.2 | 19.3861 | 42.4741  | -1.1316 | Down | 6.84E-79 | 1.10E-77 |
| Unigene8046   | Potri.013G043300.1 | 5.7347  | 12.5644  | -1.1316 | Down | 4.79E-13 | 1.60E-12 |
| Unigene115778 | Potri.010G249200.3 | 22.2796 | 48.8156  | -1.1316 | Down | 8.88E-19 | 3.78E-18 |
| Unigene16740  | Potri.004G143900.1 | 19.2149 | 42.0988  | -1.1316 | Down | 4.79E-13 | 1.60E-12 |
| Unigene30379  | Potri.015G020800.1 | 25.8454 | 56.639   | -1.1319 | Down | 1.36E-18 | 5.73E-18 |
| Unigene6419   | Potri.001G123500.1 | 9.3249  | 20.4351  | -1.1319 | Down | 5.04E-10 | 1.44E-09 |
| Unigene36295  | Potri.018G020400.1 | 53.6726 | 117.6331 | -1.132  | Down | 4.82E-55 | 5.21E-54 |
| Unigene35030  | Potri.010G190100.2 | 30.1456 | 66.0705  | -1.1321 | Down | 3.39E-66 | 4.49E-65 |
| Unigene5635   | Potri.011G096100.1 | 21.6337 | 47.4185  | -1.1322 | Down | 9.08E-13 | 2.99E-12 |
| Unigene46921  | Potri.006G209700.2 | 6.2525  | 13.7048  | -1.1322 | Down | 4.54E-07 | 1.07E-06 |



|               |                     |         |          |         |      |           |           |
|---------------|---------------------|---------|----------|---------|------|-----------|-----------|
| Unigene5193   | Potri.006G114800.2  | 5.1755  | 11.3441  | -1.1322 | Down | 3.74E-04  | 6.75E-04  |
| Unigene99206  | Potri.003G140500.7  | 4.9392  | 10.8262  | -1.1322 | Down | 3.74E-04  | 6.75E-04  |
| Unigene13989  | Potri.003G060100.2  | 26.9076 | 58.9783  | -1.1322 | Down | 1.36E-15  | 5.07E-15  |
| Unigene1758   | Potri.001G418400.1  | 23.9931 | 52.5899  | -1.1322 | Down | 3.17E-35  | 2.21E-34  |
| Unigene443    | Potri.002G027100.1  | 9.627   | 21.1028  | -1.1323 | Down | 6.18E-24  | 3.13E-23  |
| Unigene1804   | Potri.001G171100.1  | 13.265  | 29.0777  | -1.1323 | Down | 3.96E-21  | 1.83E-20  |
| Unigene1555   | Potri.004G140600.10 | 41.6545 | 91.3182  | -1.1324 | Down | 3.93E-101 | 8.53E-100 |
| Unigene6866   | Potri.002G241800.1  | 27.5389 | 60.3717  | -1.1324 | Down | 3.73E-32  | 2.41E-31  |
| Unigene52478  | Potri.001G268200.2  | 17.0779 | 37.4391  | -1.1324 | Down | 4.89E-21  | 2.25E-20  |
| Unigene53825  | Potri.008G012200.2  | 20.4316 | 44.7924  | -1.1325 | Down | 3.17E-18  | 1.32E-17  |
| Unigene24     | Potri.001G318800.1  | 9.9522  | 21.819   | -1.1325 | Down | 1.35E-92  | 2.61E-91  |
| Unigene49303  | Potri.018G030500.1  | 6.9253  | 15.184   | -1.1326 | Down | 5.64E-07  | 1.32E-06  |
| Unigene21411  | Potri.015G138500.1  | 9.4074  | 20.626   | -1.1326 | Down | 5.64E-07  | 1.32E-06  |
| Unigene110563 | Potri.006G092900.1  | 9.4914  | 20.8102  | -1.1326 | Down | 5.64E-07  | 1.32E-06  |
| Unigene46148  | Potri.019G128600.1  | 9.1105  | 19.9771  | -1.1327 | Down | 9.60E-10  | 2.70E-09  |
| Unigene49451  | Potri.004G223700.1  | 18.0769 | 39.6366  | -1.1327 | Down | 2.57E-15  | 9.48E-15  |
| Unigene76331  | Potri.002G059800.1  | 51.722  | 113.4116 | -1.1327 | Down | 8.66E-32  | 5.53E-31  |
| Unigene66045  | Potri.017G084100.1  | 7.6373  | 16.7473  | -1.1328 | Down | 9.22E-21  | 4.21E-20  |
| Unigene9156   | Potri.006G118700.1  | 29.5143 | 64.722   | -1.1328 | Down | 3.45E-26  | 1.87E-25  |
| Unigene1471   | Potri.019G052100.1  | 8.3602  | 18.3338  | -1.1329 | Down | 5.98E-18  | 2.46E-17  |
| Unigene308    | Potri.010G244600.1  | 12.5139 | 27.4425  | -1.1329 | Down | 1.32E-31  | 8.38E-31  |
| Unigene77739  | Potri.013G064300.4  | 13.447  | 29.4921  | -1.133  | Down | 1.19E-09  | 3.33E-09  |
| Unigene99842  | Potri.010G209500.1  | 1.3815  | 3.0298   | -1.133  | Down | 4.68E-04  | 8.31E-04  |
| Unigene5391   | Potri.010G170100.4  | 3.7167  | 8.1514   | -1.133  | Down | 4.68E-04  | 8.31E-04  |
| Unigene6322   | Potri.008G078600.1  | 23.7361 | 52.0581  | -1.133  | Down | 7.39E-18  | 3.03E-17  |
| Unigene12797  | Potri.006G267600.1  | 7.4777  | 16.4002  | -1.133  | Down | 7.39E-18  | 3.03E-17  |
| Unigene29537  | Potri.002G237600.1  | 6.0838  | 13.343   | -1.133  | Down | 1.19E-09  | 3.33E-09  |
| Unigene11614  | Potri.T102900.1     | 2.9193  | 6.4027   | -1.1331 | Down | 2.13E-12  | 6.88E-12  |
| Unigene11674  | Potri.016G096400.1  | 2.1184  | 4.6462   | -1.1331 | Down | 1.19E-09  | 3.33E-09  |
| Unigene45295  | Potri.013G107900.5  | 7.9465  | 17.4294  | -1.1331 | Down | 2.48E-31  | 1.57E-30  |
| Unigene24174  | Potri.003G130300.1  | 25.4367 | 55.7923  | -1.1332 | Down | 3.35E-23  | 1.65E-22  |
| Unigene112885 | Potri.016G023000.4  | 12.5339 | 27.4951  | -1.1333 | Down | 1.47E-09  | 4.10E-09  |
| Unigene1791   | Potri.001G471100.7  | 8.8656  | 19.4472  | -1.1333 | Down | 2.64E-12  | 8.49E-12  |
| Unigene18692  | Potri.005G118400.1  | 12.3057 | 26.9962  | -1.1334 | Down | 2.66E-20  | 1.19E-19  |
| Unigene16239  | Potri.002G231100.1  | 22.2828 | 48.8833  | -1.1334 | Down | 6.01E-15  | 2.18E-14  |
| Unigene11046  | Potri.008G085300.1  | 10.3783 | 22.7687  | -1.1335 | Down | 7.99E-63  | 9.97E-62  |
| Unigene36611  | Potri.001G253700.4  | 8.2059  | 18.003   | -1.1335 | Down | 3.26E-12  | 1.05E-11  |
| Unigene74274  | Potri.012G034200.1  | 23.7676 | 52.1473  | -1.1336 | Down | 7.43E-15  | 2.69E-14  |
| Unigene22905  | Potri.010G211000.1  | 16.0848 | 35.2916  | -1.1336 | Down | 8.79E-31  | 5.46E-30  |

|               |                    |         |          |         |      |          |          |
|---------------|--------------------|---------|----------|---------|------|----------|----------|
| Unigene23276  | Potri.019G033600.1 | 4.8925  | 10.7354  | -1.1337 | Down | 4.04E-12 | 1.29E-11 |
| Unigene34277  | Potri.014G161800.6 | 9.4986  | 20.8414  | -1.1337 | Down | 1.83E-09 | 5.05E-09 |
| Unigene25082  | Potri.014G042700.3 | 8.7638  | 19.229   | -1.1337 | Down | 1.83E-09 | 5.05E-09 |
| Unigene33937  | Potri.011G020900.1 | 9.2258  | 20.2451  | -1.1338 | Down | 2.13E-17 | 8.59E-17 |
| Unigene28705  | Potri.005G259700.1 | 10.4373 | 22.9038  | -1.1338 | Down | 5.01E-20 | 2.23E-19 |
| Unigene48264  | Potri.001G255600.2 | 46.1696 | 101.3206 | -1.1339 | Down | 5.85E-41 | 4.70E-40 |
| Unigene23070  | Potri.016G001100.1 | 5.1778  | 11.3634  | -1.134  | Down | 1.08E-06 | 2.48E-06 |
| Unigene6756   | Potri.015G030800.1 | 17.8021 | 39.0689  | -1.134  | Down | 6.19E-20 | 2.75E-19 |
| Unigene39879  | Potri.012G128600.1 | 3.7719  | 8.2779   | -1.134  | Down | 1.08E-06 | 2.48E-06 |
| Unigene107210 | Potri.007G054900.1 | 1.3711  | 3.0091   | -1.134  | Down | 1.08E-06 | 2.48E-06 |
| Unigene49254  | Potri.004G155000.1 | 34.6277 | 75.9949  | -1.134  | Down | 4.96E-33 | 3.27E-32 |
| Unigene12851  | Potri.017G086600.1 | 32.6371 | 71.6379  | -1.1342 | Down | 1.01E-45 | 9.00E-45 |
| Unigene49037  | Potri.017G002900.1 | 13.8099 | 30.3127  | -1.1342 | Down | 2.24E-22 | 1.08E-21 |
| Unigene917    | Potri.010G172600.1 | 4.7241  | 10.3692  | -1.1342 | Down | 1.41E-14 | 5.03E-14 |
| Unigene102538 | Potri.014G177200.1 | 2.3096  | 5.0698   | -1.1343 | Down | 2.81E-09 | 7.69E-09 |
| Unigene51996  | Potri.004G092200.2 | 8.6129  | 18.9078  | -1.1344 | Down | 1.04E-37 | 7.74E-37 |
| Unigene7748   | Potri.017G120500.1 | 2.8279  | 6.209    | -1.1346 | Down | 3.48E-09 | 9.46E-09 |
| Unigene17546  | Potri.003G163000.1 | 11.3771 | 24.98    | -1.1346 | Down | 3.48E-09 | 9.46E-09 |
| Unigene29097  | Potri.019G032300.1 | 11.316  | 24.8476  | -1.1347 | Down | 9.91E-35 | 6.81E-34 |
| Unigene605    | Potri.005G122900.1 | 9.7211  | 21.3448  | -1.1347 | Down | 1.78E-19 | 7.79E-19 |
| Unigene17673  | Potri.001G310900.1 | 11.0013 | 24.1563  | -1.1347 | Down | 9.48E-12 | 2.97E-11 |
| Unigene24424  | Potri.016G051700.4 | 5.7384  | 12.6025  | -1.135  | Down | 4.31E-09 | 1.17E-08 |
| Unigene43752  | Potri.014G142800.4 | 5.4349  | 11.9359  | -1.135  | Down | 5.12E-42 | 4.21E-41 |
| Unigene108825 | Potri.009G135500.3 | 13.8541 | 30.4259  | -1.135  | Down | 4.31E-09 | 1.17E-08 |
| Unigene40040  | Potri.009G099500.1 | 3.3909  | 7.4469   | -1.135  | Down | 1.67E-06 | 3.78E-06 |
| Unigene43994  | Potri.007G082400.1 | 4.4554  | 9.7848   | -1.135  | Down | 4.31E-09 | 1.17E-08 |
| Unigene7932   | Potri.005G073800.1 | 3.9864  | 8.7562   | -1.1352 | Down | 4.07E-14 | 1.43E-13 |
| Unigene28979  | Potri.001G400300.3 | 5.48    | 12.0365  | -1.1352 | Down | 1.16E-16 | 4.55E-16 |
| Unigene72322  | Potri.018G105900.2 | 32.5918 | 71.5921  | -1.1353 | Down | 4.16E-19 | 1.79E-18 |
| Unigene45216  | Potri.006G183700.1 | 8.8457  | 19.4308  | -1.1353 | Down | 4.16E-19 | 1.79E-18 |
| Unigene42538  | Potri.006G143000.1 | 14.6834 | 32.255   | -1.1353 | Down | 2.56E-76 | 3.98E-75 |
| Unigene48119  | Potri.014G192800.1 | 38.426  | 84.4159  | -1.1354 | Down | 1.78E-31 | 1.13E-30 |
| Unigene45671  | Potri.002G161100.2 | 4.3483  | 9.552    | -1.1354 | Down | 1.44E-16 | 5.60E-16 |
| Unigene104384 | Potri.008G187000.1 | 6.9937  | 15.3649  | -1.1355 | Down | 2.08E-06 | 4.66E-06 |
| Unigene105777 | Potri.005G233000.4 | 4.2557  | 9.3496   | -1.1355 | Down | 2.08E-06 | 4.66E-06 |
| Unigene6747   | Potri.003G154000.1 | 4.455   | 9.7875   | -1.1355 | Down | 2.08E-06 | 4.66E-06 |
| Unigene86510  | Potri.006G165700.3 | 72.1289 | 158.4787 | -1.1356 | Down | 2.34E-58 | 2.70E-57 |
| Unigene92148  | Potri.003G151500.2 | 35.1821 | 77.2995  | -1.1356 | Down | 1.27E-43 | 1.08E-42 |
| Unigene1439   | Potri.013G042000.1 | 12.8918 | 28.3273  | -1.1357 | Down | 3.05E-26 | 1.66E-25 |

|               |                    |          |          |         |      |           |           |
|---------------|--------------------|----------|----------|---------|------|-----------|-----------|
| Unigene81817  | Potri.004G141400.2 | 58.6343  | 128.8428 | -1.1358 | Down | 6.38E-41  | 5.12E-40  |
| Unigene53154  | Potri.016G091200.1 | 12.0063  | 26.3877  | -1.1361 | Down | 8.22E-09  | 2.19E-08  |
| Unigene5233   | Potri.012G037900.1 | 14.4759  | 31.8155  | -1.1361 | Down | 7.77E-31  | 4.83E-30  |
| Unigene53444  | Potri.002G098000.5 | 6.2374   | 13.7087  | -1.1361 | Down | 2.59E-06  | 5.75E-06  |
| Unigene7527   | Potri.010G046000.4 | 19.2131  | 42.2296  | -1.1362 | Down | 3.55E-33  | 2.35E-32  |
| Unigene50555  | Potri.007G085300.3 | 12.109   | 26.6155  | -1.1362 | Down | 7.09E-26  | 3.81E-25  |
| Unigene29441  | Potri.018G151500.1 | 5.5725   | 12.2492  | -1.1363 | Down | 1.18E-13  | 4.05E-13  |
| Unigene13421  | Potri.003G031800.1 | 9.4584   | 20.7911  | -1.1363 | Down | 1.18E-13  | 4.05E-13  |
| Unigene10279  | Potri.009G028100.2 | 12.6461  | 27.7994  | -1.1364 | Down | 3.42E-11  | 1.04E-10  |
| Unigene15047  | Potri.001G015400.2 | 15.2589  | 33.543   | -1.1364 | Down | 3.42E-11  | 1.04E-10  |
| Unigene1894   | Potri.006G146600.2 | 7.5988   | 16.7057  | -1.1365 | Down | 8.15E-21  | 3.73E-20  |
| Unigene13343  | Potri.003G065500.1 | 9.2736   | 20.3875  | -1.1365 | Down | 4.90E-28  | 2.81E-27  |
| Unigene18177  | Potri.011G059300.1 | 2.8647   | 6.2986   | -1.1366 | Down | 3.21E-06  | 7.10E-06  |
| Unigene40597  | Potri.002G088800.1 | 19.7401  | 43.4     | -1.1366 | Down | 2.26E-18  | 9.48E-18  |
| Unigene7557   | Potri.001G174900.2 | 9.5327   | 20.9584  | -1.1366 | Down | 2.26E-18  | 9.48E-18  |
| Unigene7777   | Potri.013G001200.1 | 5.1512   | 11.3265  | -1.1367 | Down | 4.51E-23  | 2.22E-22  |
| Unigene11342  | Potri.012G129800.1 | 11.4101  | 25.0888  | -1.1367 | Down | 2.80E-18  | 1.17E-17  |
| Unigene1352   | Potri.001G152000.2 | 5.3161   | 11.6894  | -1.1368 | Down | 1.80E-13  | 6.15E-13  |
| Unigene60621  | Potri.011G138400.1 | 239.1933 | 525.9987 | -1.1369 | Down | 5.19E-148 | 1.83E-146 |
| Unigene30309  | Potri.011G065700.8 | 13.9229  | 30.6173  | -1.1369 | Down | 2.51E-25  | 1.33E-24  |
| Unigene33385  | Potri.008G193900.1 | 21.9144  | 48.1899  | -1.1369 | Down | 4.19E-30  | 2.55E-29  |
| Unigene22169  | Potri.001G048100.3 | 6.3618   | 13.9897  | -1.1369 | Down | 7.85E-16  | 2.96E-15  |
| Unigene42425  | Potri.019G029400.1 | 16.0989  | 35.4042  | -1.137  | Down | 2.65E-98  | 5.55E-97  |
| Unigene2686   | Potri.017G009800.1 | 3.7895   | 8.334    | -1.137  | Down | 2.23E-13  | 7.57E-13  |
| Unigene28866  | Potri.001G343700.1 | 2.7      | 5.9378   | -1.137  | Down | 5.24E-11  | 1.58E-10  |
| Unigene2823   | Potri.012G100500.2 | 10.1002  | 22.2147  | -1.1371 | Down | 3.83E-25  | 2.02E-24  |
| Unigene6848   | Potri.001G191100.1 | 36.6352  | 80.5749  | -1.1371 | Down | 2.81E-39  | 2.17E-38  |
| Unigene23989  | Potri.012G020000.1 | 11.007   | 24.2097  | -1.1372 | Down | 1.65E-34  | 1.13E-33  |
| Unigene26514  | Potri.014G096500.1 | 24.6706  | 54.2658  | -1.1373 | Down | 5.28E-18  | 2.18E-17  |
| Unigene85133  | Potri.007G089200.1 | 15.6502  | 34.4244  | -1.1373 | Down | 2.76E-13  | 9.34E-13  |
| Unigene74987  | Potri.005G258000.1 | 8.2127   | 18.0649  | -1.1373 | Down | 4.00E-06  | 8.74E-06  |
| Unigene110874 | Potri.005G090100.2 | 11.8307  | 26.023   | -1.1373 | Down | 1.57E-08  | 4.10E-08  |
| Unigene67258  | Potri.018G023900.3 | 7.0029   | 15.407   | -1.1376 | Down | 8.03E-11  | 2.40E-10  |
| Unigene22005  | Potri.014G160500.1 | 30.4014  | 66.8869  | -1.1376 | Down | 8.45E-62  | 1.04E-60  |
| Unigene44076  | Potri.014G138000.2 | 21.4739  | 47.2463  | -1.1376 | Down | 5.64E-41  | 4.53E-40  |
| Unigene37877  | Potri.011G089200.2 | 9.9186   | 21.8234  | -1.1377 | Down | 1.95E-08  | 5.06E-08  |
| Unigene49167  | Potri.006G263300.1 | 13.6861  | 30.1129  | -1.1377 | Down | 1.83E-15  | 6.82E-15  |
| Unigene74577  | Potri.013G059100.2 | 16.2322  | 35.7202  | -1.1379 | Down | 9.95E-11  | 2.96E-10  |
| Unigene23119  | Potri.010G001100.1 | 2.2976   | 5.0561   | -1.1379 | Down | 4.97E-06  | 1.08E-05  |

|               |                    |         |         |         |      |          |          |
|---------------|--------------------|---------|---------|---------|------|----------|----------|
| Unigene45500  | Potri.008G069000.2 | 15.2608 | 33.5824 | -1.1379 | Down | 2.30E-38 | 1.74E-37 |
| Unigene31997  | Potri.006G245800.1 | 3.9668  | 8.7297  | -1.138  | Down | 3.02E-22 | 1.45E-21 |
| Unigene24267  | Potri.006G109700.1 | 10.4403 | 22.9767 | -1.138  | Down | 5.23E-13 | 1.75E-12 |
| Unigene20443  | Potri.004G078200.3 | 10.036  | 22.0874 | -1.138  | Down | 6.76E-20 | 3.00E-19 |
| Unigene111156 | Potri.001G172400.3 | 18.9741 | 41.7577 | -1.138  | Down | 5.23E-13 | 1.75E-12 |
| Unigene85871  | Potri.017G129300.3 | 17.7617 | 39.0917 | -1.1381 | Down | 2.81E-15 | 1.03E-14 |
| Unigene94094  | Potri.008G145900.1 | 3.5236  | 7.755   | -1.1381 | Down | 2.41E-08 | 6.23E-08 |
| Unigene14634  | Potri.014G138700.3 | 18.331  | 40.3569 | -1.1385 | Down | 8.01E-13 | 2.65E-12 |
| Unigene98830  | Potri.014G087900.1 | 2.4407  | 5.3733  | -1.1385 | Down | 6.19E-06 | 1.34E-05 |
| Unigene64757  | Potri.014G000600.1 | 3.3059  | 7.2782  | -1.1385 | Down | 6.19E-06 | 1.34E-05 |
| Unigene39066  | Potri.013G104400.1 | 5.5707  | 12.2643 | -1.1385 | Down | 6.19E-06 | 1.34E-05 |
| Unigene6034   | Potri.010G181900.1 | 25.0845 | 55.2253 | -1.1385 | Down | 3.91E-24 | 1.99E-23 |
| Unigene17289  | Potri.007G027500.3 | 8.7989  | 19.3713 | -1.1385 | Down | 1.53E-10 | 4.49E-10 |
| Unigene25270  | Potri.001G451000.1 | 25.109  | 55.2792 | -1.1385 | Down | 4.29E-15 | 1.57E-14 |
| Unigene24214  | Potri.003G014800.2 | 18.383  | 40.4727 | -1.1386 | Down | 6.12E-69 | 8.45E-68 |
| Unigene45301  | Potri.018G018800.1 | 3.6468  | 8.0313  | -1.139  | Down | 6.56E-15 | 2.38E-14 |
| Unigene38329  | Potri.015G010900.1 | 17.7664 | 39.1277 | -1.139  | Down | 2.41E-19 | 1.05E-18 |
| Unigene10110  | Potri.004G207300.6 | 6.4539  | 14.2131 | -1.139  | Down | 3.71E-08 | 9.49E-08 |
| Unigene63899  | Potri.004G186500.2 | 5.8307  | 12.8408 | -1.139  | Down | 3.71E-08 | 9.49E-08 |
| Unigene9803   | Potri.002G237900.1 | 6.7278  | 14.8163 | -1.139  | Down | 3.71E-08 | 9.49E-08 |
| Unigene8348   | Potri.014G161600.1 | 5.6514  | 12.4479 | -1.1392 | Down | 2.34E-10 | 6.81E-10 |
| Unigene38678  | Potri.006G206100.2 | 15.6161 | 34.3985 | -1.1393 | Down | 5.43E-17 | 2.16E-16 |
| Unigene1648   | Potri.019G034900.1 | 12.3963 | 27.3069 | -1.1394 | Down | 1.52E-12 | 4.95E-12 |
| Unigene26176  | Potri.008G080500.1 | 14.3625 | 31.6401 | -1.1394 | Down | 1.00E-14 | 3.62E-14 |
| Unigene78150  | Potri.003G039800.2 | 35.5536 | 78.3184 | -1.1394 | Down | 1.39E-23 | 6.94E-23 |
| Unigene31622  | Potri.002G084400.1 | 39.6239 | 87.2866 | -1.1394 | Down | 1.02E-36 | 7.37E-36 |
| Unigene1318   | Potri.006G241900.4 | 3.6166  | 7.9673  | -1.1395 | Down | 4.61E-08 | 1.17E-07 |
| Unigene84724  | Potri.006G229900.3 | 32.521  | 71.6469 | -1.1395 | Down | 1.18E-25 | 6.29E-25 |
| Unigene14794  | Potri.008G077100.1 | 19.3003 | 42.5216 | -1.1396 | Down | 4.54E-19 | 1.95E-18 |
| Unigene40462  | Potri.008G150500.2 | 16.9283 | 37.3001 | -1.1397 | Down | 5.61E-19 | 2.41E-18 |
| Unigene50847  | Potri.005G094300.1 | 21.8339 | 48.1079 | -1.1397 | Down | 6.97E-30 | 4.22E-29 |
| Unigene21080  | Potri.003G077000.1 | 21.7347 | 47.8899 | -1.1397 | Down | 8.30E-17 | 3.27E-16 |
| Unigene29093  | Potri.002G227500.1 | 4.9708  | 10.9523 | -1.1397 | Down | 1.24E-14 | 4.45E-14 |
| Unigene44370  | Potri.019G051200.1 | 19.6282 | 43.2518 | -1.1398 | Down | 4.17E-34 | 2.82E-33 |
| Unigene34111  | Potri.010G084800.1 | 28.8544 | 63.5814 | -1.1398 | Down | 8.60E-30 | 5.19E-29 |
| Unigene54095  | Potri.T002400.1    | 7.563   | 16.6667 | -1.1399 | Down | 9.59E-06 | 2.03E-05 |
| Unigene28423  | Potri.011G090800.1 | 6.6715  | 14.7019 | -1.1399 | Down | 3.59E-10 | 1.04E-09 |
| Unigene76867  | Potri.006G107300.3 | 7.1982  | 15.8626 | -1.1399 | Down | 9.59E-06 | 2.03E-05 |
| Unigene27599  | Potri.005G002800.2 | 4.4237  | 9.7484  | -1.1399 | Down | 9.59E-06 | 2.03E-05 |

|               |                    |         |          |         |      |           |           |
|---------------|--------------------|---------|----------|---------|------|-----------|-----------|
| Unigene39959  | Potri.004G106700.1 | 7.3596  | 16.2182  | -1.1399 | Down | 3.59E-10  | 1.04E-09  |
| Unigene1287   | Potri.004G037000.1 | 5.8336  | 12.8555  | -1.1399 | Down | 1.54E-14  | 5.48E-14  |
| Unigene51694  | Potri.004G087100.3 | 23.0114 | 50.7176  | -1.1401 | Down | 1.27E-16  | 4.96E-16  |
| Unigene21492  | Potri.008G215200.1 | 8.239   | 18.1596  | -1.1402 | Down | 6.75E-36  | 4.79E-35  |
| Unigene139    | Potri.005G092700.2 | 6.4455  | 14.2071  | -1.1402 | Down | 1.39E-31  | 8.81E-31  |
| Unigene13678  | Potri.001G057500.1 | 72.8889 | 160.6531 | -1.1402 | Down | 2.72E-89  | 5.04E-88  |
| Unigene37932  | Potri.004G182900.2 | 14.8176 | 32.6619  | -1.1403 | Down | 4.45E-10  | 1.28E-09  |
| Unigene53317  | Potri.018G030500.5 | 7.5294  | 16.5982  | -1.1404 | Down | 7.09E-08  | 1.78E-07  |
| Unigene50138  | Potri.007G104000.1 | 15.8809 | 35.008   | -1.1404 | Down | 1.03E-35  | 7.26E-35  |
| Unigene28223  | Potri.006G204900.3 | 37.8824 | 83.5099  | -1.1404 | Down | 3.56E-27  | 1.99E-26  |
| Unigene54229  | Potri.006G078200.1 | 11.4362 | 25.2105  | -1.1404 | Down | 7.09E-08  | 1.78E-07  |
| Unigene21585  | Potri.005G092900.1 | 11.3087 | 24.9302  | -1.1405 | Down | 5.16E-25  | 2.70E-24  |
| Unigene12573  | Potri.018G034700.2 | 15.6456 | 34.4941  | -1.1406 | Down | 9.46E-40  | 7.37E-39  |
| Unigene8618   | Potri.009G134900.2 | 2.7534  | 6.0709   | -1.1407 | Down | 5.52E-10  | 1.57E-09  |
| Unigene31509  | Potri.008G135500.2 | 7.1602  | 15.787   | -1.1407 | Down | 1.19E-05  | 2.51E-05  |
| Unigene48768  | Potri.008G059500.3 | 18.542  | 40.8821  | -1.1407 | Down | 1.62E-18  | 6.81E-18  |
| Unigene15162  | Potri.001G056700.9 | 4.9965  | 11.0165  | -1.1407 | Down | 1.19E-05  | 2.51E-05  |
| Unigene11476  | Potri.015G130900.1 | 12.2637 | 27.0412  | -1.1408 | Down | 1.36E-20  | 6.16E-20  |
| Unigene47521  | Potri.002G090900.2 | 20.3164 | 44.8022  | -1.1409 | Down | 3.59E-14  | 1.26E-13  |
| Unigene48122  | Potri.001G117200.1 | 10.2016 | 22.4968  | -1.1409 | Down | 8.80E-08  | 2.19E-07  |
| Unigene7931   | Potri.003G221100.2 | 7.7999  | 17.2017  | -1.141  | Down | 1.20E-24  | 6.21E-24  |
| Unigene13123  | Potri.018G098400.3 | 10.922  | 24.0889  | -1.1411 | Down | 1.75E-22  | 8.44E-22  |
| Unigene69498  | Potri.010G100100.1 | 8.8057  | 19.4214  | -1.1411 | Down | 5.46E-12  | 1.73E-11  |
| Unigene39552  | Potri.007G001300.1 | 9.8199  | 21.658   | -1.1411 | Down | 4.72E-62  | 5.82E-61  |
| Unigene24421  | Potri.005G083800.1 | 6.0853  | 13.4208  | -1.1411 | Down | 2.47E-18  | 1.03E-17  |
| Unigene1260   | Potri.002G169100.2 | 24.5926 | 54.2396  | -1.1411 | Down | 1.15E-51  | 1.17E-50  |
| Unigene18108  | Potri.010G042900.1 | 13.3389 | 29.4218  | -1.1412 | Down | 2.02E-49  | 1.95E-48  |
| Unigene44747  | Potri.008G073500.2 | 6.4188  | 14.1574  | -1.1412 | Down | 4.44E-14  | 1.56E-13  |
| Unigene57118  | Potri.003G077600.1 | 5.5817  | 12.3115  | -1.1412 | Down | 3.66E-16  | 1.40E-15  |
| Unigene22105  | Potri.002G081900.1 | 26.1715 | 57.7246  | -1.1412 | Down | 1.26E-26  | 6.94E-26  |
| Unigene10949  | Potri.010G122500.7 | 42.6399 | 94.0628  | -1.1414 | Down | 9.72E-103 | 2.15E-101 |
| Unigene998    | Potri.008G132200.2 | 2.8657  | 6.3218   | -1.1414 | Down | 1.09E-07  | 2.70E-07  |
| Unigene101902 | Potri.003G151300.2 | 6.6381  | 14.6438  | -1.1414 | Down | 1.49E-05  | 3.09E-05  |
| Unigene53349  | Potri.013G099200.2 | 24.3395 | 53.6938  | -1.1415 | Down | 2.26E-24  | 1.16E-23  |
| Unigene55852  | Potri.012G119000.1 | 2.9502  | 6.5083   | -1.1415 | Down | 1.49E-05  | 3.09E-05  |
| Unigene46572  | Potri.009G014700.2 | 30.6172 | 67.5426  | -1.1415 | Down | 1.92E-26  | 1.05E-25  |
| Unigene23916  | Potri.007G061700.1 | 2.8718  | 6.3353   | -1.1415 | Down | 8.47E-10  | 2.39E-09  |
| Unigene12653  | Potri.006G252300.1 | 9.5175  | 20.9959  | -1.1415 | Down | 2.67E-22  | 1.28E-21  |
| Unigene23809  | Potri.006G084000.2 | 29.7727 | 65.6839  | -1.1415 | Down | 1.11E-36  | 8.02E-36  |

|               |                    |         |          |         |      |          |          |
|---------------|--------------------|---------|----------|---------|------|----------|----------|
| Unigene10956  | Potri.006G036800.1 | 9.8045  | 21.6311  | -1.1416 | Down | 2.79E-24 | 1.43E-23 |
| Unigene6966   | Potri.010G092900.1 | 24.0953 | 53.1649  | -1.1417 | Down | 2.93E-26 | 1.60E-25 |
| Unigene23614  | Potri.001G010700.2 | 10.8534 | 23.9477  | -1.1417 | Down | 3.45E-24 | 1.76E-23 |
| Unigene10365  | Potri.018G078700.1 | 20.0473 | 44.2349  | -1.1418 | Down | 4.07E-22 | 1.94E-21 |
| Unigene10309  | Potri.016G096900.2 | 14.7369 | 32.5205  | -1.1419 | Down | 6.93E-16 | 2.62E-15 |
| Unigene33553  | Potri.016G037500.2 | 10.9733 | 24.2148  | -1.1419 | Down | 4.26E-24 | 2.17E-23 |
| Unigene17704  | Potri.008G113600.1 | 14.6968 | 32.4321  | -1.1419 | Down | 6.93E-16 | 2.62E-15 |
| Unigene43063  | Potri.015G047900.1 | 8.0391  | 17.7411  | -1.142  | Down | 5.96E-20 | 2.65E-19 |
| Unigene66765  | Potri.006G249700.2 | 1.5125  | 3.3378   | -1.142  | Down | 1.36E-07 | 3.33E-07 |
| Unigene33602  | Potri.005G005900.1 | 3.381   | 7.4613   | -1.142  | Down | 1.36E-07 | 3.33E-07 |
| Unigene18581  | Potri.004G095000.1 | 4.3799  | 9.6658   | -1.142  | Down | 1.36E-07 | 3.33E-07 |
| Unigene33519  | Potri.003G180500.2 | 2.984   | 6.5852   | -1.142  | Down | 1.36E-07 | 3.33E-07 |
| Unigene9173   | Potri.003G067700.4 | 21.7143 | 47.9204  | -1.142  | Down | 8.41E-14 | 2.91E-13 |
| Unigene44225  | Potri.001G201000.1 | 3.2389  | 7.1478   | -1.142  | Down | 1.36E-07 | 3.33E-07 |
| Unigene42557  | Potri.014G050300.1 | 10.5224 | 23.2228  | -1.1421 | Down | 4.72E-28 | 2.71E-27 |
| Unigene114789 | Potri.019G131200.1 | 25.0015 | 55.1819  | -1.1422 | Down | 7.37E-20 | 3.27E-19 |
| Unigene13326  | Potri.016G066500.1 | 18.5649 | 40.9779  | -1.1423 | Down | 5.60E-34 | 3.78E-33 |
| Unigene100944 | Potri.015G037600.1 | 5.837   | 12.8838  | -1.1423 | Down | 1.85E-05 | 3.81E-05 |
| Unigene36107  | Potri.010G087600.1 | 2.5488  | 5.6259   | -1.1423 | Down | 1.85E-05 | 3.81E-05 |
| Unigene27682  | Potri.009G092500.4 | 2.7357  | 6.0386   | -1.1423 | Down | 1.85E-05 | 3.81E-05 |
| Unigene22012  | Potri.004G159800.2 | 11.1716 | 24.6613  | -1.1424 | Down | 8.43E-26 | 4.51E-25 |
| Unigene83132  | Potri.006G065100.1 | 45.5418 | 100.5383 | -1.1425 | Down | 8.53E-34 | 5.73E-33 |
| Unigene29040  | Potri.003G109400.2 | 7.4968  | 16.5515  | -1.1426 | Down | 1.17E-21 | 5.51E-21 |
| Unigene47400  | Potri.002G191300.1 | 42.1913 | 93.1506  | -1.1426 | Down | 1.12E-35 | 7.90E-35 |
| Unigene9420   | Potri.009G118500.3 | 26.2719 | 58.0065  | -1.1427 | Down | 1.34E-17 | 5.46E-17 |
| Unigene17252  | Potri.014G028900.5 | 9.0446  | 19.9718  | -1.1428 | Down | 1.59E-13 | 5.44E-13 |
| Unigene17961  | Potri.002G139500.1 | 9.1361  | 20.1739  | -1.1428 | Down | 1.59E-13 | 5.44E-13 |
| Unigene46294  | Potri.002G257100.1 | 33.2572 | 73.4419  | -1.1429 | Down | 1.72E-19 | 7.51E-19 |
| Unigene13872  | Potri.001G075700.4 | 5.2471  | 11.5875  | -1.143  | Down | 1.87E-23 | 9.30E-23 |
| Unigene7596   | Potri.010G029000.1 | 5.272   | 11.6438  | -1.1431 | Down | 2.00E-09 | 5.51E-09 |
| Unigene79420  | Potri.009G073400.1 | 9.2478  | 20.4247  | -1.1431 | Down | 2.09E-07 | 5.06E-07 |
| Unigene64850  | Potri.007G143600.1 | 5.0067  | 11.0577  | -1.1431 | Down | 2.31E-05 | 4.71E-05 |
| Unigene108000 | Potri.005G250000.1 | 10.9705 | 24.2293  | -1.1431 | Down | 2.09E-07 | 5.06E-07 |
| Unigene2703   | Potri.005G130500.1 | 3.1278  | 6.9081   | -1.1431 | Down | 2.31E-05 | 4.71E-05 |
| Unigene25560  | Potri.004G176300.1 | 14.6993 | 32.4649  | -1.1431 | Down | 2.00E-09 | 5.51E-09 |
| Unigene21392  | Potri.001G207000.1 | 13.6713 | 30.1978  | -1.1433 | Down | 6.76E-45 | 5.91E-44 |
| Unigene42541  | Potri.017G017200.1 | 21.927  | 48.4378  | -1.1434 | Down | 8.55E-84 | 1.48E-82 |
| Unigene17509  | Potri.010G060500.1 | 8.9489  | 19.7685  | -1.1434 | Down | 2.44E-13 | 8.25E-13 |
| Unigene47287  | Potri.002G089300.1 | 67.1392 | 148.3085 | -1.1434 | Down | 1.69E-58 | 1.96E-57 |

|               |                    |          |          |         |      |           |           |
|---------------|--------------------|----------|----------|---------|------|-----------|-----------|
| Unigene666    | Potri.018G053800.5 | 16.8939  | 37.3221  | -1.1435 | Down | 7.91E-37  | 5.76E-36  |
| Unigene44884  | Potri.002G009100.1 | 51.6075  | 114.0116 | -1.1435 | Down | 1.09E-114 | 2.77E-113 |
| Unigene16753  | Potri.018G102500.1 | 44.7388  | 98.8489  | -1.1437 | Down | 1.93E-44  | 1.67E-43  |
| Unigene22310  | Potri.004G047700.1 | 9.3101   | 20.5702  | -1.1437 | Down | 8.64E-33  | 5.67E-32  |
| Unigene23987  | Potri.002G058800.1 | 11.9968  | 26.5058  | -1.1437 | Down | 1.37E-40  | 1.09E-39  |
| Unigene38945  | Potri.001G115500.1 | 22.681   | 50.1122  | -1.1437 | Down | 5.92E-27  | 3.29E-26  |
| Unigene53387  | Potri.014G178300.1 | 21.7652  | 48.0935  | -1.1438 | Down | 7.31E-27  | 4.05E-26  |
| Unigene78536  | Potri.010G212300.3 | 200.6621 | 443.3937 | -1.1438 | Down | 2.40E-127 | 6.92E-126 |
| Unigene31147  | Potri.014G121200.1 | 20.8204  | 46.0078  | -1.1439 | Down | 6.95E-25  | 3.62E-24  |
| Unigene29835  | Potri.001G353700.7 | 29.2253  | 64.58    | -1.1439 | Down | 1.40E-34  | 9.58E-34  |
| Unigene107036 | Potri.015G066500.1 | 2.9269   | 6.4684   | -1.144  | Down | 2.87E-05  | 5.80E-05  |
| Unigene49393  | Potri.006G106800.1 | 3.4553   | 7.6361   | -1.144  | Down | 2.87E-05  | 5.80E-05  |
| Unigene39705  | Potri.004G081700.1 | 7.8738   | 17.4009  | -1.144  | Down | 4.79E-17  | 1.91E-16  |
| Unigene21956  | Potri.008G078600.1 | 13.8586  | 30.6295  | -1.1441 | Down | 2.80E-36  | 2.00E-35  |
| Unigene28166  | Potri.006G213900.1 | 19.8194  | 43.8051  | -1.1442 | Down | 9.64E-48  | 9.00E-47  |
| Unigene82339  | Potri.006G130900.1 | 186.4977 | 412.2075 | -1.1442 | Down | 6.54E-130 | 1.94E-128 |
| Unigene30939  | Potri.001G101400.1 | 6.7501   | 14.9195  | -1.1442 | Down | 3.73E-11  | 1.13E-10  |
| Unigene7011   | Potri.005G227100.1 | 7.2112   | 15.9401  | -1.1443 | Down | 3.22E-07  | 7.70E-07  |
| Unigene5875   | Potri.014G191100.6 | 11.0041  | 24.3267  | -1.1445 | Down | 3.80E-09  | 1.03E-08  |
| Unigene305    | Potri.007G071000.1 | 10.3352  | 22.8474  | -1.1445 | Down | 2.88E-30  | 1.76E-29  |
| Unigene3268   | Potri.013G042000.1 | 39.0673  | 86.3696  | -1.1446 | Down | 2.09E-45  | 1.85E-44  |
| Unigene71564  | Potri.003G110000.5 | 17.6392  | 38.9975  | -1.1446 | Down | 4.62E-11  | 1.40E-10  |
| Unigene33474  | Potri.014G111000.1 | 10.7643  | 23.801   | -1.1448 | Down | 1.15E-18  | 4.88E-18  |
| Unigene34078  | Potri.004G210200.6 | 23.1227  | 51.13    | -1.1449 | Down | 7.09E-32  | 4.54E-31  |
| Unigene70417  | Potri.001G362100.1 | 9.0257   | 19.9583  | -1.1449 | Down | 1.60E-37  | 1.18E-36  |
| Unigene3199   | Potri.013G023100.1 | 16.0027  | 35.3889  | -1.145  | Down | 8.85E-15  | 3.19E-14  |
| Unigene41815  | Potri.012G066700.2 | 3.1015   | 6.8587   | -1.145  | Down | 3.58E-05  | 7.17E-05  |
| Unigene44795  | Potri.010G210100.1 | 4.832    | 10.6856  | -1.145  | Down | 4.00E-07  | 9.50E-07  |
| Unigene41961  | Potri.008G194200.3 | 9.9816   | 22.0736  | -1.145  | Down | 4.71E-09  | 1.27E-08  |
| Unigene30463  | Potri.006G279900.1 | 6.8143   | 15.0695  | -1.145  | Down | 4.00E-07  | 9.50E-07  |
| Unigene25815  | Potri.006G264200.1 | 2.6151   | 5.7831   | -1.145  | Down | 3.58E-05  | 7.17E-05  |
| Unigene36596  | Potri.004G159800.2 | 6.2532   | 13.8284  | -1.145  | Down | 4.00E-07  | 9.50E-07  |
| Unigene21572  | Potri.004G121400.2 | 27.7714  | 61.4164  | -1.145  | Down | 3.84E-86  | 6.85E-85  |
| Unigene23636  | Potri.003G143700.5 | 4.8251   | 10.6705  | -1.145  | Down | 1.12E-16  | 4.38E-16  |
| Unigene14483  | Potri.003G052200.3 | 6.356    | 14.0558  | -1.145  | Down | 3.58E-05  | 7.17E-05  |
| Unigene10868  | Potri.019G071700.1 | 14.1627  | 31.3242  | -1.1452 | Down | 1.28E-74  | 1.94E-73  |
| Unigene6535   | Potri.015G129300.1 | 4.5753   | 10.1198  | -1.1452 | Down | 1.38E-16  | 5.40E-16  |
| Unigene32058  | Potri.014G137700.2 | 12.4045  | 27.4383  | -1.1453 | Down | 1.38E-44  | 1.20E-43  |
| Unigene44988  | Potri.010G077700.1 | 9.5479   | 21.1187  | -1.1453 | Down | 6.43E-41  | 5.16E-40  |

|               |                     |         |          |         |      |          |          |
|---------------|---------------------|---------|----------|---------|------|----------|----------|
| Unigene28918  | Potri.006G169700.1  | 6.4698  | 14.3104  | -1.1453 | Down | 1.09E-14 | 3.94E-14 |
| Unigene72435  | Potri.013G128300.10 | 33.8759 | 74.9347  | -1.1454 | Down | 2.79E-20 | 1.25E-19 |
| Unigene87390  | Potri.006G021100.1  | 31.1422 | 68.8889  | -1.1454 | Down | 9.66E-28 | 5.49E-27 |
| Unigene67558  | Potri.005G181900.1  | 6.7949  | 15.0305  | -1.1454 | Down | 7.08E-11 | 2.12E-10 |
| Unigene50334  | Potri.004G123800.1  | 9.0824  | 20.0926  | -1.1455 | Down | 4.43E-22 | 2.11E-21 |
| Unigene15933  | Potri.004G121400.2  | 43.2153 | 95.6019  | -1.1455 | Down | 2.10E-44 | 1.82E-43 |
| Unigene77324  | Potri.001G150300.1  | 12.1629 | 26.9066  | -1.1455 | Down | 5.84E-09 | 1.57E-08 |
| Unigene47274  | Potri.015G117800.1  | 9.8994  | 21.9019  | -1.1456 | Down | 4.97E-07 | 1.17E-06 |
| Unigene21090  | Potri.003G078900.1  | 5.196   | 11.4958  | -1.1456 | Down | 4.97E-07 | 1.17E-06 |
| Unigene16651  | Potri.001G224700.1  | 79.7746 | 176.5073 | -1.1457 | Down | 5.21E-46 | 4.68E-45 |
| Unigene44834  | Potri.004G122100.2  | 13.7927 | 30.5184  | -1.1458 | Down | 4.26E-20 | 1.90E-19 |
| Unigene17854  | Potri.018G005700.2  | 3.8766  | 8.5789   | -1.146  | Down | 4.46E-05 | 8.87E-05 |
| Unigene44572  | Potri.013G019200.1  | 6.1474  | 13.6039  | -1.146  | Down | 7.25E-09 | 1.93E-08 |
| Unigene8269   | Potri.008G194200.1  | 13.8563 | 30.6634  | -1.146  | Down | 5.26E-20 | 2.34E-19 |
| Unigene2532   | Potri.006G125800.1  | 2.255   | 4.9903   | -1.146  | Down | 4.46E-05 | 8.87E-05 |
| Unigene3034   | Potri.005G235000.1  | 9.6633  | 21.3849  | -1.146  | Down | 3.67E-73 | 5.42E-72 |
| Unigene18279  | Potri.015G067600.1  | 14.0629 | 31.123   | -1.1461 | Down | 9.21E-55 | 9.91E-54 |
| Unigene20652  | Potri.008G034700.4  | 15.2267 | 33.6996  | -1.1461 | Down | 2.07E-14 | 7.36E-14 |
| Unigene87076  | Potri.018G023700.1  | 17.6303 | 39.0223  | -1.1462 | Down | 3.23E-16 | 1.24E-15 |
| Unigene39738  | Potri.001G242200.1  | 19.6525 | 43.498   | -1.1462 | Down | 7.19E-31 | 4.47E-30 |
| Unigene21768  | Potri.017G000500.1  | 9.9105  | 21.9369  | -1.1463 | Down | 1.66E-12 | 5.39E-12 |
| Unigene27507  | Potri.003G053100.1  | 35.8336 | 79.3175  | -1.1463 | Down | 1.65E-23 | 8.21E-23 |
| Unigene72447  | Potri.001G129700.1  | 19.821  | 43.8737  | -1.1463 | Down | 1.66E-12 | 5.39E-12 |
| Unigene19465  | Potri.008G086400.2  | 38.4606 | 85.1395  | -1.1464 | Down | 2.63E-54 | 2.80E-53 |
| Unigene79259  | Potri.006G279400.2  | 59.4316 | 131.5607 | -1.1464 | Down | 8.01E-40 | 6.26E-39 |
| Unigene35291  | Potri.012G133600.4  | 12.1224 | 26.838   | -1.1466 | Down | 1.34E-10 | 3.97E-10 |
| Unigene21334  | Potri.011G041500.1  | 6.7697  | 14.9872  | -1.1466 | Down | 5.22E-27 | 2.90E-26 |
| Unigene10929  | Potri.010G037600.3  | 5.6073  | 12.414   | -1.1466 | Down | 8.39E-29 | 4.93E-28 |
| Unigene30318  | Potri.009G149300.4  | 51.0415 | 113.002  | -1.1466 | Down | 7.51E-38 | 5.60E-37 |
| Unigene9442   | Potri.001G068400.1  | 4.594   | 10.1712  | -1.1467 | Down | 2.05E-12 | 6.64E-12 |
| Unigene33751  | Potri.015G019800.4  | 15.4086 | 34.1174  | -1.1468 | Down | 1.67E-30 | 1.03E-29 |
| Unigene107858 | Potri.012G002100.6  | 86.3586 | 191.2262 | -1.1469 | Down | 2.13E-48 | 2.01E-47 |
| Unigene3149   | Potri.003G145900.3  | 13.8849 | 30.7461  | -1.1469 | Down | 1.28E-28 | 7.45E-28 |
| Unigene21631  | Potri.011G092200.1  | 7.1807  | 15.9022  | -1.147  | Down | 1.11E-08 | 2.93E-08 |
| Unigene943    | Potri.009G118500.3  | 4.656   | 10.311   | -1.147  | Down | 1.67E-10 | 4.89E-10 |
| Unigene413    | Potri.008G181200.2  | 5.9334  | 13.1401  | -1.147  | Down | 6.12E-25 | 3.20E-24 |
| Unigene11027  | Potri.007G127900.1  | 11.9891 | 26.5509  | -1.147  | Down | 3.92E-14 | 1.37E-13 |
| Unigene52627  | Potri.006G138500.1  | 21.3924 | 47.3752  | -1.147  | Down | 6.12E-25 | 3.20E-24 |
| Unigene5892   | Potri.004G235900.1  | 22.3797 | 49.5618  | -1.147  | Down | 6.10E-16 | 2.31E-15 |



|              |                    |         |          |         |      |          |          |
|--------------|--------------------|---------|----------|---------|------|----------|----------|
| Unigene8942  | Potri.003G201100.1 | 14.1644 | 31.3682  | -1.147  | Down | 1.67E-10 | 4.89E-10 |
| Unigene30919 | Potri.003G077600.1 | 5.0481  | 11.1793  | -1.147  | Down | 5.56E-05 | 1.09E-04 |
| Unigene49253 | Potri.002G252600.1 | 29.593  | 65.5362  | -1.147  | Down | 2.54E-30 | 1.56E-29 |
| Unigene44819 | Potri.002G049600.1 | 2.5773  | 5.7077   | -1.147  | Down | 1.11E-08 | 2.93E-08 |
| Unigene3260  | Potri.001G417200.1 | 2.3766  | 5.2632   | -1.147  | Down | 5.56E-05 | 1.09E-04 |
| Unigene88028 | Potri.001G253400.1 | 24.7138 | 54.7308  | -1.147  | Down | 3.83E-23 | 1.89E-22 |
| Unigene48531 | Potri.001G201000.1 | 3.6991  | 8.192    | -1.147  | Down | 5.56E-05 | 1.09E-04 |
| Unigene3006  | Potri.002G186100.1 | 18.8638 | 41.7813  | -1.1472 | Down | 1.16E-58 | 1.35E-57 |
| Unigene30011 | Potri.007G000500.6 | 5.7526  | 12.7423  | -1.1473 | Down | 1.50E-26 | 8.21E-26 |
| Unigene18380 | Potri.017G047600.1 | 3.7875  | 8.3896   | -1.1474 | Down | 4.84E-14 | 1.69E-13 |
| Unigene47482 | Potri.016G032400.2 | 58.3695 | 129.2982 | -1.1474 | Down | 1.73E-42 | 1.44E-41 |
| Unigene84790 | Potri.005G253100.3 | 11.7718 | 26.0776  | -1.1475 | Down | 2.06E-10 | 6.03E-10 |
| Unigene52822 | Potri.001G295200.1 | 28.7359 | 63.6607  | -1.1475 | Down | 9.53E-32 | 6.07E-31 |
| Unigene20591 | Potri.015G043100.2 | 7.0809  | 15.6873  | -1.1476 | Down | 1.38E-08 | 3.62E-08 |
| Unigene29539 | Potri.008G050800.1 | 27.1269 | 60.0987  | -1.1476 | Down | 2.64E-42 | 2.18E-41 |
| Unigene33309 | Potri.005G205500.1 | 5.4716  | 12.122   | -1.1476 | Down | 1.38E-08 | 3.62E-08 |
| Unigene64944 | Potri.018G000700.1 | 2.3962  | 5.3093   | -1.1478 | Down | 9.53E-07 | 2.20E-06 |
| Unigene7026  | Potri.015G007400.1 | 5.0819  | 11.2601  | -1.1478 | Down | 9.53E-07 | 2.20E-06 |
| Unigene7655  | Potri.011G072100.1 | 2.9072  | 6.4415   | -1.1478 | Down | 9.53E-07 | 2.20E-06 |
| Unigene50758 | Potri.005G092300.1 | 2.3312  | 5.1653   | -1.1478 | Down | 9.53E-07 | 2.20E-06 |
| Unigene1833  | Potri.001G469800.4 | 3.4927  | 7.7388   | -1.1478 | Down | 9.53E-07 | 2.20E-06 |
| Unigene18376 | Potri.001G468700.1 | 14.1746 | 31.4082  | -1.1478 | Down | 2.47E-40 | 1.95E-39 |
| Unigene6385  | Potri.011G045100.2 | 17.5527 | 38.8958  | -1.1479 | Down | 3.53E-19 | 1.53E-18 |
| Unigene9923  | Potri.010G122300.2 | 19.4127 | 43.0164  | -1.1479 | Down | 1.76E-24 | 9.06E-24 |
| Unigene28298 | Potri.009G007900.2 | 21.6243 | 47.917   | -1.1479 | Down | 1.76E-24 | 9.06E-24 |
| Unigene12983 | Potri.003G212300.4 | 3.9122  | 8.6693   | -1.1479 | Down | 2.56E-10 | 7.42E-10 |
| Unigene2132  | Potri.003G009500.1 | 4.7988  | 10.6338  | -1.1479 | Down | 2.56E-10 | 7.42E-10 |
| Unigene13491 | Potri.009G056500.2 | 8.4181  | 18.6548  | -1.148  | Down | 7.41E-14 | 2.57E-13 |
| Unigene13856 | Potri.010G232800.2 | 9.2038  | 20.397   | -1.1481 | Down | 2.17E-24 | 1.12E-23 |
| Unigene53637 | Potri.006G020700.6 | 17.0281 | 37.7391  | -1.1481 | Down | 4.81E-12 | 1.53E-11 |
| Unigene16562 | Potri.002G108000.2 | 39.0529 | 86.5528  | -1.1482 | Down | 4.30E-26 | 2.32E-25 |
| Unigene13475 | Potri.008G099100.1 | 29.5545 | 65.5085  | -1.1483 | Down | 4.45E-78 | 7.09E-77 |
| Unigene34147 | Potri.012G098600.1 | 2.3886  | 5.2953   | -1.1485 | Down | 1.18E-06 | 2.71E-06 |
| Unigene44205 | Potri.005G021600.1 | 6.9602  | 15.43    | -1.1485 | Down | 3.42E-17 | 1.37E-16 |
| Unigene49220 | Potri.001G174000.1 | 25.3235 | 56.1411  | -1.1486 | Down | 2.58E-29 | 1.54E-28 |
| Unigene48154 | Potri.001G467100.1 | 8.1188  | 18.0009  | -1.1487 | Down | 2.12E-08 | 5.51E-08 |
| Unigene18222 | Potri.019G068300.1 | 5.7798  | 12.8158  | -1.1488 | Down | 3.92E-10 | 1.13E-09 |
| Unigene29665 | Potri.009G016000.2 | 6.7532  | 14.9743  | -1.1488 | Down | 3.92E-10 | 1.13E-09 |
| Unigene1883  | Potri.012G079000.1 | 38.0418 | 84.3689  | -1.1491 | Down | 4.51E-63 | 5.67E-62 |

|               |                    |         |          |         |      |           |          |
|---------------|--------------------|---------|----------|---------|------|-----------|----------|
| Unigene19290  | Potri.005G040800.1 | 25.5571 | 56.681   | -1.1491 | Down | 7.70E-24  | 3.89E-23 |
| Unigene19740  | Potri.008G185600.1 | 10.8815 | 24.1362  | -1.1493 | Down | 2.46E-20  | 1.11E-19 |
| Unigene39211  | Potri.008G146500.2 | 2.9311  | 6.5015   | -1.1493 | Down | 1.47E-06  | 3.34E-06 |
| Unigene114242 | Potri.008G118500.4 | 9.5352  | 21.1501  | -1.1493 | Down | 2.64E-08  | 6.79E-08 |
| Unigene37305  | Potri.005G181700.3 | 7.1246  | 15.8032  | -1.1493 | Down | 9.12E-12  | 2.86E-11 |
| Unigene81939  | Potri.002G084900.1 | 4.9154  | 10.903   | -1.1493 | Down | 8.65E-05  | 1.67E-04 |
| Unigene47007  | Potri.001G420200.1 | 4.3283  | 9.6006   | -1.1493 | Down | 3.33E-15  | 1.22E-14 |
| Unigene28257  | Potri.001G043400.1 | 23.6602 | 52.4807  | -1.1493 | Down | 3.72E-27  | 2.08E-26 |
| Unigene21113  | Potri.005G216900.1 | 15.1479 | 33.6047  | -1.1495 | Down | 3.04E-20  | 1.36E-19 |
| Unigene32388  | Potri.001G367400.3 | 11.7811 | 26.1344  | -1.1495 | Down | 9.13E-29  | 5.35E-28 |
| Unigene39157  | Potri.014G047200.3 | 30.2429 | 67.096   | -1.1496 | Down | 1.13E-28  | 6.58E-28 |
| Unigene198    | Potri.005G186600.1 | 13.6408 | 30.2646  | -1.1497 | Down | 6.43E-101 | 1.39E-99 |
| Unigene111019 | Potri.017G120800.1 | 13.7419 | 30.4914  | -1.1498 | Down | 6.02E-10  | 1.71E-09 |
| Unigene30144  | Potri.005G151500.1 | 11.9132 | 26.4336  | -1.1498 | Down | 6.02E-10  | 1.71E-09 |
| Unigene7945   | Potri.010G087700.3 | 16.6383 | 36.9212  | -1.1499 | Down | 3.34E-35  | 2.33E-34 |
| Unigene23531  | Potri.003G093800.1 | 45.1141 | 100.1093 | -1.1499 | Down | 2.34E-70  | 3.30E-69 |
| Unigene10069  | Potri.006G275300.2 | 14.4505 | 32.0683  | -1.15   | Down | 2.66E-13  | 8.98E-13 |
| Unigene1807   | Potri.011G070300.1 | 7.7225  | 17.139   | -1.1501 | Down | 1.40E-11  | 4.34E-11 |
| Unigene103793 | Potri.010G167400.1 | 1.7446  | 3.8719   | -1.1501 | Down | 1.83E-06  | 4.13E-06 |
| Unigene45896  | Potri.008G152500.4 | 1.8266  | 4.0539   | -1.1501 | Down | 1.83E-06  | 4.13E-06 |
| Unigene21156  | Potri.015G008100.2 | 8.4008  | 18.6445  | -1.1502 | Down | 1.83E-06  | 4.13E-06 |
| Unigene3427   | Potri.011G135300.2 | 14.327  | 31.8022  | -1.1504 | Down | 3.29E-13  | 1.11E-12 |
| Unigene46820  | Potri.006G266300.2 | 27.2981 | 60.5947  | -1.1504 | Down | 6.66E-25  | 3.48E-24 |
| Unigene28831  | Potri.004G224300.1 | 7.8955  | 17.526   | -1.1504 | Down | 3.29E-13  | 1.11E-12 |
| Unigene17984  | Potri.013G057600.3 | 2.4374  | 5.4111   | -1.1506 | Down | 1.08E-04  | 2.06E-04 |
| Unigene39165  | Potri.009G034900.5 | 14.1807 | 31.4815  | -1.1506 | Down | 3.62E-18  | 1.50E-17 |
| Unigene49732  | Potri.006G072100.1 | 3.6096  | 8.0135   | -1.1506 | Down | 1.08E-04  | 2.06E-04 |
| Unigene23873  | Potri.003G100700.1 | 2.5018  | 5.5541   | -1.1506 | Down | 1.08E-04  | 2.06E-04 |
| Unigene52838  | Potri.001G452100.1 | 3.7413  | 8.3058   | -1.1506 | Down | 1.08E-04  | 2.06E-04 |
| Unigene49137  | Potri.005G214400.6 | 8.2132  | 18.2349  | -1.1507 | Down | 8.74E-20  | 3.86E-19 |
| Unigene115062 | Potri.003G119700.7 | 23.9405 | 53.1528  | -1.1507 | Down | 8.74E-20  | 3.86E-19 |
| Unigene52790  | Potri.T177900.1    | 11.901  | 26.4253  | -1.1508 | Down | 9.24E-10  | 2.60E-09 |
| Unigene7267   | Potri.010G217900.2 | 7.5149  | 16.6862  | -1.1508 | Down | 9.24E-10  | 2.60E-09 |
| Unigene18833  | Potri.005G193500.1 | 7.0978  | 15.762   | -1.151  | Down | 2.14E-11  | 6.60E-11 |
| Unigene119228 | Potri.002G097200.2 | 2.8828  | 6.4017   | -1.151  | Down | 2.27E-06  | 5.08E-06 |
| Unigene6402   | Potri.003G161400.1 | 6.0764  | 13.4958  | -1.1512 | Down | 5.03E-08  | 1.27E-07 |
| Unigene22376  | Potri.003G077100.3 | 4.4732  | 9.9351   | -1.1512 | Down | 1.19E-14  | 4.28E-14 |
| Unigene111628 | Potri.001G285800.1 | 33.4902 | 74.3854  | -1.1513 | Down | 7.85E-23  | 3.83E-22 |
| Unigene14865  | Potri.014G155600.1 | 10.1346 | 22.5127  | -1.1514 | Down | 2.65E-11  | 8.13E-11 |

|              |                     |         |          |         |      |           |           |
|--------------|---------------------|---------|----------|---------|------|-----------|-----------|
| Unigene23459 | Potri.008G122200.6  | 18.1185 | 40.2455  | -1.1514 | Down | 3.38E-34  | 2.30E-33  |
| Unigene20061 | Potri.007G123800.5  | 16.8282 | 37.3816  | -1.1514 | Down | 2.65E-11  | 8.13E-11  |
| Unigene222   | Potri.005G045700.1  | 14.5812 | 32.3894  | -1.1514 | Down | 2.96E-55  | 3.22E-54  |
| Unigene14141 | Potri.017G077200.1  | 42.088  | 93.494   | -1.1515 | Down | 5.90E-52  | 6.00E-51  |
| Unigene51467 | Potri.013G095200.1  | 16.737  | 37.1799  | -1.1515 | Down | 9.69E-23  | 4.72E-22  |
| Unigene29019 | Potri.001G366300.2  | 13.5545 | 30.1123  | -1.1516 | Down | 3.46E-29  | 2.05E-28  |
| Unigene46063 | Potri.019G068400.1  | 4.8323  | 10.7377  | -1.1519 | Down | 1.35E-04  | 2.55E-04  |
| Unigene54829 | Potri.014G076100.1  | 2.392   | 5.3151   | -1.1519 | Down | 1.35E-04  | 2.55E-04  |
| Unigene38818 | Potri.013G043500.1  | 2.8151  | 6.2552   | -1.1519 | Down | 1.35E-04  | 2.55E-04  |
| Unigene45711 | Potri.010G184300.2  | 2.3042  | 5.1201   | -1.1519 | Down | 1.35E-04  | 2.55E-04  |
| Unigene38789 | Potri.009G029800.3  | 5.5879  | 12.4168  | -1.1519 | Down | 1.42E-09  | 3.95E-09  |
| Unigene31718 | Potri.008G189900.3  | 10.3251 | 22.9431  | -1.1519 | Down | 1.42E-09  | 3.95E-09  |
| Unigene52646 | Potri.002G160700.5  | 40.543  | 90.0891  | -1.1519 | Down | 7.22E-42  | 5.92E-41  |
| Unigene12435 | Potri.001G088000.1  | 5.7445  | 12.7647  | -1.1519 | Down | 4.35E-16  | 1.66E-15  |
| Unigene42786 | Potri.010G229700.1  | 27.2924 | 60.6483  | -1.152  | Down | 5.28E-125 | 1.49E-123 |
| Unigene1578  | Potri.001G090900.4  | 12.1786 | 27.0644  | -1.152  | Down | 3.93E-32  | 2.53E-31  |
| Unigene42852 | Potri.010G230300.2  | 11.0921 | 24.6529  | -1.1522 | Down | 1.36E-41  | 1.10E-40  |
| Unigene39237 | Potri.008G154600.4  | 7.8428  | 17.4313  | -1.1522 | Down | 2.25E-14  | 7.98E-14  |
| Unigene1880  | Potri.001G372000.1  | 29.5676 | 65.7155  | -1.1522 | Down | 3.36E-43  | 2.84E-42  |
| Unigene43169 | Potri.010G202800.1  | 7.7416  | 17.2079  | -1.1524 | Down | 1.68E-68  | 2.30E-67  |
| Unigene39084 | Potri.010G202700.1  | 4.5429  | 10.0978  | -1.1524 | Down | 4.06E-11  | 1.23E-10  |
| Unigene47837 | Potri.011G057800.4  | 46.6244 | 103.6422 | -1.1525 | Down | 2.06E-41  | 1.67E-40  |
| Unigene76302 | Potri.008G145600.1  | 57.5242 | 127.8783 | -1.1525 | Down | 1.37E-36  | 9.87E-36  |
| Unigene3697  | Potri.002G113600.2  | 11.9298 | 26.519   | -1.1525 | Down | 1.76E-09  | 4.86E-09  |
| Unigene50970 | Potri.018G149800.1  | 9.0033  | 20.0156  | -1.1526 | Down | 7.75E-08  | 1.93E-07  |
| Unigene41598 | Potri.013G055800.4  | 20.1932 | 44.8966  | -1.1527 | Down | 1.97E-17  | 7.95E-17  |
| Unigene43053 | Potri.007G117700.1  | 16.1708 | 35.953   | -1.1527 | Down | 2.38E-44  | 2.06E-43  |
| Unigene28270 | Potri.004G071100.1  | 43.6318 | 97.0052  | -1.1527 | Down | 2.77E-52  | 2.84E-51  |
| Unigene88606 | Potri.003G051900.4  | 94.248  | 209.5371 | -1.1527 | Down | 5.33E-87  | 9.61E-86  |
| Unigene66356 | Potri.T002400.1     | 5.9629  | 13.2584  | -1.1528 | Down | 3.52E-06  | 7.76E-06  |
| Unigene73349 | Potri.015G064600.1  | 41.5422 | 92.3688  | -1.1528 | Down | 2.52E-25  | 1.33E-24  |
| Unigene88122 | Potri.013G128300.10 | 39.2387 | 87.2523  | -1.1529 | Down | 2.57E-36  | 1.84E-35  |
| Unigene6929  | Potri.012G132500.3  | 13.0236 | 28.9603  | -1.1529 | Down | 3.45E-14  | 1.21E-13  |
| Unigene75121 | Potri.006G138500.1  | 13.2848 | 29.5425  | -1.153  | Down | 2.18E-09  | 6.00E-09  |
| Unigene52638 | Potri.005G177500.1  | 9.385   | 20.8704  | -1.153  | Down | 2.18E-09  | 6.00E-09  |
| Unigene50443 | Potri.004G123400.1  | 5.8187  | 12.9396  | -1.153  | Down | 2.43E-17  | 9.79E-17  |
| Unigene24813 | Potri.001G314900.1  | 4.8694  | 10.828   | -1.153  | Down | 7.62E-27  | 4.22E-26  |
| Unigene21558 | Potri.018G008500.1  | 7.4539  | 16.5772  | -1.1531 | Down | 9.40E-27  | 5.19E-26  |
| Unigene23581 | Potri.006G113000.2  | 8.3742  | 18.6234  | -1.1531 | Down | 1.28E-23  | 6.40E-23  |

|               |                    |          |          |         |      |           |           |
|---------------|--------------------|----------|----------|---------|------|-----------|-----------|
| Unigene66613  | Potri.014G148700.5 | 2.2109   | 4.9175   | -1.1533 | Down | 1.68E-04  | 3.15E-04  |
| Unigene49445  | Potri.011G135500.1 | 4.22     | 9.3863   | -1.1533 | Down | 1.68E-04  | 3.15E-04  |
| Unigene2884   | Potri.011G103900.2 | 4.4473   | 9.8917   | -1.1533 | Down | 4.26E-14  | 1.49E-13  |
| Unigene18922  | Potri.010G024600.1 | 2.0357   | 4.5279   | -1.1533 | Down | 1.68E-04  | 3.15E-04  |
| Unigene31141  | Potri.007G103700.7 | 3.0349   | 6.7503   | -1.1533 | Down | 1.68E-04  | 3.15E-04  |
| Unigene48410  | Potri.005G123100.2 | 1.7362   | 3.8616   | -1.1533 | Down | 1.68E-04  | 3.15E-04  |
| Unigene40457  | Potri.005G085200.1 | 9.2134   | 20.4929  | -1.1533 | Down | 9.61E-08  | 2.38E-07  |
| Unigene23881  | Potri.019G128800.1 | 16.2507  | 36.1478  | -1.1534 | Down | 1.95E-48  | 1.84E-47  |
| Unigene75642  | Potri.007G008500.5 | 176.9208 | 393.5254 | -1.1534 | Down | 1.34E-107 | 3.14E-106 |
| Unigene2091   | Potri.017G089600.1 | 7.8318   | 17.4217  | -1.1535 | Down | 1.26E-15  | 4.70E-15  |
| Unigene107564 | Potri.006G200200.3 | 20.0415  | 44.5836  | -1.1535 | Down | 1.80E-12  | 5.86E-12  |
| Unigene34850  | Potri.002G254300.1 | 7.4438   | 16.5614  | -1.1537 | Down | 2.00E-57  | 2.27E-56  |
| Unigene21249  | Potri.001G099600.2 | 15.279   | 33.9937  | -1.1537 | Down | 2.00E-57  | 2.27E-56  |
| Unigene27503  | Potri.019G104500.1 | 16.1106  | 35.846   | -1.1538 | Down | 7.71E-11  | 2.31E-10  |
| Unigene74319  | Potri.017G041100.2 | 23.9411  | 53.2688  | -1.1538 | Down | 1.55E-15  | 5.78E-15  |
| Unigene23349  | Potri.013G084100.2 | 3.0584   | 6.805    | -1.1538 | Down | 4.37E-06  | 9.54E-06  |
| Unigene32759  | Potri.006G039700.2 | 3.8072   | 8.471    | -1.1538 | Down | 1.55E-15  | 5.78E-15  |
| Unigene13495  | Potri.005G069600.5 | 18.8805  | 42.008   | -1.1538 | Down | 3.44E-51  | 3.44E-50  |
| Unigene45257  | Potri.004G137000.2 | 19.1554  | 42.6207  | -1.1538 | Down | 3.67E-34  | 2.49E-33  |
| Unigene41620  | Potri.012G078600.1 | 5.9746   | 13.2948  | -1.1539 | Down | 2.23E-12  | 7.21E-12  |
| Unigene52329  | Potri.011G137100.1 | 30.8357  | 68.6117  | -1.1539 | Down | 4.91E-31  | 3.07E-30  |
| Unigene48638  | Potri.003G054900.4 | 13.575   | 30.2072  | -1.1539 | Down | 2.23E-12  | 7.21E-12  |
| Unigene28712  | Potri.002G216900.1 | 13.4134  | 29.8471  | -1.1539 | Down | 6.60E-28  | 3.77E-27  |
| Unigene49811  | Potri.003G068100.4 | 2.9626   | 6.5929   | -1.154  | Down | 1.19E-07  | 2.94E-07  |
| Unigene33700  | Potri.001G048800.1 | 44.89    | 99.8915  | -1.154  | Down | 3.76E-57  | 4.24E-56  |
| Unigene12096  | Potri.010G152400.1 | 14.8279  | 33.0026  | -1.1543 | Down | 1.01E-27  | 5.72E-27  |
| Unigene15585  | Potri.007G054100.1 | 31.1433  | 69.3162  | -1.1543 | Down | 1.01E-27  | 5.72E-27  |
| Unigene25288  | Potri.006G003400.1 | 41.1581  | 91.61    | -1.1543 | Down | 9.23E-31  | 5.73E-30  |
| Unigene36466  | Potri.005G125700.2 | 17.6961  | 39.3861  | -1.1543 | Down | 1.69E-18  | 7.10E-18  |
| Unigene74423  | Potri.005G183600.1 | 20.9918  | 46.727   | -1.1544 | Down | 8.06E-14  | 2.79E-13  |
| Unigene90871  | Potri.008G186500.7 | 41.1516  | 91.6061  | -1.1545 | Down | 6.41E-46  | 5.74E-45  |
| Unigene17275  | Potri.010G255300.2 | 16.836   | 37.4795  | -1.1546 | Down | 6.22E-20  | 2.76E-19  |
| Unigene24080  | Potri.005G164600.1 | 21.8703  | 48.6927  | -1.1547 | Down | 2.21E-62  | 2.74E-61  |
| Unigene30765  | Potri.015G146700.1 | 2.8257   | 6.2916   | -1.1548 | Down | 2.10E-04  | 3.88E-04  |
| Unigene29634  | Potri.011G045500.1 | 17.6373  | 39.2703  | -1.1548 | Down | 5.73E-29  | 3.38E-28  |
| Unigene13716  | Potri.009G068100.3 | 2.8305   | 6.3022   | -1.1548 | Down | 5.44E-06  | 1.18E-05  |
| Unigene1802   | Potri.009G012900.2 | 21.2956  | 47.4158  | -1.1548 | Down | 4.87E-35  | 3.37E-34  |
| Unigene20124  | Potri.007G028300.1 | 38.9338  | 86.6882  | -1.1548 | Down | 1.29E-42  | 1.07E-41  |
| Unigene30165  | Potri.005G134200.1 | 2.3657   | 5.2674   | -1.1548 | Down | 2.10E-04  | 3.89E-04  |

|               |                    |          |          |         |      |           |           |
|---------------|--------------------|----------|----------|---------|------|-----------|-----------|
| Unigene845    | Potri.005G053000.3 | 4.782    | 10.6474  | -1.1548 | Down | 4.15E-09  | 1.12E-08  |
| Unigene38347  | Potri.005G032300.1 | 4.4055   | 9.809    | -1.1548 | Down | 5.44E-06  | 1.18E-05  |
| Unigene23250  | Potri.003G166000.1 | 4.5487   | 10.128   | -1.1548 | Down | 5.44E-06  | 1.18E-05  |
| Unigene39630  | Potri.002G051100.1 | 3.3008   | 7.3495   | -1.1548 | Down | 1.48E-07  | 3.63E-07  |
| Unigene18394  | Potri.002G098000.2 | 8.6131   | 19.1802  | -1.155  | Down | 7.74E-26  | 4.15E-25  |
| Unigene117311 | Potri.004G137100.2 | 15.6553  | 34.8649  | -1.1551 | Down | 1.07E-16  | 4.20E-16  |
| Unigene32362  | Potri.010G013200.1 | 19.7753  | 44.0447  | -1.1553 | Down | 3.10E-84  | 5.39E-83  |
| Unigene42404  | Potri.004G113400.1 | 6.2266   | 13.8681  | -1.1553 | Down | 4.23E-12  | 1.35E-11  |
| Unigene22784  | Potri.001G136800.1 | 42.4388  | 94.5266  | -1.1553 | Down | 1.24E-82  | 2.10E-81  |
| Unigene13915  | Potri.004G186500.1 | 16.9846  | 37.8331  | -1.1554 | Down | 3.97E-48  | 3.73E-47  |
| Unigene1220   | Potri.019G077700.3 | 11.3029  | 25.1796  | -1.1556 | Down | 4.58E-33  | 3.03E-32  |
| Unigene11966  | Potri.011G056300.2 | 3.4332   | 7.6484   | -1.1556 | Down | 1.84E-07  | 4.47E-07  |
| Unigene7332   | Potri.011G154000.5 | 7.151    | 15.932   | -1.1557 | Down | 2.11E-43  | 1.79E-42  |
| Unigene4783   | Potri.002G205300.1 | 30.9855  | 69.0329  | -1.1557 | Down | 1.64E-28  | 9.54E-28  |
| Unigene66507  | Potri.007G000300.1 | 8.9739   | 19.9939  | -1.1558 | Down | 1.64E-16  | 6.37E-16  |
| Unigene36231  | Potri.006G031000.1 | 6.6177   | 14.7454  | -1.1559 | Down | 6.77E-06  | 1.45E-05  |
| Unigene15899  | Potri.001G322300.1 | 66.9869  | 149.2593 | -1.1559 | Down | 4.85E-64  | 6.19E-63  |
| Unigene44706  | Potri.001G051700.1 | 4.4237   | 9.8567   | -1.1559 | Down | 6.77E-06  | 1.45E-05  |
| Unigene26193  | Potri.014G103900.1 | 37.2995  | 83.1181  | -1.156  | Down | 2.22E-25  | 1.17E-24  |
| Unigene61914  | Potri.001G316800.1 | 5.4346   | 12.1101  | -1.156  | Down | 6.01E-18  | 2.48E-17  |
| Unigene17108  | Potri.016G000400.3 | 5.2262   | 11.6468  | -1.1561 | Down | 6.37E-09  | 1.70E-08  |
| Unigene9379   | Potri.006G101800.2 | 30.2771  | 67.4715  | -1.1561 | Down | 2.50E-28  | 1.45E-27  |
| Unigene24602  | Potri.003G031900.1 | 57.2963  | 127.6997 | -1.1562 | Down | 1.02E-57  | 1.16E-56  |
| Unigene17171  | Potri.017G082900.3 | 15.9998  | 35.6603  | -1.1563 | Down | 7.42E-18  | 3.05E-17  |
| Unigene25177  | Potri.018G021800.1 | 8.7942   | 19.6025  | -1.1564 | Down | 2.28E-07  | 5.51E-07  |
| Unigene16565  | Potri.016G046800.1 | 25.3917  | 56.5989  | -1.1564 | Down | 2.50E-16  | 9.65E-16  |
| Unigene65977  | Potri.006G224600.2 | 3.6177   | 8.0639   | -1.1564 | Down | 2.63E-04  | 4.81E-04  |
| Unigene42045  | Potri.006G083500.1 | 7.3835   | 16.4581  | -1.1564 | Down | 2.28E-07  | 5.51E-07  |
| Unigene38249  | Potri.006G000800.6 | 34.514   | 76.9301  | -1.1564 | Down | 3.52E-53  | 3.67E-52  |
| Unigene16356  | Potri.002G220500.1 | 15.6013  | 34.7757  | -1.1564 | Down | 2.25E-10  | 6.54E-10  |
| Unigene24637  | Potri.001G072800.1 | 12.5778  | 28.0362  | -1.1564 | Down | 2.25E-10  | 6.54E-10  |
| Unigene38867  | Potri.013G062800.1 | 10.046   | 22.3966  | -1.1567 | Down | 3.74E-22  | 1.78E-21  |
| Unigene22583  | Potri.010G189500.1 | 6.169    | 13.754   | -1.1567 | Down | 1.39E-23  | 6.93E-23  |
| Unigene92015  | Potri.006G114800.2 | 103.8585 | 231.5561 | -1.1567 | Down | 1.48E-128 | 4.32E-127 |
| Unigene49213  | Potri.006G075000.1 | 26.4205  | 58.9024  | -1.1567 | Down | 5.70E-50  | 5.56E-49  |
| Unigene25534  | Potri.017G001200.2 | 66.7618  | 148.8573 | -1.1568 | Down | 2.30E-48  | 2.17E-47  |
| Unigene50636  | Potri.005G161800.2 | 2.2184   | 4.9467   | -1.1569 | Down | 8.42E-06  | 1.79E-05  |
| Unigene4282   | Potri.004G209700.3 | 15.1459  | 33.7718  | -1.1569 | Down | 4.61E-22  | 2.20E-21  |
| Unigene53450  | Potri.010G225100.1 | 5.7694   | 12.865   | -1.157  | Down | 8.42E-06  | 1.79E-05  |

|               |                    |          |          |         |      |           |           |
|---------------|--------------------|----------|----------|---------|------|-----------|-----------|
| Unigene30819  | Potri.002G161500.1 | 6.3773   | 14.2206  | -1.157  | Down | 2.78E-10  | 8.07E-10  |
| Unigene25739  | Potri.001G018100.1 | 4.1768   | 9.3138   | -1.157  | Down | 8.42E-06  | 1.79E-05  |
| Unigene21778  | Potri.001G276800.2 | 9.6805   | 21.5879  | -1.1571 | Down | 2.55E-58  | 2.94E-57  |
| Unigene107970 | Potri.006G267600.1 | 39.128   | 87.2649  | -1.1572 | Down | 2.11E-23  | 1.05E-22  |
| Unigene22996  | Potri.008G114200.1 | 30.9793  | 69.0962  | -1.1573 | Down | 4.63E-32  | 2.98E-31  |
| Unigene9393   | Potri.006G102900.1 | 15.8072  | 35.2554  | -1.1573 | Down | 3.57E-13  | 1.20E-12  |
| Unigene15497  | Potri.002G024100.1 | 12.1485  | 27.0969  | -1.1573 | Down | 1.30E-14  | 4.64E-14  |
| Unigene13583  | Potri.011G065000.2 | 6.378    | 14.2264  | -1.1574 | Down | 4.08E-29  | 2.42E-28  |
| Unigene3200   | Potri.010G149500.1 | 17.8318  | 39.774   | -1.1574 | Down | 6.52E-35  | 4.50E-34  |
| Unigene31082  | Potri.007G129900.1 | 12.496   | 27.8726  | -1.1574 | Down | 7.04E-22  | 3.33E-21  |
| Unigene40019  | Potri.003G161600.5 | 4.6057   | 10.2734  | -1.1574 | Down | 9.79E-09  | 2.60E-08  |
| Unigene6049   | Potri.002G038300.1 | 6.7045   | 14.955   | -1.1574 | Down | 4.72E-16  | 1.80E-15  |
| Unigene21663  | Potri.003G126700.2 | 6.2433   | 13.9268  | -1.1575 | Down | 1.73E-17  | 7.01E-17  |
| Unigene45795  | Potri.008G115700.1 | 9.7253   | 21.6951  | -1.1576 | Down | 3.45E-10  | 9.94E-10  |
| Unigene108095 | Potri.017G144700.1 | 30.7494  | 68.6089  | -1.1578 | Down | 7.87E-19  | 3.35E-18  |
| Unigene39686  | Potri.015G098800.1 | 4.4532   | 9.9357   | -1.1578 | Down | 5.84E-16  | 2.22E-15  |
| Unigene4928   | Potri.006G043700.1 | 14.346   | 32.0086  | -1.1578 | Down | 2.14E-17  | 8.62E-17  |
| Unigene40997  | Potri.011G056100.1 | 36.4355  | 81.3013  | -1.1579 | Down | 3.82E-53  | 3.98E-52  |
| Unigene86904  | Potri.001G377800.2 | 23.8572  | 53.2324  | -1.1579 | Down | 1.07E-21  | 5.06E-21  |
| Unigene28175  | Potri.017G088300.1 | 35.5083  | 79.2352  | -1.158  | Down | 5.68E-36  | 4.04E-35  |
| Unigene86385  | Potri.014G052900.1 | 151.3048 | 337.6358 | -1.158  | Down | 1.19E-125 | 3.40E-124 |
| Unigene16971  | Potri.018G059400.2 | 9.7152   | 21.6813  | -1.1581 | Down | 9.72E-19  | 4.13E-18  |
| Unigene91465  | Potri.015G076100.2 | 27.2234  | 60.7539  | -1.1581 | Down | 4.97E-33  | 3.28E-32  |
| Unigene99128  | Potri.010G165900.2 | 2.4009   | 5.358    | -1.1581 | Down | 3.28E-04  | 5.95E-04  |
| Unigene31443  | Potri.008G095600.1 | 3.413    | 7.6168   | -1.1581 | Down | 3.28E-04  | 5.95E-04  |
| Unigene63318  | Potri.007G082400.1 | 3.3909   | 7.5673   | -1.1581 | Down | 1.05E-05  | 2.21E-05  |
| Unigene50338  | Potri.007G057100.1 | 7.3965   | 16.5067  | -1.1581 | Down | 7.22E-16  | 2.73E-15  |
| Unigene36453  | Potri.006G061800.2 | 2.9337   | 6.547    | -1.1581 | Down | 3.28E-04  | 5.95E-04  |
| Unigene88312  | Potri.006G059700.1 | 52.0616  | 116.185  | -1.1581 | Down | 1.08E-48  | 1.02E-47  |
| Unigene93326  | Potri.005G218600.1 | 2.7875   | 6.2208   | -1.1581 | Down | 1.05E-05  | 2.21E-05  |
| Unigene23115  | Potri.005G046100.1 | 2.3038   | 5.1413   | -1.1581 | Down | 1.05E-05  | 2.21E-05  |
| Unigene80422  | Potri.004G229200.4 | 6.3169   | 14.0972  | -1.1581 | Down | 1.05E-05  | 2.21E-05  |
| Unigene41520  | Potri.003G196200.3 | 10.6934  | 23.8643  | -1.1581 | Down | 4.27E-10  | 1.22E-09  |
| Unigene48188  | Potri.002G069900.1 | 6.5003   | 14.5067  | -1.1581 | Down | 1.05E-05  | 2.21E-05  |
| Unigene8198   | Potri.001G293600.1 | 2.238    | 4.9944   | -1.1581 | Down | 1.05E-05  | 2.21E-05  |
| Unigene9435   | Potri.001G176900.1 | 3.4468   | 7.6922   | -1.1581 | Down | 3.28E-04  | 5.95E-04  |
| Unigene879    | Potri.010G052600.2 | 7.8285   | 17.4723  | -1.1583 | Down | 1.85E-85  | 3.28E-84  |
| Unigene12335  | Potri.003G155400.1 | 19.2678  | 43.0052  | -1.1583 | Down | 1.17E-28  | 6.83E-28  |
| Unigene42650  | Potri.015G111000.1 | 6.8606   | 15.3137  | -1.1584 | Down | 4.01E-37  | 2.94E-36  |

|               |                    |         |          |         |      |          |          |
|---------------|--------------------|---------|----------|---------|------|----------|----------|
| Unigene38842  | Potri.010G186500.1 | 29.6912 | 66.2756  | -1.1584 | Down | 2.84E-34 | 1.93E-33 |
| Unigene43746  | Potri.014G042200.2 | 16.0033 | 35.7239  | -1.1585 | Down | 5.09E-54 | 5.39E-53 |
| Unigene28415  | Potri.005G178400.1 | 16.3023 | 36.3915  | -1.1585 | Down | 2.45E-14 | 8.67E-14 |
| Unigene47410  | Potri.001G056000.1 | 16.9543 | 37.8472  | -1.1585 | Down | 2.45E-14 | 8.66E-14 |
| Unigene22202  | Potri.001G045500.2 | 8.1643  | 18.2242  | -1.1585 | Down | 3.27E-17 | 1.31E-16 |
| Unigene87793  | Potri.008G151200.1 | 24.1692 | 53.9558  | -1.1586 | Down | 7.50E-23 | 3.66E-22 |
| Unigene33107  | Potri.013G147600.1 | 29.2314 | 65.2592  | -1.1587 | Down | 1.16E-49 | 1.13E-48 |
| Unigene34536  | Potri.011G088100.2 | 5.6312  | 12.5716  | -1.1587 | Down | 2.02E-21 | 9.43E-21 |
| Unigene42449  | Potri.004G228400.3 | 5.1512  | 11.5006  | -1.1587 | Down | 5.29E-10 | 1.51E-09 |
| Unigene101685 | Potri.019G130300.1 | 2.1737  | 4.8534   | -1.1588 | Down | 1.51E-08 | 3.94E-08 |
| Unigene21846  | Potri.001G149900.2 | 14.0215 | 31.3066  | -1.1588 | Down | 2.83E-38 | 2.13E-37 |
| Unigene31452  | Potri.T058900.2    | 12.3337 | 27.5403  | -1.1589 | Down | 3.03E-14 | 1.07E-13 |
| Unigene251    | Potri.013G019200.2 | 14.4228 | 32.2059  | -1.159  | Down | 5.29E-62 | 6.51E-61 |
| Unigene28599  | Potri.019G077700.2 | 5.6037  | 12.5146  | -1.1592 | Down | 2.33E-11 | 7.16E-11 |
| Unigene41539  | Potri.006G138500.4 | 36.0237 | 80.4513  | -1.1592 | Down | 1.25E-50 | 1.24E-49 |
| Unigene77865  | Potri.002G067800.1 | 72.3579 | 161.6032 | -1.1592 | Down | 8.77E-48 | 8.19E-47 |
| Unigene117338 | Potri.009G047000.1 | 8.5674  | 19.1358  | -1.1593 | Down | 6.55E-10 | 1.86E-09 |
| Unigene33654  | Potri.009G029600.1 | 5.939   | 13.265   | -1.1593 | Down | 6.55E-10 | 1.86E-09 |
| Unigene109686 | Potri.006G140400.1 | 28.1895 | 62.963   | -1.1593 | Down | 2.26E-18 | 9.48E-18 |
| Unigene18508  | Potri.003G077100.1 | 20.5501 | 45.8987  | -1.1593 | Down | 4.09E-49 | 3.92E-48 |
| Unigene13934  | Potri.010G039900.2 | 3.2263  | 7.2062   | -1.1594 | Down | 1.30E-05 | 2.73E-05 |
| Unigene33062  | Potri.010G211000.1 | 28.1844 | 62.9588  | -1.1595 | Down | 4.14E-53 | 4.31E-52 |
| Unigene47155  | Potri.008G147100.3 | 11.1734 | 24.9609  | -1.1596 | Down | 1.69E-15 | 6.27E-15 |
| Unigene50427  | Potri.001G324400.1 | 2.9735  | 6.6426   | -1.1596 | Down | 1.87E-08 | 4.87E-08 |
| Unigene38641  | Potri.001G169900.1 | 7.8525  | 17.5421  | -1.1596 | Down | 1.87E-08 | 4.87E-08 |
| Unigene4243   | Potri.018G086100.1 | 29.7968 | 66.5712  | -1.1597 | Down | 1.97E-58 | 2.28E-57 |
| Unigene22930  | Potri.006G140600.1 | 53.017  | 118.4495 | -1.1597 | Down | 7.39E-71 | 1.05E-69 |
| Unigene25553  | Potri.005G168600.3 | 24.0893 | 53.8195  | -1.1597 | Down | 7.99E-24 | 4.03E-23 |
| Unigene91141  | Potri.002G140100.1 | 62.227  | 139.0191 | -1.1597 | Down | 6.00E-71 | 8.54E-70 |
| Unigene33518  | Potri.006G118900.1 | 5.7456  | 12.8369  | -1.1598 | Down | 4.63E-14 | 1.62E-13 |
| Unigene40103  | Potri.001G214700.4 | 10.0378 | 22.4275  | -1.1598 | Down | 1.27E-19 | 5.59E-19 |
| Unigene22801  | Potri.013G105200.1 | 25.3055 | 56.5431  | -1.1599 | Down | 5.72E-39 | 4.38E-38 |
| Unigene8262   | Potri.019G046500.1 | 4.873   | 10.8889  | -1.16   | Down | 8.11E-10 | 2.29E-09 |
| Unigene38935  | Potri.012G021900.2 | 2.1025  | 4.6981   | -1.16   | Down | 4.11E-04 | 7.34E-04 |
| Unigene9579   | Potri.004G211300.2 | 3.6489  | 8.1535   | -1.16   | Down | 4.11E-04 | 7.34E-04 |
| Unigene44503  | Potri.001G224900.3 | 6.1128  | 13.6593  | -1.16   | Down | 1.28E-12 | 4.19E-12 |
| Unigene47037  | Potri.009G099400.1 | 43.2859 | 96.7422  | -1.1602 | Down | 1.66E-30 | 1.02E-29 |
| Unigene48880  | Potri.004G001300.1 | 26.3932 | 58.9853  | -1.1602 | Down | 2.08E-26 | 1.14E-25 |
| Unigene14517  | Potri.014G022400.3 | 10.8452 | 24.2422  | -1.1605 | Down | 1.58E-12 | 5.16E-12 |

|               |                    |         |         |         |      |           |           |
|---------------|--------------------|---------|---------|---------|------|-----------|-----------|
| Unigene23038  | Potri.006G185700.1 | 11.3756 | 25.4284 | -1.1605 | Down | 1.16E-16  | 4.55E-16  |
| Unigene49350  | Potri.001G003700.1 | 6.3354  | 14.1629 | -1.1606 | Down | 1.01E-09  | 2.82E-09  |
| Unigene82966  | Potri.012G099600.1 | 18.7202 | 41.8533 | -1.1607 | Down | 3.19E-15  | 1.17E-14  |
| Unigene24399  | Potri.006G109900.3 | 11.1605 | 24.9519 | -1.1607 | Down | 6.74E-29  | 3.97E-28  |
| Unigene5520   | Potri.003G137900.1 | 18.5106 | 41.3848 | -1.1607 | Down | 3.19E-15  | 1.17E-14  |
| Unigene7835   | Potri.018G026000.1 | 6.9032  | 15.4343 | -1.1608 | Down | 1.10E-20  | 4.99E-20  |
| Unigene9699   | Potri.016G091900.3 | 13.1396 | 29.3778 | -1.1608 | Down | 4.42E-11  | 1.34E-10  |
| Unigene27025  | Potri.016G051400.1 | 16.4266 | 36.7256 | -1.1608 | Down | 3.19E-15  | 1.17E-14  |
| Unigene29574  | Potri.002G217500.2 | 5.2558  | 11.7511 | -1.1608 | Down | 4.42E-11  | 1.34E-10  |
| Unigene28780  | Potri.001G229800.1 | 3.7664  | 8.421   | -1.1608 | Down | 4.42E-11  | 1.34E-10  |
| Unigene43711  | Potri.015G024800.1 | 2.0486  | 4.5807  | -1.1609 | Down | 6.73E-07  | 1.57E-06  |
| Unigene42514  | Potri.005G087500.1 | 5.5844  | 12.4869 | -1.1609 | Down | 6.73E-07  | 1.57E-06  |
| Unigene27098  | Potri.014G168700.1 | 25.2024 | 56.3558 | -1.161  | Down | 1.05E-24  | 5.46E-24  |
| Unigene82924  | Potri.013G004400.1 | 7.4599  | 16.6807 | -1.161  | Down | 6.73E-07  | 1.57E-06  |
| Unigene21634  | Potri.007G047300.1 | 18.7384 | 41.9033 | -1.1611 | Down | 5.41E-45  | 4.74E-44  |
| Unigene32641  | Potri.004G175000.2 | 13.9928 | 31.2921 | -1.1611 | Down | 3.80E-34  | 2.58E-33  |
| Unigene23961  | Potri.003G005500.1 | 38.7091 | 86.5617 | -1.1611 | Down | 3.07E-38  | 2.31E-37  |
| Unigene6950   | Potri.008G041900.1 | 8.1786  | 18.2903 | -1.1612 | Down | 2.87E-08  | 7.38E-08  |
| Unigene50288  | Potri.015G033400.1 | 7.8841  | 17.6338 | -1.1613 | Down | 3.66E-19  | 1.58E-18  |
| Unigene36133  | Potri.013G010700.1 | 13.7695 | 30.7961 | -1.1613 | Down | 8.06E-18  | 3.31E-17  |
| Unigene8267   | Potri.002G108100.1 | 5.1069  | 11.4218 | -1.1613 | Down | 1.25E-09  | 3.47E-09  |
| Unigene47341  | Potri.015G130900.2 | 10.2257 | 22.873  | -1.1614 | Down | 2.43E-12  | 7.83E-12  |
| Unigene77257  | Potri.001G197200.2 | 29.8396 | 66.7424 | -1.1614 | Down | 1.67E-20  | 7.56E-20  |
| Unigene27560  | Potri.014G176000.1 | 22.8861 | 51.202  | -1.1617 | Down | 9.11E-26  | 4.88E-25  |
| Unigene42452  | Potri.013G098700.1 | 28.0905 | 62.8463 | -1.1617 | Down | 3.27E-107 | 7.62E-106 |
| Unigene43100  | Potri.012G038600.1 | 34.3741 | 76.9035 | -1.1617 | Down | 7.27E-50  | 7.07E-49  |
| Unigene44200  | Potri.T050800.1    | 4.3882  | 9.819   | -1.1619 | Down | 8.37E-07  | 1.94E-06  |
| Unigene8420   | Potri.019G042100.2 | 7.3555  | 16.4586 | -1.1619 | Down | 5.59E-19  | 2.40E-18  |
| Unigene106661 | Potri.018G055900.1 | 1.3621  | 3.0478  | -1.1619 | Down | 2.02E-05  | 4.15E-05  |
| Unigene100613 | Potri.006G252100.1 | 3.1083  | 6.9551  | -1.1619 | Down | 5.14E-04  | 9.10E-04  |
| Unigene43720  | Potri.005G061000.1 | 2.5354  | 5.6732  | -1.1619 | Down | 8.37E-07  | 1.94E-06  |
| Unigene4676   | Potri.005G027500.1 | 3.0885  | 6.9108  | -1.1619 | Down | 5.14E-04  | 9.10E-04  |
| Unigene21408  | Potri.002G146400.1 | 8.5633  | 19.1612 | -1.1619 | Down | 2.35E-44  | 2.03E-43  |
| Unigene4253   | Potri.001G169900.1 | 3.5394  | 7.9197  | -1.1619 | Down | 5.14E-04  | 9.10E-04  |
| Unigene24854  | Potri.018G097700.2 | 14.8871 | 33.3114 | -1.162  | Down | 6.77E-11  | 2.03E-10  |
| Unigene36036  | Potri.016G057100.2 | 7.0479  | 15.7704 | -1.162  | Down | 3.56E-08  | 9.11E-08  |
| Unigene50196  | Potri.015G056700.1 | 20.7651 | 46.4641 | -1.162  | Down | 5.15E-51  | 5.13E-50  |
| Unigene36096  | Potri.013G145400.2 | 11.3825 | 25.4695 | -1.162  | Down | 3.56E-08  | 9.11E-08  |
| Unigene14409  | Potri.008G183600.4 | 9.5077  | 21.2745 | -1.162  | Down | 8.37E-07  | 1.94E-06  |



|              |                    |         |         |         |      |          |          |
|--------------|--------------------|---------|---------|---------|------|----------|----------|
| Unigene35988 | Potri.008G144200.1 | 23.8194 | 53.2983 | -1.162  | Down | 2.55E-20 | 1.15E-19 |
| Unigene52848 | Potri.008G075700.1 | 2.7867  | 6.2356  | -1.162  | Down | 5.14E-04 | 9.10E-04 |
| Unigene17209 | Potri.007G126400.1 | 7.6967  | 17.2222 | -1.162  | Down | 1.54E-09 | 4.28E-09 |
| Unigene17022 | Potri.004G131500.2 | 5.3877  | 12.0556 | -1.162  | Down | 8.37E-07 | 1.94E-06 |
| Unigene17465 | Potri.004G034800.1 | 2.2872  | 5.1179  | -1.162  | Down | 5.14E-04 | 9.10E-04 |
| Unigene3082  | Potri.001G220600.1 | 31.4681 | 70.413  | -1.162  | Down | 2.49E-60 | 2.98E-59 |
| Unigene28969 | Potri.003G087000.1 | 10.6624 | 23.8612 | -1.1621 | Down | 6.27E-31 | 3.91E-30 |
| Unigene31957 | Potri.007G024600.1 | 5.4886  | 12.2846 | -1.1623 | Down | 2.05E-45 | 1.82E-44 |
| Unigene7521  | Potri.014G177500.2 | 17.7326 | 39.6911 | -1.1624 | Down | 2.03E-37 | 1.50E-36 |
| Unigene7512  | Potri.012G005000.1 | 6.9007  | 15.446  | -1.1624 | Down | 1.66E-13 | 5.66E-13 |
| Unigene63015 | Potri.003G100600.4 | 4.9112  | 10.9928 | -1.1624 | Down | 1.66E-13 | 5.66E-13 |
| Unigene34032 | Potri.001G455600.1 | 27.5656 | 61.7017 | -1.1624 | Down | 4.29E-69 | 5.94E-68 |
| Unigene13754 | Potri.001G250800.1 | 6.5756  | 14.7183 | -1.1624 | Down | 1.66E-13 | 5.66E-13 |
| Unigene43345 | Potri.010G001500.1 | 17.4694 | 39.1043 | -1.1625 | Down | 4.41E-32 | 2.84E-31 |
| Unigene11975 | Potri.011G089900.1 | 18.6015 | 41.6427 | -1.1626 | Down | 3.10E-41 | 2.51E-40 |
| Unigene32949 | Potri.003G033200.1 | 15.0984 | 33.801  | -1.1627 | Down | 6.67E-40 | 5.22E-39 |
| Unigene22381 | Potri.002G137100.1 | 7.2242  | 16.1734 | -1.1627 | Down | 4.15E-16 | 1.59E-15 |
| Unigene14985 | Potri.010G088000.1 | 11.2074 | 25.0922 | -1.1628 | Down | 4.42E-08 | 1.12E-07 |
| Unigene52104 | Potri.010G111800.2 | 12.1859 | 27.2848 | -1.1629 | Down | 2.05E-13 | 6.96E-13 |
| Unigene29319 | Potri.010G036500.1 | 17.1635 | 38.429  | -1.1629 | Down | 4.80E-20 | 2.14E-19 |
| Unigene51422 | Potri.013G005900.3 | 14.4112 | 32.2699 | -1.163  | Down | 2.32E-17 | 9.34E-17 |
| Unigene28219 | Potri.007G077900.1 | 2.9131  | 6.5232  | -1.163  | Down | 1.04E-06 | 2.39E-06 |
| Unigene53038 | Potri.001G253400.1 | 9.3249  | 20.8805 | -1.163  | Down | 1.04E-06 | 2.39E-06 |
| Unigene7296  | Potri.007G031100.1 | 16.3697 | 36.658  | -1.1631 | Down | 5.13E-16 | 1.95E-15 |
| Unigene42001 | Potri.012G111200.3 | 12.9674 | 29.0401 | -1.1632 | Down | 5.93E-20 | 2.63E-19 |
| Unigene4574  | Potri.010G235900.1 | 16.9973 | 38.0657 | -1.1632 | Down | 7.02E-24 | 3.55E-23 |
| Unigene41337 | Potri.017G042500.1 | 20.1784 | 45.1919 | -1.1633 | Down | 1.30E-18 | 5.50E-18 |
| Unigene11181 | Potri.009G124600.2 | 9.4029  | 21.0594 | -1.1633 | Down | 1.83E-26 | 1.00E-25 |
| Unigene859   | Potri.017G035700.1 | 2.8721  | 6.4329  | -1.1634 | Down | 2.37E-09 | 6.51E-09 |
| Unigene44762 | Potri.005G066300.1 | 2.8547  | 6.394   | -1.1634 | Down | 2.37E-09 | 6.51E-09 |
| Unigene88619 | Potri.002G152200.1 | 4.2059  | 9.4203  | -1.1634 | Down | 2.52E-05 | 5.13E-05 |
| Unigene27569 | Potri.002G137700.1 | 6.8805  | 15.4108 | -1.1634 | Down | 2.37E-09 | 6.51E-09 |
| Unigene12658 | Potri.002G070300.1 | 3.2962  | 7.3829  | -1.1634 | Down | 2.52E-05 | 5.13E-05 |
| Unigene47792 | Potri.002G027300.4 | 15.0785 | 33.7727 | -1.1634 | Down | 2.54E-13 | 8.58E-13 |
| Unigene13157 | Potri.018G143600.2 | 2.5182  | 5.641   | -1.1636 | Down | 5.69E-12 | 1.80E-11 |
| Unigene49386 | Potri.014G045000.3 | 6.4735  | 14.5021 | -1.1636 | Down | 5.48E-08 | 1.38E-07 |
| Unigene301   | Potri.012G143500.1 | 6.2029  | 13.8955 | -1.1636 | Down | 4.91E-25 | 2.57E-24 |
| Unigene8861  | Potri.006G146900.1 | 4.0169  | 8.9987  | -1.1636 | Down | 5.48E-08 | 1.38E-07 |
| Unigene27169 | Potri.001G325000.1 | 18.799  | 42.1141 | -1.1636 | Down | 1.41E-14 | 5.03E-14 |

|               |                    |         |          |         |      |          |          |
|---------------|--------------------|---------|----------|---------|------|----------|----------|
| Unigene49656  | Potri.004G163700.2 | 12.507  | 28.0223  | -1.1638 | Down | 3.14E-13 | 1.06E-12 |
| Unigene40739  | Potri.011G138100.1 | 33.0011 | 73.9468  | -1.164  | Down | 3.44E-26 | 1.87E-25 |
| Unigene35438  | Potri.017G069600.1 | 17.6775 | 39.6139  | -1.1641 | Down | 7.04E-12 | 2.22E-11 |
| Unigene105403 | Potri.016G118700.1 | 4.0193  | 9.007    | -1.1641 | Down | 4.38E-17 | 1.75E-16 |
| Unigene29381  | Potri.014G017500.3 | 4.6316  | 10.379   | -1.1641 | Down | 2.94E-09 | 8.01E-09 |
| Unigene38030  | Potri.005G158300.6 | 28.0682 | 62.8986  | -1.1641 | Down | 7.49E-25 | 3.90E-24 |
| Unigene36405  | Potri.004G090400.2 | 16.8016 | 37.651   | -1.1641 | Down | 7.04E-12 | 2.22E-11 |
| Unigene104974 | Potri.002G217000.1 | 2.3748  | 5.3216   | -1.1641 | Down | 2.94E-09 | 8.01E-09 |
| Unigene51486  | Potri.001G316400.3 | 12.8915 | 28.8889  | -1.1641 | Down | 2.94E-09 | 8.01E-09 |
| Unigene18386  | Potri.002G204700.1 | 9.2368  | 20.7003  | -1.1642 | Down | 1.11E-28 | 6.51E-28 |
| Unigene21266  | Potri.012G061400.1 | 9.3153  | 20.8773  | -1.1643 | Down | 9.16E-52 | 9.28E-51 |
| Unigene23155  | Potri.004G217800.1 | 19.654  | 44.0492  | -1.1643 | Down | 6.34E-30 | 3.84E-29 |
| Unigene53738  | Potri.013G048000.2 | 12.3386 | 27.656   | -1.1644 | Down | 1.59E-10 | 4.68E-10 |
| Unigene45522  | Potri.011G105600.1 | 3.2516  | 7.2881   | -1.1644 | Down | 1.59E-10 | 4.68E-10 |
| Unigene29553  | Potri.002G189800.2 | 4.5513  | 10.2013  | -1.1644 | Down | 1.59E-10 | 4.68E-10 |
| Unigene35828  | Potri.010G227700.1 | 15.8337 | 35.4912  | -1.1645 | Down | 5.41E-17 | 2.15E-16 |
| Unigene43318  | Potri.006G135500.1 | 9.7564  | 21.8714  | -1.1646 | Down | 1.70E-28 | 9.85E-28 |
| Unigene26115  | Potri.003G146000.4 | 12.4332 | 27.8726  | -1.1646 | Down | 8.71E-12 | 2.73E-11 |
| Unigene22293  | Potri.015G107000.2 | 8.8183  | 19.7692  | -1.1647 | Down | 6.48E-26 | 3.48E-25 |
| Unigene59594  | Potri.018G021700.1 | 3.1509  | 7.0645   | -1.1648 | Down | 3.14E-05 | 6.33E-05 |
| Unigene52372  | Potri.017G109000.1 | 3.6034  | 8.079    | -1.1648 | Down | 3.14E-05 | 6.33E-05 |
| Unigene38314  | Potri.011G080600.2 | 4.7754  | 10.7068  | -1.1648 | Down | 3.64E-09 | 9.88E-09 |
| Unigene22     | Potri.011G169300.1 | 3.8114  | 8.5459   | -1.1649 | Down | 7.99E-26 | 4.29E-25 |
| Unigene7949   | Potri.008G174800.2 | 6.0025  | 13.4587  | -1.1649 | Down | 1.19E-29 | 7.16E-29 |
| Unigene42925  | Potri.001G454200.1 | 7.53    | 16.8853  | -1.165  | Down | 3.35E-37 | 2.46E-36 |
| Unigene39687  | Potri.015G020400.1 | 4.1993  | 9.4168   | -1.1651 | Down | 1.74E-24 | 8.96E-24 |
| Unigene16188  | Potri.013G039900.1 | 21.1037 | 47.3234  | -1.1651 | Down | 2.11E-19 | 9.18E-19 |
| Unigene79711  | Potri.009G088400.1 | 52.5863 | 117.9205 | -1.1651 | Down | 3.35E-37 | 2.46E-36 |
| Unigene21646  | Potri.003G149600.1 | 10.3143 | 23.13    | -1.1651 | Down | 2.54E-71 | 3.65E-70 |
| Unigene50048  | Potri.003G067400.1 | 9.0359  | 20.2624  | -1.1651 | Down | 2.11E-19 | 9.18E-19 |
| Unigene8268   | Potri.008G111100.1 | 5.7534  | 12.9031  | -1.1652 | Down | 8.26E-17 | 3.25E-16 |
| Unigene5565   | Potri.003G082200.2 | 2.6997  | 6.0545   | -1.1652 | Down | 1.60E-06 | 3.64E-06 |
| Unigene53122  | Potri.002G217000.1 | 8.0514  | 18.0568  | -1.1652 | Down | 1.60E-06 | 3.64E-06 |
| Unigene16933  | Potri.001G193400.1 | 24.1815 | 54.233   | -1.1653 | Down | 2.73E-33 | 1.81E-32 |
| Unigene48065  | Potri.016G082900.1 | 9.1011  | 20.4141  | -1.1655 | Down | 8.43E-08 | 2.10E-07 |
| Unigene28858  | Potri.010G076600.4 | 22.2429 | 49.8936  | -1.1655 | Down | 5.50E-42 | 4.52E-41 |
| Unigene38340  | Potri.010G065600.2 | 13.807  | 30.9715  | -1.1655 | Down | 1.83E-15 | 6.80E-15 |
| Unigene13687  | Potri.001G186900.1 | 8.3172  | 18.656   | -1.1655 | Down | 3.39E-72 | 4.93E-71 |
| Unigene73943  | Potri.001G123800.1 | 21.3641 | 47.9204  | -1.1655 | Down | 3.29E-14 | 1.16E-13 |

|               |                    |         |          |         |      |          |          |
|---------------|--------------------|---------|----------|---------|------|----------|----------|
| Unigene51248  | Potri.001G050000.2 | 9.682   | 21.7171  | -1.1655 | Down | 8.43E-08 | 2.10E-07 |
| Unigene65888  | Potri.014G161300.4 | 63.1995 | 141.7781 | -1.1656 | Down | 2.98E-73 | 4.40E-72 |
| Unigene13497  | Potri.010G029000.1 | 5.5467  | 12.4424  | -1.1656 | Down | 4.68E-23 | 2.30E-22 |
| Unigene42710  | Potri.007G019500.5 | 3.1698  | 7.1108   | -1.1656 | Down | 4.51E-09 | 1.22E-08 |
| Unigene32428  | Potri.013G141100.1 | 11.7207 | 26.2949  | -1.1657 | Down | 3.22E-19 | 1.39E-18 |
| Unigene48175  | Potri.006G222800.3 | 27.9305 | 62.6584  | -1.1657 | Down | 5.72E-18 | 2.36E-17 |
| Unigene18406  | Potri.014G142600.1 | 18.631  | 41.8007  | -1.1658 | Down | 4.63E-53 | 4.81E-52 |
| Unigene21802  | Potri.011G026900.4 | 7.2821  | 16.3382  | -1.1658 | Down | 5.13E-33 | 3.39E-32 |
| Unigene49201  | Potri.006G076600.3 | 5.6798  | 12.7432  | -1.1658 | Down | 1.33E-11 | 4.15E-11 |
| Unigene110905 | Potri.003G072600.2 | 15.9386 | 35.7595  | -1.1658 | Down | 1.33E-11 | 4.15E-11 |
| Unigene26941  | Potri.002G140400.1 | 22.8417 | 51.2454  | -1.1658 | Down | 2.76E-29 | 1.64E-28 |
| Unigene43548  | Potri.010G028700.1 | 4.367   | 9.7981   | -1.1659 | Down | 7.34E-13 | 2.43E-12 |
| Unigene18280  | Potri.006G215000.1 | 5.6205  | 12.611   | -1.1659 | Down | 4.06E-14 | 1.43E-13 |
| Unigene7743   | Potri.001G178000.3 | 8.8582  | 19.8757  | -1.1659 | Down | 1.05E-26 | 5.81E-26 |
| Unigene11283  | Potri.010G014500.1 | 13.1592 | 29.5278  | -1.166  | Down | 1.12E-46 | 1.02E-45 |
| Unigene18604  | Potri.002G204900.1 | 5.6279  | 12.6284  | -1.166  | Down | 1.26E-16 | 4.93E-16 |
| Unigene48976  | Potri.010G244800.2 | 15.3001 | 34.333   | -1.1661 | Down | 3.97E-19 | 1.71E-18 |
| Unigene21793  | Potri.007G057600.3 | 29.1522 | 65.421   | -1.1661 | Down | 2.29E-25 | 1.21E-24 |
| Unigene33736  | Potri.005G224900.1 | 14.6203 | 32.809   | -1.1661 | Down | 7.13E-23 | 3.49E-22 |
| Unigene11284  | Potri.001G300300.1 | 27.2456 | 61.1453  | -1.1662 | Down | 2.01E-66 | 2.68E-65 |
| Unigene32851  | Potri.001G207700.1 | 8.4147  | 18.8847  | -1.1662 | Down | 8.35E-38 | 6.21E-37 |
| Unigene18536  | Potri.017G099200.1 | 5.9391  | 13.3304  | -1.1664 | Down | 2.79E-15 | 1.03E-14 |
| Unigene51939  | Potri.011G052500.1 | 7.6295  | 17.1244  | -1.1664 | Down | 5.59E-09 | 1.50E-08 |
| Unigene41483  | Potri.005G189400.1 | 2.3893  | 5.3628   | -1.1664 | Down | 3.91E-05 | 7.82E-05 |
| Unigene48308  | Potri.005G123100.2 | 31.4292 | 70.543   | -1.1664 | Down | 1.03E-37 | 7.65E-37 |
| Unigene29525  | Potri.005G079400.1 | 1.8496  | 4.1514   | -1.1664 | Down | 3.91E-05 | 7.82E-05 |
| Unigene63853  | Potri.005G038400.1 | 3.9378  | 8.8384   | -1.1664 | Down | 3.91E-05 | 7.82E-05 |
| Unigene51913  | Potri.002G148300.3 | 27.4839 | 61.6878  | -1.1664 | Down | 9.13E-28 | 5.20E-27 |
| Unigene30928  | Potri.001G317500.4 | 8.7764  | 19.6986  | -1.1664 | Down | 5.59E-09 | 1.50E-08 |
| Unigene94517  | Potri.001G249100.1 | 12.3353 | 27.6867  | -1.1664 | Down | 3.02E-10 | 8.74E-10 |
| Unigene59466  | Potri.001G178000.3 | 10.6254 | 23.8488  | -1.1664 | Down | 1.65E-11 | 5.11E-11 |
| Unigene17425  | Potri.014G041300.3 | 45.7257 | 102.6417 | -1.1665 | Down | 7.12E-86 | 1.27E-84 |
| Unigene13364  | Potri.015G014300.1 | 10.0844 | 22.6383  | -1.1666 | Down | 1.98E-26 | 1.08E-25 |
| Unigene15835  | Potri.005G231700.1 | 72.3759 | 162.4706 | -1.1666 | Down | 2.43E-62 | 3.00E-61 |
| Unigene28584  | Potri.006G129100.2 | 25.3503 | 56.909   | -1.1667 | Down | 3.49E-25 | 1.84E-24 |
| Unigene40073  | Potri.001G375500.2 | 23.0278 | 51.6985  | -1.1667 | Down | 2.74E-36 | 1.96E-35 |
| Unigene11949  | Potri.008G165100.5 | 11.0122 | 24.7235  | -1.1668 | Down | 1.08E-17 | 4.40E-17 |
| Unigene52057  | Potri.010G036700.1 | 25.1755 | 56.5305  | -1.167  | Down | 4.48E-41 | 3.61E-40 |
| Unigene83594  | Potri.006G188200.3 | 81.7562 | 183.5767 | -1.167  | Down | 3.23E-63 | 4.07E-62 |

|               |                    |         |          |         |      |           |           |
|---------------|--------------------|---------|----------|---------|------|-----------|-----------|
| Unigene3899   | Potri.017G017200.1 | 4.3975  | 9.8751   | -1.1671 | Down | 3.74E-10  | 1.08E-09  |
| Unigene53765  | Potri.014G128300.1 | 11.2577 | 25.2801  | -1.1671 | Down | 3.74E-10  | 1.08E-09  |
| Unigene89654  | Potri.011G031300.1 | 65.067  | 146.1179 | -1.1671 | Down | 9.43E-67  | 1.26E-65  |
| Unigene39850  | Potri.001G189800.6 | 7.2165  | 16.2052  | -1.1671 | Down | 3.74E-10  | 1.08E-09  |
| Unigene52294  | Potri.008G199100.4 | 8.3806  | 18.8209  | -1.1672 | Down | 6.92E-09  | 1.85E-08  |
| Unigene39637  | Potri.013G105000.1 | 3.0523  | 6.8555   | -1.1674 | Down | 1.30E-07  | 3.19E-07  |
| Unigene65191  | Potri.013G020400.2 | 5.3704  | 12.0626  | -1.1674 | Down | 9.25E-19  | 3.93E-18  |
| Unigene32749  | Potri.004G206100.1 | 3.3598  | 7.5462   | -1.1674 | Down | 1.30E-07  | 3.19E-07  |
| Unigene45167  | Potri.016G070700.1 | 10.2164 | 22.9481  | -1.1675 | Down | 1.16E-23  | 5.81E-23  |
| Unigene49836  | Potri.006G218000.1 | 3.2703  | 7.3457   | -1.1675 | Down | 1.39E-12  | 4.54E-12  |
| Unigene12621  | Potri.003G143700.5 | 8.792   | 19.7482  | -1.1675 | Down | 9.25E-19  | 3.93E-18  |
| Unigene50566  | Potri.018G069500.1 | 34.8129 | 78.2017  | -1.1676 | Down | 1.14E-62  | 1.41E-61  |
| Unigene6565   | Potri.003G157700.2 | 9.5797  | 21.5199  | -1.1676 | Down | 2.53E-11  | 7.76E-11  |
| Unigene44210  | Potri.003G132100.1 | 2.8645  | 6.4349   | -1.1676 | Down | 2.48E-06  | 5.52E-06  |
| Unigene799    | Potri.002G041800.1 | 1.5473  | 3.4759   | -1.1676 | Down | 2.48E-06  | 5.52E-06  |
| Unigene52090  | Potri.001G463200.4 | 6.1512  | 13.8181  | -1.1676 | Down | 2.48E-06  | 5.52E-06  |
| Unigene70534  | Potri.001G094100.4 | 37.2995 | 83.7862  | -1.1676 | Down | 2.05E-22  | 9.85E-22  |
| Unigene35118  | Potri.018G037200.2 | 33.5407 | 75.3516  | -1.1677 | Down | 7.25E-110 | 1.75E-108 |
| Unigene47476  | Potri.015G052200.2 | 51.8595 | 116.5018 | -1.1677 | Down | 1.37E-34  | 9.38E-34  |
| Unigene8441   | Potri.014G072600.1 | 3.9773  | 8.9359   | -1.1678 | Down | 4.64E-10  | 1.33E-09  |
| Unigene39547  | Potri.011G166800.1 | 11.757  | 26.4141  | -1.1678 | Down | 1.27E-57  | 1.44E-56  |
| Unigene32247  | Potri.010G104500.1 | 19.2426 | 43.231   | -1.1678 | Down | 1.71E-45  | 1.52E-44  |
| Unigene6877   | Potri.018G028200.1 | 15.1998 | 34.152   | -1.1679 | Down | 2.04E-17  | 8.22E-17  |
| Unigene38632  | Potri.009G117500.1 | 10.4154 | 23.4014  | -1.1679 | Down | 9.50E-14  | 3.28E-13  |
| Unigene421    | Potri.001G471800.4 | 7.2873  | 16.3737  | -1.1679 | Down | 2.04E-17  | 8.22E-17  |
| Unigene105885 | Potri.016G013400.2 | 3.897   | 8.7568   | -1.168  | Down | 4.87E-05  | 9.66E-05  |
| Unigene27893  | Potri.015G130000.2 | 3.1307  | 7.0348   | -1.168  | Down | 4.87E-05  | 9.65E-05  |
| Unigene11710  | Potri.014G190800.1 | 9.3702  | 21.0547  | -1.168  | Down | 2.76E-39  | 2.12E-38  |
| Unigene52666  | Potri.009G169700.2 | 4.0169  | 9.0262   | -1.168  | Down | 4.87E-05  | 9.65E-05  |
| Unigene55293  | Potri.006G255000.1 | 3.472   | 7.8019   | -1.1681 | Down | 4.87E-05  | 9.65E-05  |
| Unigene50766  | Potri.001G439100.1 | 3.1009  | 6.968    | -1.1681 | Down | 4.87E-05  | 9.65E-05  |
| Unigene33105  | Potri.014G109700.2 | 4.6818  | 10.5223  | -1.1683 | Down | 2.52E-17  | 1.01E-16  |
| Unigene43555  | Potri.013G079600.1 | 9.0021  | 20.2317  | -1.1683 | Down | 4.92E-27  | 2.74E-26  |
| Unigene11201  | Potri.010G056100.1 | 8.7186  | 19.595   | -1.1683 | Down | 2.52E-17  | 1.01E-16  |
| Unigene21537  | Potri.012G083100.1 | 3.0236  | 6.7958   | -1.1684 | Down | 1.18E-13  | 4.04E-13  |
| Unigene1946   | Potri.009G050200.1 | 2.3984  | 5.3907   | -1.1684 | Down | 1.61E-07  | 3.93E-07  |
| Unigene33060  | Potri.008G216600.1 | 3.2434  | 7.29     | -1.1684 | Down | 1.61E-07  | 3.93E-07  |
| Unigene23295  | Potri.001G111000.3 | 3.829   | 8.606    | -1.1684 | Down | 1.61E-07  | 3.93E-07  |
| Unigene48762  | Potri.019G061200.1 | 5.6314  | 12.6585  | -1.1685 | Down | 1.74E-18  | 7.33E-18  |

|              |                    |         |          |         |      |          |          |
|--------------|--------------------|---------|----------|---------|------|----------|----------|
| Unigene29318 | Potri.015G035300.1 | 7.6295  | 17.1497  | -1.1685 | Down | 5.74E-10 | 1.64E-09 |
| Unigene28053 | Potri.005G047600.3 | 6.401   | 14.3883  | -1.1685 | Down | 5.74E-10 | 1.64E-09 |
| Unigene85611 | Potri.006G272100.1 | 29.6089 | 66.5611  | -1.1686 | Down | 1.07E-25 | 5.71E-25 |
| Unigene7726  | Potri.002G054000.1 | 6.5393  | 14.7005  | -1.1687 | Down | 6.38E-39 | 4.88E-38 |
| Unigene1577  | Potri.007G028900.2 | 15.1374 | 34.0329  | -1.1688 | Down | 1.95E-36 | 1.40E-35 |
| Unigene49995 | Potri.002G252800.2 | 21.314  | 47.9193  | -1.1688 | Down | 1.20E-31 | 7.63E-31 |
| Unigene39731 | Potri.009G149500.1 | 3.7085  | 8.3381   | -1.1689 | Down | 1.06E-08 | 2.81E-08 |
| Unigene17418 | Potri.009G110200.1 | 2.7585  | 6.2022   | -1.1689 | Down | 3.08E-06 | 6.82E-06 |
| Unigene8686  | Potri.003G117400.1 | 10.213  | 22.963   | -1.1689 | Down | 1.06E-08 | 2.81E-08 |
| Unigene16113 | Potri.001G451300.1 | 28.1275 | 63.2423  | -1.1689 | Down | 8.43E-21 | 3.85E-20 |
| Unigene15544 | Potri.008G126600.2 | 51.3254 | 115.4079 | -1.169  | Down | 2.40E-36 | 1.72E-35 |
| Unigene32042 | Potri.001G089400.1 | 23.1234 | 51.9946  | -1.169  | Down | 8.73E-64 | 1.11E-62 |
| Unigene47277 | Potri.T048600.1    | 24.4896 | 55.0686  | -1.1691 | Down | 5.88E-22 | 2.79E-21 |
| Unigene34442 | Potri.004G090400.2 | 12.1133 | 27.2418  | -1.1692 | Down | 8.46E-40 | 6.60E-39 |
| Unigene13062 | Potri.012G110200.1 | 4.1277  | 9.2835   | -1.1693 | Down | 6.87E-16 | 2.60E-15 |
| Unigene18118 | Potri.006G010100.2 | 10.3504 | 23.2786  | -1.1693 | Down | 2.87E-24 | 1.47E-23 |
| Unigene47382 | Potri.009G119500.1 | 35.3485 | 79.5049  | -1.1694 | Down | 9.06E-34 | 6.09E-33 |
| Unigene39614 | Potri.013G026700.3 | 4.6624  | 10.4879  | -1.1696 | Down | 4.79E-11 | 1.45E-10 |
| Unigene16316 | Potri.008G052500.1 | 22.4156 | 50.4247  | -1.1696 | Down | 1.23E-14 | 4.42E-14 |
| Unigene50827 | Potri.011G161900.1 | 1.7301  | 3.8924   | -1.1698 | Down | 6.08E-05 | 1.19E-04 |
| Unigene50212 | Potri.010G169500.3 | 3.0364  | 6.8312   | -1.1698 | Down | 3.26E-12 | 1.04E-11 |
| Unigene20942 | Potri.009G123700.1 | 4.62    | 10.394   | -1.1698 | Down | 1.32E-08 | 3.46E-08 |
| Unigene10148 | Potri.009G018900.2 | 2.31    | 5.197    | -1.1698 | Down | 6.08E-05 | 1.19E-04 |
| Unigene16469 | Potri.004G210200.6 | 18.8578 | 42.426   | -1.1698 | Down | 8.49E-16 | 3.20E-15 |
| Unigene10947 | Potri.003G053800.3 | 3.7027  | 8.3304   | -1.1698 | Down | 1.32E-08 | 3.46E-08 |
| Unigene81354 | Potri.002G153600.2 | 4.9929  | 11.2329  | -1.1698 | Down | 6.08E-05 | 1.19E-04 |
| Unigene53005 | Potri.002G069100.1 | 8.91    | 20.0455  | -1.1698 | Down | 3.26E-12 | 1.04E-11 |
| Unigene46189 | Potri.008G210400.1 | 76.0468 | 171.1082 | -1.1699 | Down | 1.12E-94 | 2.24E-93 |
| Unigene390   | Potri.015G145700.2 | 4.3372  | 9.7607   | -1.1702 | Down | 3.83E-06 | 8.43E-06 |
| Unigene14804 | Potri.002G246000.1 | 13.0115 | 29.2822  | -1.1702 | Down | 1.05E-15 | 3.94E-15 |
| Unigene4216  | Potri.002G241800.4 | 22.5129 | 50.6621  | -1.1702 | Down | 2.82E-19 | 1.22E-18 |
| Unigene98389 | Potri.002G000500.1 | 2.7116  | 6.1024   | -1.1702 | Down | 3.83E-06 | 8.43E-06 |
| Unigene5487  | Potri.001G242200.1 | 18.6011 | 41.864   | -1.1703 | Down | 1.37E-21 | 6.41E-21 |
| Unigene26552 | Potri.001G110000.1 | 31.9895 | 71.9985  | -1.1704 | Down | 1.86E-27 | 1.05E-26 |
| Unigene3931  | Potri.012G011700.2 | 7.4599  | 16.7917  | -1.1705 | Down | 2.48E-07 | 5.98E-07 |
| Unigene1654  | Potri.009G113700.1 | 2.2484  | 5.061    | -1.1705 | Down | 2.48E-07 | 5.98E-07 |
| Unigene62937 | Potri.009G018500.1 | 3.3314  | 7.4987   | -1.1705 | Down | 2.48E-07 | 5.98E-07 |
| Unigene17213 | Potri.015G017500.1 | 35.6126 | 80.1685  | -1.1706 | Down | 2.27E-41 | 1.84E-40 |
| Unigene10970 | Potri.006G204600.1 | 3.685   | 8.2953   | -1.1706 | Down | 1.88E-14 | 6.71E-14 |

|               |                    |          |          |         |      |           |           |
|---------------|--------------------|----------|----------|---------|------|-----------|-----------|
| Unigene39387  | Potri.010G031000.2 | 14.7024  | 33.0973  | -1.1707 | Down | 1.61E-28  | 9.36E-28  |
| Unigene4339   | Potri.005G210500.1 | 14.7874  | 33.2895  | -1.1707 | Down | 1.30E-15  | 4.85E-15  |
| Unigene58049  | Potri.003G110100.5 | 3.2668   | 7.3542   | -1.1707 | Down | 1.63E-08  | 4.27E-08  |
| Unigene3654   | Potri.001G289200.1 | 11.6236  | 26.1671  | -1.1707 | Down | 1.63E-08  | 4.27E-08  |
| Unigene19439  | Potri.006G222200.1 | 10.8558  | 24.441   | -1.1708 | Down | 1.09E-09  | 3.06E-09  |
| Unigene49045  | Potri.002G135600.2 | 14.6199  | 32.9155  | -1.1708 | Down | 6.20E-18  | 2.55E-17  |
| Unigene111128 | Potri.006G180100.1 | 14.4333  | 32.4976  | -1.1709 | Down | 7.35E-11  | 2.20E-10  |
| Unigene67485  | Potri.001G360500.1 | 43.7011  | 98.394   | -1.1709 | Down | 3.63E-55  | 3.94E-54  |
| Unigene42531  | Potri.002G237900.1 | 9.7778   | 22.0158  | -1.171  | Down | 4.88E-40  | 3.83E-39  |
| Unigene39504  | Potri.004G094300.1 | 10.9578  | 24.6759  | -1.1711 | Down | 2.45E-28  | 1.42E-27  |
| Unigene21289  | Potri.001G026700.1 | 5.8603   | 13.1964  | -1.1711 | Down | 4.98E-26  | 2.69E-25  |
| Unigene77416  | Potri.010G211300.2 | 94.7828  | 213.4513 | -1.1712 | Down | 5.04E-63  | 6.32E-62  |
| Unigene38033  | Potri.013G133300.1 | 110.3694 | 248.5609 | -1.1713 | Down | 8.81E-175 | 3.85E-173 |
| Unigene17086  | Potri.008G105300.4 | 21.2267  | 47.8082  | -1.1714 | Down | 4.31E-27  | 2.40E-26  |
| Unigene38238  | Potri.018G029300.1 | 3.6203   | 8.1552   | -1.1716 | Down | 7.58E-05  | 1.47E-04  |
| Unigene6561   | Potri.014G047300.2 | 14.6534  | 33.0093  | -1.1716 | Down | 9.46E-18  | 3.87E-17  |
| Unigene107285 | Potri.013G059800.6 | 8.2059   | 18.4852  | -1.1716 | Down | 4.76E-06  | 1.03E-05  |
| Unigene22790  | Potri.011G164500.1 | 3.7232   | 8.3871   | -1.1716 | Down | 3.08E-07  | 7.37E-07  |
| Unigene15889  | Potri.011G156100.7 | 11.1392  | 25.093   | -1.1716 | Down | 2.03E-08  | 5.27E-08  |
| Unigene28483  | Potri.010G248000.1 | 2.7353   | 6.1617   | -1.1716 | Down | 7.58E-05  | 1.47E-04  |
| Unigene17838  | Potri.010G221000.4 | 4.3765   | 9.8588   | -1.1716 | Down | 4.76E-06  | 1.03E-05  |
| Unigene28660  | Potri.007G076300.1 | 2.9949   | 6.7464   | -1.1716 | Down | 3.08E-07  | 7.37E-07  |
| Unigene72787  | Potri.005G154000.1 | 92.7109  | 208.8472 | -1.1716 | Down | 9.06E-56  | 9.96E-55  |
| Unigene52972  | Potri.004G182800.4 | 8.6835   | 19.5611  | -1.1716 | Down | 9.09E-11  | 2.71E-10  |
| Unigene53071  | Potri.002G036800.4 | 9.6768   | 21.7986  | -1.1716 | Down | 3.08E-07  | 7.37E-07  |
| Unigene31850  | Potri.013G154900.1 | 12.7986  | 28.8324  | -1.1717 | Down | 2.75E-99  | 5.86E-98  |
| Unigene34970  | Potri.002G111700.1 | 3.3493   | 7.545    | -1.1717 | Down | 4.20E-13  | 1.41E-12  |
| Unigene94388  | Potri.017G148100.1 | 12.5733  | 28.3273  | -1.1718 | Down | 3.95E-36  | 2.82E-35  |
| Unigene94     | Potri.001G325400.1 | 8.403    | 18.9311  | -1.1718 | Down | 2.47E-45  | 2.18E-44  |
| Unigene45820  | Potri.010G026100.1 | 31.3316  | 70.592   | -1.1719 | Down | 4.61E-28  | 2.64E-27  |
| Unigene39836  | Potri.018G079500.2 | 3.8508   | 8.677    | -1.172  | Down | 1.17E-17  | 4.76E-17  |
| Unigene112880 | Potri.011G089200.2 | 23.1046  | 52.0618  | -1.172  | Down | 1.17E-17  | 4.76E-17  |
| Unigene45614  | Potri.009G035300.1 | 4.1629   | 9.38     | -1.172  | Down | 5.63E-20  | 2.50E-19  |
| Unigene12064  | Potri.006G254000.1 | 13.36    | 30.1024  | -1.172  | Down | 2.74E-22  | 1.31E-21  |
| Unigene31793  | Potri.002G255800.4 | 7.7505   | 17.4634  | -1.172  | Down | 6.94E-115 | 1.77E-113 |
| Unigene31294  | Potri.007G041000.1 | 7.5524   | 17.0206  | -1.1723 | Down | 7.63E-12  | 2.40E-11  |
| Unigene59877  | Potri.006G244400.6 | 7.9986   | 18.0262  | -1.1723 | Down | 7.63E-12  | 2.40E-11  |
| Unigene4362   | Potri.014G123800.2 | 18.2031  | 41.0274  | -1.1724 | Down | 1.00E-18  | 4.25E-18  |
| Unigene71154  | Potri.005G147400.3 | 32.1293  | 72.4129  | -1.1724 | Down | 6.95E-20  | 3.08E-19  |

|               |                    |         |          |         |      |          |          |
|---------------|--------------------|---------|----------|---------|------|----------|----------|
| Unigene29919  | Potri.T106100.1    | 24.0234 | 54.1479  | -1.1725 | Down | 1.43E-25 | 7.59E-25 |
| Unigene40263  | Potri.013G070700.4 | 3.0646  | 6.9075   | -1.1725 | Down | 1.67E-09 | 4.64E-09 |
| Unigene42124  | Potri.004G133800.1 | 12.8903 | 29.0555  | -1.1725 | Down | 2.09E-16 | 8.08E-16 |
| Unigene23762  | Potri.001G254300.1 | 7.9881  | 18.0052  | -1.1725 | Down | 2.28E-40 | 1.80E-39 |
| Unigene68068  | Potri.012G072200.1 | 7.5294  | 16.9726  | -1.1726 | Down | 3.03E-15 | 1.11E-14 |
| Unigene48653  | Potri.010G167000.1 | 52.5909 | 118.5541 | -1.1727 | Down | 2.81E-40 | 2.22E-39 |
| Unigene17126  | Potri.017G111800.6 | 6.5184  | 14.6956  | -1.1728 | Down | 3.82E-07 | 9.08E-07 |
| Unigene77046  | Potri.017G078900.1 | 8.7955  | 19.8294  | -1.1728 | Down | 3.82E-07 | 9.08E-07 |
| Unigene32850  | Potri.014G084600.1 | 2.1025  | 4.74     | -1.1728 | Down | 3.82E-07 | 9.08E-07 |
| Unigene23664  | Potri.007G058600.1 | 12.4172 | 27.9953  | -1.1728 | Down | 7.50E-29 | 4.41E-28 |
| Unigene39703  | Potri.006G144600.2 | 2.2631  | 5.1022   | -1.1728 | Down | 3.82E-07 | 9.08E-07 |
| Unigene12976  | Potri.005G092100.1 | 2.7667  | 6.2375   | -1.1728 | Down | 3.82E-07 | 9.08E-07 |
| Unigene22153  | Potri.004G153500.2 | 45.049  | 101.564  | -1.1728 | Down | 3.71E-57 | 4.18E-56 |
| Unigene108777 | Potri.004G136400.1 | 9.5913  | 21.6235  | -1.1728 | Down | 3.82E-07 | 9.08E-07 |
| Unigene107345 | Potri.018G009100.1 | 18.0903 | 40.788   | -1.1729 | Down | 9.44E-12 | 2.96E-11 |
| Unigene53894  | Potri.008G141400.4 | 21.6128 | 48.7293  | -1.1729 | Down | 1.07E-27 | 6.07E-27 |
| Unigene48594  | Potri.006G165100.2 | 18.1101 | 40.8313  | -1.1729 | Down | 1.78E-17 | 7.21E-17 |
| Unigene53784  | Potri.010G036500.1 | 23.7833 | 53.6269  | -1.173  | Down | 7.38E-21 | 3.38E-20 |
| Unigene47483  | Potri.018G058300.1 | 2.1414  | 4.8287   | -1.1731 | Down | 5.92E-06 | 1.28E-05 |
| Unigene7979   | Potri.011G094900.1 | 3.8462  | 8.6731   | -1.1731 | Down | 5.92E-06 | 1.28E-05 |
| Unigene83737  | Potri.006G008800.1 | 35.2426 | 79.484   | -1.1733 | Down | 1.14E-28 | 6.67E-28 |
| Unigene34572  | Potri.001G207900.1 | 6.9244  | 15.6165  | -1.1733 | Down | 2.07E-09 | 5.72E-09 |
| Unigene73364  | Potri.005G209900.2 | 18.9149 | 42.6611  | -1.1734 | Down | 7.95E-13 | 2.63E-12 |
| Unigene44930  | Potri.005G176400.4 | 12.6804 | 28.601   | -1.1735 | Down | 1.31E-19 | 5.75E-19 |
| Unigene51583  | Potri.017G154400.1 | 10.9503 | 24.701   | -1.1736 | Down | 3.12E-08 | 8.00E-08 |
| Unigene42457  | Potri.013G152800.1 | 18.4338 | 41.5816  | -1.1736 | Down | 7.03E-69 | 9.71E-68 |
| Unigene39119  | Potri.006G105300.1 | 3.0449  | 6.8684   | -1.1736 | Down | 9.45E-05 | 1.82E-04 |
| Unigene66166  | Potri.005G219300.1 | 2.4866  | 5.6092   | -1.1736 | Down | 9.45E-05 | 1.82E-04 |
| Unigene31180  | Potri.004G040500.1 | 13.9194 | 31.3984  | -1.1736 | Down | 4.62E-15 | 1.69E-14 |
| Unigene42355  | Potri.014G144100.1 | 28.6705 | 64.6762  | -1.1737 | Down | 3.71E-34 | 2.51E-33 |
| Unigene8888   | Potri.001G005900.5 | 38.0309 | 85.7985  | -1.1738 | Down | 7.24E-51 | 7.20E-50 |
| Unigene19343  | Potri.015G104200.3 | 5.461   | 12.322   | -1.174  | Down | 4.75E-07 | 1.12E-06 |
| Unigene16936  | Potri.008G045400.4 | 20.7003 | 46.7074  | -1.174  | Down | 5.84E-24 | 2.96E-23 |
| Unigene39140  | Potri.004G190400.1 | 7.0351  | 15.8739  | -1.174  | Down | 4.75E-07 | 1.12E-06 |
| Unigene18271  | Potri.004G091100.2 | 10.0519 | 22.6808  | -1.174  | Down | 2.33E-18 | 9.75E-18 |
| Unigene16029  | Potri.017G007400.1 | 75.9141 | 171.3023 | -1.1741 | Down | 2.00E-68 | 2.74E-67 |
| Unigene33920  | Potri.004G104900.2 | 15.1556 | 34.1982  | -1.1741 | Down | 1.39E-20 | 6.31E-20 |
| Unigene50779  | Potri.002G167100.1 | 9.6477  | 21.7704  | -1.1741 | Down | 5.71E-15 | 2.08E-14 |
| Unigene103876 | Potri.017G087500.2 | 4.6389  | 10.4684  | -1.1742 | Down | 2.57E-09 | 7.06E-09 |

|              |                    |         |          |         |      |          |          |
|--------------|--------------------|---------|----------|---------|------|----------|----------|
| Unigene587   | Potri.010G240200.1 | 4.5027  | 10.161   | -1.1742 | Down | 3.36E-17 | 1.34E-16 |
| Unigene30773 | Potri.006G220600.1 | 8.1662  | 18.4281  | -1.1742 | Down | 2.57E-09 | 7.06E-09 |
| Unigene26669 | Potri.003G071300.1 | 24.927  | 56.2593  | -1.1744 | Down | 4.87E-16 | 1.85E-15 |
| Unigene39188 | Potri.005G100400.1 | 22.8132 | 51.4911  | -1.1745 | Down | 1.03E-22 | 5.01E-22 |
| Unigene50170 | Potri.002G077700.1 | 4.0561  | 9.1553   | -1.1745 | Down | 3.24E-38 | 2.43E-37 |
| Unigene50368 | Potri.012G021700.1 | 5.6083  | 12.6598  | -1.1746 | Down | 3.86E-08 | 9.86E-08 |
| Unigene61496 | Potri.011G042300.1 | 4.2686  | 9.6357   | -1.1746 | Down | 7.37E-06 | 1.58E-05 |
| Unigene2265  | Potri.007G147100.1 | 4.4632  | 10.0749  | -1.1746 | Down | 7.37E-06 | 1.58E-05 |
| Unigene11791 | Potri.012G075100.1 | 12.8925 | 29.1051  | -1.1747 | Down | 7.51E-57 | 8.42E-56 |
| Unigene24236 | Potri.001G304900.1 | 10.6298 | 23.9973  | -1.1748 | Down | 1.21E-54 | 1.30E-53 |
| Unigene37528 | Potri.006G102000.3 | 10.8319 | 24.4561  | -1.1749 | Down | 1.03E-13 | 3.54E-13 |
| Unigene13778 | Potri.002G101500.3 | 5.3285  | 12.0302  | -1.1749 | Down | 6.01E-16 | 2.28E-15 |
| Unigene35268 | Potri.012G056000.1 | 13.6959 | 30.9238  | -1.175  | Down | 1.79E-11 | 5.53E-11 |
| Unigene38426 | Potri.010G225100.1 | 8.9672  | 20.2468  | -1.175  | Down | 1.79E-11 | 5.53E-11 |
| Unigene18291 | Potri.010G191100.1 | 6.3981  | 14.4461  | -1.175  | Down | 1.82E-21 | 8.52E-21 |
| Unigene89930 | Potri.001G048800.1 | 66.6932 | 150.5853 | -1.175  | Down | 5.84E-71 | 8.32E-70 |
| Unigene43408 | Potri.009G016900.4 | 8.134   | 18.3669  | -1.1751 | Down | 1.85E-32 | 1.20E-31 |
| Unigene91309 | Potri.008G025800.5 | 24.3571 | 55.0005  | -1.1751 | Down | 3.03E-30 | 1.85E-29 |
| Unigene26904 | Potri.003G146300.2 | 19.3462 | 43.6868  | -1.1751 | Down | 4.98E-28 | 2.85E-27 |
| Unigene43641 | Potri.015G148300.3 | 13.0207 | 29.4038  | -1.1752 | Down | 8.20E-26 | 4.40E-25 |
| Unigene63004 | Potri.010G005400.2 | 3.9664  | 8.9574   | -1.1752 | Down | 5.89E-07 | 1.38E-06 |
| Unigene218   | Potri.006G216900.1 | 13.5804 | 30.6686  | -1.1752 | Down | 5.02E-86 | 8.95E-85 |
| Unigene23498 | Potri.001G358400.4 | 12.1731 | 27.4907  | -1.1752 | Down | 4.39E-18 | 1.82E-17 |
| Unigene5845  | Potri.010G078500.2 | 16.507  | 37.2782  | -1.1753 | Down | 1.50E-12 | 4.91E-12 |
| Unigene51837 | Potri.001G280500.3 | 8.2185  | 18.5601  | -1.1753 | Down | 5.89E-07 | 1.38E-06 |
| Unigene92313 | Potri.005G105700.1 | 71.172  | 160.7408 | -1.1754 | Down | 1.03E-95 | 2.08E-94 |
| Unigene46629 | Potri.002G213600.1 | 19.5931 | 44.2506  | -1.1754 | Down | 7.43E-16 | 2.81E-15 |
| Unigene7716  | Potri.001G163100.1 | 6.4699  | 14.6128  | -1.1754 | Down | 3.76E-19 | 1.62E-18 |
| Unigene20522 | Potri.014G196400.2 | 19.1354 | 43.22    | -1.1755 | Down | 1.94E-22 | 9.34E-22 |
| Unigene71335 | Potri.010G206400.1 | 41.8931 | 94.6233  | -1.1755 | Down | 1.01E-25 | 5.41E-25 |
| Unigene51992 | Potri.009G120200.1 | 9.9582  | 22.4924  | -1.1755 | Down | 1.27E-13 | 4.36E-13 |
| Unigene38065 | Potri.007G139300.2 | 12.5063 | 28.2478  | -1.1755 | Down | 1.27E-13 | 4.36E-13 |
| Unigene27083 | Potri.004G174100.5 | 14.4631 | 32.6676  | -1.1755 | Down | 1.27E-13 | 4.36E-13 |
| Unigene49224 | Potri.018G123000.1 | 10.3425 | 23.3635  | -1.1757 | Down | 5.42E-18 | 2.24E-17 |
| Unigene33265 | Potri.016G003500.1 | 3.5039  | 7.9153   | -1.1757 | Down | 1.18E-04 | 2.24E-04 |
| Unigene6591  | Potri.015G123400.2 | 2.7271  | 6.1605   | -1.1757 | Down | 1.18E-04 | 2.24E-04 |
| Unigene33586 | Potri.014G045200.1 | 28.3175 | 63.9713  | -1.1757 | Down | 2.88E-45 | 2.54E-44 |
| Unigene31672 | Potri.010G036500.1 | 5.7101  | 12.899   | -1.1757 | Down | 4.79E-08 | 1.21E-07 |
| Unigene50404 | Potri.006G229900.2 | 4.1668  | 9.4128   | -1.1757 | Down | 4.79E-08 | 1.21E-07 |



|               |                    |         |         |         |      |          |          |
|---------------|--------------------|---------|---------|---------|------|----------|----------|
| Unigene48571  | Potri.006G204600.1 | 4.2511  | 9.6031  | -1.1757 | Down | 1.18E-04 | 2.24E-04 |
| Unigene51952  | Potri.004G004200.2 | 4.2825  | 9.6742  | -1.1757 | Down | 1.18E-04 | 2.24E-04 |
| Unigene118959 | Potri.002G257400.3 | 2.1694  | 4.9006  | -1.1757 | Down | 1.18E-04 | 2.24E-04 |
| Unigene28787  | Potri.008G188800.5 | 4.3657  | 9.8636  | -1.1759 | Down | 1.86E-12 | 6.04E-12 |
| Unigene65174  | Potri.006G264000.1 | 4.3087  | 9.7345  | -1.1759 | Down | 9.18E-16 | 3.46E-15 |
| Unigene45471  | Potri.014G058800.1 | 9.8372  | 22.227  | -1.176  | Down | 1.78E-24 | 9.19E-24 |
| Unigene34761  | Potri.005G162400.1 | 18.7511 | 42.3692 | -1.176  | Down | 3.43E-21 | 1.59E-20 |
| Unigene103107 | Potri.004G196500.3 | 6.7139  | 15.1699 | -1.176  | Down | 3.94E-09 | 1.07E-08 |
| Unigene28920  | Potri.013G065600.1 | 8.9464  | 20.2162 | -1.1761 | Down | 2.96E-22 | 1.41E-21 |
| Unigene12726  | Potri.005G038400.2 | 4.0623  | 9.1795  | -1.1761 | Down | 6.70E-18 | 2.76E-17 |
| Unigene66112  | Potri.016G097300.1 | 6.8887  | 15.5672 | -1.1762 | Down | 9.17E-06 | 1.94E-05 |
| Unigene8520   | Potri.002G175000.3 | 4.5787  | 10.3471 | -1.1762 | Down | 9.17E-06 | 1.94E-05 |
| Unigene40973  | Potri.001G252000.1 | 12.7973 | 28.9199 | -1.1762 | Down | 3.28E-10 | 9.46E-10 |
| Unigene84755  | Potri.009G162500.3 | 23.0965 | 52.1979 | -1.1763 | Down | 4.93E-20 | 2.20E-19 |
| Unigene12957  | Potri.016G043500.2 | 3.1134  | 7.0373  | -1.1765 | Down | 7.32E-07 | 1.70E-06 |
| Unigene14911  | Potri.008G135100.3 | 7.6705  | 17.338  | -1.1765 | Down | 7.32E-07 | 1.70E-06 |
| Unigene24965  | Potri.002G120600.1 | 6.6513  | 15.0343 | -1.1765 | Down | 7.32E-07 | 1.70E-06 |
| Unigene9345   | Potri.002G047200.1 | 16.1896 | 36.5942 | -1.1765 | Down | 2.30E-12 | 7.43E-12 |
| Unigene71782  | Potri.001G355600.1 | 18.6498 | 42.1551 | -1.1765 | Down | 2.30E-12 | 7.43E-12 |
| Unigene38431  | Potri.001G220100.1 | 4.0647  | 9.1876  | -1.1765 | Down | 7.32E-07 | 1.70E-06 |
| Unigene74029  | Potri.013G127900.1 | 8.8891  | 20.0926 | -1.1766 | Down | 7.32E-07 | 1.70E-06 |
| Unigene29265  | Potri.010G161500.1 | 11.4498 | 25.882  | -1.1766 | Down | 7.09E-19 | 3.03E-18 |
| Unigene24861  | Potri.005G229100.1 | 9.1897  | 20.7721 | -1.1766 | Down | 7.32E-07 | 1.70E-06 |
| Unigene53639  | Potri.005G179300.1 | 9.8925  | 22.3639 | -1.1768 | Down | 5.94E-08 | 1.50E-07 |
| Unigene52854  | Potri.008G159900.1 | 17.6072 | 39.8108 | -1.177  | Down | 1.02E-17 | 4.18E-17 |
| Unigene75728  | Potri.001G160700.5 | 40.8279 | 92.3174 | -1.177  | Down | 2.17E-27 | 1.22E-26 |
| Unigene13296  | Potri.012G055000.1 | 3.588   | 8.1135  | -1.1771 | Down | 3.39E-11 | 1.03E-10 |
| Unigene19334  | Potri.013G010900.2 | 15.8288 | 35.7952 | -1.1772 | Down | 2.85E-12 | 9.16E-12 |
| Unigene8428   | Potri.006G153100.3 | 8.6604  | 19.5845 | -1.1772 | Down | 2.85E-12 | 9.16E-12 |
| Unigene21216  | Potri.018G086300.1 | 6.7101  | 15.1756 | -1.1773 | Down | 3.07E-42 | 2.54E-41 |
| Unigene58825  | Potri.013G085700.5 | 9.7107  | 21.9633 | -1.1774 | Down | 1.26E-17 | 5.14E-17 |
| Unigene11360  | Potri.005G224000.3 | 11.7825 | 26.6499 | -1.1775 | Down | 7.53E-37 | 5.48E-36 |
| Unigene38931  | Potri.003G178600.3 | 14.6827 | 33.2093 | -1.1775 | Down | 1.08E-18 | 4.59E-18 |
| Unigene7228   | Potri.001G229800.1 | 6.2685  | 14.1781 | -1.1775 | Down | 1.08E-18 | 4.59E-18 |
| Unigene43218  | Potri.011G140100.5 | 11.8641 | 26.8373 | -1.1776 | Down | 2.15E-30 | 1.32E-29 |
| Unigene8105   | Potri.006G124100.3 | 16.6389 | 37.6365 | -1.1776 | Down | 5.11E-24 | 2.59E-23 |
| Unigene1373   | Potri.001G117700.3 | 16.3963 | 37.0876 | -1.1776 | Down | 5.11E-24 | 2.59E-23 |
| Unigene104229 | Potri.017G115500.2 | 1.7904  | 4.0507  | -1.1779 | Down | 1.47E-04 | 2.77E-04 |
| Unigene20882  | Potri.016G093200.2 | 3.8158  | 8.6331  | -1.1779 | Down | 1.14E-05 | 2.40E-05 |

|               |                    |         |          |         |      |          |          |
|---------------|--------------------|---------|----------|---------|------|----------|----------|
| Unigene42172  | Potri.012G022000.1 | 10.9347 | 24.7394  | -1.1779 | Down | 4.19E-11 | 1.27E-10 |
| Unigene36719  | Potri.009G165600.1 | 5.1805  | 11.7207  | -1.1779 | Down | 1.14E-05 | 2.40E-05 |
| Unigene43077  | Potri.009G165600.1 | 4.3589  | 9.8618   | -1.1779 | Down | 1.83E-16 | 7.09E-16 |
| Unigene79886  | Potri.007G004600.1 | 12.1794 | 27.5556  | -1.1779 | Down | 5.02E-10 | 1.44E-09 |
| Unigene6098   | Potri.006G056500.8 | 35.3703 | 80.024   | -1.1779 | Down | 5.45E-25 | 2.85E-24 |
| Unigene15024  | Potri.005G214400.6 | 6.6017  | 14.9361  | -1.1779 | Down | 1.14E-05 | 2.40E-05 |
| Unigene2245   | Potri.005G171500.1 | 2.5075  | 5.6732   | -1.1779 | Down | 1.14E-05 | 2.40E-05 |
| Unigene12669  | Potri.004G204500.1 | 4.451   | 10.0703  | -1.1779 | Down | 9.09E-07 | 2.10E-06 |
| Unigene19654  | Potri.002G182600.2 | 9.8807  | 22.3547  | -1.1779 | Down | 5.02E-10 | 1.44E-09 |
| Unigene74971  | Potri.002G018400.1 | 61.5956 | 139.3579 | -1.1779 | Down | 7.57E-40 | 5.92E-39 |
| Unigene37934  | Potri.001G342000.2 | 9.142   | 20.6836  | -1.1779 | Down | 9.09E-07 | 2.10E-06 |
| Unigene10799  | Potri.008G133500.2 | 17.8486 | 40.3859  | -1.178  | Down | 1.84E-52 | 1.89E-51 |
| Unigene49906  | Potri.007G104000.1 | 22.9882 | 52.0222  | -1.1782 | Down | 5.82E-45 | 5.10E-44 |
| Unigene6601   | Potri.018G079800.6 | 15.5621 | 35.2175  | -1.1783 | Down | 1.05E-21 | 4.93E-21 |
| Unigene118828 | Potri.014G123200.1 | 25.265  | 57.1773  | -1.1783 | Down | 1.52E-37 | 1.12E-36 |
| Unigene45351  | Potri.011G021100.1 | 17.8342 | 40.3609  | -1.1783 | Down | 1.74E-36 | 1.26E-35 |
| Unigene18811  | Potri.005G026900.2 | 8.9208  | 20.1894  | -1.1784 | Down | 1.93E-17 | 7.78E-17 |
| Unigene8990   | Potri.018G103100.1 | 59.9608 | 135.7198 | -1.1785 | Down | 6.75E-47 | 6.18E-46 |
| Unigene24962  | Potri.006G203200.1 | 59.2085 | 134.0157 | -1.1785 | Down | 2.15E-36 | 1.55E-35 |
| Unigene22298  | Potri.005G215400.1 | 3.768   | 8.5286   | -1.1785 | Down | 3.68E-13 | 1.23E-12 |
| Unigene46464  | Potri.016G075200.2 | 11.1773 | 25.3018  | -1.1787 | Down | 5.19E-11 | 1.57E-10 |
| Unigene4973   | Potri.016G068800.1 | 2.3397  | 5.2971   | -1.1789 | Down | 7.50E-09 | 2.00E-08 |
| Unigene20098  | Potri.013G031700.1 | 55.7096 | 126.134  | -1.179  | Down | 2.27E-63 | 2.87E-62 |
| Unigene25132  | Potri.005G139000.1 | 14.1069 | 31.9421  | -1.1791 | Down | 3.85E-14 | 1.35E-13 |
| Unigene11109  | Potri.019G092800.1 | 9.4388  | 21.3739  | -1.1792 | Down | 2.50E-41 | 2.02E-40 |
| Unigene110880 | Potri.010G199000.1 | 17.746  | 40.1852  | -1.1792 | Down | 4.55E-13 | 1.52E-12 |
| Unigene45269  | Potri.001G357300.1 | 4.8079  | 10.8876  | -1.1792 | Down | 2.52E-18 | 1.05E-17 |
| Unigene91391  | Potri.009G106900.3 | 13.086  | 29.6354  | -1.1793 | Down | 2.94E-17 | 1.18E-16 |
| Unigene28128  | Potri.008G123700.1 | 2.7776  | 6.2904   | -1.1793 | Down | 1.13E-06 | 2.58E-06 |
| Unigene45507  | Potri.008G053900.4 | 2.8828  | 6.5285   | -1.1793 | Down | 1.13E-06 | 2.58E-06 |
| Unigene50491  | Potri.006G119600.2 | 4.3724  | 9.9021   | -1.1793 | Down | 1.13E-06 | 2.58E-06 |
| Unigene23419  | Potri.001G338700.4 | 3.6554  | 8.2782   | -1.1793 | Down | 1.13E-06 | 2.58E-06 |
| Unigene18284  | Potri.019G116000.1 | 4.2136  | 9.5433   | -1.1794 | Down | 6.42E-11 | 1.93E-10 |
| Unigene429    | Potri.011G078300.1 | 7.6858  | 17.4074  | -1.1794 | Down | 5.72E-35 | 3.95E-34 |
| Unigene39308  | Potri.010G044900.2 | 5.8398  | 13.2259  | -1.1794 | Down | 1.97E-21 | 9.19E-21 |
| Unigene41682  | Potri.019G055100.1 | 28.7987 | 65.2309  | -1.1796 | Down | 5.34E-37 | 3.90E-36 |
| Unigene1906   | Potri.001G013800.1 | 16.3395 | 37.0108  | -1.1796 | Down | 1.25E-27 | 7.06E-27 |
| Unigene63049  | Potri.018G063700.4 | 5.4077  | 12.2498  | -1.1797 | Down | 1.42E-05 | 2.96E-05 |
| Unigene45110  | Potri.016G084700.4 | 12.8503 | 29.1097  | -1.1797 | Down | 4.09E-42 | 3.37E-41 |

|               |                     |         |          |         |      |           |           |
|---------------|---------------------|---------|----------|---------|------|-----------|-----------|
| Unigene48379  | Potri.013G012100.1  | 6.3523  | 14.3895  | -1.1797 | Down | 1.42E-05  | 2.96E-05  |
| Unigene8026   | Potri.009G042600.1  | 15.6138 | 35.3687  | -1.1797 | Down | 1.44E-26  | 7.90E-26  |
| Unigene34775  | Potri.004G132600.1  | 1.653   | 3.7445   | -1.1797 | Down | 1.42E-05  | 2.96E-05  |
| Unigene103554 | Potri.001G253400.1  | 2.9748  | 6.7386   | -1.1797 | Down | 4.76E-14  | 1.66E-13  |
| Unigene30039  | Potri.016G030900.1  | 21.5065 | 48.7217  | -1.1798 | Down | 3.84E-44  | 3.30E-43  |
| Unigene47624  | Potri.017G149900.1  | 10.1862 | 23.0783  | -1.1799 | Down | 9.30E-09  | 2.47E-08  |
| Unigene9657   | Potri.016G059000.1  | 4.3431  | 9.8399   | -1.1799 | Down | 9.30E-09  | 2.47E-08  |
| Unigene11596  | Potri.009G046300.1  | 28.1256 | 63.7241  | -1.18   | Down | 2.79E-51  | 2.80E-50  |
| Unigene40324  | Potri.007G079500.1  | 29.9699 | 67.9112  | -1.1801 | Down | 3.00E-21  | 1.39E-20  |
| Unigene16527  | Potri.015G033200.2  | 3.891   | 8.8176   | -1.1802 | Down | 1.84E-04  | 3.43E-04  |
| Unigene37133  | Potri.002G128700.8  | 30.9136 | 70.0505  | -1.1802 | Down | 2.38E-24  | 1.22E-23  |
| Unigene43899  | Potri.001G454200.1  | 1.8944  | 4.293    | -1.1802 | Down | 1.84E-04  | 3.43E-04  |
| Unigene88443  | Potri.017G059400.1  | 72.4709 | 164.2404 | -1.1803 | Down | 1.48E-70  | 2.10E-69  |
| Unigene26143  | Potri.007G071600.1  | 19.3735 | 43.9038  | -1.1803 | Down | 3.49E-20  | 1.56E-19  |
| Unigene66798  | Potri.004G122100.2  | 2.0068  | 4.5479   | -1.1803 | Down | 1.84E-04  | 3.43E-04  |
| Unigene35667  | Potri.004G106200.1  | 5.3285  | 12.0754  | -1.1803 | Down | 1.84E-04  | 3.43E-04  |
| Unigene23055  | Potri.002G134400.1  | 2.1044  | 4.7691   | -1.1803 | Down | 1.84E-04  | 3.43E-04  |
| Unigene32100  | Potri.018G125500.1  | 19.2767 | 43.6885  | -1.1804 | Down | 3.58E-98  | 7.49E-97  |
| Unigene39426  | Potri.010G163000.3  | 33.1552 | 75.1498  | -1.1805 | Down | 4.40E-57  | 4.96E-56  |
| Unigene18114  | Potri.003G134300.1  | 12.754  | 28.9074  | -1.1805 | Down | 2.93E-24  | 1.50E-23  |
| Unigene20539  | Potri.006G250400.2  | 10.0422 | 22.7622  | -1.1806 | Down | 9.54E-10  | 2.68E-09  |
| Unigene38083  | Potri.013G113200.1  | 3.3033  | 7.4884   | -1.1807 | Down | 1.40E-06  | 3.19E-06  |
| Unigene62934  | Potri.012G044700.1  | 8.2506  | 18.7037  | -1.1808 | Down | 8.25E-12  | 2.59E-11  |
| Unigene32461  | Potri.006G247400.1  | 5.2527  | 11.9081  | -1.1808 | Down | 2.01E-34  | 1.37E-33  |
| Unigene72383  | Potri.005G131200.1  | 17.3823 | 39.4049  | -1.1808 | Down | 8.25E-12  | 2.59E-11  |
| Unigene95199  | Potri.004G090500.1  | 3.1576  | 7.1582   | -1.1808 | Down | 1.40E-06  | 3.19E-06  |
| Unigene12575  | Potri.008G079300.2  | 12.3428 | 27.9835  | -1.1809 | Down | 4.58E-21  | 2.11E-20  |
| Unigene81253  | Potri.004G058000.3  | 9.8777  | 22.3957  | -1.181  | Down | 1.15E-08  | 3.03E-08  |
| Unigene27619  | Potri.002G153200.1  | 5.4505  | 12.3579  | -1.181  | Down | 6.50E-16  | 2.46E-15  |
| Unigene7001   | Potri.001G443200.2  | 22.4819 | 50.9747  | -1.181  | Down | 3.86E-25  | 2.03E-24  |
| Unigene300    | Potri.018G101200.2  | 10.2787 | 23.3084  | -1.1812 | Down | 4.12E-26  | 2.23E-25  |
| Unigene48811  | Potri.008G183800.3  | 11.6909 | 26.5102  | -1.1812 | Down | 8.60E-13  | 2.84E-12  |
| Unigene10516  | Potri.004G133300.1  | 24.1288 | 54.7154  | -1.1812 | Down | 4.12E-26  | 2.23E-25  |
| Unigene20977  | Potri.001G130900.1  | 13.7653 | 31.2153  | -1.1812 | Down | 7.63E-15  | 2.76E-14  |
| Unigene42507  | Potri.001G346000.1  | 11.9329 | 27.0619  | -1.1813 | Down | 3.33E-104 | 7.49E-103 |
| Unigene22024  | Potri.001G345300.13 | 7.3523  | 16.6733  | -1.1813 | Down | 2.23E-112 | 5.52E-111 |
| Unigene79674  | Potri.001G058200.1  | 21.9499 | 49.7767  | -1.1813 | Down | 6.85E-17  | 2.71E-16  |
| Unigene5029   | Potri.003G087600.2  | 52.6019 | 119.2963 | -1.1814 | Down | 1.64E-54  | 1.75E-53  |
| Unigene88314  | Potri.016G043600.1  | 4.2821  | 9.7124   | -1.1815 | Down | 1.77E-05  | 3.64E-05  |

|               |                    |         |          |         |      |          |          |
|---------------|--------------------|---------|----------|---------|------|----------|----------|
| Unigene105300 | Potri.014G140500.5 | 3.3481  | 7.5941   | -1.1815 | Down | 1.41E-07 | 3.45E-07 |
| Unigene23065  | Potri.014G054200.2 | 2.1784  | 4.9408   | -1.1815 | Down | 1.41E-07 | 3.45E-07 |
| Unigene24031  | Potri.012G129100.1 | 3.4017  | 7.7156   | -1.1815 | Down | 1.41E-07 | 3.45E-07 |
| Unigene12429  | Potri.009G052600.1 | 3.8516  | 8.7359   | -1.1815 | Down | 1.41E-07 | 3.45E-07 |
| Unigene44909  | Potri.004G065900.2 | 9.8979  | 22.4498  | -1.1815 | Down | 1.02E-11 | 3.19E-11 |
| Unigene36640  | Potri.001G244400.1 | 26.9386 | 61.1003  | -1.1815 | Down | 4.70E-28 | 2.70E-27 |
| Unigene20261  | Potri.017G000100.1 | 15.7724 | 35.7763  | -1.1816 | Down | 3.32E-41 | 2.68E-40 |
| Unigene60309  | Potri.013G032900.1 | 10.8054 | 24.5141  | -1.1819 | Down | 6.80E-24 | 3.44E-23 |
| Unigene38819  | Potri.004G156000.2 | 6.1682  | 13.9945  | -1.1819 | Down | 1.22E-10 | 3.60E-10 |
| Unigene51568  | Potri.017G144500.4 | 77.3312 | 175.4583 | -1.182  | Down | 3.23E-71 | 4.63E-70 |
| Unigene40852  | Potri.006G185200.2 | 27.1688 | 61.6421  | -1.182  | Down | 6.69E-27 | 3.71E-26 |
| Unigene61752  | Potri.016G079200.3 | 4.2591  | 9.6639   | -1.1821 | Down | 1.43E-08 | 3.74E-08 |
| Unigene89509  | Potri.014G049300.1 | 76.7932 | 174.2485 | -1.1821 | Down | 3.49E-80 | 5.75E-79 |
| Unigene114126 | Potri.010G252800.5 | 18.5794 | 42.1566  | -1.1821 | Down | 9.92E-16 | 3.73E-15 |
| Unigene28110  | Potri.010G146900.1 | 14.5237 | 32.9542  | -1.1821 | Down | 9.92E-16 | 3.73E-15 |
| Unigene26894  | Potri.006G188200.3 | 20.9694 | 47.5825  | -1.1821 | Down | 1.11E-13 | 3.82E-13 |
| Unigene13400  | Potri.006G160200.1 | 4.7801  | 10.8461  | -1.1821 | Down | 1.43E-08 | 3.74E-08 |
| Unigene15054  | Potri.001G001300.4 | 22.2449 | 50.4736  | -1.1821 | Down | 7.88E-23 | 3.85E-22 |
| Unigene63905  | Potri.008G031200.1 | 9.193   | 20.8638  | -1.1824 | Down | 1.17E-14 | 4.19E-14 |
| Unigene42360  | Potri.T169600.1    | 5.6801  | 12.8919  | -1.1825 | Down | 1.10E-17 | 4.50E-17 |
| Unigene3050   | Potri.010G089700.2 | 50.1236 | 113.766  | -1.1825 | Down | 8.26E-75 | 1.25E-73 |
| Unigene45524  | Potri.003G119800.1 | 18.3641 | 41.6801  | -1.1825 | Down | 7.96E-50 | 7.74E-49 |
| Unigene87998  | Potri.013G047800.1 | 11.7848 | 26.749   | -1.1826 | Down | 1.31E-12 | 4.30E-12 |
| Unigene114115 | Potri.009G115800.3 | 22.3797 | 50.8002  | -1.1826 | Down | 1.17E-18 | 4.94E-18 |
| Unigene45442  | Potri.002G226600.2 | 4.3657  | 9.9093   | -1.1826 | Down | 1.31E-12 | 4.30E-12 |
| Unigene36830  | Potri.015G123400.3 | 7.278   | 16.5221  | -1.1828 | Down | 1.75E-07 | 4.25E-07 |
| Unigene68862  | Potri.015G005200.1 | 1.7121  | 3.8868   | -1.1828 | Down | 2.29E-04 | 4.23E-04 |
| Unigene33358  | Potri.012G071900.1 | 3.6013  | 8.1756   | -1.1828 | Down | 1.75E-07 | 4.25E-07 |
| Unigene8454   | Potri.010G201600.3 | 2.0805  | 4.723    | -1.1828 | Down | 2.29E-04 | 4.23E-04 |
| Unigene8229   | Potri.008G026800.1 | 7.2695  | 16.503   | -1.1828 | Down | 1.51E-10 | 4.43E-10 |
| Unigene45615  | Potri.007G092700.4 | 19.0203 | 43.1791  | -1.1828 | Down | 1.16E-34 | 7.94E-34 |
| Unigene6159   | Potri.007G009600.1 | 6.9318  | 15.7362  | -1.1828 | Down | 1.51E-10 | 4.43E-10 |
| Unigene6563   | Potri.004G046900.2 | 4.4728  | 10.1539  | -1.1828 | Down | 1.75E-07 | 4.25E-07 |
| Unigene106028 | Potri.002G148000.4 | 3.0717  | 6.9733   | -1.1828 | Down | 2.29E-04 | 4.23E-04 |
| Unigene89128  | Potri.012G064100.3 | 33.9769 | 77.1371  | -1.1829 | Down | 1.24E-35 | 8.75E-35 |
| Unigene39578  | Potri.001G337200.1 | 3.4954  | 7.9359   | -1.1829 | Down | 1.36E-17 | 5.54E-17 |
| Unigene82356  | Potri.001G344900.4 | 26.5813 | 60.3548  | -1.1831 | Down | 1.39E-21 | 6.54E-21 |
| Unigene699    | Potri.019G048200.4 | 2.1323  | 4.842    | -1.1832 | Down | 1.77E-08 | 4.62E-08 |
| Unigene19003  | Potri.018G089800.2 | 9.201   | 20.8933  | -1.1832 | Down | 1.51E-15 | 5.65E-15 |

|              |                    |         |         |         |      |          |          |
|--------------|--------------------|---------|---------|---------|------|----------|----------|
| Unigene12118 | Potri.008G104100.1 | 3.9041  | 8.8653  | -1.1832 | Down | 1.77E-08 | 4.62E-08 |
| Unigene94661 | Potri.005G217300.1 | 5.1916  | 11.7888 | -1.1832 | Down | 1.77E-08 | 4.62E-08 |
| Unigene25220 | Potri.004G136300.1 | 8.4476  | 19.1825 | -1.1832 | Down | 1.77E-08 | 4.62E-08 |
| Unigene21132 | Potri.001G450900.1 | 20.9911 | 47.6656 | -1.1832 | Down | 1.51E-15 | 5.65E-15 |
| Unigene9817  | Potri.016G140000.6 | 3.594   | 8.1626  | -1.1834 | Down | 2.20E-05 | 4.50E-05 |
| Unigene47035 | Potri.016G138700.1 | 5.0003  | 11.3567 | -1.1835 | Down | 2.20E-05 | 4.50E-05 |
| Unigene19369 | Potri.010G048500.2 | 7.2892  | 16.5552 | -1.1835 | Down | 1.70E-13 | 5.79E-13 |
| Unigene52260 | Potri.017G128100.1 | 12.9845 | 29.4929 | -1.1836 | Down | 1.78E-18 | 7.49E-18 |
| Unigene21989 | Potri.016G081900.2 | 12.3092 | 27.9593 | -1.1836 | Down | 2.93E-44 | 2.53E-43 |
| Unigene49441 | Potri.004G081800.5 | 10.8245 | 24.5865 | -1.1836 | Down | 1.78E-18 | 7.49E-18 |
| Unigene53781 | Potri.002G104700.2 | 25.3011 | 57.4677 | -1.1836 | Down | 1.83E-22 | 8.82E-22 |
| Unigene77372 | Potri.016G016700.1 | 26.804  | 60.8867 | -1.1837 | Down | 1.89E-19 | 8.23E-19 |
| Unigene47726 | Potri.012G074800.1 | 36.965  | 83.9745 | -1.1838 | Down | 2.21E-25 | 1.17E-24 |
| Unigene6495  | Potri.019G020900.6 | 4.8468  | 11.0112 | -1.1839 | Down | 2.16E-06 | 4.84E-06 |
| Unigene29886 | Potri.015G070100.1 | 18.6923 | 42.4737 | -1.1841 | Down | 2.73E-25 | 1.44E-24 |
| Unigene33771 | Potri.007G116300.1 | 5.6111  | 12.7492 | -1.1841 | Down | 2.20E-18 | 9.21E-18 |
| Unigene18913 | Potri.006G096100.1 | 2.914   | 6.6214  | -1.1841 | Down | 2.17E-07 | 5.24E-07 |
| Unigene55768 | Potri.005G177600.1 | 3.878   | 8.8119  | -1.1841 | Down | 2.17E-07 | 5.24E-07 |
| Unigene6784  | Potri.004G191700.1 | 18.1226 | 41.1792 | -1.1841 | Down | 3.31E-31 | 2.08E-30 |
| Unigene2517  | Potri.016G110800.2 | 6.6948  | 15.2134 | -1.1842 | Down | 2.20E-14 | 7.80E-14 |
| Unigene15231 | Potri.012G089700.1 | 39.597  | 89.9799 | -1.1842 | Down | 3.80E-33 | 2.51E-32 |
| Unigene88405 | Potri.011G082800.1 | 37.9716 | 86.2835 | -1.1842 | Down | 4.38E-38 | 3.28E-37 |
| Unigene759   | Potri.003G138300.1 | 14.0568 | 31.9428 | -1.1842 | Down | 1.11E-58 | 1.29E-57 |
| Unigene92922 | Potri.016G124700.2 | 4.6174  | 10.4932 | -1.1843 | Down | 2.19E-08 | 5.68E-08 |
| Unigene27889 | Potri.006G002100.1 | 6.1525  | 13.982  | -1.1843 | Down | 2.19E-08 | 5.68E-08 |
| Unigene35994 | Potri.019G018400.1 | 6.9639  | 15.8274 | -1.1845 | Down | 2.24E-09 | 6.18E-09 |
| Unigene14565 | Potri.009G075800.1 | 11.8386 | 26.9066 | -1.1845 | Down | 2.24E-09 | 6.18E-09 |
| Unigene18261 | Potri.004G234600.1 | 42.5041 | 96.608  | -1.1845 | Down | 8.35E-44 | 7.14E-43 |
| Unigene23658 | Potri.003G063300.2 | 5.6349  | 12.8076 | -1.1845 | Down | 2.72E-18 | 1.13E-17 |
| Unigene7976  | Potri.001G261700.1 | 9.7976  | 22.2685 | -1.1845 | Down | 3.60E-26 | 1.95E-25 |
| Unigene69434 | Potri.008G221100.1 | 2.8692  | 6.5216  | -1.1846 | Down | 2.31E-10 | 6.72E-10 |
| Unigene47993 | Potri.007G110100.1 | 13.5936 | 30.898  | -1.1846 | Down | 2.31E-10 | 6.72E-10 |
| Unigene12634 | Potri.019G064000.3 | 4.8979  | 11.1336 | -1.1847 | Down | 2.39E-11 | 7.35E-11 |
| Unigene43309 | Potri.001G169900.1 | 6.6026  | 15.0089 | -1.1847 | Down | 3.44E-22 | 1.64E-21 |
| Unigene50690 | Potri.009G073800.1 | 7.8036  | 17.7401 | -1.1848 | Down | 2.60E-13 | 8.78E-13 |
| Unigene18417 | Potri.014G058400.1 | 13.3815 | 30.4227 | -1.1849 | Down | 5.42E-29 | 3.20E-28 |
| Unigene42178 | Potri.007G092700.2 | 17.1928 | 39.0864 | -1.1849 | Down | 2.72E-14 | 9.60E-14 |
| Unigene45854 | Potri.006G273300.1 | 34.6635 | 78.8084 | -1.1849 | Down | 5.79E-30 | 3.51E-29 |
| Unigene42013 | Potri.011G028400.4 | 30.0864 | 68.4069 | -1.185  | Down | 8.79E-36 | 6.22E-35 |

|               |                    |         |          |         |      |          |          |
|---------------|--------------------|---------|----------|---------|------|----------|----------|
| Unigene10740  | Potri.019G067500.1 | 3.8316  | 8.7121   | -1.1851 | Down | 4.00E-21 | 1.85E-20 |
| Unigene19247  | Potri.013G123500.1 | 39.6589 | 90.1746  | -1.1851 | Down | 1.17E-39 | 9.10E-39 |
| Unigene40696  | Potri.012G038300.1 | 38.3609 | 87.2313  | -1.1852 | Down | 6.68E-29 | 3.93E-28 |
| Unigene33379  | Potri.005G168800.2 | 24.2335 | 55.1043  | -1.1852 | Down | 5.13E-25 | 2.69E-24 |
| Unigene753    | Potri.004G104400.1 | 8.1593  | 18.5559  | -1.1854 | Down | 6.41E-59 | 7.47E-58 |
| Unigene41778  | Potri.017G085500.1 | 24.8226 | 56.4574  | -1.1855 | Down | 5.24E-22 | 2.49E-21 |
| Unigene11103  | Potri.017G041100.2 | 9.2842  | 21.1162  | -1.1855 | Down | 1.66E-38 | 1.25E-37 |
| Unigene53893  | Potri.016G043500.1 | 3.1447  | 7.1524   | -1.1855 | Down | 2.74E-05 | 5.56E-05 |
| Unigene23812  | Potri.015G005000.1 | 7.2627  | 16.5184  | -1.1855 | Down | 2.86E-10 | 8.29E-10 |
| Unigene91166  | Potri.011G052800.2 | 4.9367  | 11.2282  | -1.1855 | Down | 2.69E-07 | 6.47E-07 |
| Unigene106654 | Potri.010G238000.1 | 2.2836  | 5.194    | -1.1855 | Down | 2.69E-06 | 5.97E-06 |
| Unigene47062  | Potri.010G051600.1 | 24.6835 | 56.1411  | -1.1855 | Down | 4.93E-21 | 2.27E-20 |
| Unigene59991  | Potri.008G174500.1 | 2.0345  | 4.6274   | -1.1855 | Down | 2.74E-05 | 5.56E-05 |
| Unigene49080  | Potri.006G109900.2 | 3.4823  | 7.9203   | -1.1855 | Down | 2.69E-06 | 5.97E-06 |
| Unigene3332   | Potri.006G056400.1 | 5.7323  | 13.0377  | -1.1855 | Down | 3.92E-17 | 1.56E-16 |
| Unigene106891 | Potri.005G251900.1 | 1.9183  | 4.363    | -1.1855 | Down | 2.69E-06 | 5.97E-06 |
| Unigene45443  | Potri.003G033100.1 | 8.2366  | 18.7337  | -1.1855 | Down | 3.44E-77 | 5.42E-76 |
| Unigene52333  | Potri.002G207200.1 | 4.4404  | 10.0995  | -1.1855 | Down | 2.69E-06 | 5.97E-06 |
| Unigene117218 | Potri.001G368500.2 | 7.6512  | 17.4021  | -1.1855 | Down | 2.78E-09 | 7.61E-09 |
| Unigene53027  | Potri.001G278800.2 | 8.3506  | 18.993   | -1.1855 | Down | 2.69E-06 | 5.97E-06 |
| Unigene13417  | Potri.001G118000.2 | 3.7359  | 8.497    | -1.1855 | Down | 2.72E-08 | 7.00E-08 |
| Unigene43497  | Potri.005G100500.1 | 11.0777 | 25.1988  | -1.1857 | Down | 3.16E-44 | 2.72E-43 |
| Unigene37564  | Potri.011G100600.1 | 40.505  | 92.1434  | -1.1858 | Down | 1.25E-31 | 7.92E-31 |
| Unigene72660  | Potri.002G158200.1 | 41.7827 | 95.0535  | -1.1858 | Down | 8.90E-27 | 4.92E-26 |
| Unigene32303  | Potri.001G303700.1 | 22.6183 | 51.4549  | -1.1858 | Down | 8.85E-55 | 9.52E-54 |
| Unigene2791   | Potri.010G014500.1 | 5.2787  | 12.0094  | -1.1859 | Down | 6.88E-23 | 3.37E-22 |
| Unigene46362  | Potri.006G136300.4 | 21.0483 | 47.8847  | -1.1859 | Down | 7.81E-25 | 4.07E-24 |
| Unigene39550  | Potri.017G042400.1 | 4.2201  | 9.6029   | -1.1862 | Down | 1.03E-25 | 5.50E-25 |
| Unigene79562  | Potri.016G114700.2 | 32.8482 | 74.7478  | -1.1862 | Down | 9.64E-25 | 5.01E-24 |
| Unigene41477  | Potri.013G055100.1 | 7.2964  | 16.6027  | -1.1862 | Down | 4.16E-14 | 1.46E-13 |
| Unigene2519   | Potri.005G111100.4 | 8.1637  | 18.5762  | -1.1862 | Down | 4.16E-14 | 1.46E-13 |
| Unigene72644  | Potri.008G147100.3 | 17.5738 | 39.992   | -1.1863 | Down | 3.80E-12 | 1.22E-11 |
| Unigene74281  | Potri.006G077400.1 | 17.0017 | 38.6899  | -1.1863 | Down | 3.80E-12 | 1.22E-11 |
| Unigene3632   | Potri.016G046900.1 | 50.6136 | 115.1903 | -1.1864 | Down | 2.20E-55 | 2.40E-54 |
| Unigene49956  | Potri.003G096800.3 | 21.5562 | 49.0573  | -1.1864 | Down | 1.77E-30 | 1.09E-29 |
| Unigene51681  | Potri.001G156800.1 | 3.3978  | 7.7327   | -1.1864 | Down | 3.66E-11 | 1.11E-10 |
| Unigene17926  | Potri.006G183000.2 | 17.868  | 40.6665  | -1.1865 | Down | 6.68E-19 | 2.86E-18 |
| Unigene83476  | Potri.006G199500.1 | 29.4252 | 66.9753  | -1.1866 | Down | 1.19E-24 | 6.16E-24 |
| Unigene1046   | Potri.001G105100.4 | 34.2717 | 78.0066  | -1.1866 | Down | 7.53E-86 | 1.34E-84 |

|               |                    |         |         |         |      |          |          |
|---------------|--------------------|---------|---------|---------|------|----------|----------|
| Unigene19504  | Potri.016G118000.1 | 10.0986 | 22.988  | -1.1867 | Down | 3.37E-08 | 8.64E-08 |
| Unigene43316  | Potri.004G043200.5 | 14.4235 | 32.8332 | -1.1867 | Down | 9.86E-22 | 4.65E-21 |
| Unigene9641   | Potri.002G214400.2 | 9.7577  | 22.2121 | -1.1867 | Down | 5.39E-15 | 1.97E-14 |
| Unigene34940  | Potri.014G073800.3 | 12.3972 | 28.2226 | -1.1868 | Down | 5.14E-14 | 1.79E-13 |
| Unigene18683  | Potri.018G098400.3 | 4.7521  | 10.8191 | -1.1869 | Down | 3.34E-07 | 7.95E-07 |
| Unigene103074 | Potri.002G102400.1 | 6.5459  | 14.9031 | -1.1869 | Down | 3.34E-07 | 7.95E-07 |
| Unigene50006  | Potri.016G128400.1 | 4.8049  | 10.9402 | -1.1871 | Down | 4.71E-12 | 1.50E-11 |
| Unigene10305  | Potri.016G060200.3 | 9.5417  | 21.728  | -1.1872 | Down | 4.53E-11 | 1.37E-10 |
| Unigene34661  | Potri.012G045300.4 | 6.5593  | 14.9358 | -1.1872 | Down | 1.22E-21 | 5.72E-21 |
| Unigene8864   | Potri.006G143000.2 | 6.9102  | 15.7357 | -1.1872 | Down | 4.53E-11 | 1.37E-10 |
| Unigene32785  | Potri.001G378500.1 | 3.1083  | 7.0781  | -1.1872 | Down | 7.01E-16 | 2.65E-15 |
| Unigene3002   | Potri.014G056900.1 | 6.1824  | 14.079  | -1.1873 | Down | 1.81E-24 | 9.33E-24 |
| Unigene21297  | Potri.005G136600.1 | 1.7723  | 4.0359  | -1.1873 | Down | 3.34E-06 | 7.38E-06 |
| Unigene21675  | Potri.003G197700.1 | 6.0332  | 13.7392 | -1.1873 | Down | 9.00E-57 | 1.01E-55 |
| Unigene23943  | Potri.002G084900.2 | 17.1318 | 39.017  | -1.1874 | Down | 1.02E-18 | 4.33E-18 |
| Unigene13897  | Potri.015G108100.1 | 18.0875 | 41.1949 | -1.1875 | Down | 1.60E-22 | 7.72E-22 |
| Unigene5095   | Potri.013G048500.1 | 3.8624  | 8.7979  | -1.1877 | Down | 3.41E-05 | 6.86E-05 |
| Unigene52995  | Potri.010G142200.1 | 4.5646  | 10.3976 | -1.1877 | Down | 3.41E-05 | 6.86E-05 |
| Unigene30624  | Potri.008G003100.1 | 10.12   | 23.052  | -1.1877 | Down | 4.26E-09 | 1.15E-08 |
| Unigene51411  | Potri.006G234400.1 | 15.2391 | 34.7125 | -1.1877 | Down | 6.07E-13 | 2.01E-12 |
| Unigene67988  | Potri.002G105800.1 | 2.7955  | 6.3677  | -1.1877 | Down | 3.41E-05 | 6.86E-05 |
| Unigene73587  | Potri.015G007100.2 | 41.5221 | 94.5869 | -1.1878 | Down | 3.35E-27 | 1.88E-26 |
| Unigene12076  | Potri.001G334200.1 | 9.9226  | 22.6042 | -1.1878 | Down | 1.33E-19 | 5.85E-19 |
| Unigene63821  | Potri.013G032400.1 | 4.273   | 9.7346  | -1.1879 | Down | 5.82E-12 | 1.84E-11 |
| Unigene8531   | Potri.007G076500.5 | 18.4733 | 42.0867 | -1.1879 | Down | 1.26E-18 | 5.32E-18 |
| Unigene30232  | Potri.001G174600.1 | 14.7965 | 33.7091 | -1.1879 | Down | 5.82E-12 | 1.84E-11 |
| Unigene119044 | Potri.018G087300.3 | 4.0922  | 9.3235  | -1.188  | Down | 4.18E-08 | 1.06E-07 |
| Unigene16914  | Potri.008G145600.1 | 22.4894 | 51.2446 | -1.1882 | Down | 9.46E-33 | 6.20E-32 |
| Unigene74020  | Potri.006G205200.1 | 19.6956 | 44.8797 | -1.1882 | Down | 7.85E-14 | 2.72E-13 |
| Unigene66029  | Potri.T091800.2    | 4.1982  | 9.5679  | -1.1884 | Down | 3.58E-04 | 6.47E-04 |
| Unigene30736  | Potri.018G129900.2 | 2.2712  | 5.1761  | -1.1884 | Down | 3.58E-04 | 6.47E-04 |
| Unigene23958  | Potri.014G103000.1 | 30.3059 | 69.0683 | -1.1884 | Down | 2.09E-66 | 2.77E-65 |
| Unigene72211  | Potri.014G082100.1 | 32.954  | 75.1034 | -1.1884 | Down | 2.29E-21 | 1.07E-20 |
| Unigene5492   | Potri.010G122500.6 | 33.652  | 76.6942 | -1.1884 | Down | 1.17E-32 | 7.62E-32 |
| Unigene117451 | Potri.009G143400.4 | 2.6716  | 6.0887  | -1.1884 | Down | 3.58E-04 | 6.47E-04 |
| Unigene25067  | Potri.002G028900.3 | 8.8971  | 20.2769 | -1.1884 | Down | 4.14E-07 | 9.82E-07 |
| Unigene27028  | Potri.001G268000.1 | 3.069   | 6.9943  | -1.1884 | Down | 3.58E-04 | 6.47E-04 |
| Unigene38975  | Potri.001G123600.1 | 9.7466  | 22.2129 | -1.1884 | Down | 7.50E-13 | 2.48E-12 |
| Unigene13797  | Potri.017G000500.1 | 12.5436 | 28.589  | -1.1885 | Down | 1.65E-34 | 1.13E-33 |

|               |                    |         |          |         |      |           |           |
|---------------|--------------------|---------|----------|---------|------|-----------|-----------|
| Unigene17073  | Potri.001G256100.3 | 1.5393  | 3.5082   | -1.1885 | Down | 3.58E-04  | 6.47E-04  |
| Unigene93385  | Potri.017G069100.1 | 17.5373 | 39.9737  | -1.1886 | Down | 1.02E-30  | 6.30E-30  |
| Unigene36956  | Potri.011G113900.1 | 38.797  | 88.4368  | -1.1887 | Down | 1.44E-32  | 9.38E-32  |
| Unigene24449  | Potri.010G231100.3 | 6.242   | 14.2288  | -1.1887 | Down | 2.03E-19  | 8.86E-19  |
| Unigene33248  | Potri.004G217800.1 | 47.2521 | 107.7079 | -1.1887 | Down | 9.15E-59  | 1.06E-57  |
| Unigene70926  | Potri.003G146900.1 | 30.4335 | 69.3745  | -1.1887 | Down | 2.03E-19  | 8.86E-19  |
| Unigene50331  | Potri.014G189900.6 | 10.8594 | 24.7554  | -1.1888 | Down | 5.28E-09  | 1.42E-08  |
| Unigene10771  | Potri.004G207200.1 | 2.634   | 6.005    | -1.1889 | Down | 9.70E-14  | 3.34E-13  |
| Unigene11627  | Potri.004G100500.1 | 5.288   | 12.0556  | -1.1889 | Down | 5.90E-26  | 3.18E-25  |
| Unigene12676  | Potri.001G242200.2 | 12.4065 | 28.2849  | -1.1889 | Down | 1.92E-18  | 8.06E-18  |
| Unigene49743  | Potri.015G005400.3 | 32.1217 | 73.2424  | -1.1891 | Down | 5.08E-38  | 3.80E-37  |
| Unigene44910  | Potri.007G116700.1 | 10.0739 | 22.9697  | -1.1891 | Down | 7.77E-27  | 4.30E-26  |
| Unigene3043   | Potri.001G287700.1 | 22.1822 | 50.5793  | -1.1891 | Down | 2.34E-33  | 1.56E-32  |
| Unigene24302  | Potri.004G133600.3 | 21.5945 | 49.2401  | -1.1892 | Down | 7.23E-40  | 5.65E-39  |
| Unigene34844  | Potri.016G055700.1 | 2.422   | 5.5233   | -1.1893 | Down | 5.18E-08  | 1.31E-07  |
| Unigene30406  | Potri.005G182300.1 | 6.6212  | 15.0992  | -1.1893 | Down | 5.18E-08  | 1.31E-07  |
| Unigene80775  | Potri.006G015200.1 | 11.4883 | 26.2008  | -1.1894 | Down | 6.72E-10  | 1.91E-09  |
| Unigene87090  | Potri.012G108700.1 | 9.2349  | 21.0617  | -1.1895 | Down | 6.72E-10  | 1.91E-09  |
| Unigene28466  | Potri.012G052500.2 | 7.8968  | 18.0109  | -1.1895 | Down | 8.90E-12  | 2.79E-11  |
| Unigene34334  | Potri.001G346000.2 | 3.0328  | 6.9168   | -1.1895 | Down | 6.72E-10  | 1.91E-09  |
| Unigene46860  | Potri.008G135700.1 | 15.2215 | 34.7188  | -1.1896 | Down | 1.20E-13  | 4.12E-13  |
| Unigene73367  | Potri.002G160900.4 | 57.2751 | 130.6495 | -1.1897 | Down | 7.19E-37  | 5.23E-36  |
| Unigene21210  | Potri.018G114900.1 | 17.3079 | 39.4889  | -1.19   | Down | 6.89E-173 | 2.96E-171 |
| Unigene54412  | Potri.009G054000.1 | 5.6615  | 12.9167  | -1.19   | Down | 4.25E-05  | 8.45E-05  |
| Unigene100859 | Potri.008G088200.1 | 1.3377  | 3.052    | -1.19   | Down | 4.25E-05  | 8.45E-05  |
| Unigene11139  | Potri.007G050700.1 | 7.5939  | 17.3254  | -1.19   | Down | 7.89E-24  | 3.98E-23  |
| Unigene68498  | Potri.005G122600.1 | 2.3838  | 5.4386   | -1.19   | Down | 4.25E-05  | 8.45E-05  |
| Unigene54340  | Potri.004G173700.3 | 8.726   | 19.9083  | -1.19   | Down | 5.14E-07  | 1.21E-06  |
| Unigene95117  | Potri.003G126700.1 | 11.6347 | 26.5444  | -1.19   | Down | 6.54E-09  | 1.75E-08  |
| Unigene40305  | Potri.001G246900.1 | 18.7725 | 42.829   | -1.19   | Down | 6.24E-35  | 4.31E-34  |
| Unigene104092 | Potri.001G166900.1 | 1.8732  | 4.2738   | -1.19   | Down | 4.25E-05  | 8.45E-05  |
| Unigene49476  | Potri.001G148300.1 | 2.775   | 6.3311   | -1.19   | Down | 4.25E-05  | 8.45E-05  |
| Unigene43993  | Potri.001G093800.1 | 2.7884  | 6.3618   | -1.19   | Down | 8.58E-11  | 2.56E-10  |
| Unigene41743  | Potri.015G042600.1 | 18.4209 | 42.0342  | -1.1902 | Down | 3.82E-19  | 1.65E-18  |
| Unigene7218   | Potri.012G058100.2 | 21.0772 | 48.0947  | -1.1902 | Down | 5.31E-21  | 2.44E-20  |
| Unigene49399  | Potri.019G012300.3 | 4.5639  | 10.4151  | -1.1903 | Down | 1.48E-13  | 5.07E-13  |
| Unigene18899  | Potri.002G016800.1 | 6.8285  | 15.5836  | -1.1904 | Down | 1.10E-11  | 3.44E-11  |
| Unigene28697  | Potri.019G132300.1 | 8.1225  | 18.5382  | -1.1905 | Down | 3.61E-18  | 1.50E-17  |
| Unigene73005  | Potri.006G228500.9 | 40.6904 | 92.8682  | -1.1905 | Down | 1.80E-26  | 9.85E-26  |



|               |                    |         |          |         |      |          |          |
|---------------|--------------------|---------|----------|---------|------|----------|----------|
| Unigene28288  | Potri.004G160800.3 | 8.193   | 18.6989  | -1.1905 | Down | 8.31E-10 | 2.34E-09 |
| Unigene34261  | Potri.001G468700.2 | 5.4203  | 12.3711  | -1.1905 | Down | 1.28E-24 | 6.62E-24 |
| Unigene54125  | Potri.001G300300.1 | 7.8308  | 17.8724  | -1.1905 | Down | 8.31E-10 | 2.34E-09 |
| Unigene35995  | Potri.008G054100.1 | 15.9855 | 36.4856  | -1.1906 | Down | 2.62E-16 | 1.01E-15 |
| Unigene85200  | Potri.006G032300.1 | 7.6947  | 17.5635  | -1.1906 | Down | 6.43E-08 | 1.61E-07 |
| Unigene17853  | Potri.003G173400.2 | 6.4917  | 14.8176  | -1.1906 | Down | 6.43E-08 | 1.61E-07 |
| Unigene77727  | Potri.001G209500.1 | 9.445   | 21.5586  | -1.1906 | Down | 6.43E-08 | 1.61E-07 |
| Unigene16859  | Potri.012G069700.1 | 14.157  | 32.3153  | -1.1907 | Down | 1.69E-25 | 8.95E-25 |
| Unigene47510  | Potri.004G140400.2 | 6.1758  | 14.0978  | -1.1908 | Down | 1.42E-12 | 4.63E-12 |
| Unigene11431  | Potri.001G438400.1 | 9.9401  | 22.6919  | -1.1908 | Down | 1.60E-46 | 1.45E-45 |
| Unigene7544   | Potri.014G156400.1 | 4.4129  | 10.0746  | -1.1909 | Down | 1.06E-10 | 3.15E-10 |
| Unigene23595  | Potri.016G120700.1 | 4.7449  | 10.8334  | -1.191  | Down | 4.46E-18 | 1.85E-17 |
| Unigene13084  | Potri.002G138600.1 | 21.7774 | 49.7198  | -1.191  | Down | 7.69E-53 | 7.95E-52 |
| Unigene53385  | Potri.009G102900.1 | 11.543  | 26.357   | -1.1912 | Down | 3.24E-16 | 1.24E-15 |
| Unigene35196  | Potri.003G106500.3 | 26.7145 | 61.0019  | -1.1912 | Down | 5.83E-19 | 2.50E-18 |
| Unigene44893  | Potri.001G349900.1 | 6.8786  | 15.7088  | -1.1914 | Down | 4.22E-17 | 1.68E-16 |
| Unigene13523  | Potri.006G060100.2 | 9.3841  | 21.4321  | -1.1915 | Down | 3.11E-36 | 2.23E-35 |
| Unigene33419  | Potri.019G071700.1 | 11.7294 | 26.7901  | -1.1916 | Down | 5.51E-18 | 2.27E-17 |
| Unigene103268 | Potri.017G144900.2 | 2.1686  | 4.9531   | -1.1916 | Down | 4.48E-04 | 7.97E-04 |
| Unigene81348  | Potri.017G061900.1 | 14.6849 | 33.5404  | -1.1916 | Down | 1.75E-12 | 5.70E-12 |
| Unigene9922   | Potri.016G096500.1 | 14.9918 | 34.2414  | -1.1916 | Down | 3.08E-15 | 1.13E-14 |
| Unigene46292  | Potri.016G062000.3 | 17.5941 | 40.1852  | -1.1916 | Down | 1.75E-12 | 5.70E-12 |
| Unigene6155   | Potri.014G165500.2 | 4.5266  | 10.3389  | -1.1916 | Down | 4.48E-04 | 7.97E-04 |
| Unigene105831 | Potri.010G160400.1 | 1.9108  | 4.3644   | -1.1916 | Down | 4.48E-04 | 7.97E-04 |
| Unigene28478  | Potri.009G058600.1 | 4.0455  | 9.24     | -1.1916 | Down | 6.38E-07 | 1.49E-06 |
| Unigene45418  | Potri.006G258100.1 | 2.3788  | 5.4332   | -1.1916 | Down | 4.48E-04 | 7.97E-04 |
| Unigene53060  | Potri.005G204400.1 | 8.8808  | 20.284   | -1.1916 | Down | 6.38E-07 | 1.49E-06 |
| Unigene16118  | Potri.001G407100.2 | 14.8014 | 33.8066  | -1.1916 | Down | 1.75E-12 | 5.70E-12 |
| Unigene27111  | Potri.001G404600.1 | 2.83    | 6.4638   | -1.1916 | Down | 6.38E-07 | 1.49E-06 |
| Unigene72346  | Potri.014G112400.6 | 28.6084 | 65.3497  | -1.1917 | Down | 7.20E-19 | 3.07E-18 |
| Unigene107496 | Potri.006G117400.3 | 33.9593 | 77.5714  | -1.1917 | Down | 1.31E-21 | 6.15E-21 |
| Unigene18355  | Potri.014G172500.1 | 5.0054  | 11.4351  | -1.1919 | Down | 9.42E-20 | 4.15E-19 |
| Unigene716    | Potri.013G004600.1 | 11.5722 | 26.4376  | -1.1919 | Down | 4.17E-26 | 2.26E-25 |
| Unigene5479   | Potri.005G074700.1 | 6.1047  | 13.946   | -1.1919 | Down | 1.72E-22 | 8.30E-22 |
| Unigene4470   | Potri.002G055300.1 | 49.2534 | 112.5186 | -1.1919 | Down | 2.02E-61 | 2.46E-60 |
| Unigene15178  | Potri.014G119100.1 | 8.2572  | 18.8656  | -1.192  | Down | 7.97E-08 | 1.99E-07 |
| Unigene20396  | Potri.008G210100.1 | 6.8897  | 15.7413  | -1.192  | Down | 7.97E-08 | 1.99E-07 |
| Unigene14470  | Potri.001G471100.1 | 8.7942  | 20.0926  | -1.192  | Down | 7.97E-08 | 1.99E-07 |
| Unigene5457   | Potri.005G104700.1 | 5.3905  | 12.3167  | -1.1921 | Down | 6.80E-18 | 2.80E-17 |

|               |                    |         |          |         |      |          |          |
|---------------|--------------------|---------|----------|---------|------|----------|----------|
| Unigene50113  | Potri.019G128600.1 | 5.6308  | 12.867   | -1.1923 | Down | 8.89E-19 | 3.78E-18 |
| Unigene4842   | Potri.017G110700.1 | 8.4019  | 19.2011  | -1.1924 | Down | 1.00E-08 | 2.66E-08 |
| Unigene8385   | Potri.010G237800.2 | 2.0047  | 4.5814   | -1.1924 | Down | 5.29E-05 | 1.05E-04 |
| Unigene27471  | Potri.010G174800.4 | 44.7939 | 102.3655 | -1.1924 | Down | 1.98E-58 | 2.29E-57 |
| Unigene54167  | Potri.009G021900.1 | 5.8614  | 13.3951  | -1.1924 | Down | 5.29E-05 | 1.05E-04 |
| Unigene15864  | Potri.008G155100.1 | 1.4549  | 3.325    | -1.1924 | Down | 5.29E-05 | 1.05E-04 |
| Unigene95767  | Potri.006G056400.2 | 3.4869  | 7.9687   | -1.1924 | Down | 5.29E-05 | 1.05E-04 |
| Unigene116130 | Potri.006G029900.1 | 3.9834  | 9.1034   | -1.1924 | Down | 5.29E-05 | 1.05E-04 |
| Unigene19418  | Potri.003G002400.1 | 3.3539  | 7.6648   | -1.1924 | Down | 5.29E-05 | 1.05E-04 |
| Unigene105434 | Potri.001G458200.2 | 1.7736  | 4.0533   | -1.1924 | Down | 5.29E-05 | 1.05E-04 |
| Unigene24266  | Potri.001G470300.4 | 4.1694  | 9.5303   | -1.1927 | Down | 1.27E-09 | 3.55E-09 |
| Unigene111529 | Potri.008G173900.1 | 18.4096 | 42.0824  | -1.1928 | Down | 3.62E-14 | 1.27E-13 |
| Unigene6739   | Potri.014G091800.1 | 20.2006 | 46.183   | -1.193  | Down | 1.92E-29 | 1.14E-28 |
| Unigene18883  | Potri.013G076200.1 | 13.4053 | 30.6488  | -1.193  | Down | 2.53E-30 | 1.55E-29 |
| Unigene376    | Potri.009G147600.1 | 23.1823 | 53.0012  | -1.193  | Down | 2.37E-72 | 3.46E-71 |
| Unigene43775  | Potri.001G357000.2 | 32.1372 | 73.477   | -1.193  | Down | 5.35E-50 | 5.22E-49 |
| Unigene79065  | Potri.017G137300.1 | 21.6027 | 49.3943  | -1.1931 | Down | 7.95E-17 | 3.13E-16 |
| Unigene1903   | Potri.001G296500.1 | 6.3942  | 14.6198  | -1.1931 | Down | 2.08E-11 | 6.42E-11 |
| Unigene108262 | Potri.012G034800.1 | 8.8722  | 20.2877  | -1.1932 | Down | 7.92E-07 | 1.84E-06 |
| Unigene35187  | Potri.009G140000.1 | 8.5406  | 19.5293  | -1.1932 | Down | 7.92E-07 | 1.84E-06 |
| Unigene7548   | Potri.009G095400.1 | 17.8841 | 40.8923  | -1.1932 | Down | 1.92E-37 | 1.42E-36 |
| Unigene32040  | Potri.005G176300.1 | 13.9163 | 31.8218  | -1.1932 | Down | 6.59E-50 | 6.42E-49 |
| Unigene92463  | Potri.004G166600.1 | 3.8156  | 8.725    | -1.1932 | Down | 7.92E-07 | 1.84E-06 |
| Unigene35071  | Potri.019G062600.1 | 21.9456 | 50.1882  | -1.1934 | Down | 2.17E-61 | 2.64E-60 |
| Unigene116016 | Potri.018G023800.1 | 12.9631 | 29.6448  | -1.1934 | Down | 3.46E-13 | 1.16E-12 |
| Unigene3585   | Potri.016G110800.1 | 8.7134  | 19.9279  | -1.1935 | Down | 9.88E-08 | 2.45E-07 |
| Unigene16701  | Potri.013G002400.2 | 9.2842  | 21.2332  | -1.1935 | Down | 9.88E-08 | 2.45E-07 |
| Unigene3535   | Potri.006G092400.1 | 43.261  | 98.9441  | -1.1935 | Down | 2.01E-60 | 2.41E-59 |
| Unigene38057  | Potri.005G234000.6 | 54.2539 | 124.0828 | -1.1935 | Down | 1.91E-52 | 1.96E-51 |
| Unigene48425  | Potri.001G129600.1 | 14.7133 | 33.6499  | -1.1935 | Down | 4.48E-14 | 1.57E-13 |
| Unigene25101  | Potri.009G004500.2 | 19.3214 | 44.1926  | -1.1936 | Down | 3.99E-22 | 1.90E-21 |
| Unigene24886  | Potri.008G084800.5 | 23.038  | 52.6938  | -1.1936 | Down | 2.91E-29 | 1.73E-28 |
| Unigene76315  | Potri.016G019800.3 | 21.5509 | 49.2939  | -1.1937 | Down | 7.54E-16 | 2.85E-15 |
| Unigene21578  | Potri.001G289200.3 | 3.7015  | 8.4665   | -1.1937 | Down | 7.54E-16 | 2.85E-15 |
| Unigene41751  | Potri.010G099200.1 | 35.7064 | 81.683   | -1.1939 | Down | 2.09E-43 | 1.78E-42 |
| Unigene42581  | Potri.001G357700.1 | 4.6496  | 10.6366  | -1.1939 | Down | 1.57E-26 | 8.60E-26 |
| Unigene24240  | Potri.011G105400.1 | 13.0055 | 29.7552  | -1.194  | Down | 1.11E-40 | 8.82E-40 |
| Unigene2322   | Potri.008G084800.2 | 13.2655 | 30.3491  | -1.194  | Down | 2.86E-20 | 1.29E-19 |
| Unigene53532  | Potri.002G097200.2 | 16.037  | 36.6908  | -1.194  | Down | 2.58E-11 | 7.91E-11 |

|               |                    |         |          |         |      |          |          |
|---------------|--------------------|---------|----------|---------|------|----------|----------|
| Unigene38876  | Potri.010G209000.2 | 23.472  | 53.7055  | -1.1941 | Down | 8.49E-24 | 4.27E-23 |
| Unigene28380  | Potri.004G123600.5 | 22.426  | 51.3109  | -1.1941 | Down | 1.45E-33 | 9.66E-33 |
| Unigene24814  | Potri.002G238300.1 | 34.9629 | 79.9975  | -1.1941 | Down | 6.03E-46 | 5.41E-45 |
| Unigene5423   | Potri.009G053400.3 | 11.6215 | 26.5914  | -1.1942 | Down | 4.28E-13 | 1.43E-12 |
| Unigene85     | Potri.003G040000.1 | 4.5259  | 10.3559  | -1.1942 | Down | 3.35E-36 | 2.40E-35 |
| Unigene23697  | Potri.010G023100.1 | 4.5544  | 10.4224  | -1.1944 | Down | 1.21E-16 | 4.74E-16 |
| Unigene33292  | Potri.006G259700.2 | 48.6058 | 111.2408 | -1.1945 | Down | 1.07E-97 | 2.22E-96 |
| Unigene3593   | Potri.005G127800.2 | 23.5255 | 53.8429  | -1.1945 | Down | 7.97E-23 | 3.89E-22 |
| Unigene29010  | Potri.005G127200.1 | 7.8682  | 18.0077  | -1.1945 | Down | 6.07E-22 | 2.88E-21 |
| Unigene42757  | Potri.001G102900.7 | 25.5887 | 58.5641  | -1.1945 | Down | 1.66E-62 | 2.06E-61 |
| Unigene45043  | Potri.006G015100.1 | 24.3918 | 55.8298  | -1.1946 | Down | 7.21E-30 | 4.36E-29 |
| Unigene6239   | Potri.001G352300.3 | 22.6527 | 51.8487  | -1.1946 | Down | 5.47E-29 | 3.23E-28 |
| Unigene49203  | Potri.001G143200.2 | 17.1709 | 39.3001  | -1.1946 | Down | 1.38E-24 | 7.11E-24 |
| Unigene50707  | Potri.016G020800.2 | 1.5283  | 3.4988   | -1.1949 | Down | 6.59E-05 | 1.29E-04 |
| Unigene57046  | Potri.018G037700.3 | 4.0433  | 9.2568   | -1.195  | Down | 7.98E-06 | 1.70E-05 |
| Unigene21444  | Potri.016G085300.1 | 10.2293 | 23.419   | -1.195  | Down | 1.28E-73 | 1.91E-72 |
| Unigene53755  | Potri.016G018800.1 | 4.4371  | 10.1583  | -1.195  | Down | 6.59E-05 | 1.29E-04 |
| Unigene22613  | Potri.014G112900.2 | 9.428   | 21.5845  | -1.195  | Down | 8.30E-37 | 6.04E-36 |
| Unigene59078  | Potri.014G103900.4 | 3.9392  | 9.0185   | -1.195  | Down | 4.10E-12 | 1.31E-11 |
| Unigene50246  | Potri.010G215000.1 | 5.0362  | 11.5299  | -1.195  | Down | 4.10E-12 | 1.31E-11 |
| Unigene105075 | Potri.010G026900.1 | 3.166   | 7.2483   | -1.195  | Down | 6.59E-05 | 1.29E-04 |
| Unigene40123  | Potri.009G059700.1 | 3.8093  | 8.721    | -1.195  | Down | 9.83E-07 | 2.26E-06 |
| Unigene78317  | Potri.008G182300.1 | 40.4605 | 92.6303  | -1.195  | Down | 8.90E-30 | 5.37E-29 |
| Unigene51987  | Potri.006G099600.1 | 3.0141  | 6.9005   | -1.195  | Down | 5.60E-04 | 9.88E-04 |
| Unigene27275  | Potri.005G099800.1 | 12.2294 | 27.9979  | -1.195  | Down | 2.49E-10 | 7.24E-10 |
| Unigene10783  | Potri.005G075700.1 | 16.5683 | 37.9314  | -1.195  | Down | 1.70E-88 | 3.12E-87 |
| Unigene42972  | Potri.005G044900.6 | 10.47   | 23.9701  | -1.195  | Down | 1.46E-38 | 1.10E-37 |
| Unigene8558   | Potri.004G219000.2 | 8.5664  | 19.6119  | -1.195  | Down | 9.83E-07 | 2.26E-06 |
| Unigene31     | Potri.003G220800.1 | 2.7269  | 6.2429   | -1.195  | Down | 1.23E-07 | 3.02E-07 |
| Unigene8579   | Potri.003G060600.3 | 11.5984 | 26.5535  | -1.195  | Down | 3.19E-11 | 9.74E-11 |
| Unigene49179  | Potri.002G076500.1 | 3.0922  | 7.0793   | -1.195  | Down | 9.83E-07 | 2.26E-06 |
| Unigene101871 | Potri.002G022000.1 | 1.8534  | 4.2432   | -1.195  | Down | 5.60E-04 | 9.88E-04 |
| Unigene88855  | Potri.001G456300.1 | 43.6252 | 99.8755  | -1.195  | Down | 1.39E-45 | 1.24E-44 |
| Unigene28050  | Potri.001G324700.1 | 1.8465  | 4.2274   | -1.195  | Down | 7.98E-06 | 1.70E-05 |
| Unigene18025  | Potri.001G085200.1 | 22.1034 | 50.6036  | -1.195  | Down | 1.39E-45 | 1.24E-44 |
| Unigene52257  | Potri.008G064400.1 | 26.5289 | 60.7451  | -1.1952 | Down | 5.54E-42 | 4.55E-41 |
| Unigene42592  | Potri.009G078700.2 | 13.7006 | 31.3744  | -1.1953 | Down | 1.54E-51 | 1.55E-50 |
| Unigene23541  | Potri.009G066000.2 | 31.8742 | 72.9909  | -1.1953 | Down | 2.72E-53 | 2.84E-52 |
| Unigene12159  | Potri.007G095600.1 | 10.0437 | 22.9993  | -1.1953 | Down | 1.10E-29 | 6.60E-29 |

|               |                    |         |          |         |      |           |           |
|---------------|--------------------|---------|----------|---------|------|-----------|-----------|
| Unigene7330   | Potri.006G020700.6 | 14.1159 | 32.3295  | -1.1955 | Down | 3.15E-18  | 1.31E-17  |
| Unigene45961  | Potri.003G079600.1 | 15.8347 | 36.2678  | -1.1956 | Down | 1.85E-16  | 7.18E-16  |
| Unigene68750  | Potri.002G047400.2 | 4.8631  | 11.1399  | -1.1958 | Down | 6.53E-13  | 2.17E-12  |
| Unigene69712  | Potri.017G092600.3 | 2.7879  | 6.3868   | -1.1959 | Down | 3.94E-11  | 1.20E-10  |
| Unigene12920  | Potri.005G069600.2 | 11.0189 | 25.2437  | -1.1959 | Down | 8.70E-21  | 3.97E-20  |
| Unigene25772  | Potri.003G057800.1 | 13.4222 | 30.7478  | -1.1959 | Down | 5.07E-12  | 1.61E-11  |
| Unigene53412  | Potri.001G135200.1 | 14.1174 | 32.3403  | -1.1959 | Down | 5.07E-12  | 1.61E-11  |
| Unigene75944  | Potri.016G085800.2 | 13.2137 | 30.2741  | -1.196  | Down | 3.08E-10  | 8.91E-10  |
| Unigene35102  | Potri.008G071800.1 | 6.6453  | 15.2249  | -1.196  | Down | 5.25E-46  | 4.72E-45  |
| Unigene48487  | Potri.001G407300.2 | 8.0291  | 18.3954  | -1.196  | Down | 3.08E-10  | 8.91E-10  |
| Unigene32041  | Potri.006G221700.3 | 11.0577 | 25.337   | -1.1962 | Down | 4.74E-32  | 3.05E-31  |
| Unigene48172  | Potri.010G039700.2 | 16.1495 | 37.0057  | -1.1963 | Down | 2.43E-23  | 1.21E-22  |
| Unigene44100  | Potri.018G002900.2 | 12.6032 | 28.8831  | -1.1964 | Down | 1.07E-20  | 4.89E-20  |
| Unigene45250  | Potri.015G022900.1 | 13.1329 | 30.0954  | -1.1964 | Down | 1.56E-28  | 9.07E-28  |
| Unigene32708  | Potri.018G014000.1 | 8.0495  | 18.4483  | -1.1965 | Down | 4.53E-44  | 3.89E-43  |
| Unigene31891  | Potri.018G046700.2 | 8.7922  | 20.153   | -1.1967 | Down | 7.41E-45  | 6.48E-44  |
| Unigene90467  | Potri.014G114700.1 | 92.4211 | 211.8379 | -1.1967 | Down | 5.09E-106 | 1.17E-104 |
| Unigene27022  | Potri.006G061700.4 | 22.592  | 51.7834  | -1.1967 | Down | 4.80E-18  | 1.99E-17  |
| Unigene47390  | Potri.015G094800.2 | 8.2304  | 18.8663  | -1.1968 | Down | 1.22E-06  | 2.78E-06  |
| Unigene23393  | Potri.009G018900.2 | 2.06    | 4.7221   | -1.1968 | Down | 1.22E-06  | 2.78E-06  |
| Unigene78859  | Potri.008G102800.1 | 7.3351  | 16.8139  | -1.1968 | Down | 1.22E-06  | 2.78E-06  |
| Unigene68904  | Potri.007G109000.2 | 1.9809  | 4.5407   | -1.1968 | Down | 1.22E-06  | 2.78E-06  |
| Unigene17570  | Potri.007G070900.1 | 3.8699  | 8.8709   | -1.1968 | Down | 1.22E-06  | 2.78E-06  |
| Unigene33212  | Potri.006G280100.1 | 7.7915  | 17.8601  | -1.1968 | Down | 6.27E-12  | 1.98E-11  |
| Unigene87367  | Potri.006G207900.2 | 22.2613 | 51.0288  | -1.1968 | Down | 2.28E-22  | 1.10E-21  |
| Unigene90358  | Potri.008G118900.1 | 13.0548 | 29.9274  | -1.1969 | Down | 2.82E-16  | 1.09E-15  |
| Unigene40732  | Potri.018G063700.4 | 15.5935 | 35.75    | -1.197  | Down | 2.17E-15  | 8.04E-15  |
| Unigene118571 | Potri.012G061100.1 | 3.1901  | 7.3144   | -1.1971 | Down | 9.92E-06  | 2.10E-05  |
| Unigene6613   | Potri.002G092700.1 | 3.8792  | 8.8943   | -1.1971 | Down | 9.92E-06  | 2.10E-05  |
| Unigene26243  | Potri.001G179100.1 | 23.9126 | 54.828   | -1.1971 | Down | 1.80E-27  | 1.01E-26  |
| Unigene9299   | Potri.015G079800.1 | 36.6509 | 84.0395  | -1.1972 | Down | 1.37E-26  | 7.50E-26  |
| Unigene5790   | Potri.014G177500.1 | 44.1054 | 101.1296 | -1.1972 | Down | 1.12E-56  | 1.26E-55  |
| Unigene112768 | Potri.014G101800.4 | 5.9133  | 13.5584  | -1.1972 | Down | 9.92E-06  | 2.10E-05  |
| Unigene69688  | Potri.008G178400.3 | 1.846   | 4.2327   | -1.1972 | Down | 9.92E-06  | 2.10E-05  |
| Unigene44000  | Potri.003G140600.2 | 50.0897 | 114.8515 | -1.1972 | Down | 2.23E-94  | 4.44E-93  |
| Unigene23779  | Potri.001G357700.1 | 10.1933 | 23.3749  | -1.1973 | Down | 2.14E-21  | 9.99E-21  |
| Unigene10831  | Potri.012G102800.2 | 6.3465  | 14.5546  | -1.1974 | Down | 1.64E-20  | 7.41E-20  |
| Unigene12075  | Potri.005G110700.5 | 7.829   | 17.9538  | -1.1974 | Down | 4.54E-17  | 1.81E-16  |
| Unigene8329   | Potri.002G072100.3 | 11.1645 | 25.6055  | -1.1975 | Down | 3.48E-16  | 1.34E-15  |

|               |                    |         |         |         |      |          |          |
|---------------|--------------------|---------|---------|---------|------|----------|----------|
| Unigene44152  | Potri.009G020900.1 | 19.4866 | 44.6932 | -1.1976 | Down | 1.25E-19 | 5.49E-19 |
| Unigene33706  | Potri.005G046500.3 | 25.0622 | 57.4828 | -1.1976 | Down | 6.28E-30 | 3.80E-29 |
| Unigene42077  | Potri.015G035800.1 | 3.8802  | 8.9001  | -1.1977 | Down | 8.22E-05 | 1.59E-04 |
| Unigene114382 | Potri.014G141200.2 | 12.8954 | 29.5787 | -1.1977 | Down | 7.75E-12 | 2.44E-11 |
| Unigene93347  | Potri.014G134100.2 | 38.884  | 89.1898 | -1.1977 | Down | 1.21E-66 | 1.62E-65 |
| Unigene12193  | Potri.012G041200.1 | 1.8471  | 4.2368  | -1.1977 | Down | 8.22E-05 | 1.59E-04 |
| Unigene35826  | Potri.012G002600.4 | 14.575  | 33.4314 | -1.1977 | Down | 7.75E-12 | 2.44E-11 |
| Unigene52258  | Potri.006G041600.2 | 3.706   | 8.5007  | -1.1977 | Down | 8.22E-05 | 1.59E-04 |
| Unigene17393  | Potri.001G340900.1 | 4.5703  | 10.4831 | -1.1977 | Down | 2.37E-08 | 6.11E-08 |
| Unigene35087  | Potri.014G141700.1 | 12.8193 | 29.4109 | -1.198  | Down | 2.38E-38 | 1.79E-37 |
| Unigene23254  | Potri.010G146100.2 | 19.509  | 44.7591 | -1.198  | Down | 5.62E-23 | 2.76E-22 |
| Unigene30025  | Potri.001G091900.1 | 7.6953  | 17.6542 | -1.198  | Down | 6.04E-11 | 1.82E-10 |
| Unigene32844  | Potri.012G036600.1 | 6.7462  | 15.4787 | -1.1981 | Down | 4.74E-34 | 3.21E-33 |
| Unigene40119  | Potri.003G112200.1 | 3.8734  | 8.8871  | -1.1981 | Down | 1.88E-07 | 4.58E-07 |
| Unigene39098  | Potri.016G110800.1 | 20.4018 | 46.8128 | -1.1982 | Down | 1.26E-30 | 7.80E-30 |
| Unigene14764  | Potri.012G135900.1 | 4.1474  | 9.5168  | -1.1983 | Down | 1.18E-18 | 4.99E-18 |
| Unigene110833 | Potri.006G235200.3 | 25.3045 | 58.065  | -1.1983 | Down | 1.18E-18 | 4.99E-18 |
| Unigene67343  | Potri.003G117700.1 | 6.4504  | 14.802  | -1.1983 | Down | 8.40E-41 | 6.71E-40 |
| Unigene28369  | Potri.016G005900.1 | 6.7369  | 15.4604 | -1.1984 | Down | 7.24E-29 | 4.26E-28 |
| Unigene29376  | Potri.004G119000.2 | 23.3122 | 53.4966 | -1.1984 | Down | 7.74E-35 | 5.33E-34 |
| Unigene42857  | Potri.006G185700.1 | 8.1762  | 18.764  | -1.1985 | Down | 3.65E-55 | 3.95E-54 |
| Unigene38382  | Potri.017G064900.1 | 3.3976  | 7.7983  | -1.1986 | Down | 1.52E-06 | 3.44E-06 |
| Unigene69679  | Potri.014G132100.1 | 3.8907  | 8.93    | -1.1986 | Down | 1.52E-06 | 3.44E-06 |
| Unigene28262  | Potri.011G080600.2 | 11.4768 | 26.3421 | -1.1986 | Down | 9.58E-12 | 3.00E-11 |
| Unigene104586 | Potri.006G018000.1 | 2.6978  | 6.1921  | -1.1986 | Down | 1.52E-06 | 3.44E-06 |
| Unigene26422  | Potri.T088100.2    | 3.0031  | 6.8929  | -1.1987 | Down | 3.71E-09 | 1.01E-08 |
| Unigene48430  | Potri.008G088200.1 | 3.3381  | 7.6618  | -1.1987 | Down | 3.71E-09 | 1.01E-08 |
| Unigene101993 | Potri.001G403200.1 | 1.7192  | 3.946   | -1.1987 | Down | 1.52E-06 | 3.44E-06 |
| Unigene38986  | Potri.001G211000.6 | 27.8084 | 63.8274 | -1.1987 | Down | 1.55E-52 | 1.60E-51 |
| Unigene33600  | Potri.009G005900.1 | 14.9198 | 34.2488 | -1.1988 | Down | 4.03E-21 | 1.86E-20 |
| Unigene78972  | Potri.008G117600.2 | 34.6464 | 79.5297 | -1.1988 | Down | 3.16E-26 | 1.72E-25 |
| Unigene44763  | Potri.001G084300.1 | 5.8673  | 13.4703 | -1.199  | Down | 7.47E-11 | 2.24E-10 |
| Unigene9577   | Potri.015G013400.2 | 17.9087 | 41.1167 | -1.1991 | Down | 1.11E-17 | 4.55E-17 |
| Unigene31900  | Potri.010G119100.1 | 4.5183  | 10.3736 | -1.1991 | Down | 1.11E-17 | 4.55E-17 |
| Unigene51889  | Potri.003G115500.3 | 9.402   | 21.5871 | -1.1991 | Down | 2.93E-08 | 7.54E-08 |
| Unigene9778   | Potri.002G135300.1 | 7.7128  | 17.7087 | -1.1991 | Down | 2.93E-08 | 7.54E-08 |
| Unigene19820  | Potri.001G135800.1 | 21.2147 | 48.7093 | -1.1991 | Down | 1.10E-28 | 6.44E-28 |
| Unigene53599  | Potri.005G021700.1 | 16.6336 | 38.194  | -1.1992 | Down | 1.53E-12 | 4.98E-12 |
| Unigene22530  | Potri.013G077800.1 | 5.7735  | 13.2587 | -1.1994 | Down | 5.84E-10 | 1.67E-09 |

|               |                    |         |          |         |      |          |          |
|---------------|--------------------|---------|----------|---------|------|----------|----------|
| Unigene2507   | Potri.011G120000.1 | 6.9208  | 15.8936  | -1.1994 | Down | 1.06E-22 | 5.14E-22 |
| Unigene12250  | Potri.009G160200.1 | 11.8709 | 27.2613  | -1.1994 | Down | 1.06E-22 | 5.14E-22 |
| Unigene7152   | Potri.008G200600.1 | 15.2735 | 35.0754  | -1.1994 | Down | 1.06E-22 | 5.14E-22 |
| Unigene60413  | Potri.003G148700.2 | 3.7104  | 8.5209   | -1.1994 | Down | 1.23E-05 | 2.59E-05 |
| Unigene12487  | Potri.008G102700.1 | 9.5245  | 21.8745  | -1.1995 | Down | 3.80E-20 | 1.70E-19 |
| Unigene2681   | Potri.010G029700.1 | 7.5756  | 17.4004  | -1.1997 | Down | 1.38E-17 | 5.59E-17 |
| Unigene11050  | Potri.008G214900.2 | 4.2582  | 9.7812   | -1.1998 | Down | 3.65E-25 | 1.92E-24 |
| Unigene69499  | Potri.016G110000.3 | 3.2106  | 7.3758   | -1.2    | Down | 4.59E-09 | 1.24E-08 |
| Unigene20800  | Potri.004G211500.3 | 22.5289 | 51.7585  | -1.2    | Down | 2.22E-18 | 9.29E-18 |
| Unigene30255  | Potri.010G182400.1 | 10.3541 | 23.7886  | -1.2001 | Down | 9.24E-11 | 2.75E-10 |
| Unigene33817  | Potri.002G010600.1 | 5.8486  | 13.4379  | -1.2001 | Down | 1.89E-12 | 6.12E-12 |
| Unigene28704  | Potri.001G220600.1 | 21.1683 | 48.6344  | -1.2001 | Down | 1.68E-38 | 1.27E-37 |
| Unigene5991   | Potri.008G149000.1 | 27.6591 | 63.5544  | -1.2002 | Down | 2.06E-28 | 1.20E-27 |
| Unigene7361   | Potri.010G026100.1 | 30.5178 | 70.1271  | -1.2003 | Down | 1.35E-52 | 1.39E-51 |
| Unigene78000  | Potri.019G011300.1 | 4.782   | 10.9908  | -1.2006 | Down | 1.02E-04 | 1.97E-04 |
| Unigene9557   | Potri.015G090300.1 | 3.5808  | 8.2299   | -1.2006 | Down | 3.64E-08 | 9.29E-08 |
| Unigene22317  | Potri.012G065900.1 | 3.4115  | 7.841    | -1.2006 | Down | 3.01E-13 | 1.01E-12 |
| Unigene106924 | Potri.004G182900.4 | 3.7975  | 8.728    | -1.2006 | Down | 1.88E-06 | 4.24E-06 |
| Unigene41592  | Potri.004G043100.2 | 5.9521  | 13.6801  | -1.2006 | Down | 1.88E-06 | 4.24E-06 |
| Unigene97175  | Potri.003G133900.4 | 1.4297  | 3.286    | -1.2006 | Down | 1.88E-06 | 4.24E-06 |
| Unigene118245 | Potri.001G309100.1 | 2.6643  | 6.1235   | -1.2006 | Down | 1.02E-04 | 1.97E-04 |
| Unigene94544  | Potri.001G008000.1 | 3.2247  | 7.4117   | -1.2006 | Down | 1.02E-04 | 1.97E-04 |
| Unigene75391  | Potri.001G004500.1 | 21.532  | 49.5009  | -1.201  | Down | 1.00E-15 | 3.76E-15 |
| Unigene35596  | Potri.012G136900.1 | 45.4915 | 104.5942 | -1.2011 | Down | 1.10E-30 | 6.80E-30 |
| Unigene26524  | Potri.009G104300.1 | 44.6937 | 102.7644 | -1.2012 | Down | 4.11E-62 | 5.07E-61 |
| Unigene31059  | Potri.008G078500.3 | 10.1613 | 23.3635  | -1.2012 | Down | 1.14E-10 | 3.39E-10 |
| Unigene36409  | Potri.005G204500.1 | 15.2167 | 34.9871  | -1.2012 | Down | 1.14E-10 | 3.38E-10 |
| Unigene3396   | Potri.002G093400.1 | 16.2258 | 37.3072  | -1.2012 | Down | 7.13E-20 | 3.16E-19 |
| Unigene6638   | Potri.008G143700.1 | 15.6962 | 36.094   | -1.2013 | Down | 2.45E-22 | 1.17E-21 |
| Unigene46657  | Potri.016G043000.1 | 7.1018  | 16.3313  | -1.2014 | Down | 7.71E-15 | 2.79E-14 |
| Unigene43044  | Potri.008G146700.1 | 12.5251 | 28.8027  | -1.2014 | Down | 3.73E-47 | 3.44E-46 |
| Unigene6988   | Potri.006G153600.1 | 3.4759  | 7.9938   | -1.2015 | Down | 2.90E-07 | 6.95E-07 |
| Unigene17657  | Potri.003G173800.1 | 9.4845  | 21.812   | -1.2015 | Down | 3.72E-13 | 1.25E-12 |
| Unigene17533  | Potri.019G035600.1 | 13.6604 | 31.4175  | -1.2016 | Down | 2.59E-17 | 1.04E-16 |
| Unigene43620  | Potri.015G008500.1 | 10.7125 | 24.6374  | -1.2016 | Down | 3.97E-23 | 1.95E-22 |
| Unigene4292   | Potri.009G048100.1 | 9.2988  | 21.3871  | -1.2016 | Down | 1.81E-11 | 5.60E-11 |
| Unigene49831  | Potri.006G218600.1 | 33.6593 | 77.4148  | -1.2016 | Down | 1.37E-72 | 2.00E-71 |
| Unigene34902  | Potri.010G003300.1 | 8.545   | 19.6542  | -1.2017 | Down | 1.24E-15 | 4.63E-15 |
| Unigene10919  | Potri.001G102900.8 | 8.1307  | 18.702   | -1.2017 | Down | 3.46E-46 | 3.12E-45 |

|               |                    |         |          |         |      |          |          |
|---------------|--------------------|---------|----------|---------|------|----------|----------|
| Unigene23682  | Potri.008G042100.2 | 8.055   | 18.529   | -1.2018 | Down | 5.94E-14 | 2.07E-13 |
| Unigene25580  | Potri.006G262100.1 | 13.1437 | 30.2346  | -1.2018 | Down | 8.95E-10 | 2.52E-09 |
| Unigene28117  | Potri.006G225200.5 | 3.8019  | 8.7455   | -1.2018 | Down | 1.54E-05 | 3.19E-05 |
| Unigene13873  | Potri.004G036100.2 | 48.4814 | 111.5204 | -1.2018 | Down | 3.53E-69 | 4.89E-68 |
| Unigene117230 | Potri.014G189900.6 | 20.4032 | 46.94    | -1.202  | Down | 4.89E-23 | 2.40E-22 |
| Unigene28968  | Potri.019G044200.1 | 4.6233  | 10.6373  | -1.2021 | Down | 9.52E-15 | 3.43E-14 |
| Unigene49846  | Potri.016G126200.1 | 8.8327  | 20.3219  | -1.2021 | Down | 1.18E-38 | 8.99E-38 |
| Unigene85654  | Potri.006G265300.1 | 19.8675 | 45.7089  | -1.2021 | Down | 6.73E-19 | 2.88E-18 |
| Unigene53744  | Potri.001G012200.2 | 8.2732  | 19.0351  | -1.2021 | Down | 4.51E-08 | 1.14E-07 |
| Unigene107277 | Potri.015G012200.3 | 26.1097 | 60.0769  | -1.2022 | Down | 3.20E-17 | 1.28E-16 |
| Unigene27462  | Potri.005G044900.2 | 10.3805 | 23.8837  | -1.2022 | Down | 4.51E-08 | 1.14E-07 |
| Unigene35906  | Potri.015G072800.1 | 24.365  | 56.0648  | -1.2023 | Down | 1.09E-19 | 4.78E-19 |
| Unigene45657  | Potri.004G190200.2 | 6.6893  | 15.3938  | -1.2024 | Down | 1.53E-15 | 5.70E-15 |
| Unigene11470  | Potri.009G016900.2 | 20.9301 | 48.1696  | -1.2025 | Down | 2.54E-30 | 1.55E-29 |
| Unigene41707  | Potri.001G148400.3 | 4.0127  | 9.2357   | -1.2026 | Down | 2.34E-06 | 5.22E-06 |
| Unigene51379  | Potri.010G106300.3 | 13.6481 | 31.413   | -1.2027 | Down | 2.84E-21 | 1.32E-20 |
| Unigene71500  | Potri.004G225800.5 | 32.3385 | 74.4317  | -1.2027 | Down | 2.84E-21 | 1.32E-20 |
| Unigene6271   | Potri.001G280600.1 | 7.3267  | 16.8634  | -1.2027 | Down | 2.34E-06 | 5.22E-06 |
| Unigene70612  | Potri.019G053800.2 | 62.8497 | 144.6667 | -1.2028 | Down | 2.94E-39 | 2.26E-38 |
| Unigene80386  | Potri.011G140100.4 | 78.2087 | 180.0232 | -1.2028 | Down | 1.23E-59 | 1.46E-58 |
| Unigene17928  | Potri.011G049300.1 | 31.4897 | 72.4836  | -1.2028 | Down | 6.73E-32 | 4.31E-31 |
| Unigene93422  | Potri.005G040600.1 | 10.4439 | 24.0412  | -1.2028 | Down | 1.34E-19 | 5.88E-19 |
| Unigene86421  | Potri.002G068800.2 | 11.7723 | 27.1017  | -1.203  | Down | 3.56E-12 | 1.14E-11 |
| Unigene6610   | Potri.012G004600.1 | 12.5004 | 28.7813  | -1.2032 | Down | 1.89E-15 | 7.01E-15 |
| Unigene33125  | Potri.018G125300.1 | 28.552  | 65.7439  | -1.2033 | Down | 3.25E-47 | 2.99E-46 |
| Unigene14203  | Potri.018G105900.2 | 5.3889  | 12.4085  | -1.2033 | Down | 3.60E-07 | 8.56E-07 |
| Unigene39818  | Potri.005G210800.1 | 4.0997  | 9.4401   | -1.2033 | Down | 3.60E-07 | 8.56E-07 |
| Unigene22545  | Potri.002G036400.1 | 19.933  | 45.8996  | -1.2033 | Down | 1.10E-27 | 6.27E-27 |
| Unigene11057  | Potri.018G145600.6 | 7.9604  | 18.3319  | -1.2034 | Down | 1.73E-58 | 2.00E-57 |
| Unigene11012  | Potri.016G142100.1 | 9.8495  | 22.6817  | -1.2034 | Down | 3.59E-34 | 2.44E-33 |
| Unigene17540  | Potri.014G095400.1 | 11.7845 | 27.1396  | -1.2035 | Down | 9.07E-14 | 3.13E-13 |
| Unigene9681   | Potri.010G111800.6 | 11.4204 | 26.301   | -1.2035 | Down | 9.07E-14 | 3.13E-13 |
| Unigene45106  | Potri.005G067200.1 | 5.1473  | 11.8546  | -1.2036 | Down | 4.87E-17 | 1.94E-16 |
| Unigene39357  | Potri.001G210500.3 | 20.0641 | 46.2094  | -1.2036 | Down | 9.55E-36 | 6.75E-35 |
| Unigene42949  | Potri.019G049800.2 | 8.4038  | 19.3567  | -1.2037 | Down | 4.93E-47 | 4.53E-46 |
| Unigene28040  | Potri.018G097700.2 | 13.8678 | 31.9421  | -1.2037 | Down | 4.32E-21 | 1.99E-20 |
| Unigene57796  | Potri.010G170900.1 | 4.0137  | 9.2448   | -1.2037 | Down | 5.58E-08 | 1.41E-07 |
| Unigene37976  | Potri.009G003900.2 | 9.8335  | 22.6498  | -1.2037 | Down | 5.58E-08 | 1.41E-07 |
| Unigene31106  | Potri.006G236600.1 | 20.2184 | 46.5698  | -1.2037 | Down | 4.32E-21 | 1.99E-20 |

|               |                    |          |          |         |      |           |           |
|---------------|--------------------|----------|----------|---------|------|-----------|-----------|
| Unigene33206  | Potri.006G074500.1 | 3.3776   | 7.7798   | -1.2037 | Down | 1.45E-14  | 5.19E-14  |
| Unigene46625  | Potri.003G074700.1 | 3.7044   | 8.5325   | -1.2037 | Down | 1.28E-04  | 2.42E-04  |
| Unigene79701  | Potri.001G111400.2 | 4.4331   | 10.211   | -1.2037 | Down | 1.28E-04  | 2.42E-04  |
| Unigene20469  | Potri.006G226700.2 | 21.7137  | 50.0162  | -1.2038 | Down | 4.15E-38  | 3.11E-37  |
| Unigene13357  | Potri.006G250100.2 | 4.0315   | 9.2871   | -1.2039 | Down | 2.33E-15  | 8.62E-15  |
| Unigene17870  | Potri.005G161800.2 | 11.2377  | 25.8885  | -1.204  | Down | 4.40E-12  | 1.40E-11  |
| Unigene6647   | Potri.014G122500.1 | 6.331    | 14.5867  | -1.2041 | Down | 3.30E-20  | 1.48E-19  |
| Unigene15034  | Potri.019G014200.2 | 11.5207  | 26.5444  | -1.2042 | Down | 7.02E-13  | 2.32E-12  |
| Unigene25795  | Potri.001G389200.1 | 37.7985  | 87.0903  | -1.2042 | Down | 1.45E-35  | 1.02E-34  |
| Unigene18014  | Potri.008G184000.1 | 2.0042   | 4.6183   | -1.2043 | Down | 1.91E-05  | 3.93E-05  |
| Unigene3344   | Potri.018G150600.2 | 4.1831   | 9.6394   | -1.2044 | Down | 1.91E-05  | 3.93E-05  |
| Unigene51636  | Potri.014G190300.1 | 16.062   | 37.0127  | -1.2044 | Down | 8.63E-22  | 4.07E-21  |
| Unigene51387  | Potri.004G211100.2 | 45.9508  | 105.8873 | -1.2044 | Down | 6.30E-38  | 4.71E-37  |
| Unigene116990 | Potri.001G080200.1 | 3.9494   | 9.1008   | -1.2044 | Down | 1.91E-05  | 3.93E-05  |
| Unigene15812  | Potri.008G188900.1 | 65.944   | 151.9711 | -1.2045 | Down | 3.17E-73  | 4.69E-72  |
| Unigene109644 | Potri.007G061500.5 | 45.9337  | 105.8582 | -1.2045 | Down | 1.92E-31  | 1.21E-30  |
| Unigene22534  | Potri.006G160400.1 | 15.9855  | 36.8406  | -1.2045 | Down | 2.74E-40  | 2.17E-39  |
| Unigene27239  | Potri.004G160800.3 | 21.3342  | 49.166   | -1.2045 | Down | 1.56E-18  | 6.58E-18  |
| Unigene13165  | Potri.010G095900.3 | 5.382    | 12.4042  | -1.2046 | Down | 2.52E-19  | 1.09E-18  |
| Unigene72184  | Potri.007G070700.1 | 42.9126  | 98.9024  | -1.2046 | Down | 3.37E-28  | 1.94E-27  |
| Unigene40235  | Potri.001G138900.2 | 6.3098   | 14.5424  | -1.2046 | Down | 2.16E-10  | 6.31E-10  |
| Unigene17827  | Potri.007G050100.1 | 35.2755  | 81.305   | -1.2047 | Down | 1.20E-42  | 9.99E-42  |
| Unigene33828  | Potri.007G031100.1 | 14.632   | 33.7246  | -1.2047 | Down | 5.47E-29  | 3.23E-28  |
| Unigene39056  | Potri.006G055000.3 | 13.7479  | 31.6868  | -1.2047 | Down | 2.88E-15  | 1.06E-14  |
| Unigene40104  | Potri.011G119400.1 | 2.2913   | 5.2815   | -1.2048 | Down | 2.90E-06  | 6.43E-06  |
| Unigene21818  | Potri.011G071700.1 | 7.2387   | 16.6855  | -1.2048 | Down | 2.20E-35  | 1.54E-34  |
| Unigene11944  | Potri.009G087500.1 | 2.4449   | 5.6357   | -1.2048 | Down | 2.90E-06  | 6.43E-06  |
| Unigene11730  | Potri.002G031800.1 | 1.5378   | 3.5446   | -1.2048 | Down | 2.90E-06  | 6.43E-06  |
| Unigene84427  | Potri.001G352600.1 | 107.7393 | 248.3388 | -1.2048 | Down | 1.88E-91  | 3.59E-90  |
| Unigene70045  | Potri.001G350700.1 | 3.5302   | 8.1373   | -1.2048 | Down | 4.62E-16  | 1.76E-15  |
| Unigene1681   | Potri.001G291900.1 | 2.3211   | 5.3503   | -1.2048 | Down | 2.90E-06  | 6.43E-06  |
| Unigene25030  | Potri.008G208000.1 | 13.8202  | 31.86    | -1.205  | Down | 5.45E-12  | 1.73E-11  |
| Unigene88411  | Potri.006G132200.1 | 52.869   | 121.8831 | -1.205  | Down | 1.57E-54  | 1.68E-53  |
| Unigene45463  | Potri.002G061200.2 | 13.8902  | 32.0226  | -1.205  | Down | 1.20E-17  | 4.87E-17  |
| Unigene12147  | Potri.T139400.1    | 1.7779   | 4.099    | -1.2051 | Down | 4.46E-07  | 1.06E-06  |
| Unigene7501   | Potri.009G087100.1 | 5.8176   | 13.4123  | -1.2051 | Down | 6.75E-29  | 3.97E-28  |
| Unigene4083   | Potri.001G366400.1 | 162.7366 | 375.2108 | -1.2052 | Down | 2.28E-133 | 7.02E-132 |
| Unigene23847  | Potri.001G236000.1 | 8.0384   | 18.5344  | -1.2052 | Down | 2.91E-31  | 1.83E-30  |
| Unigene22804  | Potri.001G018200.1 | 32.4412  | 74.7985  | -1.2052 | Down | 4.62E-48  | 4.33E-47  |



|               |                    |         |          |         |      |          |          |
|---------------|--------------------|---------|----------|---------|------|----------|----------|
| Unigene43334  | Potri.017G052900.1 | 8.9453  | 20.626   | -1.2053 | Down | 4.74E-32 | 3.05E-31 |
| Unigene15179  | Potri.003G109400.5 | 22.4071 | 51.6667  | -1.2053 | Down | 5.02E-20 | 2.24E-19 |
| Unigene33445  | Potri.018G060500.2 | 5.0025  | 11.5355  | -1.2054 | Down | 6.92E-08 | 1.74E-07 |
| Unigene13257  | Potri.009G026500.2 | 7.3178  | 16.8778  | -1.2056 | Down | 9.06E-25 | 4.71E-24 |
| Unigene35849  | Potri.015G079400.1 | 17.8937 | 41.2713  | -1.2057 | Down | 1.48E-17 | 5.99E-17 |
| Unigene45778  | Potri.014G191100.6 | 18.3908 | 42.4177  | -1.2057 | Down | 1.48E-17 | 5.99E-17 |
| Unigene33109  | Potri.016G016700.1 | 5.4382  | 12.545   | -1.2059 | Down | 4.24E-11 | 1.29E-10 |
| Unigene107772 | Potri.016G077200.2 | 67.6169 | 155.9899 | -1.206  | Down | 5.56E-43 | 4.67E-42 |
| Unigene10077  | Potri.015G010600.5 | 43.2842 | 99.8632  | -1.2061 | Down | 1.35E-36 | 9.78E-36 |
| Unigene28959  | Potri.005G101800.1 | 10.5141 | 24.2567  | -1.2061 | Down | 2.43E-45 | 2.15E-44 |
| Unigene25858  | Potri.003G163000.2 | 17.4945 | 40.363   | -1.2061 | Down | 1.71E-13 | 5.84E-13 |
| Unigene32439  | Potri.017G027000.2 | 6.9014  | 15.9237  | -1.2062 | Down | 1.57E-40 | 1.25E-39 |
| Unigene44623  | Potri.012G056000.2 | 23.4811 | 54.1773  | -1.2062 | Down | 4.79E-27 | 2.67E-26 |
| Unigene81611  | Potri.002G082300.2 | 17.5527 | 40.5004  | -1.2062 | Down | 4.39E-15 | 1.60E-14 |
| Unigene18075  | Potri.004G146900.2 | 8.7347  | 20.1562  | -1.2064 | Down | 2.94E-18 | 1.22E-17 |
| Unigene18010  | Potri.001G374100.5 | 10.7137 | 24.7239  | -1.2064 | Down | 7.65E-20 | 3.39E-19 |
| Unigene41528  | Potri.001G144500.1 | 18.0111 | 41.5614  | -1.2064 | Down | 1.82E-17 | 7.37E-17 |
| Unigene34554  | Potri.015G103300.1 | 5.5487  | 12.8047  | -1.2065 | Down | 7.65E-20 | 3.39E-19 |
| Unigene21447  | Potri.013G085000.1 | 12.0751 | 27.8704  | -1.2067 | Down | 2.91E-33 | 1.93E-32 |
| Unigene44560  | Potri.010G157400.1 | 19.1033 | 44.0938  | -1.2068 | Down | 1.46E-39 | 1.13E-38 |
| Unigene24120  | Potri.005G227200.1 | 9.6248  | 22.2157  | -1.2068 | Down | 1.46E-39 | 1.13E-38 |
| Unigene94626  | Potri.T089500.1    | 2.8432  | 6.5638   | -1.207  | Down | 3.60E-06 | 7.94E-06 |
| Unigene29357  | Potri.018G138200.1 | 21.2095 | 48.9652  | -1.207  | Down | 1.70E-24 | 8.76E-24 |
| Unigene38786  | Potri.018G021800.1 | 10.7972 | 24.9269  | -1.207  | Down | 3.31E-10 | 9.56E-10 |
| Unigene70309  | Potri.018G021100.2 | 1.8465  | 4.2629   | -1.207  | Down | 2.38E-05 | 4.85E-05 |
| Unigene21131  | Potri.013G061500.2 | 15.5512 | 35.9021  | -1.207  | Down | 1.40E-16 | 5.45E-16 |
| Unigene11930  | Potri.011G115100.2 | 3.0991  | 7.1546   | -1.207  | Down | 8.58E-08 | 2.13E-07 |
| Unigene41373  | Potri.010G114900.3 | 3.5645  | 8.2291   | -1.207  | Down | 1.59E-04 | 2.98E-04 |
| Unigene60952  | Potri.008G159700.2 | 10.6442 | 24.5737  | -1.207  | Down | 5.42E-15 | 1.98E-14 |
| Unigene17686  | Potri.006G270200.1 | 4.5465  | 10.4961  | -1.207  | Down | 5.54E-07 | 1.30E-06 |
| Unigene22510  | Potri.005G136000.1 | 3.422   | 7.9001   | -1.207  | Down | 2.10E-09 | 5.79E-09 |
| Unigene482    | Potri.005G095300.6 | 21.828  | 50.393   | -1.207  | Down | 3.99E-22 | 1.90E-21 |
| Unigene94511  | Potri.002G243900.1 | 7.1406  | 16.485   | -1.207  | Down | 5.55E-56 | 6.13E-55 |
| Unigene43658  | Potri.002G228600.1 | 11.1105 | 25.6501  | -1.207  | Down | 1.33E-12 | 4.33E-12 |
| Unigene17122  | Potri.002G205900.5 | 3.784   | 8.7359   | -1.207  | Down | 2.38E-05 | 4.85E-05 |
| Unigene21390  | Potri.002G195700.1 | 12.0364 | 27.7876  | -1.207  | Down | 8.32E-12 | 2.61E-11 |
| Unigene65964  | Potri.001G135200.1 | 9.2588  | 21.3751  | -1.207  | Down | 2.10E-09 | 5.79E-09 |
| Unigene53033  | Potri.001G082100.1 | 12.8619 | 29.6935  | -1.207  | Down | 2.10E-09 | 5.79E-09 |
| Unigene10451  | Potri.T019600.1    | 2.0518  | 4.737    | -1.2071 | Down | 1.59E-04 | 2.98E-04 |

|               |                    |         |          |         |      |           |           |
|---------------|--------------------|---------|----------|---------|------|-----------|-----------|
| Unigene7985   | Potri.019G129300.1 | 2.9075  | 6.7125   | -1.2071 | Down | 2.38E-05  | 4.85E-05  |
| Unigene68148  | Potri.016G113200.1 | 5.4153  | 12.5021  | -1.2071 | Down | 1.05E-23  | 5.27E-23  |
| Unigene40811  | Potri.007G078400.2 | 2.0599  | 4.7556   | -1.2071 | Down | 1.59E-04  | 2.98E-04  |
| Unigene24197  | Potri.002G044900.1 | 8.4665  | 19.5462  | -1.2071 | Down | 4.48E-26  | 2.42E-25  |
| Unigene22457  | Potri.008G080900.1 | 45.4289 | 104.8937 | -1.2072 | Down | 2.25E-108 | 5.31E-107 |
| Unigene27769  | Potri.016G054200.2 | 15.8621 | 36.632   | -1.2075 | Down | 2.10E-24  | 1.08E-23  |
| Unigene18226  | Potri.015G057600.1 | 14.098  | 32.5568  | -1.2075 | Down | 8.97E-27  | 4.96E-26  |
| Unigene12356  | Potri.008G069600.1 | 12.007  | 27.7284  | -1.2075 | Down | 5.52E-26  | 2.98E-25  |
| Unigene22277  | Potri.007G144300.1 | 4.2766  | 9.876    | -1.2075 | Down | 1.46E-27  | 8.25E-27  |
| Unigene24189  | Potri.002G013400.2 | 9.1048  | 21.0275  | -1.2076 | Down | 1.95E-42  | 1.62E-41  |
| Unigene20903  | Potri.018G047800.1 | 15.0576 | 34.7777  | -1.2077 | Down | 7.21E-19  | 3.08E-18  |
| Unigene1680   | Potri.003G134300.1 | 8.4651  | 19.5511  | -1.2077 | Down | 1.16E-19  | 5.12E-19  |
| Unigene41873  | Potri.011G164500.1 | 4.542   | 10.4912  | -1.2078 | Down | 1.73E-16  | 6.70E-16  |
| Unigene118053 | Potri.013G131100.3 | 19.8993 | 45.9687  | -1.2079 | Down | 6.81E-26  | 3.66E-25  |
| Unigene91506  | Potri.003G056700.1 | 35.3642 | 81.6973  | -1.208  | Down | 5.65E-47  | 5.18E-46  |
| Unigene32818  | Potri.008G091200.1 | 5.8911  | 13.61    | -1.2081 | Down | 9.84E-23  | 4.79E-22  |
| Unigene39301  | Potri.012G104500.5 | 12.7493 | 29.4578  | -1.2082 | Down | 5.86E-29  | 3.46E-28  |
| Unigene2409   | Potri.006G147400.1 | 6.895   | 15.9309  | -1.2082 | Down | 2.32E-20  | 1.05E-19  |
| Unigene30489  | Potri.001G236100.3 | 21.019  | 48.5626  | -1.2082 | Down | 3.75E-21  | 1.74E-20  |
| Unigene7037   | Potri.011G139900.1 | 4.1383  | 9.5623   | -1.2083 | Down | 4.10E-10  | 1.18E-09  |
| Unigene53759  | Potri.011G071400.1 | 10.4219 | 24.0816  | -1.2083 | Down | 4.10E-10  | 1.18E-09  |
| Unigene10485  | Potri.012G073300.1 | 8.0177  | 18.5278  | -1.2084 | Down | 2.60E-09  | 7.13E-09  |
| Unigene2943   | Potri.007G138700.1 | 6.4014  | 14.7949  | -1.2086 | Down | 7.50E-22  | 3.55E-21  |
| Unigene30975  | Potri.010G046800.1 | 20.8975 | 48.3008  | -1.2087 | Down | 4.63E-21  | 2.13E-20  |
| Unigene27934  | Potri.005G002200.2 | 17.5263 | 40.508   | -1.2087 | Down | 4.44E-28  | 2.55E-27  |
| Unigene35313  | Potri.002G007100.1 | 76.9384 | 177.823  | -1.2087 | Down | 1.99E-68  | 2.73E-67  |
| Unigene26215  | Potri.015G145800.1 | 61.2857 | 141.6558 | -1.2088 | Down | 1.68E-64  | 2.16E-63  |
| Unigene28791  | Potri.003G060500.1 | 3.785   | 8.7488   | -1.2088 | Down | 1.06E-07  | 2.63E-07  |
| Unigene81587  | Potri.001G211000.6 | 91.4205 | 211.3269 | -1.2089 | Down | 3.59E-72  | 5.22E-71  |
| Unigene108198 | Potri.019G095400.2 | 17.4671 | 40.3812  | -1.209  | Down | 2.02E-12  | 6.56E-12  |
| Unigene24182  | Potri.016G046900.1 | 26.7043 | 61.7338  | -1.209  | Down | 1.45E-29  | 8.70E-29  |
| Unigene36421  | Potri.007G049000.6 | 6.809   | 15.7409  | -1.209  | Down | 5.44E-35  | 3.77E-34  |
| Unigene35462  | Potri.004G043200.4 | 7.7843  | 17.996   | -1.209  | Down | 6.87E-07  | 1.60E-06  |
| Unigene34062  | Potri.003G222600.1 | 2.9207  | 6.7522   | -1.209  | Down | 6.87E-07  | 1.60E-06  |
| Unigene70347  | Potri.004G152100.2 | 4.6685  | 10.7929  | -1.2091 | Down | 2.02E-12  | 6.56E-12  |
| Unigene40215  | Potri.003G063300.1 | 3.0345  | 7.0154   | -1.2091 | Down | 6.87E-07  | 1.60E-06  |
| Unigene34795  | Potri.017G047600.3 | 4.8065  | 11.1138  | -1.2093 | Down | 5.71E-21  | 2.63E-20  |
| Unigene50273  | Potri.017G142400.1 | 12.3187 | 28.4857  | -1.2094 | Down | 4.11E-34  | 2.79E-33  |
| Unigene4456   | Potri.013G159700.1 | 6.4256  | 14.8584  | -1.2094 | Down | 4.48E-06  | 9.76E-06  |

|               |                    |         |          |         |      |          |          |
|---------------|--------------------|---------|----------|---------|------|----------|----------|
| Unigene53425  | Potri.001G394600.2 | 5.9738  | 13.8137  | -1.2094 | Down | 4.48E-06 | 9.76E-06 |
| Unigene3992   | Potri.004G043700.2 | 19.667  | 45.4823  | -1.2095 | Down | 1.02E-14 | 3.68E-14 |
| Unigene22685  | Potri.002G063400.1 | 7.159   | 16.5555  | -1.2095 | Down | 2.19E-19 | 9.52E-19 |
| Unigene27488  | Potri.008G120200.1 | 6.9279  | 16.0223  | -1.2096 | Down | 4.52E-44 | 3.88E-43 |
| Unigene21380  | Potri.006G225600.1 | 5.857   | 13.5453  | -1.2096 | Down | 9.51E-32 | 6.06E-31 |
| Unigene41395  | Potri.012G021500.1 | 14.0734 | 32.5511  | -1.2097 | Down | 8.41E-18 | 3.44E-17 |
| Unigene25774  | Potri.010G180600.1 | 29.5684 | 68.3879  | -1.2097 | Down | 2.56E-26 | 1.39E-25 |
| Unigene39541  | Potri.008G210200.1 | 6.7254  | 15.5548  | -1.2097 | Down | 8.27E-35 | 5.69E-34 |
| Unigene41850  | Potri.008G186100.2 | 9.4992  | 21.9704  | -1.2097 | Down | 6.37E-14 | 2.22E-13 |
| Unigene42655  | Potri.005G101900.1 | 1.8624  | 4.3075   | -1.2097 | Down | 6.37E-14 | 2.22E-13 |
| Unigene15845  | Potri.001G269400.1 | 28.2138 | 65.258   | -1.2098 | Down | 1.03E-41 | 8.44E-41 |
| Unigene10845  | Potri.013G000700.1 | 10.7133 | 24.7828  | -1.2099 | Down | 1.66E-35 | 1.17E-34 |
| Unigene103386 | Potri.010G173100.2 | 2.6448  | 6.1179   | -1.2099 | Down | 3.22E-09 | 8.77E-09 |
| Unigene25158  | Potri.009G162500.3 | 18.3131 | 42.3613  | -1.2099 | Down | 5.22E-17 | 2.07E-16 |
| Unigene32867  | Potri.003G197900.1 | 6.2014  | 14.3448  | -1.2099 | Down | 9.70E-25 | 5.04E-24 |
| Unigene100735 | Potri.001G321600.1 | 3.484   | 8.0591   | -1.2099 | Down | 2.96E-05 | 5.97E-05 |
| Unigene94876  | Potri.001G161900.3 | 6.039   | 13.9691  | -1.2099 | Down | 2.96E-05 | 5.97E-05 |
| Unigene22798  | Potri.012G142800.1 | 7.6755  | 17.7563  | -1.21   | Down | 1.02E-34 | 7.01E-34 |
| Unigene7338   | Potri.011G047600.1 | 31.7443 | 73.4354  | -1.21   | Down | 2.08E-42 | 1.73E-41 |
| Unigene1185   | Potri.010G170400.1 | 15.2421 | 35.2617  | -1.21   | Down | 6.43E-67 | 8.62E-66 |
| Unigene39461  | Potri.007G130800.2 | 4.7462  | 10.9796  | -1.21   | Down | 4.36E-20 | 1.95E-19 |
| Unigene28113  | Potri.005G139800.1 | 20.0654 | 46.4186  | -1.21   | Down | 4.36E-20 | 1.95E-19 |
| Unigene109254 | Potri.012G042700.1 | 43.9539 | 101.6893 | -1.2101 | Down | 4.42E-30 | 2.69E-29 |
| Unigene32266  | Potri.007G121700.1 | 6.4368  | 14.8915  | -1.2101 | Down | 3.69E-23 | 1.82E-22 |
| Unigene28508  | Potri.012G022000.1 | 54.559  | 126.2373 | -1.2102 | Down | 4.83E-66 | 6.38E-65 |
| Unigene41534  | Potri.010G051600.4 | 17.1073 | 39.5809  | -1.2102 | Down | 2.02E-15 | 7.50E-15 |
| Unigene45437  | Potri.015G063100.1 | 9.026   | 20.8869  | -1.2104 | Down | 5.82E-53 | 6.04E-52 |
| Unigene77006  | Potri.006G184600.2 | 31.9245 | 73.8776  | -1.2105 | Down | 7.38E-24 | 3.73E-23 |
| Unigene35430  | Potri.001G322300.1 | 32.3483 | 74.8583  | -1.2105 | Down | 7.38E-24 | 3.73E-23 |
| Unigene4417   | Potri.016G030200.1 | 9.9712  | 23.0767  | -1.2106 | Down | 1.32E-07 | 3.24E-07 |
| Unigene17844  | Potri.012G052200.1 | 2.7441  | 6.3508   | -1.2106 | Down | 1.99E-04 | 3.70E-04 |
| Unigene12225  | Potri.011G110700.2 | 21.7917 | 50.4334  | -1.2106 | Down | 1.70E-44 | 1.48E-43 |
| Unigene19390  | Potri.008G175500.2 | 8.6076  | 19.9209  | -1.2106 | Down | 7.87E-14 | 2.73E-13 |
| Unigene29337  | Potri.006G275700.2 | 4.069   | 9.4171   | -1.2106 | Down | 1.32E-07 | 3.24E-07 |
| Unigene69317  | Potri.004G203000.1 | 1.9555  | 4.5257   | -1.2106 | Down | 1.32E-07 | 3.24E-07 |
| Unigene37095  | Potri.001G049400.3 | 4.6624  | 10.7905  | -1.2106 | Down | 1.99E-04 | 3.70E-04 |
| Unigene2425   | Potri.004G124500.2 | 8.3835  | 19.4037  | -1.2107 | Down | 2.06E-28 | 1.19E-27 |
| Unigene31794  | Potri.006G194500.2 | 7.0764  | 16.379   | -1.2108 | Down | 7.17E-72 | 1.04E-70 |
| Unigene73992  | Potri.003G041100.1 | 49.326  | 114.1711 | -1.2108 | Down | 9.49E-34 | 6.37E-33 |

|              |                    |         |          |         |      |           |           |
|--------------|--------------------|---------|----------|---------|------|-----------|-----------|
| Unigene38272 | Potri.001G222500.1 | 17.789  | 41.1744  | -1.2108 | Down | 3.33E-19  | 1.44E-18  |
| Unigene20133 | Potri.001G195300.1 | 9.8643  | 22.8325  | -1.2108 | Down | 4.01E-16  | 1.53E-15  |
| Unigene27486 | Potri.019G054600.3 | 21.9934 | 50.9119  | -1.2109 | Down | 2.06E-18  | 8.67E-18  |
| Unigene39480 | Potri.012G022100.1 | 4.7304  | 10.9502  | -1.2109 | Down | 2.06E-18  | 8.66E-18  |
| Unigene30143 | Potri.002G003700.1 | 9.3883  | 21.7328  | -1.2109 | Down | 6.27E-10  | 1.78E-09  |
| Unigene17903 | Potri.001G213800.2 | 9.0996  | 21.0633  | -1.2109 | Down | 4.93E-13  | 1.65E-12  |
| Unigene27904 | Potri.013G031100.2 | 8.191   | 18.9622  | -1.211  | Down | 2.50E-15  | 9.22E-15  |
| Unigene11380 | Potri.010G075000.3 | 48.5657 | 112.4315 | -1.211  | Down | 4.33E-124 | 1.21E-122 |
| Unigene2561  | Potri.019G098500.1 | 5.8828  | 13.6198  | -1.2111 | Down | 1.28E-17  | 5.21E-17  |
| Unigene45516 | Potri.018G046400.2 | 3.7579  | 8.7003   | -1.2111 | Down | 3.09E-12  | 9.93E-12  |
| Unigene22706 | Potri.018G036500.2 | 1.9944  | 4.6174   | -1.2111 | Down | 8.52E-07  | 1.97E-06  |
| Unigene39696 | Potri.009G109900.1 | 2.9073  | 6.7309   | -1.2111 | Down | 1.28E-17  | 5.21E-17  |
| Unigene2241  | Potri.013G023400.1 | 8.1536  | 18.8798  | -1.2113 | Down | 7.96E-17  | 3.14E-16  |
| Unigene13702 | Potri.012G069700.1 | 25.9534 | 60.0948  | -1.2113 | Down | 5.20E-45  | 4.56E-44  |
| Unigene16060 | Potri.005G260400.1 | 18.4076 | 42.6207  | -1.2113 | Down | 1.56E-14  | 5.56E-14  |
| Unigene19555 | Potri.013G094400.2 | 5.0863  | 11.7784  | -1.2115 | Down | 1.94E-11  | 6.00E-11  |
| Unigene10335 | Potri.011G126800.1 | 17.8172 | 41.2616  | -1.2115 | Down | 9.73E-14  | 3.35E-13  |
| Unigene41777 | Potri.007G098200.1 | 9.8788  | 22.8777  | -1.2115 | Down | 9.73E-14  | 3.35E-13  |
| Unigene39538 | Potri.006G078700.1 | 6.4045  | 14.8316  | -1.2115 | Down | 7.71E-36  | 5.47E-35  |
| Unigene47921 | Potri.001G311600.1 | 43.6555 | 101.0937 | -1.2115 | Down | 2.70E-31  | 1.70E-30  |
| Unigene12838 | Potri.013G020400.3 | 7.5551  | 17.4969  | -1.2116 | Down | 4.95E-16  | 1.89E-15  |
| Unigene39569 | Potri.009G105900.2 | 4.7472  | 10.9944  | -1.2116 | Down | 2.55E-18  | 1.07E-17  |
| Unigene54297 | Potri.002G165500.2 | 12.0242 | 27.8476  | -1.2116 | Down | 2.55E-18  | 1.07E-17  |
| Unigene61129 | Potri.019G051300.1 | 3.7207  | 8.6183   | -1.2118 | Down | 5.56E-06  | 1.20E-05  |
| Unigene3987  | Potri.016G136600.1 | 10.9169 | 25.2873  | -1.2118 | Down | 2.54E-08  | 6.56E-08  |
| Unigene21903 | Potri.014G091800.1 | 28.4541 | 65.9091  | -1.2118 | Down | 6.71E-54  | 7.09E-53  |
| Unigene47983 | Potri.009G073300.2 | 6.065   | 14.0485  | -1.2118 | Down | 5.56E-06  | 1.20E-05  |
| Unigene88820 | Potri.001G266400.1 | 10.9383 | 25.3367  | -1.2118 | Down | 6.09E-13  | 2.02E-12  |
| Unigene69826 | Potri.017G017700.1 | 6.0376  | 13.986   | -1.2119 | Down | 7.58E-51  | 7.53E-50  |
| Unigene22062 | Potri.004G066600.1 | 5.2076  | 12.0626  | -1.2119 | Down | 8.19E-20  | 3.62E-19  |
| Unigene27542 | Potri.018G000800.1 | 10.5326 | 24.4012  | -1.2121 | Down | 9.82E-17  | 3.86E-16  |
| Unigene5322  | Potri.014G119100.1 | 9.3872  | 21.7483  | -1.2121 | Down | 1.92E-14  | 6.84E-14  |
| Unigene4592  | Potri.009G120200.1 | 15.786  | 36.5731  | -1.2121 | Down | 1.92E-14  | 6.84E-14  |
| Unigene41916 | Potri.001G174000.1 | 24.0869 | 55.8058  | -1.2122 | Down | 4.49E-25  | 2.35E-24  |
| Unigene20116 | Potri.T145100.1    | 6.1585  | 14.2714  | -1.2125 | Down | 1.63E-07  | 3.99E-07  |
| Unigene7961  | Potri.010G157400.2 | 20.4858 | 47.4727  | -1.2125 | Down | 7.03E-50  | 6.84E-49  |
| Unigene8145  | Potri.002G027100.1 | 3.0889  | 7.158    | -1.2125 | Down | 1.63E-07  | 3.99E-07  |
| Unigene21780 | Potri.010G220000.4 | 33.0406 | 76.5708  | -1.2126 | Down | 3.17E-252 | 2.20E-250 |
| Unigene46974 | Potri.007G002800.3 | 12.1506 | 28.1601  | -1.2126 | Down | 2.40E-11  | 7.39E-11  |

|               |                    |          |          |         |      |           |           |
|---------------|--------------------|----------|----------|---------|------|-----------|-----------|
| Unigene67110  | Potri.005G234000.1 | 257.8364 | 597.5793 | -1.2127 | Down | 8.33E-226 | 5.01E-224 |
| Unigene19924  | Potri.005G003000.1 | 3.1005   | 7.1868   | -1.2128 | Down | 3.68E-05  | 7.37E-05  |
| Unigene17206  | Potri.015G108600.5 | 6.1238   | 14.1948  | -1.2129 | Down | 4.93E-09  | 1.33E-08  |
| Unigene36578  | Potri.001G358800.1 | 7.9755   | 18.4869  | -1.2129 | Down | 7.52E-13  | 2.49E-12  |
| Unigene4201   | Potri.018G047400.5 | 4.6305   | 10.7344  | -1.213  | Down | 3.88E-18  | 1.61E-17  |
| Unigene31588  | Potri.018G055700.1 | 8.14     | 18.8715  | -1.2131 | Down | 1.52E-10  | 4.46E-10  |
| Unigene46136  | Potri.006G190900.2 | 6.3919   | 14.8188  | -1.2131 | Down | 1.52E-10  | 4.46E-10  |
| Unigene64403  | Potri.007G096700.2 | 321.338  | 745.0236 | -1.2132 | Down | 2.50E-235 | 1.58E-233 |
| Unigene673    | Potri.002G254300.1 | 14.0909  | 32.6691  | -1.2132 | Down | 6.83E-25  | 3.56E-24  |
| Unigene34202  | Potri.001G277800.2 | 10.2549  | 23.7753  | -1.2132 | Down | 6.83E-25  | 3.56E-24  |
| Unigene7579   | Potri.016G110600.1 | 3.2191   | 7.464    | -1.2133 | Down | 1.06E-06  | 2.43E-06  |
| Unigene44594  | Potri.001G255000.1 | 2.7365   | 6.345    | -1.2133 | Down | 1.06E-06  | 2.43E-06  |
| Unigene51579  | Potri.001G001300.1 | 14.2586  | 33.061   | -1.2133 | Down | 2.41E-17  | 9.69E-17  |
| Unigene46711  | Potri.017G086500.1 | 50.6754  | 117.5088 | -1.2134 | Down | 3.98E-77  | 6.26E-76  |
| Unigene46719  | Potri.010G152300.3 | 24.9085  | 57.7577  | -1.2134 | Down | 4.21E-24  | 2.14E-23  |
| Unigene22465  | Potri.018G086800.3 | 11.2241  | 26.0282  | -1.2135 | Down | 2.48E-20  | 1.12E-19  |
| Unigene60579  | Potri.001G140000.1 | 3.3857   | 7.8516   | -1.2135 | Down | 3.15E-08  | 8.09E-08  |
| Unigene3594   | Potri.001G129600.2 | 22.5724  | 52.3446  | -1.2135 | Down | 2.48E-20  | 1.12E-19  |
| Unigene89568  | Potri.005G005000.1 | 6.1471   | 14.2556  | -1.2136 | Down | 3.15E-08  | 8.09E-08  |
| Unigene50649  | Potri.008G032600.8 | 5.3391   | 12.3831  | -1.2137 | Down | 9.60E-10  | 2.70E-09  |
| Unigene1825   | Potri.006G155500.1 | 21.7162  | 50.3669  | -1.2137 | Down | 2.74E-26  | 1.49E-25  |
| Unigene24518  | Potri.001G353900.2 | 8.7407   | 20.2724  | -1.2137 | Down | 1.65E-34  | 1.13E-33  |
| Unigene11573  | Potri.012G056200.1 | 16.2217  | 37.6249  | -1.2138 | Down | 1.78E-37  | 1.31E-36  |
| Unigene105053 | Potri.003G151500.2 | 2.8308   | 6.566    | -1.2138 | Down | 2.97E-11  | 9.08E-11  |
| Unigene10607  | Potri.007G092200.1 | 5.3165   | 12.3321  | -1.2139 | Down | 6.85E-45  | 5.99E-44  |
| Unigene13409  | Potri.001G279700.1 | 7.3554   | 17.0614  | -1.2139 | Down | 1.60E-22  | 7.74E-22  |
| Unigene31487  | Potri.008G086400.2 | 24.6267  | 57.1308  | -1.214  | Down | 6.22E-33  | 4.10E-32  |
| Unigene1902   | Potri.006G208300.2 | 9.3626   | 21.7195  | -1.214  | Down | 9.31E-16  | 3.50E-15  |
| Unigene12773  | Potri.005G204400.1 | 9.6968   | 22.4966  | -1.2141 | Down | 9.89E-22  | 4.66E-21  |
| Unigene94583  | Potri.005G024700.1 | 23.8082  | 55.2333  | -1.2141 | Down | 9.53E-19  | 4.05E-18  |
| Unigene2369   | Potri.001G377200.1 | 22.7407  | 52.7593  | -1.2141 | Down | 3.20E-23  | 1.58E-22  |
| Unigene34996  | Potri.018G064400.1 | 3.4188   | 7.9332   | -1.2144 | Down | 1.88E-10  | 5.49E-10  |
| Unigene89315  | Potri.011G056600.2 | 2.7473   | 6.375    | -1.2144 | Down | 2.48E-04  | 4.56E-04  |
| Unigene46556  | Potri.010G089600.4 | 11.0203  | 25.5724  | -1.2144 | Down | 6.11E-09  | 1.63E-08  |
| Unigene14210  | Potri.007G023600.1 | 3.7204   | 8.6331   | -1.2144 | Down | 6.91E-06  | 1.49E-05  |
| Unigene65823  | Potri.006G265700.1 | 13.1052  | 30.4104  | -1.2144 | Down | 1.88E-10  | 5.49E-10  |
| Unigene99710  | Potri.005G188200.2 | 1.4206   | 3.2964   | -1.2144 | Down | 6.91E-06  | 1.49E-05  |
| Unigene19932  | Potri.004G146900.1 | 4.0577   | 9.4158   | -1.2144 | Down | 2.48E-04  | 4.56E-04  |
| Unigene48557  | Potri.003G115500.3 | 7.096    | 16.4661  | -1.2144 | Down | 6.91E-06  | 1.49E-05  |

|               |                    |          |          |         |      |          |          |
|---------------|--------------------|----------|----------|---------|------|----------|----------|
| Unigene28229  | Potri.003G094300.1 | 12.6936  | 29.4551  | -1.2144 | Down | 1.85E-16 | 7.17E-16 |
| Unigene4037   | Potri.002G252800.7 | 9.0073   | 20.9013  | -1.2144 | Down | 1.88E-10 | 5.49E-10 |
| Unigene48538  | Potri.002G013500.1 | 16.0961  | 37.3506  | -1.2144 | Down | 1.83E-13 | 6.24E-13 |
| Unigene27472  | Potri.001G300900.1 | 4.8248   | 11.1959  | -1.2144 | Down | 2.03E-07 | 4.91E-07 |
| Unigene18183  | Potri.001G008500.1 | 2.9703   | 6.8924   | -1.2144 | Down | 2.03E-07 | 4.91E-07 |
| Unigene102781 | Potri.014G154900.4 | 2.621    | 6.0821   | -1.2145 | Down | 2.03E-07 | 4.91E-07 |
| Unigene13496  | Potri.014G135600.1 | 5.3007   | 12.3033  | -1.2148 | Down | 3.67E-17 | 1.46E-16 |
| Unigene51325  | Potri.001G311700.1 | 19.358   | 44.9328  | -1.2148 | Down | 1.15E-15 | 4.31E-15 |
| Unigene24419  | Potri.015G032500.3 | 9.3889   | 21.7938  | -1.2149 | Down | 3.62E-14 | 1.27E-13 |
| Unigene22630  | Potri.012G143100.1 | 12.3956  | 28.7731  | -1.2149 | Down | 8.33E-27 | 4.61E-26 |
| Unigene54056  | Potri.005G171800.1 | 5.384    | 12.4981  | -1.215  | Down | 1.15E-12 | 3.76E-12 |
| Unigene8773   | Potri.001G253500.2 | 48.0493  | 111.5392 | -1.215  | Down | 1.06E-77 | 1.68E-76 |
| Unigene51530  | Potri.016G109000.2 | 9.9559   | 23.114   | -1.2151 | Down | 1.19E-09 | 3.32E-09 |
| Unigene53124  | Potri.010G241800.1 | 11.6664  | 27.0852  | -1.2151 | Down | 1.19E-09 | 3.32E-09 |
| Unigene36878  | Potri.005G073600.2 | 5.0157   | 11.6446  | -1.2151 | Down | 1.19E-09 | 3.32E-09 |
| Unigene92225  | Potri.004G099800.2 | 20.8296  | 48.3614  | -1.2152 | Down | 3.56E-31 | 2.23E-30 |
| Unigene29480  | Potri.012G112400.1 | 3.5006   | 8.1281   | -1.2153 | Down | 3.90E-08 | 9.96E-08 |
| Unigene34415  | Potri.006G184500.1 | 8.2572   | 19.1723  | -1.2153 | Down | 7.16E-15 | 2.60E-14 |
| Unigene51640  | Potri.017G106800.3 | 12.849   | 29.8365  | -1.2154 | Down | 2.26E-13 | 7.68E-13 |
| Unigene39820  | Potri.006G257400.1 | 13.3167  | 30.9224  | -1.2154 | Down | 3.16E-25 | 1.66E-24 |
| Unigene31545  | Potri.010G213700.1 | 6.9359   | 16.1073  | -1.2156 | Down | 1.31E-06 | 2.99E-06 |
| Unigene2011   | Potri.010G188700.1 | 12.3837  | 28.7608  | -1.2157 | Down | 9.30E-21 | 4.24E-20 |
| Unigene1460   | Potri.006G122100.1 | 23.9818  | 55.6981  | -1.2157 | Down | 1.69E-57 | 1.91E-56 |
| Unigene14861  | Potri.001G465900.2 | 37.7384  | 87.651   | -1.2157 | Down | 7.02E-51 | 6.98E-50 |
| Unigene21744  | Potri.001G089900.1 | 18.5545  | 43.0947  | -1.2157 | Down | 1.83E-68 | 2.51E-67 |
| Unigene5358   | Potri.011G041400.1 | 5.1957   | 12.0684  | -1.2158 | Down | 1.27E-26 | 6.96E-26 |
| Unigene435    | Potri.019G031700.1 | 8.2517   | 19.1676  | -1.2159 | Down | 2.72E-41 | 2.20E-40 |
| Unigene16042  | Potri.013G124900.3 | 3.7126   | 8.6245   | -1.216  | Down | 7.56E-09 | 2.01E-08 |
| Unigene119067 | Potri.010G170900.1 | 2.1088   | 4.8989   | -1.216  | Down | 4.58E-05 | 9.10E-05 |
| Unigene76022  | Potri.010G099200.1 | 31.971   | 74.2709  | -1.216  | Down | 1.20E-23 | 6.01E-23 |
| Unigene49957  | Potri.008G160600.1 | 4.4371   | 10.3077  | -1.216  | Down | 7.56E-09 | 2.01E-08 |
| Unigene20074  | Potri.007G093200.6 | 1.8251   | 4.2397   | -1.216  | Down | 4.58E-05 | 9.10E-05 |
| Unigene49231  | Potri.002G160900.4 | 2.2866   | 5.3118   | -1.216  | Down | 4.58E-05 | 9.10E-05 |
| Unigene21384  | Potri.001G157300.8 | 8.7948   | 20.431   | -1.216  | Down | 1.51E-78 | 2.42E-77 |
| Unigene111157 | Potri.008G043700.3 | 42.4891  | 98.7158  | -1.2162 | Down | 1.09E-31 | 6.91E-31 |
| Unigene78046  | Potri.006G120000.1 | 109.0295 | 253.3042 | -1.2162 | Down | 6.16E-80 | 1.01E-78 |
| Unigene12623  | Potri.004G038400.1 | 5.8519   | 13.5961  | -1.2162 | Down | 8.84E-15 | 3.19E-14 |
| Unigene47472  | Potri.002G066000.3 | 14.8127  | 34.417   | -1.2163 | Down | 4.54E-11 | 1.38E-10 |
| Unigene37669  | Potri.014G156000.1 | 10.9641  | 25.4777  | -1.2164 | Down | 2.80E-13 | 9.45E-13 |

|               |                    |         |          |         |      |          |          |
|---------------|--------------------|---------|----------|---------|------|----------|----------|
| Unigene33129  | Potri.009G058000.1 | 2.3199  | 5.3907   | -1.2164 | Down | 2.51E-07 | 6.05E-07 |
| Unigene93340  | Potri.005G109100.1 | 54.9224 | 127.6219 | -1.2164 | Down | 1.56E-96 | 3.18E-95 |
| Unigene45182  | Potri.004G000600.1 | 12.3843 | 28.777   | -1.2164 | Down | 2.05E-40 | 1.62E-39 |
| Unigene17296  | Potri.006G226000.1 | 3.549   | 8.247    | -1.2165 | Down | 2.51E-07 | 6.05E-07 |
| Unigene42586  | Potri.002G092700.1 | 4.8162  | 11.1918  | -1.2165 | Down | 6.24E-39 | 4.77E-38 |
| Unigene25083  | Potri.001G015400.2 | 30.9212 | 71.8553  | -1.2165 | Down | 3.12E-27 | 1.75E-26 |
| Unigene32061  | Potri.015G122800.2 | 14.8515 | 34.5145  | -1.2166 | Down | 1.73E-61 | 2.11E-60 |
| Unigene30390  | Potri.014G137300.1 | 21.1889 | 49.241   | -1.2166 | Down | 1.75E-15 | 6.51E-15 |
| Unigene54152  | Potri.013G134200.2 | 6.9756  | 16.2107  | -1.2166 | Down | 1.75E-15 | 6.51E-15 |
| Unigene32559  | Potri.011G057700.1 | 12.399  | 28.8141  | -1.2166 | Down | 2.04E-29 | 1.22E-28 |
| Unigene29430  | Potri.010G232200.1 | 4.3808  | 10.1812  | -1.2166 | Down | 1.47E-09 | 4.09E-09 |
| Unigene8349   | Potri.010G216900.1 | 5.2443  | 12.1889  | -1.2167 | Down | 8.91E-12 | 2.80E-11 |
| Unigene16164  | Potri.005G036400.1 | 5.7633  | 13.3951  | -1.2167 | Down | 8.91E-12 | 2.80E-11 |
| Unigene75285  | Potri.013G072100.1 | 43.064  | 100.0977 | -1.2169 | Down | 8.22E-31 | 5.10E-30 |
| Unigene37738  | Potri.010G072900.3 | 24.9167 | 57.9188  | -1.2169 | Down | 1.41E-20 | 6.42E-20 |
| Unigene22958  | Potri.003G071300.1 | 43.1701 | 100.3473 | -1.2169 | Down | 8.62E-71 | 1.23E-69 |
| Unigene39749  | Potri.016G139000.8 | 23.6441 | 54.9652  | -1.217  | Down | 1.37E-44 | 1.19E-43 |
| Unigene13278  | Potri.009G080400.1 | 7.5266  | 17.4961  | -1.217  | Down | 5.91E-25 | 3.09E-24 |
| Unigene82920  | Potri.001G004600.1 | 57.1457 | 132.8386 | -1.217  | Down | 2.99E-48 | 2.82E-47 |
| Unigene67498  | Potri.010G064300.1 | 3.0846  | 7.1712   | -1.2171 | Down | 2.87E-10 | 8.32E-10 |
| Unigene4061   | Potri.009G020800.1 | 10.4219 | 24.2293  | -1.2171 | Down | 4.84E-08 | 1.22E-07 |
| Unigene42691  | Potri.007G048000.3 | 9.1013  | 21.1592  | -1.2171 | Down | 2.18E-34 | 1.48E-33 |
| Unigene49225  | Potri.006G255200.1 | 2.2009  | 5.1167   | -1.2171 | Down | 8.59E-06 | 1.82E-05 |
| Unigene32656  | Potri.005G053700.1 | 4.0464  | 9.4071   | -1.2171 | Down | 6.89E-17 | 2.72E-16 |
| Unigene24931  | Potri.003G056400.1 | 6.8143  | 15.8422  | -1.2171 | Down | 8.59E-06 | 1.82E-05 |
| Unigene37795  | Potri.001G357600.1 | 7.8743  | 18.3066  | -1.2171 | Down | 4.84E-08 | 1.22E-07 |
| Unigene119122 | Potri.001G275600.1 | 2.4229  | 5.6328   | -1.2171 | Down | 8.59E-06 | 1.82E-05 |
| Unigene104982 | Potri.011G118800.3 | 2.998   | 6.9712   | -1.2174 | Down | 2.16E-15 | 8.01E-15 |
| Unigene34904  | Potri.006G254400.1 | 15.3392 | 35.6673  | -1.2174 | Down | 1.34E-33 | 8.93E-33 |
| Unigene25387  | Potri.010G002400.2 | 29.6775 | 69.0137  | -1.2175 | Down | 1.13E-22 | 5.46E-22 |
| Unigene44360  | Potri.006G105800.1 | 9.9357  | 23.105   | -1.2175 | Down | 1.13E-22 | 5.46E-22 |
| Unigene53845  | Potri.002G137700.1 | 11.4855 | 26.7085  | -1.2175 | Down | 3.46E-13 | 1.16E-12 |
| Unigene108561 | Potri.009G117500.1 | 14.7046 | 34.1961  | -1.2176 | Down | 5.61E-11 | 1.69E-10 |
| Unigene33009  | Potri.010G099400.2 | 9.7102  | 22.5834  | -1.2177 | Down | 2.25E-23 | 1.12E-22 |
| Unigene24143  | Potri.009G150100.1 | 5.939   | 13.8122  | -1.2177 | Down | 8.19E-33 | 5.38E-32 |
| Unigene29416  | Potri.001G095800.1 | 4.6997  | 10.9304  | -1.2177 | Down | 9.36E-09 | 2.48E-08 |
| Unigene53057  | Potri.004G118900.1 | 38.1919 | 88.8305  | -1.2178 | Down | 2.92E-26 | 1.59E-25 |
| Unigene52312  | Potri.017G071600.1 | 3.4771  | 8.0881   | -1.2179 | Down | 1.63E-06 | 3.69E-06 |
| Unigene110169 | Potri.010G065600.2 | 22.2785 | 51.8226  | -1.2179 | Down | 8.51E-17 | 3.35E-16 |

|              |                     |          |          |         |      |          |          |
|--------------|---------------------|----------|----------|---------|------|----------|----------|
| Unigene11161 | Potri.010G022700.1  | 3.8952   | 9.0607   | -1.2179 | Down | 8.51E-17 | 3.35E-16 |
| Unigene18921 | Potri.018G098200.1  | 8.9133   | 20.7348  | -1.218  | Down | 1.08E-19 | 4.75E-19 |
| Unigene12221 | Potri.018G020400.1  | 86.3186  | 200.8046 | -1.218  | Down | 1.25E-89 | 2.34E-88 |
| Unigene40808 | Potri.001G289400.10 | 34.5494  | 80.3704  | -1.218  | Down | 8.99E-25 | 4.67E-24 |
| Unigene39939 | Potri.014G111000.1  | 23.2281  | 54.0397  | -1.2181 | Down | 2.36E-41 | 1.91E-40 |
| Unigene79964 | Potri.010G197800.2  | 10.5048  | 24.4392  | -1.2181 | Down | 1.82E-09 | 5.03E-09 |
| Unigene22142 | Potri.001G057400.3  | 25.1448  | 58.5003  | -1.2182 | Down | 7.47E-71 | 1.06E-69 |
| Unigene26019 | Potri.014G159500.2  | 46.7488  | 108.768  | -1.2183 | Down | 6.34E-45 | 5.55E-44 |
| Unigene17769 | Potri.004G197400.1  | 21.8114  | 50.7482  | -1.2183 | Down | 5.39E-37 | 3.94E-36 |
| Unigene38202 | Potri.010G004100.2  | 16.4485  | 38.2748  | -1.2184 | Down | 1.24E-32 | 8.12E-32 |
| Unigene9501  | Potri.005G080200.2  | 15.5235  | 36.1202  | -1.2184 | Down | 3.36E-18 | 1.40E-17 |
| Unigene22604 | Potri.001G348700.1  | 16.5885  | 38.5989  | -1.2184 | Down | 4.29E-21 | 1.98E-20 |
| Unigene28595 | Potri.012G137700.1  | 10.5281  | 24.5     | -1.2185 | Down | 8.57E-22 | 4.04E-21 |
| Unigene30838 | Potri.008G175500.2  | 1.6832   | 3.917    | -1.2185 | Down | 3.10E-04 | 5.62E-04 |
| Unigene27026 | Potri.006G275300.2  | 8.0042   | 18.6266  | -1.2185 | Down | 3.11E-07 | 7.45E-07 |
| Unigene44774 | Potri.006G263300.1  | 9.0606   | 21.085   | -1.2185 | Down | 3.31E-36 | 2.37E-35 |
| Unigene92441 | Potri.004G167600.1  | 1.9549   | 4.5493   | -1.2185 | Down | 3.10E-04 | 5.62E-04 |
| Unigene16744 | Potri.003G194600.7  | 20.2715  | 47.1739  | -1.2185 | Down | 5.29E-16 | 2.01E-15 |
| Unigene6428  | Potri.007G045700.1  | 2.1387   | 4.9771   | -1.2186 | Down | 3.10E-04 | 5.62E-04 |
| Unigene31840 | Potri.011G053200.1  | 8.9539   | 20.8387  | -1.2187 | Down | 2.37E-43 | 2.01E-42 |
| Unigene28230 | Potri.014G035500.1  | 11.6287  | 27.0659  | -1.2188 | Down | 8.42E-14 | 2.91E-13 |
| Unigene40162 | Potri.005G191300.1  | 9.2594   | 21.5513  | -1.2188 | Down | 8.42E-14 | 2.91E-13 |
| Unigene29938 | Potri.004G075200.2  | 50.0984  | 116.6159 | -1.2189 | Down | 9.39E-65 | 1.21E-63 |
| Unigene26870 | Potri.001G233000.2  | 67.7342  | 157.6591 | -1.2189 | Down | 8.50E-70 | 1.19E-68 |
| Unigene82921 | Potri.003G220300.1  | 74.4583  | 173.3271 | -1.219  | Down | 1.40E-62 | 1.75E-61 |
| Unigene48287 | Potri.002G234600.2  | 9.8527   | 22.9359  | -1.219  | Down | 5.99E-08 | 1.51E-07 |
| Unigene21945 | Potri.001G358900.3  | 7.278    | 16.9422  | -1.219  | Down | 5.29E-21 | 2.44E-20 |
| Unigene22322 | Potri.005G182300.1  | 8.5143   | 19.8228  | -1.2192 | Down | 6.66E-39 | 5.09E-38 |
| Unigene48239 | Potri.003G221100.1  | 39.8167  | 92.6972  | -1.2192 | Down | 8.87E-42 | 7.25E-41 |
| Unigene42957 | Potri.002G129300.1  | 7.3686   | 17.1566  | -1.2193 | Down | 1.43E-29 | 8.61E-29 |
| Unigene9655  | Potri.017G092600.1  | 2.5752   | 5.9965   | -1.2194 | Down | 5.71E-05 | 1.12E-04 |
| Unigene8167  | Potri.006G255400.4  | 7.0829   | 16.4925  | -1.2194 | Down | 6.53E-16 | 2.47E-15 |
| Unigene7120  | Potri.004G196300.1  | 1.8442   | 4.2941   | -1.2194 | Down | 5.71E-05 | 1.12E-04 |
| Unigene86036 | Potri.003G096700.2  | 105.7449 | 246.2528 | -1.2196 | Down | 1.27E-98 | 2.68E-97 |
| Unigene27368 | Potri.019G042100.2  | 11.1734  | 26.023   | -1.2197 | Down | 2.25E-09 | 6.20E-09 |
| Unigene39936 | Potri.007G126300.1  | 7.1246   | 16.5933  | -1.2197 | Down | 2.25E-09 | 6.20E-09 |
| Unigene72409 | Potri.006G272300.1  | 12.253   | 28.5373  | -1.2197 | Down | 2.25E-09 | 6.20E-09 |
| Unigene45425 | Potri.001G347300.1  | 2.9945   | 6.9743   | -1.2197 | Down | 2.25E-09 | 6.20E-09 |
| Unigene35441 | Potri.010G216000.1  | 7.5316   | 17.5424  | -1.2198 | Down | 1.04E-13 | 3.58E-13 |



|               |                    |         |          |         |      |          |          |
|---------------|--------------------|---------|----------|---------|------|----------|----------|
| Unigene27159  | Potri.010G090900.4 | 10.178  | 23.7055  | -1.2198 | Down | 1.30E-21 | 6.12E-21 |
| Unigene54275  | Potri.003G078900.1 | 10.3336 | 24.0687  | -1.2198 | Down | 1.04E-13 | 3.58E-13 |
| Unigene37239  | Potri.014G067300.6 | 43.2244 | 100.6806 | -1.2199 | Down | 1.01E-38 | 7.68E-38 |
| Unigene23907  | Potri.003G166300.1 | 12.9184 | 30.0899  | -1.2199 | Down | 5.11E-18 | 2.11E-17 |
| Unigene28389  | Potri.014G112400.6 | 16.9335 | 39.4456  | -1.22   | Down | 1.02E-18 | 4.32E-18 |
| Unigene12079  | Potri.007G029300.1 | 10.6652 | 24.844   | -1.22   | Down | 5.20E-23 | 2.55E-22 |
| Unigene33830  | Potri.005G130800.2 | 16.4926 | 38.4201  | -1.22   | Down | 1.53E-36 | 1.10E-35 |
| Unigene49331  | Potri.005G022600.1 | 3.1799  | 7.4074   | -1.22   | Down | 1.07E-05 | 2.25E-05 |
| Unigene104088 | Potri.002G008600.5 | 5.7987  | 13.5076  | -1.22   | Down | 1.07E-05 | 2.25E-05 |
| Unigene30641  | Potri.013G044600.1 | 16.5305 | 38.5108  | -1.2201 | Down | 4.07E-15 | 1.49E-14 |
| Unigene48408  | Potri.010G235900.1 | 33.2031 | 77.3507  | -1.2201 | Down | 3.08E-37 | 2.26E-36 |
| Unigene73417  | Potri.011G052700.2 | 14.142  | 32.9481  | -1.2202 | Down | 8.58E-11 | 2.56E-10 |
| Unigene42424  | Potri.011G044900.1 | 8.5197  | 19.8501  | -1.2203 | Down | 4.37E-30 | 2.66E-29 |
| Unigene14776  | Potri.018G056400.2 | 10.6925 | 24.9148  | -1.2204 | Down | 1.68E-11 | 5.21E-11 |
| Unigene30559  | Potri.018G016000.1 | 14.7596 | 34.3916  | -1.2204 | Down | 1.60E-16 | 6.22E-16 |
| Unigene32152  | Potri.015G039400.1 | 21.8116 | 50.8235  | -1.2204 | Down | 4.13E-76 | 6.40E-75 |
| Unigene50516  | Potri.008G151700.2 | 12.1336 | 28.2749  | -1.2205 | Down | 3.17E-17 | 1.27E-16 |
| Unigene43070  | Potri.006G191800.1 | 11.1389 | 25.9558  | -1.2205 | Down | 4.11E-42 | 3.39E-41 |
| Unigene8616   | Potri.004G049400.1 | 6.7817  | 15.8041  | -1.2206 | Down | 3.31E-12 | 1.06E-11 |
| Unigene63767  | Potri.001G185600.1 | 7.0032  | 16.3201  | -1.2206 | Down | 3.31E-12 | 1.06E-11 |
| Unigene7313   | Potri.013G049400.1 | 4.6984  | 10.9502  | -1.2207 | Down | 3.86E-07 | 9.17E-07 |
| Unigene42869  | Potri.004G016700.1 | 6.428   | 14.9808  | -1.2207 | Down | 1.50E-62 | 1.86E-61 |
| Unigene9075   | Potri.016G073500.4 | 46.4518 | 108.2768 | -1.2209 | Down | 7.52E-64 | 9.58E-63 |
| Unigene29109  | Potri.004G134100.1 | 8.4602  | 19.72    | -1.2209 | Down | 4.98E-20 | 2.22E-19 |
| Unigene22451  | Potri.013G086800.1 | 4.3098  | 10.0463  | -1.221  | Down | 2.54E-14 | 8.97E-14 |
| Unigene40286  | Potri.006G015200.1 | 9.0773  | 21.1595  | -1.221  | Down | 7.42E-08 | 1.86E-07 |
| Unigene15395  | Potri.019G104000.1 | 8.3958  | 19.5736  | -1.2212 | Down | 1.43E-08 | 3.76E-08 |
| Unigene6765   | Potri.013G075900.1 | 5.5359  | 12.9062  | -1.2212 | Down | 1.43E-08 | 3.76E-08 |
| Unigene64102  | Potri.010G192700.2 | 9.441   | 22.0102  | -1.2212 | Down | 1.43E-08 | 3.76E-08 |
| Unigene32675  | Potri.005G110900.2 | 33.855  | 78.939   | -1.2214 | Down | 3.25E-81 | 5.42E-80 |
| Unigene34788  | Potri.018G005600.1 | 10.3656 | 24.1713  | -1.2215 | Down | 1.26E-44 | 1.10E-43 |
| Unigene66242  | Potri.014G123800.3 | 3.8954  | 9.0834   | -1.2215 | Down | 5.43E-10 | 1.55E-09 |
| Unigene41894  | Potri.009G020900.1 | 10.8481 | 25.2959  | -1.2215 | Down | 5.43E-10 | 1.55E-09 |
| Unigene1737   | Potri.005G077600.1 | 9.0858  | 21.1874  | -1.2215 | Down | 3.08E-19 | 1.34E-18 |
| Unigene74059  | Potri.004G189700.3 | 13.7695 | 32.1106  | -1.2216 | Down | 1.06E-10 | 3.15E-10 |
| Unigene39314  | Potri.001G277200.1 | 5.3828  | 12.5536  | -1.2217 | Down | 2.08E-11 | 6.41E-11 |
| Unigene44854  | Potri.T131800.2    | 8.1122  | 18.9213  | -1.2218 | Down | 8.04E-13 | 2.66E-12 |
| Unigene77719  | Potri.013G047300.3 | 16.4886 | 38.4605  | -1.2219 | Down | 1.59E-13 | 5.42E-13 |
| Unigene26584  | Potri.011G155700.1 | 34.9072 | 81.4248  | -1.2219 | Down | 7.10E-39 | 5.42E-38 |

|               |                    |          |          |         |      |           |           |
|---------------|--------------------|----------|----------|---------|------|-----------|-----------|
| Unigene38375  | Potri.009G076000.2 | 20.6614  | 48.1929  | -1.2219 | Down | 8.73E-37  | 6.34E-36  |
| Unigene88003  | Potri.010G245100.1 | 38.1005  | 88.8759  | -1.222  | Down | 2.87E-40  | 2.27E-39  |
| Unigene38681  | Potri.006G087300.2 | 34.4517  | 80.3704  | -1.2221 | Down | 3.87E-59  | 4.53E-58  |
| Unigene51416  | Potri.005G021400.1 | 39.2161  | 91.4888  | -1.2221 | Down | 1.63E-32  | 1.06E-31  |
| Unigene74095  | Potri.009G159200.2 | 24.2273  | 56.5222  | -1.2222 | Down | 9.60E-18  | 3.93E-17  |
| Unigene37299  | Potri.006G101800.2 | 24.2531  | 56.5837  | -1.2222 | Down | 1.91E-18  | 8.03E-18  |
| Unigene43121  | Potri.002G129300.1 | 7.9519   | 18.5518  | -1.2222 | Down | 9.60E-18  | 3.93E-17  |
| Unigene2578   | Potri.018G006500.1 | 5.9693   | 13.9278  | -1.2223 | Down | 3.01E-21  | 1.40E-20  |
| Unigene19832  | Potri.006G087300.2 | 31.401   | 73.2679  | -1.2224 | Down | 1.20E-22  | 5.82E-22  |
| Unigene78920  | Potri.006G231800.1 | 37.6117  | 87.7685  | -1.2225 | Down | 1.24E-29  | 7.46E-29  |
| Unigene73433  | Potri.001G207100.1 | 164.0473 | 382.8069 | -1.2225 | Down | 3.96E-109 | 9.44E-108 |
| Unigene14214  | Potri.008G167600.1 | 31.0986  | 72.5763  | -1.2226 | Down | 4.36E-40  | 3.43E-39  |
| Unigene43895  | Potri.003G106200.3 | 19.6752  | 45.9161  | -1.2226 | Down | 2.66E-37  | 1.96E-36  |
| Unigene108347 | Potri.019G052100.1 | 11.9503  | 27.8956  | -1.223  | Down | 3.45E-09  | 9.37E-09  |
| Unigene32512  | Potri.019G022700.1 | 13.4339  | 31.3587  | -1.223  | Down | 2.48E-32  | 1.61E-31  |
| Unigene51995  | Potri.018G037000.1 | 10.7595  | 25.1158  | -1.223  | Down | 1.52E-15  | 5.65E-15  |
| Unigene34679  | Potri.017G033600.1 | 8.2684   | 19.3008  | -1.223  | Down | 5.05E-12  | 1.60E-11  |
| Unigene94850  | Potri.016G132000.1 | 3.7424   | 8.7359   | -1.223  | Down | 7.11E-05  | 1.39E-04  |
| Unigene52324  | Potri.016G014000.2 | 3.1699   | 7.3995   | -1.223  | Down | 7.11E-05  | 1.39E-04  |
| Unigene5227   | Potri.016G010200.1 | 4.5829   | 10.6978  | -1.223  | Down | 1.33E-05  | 2.78E-05  |
| Unigene115301 | Potri.014G179300.1 | 3.13     | 7.3064   | -1.223  | Down | 3.87E-04  | 6.98E-04  |
| Unigene35466  | Potri.014G177100.1 | 8.6076   | 20.0926  | -1.223  | Down | 4.79E-07  | 1.13E-06  |
| Unigene40062  | Potri.014G141400.1 | 2.0684   | 4.8282   | -1.223  | Down | 7.11E-05  | 1.39E-04  |
| Unigene106971 | Potri.014G118100.6 | 2.6696   | 6.2315   | -1.223  | Down | 1.33E-05  | 2.78E-05  |
| Unigene65489  | Potri.014G096300.2 | 2.7629   | 6.4495   | -1.223  | Down | 3.87E-04  | 6.98E-04  |
| Unigene94533  | Potri.013G131800.1 | 4.069    | 9.4983   | -1.223  | Down | 3.87E-04  | 6.98E-04  |
| Unigene35841  | Potri.013G088600.1 | 8.6912   | 20.2877  | -1.223  | Down | 4.79E-07  | 1.13E-06  |
| Unigene53445  | Potri.013G055600.2 | 4.2583   | 9.9401   | -1.223  | Down | 9.19E-08  | 2.28E-07  |
| Unigene29068  | Potri.011G045500.1 | 7.5054   | 17.5198  | -1.223  | Down | 5.96E-17  | 2.36E-16  |
| Unigene11508  | Potri.010G104000.1 | 7.4507   | 17.3921  | -1.223  | Down | 1.86E-20  | 8.42E-20  |
| Unigene49114  | Potri.009G130600.1 | 4.8071   | 11.2212  | -1.223  | Down | 9.19E-08  | 2.28E-07  |
| Unigene37893  | Potri.008G187600.1 | 14.5468  | 33.9565  | -1.223  | Down | 1.31E-10  | 3.88E-10  |
| Unigene25661  | Potri.008G055100.2 | 2.5504   | 5.9534   | -1.223  | Down | 3.87E-04  | 6.98E-04  |
| Unigene105786 | Potri.006G078800.1 | 3.1337   | 7.3149   | -1.223  | Down | 6.71E-10  | 1.91E-09  |
| Unigene25807  | Potri.003G071300.1 | 19.8788  | 46.403   | -1.223  | Down | 2.96E-23  | 1.46E-22  |
| Unigene34789  | Potri.001G276100.1 | 5.4687   | 12.7656  | -1.223  | Down | 9.34E-20  | 4.12E-19  |
| Unigene53022  | Potri.001G060300.1 | 8.9074   | 20.7923  | -1.223  | Down | 4.79E-07  | 1.13E-06  |
| Unigene102126 | Potri.004G210100.1 | 143.36   | 334.7602 | -1.2235 | Down | 2.16E-155 | 8.13E-154 |
| Unigene24393  | Potri.001G128800.1 | 7.5527   | 17.6379  | -1.2236 | Down | 1.82E-22  | 8.80E-22  |

|               |                    |         |          |         |      |           |           |
|---------------|--------------------|---------|----------|---------|------|-----------|-----------|
| Unigene10617  | Potri.005G242100.1 | 7.2346  | 16.8971  | -1.2238 | Down | 1.81E-49  | 1.75E-48  |
| Unigene8569   | Potri.001G293100.1 | 22.7113 | 53.0445  | -1.2238 | Down | 1.46E-17  | 5.93E-17  |
| Unigene103606 | Potri.010G238400.2 | 6.8287  | 15.9504  | -1.2239 | Down | 1.87E-15  | 6.95E-15  |
| Unigene42768  | Potri.001G418100.1 | 8.1731  | 19.0904  | -1.2239 | Down | 1.34E-44  | 1.17E-43  |
| Unigene53113  | Potri.014G081700.1 | 17.738  | 41.4354  | -1.224  | Down | 4.78E-14  | 1.67E-13  |
| Unigene13841  | Potri.002G170700.1 | 4.588   | 10.7176  | -1.224  | Down | 7.19E-26  | 3.86E-25  |
| Unigene1456   | Potri.015G071800.2 | 28.692  | 67.0256  | -1.2241 | Down | 2.23E-49  | 2.15E-48  |
| Unigene76257  | Potri.014G147100.1 | 14.754  | 34.47    | -1.2242 | Down | 6.24E-12  | 1.97E-11  |
| Unigene52805  | Potri.006G116800.2 | 86.5735 | 202.2606 | -1.2242 | Down | 9.78E-148 | 3.44E-146 |
| Unigene38051  | Potri.T010700.4    | 14.8127 | 34.6093  | -1.2243 | Down | 3.18E-11  | 9.70E-11  |
| Unigene1017   | Potri.005G075600.1 | 6.0621  | 14.1634  | -1.2243 | Down | 2.31E-31  | 1.46E-30  |
| Unigene41281  | Potri.002G100000.6 | 12.9534 | 30.265   | -1.2243 | Down | 3.18E-11  | 9.70E-11  |
| Unigene49319  | Potri.001G205700.5 | 26.3095 | 61.4738  | -1.2244 | Down | 2.86E-29  | 1.70E-28  |
| Unigene24771  | Potri.001G193000.1 | 47.655  | 111.3488 | -1.2244 | Down | 7.60E-57  | 8.53E-56  |
| Unigene75917  | Potri.018G124600.1 | 36.6305 | 85.5963  | -1.2245 | Down | 3.55E-27  | 1.99E-26  |
| Unigene23662  | Potri.014G079900.1 | 12.065  | 28.1937  | -1.2245 | Down | 3.59E-18  | 1.49E-17  |
| Unigene31334  | Potri.013G147600.1 | 9.7006  | 22.6686  | -1.2245 | Down | 8.30E-10  | 2.34E-09  |
| Unigene43435  | Potri.010G060800.1 | 5.0252  | 11.7429  | -1.2245 | Down | 3.59E-18  | 1.49E-17  |
| Unigene2347   | Potri.008G119100.1 | 54.232  | 126.723  | -1.2245 | Down | 2.68E-106 | 6.17E-105 |
| Unigene20725  | Potri.004G185200.2 | 8.5983  | 20.0926  | -1.2245 | Down | 8.30E-10  | 2.34E-09  |
| Unigene44682  | Potri.017G043100.1 | 26.7983 | 62.6271  | -1.2246 | Down | 4.64E-56  | 5.12E-55  |
| Unigene36512  | Potri.003G190800.3 | 18.7879 | 43.9061  | -1.2246 | Down | 1.80E-17  | 7.29E-17  |
| Unigene67     | Potri.007G049300.1 | 13.1171 | 30.6587  | -1.2248 | Down | 3.21E-64  | 4.11E-63  |
| Unigene32573  | Potri.015G071200.1 | 14.2399 | 33.2842  | -1.2249 | Down | 2.30E-35  | 1.61E-34  |
| Unigene53144  | Potri.015G012200.3 | 9.5267  | 22.2671  | -1.2249 | Down | 2.20E-08  | 5.70E-08  |
| Unigene2217   | Potri.013G118000.5 | 10.1217 | 23.6583  | -1.2249 | Down | 2.30E-35  | 1.61E-34  |
| Unigene71460  | Potri.005G233800.3 | 10.8408 | 25.3385  | -1.2249 | Down | 2.20E-08  | 5.70E-08  |
| Unigene28596  | Potri.001G035500.2 | 3.4547  | 8.0749   | -1.2249 | Down | 2.20E-08  | 5.70E-08  |
| Unigene18173  | Potri.T094000.1    | 18.4715 | 43.1818  | -1.2251 | Down | 7.04E-32  | 4.51E-31  |
| Unigene31984  | Potri.001G331700.1 | 2.292   | 5.358    | -1.2251 | Down | 5.90E-14  | 2.05E-13  |
| Unigene50396  | Potri.011G169000.2 | 12.2663 | 28.678   | -1.2252 | Down | 8.80E-19  | 3.74E-18  |
| Unigene8567   | Potri.002G124700.1 | 25.3637 | 59.2955  | -1.2252 | Down | 1.75E-19  | 7.65E-19  |
| Unigene19212  | Potri.013G107500.1 | 7.5891  | 17.7441  | -1.2253 | Down | 5.94E-07  | 1.39E-06  |
| Unigene47596  | Potri.011G127000.2 | 5.6734  | 13.265   | -1.2253 | Down | 5.94E-07  | 1.39E-06  |
| Unigene44908  | Potri.011G090800.1 | 6.4898  | 15.1731  | -1.2253 | Down | 2.73E-24  | 1.40E-23  |
| Unigene53654  | Potri.005G179300.1 | 7.4599  | 17.4421  | -1.2253 | Down | 5.94E-07  | 1.39E-06  |
| Unigene3058   | Potri.002G123500.1 | 6.4294  | 15.0326  | -1.2253 | Down | 4.42E-18  | 1.83E-17  |
| Unigene20976  | Potri.002G215900.1 | 11.2398 | 26.2818  | -1.2254 | Down | 2.22E-17  | 8.96E-17  |
| Unigene68683  | Potri.T044200.3    | 3.028   | 7.0806   | -1.2255 | Down | 7.71E-12  | 2.43E-11  |

|               |                    |         |          |         |      |          |          |
|---------------|--------------------|---------|----------|---------|------|----------|----------|
| Unigene5104   | Potri.018G113100.1 | 8.9195  | 20.857   | -1.2255 | Down | 7.71E-12 | 2.43E-11 |
| Unigene75982  | Potri.018G106800.5 | 43.9602 | 102.7952 | -1.2255 | Down | 1.74E-32 | 1.13E-31 |
| Unigene18353  | Potri.014G172300.2 | 16.8214 | 39.3342  | -1.2255 | Down | 1.01E-68 | 1.39E-67 |
| Unigene12353  | Potri.013G007800.5 | 22.4435 | 52.4812  | -1.2255 | Down | 9.39E-43 | 7.85E-42 |
| Unigene27786  | Potri.012G134400.1 | 24.6768 | 57.705   | -1.2255 | Down | 5.40E-27 | 3.00E-26 |
| Unigene84841  | Potri.006G020700.6 | 11.6396 | 27.2176  | -1.2255 | Down | 7.71E-12 | 2.43E-11 |
| Unigene2677   | Potri.004G177600.1 | 4.6489  | 10.8714  | -1.2256 | Down | 1.12E-16 | 4.38E-16 |
| Unigene7492   | Potri.001G348400.1 | 7.9947  | 18.6955  | -1.2256 | Down | 1.41E-36 | 1.02E-35 |
| Unigene51117  | Potri.014G163400.1 | 6.5917  | 15.4159  | -1.2257 | Down | 3.11E-06 | 6.89E-06 |
| Unigene9710   | Potri.009G163200.3 | 4.4072  | 10.3069  | -1.2257 | Down | 3.11E-06 | 6.89E-06 |
| Unigene4002   | Potri.009G149600.2 | 35.0159 | 81.8935  | -1.2257 | Down | 2.84E-39 | 2.19E-38 |
| Unigene31680  | Potri.004G046900.2 | 4.167   | 9.7452   | -1.2257 | Down | 3.11E-06 | 6.89E-06 |
| Unigene114800 | Potri.001G050000.2 | 16.6226 | 38.8748  | -1.2257 | Down | 5.65E-16 | 2.14E-15 |
| Unigene115941 | Potri.004G161700.3 | 14.4028 | 33.6866  | -1.2258 | Down | 2.85E-15 | 1.05E-14 |
| Unigene68315  | Potri.004G074100.1 | 8.2496  | 19.295   | -1.2258 | Down | 2.85E-15 | 1.05E-14 |
| Unigene45832  | Potri.004G057100.1 | 9.3545  | 21.8786  | -1.2258 | Down | 4.30E-20 | 1.92E-19 |
| Unigene28068  | Potri.003G146900.4 | 29.1263 | 68.1227  | -1.2258 | Down | 1.92E-47 | 1.78E-46 |
| Unigene87174  | Potri.002G171500.1 | 13.9873 | 32.7149  | -1.2258 | Down | 2.85E-15 | 1.05E-14 |
| Unigene34817  | Potri.014G110200.1 | 16.3865 | 38.332   | -1.226  | Down | 8.42E-23 | 4.10E-22 |
| Unigene93590  | Potri.005G020100.1 | 2.1614  | 5.0564   | -1.2261 | Down | 1.65E-05 | 3.42E-05 |
| Unigene29657  | Potri.001G381300.1 | 8.1593  | 19.088   | -1.2261 | Down | 7.28E-14 | 2.53E-13 |
| Unigene118806 | Potri.017G090700.2 | 2.6373  | 6.1698   | -1.2262 | Down | 1.65E-05 | 3.42E-05 |
| Unigene32415  | Potri.012G143100.1 | 12.1403 | 28.4032  | -1.2262 | Down | 2.88E-45 | 2.55E-44 |
| Unigene118964 | Potri.007G119300.1 | 2.4447  | 5.7192   | -1.2262 | Down | 1.65E-05 | 3.42E-05 |
| Unigene40842  | Potri.004G215900.1 | 4.0796  | 9.544    | -1.2262 | Down | 1.65E-05 | 3.42E-05 |
| Unigene9754   | Potri.003G074200.1 | 3.2637  | 7.6352   | -1.2262 | Down | 1.65E-05 | 3.42E-05 |
| Unigene49812  | Potri.001G392800.1 | 4.2067  | 9.8413   | -1.2262 | Down | 7.28E-14 | 2.53E-13 |
| Unigene95063  | Potri.002G242800.1 | 1.8167  | 4.2509   | -1.2264 | Down | 5.28E-09 | 1.42E-08 |
| Unigene38273  | Potri.002G112100.3 | 50.7573 | 118.7656 | -1.2264 | Down | 4.83E-73 | 7.11E-72 |
| Unigene9554   | Potri.001G130100.4 | 20.7503 | 48.5514  | -1.2264 | Down | 1.06E-20 | 4.82E-20 |
| Unigene34406  | Potri.006G199800.6 | 50.483  | 118.1306 | -1.2265 | Down | 9.96E-57 | 1.11E-55 |
| Unigene4197   | Potri.008G134900.1 | 12.7064 | 29.7341  | -1.2266 | Down | 1.87E-12 | 6.08E-12 |
| Unigene43596  | Potri.015G120200.1 | 36.9933 | 86.5731  | -1.2267 | Down | 2.94E-72 | 4.28E-71 |
| Unigene21554  | Potri.005G000500.1 | 34.3828 | 80.4656  | -1.2267 | Down | 1.52E-92 | 2.94E-91 |
| Unigene85707  | Potri.018G004400.3 | 3.7044  | 8.6701   | -1.2268 | Down | 8.85E-05 | 1.71E-04 |
| Unigene15802  | Potri.012G082700.2 | 14.0024 | 32.7724  | -1.2268 | Down | 3.52E-15 | 1.29E-14 |
| Unigene54034  | Potri.011G058500.1 | 4.5834  | 10.7274  | -1.2268 | Down | 2.72E-08 | 7.01E-08 |
| Unigene26778  | Potri.006G211300.1 | 2.3413  | 5.4798   | -1.2268 | Down | 8.85E-05 | 1.71E-04 |
| Unigene108032 | Potri.001G000400.2 | 5.3024  | 12.4101  | -1.2268 | Down | 8.85E-05 | 1.71E-04 |

|               |                    |         |          |         |      |           |           |
|---------------|--------------------|---------|----------|---------|------|-----------|-----------|
| Unigene21298  | Potri.006G054100.1 | 8.8138  | 20.631   | -1.227  | Down | 2.30E-92  | 4.43E-91  |
| Unigene39079  | Potri.011G090900.1 | 7.9928  | 18.7106  | -1.2271 | Down | 4.85E-11  | 1.47E-10  |
| Unigene53104  | Potri.006G193900.1 | 13.5483 | 31.7157  | -1.2271 | Down | 4.85E-11  | 1.47E-10  |
| Unigene51020  | Potri.005G180700.1 | 11.8481 | 27.7357  | -1.2271 | Down | 4.85E-11  | 1.47E-10  |
| Unigene26157  | Potri.003G146000.4 | 18.4418 | 43.173   | -1.2271 | Down | 3.39E-17  | 1.35E-16  |
| Unigene39713  | Potri.011G057100.1 | 4.0963  | 9.5901   | -1.2272 | Down | 8.99E-14  | 3.10E-13  |
| Unigene53939  | Potri.006G106800.1 | 7.403   | 17.3318  | -1.2272 | Down | 1.41E-07  | 3.46E-07  |
| Unigene40068  | Potri.018G063600.2 | 16.0689 | 37.6223  | -1.2273 | Down | 1.33E-43  | 1.13E-42  |
| Unigene11314  | Potri.017G137300.1 | 22.0994 | 51.7414  | -1.2273 | Down | 1.10E-49  | 1.07E-48  |
| Unigene53489  | Potri.008G148300.1 | 9.6496  | 22.5917  | -1.2273 | Down | 1.41E-07  | 3.46E-07  |
| Unigene50850  | Potri.013G147600.1 | 12.9813 | 30.3953  | -1.2274 | Down | 3.29E-19  | 1.42E-18  |
| Unigene15825  | Potri.012G064100.3 | 66.2907 | 155.2177 | -1.2274 | Down | 1.34E-45  | 1.19E-44  |
| Unigene42215  | Potri.007G041100.6 | 7.6804  | 17.983   | -1.2274 | Down | 2.52E-25  | 1.33E-24  |
| Unigene3891   | Potri.005G196300.4 | 12.1629 | 28.4791  | -1.2274 | Down | 2.48E-10  | 7.20E-10  |
| Unigene50923  | Potri.004G218200.1 | 13.1956 | 30.8971  | -1.2274 | Down | 2.48E-10  | 7.20E-10  |
| Unigene44202  | Potri.017G028300.2 | 20.4782 | 47.9521  | -1.2275 | Down | 1.26E-24  | 6.51E-24  |
| Unigene44471  | Potri.008G106600.1 | 26.9551 | 63.1176  | -1.2275 | Down | 1.99E-33  | 1.33E-32  |
| Unigene50914  | Potri.007G069300.1 | 98.5884 | 230.8565 | -1.2275 | Down | 1.48E-150 | 5.34E-149 |
| Unigene59778  | Potri.003G060700.1 | 7.912   | 18.5269  | -1.2275 | Down | 4.55E-13  | 1.52E-12  |
| Unigene37697  | Potri.005G207000.2 | 12.7854 | 29.9397  | -1.2276 | Down | 4.96E-30  | 3.01E-29  |
| Unigene110497 | Potri.019G003100.1 | 7.6597  | 17.9398  | -1.2278 | Down | 7.36E-07  | 1.71E-06  |
| Unigene18769  | Potri.015G146900.1 | 5.4773  | 12.8285  | -1.2278 | Down | 3.15E-23  | 1.56E-22  |
| Unigene31768  | Potri.015G034500.1 | 2.1885  | 5.1257   | -1.2278 | Down | 4.83E-04  | 8.56E-04  |
| Unigene9789   | Potri.006G258100.5 | 2.2546  | 5.2806   | -1.2278 | Down | 7.36E-07  | 1.71E-06  |
| Unigene53059  | Potri.005G180800.3 | 8.2095  | 19.2274  | -1.2278 | Down | 7.36E-07  | 1.71E-06  |
| Unigene2557   | Potri.003G181300.1 | 2.3568  | 5.5199   | -1.2278 | Down | 4.83E-04  | 8.56E-04  |
| Unigene3135   | Potri.003G106200.2 | 1.7762  | 4.16     | -1.2278 | Down | 4.83E-04  | 8.56E-04  |
| Unigene43373  | Potri.008G096800.3 | 13.7205 | 32.1372  | -1.2279 | Down | 2.45E-33  | 1.63E-32  |
| Unigene51022  | Potri.015G104600.1 | 22.5837 | 52.9001  | -1.228  | Down | 8.07E-20  | 3.57E-19  |
| Unigene33362  | Potri.006G259600.1 | 9.6083  | 22.506   | -1.228  | Down | 1.58E-22  | 7.62E-22  |
| Unigene23398  | Potri.019G077400.1 | 3.6096  | 8.4568   | -1.2283 | Down | 6.53E-09  | 1.74E-08  |
| Unigene54106  | Potri.009G051500.1 | 6.7817  | 15.8885  | -1.2283 | Down | 2.10E-16  | 8.15E-16  |
| Unigene110170 | Potri.T146500.1    | 44.3882 | 104.0088 | -1.2285 | Down | 1.50E-32  | 9.80E-32  |
| Unigene10386  | Potri.017G050200.1 | 9.3249  | 21.8507  | -1.2285 | Down | 6.00E-11  | 1.80E-10  |
| Unigene17366  | Potri.008G089600.2 | 2.3872  | 5.5938   | -1.2285 | Down | 3.87E-06  | 8.49E-06  |
| Unigene41529  | Potri.006G106600.1 | 3.8955  | 9.1282   | -1.2285 | Down | 6.00E-11  | 1.80E-10  |
| Unigene58330  | Potri.005G201300.3 | 5.9679  | 13.9845  | -1.2285 | Down | 3.87E-06  | 8.49E-06  |
| Unigene50133  | Potri.001G356800.1 | 24.1613 | 56.6186  | -1.2286 | Down | 2.34E-71  | 3.37E-70  |
| Unigene24176  | Potri.001G156000.1 | 6.8792  | 16.1222  | -1.2287 | Down | 9.95E-20  | 4.39E-19  |

|               |                    |         |          |         |      |          |          |
|---------------|--------------------|---------|----------|---------|------|----------|----------|
| Unigene24279  | Potri.001G121200.1 | 6.2135  | 14.5613  | -1.2287 | Down | 1.51E-40 | 1.20E-39 |
| Unigene34556  | Potri.018G017200.1 | 21.3034 | 49.9295  | -1.2288 | Down | 3.72E-35 | 2.58E-34 |
| Unigene4830   | Potri.014G146900.5 | 19.6253 | 45.9966  | -1.2288 | Down | 9.73E-22 | 4.59E-21 |
| Unigene53323  | Potri.008G017800.4 | 12.9639 | 30.3839  | -1.2288 | Down | 5.35E-15 | 1.95E-14 |
| Unigene7641   | Potri.006G111100.2 | 3.5569  | 8.3374   | -1.229  | Down | 3.06E-10 | 8.86E-10 |
| Unigene24215  | Potri.005G146800.1 | 28.2721 | 66.2717  | -1.229  | Down | 3.83E-49 | 3.68E-48 |
| Unigene37757  | Potri.002G066100.2 | 10.2608 | 24.0514  | -1.229  | Down | 3.06E-10 | 8.86E-10 |
| Unigene51068  | Potri.002G009800.5 | 56.1009 | 131.5004 | -1.229  | Down | 1.65E-88 | 3.04E-87 |
| Unigene17269  | Potri.006G112100.3 | 15.336  | 35.9508  | -1.2291 | Down | 4.72E-25 | 2.47E-24 |
| Unigene44230  | Potri.002G055500.1 | 42.8945 | 100.5543 | -1.2291 | Down | 4.08E-61 | 4.95E-60 |
| Unigene90108  | Potri.010G026100.1 | 28.3997 | 66.5803  | -1.2292 | Down | 4.58E-35 | 3.17E-34 |
| Unigene44431  | Potri.002G028300.1 | 3.8802  | 9.0969   | -1.2292 | Down | 2.51E-18 | 1.05E-17 |
| Unigene93922  | Potri.018G020400.1 | 28.962  | 67.9012  | -1.2293 | Down | 1.03E-63 | 1.30E-62 |
| Unigene45329  | Potri.002G252800.1 | 20.9904 | 49.2147  | -1.2294 | Down | 2.28E-34 | 1.55E-33 |
| Unigene112707 | Potri.013G031700.1 | 18.0433 | 42.3088  | -1.2295 | Down | 1.31E-15 | 4.89E-15 |
| Unigene49813  | Potri.010G201500.2 | 2.3572  | 5.5273   | -1.2295 | Down | 1.75E-07 | 4.26E-07 |
| Unigene19192  | Potri.010G076900.2 | 6.6513  | 15.5964  | -1.2295 | Down | 1.75E-07 | 4.26E-07 |
| Unigene63409  | Potri.009G085400.2 | 2.0962  | 4.9152   | -1.2295 | Down | 2.05E-05 | 4.21E-05 |
| Unigene50949  | Potri.005G131200.1 | 3.0052  | 7.0467   | -1.2295 | Down | 2.05E-05 | 4.21E-05 |
| Unigene52504  | Potri.005G055300.1 | 2.3355  | 5.4764   | -1.2295 | Down | 2.05E-05 | 4.21E-05 |
| Unigene35599  | Potri.003G043900.1 | 13.6071 | 31.9067  | -1.2295 | Down | 1.45E-11 | 4.51E-11 |
| Unigene34675  | Potri.001G390600.1 | 6.3061  | 14.7882  | -1.2296 | Down | 5.65E-39 | 4.32E-38 |
| Unigene44662  | Potri.012G038900.6 | 18.0692 | 42.3743  | -1.2297 | Down | 5.66E-31 | 3.53E-30 |
| Unigene6639   | Potri.008G085700.1 | 19.802  | 46.4383  | -1.2297 | Down | 5.70E-29 | 3.36E-28 |
| Unigene39442  | Potri.005G236200.2 | 5.9051  | 13.8514  | -1.23   | Down | 7.41E-11 | 2.22E-10 |
| Unigene7175   | Potri.014G191400.3 | 6.0539  | 14.2016  | -1.2301 | Down | 8.08E-09 | 2.15E-08 |
| Unigene63647  | Potri.013G018800.2 | 6.5143  | 15.2817  | -1.2301 | Down | 8.08E-09 | 2.15E-08 |
| Unigene11920  | Potri.001G026800.2 | 15.7395 | 36.9218  | -1.2301 | Down | 6.95E-33 | 4.57E-32 |
| Unigene30947  | Potri.001G003900.2 | 8.5969  | 20.1673  | -1.2301 | Down | 8.08E-09 | 2.15E-08 |
| Unigene33949  | Potri.010G076500.1 | 5.9926  | 14.0588  | -1.2302 | Down | 3.34E-14 | 1.18E-13 |
| Unigene77962  | Potri.008G171100.4 | 17.0558 | 40.0135  | -1.2302 | Down | 3.34E-14 | 1.18E-13 |
| Unigene27907  | Potri.014G088400.1 | 2.909   | 6.8252   | -1.2303 | Down | 9.13E-07 | 2.11E-06 |
| Unigene26965  | Potri.008G058100.1 | 22.5878 | 52.9932  | -1.2303 | Down | 1.51E-19 | 6.63E-19 |
| Unigene20742  | Potri.007G074000.3 | 32.2439 | 75.6499  | -1.2303 | Down | 1.72E-35 | 1.21E-34 |
| Unigene49869  | Potri.015G020400.1 | 2.8692  | 6.7319   | -1.2304 | Down | 9.13E-07 | 2.11E-06 |
| Unigene66671  | Potri.008G019900.1 | 3.9034  | 9.1585   | -1.2304 | Down | 9.13E-07 | 2.11E-06 |
| Unigene9254   | Potri.004G158000.1 | 2.0444  | 4.7968   | -1.2304 | Down | 9.13E-07 | 2.11E-06 |
| Unigene1839   | Potri.001G169700.3 | 4.8793  | 11.4481  | -1.2304 | Down | 9.13E-07 | 2.11E-06 |
| Unigene89948  | Potri.015G138500.1 | 52.2598 | 122.6248 | -1.2305 | Down | 1.44E-62 | 1.79E-61 |

|               |                    |         |          |         |      |          |          |
|---------------|--------------------|---------|----------|---------|------|----------|----------|
| Unigene36916  | Potri.013G093400.2 | 27.4008 | 64.2963  | -1.2305 | Down | 3.58E-24 | 1.83E-23 |
| Unigene32978  | Potri.001G110100.1 | 9.596   | 22.5166  | -1.2305 | Down | 2.14E-43 | 1.81E-42 |
| Unigene5276   | Potri.001G193400.1 | 17.9393 | 42.0988  | -1.2307 | Down | 1.69E-13 | 5.77E-13 |
| Unigene13731  | Potri.011G087600.1 | 30.0407 | 70.5046  | -1.2308 | Down | 4.45E-65 | 5.79E-64 |
| Unigene53661  | Potri.014G023500.1 | 8.8134  | 20.6861  | -1.2309 | Down | 4.17E-08 | 1.06E-07 |
| Unigene12318  | Potri.012G079600.1 | 9.5211  | 22.347   | -1.2309 | Down | 1.32E-44 | 1.14E-43 |
| Unigene28112  | Potri.010G036500.1 | 2.3899  | 5.6094   | -1.2309 | Down | 1.10E-04 | 2.10E-04 |
| Unigene16466  | Potri.007G004600.1 | 10.107  | 23.7222  | -1.2309 | Down | 1.80E-11 | 5.55E-11 |
| Unigene32387  | Potri.006G259500.1 | 3.4019  | 7.9847   | -1.2309 | Down | 8.15E-15 | 2.95E-14 |
| Unigene35708  | Potri.006G083400.1 | 5.9679  | 14.0074  | -1.2309 | Down | 4.17E-08 | 1.06E-07 |
| Unigene90638  | Potri.004G018100.6 | 2.6848  | 6.3015   | -1.2309 | Down | 1.10E-04 | 2.10E-04 |
| Unigene38386  | Potri.003G203100.1 | 2.611   | 6.1282   | -1.2309 | Down | 1.10E-04 | 2.10E-04 |
| Unigene20757  | Potri.001G359200.2 | 3.589   | 8.4237   | -1.2309 | Down | 1.10E-04 | 2.10E-04 |
| Unigene12690  | Potri.001G348700.1 | 14.483  | 33.9933  | -1.2309 | Down | 2.12E-31 | 1.34E-30 |
| Unigene112635 | Potri.001G143200.3 | 17.0512 | 40.0212  | -1.2309 | Down | 8.15E-15 | 2.95E-14 |
| Unigene24410  | Potri.008G189500.3 | 9.6962  | 22.7598  | -1.231  | Down | 2.14E-29 | 1.27E-28 |
| Unigene93884  | Potri.002G080800.3 | 24.6802 | 57.9317  | -1.231  | Down | 8.37E-54 | 8.83E-53 |
| Unigene13769  | Potri.014G149200.1 | 5.1376  | 12.0601  | -1.2311 | Down | 3.95E-16 | 1.51E-15 |
| Unigene11044  | Potri.010G099000.2 | 15.3872 | 36.1239  | -1.2312 | Down | 5.89E-84 | 1.02E-82 |
| Unigene71308  | Potri.007G044400.3 | 12.3716 | 29.0448  | -1.2312 | Down | 1.94E-09 | 5.37E-09 |
| Unigene42924  | Potri.005G048900.1 | 12.317  | 28.9183  | -1.2313 | Down | 1.02E-51 | 1.03E-50 |
| Unigene27717  | Potri.001G400900.4 | 42.3136 | 99.3431  | -1.2313 | Down | 1.61E-42 | 1.34E-41 |
| Unigene27821  | Potri.016G129900.1 | 14.0889 | 33.0823  | -1.2315 | Down | 4.58E-20 | 2.04E-19 |
| Unigene49617  | Potri.010G005600.1 | 2.3539  | 5.5271   | -1.2315 | Down | 4.80E-06 | 1.04E-05 |
| Unigene33285  | Potri.008G128800.1 | 2.2041  | 5.1754   | -1.2315 | Down | 4.80E-06 | 1.04E-05 |
| Unigene18983  | Potri.006G110800.1 | 3.3212  | 7.7985   | -1.2315 | Down | 4.80E-06 | 1.04E-05 |
| Unigene119562 | Potri.003G073000.1 | 1.8867  | 4.4303   | -1.2315 | Down | 9.16E-11 | 2.73E-10 |
| Unigene53006  | Potri.003G071300.1 | 6.4653  | 15.1811  | -1.2315 | Down | 4.80E-06 | 1.04E-05 |
| Unigene17667  | Potri.001G189800.6 | 67.2049 | 157.8199 | -1.2316 | Down | 3.81E-98 | 7.97E-97 |
| Unigene86708  | Potri.T082100.1    | 37.4218 | 87.8804  | -1.2317 | Down | 7.95E-38 | 5.92E-37 |
| Unigene93421  | Potri.010G106100.2 | 5.7733  | 13.5581  | -1.2317 | Down | 4.36E-12 | 1.39E-11 |
| Unigene2863   | Potri.003G218500.4 | 5.5214  | 12.9671  | -1.2317 | Down | 4.71E-18 | 1.95E-17 |
| Unigene16845  | Potri.001G416600.2 | 14.6241 | 34.3433  | -1.2317 | Down | 4.36E-12 | 1.39E-11 |
| Unigene20350  | Potri.016G016800.1 | 12.0711 | 28.3507  | -1.2318 | Down | 2.09E-13 | 7.09E-13 |
| Unigene33469  | Potri.011G169000.3 | 20.0535 | 47.0988  | -1.2318 | Down | 3.95E-37 | 2.89E-36 |
| Unigene43284  | Potri.005G191700.1 | 11.1849 | 26.2688  | -1.2318 | Down | 1.08E-81 | 1.81E-80 |
| Unigene18752  | Potri.002G255600.1 | 20.353  | 47.8002  | -1.2318 | Down | 6.50E-30 | 3.93E-29 |
| Unigene38822  | Potri.002G115400.1 | 5.6344  | 13.2332  | -1.2318 | Down | 2.17E-07 | 5.24E-07 |
| Unigene21832  | Potri.014G132900.1 | 5.5863  | 13.1209  | -1.2319 | Down | 1.13E-20 | 5.13E-20 |

|               |                    |          |          |         |      |           |           |
|---------------|--------------------|----------|----------|---------|------|-----------|-----------|
| Unigene50136  | Potri.013G011600.2 | 9.3028   | 21.8501  | -1.2319 | Down | 1.32E-26  | 7.27E-26  |
| Unigene45227  | Potri.010G012800.3 | 10.4816  | 24.6198  | -1.232  | Down | 6.55E-28  | 3.74E-27  |
| Unigene80304  | Potri.010G226300.7 | 43.491   | 102.1713 | -1.2322 | Down | 9.78E-36  | 6.92E-35  |
| Unigene72728  | Potri.015G105100.1 | 142.9218 | 335.7783 | -1.2323 | Down | 8.57E-96  | 1.73E-94  |
| Unigene101561 | Potri.005G196400.1 | 74.4644  | 174.958  | -1.2324 | Down | 4.80E-67  | 6.45E-66  |
| Unigene52349  | Potri.004G229700.4 | 34.5506  | 81.1834  | -1.2325 | Down | 1.95E-77  | 3.08E-76  |
| Unigene13549  | Potri.019G057400.1 | 8.2826   | 19.4638  | -1.2326 | Down | 2.84E-19  | 1.23E-18  |
| Unigene18962  | Potri.012G064200.1 | 8.494    | 19.96    | -1.2326 | Down | 5.81E-18  | 2.39E-17  |
| Unigene86589  | Potri.004G203500.1 | 16.9879  | 39.92    | -1.2326 | Down | 5.81E-18  | 2.39E-17  |
| Unigene70323  | Potri.017G072000.1 | 6.9964   | 16.4415  | -1.2327 | Down | 1.39E-20  | 6.30E-20  |
| Unigene33333  | Potri.014G055900.1 | 11.4656  | 26.9465  | -1.2328 | Down | 9.86E-30  | 5.94E-29  |
| Unigene20529  | Potri.004G038500.1 | 35.5193  | 83.4756  | -1.2328 | Down | 2.88E-51  | 2.89E-50  |
| Unigene56256  | Potri.014G087900.1 | 4.0373   | 9.4902   | -1.233  | Down | 5.38E-12  | 1.71E-11  |
| Unigene22674  | Potri.012G019300.1 | 11.1438  | 26.1948  | -1.233  | Down | 2.44E-30  | 1.49E-29  |
| Unigene46389  | Potri.011G077500.1 | 5.495    | 12.9167  | -1.233  | Down | 2.55E-05  | 5.19E-05  |
| Unigene14844  | Potri.007G011100.1 | 13.7825  | 32.3974  | -1.233  | Down | 1.42E-18  | 6.01E-18  |
| Unigene13891  | Potri.005G185900.1 | 2.4386   | 5.7322   | -1.233  | Down | 1.13E-06  | 2.59E-06  |
| Unigene75952  | Potri.005G083500.2 | 9.1994   | 21.6243  | -1.233  | Down | 5.17E-08  | 1.31E-07  |
| Unigene15486  | Potri.004G233300.4 | 15.1961  | 35.7202  | -1.233  | Down | 2.92E-17  | 1.17E-16  |
| Unigene29295  | Potri.003G079600.1 | 11.3473  | 26.6731  | -1.233  | Down | 2.01E-26  | 1.10E-25  |
| Unigene107739 | Potri.002G090500.1 | 8.0846   | 19.0038  | -1.233  | Down | 1.13E-06  | 2.59E-06  |
| Unigene10268  | Potri.001G060200.3 | 10.406   | 24.4606  | -1.233  | Down | 1.13E-10  | 3.35E-10  |
| Unigene43926  | Potri.001G058200.1 | 3.6081   | 8.4813   | -1.233  | Down | 1.13E-10  | 3.35E-10  |
| Unigene50588  | Potri.006G153700.1 | 61.8582  | 145.4227 | -1.2332 | Down | 5.67E-81  | 9.42E-80  |
| Unigene19663  | Potri.018G088000.1 | 85.1632  | 200.2256 | -1.2333 | Down | 1.30E-125 | 3.71E-124 |
| Unigene83839  | Potri.011G140100.5 | 33.7472  | 79.34    | -1.2333 | Down | 6.02E-31  | 3.75E-30  |
| Unigene23709  | Potri.009G125400.1 | 14.1747  | 33.3327  | -1.2336 | Down | 1.12E-38  | 8.51E-38  |
| Unigene18166  | Potri.011G087900.2 | 8.8753   | 20.8738  | -1.2338 | Down | 8.59E-20  | 3.79E-19  |
| Unigene105086 | Potri.017G049300.1 | 4.6707   | 10.9854  | -1.2339 | Down | 5.79E-10  | 1.65E-09  |
| Unigene166    | Potri.009G140100.1 | 3.528    | 8.2982   | -1.2339 | Down | 3.60E-17  | 1.44E-16  |
| Unigene6984   | Potri.003G117400.1 | 28.4084  | 66.8196  | -1.234  | Down | 9.10E-33  | 5.97E-32  |
| Unigene29306  | Potri.002G149800.2 | 14.4859  | 34.0783  | -1.2342 | Down | 3.05E-26  | 1.66E-25  |
| Unigene52067  | Potri.009G014500.4 | 3.5907   | 8.4476   | -1.2343 | Down | 2.68E-07  | 6.46E-07  |
| Unigene43329  | Potri.007G064800.1 | 14.4785  | 34.063   | -1.2343 | Down | 1.58E-58  | 1.83E-57  |
| Unigene15052  | Potri.004G034800.1 | 2.9243   | 6.8797   | -1.2343 | Down | 2.68E-07  | 6.46E-07  |
| Unigene84683  | Potri.019G020800.4 | 64.2455  | 151.1593 | -1.2344 | Down | 3.93E-59  | 4.60E-58  |
| Unigene35091  | Potri.009G023100.1 | 21.5487  | 50.7     | -1.2344 | Down | 3.72E-28  | 2.14E-27  |
| Unigene32835  | Potri.008G020600.1 | 3.2225   | 7.5821   | -1.2344 | Down | 6.65E-12  | 2.10E-11  |
| Unigene11658  | Potri.005G082200.1 | 20.8625  | 49.0882  | -1.2345 | Down | 1.56E-56  | 1.74E-55  |



|               |                    |         |          |         |      |           |           |
|---------------|--------------------|---------|----------|---------|------|-----------|-----------|
| Unigene10679  | Potri.004G066100.1 | 7.9809  | 18.779   | -1.2345 | Down | 6.85E-36  | 4.86E-35  |
| Unigene119425 | Potri.011G141400.1 | 1.8432  | 4.3373   | -1.2346 | Down | 5.96E-06  | 1.29E-05  |
| Unigene28179  | Potri.005G253400.1 | 3.5883  | 8.444    | -1.2346 | Down | 5.96E-06  | 1.29E-05  |
| Unigene23130  | Potri.003G137700.1 | 2.0662  | 4.8621   | -1.2346 | Down | 5.96E-06  | 1.29E-05  |
| Unigene12654  | Potri.003G115700.1 | 6.1006  | 14.356   | -1.2346 | Down | 3.74E-15  | 1.37E-14  |
| Unigene22144  | Potri.018G072200.1 | 8.9748  | 21.1212  | -1.2347 | Down | 6.17E-52  | 6.27E-51  |
| Unigene51481  | Potri.013G025000.1 | 32.0685 | 75.4698  | -1.2347 | Down | 3.41E-35  | 2.37E-34  |
| Unigene25033  | Potri.006G180100.1 | 52.7522 | 124.1436 | -1.2347 | Down | 1.19E-95  | 2.40E-94  |
| Unigene28585  | Potri.004G166600.1 | 20.9147 | 49.2191  | -1.2347 | Down | 1.86E-27  | 1.05E-26  |
| Unigene51235  | Potri.006G230000.2 | 20.6129 | 48.5131  | -1.2348 | Down | 1.28E-21  | 5.99E-21  |
| Unigene12255  | Potri.001G330800.1 | 6.7997  | 16.003   | -1.2348 | Down | 7.75E-14  | 2.69E-13  |
| Unigene44258  | Potri.006G153100.1 | 18.4946 | 43.5284  | -1.2349 | Down | 4.20E-37  | 3.07E-36  |
| Unigene49369  | Potri.005G117900.1 | 7.7212  | 18.1729  | -1.2349 | Down | 2.97E-09  | 8.11E-09  |
| Unigene49996  | Potri.012G085100.1 | 18.9939 | 44.7079  | -1.235  | Down | 1.70E-34  | 1.16E-33  |
| Unigene28844  | Potri.011G075600.2 | 14.77   | 34.7657  | -1.235  | Down | 1.70E-34  | 1.16E-33  |
| Unigene4799   | Potri.011G067800.2 | 14.5405 | 34.2255  | -1.235  | Down | 1.61E-12  | 5.26E-12  |
| Unigene17026  | Potri.006G180100.1 | 66.2823 | 156.0163 | -1.235  | Down | 1.27E-157 | 4.84E-156 |
| Unigene12488  | Potri.015G061000.1 | 8.3819  | 19.7314  | -1.2351 | Down | 1.88E-25  | 9.95E-25  |
| Unigene5934   | Potri.013G108600.2 | 31.8464 | 74.9654  | -1.2351 | Down | 2.09E-36  | 1.50E-35  |
| Unigene42352  | Potri.006G199500.1 | 6.3102  | 14.8541  | -1.2351 | Down | 5.31E-19  | 2.28E-18  |
| Unigene70674  | Potri.008G048400.1 | 57.4413 | 135.2232 | -1.2352 | Down | 2.57E-38  | 1.94E-37  |
| Unigene5196   | Potri.006G267300.1 | 1.8081  | 4.2566   | -1.2352 | Down | 1.37E-04  | 2.60E-04  |
| Unigene100842 | Potri.006G262200.4 | 1.4105  | 3.3206   | -1.2352 | Down | 1.37E-04  | 2.60E-04  |
| Unigene20714  | Potri.006G128700.1 | 19.027  | 44.7907  | -1.2352 | Down | 1.13E-28  | 6.61E-28  |
| Unigene39325  | Potri.006G032200.1 | 6.2197  | 14.6419  | -1.2352 | Down | 1.59E-41  | 1.29E-40  |
| Unigene40630  | Potri.017G035200.1 | 3.9186  | 9.2254   | -1.2353 | Down | 1.37E-04  | 2.60E-04  |
| Unigene28335  | Potri.006G224500.4 | 22.8884 | 53.8847  | -1.2353 | Down | 2.29E-27  | 1.29E-26  |
| Unigene36064  | Potri.001G005100.1 | 9.6142  | 22.6341  | -1.2353 | Down | 1.89E-14  | 6.73E-14  |
| Unigene24524  | Potri.015G085300.1 | 11.0655 | 26.0534  | -1.2354 | Down | 7.73E-23  | 3.77E-22  |
| Unigene12735  | Potri.005G148100.1 | 7.7471  | 18.2398  | -1.2354 | Down | 2.80E-29  | 1.66E-28  |
| Unigene1309   | Potri.003G090800.1 | 25.7929 | 60.7305  | -1.2354 | Down | 3.73E-49  | 3.58E-48  |
| Unigene45379  | Potri.002G217600.1 | 9.6608  | 22.7463  | -1.2354 | Down | 1.28E-37  | 9.49E-37  |
| Unigene43563  | Potri.001G378900.1 | 10.1115 | 23.8064  | -1.2354 | Down | 1.04E-35  | 7.34E-35  |
| Unigene19092  | Potri.013G073800.3 | 9.1769  | 21.6075  | -1.2355 | Down | 2.24E-16  | 8.65E-16  |
| Unigene32118  | Potri.004G015200.1 | 3.1717  | 7.468    | -1.2355 | Down | 5.65E-28  | 3.23E-27  |
| Unigene81902  | Potri.001G398800.2 | 53.99   | 127.1228 | -1.2355 | Down | 6.02E-46  | 5.40E-45  |
| Unigene91665  | Potri.013G032900.1 | 53.0137 | 124.8346 | -1.2356 | Down | 1.07E-74  | 1.62E-73  |
| Unigene1870   | Potri.002G170200.1 | 7.7248  | 18.1903  | -1.2356 | Down | 7.16E-10  | 2.03E-09  |
| Unigene37148  | Potri.018G110000.2 | 16.211  | 38.1759  | -1.2357 | Down | 4.62E-15  | 1.69E-14  |

|               |                    |         |          |         |      |           |           |
|---------------|--------------------|---------|----------|---------|------|-----------|-----------|
| Unigene44733  | Potri.005G074900.2 | 16.2423 | 38.2486  | -1.2357 | Down | 8.46E-32  | 5.40E-31  |
| Unigene33157  | Potri.010G210900.2 | 4.3862  | 10.3302  | -1.2358 | Down | 5.48E-17  | 2.17E-16  |
| Unigene11373  | Potri.008G160900.1 | 11.2836 | 26.5747  | -1.2358 | Down | 1.58E-37  | 1.17E-36  |
| Unigene79334  | Potri.001G172400.1 | 19.8828 | 46.8274  | -1.2358 | Down | 5.48E-17  | 2.17E-16  |
| Unigene40063  | Potri.007G050800.3 | 15.8095 | 37.2358  | -1.2359 | Down | 3.44E-29  | 2.04E-28  |
| Unigene1989   | Potri.016G095900.5 | 13.4045 | 31.5741  | -1.236  | Down | 7.88E-21  | 3.61E-20  |
| Unigene28897  | Potri.016G090100.1 | 3.9385  | 9.2767   | -1.236  | Down | 9.57E-14  | 3.30E-13  |
| Unigene112399 | Potri.015G133400.1 | 33.9087 | 79.8722  | -1.236  | Down | 6.95E-28  | 3.97E-27  |
| Unigene424    | Potri.009G026200.2 | 12.3875 | 29.1786  | -1.236  | Down | 3.29E-66  | 4.37E-65  |
| Unigene22570  | Potri.006G232200.1 | 9.2409  | 21.767   | -1.236  | Down | 6.95E-28  | 3.97E-27  |
| Unigene15410  | Potri.002G120600.1 | 8.1206  | 19.1288  | -1.2361 | Down | 1.53E-08  | 4.01E-08  |
| Unigene29845  | Potri.013G131100.6 | 10.0992 | 23.792   | -1.2362 | Down | 1.73E-10  | 5.07E-10  |
| Unigene41319  | Potri.001G272100.1 | 26.4806 | 62.387   | -1.2363 | Down | 2.58E-32  | 1.67E-31  |
| Unigene14545  | Potri.004G156900.4 | 31.0307 | 73.1101  | -1.2364 | Down | 2.85E-25  | 1.50E-24  |
| Unigene29174  | Potri.001G301600.6 | 13.8578 | 32.6505  | -1.2364 | Down | 3.47E-27  | 1.94E-26  |
| Unigene24056  | Potri.011G169900.1 | 24.8033 | 58.4419  | -1.2365 | Down | 6.37E-33  | 4.19E-32  |
| Unigene77897  | Potri.001G373700.3 | 47.0647 | 110.8974 | -1.2365 | Down | 9.65E-37  | 7.00E-36  |
| Unigene8081   | Potri.015G049100.5 | 14.2057 | 33.474   | -1.2366 | Down | 5.78E-24  | 2.93E-23  |
| Unigene18544  | Potri.010G077100.1 | 17.3034 | 40.7762  | -1.2367 | Down | 4.50E-43  | 3.79E-42  |
| Unigene43574  | Potri.008G050800.1 | 17.0047 | 40.0733  | -1.2367 | Down | 3.17E-60  | 3.78E-59  |
| Unigene93350  | Potri.009G147200.1 | 3.1688  | 7.468    | -1.2368 | Down | 3.33E-07  | 7.94E-07  |
| Unigene52682  | Potri.006G239900.2 | 3.2479  | 7.6543   | -1.2368 | Down | 3.68E-09  | 9.98E-09  |
| Unigene41413  | Potri.006G218800.1 | 2.5779  | 6.0755   | -1.2368 | Down | 4.85E-13  | 1.62E-12  |
| Unigene96192  | Potri.005G253000.1 | 2.252   | 5.3075   | -1.2368 | Down | 3.68E-09  | 9.98E-09  |
| Unigene29198  | Potri.004G194400.2 | 5.0899  | 11.9956  | -1.2368 | Down | 3.68E-09  | 9.98E-09  |
| Unigene23217  | Potri.003G151500.1 | 2.7158  | 6.4004   | -1.2368 | Down | 3.68E-09  | 9.98E-09  |
| Unigene8374   | Potri.003G116000.1 | 4.0783  | 9.6115   | -1.2368 | Down | 3.33E-07  | 7.94E-07  |
| Unigene42829  | Potri.002G235900.1 | 13.4446 | 31.6855  | -1.2368 | Down | 1.35E-104 | 3.06E-103 |
| Unigene22901  | Potri.002G149400.1 | 2.0049  | 4.725    | -1.2368 | Down | 3.33E-07  | 7.94E-07  |
| Unigene79561  | Potri.002G000200.2 | 41.7509 | 98.3959  | -1.2368 | Down | 3.90E-34  | 2.64E-33  |
| Unigene13263  | Potri.001G341400.1 | 14.1492 | 33.3481  | -1.2369 | Down | 8.14E-54  | 8.59E-53  |
| Unigene18662  | Potri.013G057200.4 | 23.7761 | 56.0424  | -1.237  | Down | 8.50E-47  | 7.76E-46  |
| Unigene18747  | Potri.003G005500.1 | 9.0559  | 21.3484  | -1.2372 | Down | 1.18E-13  | 4.05E-13  |
| Unigene8205   | Potri.007G050600.2 | 8.0673  | 19.019   | -1.2373 | Down | 1.01E-11  | 3.17E-11  |
| Unigene52925  | Potri.001G164000.1 | 26.3492 | 62.1212  | -1.2373 | Down | 1.80E-38  | 1.36E-37  |
| Unigene10646  | Potri.013G107000.1 | 8.1344  | 19.1788  | -1.2374 | Down | 3.22E-49  | 3.09E-48  |
| Unigene4661   | Potri.009G062200.3 | 12.1975 | 28.7581  | -1.2374 | Down | 8.85E-10  | 2.49E-09  |
| Unigene30490  | Potri.008G117600.2 | 22.4775 | 52.9953  | -1.2374 | Down | 4.06E-18  | 1.68E-17  |
| Unigene45178  | Potri.005G003400.2 | 5.0835  | 11.9856  | -1.2374 | Down | 5.52E-41  | 4.43E-40  |

|               |                     |         |          |         |      |           |           |
|---------------|---------------------|---------|----------|---------|------|-----------|-----------|
| Unigene27929  | Potri.009G044600.1  | 46.5019 | 109.644  | -1.2375 | Down | 1.53E-103 | 3.41E-102 |
| Unigene32235  | Potri.002G253200.1  | 8.2903  | 19.548   | -1.2375 | Down | 4.27E-75  | 6.50E-74  |
| Unigene23346  | Potri.001G176500.1  | 15.8049 | 37.2662  | -1.2375 | Down | 1.45E-22  | 6.99E-22  |
| Unigene24052  | Potri.013G099700.1  | 3.4804  | 8.2068   | -1.2376 | Down | 2.88E-14  | 1.02E-13  |
| Unigene29567  | Potri.008G020100.2  | 5.5066  | 12.9846  | -1.2376 | Down | 2.88E-14  | 1.02E-13  |
| Unigene107509 | Potri.005G178400.1  | 9.8352  | 23.1915  | -1.2376 | Down | 7.92E-08  | 1.98E-07  |
| Unigene7841   | Potri.003G196300.1  | 6.0231  | 14.2029  | -1.2376 | Down | 1.95E-31  | 1.23E-30  |
| Unigene96193  | Potri.001G209700.2  | 1.8685  | 4.4059   | -1.2376 | Down | 7.92E-08  | 1.98E-07  |
| Unigene45321  | Potri.016G102900.1  | 7.5872  | 17.8918  | -1.2377 | Down | 9.96E-19  | 4.23E-18  |
| Unigene112061 | Potri.014G123200.1  | 25.5947 | 60.3619  | -1.2378 | Down | 2.94E-21  | 1.37E-20  |
| Unigene11006  | Potri.011G043000.1  | 3.076   | 7.2542   | -1.2378 | Down | 8.33E-17  | 3.28E-16  |
| Unigene33663  | Potri.008G107300.1  | 9.2701  | 21.862   | -1.2378 | Down | 8.33E-17  | 3.28E-16  |
| Unigene27668  | Potri.014G189900.6  | 2.7937  | 6.5891   | -1.2379 | Down | 7.40E-06  | 1.59E-05  |
| Unigene41145  | Potri.008G129500.1  | 4.1569  | 9.8042   | -1.2379 | Down | 7.40E-06  | 1.59E-05  |
| Unigene11928  | Potri.008G036900.1  | 6.5718  | 15.5     | -1.2379 | Down | 7.03E-15  | 2.55E-14  |
| Unigene5230   | Potri.008G008100.1  | 10.953  | 25.8333  | -1.2379 | Down | 2.14E-10  | 6.23E-10  |
| Unigene48439  | Potri.007G080400.3  | 6.6033  | 15.5742  | -1.2379 | Down | 7.40E-06  | 1.59E-05  |
| Unigene19672  | Potri.005G197900.4  | 10.535  | 24.8473  | -1.2379 | Down | 2.14E-10  | 6.23E-10  |
| Unigene2781   | Potri.018G095300.3  | 43.0057 | 101.4349 | -1.238  | Down | 5.26E-124 | 1.47E-122 |
| Unigene31116  | Potri.016G137700.1  | 11.7507 | 27.7172  | -1.238  | Down | 2.04E-17  | 8.24E-17  |
| Unigene39792  | Potri.008G158400.1  | 12.2352 | 28.8591  | -1.238  | Down | 2.63E-26  | 1.43E-25  |
| Unigene592    | Potri.014G071700.1  | 19.3336 | 45.6048  | -1.2381 | Down | 2.80E-101 | 6.08E-100 |
| Unigene44412  | Potri.011G112800.1  | 7.5587  | 17.8305  | -1.2381 | Down | 6.00E-20  | 2.67E-19  |
| Unigene520    | Potri.010G028600.3  | 24.3612 | 57.47    | -1.2382 | Down | 1.91E-80  | 3.15E-79  |
| Unigene1050   | Potri.009G047300.1  | 15.9495 | 37.6251  | -1.2382 | Down | 1.15E-54  | 1.23E-53  |
| Unigene41348  | Potri.002G164100.1  | 5.5614  | 13.1196  | -1.2382 | Down | 1.89E-08  | 4.94E-08  |
| Unigene78621  | Potri.012G100800.3  | 15.6721 | 36.9771  | -1.2384 | Down | 1.46E-13  | 4.99E-13  |
| Unigene32418  | Potri.012G071900.1  | 6.7884  | 16.0164  | -1.2384 | Down | 4.45E-35  | 3.09E-34  |
| Unigene39430  | Potri.006G204300.1  | 14.3204 | 33.7867  | -1.2384 | Down | 1.46E-32  | 9.55E-32  |
| Unigene80432  | Potri.002G087200.2  | 11.8817 | 28.0324  | -1.2384 | Down | 5.17E-11  | 1.56E-10  |
| Unigene27272  | Potri.001G230000.6  | 9.4551  | 22.3095  | -1.2385 | Down | 3.90E-45  | 3.43E-44  |
| Unigene4751   | Potri.007G009600.1  | 18.2046 | 42.9566  | -1.2386 | Down | 1.08E-23  | 5.42E-23  |
| Unigene23787  | Potri.017G022900.1  | 4.9733  | 11.7366  | -1.2387 | Down | 1.74E-06  | 3.94E-06  |
| Unigene35095  | Potri.016G068800.1  | 15.8876 | 37.4917  | -1.2387 | Down | 7.38E-49  | 7.04E-48  |
| Unigene15020  | Potri.006G061600.1  | 29.0108 | 68.4637  | -1.2387 | Down | 7.29E-32  | 4.67E-31  |
| Unigene1130   | Potri.002G235400.1  | 3.7749  | 8.9085   | -1.2387 | Down | 1.25E-11  | 3.90E-11  |
| Unigene37285  | Potri.009G169800.1  | 14.835  | 35.0098  | -1.2388 | Down | 3.55E-14  | 1.25E-13  |
| Unigene41241  | Potri.007G079400.1  | 5.0698  | 11.9645  | -1.2388 | Down | 1.74E-06  | 3.94E-06  |
| Unigene14814  | Potri.002G243400.10 | 14.9198 | 35.2099  | -1.2388 | Down | 1.25E-11  | 3.90E-11  |

|               |                    |          |          |         |      |           |          |
|---------------|--------------------|----------|----------|---------|------|-----------|----------|
| Unigene107278 | Potri.001G372000.1 | 7.8329   | 18.4852  | -1.2388 | Down | 1.74E-06  | 3.94E-06 |
| Unigene19949  | Potri.001G197300.1 | 5.402    | 12.7484  | -1.2388 | Down | 1.74E-06  | 3.94E-06 |
| Unigene24300  | Potri.013G127500.1 | 8.187    | 19.3237  | -1.239  | Down | 4.14E-38  | 3.10E-37 |
| Unigene20325  | Potri.010G022300.1 | 10.1585  | 23.9775  | -1.239  | Down | 2.52E-17  | 1.01E-16 |
| Unigene42953  | Potri.006G262600.1 | 13.5379  | 31.9545  | -1.239  | Down | 2.05E-59  | 2.41E-58 |
| Unigene38765  | Potri.006G077600.1 | 8.6025   | 20.3048  | -1.239  | Down | 2.52E-17  | 1.01E-16 |
| Unigene40482  | Potri.004G218200.1 | 14.7588  | 34.8368  | -1.239  | Down | 8.67E-15  | 3.13E-14 |
| Unigene3721   | Potri.001G219700.3 | 7.8051   | 18.4235  | -1.2391 | Down | 2.25E-49  | 2.17E-48 |
| Unigene14197  | Potri.010G144500.1 | 15.1761  | 35.8251  | -1.2392 | Down | 1.20E-28  | 7.01E-28 |
| Unigene112549 | Potri.005G020400.1 | 10.395   | 24.5393  | -1.2392 | Down | 1.09E-09  | 3.06E-09 |
| Unigene44564  | Potri.016G102100.4 | 22.5365  | 53.2049  | -1.2393 | Down | 4.78E-43  | 4.02E-42 |
| Unigene24887  | Potri.003G218400.1 | 74.1497  | 175.0719 | -1.2394 | Down | 1.80E-100 | 3.88E-99 |
| Unigene20542  | Potri.006G091300.6 | 15.8097  | 37.3294  | -1.2395 | Down | 1.10E-21  | 5.17E-21 |
| Unigene11290  | Potri.015G129500.1 | 7.6228   | 18.0001  | -1.2396 | Down | 1.80E-45  | 1.60E-44 |
| Unigene42040  | Potri.015G002300.1 | 9.2931   | 21.9441  | -1.2396 | Down | 2.64E-10  | 7.66E-10 |
| Unigene21628  | Potri.005G190000.1 | 3.7818   | 8.93     | -1.2396 | Down | 2.64E-10  | 7.66E-10 |
| Unigene52047  | Potri.003G006200.2 | 7.4193   | 17.5194  | -1.2396 | Down | 2.64E-10  | 7.66E-10 |
| Unigene6426   | Potri.002G171500.1 | 15.6487  | 36.9519  | -1.2396 | Down | 3.71E-19  | 1.60E-18 |
| Unigene16279  | Potri.010G075000.3 | 39.1448  | 92.4402  | -1.2397 | Down | 2.53E-37  | 1.86E-36 |
| Unigene32349  | Potri.019G089000.1 | 38.0904  | 89.9552  | -1.2398 | Down | 5.39E-71  | 7.69E-70 |
| Unigene34397  | Potri.004G229700.4 | 28.767   | 67.9384  | -1.2398 | Down | 3.61E-44  | 3.11E-43 |
| Unigene7722   | Potri.004G159800.2 | 18.247   | 43.0928  | -1.2398 | Down | 4.97E-56  | 5.48E-55 |
| Unigene60261  | Potri.013G065000.1 | 1.9873   | 4.6938   | -1.2399 | Down | 1.71E-04  | 3.20E-04 |
| Unigene17346  | Potri.008G030600.1 | 2.1991   | 5.194    | -1.2399 | Down | 1.71E-04  | 3.20E-04 |
| Unigene6365   | Potri.005G260300.1 | 2.2659   | 5.3518   | -1.2399 | Down | 1.71E-04  | 3.20E-04 |
| Unigene22425  | Potri.001G230000.1 | 4.9733   | 11.7464  | -1.2399 | Down | 4.38E-14  | 1.53E-13 |
| Unigene40552  | Potri.019G130900.4 | 4.0919   | 9.6648   | -1.24   | Down | 1.71E-04  | 3.20E-04 |
| Unigene48042  | Potri.009G084500.1 | 2.1744   | 5.1358   | -1.24   | Down | 1.71E-04  | 3.20E-04 |
| Unigene22401  | Potri.006G115600.3 | 7.9012   | 18.6632  | -1.2401 | Down | 1.67E-33  | 1.12E-32 |
| Unigene972    | Potri.005G027700.2 | 12.59    | 29.7394  | -1.2401 | Down | 1.79E-43  | 1.52E-42 |
| Unigene49928  | Potri.004G217300.1 | 7.9675   | 18.8209  | -1.2401 | Down | 7.61E-18  | 3.12E-17 |
| Unigene70948  | Potri.004G044000.1 | 104.1047 | 245.9095 | -1.2401 | Down | 5.31E-69  | 7.36E-68 |
| Unigene11340  | Potri.017G033000.1 | 2.541    | 6.0027   | -1.2402 | Down | 1.07E-14  | 3.85E-14 |
| Unigene50135  | Potri.010G189700.1 | 5.7695   | 13.6313  | -1.2404 | Down | 2.61E-15  | 9.64E-15 |
| Unigene39702  | Potri.010G070600.2 | 3.1174   | 7.3653   | -1.2404 | Down | 2.34E-08  | 6.06E-08 |
| Unigene54015  | Potri.005G087600.4 | 10.1242  | 23.9198  | -1.2404 | Down | 2.34E-08  | 6.06E-08 |
| Unigene28399  | Potri.016G080500.2 | 18.2717  | 43.1719  | -1.2405 | Down | 4.58E-19  | 1.97E-18 |
| Unigene44388  | Potri.007G044300.1 | 26.7948  | 63.3122  | -1.2405 | Down | 8.20E-23  | 4.00E-22 |
| Unigene39228  | Potri.006G002100.1 | 6.0338   | 14.2569  | -1.2405 | Down | 3.75E-12  | 1.20E-11 |

|               |                    |         |          |         |      |          |          |
|---------------|--------------------|---------|----------|---------|------|----------|----------|
| Unigene40974  | Potri.006G188200.3 | 43.4354 | 102.6375 | -1.2406 | Down | 5.09E-34 | 3.44E-33 |
| Unigene3033   | Potri.008G098600.2 | 9.0048  | 21.2798  | -1.2407 | Down | 3.00E-53 | 3.13E-52 |
| Unigene1015   | Potri.019G019300.1 | 9.3626  | 22.1263  | -1.2408 | Down | 1.68E-31 | 1.06E-30 |
| Unigene40292  | Potri.011G156600.1 | 4.5345  | 10.7161  | -1.2408 | Down | 3.94E-05 | 7.89E-05 |
| Unigene18109  | Potri.011G049700.1 | 4.2773  | 10.1082  | -1.2408 | Down | 9.12E-13 | 3.00E-12 |
| Unigene52276  | Potri.005G247400.1 | 4.5523  | 10.7582  | -1.2408 | Down | 3.94E-05 | 7.89E-05 |
| Unigene41189  | Potri.002G004200.1 | 2.7596  | 6.5217   | -1.2408 | Down | 3.94E-05 | 7.89E-05 |
| Unigene32933  | Potri.003G196500.1 | 8.4293  | 19.9223  | -1.2409 | Down | 3.58E-40 | 2.81E-39 |
| Unigene1052   | Potri.015G066100.1 | 10.465  | 24.7359  | -1.241  | Down | 1.94E-49 | 1.87E-48 |
| Unigene54316  | Potri.008G109900.1 | 20.4466 | 48.3291  | -1.241  | Down | 1.67E-21 | 7.80E-21 |
| Unigene58349  | Potri.012G017500.1 | 8.5585  | 20.2302  | -1.2411 | Down | 1.35E-09 | 3.77E-09 |
| Unigene8381   | Potri.008G200600.1 | 7.2859  | 17.2222  | -1.2411 | Down | 9.38E-18 | 3.84E-17 |
| Unigene4959   | Potri.014G089200.1 | 21.8287 | 51.6015  | -1.2412 | Down | 1.84E-26 | 1.01E-25 |
| Unigene27702  | Potri.T149900.1    | 4.6544  | 11.0039  | -1.2413 | Down | 3.26E-10 | 9.42E-10 |
| Unigene48843  | Potri.004G189700.2 | 25.5207 | 60.3335  | -1.2413 | Down | 2.06E-31 | 1.30E-30 |
| Unigene18936  | Potri.016G066600.1 | 10.0458 | 23.7504  | -1.2414 | Down | 1.12E-27 | 6.35E-27 |
| Unigene46458  | Potri.016G029300.2 | 21.5708 | 50.9981  | -1.2414 | Down | 5.64E-19 | 2.42E-18 |
| Unigene49570  | Potri.014G174800.1 | 6.5662  | 15.5239  | -1.2414 | Down | 3.26E-10 | 9.42E-10 |
| Unigene662    | Potri.010G217800.1 | 29.6181 | 70.0257  | -1.2414 | Down | 5.93E-50 | 5.78E-49 |
| Unigene3385   | Potri.010G073600.1 | 15.5535 | 36.7718  | -1.2414 | Down | 1.32E-14 | 4.72E-14 |
| Unigene89136  | Potri.008G096700.1 | 19.2376 | 45.4818  | -1.2414 | Down | 2.49E-23 | 1.24E-22 |
| Unigene4992   | Potri.005G196100.2 | 12.9738 | 30.6728  | -1.2414 | Down | 3.26E-10 | 9.42E-10 |
| Unigene2201   | Potri.004G202700.1 | 1.2936  | 3.0584   | -1.2414 | Down | 9.19E-06 | 1.94E-05 |
| Unigene85007  | Potri.008G205400.1 | 19.5691 | 46.2696  | -1.2415 | Down | 1.39E-19 | 6.07E-19 |
| Unigene45776  | Potri.008G145600.1 | 14.841  | 35.0913  | -1.2415 | Down | 3.22E-15 | 1.18E-14 |
| Unigene7692   | Potri.005G148900.1 | 7.43    | 17.5676  | -1.2415 | Down | 1.39E-19 | 6.07E-19 |
| Unigene93759  | Potri.018G127900.1 | 4.4876  | 10.6114  | -1.2416 | Down | 7.88E-11 | 2.36E-10 |
| Unigene22427  | Potri.011G081200.1 | 9.6456  | 22.8078  | -1.2416 | Down | 2.25E-52 | 2.31E-51 |
| Unigene49965  | Potri.002G247100.2 | 9.7704  | 23.1048  | -1.2417 | Down | 8.36E-21 | 3.82E-20 |
| Unigene22548  | Potri.019G086800.1 | 3.9619  | 9.3696   | -1.2418 | Down | 2.16E-06 | 4.83E-06 |
| Unigene51195  | Potri.015G106000.3 | 10.62   | 25.1158  | -1.2418 | Down | 1.93E-16 | 7.47E-16 |
| Unigene48233  | Potri.009G099400.1 | 14.993  | 35.4575  | -1.2418 | Down | 1.91E-11 | 5.89E-11 |
| Unigene4565   | Potri.009G046800.2 | 4.4716  | 10.5751  | -1.2418 | Down | 2.16E-06 | 4.83E-06 |
| Unigene24200  | Potri.008G202300.1 | 3.9981  | 9.4553   | -1.2418 | Down | 2.06E-21 | 9.59E-21 |
| Unigene25405  | Potri.007G124000.3 | 19.5435 | 46.2194  | -1.2418 | Down | 2.06E-21 | 9.59E-21 |
| Unigene5468   | Potri.005G172200.1 | 6.9513  | 16.4394  | -1.2418 | Down | 2.16E-06 | 4.83E-06 |
| Unigene18555  | Potri.004G035700.1 | 3.5318  | 8.3526   | -1.2418 | Down | 2.16E-06 | 4.83E-06 |
| Unigene30280  | Potri.003G091100.1 | 7.2136  | 17.0598  | -1.2418 | Down | 2.16E-06 | 4.83E-06 |
| Unigene106774 | Potri.010G152700.1 | 1.4199  | 3.3581   | -1.2419 | Down | 2.16E-06 | 4.83E-06 |

|               |                    |          |          |         |      |           |           |
|---------------|--------------------|----------|----------|---------|------|-----------|-----------|
| Unigene18117  | Potri.003G137400.3 | 6.6917   | 15.8267  | -1.2419 | Down | 5.06E-22  | 2.40E-21  |
| Unigene51791  | Potri.002G241900.1 | 27.1269  | 64.1593  | -1.2419 | Down | 1.55E-32  | 1.01E-31  |
| Unigene18314  | Potri.016G041800.1 | 7.0392   | 16.6494  | -1.242  | Down | 4.63E-12  | 1.47E-11  |
| Unigene2594   | Potri.006G196600.1 | 6.549    | 15.4904  | -1.242  | Down | 3.40E-28  | 1.96E-27  |
| Unigene41300  | Potri.010G159100.1 | 26.8557  | 63.5309  | -1.2422 | Down | 2.92E-47  | 2.69E-46  |
| Unigene33867  | Potri.009G135500.2 | 23.8975  | 56.5376  | -1.2424 | Down | 3.21E-55  | 3.48E-54  |
| Unigene102292 | Potri.003G146300.2 | 3.1083   | 7.3542   | -1.2424 | Down | 1.21E-07  | 2.99E-07  |
| Unigene9937   | Potri.003G131800.1 | 13.7622  | 32.5639  | -1.2426 | Down | 1.63E-14  | 5.80E-14  |
| Unigene31021  | Potri.012G072600.1 | 24.2317  | 57.3408  | -1.2427 | Down | 1.77E-35  | 1.24E-34  |
| Unigene33366  | Potri.006G117400.3 | 35.572   | 84.1774  | -1.2427 | Down | 2.43E-56  | 2.70E-55  |
| Unigene34588  | Potri.004G117900.1 | 8.3774   | 19.824   | -1.2427 | Down | 6.23E-22  | 2.95E-21  |
| Unigene26553  | Potri.006G234400.1 | 14.7434  | 34.8905  | -1.2428 | Down | 9.71E-16  | 3.65E-15  |
| Unigene70456  | Potri.T005700.1    | 113.7636 | 269.2409 | -1.2429 | Down | 2.89E-75  | 4.42E-74  |
| Unigene25073  | Potri.004G184400.1 | 3.9847   | 9.4305   | -1.2429 | Down | 2.38E-16  | 9.18E-16  |
| Unigene46861  | Potri.010G241800.1 | 18.168   | 43.0026  | -1.243  | Down | 1.42E-17  | 5.79E-17  |
| Unigene1756   | Potri.013G129600.1 | 17.2025  | 40.7198  | -1.2431 | Down | 8.47E-27  | 4.68E-26  |
| Unigene32007  | Potri.010G216900.3 | 10.8879  | 25.7722  | -1.2431 | Down | 2.55E-51  | 2.56E-50  |
| Unigene3120   | Potri.005G045200.1 | 6.2842   | 14.8753  | -1.2431 | Down | 2.18E-35  | 1.52E-34  |
| Unigene45842  | Potri.002G015400.3 | 24.2182  | 57.3258  | -1.2431 | Down | 3.49E-18  | 1.45E-17  |
| Unigene31931  | Potri.017G079800.1 | 7.322    | 17.3334  | -1.2432 | Down | 1.48E-55  | 1.62E-54  |
| Unigene45188  | Potri.004G040500.2 | 11.8756  | 28.1116  | -1.2432 | Down | 8.57E-19  | 3.65E-18  |
| Unigene77880  | Potri.001G314500.1 | 104.6949 | 247.8375 | -1.2432 | Down | 1.29E-80  | 2.14E-79  |
| Unigene29878  | Potri.001G015000.1 | 27.4152  | 64.8991  | -1.2432 | Down | 2.10E-19  | 9.16E-19  |
| Unigene13743  | Potri.018G102800.1 | 20.8412  | 49.3401  | -1.2433 | Down | 5.64E-58  | 6.46E-57  |
| Unigene20458  | Potri.008G186900.1 | 6.428    | 15.2175  | -1.2433 | Down | 9.74E-11  | 2.90E-10  |
| Unigene39224  | Potri.002G204400.2 | 9.5447   | 22.5957  | -1.2433 | Down | 5.17E-20  | 2.30E-19  |
| Unigene16065  | Potri.015G128300.1 | 30.1312  | 71.3386  | -1.2434 | Down | 1.17E-31  | 7.45E-31  |
| Unigene28587  | Potri.012G133900.1 | 6.4695   | 15.3168  | -1.2434 | Down | 2.36E-11  | 7.25E-11  |
| Unigene29601  | Potri.004G196400.3 | 10.9293  | 25.8774  | -1.2435 | Down | 1.89E-22  | 9.10E-22  |
| Unigene28340  | Potri.001G178700.1 | 7.6013   | 17.9976  | -1.2435 | Down | 5.72E-12  | 1.81E-11  |
| Unigene11182  | Potri.006G246600.1 | 15.1598  | 35.8964  | -1.2436 | Down | 7.33E-69  | 1.01E-67  |
| Unigene36264  | Potri.005G250200.2 | 9.1346   | 21.6303  | -1.2436 | Down | 3.38E-13  | 1.14E-12  |
| Unigene39580  | Potri.003G024000.1 | 9.4841   | 22.4575  | -1.2436 | Down | 6.64E-36  | 4.71E-35  |
| Unigene9895   | Potri.002G183800.1 | 18.8514  | 44.6382  | -1.2436 | Down | 2.82E-24  | 1.44E-23  |
| Unigene91852  | Potri.T058900.1    | 79.2404  | 187.6522 | -1.2438 | Down | 4.82E-115 | 1.23E-113 |
| Unigene33240  | Potri.010G096900.1 | 15.6236  | 37.0007  | -1.2438 | Down | 1.57E-28  | 9.12E-28  |
| Unigene11775  | Potri.001G094400.1 | 15.3615  | 36.3782  | -1.2438 | Down | 1.53E-39  | 1.19E-38  |
| Unigene50610  | Potri.007G071800.2 | 8.0594   | 19.088   | -1.2439 | Down | 2.93E-16  | 1.13E-15  |
| Unigene56819  | Potri.009G137000.1 | 8.6498   | 20.4871  | -1.244  | Down | 2.04E-47  | 1.89E-46  |

|               |                    |         |          |         |      |           |           |
|---------------|--------------------|---------|----------|---------|------|-----------|-----------|
| Unigene30810  | Potri.008G118500.4 | 41.3419 | 97.9226  | -1.244  | Down | 2.82E-83  | 4.82E-82  |
| Unigene4464   | Potri.014G124100.1 | 25.5303 | 60.4729  | -1.2441 | Down | 1.06E-18  | 4.48E-18  |
| Unigene15939  | Potri.006G275400.8 | 19.6931 | 46.6486  | -1.2441 | Down | 6.37E-20  | 2.82E-19  |
| Unigene31724  | Potri.006G194100.2 | 24.1877 | 57.2946  | -1.2441 | Down | 1.24E-37  | 9.19E-37  |
| Unigene23177  | Potri.019G111600.2 | 14.3994 | 34.1107  | -1.2442 | Down | 9.46E-22  | 4.46E-21  |
| Unigene50529  | Potri.008G077100.1 | 18.8738 | 44.7106  | -1.2442 | Down | 1.76E-42  | 1.46E-41  |
| Unigene43875  | Potri.015G112700.1 | 24.7821 | 58.7113  | -1.2443 | Down | 2.11E-25  | 1.12E-24  |
| Unigene25616  | Potri.008G029200.1 | 22.9536 | 54.3765  | -1.2443 | Down | 5.73E-23  | 2.81E-22  |
| Unigene75205  | Potri.004G101700.2 | 76.132  | 180.3747 | -1.2444 | Down | 8.43E-56  | 9.27E-55  |
| Unigene6533   | Potri.018G055000.1 | 9.0046  | 21.3348  | -1.2445 | Down | 1.78E-31  | 1.12E-30  |
| Unigene28662  | Potri.005G106200.7 | 12.4332 | 29.4598  | -1.2445 | Down | 2.49E-36  | 1.79E-35  |
| Unigene1028   | Potri.004G101200.1 | 42.5909 | 100.9303 | -1.2447 | Down | 1.88E-120 | 5.08E-119 |
| Unigene46914  | Potri.T030000.1    | 32.6011 | 77.2713  | -1.245  | Down | 6.59E-43  | 5.53E-42  |
| Unigene38893  | Potri.018G018100.2 | 3.5767  | 8.4774   | -1.245  | Down | 1.14E-05  | 2.40E-05  |
| Unigene38669  | Potri.018G006400.4 | 13.8613 | 32.8541  | -1.245  | Down | 6.04E-15  | 2.20E-14  |
| Unigene49535  | Potri.016G118300.5 | 9.377   | 22.2253  | -1.245  | Down | 1.71E-12  | 5.58E-12  |
| Unigene92845  | Potri.016G085500.1 | 2.1898  | 5.1903   | -1.245  | Down | 4.91E-05  | 9.71E-05  |
| Unigene49479  | Potri.014G034600.4 | 2.2744  | 5.3907   | -1.245  | Down | 2.13E-04  | 3.94E-04  |
| Unigene15189  | Potri.011G156200.1 | 17.5941 | 41.7016  | -1.245  | Down | 1.02E-13  | 3.50E-13  |
| Unigene984    | Potri.011G034400.1 | 5.1747  | 12.2652  | -1.245  | Down | 8.84E-17  | 3.48E-16  |
| Unigene38638  | Potri.010G217600.1 | 1.6862  | 3.9967   | -1.245  | Down | 1.50E-07  | 3.68E-07  |
| Unigene100457 | Potri.010G134700.1 | 2.426   | 5.7501   | -1.245  | Down | 2.68E-06  | 5.95E-06  |
| Unigene32435  | Potri.010G031900.1 | 1.4383  | 3.409    | -1.245  | Down | 4.91E-05  | 9.71E-05  |
| Unigene2385   | Potri.009G094900.3 | 8.4189  | 19.9546  | -1.245  | Down | 1.45E-29  | 8.70E-29  |
| Unigene30791  | Potri.008G184900.1 | 2.9973  | 7.1042   | -1.245  | Down | 6.33E-07  | 1.48E-06  |
| Unigene32256  | Potri.007G087100.2 | 5.1913  | 12.3043  | -1.245  | Down | 2.66E-42  | 2.20E-41  |
| Unigene44751  | Potri.006G226700.1 | 4.3842  | 10.3915  | -1.245  | Down | 2.07E-09  | 5.70E-09  |
| Unigene47593  | Potri.006G038900.1 | 40.7015 | 96.4707  | -1.245  | Down | 2.66E-42  | 2.20E-41  |
| Unigene49802  | Potri.005G230600.1 | 3.357   | 7.9567   | -1.245  | Down | 6.33E-07  | 1.48E-06  |
| Unigene53948  | Potri.005G186500.1 | 6.4588  | 15.3086  | -1.245  | Down | 2.68E-06  | 5.95E-06  |
| Unigene39685  | Potri.005G164600.1 | 5.6652  | 13.4276  | -1.245  | Down | 8.84E-17  | 3.48E-16  |
| Unigene19393  | Potri.004G159800.2 | 3.9401  | 9.3388   | -1.245  | Down | 4.91E-05  | 9.71E-05  |
| Unigene16984  | Potri.004G068700.1 | 4.7932  | 11.3608  | -1.245  | Down | 3.59E-08  | 9.18E-08  |
| Unigene28964  | Potri.004G032700.1 | 1.5245  | 3.6134   | -1.245  | Down | 4.91E-05  | 9.71E-05  |
| Unigene20400  | Potri.003G137000.1 | 1.3005  | 3.0825   | -1.245  | Down | 2.13E-04  | 3.94E-04  |
| Unigene14205  | Potri.002G080800.3 | 21.519  | 51.0043  | -1.245  | Down | 5.31E-18  | 2.19E-17  |
| Unigene30534  | Potri.001G213900.1 | 3.956   | 9.3765   | -1.245  | Down | 1.14E-05  | 2.40E-05  |
| Unigene24880  | Potri.001G148300.1 | 2.8473  | 6.7487   | -1.245  | Down | 4.91E-05  | 9.71E-05  |
| Unigene114992 | Potri.001G004200.2 | 24.6443 | 58.4121  | -1.245  | Down | 4.28E-24  | 2.18E-23  |

|               |                     |         |         |         |      |          |          |
|---------------|---------------------|---------|---------|---------|------|----------|----------|
| Unigene50576  | Potri.006G047600.1  | 22.1694 | 52.5633 | -1.2455 | Down | 6.16E-35 | 4.26E-34 |
| Unigene52331  | Potri.012G057100.3  | 23.602  | 55.9641 | -1.2456 | Down | 7.22E-29 | 4.25E-28 |
| Unigene34194  | Potri.007G047400.2  | 8.4368  | 20.0056 | -1.2456 | Down | 4.80E-27 | 2.68E-26 |
| Unigene43320  | Potri.001G088000.2  | 7.7196  | 18.3049 | -1.2456 | Down | 1.19E-27 | 6.72E-27 |
| Unigene87629  | Potri.009G073300.2  | 20.3452 | 48.2474 | -1.2458 | Down | 8.69E-23 | 4.24E-22 |
| Unigene24560  | Potri.016G002100.1  | 18.5852 | 44.0786 | -1.2459 | Down | 3.94E-19 | 1.70E-18 |
| Unigene49919  | Potri.012G053600.1  | 9.3879  | 22.2648 | -1.2459 | Down | 9.67E-20 | 4.26E-19 |
| Unigene21591  | Potri.008G043600.3  | 5.088   | 12.0674 | -1.2459 | Down | 1.60E-18 | 6.76E-18 |
| Unigene7795   | Potri.004G222100.1  | 8.7241  | 20.6909 | -1.2459 | Down | 3.85E-54 | 4.09E-53 |
| Unigene45239  | Potri.001G152000.2  | 14.9399 | 35.4321 | -1.2459 | Down | 7.04E-38 | 5.25E-37 |
| Unigene13810  | Potri.006G106600.1  | 6.1896  | 14.6807 | -1.246  | Down | 3.06E-34 | 2.08E-33 |
| Unigene29232  | Potri.018G000500.2  | 19.3991 | 46.0156 | -1.2461 | Down | 5.43E-30 | 3.29E-29 |
| Unigene11450  | Potri.008G106900.2  | 7.4962  | 17.7805 | -1.2461 | Down | 1.09E-16 | 4.27E-16 |
| Unigene36092  | Potri.002G164100.1  | 9.3626  | 22.2076 | -1.2461 | Down | 1.09E-16 | 4.27E-16 |
| Unigene21362  | Potri.001G057200.1  | 12.003  | 28.4703 | -1.2461 | Down | 5.90E-92 | 1.13E-90 |
| Unigene302    | Potri.014G097600.2  | 3.1639  | 7.5054  | -1.2462 | Down | 7.46E-15 | 2.70E-14 |
| Unigene8652   | Potri.010G213700.1  | 14.8925 | 35.3277 | -1.2462 | Down | 7.46E-15 | 2.70E-14 |
| Unigene33365  | Potri.001G334200.1  | 24.3676 | 57.8022 | -1.2462 | Down | 2.20E-29 | 1.31E-28 |
| Unigene7312   | Potri.011G097500.1  | 7.7274  | 18.3315 | -1.2463 | Down | 3.05E-14 | 1.08E-13 |
| Unigene633    | Potri.009G111000.1  | 9.7621  | 23.1587 | -1.2463 | Down | 5.31E-39 | 4.07E-38 |
| Unigene45714  | Potri.009G020500.1  | 5.0808  | 12.0529 | -1.2463 | Down | 5.91E-27 | 3.28E-26 |
| Unigene48391  | Potri.008G117700.2  | 10.3122 | 24.4657 | -1.2464 | Down | 5.15E-13 | 1.72E-12 |
| Unigene35502  | Potri.001G137200.2  | 20.8081 | 49.367  | -1.2464 | Down | 1.60E-24 | 8.25E-24 |
| Unigene48862  | Potri.001G292800.1  | 3.9711  | 9.4224  | -1.2466 | Down | 8.72E-12 | 2.73E-11 |
| Unigene49122  | Potri.013G144000.1  | 7.517   | 17.8373 | -1.2467 | Down | 3.60E-11 | 1.09E-10 |
| Unigene28009  | Potri.010G136800.3  | 14.4511 | 34.2942 | -1.2468 | Down | 1.19E-19 | 5.24E-19 |
| Unigene28598  | Potri.002G179800.10 | 3.3579  | 7.9686  | -1.2468 | Down | 1.49E-10 | 4.37E-10 |
| Unigene24975  | Potri.014G195700.1  | 4.6879  | 11.126  | -1.2469 | Down | 6.15E-10 | 1.75E-09 |
| Unigene5304   | Potri.014G036400.1  | 29.3172 | 69.5814 | -1.247  | Down | 2.95E-26 | 1.60E-25 |
| Unigene26175  | Potri.018G004000.1  | 5.5004  | 13.0556 | -1.2471 | Down | 2.55E-09 | 7.02E-09 |
| Unigene22300  | Potri.014G014700.2  | 3.8073  | 9.0369  | -1.2471 | Down | 7.58E-33 | 4.98E-32 |
| Unigene32631  | Potri.010G194600.3  | 15.8353 | 37.5862 | -1.2471 | Down | 7.58E-33 | 4.98E-32 |
| Unigene119473 | Potri.013G136700.1  | 2.583   | 6.1315  | -1.2472 | Down | 1.06E-08 | 2.81E-08 |
| Unigene41883  | Potri.008G088600.3  | 6.342   | 15.055  | -1.2472 | Down | 1.06E-08 | 2.81E-08 |
| Unigene29202  | Potri.005G171900.1  | 5.4204  | 12.8672 | -1.2472 | Down | 1.06E-08 | 2.81E-08 |
| Unigene113093 | Potri.002G076700.5  | 8.8027  | 20.8963 | -1.2472 | Down | 1.06E-08 | 2.81E-08 |
| Unigene44811  | Potri.016G119500.1  | 4.3078  | 10.2269 | -1.2473 | Down | 5.36E-22 | 2.54E-21 |
| Unigene38685  | Potri.005G100100.1  | 1.7877  | 4.2438  | -1.2473 | Down | 1.06E-08 | 2.81E-08 |
| Unigene28328  | Potri.016G064800.13 | 5.6737  | 13.4705 | -1.2474 | Down | 4.44E-08 | 1.13E-07 |



|               |                     |         |          |         |      |           |           |
|---------------|---------------------|---------|----------|---------|------|-----------|-----------|
| Unigene74809  | Potri.014G195700.1  | 18.5638 | 44.0741  | -1.2474 | Down | 9.19E-15  | 3.32E-14  |
| Unigene11388  | Potri.006G279700.1  | 6.5397  | 15.5256  | -1.2474 | Down | 2.12E-76  | 3.29E-75  |
| Unigene40373  | Potri.005G252600.11 | 6.4146  | 15.2294  | -1.2474 | Down | 4.44E-08  | 1.13E-07  |
| Unigene3259   | Potri.005G154000.1  | 11.198  | 26.5854  | -1.2474 | Down | 3.49E-35  | 2.43E-34  |
| Unigene21587  | Potri.001G214500.1  | 22.3944 | 53.1685  | -1.2474 | Down | 2.58E-113 | 6.47E-112 |
| Unigene36721  | Potri.014G131000.1  | 12.7214 | 30.2054  | -1.2475 | Down | 3.77E-14  | 1.32E-13  |
| Unigene86292  | Potri.013G039600.6  | 32.9479 | 78.2272  | -1.2475 | Down | 5.71E-34  | 3.85E-33  |
| Unigene13042  | Potri.003G159800.1  | 6.3002  | 14.9587  | -1.2475 | Down | 6.07E-40  | 4.75E-39  |
| Unigene48083  | Potri.008G087800.1  | 27.2574 | 64.7214  | -1.2476 | Down | 3.60E-20  | 1.61E-19  |
| Unigene6808   | Potri.001G148600.3  | 15.7051 | 37.291   | -1.2476 | Down | 3.60E-20  | 1.61E-19  |
| Unigene54235  | Potri.013G025000.1  | 43.1183 | 102.3919 | -1.2477 | Down | 6.52E-37  | 4.75E-36  |
| Unigene80699  | Potri.010G098500.1  | 14.6214 | 34.72    | -1.2477 | Down | 1.55E-13  | 5.28E-13  |
| Unigene34445  | Potri.010G033900.2  | 3.8681  | 9.1852   | -1.2477 | Down | 1.55E-13  | 5.28E-13  |
| Unigene50268  | Potri.009G050200.1  | 4.0796  | 9.6875   | -1.2477 | Down | 1.86E-07  | 4.53E-07  |
| Unigene13768  | Potri.004G210100.5  | 4.1345  | 9.8188   | -1.2478 | Down | 6.35E-13  | 2.11E-12  |
| Unigene24216  | Potri.001G399900.1  | 9.1769  | 21.7936  | -1.2478 | Down | 4.94E-47  | 4.54E-46  |
| Unigene52998  | Potri.016G118300.5  | 5.4164  | 12.8646  | -1.248  | Down | 7.84E-07  | 1.82E-06  |
| Unigene48068  | Potri.006G215800.1  | 9.2985  | 22.0848  | -1.248  | Down | 2.61E-12  | 8.41E-12  |
| Unigene12201  | Potri.010G090200.2  | 11.5339 | 27.3957  | -1.2481 | Down | 1.62E-22  | 7.85E-22  |
| Unigene22795  | Potri.005G236200.1  | 32.7352 | 77.758   | -1.2481 | Down | 1.17E-57  | 1.34E-56  |
| Unigene54232  | Potri.005G097500.8  | 5.8523  | 13.9015  | -1.2482 | Down | 6.60E-22  | 3.13E-21  |
| Unigene27739  | Potri.018G067100.1  | 3.8181  | 9.0707   | -1.2484 | Down | 3.32E-06  | 7.34E-06  |
| Unigene23332  | Potri.010G142200.1  | 34.6353 | 82.284   | -1.2484 | Down | 8.91E-59  | 1.04E-57  |
| Unigene26806  | Potri.007G121400.1  | 3.0055  | 7.1403   | -1.2484 | Down | 3.32E-06  | 7.34E-06  |
| Unigene104078 | Potri.006G208300.2  | 2.892   | 6.8706   | -1.2484 | Down | 3.32E-06  | 7.34E-06  |
| Unigene63381  | Potri.004G007600.2  | 3.7932  | 9.0115   | -1.2484 | Down | 4.44E-11  | 1.35E-10  |
| Unigene41676  | Potri.007G051000.1  | 5.1667  | 12.2767  | -1.2486 | Down | 1.84E-10  | 5.38E-10  |
| Unigene21093  | Potri.014G009200.1  | 7.2438  | 17.2132  | -1.2487 | Down | 5.72E-32  | 3.67E-31  |
| Unigene11217  | Potri.005G243600.1  | 10.1467 | 24.1111  | -1.2487 | Down | 6.94E-41  | 5.56E-40  |
| Unigene20735  | Potri.015G144900.6  | 2.1865  | 5.1964   | -1.2489 | Down | 1.42E-05  | 2.96E-05  |
| Unigene11260  | Potri.014G170200.1  | 15.3148 | 36.3963  | -1.2489 | Down | 1.73E-109 | 4.15E-108 |
| Unigene7671   | Potri.006G108300.1  | 4.782   | 11.3655  | -1.249  | Down | 8.13E-22  | 3.84E-21  |
| Unigene32505  | Potri.005G183700.1  | 6.2137  | 14.7688  | -1.249  | Down | 1.50E-45  | 1.33E-44  |
| Unigene53     | Potri.013G055300.1  | 9.9472  | 23.6444  | -1.2491 | Down | 2.18E-129 | 6.43E-128 |
| Unigene49304  | Potri.005G250000.1  | 10.2205 | 24.2928  | -1.2491 | Down | 1.91E-13  | 6.49E-13  |
| Unigene22518  | Potri.010G051700.2  | 10.1429 | 24.1111  | -1.2492 | Down | 1.34E-20  | 6.11E-20  |
| Unigene16592  | Potri.005G185400.3  | 19.7842 | 47.0294  | -1.2492 | Down | 2.51E-28  | 1.45E-27  |
| Unigene38894  | Potri.001G129500.1  | 44.1674 | 104.9918 | -1.2492 | Down | 2.81E-47  | 2.59E-46  |
| Unigene4736   | Potri.014G134100.2  | 49.5215 | 117.727  | -1.2493 | Down | 1.61E-68  | 2.22E-67  |

|              |                    |         |          |         |      |          |          |
|--------------|--------------------|---------|----------|---------|------|----------|----------|
| Unigene7691  | Potri.010G052600.2 | 1.2649  | 3.0069   | -1.2493 | Down | 7.83E-13 | 2.59E-12 |
| Unigene43244 | Potri.006G163900.1 | 9.0627  | 21.5451  | -1.2493 | Down | 2.04E-16 | 7.91E-16 |
| Unigene72225 | Potri.002G082100.2 | 49.0688 | 116.6541 | -1.2494 | Down | 8.01E-35 | 5.52E-34 |
| Unigene21441 | Potri.018G060000.1 | 12.6966 | 30.187   | -1.2495 | Down | 1.46E-62 | 1.82E-61 |
| Unigene18959 | Potri.014G121400.1 | 2.3773  | 5.6524   | -1.2495 | Down | 6.10E-05 | 1.20E-04 |
| Unigene44785 | Potri.014G093400.1 | 2.4584  | 5.8451   | -1.2495 | Down | 6.10E-05 | 1.20E-04 |
| Unigene1899  | Potri.013G025600.2 | 4.3793  | 10.4124  | -1.2495 | Down | 1.32E-08 | 3.45E-08 |
| Unigene91020 | Potri.013G013600.4 | 2.6841  | 6.3818   | -1.2495 | Down | 6.10E-05 | 1.20E-04 |
| Unigene6156  | Potri.010G249600.1 | 2.5273  | 6.009    | -1.2495 | Down | 6.10E-05 | 1.20E-04 |
| Unigene17868 | Potri.008G198100.1 | 3.0994  | 7.3692   | -1.2495 | Down | 6.10E-05 | 1.20E-04 |
| Unigene53621 | Potri.008G093100.5 | 19.1449 | 45.5195  | -1.2495 | Down | 8.35E-16 | 3.15E-15 |
| Unigene7506  | Potri.005G139800.1 | 2.6577  | 6.319    | -1.2495 | Down | 6.10E-05 | 1.20E-04 |
| Unigene17168 | Potri.003G040000.1 | 2.8096  | 6.6801   | -1.2495 | Down | 6.10E-05 | 1.20E-04 |
| Unigene18553 | Potri.001G378000.7 | 2.2303  | 5.3028   | -1.2495 | Down | 6.10E-05 | 1.20E-04 |
| Unigene522   | Potri.001G247100.1 | 7.0936  | 16.8656  | -1.2495 | Down | 2.55E-87 | 4.62E-86 |
| Unigene35186 | Potri.005G165500.1 | 36.7257 | 87.3255  | -1.2496 | Down | 5.29E-33 | 3.49E-32 |
| Unigene10826 | Potri.014G191600.1 | 9.3321  | 22.1937  | -1.2499 | Down | 3.20E-41 | 2.59E-40 |
| Unigene7417  | Potri.009G124900.1 | 31.083  | 73.9256  | -1.2499 | Down | 3.99E-34 | 2.70E-33 |
| Unigene34953 | Potri.008G051300.1 | 6.6146  | 15.7311  | -1.2499 | Down | 3.50E-31 | 2.20E-30 |
| Unigene4684  | Potri.007G044300.1 | 28.7895 | 68.4709  | -1.2499 | Down | 4.07E-21 | 1.88E-20 |
| Unigene53720 | Potri.005G180800.3 | 7.783   | 18.5105  | -1.2499 | Down | 5.50E-08 | 1.39E-07 |
| Unigene2899  | Potri.013G123500.1 | 34.4711 | 81.9892  | -1.25   | Down | 1.98E-49 | 1.91E-48 |
| Unigene15234 | Potri.010G068200.2 | 17.0138 | 40.4672  | -1.25   | Down | 1.51E-17 | 6.12E-17 |
| Unigene31864 | Potri.006G066700.2 | 4.672   | 11.1121  | -1.25   | Down | 4.53E-24 | 2.30E-23 |
| Unigene15759 | Potri.003G039800.1 | 44.929  | 106.8561 | -1.25   | Down | 3.99E-34 | 2.70E-33 |
| Unigene89349 | Potri.010G194200.1 | 8.1362  | 19.3526  | -1.2501 | Down | 5.48E-11 | 1.65E-10 |
| Unigene39894 | Potri.014G151000.1 | 15.1881 | 36.1294  | -1.2502 | Down | 1.12E-44 | 9.79E-44 |
| Unigene39324 | Potri.008G094000.1 | 7.5533  | 17.9668  | -1.2502 | Down | 1.84E-23 | 9.16E-23 |
| Unigene53829 | Potri.005G120700.1 | 2.8151  | 6.6975   | -1.2504 | Down | 2.66E-04 | 4.87E-04 |
| Unigene75556 | Potri.018G086100.1 | 55.8649 | 132.9203 | -1.2505 | Down | 2.98E-42 | 2.46E-41 |
| Unigene9474  | Potri.010G094100.1 | 1.4675  | 3.4915   | -1.2505 | Down | 2.66E-04 | 4.87E-04 |
| Unigene52188 | Potri.008G197600.4 | 3.1191  | 7.421    | -1.2505 | Down | 2.66E-04 | 4.87E-04 |
| Unigene53682 | Potri.006G075200.1 | 3.6839  | 8.7647   | -1.2505 | Down | 2.66E-04 | 4.87E-04 |
| Unigene33645 | Potri.004G048700.2 | 43.1817 | 102.7369 | -1.2505 | Down | 4.47E-78 | 7.12E-77 |
| Unigene10987 | Potri.014G120100.1 | 12.4618 | 29.6539  | -1.2507 | Down | 4.02E-55 | 4.35E-54 |
| Unigene25248 | Potri.004G211500.3 | 11.9573 | 28.4565  | -1.2509 | Down | 4.56E-18 | 1.89E-17 |
| Unigene1181  | Potri.004G119500.2 | 5.4092  | 12.8732  | -1.2509 | Down | 2.54E-26 | 1.38E-25 |
| Unigene40826 | Potri.018G027600.1 | 4.1125  | 9.7887   | -1.2511 | Down | 9.72E-07 | 2.24E-06 |
| Unigene80674 | Potri.017G037000.1 | 6.4155  | 15.2704  | -1.2511 | Down | 9.72E-07 | 2.24E-06 |

|               |                    |         |          |         |      |           |           |
|---------------|--------------------|---------|----------|---------|------|-----------|-----------|
| Unigene12085  | Potri.016G082900.1 | 15.2751 | 36.358   | -1.2511 | Down | 1.86E-17  | 7.52E-17  |
| Unigene17661  | Potri.015G007800.1 | 4.3702  | 10.4022  | -1.2511 | Down | 9.72E-07  | 2.24E-06  |
| Unigene7551   | Potri.005G251700.1 | 4.329   | 10.3039  | -1.2511 | Down | 3.98E-12  | 1.27E-11  |
| Unigene84518  | Potri.016G075600.1 | 14.0375 | 33.4157  | -1.2512 | Down | 1.72E-14  | 6.14E-14  |
| Unigene82894  | Potri.008G138400.3 | 20.8314 | 49.587   | -1.2512 | Down | 8.30E-20  | 3.67E-19  |
| Unigene18150  | Potri.014G170400.5 | 64.9324 | 154.5743 | -1.2513 | Down | 1.78E-251 | 1.24E-249 |
| Unigene42969  | Potri.005G099800.1 | 7.5993  | 18.0905  | -1.2513 | Down | 8.69E-30  | 5.25E-29  |
| Unigene31354  | Potri.001G113800.1 | 34.3036 | 81.6615  | -1.2513 | Down | 8.69E-30  | 5.25E-29  |
| Unigene66635  | Potri.012G069700.2 | 6.6594  | 15.8539  | -1.2514 | Down | 1.12E-49  | 1.09E-48  |
| Unigene51746  | Potri.002G249100.1 | 2.1973  | 5.2314   | -1.2515 | Down | 1.64E-11  | 5.07E-11  |
| Unigene13483  | Potri.001G104900.2 | 3.7766  | 8.9914   | -1.2515 | Down | 1.64E-11  | 5.07E-11  |
| Unigene18052  | Potri.019G099000.1 | 34.4933 | 82.134   | -1.2517 | Down | 6.39E-38  | 4.77E-37  |
| Unigene17929  | Potri.010G046800.1 | 24.902  | 59.2991  | -1.2517 | Down | 2.64E-30  | 1.62E-29  |
| Unigene47194  | Potri.017G148800.1 | 6.8805  | 16.3862  | -1.2519 | Down | 4.12E-06  | 9.00E-06  |
| Unigene46688  | Potri.017G071100.1 | 5.8813  | 14.0065  | -1.2519 | Down | 4.12E-06  | 9.00E-06  |
| Unigene103551 | Potri.017G031700.1 | 3.625   | 8.6331   | -1.2519 | Down | 4.12E-06  | 9.00E-06  |
| Unigene14314  | Potri.010G215300.3 | 12.0117 | 28.6064  | -1.2519 | Down | 1.27E-15  | 4.74E-15  |
| Unigene63061  | Potri.007G119300.1 | 2.522   | 6.0063   | -1.2519 | Down | 4.12E-06  | 9.00E-06  |
| Unigene20166  | Potri.002G169700.2 | 2.6297  | 6.2626   | -1.2519 | Down | 4.12E-06  | 9.00E-06  |
| Unigene69412  | Potri.001G416100.2 | 2.0601  | 4.9063   | -1.2519 | Down | 1.63E-08  | 4.25E-08  |
| Unigene29153  | Potri.001G253400.1 | 7.5259  | 17.9233  | -1.2519 | Down | 1.27E-15  | 4.74E-15  |
| Unigene36417  | Potri.012G079800.1 | 14.429  | 34.3689  | -1.2521 | Down | 1.02E-19  | 4.50E-19  |
| Unigene23045  | Potri.016G133700.1 | 11.7763 | 28.0538  | -1.2523 | Down | 1.49E-32  | 9.74E-32  |
| Unigene72630  | Potri.014G135900.1 | 82.7077 | 197.0434 | -1.2524 | Down | 4.00E-58  | 4.60E-57  |
| Unigene114881 | Potri.001G225000.2 | 9.5261  | 22.6945  | -1.2524 | Down | 2.80E-10  | 8.12E-10  |
| Unigene20832  | Potri.006G187300.1 | 17.5109 | 41.719   | -1.2525 | Down | 9.36E-17  | 3.68E-16  |
| Unigene62794  | Potri.001G166900.1 | 3.1901  | 7.6008   | -1.2525 | Down | 6.80E-08  | 1.71E-07  |
| Unigene9821   | Potri.017G111400.4 | 29.7655 | 70.9229  | -1.2526 | Down | 2.44E-31  | 1.54E-30  |
| Unigene50260  | Potri.014G125600.1 | 5.0974  | 12.1453  | -1.2526 | Down | 2.13E-14  | 7.55E-14  |
| Unigene2018   | Potri.011G049700.1 | 22.1344 | 52.7393  | -1.2526 | Down | 1.58E-50  | 1.56E-49  |
| Unigene50771  | Potri.001G183500.1 | 8.6173  | 20.5331  | -1.2526 | Down | 1.70E-18  | 7.14E-18  |
| Unigene1082   | Potri.014G016900.1 | 19.0748 | 45.4516  | -1.2527 | Down | 6.20E-90  | 1.16E-88  |
| Unigene26211  | Potri.004G121200.1 | 7.9064  | 18.8399  | -1.2527 | Down | 4.91E-12  | 1.56E-11  |
| Unigene17977  | Potri.016G013500.1 | 13.8844 | 33.0862  | -1.2528 | Down | 3.82E-16  | 1.46E-15  |
| Unigene29555  | Potri.005G118600.3 | 15.5954 | 37.1655  | -1.2528 | Down | 2.16E-28  | 1.25E-27  |
| Unigene4664   | Potri.014G141800.4 | 3.1561  | 7.5218   | -1.2529 | Down | 1.76E-05  | 3.63E-05  |
| Unigene15621  | Potri.014G035800.3 | 18.013  | 42.9296  | -1.2529 | Down | 8.72E-14  | 3.01E-13  |
| Unigene22489  | Potri.012G073600.3 | 4.0357  | 9.6181   | -1.2529 | Down | 1.76E-05  | 3.63E-05  |
| Unigene29283  | Potri.006G121000.1 | 16.6336 | 39.6422  | -1.2529 | Down | 4.00E-30  | 2.44E-29  |

|               |                    |         |         |         |      |          |          |
|---------------|--------------------|---------|---------|---------|------|----------|----------|
| Unigene11415  | Potri.005G182100.1 | 2.8017  | 6.6772  | -1.2529 | Down | 8.72E-14 | 3.01E-13 |
| Unigene39334  | Potri.004G095300.2 | 17.9504 | 42.7805 | -1.2529 | Down | 1.50E-58 | 1.74E-57 |
| Unigene39645  | Potri.001G234300.4 | 8.296   | 19.7709 | -1.2529 | Down | 6.22E-65 | 8.06E-64 |
| Unigene102603 | Potri.012G133100.1 | 3.0695  | 7.3155  | -1.253  | Down | 1.76E-05 | 3.63E-05 |
| Unigene66453  | Potri.011G155400.4 | 1.7167  | 4.0914  | -1.253  | Down | 1.76E-05 | 3.63E-05 |
| Unigene373    | Potri.001G412100.1 | 5.1982  | 12.3893 | -1.253  | Down | 7.44E-32 | 4.76E-31 |
| Unigene45136  | Potri.016G051800.1 | 4.0802  | 9.7254  | -1.2531 | Down | 1.56E-15 | 5.82E-15 |
| Unigene29811  | Potri.009G032700.1 | 22.6653 | 54.0289 | -1.2532 | Down | 2.82E-17 | 1.13E-16 |
| Unigene40220  | Potri.006G245800.1 | 9.3989  | 22.4048 | -1.2532 | Down | 2.82E-17 | 1.13E-16 |
| Unigene23562  | Potri.006G166400.2 | 11.4263 | 27.2382 | -1.2533 | Down | 4.23E-23 | 2.08E-22 |
| Unigene11035  | Potri.002G205600.1 | 7.8582  | 18.7327 | -1.2533 | Down | 6.56E-29 | 3.86E-28 |
| Unigene39221  | Potri.003G100000.1 | 1.9742  | 4.7064  | -1.2534 | Down | 2.85E-07 | 6.86E-07 |
| Unigene49990  | Potri.002G224300.1 | 2.3626  | 5.6324  | -1.2534 | Down | 2.85E-07 | 6.86E-07 |
| Unigene34648  | Potri.014G058800.1 | 24.0541 | 57.3497 | -1.2535 | Down | 3.89E-49 | 3.73E-48 |
| Unigene29689  | Potri.011G006800.1 | 15.7975 | 37.6638 | -1.2535 | Down | 6.40E-15 | 2.32E-14 |
| Unigene69675  | Potri.008G117000.1 | 4.4611  | 10.636  | -1.2535 | Down | 6.40E-15 | 2.32E-14 |
| Unigene43841  | Potri.001G357600.1 | 13.051  | 31.1165 | -1.2535 | Down | 1.72E-22 | 8.29E-22 |
| Unigene22692  | Potri.008G083300.7 | 3.134   | 7.4725  | -1.2536 | Down | 4.82E-09 | 1.30E-08 |
| Unigene19733  | Potri.013G105700.1 | 8.6342  | 20.5887 | -1.2537 | Down | 8.36E-11 | 2.50E-10 |
| Unigene43719  | Potri.006G198300.1 | 10.7781 | 25.7029 | -1.2538 | Down | 1.47E-12 | 4.80E-12 |
| Unigene46473  | Potri.004G160400.1 | 15.6588 | 37.3419 | -1.2538 | Down | 1.47E-12 | 4.80E-12 |
| Unigene19585  | Potri.004G163800.1 | 8.3337  | 19.8747 | -1.2539 | Down | 2.62E-14 | 9.26E-14 |
| Unigene33407  | Potri.003G180800.1 | 8.8519  | 21.1118 | -1.254  | Down | 8.53E-18 | 3.49E-17 |
| Unigene27752  | Potri.005G072100.1 | 13.3874 | 31.9305 | -1.2541 | Down | 2.84E-21 | 1.32E-20 |
| Unigene34250  | Potri.013G083500.1 | 10.4548 | 24.9375 | -1.2542 | Down | 6.06E-30 | 3.67E-29 |
| Unigene7672   | Potri.014G124100.1 | 1.8323  | 4.371   | -1.2543 | Down | 1.20E-06 | 2.75E-06 |
| Unigene69909  | Potri.013G017400.1 | 2.2606  | 5.3928  | -1.2543 | Down | 7.59E-05 | 1.47E-04 |
| Unigene62470  | Potri.008G079900.2 | 4.824   | 11.508  | -1.2543 | Down | 2.01E-08 | 5.23E-08 |
| Unigene49186  | Potri.008G045400.4 | 4.3276  | 10.3238 | -1.2543 | Down | 1.20E-06 | 2.75E-06 |
| Unigene50401  | Potri.007G107400.1 | 6.189   | 14.7643 | -1.2543 | Down | 1.93E-15 | 7.16E-15 |
| Unigene43374  | Potri.003G129900.2 | 12.7364 | 30.3839 | -1.2543 | Down | 8.47E-33 | 5.56E-32 |
| Unigene7421   | Potri.001G143500.1 | 3.3367  | 7.96    | -1.2543 | Down | 7.59E-05 | 1.47E-04 |
| Unigene34787  | Potri.003G061800.1 | 7.5174  | 17.9336 | -1.2544 | Down | 4.45E-50 | 4.35E-49 |
| Unigene11635  | Potri.001G210900.1 | 5.2925  | 12.6258 | -1.2544 | Down | 3.48E-17 | 1.39E-16 |
| Unigene83991  | Potri.001G237800.3 | 27.9066 | 66.5842 | -1.2546 | Down | 5.37E-27 | 2.99E-26 |
| Unigene10709  | Potri.015G072900.1 | 7.8478  | 18.7263 | -1.2547 | Down | 1.24E-66 | 1.65E-65 |
| Unigene4148   | Potri.011G138100.1 | 11.1404 | 26.5827 | -1.2547 | Down | 2.58E-18 | 1.08E-17 |
| Unigene35006  | Potri.011G120000.3 | 7.1269  | 17.007  | -1.2548 | Down | 7.89E-15 | 2.85E-14 |
| Unigene50206  | Potri.002G151200.1 | 9.4575  | 22.5685 | -1.2548 | Down | 7.89E-15 | 2.85E-14 |

|               |                    |         |          |         |      |           |           |
|---------------|--------------------|---------|----------|---------|------|-----------|-----------|
| Unigene31863  | Potri.019G049400.1 | 7.2892  | 17.3963  | -1.2549 | Down | 5.12E-86  | 9.13E-85  |
| Unigene31869  | Potri.003G221100.2 | 3.4845  | 8.3156   | -1.2549 | Down | 1.18E-24  | 6.10E-24  |
| Unigene6079   | Potri.001G368600.1 | 5.8816  | 14.0367  | -1.2549 | Down | 2.50E-11  | 7.67E-11  |
| Unigene3782   | Potri.001G361100.1 | 11.8817 | 28.3565  | -1.2549 | Down | 2.50E-11  | 7.67E-11  |
| Unigene23446  | Potri.002G036300.3 | 3.9616  | 9.4553   | -1.255  | Down | 1.43E-09  | 3.99E-09  |
| Unigene38172  | Potri.014G083600.1 | 4.8733  | 11.6315  | -1.2551 | Down | 1.05E-17  | 4.29E-17  |
| Unigene22046  | Potri.010G077100.1 | 16.2106 | 38.6923  | -1.2551 | Down | 4.13E-107 | 9.61E-106 |
| Unigene1645   | Potri.T092000.1    | 2.8099  | 6.7074   | -1.2552 | Down | 8.41E-08  | 2.10E-07  |
| Unigene78534  | Potri.008G148000.3 | 18.2563 | 43.5764  | -1.2552 | Down | 5.81E-16  | 2.21E-15  |
| Unigene43581  | Potri.001G384300.1 | 6.2415  | 14.8983  | -1.2552 | Down | 2.60E-22  | 1.25E-21  |
| Unigene35920  | Potri.017G121100.3 | 9.2344  | 22.0433  | -1.2553 | Down | 8.41E-08  | 2.10E-07  |
| Unigene46355  | Potri.010G031900.1 | 19.4772 | 46.4941  | -1.2553 | Down | 1.42E-20  | 6.44E-20  |
| Unigene57694  | Potri.008G161100.4 | 3.1287  | 7.4686   | -1.2553 | Down | 8.41E-08  | 2.09E-07  |
| Unigene54170  | Potri.006G214000.1 | 3.752   | 8.9565   | -1.2553 | Down | 8.41E-08  | 2.10E-07  |
| Unigene54423  | Potri.006G196100.2 | 9.2344  | 22.0433  | -1.2553 | Down | 8.41E-08  | 2.10E-07  |
| Unigene23524  | Potri.012G106100.1 | 37.5769 | 89.7071  | -1.2554 | Down | 1.08E-68  | 1.49E-67  |
| Unigene4793   | Potri.003G095300.6 | 8.5701  | 20.4598  | -1.2554 | Down | 1.82E-12  | 5.89E-12  |
| Unigene2855   | Potri.016G138700.1 | 13.5952 | 32.4593  | -1.2555 | Down | 1.80E-35  | 1.26E-34  |
| Unigene40469  | Potri.002G059800.1 | 38.6718 | 92.3319  | -1.2555 | Down | 4.73E-40  | 3.71E-39  |
| Unigene104861 | Potri.014G014900.1 | 3.4675  | 8.2794   | -1.2556 | Down | 1.03E-10  | 3.07E-10  |
| Unigene41943  | Potri.012G097700.1 | 6.9351  | 16.5587  | -1.2556 | Down | 1.03E-10  | 3.07E-10  |
| Unigene49493  | Potri.004G098800.4 | 3.2703  | 7.8085   | -1.2556 | Down | 5.11E-06  | 1.11E-05  |
| Unigene51609  | Potri.004G018700.1 | 1.601   | 3.8227   | -1.2556 | Down | 5.11E-06  | 1.11E-05  |
| Unigene43650  | Potri.003G163000.2 | 5.1689  | 12.3415  | -1.2556 | Down | 2.38E-15  | 8.79E-15  |
| Unigene93802  | Potri.002G233300.1 | 2.133   | 5.093    | -1.2556 | Down | 5.11E-06  | 1.11E-05  |
| Unigene32687  | Potri.019G052600.1 | 15.436  | 36.8592  | -1.2557 | Down | 1.91E-39  | 1.48E-38  |
| Unigene24289  | Potri.014G035600.1 | 6.92    | 16.5235  | -1.2557 | Down | 1.35E-36  | 9.79E-36  |
| Unigene33956  | Potri.012G135000.3 | 42.2589 | 100.9145 | -1.2558 | Down | 1.58E-76  | 2.46E-75  |
| Unigene27035  | Potri.011G003400.1 | 34.2966 | 81.9029  | -1.2558 | Down | 1.51E-28  | 8.76E-28  |
| Unigene17787  | Potri.008G102800.1 | 14.8254 | 35.4037  | -1.2558 | Down | 4.30E-21  | 1.98E-20  |
| Unigene28398  | Potri.010G180700.2 | 4.467   | 10.6679  | -1.2559 | Down | 5.96E-09  | 1.60E-08  |
| Unigene2191   | Potri.008G172800.1 | 22.1581 | 52.9172  | -1.2559 | Down | 7.71E-39  | 5.87E-38  |
| Unigene105538 | Potri.001G378900.1 | 3.7053  | 8.8487   | -1.2559 | Down | 5.96E-09  | 1.60E-08  |
| Unigene31930  | Potri.018G048700.1 | 5.3011  | 12.6611  | -1.256  | Down | 1.58E-32  | 1.03E-31  |
| Unigene75606  | Potri.014G129000.1 | 17.8097 | 42.5384  | -1.2561 | Down | 9.73E-15  | 3.51E-14  |
| Unigene14129  | Potri.006G165300.2 | 15.0364 | 35.9155  | -1.2561 | Down | 1.29E-17  | 5.27E-17  |
| Unigene20557  | Potri.002G259900.2 | 19.7688 | 47.2176  | -1.2561 | Down | 6.10E-28  | 3.49E-27  |
| Unigene21843  | Potri.011G117600.2 | 4.7709  | 11.3962  | -1.2562 | Down | 3.30E-26  | 1.79E-25  |
| Unigene39448  | Potri.008G037100.1 | 7.6254  | 18.2139  | -1.2562 | Down | 1.29E-17  | 5.27E-17  |

|               |                    |         |          |         |      |           |           |
|---------------|--------------------|---------|----------|---------|------|-----------|-----------|
| Unigene41397  | Potri.015G059000.3 | 30.2147 | 72.1762  | -1.2563 | Down | 1.26E-37  | 9.32E-37  |
| Unigene37607  | Potri.015G043600.1 | 1.2691  | 3.0317   | -1.2563 | Down | 3.32E-04  | 6.01E-04  |
| Unigene85768  | Potri.010G150000.3 | 2.928   | 6.9947   | -1.2563 | Down | 3.32E-04  | 6.01E-04  |
| Unigene28162  | Potri.003G138400.8 | 2.5997  | 6.2104   | -1.2563 | Down | 3.32E-04  | 6.01E-04  |
| Unigene72349  | Potri.018G047700.8 | 4.1645  | 9.9488   | -1.2564 | Down | 3.32E-04  | 6.01E-04  |
| Unigene33696  | Potri.017G125300.1 | 1.6954  | 4.0503   | -1.2564 | Down | 3.32E-04  | 6.01E-04  |
| Unigene107076 | Potri.016G079700.1 | 1.6005  | 3.8236   | -1.2564 | Down | 3.32E-04  | 6.01E-04  |
| Unigene28946  | Potri.011G093200.1 | 5.9714  | 14.2653  | -1.2564 | Down | 6.73E-36  | 4.78E-35  |
| Unigene7346   | Potri.010G056200.2 | 2.3249  | 5.5541   | -1.2564 | Down | 3.32E-04  | 6.01E-04  |
| Unigene42122  | Potri.008G144400.3 | 28.1842 | 67.3328  | -1.2564 | Down | 2.46E-68  | 3.37E-67  |
| Unigene79973  | Potri.002G055700.3 | 17.508  | 41.8254  | -1.2564 | Down | 7.16E-16  | 2.71E-15  |
| Unigene20383  | Potri.001G321600.1 | 3.3059  | 7.8977   | -1.2564 | Down | 3.53E-07  | 8.42E-07  |
| Unigene108035 | Potri.001G246500.1 | 4.2053  | 10.0463  | -1.2564 | Down | 3.32E-04  | 6.01E-04  |
| Unigene34532  | Potri.001G156600.8 | 8.5789  | 20.4945  | -1.2564 | Down | 1.30E-21  | 6.12E-21  |
| Unigene61879  | Potri.001G067800.1 | 3.4732  | 8.2974   | -1.2564 | Down | 3.32E-04  | 6.01E-04  |
| Unigene41266  | Potri.017G051700.1 | 62.5575 | 149.4552 | -1.2565 | Down | 7.97E-81  | 1.32E-79  |
| Unigene2560   | Potri.010G190100.2 | 17.7184 | 42.3322  | -1.2565 | Down | 2.19E-52  | 2.25E-51  |
| Unigene27390  | Potri.008G130100.1 | 19.9879 | 47.7537  | -1.2565 | Down | 2.58E-31  | 1.63E-30  |
| Unigene3777   | Potri.009G136800.2 | 8.1351  | 19.4368  | -1.2566 | Down | 7.12E-20  | 3.16E-19  |
| Unigene43392  | Potri.014G132900.1 | 8.0147  | 19.1515  | -1.2567 | Down | 1.60E-66  | 2.14E-65  |
| Unigene40350  | Potri.001G084600.2 | 9.763   | 23.329   | -1.2567 | Down | 3.08E-11  | 9.42E-11  |
| Unigene11446  | Potri.014G135200.1 | 5.211   | 12.4523  | -1.2568 | Down | 3.91E-18  | 1.62E-17  |
| Unigene32774  | Potri.009G112000.2 | 3.3094  | 7.9084   | -1.2568 | Down | 3.91E-18  | 1.62E-17  |
| Unigene16314  | Potri.002G124900.1 | 40.2223 | 96.1146  | -1.2568 | Down | 1.55E-37  | 1.14E-36  |
| Unigene91719  | Potri.001G311000.3 | 73.7436 | 176.225  | -1.2568 | Down | 1.89E-108 | 4.46E-107 |
| Unigene39418  | Potri.018G091700.1 | 10.9266 | 26.1124  | -1.2569 | Down | 5.63E-29  | 3.32E-28  |
| Unigene94578  | Potri.006G070800.2 | 5.3147  | 12.701   | -1.2569 | Down | 2.49E-08  | 6.42E-08  |
| Unigene43187  | Potri.001G408800.1 | 9.4278  | 22.5311  | -1.2569 | Down | 5.90E-33  | 3.89E-32  |
| Unigene33116  | Potri.008G036800.1 | 9.475   | 22.6446  | -1.257  | Down | 2.90E-19  | 1.26E-18  |
| Unigene3246   | Potri.006G056300.1 | 26.186  | 62.5903  | -1.2571 | Down | 8.64E-70  | 1.21E-68  |
| Unigene415    | Potri.003G107700.1 | 3.9167  | 9.3616   | -1.2571 | Down | 2.15E-20  | 9.72E-20  |
| Unigene24702  | Potri.012G048500.1 | 4.9733  | 11.8881  | -1.2572 | Down | 2.19E-05  | 4.48E-05  |
| Unigene31630  | Potri.008G201700.1 | 3.8379  | 9.1741   | -1.2572 | Down | 2.19E-05  | 4.48E-05  |
| Unigene53221  | Potri.018G070600.1 | 14.0422 | 33.5665  | -1.2573 | Down | 1.64E-13  | 5.58E-13  |
| Unigene53691  | Potri.014G010100.1 | 14.6153 | 34.9365  | -1.2573 | Down | 1.64E-13  | 5.58E-13  |
| Unigene50680  | Potri.006G065600.1 | 3.9327  | 9.4008   | -1.2573 | Down | 1.77E-09  | 4.90E-09  |
| Unigene34169  | Potri.004G130000.5 | 5.4543  | 13.038   | -1.2573 | Down | 1.65E-25  | 8.74E-25  |
| Unigene43700  | Potri.002G145900.1 | 36.59   | 87.4683  | -1.2573 | Down | 1.64E-46  | 1.49E-45  |
| Unigene7526   | Potri.001G417400.1 | 1.7709  | 4.2332   | -1.2573 | Down | 2.19E-05  | 4.48E-05  |

|               |                    |         |          |         |      |          |          |
|---------------|--------------------|---------|----------|---------|------|----------|----------|
| Unigene37263  | Potri.011G078800.1 | 22.2743 | 53.2489  | -1.2574 | Down | 1.20E-22 | 5.80E-22 |
| Unigene19549  | Potri.017G101900.1 | 7.9616  | 19.0351  | -1.2575 | Down | 1.27E-10 | 3.76E-10 |
| Unigene5920   | Potri.016G118000.1 | 15.8079 | 37.7932  | -1.2575 | Down | 8.93E-24 | 4.49E-23 |
| Unigene83249  | Potri.006G038900.1 | 68.6145 | 164.0396 | -1.2575 | Down | 6.81E-63 | 8.52E-62 |
| Unigene41066  | Potri.013G044100.1 | 17.5195 | 41.89    | -1.2576 | Down | 6.52E-21 | 2.99E-20 |
| Unigene31892  | Potri.010G094400.4 | 14.9198 | 35.6732  | -1.2576 | Down | 1.42E-86 | 2.54E-85 |
| Unigene42862  | Potri.009G018100.2 | 6.551   | 15.6629  | -1.2576 | Down | 4.66E-43 | 3.92E-42 |
| Unigene7997   | Potri.015G103500.5 | 2.958   | 7.0732   | -1.2577 | Down | 1.49E-06 | 3.39E-06 |
| Unigene45529  | Potri.012G021400.1 | 21.5085 | 51.4292  | -1.2577 | Down | 1.46E-60 | 1.75E-59 |
| Unigene23252  | Potri.003G029700.1 | 2.655   | 6.3487   | -1.2577 | Down | 1.49E-06 | 3.39E-06 |
| Unigene61243  | Potri.013G034100.1 | 1.8447  | 4.4112   | -1.2578 | Down | 1.49E-06 | 3.39E-06 |
| Unigene18796  | Potri.010G219600.5 | 15.9723 | 38.1958  | -1.2578 | Down | 3.62E-23 | 1.79E-22 |
| Unigene43736  | Potri.005G182100.1 | 1.9758  | 4.7246   | -1.2578 | Down | 1.49E-06 | 3.39E-06 |
| Unigene10805  | Potri.013G113900.1 | 14.9503 | 35.754   | -1.2579 | Down | 5.33E-87 | 9.60E-86 |
| Unigene17792  | Potri.010G221500.3 | 9.9831  | 23.8747  | -1.2579 | Down | 6.72E-13 | 2.23E-12 |
| Unigene3025   | Potri.001G340800.1 | 21.2371 | 50.7874  | -1.2579 | Down | 7.67E-90 | 1.43E-88 |
| Unigene34513  | Potri.001G216500.2 | 16.676  | 39.8814  | -1.2579 | Down | 3.79E-53 | 3.95E-52 |
| Unigene1568   | Potri.012G143200.1 | 5.0716  | 12.1292  | -1.258  | Down | 3.57E-19 | 1.54E-18 |
| Unigene1317   | Potri.010G215700.1 | 19.4584 | 46.5362  | -1.258  | Down | 4.65E-48 | 4.36E-47 |
| Unigene28967  | Potri.005G193500.1 | 7.2591  | 17.3609  | -1.258  | Down | 9.44E-37 | 6.86E-36 |
| Unigene71190  | Potri.T044700.1    | 9.2326  | 22.082   | -1.2581 | Down | 1.04E-07 | 2.57E-07 |
| Unigene7499   | Potri.014G166800.1 | 11.7294 | 28.0538  | -1.2581 | Down | 1.52E-26 | 8.32E-26 |
| Unigene44342  | Potri.005G162300.1 | 18.4802 | 44.2037  | -1.2582 | Down | 8.52E-29 | 5.00E-28 |
| Unigene94929  | Potri.017G047600.1 | 3.126   | 7.4776   | -1.2583 | Down | 7.37E-09 | 1.97E-08 |
| Unigene38421  | Potri.014G102000.1 | 2.7035  | 6.4672   | -1.2583 | Down | 7.37E-09 | 1.97E-08 |
| Unigene110460 | Potri.002G138600.1 | 9.8244  | 23.5012  | -1.2583 | Down | 7.37E-09 | 1.97E-08 |
| Unigene44416  | Potri.001G407800.2 | 9.3646  | 22.4011  | -1.2583 | Down | 2.66E-16 | 1.02E-15 |
| Unigene3017   | Potri.013G104400.2 | 8.3801  | 20.0483  | -1.2584 | Down | 1.88E-52 | 1.93E-51 |
| Unigene14989  | Potri.012G002200.1 | 8.7764  | 20.9964  | -1.2584 | Down | 5.27E-10 | 1.51E-09 |
| Unigene37625  | Potri.014G121200.1 | 16.4622 | 39.3863  | -1.2585 | Down | 2.59E-29 | 1.54E-28 |
| Unigene14584  | Potri.003G221100.2 | 11.0758 | 26.4977  | -1.2585 | Down | 5.27E-10 | 1.51E-09 |
| Unigene40168  | Potri.001G289200.1 | 8.6616  | 20.7231  | -1.2585 | Down | 2.59E-29 | 1.54E-28 |
| Unigene13686  | Potri.010G189000.4 | 11.3858 | 27.2415  | -1.2586 | Down | 4.99E-40 | 3.91E-39 |
| Unigene50263  | Potri.009G086300.2 | 8.1017  | 19.3841  | -1.2586 | Down | 8.03E-21 | 3.67E-20 |
| Unigene938    | Potri.001G117100.1 | 8.0528  | 19.2676  | -1.2586 | Down | 5.98E-22 | 2.84E-21 |
| Unigene2346   | Potri.001G060800.1 | 3.3789  | 8.0843   | -1.2586 | Down | 3.81E-11 | 1.16E-10 |
| Unigene23528  | Potri.008G204000.1 | 5.5982  | 13.3951  | -1.2587 | Down | 2.76E-12 | 8.89E-12 |
| Unigene71728  | Potri.012G038300.1 | 19.0155 | 45.5038  | -1.2588 | Down | 1.48E-14 | 5.28E-14 |
| Unigene30775  | Potri.010G014200.1 | 12.2953 | 29.4224  | -1.2588 | Down | 1.40E-27 | 7.91E-27 |

|               |                    |         |          |         |      |          |          |
|---------------|--------------------|---------|----------|---------|------|----------|----------|
| Unigene15675  | Potri.004G189700.2 | 26.2105 | 62.7215  | -1.2588 | Down | 1.40E-27 | 7.92E-27 |
| Unigene52772  | Potri.004G000600.1 | 10.866  | 26.0022  | -1.2588 | Down | 1.48E-14 | 5.28E-14 |
| Unigene26902  | Potri.016G060300.1 | 30.0904 | 72.0126  | -1.2589 | Down | 1.62E-49 | 1.57E-48 |
| Unigene18502  | Potri.015G090700.1 | 4.446   | 10.6398  | -1.2589 | Down | 1.09E-15 | 4.08E-15 |
| Unigene111414 | Potri.009G088400.1 | 19.6144 | 46.9405  | -1.2589 | Down | 8.02E-17 | 3.16E-16 |
| Unigene47010  | Potri.001G005900.2 | 20.023  | 47.9168  | -1.2589 | Down | 7.87E-30 | 4.76E-29 |
| Unigene80624  | Potri.004G040900.3 | 22.3198 | 53.4189  | -1.259  | Down | 3.27E-20 | 1.47E-19 |
| Unigene31941  | Potri.014G047400.1 | 9.1177  | 21.8228  | -1.2591 | Down | 2.64E-89 | 4.91E-88 |
| Unigene94713  | Potri.T137500.1    | 2.1751  | 5.2076   | -1.2595 | Down | 9.45E-05 | 1.82E-04 |
| Unigene15479  | Potri.018G070000.5 | 43.5969 | 104.3772 | -1.2595 | Down | 2.33E-35 | 1.63E-34 |
| Unigene29580  | Potri.017G039100.1 | 2.3289  | 5.5757   | -1.2595 | Down | 2.19E-09 | 6.03E-09 |
| Unigene21044  | Potri.014G130600.1 | 9.3901  | 22.4812  | -1.2595 | Down | 4.45E-15 | 1.63E-14 |
| Unigene38536  | Potri.013G161200.6 | 2.6158  | 6.2626   | -1.2595 | Down | 9.45E-05 | 1.82E-04 |
| Unigene50240  | Potri.013G110800.1 | 4.7148  | 11.288   | -1.2595 | Down | 8.28E-13 | 2.73E-12 |
| Unigene21522  | Potri.013G040200.1 | 2.8846  | 6.9062   | -1.2595 | Down | 1.33E-19 | 5.84E-19 |
| Unigene74965  | Potri.011G131400.1 | 78.5344 | 188.0225 | -1.2595 | Down | 6.62E-59 | 7.72E-58 |
| Unigene43154  | Potri.008G060800.1 | 1.4574  | 3.4893   | -1.2595 | Down | 9.45E-05 | 1.82E-04 |
| Unigene8874   | Potri.006G119500.1 | 3.5336  | 8.46     | -1.2595 | Down | 9.45E-05 | 1.82E-04 |
| Unigene18745  | Potri.003G124000.1 | 2.7072  | 6.4815   | -1.2595 | Down | 6.34E-06 | 1.37E-05 |
| Unigene47641  | Potri.003G115800.2 | 3.3486  | 8.017    | -1.2595 | Down | 6.34E-06 | 1.37E-05 |
| Unigene117979 | Potri.003G063100.1 | 2.5367  | 6.0733   | -1.2595 | Down | 9.45E-05 | 1.82E-04 |
| Unigene66558  | Potri.001G465600.1 | 6.9937  | 16.7438  | -1.2595 | Down | 4.38E-07 | 1.04E-06 |
| Unigene53523  | Potri.001G289200.1 | 6.5184  | 15.6059  | -1.2595 | Down | 6.34E-06 | 1.37E-05 |
| Unigene57907  | Potri.001G176900.1 | 5.0236  | 12.0273  | -1.2595 | Down | 9.89E-21 | 4.51E-20 |
| Unigene50108  | Potri.001G078900.1 | 12.1989 | 29.2059  | -1.2595 | Down | 5.47E-32 | 3.51E-31 |
| Unigene37727  | Potri.012G058100.3 | 11.9802 | 28.6882  | -1.2598 | Down | 2.21E-31 | 1.40E-30 |
| Unigene13865  | Potri.004G057100.4 | 13.8457 | 33.1562  | -1.2598 | Down | 5.88E-84 | 1.02E-82 |
| Unigene82803  | Potri.014G075800.1 | 23.4535 | 56.168   | -1.2599 | Down | 2.23E-22 | 1.07E-21 |
| Unigene54405  | Potri.005G183400.2 | 20.5912 | 49.3124  | -1.2599 | Down | 1.66E-23 | 8.30E-23 |
| Unigene13688  | Potri.002G093400.4 | 12.2859 | 29.4247  | -1.26   | Down | 5.42E-19 | 2.33E-18 |
| Unigene115242 | Potri.014G129000.1 | 15.8359 | 37.9292  | -1.2601 | Down | 9.88E-17 | 3.88E-16 |
| Unigene16025  | Potri.003G129400.1 | 21.0824 | 50.4936  | -1.2601 | Down | 7.31E-18 | 3.00E-17 |
| Unigene18919  | Potri.014G145200.2 | 16.3328 | 39.1212  | -1.2602 | Down | 1.59E-28 | 9.23E-28 |
| Unigene23466  | Potri.012G136900.1 | 12.5962 | 30.1718  | -1.2602 | Down | 1.82E-14 | 6.49E-14 |
| Unigene21434  | Potri.001G172800.2 | 13.3944 | 32.0843  | -1.2602 | Down | 1.01E-63 | 1.29E-62 |
| Unigene34939  | Potri.010G228000.2 | 4.3756  | 10.4831  | -1.2605 | Down | 1.64E-19 | 7.16E-19 |
| Unigene30879  | Potri.010G039600.1 | 18.348  | 43.9566  | -1.2605 | Down | 1.22E-20 | 5.54E-20 |
| Unigene20334  | Potri.005G021700.1 | 6.9822  | 16.7273  | -1.2605 | Down | 4.70E-11 | 1.42E-10 |
| Unigene91361  | Potri.003G220400.2 | 59.5719 | 142.7201 | -1.2605 | Down | 8.31E-85 | 1.46E-83 |



|               |                    |         |          |         |      |           |           |
|---------------|--------------------|---------|----------|---------|------|-----------|-----------|
| Unigene80199  | Potri.001G269900.4 | 11.4768 | 27.4951  | -1.2605 | Down | 4.70E-11  | 1.42E-10  |
| Unigene10977  | Potri.018G069600.1 | 15.1603 | 36.3242  | -1.2606 | Down | 5.77E-82  | 9.71E-81  |
| Unigene25997  | Potri.009G079900.1 | 10.5446 | 25.2641  | -1.2606 | Down | 6.51E-10  | 1.85E-09  |
| Unigene53228  | Potri.007G051000.1 | 19.2236 | 46.0584  | -1.2606 | Down | 2.21E-18  | 9.25E-18  |
| Unigene48645  | Potri.018G101100.3 | 17.3765 | 41.6377  | -1.2608 | Down | 4.04E-16  | 1.54E-15  |
| Unigene84271  | Potri.005G218800.1 | 15.62   | 37.4288  | -1.2608 | Down | 4.04E-16  | 1.54E-15  |
| Unigene80798  | Potri.008G201400.5 | 15.9642 | 38.2563  | -1.2609 | Down | 5.48E-15  | 2.00E-14  |
| Unigene52766  | Potri.006G265700.1 | 15.4692 | 37.0701  | -1.2609 | Down | 5.48E-15  | 2.00E-14  |
| Unigene4956   | Potri.002G127900.1 | 14.9478 | 35.8205  | -1.2609 | Down | 5.48E-15  | 2.00E-14  |
| Unigene364    | Potri.010G255400.2 | 1.9996  | 4.7923   | -1.261  | Down | 1.29E-07  | 3.17E-07  |
| Unigene7630   | Potri.013G049300.1 | 4.8533  | 11.6326  | -1.2611 | Down | 1.02E-12  | 3.36E-12  |
| Unigene23573  | Potri.012G096500.1 | 8.5504  | 20.4931  | -1.2611 | Down | 6.67E-19  | 2.85E-18  |
| Unigene20830  | Potri.016G096600.1 | 33.6478 | 80.6514  | -1.2612 | Down | 4.24E-50  | 4.15E-49  |
| Unigene5933   | Potri.011G003400.1 | 21.8978 | 52.4891  | -1.2612 | Down | 7.91E-28  | 4.51E-27  |
| Unigene45616  | Potri.006G132000.8 | 24.1384 | 57.863   | -1.2613 | Down | 1.22E-106 | 2.83E-105 |
| Unigene17014  | Potri.003G070400.4 | 4.0161  | 9.6271   | -1.2613 | Down | 1.40E-11  | 4.36E-11  |
| Unigene51543  | Potri.001G406300.2 | 74.1442 | 177.7297 | -1.2613 | Down | 7.56E-63  | 9.45E-62  |
| Unigene80607  | Potri.019G120200.4 | 59.17   | 141.8586 | -1.2615 | Down | 3.95E-51  | 3.94E-50  |
| Unigene21627  | Potri.015G070200.1 | 2.1923  | 5.256    | -1.2615 | Down | 1.94E-10  | 5.68E-10  |
| Unigene87975  | Potri.001G193400.1 | 49.924  | 119.6901 | -1.2615 | Down | 3.97E-56  | 4.39E-55  |
| Unigene4385   | Potri.016G074700.1 | 59.8756 | 143.5564 | -1.2616 | Down | 9.30E-63  | 1.16E-61  |
| Unigene10928  | Potri.008G139900.1 | 9.4511  | 22.6608  | -1.2616 | Down | 6.90E-44  | 5.91E-43  |
| Unigene7756   | Potri.012G040200.1 | 6.1779  | 14.813   | -1.2617 | Down | 2.72E-18  | 1.14E-17  |
| Unigene12905  | Potri.008G041900.1 | 45.1566 | 108.2768 | -1.2617 | Down | 3.79E-67  | 5.11E-66  |
| Unigene29338  | Potri.005G120600.1 | 15.3267 | 36.7512  | -1.2617 | Down | 5.48E-30  | 3.32E-29  |
| Unigene48491  | Potri.004G052300.2 | 11.4834 | 27.5343  | -1.2617 | Down | 2.72E-18  | 1.14E-17  |
| Unigene32367  | Potri.003G173400.2 | 25.123  | 60.2401  | -1.2617 | Down | 1.20E-46  | 1.09E-45  |
| Unigene27411  | Potri.018G001600.1 | 4.9626  | 11.9003  | -1.2618 | Down | 2.72E-05  | 5.52E-05  |
| Unigene118879 | Potri.015G005000.1 | 8.9983  | 21.578   | -1.2618 | Down | 3.67E-17  | 1.47E-16  |
| Unigene12782  | Potri.008G159500.3 | 32.5142 | 77.9692  | -1.2618 | Down | 8.67E-64  | 1.10E-62  |
| Unigene8622   | Potri.004G017200.1 | 30.2297 | 72.491   | -1.2618 | Down | 9.42E-33  | 6.17E-32  |
| Unigene15397  | Potri.002G241800.1 | 27.4373 | 65.7948  | -1.2618 | Down | 7.30E-29  | 4.29E-28  |
| Unigene90827  | Potri.001G170200.1 | 17.5638 | 42.1182  | -1.2618 | Down | 5.72E-25  | 2.99E-24  |
| Unigene46811  | Potri.014G086000.1 | 48.478  | 116.2544 | -1.2619 | Down | 6.44E-55  | 6.94E-54  |
| Unigene16253  | Potri.010G093400.2 | 3.4645  | 8.308    | -1.2619 | Down | 3.67E-17  | 1.47E-16  |
| Unigene10786  | Potri.001G350200.3 | 9.1315  | 21.8985  | -1.2619 | Down | 3.80E-99  | 8.08E-98  |
| Unigene15251  | Potri.009G014700.2 | 25.5668 | 61.3155  | -1.262  | Down | 6.10E-20  | 2.71E-19  |
| Unigene18973  | Potri.006G114100.1 | 8.5961  | 20.6161  | -1.262  | Down | 4.97E-16  | 1.90E-15  |
| Unigene79200  | Potri.005G223500.1 | 22.5964 | 54.1917  | -1.262  | Down | 6.10E-20  | 2.71E-19  |

|              |                    |         |         |         |      |          |          |
|--------------|--------------------|---------|---------|---------|------|----------|----------|
| Unigene46540 | Potri.018G149500.3 | 6.3296  | 15.1811 | -1.2621 | Down | 4.20E-12 | 1.34E-11 |
| Unigene44215 | Potri.009G138200.1 | 12.9002 | 30.9407 | -1.2621 | Down | 2.22E-29 | 1.32E-28 |
| Unigene11519 | Potri.009G057800.5 | 18.3825 | 44.0885 | -1.2621 | Down | 3.44E-79 | 5.58E-78 |
| Unigene37350 | Potri.002G034100.2 | 9.6703  | 23.1933 | -1.2621 | Down | 4.20E-12 | 1.34E-11 |
| Unigene44396 | Potri.010G208000.2 | 23.0943 | 55.3955 | -1.2622 | Down | 6.56E-35 | 4.53E-34 |
| Unigene48474 | Potri.008G193300.4 | 15.3843 | 36.9016 | -1.2622 | Down | 6.76E-15 | 2.45E-14 |
| Unigene50567 | Potri.004G233300.1 | 9.9842  | 23.9488 | -1.2622 | Down | 6.76E-15 | 2.45E-14 |
| Unigene36616 | Potri.004G217800.1 | 15.0333 | 36.0597 | -1.2622 | Down | 6.76E-15 | 2.45E-14 |
| Unigene2388  | Potri.002G118800.1 | 13.1169 | 31.4619 | -1.2622 | Down | 3.81E-32 | 2.46E-31 |
| Unigene43294 | Potri.002G074500.1 | 11.2414 | 26.963  | -1.2622 | Down | 1.12E-42 | 9.37E-42 |
| Unigene4802  | Potri.008G155500.1 | 30.4053 | 72.9428 | -1.2624 | Down | 3.10E-23 | 1.54E-22 |
| Unigene24935 | Potri.006G068600.1 | 11.9041 | 28.5571 | -1.2624 | Down | 5.80E-11 | 1.75E-10 |
| Unigene13126 | Potri.017G085100.1 | 4.5002  | 10.7974 | -1.2626 | Down | 4.16E-22 | 1.98E-21 |
| Unigene38501 | Potri.010G188200.2 | 1.8908  | 4.537   | -1.2627 | Down | 4.14E-04 | 7.39E-04 |
| Unigene48826 | Potri.019G127500.1 | 3.3155  | 7.9559  | -1.2628 | Down | 5.42E-07 | 1.28E-06 |
| Unigene19283 | Potri.018G130500.5 | 6.6987  | 16.0741 | -1.2628 | Down | 5.42E-07 | 1.28E-06 |
| Unigene35914 | Potri.011G090700.1 | 7.7781  | 18.6642 | -1.2628 | Down | 5.42E-07 | 1.28E-06 |
| Unigene46866 | Potri.011G084400.2 | 14.6534 | 35.1621 | -1.2628 | Down | 1.26E-12 | 4.12E-12 |
| Unigene2528  | Potri.003G110300.2 | 8.9955  | 21.5855 | -1.2628 | Down | 1.60E-26 | 8.76E-26 |
| Unigene28192 | Potri.002G203400.1 | 16.5497 | 39.7124 | -1.2628 | Down | 8.07E-35 | 5.56E-34 |
| Unigene19673 | Potri.002G151400.2 | 2.4422  | 5.8603  | -1.2628 | Down | 4.14E-04 | 7.39E-04 |
| Unigene36866 | Potri.002G075400.1 | 8.0253  | 19.2575 | -1.2628 | Down | 1.26E-12 | 4.12E-12 |
| Unigene2824  | Potri.016G084700.4 | 5.2553  | 12.6125 | -1.263  | Down | 4.52E-17 | 1.80E-16 |
| Unigene11621 | Potri.002G114500.2 | 5.5816  | 13.3951 | -1.263  | Down | 2.13E-25 | 1.13E-24 |
| Unigene44392 | Potri.005G095700.1 | 15.4699 | 37.1296 | -1.2631 | Down | 2.85E-24 | 1.46E-23 |
| Unigene45306 | Potri.005G081600.2 | 14.3193 | 34.3689 | -1.2631 | Down | 6.04E-64 | 7.71E-63 |
| Unigene36689 | Potri.018G063700.4 | 21.1364 | 50.7338 | -1.2632 | Down | 1.01E-18 | 4.29E-18 |
| Unigene5616  | Potri.006G102000.3 | 6.1447  | 14.7501 | -1.2633 | Down | 1.13E-08 | 2.96E-08 |
| Unigene53950 | Potri.009G073800.1 | 18.6498 | 44.7733 | -1.2635 | Down | 1.37E-17 | 5.55E-17 |
| Unigene39662 | Potri.014G156400.1 | 5.0748  | 12.1844 | -1.2636 | Down | 3.06E-19 | 1.32E-18 |
| Unigene8506  | Potri.011G030100.1 | 1.9631  | 4.7135  | -1.2637 | Down | 7.87E-06 | 1.68E-05 |
| Unigene35122 | Potri.005G219100.1 | 7.952   | 19.0937 | -1.2637 | Down | 1.02E-29 | 6.14E-29 |
| Unigene47322 | Potri.002G020900.4 | 24.0795 | 57.8192 | -1.2637 | Down | 6.88E-21 | 3.15E-20 |
| Unigene23919 | Potri.013G005200.1 | 14.6062 | 35.0731 | -1.2638 | Down | 3.38E-46 | 3.04E-45 |
| Unigene28397 | Potri.008G069700.6 | 6.594   | 15.8344 | -1.2638 | Down | 1.55E-22 | 7.50E-22 |
| Unigene64579 | Potri.019G079300.1 | 3.1914  | 7.6646  | -1.264  | Down | 1.59E-07 | 3.89E-07 |
| Unigene70376 | Potri.018G122800.2 | 2.0579  | 4.9423  | -1.264  | Down | 1.59E-07 | 3.89E-07 |
| Unigene36917 | Potri.017G033400.1 | 3.3186  | 7.97    | -1.264  | Down | 1.14E-13 | 3.90E-13 |
| Unigene5051  | Potri.012G081600.1 | 7.2485  | 17.4082 | -1.264  | Down | 1.59E-07 | 3.89E-07 |

|               |                    |         |          |         |      |          |          |
|---------------|--------------------|---------|----------|---------|------|----------|----------|
| Unigene53125  | Potri.002G143000.1 | 7.8871  | 18.9419  | -1.264  | Down | 1.59E-07 | 3.89E-07 |
| Unigene22074  | Potri.011G116400.1 | 3.4344  | 8.2493   | -1.2642 | Down | 5.57E-17 | 2.21E-16 |
| Unigene83199  | Potri.009G028000.1 | 34.0865 | 81.8755  | -1.2642 | Down | 2.15E-32 | 1.40E-31 |
| Unigene42789  | Potri.008G037800.1 | 2.0443  | 4.9103   | -1.2642 | Down | 3.34E-09 | 9.09E-09 |
| Unigene109655 | Potri.002G248700.1 | 10.5337 | 25.3018  | -1.2642 | Down | 3.34E-09 | 9.09E-09 |
| Unigene18400  | Potri.018G021300.3 | 6.5952  | 15.8425  | -1.2643 | Down | 1.13E-35 | 7.98E-35 |
| Unigene42766  | Potri.013G094900.1 | 9.4991  | 22.82    | -1.2644 | Down | 3.60E-53 | 3.75E-52 |
| Unigene79049  | Potri.006G259700.2 | 31.083  | 74.6775  | -1.2645 | Down | 7.34E-27 | 4.07E-26 |
| Unigene83353  | Potri.001G169900.1 | 13.866  | 33.3134  | -1.2646 | Down | 3.41E-14 | 1.20E-13 |
| Unigene90584  | Potri.019G079500.1 | 50.2146 | 120.6595 | -1.2648 | Down | 2.78E-67 | 3.75E-66 |
| Unigene17069  | Potri.014G146900.3 | 34.1986 | 82.184   | -1.2649 | Down | 2.53E-50 | 2.49E-49 |
| Unigene45698  | Potri.007G104000.1 | 14.3499 | 34.4836  | -1.2649 | Down | 3.19E-37 | 2.34E-36 |
| Unigene32072  | Potri.001G470600.1 | 6.9247  | 16.6406  | -1.2649 | Down | 7.33E-39 | 5.59E-38 |
| Unigene72470  | Potri.001G052100.4 | 50.8139 | 122.1087 | -1.2649 | Down | 3.19E-37 | 2.34E-36 |
| Unigene20014  | Potri.012G063400.1 | 30.4965 | 73.2938  | -1.265  | Down | 1.85E-34 | 1.26E-33 |
| Unigene4663   | Potri.011G082100.2 | 7.096   | 17.0542  | -1.265  | Down | 2.29E-06 | 5.12E-06 |
| Unigene39283  | Potri.007G035000.1 | 2.1842  | 5.2494   | -1.265  | Down | 9.93E-10 | 2.79E-09 |
| Unigene79002  | Potri.005G000500.1 | 12.1224 | 29.1343  | -1.265  | Down | 2.14E-11 | 6.58E-11 |
| Unigene19204  | Potri.004G003800.1 | 61.9798 | 148.95   | -1.265  | Down | 1.40E-71 | 2.02E-70 |
| Unigene66516  | Potri.019G080900.1 | 2.8607  | 6.8753   | -1.2651 | Down | 1.18E-04 | 2.23E-04 |
| Unigene92039  | Potri.010G214500.1 | 2.1455  | 5.1565   | -1.2651 | Down | 1.18E-04 | 2.23E-04 |
| Unigene116563 | Potri.003G120600.1 | 18.0146 | 43.2955  | -1.2651 | Down | 2.56E-21 | 1.19E-20 |
| Unigene13578  | Potri.001G392900.1 | 1.8941  | 4.5522   | -1.2651 | Down | 2.29E-06 | 5.12E-06 |
| Unigene41167  | Potri.001G188800.4 | 2.7089  | 6.5105   | -1.2651 | Down | 1.18E-04 | 2.23E-04 |
| Unigene52041  | Potri.001G222600.4 | 18.1901 | 43.7226  | -1.2652 | Down | 1.29E-36 | 9.31E-36 |
| Unigene46852  | Potri.002G049900.8 | 18.9683 | 45.5992  | -1.2654 | Down | 1.71E-35 | 1.20E-34 |
| Unigene32662  | Potri.007G000700.1 | 3.3128  | 7.9643   | -1.2655 | Down | 3.09E-15 | 1.14E-14 |
| Unigene41365  | Potri.001G342600.1 | 13.9593 | 33.5602  | -1.2655 | Down | 6.31E-41 | 5.06E-40 |
| Unigene13035  | Potri.010G178600.1 | 21.6758 | 52.1159  | -1.2656 | Down | 2.23E-65 | 2.91E-64 |
| Unigene25822  | Potri.010G156300.2 | 20.6903 | 49.7458  | -1.2656 | Down | 1.09E-56 | 1.22E-55 |
| Unigene34306  | Potri.006G072900.1 | 4.0086  | 9.6381   | -1.2657 | Down | 6.40E-12 | 2.02E-11 |
| Unigene40880  | Potri.006G009200.1 | 19.9788 | 48.0375  | -1.2657 | Down | 4.33E-31 | 2.71E-30 |
| Unigene13476  | Potri.004G047700.1 | 3.9516  | 9.5012   | -1.2657 | Down | 6.40E-12 | 2.02E-11 |
| Unigene53947  | Potri.009G056400.1 | 16.3661 | 39.3651  | -1.2662 | Down | 6.25E-18 | 2.58E-17 |
| Unigene107851 | Potri.005G171800.1 | 7.9009  | 19.0038  | -1.2662 | Down | 6.71E-07 | 1.56E-06 |
| Unigene25891  | Potri.011G122200.1 | 9.6556  | 23.2276  | -1.2664 | Down | 8.83E-11 | 2.63E-10 |
| Unigene118349 | Potri.005G222900.3 | 6.3176  | 15.1977  | -1.2664 | Down | 8.83E-11 | 2.63E-10 |
| Unigene10589  | Potri.019G051500.1 | 13.5755 | 32.6594  | -1.2665 | Down | 1.26E-14 | 4.53E-14 |
| Unigene45647  | Potri.004G182900.2 | 19.1335 | 46.0335  | -1.2666 | Down | 1.08E-46 | 9.86E-46 |

|               |                    |         |          |         |      |          |          |
|---------------|--------------------|---------|----------|---------|------|----------|----------|
| Unigene77928  | Potri.004G175900.1 | 54.6741 | 131.5464 | -1.2666 | Down | 4.70E-45 | 4.12E-44 |
| Unigene88253  | Potri.014G055900.1 | 6.7817  | 16.3176  | -1.2667 | Down | 4.13E-09 | 1.12E-08 |
| Unigene15527  | Potri.012G071500.2 | 5.4496  | 13.1124  | -1.2667 | Down | 5.75E-13 | 1.91E-12 |
| Unigene118487 | Potri.005G162400.1 | 2.5089  | 6.0368   | -1.2667 | Down | 3.37E-05 | 6.79E-05 |
| Unigene105501 | Potri.005G152500.4 | 3.6809  | 8.8566   | -1.2667 | Down | 3.37E-05 | 6.79E-05 |
| Unigene34517  | Potri.004G224000.3 | 11.7479 | 28.2668  | -1.2667 | Down | 8.45E-17 | 3.33E-16 |
| Unigene68704  | Potri.004G085100.1 | 2.1153  | 5.0896   | -1.2667 | Down | 3.37E-05 | 6.79E-05 |
| Unigene34291  | Potri.011G001600.1 | 7.9962  | 19.2414  | -1.2668 | Down | 8.76E-23 | 4.27E-22 |
| Unigene107117 | Potri.001G418100.1 | 12.4543 | 29.9686  | -1.2668 | Down | 1.37E-26 | 7.51E-26 |
| Unigene24849  | Potri.004G223000.1 | 43.7815 | 105.3636 | -1.267  | Down | 2.16E-50 | 2.13E-49 |
| Unigene42899  | Potri.007G145000.1 | 4.2863  | 10.3165  | -1.2671 | Down | 1.73E-19 | 7.54E-19 |
| Unigene45016  | Potri.011G041400.1 | 2.3531  | 5.6637   | -1.2672 | Down | 1.97E-07 | 4.78E-07 |
| Unigene15451  | Potri.009G016700.1 | 8.7654  | 21.0972  | -1.2672 | Down | 1.97E-07 | 4.78E-07 |
| Unigene77247  | Potri.005G260300.1 | 13.1359 | 31.624   | -1.2675 | Down | 7.89E-12 | 2.48E-11 |
| Unigene5703   | Potri.001G189800.6 | 39.7603 | 95.7189  | -1.2675 | Down | 1.44E-40 | 1.15E-39 |
| Unigene38383  | Potri.010G087300.1 | 10.213  | 24.5895  | -1.2676 | Down | 3.45E-16 | 1.33E-15 |
| Unigene19241  | Potri.003G134000.2 | 17.1613 | 41.3172  | -1.2676 | Down | 1.68E-26 | 9.21E-26 |
| Unigene27985  | Potri.005G213400.3 | 15.9581 | 38.4245  | -1.2677 | Down | 1.08E-22 | 5.24E-22 |
| Unigene90965  | Potri.T150600.1    | 3.1626  | 7.6161   | -1.2679 | Down | 9.76E-06 | 2.06E-05 |
| Unigene43970  | Potri.003G220100.1 | 41.5221 | 99.9891  | -1.2679 | Down | 1.75E-61 | 2.14E-60 |
| Unigene60791  | Potri.017G111800.3 | 3.8743  | 9.3302   | -1.268  | Down | 5.81E-08 | 1.46E-07 |
| Unigene35005  | Potri.010G221000.3 | 11.2561 | 27.1072  | -1.268  | Down | 4.78E-21 | 2.20E-20 |
| Unigene6939   | Potri.008G113600.1 | 2.5162  | 6.0597   | -1.268  | Down | 9.76E-06 | 2.06E-05 |
| Unigene30803  | Potri.007G063100.2 | 14.0389 | 33.809   | -1.268  | Down | 1.56E-14 | 5.56E-14 |
| Unigene26309  | Potri.004G006000.2 | 10.097  | 24.3159  | -1.268  | Down | 2.36E-12 | 7.62E-12 |
| Unigene32782  | Potri.002G234700.1 | 14.4491 | 34.7967  | -1.268  | Down | 1.07E-57 | 1.22E-56 |
| Unigene70437  | Potri.017G043100.1 | 26.1097 | 62.8898  | -1.2682 | Down | 2.12E-19 | 9.25E-19 |
| Unigene33136  | Potri.015G140300.1 | 14.8731 | 35.8227  | -1.2682 | Down | 6.81E-26 | 3.66E-25 |
| Unigene72275  | Potri.013G161600.5 | 50.6984 | 122.1162 | -1.2682 | Down | 3.35E-37 | 2.46E-36 |
| Unigene3644   | Potri.005G156900.1 | 19.0084 | 45.788   | -1.2683 | Down | 4.69E-15 | 1.71E-14 |
| Unigene36940  | Potri.007G001500.3 | 12.3868 | 29.839   | -1.2684 | Down | 7.08E-13 | 2.34E-12 |
| Unigene50651  | Potri.004G143300.1 | 4.019   | 9.6814   | -1.2684 | Down | 7.08E-13 | 2.34E-12 |
| Unigene1794   | Potri.004G066700.2 | 17.9797 | 43.3134  | -1.2684 | Down | 1.53E-42 | 1.27E-41 |
| Unigene17483  | Potri.006G264700.1 | 8.6912  | 20.9379  | -1.2685 | Down | 1.09E-10 | 3.23E-10 |
| Unigene33803  | Potri.006G035500.1 | 4.3668  | 10.52    | -1.2685 | Down | 1.09E-10 | 3.23E-10 |
| Unigene94404  | Potri.010G202000.1 | 4.8093  | 11.5888  | -1.2688 | Down | 2.86E-18 | 1.19E-17 |
| Unigene1638   | Potri.018G034700.2 | 2.0905  | 5.038    | -1.269  | Down | 2.84E-06 | 6.30E-06 |
| Unigene43268  | Potri.017G078700.1 | 6.5544  | 15.7953  | -1.269  | Down | 5.88E-21 | 2.70E-20 |
| Unigene8342   | Potri.017G057500.1 | 5.8449  | 14.0855  | -1.269  | Down | 3.25E-11 | 9.92E-11 |

|               |                     |         |          |         |      |          |          |
|---------------|---------------------|---------|----------|---------|------|----------|----------|
| Unigene15468  | Potri.016G079200.5  | 6.8143  | 16.4218  | -1.269  | Down | 2.84E-06 | 6.30E-06 |
| Unigene54368  | Potri.014G180800.1  | 13.0035 | 31.3371  | -1.269  | Down | 3.25E-11 | 9.92E-11 |
| Unigene42073  | Potri.008G195900.4  | 4.4996  | 10.8436  | -1.269  | Down | 2.84E-06 | 6.30E-06 |
| Unigene49759  | Potri.008G107900.1  | 43.11   | 103.8959 | -1.269  | Down | 4.28E-60 | 5.10E-59 |
| Unigene29253  | Potri.007G147200.4  | 9.4618  | 22.802   | -1.269  | Down | 8.38E-26 | 4.49E-25 |
| Unigene4431   | Potri.006G267300.1  | 31.0289 | 74.7794  | -1.269  | Down | 3.82E-38 | 2.87E-37 |
| Unigene16779  | Potri.005G251100.2  | 13.185  | 31.7743  | -1.269  | Down | 3.25E-11 | 9.92E-11 |
| Unigene23057  | Potri.004G207700.1  | 28.6156 | 68.9653  | -1.2691 | Down | 1.22E-45 | 1.09E-44 |
| Unigene37390  | Potri.004G145200.2  | 15.4618 | 37.2658  | -1.2691 | Down | 6.38E-14 | 2.22E-13 |
| Unigene31955  | Potri.009G030700.1  | 3.7228  | 8.9729   | -1.2692 | Down | 2.48E-41 | 2.01E-40 |
| Unigene46965  | Potri.019G019500.1  | 18.39   | 44.3269  | -1.2693 | Down | 3.69E-24 | 1.88E-23 |
| Unigene3389   | Potri.003G170600.2  | 10.6313 | 25.6253  | -1.2693 | Down | 5.10E-09 | 1.37E-08 |
| Unigene23654  | Potri.001G179200.1  | 9.1409  | 22.033   | -1.2693 | Down | 1.13E-31 | 7.17E-31 |
| Unigene3133   | Potri.010G228700.4  | 8.3225  | 20.0642  | -1.2695 | Down | 7.80E-82 | 1.31E-80 |
| Unigene91685  | Potri.001G304900.1  | 10.4851 | 25.2778  | -1.2695 | Down | 3.87E-17 | 1.54E-16 |
| Unigene33707  | Potri.016G064800.11 | 17.9388 | 43.2492  | -1.2696 | Down | 1.63E-22 | 7.88E-22 |
| Unigene16091  | Potri.011G167300.1  | 22.7942 | 54.9541  | -1.2696 | Down | 7.90E-20 | 3.50E-19 |
| Unigene21261  | Potri.009G026100.1  | 6.0371  | 14.5551  | -1.2696 | Down | 1.50E-61 | 1.83E-60 |
| Unigene119480 | Potri.002G104100.3  | 1.8111  | 4.3669   | -1.2697 | Down | 8.30E-07 | 1.93E-06 |
| Unigene51909  | Potri.019G058600.1  | 1.843   | 4.444    | -1.2698 | Down | 5.16E-04 | 9.14E-04 |
| Unigene42106  | Potri.015G147000.1  | 3.4813  | 8.3942   | -1.2698 | Down | 5.16E-04 | 9.14E-04 |
| Unigene18351  | Potri.009G063800.1  | 6.5522  | 15.7991  | -1.2698 | Down | 4.56E-31 | 2.85E-30 |
| Unigene114509 | Potri.009G044200.2  | 2.8904  | 6.9694   | -1.2698 | Down | 5.16E-04 | 9.14E-04 |
| Unigene702    | Potri.008G111600.1  | 1.379   | 3.3252   | -1.2698 | Down | 5.16E-04 | 9.13E-04 |
| Unigene83043  | Potri.005G005300.1  | 14.7235 | 35.502   | -1.2698 | Down | 5.77E-15 | 2.10E-14 |
| Unigene26248  | Potri.002G036500.3  | 38.2093 | 92.1319  | -1.2698 | Down | 1.99E-44 | 1.72E-43 |
| Unigene10377  | Potri.001G361600.2  | 1.4977  | 3.6113   | -1.2698 | Down | 5.16E-04 | 9.14E-04 |
| Unigene15635  | Potri.001G360800.1  | 16.1503 | 38.9424  | -1.2698 | Down | 4.95E-23 | 2.43E-22 |
| Unigene30304  | Potri.001G195000.1  | 24.8664 | 59.9589  | -1.2698 | Down | 2.16E-28 | 1.25E-27 |
| Unigene43888  | Potri.001G177300.3  | 5.1874  | 12.508   | -1.2698 | Down | 1.51E-09 | 4.20E-09 |
| Unigene49611  | Potri.001G129100.3  | 1.973   | 4.7574   | -1.2698 | Down | 5.16E-04 | 9.14E-04 |
| Unigene21051  | Potri.019G048300.1  | 12.7052 | 30.6412  | -1.2701 | Down | 1.74E-15 | 6.47E-15 |
| Unigene6867   | Potri.013G154300.2  | 6.056   | 14.6061  | -1.2701 | Down | 8.73E-13 | 2.88E-12 |
| Unigene22950  | Potri.010G199600.3  | 24.3452 | 58.7137  | -1.2701 | Down | 2.00E-29 | 1.19E-28 |
| Unigene7091   | Potri.003G077100.1  | 14.2654 | 34.4042  | -1.2701 | Down | 1.74E-15 | 6.47E-15 |
| Unigene85408  | Potri.004G043700.2  | 48.6572 | 117.3575 | -1.2702 | Down | 1.13E-49 | 1.09E-48 |
| Unigene81609  | Potri.010G094400.1  | 26.3291 | 63.5084  | -1.2703 | Down | 1.38E-24 | 7.12E-24 |
| Unigene18130  | Potri.006G176600.1  | 4.7241  | 11.3947  | -1.2703 | Down | 1.06E-18 | 4.52E-18 |
| Unigene22123  | Potri.013G085000.1  | 4.4682  | 10.7788  | -1.2704 | Down | 2.62E-13 | 8.86E-13 |

|               |                    |          |          |         |      |           |           |
|---------------|--------------------|----------|----------|---------|------|-----------|-----------|
| Unigene31823  | Potri.009G006900.1 | 14.4778  | 34.9264  | -1.2705 | Down | 1.17E-101 | 2.57E-100 |
| Unigene23059  | Potri.006G059700.1 | 23.8876  | 57.6273  | -1.2705 | Down | 4.97E-40  | 3.90E-39  |
| Unigene26892  | Potri.014G193500.4 | 3.5452   | 8.5535   | -1.2706 | Down | 1.34E-10  | 3.97E-10  |
| Unigene8950   | Potri.019G127000.2 | 30.8686  | 74.4812  | -1.2707 | Down | 2.16E-38  | 1.63E-37  |
| Unigene88176  | Potri.015G140600.1 | 48.8988  | 117.9828 | -1.2707 | Down | 1.82E-56  | 2.03E-55  |
| Unigene49760  | Potri.005G140500.3 | 5.492    | 13.2513  | -1.2707 | Down | 7.87E-14  | 2.73E-13  |
| Unigene11559  | Potri.002G186600.1 | 6.0359   | 14.5632  | -1.2707 | Down | 6.08E-23  | 2.98E-22  |
| Unigene38279  | Potri.005G192300.2 | 30.3468  | 73.2322  | -1.2709 | Down | 5.57E-49  | 5.32E-48  |
| Unigene34714  | Potri.019G020000.1 | 7.1914   | 17.3551  | -1.271  | Down | 4.01E-11  | 1.22E-10  |
| Unigene14939  | Potri.015G071200.1 | 5.7033   | 13.7637  | -1.271  | Down | 7.19E-08  | 1.80E-07  |
| Unigene70172  | Potri.008G016000.2 | 3.295    | 7.9518   | -1.271  | Down | 7.19E-08  | 1.80E-07  |
| Unigene33004  | Potri.006G136200.1 | 18.9311  | 45.6847  | -1.271  | Down | 1.04E-61  | 1.28E-60  |
| Unigene63524  | Potri.005G253800.5 | 2.6951   | 6.504    | -1.271  | Down | 1.46E-04  | 2.76E-04  |
| Unigene19063  | Potri.005G117300.1 | 2.3196   | 5.5979   | -1.271  | Down | 1.46E-04  | 2.76E-04  |
| Unigene105504 | Potri.001G046700.1 | 1.2915   | 3.1169   | -1.2711 | Down | 1.46E-04  | 2.76E-04  |
| Unigene76742  | Potri.001G230000.1 | 51.2663  | 123.7421 | -1.2713 | Down | 1.73E-41  | 1.40E-40  |
| Unigene21986  | Potri.001G323100.4 | 4.514    | 10.8964  | -1.2714 | Down | 1.31E-18  | 5.54E-18  |
| Unigene84278  | Potri.010G203200.1 | 14.5428  | 35.1077  | -1.2715 | Down | 2.14E-15  | 7.94E-15  |
| Unigene63397  | Potri.006G262200.1 | 2.9318   | 7.0777   | -1.2715 | Down | 2.12E-08  | 5.50E-08  |
| Unigene45403  | Potri.002G030200.1 | 3.4747   | 8.3883   | -1.2715 | Down | 2.47E-22  | 1.18E-21  |
| Unigene2853   | Potri.001G195300.1 | 3.0518   | 7.3673   | -1.2715 | Down | 2.12E-08  | 5.50E-08  |
| Unigene44286  | Potri.019G003100.1 | 16.2253  | 39.1806  | -1.2719 | Down | 1.08E-12  | 3.53E-12  |
| Unigene49426  | Potri.012G092000.1 | 6.6158   | 15.9758  | -1.2719 | Down | 6.29E-09  | 1.68E-08  |
| Unigene85771  | Potri.008G071900.1 | 3.6918   | 8.9148   | -1.2719 | Down | 4.19E-05  | 8.35E-05  |
| Unigene41618  | Potri.005G185200.1 | 8.0924   | 19.5414  | -1.2719 | Down | 1.08E-12  | 3.53E-12  |
| Unigene19177  | Potri.004G140100.1 | 2.6128   | 6.3093   | -1.2719 | Down | 4.19E-05  | 8.35E-05  |
| Unigene49505  | Potri.005G210600.1 | 31.5803  | 76.2626  | -1.272  | Down | 2.39E-50  | 2.35E-49  |
| Unigene21708  | Potri.014G116600.1 | 7.7109   | 18.6279  | -1.2725 | Down | 2.40E-72  | 3.50E-71  |
| Unigene33139  | Potri.001G128700.1 | 16.0031  | 38.66    | -1.2725 | Down | 6.20E-35  | 4.29E-34  |
| Unigene49404  | Potri.011G071700.1 | 5.8894   | 14.2283  | -1.2726 | Down | 5.56E-10  | 1.59E-09  |
| Unigene34802  | Potri.001G392900.1 | 1.5502   | 3.7452   | -1.2726 | Down | 1.21E-05  | 2.54E-05  |
| Unigene104194 | Potri.001G156600.7 | 5.1074   | 12.339   | -1.2726 | Down | 1.21E-05  | 2.54E-05  |
| Unigene86210  | Potri.014G138800.1 | 114.1441 | 275.7861 | -1.2727 | Down | 1.60E-118 | 4.25E-117 |
| Unigene81402  | Potri.006G257900.2 | 10.2794  | 24.8389  | -1.2728 | Down | 1.66E-10  | 4.87E-10  |
| Unigene108091 | Potri.004G228500.7 | 12.7364  | 30.776   | -1.2728 | Down | 1.66E-10  | 4.87E-10  |
| Unigene39222  | Potri.004G224000.3 | 11.9684  | 28.9183  | -1.2728 | Down | 4.94E-28  | 2.84E-27  |
| Unigene42548  | Potri.005G190000.1 | 2.2033   | 5.3241   | -1.2729 | Down | 1.66E-10  | 4.87E-10  |
| Unigene78518  | Potri.017G007000.5 | 5.8231   | 14.0733  | -1.2731 | Down | 3.52E-06  | 7.76E-06  |
| Unigene55872  | Potri.009G040500.1 | 3.217    | 7.7748   | -1.2731 | Down | 3.52E-06  | 7.76E-06  |

|               |                     |         |         |         |      |          |          |
|---------------|---------------------|---------|---------|---------|------|----------|----------|
| Unigene154    | Potri.008G084700.1  | 8.2311  | 19.8929 | -1.2731 | Down | 1.66E-58 | 1.92E-57 |
| Unigene67855  | Potri.012G055600.1  | 6.8312  | 16.5105 | -1.2732 | Down | 1.28E-30 | 7.91E-30 |
| Unigene19250  | Potri.007G022700.6  | 22.634  | 54.7067 | -1.2732 | Down | 7.06E-36 | 5.01E-35 |
| Unigene6669   | Potri.004G167700.1  | 40.3838 | 97.6075 | -1.2732 | Down | 2.52E-55 | 2.74E-54 |
| Unigene43453  | Potri.002G243400.10 | 4.4696  | 10.8041 | -1.2734 | Down | 6.59E-27 | 3.66E-26 |
| Unigene17006  | Potri.017G035800.2  | 16.4734 | 39.8245 | -1.2735 | Down | 3.33E-33 | 2.21E-32 |
| Unigene12842  | Potri.010G013300.1  | 3.3722  | 8.1522  | -1.2735 | Down | 4.43E-12 | 1.41E-11 |
| Unigene2556   | Potri.004G067700.2  | 1.9309  | 4.668   | -1.2735 | Down | 1.03E-06 | 2.37E-06 |
| Unigene17734  | Potri.001G386900.2  | 3.2538  | 7.866   | -1.2735 | Down | 1.03E-06 | 2.37E-06 |
| Unigene24516  | Potri.014G092500.4  | 7.4016  | 17.895  | -1.2736 | Down | 6.57E-18 | 2.71E-17 |
| Unigene32602  | Potri.010G056900.5  | 12.4952 | 30.209  | -1.2736 | Down | 9.62E-45 | 8.39E-44 |
| Unigene31902  | Potri.011G079100.1  | 7.13    | 17.2392 | -1.2737 | Down | 1.54E-51 | 1.56E-50 |
| Unigene39400  | Potri.017G070300.3  | 14.361  | 34.7245 | -1.2738 | Down | 5.18E-30 | 3.14E-29 |
| Unigene8789   | Potri.008G203600.5  | 19.58   | 47.3441 | -1.2738 | Down | 5.18E-30 | 3.14E-29 |
| Unigene62010  | Potri.T092300.1     | 6.3101  | 15.2583 | -1.2739 | Down | 3.02E-07 | 7.22E-07 |
| Unigene42838  | Potri.011G168300.1  | 8.8109  | 21.3055 | -1.2739 | Down | 2.64E-36 | 1.89E-35 |
| Unigene37123  | Potri.010G075900.1  | 7.6994  | 18.6179 | -1.2739 | Down | 3.02E-07 | 7.22E-07 |
| Unigene44078  | Potri.006G115100.3  | 24.9279 | 60.2778 | -1.2739 | Down | 2.64E-36 | 1.89E-35 |
| Unigene38581  | Potri.003G043900.1  | 14.2244 | 34.3958 | -1.2739 | Down | 6.00E-19 | 2.57E-18 |
| Unigene23536  | Potri.008G103500.3  | 7.4278  | 17.9624 | -1.274  | Down | 1.81E-19 | 7.91E-19 |
| Unigene76927  | Potri.005G154000.1  | 22.7396 | 54.9903 | -1.274  | Down | 1.81E-19 | 7.91E-19 |
| Unigene49977  | Potri.001G353700.10 | 28.0879 | 67.9244 | -1.274  | Down | 2.19E-49 | 2.11E-48 |
| Unigene40915  | Potri.011G043200.1  | 8.8294  | 21.3545 | -1.2742 | Down | 8.89E-08 | 2.21E-07 |
| Unigene49893  | Potri.008G201900.1  | 5.934   | 14.3519 | -1.2742 | Down | 3.59E-14 | 1.26E-13 |
| Unigene11493  | Potri.007G081000.5  | 14.8014 | 35.7999 | -1.2742 | Down | 5.39E-53 | 5.59E-52 |
| Unigene52562  | Potri.002G035700.1  | 16.8559 | 40.7687 | -1.2742 | Down | 1.24E-33 | 8.33E-33 |
| Unigene29101  | Potri.001G112300.2  | 11.4349 | 27.6561 | -1.2742 | Down | 2.10E-39 | 1.63E-38 |
| Unigene42380  | Potri.009G023300.4  | 7.2555  | 17.5494 | -1.2743 | Down | 3.11E-47 | 2.87E-46 |
| Unigene14491  | Potri.018G056200.3  | 2.4316  | 5.882   | -1.2744 | Down | 2.62E-08 | 6.76E-08 |
| Unigene119488 | Potri.010G042900.1  | 2.2388  | 5.4157  | -1.2744 | Down | 2.62E-08 | 6.76E-08 |
| Unigene40029  | Potri.002G247400.2  | 7.6691  | 18.5528 | -1.2745 | Down | 9.78E-16 | 3.68E-15 |
| Unigene34650  | Potri.017G033000.1  | 3.6096  | 8.7329  | -1.2746 | Down | 7.77E-09 | 2.07E-08 |
| Unigene70052  | Potri.006G094700.1  | 2.9036  | 7.0264  | -1.2749 | Down | 2.44E-18 | 1.02E-17 |
| Unigene37634  | Potri.014G080800.1  | 17.0737 | 41.3172 | -1.275  | Down | 2.44E-18 | 1.02E-17 |
| Unigene33007  | Potri.011G104000.1  | 9.5567  | 23.1276 | -1.275  | Down | 7.38E-19 | 3.15E-18 |
| Unigene18258  | Potri.002G105700.5  | 22.4324 | 54.289  | -1.2751 | Down | 1.66E-45 | 1.47E-44 |
| Unigene52530  | Potri.002G057800.1  | 6.1719  | 14.9369 | -1.2751 | Down | 2.23E-19 | 9.71E-19 |
| Unigene42179  | Potri.011G082800.4  | 9.5539  | 23.1241 | -1.2752 | Down | 6.10E-11 | 1.84E-10 |
| Unigene4055   | Potri.002G247400.2  | 21.1896 | 51.287  | -1.2752 | Down | 2.04E-20 | 9.21E-20 |

|               |                    |         |          |         |      |           |           |
|---------------|--------------------|---------|----------|---------|------|-----------|-----------|
| Unigene32874  | Potri.001G349400.1 | 12.398  | 30.011   | -1.2754 | Down | 6.68E-32  | 4.28E-31  |
| Unigene29369  | Potri.001G037200.1 | 24.9273 | 60.3435  | -1.2755 | Down | 2.84E-54  | 3.02E-53  |
| Unigene52018  | Potri.001G031400.3 | 11.8744 | 28.7467  | -1.2755 | Down | 1.64E-12  | 5.32E-12  |
| Unigene23966  | Potri.005G204100.1 | 25.6613 | 62.1278  | -1.2756 | Down | 7.53E-71  | 1.07E-69  |
| Unigene29476  | Potri.001G390500.2 | 3.2868  | 7.9575   | -1.2756 | Down | 4.90E-13  | 1.64E-12  |
| Unigene54659  | Potri.001G198700.3 | 10.8303 | 26.2195  | -1.2756 | Down | 5.29E-35  | 3.66E-34  |
| Unigene43243  | Potri.011G106600.5 | 14.5141 | 35.141   | -1.2757 | Down | 1.33E-25  | 7.10E-25  |
| Unigene1669   | Potri.006G118400.1 | 40.1754 | 97.2707  | -1.2757 | Down | 5.66E-61  | 6.85E-60  |
| Unigene53567  | Potri.006G116500.5 | 18.2161 | 44.1103  | -1.2759 | Down | 4.00E-15  | 1.47E-14  |
| Unigene34927  | Potri.005G130900.2 | 9.0552  | 21.9275  | -1.2759 | Down | 9.51E-43  | 7.95E-42  |
| Unigene22257  | Potri.001G418000.1 | 9.545   | 23.1127  | -1.2759 | Down | 3.43E-28  | 1.98E-27  |
| Unigene61395  | Potri.006G165100.3 | 3.9742  | 9.624    | -1.276  | Down | 1.20E-15  | 4.51E-15  |
| Unigene20775  | Potri.006G232900.1 | 34.9124 | 84.5497  | -1.2761 | Down | 8.21E-32  | 5.25E-31  |
| Unigene28735  | Potri.002G046800.3 | 39.5132 | 95.6933  | -1.2761 | Down | 1.69E-93  | 3.31E-92  |
| Unigene24209  | Potri.009G100600.1 | 10.879  | 26.3495  | -1.2762 | Down | 9.08E-19  | 3.86E-18  |
| Unigene10779  | Potri.003G010000.3 | 5.5367  | 13.41    | -1.2762 | Down | 4.60E-53  | 4.78E-52  |
| Unigene21357  | Potri.004G048700.2 | 7.2952  | 17.6708  | -1.2763 | Down | 9.84E-59  | 1.14E-57  |
| Unigene28410  | Potri.002G089100.2 | 6.2554  | 15.1532  | -1.2764 | Down | 2.11E-22  | 1.01E-21  |
| Unigene18358  | Potri.001G089900.1 | 6.9192  | 16.7603  | -1.2764 | Down | 1.36E-40  | 1.08E-39  |
| Unigene18423  | Potri.007G023000.2 | 4.299   | 10.4144  | -1.2765 | Down | 5.87E-24  | 2.97E-23  |
| Unigene33471  | Potri.001G101400.1 | 17.0483 | 41.2984  | -1.2765 | Down | 6.39E-23  | 3.13E-22  |
| Unigene36078  | Potri.002G056800.1 | 26.5401 | 64.2963  | -1.2766 | Down | 1.64E-25  | 8.70E-25  |
| Unigene16697  | Potri.001G091000.1 | 23.7033 | 57.426   | -1.2766 | Down | 4.58E-27  | 2.55E-26  |
| Unigene42603  | Potri.018G149400.1 | 11.0736 | 26.8288  | -1.2767 | Down | 4.79E-134 | 1.48E-132 |
| Unigene26161  | Potri.014G086000.1 | 44.8791 | 108.7364 | -1.2767 | Down | 1.13E-59  | 1.33E-58  |
| Unigene32032  | Potri.012G097100.1 | 10.106  | 24.4846  | -1.2767 | Down | 4.90E-55  | 5.29E-54  |
| Unigene50801  | Potri.006G275200.1 | 17.2907 | 41.8935  | -1.2767 | Down | 3.32E-31  | 2.08E-30  |
| Unigene14230  | Potri.001G109600.1 | 21.5652 | 52.2507  | -1.2767 | Down | 1.01E-31  | 6.43E-31  |
| Unigene86741  | Potri.010G210200.4 | 29.4728 | 71.4111  | -1.2768 | Down | 9.34E-33  | 6.12E-32  |
| Unigene27508  | Potri.002G091400.1 | 16.2199 | 39.3013  | -1.2768 | Down | 8.00E-35  | 5.51E-34  |
| Unigene83017  | Potri.008G031700.2 | 61.8387 | 149.8636 | -1.2771 | Down | 1.48E-58  | 1.72E-57  |
| Unigene13131  | Potri.004G201400.1 | 50.3354 | 121.9908 | -1.2771 | Down | 6.89E-70  | 9.66E-69  |
| Unigene40472  | Potri.019G119400.3 | 2.3542  | 5.7068   | -1.2774 | Down | 1.50E-05  | 3.12E-05  |
| Unigene106445 | Potri.018G110300.4 | 8.0274  | 19.4589  | -1.2774 | Down | 1.35E-16  | 5.25E-16  |
| Unigene117599 | Potri.017G110000.2 | 7.2193  | 17.5     | -1.2774 | Down | 7.53E-11  | 2.25E-10  |
| Unigene71366  | Potri.016G002100.1 | 8.0846  | 19.5977  | -1.2774 | Down | 3.73E-07  | 8.88E-07  |
| Unigene74475  | Potri.015G049500.1 | 10.361  | 25.1158  | -1.2774 | Down | 2.85E-09  | 7.80E-09  |
| Unigene86166  | Potri.015G028100.1 | 8.0106  | 19.4184  | -1.2774 | Down | 8.47E-10  | 2.39E-09  |
| Unigene23470  | Potri.014G093200.4 | 4.1272  | 10.0046  | -1.2774 | Down | 6.73E-12  | 2.13E-11  |



|               |                    |         |          |         |      |           |           |
|---------------|--------------------|---------|----------|---------|------|-----------|-----------|
| Unigene27157  | Potri.013G085500.1 | 3.13    | 7.5874   | -1.2774 | Down | 5.45E-14  | 1.90E-13  |
| Unigene47233  | Potri.011G078900.1 | 7.4228  | 17.9934  | -1.2774 | Down | 1.27E-06  | 2.90E-06  |
| Unigene45233  | Potri.010G211400.3 | 7.2666  | 17.6149  | -1.2774 | Down | 6.11E-26  | 3.29E-25  |
| Unigene28222  | Potri.010G142700.1 | 15.0312 | 36.4366  | -1.2774 | Down | 1.48E-15  | 5.54E-15  |
| Unigene888    | Potri.010G063100.1 | 8.2273  | 19.9435  | -1.2774 | Down | 1.58E-28  | 9.16E-28  |
| Unigene45511  | Potri.009G158200.2 | 1.7491  | 4.2399   | -1.2774 | Down | 1.27E-06  | 2.90E-06  |
| Unigene49469  | Potri.009G115400.1 | 1.9269  | 4.671    | -1.2774 | Down | 5.20E-05  | 1.03E-04  |
| Unigene53857  | Potri.008G179500.1 | 2.5798  | 6.2536   | -1.2774 | Down | 1.82E-04  | 3.40E-04  |
| Unigene2122   | Potri.008G172400.2 | 10.3405 | 25.066   | -1.2774 | Down | 1.02E-19  | 4.50E-19  |
| Unigene32431  | Potri.008G158600.1 | 7.6483  | 18.5401  | -1.2774 | Down | 2.57E-37  | 1.89E-36  |
| Unigene22864  | Potri.008G130400.1 | 2.9307  | 7.1042   | -1.2774 | Down | 3.73E-07  | 8.88E-07  |
| Unigene118103 | Potri.008G042000.3 | 4.399   | 10.6634  | -1.2774 | Down | 1.10E-07  | 2.71E-07  |
| Unigene32672  | Potri.006G227500.1 | 6.5694  | 15.9247  | -1.2774 | Down | 3.73E-48  | 3.51E-47  |
| Unigene119239 | Potri.006G226900.1 | 2.1014  | 5.0939   | -1.2774 | Down | 4.36E-06  | 9.51E-06  |
| Unigene26284  | Potri.005G164000.1 | 21.159  | 51.2909  | -1.2774 | Down | 8.56E-22  | 4.04E-21  |
| Unigene43251  | Potri.005G100500.4 | 6.5479  | 15.8725  | -1.2774 | Down | 2.38E-23  | 1.18E-22  |
| Unigene94667  | Potri.005G033800.1 | 3.4377  | 8.3333   | -1.2774 | Down | 1.27E-06  | 2.90E-06  |
| Unigene10359  | Potri.004G094300.1 | 2.0965  | 5.082    | -1.2774 | Down | 1.82E-04  | 3.40E-04  |
| Unigene45912  | Potri.004G038400.1 | 2.3252  | 5.6364   | -1.2774 | Down | 1.82E-04  | 3.40E-04  |
| Unigene4917   | Potri.004G038300.3 | 2.6045  | 6.3134   | -1.2774 | Down | 5.20E-05  | 1.03E-04  |
| Unigene3375   | Potri.003G084900.1 | 6.0759  | 14.7285  | -1.2774 | Down | 4.36E-06  | 9.51E-06  |
| Unigene41399  | Potri.002G222200.1 | 2.5045  | 6.0711   | -1.2774 | Down | 5.20E-05  | 1.03E-04  |
| Unigene67062  | Potri.001G366900.1 | 10.9615 | 26.5714  | -1.2774 | Down | 7.53E-11  | 2.25E-10  |
| Unigene33049  | Potri.001G207800.1 | 7.7414  | 18.7657  | -1.2774 | Down | 6.04E-13  | 2.01E-12  |
| Unigene50704  | Potri.001G179200.5 | 3.329   | 8.0696   | -1.2774 | Down | 3.73E-07  | 8.88E-07  |
| Unigene8835   | Potri.001G049400.3 | 7.2193  | 17.5     | -1.2774 | Down | 1.10E-07  | 2.71E-07  |
| Unigene119246 | Potri.006G244900.1 | 1.6242  | 3.9373   | -1.2775 | Down | 5.20E-05  | 1.03E-04  |
| Unigene43597  | Potri.005G229500.3 | 3.1643  | 7.6706   | -1.2775 | Down | 6.73E-12  | 2.13E-11  |
| Unigene986    | Potri.003G090800.1 | 46.8893 | 113.7079 | -1.278  | Down | 3.44E-110 | 8.33E-109 |
| Unigene114810 | Potri.007G092700.4 | 30.5668 | 74.1323  | -1.2781 | Down | 5.02E-31  | 3.13E-30  |
| Unigene16310  | Potri.018G076200.2 | 27.9422 | 67.7688  | -1.2782 | Down | 1.79E-29  | 1.07E-28  |
| Unigene23607  | Potri.013G145600.2 | 9.0942  | 22.0569  | -1.2782 | Down | 1.94E-28  | 1.12E-27  |
| Unigene22748  | Potri.017G018500.1 | 30.1873 | 73.2188  | -1.2783 | Down | 1.04E-75  | 1.59E-74  |
| Unigene26598  | Potri.013G123500.1 | 45.1123 | 109.4232 | -1.2783 | Down | 5.62E-48  | 5.27E-47  |
| Unigene51011  | Potri.010G036700.1 | 27.7038 | 67.1977  | -1.2783 | Down | 8.16E-25  | 4.25E-24  |
| Unigene77129  | Potri.011G132400.1 | 27.201  | 65.9809  | -1.2784 | Down | 2.93E-23  | 1.45E-22  |
| Unigene21276  | Potri.003G075700.1 | 8.1731  | 19.8262  | -1.2785 | Down | 2.66E-42  | 2.20E-41  |
| Unigene48550  | Potri.014G103900.1 | 36.0044 | 87.347   | -1.2786 | Down | 1.18E-37  | 8.75E-37  |
| Unigene29107  | Potri.010G182700.1 | 6.858   | 16.6375  | -1.2786 | Down | 1.26E-19  | 5.52E-19  |

|               |                    |         |          |         |      |           |           |
|---------------|--------------------|---------|----------|---------|------|-----------|-----------|
| Unigene17172  | Potri.008G059100.2 | 27.702  | 67.2103  | -1.2787 | Down | 1.48E-34  | 1.02E-33  |
| Unigene19428  | Potri.002G187100.2 | 15.3174 | 37.1619  | -1.2787 | Down | 1.38E-18  | 5.81E-18  |
| Unigene18446  | Potri.017G086500.1 | 46.4602 | 112.7309 | -1.2788 | Down | 4.86E-166 | 2.00E-164 |
| Unigene11613  | Potri.010G175600.1 | 23.8125 | 57.777   | -1.2788 | Down | 1.27E-78  | 2.04E-77  |
| Unigene75905  | Potri.008G046800.6 | 19.2352 | 46.6725  | -1.2788 | Down | 1.66E-16  | 6.45E-16  |
| Unigene21160  | Potri.013G108600.1 | 18.4011 | 44.6502  | -1.2789 | Down | 5.50E-16  | 2.09E-15  |
| Unigene116609 | Potri.003G137500.1 | 24.5603 | 59.5978  | -1.2789 | Down | 2.20E-29  | 1.31E-28  |
| Unigene1299   | Potri.002G027100.1 | 14.3249 | 34.7614  | -1.279  | Down | 3.27E-42  | 2.70E-41  |
| Unigene22883  | Potri.016G065900.1 | 9.7637  | 23.6975  | -1.2792 | Down | 1.00E-24  | 5.21E-24  |
| Unigene101472 | Potri.007G063600.1 | 2.4848  | 6.0307   | -1.2792 | Down | 2.23E-13  | 7.58E-13  |
| Unigene44638  | Potri.001G253800.1 | 24.3645 | 59.1349  | -1.2792 | Down | 8.48E-48  | 7.93E-47  |
| Unigene32440  | Potri.007G121500.1 | 20.1226 | 48.8405  | -1.2793 | Down | 8.85E-70  | 1.24E-68  |
| Unigene84614  | Potri.003G121600.1 | 102.707 | 249.2918 | -1.2793 | Down | 2.00E-101 | 4.36E-100 |
| Unigene31142  | Potri.015G122500.1 | 5.1857  | 12.5873  | -1.2794 | Down | 2.48E-12  | 8.01E-12  |
| Unigene23975  | Potri.010G113900.1 | 2.7009  | 6.5563   | -1.2794 | Down | 8.29E-12  | 2.61E-11  |
| Unigene29561  | Potri.009G158600.2 | 15.4023 | 37.3862  | -1.2794 | Down | 3.60E-23  | 1.78E-22  |
| Unigene53984  | Potri.003G201500.1 | 10.019  | 24.3192  | -1.2794 | Down | 2.48E-12  | 8.01E-12  |
| Unigene24638  | Potri.001G383800.4 | 8.0832  | 19.6205  | -1.2794 | Down | 2.48E-12  | 8.01E-12  |
| Unigene23683  | Potri.001G120800.1 | 4.0036  | 9.7187   | -1.2795 | Down | 3.92E-22  | 1.87E-21  |
| Unigene14031  | Potri.005G148100.1 | 22.4696 | 54.5486  | -1.2796 | Down | 4.28E-21  | 1.97E-20  |
| Unigene40929  | Potri.002G248700.1 | 13.3213 | 32.3395  | -1.2796 | Down | 2.77E-11  | 8.49E-11  |
| Unigene32326  | Potri.002G004000.2 | 12.2102 | 29.6433  | -1.2796 | Down | 1.41E-20  | 6.41E-20  |
| Unigene500    | Potri.013G115000.1 | 3.2237  | 7.8267   | -1.2797 | Down | 4.67E-20  | 2.08E-19  |
| Unigene9080   | Potri.008G189900.3 | 31.5612 | 76.6285  | -1.2797 | Down | 8.89E-29  | 5.21E-28  |
| Unigene5815   | Potri.005G156900.1 | 20.8525 | 50.627   | -1.2797 | Down | 4.67E-20  | 2.08E-19  |
| Unigene51676  | Potri.016G104900.1 | 10.2003 | 24.7672  | -1.2798 | Down | 3.11E-10  | 9.00E-10  |
| Unigene88891  | Potri.006G043700.1 | 29.5787 | 71.8179  | -1.2798 | Down | 5.85E-37  | 4.27E-36  |
| Unigene45562  | Potri.010G054400.1 | 6.1014  | 14.8159  | -1.2799 | Down | 6.82E-35  | 4.70E-34  |
| Unigene110549 | Potri.010G138300.3 | 30.8054 | 74.8091  | -1.28   | Down | 1.13E-25  | 6.06E-25  |
| Unigene24105  | Potri.008G047700.3 | 12.6846 | 30.8037  | -1.28   | Down | 1.13E-25  | 6.06E-25  |
| Unigene30876  | Potri.003G084900.3 | 4.6349  | 11.255   | -1.28   | Down | 1.05E-09  | 2.93E-09  |
| Unigene20042  | Potri.001G405800.1 | 7.781   | 18.895   | -1.28   | Down | 1.05E-09  | 2.93E-09  |
| Unigene24414  | Potri.014G135800.1 | 6.3894  | 15.5186  | -1.2802 | Down | 2.83E-31  | 1.78E-30  |
| Unigene21344  | Potri.011G110500.1 | 25.0447 | 60.8268  | -1.2802 | Down | 5.30E-129 | 1.56E-127 |
| Unigene72995  | Potri.010G213700.1 | 10.5295 | 25.5724  | -1.2802 | Down | 3.52E-09  | 9.56E-09  |
| Unigene7005   | Potri.009G069800.4 | 13.8506 | 33.6404  | -1.2802 | Down | 2.04E-16  | 7.91E-16  |
| Unigene65952  | Potri.009G040600.1 | 5.6718  | 13.7748  | -1.2802 | Down | 3.52E-09  | 9.56E-09  |
| Unigene40379  | Potri.003G218400.1 | 79.1231 | 192.1728 | -1.2802 | Down | 1.01E-112 | 2.51E-111 |
| Unigene30938  | Potri.001G111800.1 | 15.4473 | 37.5178  | -1.2802 | Down | 6.18E-39  | 4.72E-38  |

|               |                    |         |          |         |      |           |           |
|---------------|--------------------|---------|----------|---------|------|-----------|-----------|
| Unigene79400  | Potri.009G139600.1 | 52.0961 | 126.5336 | -1.2803 | Down | 1.48E-45  | 1.32E-44  |
| Unigene40120  | Potri.010G130700.1 | 2.8257  | 6.8636   | -1.2804 | Down | 1.19E-08  | 3.12E-08  |
| Unigene12789  | Potri.009G015000.3 | 31.5803 | 76.7091  | -1.2804 | Down | 3.86E-51  | 3.86E-50  |
| Unigene9372   | Potri.001G387600.1 | 52.9588 | 128.6395 | -1.2804 | Down | 7.08E-65  | 9.17E-64  |
| Unigene11356  | Potri.013G133200.1 | 18.1374 | 44.06    | -1.2805 | Down | 2.95E-123 | 8.21E-122 |
| Unigene31971  | Potri.018G150400.1 | 9.8618  | 23.9589  | -1.2806 | Down | 3.12E-92  | 6.02E-91  |
| Unigene62628  | Potri.015G105100.3 | 6.4924  | 15.7724  | -1.2806 | Down | 4.01E-08  | 1.02E-07  |
| Unigene3784   | Potri.003G150400.1 | 4.7916  | 11.6406  | -1.2806 | Down | 4.01E-08  | 1.02E-07  |
| Unigene19468  | Potri.001G209500.1 | 6.3621  | 15.4558  | -1.2806 | Down | 4.01E-08  | 1.02E-07  |
| Unigene51351  | Potri.003G106200.4 | 15.1048 | 36.6981  | -1.2807 | Down | 3.90E-27  | 2.18E-26  |
| Unigene35059  | Potri.014G055800.1 | 6.0814  | 14.7783  | -1.281  | Down | 2.75E-13  | 9.30E-13  |
| Unigene27640  | Potri.004G124600.3 | 8.1877  | 19.8966  | -1.281  | Down | 2.75E-13  | 9.30E-13  |
| Unigene2042   | Potri.014G102000.1 | 2.4675  | 5.9969   | -1.2812 | Down | 4.62E-07  | 1.09E-06  |
| Unigene34084  | Potri.002G161100.1 | 4.4184  | 10.7382  | -1.2812 | Down | 9.17E-13  | 3.02E-12  |
| Unigene43515  | Potri.001G188300.1 | 33.0478 | 80.3184  | -1.2812 | Down | 1.65E-90  | 3.10E-89  |
| Unigene26549  | Potri.001G067800.1 | 17.6899 | 42.9923  | -1.2812 | Down | 2.08E-18  | 8.74E-18  |
| Unigene27100  | Potri.005G047600.4 | 6.4256  | 15.6182  | -1.2813 | Down | 3.06E-12  | 9.83E-12  |
| Unigene34264  | Potri.003G170600.1 | 12.7686 | 31.0368  | -1.2814 | Down | 4.42E-28  | 2.54E-27  |
| Unigene66842  | Potri.013G010900.2 | 13.511  | 32.8449  | -1.2815 | Down | 7.57E-17  | 2.99E-16  |
| Unigene70760  | Potri.005G049000.1 | 21.7117 | 52.7806  | -1.2815 | Down | 7.57E-17  | 2.99E-16  |
| Unigene118551 | Potri.010G200500.2 | 3.2041  | 7.7892   | -1.2816 | Down | 1.58E-06  | 3.57E-06  |
| Unigene13472  | Potri.010G138900.3 | 19.0893 | 46.4092  | -1.2816 | Down | 3.00E-41  | 2.43E-40  |
| Unigene50742  | Potri.014G161100.1 | 11.5952 | 28.1904  | -1.2817 | Down | 4.27E-31  | 2.68E-30  |
| Unigene12791  | Potri.012G104500.4 | 12.929  | 31.4332  | -1.2817 | Down | 2.51E-16  | 9.69E-16  |
| Unigene41116  | Potri.005G040600.1 | 27.7889 | 67.5624  | -1.2817 | Down | 5.20E-26  | 2.81E-25  |
| Unigene25330  | Potri.013G016800.1 | 39.0888 | 95.0506  | -1.2819 | Down | 1.15E-38  | 8.70E-38  |
| Unigene48359  | Potri.007G037800.5 | 28.024  | 68.1448  | -1.2819 | Down | 1.15E-38  | 8.70E-38  |
| Unigene39616  | Potri.001G358400.1 | 7.229   | 17.5776  | -1.2819 | Down | 2.14E-20  | 9.65E-20  |
| Unigene26926  | Potri.001G149600.2 | 48.191  | 117.1801 | -1.2819 | Down | 9.69E-44  | 8.27E-43  |
| Unigene23639  | Potri.014G057400.1 | 5.4968  | 13.3669  | -1.282  | Down | 1.14E-10  | 3.39E-10  |
| Unigene28597  | Potri.014G047600.1 | 3.8912  | 9.4624   | -1.282  | Down | 1.14E-10  | 3.39E-10  |
| Unigene61019  | Potri.010G153300.2 | 1.5882  | 3.8621   | -1.282  | Down | 5.40E-06  | 1.17E-05  |
| Unigene16032  | Potri.008G107300.1 | 3.3997  | 8.2673   | -1.282  | Down | 5.40E-06  | 1.17E-05  |
| Unigene25347  | Potri.006G047700.2 | 8.2888  | 20.1564  | -1.282  | Down | 1.14E-10  | 3.39E-10  |
| Unigene27932  | Potri.014G035000.1 | 11.4509 | 27.8484  | -1.2821 | Down | 2.34E-19  | 1.02E-18  |
| Unigene30414  | Potri.008G066700.3 | 72.9037 | 177.302  | -1.2821 | Down | 1.30E-85  | 2.31E-84  |
| Unigene49354  | Potri.001G150200.1 | 5.8985  | 14.3452  | -1.2821 | Down | 2.34E-19  | 1.02E-18  |
| Unigene47904  | Potri.004G043700.2 | 39.5481 | 96.188   | -1.2822 | Down | 1.21E-40  | 9.64E-40  |
| Unigene25204  | Potri.005G095300.2 | 7.5981  | 18.4802  | -1.2823 | Down | 3.84E-10  | 1.11E-09  |

|               |                    |         |          |         |      |           |           |
|---------------|--------------------|---------|----------|---------|------|-----------|-----------|
| Unigene3194   | Potri.008G125700.1 | 13.4002 | 32.5947  | -1.2824 | Down | 3.06E-14  | 1.08E-13  |
| Unigene3498   | Potri.006G234000.3 | 12.0602 | 29.3352  | -1.2824 | Down | 3.06E-14  | 1.08E-13  |
| Unigene1443   | Potri.001G161000.1 | 10.5965 | 25.7754  | -1.2824 | Down | 5.25E-31  | 3.28E-30  |
| Unigene23128  | Potri.011G136700.3 | 2.0797  | 5.0593   | -1.2826 | Down | 1.86E-05  | 3.83E-05  |
| Unigene118789 | Potri.004G094200.1 | 2.3502  | 5.7174   | -1.2826 | Down | 1.86E-05  | 3.83E-05  |
| Unigene50301  | Potri.016G115100.1 | 8.5778  | 20.869   | -1.2827 | Down | 1.68E-33  | 1.12E-32  |
| Unigene11948  | Potri.011G078300.1 | 16.3058 | 39.6728  | -1.2828 | Down | 5.52E-33  | 3.64E-32  |
| Unigene28936  | Potri.003G159600.1 | 3.443   | 8.3771   | -1.2828 | Down | 2.81E-17  | 1.13E-16  |
| Unigene38677  | Potri.003G038900.1 | 11.3603 | 27.6401  | -1.2828 | Down | 2.81E-17  | 1.13E-16  |
| Unigene11687  | Potri.013G134700.2 | 2.9     | 7.0567   | -1.2829 | Down | 9.32E-17  | 3.66E-16  |
| Unigene10372  | Potri.010G067500.1 | 14.1397 | 34.4069  | -1.2829 | Down | 9.32E-17  | 3.66E-16  |
| Unigene43706  | Potri.012G111200.2 | 11.2234 | 27.3115  | -1.283  | Down | 6.68E-28  | 3.82E-27  |
| Unigene50592  | Potri.002G178200.1 | 5.0078  | 12.1858  | -1.283  | Down | 4.34E-09  | 1.17E-08  |
| Unigene20256  | Potri.019G087000.2 | 3.5283  | 8.5869   | -1.2832 | Down | 3.09E-16  | 1.19E-15  |
| Unigene1562   | Potri.019G065700.3 | 27.397  | 66.679   | -1.2832 | Down | 1.19E-66  | 1.59E-65  |
| Unigene71370  | Potri.018G005800.1 | 25.5401 | 62.1584  | -1.2832 | Down | 8.70E-20  | 3.84E-19  |
| Unigene18234  | Potri.009G168000.4 | 14.7902 | 35.9953  | -1.2832 | Down | 1.91E-34  | 1.30E-33  |
| Unigene29852  | Potri.001G356800.1 | 64.478  | 156.9282 | -1.2832 | Down | 2.23E-120 | 6.02E-119 |
| Unigene19354  | Potri.018G133300.1 | 2.5956  | 6.3178   | -1.2834 | Down | 6.46E-05  | 1.26E-04  |
| Unigene16196  | Potri.009G011700.2 | 16.8974 | 41.1292  | -1.2834 | Down | 2.88E-19  | 1.25E-18  |
| Unigene7650   | Potri.003G105400.1 | 3.0657  | 7.4621   | -1.2834 | Down | 1.46E-08  | 3.83E-08  |
| Unigene13186  | Potri.001G140000.1 | 4.717   | 11.4815  | -1.2834 | Down | 1.46E-08  | 3.83E-08  |
| Unigene20313  | Potri.001G123500.1 | 2.7667  | 6.7343   | -1.2834 | Down | 6.46E-05  | 1.26E-04  |
| Unigene45973  | Potri.008G134600.1 | 11.1297 | 27.0926  | -1.2835 | Down | 7.86E-26  | 4.22E-25  |
| Unigene40609  | Potri.005G257400.4 | 20.8245 | 50.693   | -1.2835 | Down | 2.72E-22  | 1.30E-21  |
| Unigene33849  | Potri.006G084900.2 | 6.0211  | 14.6588  | -1.2837 | Down | 1.26E-11  | 3.92E-11  |
| Unigene42635  | Potri.003G163200.1 | 7.2988  | 17.7693  | -1.2837 | Down | 8.97E-22  | 4.23E-21  |
| Unigene60898  | Potri.016G002100.1 | 8.3258  | 20.272   | -1.2838 | Down | 4.95E-08  | 1.25E-07  |
| Unigene3197   | Potri.014G147400.9 | 2.7186  | 6.6194   | -1.2838 | Down | 4.95E-08  | 1.25E-07  |
| Unigene46562  | Potri.001G187200.1 | 5.4057  | 13.1621  | -1.2838 | Down | 4.95E-08  | 1.25E-07  |
| Unigene3143   | Potri.008G163500.1 | 5.6584  | 13.7778  | -1.2839 | Down | 7.93E-31  | 4.93E-30  |
| Unigene15377  | Potri.007G019400.3 | 17.0919 | 41.6238  | -1.2841 | Down | 8.90E-27  | 4.92E-26  |
| Unigene11679  | Potri.001G200600.1 | 12.135  | 29.5527  | -1.2841 | Down | 6.89E-55  | 7.42E-54  |
| Unigene36605  | Potri.016G063100.1 | 80.9433 | 197.155  | -1.2843 | Down | 2.39E-98  | 5.01E-97  |
| Unigene17629  | Potri.005G058200.1 | 27.9085 | 67.9728  | -1.2843 | Down | 2.83E-29  | 1.68E-28  |
| Unigene2522   | Potri.017G039100.1 | 4.0991  | 9.9846   | -1.2844 | Down | 1.01E-22  | 4.92E-22  |
| Unigene14979  | Potri.014G111600.1 | 2.4372  | 5.9365   | -1.2844 | Down | 2.27E-04  | 4.17E-04  |
| Unigene53471  | Potri.010G171100.1 | 6.8358  | 16.6504  | -1.2844 | Down | 1.68E-07  | 4.09E-07  |
| Unigene13027  | Potri.010G087400.1 | 8.9364  | 21.767   | -1.2844 | Down | 1.15E-16  | 4.48E-16  |

|               |                    |          |          |         |      |           |           |
|---------------|--------------------|----------|----------|---------|------|-----------|-----------|
| Unigene37129  | Potri.009G112100.3 | 14.0064  | 34.1164  | -1.2844 | Down | 1.25E-13  | 4.30E-13  |
| Unigene13224  | Potri.008G004800.1 | 7.5987   | 18.5087  | -1.2844 | Down | 9.01E-32  | 5.74E-31  |
| Unigene34142  | Potri.006G040600.2 | 8.3989   | 20.4579  | -1.2844 | Down | 1.01E-22  | 4.92E-22  |
| Unigene39116  | Potri.005G039000.2 | 1.8214   | 4.4366   | -1.2844 | Down | 2.27E-04  | 4.17E-04  |
| Unigene8287   | Potri.001G236200.1 | 2.8081   | 6.84     | -1.2844 | Down | 1.68E-07  | 4.09E-07  |
| Unigene38160  | Potri.006G096700.1 | 34.8335  | 84.8539  | -1.2845 | Down | 8.35E-61  | 1.01E-59  |
| Unigene18326  | Potri.001G367500.1 | 6.3629   | 15.5     | -1.2845 | Down | 3.06E-28  | 1.77E-27  |
| Unigene37823  | Potri.018G105200.2 | 18.5661  | 45.2309  | -1.2846 | Down | 3.80E-16  | 1.46E-15  |
| Unigene13161  | Potri.009G168500.1 | 7.2297   | 17.612   | -1.2846 | Down | 8.88E-43  | 7.43E-42  |
| Unigene71424  | Potri.008G114200.1 | 40.7906  | 99.3743  | -1.2846 | Down | 9.74E-31  | 6.04E-30  |
| Unigene25020  | Potri.003G128700.2 | 51.9967  | 126.6734 | -1.2846 | Down | 8.91E-63  | 1.11E-61  |
| Unigene24165  | Potri.018G123300.1 | 4.0176   | 9.7881   | -1.2847 | Down | 4.17E-13  | 1.40E-12  |
| Unigene32317  | Potri.008G135600.1 | 11.6851  | 28.4715  | -1.2848 | Down | 3.14E-41  | 2.54E-40  |
| Unigene109515 | Potri.016G133700.1 | 7.2864   | 17.7563  | -1.2851 | Down | 5.71E-07  | 1.34E-06  |
| Unigene43773  | Potri.017G041100.2 | 8.4436   | 20.5784  | -1.2852 | Down | 4.19E-15  | 1.53E-14  |
| Unigene48509  | Potri.014G100300.3 | 20.9365  | 51.0254  | -1.2852 | Down | 1.14E-28  | 6.68E-28  |
| Unigene24292  | Potri.012G062700.1 | 22.3364  | 54.4369  | -1.2852 | Down | 1.14E-28  | 6.68E-28  |
| Unigene43160  | Potri.010G202700.1 | 16.1483  | 39.356   | -1.2852 | Down | 2.60E-144 | 8.82E-143 |
| Unigene40313  | Potri.010G075000.1 | 10.9917  | 26.7901  | -1.2853 | Down | 1.59E-09  | 4.41E-09  |
| Unigene21773  | Potri.005G086800.1 | 2.4026   | 5.8559   | -1.2853 | Down | 1.59E-09  | 4.41E-09  |
| Unigene47848  | Potri.001G252000.1 | 8.8532   | 21.578   | -1.2853 | Down | 1.59E-09  | 4.41E-09  |
| Unigene21551  | Potri.011G166900.2 | 8.219    | 20.0338  | -1.2854 | Down | 3.86E-41  | 3.11E-40  |
| Unigene32450  | Potri.008G119700.1 | 39.738   | 96.8629  | -1.2854 | Down | 7.89E-117 | 2.05E-115 |
| Unigene911    | Potri.011G049500.1 | 16.3812  | 39.9313  | -1.2855 | Down | 3.93E-38  | 2.95E-37  |
| Unigene19218  | Potri.002G220200.1 | 177.1385 | 431.8056 | -1.2855 | Down | 5.60E-170 | 2.37E-168 |
| Unigene116429 | Potri.008G004200.1 | 16.0189  | 39.0515  | -1.2856 | Down | 1.32E-19  | 5.78E-19  |
| Unigene18770  | Potri.001G436500.1 | 10.118   | 24.6654  | -1.2856 | Down | 4.26E-17  | 1.70E-16  |
| Unigene2211   | Potri.016G066500.1 | 20.3612  | 49.6405  | -1.2857 | Down | 4.13E-32  | 2.66E-31  |
| Unigene32831  | Potri.009G025900.1 | 4.867    | 11.8657  | -1.2857 | Down | 4.13E-32  | 2.66E-31  |
| Unigene21917  | Potri.007G147100.2 | 11.3323  | 27.6273  | -1.2857 | Down | 1.29E-24  | 6.67E-24  |
| Unigene12158  | Potri.006G200300.1 | 18.5083  | 45.1245  | -1.2857 | Down | 1.42E-44  | 1.23E-43  |
| Unigene47267  | Potri.009G142800.1 | 5.2302   | 12.7525  | -1.2858 | Down | 1.95E-06  | 4.39E-06  |
| Unigene34786  | Potri.006G076600.3 | 6.5018   | 15.8529  | -1.2858 | Down | 4.35E-34  | 2.94E-33  |
| Unigene48072  | Potri.004G158400.1 | 15.6329  | 38.1168  | -1.2858 | Down | 1.41E-16  | 5.50E-16  |
| Unigene4304   | Potri.002G152100.1 | 19.2281  | 46.8827  | -1.2858 | Down | 4.35E-19  | 1.87E-18  |
| Unigene1241   | Potri.010G195500.1 | 2.7495   | 6.704    | -1.2859 | Down | 1.55E-11  | 4.81E-11  |
| Unigene20251  | Potri.017G057500.1 | 8.1789   | 19.9474  | -1.2862 | Down | 1.54E-13  | 5.27E-13  |
| Unigene10456  | Potri.001G089800.3 | 20.8877  | 50.9425  | -1.2862 | Down | 1.46E-25  | 7.77E-25  |
| Unigene13820  | Potri.018G085600.2 | 15.5553  | 37.9388  | -1.2863 | Down | 2.32E-63  | 2.92E-62  |

|               |                    |          |          |         |      |           |           |
|---------------|--------------------|----------|----------|---------|------|-----------|-----------|
| Unigene53605  | Potri.015G079800.1 | 39.3067  | 95.8678  | -1.2863 | Down | 1.54E-32  | 1.01E-31  |
| Unigene11066  | Potri.009G139500.1 | 21.2718  | 51.8827  | -1.2863 | Down | 3.01E-77  | 4.75E-76  |
| Unigene34674  | Potri.007G133900.1 | 15.2822  | 37.2754  | -1.2864 | Down | 2.33E-60  | 2.78E-59  |
| Unigene1227   | Potri.009G040200.1 | 10.6807  | 26.0548  | -1.2865 | Down | 5.01E-27  | 2.79E-26  |
| Unigene6407   | Potri.006G275500.3 | 5.4913   | 13.3951  | -1.2865 | Down | 1.81E-08  | 4.71E-08  |
| Unigene35983  | Potri.005G110600.4 | 15.6345  | 38.1399  | -1.2866 | Down | 4.89E-20  | 2.18E-19  |
| Unigene50870  | Potri.015G082500.1 | 8.4923   | 20.7205  | -1.2868 | Down | 5.16E-15  | 1.88E-14  |
| Unigene82253  | Potri.012G061600.1 | 4.8776   | 11.901   | -1.2868 | Down | 6.69E-06  | 1.44E-05  |
| Unigene99857  | Potri.010G106100.2 | 2.1941   | 5.3534   | -1.2868 | Down | 6.69E-06  | 1.44E-05  |
| Unigene6504   | Potri.010G029100.4 | 3.2518   | 7.934    | -1.2868 | Down | 6.69E-06  | 1.44E-05  |
| Unigene40829  | Potri.007G105100.1 | 10.5244  | 25.6785  | -1.2868 | Down | 1.74E-10  | 5.10E-10  |
| Unigene38976  | Potri.018G088200.1 | 2.6925   | 6.5696   | -1.2869 | Down | 6.69E-06  | 1.44E-05  |
| Unigene21706  | Potri.006G203500.1 | 24.5399  | 59.8821  | -1.287  | Down | 4.69E-120 | 1.27E-118 |
| Unigene74258  | Potri.006G266900.3 | 14.3994  | 35.1387  | -1.2871 | Down | 1.71E-12  | 5.58E-12  |
| Unigene116309 | Potri.006G126300.3 | 15.6303  | 38.1441  | -1.2871 | Down | 5.35E-19  | 2.30E-18  |
| Unigene34814  | Potri.019G069600.1 | 3.6554   | 8.9211   | -1.2872 | Down | 6.11E-08  | 1.54E-07  |
| Unigene38361  | Potri.017G109500.1 | 5.4073   | 13.1969  | -1.2872 | Down | 6.11E-08  | 1.54E-07  |
| Unigene28260  | Potri.008G009700.2 | 4.7596   | 11.616   | -1.2872 | Down | 6.11E-08  | 1.54E-07  |
| Unigene53389  | Potri.006G261300.1 | 17.6462  | 43.0684  | -1.2873 | Down | 1.96E-29  | 1.17E-28  |
| Unigene38182  | Potri.005G143100.1 | 16.6718  | 40.6926  | -1.2874 | Down | 5.91E-25  | 3.09E-24  |
| Unigene32777  | Potri.004G094600.1 | 38.7341  | 94.5472  | -1.2874 | Down | 1.49E-104 | 3.35E-103 |
| Unigene42544  | Potri.001G320300.1 | 6.4781   | 15.8124  | -1.2874 | Down | 5.22E-69  | 7.23E-68  |
| Unigene43250  | Potri.001G138100.1 | 11.8135  | 28.8349  | -1.2874 | Down | 8.14E-42  | 6.66E-41  |
| Unigene32306  | Potri.001G086400.5 | 4.6564   | 11.3658  | -1.2874 | Down | 6.16E-27  | 3.42E-26  |
| Unigene330    | Potri.010G142700.1 | 10.2078  | 24.9185  | -1.2875 | Down | 7.09E-33  | 4.66E-32  |
| Unigene19416  | Potri.009G073400.1 | 7.3667   | 17.9829  | -1.2875 | Down | 5.72E-12  | 1.81E-11  |
| Unigene72984  | Potri.007G014300.1 | 14.0989  | 34.417   | -1.2875 | Down | 5.72E-12  | 1.81E-11  |
| Unigene87472  | Potri.003G222800.2 | 37.2995  | 91.0526  | -1.2875 | Down | 2.83E-43  | 2.39E-42  |
| Unigene1972   | Potri.010G036700.1 | 8.5101   | 20.7754  | -1.2876 | Down | 5.71E-14  | 1.99E-13  |
| Unigene9447   | Potri.001G113800.1 | 38.7027  | 94.4793  | -1.2876 | Down | 3.00E-45  | 2.65E-44  |
| Unigene4120   | Potri.013G079900.1 | 20.6676  | 50.4621  | -1.2878 | Down | 6.43E-24  | 3.25E-23  |
| Unigene2725   | Potri.003G143200.1 | 10.5927  | 25.8648  | -1.2879 | Down | 8.48E-36  | 6.01E-35  |
| Unigene33668  | Potri.007G011100.2 | 18.8387  | 46.0007  | -1.288  | Down | 1.19E-47  | 1.11E-46  |
| Unigene864    | Potri.018G067500.1 | 1.5266   | 3.728    | -1.2881 | Down | 2.31E-05  | 4.72E-05  |
| Unigene47312  | Potri.018G005600.2 | 6.2864   | 15.3517  | -1.2881 | Down | 2.07E-07  | 5.02E-07  |
| Unigene84384  | Potri.015G131100.4 | 106.1293 | 259.1801 | -1.2881 | Down | 9.64E-106 | 2.21E-104 |
| Unigene117089 | Potri.015G031400.6 | 8.1086   | 19.8014  | -1.2881 | Down | 1.91E-11  | 5.91E-11  |
| Unigene118183 | Potri.014G126700.1 | 20.2715  | 49.5035  | -1.2881 | Down | 2.52E-31  | 1.59E-30  |
| Unigene15827  | Potri.005G210500.1 | 4.9788   | 12.1584  | -1.2881 | Down | 1.94E-17  | 7.85E-17  |

|               |                    |         |          |         |      |           |           |
|---------------|--------------------|---------|----------|---------|------|-----------|-----------|
| Unigene104696 | Potri.005G137500.1 | 4.3882  | 10.7161  | -1.2881 | Down | 1.96E-09  | 5.42E-09  |
| Unigene72282  | Potri.005G108000.2 | 10.8639 | 26.53    | -1.2881 | Down | 1.96E-09  | 5.42E-09  |
| Unigene94794  | Potri.005G024600.3 | 5.6705  | 13.8476  | -1.2881 | Down | 2.07E-07  | 5.02E-07  |
| Unigene103335 | Potri.004G160000.1 | 4.1079  | 10.0315  | -1.2881 | Down | 1.91E-11  | 5.91E-11  |
| Unigene7247   | Potri.003G178600.1 | 3.7053  | 9.0483   | -1.2881 | Down | 2.31E-05  | 4.72E-05  |
| Unigene5988   | Potri.003G043300.3 | 13.7019 | 33.4603  | -1.2881 | Down | 1.90E-13  | 6.47E-13  |
| Unigene29602  | Potri.002G248800.2 | 2.1355  | 5.2149   | -1.2881 | Down | 2.31E-05  | 4.72E-05  |
| Unigene81362  | Potri.008G004300.4 | 39.0617 | 95.4003  | -1.2882 | Down | 9.65E-37  | 7.01E-36  |
| Unigene24153  | Potri.005G251700.1 | 14.544  | 35.5197  | -1.2882 | Down | 1.36E-48  | 1.29E-47  |
| Unigene1428   | Potri.005G247900.4 | 11.5126 | 28.1163  | -1.2882 | Down | 1.45E-50  | 1.43E-49  |
| Unigene93668  | Potri.005G078600.2 | 97.8735 | 239.0271 | -1.2882 | Down | 2.21E-214 | 1.24E-212 |
| Unigene24072  | Potri.005G203100.8 | 6.8241  | 16.6677  | -1.2883 | Down | 7.00E-23  | 3.42E-22  |
| Unigene16536  | Potri.018G114500.6 | 13.0324 | 31.8335  | -1.2884 | Down | 6.44E-17  | 2.55E-16  |
| Unigene111245 | Potri.010G201600.3 | 21.1526 | 51.6667  | -1.2884 | Down | 6.58E-19  | 2.81E-18  |
| Unigene17480  | Potri.006G218600.1 | 23.7448 | 57.9993  | -1.2884 | Down | 3.01E-34  | 2.05E-33  |
| Unigene24521  | Potri.005G083100.4 | 37.2995 | 91.1161  | -1.2885 | Down | 6.24E-85  | 1.10E-83  |
| Unigene64829  | Potri.017G150500.3 | 7.5477  | 18.4379  | -1.2886 | Down | 6.33E-13  | 2.10E-12  |
| Unigene17268  | Potri.014G092300.1 | 6.8542  | 16.7438  | -1.2886 | Down | 6.33E-13  | 2.10E-12  |
| Unigene40837  | Potri.007G008000.1 | 54.7545 | 133.7641 | -1.2886 | Down | 3.87E-71  | 5.53E-70  |
| Unigene9182   | Potri.012G061300.3 | 4.2036  | 10.2696  | -1.2887 | Down | 6.40E-11  | 1.93E-10  |
| Unigene71083  | Potri.008G130000.1 | 26.2205 | 64.0576  | -1.2887 | Down | 2.24E-20  | 1.01E-19  |
| Unigene12173  | Potri.001G183100.1 | 5.5326  | 13.5163  | -1.2887 | Down | 8.97E-30  | 5.41E-29  |
| Unigene10668  | Potri.015G121400.3 | 4.7472  | 11.5989  | -1.2888 | Down | 3.10E-31  | 1.95E-30  |
| Unigene36810  | Potri.005G123500.1 | 57.8459 | 141.3293 | -1.2888 | Down | 4.74E-74  | 7.09E-73  |
| Unigene13767  | Potri.010G087600.3 | 12.5119 | 30.5713  | -1.2889 | Down | 1.19E-36  | 8.57E-36  |
| Unigene1691   | Potri.004G229900.1 | 31.7929 | 77.6839  | -1.2889 | Down | 4.59E-42  | 3.78E-41  |
| Unigene52922  | Potri.009G097000.2 | 13.8094 | 33.7433  | -1.289  | Down | 2.11E-14  | 7.50E-14  |
| Unigene12666  | Potri.T171400.1    | 2.8936  | 7.0714   | -1.2891 | Down | 2.11E-12  | 6.84E-12  |
| Unigene90028  | Potri.016G100600.4 | 4.1221  | 10.0734  | -1.2891 | Down | 7.06E-07  | 1.64E-06  |
| Unigene19488  | Potri.009G015100.1 | 53.1547 | 129.8953 | -1.2891 | Down | 3.64E-63  | 4.58E-62  |
| Unigene119180 | Potri.005G161800.2 | 2.5236  | 6.167    | -1.2891 | Down | 7.06E-07  | 1.64E-06  |
| Unigene34658  | Potri.004G046900.2 | 6.3987  | 15.6369  | -1.2891 | Down | 2.61E-23  | 1.29E-22  |
| Unigene74229  | Potri.002G246100.3 | 70.4354 | 172.1422 | -1.2892 | Down | 2.82E-55  | 3.06E-54  |
| Unigene32917  | Potri.017G093300.1 | 9.1356  | 22.3282  | -1.2893 | Down | 6.72E-48  | 6.29E-47  |
| Unigene38552  | Potri.011G168600.1 | 2.6558  | 6.4911   | -1.2893 | Down | 2.15E-10  | 6.25E-10  |
| Unigene32848  | Potri.005G193100.1 | 7.3814  | 18.041   | -1.2893 | Down | 2.49E-51  | 2.50E-50  |
| Unigene44658  | Potri.002G140200.1 | 42.335  | 103.4769 | -1.2894 | Down | 1.28E-61  | 1.56E-60  |
| Unigene51940  | Potri.018G013900.4 | 27.0461 | 66.1111  | -1.2895 | Down | 6.24E-70  | 8.76E-69  |
| Unigene44792  | Potri.008G110100.1 | 39.0497 | 95.4546  | -1.2895 | Down | 7.04E-96  | 1.43E-94  |

|              |                     |          |          |         |      |           |           |
|--------------|---------------------|----------|----------|---------|------|-----------|-----------|
| Unigene10746 | Potri.005G253400.1  | 8.7437   | 21.3733  | -1.2895 | Down | 2.08E-45  | 1.84E-44  |
| Unigene4930  | Potri.014G155800.2  | 49.5322  | 121.0957 | -1.2897 | Down | 6.26E-67  | 8.39E-66  |
| Unigene76165 | Potri.012G092800.1  | 4.3294   | 10.5845  | -1.2897 | Down | 8.03E-05  | 1.55E-04  |
| Unigene14399 | Potri.003G090400.12 | 3.6874   | 9.0149   | -1.2897 | Down | 8.03E-05  | 1.55E-04  |
| Unigene53646 | Potri.001G467800.3  | 20.9006  | 51.0976  | -1.2897 | Down | 8.09E-19  | 3.45E-18  |
| Unigene61354 | Potri.003G153400.5  | 3.3139   | 8.1029   | -1.2899 | Down | 2.75E-20  | 1.24E-19  |
| Unigene2445  | Potri.013G027300.1  | 10.8173  | 26.4516  | -1.29   | Down | 1.49E-33  | 9.97E-33  |
| Unigene23567 | Potri.010G215200.8  | 29.4999  | 72.1337  | -1.29   | Down | 3.49E-52  | 3.56E-51  |
| Unigene40485 | Potri.005G193100.1  | 14.7869  | 36.1577  | -1.29   | Down | 3.33E-25  | 1.75E-24  |
| Unigene22028 | Potri.001G207700.1  | 12.7998  | 31.299   | -1.29   | Down | 4.52E-57  | 5.09E-56  |
| Unigene70245 | Potri.017G088700.2  | 6.596    | 16.1307  | -1.2901 | Down | 1.42E-31  | 9.01E-31  |
| Unigene59946 | Potri.008G026600.1  | 2.8762   | 7.0336   | -1.2901 | Down | 7.20E-10  | 2.04E-09  |
| Unigene2590  | Potri.009G058100.1  | 10.064   | 24.613   | -1.2902 | Down | 2.91E-46  | 2.63E-45  |
| Unigene73500 | Potri.004G214300.1  | 143.3646 | 350.6207 | -1.2902 | Down | 8.60E-109 | 2.04E-107 |
| Unigene31472 | Potri.001G053500.1  | 11.4768  | 28.0678  | -1.2902 | Down | 7.82E-15  | 2.83E-14  |
| Unigene4026  | Potri.008G097500.1  | 72.6145  | 177.5947 | -1.2903 | Down | 7.64E-166 | 3.14E-164 |
| Unigene51817 | Potri.019G082500.1  | 2.4956   | 6.1041   | -1.2904 | Down | 2.41E-06  | 5.38E-06  |
| Unigene81226 | Potri.019G064600.1  | 10.9097  | 26.6842  | -1.2904 | Down | 2.36E-11  | 7.25E-11  |
| Unigene21023 | Potri.014G041200.1  | 4.4663   | 10.9241  | -1.2904 | Down | 2.41E-06  | 5.38E-06  |
| Unigene281   | Potri.009G065300.3  | 4.4233   | 10.8191  | -1.2904 | Down | 3.10E-21  | 1.44E-20  |
| Unigene9396  | Potri.001G025100.7  | 6.1887   | 15.137   | -1.2904 | Down | 2.41E-06  | 5.38E-06  |
| Unigene13482 | Potri.016G082500.1  | 3.7391   | 9.1465   | -1.2905 | Down | 8.87E-18  | 3.63E-17  |
| Unigene22357 | Potri.001G068800.2  | 11.0267  | 26.972   | -1.2905 | Down | 1.29E-27  | 7.34E-27  |
| Unigene54420 | Potri.015G042500.1  | 5.5489   | 13.5749  | -1.2907 | Down | 5.96E-56  | 6.57E-55  |
| Unigene37820 | Potri.014G114300.2  | 8.1381   | 19.9099  | -1.2907 | Down | 7.55E-08  | 1.89E-07  |
| Unigene54057 | Potri.010G065700.1  | 2.1545   | 5.271    | -1.2907 | Down | 7.55E-08  | 1.89E-07  |
| Unigene11520 | Potri.008G181500.1  | 3.9134   | 9.5742   | -1.2907 | Down | 2.60E-14  | 9.18E-14  |
| Unigene28793 | Potri.001G021500.1  | 6.0486   | 14.7979  | -1.2907 | Down | 2.60E-14  | 9.18E-14  |
| Unigene18575 | Potri.014G046000.1  | 7.4183   | 18.1506  | -1.2909 | Down | 8.72E-16  | 3.28E-15  |
| Unigene23677 | Potri.004G163000.1  | 6.0792   | 14.8752  | -1.291  | Down | 2.42E-09  | 6.66E-09  |
| Unigene5689  | Potri.016G089300.1  | 43.6624  | 106.8454 | -1.2911 | Down | 2.10E-54  | 2.23E-53  |
| Unigene8280  | Potri.001G004300.2  | 3.8397   | 9.3962   | -1.2911 | Down | 7.89E-11  | 2.36E-10  |
| Unigene40809 | Potri.013G079900.1  | 14.4787  | 35.4332  | -1.2912 | Down | 1.15E-21  | 5.42E-21  |
| Unigene7006  | Potri.008G162600.1  | 21.5292  | 52.6894  | -1.2912 | Down | 6.85E-34  | 4.61E-33  |
| Unigene31450 | Potri.004G150300.2  | 9.3249   | 22.8212  | -1.2912 | Down | 2.60E-12  | 8.38E-12  |
| Unigene50754 | Potri.018G059400.1  | 4.6751   | 11.4424  | -1.2913 | Down | 8.65E-14  | 2.99E-13  |
| Unigene37660 | Potri.011G084800.1  | 6.1094   | 14.954   | -1.2914 | Down | 9.74E-17  | 3.83E-16  |
| Unigene75782 | Potri.006G139300.1  | 40.1558  | 98.2908  | -1.2914 | Down | 2.25E-33  | 1.50E-32  |
| Unigene2349  | Potri.012G100500.1  | 9.9661   | 24.3953  | -1.2915 | Down | 9.34E-38  | 6.94E-37  |



|               |                    |         |          |         |      |          |          |
|---------------|--------------------|---------|----------|---------|------|----------|----------|
| Unigene8824   | Potri.004G219000.2 | 16.9221 | 41.4261  | -1.2916 | Down | 5.24E-27 | 2.91E-26 |
| Unigene18059  | Potri.001G394600.2 | 16.39   | 40.1265  | -1.2917 | Down | 1.28E-41 | 1.04E-40 |
| Unigene43646  | Potri.004G092500.1 | 19.6139 | 48.0204  | -1.2918 | Down | 6.52E-49 | 6.23E-48 |
| Unigene14559  | Potri.016G089300.1 | 19.1727 | 46.9453  | -1.2919 | Down | 3.23E-16 | 1.24E-15 |
| Unigene36232  | Potri.014G159300.4 | 2.8559  | 6.9928   | -1.2919 | Down | 8.29E-06 | 1.76E-05 |
| Unigene30367  | Potri.014G067400.1 | 1.3768  | 3.3712   | -1.2919 | Down | 2.82E-04 | 5.15E-04 |
| Unigene13431  | Potri.011G152700.3 | 8.6111  | 21.0848  | -1.2919 | Down | 1.73E-26 | 9.45E-26 |
| Unigene104091 | Potri.009G087700.1 | 1.8821  | 4.6084   | -1.2919 | Down | 2.82E-04 | 5.15E-04 |
| Unigene81549  | Potri.008G118700.1 | 33.789  | 82.7342  | -1.2919 | Down | 2.43E-32 | 1.58E-31 |
| Unigene18411  | Potri.007G060300.1 | 5.0793  | 12.437   | -1.2919 | Down | 9.62E-15 | 3.47E-14 |
| Unigene61482  | Potri.007G047800.1 | 1.7312  | 4.2389   | -1.2919 | Down | 2.82E-04 | 5.15E-04 |
| Unigene45007  | Potri.006G267300.1 | 13.7639 | 33.7017  | -1.2919 | Down | 2.43E-32 | 1.58E-31 |
| Unigene38301  | Potri.006G126600.1 | 6.8611  | 16.7998  | -1.2919 | Down | 8.16E-09 | 2.17E-08 |
| Unigene17617  | Potri.005G087500.1 | 3.2911  | 8.0585   | -1.2919 | Down | 8.29E-06 | 1.76E-05 |
| Unigene13487  | Potri.002G216400.8 | 1.6379  | 4.0105   | -1.2919 | Down | 2.56E-07 | 6.18E-07 |
| Unigene4059   | Potri.002G068700.1 | 8.8426  | 21.6515  | -1.2919 | Down | 8.16E-09 | 2.17E-08 |
| Unigene31169  | Potri.001G010500.2 | 4.9582  | 12.1405  | -1.2919 | Down | 3.70E-19 | 1.60E-18 |
| Unigene69970  | Potri.014G095300.1 | 1.6989  | 4.16     | -1.292  | Down | 2.82E-04 | 5.15E-04 |
| Unigene14068  | Potri.011G045300.9 | 3.4049  | 8.3372   | -1.292  | Down | 2.82E-04 | 5.15E-04 |
| Unigene22096  | Potri.006G047700.2 | 11.4768 | 28.109   | -1.2923 | Down | 1.57E-41 | 1.28E-40 |
| Unigene4392   | Potri.016G023700.1 | 32.5088 | 79.6331  | -1.2925 | Down | 6.43E-27 | 3.57E-26 |
| Unigene107726 | Potri.013G072000.1 | 17.5419 | 42.9703  | -1.2925 | Down | 3.20E-14 | 1.13E-13 |
| Unigene18096  | Potri.012G036400.1 | 11.4636 | 28.0805  | -1.2925 | Down | 2.21E-28 | 1.28E-27 |
| Unigene52133  | Potri.005G179700.1 | 12.5211 | 30.6714  | -1.2925 | Down | 3.20E-14 | 1.13E-13 |
| Unigene114198 | Potri.001G253900.1 | 26.6425 | 65.2632  | -1.2925 | Down | 6.43E-27 | 3.57E-26 |
| Unigene49909  | Potri.019G033800.2 | 3.5645  | 8.7319   | -1.2926 | Down | 9.60E-13 | 3.16E-12 |
| Unigene25844  | Potri.011G146400.1 | 4.5874  | 11.2377  | -1.2926 | Down | 9.60E-13 | 3.16E-12 |
| Unigene21817  | Potri.010G103400.2 | 10.228  | 25.0556  | -1.2926 | Down | 3.57E-35 | 2.48E-34 |
| Unigene1039   | Potri.008G043500.1 | 2.8304  | 6.9342   | -1.2927 | Down | 2.90E-11 | 8.89E-11 |
| Unigene28977  | Potri.010G124700.1 | 7.0084  | 17.1704  | -1.2928 | Down | 2.51E-29 | 1.49E-28 |
| Unigene45355  | Potri.004G084700.1 | 3.8191  | 9.3571   | -1.2928 | Down | 7.29E-28 | 4.16E-27 |
| Unigene42392  | Potri.003G031900.1 | 23.8389 | 58.4041  | -1.2928 | Down | 0        | 0        |
| Unigene22527  | Potri.001G111800.1 | 22.1659 | 54.3076  | -1.2928 | Down | 4.75E-54 | 5.04E-53 |
| Unigene49260  | Potri.011G141200.1 | 4.0786  | 9.9931   | -1.2929 | Down | 8.88E-10 | 2.50E-09 |
| Unigene87215  | Potri.005G110900.2 | 44.4725 | 108.9637 | -1.2929 | Down | 3.91E-51 | 3.91E-50 |
| Unigene3054   | Potri.003G113900.1 | 5.7242  | 14.025   | -1.2929 | Down | 8.88E-10 | 2.50E-09 |
| Unigene79713  | Potri.002G233700.4 | 18.9555 | 46.4436  | -1.2929 | Down | 4.05E-18 | 1.68E-17 |
| Unigene83524  | Potri.017G076000.3 | 29.7015 | 72.7799  | -1.293  | Down | 2.85E-30 | 1.74E-29 |
| Unigene33839  | Potri.014G115600.2 | 16.9186 | 41.4569  | -1.293  | Down | 2.85E-30 | 1.74E-29 |

|               |                    |         |          |         |      |           |           |
|---------------|--------------------|---------|----------|---------|------|-----------|-----------|
| Unigene49169  | Potri.002G008800.3 | 4.2462  | 10.4051  | -1.293  | Down | 2.75E-08  | 7.09E-08  |
| Unigene28934  | Potri.005G147700.1 | 6.4539  | 15.815   | -1.2931 | Down | 8.26E-29  | 4.85E-28  |
| Unigene24911  | Potri.002G182100.1 | 5.6364  | 13.8118  | -1.2931 | Down | 3.56E-15  | 1.31E-14  |
| Unigene7790   | Potri.011G059300.2 | 5.8792  | 14.4082  | -1.2932 | Down | 5.26E-38  | 3.94E-37  |
| Unigene7058   | Potri.003G111600.1 | 6.0325  | 14.7834  | -1.2932 | Down | 1.55E-20  | 7.01E-20  |
| Unigene44656  | Potri.002G234500.1 | 14.0814 | 34.5106  | -1.2932 | Down | 4.55E-19  | 1.96E-18  |
| Unigene32546  | Potri.019G082400.1 | 3.8503  | 9.437    | -1.2934 | Down | 3.20E-12  | 1.03E-11  |
| Unigene38992  | Potri.009G165600.1 | 3.5951  | 8.8117   | -1.2934 | Down | 8.73E-07  | 2.02E-06  |
| Unigene12529  | Potri.008G038300.1 | 2.6548  | 6.5069   | -1.2934 | Down | 8.73E-07  | 2.02E-06  |
| Unigene91482  | Potri.005G123600.1 | 87.2086 | 213.7511 | -1.2934 | Down | 4.96E-133 | 1.52E-131 |
| Unigene39911  | Potri.003G205100.1 | 3.4778  | 8.5241   | -1.2934 | Down | 8.73E-07  | 2.02E-06  |
| Unigene31650  | Potri.002G068400.1 | 4.6479  | 11.3921  | -1.2934 | Down | 8.73E-07  | 2.02E-06  |
| Unigene42316  | Potri.002G045900.2 | 7.4044  | 18.1482  | -1.2934 | Down | 3.20E-12  | 1.03E-11  |
| Unigene5688   | Potri.007G092400.1 | 35.9078 | 88.0176  | -1.2935 | Down | 4.99E-36  | 3.55E-35  |
| Unigene623    | Potri.004G182900.2 | 7.0927  | 17.3858  | -1.2935 | Down | 1.57E-50  | 1.55E-49  |
| Unigene43649  | Potri.002G038300.1 | 4.3717  | 10.7161  | -1.2935 | Down | 3.98E-16  | 1.52E-15  |
| Unigene24502  | Potri.019G034300.2 | 43.7606 | 107.2744 | -1.2936 | Down | 2.49E-148 | 8.82E-147 |
| Unigene16778  | Potri.001G357000.2 | 10.1726 | 24.9371  | -1.2936 | Down | 9.72E-11  | 2.89E-10  |
| Unigene85313  | Potri.003G056300.2 | 33.0108 | 80.9305  | -1.2937 | Down | 1.64E-35  | 1.15E-34  |
| Unigene31933  | Potri.002G076900.2 | 6.5315  | 16.0132  | -1.2938 | Down | 3.98E-60  | 4.75E-59  |
| Unigene9784   | Potri.T042200.1    | 2.6774  | 6.5649   | -1.2939 | Down | 2.86E-05  | 5.79E-05  |
| Unigene31649  | Potri.014G109200.1 | 3.2225  | 7.9014   | -1.2939 | Down | 3.54E-13  | 1.19E-12  |
| Unigene26516  | Potri.013G022500.1 | 20.3325 | 49.8538  | -1.2939 | Down | 5.75E-21  | 2.64E-20  |
| Unigene65820  | Potri.008G148100.2 | 2.9314  | 7.1876   | -1.2939 | Down | 2.86E-05  | 5.79E-05  |
| Unigene39067  | Potri.004G200100.1 | 7.7819  | 19.0807  | -1.2939 | Down | 3.54E-13  | 1.19E-12  |
| Unigene100636 | Potri.003G181000.1 | 1.4233  | 3.4898   | -1.2939 | Down | 2.86E-05  | 5.79E-05  |
| Unigene91277  | Potri.003G008300.3 | 74.9604 | 183.8011 | -1.2939 | Down | 4.51E-112 | 1.11E-110 |
| Unigene92093  | Potri.001G309800.1 | 31.8071 | 77.9858  | -1.2939 | Down | 2.35E-53  | 2.45E-52  |
| Unigene1232   | Potri.009G093500.1 | 17.0564 | 41.8238  | -1.294  | Down | 2.08E-64  | 2.68E-63  |
| Unigene12426  | Potri.008G136600.1 | 10.4305 | 25.5765  | -1.294  | Down | 5.38E-35  | 3.73E-34  |
| Unigene93733  | Potri.008G080900.1 | 1.7142  | 4.2032   | -1.294  | Down | 2.86E-05  | 5.79E-05  |
| Unigene42966  | Potri.013G131100.2 | 15.1918 | 37.255   | -1.2941 | Down | 8.78E-54  | 9.27E-53  |
| Unigene37650  | Potri.006G133300.2 | 19.0119 | 46.6226  | -1.2941 | Down | 1.32E-15  | 4.93E-15  |
| Unigene7725   | Potri.017G094900.1 | 6.1985  | 15.2013  | -1.2942 | Down | 4.50E-32  | 2.90E-31  |
| Unigene24438  | Potri.004G158400.1 | 17.5527 | 43.0467  | -1.2942 | Down | 3.32E-42  | 2.74E-41  |
| Unigene19031  | Potri.002G173200.1 | 5.5475  | 13.6048  | -1.2942 | Down | 1.07E-11  | 3.34E-11  |
| Unigene6680   | Potri.001G275600.1 | 7.4599  | 18.2948  | -1.2942 | Down | 1.07E-11  | 3.34E-11  |
| Unigene5701   | Potri.019G093600.4 | 14.8956 | 36.532   | -1.2943 | Down | 4.98E-18  | 2.06E-17  |
| Unigene37915  | Potri.019G032800.6 | 5.8894  | 14.444   | -1.2943 | Down | 4.98E-18  | 2.06E-17  |

|               |                    |         |          |         |      |          |          |
|---------------|--------------------|---------|----------|---------|------|----------|----------|
| Unigene3600   | Potri.007G096900.2 | 9.3249  | 22.8696  | -1.2943 | Down | 4.98E-18 | 2.06E-17 |
| Unigene5767   | Potri.005G090100.2 | 34.4426 | 84.4744  | -1.2943 | Down | 1.30E-30 | 8.06E-30 |
| Unigene39230  | Potri.014G029300.1 | 16.3118 | 40.0095  | -1.2944 | Down | 1.09E-41 | 8.88E-41 |
| Unigene40956  | Potri.013G152900.1 | 8.1539  | 19.9991  | -1.2944 | Down | 9.33E-08 | 2.32E-07 |
| Unigene104499 | Potri.008G160900.1 | 4.5358  | 11.125   | -1.2944 | Down | 3.94E-14 | 1.38E-13 |
| Unigene101792 | Potri.004G066100.1 | 8.4283  | 20.6722  | -1.2944 | Down | 9.33E-08 | 2.32E-07 |
| Unigene49214  | Potri.003G175800.1 | 1.8167  | 4.4558   | -1.2944 | Down | 9.33E-08 | 2.32E-07 |
| Unigene46011  | Potri.011G003400.1 | 45.0528 | 110.5093 | -1.2945 | Down | 5.24E-59 | 6.12E-58 |
| Unigene32903  | Potri.007G011800.4 | 16.7779 | 41.1562  | -1.2945 | Down | 5.81E-34 | 3.92E-33 |
| Unigene53367  | Potri.003G063700.1 | 15.2458 | 37.396   | -1.2945 | Down | 7.31E-23 | 3.57E-22 |
| Unigene41807  | Potri.019G077000.2 | 37.8544 | 92.8577  | -1.2946 | Down | 1.71E-83 | 2.95E-82 |
| Unigene25092  | Potri.012G080800.4 | 16.877  | 41.4076  | -1.2948 | Down | 1.65E-17 | 6.68E-17 |
| Unigene11819  | Potri.001G142400.1 | 10.0354 | 24.6214  | -1.2948 | Down | 6.40E-47 | 5.86E-46 |
| Unigene38319  | Potri.015G130600.1 | 26.2997 | 64.5333  | -1.295  | Down | 8.55E-37 | 6.22E-36 |
| Unigene46247  | Potri.013G118000.6 | 6.1879  | 15.1852  | -1.2951 | Down | 2.99E-06 | 6.61E-06 |
| Unigene28609  | Potri.013G116200.1 | 4.439   | 10.8932  | -1.2951 | Down | 3.58E-11 | 1.09E-10 |
| Unigene118757 | Potri.013G070200.1 | 2.7801  | 6.8223   | -1.2951 | Down | 2.99E-06 | 6.61E-06 |
| Unigene67504  | Potri.013G064800.3 | 3.4878  | 8.5589   | -1.2951 | Down | 2.99E-06 | 6.61E-06 |
| Unigene22584  | Potri.006G200400.1 | 1.9461  | 4.7756   | -1.2951 | Down | 2.99E-06 | 6.61E-06 |
| Unigene23980  | Potri.006G126600.1 | 8.0406  | 19.7317  | -1.2951 | Down | 1.05E-25 | 5.63E-25 |
| Unigene42739  | Potri.003G143000.1 | 9.8928  | 24.2769  | -1.2951 | Down | 9.73E-38 | 7.23E-37 |
| Unigene43325  | Potri.001G073800.2 | 20.5008 | 50.3068  | -1.2951 | Down | 5.60E-80 | 9.18E-79 |
| Unigene26785  | Potri.011G041900.2 | 26.9485 | 66.1422  | -1.2954 | Down | 7.96E-22 | 3.76E-21 |
| Unigene10776  | Potri.009G099000.1 | 13.2007 | 32.4005  | -1.2954 | Down | 2.06E-90 | 3.88E-89 |
| Unigene762    | Potri.002G100300.1 | 18.278  | 44.8657  | -1.2955 | Down | 4.72E-64 | 6.03E-63 |
| Unigene26492  | Potri.002G045200.5 | 14.1885 | 34.8272  | -1.2955 | Down | 1.46E-14 | 5.21E-14 |
| Unigene901    | Potri.001G289200.1 | 5.0093  | 12.2963  | -1.2955 | Down | 2.58E-46 | 2.33E-45 |
| Unigene44091  | Potri.001G111100.1 | 19.308  | 47.3949  | -1.2955 | Down | 3.47E-25 | 1.83E-24 |
| Unigene41235  | Potri.016G100500.1 | 26.4275 | 64.873   | -1.2956 | Down | 8.98E-23 | 4.37E-22 |
| Unigene46344  | Potri.011G119000.4 | 6.8368  | 16.7827  | -1.2956 | Down | 3.94E-12 | 1.26E-11 |
| Unigene53178  | Potri.008G037100.2 | 12.1763 | 29.8898  | -1.2956 | Down | 3.94E-12 | 1.26E-11 |
| Unigene8281   | Potri.007G094900.1 | 10.1594 | 24.9398  | -1.2956 | Down | 2.34E-20 | 1.05E-19 |
| Unigene28711  | Potri.006G235500.1 | 7.1928  | 17.6571  | -1.2956 | Down | 2.34E-20 | 1.05E-19 |
| Unigene2247   | Potri.015G091000.2 | 5.2185  | 12.8113  | -1.2957 | Down | 1.09E-09 | 3.07E-09 |
| Unigene797    | Potri.008G164700.1 | 2.5651  | 6.2973   | -1.2957 | Down | 1.09E-09 | 3.07E-09 |
| Unigene23537  | Potri.006G264700.1 | 8.8515  | 21.7294  | -1.2957 | Down | 1.53E-28 | 8.90E-28 |
| Unigene29076  | Potri.006G229400.1 | 5.3348  | 13.0967  | -1.2957 | Down | 6.12E-18 | 2.52E-17 |
| Unigene27905  | Potri.010G090200.3 | 13.8168 | 33.9242  | -1.2959 | Down | 7.71E-33 | 5.06E-32 |
| Unigene10838  | Potri.005G171800.1 | 4.4594  | 10.9494  | -1.2959 | Down | 3.45E-36 | 2.47E-35 |

|               |                    |         |          |         |      |           |           |
|---------------|--------------------|---------|----------|---------|------|-----------|-----------|
| Unigene68514  | Potri.007G126900.2 | 5.2074  | 12.7862  | -1.296  | Down | 3.17E-07  | 7.57E-07  |
| Unigene49168  | Potri.006G153900.3 | 19.5595 | 48.0262  | -1.296  | Down | 1.97E-30  | 1.21E-29  |
| Unigene20377  | Potri.005G210800.1 | 5.0278  | 12.3453  | -1.296  | Down | 3.17E-07  | 7.57E-07  |
| Unigene48125  | Potri.002G031900.1 | 7.9009  | 19.3998  | -1.296  | Down | 3.17E-07  | 7.57E-07  |
| Unigene23505  | Potri.016G012500.1 | 10.6768 | 26.2175  | -1.2961 | Down | 2.96E-22  | 1.42E-21  |
| Unigene11746  | Potri.005G124300.2 | 7.3235  | 17.9843  | -1.2961 | Down | 9.96E-35  | 6.85E-34  |
| Unigene115801 | Potri.012G109800.1 | 28.5672 | 70.1561  | -1.2962 | Down | 2.54E-32  | 1.64E-31  |
| Unigene28251  | Potri.010G060800.1 | 14.4112 | 35.3904  | -1.2962 | Down | 7.72E-20  | 3.42E-19  |
| Unigene73721  | Potri.007G144900.2 | 11.964  | 29.3807  | -1.2962 | Down | 1.20E-10  | 3.54E-10  |
| Unigene45055  | Potri.011G096100.1 | 22.1416 | 54.3783  | -1.2963 | Down | 5.09E-39  | 3.90E-38  |
| Unigene11582  | Potri.010G152400.3 | 8.5608  | 21.0265  | -1.2964 | Down | 9.31E-66  | 1.23E-64  |
| Unigene96117  | Potri.003G100600.4 | 4.7051  | 11.5565  | -1.2964 | Down | 1.66E-27  | 9.36E-27  |
| Unigene11292  | Potri.001G347000.1 | 13.1607 | 32.3236  | -1.2964 | Down | 9.74E-56  | 1.07E-54  |
| Unigene21878  | Potri.014G179100.1 | 11.2329 | 27.5911  | -1.2965 | Down | 1.27E-57  | 1.45E-56  |
| Unigene70100  | Potri.013G009200.1 | 1.783   | 4.3796   | -1.2965 | Down | 9.97E-05  | 1.92E-04  |
| Unigene30314  | Potri.010G089700.1 | 35.865  | 88.0983  | -1.2965 | Down | 2.80E-105 | 6.35E-104 |
| Unigene16128  | Potri.003G137900.2 | 5.6005  | 13.7571  | -1.2965 | Down | 3.40E-08  | 8.71E-08  |
| Unigene21204  | Potri.003G126600.1 | 6.3348  | 15.5604  | -1.2965 | Down | 1.16E-87  | 2.11E-86  |
| Unigene49268  | Potri.003G070500.4 | 11.1276 | 27.3336  | -1.2965 | Down | 2.27E-18  | 9.52E-18  |
| Unigene39813  | Potri.001G278800.2 | 32.4817 | 79.7844  | -1.2965 | Down | 1.27E-57  | 1.45E-56  |
| Unigene29266  | Potri.006G252500.1 | 33.2915 | 81.7804  | -1.2966 | Down | 3.65E-56  | 4.04E-55  |
| Unigene103144 | Potri.003G082200.1 | 1.5698  | 3.8562   | -1.2966 | Down | 9.97E-05  | 1.92E-04  |
| Unigene21363  | Potri.004G203500.1 | 6.1224  | 15.0406  | -1.2967 | Down | 9.78E-44  | 8.35E-43  |
| Unigene39621  | Potri.003G017400.2 | 9.211   | 22.628   | -1.2967 | Down | 4.82E-26  | 2.60E-25  |
| Unigene2226   | Potri.008G024500.1 | 6.8233  | 16.7636  | -1.2968 | Down | 1.20E-55  | 1.31E-54  |
| Unigene35637  | Potri.006G209100.2 | 6.6491  | 16.3362  | -1.2968 | Down | 1.45E-12  | 4.75E-12  |
| Unigene7077   | Potri.002G059800.1 | 36.1724 | 88.8711  | -1.2968 | Down | 5.77E-49  | 5.51E-48  |
| Unigene34783  | Potri.015G035300.1 | 5.5848  | 13.7218  | -1.2969 | Down | 2.74E-31  | 1.73E-30  |
| Unigene44221  | Potri.004G219300.2 | 22.7188 | 55.8209  | -1.2969 | Down | 1.45E-46  | 1.32E-45  |
| Unigene47971  | Potri.001G335600.2 | 22.9409 | 56.366   | -1.2969 | Down | 6.24E-39  | 4.77E-38  |
| Unigene27147  | Potri.005G079600.1 | 69.5935 | 171.0046 | -1.297  | Down | 2.04E-59  | 2.41E-58  |
| Unigene20515  | Potri.T173300.1    | 17.0239 | 41.8338  | -1.2971 | Down | 1.59E-25  | 8.45E-25  |
| Unigene2262   | Potri.001G078700.1 | 33.6518 | 82.6952  | -1.2971 | Down | 2.29E-89  | 4.26E-88  |
| Unigene1445   | Potri.019G068400.1 | 11.0725 | 27.2116  | -1.2972 | Down | 9.02E-31  | 5.59E-30  |
| Unigene10484  | Potri.008G200700.3 | 14.606  | 35.8936  | -1.2972 | Down | 7.53E-18  | 3.09E-17  |
| Unigene54255  | Potri.006G225700.1 | 87.6056 | 215.2862 | -1.2972 | Down | 9.64E-111 | 2.35E-109 |
| Unigene54265  | Potri.T037100.1    | 11.2602 | 27.6747  | -1.2973 | Down | 4.02E-10  | 1.16E-09  |
| Unigene5564   | Potri.004G117000.3 | 2.9255  | 7.19     | -1.2973 | Down | 1.03E-05  | 2.17E-05  |
| Unigene23181  | Potri.001G060800.1 | 9.1814  | 22.5655  | -1.2973 | Down | 8.45E-19  | 3.59E-18  |

|               |                    |         |          |         |      |           |           |
|---------------|--------------------|---------|----------|---------|------|-----------|-----------|
| Unigene20115  | Potri.015G143300.3 | 32.8434 | 80.726   | -1.2974 | Down | 2.31E-28  | 1.33E-27  |
| Unigene20446  | Potri.002G241800.1 | 10.4683 | 25.7317  | -1.2975 | Down | 2.00E-15  | 7.41E-15  |
| Unigene22582  | Potri.001G219100.1 | 3.8215  | 9.3939   | -1.2976 | Down | 4.41E-11  | 1.34E-10  |
| Unigene34827  | Potri.005G074700.1 | 7.5376  | 18.53    | -1.2977 | Down | 5.84E-46  | 5.24E-45  |
| Unigene46550  | Potri.011G057100.1 | 4.2411  | 10.4271  | -1.2978 | Down | 1.08E-06  | 2.47E-06  |
| Unigene836    | Potri.004G177400.3 | 13.9426 | 34.2794  | -1.2978 | Down | 8.69E-49  | 8.27E-48  |
| Unigene2484   | Potri.004G099300.1 | 7.724   | 18.9902  | -1.2978 | Down | 2.49E-17  | 1.00E-16  |
| Unigene45060  | Potri.002G237600.1 | 3.3136  | 8.1469   | -1.2979 | Down | 1.08E-06  | 2.47E-06  |
| Unigene38446  | Potri.015G147000.1 | 8.6154  | 21.1846  | -1.298  | Down | 5.37E-13  | 1.79E-12  |
| Unigene12868  | Potri.008G080900.1 | 46.1829 | 113.5794 | -1.2983 | Down | 2.15E-117 | 5.64E-116 |
| Unigene46417  | Potri.001G015600.1 | 39.3673 | 96.8215  | -1.2983 | Down | 3.88E-68  | 5.30E-67  |
| Unigene54322  | Potri.018G125300.1 | 36.9392 | 90.8535  | -1.2984 | Down | 3.21E-29  | 1.91E-28  |
| Unigene25521  | Potri.006G257700.1 | 9.4362  | 23.2096  | -1.2984 | Down | 7.40E-16  | 2.80E-15  |
| Unigene38803  | Potri.005G233800.4 | 33.5562 | 82.5309  | -1.2984 | Down | 2.10E-35  | 1.47E-34  |
| Unigene79800  | Potri.003G214300.1 | 40.5098 | 99.6395  | -1.2984 | Down | 2.71E-37  | 1.99E-36  |
| Unigene2815   | Potri.010G029200.2 | 14.7288 | 36.2317  | -1.2986 | Down | 4.56E-41  | 3.67E-40  |
| Unigene37414  | Potri.009G036700.1 | 20.722  | 50.9757  | -1.2986 | Down | 9.26E-18  | 3.79E-17  |
| Unigene74041  | Potri.002G138300.3 | 30.1534 | 74.1736  | -1.2986 | Down | 6.43E-25  | 3.36E-24  |
| Unigene1570   | Potri.013G086700.3 | 13.6497 | 33.5794  | -1.2987 | Down | 8.23E-27  | 4.56E-26  |
| Unigene28908  | Potri.017G139700.1 | 5.922   | 14.5695  | -1.2988 | Down | 1.06E-28  | 6.18E-28  |
| Unigene41283  | Potri.006G270200.1 | 11.2202 | 27.6069  | -1.2989 | Down | 1.62E-11  | 5.02E-11  |
| Unigene79094  | Potri.003G043300.3 | 21.9135 | 53.9152  | -1.2989 | Down | 1.31E-20  | 5.96E-20  |
| Unigene19284  | Potri.008G221900.1 | 9.1832  | 22.5965  | -1.299  | Down | 1.79E-12  | 5.82E-12  |
| Unigene13932  | Potri.005G078400.1 | 20.5528 | 50.5732  | -1.299  | Down | 2.88E-45  | 2.55E-44  |
| Unigene14570  | Potri.016G125300.1 | 45.8965 | 112.9369 | -1.2991 | Down | 3.29E-46  | 2.97E-45  |
| Unigene23289  | Potri.013G128900.1 | 2.5198  | 6.2004   | -1.2991 | Down | 1.79E-12  | 5.82E-12  |
| Unigene88589  | Potri.006G273300.1 | 9.7689  | 24.0394  | -1.2991 | Down | 1.98E-13  | 6.74E-13  |
| Unigene53595  | Potri.015G147200.1 | 16.1066 | 39.6372  | -1.2992 | Down | 2.20E-14  | 7.81E-14  |
| Unigene13130  | Potri.010G221000.3 | 36.14   | 88.9419  | -1.2993 | Down | 2.55E-152 | 9.34E-151 |
| Unigene47302  | Potri.017G101100.2 | 52.3248 | 128.7915 | -1.2995 | Down | 4.07E-55  | 4.41E-54  |
| Unigene1502   | Potri.016G008700.1 | 12.8619 | 31.6578  | -1.2995 | Down | 3.86E-19  | 1.66E-18  |
| Unigene41484  | Potri.010G129200.1 | 19.2929 | 47.4916  | -1.2996 | Down | 6.99E-24  | 3.53E-23  |
| Unigene72204  | Potri.018G085600.2 | 10.1397 | 24.9694  | -1.3001 | Down | 4.54E-09  | 1.23E-08  |
| Unigene118973 | Potri.018G056200.3 | 1.9449  | 4.7893   | -1.3001 | Down | 3.55E-05  | 7.12E-05  |
| Unigene35348  | Potri.011G051300.1 | 1.3367  | 3.2916   | -1.3001 | Down | 3.51E-04  | 6.35E-04  |
| Unigene27960  | Potri.010G221500.3 | 3.2261  | 7.9444   | -1.3001 | Down | 9.09E-16  | 3.42E-15  |
| Unigene22361  | Potri.009G051500.1 | 10.0709 | 24.8     | -1.3001 | Down | 3.77E-27  | 2.11E-26  |
| Unigene5009   | Potri.009G012900.1 | 3.1083  | 7.6543   | -1.3001 | Down | 4.54E-09  | 1.23E-08  |
| Unigene41908  | Potri.008G084800.5 | 26.1097 | 64.2963  | -1.3001 | Down | 1.10E-51  | 1.11E-50  |

|               |                    |          |          |         |      |           |           |
|---------------|--------------------|----------|----------|---------|------|-----------|-----------|
| Unigene8845   | Potri.006G225000.1 | 1.809    | 4.4547   | -1.3001 | Down | 3.51E-04  | 6.35E-04  |
| Unigene30511  | Potri.006G195200.5 | 3.8397   | 9.4553   | -1.3001 | Down | 3.55E-05  | 7.12E-05  |
| Unigene27630  | Potri.005G191100.1 | 2.2754   | 5.6032   | -1.3001 | Down | 3.55E-05  | 7.12E-05  |
| Unigene117198 | Potri.002G203200.1 | 2.238    | 5.5111   | -1.3001 | Down | 3.51E-04  | 6.35E-04  |
| Unigene7371   | Potri.002G150800.1 | 5.3914   | 13.2765  | -1.3001 | Down | 4.20E-08  | 1.07E-07  |
| Unigene51218  | Potri.002G105700.5 | 2.5661   | 6.319    | -1.3001 | Down | 3.55E-05  | 7.12E-05  |
| Unigene34095  | Potri.001G089300.3 | 6.3271   | 15.5807  | -1.3001 | Down | 9.09E-16  | 3.42E-15  |
| Unigene114572 | Potri.018G090300.1 | 8.6392   | 21.2745  | -1.3002 | Down | 4.95E-10  | 1.42E-09  |
| Unigene6529   | Potri.014G070500.1 | 1.4668   | 3.6122   | -1.3002 | Down | 3.70E-06  | 8.14E-06  |
| Unigene57361  | Potri.013G070000.2 | 4.6624   | 11.4815  | -1.3002 | Down | 3.55E-05  | 7.12E-05  |
| Unigene47543  | Potri.011G077100.2 | 13.9873  | 34.4445  | -1.3002 | Down | 6.61E-13  | 2.19E-12  |
| Unigene61464  | Potri.010G188800.6 | 1.9855   | 4.8895   | -1.3002 | Down | 3.55E-05  | 7.12E-05  |
| Unigene53428  | Potri.010G013500.1 | 11.6474  | 28.6824  | -1.3002 | Down | 2.61E-24  | 1.33E-23  |
| Unigene101359 | Potri.009G166100.2 | 2.9558   | 7.2788   | -1.3002 | Down | 3.51E-04  | 6.35E-04  |
| Unigene60214  | Potri.009G013300.2 | 2.6373   | 6.4946   | -1.3002 | Down | 3.55E-05  | 7.12E-05  |
| Unigene104790 | Potri.008G181400.4 | 1.7037   | 4.1955   | -1.3002 | Down | 3.55E-05  | 7.12E-05  |
| Unigene6136   | Potri.008G076300.1 | 13.7419  | 33.8402  | -1.3002 | Down | 1.81E-21  | 8.48E-21  |
| Unigene29927  | Potri.007G109000.2 | 2.7556   | 6.7859   | -1.3002 | Down | 3.55E-05  | 7.12E-05  |
| Unigene116767 | Potri.006G230200.1 | 2.3664   | 5.8275   | -1.3002 | Down | 3.51E-04  | 6.35E-04  |
| Unigene15574  | Potri.006G201000.1 | 2.1184   | 5.2167   | -1.3002 | Down | 3.55E-05  | 7.12E-05  |
| Unigene63894  | Potri.006G147400.1 | 3.9086   | 9.6252   | -1.3002 | Down | 3.70E-06  | 8.14E-06  |
| Unigene41434  | Potri.006G100200.1 | 6.6268   | 16.3189  | -1.3002 | Down | 5.43E-11  | 1.64E-10  |
| Unigene82047  | Potri.005G165500.2 | 13.156   | 32.3974  | -1.3002 | Down | 7.33E-14  | 2.54E-13  |
| Unigene27423  | Potri.005G109700.1 | 42.4882  | 104.6292 | -1.3002 | Down | 3.66E-60  | 4.37E-59  |
| Unigene54063  | Potri.005G105600.1 | 2.2878   | 5.6339   | -1.3002 | Down | 4.54E-09  | 1.23E-08  |
| Unigene52377  | Potri.004G053000.3 | 21.314   | 52.4868  | -1.3002 | Down | 1.18E-35  | 8.32E-35  |
| Unigene41826  | Potri.003G186600.3 | 4.9851   | 12.2761  | -1.3002 | Down | 4.54E-09  | 1.23E-08  |
| Unigene35876  | Potri.002G143000.1 | 2.3312   | 5.7407   | -1.3002 | Down | 3.51E-04  | 6.35E-04  |
| Unigene119543 | Potri.001G336500.1 | 1.354    | 3.3343   | -1.3002 | Down | 3.91E-07  | 9.29E-07  |
| Unigene3042   | Potri.014G119600.1 | 5.0854   | 12.5261  | -1.3005 | Down | 3.87E-35  | 2.69E-34  |
| Unigene33557  | Potri.017G118000.1 | 15.104   | 37.2085  | -1.3007 | Down | 8.59E-24  | 4.32E-23  |
| Unigene32518  | Potri.013G154000.2 | 3.1422   | 7.7424   | -1.301  | Down | 3.37E-16  | 1.29E-15  |
| Unigene11899  | Potri.005G238800.2 | 5.8176   | 14.3347  | -1.301  | Down | 6.74E-30  | 4.08E-29  |
| Unigene28807  | Potri.018G051900.3 | 2.8117   | 6.9285   | -1.3011 | Down | 2.71E-14  | 9.57E-14  |
| Unigene8599   | Potri.014G189900.6 | 13.7503  | 33.885   | -1.3012 | Down | 2.44E-13  | 8.27E-13  |
| Unigene78741  | Potri.010G125400.9 | 127.1006 | 313.2082 | -1.3012 | Down | 4.99E-111 | 1.22E-109 |
| Unigene50791  | Potri.009G011900.1 | 13.4413  | 33.1256  | -1.3013 | Down | 2.83E-23  | 1.40E-22  |
| Unigene43671  | Potri.006G092800.1 | 13.9053  | 34.2699  | -1.3013 | Down | 3.68E-33  | 2.43E-32  |
| Unigene19112  | Potri.001G245500.1 | 15.147   | 37.3294  | -1.3013 | Down | 2.83E-23  | 1.40E-22  |

|               |                    |         |          |         |      |           |           |
|---------------|--------------------|---------|----------|---------|------|-----------|-----------|
| Unigene13243  | Potri.007G040700.1 | 26.2174 | 64.6169  | -1.3014 | Down | 1.80E-139 | 5.86E-138 |
| Unigene53835  | Potri.011G084400.2 | 7.5981  | 18.7283  | -1.3015 | Down | 1.82E-10  | 5.33E-10  |
| Unigene1030   | Potri.002G252800.8 | 3.5912  | 8.8519   | -1.3015 | Down | 1.76E-19  | 7.69E-19  |
| Unigene50701  | Potri.002G226200.1 | 4.201   | 10.3549  | -1.3015 | Down | 1.82E-10  | 5.33E-10  |
| Unigene32617  | Potri.011G080000.1 | 33.8214 | 83.3682  | -1.3016 | Down | 2.21E-139 | 7.19E-138 |
| Unigene70497  | Potri.005G180800.3 | 23.3122 | 57.4648  | -1.3016 | Down | 1.57E-18  | 6.61E-18  |
| Unigene45996  | Potri.003G129000.3 | 16.7714 | 41.3416  | -1.3016 | Down | 1.57E-18  | 6.61E-18  |
| Unigene85194  | Potri.002G241800.1 | 16.3023 | 40.1852  | -1.3016 | Down | 1.57E-18  | 6.61E-18  |
| Unigene53304  | Potri.015G141400.1 | 14.1522 | 34.8875  | -1.3017 | Down | 1.40E-17  | 5.68E-17  |
| Unigene51457  | Potri.T092300.1    | 10.7754 | 26.5669  | -1.3019 | Down | 1.12E-15  | 4.20E-15  |
| Unigene33862  | Potri.002G061300.4 | 12.25   | 30.2024  | -1.3019 | Down | 9.35E-23  | 4.55E-22  |
| Unigene9236   | Potri.002G042000.1 | 6.4869  | 15.9934  | -1.3019 | Down | 1.53E-08  | 4.01E-08  |
| Unigene44741  | Potri.014G166800.1 | 20.2503 | 49.9316  | -1.302  | Down | 4.75E-41  | 3.82E-40  |
| Unigene47079  | Potri.011G106600.5 | 11.3775 | 28.0538  | -1.302  | Down | 1.00E-14  | 3.62E-14  |
| Unigene34541  | Potri.004G209100.2 | 4.3123  | 10.633   | -1.302  | Down | 1.00E-14  | 3.62E-14  |
| Unigene115329 | Potri.002G068800.2 | 41.8483 | 103.1934 | -1.3021 | Down | 3.00E-45  | 2.65E-44  |
| Unigene94799  | Potri.001G260900.1 | 5.8281  | 14.3718  | -1.3021 | Down | 1.42E-07  | 3.49E-07  |
| Unigene22573  | Potri.002G192300.1 | 7.4765  | 18.4369  | -1.3022 | Down | 9.02E-14  | 3.11E-13  |
| Unigene15328  | Potri.012G088200.1 | 12.1176 | 29.8839  | -1.3023 | Down | 5.82E-19  | 2.50E-18  |
| Unigene7517   | Potri.001G059000.1 | 4.2409  | 10.4592  | -1.3023 | Down | 8.13E-13  | 2.69E-12  |
| Unigene19183  | Potri.012G089300.1 | 19.9014 | 49.0853  | -1.3024 | Down | 3.48E-23  | 1.72E-22  |
| Unigene79735  | Potri.008G168000.2 | 55.4907 | 136.8603 | -1.3024 | Down | 8.14E-51  | 8.08E-50  |
| Unigene80899  | Potri.017G049600.1 | 11.2939 | 27.8575  | -1.3025 | Down | 7.36E-12  | 2.32E-11  |
| Unigene28316  | Potri.008G203600.5 | 22.1466 | 54.6268  | -1.3025 | Down | 1.48E-32  | 9.67E-32  |
| Unigene2414   | Potri.009G019200.5 | 13.8174 | 34.0842  | -1.3026 | Down | 1.87E-26  | 1.02E-25  |
| Unigene13704  | Potri.014G020200.1 | 17.0501 | 42.0614  | -1.3027 | Down | 1.09E-58  | 1.27E-57  |
| Unigene116610 | Potri.010G255600.1 | 7.919   | 19.5362  | -1.3028 | Down | 6.68E-11  | 2.01E-10  |
| Unigene15951  | Potri.001G156100.1 | 24.1518 | 59.585   | -1.3028 | Down | 1.79E-47  | 1.66E-46  |
| Unigene32684  | Potri.001G080200.1 | 4.2681  | 10.5295  | -1.3028 | Down | 6.68E-11  | 2.01E-10  |
| Unigene25687  | Potri.013G033800.2 | 6.9849  | 17.233   | -1.3029 | Down | 3.71E-15  | 1.36E-14  |
| Unigene9234   | Potri.012G063400.1 | 32.294  | 79.6746  | -1.3029 | Down | 8.95E-29  | 5.25E-28  |
| Unigene72210  | Potri.010G164200.1 | 36.2132 | 89.3438  | -1.3029 | Down | 8.95E-29  | 5.25E-28  |
| Unigene27137  | Potri.017G029200.3 | 3.3516  | 8.27     | -1.303  | Down | 1.27E-05  | 2.67E-05  |
| Unigene36759  | Potri.014G060700.1 | 5.0056  | 12.3513  | -1.303  | Down | 1.27E-05  | 2.67E-05  |
| Unigene42783  | Potri.019G107700.1 | 2.0759  | 5.1224   | -1.3031 | Down | 1.27E-05  | 2.67E-05  |
| Unigene25968  | Potri.014G093100.1 | 1.6263  | 4.0129   | -1.3031 | Down | 1.27E-05  | 2.67E-05  |
| Unigene108922 | Potri.013G126300.3 | 5.48    | 13.522   | -1.3031 | Down | 1.27E-05  | 2.67E-05  |
| Unigene6374   | Potri.013G006400.1 | 3.019   | 7.4495   | -1.3031 | Down | 1.27E-05  | 2.67E-05  |
| Unigene10414  | Potri.007G019100.1 | 4.9256  | 12.154   | -1.3031 | Down | 1.93E-18  | 8.09E-18  |

|               |                    |         |          |         |      |          |          |
|---------------|--------------------|---------|----------|---------|------|----------|----------|
| Unigene33186  | Potri.005G137600.3 | 5.48    | 13.522   | -1.3031 | Down | 6.10E-10 | 1.74E-09 |
| Unigene13670  | Potri.004G190600.1 | 8.6138  | 21.2553  | -1.3031 | Down | 1.53E-59 | 1.80E-58 |
| Unigene86974  | Potri.019G035600.1 | 17.0202 | 42.0059  | -1.3033 | Down | 9.04E-21 | 4.13E-20 |
| Unigene82427  | Potri.001G201500.4 | 20.1503 | 49.7311  | -1.3033 | Down | 9.04E-21 | 4.13E-20 |
| Unigene6697   | Potri.015G131600.1 | 10.9509 | 27.0285  | -1.3034 | Down | 4.82E-24 | 2.45E-23 |
| Unigene23286  | Potri.010G216900.3 | 4.6049  | 11.3655  | -1.3034 | Down | 1.54E-16 | 5.98E-16 |
| Unigene116045 | Potri.008G128900.2 | 20.1125 | 49.6405  | -1.3034 | Down | 4.82E-24 | 2.45E-23 |
| Unigene48742  | Potri.005G023500.1 | 47.5508 | 117.3621 | -1.3034 | Down | 6.84E-54 | 7.23E-53 |
| Unigene40905  | Potri.001G166100.4 | 45.4475 | 112.1674 | -1.3034 | Down | 1.01E-69 | 1.42E-68 |
| Unigene28201  | Potri.006G087300.2 | 16.7162 | 41.2604  | -1.3035 | Down | 8.04E-20 | 3.56E-19 |
| Unigene25771  | Potri.018G102500.1 | 36.2712 | 89.5355  | -1.3036 | Down | 2.56E-54 | 2.72E-53 |
| Unigene52162  | Potri.011G003400.1 | 21.8984 | 54.0556  | -1.3036 | Down | 2.30E-26 | 1.25E-25 |
| Unigene49849  | Potri.011G158700.1 | 8.1673  | 20.1619  | -1.3037 | Down | 7.15E-19 | 3.05E-18 |
| Unigene34259  | Potri.008G036800.2 | 16.0234 | 39.5564  | -1.3037 | Down | 1.14E-42 | 9.49E-42 |
| Unigene22698  | Potri.001G460100.1 | 12.1194 | 29.9171  | -1.3037 | Down | 1.37E-15 | 5.14E-15 |
| Unigene21577  | Potri.002G104100.3 | 3.9088  | 9.6499   | -1.3038 | Down | 3.28E-35 | 2.28E-34 |
| Unigene106567 | Potri.014G138700.1 | 1.4187  | 3.5027   | -1.3039 | Down | 1.24E-04 | 2.35E-04 |
| Unigene39677  | Potri.014G138100.1 | 7.1831  | 17.7347  | -1.3039 | Down | 9.70E-28 | 5.51E-27 |
| Unigene17424  | Potri.013G042600.1 | 1.6217  | 4.004    | -1.3039 | Down | 1.24E-04 | 2.35E-04 |
| Unigene26107  | Potri.011G035800.1 | 4.0876  | 10.0922  | -1.3039 | Down | 1.24E-04 | 2.35E-04 |
| Unigene104796 | Potri.010G176100.3 | 1.4031  | 3.4642   | -1.3039 | Down | 1.24E-04 | 2.35E-04 |
| Unigene88207  | Potri.009G033900.1 | 5.4419  | 13.4358  | -1.3039 | Down | 5.18E-08 | 1.31E-07 |
| Unigene15861  | Potri.008G042300.5 | 2.8692  | 7.0839   | -1.3039 | Down | 1.24E-04 | 2.35E-04 |
| Unigene2948   | Potri.006G280900.1 | 2.1493  | 5.3066   | -1.3039 | Down | 5.18E-08 | 1.31E-07 |
| Unigene31498  | Potri.005G197000.3 | 3.842   | 9.4858   | -1.3039 | Down | 2.46E-11 | 7.55E-11 |
| Unigene50013  | Potri.005G135100.1 | 5.1154  | 12.6296  | -1.3039 | Down | 2.46E-11 | 7.55E-11 |
| Unigene52126  | Potri.001G407800.1 | 1.6486  | 4.0703   | -1.3039 | Down | 1.24E-04 | 2.35E-04 |
| Unigene6143   | Potri.016G116200.3 | 22.1967 | 54.8129  | -1.3042 | Down | 3.28E-41 | 2.65E-40 |
| Unigene26273  | Potri.012G004600.1 | 13.7176 | 33.8751  | -1.3042 | Down | 1.11E-13 | 3.82E-13 |
| Unigene53625  | Potri.007G124000.3 | 14.6241 | 36.1136  | -1.3042 | Down | 1.11E-13 | 3.82E-13 |
| Unigene34709  | Potri.006G147800.2 | 27.8907 | 68.876   | -1.3042 | Down | 9.13E-92 | 1.75E-90 |
| Unigene29997  | Potri.011G068600.6 | 7.4829  | 18.4802  | -1.3043 | Down | 2.24E-10 | 6.52E-10 |
| Unigene53448  | Potri.013G004600.1 | 13.9217 | 34.3838  | -1.3044 | Down | 5.09E-16 | 1.94E-15 |
| Unigene30303  | Potri.004G190400.1 | 9.9842  | 24.6591  | -1.3044 | Down | 5.09E-16 | 1.94E-15 |
| Unigene26637  | Potri.015G104200.2 | 22.3253 | 55.1447  | -1.3045 | Down | 5.92E-24 | 3.00E-23 |
| Unigene10729  | Potri.014G138400.1 | 5.2628  | 12.9989  | -1.3045 | Down | 8.35E-33 | 5.48E-32 |
| Unigene56028  | Potri.014G014300.1 | 1.7558  | 4.3369   | -1.3045 | Down | 4.83E-07 | 1.14E-06 |
| Unigene38920  | Potri.002G245300.1 | 4.8242  | 11.9161  | -1.3046 | Down | 4.83E-07 | 1.14E-06 |
| Unigene17611  | Potri.008G135600.5 | 21.2759 | 52.5573  | -1.3047 | Down | 3.54E-34 | 2.40E-33 |



|               |                    |         |          |         |      |           |           |
|---------------|--------------------|---------|----------|---------|------|-----------|-----------|
| Unigene22050  | Potri.003G070100.2 | 9.9982  | 24.6987  | -1.3047 | Down | 4.58E-42  | 3.77E-41  |
| Unigene37928  | Potri.014G164500.2 | 47.3732 | 117.0357 | -1.3048 | Down | 3.34E-96  | 6.80E-95  |
| Unigene48470  | Potri.006G043700.1 | 48.9724 | 120.9893 | -1.3048 | Down | 2.58E-51  | 2.59E-50  |
| Unigene93698  | Potri.002G113800.1 | 3.4559  | 8.5378   | -1.3048 | Down | 2.05E-09  | 5.66E-09  |
| Unigene11003  | Potri.004G020300.2 | 4.7781  | 11.8049  | -1.3049 | Down | 1.19E-27  | 6.75E-27  |
| Unigene50697  | Potri.002G160500.6 | 19.4162 | 47.9706  | -1.3049 | Down | 7.28E-38  | 5.43E-37  |
| Unigene53848  | Potri.017G148800.1 | 10.2741 | 25.3865  | -1.305  | Down | 4.10E-14  | 1.44E-13  |
| Unigene48995  | Potri.007G056400.1 | 5.1448  | 12.7123  | -1.305  | Down | 4.10E-14  | 1.44E-13  |
| Unigene77468  | Potri.003G194600.3 | 17.6002 | 43.4905  | -1.3051 | Down | 1.89E-16  | 7.33E-16  |
| Unigene98714  | Potri.003G171000.3 | 7.5919  | 18.759   | -1.3051 | Down | 1.05E-26  | 5.80E-26  |
| Unigene18448  | Potri.001G094600.1 | 4.9517  | 12.2353  | -1.3051 | Down | 4.10E-14  | 1.44E-13  |
| Unigene20121  | Potri.008G130300.1 | 17.0351 | 42.0988  | -1.3053 | Down | 2.13E-30  | 1.31E-29  |
| Unigene13757  | Potri.001G319100.1 | 20.1284 | 49.7433  | -1.3053 | Down | 4.24E-59  | 4.96E-58  |
| Unigene8774   | Potri.017G036600.2 | 24.202  | 59.8177  | -1.3054 | Down | 8.22E-25  | 4.27E-24  |
| Unigene42501  | Potri.014G080800.1 | 5.4663  | 13.5105  | -1.3054 | Down | 3.69E-13  | 1.24E-12  |
| Unigene72298  | Potri.009G157400.4 | 27.7031 | 68.4709  | -1.3054 | Down | 1.73E-22  | 8.35E-22  |
| Unigene49779  | Potri.008G039500.1 | 22.0728 | 54.5552  | -1.3054 | Down | 3.92E-27  | 2.19E-26  |
| Unigene63134  | Potri.004G022500.3 | 3.3286  | 8.2269   | -1.3054 | Down | 4.57E-06  | 9.95E-06  |
| Unigene48849  | Potri.002G105700.5 | 4.4239  | 10.9341  | -1.3054 | Down | 1.69E-15  | 6.29E-15  |
| Unigene30311  | Potri.009G082000.1 | 3.1784  | 7.8558   | -1.3055 | Down | 4.57E-06  | 9.95E-06  |
| Unigene12465  | Potri.004G208400.2 | 3.0856  | 7.6264   | -1.3055 | Down | 4.57E-06  | 9.95E-06  |
| Unigene1685   | Potri.002G049700.4 | 3.6919  | 9.125    | -1.3055 | Down | 8.23E-11  | 2.46E-10  |
| Unigene23184  | Potri.010G249200.3 | 17.129  | 42.3411  | -1.3056 | Down | 7.94E-31  | 4.94E-30  |
| Unigene90507  | Potri.002G000200.2 | 83.0498 | 205.3213 | -1.3058 | Down | 5.73E-118 | 1.51E-116 |
| Unigene3409   | Potri.008G165700.1 | 11.7313 | 29.0046  | -1.3059 | Down | 3.34E-12  | 1.07E-11  |
| Unigene4166   | Potri.007G128000.1 | 8.365   | 20.6836  | -1.306  | Down | 7.52E-10  | 2.13E-09  |
| Unigene67726  | Potri.017G055200.1 | 2.9021  | 7.1759   | -1.3061 | Down | 7.52E-10  | 2.13E-09  |
| Unigene52843  | Potri.017G037200.1 | 2.2111  | 5.4674   | -1.3061 | Down | 7.52E-10  | 2.13E-09  |
| Unigene82898  | Potri.009G011700.2 | 51.5156 | 127.3795 | -1.3061 | Down | 1.45E-51  | 1.47E-50  |
| Unigene2303   | Potri.008G200800.3 | 6.1163  | 15.1235  | -1.3061 | Down | 7.52E-10  | 2.13E-09  |
| Unigene10057  | Potri.008G048000.3 | 14.3099 | 35.3832  | -1.3061 | Down | 2.91E-18  | 1.21E-17  |
| Unigene41200  | Potri.007G014100.1 | 6.8532  | 16.9456  | -1.3061 | Down | 7.52E-10  | 2.13E-09  |
| Unigene52983  | Potri.002G024100.1 | 9.9357  | 24.5674  | -1.3061 | Down | 7.52E-10  | 2.13E-09  |
| Unigene105313 | Potri.001G069500.1 | 2.1485  | 5.3125   | -1.3061 | Down | 7.52E-10  | 2.13E-09  |
| Unigene3367   | Potri.017G076000.3 | 17.7215 | 43.8219  | -1.3062 | Down | 6.26E-16  | 2.37E-15  |
| Unigene31373  | Potri.010G174000.1 | 13.7419 | 33.9812  | -1.3062 | Down | 6.26E-16  | 2.37E-15  |
| Unigene68222  | Potri.012G119600.1 | 5.1772  | 12.8035  | -1.3063 | Down | 1.76E-07  | 4.27E-07  |
| Unigene44002  | Potri.008G133900.8 | 3.028   | 7.4884   | -1.3063 | Down | 1.76E-07  | 4.27E-07  |
| Unigene43920  | Potri.005G076500.2 | 6.9837  | 17.2711  | -1.3063 | Down | 1.21E-19  | 5.33E-19  |

|               |                     |          |          |         |      |           |           |
|---------------|---------------------|----------|----------|---------|------|-----------|-----------|
| Unigene61663  | Potri.002G196000.3  | 8.1247   | 20.0926  | -1.3063 | Down | 1.76E-07  | 4.27E-07  |
| Unigene6460   | Potri.014G157100.2  | 16.2835  | 40.2716  | -1.3064 | Down | 2.30E-29  | 1.37E-28  |
| Unigene107173 | Potri.017G141400.3  | 1.326    | 3.2804   | -1.3068 | Down | 6.90E-09  | 1.84E-08  |
| Unigene48977  | Potri.010G091200.1  | 2.6856   | 6.644    | -1.3068 | Down | 4.40E-05  | 8.76E-05  |
| Unigene45972  | Potri.008G048000.3  | 12.4332  | 30.759   | -1.3068 | Down | 1.23E-12  | 4.03E-12  |
| Unigene83833  | Potri.008G021900.1  | 14.7559  | 36.5052  | -1.3068 | Down | 2.32E-16  | 8.96E-16  |
| Unigene50418  | Potri.005G094300.1  | 22.759   | 56.3047  | -1.3068 | Down | 6.56E-46  | 5.88E-45  |
| Unigene4768   | Potri.004G125000.10 | 41.962   | 103.8118 | -1.3068 | Down | 1.53E-38  | 1.16E-37  |
| Unigene47238  | Potri.001G438300.1  | 16.3754  | 40.5119  | -1.3068 | Down | 2.32E-16  | 8.96E-16  |
| Unigene4853   | Potri.001G296100.2  | 1.6646   | 4.1182   | -1.3068 | Down | 4.40E-05  | 8.76E-05  |
| Unigene833    | Potri.010G192600.5  | 7.0606   | 17.4695  | -1.307  | Down | 1.89E-21  | 8.80E-21  |
| Unigene17344  | Potri.003G130400.1  | 10.9952  | 27.2058  | -1.307  | Down | 3.21E-30  | 1.96E-29  |
| Unigene6729   | Potri.014G161800.2  | 23.5879  | 58.3667  | -1.3071 | Down | 2.78E-35  | 1.94E-34  |
| Unigene66500  | Potri.002G085000.5  | 12.4789  | 30.8776  | -1.3071 | Down | 5.04E-14  | 1.76E-13  |
| Unigene14797  | Potri.014G075000.5  | 17.0512  | 42.1945  | -1.3072 | Down | 4.01E-19  | 1.73E-18  |
| Unigene47899  | Potri.006G133000.2  | 7.212    | 17.8466  | -1.3072 | Down | 2.76E-10  | 8.00E-10  |
| Unigene8875   | Potri.005G140500.3  | 9.8643   | 24.41    | -1.3072 | Down | 2.76E-10  | 8.00E-10  |
| Unigene13073  | Potri.018G002000.1  | 9.1806   | 22.7207  | -1.3073 | Down | 1.40E-25  | 7.46E-25  |
| Unigene11018  | Potri.001G214800.1  | 3.3842   | 8.3752   | -1.3073 | Down | 1.68E-20  | 7.58E-20  |
| Unigene80270  | Potri.014G128500.1  | 11.1748  | 27.6578  | -1.3074 | Down | 1.11E-11  | 3.48E-11  |
| Unigene10506  | Potri.006G056300.1  | 4.2204   | 10.4457  | -1.3075 | Down | 1.65E-06  | 3.74E-06  |
| Unigene82757  | Potri.003G109700.1  | 105.9646 | 262.2694 | -1.3075 | Down | 4.98E-104 | 1.12E-102 |
| Unigene45386  | Potri.002G021500.1  | 62.8876  | 155.6514 | -1.3075 | Down | 6.51E-89  | 1.20E-87  |
| Unigene7599   | Potri.018G108600.1  | 6.1512   | 15.2281  | -1.3078 | Down | 1.86E-14  | 6.64E-14  |
| Unigene36202  | Potri.013G001500.1  | 7.3659   | 18.2353  | -1.3078 | Down | 6.39E-08  | 1.61E-07  |
| Unigene27774  | Potri.004G152800.4  | 4.5299   | 11.2145  | -1.3078 | Down | 6.39E-08  | 1.61E-07  |
| Unigene87211  | Potri.014G096500.2  | 89.0646  | 220.5034 | -1.3079 | Down | 1.99E-103 | 4.43E-102 |
| Unigene11513  | Potri.011G019000.1  | 4.4435   | 11.0014  | -1.3079 | Down | 7.69E-16  | 2.91E-15  |
| Unigene7511   | Potri.007G007700.1  | 14.4267  | 35.7202  | -1.308  | Down | 2.62E-39  | 2.02E-38  |
| Unigene34451  | Potri.012G071700.1  | 23.2629  | 57.6016  | -1.3081 | Down | 4.75E-42  | 3.91E-41  |
| Unigene27041  | Potri.011G028400.1  | 38.1757  | 94.5296  | -1.3081 | Down | 2.03E-43  | 1.72E-42  |
| Unigene53937  | Potri.006G031000.1  | 24.9122  | 61.6865  | -1.3081 | Down | 1.94E-26  | 1.06E-25  |
| Unigene20989  | Potri.018G023700.1  | 10.0364  | 24.8535  | -1.3082 | Down | 1.01E-10  | 3.01E-10  |
| Unigene70161  | Potri.017G130300.1  | 2.7193   | 6.734    | -1.3082 | Down | 1.01E-10  | 3.01E-10  |
| Unigene19061  | Potri.014G130600.1  | 5.4565   | 13.5121  | -1.3082 | Down | 1.01E-10  | 3.01E-10  |
| Unigene31859  | Potri.012G106500.1  | 6.9133   | 17.1191  | -1.3082 | Down | 3.03E-72  | 4.40E-71  |
| Unigene91091  | Potri.008G018600.1  | 29.2871  | 72.5318  | -1.3083 | Down | 3.23E-45  | 2.85E-44  |
| Unigene36073  | Potri.017G082200.1  | 103.7901 | 257.0543 | -1.3084 | Down | 1.42E-141 | 4.71E-140 |
| Unigene24707  | Potri.008G009400.1  | 18.0783  | 44.7746  | -1.3084 | Down | 1.72E-25  | 9.12E-25  |

|               |                    |         |         |         |      |          |          |
|---------------|--------------------|---------|---------|---------|------|----------|----------|
| Unigene8756   | Potri.005G156600.3 | 27.8945 | 69.0863 | -1.3084 | Down | 2.02E-37 | 1.49E-36 |
| Unigene11562  | Potri.006G073100.1 | 9.4838  | 23.4896 | -1.3085 | Down | 8.42E-55 | 9.06E-54 |
| Unigene1076   | Potri.006G102000.3 | 18.2215 | 45.1349 | -1.3086 | Down | 9.84E-34 | 6.61E-33 |
| Unigene588    | Potri.004G198400.1 | 12.6671 | 31.377  | -1.3086 | Down | 4.03E-51 | 4.02E-50 |
| Unigene51222  | Potri.001G006400.1 | 13.8982 | 34.4262 | -1.3086 | Down | 1.18E-17 | 4.82E-17 |
| Unigene26903  | Potri.009G084500.1 | 18.7488 | 46.4441 | -1.3087 | Down | 1.37E-40 | 1.09E-39 |
| Unigene2733   | Potri.003G119300.1 | 34.3308 | 85.045  | -1.3087 | Down | 1.95E-63 | 2.46E-62 |
| Unigene114321 | Potri.015G135500.1 | 23.3297 | 57.7945 | -1.3088 | Down | 1.52E-24 | 7.84E-24 |
| Unigene32332  | Potri.014G027200.1 | 6.9649  | 17.2549 | -1.3088 | Down | 1.14E-28 | 6.67E-28 |
| Unigene22196  | Potri.009G134200.2 | 8.2175  | 20.3602 | -1.309  | Down | 4.42E-56 | 4.88E-55 |
| Unigene36163  | Potri.005G236200.1 | 35.754  | 88.5851 | -1.309  | Down | 3.09E-49 | 2.97E-48 |
| Unigene33543  | Potri.016G116600.3 | 16.6219 | 41.188  | -1.3091 | Down | 5.83E-36 | 4.15E-35 |
| Unigene117788 | Potri.016G000900.1 | 1.9427  | 4.8139  | -1.3091 | Down | 4.37E-04 | 7.78E-04 |
| Unigene94624  | Potri.014G197600.2 | 17.5115 | 43.3925 | -1.3091 | Down | 2.55E-15 | 9.43E-15 |
| Unigene7574   | Potri.014G089200.1 | 7.6035  | 18.8411 | -1.3091 | Down | 2.39E-26 | 1.30E-25 |
| Unigene16213  | Potri.013G011600.3 | 5.354   | 13.2669 | -1.3091 | Down | 1.57E-05 | 3.27E-05 |
| Unigene41742  | Potri.011G088400.5 | 2.4379  | 6.0409  | -1.3091 | Down | 4.37E-04 | 7.78E-04 |
| Unigene38056  | Potri.011G022600.1 | 9.0975  | 22.5429 | -1.3091 | Down | 6.20E-14 | 2.16E-13 |
| Unigene113020 | Potri.010G221000.5 | 7.4899  | 18.5594 | -1.3091 | Down | 2.33E-08 | 6.02E-08 |
| Unigene29824  | Potri.010G197600.2 | 20.722  | 51.3478 | -1.3091 | Down | 1.35E-23 | 6.73E-23 |
| Unigene36151  | Potri.010G191100.1 | 7.6468  | 18.9484 | -1.3091 | Down | 6.20E-14 | 2.16E-13 |
| Unigene44116  | Potri.010G089700.1 | 13.8938 | 34.428  | -1.3091 | Down | 1.83E-19 | 7.98E-19 |
| Unigene95917  | Potri.009G085400.2 | 5.4772  | 13.5721 | -1.3091 | Down | 2.55E-15 | 9.43E-15 |
| Unigene14494  | Potri.009G018800.1 | 3.0325  | 7.5143  | -1.3091 | Down | 1.57E-05 | 3.27E-05 |
| Unigene44069  | Potri.008G196600.3 | 7.5353  | 18.6719 | -1.3091 | Down | 1.51E-12 | 4.94E-12 |
| Unigene39373  | Potri.008G123200.3 | 4.2524  | 10.5372 | -1.3091 | Down | 3.73E-11 | 1.13E-10 |
| Unigene48230  | Potri.008G093100.5 | 12.6977 | 31.4642 | -1.3091 | Down | 1.51E-12 | 4.94E-12 |
| Unigene40970  | Potri.007G124000.3 | 3.1213  | 7.7344  | -1.3091 | Down | 4.37E-04 | 7.78E-04 |
| Unigene117227 | Potri.006G246300.1 | 3.188   | 7.8997  | -1.3091 | Down | 1.57E-05 | 3.27E-05 |
| Unigene42029  | Potri.005G141900.1 | 2.2202  | 5.5015  | -1.3091 | Down | 4.37E-04 | 7.78E-04 |
| Unigene6330   | Potri.003G089300.3 | 5.1805  | 12.8369 | -1.3091 | Down | 1.57E-05 | 3.27E-05 |
| Unigene77428  | Potri.002G261000.3 | 6.4588  | 16.0045 | -1.3091 | Down | 5.97E-07 | 1.40E-06 |
| Unigene31020  | Potri.002G038300.1 | 1.5574  | 3.8591  | -1.3091 | Down | 4.37E-04 | 7.78E-04 |
| Unigene37705  | Potri.001G379100.1 | 6.3399  | 15.7098 | -1.3091 | Down | 9.26E-10 | 2.60E-09 |
| Unigene25350  | Potri.001G214700.1 | 4.1444  | 10.2696 | -1.3091 | Down | 5.97E-07 | 1.40E-06 |
| Unigene69953  | Potri.018G064700.1 | 2.9408  | 7.2872  | -1.3092 | Down | 9.26E-10 | 2.60E-09 |
| Unigene17379  | Potri.012G067100.1 | 2.5635  | 6.3523  | -1.3092 | Down | 5.97E-07 | 1.40E-06 |
| Unigene63043  | Potri.007G034900.1 | 3.5523  | 8.8025  | -1.3092 | Down | 1.57E-05 | 3.27E-05 |
| Unigene22042  | Potri.002G054400.1 | 26.7134 | 66.2031 | -1.3093 | Down | 5.55E-46 | 4.98E-45 |

|               |                     |          |          |         |      |           |           |
|---------------|---------------------|----------|----------|---------|------|-----------|-----------|
| Unigene39794  | Potri.019G081100.2  | 7.3923   | 18.3228  | -1.3095 | Down | 1.19E-22  | 5.78E-22  |
| Unigene7824   | Potri.013G079600.2  | 5.5096   | 13.6561  | -1.3095 | Down | 2.08E-46  | 1.88E-45  |
| Unigene39055  | Potri.002G253200.1  | 15.0491  | 37.3006  | -1.3095 | Down | 5.01E-24  | 2.54E-23  |
| Unigene30219  | Potri.001G362300.3  | 48.0526  | 119.1075 | -1.3096 | Down | 6.27E-41  | 5.03E-40  |
| Unigene53187  | Potri.001G206600.1  | 21.7708  | 53.963   | -1.3096 | Down | 2.84E-21  | 1.32E-20  |
| Unigene35120  | Potri.016G018800.1  | 4.6065   | 11.4195  | -1.3098 | Down | 9.46E-16  | 3.56E-15  |
| Unigene7106   | Potri.012G134900.4  | 9.5037   | 23.5606  | -1.3098 | Down | 2.29E-14  | 8.12E-14  |
| Unigene46116  | Potri.009G160400.1  | 8.5758   | 21.2614  | -1.3099 | Down | 5.59E-13  | 1.86E-12  |
| Unigene104593 | Potri.001G143400.12 | 10.7123  | 26.5584  | -1.3099 | Down | 5.59E-13  | 1.86E-12  |
| Unigene8717   | Potri.013G006300.1  | 15.409   | 38.2089  | -1.3101 | Down | 6.05E-19  | 2.59E-18  |
| Unigene77541  | Potri.010G027800.1  | 37.2995  | 92.4953  | -1.3102 | Down | 1.48E-33  | 9.90E-33  |
| Unigene8216   | Potri.014G006900.1  | 109.7083 | 272.0656 | -1.3103 | Down | 6.28E-235 | 3.95E-233 |
| Unigene47219  | Potri.001G325500.1  | 9.7865   | 24.2703  | -1.3103 | Down | 8.51E-09  | 2.26E-08  |
| Unigene36792  | Potri.002G231100.1  | 19.4079  | 48.1351  | -1.3104 | Down | 4.61E-28  | 2.64E-27  |
| Unigene8243   | Potri.001G157800.1  | 5.7836   | 14.3447  | -1.3105 | Down | 4.45E-53  | 4.62E-52  |
| Unigene64604  | Potri.017G109500.1  | 2.651    | 6.5758   | -1.3106 | Down | 2.17E-07  | 5.24E-07  |
| Unigene44047  | Potri.010G225300.3  | 5.1079   | 12.6699  | -1.3106 | Down | 2.06E-13  | 7.01E-13  |
| Unigene80446  | Potri.009G017400.4  | 19.4018  | 48.125   | -1.3106 | Down | 2.25E-19  | 9.78E-19  |
| Unigene35337  | Potri.007G135700.1  | 3.5801   | 8.8802   | -1.3106 | Down | 2.17E-07  | 5.24E-07  |
| Unigene35527  | Potri.007G001500.4  | 5.0596   | 12.55    | -1.3106 | Down | 2.17E-07  | 5.24E-07  |
| Unigene108410 | Potri.006G235200.1  | 23.2446  | 57.657   | -1.3106 | Down | 2.25E-19  | 9.78E-19  |
| Unigene66942  | Potri.006G057400.2  | 3.6205   | 8.9804   | -1.3106 | Down | 2.17E-07  | 5.24E-07  |
| Unigene43573  | Potri.005G164100.5  | 10.5977  | 26.289   | -1.3107 | Down | 2.52E-40  | 1.99E-39  |
| Unigene42855  | Potri.010G153300.2  | 3.5205   | 8.7334   | -1.3108 | Down | 1.72E-28  | 9.98E-28  |
| Unigene13516  | Potri.005G094200.1  | 4.6258   | 11.4765  | -1.3109 | Down | 3.49E-21  | 1.62E-20  |
| Unigene83236  | Potri.003G166400.3  | 24.356   | 60.4278  | -1.3109 | Down | 9.64E-26  | 5.16E-25  |
| Unigene31011  | Potri.004G172100.1  | 3.8108   | 9.4553   | -1.311  | Down | 1.25E-10  | 3.69E-10  |
| Unigene34221  | Potri.002G022300.1  | 23.8383  | 59.1442  | -1.311  | Down | 5.95E-92  | 1.14E-90  |
| Unigene6171   | Potri.008G179500.1  | 2.8102   | 6.9728   | -1.3111 | Down | 1.25E-10  | 3.69E-10  |
| Unigene102164 | Potri.006G241400.1  | 2.2339   | 5.5428   | -1.3111 | Down | 5.66E-06  | 1.22E-05  |
| Unigene5771   | Potri.017G098500.2  | 9.9941   | 24.8033  | -1.3114 | Down | 3.11E-09  | 8.49E-09  |
| Unigene55505  | Potri.013G117400.2  | 6.0369   | 14.9823  | -1.3114 | Down | 3.11E-09  | 8.49E-09  |
| Unigene29712  | Potri.008G124700.1  | 10.0907  | 25.043   | -1.3114 | Down | 3.11E-09  | 8.49E-09  |
| Unigene75802  | Potri.007G147300.1  | 9.3667   | 23.2462  | -1.3114 | Down | 3.11E-09  | 8.49E-09  |
| Unigene73989  | Potri.003G169200.2  | 13.8341  | 34.3367  | -1.3115 | Down | 1.86E-12  | 6.05E-12  |
| Unigene19029  | Potri.018G070200.2  | 8.1369   | 20.1978  | -1.3116 | Down | 7.43E-19  | 3.17E-18  |
| Unigene86703  | Potri.006G006100.4  | 24.9479  | 61.9247  | -1.3116 | Down | 8.91E-30  | 5.38E-29  |
| Unigene50549  | Potri.001G286000.4  | 5.7558   | 14.2867  | -1.3116 | Down | 1.16E-15  | 4.35E-15  |
| Unigene726    | Potri.015G091500.1  | 6.1584   | 15.2875  | -1.3117 | Down | 2.11E-28  | 1.22E-27  |

|              |                    |         |          |         |      |          |          |
|--------------|--------------------|---------|----------|---------|------|----------|----------|
| Unigene20028 | Potri.003G043300.3 | 5.7966  | 14.3906  | -1.3118 | Down | 7.88E-08 | 1.97E-07 |
| Unigene3349  | Potri.013G061500.1 | 4.1047  | 10.1905  | -1.3119 | Down | 1.54E-04 | 2.89E-04 |
| Unigene31757 | Potri.011G056000.2 | 2.4166  | 5.9995   | -1.3119 | Down | 1.54E-04 | 2.89E-04 |
| Unigene30097 | Potri.010G176300.2 | 8.4383  | 20.949   | -1.3119 | Down | 4.59E-11 | 1.39E-10 |
| Unigene23819 | Potri.010G166500.4 | 8.8704  | 22.0217  | -1.3119 | Down | 7.55E-24 | 3.81E-23 |
| Unigene3073  | Potri.006G035300.3 | 1.3489  | 3.3488   | -1.3119 | Down | 1.54E-04 | 2.89E-04 |
| Unigene52125 | Potri.003G149300.1 | 5.3396  | 13.2561  | -1.3119 | Down | 4.59E-11 | 1.39E-10 |
| Unigene5302  | Potri.T091100.1    | 31.1173 | 77.2622  | -1.312  | Down | 2.58E-43 | 2.18E-42 |
| Unigene52608 | Potri.010G089700.1 | 46.9353 | 116.5371 | -1.312  | Down | 7.44E-85 | 1.31E-83 |
| Unigene7556  | Potri.018G017300.3 | 7.8655  | 19.5299  | -1.3121 | Down | 2.76E-19 | 1.20E-18 |
| Unigene43289 | Potri.011G141300.1 | 13.6215 | 33.8221  | -1.3121 | Down | 5.61E-37 | 4.09E-36 |
| Unigene13102 | Potri.011G135500.1 | 9.5678  | 23.7568  | -1.3121 | Down | 2.76E-19 | 1.20E-18 |
| Unigene14352 | Potri.002G016800.1 | 11.6561 | 28.9429  | -1.3121 | Down | 4.30E-16 | 1.64E-15 |
| Unigene25756 | Potri.008G078600.1 | 10.9113 | 27.0958  | -1.3122 | Down | 4.29E-21 | 1.98E-20 |
| Unigene42778 | Potri.017G042900.1 | 23.1924 | 57.5972  | -1.3123 | Down | 1.06E-71 | 1.53E-70 |
| Unigene29597 | Potri.006G257900.2 | 4.7945  | 11.9067  | -1.3123 | Down | 1.14E-09 | 3.19E-09 |
| Unigene20336 | Potri.012G137700.1 | 9.9535  | 24.7207  | -1.3124 | Down | 1.04E-14 | 3.75E-14 |
| Unigene24117 | Potri.006G275200.1 | 21.5914 | 53.6225  | -1.3124 | Down | 2.68E-52 | 2.75E-51 |
| Unigene52774 | Potri.001G018200.1 | 30.6749 | 76.1812  | -1.3124 | Down | 4.63E-31 | 2.89E-30 |
| Unigene416   | Potri.002G100700.1 | 3.7385  | 9.2853   | -1.3125 | Down | 1.02E-19 | 4.51E-19 |
| Unigene26931 | Potri.010G108600.1 | 5.9679  | 14.8239  | -1.3126 | Down | 2.04E-06 | 4.59E-06 |
| Unigene20746 | Potri.004G141700.4 | 2.9973  | 7.445    | -1.3126 | Down | 2.04E-06 | 4.59E-06 |
| Unigene37571 | Potri.001G050000.2 | 19.3268 | 48.01    | -1.3127 | Down | 2.49E-23 | 1.24E-22 |
| Unigene42005 | Potri.015G072900.1 | 11.8301 | 29.3892  | -1.3128 | Down | 2.54E-13 | 8.59E-13 |
| Unigene43844 | Potri.002G259600.3 | 7.5487  | 18.7531  | -1.3128 | Down | 3.90E-25 | 2.05E-24 |
| Unigene44    | Potri.003G031000.2 | 8.8918  | 22.0903  | -1.3129 | Down | 2.53E-87 | 4.58E-86 |
| Unigene71100 | Potri.001G321600.1 | 49.4865 | 122.9429 | -1.3129 | Down | 1.09E-38 | 8.31E-38 |
| Unigene7712  | Potri.001G178100.4 | 15.2049 | 37.7792  | -1.3131 | Down | 7.05E-46 | 6.31E-45 |
| Unigene32919 | Potri.005G252300.1 | 4.7879  | 11.8975  | -1.3132 | Down | 2.28E-27 | 1.28E-26 |
| Unigene22380 | Potri.015G090300.2 | 5.7979  | 14.4084  | -1.3133 | Down | 2.21E-22 | 1.06E-21 |
| Unigene31773 | Potri.009G119500.1 | 23.2253 | 57.7194  | -1.3134 | Down | 4.42E-57 | 4.99E-56 |
| Unigene32169 | Potri.018G037000.1 | 11.9911 | 29.8035  | -1.3135 | Down | 6.84E-63 | 8.55E-62 |
| Unigene51255 | Potri.008G149700.1 | 17.6384 | 43.8463  | -1.3137 | Down | 7.91E-32 | 5.05E-31 |
| Unigene54237 | Potri.001G067800.1 | 56.6887 | 140.9138 | -1.3137 | Down | 2.21E-49 | 2.13E-48 |
| Unigene11295 | Potri.017G016800.3 | 1.6471  | 4.095    | -1.3139 | Down | 1.54E-10 | 4.51E-10 |
| Unigene19868 | Potri.012G055000.1 | 2.8749  | 7.1476   | -1.3139 | Down | 7.37E-07 | 1.71E-06 |
| Unigene16041 | Potri.003G015300.1 | 4.1622  | 10.3481  | -1.3139 | Down | 5.46E-05 | 1.08E-04 |
| Unigene57433 | Potri.014G088500.1 | 3.0458  | 7.5726   | -1.314  | Down | 1.54E-10 | 4.51E-10 |
| Unigene29084 | Potri.010G137800.1 | 5.2139  | 12.963   | -1.314  | Down | 1.96E-21 | 9.13E-21 |

|               |                    |         |          |         |      |          |          |
|---------------|--------------------|---------|----------|---------|------|----------|----------|
| Unigene65297  | Potri.008G197200.1 | 1.5369  | 3.8211   | -1.314  | Down | 5.46E-05 | 1.08E-04 |
| Unigene7235   | Potri.006G153700.1 | 25.6898 | 63.8705  | -1.314  | Down | 1.87E-30 | 1.15E-29 |
| Unigene3703   | Potri.005G010500.1 | 1.4966  | 3.7209   | -1.314  | Down | 5.46E-05 | 1.08E-04 |
| Unigene23769  | Potri.004G167600.1 | 3.908   | 9.7162   | -1.314  | Down | 4.78E-25 | 2.51E-24 |
| Unigene17786  | Potri.004G132900.1 | 7.6161  | 18.9354  | -1.314  | Down | 2.29E-12 | 7.40E-12 |
| Unigene94648  | Potri.001G107300.1 | 1.619   | 4.0252   | -1.314  | Down | 5.46E-05 | 1.08E-04 |
| Unigene40545  | Potri.002G231100.1 | 30.7786 | 76.5299  | -1.3141 | Down | 1.16E-50 | 1.14E-49 |
| Unigene37427  | Potri.018G006200.1 | 32.321  | 80.3704  | -1.3142 | Down | 2.85E-58 | 3.28E-57 |
| Unigene45689  | Potri.014G031000.1 | 16.2893 | 40.506   | -1.3142 | Down | 1.11E-54 | 1.19E-53 |
| Unigene89755  | Potri.001G100300.1 | 42.0262 | 104.5037 | -1.3142 | Down | 2.85E-58 | 3.28E-57 |
| Unigene45197  | Potri.015G091500.1 | 7.3061  | 18.1692  | -1.3143 | Down | 4.68E-20 | 2.08E-19 |
| Unigene32734  | Potri.011G150500.1 | 5.7841  | 14.3851  | -1.3144 | Down | 2.60E-31 | 1.64E-30 |
| Unigene2563   | Potri.006G126300.3 | 32.2011 | 80.0813  | -1.3144 | Down | 1.16E-84 | 2.02E-83 |
| Unigene62395  | Potri.005G245100.1 | 13.348  | 33.1965  | -1.3144 | Down | 1.96E-16 | 7.60E-16 |
| Unigene49733  | Potri.005G214400.1 | 17.129  | 42.5998  | -1.3144 | Down | 2.60E-31 | 1.64E-30 |
| Unigene86423  | Potri.003G194600.7 | 34.9451 | 86.9122  | -1.3145 | Down | 9.77E-41 | 7.79E-40 |
| Unigene83932  | Potri.019G100000.1 | 20.2833 | 50.4515  | -1.3146 | Down | 2.71E-22 | 1.30E-21 |
| Unigene86231  | Potri.019G036700.7 | 33.9314 | 84.4024  | -1.3147 | Down | 2.29E-39 | 1.77E-38 |
| Unigene14799  | Potri.017G007400.1 | 39.345  | 97.8704  | -1.3147 | Down | 5.54E-47 | 5.08E-46 |
| Unigene2068   | Potri.006G281200.1 | 21.1953 | 52.7221  | -1.3147 | Down | 6.14E-30 | 3.72E-29 |
| Unigene74953  | Potri.011G131400.1 | 49.2765 | 122.5833 | -1.3148 | Down | 1.37E-41 | 1.11E-40 |
| Unigene30440  | Potri.009G021900.1 | 8.767   | 21.8099  | -1.3148 | Down | 3.84E-09 | 1.04E-08 |
| Unigene40047  | Potri.007G082800.1 | 2.9992  | 7.4613   | -1.3148 | Down | 3.84E-09 | 1.04E-08 |
| Unigene5640   | Potri.005G213300.4 | 27.2439 | 67.7732  | -1.3148 | Down | 5.73E-34 | 3.87E-33 |
| Unigene77022  | Potri.003G019500.3 | 28.9927 | 72.1228  | -1.3148 | Down | 2.47E-26 | 1.35E-25 |
| Unigene32691  | Potri.018G149800.1 | 19.676  | 48.9543  | -1.315  | Down | 3.20E-40 | 2.53E-39 |
| Unigene7861   | Potri.001G374000.1 | 27.1558 | 67.5635  | -1.315  | Down | 7.09E-73 | 1.04E-71 |
| Unigene37301  | Potri.007G124000.3 | 14.1133 | 35.1168  | -1.3151 | Down | 3.12E-13 | 1.05E-12 |
| Unigene6897   | Potri.017G008300.1 | 7.1197  | 17.7168  | -1.3152 | Down | 2.69E-17 | 1.08E-16 |
| Unigene108029 | Potri.012G038300.1 | 20.661  | 51.4134  | -1.3152 | Down | 2.69E-17 | 1.08E-16 |
| Unigene24160  | Potri.009G131300.1 | 12.0123 | 29.8907  | -1.3152 | Down | 3.65E-99 | 7.76E-98 |
| Unigene44060  | Potri.008G141700.1 | 9.9407  | 24.7366  | -1.3152 | Down | 2.69E-17 | 1.08E-16 |
| Unigene47674  | Potri.014G082100.1 | 29.4554 | 73.2992  | -1.3153 | Down | 3.43E-27 | 1.92E-26 |
| Unigene38395  | Potri.005G107800.1 | 11.5645 | 28.7789  | -1.3153 | Down | 2.40E-21 | 1.12E-20 |
| Unigene90267  | Potri.003G151700.1 | 14.0492 | 34.9622  | -1.3153 | Down | 2.40E-21 | 1.12E-20 |
| Unigene7820   | Potri.007G099800.1 | 6.2322  | 15.5101  | -1.3154 | Down | 2.02E-29 | 1.20E-28 |
| Unigene18841  | Potri.007G063600.1 | 24.3422 | 60.5828  | -1.3154 | Down | 2.33E-55 | 2.54E-54 |
| Unigene42699  | Potri.005G204400.1 | 5.2992  | 13.1885  | -1.3154 | Down | 1.54E-19 | 6.77E-19 |
| Unigene25754  | Potri.018G139300.1 | 18.0958 | 45.0393  | -1.3155 | Down | 1.11E-35 | 7.87E-35 |

|               |                    |          |          |         |      |           |           |
|---------------|--------------------|----------|----------|---------|------|-----------|-----------|
| Unigene29464  | Potri.014G075000.5 | 12.1262  | 30.1802  | -1.3155 | Down | 1.39E-23  | 6.97E-23  |
| Unigene34514  | Potri.002G262700.1 | 28.6548  | 71.3173  | -1.3155 | Down | 2.09E-67  | 2.82E-66  |
| Unigene4920   | Potri.019G077600.1 | 6.094    | 15.1685  | -1.3156 | Down | 1.40E-09  | 3.91E-09  |
| Unigene101867 | Potri.015G120000.1 | 1.7475   | 4.3496   | -1.3156 | Down | 1.95E-05  | 4.01E-05  |
| Unigene39064  | Potri.015G001900.1 | 3.3909   | 8.4402   | -1.3156 | Down | 1.95E-05  | 4.01E-05  |
| Unigene10742  | Potri.013G160000.1 | 7.4564   | 18.5588  | -1.3156 | Down | 8.40E-60  | 9.95E-59  |
| Unigene45262  | Potri.007G014100.1 | 4.0174   | 9.9997   | -1.3156 | Down | 9.99E-18  | 4.08E-17  |
| Unigene17915  | Potri.001G173500.1 | 2.4924   | 6.2037   | -1.3156 | Down | 1.95E-05  | 4.01E-05  |
| Unigene14783  | Potri.006G164000.1 | 5.2071   | 12.962   | -1.3157 | Down | 4.77E-28  | 2.74E-27  |
| Unigene4607   | Potri.008G205400.1 | 8.781    | 21.8611  | -1.3159 | Down | 1.66E-32  | 1.08E-31  |
| Unigene92557  | Potri.007G053600.1 | 101.0004 | 251.4469 | -1.3159 | Down | 6.53E-184 | 3.07E-182 |
| Unigene12520  | Potri.001G012200.2 | 17.396   | 43.3088  | -1.3159 | Down | 1.66E-32  | 1.08E-31  |
| Unigene16112  | Potri.007G015300.1 | 17.7546  | 44.2037  | -1.316  | Down | 3.71E-18  | 1.54E-17  |
| Unigene21937  | Potri.002G253200.1 | 16.2102  | 40.3581  | -1.316  | Down | 9.29E-72  | 1.34E-70  |
| Unigene109483 | Potri.002G231100.1 | 20.6449  | 51.3997  | -1.316  | Down | 3.71E-18  | 1.54E-17  |
| Unigene12057  | Potri.010G180600.1 | 8.4275   | 20.9837  | -1.3161 | Down | 3.45E-39  | 2.65E-38  |
| Unigene43823  | Potri.007G085700.2 | 15.9425  | 39.6991  | -1.3162 | Down | 3.91E-31  | 2.45E-30  |
| Unigene33180  | Potri.002G241800.2 | 35.3174  | 87.9415  | -1.3162 | Down | 2.78E-83  | 4.77E-82  |
| Unigene11495  | Potri.016G005400.2 | 7.0224   | 17.488   | -1.3163 | Down | 5.15E-10  | 1.47E-09  |
| Unigene82901  | Potri.009G159200.2 | 88.1114  | 219.4264 | -1.3163 | Down | 1.43E-88  | 2.63E-87  |
| Unigene47633  | Potri.002G034500.1 | 33.3618  | 83.0809  | -1.3163 | Down | 4.57E-44  | 3.93E-43  |
| Unigene80302  | Potri.001G398600.2 | 36.8465  | 91.7589  | -1.3163 | Down | 1.37E-35  | 9.62E-35  |
| Unigene1433   | Potri.019G032800.6 | 8.1593   | 20.3209  | -1.3164 | Down | 2.82E-12  | 9.07E-12  |
| Unigene23972  | Potri.014G122500.1 | 8.7602   | 21.8172  | -1.3164 | Down | 1.22E-63  | 1.54E-62  |
| Unigene51003  | Potri.014G169600.2 | 8.7377   | 21.7628  | -1.3165 | Down | 1.57E-14  | 5.62E-14  |
| Unigene73551  | Potri.010G136800.3 | 13.6117  | 33.9003  | -1.3165 | Down | 2.82E-12  | 9.07E-12  |
| Unigene22350  | Potri.017G110000.2 | 33.2383  | 82.7884  | -1.3166 | Down | 3.92E-131 | 1.18E-129 |
| Unigene17534  | Potri.005G138600.7 | 11.2935  | 28.1296  | -1.3166 | Down | 8.92E-17  | 3.51E-16  |
| Unigene32039  | Potri.001G399000.1 | 26.9246  | 67.0654  | -1.3166 | Down | 6.71E-121 | 1.83E-119 |
| Unigene84609  | Potri.009G024600.4 | 46.0916  | 114.8149 | -1.3167 | Down | 8.54E-50  | 8.30E-49  |
| Unigene21309  | Potri.004G147900.1 | 13.2732  | 33.0621  | -1.3167 | Down | 1.35E-75  | 2.07E-74  |
| Unigene15416  | Potri.003G020500.1 | 6.7261   | 16.7548  | -1.3167 | Down | 1.43E-47  | 1.33E-46  |
| Unigene53393  | Potri.002G066800.1 | 12.3026  | 30.6454  | -1.3167 | Down | 1.71E-23  | 8.53E-23  |
| Unigene62259  | Potri.001G369500.1 | 5.92     | 14.7469  | -1.3167 | Down | 9.99E-26  | 5.34E-25  |
| Unigene51858  | Potri.014G137300.1 | 26.0133  | 64.8005  | -1.3168 | Down | 5.85E-28  | 3.35E-27  |
| Unigene90955  | Potri.015G070200.1 | 2.984    | 7.4343   | -1.3169 | Down | 7.00E-06  | 1.50E-05  |
| Unigene14426  | Potri.009G115100.1 | 5.4752   | 13.6408  | -1.3169 | Down | 7.00E-06  | 1.50E-05  |
| Unigene41959  | Potri.016G091700.4 | 7.8396   | 19.5317  | -1.317  | Down | 1.90E-19  | 8.27E-19  |
| Unigene63895  | Potri.009G167000.1 | 3.8012   | 9.4704   | -1.317  | Down | 3.54E-08  | 9.06E-08  |

|               |                    |         |          |         |      |           |           |
|---------------|--------------------|---------|----------|---------|------|-----------|-----------|
| Unigene34807  | Potri.006G153100.3 | 3.5843  | 8.93     | -1.317  | Down | 7.00E-06  | 1.50E-05  |
| Unigene2120   | Potri.005G119500.1 | 11.6043 | 28.911   | -1.317  | Down | 7.58E-33  | 4.98E-32  |
| Unigene61     | Potri.001G229000.1 | 8.8633  | 22.082   | -1.317  | Down | 3.54E-08  | 9.06E-08  |
| Unigene30059  | Potri.015G012400.5 | 12.0421 | 30.0058  | -1.3172 | Down | 8.14E-29  | 4.78E-28  |
| Unigene19451  | Potri.005G209900.2 | 27.2788 | 67.975   | -1.3172 | Down | 1.31E-42  | 1.09E-41  |
| Unigene85252  | Potri.001G213900.1 | 25.3429 | 63.1482  | -1.3172 | Down | 8.14E-29  | 4.78E-28  |
| Unigene111326 | Potri.017G087700.2 | 21.637  | 53.9282  | -1.3175 | Down | 2.62E-20  | 1.18E-19  |
| Unigene102454 | Potri.014G190300.1 | 40.3653 | 100.6006 | -1.3175 | Down | 1.10E-45  | 9.76E-45  |
| Unigene102003 | Potri.008G168100.3 | 10.5893 | 26.3928  | -1.3175 | Down | 6.95E-11  | 2.08E-10  |
| Unigene54004  | Potri.002G007100.1 | 38.3602 | 95.6065  | -1.3175 | Down | 6.67E-32  | 4.27E-31  |
| Unigene10875  | Potri.019G019600.2 | 5.5225  | 13.7649  | -1.3176 | Down | 3.28E-53  | 3.42E-52  |
| Unigene13635  | Potri.016G055600.4 | 3.1199  | 7.7762   | -1.3176 | Down | 6.95E-11  | 2.08E-10  |
| Unigene10862  | Potri.006G027100.2 | 12.6317 | 31.4838  | -1.3176 | Down | 5.90E-102 | 1.29E-100 |
| Unigene1859   | Potri.T048600.1    | 28.5138 | 71.077   | -1.3177 | Down | 2.05E-51  | 2.06E-50  |
| Unigene38221  | Potri.015G032500.3 | 3.1443  | 7.8378   | -1.3177 | Down | 1.29E-08  | 3.39E-08  |
| Unigene933    | Potri.008G198400.1 | 1.7325  | 4.3186   | -1.3177 | Down | 1.29E-08  | 3.39E-08  |
| Unigene56595  | Potri.001G307600.3 | 7.7644  | 19.3545  | -1.3177 | Down | 5.64E-23  | 2.77E-22  |
| Unigene53074  | Potri.013G059800.6 | 15.0599 | 37.5439  | -1.3179 | Down | 1.42E-13  | 4.85E-13  |
| Unigene42777  | Potri.011G079600.5 | 35.4252 | 88.3132  | -1.3179 | Down | 1.27E-80  | 2.10E-79  |
| Unigene48001  | Potri.010G176500.1 | 19.4536 | 48.4994  | -1.3179 | Down | 1.69E-18  | 7.11E-18  |
| Unigene40518  | Potri.008G118500.4 | 38.7545 | 96.6155  | -1.3179 | Down | 1.61E-42  | 1.34E-41  |
| Unigene20593  | Potri.002G049800.2 | 10.4487 | 26.0484  | -1.3179 | Down | 1.42E-13  | 4.85E-13  |
| Unigene41087  | Potri.015G083800.1 | 17.1774 | 42.829   | -1.3181 | Down | 2.96E-16  | 1.14E-15  |
| Unigene39086  | Potri.013G067400.2 | 2.348   | 5.8543   | -1.3181 | Down | 2.52E-06  | 5.61E-06  |
| Unigene30269  | Potri.011G104000.1 | 11.8143 | 29.457   | -1.3181 | Down | 2.55E-11  | 7.84E-11  |
| Unigene53594  | Potri.011G002500.2 | 5.934   | 14.7955  | -1.3181 | Down | 2.52E-06  | 5.61E-06  |
| Unigene26119  | Potri.007G121600.6 | 23.9538 | 59.7248  | -1.3181 | Down | 3.62E-21  | 1.67E-20  |
| Unigene6930   | Potri.005G123100.3 | 3.008   | 7.5      | -1.3181 | Down | 2.52E-06  | 5.61E-06  |
| Unigene2084   | Potri.003G072100.1 | 6.9626  | 17.36    | -1.3181 | Down | 2.55E-11  | 7.84E-11  |
| Unigene8566   | Potri.002G237500.1 | 5.7008  | 14.214   | -1.3181 | Down | 2.52E-06  | 5.61E-06  |
| Unigene23704  | Potri.001G345900.2 | 6.1871  | 15.4265  | -1.3181 | Down | 2.55E-11  | 7.84E-11  |
| Unigene10618  | Potri.019G028000.1 | 7.1403  | 17.8054  | -1.3183 | Down | 1.46E-110 | 3.55E-109 |
| Unigene37800  | Potri.013G086700.3 | 13.6052 | 33.9269  | -1.3183 | Down | 5.23E-14  | 1.83E-13  |
| Unigene9983   | Potri.010G021400.3 | 17.2059 | 42.9074  | -1.3183 | Down | 1.34E-21  | 6.31E-21  |
| Unigene42802  | Potri.012G023700.1 | 30.2785 | 75.5138  | -1.3184 | Down | 2.10E-107 | 4.90E-106 |
| Unigene2076   | Potri.002G047200.1 | 8.7383  | 21.7924  | -1.3184 | Down | 1.10E-16  | 4.29E-16  |
| Unigene53162  | Potri.017G071700.5 | 31.7443 | 79.1734  | -1.3185 | Down | 1.39E-29  | 8.33E-29  |
| Unigene59622  | Potri.009G152500.1 | 3.08    | 7.6817   | -1.3185 | Down | 2.33E-19  | 1.01E-18  |
| Unigene11692  | Potri.004G004800.1 | 8.3256  | 20.7646  | -1.3185 | Down | 2.63E-47  | 2.43E-46  |



|               |                     |         |         |         |      |           |           |
|---------------|---------------------|---------|---------|---------|------|-----------|-----------|
| Unigene12874  | Potri.008G185300.1  | 5.0645  | 12.6331 | -1.3187 | Down | 1.14E-32  | 7.45E-32  |
| Unigene111729 | Potri.017G148800.1  | 33.0322 | 82.4137 | -1.319  | Down | 7.20E-31  | 4.48E-30  |
| Unigene35857  | Potri.017G034900.1  | 7.8743  | 19.6461 | -1.319  | Down | 1.73E-09  | 4.79E-09  |
| Unigene49024  | Potri.015G147200.1  | 19.9819 | 49.8538 | -1.319  | Down | 1.73E-41  | 1.41E-40  |
| Unigene52907  | Potri.013G048500.1  | 2.6444  | 6.5976  | -1.319  | Down | 5.43E-04  | 9.60E-04  |
| Unigene7700   | Potri.010G216300.2  | 8.8957  | 22.1943 | -1.319  | Down | 1.51E-17  | 6.11E-17  |
| Unigene37897  | Potri.009G014700.2  | 29.0447 | 72.4651 | -1.319  | Down | 3.28E-28  | 1.89E-27  |
| Unigene50550  | Potri.008G117900.4  | 5.0985  | 12.7205 | -1.319  | Down | 1.73E-09  | 4.79E-09  |
| Unigene118705 | Potri.004G225600.3  | 1.492   | 3.7224  | -1.319  | Down | 5.43E-04  | 9.60E-04  |
| Unigene12101  | Potri.002G219300.1  | 2.6743  | 6.6723  | -1.319  | Down | 5.43E-04  | 9.60E-04  |
| Unigene38296  | Potri.002G107400.2  | 3.4185  | 8.5291  | -1.319  | Down | 3.51E-36  | 2.51E-35  |
| Unigene103952 | Potri.001G275200.2  | 2.1218  | 5.2939  | -1.319  | Down | 5.43E-04  | 9.60E-04  |
| Unigene49668  | Potri.001G344000.1  | 15.3166 | 38.2187 | -1.3192 | Down | 1.22E-28  | 7.14E-28  |
| Unigene21231  | Potri.001G051400.1  | 6.5671  | 16.3869 | -1.3192 | Down | 2.93E-69  | 4.07E-68  |
| Unigene26141  | Potri.013G010900.2  | 23.2694 | 58.0658 | -1.3193 | Down | 1.19E-20  | 5.43E-20  |
| Unigene104261 | Potri.011G082500.1  | 6.1435  | 15.3312 | -1.3193 | Down | 2.65E-15  | 9.77E-15  |
| Unigene28956  | Potri.010G170400.1  | 6.2973  | 15.7146 | -1.3193 | Down | 1.01E-50  | 9.99E-50  |
| Unigene3805   | Potri.002G010500.1  | 3.469   | 8.6567  | -1.3193 | Down | 5.59E-18  | 2.31E-17  |
| Unigene11937  | Potri.001G355800.1  | 11.6043 | 28.9589 | -1.3193 | Down | 4.56E-29  | 2.70E-28  |
| Unigene28384  | Potri.016G046800.1  | 20.8925 | 52.139  | -1.3194 | Down | 2.09E-26  | 1.14E-25  |
| Unigene35461  | Potri.014G134100.2  | 31.7405 | 79.2112 | -1.3194 | Down | 2.09E-26  | 1.14E-25  |
| Unigene86760  | Potri.001G135000.2  | 21.5752 | 53.8429 | -1.3194 | Down | 2.09E-26  | 1.14E-25  |
| Unigene82238  | Potri.T034000.2     | 19.9409 | 49.7678 | -1.3195 | Down | 4.44E-21  | 2.05E-20  |
| Unigene4271   | Potri.006G254100.1  | 24.3436 | 60.7553 | -1.3195 | Down | 1.41E-51  | 1.43E-50  |
| Unigene24106  | Potri.006G219100.3  | 10.9362 | 27.2949 | -1.3195 | Down | 2.82E-46  | 2.55E-45  |
| Unigene23117  | Potri.006G201000.3  | 13.9748 | 34.8777 | -1.3195 | Down | 1.52E-40  | 1.21E-39  |
| Unigene12343  | Potri.004G123600.5  | 17.9104 | 44.6994 | -1.3195 | Down | 3.74E-32  | 2.41E-31  |
| Unigene83163  | Potri.008G221900.1  | 19.8372 | 49.5166 | -1.3197 | Down | 1.65E-21  | 7.72E-21  |
| Unigene73735  | Potri.007G095200.10 | 32.1973 | 80.3704 | -1.3197 | Down | 2.90E-27  | 1.62E-26  |
| Unigene2232   | Potri.005G190700.1  | 29.5756 | 73.827  | -1.3197 | Down | 2.65E-64  | 3.39E-63  |
| Unigene68006  | Potri.007G024300.1  | 2.4121  | 6.0214  | -1.3198 | Down | 3.30E-07  | 7.87E-07  |
| Unigene11817  | Potri.002G169700.2  | 5.2061  | 12.9961 | -1.3198 | Down | 1.33E-24  | 6.87E-24  |
| Unigene13211  | Potri.001G287000.1  | 8.9119  | 22.2471 | -1.3198 | Down | 2.37E-30  | 1.45E-29  |
| Unigene8535   | Potri.001G111100.3  | 18.0624 | 45.0897 | -1.3198 | Down | 7.69E-19  | 3.28E-18  |
| Unigene42407  | Potri.018G023000.1  | 10.1802 | 25.4154 | -1.3199 | Down | 1.61E-120 | 4.37E-119 |
| Unigene39793  | Potri.012G079000.1  | 20.3097 | 50.7049 | -1.32   | Down | 8.83E-31  | 5.48E-30  |
| Unigene27825  | Potri.009G111200.7  | 14.061  | 35.1054 | -1.32   | Down | 4.95E-25  | 2.59E-24  |
| Unigene66957  | Potri.008G029100.1  | 4.2628  | 10.6425 | -1.32   | Down | 3.63E-16  | 1.39E-15  |
| Unigene23593  | Potri.009G036900.1  | 23.0123 | 57.4578 | -1.3201 | Down | 3.30E-31  | 2.07E-30  |

|               |                    |         |          |         |      |          |          |
|---------------|--------------------|---------|----------|---------|------|----------|----------|
| Unigene22934  | Potri.008G216600.1 | 4.5323  | 11.3165  | -1.3201 | Down | 2.28E-22 | 1.10E-21 |
| Unigene29015  | Potri.014G109600.1 | 4.4844  | 11.1973  | -1.3202 | Down | 1.74E-13 | 5.93E-13 |
| Unigene34425  | Potri.018G001000.1 | 8.2827  | 20.6836  | -1.3203 | Down | 8.49E-23 | 4.14E-22 |
| Unigene7498   | Potri.T109100.1    | 4.5715  | 11.4175  | -1.3205 | Down | 6.43E-14 | 2.23E-13 |
| Unigene50163  | Potri.016G123600.1 | 6.9871  | 17.451   | -1.3205 | Down | 3.30E-85 | 5.81E-84 |
| Unigene118383 | Potri.009G129600.2 | 3.7642  | 9.4011   | -1.3205 | Down | 1.20E-07 | 2.95E-07 |
| Unigene49739  | Potri.009G044700.1 | 1.5454  | 3.8596   | -1.3205 | Down | 1.91E-04 | 3.56E-04 |
| Unigene15142  | Potri.004G205500.2 | 1.8607  | 4.6473   | -1.3205 | Down | 1.91E-04 | 3.56E-04 |
| Unigene33914  | Potri.003G011900.1 | 5.3868  | 13.4537  | -1.3205 | Down | 8.54E-11 | 2.55E-10 |
| Unigene11993  | Potri.013G074800.1 | 22.2275 | 55.5212  | -1.3207 | Down | 1.36E-42 | 1.13E-41 |
| Unigene93681  | Potri.010G149500.2 | 21.5375 | 53.7963  | -1.3207 | Down | 7.93E-52 | 8.04E-51 |
| Unigene43438  | Potri.002G071300.1 | 8.1434  | 20.3407  | -1.3207 | Down | 9.47E-49 | 9.01E-48 |
| Unigene45097  | Potri.019G058300.1 | 21.0742 | 52.6426  | -1.3208 | Down | 2.39E-33 | 1.59E-32 |
| Unigene5529   | Potri.010G029100.1 | 48.7763 | 121.8436 | -1.3208 | Down | 7.84E-59 | 9.13E-58 |
| Unigene15958  | Potri.010G020800.3 | 15.1529 | 37.853   | -1.3208 | Down | 2.38E-14 | 8.41E-14 |
| Unigene3325   | Potri.005G215800.1 | 5.3624  | 13.3951  | -1.3208 | Down | 1.85E-17 | 7.47E-17 |
| Unigene16351  | Potri.019G051500.1 | 26.9965 | 67.4437  | -1.3209 | Down | 1.08E-30 | 6.71E-30 |
| Unigene26168  | Potri.017G112900.1 | 10.6791 | 26.679   | -1.3209 | Down | 3.14E-11 | 9.60E-11 |
| Unigene48300  | Potri.015G092500.1 | 15.8868 | 39.6891  | -1.3209 | Down | 1.08E-30 | 6.71E-30 |
| Unigene18428  | Potri.006G168900.1 | 5.8719  | 14.6701  | -1.321  | Down | 7.10E-44 | 6.07E-43 |
| Unigene39963  | Potri.006G122300.1 | 20.0485 | 50.088   | -1.321  | Down | 7.10E-44 | 6.07E-43 |
| Unigene35590  | Potri.014G155800.2 | 36.3567 | 90.8452  | -1.3212 | Down | 4.20E-88 | 7.68E-87 |
| Unigene44672  | Potri.005G179800.3 | 16.1547 | 40.3675  | -1.3212 | Down | 1.84E-28 | 1.07E-27 |
| Unigene41764  | Potri.010G245100.1 | 26.3539 | 65.8566  | -1.3213 | Down | 1.39E-45 | 1.23E-44 |
| Unigene29036  | Potri.002G111500.1 | 13.4278 | 33.5546  | -1.3213 | Down | 4.45E-42 | 3.67E-41 |
| Unigene8289   | Potri.018G047800.1 | 15.2339 | 38.0702  | -1.3214 | Down | 6.86E-29 | 4.04E-28 |
| Unigene42880  | Potri.009G069700.1 | 10.3783 | 25.9354  | -1.3214 | Down | 5.35E-39 | 4.10E-38 |
| Unigene20676  | Potri.006G265300.1 | 28.5301 | 71.3004  | -1.3214 | Down | 6.46E-36 | 4.59E-35 |
| Unigene13751  | Potri.005G241400.2 | 4.5635  | 11.4045  | -1.3214 | Down | 2.10E-32 | 1.36E-31 |
| Unigene38086  | Potri.019G123300.1 | 21.7871 | 54.4566  | -1.3216 | Down | 3.51E-19 | 1.52E-18 |
| Unigene8      | Potri.016G003900.1 | 4.5835  | 11.4564  | -1.3216 | Down | 2.92E-33 | 1.94E-32 |
| Unigene102521 | Potri.014G079500.1 | 1.6985  | 4.2454   | -1.3216 | Down | 6.77E-05 | 1.32E-04 |
| Unigene101232 | Potri.011G078900.1 | 3.1397  | 7.8476   | -1.3216 | Down | 6.77E-05 | 1.32E-04 |
| Unigene39     | Potri.006G251500.1 | 4.8536  | 12.1314  | -1.3216 | Down | 9.54E-30 | 5.75E-29 |
| Unigene6333   | Potri.005G134600.1 | 17.2683 | 43.1619  | -1.3216 | Down | 1.20E-15 | 4.51E-15 |
| Unigene50070  | Potri.003G142400.1 | 1.3171  | 3.292    | -1.3216 | Down | 6.77E-05 | 1.32E-04 |
| Unigene13293  | Potri.003G077600.5 | 4.5636  | 11.4066  | -1.3216 | Down | 4.26E-12 | 1.36E-11 |
| Unigene31877  | Potri.002G172700.1 | 2.6491  | 6.6214   | -1.3216 | Down | 6.77E-05 | 1.32E-04 |
| Unigene41654  | Potri.002G159900.2 | 2.2578  | 5.6434   | -1.3216 | Down | 6.77E-05 | 1.32E-04 |

|               |                    |         |          |         |      |           |           |
|---------------|--------------------|---------|----------|---------|------|-----------|-----------|
| Unigene83281  | Potri.002G007100.1 | 6.9589  | 17.3936  | -1.3216 | Down | 1.59E-08  | 4.16E-08  |
| Unigene113561 | Potri.001G335000.4 | 7.2851  | 18.2089  | -1.3216 | Down | 1.59E-08  | 4.16E-08  |
| Unigene28283  | Potri.001G197500.1 | 2.7919  | 6.9783   | -1.3216 | Down | 6.77E-05  | 1.32E-04  |
| Unigene118668 | Potri.009G040500.1 | 1.9882  | 4.9696   | -1.3217 | Down | 6.77E-05  | 1.32E-04  |
| Unigene2000   | Potri.004G147700.1 | 1.8876  | 4.7181   | -1.3217 | Down | 1.59E-08  | 4.16E-08  |
| Unigene7374   | Potri.005G225000.2 | 26.0079 | 65.0143  | -1.3218 | Down | 3.90E-41  | 3.15E-40  |
| Unigene13928  | Potri.007G100200.1 | 4.5907  | 11.4776  | -1.322  | Down | 1.62E-27  | 9.17E-27  |
| Unigene48283  | Potri.005G221100.1 | 13.3457 | 33.3648  | -1.322  | Down | 1.57E-12  | 5.12E-12  |
| Unigene38127  | Potri.002G221500.1 | 5.2298  | 13.0761  | -1.3221 | Down | 5.82E-09  | 1.56E-08  |
| Unigene53141  | Potri.001G368600.1 | 25.7853 | 64.471   | -1.3221 | Down | 5.37E-24  | 2.72E-23  |
| Unigene40615  | Potri.019G052600.1 | 23.7895 | 59.4868  | -1.3222 | Down | 2.00E-24  | 1.03E-23  |
| Unigene21980  | Potri.007G113400.1 | 5.0813  | 12.7058  | -1.3222 | Down | 5.38E-66  | 7.10E-65  |
| Unigene51809  | Potri.T078000.1    | 1.9743  | 4.9377   | -1.3225 | Down | 2.41E-05  | 4.92E-05  |
| Unigene1363   | Potri.017G047600.1 | 4.8994  | 12.2535  | -1.3225 | Down | 2.77E-25  | 1.46E-24  |
| Unigene20594  | Potri.016G080500.2 | 3.7433  | 9.3621   | -1.3225 | Down | 2.13E-09  | 5.87E-09  |
| Unigene48773  | Potri.011G135400.2 | 2.4176  | 6.0464   | -1.3225 | Down | 2.41E-05  | 4.92E-05  |
| Unigene37591  | Potri.009G088600.1 | 11.2704 | 28.1875  | -1.3225 | Down | 2.14E-13  | 7.26E-13  |
| Unigene38159  | Potri.007G045400.1 | 4.7798  | 11.9544  | -1.3225 | Down | 2.13E-09  | 5.87E-09  |
| Unigene27456  | Potri.006G204600.1 | 4.6008  | 11.5068  | -1.3225 | Down | 2.41E-05  | 4.93E-05  |
| Unigene26979  | Potri.005G227300.4 | 3.8397  | 9.6031   | -1.3225 | Down | 2.41E-05  | 4.93E-05  |
| Unigene42299  | Potri.005G140100.1 | 3.1938  | 7.9879   | -1.3225 | Down | 2.41E-05  | 4.92E-05  |
| Unigene44723  | Potri.016G048600.2 | 13.7088 | 34.2879  | -1.3226 | Down | 1.79E-41  | 1.45E-40  |
| Unigene109217 | Potri.011G167300.1 | 65.318  | 163.3821 | -1.3227 | Down | 4.00E-54  | 4.25E-53  |
| Unigene43021  | Potri.002G143000.1 | 10.3207 | 25.8148  | -1.3227 | Down | 1.03E-25  | 5.52E-25  |
| Unigene33499  | Potri.010G193300.1 | 34.8317 | 87.1312  | -1.3228 | Down | 4.10E-71  | 5.86E-70  |
| Unigene40056  | Potri.003G097800.1 | 2.9225  | 7.3113   | -1.3229 | Down | 7.80E-10  | 2.20E-09  |
| Unigene41137  | Potri.008G069200.1 | 13.3743 | 33.461   | -1.323  | Down | 2.92E-14  | 1.03E-13  |
| Unigene111541 | Potri.009G012900.1 | 19.2874 | 48.2566  | -1.3231 | Down | 1.16E-18  | 4.91E-18  |
| Unigene37091  | Potri.013G018800.2 | 7.0078  | 17.5354  | -1.3232 | Down | 2.86E-10  | 8.30E-10  |
| Unigene44511  | Potri.012G096300.1 | 9.3551  | 23.4089  | -1.3232 | Down | 1.77E-23  | 8.82E-23  |
| Unigene37821  | Potri.011G148800.1 | 10.2326 | 25.6047  | -1.3232 | Down | 2.86E-10  | 8.30E-10  |
| Unigene33190  | Potri.010G209000.1 | 26.1168 | 65.3486  | -1.3232 | Down | 1.31E-53  | 1.38E-52  |
| Unigene44110  | Potri.006G234400.1 | 45.2272 | 113.1677 | -1.3232 | Down | 6.86E-162 | 2.72E-160 |
| Unigene32202  | Potri.004G207400.1 | 18.4999 | 46.2908  | -1.3232 | Down | 3.99E-97  | 8.22E-96  |
| Unigene47126  | Potri.003G154300.8 | 3.0834  | 7.7156   | -1.3233 | Down | 8.65E-06  | 1.84E-05  |
| Unigene22198  | Potri.001G219700.1 | 9.9281  | 24.8441  | -1.3233 | Down | 1.59E-107 | 3.72E-106 |
| Unigene82904  | Potri.012G093000.2 | 22.239  | 55.6527  | -1.3234 | Down | 6.59E-24  | 3.33E-23  |
| Unigene73     | Potri.011G006100.1 | 4.9426  | 12.3698  | -1.3235 | Down | 2.45E-24  | 1.26E-23  |
| Unigene14739  | Potri.005G169400.3 | 7.2157  | 18.0594  | -1.3235 | Down | 1.05E-10  | 3.12E-10  |

|               |                     |         |          |         |      |           |           |
|---------------|---------------------|---------|----------|---------|------|-----------|-----------|
| Unigene112782 | Potri.001G173800.1  | 9.8556  | 24.6665  | -1.3235 | Down | 1.05E-10  | 3.12E-10  |
| Unigene18243  | Potri.T071500.1     | 7.6241  | 19.0817  | -1.3236 | Down | 5.94E-20  | 2.64E-19  |
| Unigene5862   | Potri.010G253200.1  | 14.677  | 36.7374  | -1.3237 | Down | 2.21E-20  | 9.94E-20  |
| Unigene31204  | Potri.010G056900.5  | 23.5761 | 59.0141  | -1.3237 | Down | 5.35E-30  | 3.24E-29  |
| Unigene41854  | Potri.014G197300.1  | 2.7811  | 6.9619   | -1.3238 | Down | 3.11E-06  | 6.89E-06  |
| Unigene4143   | Potri.004G164500.1  | 12.1357 | 30.3792  | -1.3238 | Down | 3.86E-11  | 1.17E-10  |
| Unigene39610  | Potri.003G120800.1  | 5.8985  | 14.7657  | -1.3238 | Down | 8.20E-21  | 3.75E-20  |
| Unigene108987 | Potri.003G076100.1  | 12.0207 | 30.0913  | -1.3238 | Down | 3.86E-11  | 1.17E-10  |
| Unigene39968  | Potri.003G059500.2  | 6.3409  | 15.8732  | -1.3238 | Down | 3.86E-11  | 1.17E-10  |
| Unigene63688  | Potri.016G045800.2  | 1.5353  | 3.8434   | -1.3239 | Down | 3.11E-06  | 6.89E-06  |
| Unigene25392  | Potri.001G373500.2  | 23.1543 | 57.9647  | -1.3239 | Down | 1.92E-40  | 1.52E-39  |
| Unigene29131  | Potri.013G120300.12 | 6.7596  | 16.9228  | -1.324  | Down | 3.05E-21  | 1.41E-20  |
| Unigene64196  | Potri.012G041300.4  | 3.6398  | 9.1126   | -1.324  | Down | 2.03E-16  | 7.86E-16  |
| Unigene32683  | Potri.001G114600.1  | 12.1136 | 30.3267  | -1.324  | Down | 7.18E-41  | 5.75E-40  |
| Unigene79972  | Potri.001G321600.1  | 125.905 | 315.2488 | -1.3242 | Down | 4.38E-118 | 1.16E-116 |
| Unigene32378  | Potri.018G142700.2  | 6.2845  | 15.7374  | -1.3243 | Down | 9.10E-28  | 5.18E-27  |
| Unigene35779  | Potri.005G178300.2  | 4.8424  | 12.1261  | -1.3243 | Down | 1.12E-06  | 2.57E-06  |
| Unigene63957  | Potri.001G392600.2  | 2.6489  | 6.6333   | -1.3243 | Down | 1.12E-06  | 2.57E-06  |
| Unigene10261  | Potri.009G160600.1  | 6.8546  | 17.1674  | -1.3245 | Down | 1.93E-12  | 6.26E-12  |
| Unigene33331  | Potri.006G230000.4  | 23.5359 | 58.9432  | -1.3245 | Down | 6.27E-50  | 6.11E-49  |
| Unigene40084  | Potri.006G110100.2  | 23.2358 | 58.1917  | -1.3245 | Down | 6.27E-50  | 6.11E-49  |
| Unigene76202  | Potri.002G237500.1  | 25.5295 | 63.9391  | -1.3245 | Down | 2.17E-23  | 1.08E-22  |
| Unigene85442  | Potri.018G100900.4  | 34.9764 | 87.601   | -1.3246 | Down | 6.30E-40  | 4.93E-39  |
| Unigene29247  | Potri.018G070200.2  | 8.6933  | 21.7737  | -1.3246 | Down | 3.83E-18  | 1.59E-17  |
| Unigene20932  | Potri.019G055000.2  | 46.443  | 116.3338 | -1.3247 | Down | 7.49E-47  | 6.85E-46  |
| Unigene40626  | Potri.017G059400.2  | 41.2258 | 103.2623 | -1.3247 | Down | 4.59E-52  | 4.68E-51  |
| Unigene18905  | Potri.008G207000.2  | 2.6595  | 6.6617   | -1.3247 | Down | 4.07E-07  | 9.66E-07  |
| Unigene28827  | Potri.006G281400.2  | 14.895  | 37.3101  | -1.3247 | Down | 1.46E-35  | 1.03E-34  |
| Unigene54185  | Potri.006G105800.1  | 10.9705 | 27.4796  | -1.3247 | Down | 7.12E-13  | 2.36E-12  |
| Unigene6298   | Potri.004G040900.5  | 17.2816 | 43.2883  | -1.3247 | Down | 1.42E-18  | 6.00E-18  |
| Unigene8485   | Potri.001G037300.4  | 19.7178 | 49.3906  | -1.3247 | Down | 1.46E-35  | 1.03E-34  |
| Unigene43817  | Potri.006G120200.1  | 13.6683 | 34.2417  | -1.3249 | Down | 4.17E-25  | 2.19E-24  |
| Unigene23912  | Potri.006G023100.1  | 3.276   | 8.2071   | -1.3249 | Down | 2.63E-13  | 8.89E-13  |
| Unigene2610   | Potri.002G052300.1  | 12.604  | 31.5741  | -1.3249 | Down | 5.28E-19  | 2.27E-18  |
| Unigene41763  | Potri.014G060100.2  | 16.5484 | 41.4587  | -1.325  | Down | 1.96E-19  | 8.55E-19  |
| Unigene74538  | Potri.013G058500.1  | 7.4254  | 18.6043  | -1.3251 | Down | 1.48E-07  | 3.63E-07  |
| Unigene2876   | Potri.008G082700.1  | 2.4468  | 6.1305   | -1.3251 | Down | 9.70E-14  | 3.34E-13  |
| Unigene83289  | Potri.001G289200.1  | 5.9846  | 14.9945  | -1.3251 | Down | 1.48E-07  | 3.63E-07  |
| Unigene22462  | Potri.004G183200.1  | 2.234   | 5.5978   | -1.3252 | Down | 3.59E-14  | 1.26E-13  |

|               |                    |         |          |         |      |           |           |
|---------------|--------------------|---------|----------|---------|------|-----------|-----------|
| Unigene20482  | Potri.008G125800.1 | 11.9412 | 29.9221  | -1.3253 | Down | 3.59E-14  | 1.26E-13  |
| Unigene64896  | Potri.005G194900.1 | 4.1238  | 10.3333  | -1.3253 | Down | 3.59E-14  | 1.26E-13  |
| Unigene110094 | Potri.016G134700.4 | 23.397  | 58.6339  | -1.3254 | Down | 3.74E-21  | 1.73E-20  |
| Unigene52114  | Potri.009G058000.1 | 12.2995 | 30.8231  | -1.3254 | Down | 1.33E-14  | 4.75E-14  |
| Unigene34823  | Potri.004G163800.2 | 8.1377  | 20.3929  | -1.3254 | Down | 2.95E-53  | 3.08E-52  |
| Unigene46182  | Potri.014G135900.2 | 56.1001 | 140.5941 | -1.3255 | Down | 1.77E-80  | 2.92E-79  |
| Unigene52760  | Potri.003G006200.2 | 13.5547 | 33.971   | -1.3255 | Down | 1.39E-21  | 6.52E-21  |
| Unigene28802  | Potri.008G012200.2 | 5.3934  | 13.5174  | -1.3256 | Down | 4.90E-15  | 1.79E-14  |
| Unigene16183  | Potri.014G155100.1 | 13.3407 | 33.4388  | -1.3257 | Down | 1.81E-15  | 6.75E-15  |
| Unigene17670  | Potri.013G077900.1 | 17.4897 | 43.8384  | -1.3257 | Down | 2.15E-29  | 1.29E-28  |
| Unigene6201   | Potri.011G112800.2 | 9.4454  | 23.675   | -1.3257 | Down | 1.81E-15  | 6.75E-15  |
| Unigene50713  | Potri.009G074500.1 | 3.0563  | 7.6607   | -1.3257 | Down | 1.96E-08  | 5.11E-08  |
| Unigene53500  | Potri.003G092200.1 | 9.0033  | 22.5671  | -1.3257 | Down | 1.96E-08  | 5.11E-08  |
| Unigene102773 | Potri.001G407600.1 | 4.3724  | 10.9596  | -1.3257 | Down | 1.96E-08  | 5.11E-08  |
| Unigene90577  | Potri.013G154500.1 | 14.4572 | 36.2394  | -1.3258 | Down | 7.15E-23  | 3.49E-22  |
| Unigene56842  | Potri.007G042400.1 | 4.9821  | 12.4885  | -1.3258 | Down | 7.15E-23  | 3.49E-22  |
| Unigene50489  | Potri.004G094600.1 | 24.8112 | 62.1935  | -1.3258 | Down | 4.11E-44  | 3.53E-43  |
| Unigene51344  | Potri.014G121300.1 | 98.2829 | 246.3797 | -1.3259 | Down | 2.38E-146 | 8.26E-145 |
| Unigene108958 | Potri.005G178600.2 | 9.1923  | 23.0446  | -1.3259 | Down | 7.16E-09  | 1.91E-08  |
| Unigene35278  | Potri.005G134600.1 | 12.9738 | 32.5245  | -1.3259 | Down | 2.49E-16  | 9.61E-16  |
| Unigene46472  | Potri.004G055400.1 | 7.2916  | 18.2797  | -1.3259 | Down | 7.16E-09  | 1.91E-08  |
| Unigene26951  | Potri.002G103100.2 | 8.1495  | 20.4303  | -1.3259 | Down | 7.16E-09  | 1.91E-08  |
| Unigene32056  | Potri.006G275300.1 | 35.996  | 90.2468  | -1.326  | Down | 1.40E-122 | 3.87E-121 |
| Unigene38055  | Potri.003G212300.1 | 8.9977  | 22.5601  | -1.3261 | Down | 2.62E-09  | 7.19E-09  |
| Unigene98850  | Potri.018G027800.6 | 20.7628 | 52.0626  | -1.3262 | Down | 1.27E-17  | 5.16E-17  |
| Unigene45130  | Potri.008G154600.1 | 4.4606  | 11.1856  | -1.3263 | Down | 9.60E-10  | 2.70E-09  |
| Unigene60737  | Potri.002G029700.3 | 2.4253  | 6.0818   | -1.3263 | Down | 9.60E-10  | 2.70E-09  |
| Unigene17475  | Potri.001G163900.3 | 10.8986 | 27.33    | -1.3263 | Down | 4.70E-18  | 1.95E-17  |
| Unigene124    | Potri.001G199200.1 | 11.9334 | 29.9266  | -1.3264 | Down | 8.09E-111 | 1.97E-109 |
| Unigene4250   | Potri.014G196800.1 | 52.8594 | 132.5636 | -1.3265 | Down | 1.81E-69  | 2.52E-68  |
| Unigene73861  | Potri.001G383500.1 | 33.6221 | 84.3323  | -1.3267 | Down | 7.08E-29  | 4.16E-28  |
| Unigene53583  | Potri.005G004900.4 | 11.4636 | 28.7564  | -1.3268 | Down | 4.75E-11  | 1.44E-10  |
| Unigene87     | Potri.006G107500.1 | 11.3051 | 28.3602  | -1.3269 | Down | 3.64E-89  | 6.74E-88  |
| Unigene24974  | Potri.009G157400.4 | 22.2243 | 55.757   | -1.327  | Down | 6.34E-22  | 3.00E-21  |
| Unigene34455  | Potri.008G023700.2 | 4.7952  | 12.0313  | -1.3271 | Down | 8.77E-23  | 4.27E-22  |
| Unigene4438   | Potri.005G145900.1 | 19.7309 | 49.5035  | -1.3271 | Down | 2.36E-22  | 1.13E-21  |
| Unigene24737  | Potri.003G106200.3 | 21.4399 | 53.7912  | -1.3271 | Down | 2.36E-22  | 1.13E-21  |
| Unigene17064  | Potri.003G074300.1 | 5.2616  | 13.2009  | -1.3271 | Down | 2.36E-22  | 1.13E-21  |
| Unigene52138  | Potri.016G091200.1 | 19.8235 | 49.7397  | -1.3272 | Down | 3.26E-23  | 1.61E-22  |

|               |                     |         |          |         |      |          |          |
|---------------|---------------------|---------|----------|---------|------|----------|----------|
| Unigene5789   | Potri.015G072900.1  | 8.0878  | 20.2932  | -1.3272 | Down | 3.26E-23 | 1.61E-22 |
| Unigene3983   | Potri.012G074800.1  | 63.4092 | 159.1036 | -1.3272 | Down | 9.82E-67 | 1.31E-65 |
| Unigene76414  | Potri.016G036500.1  | 26.0767 | 65.4343  | -1.3273 | Down | 4.52E-24 | 2.30E-23 |
| Unigene32220  | Potri.012G060400.17 | 11.3131 | 28.3875  | -1.3273 | Down | 5.16E-68 | 7.03E-67 |
| Unigene11785  | Potri.010G041700.1  | 5.7051  | 14.3157  | -1.3273 | Down | 4.52E-24 | 2.30E-23 |
| Unigene7710   | Potri.004G177800.2  | 6.8527  | 17.1955  | -1.3273 | Down | 4.52E-24 | 2.30E-23 |
| Unigene45423  | Potri.002G198600.2  | 19.9326 | 50.0189  | -1.3273 | Down | 5.74E-59 | 6.70E-58 |
| Unigene37709  | Potri.008G047700.3  | 15.1414 | 37.9969  | -1.3274 | Down | 3.23E-13 | 1.09E-12 |
| Unigene51079  | Potri.001G116900.2  | 5.31    | 13.3253  | -1.3274 | Down | 3.23E-13 | 1.09E-12 |
| Unigene17885  | Potri.010G115200.1  | 15.8157 | 39.6927  | -1.3275 | Down | 3.24E-26 | 1.76E-25 |
| Unigene74696  | Potri.002G067800.1  | 29.2208 | 73.3334  | -1.3275 | Down | 8.69E-26 | 4.66E-25 |
| Unigene33006  | Potri.018G123100.1  | 7.3152  | 18.3605  | -1.3276 | Down | 1.68E-27 | 9.45E-27 |
| Unigene49287  | Potri.016G110700.1  | 11.0517 | 27.7373  | -1.3276 | Down | 4.40E-14 | 1.54E-13 |
| Unigene2316   | Potri.003G087200.1  | 21.6419 | 54.3163  | -1.3276 | Down | 3.80E-39 | 2.92E-38 |
| Unigene56322  | Potri.018G018800.1  | 2.0314  | 5.0988   | -1.3277 | Down | 6.02E-15 | 2.19E-14 |
| Unigene110587 | Potri.012G111400.1  | 30.6685 | 76.977   | -1.3277 | Down | 6.24E-28 | 3.57E-27 |
| Unigene24092  | Potri.018G017100.1  | 6.4044  | 16.08    | -1.3281 | Down | 8.80E-35 | 6.06E-34 |
| Unigene42675  | Potri.011G135900.1  | 6.363   | 15.9766  | -1.3282 | Down | 1.23E-35 | 8.65E-35 |
| Unigene42887  | Potri.002G031600.1  | 6.3301  | 15.8948  | -1.3283 | Down | 2.39E-37 | 1.76E-36 |
| Unigene17461  | Potri.011G041800.1  | 10.0695 | 25.2876  | -1.3284 | Down | 7.77E-22 | 3.67E-21 |
| Unigene102262 | Potri.010G028600.2  | 19.8372 | 49.8176  | -1.3284 | Down | 7.77E-22 | 3.67E-21 |
| Unigene37286  | Potri.008G048800.3  | 61.9202 | 155.4993 | -1.3284 | Down | 2.37E-61 | 2.88E-60 |
| Unigene31945  | Potri.006G005800.1  | 5.0207  | 12.6083  | -1.3284 | Down | 9.07E-41 | 7.24E-40 |
| Unigene53890  | Potri.013G002400.2  | 13.808  | 34.6791  | -1.3286 | Down | 1.49E-23 | 7.44E-23 |
| Unigene37032  | Potri.009G134600.4  | 21.1841 | 53.2069  | -1.3286 | Down | 7.68E-25 | 4.00E-24 |
| Unigene38763  | Potri.003G009500.1  | 37.6559 | 94.576   | -1.3286 | Down | 9.45E-47 | 8.63E-46 |
| Unigene17077  | Potri.019G059100.2  | 3.9896  | 10.0209  | -1.3287 | Down | 1.07E-25 | 5.69E-25 |
| Unigene43065  | Potri.005G066700.1  | 2.5554  | 6.4184   | -1.3287 | Down | 2.86E-25 | 1.51E-24 |
| Unigene47491  | Potri.012G038900.1  | 24.9539 | 62.6833  | -1.3288 | Down | 1.06E-28 | 6.22E-28 |
| Unigene32106  | Potri.001G206600.1  | 7.5487  | 18.9619  | -1.3288 | Down | 2.85E-28 | 1.65E-27 |
| Unigene87115  | Potri.019G051300.1  | 23.8669 | 59.9548  | -1.3289 | Down | 5.52E-30 | 3.35E-29 |
| Unigene45930  | Potri.006G126300.3  | 43.9853 | 110.5093 | -1.3291 | Down | 2.92E-37 | 2.15E-36 |
| Unigene48789  | Potri.009G038300.4  | 21.0638 | 52.9358  | -1.3295 | Down | 7.72E-72 | 1.12E-70 |
| Unigene48656  | Potri.T001700.1     | 7.9479  | 19.9799  | -1.3299 | Down | 7.08E-18 | 2.91E-17 |
| Unigene33013  | Potri.019G055000.4  | 2.5065  | 6.301    | -1.3299 | Down | 1.82E-07 | 4.43E-07 |
| Unigene103304 | Potri.018G000700.1  | 1.4285  | 3.591    | -1.3299 | Down | 1.39E-06 | 3.16E-06 |
| Unigene2301   | Potri.017G151600.2  | 3.3654  | 8.46     | -1.3299 | Down | 2.42E-08 | 6.24E-08 |
| Unigene17559  | Potri.017G101900.1  | 4.3882  | 11.0312  | -1.3299 | Down | 1.39E-06 | 3.16E-06 |
| Unigene7021   | Potri.016G114500.6  | 2.6802  | 6.7376   | -1.3299 | Down | 8.39E-05 | 1.62E-04 |

|               |                     |         |          |         |      |          |          |
|---------------|---------------------|---------|----------|---------|------|----------|----------|
| Unigene118308 | Potri.016G005100.1  | 7.3548  | 18.489   | -1.3299 | Down | 1.46E-13 | 5.01E-13 |
| Unigene76675  | Potri.015G072900.1  | 13.8025 | 34.6974  | -1.3299 | Down | 1.46E-13 | 5.01E-13 |
| Unigene75427  | Potri.015G019200.10 | 7.5949  | 19.0925  | -1.3299 | Down | 6.63E-08 | 1.66E-07 |
| Unigene73529  | Potri.014G053300.1  | 18.0311 | 45.3274  | -1.3299 | Down | 3.75E-16 | 1.44E-15 |
| Unigene18080  | Potri.014G012300.1  | 1.809   | 4.5475   | -1.3299 | Down | 1.59E-10 | 4.67E-10 |
| Unigene71384  | Potri.012G088200.1  | 17.088  | 42.9566  | -1.3299 | Down | 7.39E-15 | 2.68E-14 |
| Unigene39526  | Potri.011G135300.2  | 11.6353 | 29.2493  | -1.3299 | Down | 2.15E-56 | 2.39E-55 |
| Unigene18978  | Potri.011G096600.1  | 2.1686  | 5.4515   | -1.3299 | Down | 1.07E-05 | 2.25E-05 |
| Unigene6394   | Potri.010G195900.1  | 4.8534  | 12.2008  | -1.3299 | Down | 3.23E-09 | 8.79E-09 |
| Unigene28394  | Potri.009G162800.1  | 1.8232  | 4.5832   | -1.3299 | Down | 8.39E-05 | 1.62E-04 |
| Unigene25417  | Potri.009G115100.1  | 5.6985  | 14.3253  | -1.3299 | Down | 3.85E-06 | 8.46E-06 |
| Unigene51212  | Potri.009G098000.1  | 19.4018 | 48.7732  | -1.3299 | Down | 4.99E-20 | 2.22E-19 |
| Unigene34631  | Potri.009G040500.3  | 12.08   | 30.3672  | -1.3299 | Down | 3.54E-34 | 2.40E-33 |
| Unigene28433  | Potri.008G178600.1  | 1.7865  | 4.4909   | -1.3299 | Down | 3.85E-06 | 8.46E-06 |
| Unigene1662   | Potri.008G155400.1  | 1.9063  | 4.7921   | -1.3299 | Down | 1.07E-05 | 2.25E-05 |
| Unigene24646  | Potri.008G016900.1  | 2.4526  | 6.1654   | -1.3299 | Down | 8.39E-05 | 1.62E-04 |
| Unigene99731  | Potri.007G144800.3  | 2.9919  | 7.5213   | -1.3299 | Down | 1.07E-05 | 2.25E-05 |
| Unigene97089  | Potri.006G242500.1  | 2.5823  | 6.4915   | -1.3299 | Down | 1.39E-06 | 3.16E-06 |
| Unigene41608  | Potri.006G220900.5  | 10.1385 | 25.4866  | -1.3299 | Down | 3.96E-13 | 1.33E-12 |
| Unigene6685   | Potri.006G075500.1  | 6.4204  | 16.14    | -1.3299 | Down | 1.59E-10 | 4.67E-10 |
| Unigene48129  | Potri.005G259700.1  | 7.6203  | 19.1564  | -1.3299 | Down | 1.18E-09 | 3.30E-09 |
| Unigene40865  | Potri.005G097000.1  | 2.3434  | 5.891    | -1.3299 | Down | 1.39E-06 | 3.16E-06 |
| Unigene102223 | Potri.004G149200.1  | 2.3745  | 5.9692   | -1.3299 | Down | 8.39E-05 | 1.62E-04 |
| Unigene66363  | Potri.003G071500.1  | 3.7025  | 9.3076   | -1.3299 | Down | 2.99E-05 | 6.03E-05 |
| Unigene42198  | Potri.003G031000.2  | 13.8302 | 34.767   | -1.3299 | Down | 1.85E-20 | 8.39E-20 |
| Unigene28026  | Potri.002G253400.1  | 1.9931  | 5.0104   | -1.3299 | Down | 2.37E-04 | 4.36E-04 |
| Unigene25866  | Potri.002G179500.2  | 36.0352 | 90.587   | -1.3299 | Down | 1.58E-58 | 1.83E-57 |
| Unigene61209  | Potri.002G160300.3  | 2.6643  | 6.6975   | -1.3299 | Down | 1.07E-05 | 2.25E-05 |
| Unigene110291 | Potri.002G125400.3  | 3.5283  | 8.8697   | -1.3299 | Down | 2.37E-04 | 4.36E-04 |
| Unigene75152  | Potri.001G256100.1  | 4.0876  | 10.2757  | -1.3299 | Down | 8.39E-05 | 1.62E-04 |
| Unigene19073  | Potri.001G073300.1  | 7.4175  | 18.6465  | -1.3299 | Down | 1.39E-16 | 5.42E-16 |
| Unigene45519  | Potri.001G027400.1  | 5.8319  | 14.6604  | -1.3299 | Down | 2.42E-08 | 6.24E-08 |
| Unigene7299   | Potri.005G212400.1  | 1.7173  | 4.3172   | -1.33   | Down | 1.18E-09 | 3.30E-09 |
| Unigene77696  | Potri.006G114800.2  | 76.5284 | 192.4386 | -1.3303 | Down | 1.57E-69 | 2.19E-68 |
| Unigene45416  | Potri.006G204600.4  | 7.5693  | 19.0364  | -1.3305 | Down | 4.75E-49 | 4.55E-48 |
| Unigene11381  | Potri.006G191500.4  | 12.3711 | 31.1124  | -1.3305 | Down | 2.69E-96 | 5.48E-95 |
| Unigene86809  | Potri.018G145900.1  | 36.812  | 92.5836  | -1.3306 | Down | 8.88E-45 | 7.75E-44 |
| Unigene7283   | Potri.017G048700.1  | 36.288  | 91.2681  | -1.3306 | Down | 1.22E-42 | 1.01E-41 |
| Unigene88939  | Potri.007G008000.1  | 24.2881 | 61.0955  | -1.3308 | Down | 1.16E-33 | 7.77E-33 |

|               |                    |         |         |         |      |           |           |
|---------------|--------------------|---------|---------|---------|------|-----------|-----------|
| Unigene53884  | Potri.014G135200.1 | 18.8411 | 47.3979 | -1.3309 | Down | 8.28E-30  | 5.00E-29  |
| Unigene34035  | Potri.006G021900.1 | 19.6998 | 49.5582 | -1.3309 | Down | 6.32E-58  | 7.23E-57  |
| Unigene87296  | Potri.005G157100.1 | 23.4013 | 58.87   | -1.3309 | Down | 8.28E-30  | 5.00E-29  |
| Unigene42713  | Potri.003G046600.2 | 11.096  | 27.917  | -1.3311 | Down | 1.14E-50  | 1.13E-49  |
| Unigene23521  | Potri.002G226600.2 | 11.3116 | 28.4613 | -1.3312 | Down | 3.10E-24  | 1.58E-23  |
| Unigene33271  | Potri.019G035700.2 | 30.3833 | 76.451  | -1.3313 | Down | 4.32E-110 | 1.04E-108 |
| Unigene11565  | Potri.006G197600.1 | 15.5128 | 39.0339 | -1.3313 | Down | 6.06E-66  | 8.00E-65  |
| Unigene33008  | Potri.010G083400.2 | 11.6533 | 29.327  | -1.3315 | Down | 1.05E-38  | 7.96E-38  |
| Unigene2719   | Potri.010G023200.2 | 9.0322  | 22.7313 | -1.3315 | Down | 1.05E-55  | 1.16E-54  |
| Unigene45505  | Potri.006G226000.1 | 4.546   | 11.4413 | -1.3316 | Down | 4.44E-19  | 1.91E-18  |
| Unigene45718  | Potri.002G111500.1 | 9.8856  | 24.8808 | -1.3316 | Down | 1.20E-18  | 5.06E-18  |
| Unigene53406  | Potri.015G103500.1 | 6.2736  | 15.7914 | -1.3318 | Down | 2.34E-17  | 9.42E-17  |
| Unigene32719  | Potri.013G006600.1 | 17.4945 | 44.0378 | -1.3318 | Down | 3.64E-47  | 3.36E-46  |
| Unigene54047  | Potri.011G094100.4 | 7.1856  | 18.0869 | -1.3318 | Down | 2.34E-17  | 9.42E-17  |
| Unigene14271  | Potri.016G054200.2 | 5.2139  | 13.125  | -1.3319 | Down | 1.70E-16  | 6.62E-16  |
| Unigene23211  | Potri.005G079600.1 | 72.6923 | 182.988 | -1.3319 | Down | 1.43E-224 | 8.50E-223 |
| Unigene39231  | Potri.002G200000.1 | 6.2466  | 15.7246 | -1.3319 | Down | 1.70E-16  | 6.62E-16  |
| Unigene48134  | Potri.002G157200.1 | 5.1776  | 13.0346 | -1.332  | Down | 1.24E-15  | 4.65E-15  |
| Unigene116232 | Potri.008G039300.2 | 11.3572 | 28.5933 | -1.3321 | Down | 3.36E-15  | 1.23E-14  |
| Unigene27366  | Potri.003G082100.1 | 11.5153 | 28.9927 | -1.3321 | Down | 9.07E-15  | 3.27E-14  |
| Unigene22921  | Potri.019G116600.1 | 15.0056 | 37.7833 | -1.3322 | Down | 1.01E-26  | 5.60E-26  |
| Unigene21979  | Potri.010G220000.4 | 6.6186  | 16.6669 | -1.3324 | Down | 3.26E-49  | 3.13E-48  |
| Unigene32146  | Potri.007G032100.1 | 2.0341  | 5.1222  | -1.3324 | Down | 1.80E-13  | 6.12E-13  |
| Unigene80711  | Potri.006G222900.4 | 36.7028 | 92.426  | -1.3324 | Down | 6.58E-37  | 4.79E-36  |
| Unigene26602  | Potri.001G340900.1 | 23.2134 | 58.4582 | -1.3324 | Down | 6.24E-48  | 5.84E-47  |
| Unigene8689   | Potri.008G011300.1 | 31.4591 | 79.2263 | -1.3325 | Down | 1.26E-35  | 8.90E-35  |
| Unigene13833  | Potri.003G184400.1 | 3.141   | 7.9101  | -1.3325 | Down | 1.41E-24  | 7.30E-24  |
| Unigene4801   | Potri.017G007000.5 | 24.2368 | 61.0408 | -1.3326 | Down | 1.02E-23  | 5.13E-23  |
| Unigene22129  | Potri.010G195800.2 | 15.8099 | 39.8199 | -1.3327 | Down | 4.21E-55  | 4.56E-54  |
| Unigene45515  | Potri.T140700.1    | 4.2922  | 10.8116 | -1.3328 | Down | 9.72E-12  | 3.04E-11  |
| Unigene17333  | Potri.018G106800.5 | 29.9254 | 75.3819 | -1.3328 | Down | 1.10E-51  | 1.11E-50  |
| Unigene14944  | Potri.018G083100.1 | 29.9859 | 75.5302 | -1.3328 | Down | 8.34E-43  | 6.98E-42  |
| Unigene111136 | Potri.017G076400.1 | 11.5142 | 29.0032 | -1.3328 | Down | 9.72E-12  | 3.04E-11  |
| Unigene44321  | Potri.013G075300.2 | 5.1026  | 12.8531 | -1.3328 | Down | 9.72E-12  | 3.04E-11  |
| Unigene44996  | Potri.010G117700.1 | 8.3924  | 21.1391 | -1.3328 | Down | 1.25E-32  | 8.16E-32  |
| Unigene1540   | Potri.009G034900.5 | 26.0229 | 65.5513 | -1.3328 | Down | 7.67E-62  | 9.42E-61  |
| Unigene21948  | Potri.012G063500.2 | 19.3837 | 48.8362 | -1.3331 | Down | 5.09E-66  | 6.73E-65  |
| Unigene36164  | Potri.008G165700.1 | 7.3469  | 18.5095 | -1.3331 | Down | 7.18E-11  | 2.15E-10  |
| Unigene88236  | Potri.018G009100.1 | 14.0582 | 35.4216 | -1.3332 | Down | 2.02E-19  | 8.81E-19  |



|               |                    |         |          |         |      |           |           |
|---------------|--------------------|---------|----------|---------|------|-----------|-----------|
| Unigene7500   | Potri.007G036100.2 | 3.742   | 9.4286   | -1.3332 | Down | 1.95E-10  | 5.72E-10  |
| Unigene652    | Potri.004G236300.1 | 29.0506 | 73.1945  | -1.3332 | Down | 6.73E-83  | 1.15E-81  |
| Unigene102011 | Potri.003G140800.3 | 2.2829  | 5.7521   | -1.3332 | Down | 1.95E-10  | 5.72E-10  |
| Unigene42765  | Potri.T012800.1    | 13.0063 | 32.7752  | -1.3334 | Down | 3.21E-86  | 5.73E-85  |
| Unigene27820  | Potri.003G220300.1 | 5.3156  | 13.3951  | -1.3334 | Down | 5.33E-10  | 1.52E-09  |
| Unigene30843  | Potri.001G029800.1 | 7.5366  | 18.9916  | -1.3334 | Down | 5.33E-10  | 1.52E-09  |
| Unigene42492  | Potri.015G135400.2 | 8.6015  | 21.68    | -1.3337 | Down | 3.50E-48  | 3.29E-47  |
| Unigene5641   | Potri.009G162600.1 | 9.0682  | 22.8576  | -1.3338 | Down | 3.97E-09  | 1.08E-08  |
| Unigene50150  | Potri.001G349300.3 | 10.9689 | 27.6481  | -1.3338 | Down | 6.04E-63  | 7.55E-62  |
| Unigene33394  | Potri.003G100600.1 | 3.4456  | 8.6858   | -1.3339 | Down | 2.09E-16  | 8.10E-16  |
| Unigene39545  | Potri.017G077000.1 | 6.2207  | 15.6827  | -1.334  | Down | 1.38E-37  | 1.02E-36  |
| Unigene7449   | Potri.009G064500.1 | 5.883   | 14.8326  | -1.3341 | Down | 1.52E-15  | 5.69E-15  |
| Unigene27312  | Potri.002G126300.1 | 17.9112 | 45.1586  | -1.3341 | Down | 1.52E-15  | 5.69E-15  |
| Unigene95839  | Potri.012G094800.1 | 5.2645  | 13.2744  | -1.3343 | Down | 2.98E-08  | 7.65E-08  |
| Unigene103098 | Potri.006G011700.1 | 7.5891  | 19.1358  | -1.3343 | Down | 2.98E-08  | 7.65E-08  |
| Unigene42932  | Potri.005G222800.2 | 6.2435  | 15.7436  | -1.3343 | Down | 5.07E-35  | 3.51E-34  |
| Unigene53606  | Potri.005G094200.1 | 7.8262  | 19.7338  | -1.3343 | Down | 2.98E-08  | 7.65E-08  |
| Unigene89122  | Potri.017G148900.2 | 9.7536  | 24.5961  | -1.3344 | Down | 1.11E-14  | 4.00E-14  |
| Unigene49932  | Potri.003G031900.1 | 5.6383  | 14.2184  | -1.3344 | Down | 1.11E-14  | 4.00E-14  |
| Unigene22481  | Potri.011G119500.6 | 5.3455  | 13.4804  | -1.3345 | Down | 4.72E-21  | 2.18E-20  |
| Unigene32985  | Potri.002G158200.1 | 41.2937 | 104.1373 | -1.3345 | Down | 3.86E-98  | 8.07E-97  |
| Unigene37164  | Potri.016G130500.2 | 7.2299  | 18.2338  | -1.3346 | Down | 8.17E-08  | 2.04E-07  |
| Unigene43476  | Potri.005G148900.1 | 6.9499  | 17.5278  | -1.3346 | Down | 5.85E-46  | 5.24E-45  |
| Unigene6280   | Potri.014G176000.1 | 51.3805 | 129.5933 | -1.3347 | Down | 5.37E-51  | 5.35E-50  |
| Unigene48619  | Potri.014G058800.1 | 17.8749 | 45.0831  | -1.3347 | Down | 1.52E-26  | 8.35E-26  |
| Unigene3077   | Potri.007G033900.1 | 3.0841  | 7.779    | -1.3347 | Down | 8.15E-14  | 2.82E-13  |
| Unigene48335  | Potri.017G100100.2 | 13.0152 | 32.8322  | -1.3349 | Down | 2.21E-13  | 7.49E-13  |
| Unigene49269  | Potri.016G022400.1 | 14.259  | 35.97    | -1.3349 | Down | 2.94E-25  | 1.55E-24  |
| Unigene17057  | Potri.014G175400.5 | 4.2245  | 10.6569  | -1.3349 | Down | 2.25E-07  | 5.43E-07  |
| Unigene79047  | Potri.007G131800.1 | 12.744  | 32.1482  | -1.3349 | Down | 2.21E-13  | 7.49E-13  |
| Unigene81846  | Potri.003G103700.3 | 23.3666 | 58.9487  | -1.335  | Down | 7.91E-25  | 4.12E-24  |
| Unigene23563  | Potri.003G045000.1 | 22.3243 | 56.319   | -1.335  | Down | 3.23E-94  | 6.39E-93  |
| Unigene20716  | Potri.002G160700.5 | 34.5051 | 87.0461  | -1.335  | Down | 1.53E-42  | 1.27E-41  |
| Unigene26070  | Potri.006G186600.1 | 5.9956  | 15.1263  | -1.3351 | Down | 2.59E-30  | 1.59E-29  |
| Unigene84579  | Potri.018G124600.1 | 25.71   | 64.8704  | -1.3352 | Down | 1.86E-29  | 1.11E-28  |
| Unigene37044  | Potri.018G124000.1 | 18.0846 | 45.6292  | -1.3352 | Down | 7.84E-41  | 6.28E-40  |
| Unigene94053  | Potri.016G023700.2 | 47.8029 | 120.6108 | -1.3352 | Down | 1.11E-135 | 3.48E-134 |
| Unigene109747 | Potri.013G128300.9 | 26.6425 | 67.2223  | -1.3352 | Down | 5.70E-24  | 2.89E-23  |
| Unigene44472  | Potri.013G126300.4 | 13.0397 | 32.8996  | -1.3352 | Down | 1.55E-63  | 1.96E-62  |

|               |                    |         |          |         |      |           |           |
|---------------|--------------------|---------|----------|---------|------|-----------|-----------|
| Unigene53441  | Potri.013G115300.2 | 7.6967  | 19.4193  | -1.3352 | Down | 1.80E-18  | 7.56E-18  |
| Unigene22120  | Potri.005G012600.1 | 6.5207  | 16.4526  | -1.3352 | Down | 3.18E-57  | 3.60E-56  |
| Unigene29219  | Potri.018G059300.1 | 3.1428  | 7.9301   | -1.3353 | Down | 6.19E-07  | 1.45E-06  |
| Unigene28755  | Potri.010G074900.1 | 2.5538  | 6.4441   | -1.3353 | Down | 6.19E-07  | 1.45E-06  |
| Unigene8177   | Potri.007G124600.4 | 2.6743  | 6.7481   | -1.3353 | Down | 6.19E-07  | 1.45E-06  |
| Unigene22683  | Potri.005G234300.1 | 2.5888  | 6.5324   | -1.3353 | Down | 1.62E-12  | 5.28E-12  |
| Unigene1957   | Potri.004G079800.1 | 35.4973 | 89.5725  | -1.3353 | Down | 7.34E-67  | 9.84E-66  |
| Unigene51017  | Potri.001G026300.1 | 12.488  | 31.5109  | -1.3353 | Down | 1.62E-12  | 5.28E-12  |
| Unigene50453  | Potri.001G004800.1 | 5.211   | 13.1488  | -1.3353 | Down | 4.85E-18  | 2.01E-17  |
| Unigene107259 | Potri.008G126600.2 | 63.2227 | 159.5353 | -1.3354 | Down | 1.76E-50  | 1.73E-49  |
| Unigene39724  | Potri.008G085700.1 | 6.3008  | 15.8998  | -1.3354 | Down | 1.34E-28  | 7.81E-28  |
| Unigene29606  | Potri.003G000500.5 | 8.1133  | 20.4739  | -1.3354 | Down | 4.12E-23  | 2.03E-22  |
| Unigene12324  | Potri.T060900.1    | 15.52   | 39.169   | -1.3356 | Down | 9.65E-28  | 5.49E-27  |
| Unigene45368  | Potri.003G050600.1 | 12.8899 | 32.5309  | -1.3356 | Down | 2.88E-38  | 2.17E-37  |
| Unigene63877  | Potri.016G002300.5 | 4.6792  | 11.8107  | -1.3358 | Down | 1.71E-06  | 3.87E-06  |
| Unigene103757 | Potri.012G031600.1 | 1.4136  | 3.5682   | -1.3358 | Down | 1.19E-11  | 3.73E-11  |
| Unigene94861  | Potri.007G070700.1 | 11.6909 | 29.5091  | -1.3358 | Down | 9.50E-17  | 3.73E-16  |
| Unigene86122  | Potri.006G275400.2 | 26.2849 | 66.346   | -1.3358 | Down | 6.15E-32  | 3.94E-31  |
| Unigene58880  | Potri.002G111500.1 | 4.2524  | 10.7335  | -1.3358 | Down | 1.71E-06  | 3.87E-06  |
| Unigene7572   | Potri.001G060300.1 | 6.2463  | 15.7664  | -1.3358 | Down | 9.50E-17  | 3.73E-16  |
| Unigene23304  | Potri.005G117900.2 | 10.7385 | 27.1068  | -1.3359 | Down | 1.65E-31  | 1.04E-30  |
| Unigene43763  | Potri.016G001200.1 | 15.599  | 39.379   | -1.336  | Down | 9.60E-41  | 7.66E-40  |
| Unigene10042  | Potri.001G231500.1 | 2.9822  | 7.5287   | -1.336  | Down | 3.24E-11  | 9.90E-11  |
| Unigene31865  | Potri.018G127900.1 | 4.0893  | 10.3244  | -1.3361 | Down | 6.92E-16  | 2.62E-15  |
| Unigene31946  | Potri.011G032200.1 | 6.2947  | 15.8928  | -1.3362 | Down | 8.48E-87  | 1.52E-85  |
| Unigene25058  | Potri.008G066500.3 | 27.4468 | 69.3005  | -1.3362 | Down | 8.52E-30  | 5.14E-29  |
| Unigene68195  | Potri.013G111400.1 | 2.4409  | 6.1634   | -1.3363 | Down | 4.75E-06  | 1.03E-05  |
| Unigene109185 | Potri.012G140300.1 | 5.6037  | 14.1497  | -1.3363 | Down | 4.75E-06  | 1.03E-05  |
| Unigene9010   | Potri.010G176000.4 | 12.5641 | 31.7252  | -1.3363 | Down | 4.19E-20  | 1.87E-19  |
| Unigene7226   | Potri.009G093900.1 | 2.1981  | 5.5504   | -1.3363 | Down | 4.75E-06  | 1.03E-05  |
| Unigene53360  | Potri.008G045400.4 | 3.2     | 8.0801   | -1.3363 | Down | 4.75E-06  | 1.03E-05  |
| Unigene114944 | Potri.005G099800.1 | 17.1123 | 43.2099  | -1.3363 | Down | 4.19E-20  | 1.87E-19  |
| Unigene19015  | Potri.003G164300.2 | 8.2127  | 20.7378  | -1.3363 | Down | 1.87E-15  | 6.95E-15  |
| Unigene31192  | Potri.003G159000.4 | 3.3622  | 8.4898   | -1.3363 | Down | 4.75E-06  | 1.03E-05  |
| Unigene91693  | Potri.001G356800.1 | 77.0055 | 194.4445 | -1.3363 | Down | 1.20E-130 | 3.58E-129 |
| Unigene42525  | Potri.004G229300.2 | 10.5396 | 26.6157  | -1.3365 | Down | 2.29E-42  | 1.90E-41  |
| Unigene46843  | Potri.001G088200.1 | 59.5512 | 150.3927 | -1.3365 | Down | 2.43E-55  | 2.64E-54  |
| Unigene30447  | Potri.003G113500.3 | 33.4599 | 84.5071  | -1.3366 | Down | 1.73E-54  | 1.85E-53  |
| Unigene69802  | Potri.003G098200.1 | 4.9624  | 12.5332  | -1.3366 | Down | 3.04E-19  | 1.32E-18  |

|               |                    |         |          |         |      |           |           |
|---------------|--------------------|---------|----------|---------|------|-----------|-----------|
| Unigene193    | Potri.001G287000.1 | 12.076  | 30.498   | -1.3366 | Down | 2.65E-68  | 3.62E-67  |
| Unigene21872  | Potri.015G077900.2 | 7.0053  | 17.6935  | -1.3367 | Down | 2.87E-45  | 2.53E-44  |
| Unigene14561  | Potri.013G111500.5 | 21.3342 | 53.8847  | -1.3367 | Down | 1.88E-23  | 9.35E-23  |
| Unigene12306  | Potri.008G064900.1 | 23.5517 | 59.4887  | -1.3368 | Down | 7.54E-32  | 4.82E-31  |
| Unigene35181  | Potri.019G012300.3 | 3.5758  | 9.0334   | -1.337  | Down | 6.55E-10  | 1.86E-09  |
| Unigene35966  | Potri.017G000400.2 | 3.0215  | 7.6329   | -1.337  | Down | 1.32E-05  | 2.77E-05  |
| Unigene91090  | Potri.012G114000.1 | 2.6708  | 6.7471   | -1.337  | Down | 1.32E-05  | 2.77E-05  |
| Unigene46754  | Potri.010G172300.2 | 2.2053  | 5.571    | -1.337  | Down | 6.55E-10  | 1.86E-09  |
| Unigene3735   | Potri.009G067800.2 | 3.2386  | 8.1814   | -1.337  | Down | 1.32E-05  | 2.77E-05  |
| Unigene11986  | Potri.007G034200.1 | 7.692   | 19.4318  | -1.337  | Down | 3.48E-35  | 2.42E-34  |
| Unigene18290  | Potri.006G017000.2 | 6.6429  | 16.7815  | -1.337  | Down | 8.51E-27  | 4.71E-26  |
| Unigene12133  | Potri.003G124200.1 | 2.6065  | 6.5846   | -1.337  | Down | 1.32E-05  | 2.77E-05  |
| Unigene18966  | Potri.001G103100.2 | 1.4214  | 3.5908   | -1.337  | Down | 1.32E-05  | 2.77E-05  |
| Unigene74085  | Potri.001G355600.1 | 29.8048 | 75.3003  | -1.3371 | Down | 2.28E-26  | 1.25E-25  |
| Unigene31345  | Potri.008G152800.7 | 8.3329  | 21.0545  | -1.3372 | Down | 1.00E-13  | 3.45E-13  |
| Unigene49648  | Potri.016G001700.3 | 19.4708 | 49.1995  | -1.3373 | Down | 1.16E-37  | 8.58E-37  |
| Unigene84763  | Potri.013G099600.4 | 25.66   | 64.8378  | -1.3373 | Down | 1.04E-29  | 6.28E-29  |
| Unigene19008  | Potri.T081100.2    | 3.4134  | 8.6254   | -1.3374 | Down | 1.79E-09  | 4.94E-09  |
| Unigene39974  | Potri.001G000700.2 | 10.361  | 26.1813  | -1.3374 | Down | 1.60E-17  | 6.49E-17  |
| Unigene85880  | Potri.010G070800.1 | 20.5528 | 51.9401  | -1.3375 | Down | 4.42E-25  | 2.32E-24  |
| Unigene52918  | Potri.004G209800.8 | 8.6076  | 21.7527  | -1.3375 | Down | 2.71E-13  | 9.16E-13  |
| Unigene12203  | Potri.001G301500.1 | 17.6167 | 44.5201  | -1.3375 | Down | 4.42E-25  | 2.32E-24  |
| Unigene31222  | Potri.007G113300.1 | 17.6542 | 44.6184  | -1.3376 | Down | 7.09E-21  | 3.25E-20  |
| Unigene17280  | Potri.008G200100.2 | 2.3312  | 5.8925   | -1.3378 | Down | 3.70E-05  | 7.41E-05  |
| Unigene40871  | Potri.008G094100.4 | 2.449   | 6.1901   | -1.3378 | Down | 3.70E-05  | 7.41E-05  |
| Unigene1722   | Potri.005G083600.2 | 2.2449  | 5.6743   | -1.3378 | Down | 3.70E-05  | 7.41E-05  |
| Unigene103377 | Potri.003G213600.1 | 2.2765  | 5.7542   | -1.3378 | Down | 3.70E-05  | 7.41E-05  |
| Unigene80276  | Potri.001G249600.1 | 3.9263  | 9.9243   | -1.3378 | Down | 3.70E-05  | 7.41E-05  |
| Unigene27765  | Potri.001G036300.1 | 15.4636 | 39.0867  | -1.3378 | Down | 5.40E-28  | 3.09E-27  |
| Unigene10766  | Potri.015G008700.1 | 9.667   | 24.4371  | -1.3379 | Down | 3.83E-127 | 1.10E-125 |
| Unigene32464  | Potri.010G152400.1 | 24.3422 | 61.5315  | -1.3379 | Down | 1.22E-57  | 1.39E-56  |
| Unigene16732  | Potri.003G096700.2 | 87.4529 | 221.0611 | -1.3379 | Down | 1.08E-161 | 4.28E-160 |
| Unigene32674  | Potri.017G016100.1 | 7.8164  | 19.7602  | -1.338  | Down | 1.14E-34  | 7.83E-34  |
| Unigene45313  | Potri.002G110500.1 | 2.0252  | 5.1198   | -1.338  | Down | 5.14E-20  | 2.29E-19  |
| Unigene44931  | Potri.001G114600.1 | 18.8087 | 47.5487  | -1.338  | Down | 4.95E-53  | 5.14E-52  |
| Unigene21472  | Potri.017G084100.1 | 16.8023 | 42.4807  | -1.3381 | Down | 1.00E-91  | 1.92E-90  |
| Unigene11233  | Potri.015G086000.1 | 11.6683 | 29.4999  | -1.3381 | Down | 4.29E-45  | 3.77E-44  |
| Unigene41797  | Potri.005G257400.4 | 17.5059 | 44.2573  | -1.3381 | Down | 3.88E-27  | 2.17E-26  |
| Unigene23965  | Potri.002G180100.2 | 12.9512 | 32.7435  | -1.3381 | Down | 3.05E-34  | 2.08E-33  |

|               |                     |         |          |         |      |           |           |
|---------------|---------------------|---------|----------|---------|------|-----------|-----------|
| Unigene41928  | Potri.001G159600.1  | 30.8983 | 78.1158  | -1.3381 | Down | 5.29E-38  | 3.95E-37  |
| Unigene21933  | Potri.010G173600.1  | 12.2384 | 30.9423  | -1.3382 | Down | 2.94E-59  | 3.45E-58  |
| Unigene53368  | Potri.005G048900.1  | 23.658  | 59.8153  | -1.3382 | Down | 1.41E-37  | 1.05E-36  |
| Unigene50305  | Potri.001G280500.3  | 10.2611 | 25.9429  | -1.3382 | Down | 2.46E-41  | 1.99E-40  |
| Unigene6364   | Potri.015G086600.1  | 5.0488  | 12.766   | -1.3383 | Down | 1.34E-08  | 3.51E-08  |
| Unigene112980 | Potri.015G000800.1  | 54.8258 | 138.6309 | -1.3383 | Down | 1.19E-54  | 1.28E-53  |
| Unigene35429  | Potri.013G062500.4  | 8.8722  | 22.4335  | -1.3383 | Down | 1.34E-08  | 3.51E-08  |
| Unigene45083  | Potri.012G077500.2  | 17.5892 | 44.4768  | -1.3384 | Down | 6.75E-51  | 6.71E-50  |
| Unigene54233  | Potri.015G024400.1  | 8.9032  | 22.5158  | -1.3385 | Down | 2.29E-15  | 8.50E-15  |
| Unigene18808  | Potri.013G115300.2  | 21.5306 | 54.4515  | -1.3386 | Down | 1.57E-32  | 1.02E-31  |
| Unigene11     | Potri.010G210900.2  | 8.9142  | 22.5443  | -1.3386 | Down | 1.99E-97  | 4.11E-96  |
| Unigene115059 | Potri.008G053100.4  | 15.6076 | 39.4727  | -1.3386 | Down | 1.00E-18  | 4.26E-18  |
| Unigene5992   | Potri.003G202900.1  | 8.6849  | 21.964   | -1.3386 | Down | 2.29E-15  | 8.50E-15  |
| Unigene22132  | Potri.010G071200.2  | 14.7374 | 37.2743  | -1.3387 | Down | 1.70E-62  | 2.11E-61  |
| Unigene58535  | Potri.005G099800.1  | 5.76    | 14.5681  | -1.3387 | Down | 2.02E-25  | 1.07E-24  |
| Unigene73505  | Potri.002G215100.2  | 99.1708 | 250.8242 | -1.3387 | Down | 7.29E-83  | 1.24E-81  |
| Unigene112576 | Potri.001G068300.2  | 57.1723 | 144.6009 | -1.3387 | Down | 7.63E-56  | 8.39E-55  |
| Unigene97629  | Potri.018G038900.1  | 1.4946  | 3.7805   | -1.3388 | Down | 1.04E-04  | 2.00E-04  |
| Unigene2092   | Potri.013G068700.1  | 7.8227  | 19.7872  | -1.3388 | Down | 1.47E-11  | 4.55E-11  |
| Unigene20947  | Potri.008G002900.11 | 41.0739 | 103.8915 | -1.3388 | Down | 5.19E-82  | 8.74E-81  |
| Unigene19286  | Potri.002G174300.1  | 2.6478  | 6.6975   | -1.3388 | Down | 1.04E-04  | 2.00E-04  |
| Unigene2913   | Potri.008G030000.1  | 1.9278  | 4.8764   | -1.3389 | Down | 1.04E-04  | 2.00E-04  |
| Unigene25856  | Potri.008G004600.1  | 1.9631  | 4.9657   | -1.3389 | Down | 1.04E-04  | 2.00E-04  |
| Unigene51935  | Potri.002G255900.7  | 1.869   | 4.7277   | -1.3389 | Down | 1.04E-04  | 2.00E-04  |
| Unigene34975  | Potri.019G080300.2  | 13.7189 | 34.7076  | -1.3391 | Down | 4.71E-47  | 4.32E-46  |
| Unigene32925  | Potri.016G043500.1  | 29.6539 | 75.0201  | -1.3391 | Down | 9.02E-122 | 2.48E-120 |
| Unigene18040  | Potri.001G131500.2  | 5.9088  | 14.9487  | -1.3391 | Down | 7.29E-18  | 2.99E-17  |
| Unigene44530  | Potri.011G149300.1  | 28.1345 | 71.1852  | -1.3392 | Down | 5.77E-40  | 4.52E-39  |
| Unigene44418  | Potri.006G096100.1  | 7.1867  | 18.1832  | -1.3392 | Down | 1.00E-33  | 6.72E-33  |
| Unigene35900  | Potri.005G170500.3  | 8.345   | 21.1143  | -1.3392 | Down | 3.99E-11  | 1.21E-10  |
| Unigene33355  | Potri.010G100900.2  | 3.9799  | 10.0712  | -1.3394 | Down | 1.01E-07  | 2.49E-07  |
| Unigene105920 | Potri.008G066900.1  | 3.6618  | 9.2665   | -1.3395 | Down | 1.01E-07  | 2.49E-07  |
| Unigene10006  | Potri.002G203400.1  | 28.9858 | 73.3501  | -1.3395 | Down | 4.13E-39  | 3.17E-38  |
| Unigene7139   | Potri.013G154600.4  | 12.5916 | 31.8666  | -1.3396 | Down | 5.30E-17  | 2.10E-16  |
| Unigene91734  | Potri.008G083800.2  | 47.0522 | 119.0809 | -1.3396 | Down | 2.07E-81  | 3.46E-80  |
| Unigene31890  | Potri.002G141100.2  | 30.7382 | 77.7935  | -1.3396 | Down | 2.21E-139 | 7.20E-138 |
| Unigene51518  | Potri.001G170300.5  | 15.6275 | 39.5499  | -1.3396 | Down | 5.30E-17  | 2.10E-16  |
| Unigene6920   | Potri.002G216600.1  | 7.2527  | 18.3562  | -1.3397 | Down | 1.08E-10  | 3.22E-10  |
| Unigene27678  | Potri.002G010900.1  | 9.4099  | 23.818   | -1.3398 | Down | 1.23E-13  | 4.21E-13  |

|               |                    |         |          |         |      |          |          |
|---------------|--------------------|---------|----------|---------|------|----------|----------|
| Unigene16349  | Potri.010G001300.3 | 15.1915 | 38.4554  | -1.3399 | Down | 1.70E-19 | 7.41E-19 |
| Unigene21668  | Potri.006G216400.1 | 11.6372 | 29.4595  | -1.34   | Down | 6.48E-52 | 6.58E-51 |
| Unigene62989  | Potri.006G007200.1 | 6.0913  | 15.4205  | -1.34   | Down | 5.67E-37 | 4.14E-36 |
| Unigene9985   | Potri.003G119800.1 | 2.6643  | 6.7454   | -1.3401 | Down | 2.94E-04 | 5.37E-04 |
| Unigene30429  | Potri.T036000.1    | 1.9128  | 4.8428   | -1.3402 | Down | 2.94E-04 | 5.37E-04 |
| Unigene26593  | Potri.016G049000.1 | 10.4578 | 26.4772  | -1.3402 | Down | 2.95E-10 | 8.55E-10 |
| Unigene5386   | Potri.016G013500.1 | 3.5023  | 8.8672   | -1.3402 | Down | 2.94E-04 | 5.37E-04 |
| Unigene40665  | Potri.015G081500.1 | 2.2071  | 5.5879   | -1.3402 | Down | 2.94E-04 | 5.37E-04 |
| Unigene38442  | Potri.014G084500.1 | 3.6748  | 9.304    | -1.3402 | Down | 2.77E-07 | 6.66E-07 |
| Unigene49569  | Potri.010G091400.1 | 2.2402  | 5.6718   | -1.3402 | Down | 2.94E-04 | 5.37E-04 |
| Unigene53310  | Potri.003G192900.4 | 16.6304 | 42.1049  | -1.3402 | Down | 5.47E-22 | 2.60E-21 |
| Unigene111219 | Potri.001G264100.1 | 12.9738 | 32.847   | -1.3402 | Down | 3.32E-13 | 1.12E-12 |
| Unigene63625  | Potri.001G166500.1 | 2.1941  | 5.555    | -1.3402 | Down | 2.77E-07 | 6.66E-07 |
| Unigene16067  | Potri.005G094300.1 | 40.4305 | 102.3696 | -1.3403 | Down | 7.87E-45 | 6.87E-44 |
| Unigene31956  | Potri.002G117500.1 | 6.4714  | 16.3859  | -1.3403 | Down | 4.07E-36 | 2.90E-35 |
| Unigene16292  | Potri.001G281300.5 | 47.7945 | 121.014  | -1.3403 | Down | 1.24E-50 | 1.22E-49 |
| Unigene22253  | Potri.012G094800.1 | 9.412   | 23.8338  | -1.3404 | Down | 1.11E-52 | 1.15E-51 |
| Unigene22098  | Potri.009G012300.1 | 15.0484 | 38.1067  | -1.3404 | Down | 1.11E-52 | 1.15E-51 |
| Unigene112176 | Potri.016G139000.8 | 11.9669 | 30.3063  | -1.3406 | Down | 9.01E-13 | 2.97E-12 |
| Unigene116784 | Potri.009G121300.2 | 15.1001 | 38.2427  | -1.3406 | Down | 3.96E-21 | 1.83E-20 |
| Unigene10698  | Potri.009G031500.1 | 6.2424  | 15.8109  | -1.3407 | Down | 1.69E-48 | 1.60E-47 |
| Unigene5805   | Potri.001G257400.1 | 14.269  | 36.1397  | -1.3407 | Down | 3.31E-18 | 1.38E-17 |
| Unigene95089  | Potri.001G251000.1 | 1.3824  | 3.5012   | -1.3407 | Down | 8.05E-10 | 2.27E-09 |
| Unigene16938  | Potri.001G163300.2 | 21.3041 | 53.9565  | -1.3407 | Down | 5.04E-46 | 4.52E-45 |
| Unigene11768  | Potri.018G111100.1 | 6.7039  | 16.9807  | -1.3408 | Down | 5.14E-29 | 3.03E-28 |
| Unigene45644  | Potri.016G109700.3 | 20.8557 | 52.8241  | -1.3408 | Down | 6.32E-32 | 4.05E-31 |
| Unigene42843  | Potri.002G119900.1 | 8.3618  | 21.1796  | -1.3408 | Down | 3.79E-81 | 6.31E-80 |
| Unigene41744  | Potri.004G102000.1 | 19.0683 | 48.3024  | -1.3409 | Down | 1.69E-31 | 1.07E-30 |
| Unigene69791  | Potri.014G102000.1 | 2.6287  | 6.6593   | -1.341  | Down | 2.44E-12 | 7.88E-12 |
| Unigene52426  | Potri.012G022700.1 | 1.4558  | 3.6879   | -1.341  | Down | 7.64E-07 | 1.77E-06 |
| Unigene48364  | Potri.011G121000.2 | 29.1403 | 73.8224  | -1.341  | Down | 1.36E-52 | 1.40E-51 |
| Unigene38225  | Potri.011G017100.1 | 3.5027  | 8.8734   | -1.341  | Down | 7.64E-07 | 1.77E-06 |
| Unigene3521   | Potri.010G024900.2 | 13.847  | 35.0781  | -1.341  | Down | 8.93E-18 | 3.66E-17 |
| Unigene58809  | Potri.006G166000.4 | 6.419   | 16.261   | -1.341  | Down | 7.64E-07 | 1.77E-06 |
| Unigene12852  | Potri.001G351300.1 | 2.4085  | 6.1014   | -1.341  | Down | 7.64E-07 | 1.77E-06 |
| Unigene23411  | Potri.014G060100.2 | 9.6925  | 24.5576  | -1.3412 | Down | 9.28E-23 | 4.52E-22 |
| Unigene33045  | Potri.012G096300.1 | 14.9967 | 37.9954  | -1.3412 | Down | 2.06E-41 | 1.67E-40 |
| Unigene53852  | Potri.012G072200.1 | 16.0013 | 40.5419  | -1.3412 | Down | 9.28E-23 | 4.52E-22 |
| Unigene45888  | Potri.010G055400.1 | 3.3441  | 8.4725   | -1.3412 | Down | 7.61E-15 | 2.75E-14 |

|               |                    |         |          |         |      |          |          |
|---------------|--------------------|---------|----------|---------|------|----------|----------|
| Unigene113041 | Potri.005G023500.1 | 89.8784 | 227.7162 | -1.3412 | Down | 6.78E-89 | 1.25E-87 |
| Unigene255    | Potri.001G402800.1 | 13.1273 | 33.2601  | -1.3412 | Down | 5.89E-65 | 7.63E-64 |
| Unigene54079  | Potri.016G117200.1 | 7.3243  | 18.5583  | -1.3413 | Down | 2.20E-09 | 6.05E-09 |
| Unigene104463 | Potri.014G085400.3 | 3.2777  | 8.3052   | -1.3413 | Down | 2.41E-17 | 9.69E-17 |
| Unigene116304 | Potri.010G185800.3 | 19.1826 | 48.605   | -1.3413 | Down | 3.02E-25 | 1.60E-24 |
| Unigene6353   | Potri.017G146700.2 | 10.0422 | 25.447   | -1.3414 | Down | 3.26E-30 | 1.99E-29 |
| Unigene29436  | Potri.003G133000.1 | 26.1828 | 66.345   | -1.3414 | Down | 8.71E-54 | 9.18E-53 |
| Unigene53568  | Potri.001G138900.1 | 12.3175 | 31.2136  | -1.3415 | Down | 6.63E-12 | 2.10E-11 |
| Unigene34388  | Potri.002G187100.2 | 10.641  | 26.9712  | -1.3418 | Down | 5.02E-57 | 5.65E-56 |
| Unigene34885  | Potri.008G204800.2 | 16.9769 | 43.0333  | -1.3419 | Down | 1.52E-61 | 1.86E-60 |
| Unigene46263  | Potri.014G169100.2 | 12.9407 | 32.8042  | -1.342  | Down | 1.75E-16 | 6.81E-16 |
| Unigene119386 | Potri.009G084700.1 | 1.7396  | 4.4099   | -1.342  | Down | 2.11E-06 | 4.73E-06 |
| Unigene53725  | Potri.008G120100.2 | 7.4308  | 18.8368  | -1.342  | Down | 6.01E-09 | 1.61E-08 |
| Unigene7958   | Potri.008G041100.1 | 4.2499  | 10.7735  | -1.342  | Down | 5.56E-14 | 1.94E-13 |
| Unigene6447   | Potri.006G178100.1 | 4.2844  | 10.8609  | -1.342  | Down | 6.01E-09 | 1.61E-08 |
| Unigene3995   | Potri.005G193300.2 | 16.1405 | 40.9158  | -1.342  | Down | 5.60E-19 | 2.40E-18 |
| Unigene87704  | Potri.001G245000.3 | 53.1519 | 134.746  | -1.342  | Down | 4.17E-68 | 5.69E-67 |
| Unigene45286  | Potri.001G025400.1 | 2.1568  | 5.4674   | -1.342  | Down | 6.01E-09 | 1.61E-08 |
| Unigene50038  | Potri.006G123500.3 | 7.9247  | 20.0926  | -1.3422 | Down | 4.85E-21 | 2.23E-20 |
| Unigene9056   | Potri.008G045600.1 | 15.5808 | 39.507   | -1.3423 | Down | 4.73E-16 | 1.80E-15 |
| Unigene22426  | Potri.006G265200.1 | 2.8391  | 7.1985   | -1.3423 | Down | 1.51E-18 | 6.36E-18 |
| Unigene7796   | Potri.T034200.1    | 6.2711  | 15.9017  | -1.3424 | Down | 5.43E-52 | 5.52E-51 |
| Unigene39457  | Potri.018G097700.1 | 7.3945  | 18.7502  | -1.3424 | Down | 4.52E-28 | 2.60E-27 |
| Unigene29112  | Potri.013G104300.2 | 8.8079  | 22.3339  | -1.3424 | Down | 1.82E-54 | 1.95E-53 |
| Unigene23999  | Potri.017G109700.1 | 12.5108 | 31.7252  | -1.3425 | Down | 1.64E-56 | 1.83E-55 |
| Unigene52902  | Potri.006G195000.2 | 14.8935 | 37.7713  | -1.3426 | Down | 4.06E-18 | 1.69E-17 |
| Unigene18120  | Potri.004G233300.4 | 5.3127  | 13.4746  | -1.3427 | Down | 1.28E-15 | 4.78E-15 |
| Unigene50877  | Potri.008G063400.3 | 8.3841  | 21.2662  | -1.3428 | Down | 3.51E-20 | 1.57E-19 |
| Unigene50345  | Potri.006G127800.1 | 6.0887  | 15.4439  | -1.3428 | Down | 3.51E-20 | 1.57E-19 |
| Unigene27570  | Potri.006G049300.1 | 27.1606 | 68.8889  | -1.3428 | Down | 3.13E-55 | 3.40E-54 |
| Unigene39424  | Potri.011G111500.2 | 3.1448  | 7.977    | -1.3429 | Down | 4.08E-13 | 1.37E-12 |
| Unigene74855  | Potri.002G047100.3 | 78.1922 | 198.3453 | -1.3429 | Down | 2.34E-68 | 3.20E-67 |
| Unigene27762  | Potri.016G057700.1 | 4.981   | 12.6359  | -1.343  | Down | 8.74E-27 | 4.83E-26 |
| Unigene77546  | Potri.006G272300.1 | 17.6851 | 44.8619  | -1.343  | Down | 1.09E-17 | 4.47E-17 |
| Unigene51058  | Potri.018G038800.1 | 2.6766  | 6.7906   | -1.3431 | Down | 5.86E-06 | 1.27E-05 |
| Unigene55029  | Potri.013G116200.1 | 2.4241  | 6.1499   | -1.3431 | Down | 5.86E-06 | 1.27E-05 |
| Unigene33885  | Potri.012G065600.5 | 19.045  | 48.3152  | -1.3431 | Down | 2.21E-40 | 1.75E-39 |
| Unigene27255  | Potri.011G013400.1 | 4.7535  | 12.0597  | -1.3431 | Down | 9.46E-20 | 4.17E-19 |
| Unigene16895  | Potri.004G099100.1 | 16.5184 | 41.9074  | -1.3431 | Down | 9.46E-20 | 4.17E-19 |

|               |                    |         |          |         |      |           |           |
|---------------|--------------------|---------|----------|---------|------|-----------|-----------|
| Unigene978    | Potri.002G077700.1 | 31.6567 | 80.3096  | -1.3431 | Down | 1.61E-83  | 2.77E-82  |
| Unigene20413  | Potri.001G443200.2 | 18.067  | 45.8363  | -1.3431 | Down | 5.36E-56  | 5.91E-55  |
| Unigene49608  | Potri.006G097500.1 | 2.9052  | 7.3707   | -1.3432 | Down | 5.86E-06  | 1.27E-05  |
| Unigene12271  | Potri.011G049700.1 | 11.6357 | 29.5238  | -1.3433 | Down | 6.02E-33  | 3.97E-32  |
| Unigene81883  | Potri.003G085500.1 | 31.0588 | 78.8068  | -1.3433 | Down | 6.02E-33  | 3.97E-32  |
| Unigene29233  | Potri.012G017100.3 | 5.1635  | 13.1023  | -1.3434 | Down | 1.11E-12  | 3.63E-12  |
| Unigene22813  | Potri.004G043200.5 | 46.219  | 117.2796 | -1.3434 | Down | 2.86E-68  | 3.91E-67  |
| Unigene44257  | Potri.017G114400.1 | 11.5088 | 29.2052  | -1.3435 | Down | 6.29E-26  | 3.39E-25  |
| Unigene30925  | Potri.007G135500.2 | 5.5174  | 14.001   | -1.3435 | Down | 2.55E-19  | 1.11E-18  |
| Unigene20588  | Potri.015G079300.1 | 11.7376 | 29.7876  | -1.3436 | Down | 5.54E-28  | 3.17E-27  |
| Unigene89681  | Potri.018G107500.2 | 50.5249 | 128.2364 | -1.3437 | Down | 3.99E-73  | 5.89E-72  |
| Unigene37491  | Potri.011G061200.3 | 12.8876 | 32.7089  | -1.3437 | Down | 7.96E-17  | 3.14E-16  |
| Unigene42245  | Potri.010G057700.1 | 8.8497  | 22.4602  | -1.3437 | Down | 1.93E-23  | 9.60E-23  |
| Unigene20292  | Potri.006G139200.1 | 19.2123 | 48.763   | -1.3438 | Down | 3.84E-34  | 2.60E-33  |
| Unigene2607   | Potri.015G008400.1 | 3.6796  | 9.3403   | -1.3439 | Down | 3.00E-12  | 9.64E-12  |
| Unigene43524  | Potri.014G095300.7 | 17.0492 | 43.2764  | -1.3439 | Down | 1.14E-106 | 2.64E-105 |
| Unigene50143  | Potri.005G136600.1 | 6.2318  | 15.8186  | -1.3439 | Down | 1.16E-31  | 7.37E-31  |
| Unigene92     | Potri.012G048600.1 | 10.0747 | 25.5749  | -1.344  | Down | 3.78E-59  | 4.43E-58  |
| Unigene42962  | Potri.008G045400.3 | 4.3988  | 11.1662  | -1.344  | Down | 3.00E-12  | 9.64E-12  |
| Unigene53354  | Potri.006G126600.1 | 9.0141  | 22.8832  | -1.344  | Down | 2.52E-14  | 8.92E-14  |
| Unigene21716  | Potri.006G025900.1 | 5.0001  | 12.6933  | -1.344  | Down | 3.99E-27  | 2.23E-26  |
| Unigene30745  | Potri.009G013000.3 | 11.9595 | 30.3622  | -1.3441 | Down | 2.15E-16  | 8.32E-16  |
| Unigene63552  | Potri.005G000600.4 | 7.9776  | 20.2526  | -1.3441 | Down | 3.51E-29  | 2.08E-28  |
| Unigene5376   | Potri.004G043700.2 | 93.2081 | 236.6267 | -1.3441 | Down | 2.44E-168 | 1.02E-166 |
| Unigene3161   | Potri.005G135500.1 | 16.0751 | 40.8123  | -1.3442 | Down | 3.34E-54  | 3.55E-53  |
| Unigene97331  | Potri.003G144100.1 | 2.4176  | 6.1394   | -1.3445 | Down | 1.63E-05  | 3.38E-05  |
| Unigene6542   | Potri.012G072400.2 | 3.2739  | 8.3142   | -1.3446 | Down | 1.63E-05  | 3.38E-05  |
| Unigene11462  | Potri.011G102500.1 | 5.288   | 13.429   | -1.3446 | Down | 9.89E-10  | 2.78E-09  |
| Unigene101394 | Potri.010G240300.2 | 3.7658  | 9.5633   | -1.3446 | Down | 1.24E-07  | 3.05E-07  |
| Unigene39537  | Potri.019G065300.1 | 7.8717  | 19.9947  | -1.3449 | Down | 8.85E-40  | 6.91E-39  |
| Unigene10761  | Potri.014G176500.1 | 17.3375 | 44.0409  | -1.3449 | Down | 3.30E-129 | 9.72E-128 |
| Unigene48519  | Potri.013G118000.6 | 16.6625 | 42.3262  | -1.3449 | Down | 1.34E-17  | 5.46E-17  |
| Unigene8781   | Potri.011G105400.1 | 9.9648  | 25.3127  | -1.3449 | Down | 1.34E-17  | 5.45E-17  |
| Unigene89625  | Potri.006G241600.2 | 12.744  | 32.3714  | -1.3449 | Down | 1.16E-19  | 5.10E-19  |
| Unigene36638  | Potri.003G204900.2 | 10.2636 | 26.0709  | -1.3449 | Down | 1.16E-19  | 5.10E-19  |
| Unigene14154  | Potri.003G000500.4 | 18.5646 | 47.158   | -1.3449 | Down | 1.34E-17  | 5.46E-17  |
| Unigene1766   | Potri.001G175200.2 | 17.9533 | 45.6044  | -1.3449 | Down | 1.12E-35  | 7.88E-35  |
| Unigene102402 | Potri.001G316800.1 | 3.0364  | 7.7134   | -1.345  | Down | 1.57E-15  | 5.84E-15  |
| Unigene25028  | Potri.017G047600.1 | 10.6758 | 27.1215  | -1.3451 | Down | 2.07E-25  | 1.10E-24  |

|               |                    |         |          |         |      |          |          |
|---------------|--------------------|---------|----------|---------|------|----------|----------|
| Unigene42391  | Potri.010G210100.1 | 8.7978  | 22.35    | -1.3451 | Down | 3.25E-51 | 3.25E-50 |
| Unigene25589  | Potri.010G077100.1 | 27.3418 | 69.4604  | -1.3451 | Down | 2.07E-25 | 1.10E-24 |
| Unigene34047  | Potri.007G065200.1 | 10.1291 | 25.7333  | -1.3451 | Down | 2.36E-23 | 1.17E-22 |
| Unigene20707  | Potri.006G229900.3 | 23.9932 | 60.9551  | -1.3451 | Down | 2.99E-35 | 2.08E-34 |
| Unigene12384  | Potri.015G085300.2 | 14.5616 | 36.9972  | -1.3452 | Down | 4.30E-29 | 2.55E-28 |
| Unigene13911  | Potri.006G139500.1 | 10.1795 | 25.8626  | -1.3452 | Down | 5.65E-41 | 4.54E-40 |
| Unigene73318  | Potri.002G104800.1 | 11.9003 | 30.2346  | -1.3452 | Down | 2.21E-11 | 6.81E-11 |
| Unigene24734  | Potri.009G070700.1 | 15.5415 | 39.4875  | -1.3453 | Down | 3.12E-19 | 1.35E-18 |
| Unigene14259  | Potri.005G172400.1 | 31.0232 | 78.8248  | -1.3453 | Down | 4.88E-27 | 2.72E-26 |
| Unigene52082  | Potri.002G018700.2 | 51.4248 | 130.6614 | -1.3453 | Down | 5.76E-70 | 8.10E-69 |
| Unigene1831   | Potri.013G005200.2 | 5.7135  | 14.5178  | -1.3454 | Down | 3.62E-17 | 1.45E-16 |
| Unigene43028  | Potri.008G126900.2 | 6.0751  | 15.4364  | -1.3454 | Down | 2.23E-81 | 3.72E-80 |
| Unigene38270  | Potri.001G319000.3 | 23.6752 | 60.1575  | -1.3454 | Down | 9.02E-33 | 5.92E-32 |
| Unigene13517  | Potri.010G147900.1 | 28.8521 | 73.3204  | -1.3455 | Down | 8.93E-73 | 1.31E-71 |
| Unigene1105   | Potri.002G241200.2 | 13.2761 | 33.7374  | -1.3455 | Down | 6.92E-48 | 6.47E-47 |
| Unigene8108   | Potri.015G041700.1 | 5.8304  | 14.8178  | -1.3457 | Down | 5.01E-13 | 1.67E-12 |
| Unigene110586 | Potri.014G032100.1 | 19.3958 | 49.2939  | -1.3457 | Down | 8.40E-19 | 3.58E-18 |
| Unigene86142  | Potri.006G211500.3 | 9.763   | 24.8123  | -1.3457 | Down | 5.01E-13 | 1.67E-12 |
| Unigene13426  | Potri.010G019600.5 | 18.5363 | 47.1137  | -1.3458 | Down | 1.22E-37 | 9.02E-37 |
| Unigene52871  | Potri.014G130600.1 | 5.953   | 15.1321  | -1.3459 | Down | 6.01E-11 | 1.81E-10 |
| Unigene18124  | Potri.006G148400.1 | 2.9147  | 7.409    | -1.3459 | Down | 6.01E-11 | 1.81E-10 |
| Unigene6437   | Potri.014G047200.3 | 14.7213 | 37.423   | -1.346  | Down | 8.30E-28 | 4.73E-27 |
| Unigene43140  | Potri.010G003700.3 | 3.8556  | 9.8013   | -1.346  | Down | 1.14E-14 | 4.11E-14 |
| Unigene32962  | Potri.004G032300.2 | 3.4111  | 8.6712   | -1.346  | Down | 4.01E-24 | 2.04E-23 |
| Unigene52603  | Potri.012G079800.1 | 12.3609 | 31.4239  | -1.3461 | Down | 2.26E-18 | 9.48E-18 |
| Unigene15379  | Potri.010G002400.2 | 28.8587 | 73.3657  | -1.3461 | Down | 7.76E-39 | 5.91E-38 |
| Unigene33154  | Potri.006G203700.8 | 8.6956  | 22.106   | -1.3461 | Down | 2.26E-18 | 9.48E-18 |
| Unigene24367  | Potri.017G057800.1 | 7.9243  | 20.147   | -1.3462 | Down | 8.46E-48 | 7.90E-47 |
| Unigene8702   | Potri.018G068600.1 | 1.8687  | 4.7514   | -1.3463 | Down | 4.57E-05 | 9.09E-05 |
| Unigene15565  | Potri.008G035100.1 | 4.3574  | 11.0791  | -1.3463 | Down | 4.57E-05 | 9.09E-05 |
| Unigene45294  | Potri.007G134200.1 | 9.9554  | 25.3124  | -1.3463 | Down | 9.41E-57 | 1.05E-55 |
| Unigene106733 | Potri.006G025900.1 | 5.9143  | 15.0376  | -1.3463 | Down | 1.36E-12 | 4.43E-12 |
| Unigene17205  | Potri.005G147200.1 | 2.48    | 6.3057   | -1.3463 | Down | 4.57E-05 | 9.09E-05 |
| Unigene6743   | Potri.002G174300.1 | 2.3371  | 5.9422   | -1.3463 | Down | 4.57E-05 | 9.09E-05 |
| Unigene22056  | Potri.016G045400.3 | 8.5545  | 21.7527  | -1.3464 | Down | 2.53E-25 | 1.34E-24 |
| Unigene86918  | Potri.003G104400.2 | 37.6629 | 95.766   | -1.3464 | Down | 2.26E-47 | 2.09E-46 |
| Unigene11419  | Potri.014G091400.1 | 9.298   | 23.6438  | -1.3465 | Down | 2.83E-65 | 3.69E-64 |
| Unigene34025  | Potri.012G120000.1 | 6.9119  | 17.5768  | -1.3465 | Down | 6.10E-18 | 2.51E-17 |
| Unigene37105  | Potri.001G362300.3 | 36.1594 | 91.9522  | -1.3465 | Down | 2.62E-34 | 1.79E-33 |



|               |                    |         |          |         |      |          |          |
|---------------|--------------------|---------|----------|---------|------|----------|----------|
| Unigene94494  | Potri.001G349900.1 | 5.0957  | 12.9585  | -1.3465 | Down | 1.25E-30 | 7.71E-30 |
| Unigene31346  | Potri.017G063100.1 | 13.0397 | 33.161   | -1.3466 | Down | 3.09E-14 | 1.09E-13 |
| Unigene49528  | Potri.010G001900.3 | 17.2791 | 43.9442  | -1.3466 | Down | 2.96E-32 | 1.91E-31 |
| Unigene11750  | Potri.007G096900.2 | 9.2506  | 23.5274  | -1.3467 | Down | 7.56E-43 | 6.33E-42 |
| Unigene14506  | Potri.005G130800.1 | 26.2279 | 66.7051  | -1.3467 | Down | 1.49E-37 | 1.10E-36 |
| Unigene61093  | Potri.008G072100.1 | 9.5463  | 24.2808  | -1.3468 | Down | 7.11E-16 | 2.69E-15 |
| Unigene29894  | Potri.002G254500.1 | 12.9679 | 32.9836  | -1.3468 | Down | 7.11E-16 | 2.69E-15 |
| Unigene49146  | Potri.002G163000.1 | 10.2786 | 26.1432  | -1.3468 | Down | 7.11E-16 | 2.69E-15 |
| Unigene53319  | Potri.001G448900.1 | 18.1893 | 46.2626  | -1.3468 | Down | 6.80E-25 | 3.55E-24 |
| Unigene23314  | Potri.018G048600.1 | 2.9255  | 7.4417   | -1.3469 | Down | 9.41E-07 | 2.17E-06 |
| Unigene18560  | Potri.001G206600.1 | 10.2398 | 26.0467  | -1.3469 | Down | 2.02E-42 | 1.68E-41 |
| Unigene85605  | Potri.T064300.1    | 9.2288  | 23.4759  | -1.347  | Down | 3.68E-12 | 1.18E-11 |
| Unigene16851  | Potri.013G067700.1 | 1.788   | 4.5483   | -1.347  | Down | 9.41E-07 | 2.17E-06 |
| Unigene44798  | Potri.013G022200.1 | 1.7237  | 4.3848   | -1.347  | Down | 9.41E-07 | 2.17E-06 |
| Unigene29945  | Potri.010G226100.5 | 8.5528  | 21.7563  | -1.347  | Down | 1.64E-17 | 6.66E-17 |
| Unigene88673  | Potri.007G096900.2 | 3.9727  | 10.1057  | -1.347  | Down | 9.41E-07 | 2.17E-06 |
| Unigene106734 | Potri.007G032800.1 | 1.3509  | 3.4364   | -1.347  | Down | 3.68E-12 | 1.18E-11 |
| Unigene15438  | Potri.001G295100.1 | 12.7884 | 32.5309  | -1.347  | Down | 3.68E-12 | 1.18E-11 |
| Unigene18723  | Potri.001G171800.1 | 5.2147  | 13.265   | -1.347  | Down | 3.68E-12 | 1.18E-11 |
| Unigene38724  | Potri.001G054700.2 | 2.5773  | 6.5561   | -1.347  | Down | 9.41E-07 | 2.17E-06 |
| Unigene44247  | Potri.001G369000.1 | 28.6981 | 73.0089  | -1.3471 | Down | 3.42E-54 | 3.63E-53 |
| Unigene44079  | Potri.010G162800.1 | 37.471  | 95.3359  | -1.3472 | Down | 5.93E-66 | 7.83E-65 |
| Unigene20748  | Potri.003G195400.1 | 10.3541 | 26.3421  | -1.3472 | Down | 8.37E-14 | 2.90E-13 |
| Unigene67743  | Potri.014G131600.3 | 2.4519  | 6.2385   | -1.3473 | Down | 2.02E-08 | 5.26E-08 |
| Unigene13222  | Potri.001G121100.1 | 13.2208 | 33.6392  | -1.3473 | Down | 2.85E-36 | 2.04E-35 |
| Unigene42465  | Potri.014G024200.2 | 6.02    | 15.318   | -1.3474 | Down | 5.69E-31 | 3.55E-30 |
| Unigene76576  | Potri.008G051700.3 | 80.8431 | 205.7058 | -1.3474 | Down | 4.81E-74 | 7.19E-73 |
| Unigene593    | Potri.006G190500.4 | 5.9333  | 15.0976  | -1.3474 | Down | 5.69E-31 | 3.55E-30 |
| Unigene24939  | Potri.011G166900.3 | 6.8313  | 17.3835  | -1.3475 | Down | 1.15E-25 | 6.16E-25 |
| Unigene25494  | Potri.007G139100.2 | 16.8088 | 42.7722  | -1.3475 | Down | 4.43E-17 | 1.77E-16 |
| Unigene19309  | Potri.003G019600.1 | 25.762  | 65.5564  | -1.3475 | Down | 1.15E-25 | 6.16E-25 |
| Unigene62835  | Potri.001G336500.3 | 3.1173  | 7.9328   | -1.3475 | Down | 4.46E-10 | 1.28E-09 |
| Unigene22587  | Potri.010G001500.4 | 20.1557 | 51.2923  | -1.3476 | Down | 2.73E-27 | 1.53E-26 |
| Unigene33729  | Potri.009G068600.3 | 7.8428  | 19.9595  | -1.3476 | Down | 2.40E-20 | 1.08E-19 |
| Unigene117918 | Potri.008G025800.6 | 22.0752 | 56.1773  | -1.3476 | Down | 7.64E-36 | 5.42E-35 |
| Unigene12552  | Potri.006G154800.1 | 8.5005  | 21.6321  | -1.3476 | Down | 1.03E-18 | 4.37E-18 |
| Unigene66969  | Potri.001G171400.1 | 5.3682  | 13.661   | -1.3476 | Down | 4.46E-10 | 1.28E-09 |
| Unigene12394  | Potri.001G089800.2 | 29.3013 | 74.5705  | -1.3476 | Down | 9.02E-58 | 1.03E-56 |
| Unigene10825  | Potri.011G108800.1 | 2.712   | 6.9022   | -1.3477 | Down | 9.99E-12 | 3.13E-11 |

|              |                    |         |         |         |      |          |          |
|--------------|--------------------|---------|---------|---------|------|----------|----------|
| Unigene23534 | Potri.001G166400.2 | 5.8894  | 14.989  | -1.3477 | Down | 5.61E-22 | 2.66E-21 |
| Unigene64127 | Potri.019G044200.2 | 11.3459 | 28.8783 | -1.3478 | Down | 2.27E-13 | 7.69E-13 |
| Unigene26320 | Potri.002G237500.1 | 17.8702 | 45.4829 | -1.3478 | Down | 1.32E-23 | 6.60E-23 |
| Unigene10843 | Potri.013G161700.5 | 4.2901  | 10.9204 | -1.3479 | Down | 4.09E-30 | 2.49E-29 |
| Unigene20850 | Potri.007G087200.4 | 12.5816 | 32.0282 | -1.348  | Down | 2.77E-18 | 1.16E-17 |
| Unigene54117 | Potri.005G196100.1 | 27.4697 | 69.9252 | -1.348  | Down | 9.70E-32 | 6.18E-31 |
| Unigene5719  | Potri.016G046600.1 | 21.9722 | 55.9348 | -1.3481 | Down | 3.11E-38 | 2.34E-37 |
| Unigene87077 | Potri.010G206400.2 | 16.1911 | 41.2189 | -1.3481 | Down | 1.51E-21 | 7.07E-21 |
| Unigene26065 | Potri.002G018600.1 | 5.1121  | 13.0143 | -1.3481 | Down | 1.51E-21 | 7.07E-21 |
| Unigene54187 | Potri.001G286900.1 | 63.4323 | 161.485 | -1.3481 | Down | 8.23E-83 | 1.40E-81 |
| Unigene31824 | Potri.017G129300.4 | 19.7632 | 50.3148 | -1.3482 | Down | 9.51E-96 | 1.92E-94 |
| Unigene92705 | Potri.017G101000.1 | 12.6083 | 32.0997 | -1.3482 | Down | 1.96E-26 | 1.07E-25 |
| Unigene44978 | Potri.004G014100.2 | 16.4773 | 41.9496 | -1.3482 | Down | 2.69E-74 | 4.04E-73 |
| Unigene7147  | Potri.001G012200.2 | 15.2589 | 38.8504 | -1.3483 | Down | 3.49E-36 | 2.50E-35 |
| Unigene34278 | Potri.015G050900.1 | 2.5579  | 6.5138  | -1.3485 | Down | 1.22E-09 | 3.40E-09 |
| Unigene3494  | Potri.014G022400.1 | 1.492   | 3.7993  | -1.3485 | Down | 1.29E-04 | 2.44E-04 |
| Unigene18664 | Potri.010G217600.1 | 1.7203  | 4.3808  | -1.3485 | Down | 1.29E-04 | 2.44E-04 |
| Unigene49943 | Potri.010G162500.4 | 4.6361  | 11.8058 | -1.3485 | Down | 5.55E-08 | 1.40E-07 |
| Unigene89333 | Potri.010G062300.1 | 2.3246  | 5.9196  | -1.3485 | Down | 1.29E-04 | 2.44E-04 |
| Unigene51967 | Potri.008G168100.3 | 4.7472  | 12.0888 | -1.3485 | Down | 6.14E-13 | 2.04E-12 |
| Unigene3988  | Potri.008G053000.2 | 25.968  | 66.1276 | -1.3485 | Down | 5.27E-26 | 2.84E-25 |
| Unigene17891 | Potri.005G067700.2 | 2.3924  | 6.0922  | -1.3485 | Down | 1.29E-04 | 2.44E-04 |
| Unigene32955 | Potri.004G226900.1 | 1.7096  | 4.3534  | -1.3485 | Down | 2.61E-06 | 5.79E-06 |
| Unigene29794 | Potri.004G084800.3 | 2.0618  | 5.2503  | -1.3485 | Down | 1.29E-04 | 2.44E-04 |
| Unigene38209 | Potri.003G136800.1 | 3.3088  | 8.4259  | -1.3485 | Down | 2.61E-06 | 5.79E-06 |
| Unigene41338 | Potri.002G182600.2 | 6.1931  | 15.7708 | -1.3485 | Down | 5.55E-08 | 1.40E-07 |
| Unigene32083 | Potri.004G206100.1 | 7.8646  | 20.0309 | -1.3488 | Down | 4.43E-32 | 2.85E-31 |
| Unigene49600 | Potri.008G191700.2 | 10.4002 | 26.4904 | -1.3489 | Down | 1.41E-25 | 7.53E-25 |
| Unigene51142 | Potri.002G002400.1 | 18.6498 | 47.5071 | -1.349  | Down | 4.68E-19 | 2.01E-18 |
| Unigene12208 | Potri.001G471400.1 | 6.0197  | 15.3346 | -1.349  | Down | 2.01E-17 | 8.13E-17 |
| Unigene85492 | Potri.010G180400.5 | 12.3474 | 31.4553 | -1.3491 | Down | 8.72E-16 | 3.28E-15 |
| Unigene34971 | Potri.006G220900.5 | 9.4687  | 24.1224 | -1.3491 | Down | 2.11E-28 | 1.23E-27 |
| Unigene36488 | Potri.004G153500.2 | 10.0583 | 25.6237 | -1.3491 | Down | 8.72E-16 | 3.28E-15 |
| Unigene8038  | Potri.006G259600.3 | 6.1206  | 15.5931 | -1.3492 | Down | 3.79E-14 | 1.33E-13 |
| Unigene39625 | Potri.002G159900.2 | 4.6831  | 11.9309 | -1.3492 | Down | 3.79E-14 | 1.33E-13 |
| Unigene34518 | Potri.010G076200.3 | 3.433   | 8.7468  | -1.3493 | Down | 1.66E-12 | 5.42E-12 |
| Unigene49014 | Potri.012G134300.5 | 5.0753  | 12.9322 | -1.3494 | Down | 7.38E-11 | 2.21E-10 |
| Unigene17121 | Potri.007G142400.1 | 24.652  | 62.8183 | -1.3495 | Down | 1.14E-35 | 8.07E-35 |
| Unigene9363  | Potri.002G152100.1 | 16.1866 | 41.2467 | -1.3495 | Down | 1.26E-18 | 5.33E-18 |

|               |                    |         |          |         |      |           |           |
|---------------|--------------------|---------|----------|---------|------|-----------|-----------|
| Unigene19388  | Potri.004G228800.2 | 6.2973  | 16.048   | -1.3496 | Down | 3.32E-09  | 9.04E-09  |
| Unigene93001  | Potri.015G074100.1 | 10.3214 | 26.3044  | -1.3497 | Down | 4.33E-23  | 2.13E-22  |
| Unigene16219  | Potri.007G011100.2 | 27.2423 | 69.4299  | -1.3497 | Down | 6.32E-43  | 5.30E-42  |
| Unigene10719  | Potri.005G102200.1 | 14.6197 | 37.2603  | -1.3497 | Down | 1.35E-129 | 4.00E-128 |
| Unigene40701  | Potri.016G104700.1 | 16.8667 | 42.9888  | -1.3498 | Down | 1.52E-27  | 8.60E-27  |
| Unigene70395  | Potri.007G040000.2 | 2.9739  | 7.5805   | -1.3499 | Down | 2.74E-24  | 1.40E-23  |
| Unigene82631  | Potri.006G266400.1 | 5.8148  | 14.8212  | -1.3499 | Down | 1.52E-07  | 3.73E-07  |
| Unigene2825   | Potri.005G247200.1 | 2.7654  | 7.0488   | -1.3499 | Down | 1.03E-13  | 3.54E-13  |
| Unigene6916   | Potri.008G142500.1 | 36.1154 | 92.0645  | -1.35   | Down | 8.39E-56  | 9.23E-55  |
| Unigene30063  | Potri.007G047500.1 | 18.2012 | 46.3994  | -1.3501 | Down | 1.16E-22  | 5.65E-22  |
| Unigene21278  | Potri.007G034900.2 | 5.3754  | 13.7032  | -1.3501 | Down | 1.15E-64  | 1.49E-63  |
| Unigene2668   | Potri.002G151000.1 | 7.3772  | 18.8079  | -1.3502 | Down | 5.22E-36  | 3.72E-35  |
| Unigene32286  | Potri.007G019400.2 | 17.8192 | 45.4321  | -1.3503 | Down | 1.78E-71  | 2.56E-70  |
| Unigene45168  | Potri.002G042800.1 | 4.5876  | 11.6964  | -1.3503 | Down | 1.73E-25  | 9.18E-25  |
| Unigene38725  | Potri.017G081900.1 | 4.2847  | 10.9254  | -1.3504 | Down | 6.78E-49  | 6.47E-48  |
| Unigene3550   | Potri.016G014500.1 | 7.7171  | 19.6769  | -1.3504 | Down | 2.01E-10  | 5.87E-10  |
| Unigene6358   | Potri.010G060800.1 | 30.365  | 77.4273  | -1.3504 | Down | 1.85E-44  | 1.60E-43  |
| Unigene26427  | Potri.006G239900.2 | 34.8473 | 88.8524  | -1.3504 | Down | 1.21E-41  | 9.86E-41  |
| Unigene46430  | Potri.006G146600.2 | 10.1726 | 25.9377  | -1.3504 | Down | 2.01E-10  | 5.87E-10  |
| Unigene27930  | Potri.005G129800.1 | 2.7975  | 7.1329   | -1.3504 | Down | 7.24E-06  | 1.55E-05  |
| Unigene23063  | Potri.003G148000.2 | 2.256   | 5.7523   | -1.3504 | Down | 7.24E-06  | 1.55E-05  |
| Unigene12447  | Potri.019G053700.1 | 14.7274 | 37.554   | -1.3505 | Down | 3.89E-31  | 2.44E-30  |
| Unigene2770   | Potri.009G095700.2 | 3.6661  | 9.3488   | -1.3505 | Down | 9.16E-18  | 3.75E-17  |
| Unigene50336  | Potri.009G079900.1 | 5.7289  | 14.6088  | -1.3505 | Down | 3.13E-22  | 1.50E-21  |
| Unigene43104  | Potri.006G150400.1 | 13.3032 | 33.9261  | -1.3506 | Down | 1.81E-48  | 1.72E-47  |
| Unigene5644   | Potri.002G004600.1 | 11.9783 | 30.5473  | -1.3506 | Down | 2.78E-13  | 9.39E-13  |
| Unigene111039 | Potri.001G456300.1 | 17.7539 | 45.2742  | -1.3506 | Down | 9.16E-18  | 3.75E-17  |
| Unigene9400   | Potri.017G014800.2 | 21.3508 | 54.4579  | -1.3509 | Down | 2.94E-26  | 1.60E-25  |
| Unigene20648  | Potri.004G197400.1 | 72.382  | 184.6271 | -1.3509 | Down | 8.09E-84  | 1.40E-82  |
| Unigene24339  | Potri.016G053700.2 | 3.2897  | 8.3915   | -1.351  | Down | 1.23E-11  | 3.82E-11  |
| Unigene43189  | Potri.010G215700.1 | 9.8309  | 25.0768  | -1.351  | Down | 8.42E-22  | 3.97E-21  |
| Unigene72593  | Potri.001G153400.3 | 12.253  | 31.2552  | -1.351  | Down | 1.23E-11  | 3.82E-11  |
| Unigene53334  | Potri.014G000500.5 | 18.9216 | 48.2691  | -1.3511 | Down | 1.86E-27  | 1.05E-26  |
| Unigene29032  | Potri.010G204400.1 | 6.2461  | 15.9344  | -1.3511 | Down | 2.47E-17  | 9.93E-17  |
| Unigene3750   | Potri.010G110700.1 | 18.9175 | 48.2607  | -1.3511 | Down | 2.47E-17  | 9.93E-17  |
| Unigene8173   | Potri.010G035400.1 | 10.0208 | 25.5656  | -1.3512 | Down | 5.30E-23  | 2.61E-22  |
| Unigene10880  | Potri.007G107300.2 | 6.6551  | 16.9801  | -1.3513 | Down | 6.20E-40  | 4.85E-39  |
| Unigene7432   | Potri.019G082200.1 | 6.0278  | 15.3807  | -1.3514 | Down | 2.26E-21  | 1.05E-20  |
| Unigene15289  | Potri.015G137600.3 | 33.1164 | 84.5016  | -1.3514 | Down | 7.49E-30  | 4.53E-29  |

|               |                    |         |          |         |      |           |           |
|---------------|--------------------|---------|----------|---------|------|-----------|-----------|
| Unigene68713  | Potri.015G135300.3 | 1.9907  | 5.0796   | -1.3514 | Down | 3.65E-04  | 6.60E-04  |
| Unigene6219   | Potri.015G091000.1 | 5.3893  | 13.7516  | -1.3514 | Down | 4.20E-07  | 9.96E-07  |
| Unigene25817  | Potri.013G023100.1 | 15.7487 | 40.1852  | -1.3514 | Down | 2.26E-21  | 1.05E-20  |
| Unigene42652  | Potri.010G158700.6 | 7.7506  | 19.7767  | -1.3514 | Down | 9.25E-47  | 8.44E-46  |
| Unigene51527  | Potri.009G140100.3 | 3.0029  | 7.6624   | -1.3514 | Down | 3.65E-04  | 6.60E-04  |
| Unigene6432   | Potri.008G097200.1 | 1.9206  | 4.9006   | -1.3514 | Down | 3.65E-04  | 6.60E-04  |
| Unigene86031  | Potri.002G234100.1 | 2.3862  | 6.0887   | -1.3514 | Down | 3.65E-04  | 6.60E-04  |
| Unigene49022  | Potri.001G044000.4 | 9.5511  | 24.3711  | -1.3514 | Down | 1.07E-15  | 4.01E-15  |
| Unigene17706  | Potri.009G057300.7 | 1.2543  | 3.2006   | -1.3515 | Down | 3.65E-04  | 6.60E-04  |
| Unigene35222  | Potri.006G151500.1 | 1.6217  | 4.1381   | -1.3515 | Down | 3.65E-04  | 6.60E-04  |
| Unigene102711 | Potri.006G150100.3 | 1.3576  | 3.4642   | -1.3515 | Down | 3.65E-04  | 6.60E-04  |
| Unigene31658  | Potri.001G258000.1 | 23.7766 | 60.6781  | -1.3516 | Down | 2.12E-25  | 1.12E-24  |
| Unigene79675  | Potri.010G019100.1 | 18.7265 | 47.7923  | -1.3517 | Down | 9.69E-20  | 4.27E-19  |
| Unigene42571  | Potri.002G194600.1 | 23.6348 | 60.3199  | -1.3517 | Down | 1.39E-180 | 6.36E-179 |
| Unigene22354  | Potri.002G021700.1 | 6.1661  | 15.7365  | -1.3517 | Down | 9.69E-20  | 4.27E-19  |
| Unigene22087  | Potri.002G009700.1 | 4.283   | 10.9311  | -1.3517 | Down | 6.66E-17  | 2.63E-16  |
| Unigene49740  | Potri.017G070200.3 | 21.3297 | 54.4445  | -1.3519 | Down | 1.28E-30  | 7.88E-30  |
| Unigene7666   | Potri.001G096700.1 | 7.3149  | 18.6726  | -1.352  | Down | 1.23E-34  | 8.41E-34  |
| Unigene14563  | Potri.012G086500.1 | 7.09    | 18.0999  | -1.3521 | Down | 2.49E-08  | 6.42E-08  |
| Unigene46304  | Potri.005G120800.2 | 13.6675 | 34.89    | -1.3521 | Down | 8.11E-32  | 5.18E-31  |
| Unigene19885  | Potri.002G139000.1 | 22.8771 | 58.4025  | -1.3521 | Down | 3.83E-22  | 1.83E-21  |
| Unigene20531  | Potri.002G110900.3 | 14.3795 | 36.7113  | -1.3522 | Down | 3.60E-26  | 1.95E-25  |
| Unigene15624  | Potri.005G223500.1 | 8.9864  | 22.944   | -1.3523 | Down | 2.04E-12  | 6.62E-12  |
| Unigene68771  | Potri.003G206000.2 | 6.8755  | 17.5556  | -1.3524 | Down | 2.17E-31  | 1.37E-30  |
| Unigene23865  | Potri.019G050500.4 | 11.4636 | 29.2725  | -1.3525 | Down | 1.90E-51  | 1.91E-50  |
| Unigene15579  | Potri.001G230000.1 | 38.3235 | 97.8628  | -1.3525 | Down | 1.29E-40  | 1.03E-39  |
| Unigene108699 | Potri.017G101700.1 | 9.6372  | 24.611   | -1.3526 | Down | 1.49E-09  | 4.15E-09  |
| Unigene1823   | Potri.016G128600.1 | 2.0022  | 5.113    | -1.3526 | Down | 2.02E-05  | 4.14E-05  |
| Unigene32299  | Potri.009G151400.7 | 1.2684  | 3.2391   | -1.3526 | Down | 2.02E-05  | 4.14E-05  |
| Unigene39217  | Potri.009G026600.1 | 3.0198  | 7.7117   | -1.3526 | Down | 1.49E-09  | 4.15E-09  |
| Unigene52798  | Potri.014G035000.1 | 19.0857 | 48.7441  | -1.3527 | Down | 5.82E-31  | 3.63E-30  |
| Unigene45513  | Potri.003G127200.1 | 6.7186  | 17.1598  | -1.3528 | Down | 3.57E-36  | 2.55E-35  |
| Unigene36802  | Potri.013G005100.1 | 10.6059 | 27.0897  | -1.3529 | Down | 7.80E-15  | 2.82E-14  |
| Unigene45681  | Potri.009G044600.1 | 40.1636 | 102.5866 | -1.3529 | Down | 1.90E-178 | 8.57E-177 |
| Unigene33126  | Potri.006G254900.5 | 5.4066  | 13.8096  | -1.3529 | Down | 7.80E-15  | 2.82E-14  |
| Unigene108772 | Potri.012G015500.1 | 11.0122 | 28.1296  | -1.353  | Down | 9.06E-11  | 2.70E-10  |
| Unigene1035   | Potri.002G234400.1 | 25.1086 | 64.1397  | -1.353  | Down | 1.61E-114 | 4.09E-113 |
| Unigene19153  | Potri.002G078800.1 | 5.7958  | 14.8067  | -1.3532 | Down | 9.92E-32  | 6.32E-31  |
| Unigene22057  | Potri.008G070300.3 | 1.4441  | 3.6896   | -1.3533 | Down | 1.16E-06  | 2.65E-06  |

|               |                    |          |          |         |      |           |           |
|---------------|--------------------|----------|----------|---------|------|-----------|-----------|
| Unigene114626 | Potri.006G221700.2 | 9.564    | 24.435   | -1.3533 | Down | 5.54E-12  | 1.76E-11  |
| Unigene79126  | Potri.006G160500.3 | 27.1976  | 69.4869  | -1.3533 | Down | 1.04E-27  | 5.90E-27  |
| Unigene33245  | Potri.006G015100.1 | 17.7695  | 45.401   | -1.3533 | Down | 9.69E-50  | 9.41E-49  |
| Unigene80608  | Potri.015G063900.1 | 104.4088 | 266.7717 | -1.3534 | Down | 3.02E-105 | 6.85E-104 |
| Unigene44021  | Potri.009G094900.1 | 15.9511  | 40.7563  | -1.3534 | Down | 6.21E-51  | 6.18E-50  |
| Unigene43917  | Potri.005G200000.2 | 5.758    | 14.7126  | -1.3534 | Down | 1.89E-18  | 7.95E-18  |
| Unigene34656  | Potri.005G168000.1 | 2.6837   | 6.8571   | -1.3534 | Down | 1.10E-23  | 5.53E-23  |
| Unigene70833  | Potri.012G057100.1 | 14.4745  | 36.9864  | -1.3535 | Down | 3.41E-13  | 1.15E-12  |
| Unigene27614  | Potri.002G068100.1 | 27.8737  | 71.2308  | -1.3536 | Down | 2.74E-63  | 3.46E-62  |
| Unigene47795  | Potri.014G060300.4 | 5.6277   | 14.3821  | -1.3537 | Down | 6.82E-08  | 1.71E-07  |
| Unigene117637 | Potri.013G065700.1 | 8.5769   | 21.9192  | -1.3537 | Down | 2.11E-14  | 7.49E-14  |
| Unigene49277  | Potri.019G021500.1 | 2.3485   | 6.003    | -1.3539 | Down | 4.08E-09  | 1.11E-08  |
| Unigene8627   | Potri.010G167100.1 | 20.291   | 51.8657  | -1.3539 | Down | 4.53E-32  | 2.91E-31  |
| Unigene22565  | Potri.003G124700.1 | 7.7819   | 19.8902  | -1.3539 | Down | 2.96E-23  | 1.46E-22  |
| Unigene45600  | Potri.012G061400.1 | 2.6868   | 6.8678   | -1.354  | Down | 4.08E-09  | 1.11E-08  |
| Unigene30344  | Potri.008G113200.3 | 1.9273   | 4.9265   | -1.354  | Down | 4.08E-09  | 1.11E-08  |
| Unigene6415   | Potri.007G078400.1 | 23.4644  | 59.9797  | -1.354  | Down | 2.88E-33  | 1.91E-32  |
| Unigene50397  | Potri.005G257800.3 | 8.0293   | 20.5251  | -1.354  | Down | 5.10E-18  | 2.11E-17  |
| Unigene8678   | Potri.005G254100.2 | 6.2989   | 16.1007  | -1.354  | Down | 4.08E-09  | 1.11E-08  |
| Unigene24430  | Potri.001G214700.5 | 2.741    | 7.0064   | -1.354  | Down | 4.08E-09  | 1.11E-08  |
| Unigene78271  | Potri.009G146200.1 | 9.3249   | 23.8387  | -1.3541 | Down | 2.47E-10  | 7.17E-10  |
| Unigene26665  | Potri.008G118900.1 | 28.9562  | 74.0254  | -1.3541 | Down | 2.00E-54  | 2.13E-53  |
| Unigene2099   | Potri.014G070600.1 | 5.0015   | 12.7862  | -1.3542 | Down | 2.47E-10  | 7.17E-10  |
| Unigene21439  | Potri.018G138500.2 | 3.7354   | 9.5505   | -1.3543 | Down | 7.90E-43  | 6.61E-42  |
| Unigene37     | Potri.017G072600.1 | 8.3549   | 21.3611  | -1.3543 | Down | 5.81E-150 | 2.08E-148 |
| Unigene50696  | Potri.009G159900.2 | 4.5603   | 11.6596  | -1.3543 | Down | 1.50E-11  | 4.67E-11  |
| Unigene45650  | Potri.009G123800.1 | 10.3804  | 26.5393  | -1.3543 | Down | 2.03E-50  | 2.00E-49  |
| Unigene47163  | Potri.002G123000.2 | 5.8246   | 14.8915  | -1.3543 | Down | 1.93E-40  | 1.53E-39  |
| Unigene1073   | Potri.007G042400.1 | 5.8396   | 14.931   | -1.3544 | Down | 5.05E-44  | 4.33E-43  |
| Unigene28476  | Potri.006G270700.1 | 5.3184   | 13.5988  | -1.3544 | Down | 9.24E-13  | 3.04E-12  |
| Unigene15847  | Potri.T052400.1    | 5.9194   | 15.1367  | -1.3545 | Down | 5.70E-14  | 1.99E-13  |
| Unigene26565  | Potri.015G071800.2 | 31.7639  | 81.2224  | -1.3545 | Down | 1.27E-37  | 9.42E-37  |
| Unigene21800  | Potri.009G003900.2 | 7.6749   | 19.6253  | -1.3545 | Down | 2.39E-62  | 2.96E-61  |
| Unigene29336  | Potri.001G319300.1 | 6.9104   | 17.6707  | -1.3545 | Down | 5.70E-14  | 1.99E-13  |
| Unigene12107  | Potri.013G114200.1 | 8.4199   | 21.5338  | -1.3547 | Down | 1.37E-17  | 5.58E-17  |
| Unigene42539  | Potri.002G089100.2 | 12.7789  | 32.6829  | -1.3548 | Down | 3.81E-53  | 3.96E-52  |
| Unigene52538  | Potri.018G113600.2 | 21.8653  | 55.9318  | -1.355  | Down | 1.37E-29  | 8.23E-29  |
| Unigene47340  | Potri.006G026900.4 | 19.0217  | 48.6573  | -1.355  | Down | 2.16E-28  | 1.25E-27  |
| Unigene11804  | Potri.006G197200.1 | 19.9966  | 51.1538  | -1.3551 | Down | 4.97E-67  | 6.67E-66  |

|               |                    |         |          |         |      |           |           |
|---------------|--------------------|---------|----------|---------|------|-----------|-----------|
| Unigene91548  | Potri.014G032100.1 | 55.5991 | 142.2519 | -1.3553 | Down | 2.17E-96  | 4.43E-95  |
| Unigene21333  | Potri.004G229700.4 | 18.4605 | 47.2301  | -1.3553 | Down | 1.57E-132 | 4.81E-131 |
| Unigene32413  | Potri.T109100.1    | 10.3453 | 26.4709  | -1.3554 | Down | 6.33E-40  | 4.95E-39  |
| Unigene72256  | Potri.018G139800.3 | 7.2426  | 18.532   | -1.3554 | Down | 1.88E-07  | 4.56E-07  |
| Unigene22211  | Potri.013G087100.1 | 5.2762  | 13.5003  | -1.3554 | Down | 3.62E-23  | 1.79E-22  |
| Unigene34183  | Potri.012G075900.1 | 2.1314  | 5.4537   | -1.3554 | Down | 1.12E-08  | 2.94E-08  |
| Unigene9402   | Potri.009G060700.2 | 2.9486  | 7.5447   | -1.3554 | Down | 1.88E-07  | 4.56E-07  |
| Unigene107205 | Potri.008G054500.1 | 8.5701  | 21.9287  | -1.3554 | Down | 5.80E-28  | 3.32E-27  |
| Unigene32825  | Potri.007G022600.1 | 4.3597  | 11.1553  | -1.3554 | Down | 3.62E-23  | 1.79E-22  |
| Unigene47139  | Potri.006G244300.2 | 6.6409  | 16.9923  | -1.3554 | Down | 1.45E-19  | 6.36E-19  |
| Unigene29043  | Potri.005G196200.1 | 2.5873  | 6.6201   | -1.3554 | Down | 1.12E-08  | 2.94E-08  |
| Unigene107690 | Potri.005G160700.1 | 25.1126 | 64.2565  | -1.3554 | Down | 5.74E-22  | 2.72E-21  |
| Unigene69960  | Potri.005G065800.1 | 1.9128  | 4.8944   | -1.3554 | Down | 5.66E-05  | 1.11E-04  |
| Unigene4437   | Potri.005G020400.1 | 3.3909  | 8.6764   | -1.3554 | Down | 5.66E-05  | 1.11E-04  |
| Unigene35957  | Potri.004G064600.2 | 1.4864  | 3.8033   | -1.3554 | Down | 3.21E-06  | 7.10E-06  |
| Unigene22884  | Potri.003G203000.1 | 4.2094  | 10.7706  | -1.3554 | Down | 2.50E-12  | 8.08E-12  |
| Unigene11485  | Potri.003G060100.2 | 10.5586 | 27.0168  | -1.3554 | Down | 3.68E-29  | 2.18E-28  |
| Unigene100352 | Potri.001G214800.1 | 2.3422  | 5.9931   | -1.3554 | Down | 1.88E-07  | 4.56E-07  |
| Unigene37256  | Potri.001G139300.1 | 3.5003  | 8.9562   | -1.3554 | Down | 3.21E-06  | 7.10E-06  |
| Unigene38001  | Potri.001G059700.2 | 7.7843  | 19.9179  | -1.3554 | Down | 1.12E-08  | 2.94E-08  |
| Unigene37082  | Potri.001G089900.2 | 1.487   | 3.8049   | -1.3555 | Down | 5.66E-05  | 1.11E-04  |
| Unigene69831  | Potri.015G058600.1 | 65.8124 | 168.456  | -1.3559 | Down | 5.64E-225 | 3.37E-223 |
| Unigene34101  | Potri.002G263000.4 | 11.6899 | 29.9205  | -1.3559 | Down | 1.55E-27  | 8.79E-27  |
| Unigene90778  | Potri.001G398800.2 | 16.3777 | 41.9191  | -1.3559 | Down | 1.55E-27  | 8.79E-27  |
| Unigene28227  | Potri.014G189900.6 | 11.458  | 29.3291  | -1.356  | Down | 9.72E-23  | 4.73E-22  |
| Unigene2857   | Potri.014G108200.2 | 5.6437  | 14.4466  | -1.356  | Down | 1.54E-21  | 7.23E-21  |
| Unigene12855  | Potri.006G045200.5 | 25.4584 | 65.1681  | -1.356  | Down | 2.89E-40  | 2.28E-39  |
| Unigene47136  | Potri.002G241900.1 | 16.7113 | 42.7778  | -1.356  | Down | 2.45E-20  | 1.10E-19  |
| Unigene89712  | Potri.015G048800.2 | 11.2311 | 28.7513  | -1.3561 | Down | 6.24E-18  | 2.57E-17  |
| Unigene29312  | Potri.008G165100.4 | 10.3906 | 26.5988  | -1.3561 | Down | 3.91E-19  | 1.69E-18  |
| Unigene82627  | Potri.017G032200.1 | 14.3242 | 36.6709  | -1.3562 | Down | 9.99E-17  | 3.92E-16  |
| Unigene35922  | Potri.010G096500.1 | 7.2308  | 18.5114  | -1.3562 | Down | 9.99E-17  | 3.92E-16  |
| Unigene28142  | Potri.009G073300.2 | 7.1523  | 18.3112  | -1.3562 | Down | 1.60E-15  | 5.97E-15  |
| Unigene8765   | Potri.008G027400.1 | 14.6986 | 37.6311  | -1.3562 | Down | 1.60E-15  | 5.97E-15  |
| Unigene1320   | Potri.004G017200.1 | 55.7782 | 142.7988 | -1.3562 | Down | 8.98E-75  | 1.36E-73  |
| Unigene67132  | Potri.016G075200.4 | 9.0844  | 23.2591  | -1.3563 | Down | 2.58E-14  | 9.13E-14  |
| Unigene11463  | Potri.008G159900.1 | 17.2769 | 44.2356  | -1.3564 | Down | 7.47E-63  | 9.33E-62  |
| Unigene32826  | Potri.006G250200.2 | 13.2966 | 34.0458  | -1.3564 | Down | 1.04E-24  | 5.40E-24  |
| Unigene18840  | Potri.013G005800.1 | 3.7138  | 9.5099   | -1.3565 | Down | 6.80E-12  | 2.15E-11  |

|               |                    |         |          |         |      |          |          |
|---------------|--------------------|---------|----------|---------|------|----------|----------|
| Unigene30995  | Potri.008G093400.1 | 5.5229  | 14.1424  | -1.3565 | Down | 6.80E-12 | 2.15E-11 |
| Unigene30020  | Potri.006G080200.1 | 5.1166  | 13.1021  | -1.3565 | Down | 6.80E-12 | 2.15E-11 |
| Unigene31295  | Potri.010G152300.3 | 25.107  | 64.2963  | -1.3566 | Down | 1.54E-48 | 1.46E-47 |
| Unigene73051  | Potri.006G087700.1 | 97.0859 | 248.6099 | -1.3566 | Down | 5.01E-83 | 8.54E-82 |
| Unigene21875  | Potri.004G001500.2 | 6.9819  | 17.8794  | -1.3566 | Down | 1.32E-40 | 1.05E-39 |
| Unigene32739  | Potri.002G001700.1 | 2.3764  | 6.0853   | -1.3566 | Down | 6.80E-12 | 2.15E-11 |
| Unigene17331  | Potri.011G089700.2 | 4.2135  | 10.7905  | -1.3567 | Down | 1.11E-10 | 3.30E-10 |
| Unigene40003  | Potri.003G032300.3 | 8.1992  | 20.9977  | -1.3567 | Down | 6.60E-20 | 2.93E-19 |
| Unigene45673  | Potri.014G146400.1 | 12.6464 | 32.392   | -1.3569 | Down | 3.53E-40 | 2.78E-39 |
| Unigene53032  | Potri.010G098200.2 | 19.4766 | 49.8851  | -1.3569 | Down | 1.68E-17 | 6.81E-17 |
| Unigene7459   | Potri.007G062700.1 | 9.3404  | 23.9245  | -1.3569 | Down | 2.80E-24 | 1.43E-23 |
| Unigene30597  | Potri.005G176600.1 | 8.9048  | 22.8078  | -1.3569 | Down | 1.83E-09 | 5.07E-09 |
| Unigene28767  | Potri.005G111600.2 | 2.8363  | 7.2645   | -1.3569 | Down | 1.83E-09 | 5.07E-09 |
| Unigene49034  | Potri.005G092700.2 | 11.1751 | 28.624   | -1.3569 | Down | 2.80E-24 | 1.43E-23 |
| Unigene39422  | Potri.003G034900.7 | 3.273   | 8.383    | -1.3569 | Down | 1.83E-09 | 5.07E-09 |
| Unigene43322  | Potri.002G194700.1 | 3.887   | 9.9562   | -1.3569 | Down | 2.80E-24 | 1.43E-23 |
| Unigene53420  | Potri.004G196400.4 | 14.6801 | 37.603   | -1.357  | Down | 2.70E-16 | 1.04E-15 |
| Unigene111827 | Potri.014G103600.1 | 21.3366 | 54.6587  | -1.3571 | Down | 7.03E-22 | 3.33E-21 |
| Unigene56629  | Potri.011G095800.2 | 3.0352  | 7.7754   | -1.3571 | Down | 3.06E-08 | 7.85E-08 |
| Unigene81990  | Potri.007G025800.1 | 13.0115 | 33.3319  | -1.3571 | Down | 4.33E-15 | 1.58E-14 |
| Unigene5044   | Potri.006G015100.1 | 13.1131 | 33.5923  | -1.3571 | Down | 4.33E-15 | 1.58E-14 |
| Unigene39916  | Potri.005G137400.6 | 4.124   | 10.5647  | -1.3571 | Down | 3.06E-08 | 7.85E-08 |
| Unigene50650  | Potri.004G004900.1 | 14.4697 | 37.0674  | -1.3571 | Down | 1.21E-28 | 7.03E-28 |
| Unigene11638  | Potri.003G142100.2 | 5.3243  | 13.6394  | -1.3571 | Down | 1.21E-28 | 7.04E-28 |
| Unigene8505   | Potri.006G155500.1 | 34.6922 | 88.8756  | -1.3572 | Down | 2.08E-73 | 3.09E-72 |
| Unigene17494  | Potri.005G094300.1 | 14.993  | 38.4123  | -1.3573 | Down | 3.00E-26 | 1.63E-25 |
| Unigene49912  | Potri.005G092700.2 | 10.2982 | 26.3842  | -1.3573 | Down | 3.00E-26 | 1.63E-25 |
| Unigene7718   | Potri.010G053700.1 | 5.0973  | 13.0611  | -1.3575 | Down | 7.51E-24 | 3.79E-23 |
| Unigene40128  | Potri.001G273400.1 | 4.585   | 11.7485  | -1.3575 | Down | 2.84E-18 | 1.18E-17 |
| Unigene23156  | Potri.006G224500.4 | 49.7645 | 127.5265 | -1.3576 | Down | 4.81E-80 | 7.90E-79 |
| Unigene8523   | Potri.005G197900.1 | 6.1766  | 15.8286  | -1.3576 | Down | 4.54E-17 | 1.81E-16 |
| Unigene49555  | Potri.T015900.2    | 3.7413  | 9.5883   | -1.3577 | Down | 1.85E-11 | 5.70E-11 |
| Unigene6851   | Potri.019G128900.1 | 7.415   | 19.0032  | -1.3577 | Down | 1.85E-11 | 5.70E-11 |
| Unigene35582  | Potri.010G098700.1 | 8.4597  | 21.6807  | -1.3577 | Down | 1.85E-11 | 5.70E-11 |
| Unigene50902  | Potri.002G124000.1 | 20.2893 | 51.9979  | -1.3577 | Down | 2.22E-31 | 1.40E-30 |
| Unigene42785  | Potri.014G191700.1 | 3.6493  | 9.3531   | -1.3578 | Down | 7.27E-16 | 2.75E-15 |
| Unigene43141  | Potri.010G148600.1 | 5.6071  | 14.3706  | -1.3578 | Down | 8.06E-26 | 4.32E-25 |
| Unigene40035  | Potri.005G027200.2 | 12.696  | 32.539   | -1.3578 | Down | 8.06E-26 | 4.32E-25 |
| Unigene9569   | Potri.008G168400.1 | 4.2844  | 10.9815  | -1.3579 | Down | 1.27E-24 | 6.59E-24 |

|               |                    |         |          |         |      |           |           |
|---------------|--------------------|---------|----------|---------|------|-----------|-----------|
| Unigene3314   | Potri.008G004300.1 | 12.3    | 31.5263  | -1.3579 | Down | 3.01E-43  | 2.55E-42  |
| Unigene92543  | Potri.001G188300.1 | 60.5732 | 155.261  | -1.3579 | Down | 2.03E-119 | 5.42E-118 |
| Unigene114372 | Potri.015G074100.2 | 8.0723  | 20.6924  | -1.358  | Down | 3.03E-10  | 8.76E-10  |
| Unigene1444   | Potri.012G144200.1 | 24.5926 | 63.0366  | -1.358  | Down | 5.32E-78  | 8.47E-77  |
| Unigene90767  | Potri.011G082000.1 | 52.2953 | 134.0529 | -1.358  | Down | 2.69E-84  | 4.68E-83  |
| Unigene95139  | Potri.001G360700.1 | 3.2386  | 8.3017   | -1.358  | Down | 8.93E-06  | 1.89E-05  |
| Unigene85092  | Potri.001G037300.3 | 31.4101 | 80.5114  | -1.358  | Down | 1.06E-37  | 7.87E-37  |
| Unigene119284 | Potri.009G137000.1 | 1.6389  | 4.2012   | -1.3581 | Down | 8.93E-06  | 1.89E-05  |
| Unigene43713  | Potri.008G181200.1 | 2.0643  | 5.2916   | -1.3581 | Down | 8.93E-06  | 1.89E-05  |
| Unigene32519  | Potri.003G185600.2 | 30.7072 | 78.7144  | -1.3581 | Down | 2.46E-136 | 7.78E-135 |
| Unigene28336  | Potri.001G180600.2 | 2.8316  | 7.2586   | -1.3581 | Down | 8.93E-06  | 1.89E-05  |
| Unigene4337   | Potri.001G006300.2 | 3.8494  | 9.8675   | -1.3581 | Down | 8.93E-06  | 1.89E-05  |
| Unigene2544   | Potri.006G019000.1 | 5.1912  | 13.3088  | -1.3582 | Down | 7.64E-18  | 3.14E-17  |
| Unigene350    | Potri.004G068700.1 | 3.0916  | 7.926    | -1.3582 | Down | 7.64E-18  | 3.14E-17  |
| Unigene11361  | Potri.004G014100.1 | 7.1571  | 18.3497  | -1.3583 | Down | 1.23E-84  | 2.16E-83  |
| Unigene5787   | Potri.006G275200.1 | 15.7759 | 40.4487  | -1.3584 | Down | 5.08E-21  | 2.34E-20  |
| Unigene22195  | Potri.005G010200.1 | 4.8553  | 12.4489  | -1.3584 | Down | 1.97E-40  | 1.56E-39  |
| Unigene25377  | Potri.010G164300.5 | 8.5159  | 21.8358  | -1.3585 | Down | 5.01E-09  | 1.35E-08  |
| Unigene35729  | Potri.008G076300.1 | 19.1538 | 49.1153  | -1.3585 | Down | 2.33E-27  | 1.31E-26  |
| Unigene78976  | Potri.006G136400.8 | 15.5415 | 39.8503  | -1.3585 | Down | 1.22E-16  | 4.78E-16  |
| Unigene72919  | Potri.017G152600.1 | 12.6711 | 32.4943  | -1.3586 | Down | 3.07E-12  | 9.86E-12  |
| Unigene75013  | Potri.010G206400.1 | 12.148  | 31.1528  | -1.3586 | Down | 3.07E-12  | 9.86E-12  |
| Unigene110052 | Potri.016G019800.3 | 15.598  | 40.0025  | -1.3587 | Down | 1.96E-15  | 7.29E-15  |
| Unigene20604  | Potri.005G021400.1 | 18.3127 | 46.9634  | -1.3587 | Down | 3.67E-26  | 1.99E-25  |
| Unigene43852  | Potri.001G101400.1 | 32.037  | 82.1608  | -1.3587 | Down | 8.13E-54  | 8.58E-53  |
| Unigene499    | Potri.005G247200.1 | 5.6148  | 14.3999  | -1.3588 | Down | 2.57E-46  | 2.33E-45  |
| Unigene79248  | Potri.005G145400.1 | 73.98   | 189.7542 | -1.3589 | Down | 1.74E-73  | 2.58E-72  |
| Unigene29777  | Potri.003G190300.2 | 2.701   | 6.9285   | -1.359  | Down | 1.60E-04  | 2.99E-04  |
| Unigene58695  | Potri.008G171700.2 | 4.5146  | 11.5808  | -1.3591 | Down | 3.17E-14  | 1.12E-13  |
| Unigene7237   | Potri.001G460100.3 | 6.072   | 15.5757  | -1.3591 | Down | 5.02E-11  | 1.52E-10  |
| Unigene6625   | Potri.017G082200.1 | 16.8586 | 43.2502  | -1.3592 | Down | 9.85E-26  | 5.27E-25  |
| Unigene10872  | Potri.001G195900.1 | 11.8722 | 30.4574  | -1.3592 | Down | 4.01E-80  | 6.60E-79  |
| Unigene53786  | Potri.004G217600.1 | 18.0022 | 46.1851  | -1.3593 | Down | 1.46E-22  | 7.04E-22  |
| Unigene44737  | Potri.001G344000.1 | 18.7038 | 47.9893  | -1.3594 | Down | 1.06E-27  | 6.02E-27  |
| Unigene26929  | Potri.008G130000.1 | 20.7925 | 53.3523  | -1.3595 | Down | 2.31E-21  | 1.08E-20  |
| Unigene50440  | Potri.017G014100.1 | 3.1272  | 8.0248   | -1.3596 | Down | 8.25E-10  | 2.33E-09  |
| Unigene35672  | Potri.001G199100.1 | 4.4118  | 11.321   | -1.3596 | Down | 8.25E-10  | 2.33E-09  |
| Unigene21188  | Potri.016G128400.1 | 6.1253  | 15.72    | -1.3597 | Down | 3.68E-20  | 1.65E-19  |
| Unigene42575  | Potri.014G154600.4 | 10.0847 | 25.8797  | -1.3597 | Down | 6.89E-110 | 1.66E-108 |



|               |                    |         |          |         |      |           |           |
|---------------|--------------------|---------|----------|---------|------|-----------|-----------|
| Unigene45254  | Potri.001G377400.2 | 62.0161 | 159.15   | -1.3597 | Down | 8.91E-147 | 3.11E-145 |
| Unigene2997   | Potri.013G123500.1 | 37.2995 | 95.7278  | -1.3598 | Down | 5.89E-49  | 5.62E-48  |
| Unigene11584  | Potri.008G182000.1 | 5.0587  | 12.9833  | -1.3598 | Down | 1.46E-35  | 1.02E-34  |
| Unigene85423  | Potri.019G109700.1 | 86.7311 | 222.6177 | -1.3599 | Down | 9.59E-103 | 2.12E-101 |
| Unigene34290  | Potri.006G237900.2 | 4.684   | 12.0222  | -1.3599 | Down | 3.91E-22  | 1.87E-21  |
| Unigene60281  | Potri.006G024100.2 | 6.3409  | 16.275   | -1.3599 | Down | 1.43E-06  | 3.25E-06  |
| Unigene29263  | Potri.003G117800.1 | 2.4915  | 6.3949   | -1.3599 | Down | 1.43E-06  | 3.25E-06  |
| Unigene33023  | Potri.001G216000.1 | 3.355   | 8.6111   | -1.3599 | Down | 8.33E-12  | 2.62E-11  |
| Unigene85973  | Potri.006G221100.1 | 39.1897 | 100.5988 | -1.3601 | Down | 1.57E-48  | 1.49E-47  |
| Unigene43922  | Potri.003G086400.1 | 45.5307 | 116.8806 | -1.3601 | Down | 4.54E-94  | 8.96E-93  |
| Unigene7717   | Potri.007G070100.1 | 8.3286  | 21.3806  | -1.3602 | Down | 3.59E-33  | 2.38E-32  |
| Unigene42306  | Potri.019G060900.1 | 2.5297  | 6.4946   | -1.3603 | Down | 1.37E-08  | 3.60E-08  |
| Unigene118267 | Potri.008G205300.1 | 4.1444  | 10.6401  | -1.3603 | Down | 1.37E-08  | 3.60E-08  |
| Unigene16247  | Potri.007G126700.1 | 21.9201 | 56.2783  | -1.3603 | Down | 4.62E-39  | 3.54E-38  |
| Unigene49191  | Potri.006G108900.1 | 2.5481  | 6.5418   | -1.3603 | Down | 1.37E-08  | 3.60E-08  |
| Unigene43560  | Potri.018G006900.1 | 5.265   | 13.5178  | -1.3604 | Down | 7.10E-25  | 3.70E-24  |
| Unigene52182  | Potri.010G245100.4 | 8.145   | 20.9127  | -1.3604 | Down | 9.35E-18  | 3.83E-17  |
| Unigene2864   | Potri.005G215900.1 | 10.4919 | 26.9395  | -1.3604 | Down | 6.65E-36  | 4.72E-35  |
| Unigene10881  | Potri.005G201300.2 | 21.7847 | 55.9353  | -1.3604 | Down | 3.46E-104 | 7.76E-103 |
| Unigene33338  | Potri.018G093900.1 | 10.2829 | 26.404   | -1.3605 | Down | 6.69E-58  | 7.66E-57  |
| Unigene53727  | Potri.012G088200.1 | 34.9683 | 89.7888  | -1.3605 | Down | 7.24E-38  | 5.40E-37  |
| Unigene89355  | Potri.009G067200.2 | 12.6439 | 32.466   | -1.3605 | Down | 9.89E-20  | 4.36E-19  |
| Unigene29444  | Potri.003G068700.1 | 4.503   | 11.5623  | -1.3605 | Down | 1.36E-10  | 4.03E-10  |
| Unigene38049  | Potri.001G324400.2 | 7.5607  | 19.4138  | -1.3605 | Down | 1.36E-10  | 4.03E-10  |
| Unigene42897  | Potri.002G009700.1 | 8.3652  | 21.4815  | -1.3606 | Down | 1.03E-45  | 9.16E-45  |
| Unigene74191  | Potri.001G171100.1 | 12.7237 | 32.674   | -1.3606 | Down | 1.39E-12  | 4.54E-12  |
| Unigene116342 | Potri.018G123300.1 | 10.1511 | 26.0695  | -1.3607 | Down | 1.43E-14  | 5.13E-14  |
| Unigene19395  | Potri.008G107900.1 | 16.0547 | 41.229   | -1.3607 | Down | 1.13E-36  | 8.21E-36  |
| Unigene15025  | Potri.006G136900.2 | 9.1826  | 23.5812  | -1.3607 | Down | 2.28E-130 | 6.80E-129 |
| Unigene28178  | Potri.018G096900.2 | 3.4065  | 8.7488   | -1.3608 | Down | 1.50E-16  | 5.84E-16  |
| Unigene32341  | Potri.002G099100.1 | 10.5204 | 27.0191  | -1.3608 | Down | 1.51E-31  | 9.59E-31  |
| Unigene32081  | Potri.010G019200.1 | 3.5948  | 9.233    | -1.3609 | Down | 1.67E-20  | 7.57E-20  |
| Unigene44183  | Potri.005G152500.5 | 15.034  | 38.6133  | -1.3609 | Down | 1.94E-37  | 1.43E-36  |
| Unigene14447  | Potri.013G107300.1 | 11.8709 | 30.4923  | -1.361  | Down | 2.38E-30  | 1.46E-29  |
| Unigene94164  | Potri.007G142400.1 | 8.5408  | 21.9381  | -1.361  | Down | 2.20E-28  | 1.28E-27  |
| Unigene51208  | Potri.006G056900.1 | 57.1005 | 146.6843 | -1.3611 | Down | 8.18E-58  | 9.34E-57  |
| Unigene50459  | Potri.T034800.4    | 1.7893  | 4.5968   | -1.3612 | Down | 2.49E-05  | 5.08E-05  |
| Unigene117444 | Potri.010G194400.3 | 2.679   | 6.8825   | -1.3612 | Down | 2.49E-05  | 5.08E-05  |
| Unigene18116  | Potri.019G058300.1 | 29.5326 | 75.8723  | -1.3613 | Down | 1.35E-146 | 4.70E-145 |

|              |                    |          |          |         |      |           |           |
|--------------|--------------------|----------|----------|---------|------|-----------|-----------|
| Unigene90775 | Potri.018G072600.2 | 54.624   | 140.3422 | -1.3613 | Down | 1.05E-88  | 1.93E-87  |
| Unigene45234 | Potri.016G086300.1 | 5.5227   | 14.1884  | -1.3613 | Down | 2.83E-21  | 1.31E-20  |
| Unigene53629 | Potri.015G056000.1 | 21.361   | 54.8785  | -1.3613 | Down | 2.83E-21  | 1.31E-20  |
| Unigene48668 | Potri.014G141100.1 | 9.6979   | 24.9148  | -1.3613 | Down | 2.32E-13  | 7.86E-13  |
| Unigene43168 | Potri.007G001800.1 | 2.103    | 5.4028   | -1.3613 | Down | 2.41E-15  | 8.89E-15  |
| Unigene18645 | Potri.003G175800.1 | 2.6716   | 6.8636   | -1.3613 | Down | 2.25E-09  | 6.20E-09  |
| Unigene37670 | Potri.002G248800.2 | 9.1489   | 23.5046  | -1.3613 | Down | 2.41E-15  | 8.89E-15  |
| Unigene30057 | Potri.010G005800.2 | 10.5494  | 27.1058  | -1.3614 | Down | 9.63E-40  | 7.51E-39  |
| Unigene83501 | Potri.006G130500.2 | 38.4047  | 98.677   | -1.3614 | Down | 1.15E-43  | 9.78E-43  |
| Unigene10770 | Potri.006G011300.1 | 6.8063   | 17.4883  | -1.3614 | Down | 9.63E-40  | 7.51E-39  |
| Unigene1240  | Potri.017G126600.1 | 4.0743   | 10.4688  | -1.3615 | Down | 7.48E-34  | 5.04E-33  |
| Unigene35085 | Potri.010G063600.1 | 7.3945   | 18.9998  | -1.3615 | Down | 8.13E-36  | 5.76E-35  |
| Unigene68191 | Potri.010G184100.1 | 5.7895   | 14.8777  | -1.3616 | Down | 4.50E-20  | 2.01E-19  |
| Unigene65041 | Potri.009G013000.3 | 5.1993   | 13.3603  | -1.3616 | Down | 5.49E-26  | 2.96E-25  |
| Unigene42508 | Potri.014G194600.1 | 6.9927   | 17.9712  | -1.3618 | Down | 3.36E-72  | 4.89E-71  |
| Unigene37077 | Potri.002G051300.2 | 12.3341  | 31.6999  | -1.3618 | Down | 3.88E-14  | 1.36E-13  |
| Unigene22879 | Potri.010G019900.1 | 8.8341   | 22.7053  | -1.3619 | Down | 8.68E-25  | 4.51E-24  |
| Unigene49934 | Potri.004G135900.1 | 13.3983  | 34.4357  | -1.3619 | Down | 2.37E-37  | 1.74E-36  |
| Unigene1313  | Potri.002G232800.4 | 6.1362   | 15.7719  | -1.3619 | Down | 8.11E-23  | 3.95E-22  |
| Unigene28604 | Potri.018G028200.1 | 16.5631  | 42.5738  | -1.362  | Down | 4.40E-40  | 3.46E-39  |
| Unigene49829 | Potri.014G181000.1 | 23.5441  | 60.5191  | -1.362  | Down | 2.67E-57  | 3.01E-56  |
| Unigene36767 | Potri.008G193900.1 | 18.5766  | 47.7495  | -1.362  | Down | 7.60E-21  | 3.48E-20  |
| Unigene6576  | Potri.016G043500.1 | 15.6713  | 40.2839  | -1.3621 | Down | 1.58E-27  | 8.95E-27  |
| Unigene4892  | Potri.002G123100.1 | 24.9717  | 64.1942  | -1.3621 | Down | 1.47E-25  | 7.84E-25  |
| Unigene50063 | Potri.017G028800.2 | 3.237    | 8.3224   | -1.3623 | Down | 3.76E-08  | 9.60E-08  |
| Unigene25781 | Potri.010G169100.2 | 14.9954  | 38.5561  | -1.3624 | Down | 1.21E-19  | 5.32E-19  |
| Unigene89175 | Potri.008G153000.3 | 162.0233 | 416.5905 | -1.3624 | Down | 2.45E-230 | 1.50E-228 |
| Unigene21860 | Potri.017G077200.1 | 40.9746  | 105.3553 | -1.3625 | Down | 4.07E-148 | 1.44E-146 |
| Unigene14130 | Potri.011G142400.1 | 16.1237  | 41.4591  | -1.3625 | Down | 2.33E-24  | 1.20E-23  |
| Unigene19219 | Potri.008G182300.1 | 46.8073  | 120.3586 | -1.3625 | Down | 2.01E-40  | 1.59E-39  |
| Unigene8007  | Potri.011G156400.1 | 15.752   | 40.5054  | -1.3626 | Down | 9.15E-34  | 6.14E-33  |
| Unigene21450 | Potri.010G019600.1 | 5.1024   | 13.1209  | -1.3626 | Down | 3.75E-43  | 3.16E-42  |
| Unigene23331 | Potri.006G225500.1 | 2.4976   | 6.4226   | -1.3626 | Down | 2.18E-22  | 1.05E-21  |
| Unigene32201 | Potri.011G048000.1 | 14.0277  | 36.075   | -1.3627 | Down | 5.53E-74  | 8.27E-73  |
| Unigene38630 | Potri.004G129900.1 | 2.8202   | 7.2529   | -1.3628 | Down | 3.96E-06  | 8.69E-06  |
| Unigene22895 | Potri.004G121200.3 | 5.2678   | 13.5476  | -1.3628 | Down | 2.05E-20  | 9.23E-20  |
| Unigene37686 | Potri.001G129700.1 | 5.5061   | 14.1605  | -1.3628 | Down | 3.96E-06  | 8.69E-06  |
| Unigene9465  | Potri.010G232800.1 | 12.3304  | 31.7164  | -1.363  | Down | 1.05E-13  | 3.61E-13  |
| Unigene50200 | Potri.005G011100.1 | 6.8008   | 17.4943  | -1.3631 | Down | 4.53E-36  | 3.23E-35  |

|               |                    |         |          |         |      |           |           |
|---------------|--------------------|---------|----------|---------|------|-----------|-----------|
| Unigene39806  | Potri.004G140100.1 | 2.7198  | 6.9965   | -1.3631 | Down | 6.16E-09  | 1.65E-08  |
| Unigene55992  | Potri.016G026100.3 | 3.2463  | 8.3511   | -1.3632 | Down | 6.16E-09  | 1.65E-08  |
| Unigene2724   | Potri.009G119500.1 | 14.8299 | 38.1517  | -1.3632 | Down | 1.14E-26  | 6.28E-26  |
| Unigene335    | Potri.001G275000.1 | 4.2242  | 10.8667  | -1.3632 | Down | 6.26E-24  | 3.17E-23  |
| Unigene20704  | Potri.014G081700.1 | 7.5729  | 19.4837  | -1.3633 | Down | 1.02E-11  | 3.20E-11  |
| Unigene29276  | Potri.010G149500.2 | 19.4955 | 50.1596  | -1.3634 | Down | 7.12E-35  | 4.91E-34  |
| Unigene21779  | Potri.014G107500.1 | 8.3337  | 21.4437  | -1.3635 | Down | 6.56E-33  | 4.31E-32  |
| Unigene42774  | Potri.013G020500.2 | 5.3092  | 13.6622  | -1.3636 | Down | 1.80E-25  | 9.56E-25  |
| Unigene42003  | Potri.002G174300.1 | 12.231  | 31.473   | -1.3636 | Down | 5.50E-20  | 2.45E-19  |
| Unigene23209  | Potri.014G075600.1 | 1.5054  | 3.8744   | -1.3638 | Down | 6.36E-07  | 1.49E-06  |
| Unigene64069  | Potri.010G147600.1 | 7.7888  | 20.046   | -1.3638 | Down | 2.95E-15  | 1.09E-14  |
| Unigene29004  | Potri.008G003600.1 | 3.7719  | 9.7077   | -1.3638 | Down | 1.70E-12  | 5.54E-12  |
| Unigene7430   | Potri.006G257900.2 | 1.5364  | 3.9542   | -1.3638 | Down | 4.53E-04  | 8.06E-04  |
| Unigene42258  | Potri.002G182100.1 | 3.73    | 9.5998   | -1.3638 | Down | 6.36E-07  | 1.49E-06  |
| Unigene23249  | Potri.001G470100.1 | 2.0532  | 5.2843   | -1.3638 | Down | 6.36E-07  | 1.49E-06  |
| Unigene11241  | Potri.018G009100.1 | 14.1843 | 36.5063  | -1.3639 | Down | 5.20E-18  | 2.15E-17  |
| Unigene19887  | Potri.013G033900.1 | 1.3958  | 3.5924   | -1.3639 | Down | 4.53E-04  | 8.06E-04  |
| Unigene60407  | Potri.010G180600.1 | 3.0107  | 7.7487   | -1.3639 | Down | 4.53E-04  | 8.06E-04  |
| Unigene48601  | Potri.004G059200.2 | 1.6256  | 4.1839   | -1.3639 | Down | 4.53E-04  | 8.06E-04  |
| Unigene47324  | Potri.003G168000.2 | 5.9153  | 15.2244  | -1.3639 | Down | 6.36E-07  | 1.49E-06  |
| Unigene13295  | Potri.003G036500.1 | 5.9641  | 15.3499  | -1.3639 | Down | 6.57E-40  | 5.14E-39  |
| Unigene29570  | Potri.010G053700.1 | 15.0833 | 38.8244  | -1.364  | Down | 1.76E-32  | 1.14E-31  |
| Unigene11442  | Potri.010G001400.3 | 12.8461 | 33.0675  | -1.3641 | Down | 3.58E-44  | 3.08E-43  |
| Unigene71421  | Potri.008G084400.4 | 24.0702 | 61.9604  | -1.3641 | Down | 1.57E-21  | 7.37E-21  |
| Unigene26511  | Potri.016G040900.1 | 32.5088 | 83.6885  | -1.3642 | Down | 1.62E-30  | 9.99E-30  |
| Unigene84146  | Potri.002G201500.2 | 12.8386 | 33.0509  | -1.3642 | Down | 4.95E-16  | 1.89E-15  |
| Unigene4366   | Potri.002G077400.1 | 15.4063 | 39.6611  | -1.3642 | Down | 4.95E-16  | 1.89E-15  |
| Unigene9782   | Potri.001G271800.2 | 12.7006 | 32.6955  | -1.3642 | Down | 4.95E-16  | 1.89E-15  |
| Unigene17125  | Potri.006G259500.1 | 17.0799 | 43.9737  | -1.3643 | Down | 2.66E-22  | 1.28E-21  |
| Unigene93311  | Potri.T034000.2    | 3.9298  | 10.1181  | -1.3644 | Down | 1.67E-10  | 4.91E-10  |
| Unigene1725   | Potri.001G370900.1 | 19.976  | 51.4371  | -1.3645 | Down | 2.75E-38  | 2.07E-37  |
| Unigene92788  | Potri.019G039700.1 | 55.4692 | 142.8365 | -1.3646 | Down | 1.47E-115 | 3.79E-114 |
| Unigene36127  | Potri.011G115000.1 | 1.8315  | 4.7163   | -1.3646 | Down | 1.03E-07  | 2.55E-07  |
| Unigene68221  | Potri.009G011400.1 | 1.4213  | 3.66     | -1.3646 | Down | 1.03E-07  | 2.55E-07  |
| Unigene20551  | Potri.006G101800.2 | 17.5894 | 45.2924  | -1.3646 | Down | 4.51E-23  | 2.22E-22  |
| Unigene93203  | Potri.013G106500.1 | 2.806   | 7.226    | -1.3647 | Down | 1.03E-07  | 2.55E-07  |
| Unigene119269 | Potri.009G058700.1 | 2.3455  | 6.0401   | -1.3647 | Down | 1.03E-07  | 2.55E-07  |
| Unigene15071  | Potri.006G277100.1 | 2.8746  | 7.4025   | -1.3647 | Down | 1.03E-07  | 2.55E-07  |
| Unigene25912  | Potri.005G063600.1 | 23.4373 | 60.3548  | -1.3647 | Down | 1.39E-26  | 7.65E-26  |

|               |                    |         |          |         |      |           |           |
|---------------|--------------------|---------|----------|---------|------|-----------|-----------|
| Unigene103090 | Potri.005G033700.2 | 3.4289  | 8.8299   | -1.3647 | Down | 1.03E-07  | 2.55E-07  |
| Unigene19069  | Potri.001G083800.2 | 20.1636 | 51.9276  | -1.3647 | Down | 2.87E-52  | 2.94E-51  |
| Unigene6970   | Potri.007G121500.1 | 17.908  | 46.1217  | -1.3648 | Down | 2.37E-27  | 1.33E-26  |
| Unigene27823  | Potri.005G191500.1 | 7.6058  | 19.5875  | -1.3648 | Down | 7.65E-24  | 3.86E-23  |
| Unigene11631  | Potri.008G198200.1 | 43.3013 | 111.5291 | -1.3649 | Down | 1.15E-164 | 4.68E-163 |
| Unigene17273  | Potri.007G048300.1 | 5.2814  | 13.6025  | -1.3649 | Down | 2.78E-11  | 8.50E-11  |
| Unigene88204  | Potri.018G110000.2 | 12.471  | 32.1237  | -1.3651 | Down | 2.36E-18  | 9.89E-18  |
| Unigene26151  | Potri.006G060600.1 | 27.318  | 70.3713  | -1.3651 | Down | 2.20E-25  | 1.17E-24  |
| Unigene22999  | Potri.009G042400.2 | 31.4547 | 81.0333  | -1.3652 | Down | 7.55E-64  | 9.62E-63  |
| Unigene49892  | Potri.006G170400.2 | 9.3119  | 23.9878  | -1.3652 | Down | 6.85E-29  | 4.03E-28  |
| Unigene43204  | Potri.014G132900.1 | 16.4051 | 42.2645  | -1.3653 | Down | 4.00E-61  | 4.85E-60  |
| Unigene84413  | Potri.014G100700.1 | 9.2578  | 23.8509  | -1.3653 | Down | 4.62E-12  | 1.47E-11  |
| Unigene18285  | Potri.014G013100.4 | 4.4798  | 11.5414  | -1.3653 | Down | 1.34E-15  | 4.99E-15  |
| Unigene52492  | Potri.006G069300.1 | 4.2575  | 10.9687  | -1.3653 | Down | 1.68E-08  | 4.40E-08  |
| Unigene34263  | Potri.006G041000.1 | 6.3547  | 16.3718  | -1.3653 | Down | 1.21E-22  | 5.88E-22  |
| Unigene7693   | Potri.002G145000.1 | 4.3182  | 11.1251  | -1.3653 | Down | 4.62E-12  | 1.47E-11  |
| Unigene47835  | Potri.002G061000.1 | 27.8536 | 71.7593  | -1.3653 | Down | 1.15E-36  | 8.36E-36  |
| Unigene11117  | Potri.014G174300.1 | 8.2163  | 21.1711  | -1.3655 | Down | 6.97E-86  | 1.24E-84  |
| Unigene27292  | Potri.015G055500.7 | 6.9526  | 17.9163  | -1.3656 | Down | 7.69E-13  | 2.54E-12  |
| Unigene35211  | Potri.008G035800.2 | 17.9112 | 46.1533  | -1.3656 | Down | 2.24E-16  | 8.68E-16  |
| Unigene83738  | Potri.002G143000.1 | 13.3017 | 34.2756  | -1.3656 | Down | 2.24E-16  | 8.68E-16  |
| Unigene9167   | Potri.019G065300.1 | 15.4386 | 39.786   | -1.3657 | Down | 1.14E-20  | 5.18E-20  |
| Unigene19785  | Potri.015G138100.1 | 59.6793 | 153.7899 | -1.3657 | Down | 1.15E-91  | 2.20E-90  |
| Unigene33238  | Potri.006G157700.1 | 9.6678  | 24.9134  | -1.3657 | Down | 3.48E-24  | 1.78E-23  |
| Unigene63506  | Potri.009G106900.1 | 7.6091  | 19.6104  | -1.3658 | Down | 2.77E-09  | 7.57E-09  |
| Unigene13162  | Potri.004G147800.1 | 2.0973  | 5.4053   | -1.3658 | Down | 2.77E-09  | 7.58E-09  |
| Unigene72668  | Potri.002G022300.2 | 23.3122 | 60.0846  | -1.3659 | Down | 1.92E-21  | 8.98E-21  |
| Unigene45050  | Potri.013G126300.3 | 28.5311 | 73.5397  | -1.366  | Down | 4.65E-66  | 6.15E-65  |
| Unigene51374  | Potri.001G262000.1 | 13.4975 | 34.7907  | -1.366  | Down | 5.31E-30  | 3.22E-29  |
| Unigene49127  | Potri.017G149900.1 | 21.8804 | 56.4017  | -1.3661 | Down | 4.56E-47  | 4.19E-46  |
| Unigene76765  | Potri.016G028000.2 | 58.1676 | 149.9422 | -1.3661 | Down | 1.38E-55  | 1.51E-54  |
| Unigene2660   | Potri.004G210000.3 | 13.6558 | 35.2001  | -1.3661 | Down | 1.54E-38  | 1.16E-37  |
| Unigene70425  | Potri.013G041400.1 | 62.6632 | 161.5445 | -1.3662 | Down | 7.33E-53  | 7.59E-52  |
| Unigene31921  | Potri.009G059500.2 | 9.6554  | 24.8913  | -1.3662 | Down | 2.14E-78  | 3.43E-77  |
| Unigene38356  | Potri.006G238800.2 | 4.2686  | 11.0044  | -1.3662 | Down | 2.15E-14  | 7.63E-14  |
| Unigene104996 | Potri.001G146700.1 | 4.0015  | 10.3157  | -1.3662 | Down | 1.10E-05  | 2.32E-05  |
| Unigene43384  | Potri.017G056400.1 | 3.1744  | 8.1836   | -1.3663 | Down | 2.15E-14  | 7.63E-14  |
| Unigene101805 | Potri.008G026100.1 | 2.3469  | 6.0504   | -1.3663 | Down | 1.10E-05  | 2.32E-05  |
| Unigene13926  | Potri.010G176300.2 | 5.7206  | 14.7488  | -1.3664 | Down | 4.92E-28  | 2.82E-27  |

|              |                    |         |          |         |      |           |           |
|--------------|--------------------|---------|----------|---------|------|-----------|-----------|
| Unigene1561  | Potri.006G036800.1 | 8.8085  | 22.7105  | -1.3664 | Down | 9.35E-24  | 4.71E-23  |
| Unigene15220 | Potri.001G061400.6 | 16.8134 | 43.3508  | -1.3664 | Down | 4.47E-33  | 2.95E-32  |
| Unigene37967 | Potri.010G167100.1 | 39.1717 | 101.0061 | -1.3666 | Down | 3.81E-43  | 3.21E-42  |
| Unigene5495  | Potri.006G165700.3 | 36.3637 | 93.7655  | -1.3666 | Down | 3.81E-43  | 3.21E-42  |
| Unigene36361 | Potri.T054400.1    | 33.1262 | 85.4287  | -1.3667 | Down | 2.04E-40  | 1.62E-39  |
| Unigene41436 | Potri.019G106000.1 | 7.1119  | 18.3401  | -1.3667 | Down | 6.06E-16  | 2.30E-15  |
| Unigene85641 | Potri.015G092100.4 | 19.8675 | 51.2327  | -1.3667 | Down | 2.69E-25  | 1.42E-24  |
| Unigene54113 | Potri.012G057300.1 | 10.7863 | 27.8148  | -1.3667 | Down | 2.69E-25  | 1.42E-24  |
| Unigene44920 | Potri.002G237800.2 | 3.7945  | 9.7854   | -1.3667 | Down | 6.06E-16  | 2.30E-15  |
| Unigene80990 | Potri.001G166100.4 | 37.5956 | 96.9548  | -1.3667 | Down | 2.04E-40  | 1.62E-39  |
| Unigene28406 | Potri.012G042700.1 | 37.7717 | 97.411   | -1.3668 | Down | 1.79E-50  | 1.76E-49  |
| Unigene27881 | Potri.018G034700.3 | 4.8081  | 12.4009  | -1.3669 | Down | 1.25E-11  | 3.90E-11  |
| Unigene20236 | Potri.011G138900.1 | 2.1222  | 5.4735   | -1.3669 | Down | 1.76E-06  | 3.98E-06  |
| Unigene49010 | Potri.008G178400.3 | 1.8678  | 4.8173   | -1.3669 | Down | 1.76E-06  | 3.98E-06  |
| Unigene46295 | Potri.004G219300.3 | 10.7501 | 27.726   | -1.3669 | Down | 1.25E-11  | 3.90E-11  |
| Unigene51557 | Potri.001G350000.1 | 3.8952  | 10.0463  | -1.3669 | Down | 1.76E-06  | 3.98E-06  |
| Unigene43159 | Potri.001G147000.1 | 16.2293 | 41.8568  | -1.3669 | Down | 2.27E-81  | 3.78E-80  |
| Unigene30270 | Potri.013G035600.1 | 7.8818  | 20.3318  | -1.3671 | Down | 2.51E-23  | 1.25E-22  |
| Unigene26625 | Potri.009G057100.2 | 67.6858 | 174.5978 | -1.3671 | Down | 6.93E-66  | 9.13E-65  |
| Unigene45127 | Potri.001G352600.1 | 72.2623 | 186.4013 | -1.3671 | Down | 3.96E-124 | 1.11E-122 |
| Unigene1992  | Potri.006G275600.1 | 31.6459 | 81.6361  | -1.3672 | Down | 2.04E-67  | 2.75E-66  |
| Unigene53039 | Potri.016G029200.1 | 6.948   | 17.9258  | -1.3674 | Down | 2.84E-07  | 6.82E-07  |
| Unigene63575 | Potri.015G143000.2 | 2.7257  | 7.0324   | -1.3674 | Down | 2.84E-07  | 6.82E-07  |
| Unigene35279 | Potri.003G183800.1 | 4.5575  | 11.7584  | -1.3674 | Down | 2.84E-07  | 6.82E-07  |
| Unigene20328 | Potri.002G100700.2 | 2.522   | 6.5069   | -1.3674 | Down | 2.84E-07  | 6.82E-07  |
| Unigene76764 | Potri.014G145600.1 | 19.5535 | 50.4528  | -1.3675 | Down | 8.23E-20  | 3.64E-19  |
| Unigene4029  | Potri.001G253400.1 | 6.2812  | 16.2078  | -1.3676 | Down | 5.82E-14  | 2.03E-13  |
| Unigene44381 | Potri.009G161900.1 | 1.6234  | 4.1893   | -1.3677 | Down | 4.62E-08  | 1.17E-07  |
| Unigene8922  | Potri.009G056500.2 | 14.7576 | 38.0886  | -1.3679 | Down | 1.63E-15  | 6.09E-15  |
| Unigene43794 | Potri.004G196200.1 | 2.5105  | 6.4796   | -1.3679 | Down | 1.63E-15  | 6.09E-15  |
| Unigene65895 | Potri.003G078900.1 | 7.9677  | 20.5643  | -1.3679 | Down | 1.63E-15  | 6.09E-15  |
| Unigene48253 | Potri.002G078000.1 | 5.5562  | 14.3399  | -1.3679 | Down | 1.61E-56  | 1.79E-55  |
| Unigene19378 | Potri.008G149900.2 | 13.5635 | 35.0098  | -1.368  | Down | 2.75E-16  | 1.06E-15  |
| Unigene38335 | Potri.006G075000.1 | 16.6468 | 42.9665  | -1.368  | Down | 2.96E-30  | 1.81E-29  |
| Unigene27990 | Potri.002G234600.2 | 7.6025  | 19.6233  | -1.368  | Down | 2.75E-16  | 1.06E-15  |
| Unigene19865 | Potri.001G086300.1 | 7.8871  | 20.3581  | -1.368  | Down | 7.56E-09  | 2.01E-08  |
| Unigene43494 | Potri.017G097200.1 | 5.0487  | 13.0325  | -1.3681 | Down | 6.68E-40  | 5.22E-39  |
| Unigene11125 | Potri.005G170000.1 | 9.8356  | 25.3909  | -1.3682 | Down | 1.95E-41  | 1.58E-40  |
| Unigene23973 | Potri.001G329000.1 | 7.1982  | 18.5819  | -1.3682 | Down | 3.29E-25  | 1.73E-24  |

|              |                    |          |          |         |      |           |           |
|--------------|--------------------|----------|----------|---------|------|-----------|-----------|
| Unigene13100 | Potri.T102700.1    | 7.3218   | 18.9019  | -1.3683 | Down | 7.78E-18  | 3.19E-17  |
| Unigene9020  | Potri.017G069600.1 | 24.9679  | 64.4604  | -1.3683 | Down | 9.49E-27  | 5.24E-26  |
| Unigene14398 | Potri.009G081100.2 | 10.3773  | 26.7901  | -1.3683 | Down | 7.78E-18  | 3.19E-17  |
| Unigene33071 | Potri.015G074100.2 | 16.3401  | 42.1908  | -1.3685 | Down | 6.13E-38  | 4.58E-37  |
| Unigene34931 | Potri.014G083500.1 | 9.1928   | 23.7355  | -1.3685 | Down | 2.74E-28  | 1.58E-27  |
| Unigene23515 | Potri.006G031900.1 | 16.8602  | 43.534   | -1.3685 | Down | 4.66E-29  | 2.76E-28  |
| Unigene19645 | Potri.002G168100.2 | 8.1946   | 21.1581  | -1.3685 | Down | 2.05E-10  | 6.00E-10  |
| Unigene39318 | Potri.002G123300.1 | 3.4015   | 8.7826   | -1.3685 | Down | 2.05E-10  | 6.00E-10  |
| Unigene49847 | Potri.001G373300.1 | 6.3504   | 16.3965  | -1.3685 | Down | 2.74E-28  | 1.58E-27  |
| Unigene7874  | Potri.013G139400.1 | 15.6269  | 40.3508  | -1.3686 | Down | 2.43E-48  | 2.29E-47  |
| Unigene33239 | Potri.019G035700.2 | 23.0483  | 59.5196  | -1.3687 | Down | 8.90E-42  | 7.28E-41  |
| Unigene40219 | Potri.013G049100.3 | 10.5185  | 27.1652  | -1.3688 | Down | 3.07E-23  | 1.52E-22  |
| Unigene92993 | Potri.003G031900.1 | 77.9511  | 201.3102 | -1.3688 | Down | 1.51E-168 | 6.33E-167 |
| Unigene41717 | Potri.001G301600.2 | 8.1034   | 20.9271  | -1.3688 | Down | 5.66E-12  | 1.79E-11  |
| Unigene90197 | Potri.013G004700.2 | 50.3295  | 129.9857 | -1.3689 | Down | 4.55E-79  | 7.37E-78  |
| Unigene10126 | Potri.003G161600.1 | 16.1255  | 41.6465  | -1.3689 | Down | 1.94E-34  | 1.32E-33  |
| Unigene24927 | Potri.002G135500.1 | 23.9703  | 61.9069  | -1.3689 | Down | 1.94E-34  | 1.32E-33  |
| Unigene50320 | Potri.017G106100.1 | 3.3791   | 8.7278   | -1.369  | Down | 1.57E-13  | 5.38E-13  |
| Unigene5654  | Potri.010G152300.3 | 17.2422  | 44.5449  | -1.3693 | Down | 1.25E-16  | 4.87E-16  |
| Unigene79605 | Potri.003G070500.4 | 107.6008 | 277.989  | -1.3693 | Down | 6.59E-109 | 1.57E-107 |
| Unigene35562 | Potri.017G111300.3 | 13.1645  | 34.013   | -1.3694 | Down | 3.53E-18  | 1.47E-17  |
| Unigene40053 | Potri.015G017500.1 | 49.2103  | 127.1406 | -1.3694 | Down | 8.99E-98  | 1.87E-96  |
| Unigene33339 | Potri.015G002400.2 | 2.8395   | 7.3361   | -1.3694 | Down | 2.10E-17  | 8.46E-17  |
| Unigene38511 | Potri.014G075200.1 | 19.8441  | 51.2708  | -1.3694 | Down | 8.84E-35  | 6.08E-34  |
| Unigene49628 | Potri.014G014900.1 | 12.8062  | 33.0858  | -1.3694 | Down | 2.10E-17  | 8.46E-17  |
| Unigene45209 | Potri.010G169200.1 | 9.8257   | 25.3855  | -1.3694 | Down | 2.10E-17  | 8.46E-17  |
| Unigene31790 | Potri.009G049200.1 | 12.3239  | 31.8412  | -1.3694 | Down | 2.75E-168 | 1.15E-166 |
| Unigene42649 | Potri.010G013500.1 | 8.2621   | 21.3484  | -1.3695 | Down | 1.28E-38  | 9.69E-38  |
| Unigene76720 | Potri.004G103700.4 | 18.5676  | 47.9744  | -1.3695 | Down | 5.96E-19  | 2.55E-18  |
| Unigene49673 | Potri.016G138400.1 | 36.4666  | 94.2308  | -1.3696 | Down | 4.75E-62  | 5.86E-61  |
| Unigene46815 | Potri.016G116200.3 | 19.6475  | 50.769   | -1.3696 | Down | 2.88E-21  | 1.34E-20  |
| Unigene929   | Potri.007G123800.5 | 7.26     | 18.7607  | -1.3697 | Down | 8.25E-23  | 4.02E-22  |
| Unigene51156 | Potri.006G186600.1 | 8.6948   | 22.4684  | -1.3697 | Down | 8.25E-23  | 4.02E-22  |
| Unigene13330 | Potri.004G166600.1 | 19.3019  | 49.8802  | -1.3697 | Down | 2.37E-24  | 1.22E-23  |
| Unigene13633 | Potri.003G127300.1 | 4.2595   | 11.0075  | -1.3697 | Down | 2.37E-24  | 1.22E-23  |
| Unigene53923 | Potri.001G309800.1 | 13.3006  | 34.3703  | -1.3697 | Down | 5.42E-44  | 4.65E-43  |
| Unigene20284 | Potri.013G077900.1 | 21.6168  | 55.8635  | -1.3698 | Down | 4.02E-25  | 2.11E-24  |
| Unigene61942 | Potri.010G045100.1 | 38.9865  | 100.7659 | -1.37   | Down | 1.88E-65  | 2.46E-64  |
| Unigene32287 | Potri.006G195600.2 | 20.2354  | 52.3058  | -1.3701 | Down | 8.48E-43  | 7.09E-42  |

|               |                    |         |          |         |      |           |           |
|---------------|--------------------|---------|----------|---------|------|-----------|-----------|
| Unigene103723 | Potri.016G130500.1 | 2.5374  | 6.5608   | -1.3705 | Down | 1.97E-04  | 3.68E-04  |
| Unigene48003  | Potri.016G059500.3 | 3.2155  | 8.3142   | -1.3705 | Down | 3.08E-05  | 6.21E-05  |
| Unigene9832   | Potri.016G049000.1 | 6.4532  | 16.6859  | -1.3705 | Down | 3.39E-09  | 9.24E-09  |
| Unigene94184  | Potri.016G041100.2 | 1.4255  | 3.6858   | -1.3705 | Down | 4.88E-06  | 1.06E-05  |
| Unigene46836  | Potri.014G137200.1 | 1.3815  | 3.572    | -1.3705 | Down | 1.97E-04  | 3.68E-04  |
| Unigene67538  | Potri.013G075300.2 | 2.9738  | 7.6892   | -1.3705 | Down | 7.83E-07  | 1.82E-06  |
| Unigene53969  | Potri.011G119400.1 | 2.9603  | 7.6543   | -1.3705 | Down | 1.97E-04  | 3.68E-04  |
| Unigene28217  | Potri.008G102300.1 | 4.6101  | 11.9201  | -1.3705 | Down | 5.59E-10  | 1.60E-09  |
| Unigene30396  | Potri.008G076900.1 | 2.0955  | 5.4182   | -1.3705 | Down | 3.08E-05  | 6.21E-05  |
| Unigene36028  | Potri.008G035800.3 | 16.5582 | 42.8141  | -1.3705 | Down | 3.36E-16  | 1.29E-15  |
| Unigene59705  | Potri.008G021000.1 | 2.4468  | 6.3265   | -1.3705 | Down | 2.07E-08  | 5.37E-08  |
| Unigene51819  | Potri.007G018000.2 | 6.5704  | 16.9889  | -1.3705 | Down | 1.54E-11  | 4.76E-11  |
| Unigene115763 | Potri.005G170500.3 | 27.5366 | 71.2006  | -1.3705 | Down | 1.84E-35  | 1.29E-34  |
| Unigene3081   | Potri.003G106200.3 | 10.9974 | 28.4357  | -1.3705 | Down | 4.58E-20  | 2.04E-19  |
| Unigene83951  | Potri.002G229200.2 | 29.2679 | 75.6772  | -1.3705 | Down | 1.08E-34  | 7.42E-34  |
| Unigene18441  | Potri.001G392700.1 | 2.3827  | 6.1608   | -1.3705 | Down | 5.59E-10  | 1.60E-09  |
| Unigene41885  | Potri.001G135300.2 | 6.6872  | 17.2908  | -1.3705 | Down | 2.07E-08  | 5.37E-08  |
| Unigene24104  | Potri.012G097200.4 | 6.2657  | 16.2012  | -1.3706 | Down | 1.19E-14  | 4.28E-14  |
| Unigene24809  | Potri.008G012600.4 | 3.9001  | 10.0845  | -1.3706 | Down | 5.59E-10  | 1.60E-09  |
| Unigene40408  | Potri.006G046800.1 | 1.9882  | 5.141    | -1.3706 | Down | 3.39E-09  | 9.24E-09  |
| Unigene40054  | Potri.004G207500.1 | 2.53    | 6.5418   | -1.3706 | Down | 7.83E-07  | 1.82E-06  |
| Unigene75114  | Potri.003G142500.1 | 5.1095  | 13.2116  | -1.3706 | Down | 4.88E-06  | 1.06E-05  |
| Unigene29830  | Potri.002G171600.1 | 1.6771  | 4.3365   | -1.3706 | Down | 3.08E-05  | 6.21E-05  |
| Unigene14169  | Potri.001G470300.4 | 3.9512  | 10.2166  | -1.3706 | Down | 3.08E-05  | 6.21E-05  |
| Unigene24548  | Potri.001G368600.1 | 1.258   | 3.2528   | -1.3706 | Down | 1.97E-04  | 3.68E-04  |
| Unigene47961  | Potri.001G289500.1 | 4.1139  | 10.6373  | -1.3706 | Down | 4.88E-06  | 1.06E-05  |
| Unigene18278  | Potri.016G137200.2 | 15.2751 | 39.5048  | -1.3708 | Down | 4.13E-61  | 5.00E-60  |
| Unigene39174  | Potri.019G112400.1 | 18.2876 | 47.3054  | -1.3711 | Down | 9.95E-33  | 6.51E-32  |
| Unigene32991  | Potri.003G188700.1 | 8.6042  | 22.2571  | -1.3712 | Down | 5.84E-32  | 3.74E-31  |
| Unigene1618   | Potri.012G104300.1 | 27.6392 | 71.5046  | -1.3713 | Down | 3.46E-49  | 3.32E-48  |
| Unigene41693  | Potri.002G192800.4 | 18.5279 | 47.9333  | -1.3713 | Down | 4.91E-25  | 2.58E-24  |
| Unigene49925  | Potri.008G109300.1 | 8.9469  | 23.1472  | -1.3714 | Down | 1.71E-23  | 8.52E-23  |
| Unigene45142  | Potri.005G143200.2 | 14.5272 | 37.5868  | -1.3715 | Down | 1.62E-41  | 1.32E-40  |
| Unigene27379  | Potri.001G370000.2 | 21.1653 | 54.764   | -1.3715 | Down | 2.08E-20  | 9.39E-20  |
| Unigene82592  | Potri.001G208200.5 | 68.0503 | 176.0787 | -1.3715 | Down | 3.79E-75  | 5.78E-74  |
| Unigene18373  | Potri.013G145700.1 | 8.4563  | 21.8817  | -1.3716 | Down | 1.35E-52  | 1.40E-51  |
| Unigene44716  | Potri.004G153400.1 | 27.2638 | 70.5494  | -1.3716 | Down | 7.91E-52  | 8.03E-51  |
| Unigene42628  | Potri.002G077400.1 | 17.6152 | 45.5823  | -1.3717 | Down | 4.44E-101 | 9.62E-100 |
| Unigene2979   | Potri.015G132400.2 | 4.4566  | 11.5337  | -1.3718 | Down | 9.07E-16  | 3.41E-15  |

|              |                    |          |          |         |      |           |           |
|--------------|--------------------|----------|----------|---------|------|-----------|-----------|
| Unigene42190 | Potri.005G252500.2 | 25.4632  | 65.9037  | -1.3719 | Down | 4.33E-41  | 3.49E-40  |
| Unigene48400 | Potri.001G135900.3 | 5.6633   | 14.6574  | -1.3719 | Down | 5.40E-15  | 1.97E-14  |
| Unigene24482 | Potri.016G077100.1 | 11.5871  | 29.9903  | -1.372  | Down | 2.67E-66  | 3.55E-65  |
| Unigene3217  | Potri.015G094100.1 | 7.6696   | 19.8505  | -1.372  | Down | 4.33E-41  | 3.49E-40  |
| Unigene71469 | Potri.014G035800.3 | 46.1191  | 119.3679 | -1.372  | Down | 2.53E-40  | 2.00E-39  |
| Unigene27950 | Potri.002G067800.1 | 44.876   | 116.1604 | -1.3721 | Down | 3.23E-108 | 7.63E-107 |
| Unigene10753 | Potri.012G077500.2 | 6.8431   | 17.7147  | -1.3722 | Down | 2.43E-56  | 2.70E-55  |
| Unigene63080 | Potri.010G029200.2 | 7.5226   | 19.4735  | -1.3722 | Down | 1.15E-12  | 3.78E-12  |
| Unigene92867 | Potri.014G069400.1 | 20.2525  | 52.4291  | -1.3723 | Down | 1.69E-44  | 1.46E-43  |
| Unigene54317 | Potri.013G128100.1 | 6.385    | 16.5294  | -1.3723 | Down | 4.59E-23  | 2.26E-22  |
| Unigene42322 | Potri.011G070900.2 | 9.0875   | 23.5266  | -1.3723 | Down | 6.93E-12  | 2.19E-11  |
| Unigene14291 | Potri.012G059000.2 | 19.8828  | 51.4769  | -1.3724 | Down | 1.60E-21  | 7.48E-21  |
| Unigene18593 | Potri.001G087700.1 | 10.0243  | 25.9529  | -1.3724 | Down | 1.60E-21  | 7.48E-21  |
| Unigene31348 | Potri.010G189000.2 | 12.7064  | 32.8989  | -1.3725 | Down | 9.45E-21  | 4.31E-20  |
| Unigene65576 | Potri.T118900.1    | 4.9675   | 12.863   | -1.3726 | Down | 2.52E-10  | 7.31E-10  |
| Unigene35370 | Potri.017G062400.1 | 12.1607  | 31.4876  | -1.3726 | Down | 5.59E-20  | 2.49E-19  |
| Unigene83592 | Potri.001G356100.1 | 32.7575  | 84.819   | -1.3726 | Down | 2.33E-38  | 1.75E-37  |
| Unigene50712 | Potri.011G156900.1 | 9.5404   | 24.7055  | -1.3727 | Down | 2.94E-27  | 1.65E-26  |
| Unigene3652  | Potri.010G234300.1 | 38.5083  | 99.7188  | -1.3727 | Down | 4.68E-36  | 3.34E-35  |
| Unigene10454 | Potri.014G148500.1 | 15.4774  | 40.0816  | -1.3728 | Down | 1.73E-26  | 9.48E-26  |
| Unigene21720 | Potri.001G403900.1 | 4.038    | 10.4576  | -1.3728 | Down | 1.02E-25  | 5.45E-25  |
| Unigene54217 | Potri.017G051200.1 | 33.4177  | 86.5528  | -1.373  | Down | 3.25E-32  | 2.10E-31  |
| Unigene875   | Potri.010G195800.1 | 8.9955   | 23.2986  | -1.373  | Down | 3.25E-32  | 2.10E-31  |
| Unigene89299 | Potri.003G070500.3 | 55.8434  | 144.6439 | -1.373  | Down | 6.98E-83  | 1.19E-81  |
| Unigene44858 | Potri.015G100900.1 | 2.6847   | 6.9539   | -1.3731 | Down | 9.28E-09  | 2.46E-08  |
| Unigene47228 | Potri.003G064100.3 | 6.6911   | 17.3318  | -1.3731 | Down | 9.28E-09  | 2.46E-08  |
| Unigene1207  | Potri.013G029200.1 | 4.0385   | 10.4618  | -1.3732 | Down | 2.45E-15  | 9.05E-15  |
| Unigene2170  | Potri.005G213500.1 | 7.41     | 19.1956  | -1.3732 | Down | 2.45E-15  | 9.05E-15  |
| Unigene42584 | Potri.T078200.1    | 8.0366   | 20.8196  | -1.3733 | Down | 7.27E-22  | 3.44E-21  |
| Unigene11732 | Potri.011G126800.1 | 6.9308   | 17.9551  | -1.3733 | Down | 7.27E-22  | 3.44E-21  |
| Unigene21523 | Potri.007G087200.4 | 7.3202   | 18.9634  | -1.3733 | Down | 1.25E-35  | 8.83E-35  |
| Unigene41205 | Potri.018G113100.1 | 25.3492  | 65.6749  | -1.3734 | Down | 4.31E-34  | 2.92E-33  |
| Unigene71806 | Potri.006G254900.5 | 7.6793   | 19.8956  | -1.3734 | Down | 5.67E-08  | 1.43E-07  |
| Unigene43964 | Potri.002G022300.2 | 5.1874   | 13.4394  | -1.3734 | Down | 1.46E-14  | 5.22E-14  |
| Unigene1969  | Potri.001G124300.1 | 3.1083   | 8.053    | -1.3734 | Down | 5.67E-08  | 1.43E-07  |
| Unigene28207 | Potri.001G117900.1 | 9.4944   | 24.5982  | -1.3734 | Down | 1.46E-14  | 5.22E-14  |
| Unigene73677 | Potri.006G144000.1 | 120.3438 | 311.8144 | -1.3735 | Down | 4.17E-107 | 9.69E-106 |
| Unigene29249 | Potri.004G133600.3 | 10.2386  | 26.5295  | -1.3736 | Down | 1.23E-62  | 1.53E-61  |
| Unigene3113  | Potri.014G189500.1 | 9.0398   | 23.4267  | -1.3738 | Down | 3.29E-70  | 4.64E-69  |



|               |                    |         |          |         |      |           |           |
|---------------|--------------------|---------|----------|---------|------|-----------|-----------|
| Unigene65589  | Potri.009G007900.2 | 9.7189  | 25.1865  | -1.3738 | Down | 5.22E-13  | 1.74E-12  |
| Unigene34008  | Potri.008G143000.3 | 2.2259  | 5.7685   | -1.3738 | Down | 3.49E-07  | 8.31E-07  |
| Unigene40526  | Potri.008G135600.5 | 1.8231  | 4.7245   | -1.3738 | Down | 3.49E-07  | 8.31E-07  |
| Unigene35989  | Potri.006G122300.1 | 6.9004  | 17.8824  | -1.3738 | Down | 3.49E-07  | 8.31E-07  |
| Unigene56328  | Potri.004G097300.1 | 6.3307  | 16.4059  | -1.3738 | Down | 3.49E-07  | 8.31E-07  |
| Unigene115505 | Potri.003G150400.1 | 4.7426  | 12.2903  | -1.3738 | Down | 3.49E-07  | 8.31E-07  |
| Unigene20177  | Potri.012G093000.2 | 15.7975 | 40.9416  | -1.3739 | Down | 1.77E-29  | 1.06E-28  |
| Unigene9732   | Potri.011G079700.1 | 13.6495 | 35.3805  | -1.3741 | Down | 3.14E-17  | 1.26E-16  |
| Unigene12927  | Potri.010G016100.1 | 13.4278 | 34.8066  | -1.3741 | Down | 7.59E-38  | 5.66E-37  |
| Unigene34724  | Potri.009G153300.1 | 3.9406  | 10.2144  | -1.3741 | Down | 3.14E-17  | 1.26E-16  |
| Unigene8706   | Potri.008G070600.1 | 4.4165  | 11.4478  | -1.3741 | Down | 3.14E-17  | 1.26E-16  |
| Unigene11467  | Potri.014G096700.1 | 31.3125 | 81.1695  | -1.3742 | Down | 6.53E-93  | 1.27E-91  |
| Unigene70714  | Potri.017G147500.2 | 29.8396 | 77.3565  | -1.3743 | Down | 2.11E-26  | 1.15E-25  |
| Unigene17406  | Potri.012G129900.1 | 3.6613  | 9.4916   | -1.3743 | Down | 2.17E-06  | 4.84E-06  |
| Unigene3676   | Potri.002G186100.1 | 3.5523  | 9.2091   | -1.3743 | Down | 2.17E-06  | 4.84E-06  |
| Unigene92351  | Potri.014G043700.1 | 58.5682 | 151.8488 | -1.3744 | Down | 1.34E-115 | 3.44E-114 |
| Unigene17293  | Potri.006G198300.2 | 36.2    | 93.8566  | -1.3745 | Down | 7.97E-68  | 1.08E-66  |
| Unigene109194 | Potri.003G119200.1 | 10.3318 | 26.7901  | -1.3746 | Down | 1.13E-10  | 3.36E-10  |
| Unigene36665  | Potri.002G141100.1 | 46.4919 | 120.5556 | -1.3746 | Down | 2.30E-42  | 1.90E-41  |
| Unigene33454  | Potri.001G166800.3 | 5.4554  | 14.1468  | -1.3747 | Down | 6.61E-15  | 2.40E-14  |
| Unigene32472  | Potri.005G047000.1 | 8.0091  | 20.7706  | -1.3748 | Down | 5.24E-45  | 4.59E-44  |
| Unigene43430  | Potri.018G130900.1 | 3.7438  | 9.7102   | -1.375  | Down | 6.86E-10  | 1.94E-09  |
| Unigene48689  | Potri.018G056900.3 | 3.8438  | 9.9696   | -1.375  | Down | 1.36E-05  | 2.84E-05  |
| Unigene94575  | Potri.016G074900.1 | 3.509   | 9.1012   | -1.375  | Down | 1.36E-05  | 2.84E-05  |
| Unigene28846  | Potri.015G004400.2 | 11.7445 | 30.4611  | -1.375  | Down | 4.09E-35  | 2.84E-34  |
| Unigene30155  | Potri.011G122200.1 | 4.1615  | 10.7935  | -1.375  | Down | 1.36E-05  | 2.84E-05  |
| Unigene101    | Potri.009G040500.1 | 11.1233 | 28.8495  | -1.375  | Down | 6.70E-136 | 2.11E-134 |
| Unigene17450  | Potri.005G204500.1 | 1.893   | 4.9098   | -1.375  | Down | 1.36E-05  | 2.84E-05  |
| Unigene17484  | Potri.005G053500.1 | 2.6856  | 6.9654   | -1.375  | Down | 1.36E-05  | 2.84E-05  |
| Unigene51821  | Potri.003G138400.8 | 2.6502  | 6.8738   | -1.375  | Down | 1.36E-05  | 2.84E-05  |
| Unigene15393  | Potri.002G038300.2 | 3.357   | 8.7068   | -1.375  | Down | 1.36E-05  | 2.84E-05  |
| Unigene6663   | Potri.002G002400.1 | 6.7289  | 17.4524  | -1.375  | Down | 3.95E-14  | 1.38E-13  |
| Unigene2344   | Potri.001G298500.1 | 3.8292  | 9.9317   | -1.375  | Down | 6.86E-10  | 1.94E-09  |
| Unigene51124  | Potri.001G287400.3 | 7.2452  | 18.7916  | -1.375  | Down | 2.40E-18  | 1.00E-17  |
| Unigene18677  | Potri.015G051000.1 | 6.0502  | 15.6944  | -1.3752 | Down | 1.42E-17  | 5.78E-17  |
| Unigene118231 | Potri.010G178900.1 | 31.8693 | 82.6722  | -1.3752 | Down | 4.22E-57  | 4.76E-56  |
| Unigene44157  | Potri.001G164300.1 | 9.4861  | 24.6072  | -1.3752 | Down | 1.42E-17  | 5.78E-17  |
| Unigene22122  | Potri.019G054600.3 | 4.7723  | 12.3803  | -1.3753 | Down | 2.36E-13  | 8.00E-13  |
| Unigene25951  | Potri.009G051000.2 | 35.0236 | 90.8594  | -1.3753 | Down | 1.40E-44  | 1.22E-43  |

|              |                    |         |          |         |      |           |           |
|--------------|--------------------|---------|----------|---------|------|-----------|-----------|
| Unigene50699 | Potri.001G473100.1 | 5.3385  | 13.8491  | -1.3753 | Down | 2.36E-13  | 8.00E-13  |
| Unigene25246 | Potri.014G104500.2 | 14.7281 | 38.2135  | -1.3755 | Down | 7.45E-28  | 4.26E-27  |
| Unigene53339 | Potri.011G090900.1 | 12.899  | 33.4684  | -1.3755 | Down | 3.11E-20  | 1.39E-19  |
| Unigene39468 | Potri.009G007900.2 | 5.3412  | 13.8586  | -1.3755 | Down | 3.11E-20  | 1.39E-19  |
| Unigene89611 | Potri.014G172300.3 | 17.0393 | 44.2149  | -1.3757 | Down | 4.39E-27  | 2.45E-26  |
| Unigene30539 | Potri.015G131100.4 | 21.0306 | 54.5778  | -1.3758 | Down | 2.58E-26  | 1.41E-25  |
| Unigene81    | Potri.003G086200.1 | 7.155   | 18.5694  | -1.3759 | Down | 8.54E-47  | 7.80E-46  |
| Unigene40744 | Potri.019G096900.1 | 1.4812  | 3.8444   | -1.376  | Down | 8.64E-05  | 1.67E-04  |
| Unigene28386 | Potri.018G066200.1 | 9.2985  | 24.1339  | -1.376  | Down | 2.99E-15  | 1.10E-14  |
| Unigene80738 | Potri.012G098500.1 | 6.5647  | 17.0385  | -1.376  | Down | 2.54E-08  | 6.55E-08  |
| Unigene19023 | Potri.012G060000.1 | 2.7583  | 7.159    | -1.376  | Down | 2.54E-08  | 6.55E-08  |
| Unigene8471  | Potri.010G216000.1 | 1.3631  | 3.5379   | -1.376  | Down | 8.64E-05  | 1.67E-04  |
| Unigene43423 | Potri.005G202800.1 | 1.2862  | 3.3383   | -1.376  | Down | 2.54E-08  | 6.55E-08  |
| Unigene54427 | Potri.002G157200.1 | 4.7988  | 12.4551  | -1.376  | Down | 2.54E-08  | 6.55E-08  |
| Unigene16369 | Potri.001G256100.1 | 21.6896 | 56.2947  | -1.376  | Down | 4.04E-22  | 1.93E-21  |
| Unigene11141 | Potri.012G077500.1 | 23.1104 | 59.9879  | -1.3761 | Down | 5.37E-128 | 1.56E-126 |
| Unigene18690 | Potri.015G007200.1 | 22.9654 | 59.6136  | -1.3762 | Down | 6.67E-48  | 6.25E-47  |
| Unigene32810 | Potri.006G279800.1 | 10.0803 | 26.1665  | -1.3762 | Down | 5.72E-71  | 8.16E-70  |
| Unigene43464 | Potri.002G112200.1 | 12.1382 | 31.5094  | -1.3762 | Down | 4.23E-129 | 1.24E-127 |
| Unigene10854 | Potri.002G105800.1 | 6.0001  | 15.5753  | -1.3762 | Down | 4.39E-41  | 3.53E-40  |
| Unigene81718 | Potri.002G038800.1 | 67.1683 | 174.3975 | -1.3765 | Down | 3.52E-73  | 5.21E-72  |
| Unigene69176 | Potri.018G014000.3 | 12.7068 | 32.9942  | -1.3766 | Down | 6.29E-57  | 7.06E-56  |
| Unigene19980 | Potri.012G051200.1 | 1.9738  | 5.1254   | -1.3767 | Down | 1.56E-07  | 3.81E-07  |
| Unigene32704 | Potri.012G046000.2 | 13.5319 | 35.1387  | -1.3767 | Down | 5.16E-38  | 3.86E-37  |
| Unigene43776 | Potri.010G070200.1 | 1.629   | 4.23     | -1.3767 | Down | 1.56E-07  | 3.81E-07  |
| Unigene8603  | Potri.007G070700.1 | 4.0074  | 10.4061  | -1.3767 | Down | 1.56E-07  | 3.81E-07  |
| Unigene32533 | Potri.006G210600.1 | 17.2534 | 44.8014  | -1.3767 | Down | 1.20E-71  | 1.73E-70  |
| Unigene17737 | Potri.005G139800.1 | 2.2694  | 5.893    | -1.3767 | Down | 1.56E-07  | 3.81E-07  |
| Unigene7541  | Potri.018G139800.1 | 8.5292  | 22.1499  | -1.3768 | Down | 1.84E-22  | 8.87E-22  |
| Unigene8317  | Potri.004G190800.1 | 10.2631 | 26.6526  | -1.3768 | Down | 1.84E-22  | 8.87E-22  |
| Unigene11816 | Potri.001G253800.1 | 29.3626 | 76.2584  | -1.3769 | Down | 1.14E-106 | 2.63E-105 |
| Unigene32064 | Potri.014G142600.1 | 15.4922 | 40.2362  | -1.377  | Down | 2.85E-103 | 6.34E-102 |
| Unigene20544 | Potri.003G166200.1 | 4.3913  | 11.4051  | -1.377  | Down | 9.10E-28  | 5.18E-27  |
| Unigene23382 | Potri.001G278800.2 | 9.5596  | 24.8284  | -1.377  | Down | 4.95E-19  | 2.13E-18  |
| Unigene35497 | Potri.019G089500.1 | 4.5242  | 11.7523  | -1.3772 | Down | 1.36E-15  | 5.07E-15  |
| Unigene37480 | Potri.019G055300.1 | 9.8734  | 25.6476  | -1.3772 | Down | 1.36E-15  | 5.07E-15  |
| Unigene11150 | Potri.013G147600.1 | 11.7193 | 30.4433  | -1.3772 | Down | 6.95E-63  | 8.69E-62  |
| Unigene7767  | Potri.004G048500.1 | 7.2121  | 18.734   | -1.3772 | Down | 5.36E-27  | 2.98E-26  |
| Unigene50132 | Potri.016G062900.2 | 2.7745  | 7.2078   | -1.3773 | Down | 6.42E-21  | 2.94E-20  |

|               |                    |          |          |         |      |           |           |
|---------------|--------------------|----------|----------|---------|------|-----------|-----------|
| Unigene39563  | Potri.005G178100.1 | 4.1932   | 10.8934  | -1.3773 | Down | 6.42E-21  | 2.94E-20  |
| Unigene53873  | Potri.012G024800.3 | 22.9692  | 59.6756  | -1.3774 | Down | 8.09E-37  | 5.88E-36  |
| Unigene43106  | Potri.004G134400.1 | 19.7618  | 51.3412  | -1.3774 | Down | 7.58E-86  | 1.35E-84  |
| Unigene21018  | Potri.018G149900.2 | 4.0517   | 10.5278  | -1.3776 | Down | 9.63E-07  | 2.22E-06  |
| Unigene116498 | Potri.018G050800.5 | 1.9754   | 5.1327   | -1.3776 | Down | 5.62E-04  | 9.92E-04  |
| Unigene46885  | Potri.011G094100.4 | 2.1422   | 5.5662   | -1.3776 | Down | 5.62E-04  | 9.92E-04  |
| Unigene52619  | Potri.010G192900.2 | 17.7481  | 46.1158  | -1.3776 | Down | 9.31E-31  | 5.77E-30  |
| Unigene41691  | Potri.008G184400.1 | 1.5206   | 3.9511   | -1.3776 | Down | 5.62E-04  | 9.92E-04  |
| Unigene27369  | Potri.007G135500.2 | 2.7811   | 7.2263   | -1.3776 | Down | 5.62E-04  | 9.92E-04  |
| Unigene1608   | Potri.006G257400.1 | 7.438    | 19.3266  | -1.3776 | Down | 3.83E-12  | 1.22E-11  |
| Unigene10400  | Potri.006G070900.3 | 4.1042   | 10.664   | -1.3776 | Down | 9.63E-07  | 2.22E-06  |
| Unigene114900 | Potri.006G019900.1 | 2.2809   | 5.9266   | -1.3776 | Down | 5.62E-04  | 9.92E-04  |
| Unigene53792  | Potri.001G443200.2 | 21.9409  | 57.0102  | -1.3776 | Down | 4.15E-28  | 2.39E-27  |
| Unigene32031  | Potri.009G122900.1 | 14.2531  | 37.036   | -1.3777 | Down | 2.51E-93  | 4.91E-92  |
| Unigene79581  | Potri.013G057000.2 | 160.5569 | 417.2316 | -1.3778 | Down | 5.38E-164 | 2.18E-162 |
| Unigene20257  | Potri.009G017400.4 | 30.8538  | 80.1852  | -1.3779 | Down | 1.60E-57  | 1.82E-56  |
| Unigene50458  | Potri.011G071400.1 | 7.1558   | 18.5989  | -1.378  | Down | 4.83E-14  | 1.69E-13  |
| Unigene574    | Potri.009G011200.1 | 8.411    | 21.8608  | -1.378  | Down | 8.14E-72  | 1.18E-70  |
| Unigene4293   | Potri.005G249900.1 | 7.3316   | 19.0559  | -1.378  | Down | 4.83E-14  | 1.69E-13  |
| Unigene24520  | Potri.001G280600.1 | 4.2997   | 11.1754  | -1.378  | Down | 4.83E-14  | 1.69E-13  |
| Unigene13423  | Potri.009G031500.1 | 8.3034   | 21.5836  | -1.3782 | Down | 4.24E-31  | 2.66E-30  |
| Unigene44442  | Potri.006G182800.1 | 2.8142   | 7.3152   | -1.3782 | Down | 2.30E-11  | 7.09E-11  |
| Unigene40149  | Potri.T104300.1    | 4.1951   | 10.906   | -1.3783 | Down | 1.14E-08  | 3.00E-08  |
| Unigene38484  | Potri.012G092000.1 | 17.9691  | 46.7116  | -1.3783 | Down | 8.71E-43  | 7.28E-42  |
| Unigene37479  | Potri.018G097300.1 | 16.8765  | 43.8743  | -1.3784 | Down | 3.81E-23  | 1.88E-22  |
| Unigene32289  | Potri.016G091100.1 | 7.6149   | 19.7978  | -1.3784 | Down | 1.11E-27  | 6.31E-27  |
| Unigene8241   | Potri.009G066000.2 | 10.1326  | 26.3419  | -1.3784 | Down | 3.81E-23  | 1.88E-22  |
| Unigene32729  | Potri.018G021300.2 | 3.4968   | 9.0919   | -1.3785 | Down | 2.89E-13  | 9.75E-13  |
| Unigene21391  | Potri.014G120100.4 | 6.5042   | 16.9107  | -1.3785 | Down | 3.30E-32  | 2.13E-31  |
| Unigene81581  | Potri.002G056200.1 | 32.9114  | 85.5708  | -1.3785 | Down | 9.87E-37  | 7.17E-36  |
| Unigene97107  | Potri.003G170100.1 | 37.1533  | 96.6021  | -1.3786 | Down | 2.98E-41  | 2.41E-40  |
| Unigene54310  | Potri.015G040100.4 | 2.4659   | 6.4125   | -1.3788 | Down | 3.66E-15  | 1.34E-14  |
| Unigene13076  | Potri.014G031900.1 | 4.3164   | 11.2249  | -1.3788 | Down | 2.94E-24  | 1.50E-23  |
| Unigene53994  | Potri.006G061500.2 | 2.9964   | 7.7921   | -1.3788 | Down | 1.39E-10  | 4.09E-10  |
| Unigene29805  | Potri.005G251300.4 | 4.703    | 12.2303  | -1.3788 | Down | 6.01E-06  | 1.30E-05  |
| Unigene44944  | Potri.005G143200.2 | 22.2931  | 57.9721  | -1.3788 | Down | 9.40E-138 | 3.02E-136 |
| Unigene95353  | Potri.005G110500.4 | 2.8391   | 7.3831   | -1.3788 | Down | 6.01E-06  | 1.30E-05  |
| Unigene29057  | Potri.005G105400.1 | 2.1764   | 5.6599   | -1.3788 | Down | 6.01E-06  | 1.30E-05  |
| Unigene46395  | Potri.002G238500.1 | 3.3909   | 8.8181   | -1.3788 | Down | 6.01E-06  | 1.30E-05  |

|              |                    |         |         |         |      |           |           |
|--------------|--------------------|---------|---------|---------|------|-----------|-----------|
| Unigene88371 | Potri.001G371900.1 | 19.5486 | 50.8367 | -1.3788 | Down | 8.61E-29  | 5.05E-28  |
| Unigene24906 | Potri.001G072400.1 | 8.9028  | 23.152  | -1.3788 | Down | 1.39E-10  | 4.09E-10  |
| Unigene27463 | Potri.015G067300.2 | 7.9782  | 20.7496 | -1.3789 | Down | 3.85E-26  | 2.09E-25  |
| Unigene17098 | Potri.014G191100.4 | 20.5685 | 53.4976 | -1.379  | Down | 1.82E-43  | 1.54E-42  |
| Unigene42916 | Potri.003G058300.1 | 19.3657 | 50.3665 | -1.379  | Down | 6.29E-86  | 1.12E-84  |
| Unigene54040 | Potri.006G195600.2 | 10.809  | 28.1176 | -1.3792 | Down | 8.82E-32  | 5.62E-31  |
| Unigene38360 | Potri.003G134200.2 | 12.3222 | 32.0525 | -1.3792 | Down | 6.05E-19  | 2.59E-18  |
| Unigene48866 | Potri.014G137200.1 | 2.2859  | 5.9467  | -1.3793 | Down | 2.18E-14  | 7.75E-14  |
| Unigene3701  | Potri.012G144200.2 | 11.7336 | 30.5243 | -1.3793 | Down | 7.84E-21  | 3.59E-20  |
| Unigene16742 | Potri.008G178200.1 | 28.7189 | 74.7105 | -1.3793 | Down | 2.98E-27  | 1.67E-26  |
| Unigene31730 | Potri.007G124400.1 | 35.9831 | 93.6079 | -1.3793 | Down | 4.67E-40  | 3.66E-39  |
| Unigene37733 | Potri.003G178600.3 | 5.4038  | 14.0577 | -1.3793 | Down | 6.96E-08  | 1.75E-07  |
| Unigene2525  | Potri.014G025700.1 | 16.2843 | 42.3644 | -1.3794 | Down | 1.00E-75  | 1.54E-74  |
| Unigene11480 | Potri.014G086700.2 | 4.2873  | 11.1549 | -1.3795 | Down | 6.85E-33  | 4.51E-32  |
| Unigene12473 | Potri.004G029900.1 | 7.2527  | 18.87   | -1.3795 | Down | 1.34E-24  | 6.90E-24  |
| Unigene28955 | Potri.003G009900.1 | 4.6528  | 12.1055 | -1.3795 | Down | 2.73E-39  | 2.11E-38  |
| Unigene6733  | Potri.018G047100.1 | 14.8677 | 38.6865 | -1.3796 | Down | 2.31E-28  | 1.34E-27  |
| Unigene7738  | Potri.013G056500.1 | 18.1573 | 47.2441 | -1.3796 | Down | 8.16E-68  | 1.11E-66  |
| Unigene13175 | Potri.007G098200.1 | 8.7023  | 22.6429 | -1.3796 | Down | 2.64E-51  | 2.65E-50  |
| Unigene22377 | Potri.014G140700.1 | 20.4714 | 53.2688 | -1.3797 | Down | 4.64E-20  | 2.07E-19  |
| Unigene48736 | Potri.015G071800.2 | 37.4314 | 97.4101 | -1.3798 | Down | 5.05E-46  | 4.54E-45  |
| Unigene53787 | Potri.002G068600.1 | 16.8366 | 43.813  | -1.3798 | Down | 6.03E-22  | 2.86E-21  |
| Unigene17072 | Potri.011G050700.1 | 8.0903  | 21.0548 | -1.3799 | Down | 1.31E-13  | 4.48E-13  |
| Unigene31296 | Potri.009G042100.2 | 18.5594 | 48.3002 | -1.3799 | Down | 9.03E-50  | 8.77E-49  |
| Unigene48793 | Potri.006G136900.2 | 22.9242 | 59.6618 | -1.3799 | Down | 2.18E-67  | 2.94E-66  |
| Unigene24248 | Potri.001G277400.1 | 5.1819  | 13.4872 | -1.38   | Down | 2.13E-17  | 8.58E-17  |
| Unigene42795 | Potri.013G032100.1 | 9.5341  | 24.8168 | -1.3801 | Down | 1.30E-42  | 1.08E-41  |
| Unigene91393 | Potri.006G232900.1 | 34.4509 | 89.6734 | -1.3801 | Down | 4.10E-62  | 5.06E-61  |
| Unigene34160 | Potri.014G075200.3 | 11.47   | 29.8559 | -1.3802 | Down | 1.30E-42  | 1.08E-41  |
| Unigene86225 | Potri.010G239000.2 | 17.0904 | 44.486  | -1.3802 | Down | 4.65E-23  | 2.29E-22  |
| Unigene728   | Potri.010G090100.2 | 11.352  | 29.5488 | -1.3802 | Down | 4.11E-126 | 1.17E-124 |
| Unigene12037 | Potri.011G128000.1 | 12.04   | 31.3434 | -1.3803 | Down | 5.70E-40  | 4.46E-39  |
| Unigene23216 | Potri.010G027800.1 | 15.7185 | 40.9175 | -1.3803 | Down | 1.39E-30  | 8.56E-30  |
| Unigene32897 | Potri.019G024200.2 | 6.3243  | 16.465  | -1.3804 | Down | 3.65E-81  | 6.08E-80  |
| Unigene74056 | Potri.014G053300.1 | 4.1831  | 10.8913 | -1.3805 | Down | 3.80E-05  | 7.60E-05  |
| Unigene34281 | Potri.012G122600.1 | 2.3373  | 6.0855  | -1.3805 | Down | 3.80E-05  | 7.60E-05  |
| Unigene19055 | Potri.011G168700.1 | 4.4849  | 11.6771 | -1.3805 | Down | 6.26E-11  | 1.88E-10  |
| Unigene37735 | Potri.009G157500.1 | 2.4194  | 6.2993  | -1.3805 | Down | 3.80E-05  | 7.60E-05  |
| Unigene6596  | Potri.009G130500.1 | 2.4032  | 6.257   | -1.3805 | Down | 5.11E-09  | 1.38E-08  |

|              |                    |         |          |         |      |          |          |
|--------------|--------------------|---------|----------|---------|------|----------|----------|
| Unigene51157 | Potri.009G121000.5 | 1.3584  | 3.5368   | -1.3805 | Down | 3.80E-05 | 7.60E-05 |
| Unigene46887 | Potri.009G065300.3 | 4.5098  | 11.7418  | -1.3805 | Down | 5.11E-09 | 1.38E-08 |
| Unigene42438 | Potri.008G070600.1 | 4.3526  | 11.3326  | -1.3805 | Down | 3.59E-24 | 1.83E-23 |
| Unigene93852 | Potri.006G263000.1 | 1.3584  | 3.5368   | -1.3805 | Down | 3.80E-05 | 7.60E-05 |
| Unigene79954 | Potri.005G094700.2 | 5.4808  | 14.2698  | -1.3805 | Down | 4.29E-07 | 1.02E-06 |
| Unigene50062 | Potri.003G221400.1 | 14.702  | 38.2786  | -1.3805 | Down | 1.89E-35 | 1.32E-34 |
| Unigene16476 | Potri.002G127500.2 | 9.564   | 24.9011  | -1.3805 | Down | 6.26E-11 | 1.88E-10 |
| Unigene13435 | Potri.002G078000.2 | 5.7331  | 14.927   | -1.3805 | Down | 6.18E-28 | 3.54E-27 |
| Unigene33840 | Potri.002G049900.9 | 26.5659 | 69.1677  | -1.3805 | Down | 1.47E-63 | 1.86E-62 |
| Unigene37339 | Potri.002G011000.1 | 8.2127  | 21.383   | -1.3805 | Down | 5.11E-09 | 1.38E-08 |
| Unigene20206 | Potri.001G473100.1 | 2.746   | 7.1495   | -1.3805 | Down | 5.11E-09 | 1.38E-08 |
| Unigene16759 | Potri.001G356800.1 | 21.6229 | 56.2981  | -1.3805 | Down | 2.11E-20 | 9.51E-20 |
| Unigene88909 | Potri.001G068500.1 | 3.9034  | 10.1631  | -1.3805 | Down | 4.29E-07 | 1.02E-06 |
| Unigene1769  | Potri.005G119500.1 | 19.5163 | 50.8201  | -1.3807 | Down | 3.46E-42 | 2.86E-41 |
| Unigene76074 | Potri.002G055700.3 | 41.1294 | 107.1007 | -1.3807 | Down | 2.60E-40 | 2.05E-39 |
| Unigene32468 | Potri.011G033000.1 | 11.8502 | 30.8617  | -1.3809 | Down | 3.92E-63 | 4.92E-62 |
| Unigene50259 | Potri.014G196700.2 | 8.5375  | 22.2358  | -1.381  | Down | 6.50E-34 | 4.38E-33 |
| Unigene43445 | Potri.006G263400.1 | 9.459   | 24.6364  | -1.381  | Down | 4.91E-32 | 3.15E-31 |
| Unigene14110 | Potri.002G188400.1 | 13.4045 | 34.9109  | -1.381  | Down | 1.25E-19 | 5.48E-19 |
| Unigene7975  | Potri.006G226700.2 | 16.0937 | 41.9191  | -1.3811 | Down | 7.06E-55 | 7.60E-54 |
| Unigene11214 | Potri.004G223600.2 | 2.6343  | 6.8613   | -1.3811 | Down | 3.71E-30 | 2.26E-29 |
| Unigene1040  | Potri.015G042500.1 | 5.0892  | 13.2563  | -1.3812 | Down | 8.33E-76 | 1.28E-74 |
| Unigene9763  | Potri.010G098200.2 | 10.7151 | 27.9105  | -1.3812 | Down | 5.91E-14 | 2.06E-13 |
| Unigene44052 | Potri.002G177600.3 | 22.3131 | 58.125   | -1.3813 | Down | 3.81E-33 | 2.52E-32 |
| Unigene16679 | Potri.010G002900.4 | 24.1718 | 62.9718  | -1.3814 | Down | 5.22E-38 | 3.91E-37 |
| Unigene15298 | Potri.001G111000.4 | 4.2125  | 10.9746  | -1.3814 | Down | 3.78E-10 | 1.09E-09 |
| Unigene38326 | Potri.001G035200.1 | 14.447  | 37.6383  | -1.3814 | Down | 1.66E-27 | 9.35E-27 |
| Unigene94597 | Potri.017G130500.1 | 9.2267  | 24.0406  | -1.3816 | Down | 9.62E-24 | 4.84E-23 |
| Unigene33114 | Potri.005G067300.1 | 18.9998 | 49.5043  | -1.3816 | Down | 3.56E-61 | 4.32E-60 |
| Unigene25355 | Potri.002G108000.2 | 54.6591 | 142.4174 | -1.3816 | Down | 1.29E-74 | 1.95E-73 |
| Unigene3583  | Potri.016G088200.1 | 7.6013  | 19.8069  | -1.3817 | Down | 3.12E-08 | 8.00E-08 |
| Unigene10582 | Potri.014G138400.1 | 13.4216 | 34.9729  | -1.3817 | Down | 1.28E-28 | 7.48E-28 |
| Unigene82830 | Potri.011G158700.1 | 6.0753  | 15.8305  | -1.3817 | Down | 3.12E-08 | 8.00E-08 |
| Unigene44262 | Potri.008G143000.1 | 2.9979  | 7.8117   | -1.3817 | Down | 3.12E-08 | 8.00E-08 |
| Unigene5100  | Potri.002G063500.1 | 7.2247  | 18.8255  | -1.3817 | Down | 3.12E-08 | 8.00E-08 |
| Unigene5458  | Potri.001G286600.1 | 6.0296  | 15.7115  | -1.3817 | Down | 3.12E-08 | 8.00E-08 |
| Unigene50351 | Potri.001G002400.1 | 3.2866  | 8.5641   | -1.3817 | Down | 3.12E-08 | 8.00E-08 |
| Unigene41816 | Potri.009G052600.1 | 12.7978 | 33.3502  | -1.3818 | Down | 5.67E-20 | 2.52E-19 |
| Unigene40208 | Potri.019G132300.1 | 13.9128 | 36.2595  | -1.3819 | Down | 1.35E-34 | 9.27E-34 |

|               |                    |         |         |         |      |          |          |
|---------------|--------------------|---------|---------|---------|------|----------|----------|
| Unigene11756  | Potri.007G041300.1 | 2.9514  | 7.6918  | -1.3819 | Down | 4.38E-18 | 1.82E-17 |
| Unigene85324  | Potri.003G098800.2 | 13.5988 | 35.4411 | -1.3819 | Down | 4.38E-18 | 1.82E-17 |
| Unigene43156  | Potri.009G165400.1 | 7.2599  | 18.9217 | -1.382  | Down | 7.55E-28 | 4.31E-27 |
| Unigene22065  | Potri.006G211700.1 | 9.3967  | 24.4913 | -1.382  | Down | 1.40E-37 | 1.03E-36 |
| Unigene91721  | Potri.010G034800.3 | 10.6081 | 27.6504 | -1.3821 | Down | 4.35E-21 | 2.01E-20 |
| Unigene102082 | Potri.009G063800.1 | 1.9598  | 5.1083  | -1.3821 | Down | 2.66E-06 | 5.92E-06 |
| Unigene117291 | Potri.003G196300.2 | 13.0654 | 34.0553 | -1.3821 | Down | 4.35E-21 | 2.01E-20 |
| Unigene107484 | Potri.003G133000.1 | 5.7527  | 14.9945 | -1.3821 | Down | 2.66E-06 | 5.92E-06 |
| Unigene35350  | Potri.001G258900.2 | 23.7919 | 62.0142 | -1.3821 | Down | 5.74E-26 | 3.09E-25 |
| Unigene45741  | Potri.013G020300.1 | 15.9072 | 41.4656 | -1.3822 | Down | 5.85E-29 | 3.45E-28 |
| Unigene46402  | Potri.T147600.2    | 11.8598 | 30.9192 | -1.3824 | Down | 3.35E-22 | 1.60E-21 |
| Unigene478    | Potri.001G459900.2 | 7.6458  | 19.9324 | -1.3824 | Down | 2.50E-98 | 5.25E-97 |
| Unigene36803  | Potri.001G199600.5 | 12.2318 | 31.8879 | -1.3824 | Down | 2.67E-14 | 9.44E-14 |
| Unigene45532  | Potri.016G014500.1 | 2.4669  | 6.4318  | -1.3825 | Down | 2.29E-09 | 6.31E-09 |
| Unigene7919   | Potri.009G038200.1 | 5.9489  | 15.5101 | -1.3825 | Down | 4.65E-33 | 3.07E-32 |
| Unigene1987   | Potri.005G117300.1 | 18.0399 | 47.0326 | -1.3825 | Down | 9.17E-46 | 8.19E-45 |
| Unigene45703  | Potri.015G000400.1 | 6.8951  | 17.9786 | -1.3826 | Down | 3.52E-31 | 2.21E-30 |
| Unigene24769  | Potri.003G073100.2 | 17.7494 | 46.2823 | -1.3827 | Down | 2.58E-23 | 1.28E-22 |
| Unigene31898  | Potri.009G062600.3 | 5.6077  | 14.6232 | -1.3828 | Down | 4.02E-43 | 3.39E-42 |
| Unigene5582   | Potri.008G171600.2 | 5.7931  | 15.1105 | -1.3831 | Down | 1.70E-10 | 4.99E-10 |
| Unigene15029  | Potri.008G149900.2 | 14.6122 | 38.1138 | -1.3831 | Down | 1.52E-19 | 6.68E-19 |
| Unigene30434  | Potri.008G100200.1 | 1.9523  | 5.0923  | -1.3831 | Down | 2.44E-04 | 4.49E-04 |
| Unigene9776   | Potri.007G070100.1 | 7.5393  | 19.6651 | -1.3831 | Down | 1.70E-10 | 4.99E-10 |
| Unigene62491  | Potri.007G023900.1 | 8.4873  | 22.138  | -1.3831 | Down | 1.54E-25 | 8.18E-25 |
| Unigene5246   | Potri.005G083200.5 | 9.0279  | 23.548  | -1.3831 | Down | 1.60E-13 | 5.45E-13 |
| Unigene35378  | Potri.002G127300.1 | 2.6543  | 6.9233  | -1.3831 | Down | 2.44E-04 | 4.49E-04 |
| Unigene78395  | Potri.T133400.2    | 3.0029  | 7.8327  | -1.3832 | Down | 2.44E-04 | 4.49E-04 |
| Unigene85765  | Potri.012G094800.1 | 2.4187  | 6.3089  | -1.3832 | Down | 2.44E-04 | 4.49E-04 |
| Unigene41225  | Potri.007G119300.1 | 2.6345  | 6.8718  | -1.3832 | Down | 2.44E-04 | 4.49E-04 |
| Unigene31652  | Potri.007G042700.1 | 2.1475  | 5.6016  | -1.3832 | Down | 2.44E-04 | 4.49E-04 |
| Unigene101104 | Potri.005G250000.4 | 1.4404  | 3.7572  | -1.3832 | Down | 2.44E-04 | 4.49E-04 |
| Unigene52776  | Potri.003G096700.6 | 1.6954  | 4.4223  | -1.3832 | Down | 2.44E-04 | 4.49E-04 |
| Unigene8343   | Potri.010G071200.4 | 22.8382 | 59.5819 | -1.3834 | Down | 1.06E-87 | 1.92E-86 |
| Unigene105818 | Potri.018G086600.3 | 1.8126  | 4.7291  | -1.3835 | Down | 1.21E-14 | 4.34E-14 |
| Unigene5720   | Potri.001G175200.2 | 14.7774 | 38.5548 | -1.3835 | Down | 9.21E-28 | 5.24E-27 |
| Unigene5935   | Potri.018G066300.2 | 6.9193  | 18.0542 | -1.3836 | Down | 1.27E-11 | 3.96E-11 |
| Unigene31893  | Potri.016G032100.1 | 4.8956  | 12.7732 | -1.3836 | Down | 9.07E-25 | 4.71E-24 |
| Unigene39445  | Potri.002G237200.1 | 26.7388 | 69.7673 | -1.3836 | Down | 4.27E-95 | 8.56E-94 |
| Unigene43305  | Potri.013G073200.6 | 16.391  | 42.7695 | -1.3837 | Down | 4.17E-66 | 5.52E-65 |

|               |                    |         |          |         |      |           |           |
|---------------|--------------------|---------|----------|---------|------|-----------|-----------|
| Unigene30718  | Potri.002G088900.1 | 6.6979  | 17.4776  | -1.3837 | Down | 9.03E-19  | 3.84E-18  |
| Unigene44056  | Potri.012G010800.1 | 7.9174  | 20.6613  | -1.3838 | Down | 6.93E-23  | 3.39E-22  |
| Unigene98340  | Potri.010G180500.1 | 3.384   | 8.831    | -1.3838 | Down | 1.40E-08  | 3.66E-08  |
| Unigene10171  | Potri.008G116600.1 | 4.0641  | 10.6058  | -1.3838 | Down | 1.40E-08  | 3.66E-08  |
| Unigene90420  | Potri.003G005900.2 | 19.4309 | 50.7049  | -1.3838 | Down | 5.68E-33  | 3.74E-32  |
| Unigene31640  | Potri.002G205800.1 | 4.1039  | 10.7095  | -1.3838 | Down | 1.40E-08  | 3.66E-08  |
| Unigene107755 | Potri.002G195700.1 | 16.5367 | 43.1546  | -1.3838 | Down | 9.19E-16  | 3.46E-15  |
| Unigene10803  | Potri.001G031400.2 | 10.7305 | 28.0043  | -1.3839 | Down | 3.53E-139 | 1.15E-137 |
| Unigene19862  | Potri.015G106000.3 | 9.5261  | 24.8628  | -1.384  | Down | 9.56E-13  | 3.15E-12  |
| Unigene68506  | Potri.009G098000.1 | 7.481   | 19.525   | -1.384  | Down | 9.56E-13  | 3.15E-12  |
| Unigene50828  | Potri.001G068900.1 | 7.0665  | 18.4444  | -1.3841 | Down | 7.01E-17  | 2.77E-16  |
| Unigene43608  | Potri.004G190900.2 | 12.3159 | 32.1482  | -1.3842 | Down | 3.25E-29  | 1.93E-28  |
| Unigene7760   | Potri.003G053800.2 | 6.2764  | 16.3832  | -1.3842 | Down | 3.25E-29  | 1.93E-28  |
| Unigene24721  | Potri.016G126000.3 | 1.5977  | 4.1708   | -1.3843 | Down | 1.67E-05  | 3.45E-05  |
| Unigene33357  | Potri.016G014000.1 | 4.2911  | 11.2021  | -1.3843 | Down | 1.03E-09  | 2.89E-09  |
| Unigene110937 | Potri.003G131600.1 | 4.2722  | 11.1527  | -1.3843 | Down | 1.67E-05  | 3.45E-05  |
| Unigene34895  | Potri.002G140200.1 | 9.4679  | 24.7151  | -1.3843 | Down | 1.03E-105 | 2.35E-104 |
| Unigene46452  | Potri.001G225000.2 | 4.4283  | 11.5601  | -1.3843 | Down | 1.67E-05  | 3.45E-05  |
| Unigene14676  | Potri.016G084000.3 | 43.8416 | 114.4542 | -1.3844 | Down | 2.59E-72  | 3.77E-71  |
| Unigene39229  | Potri.006G267800.2 | 3.6096  | 9.4231   | -1.3844 | Down | 7.22E-14  | 2.51E-13  |
| Unigene34103  | Potri.014G024200.4 | 12.1038 | 31.6026  | -1.3846 | Down | 1.52E-32  | 9.89E-32  |
| Unigene39868  | Potri.009G139500.3 | 10.3506 | 27.0246  | -1.3846 | Down | 4.10E-19  | 1.77E-18  |
| Unigene49610  | Potri.016G090800.2 | 17.2705 | 45.0953  | -1.3847 | Down | 2.43E-24  | 1.25E-23  |
| Unigene333    | Potri.013G128100.1 | 5.1659  | 13.4894  | -1.3847 | Down | 7.66E-11  | 2.29E-10  |
| Unigene24932  | Potri.006G146800.3 | 19.7075 | 51.4611  | -1.3847 | Down | 1.48E-29  | 8.88E-29  |
| Unigene19797  | Potri.002G263200.1 | 10.3318 | 26.9788  | -1.3847 | Down | 7.66E-11  | 2.29E-10  |
| Unigene39213  | Potri.013G009100.1 | 9.1346  | 23.8576  | -1.385  | Down | 1.86E-22  | 8.97E-22  |
| Unigene28238  | Potri.002G091400.1 | 7.5514  | 19.7228  | -1.385  | Down | 5.74E-12  | 1.82E-11  |
| Unigene2495   | Potri.017G137300.1 | 26.4096 | 68.9893  | -1.3853 | Down | 1.65E-65  | 2.17E-64  |
| Unigene1436   | Potri.017G090300.4 | 59.8179 | 156.262  | -1.3853 | Down | 2.80E-83  | 4.80E-82  |
| Unigene22827  | Potri.011G107900.3 | 39.21   | 102.4233 | -1.3853 | Down | 1.37E-69  | 1.91E-68  |
| Unigene74037  | Potri.001G244300.1 | 32.4192 | 84.6894  | -1.3853 | Down | 5.24E-31  | 3.27E-30  |
| Unigene34874  | Potri.001G100300.1 | 39.2721 | 102.5882 | -1.3853 | Down | 4.06E-105 | 9.20E-104 |
| Unigene11546  | Potri.019G027800.1 | 12.7747 | 33.3742  | -1.3854 | Down | 5.48E-94  | 1.08E-92  |
| Unigene360    | Potri.009G088600.1 | 11.6647 | 30.4725  | -1.3854 | Down | 3.97E-55  | 4.30E-54  |
| Unigene22033  | Potri.008G150500.2 | 4.988   | 13.0305  | -1.3854 | Down | 1.86E-19  | 8.12E-19  |
| Unigene2195   | Potri.006G107300.3 | 25.8655 | 67.5733  | -1.3854 | Down | 1.97E-38  | 1.49E-37  |
| Unigene13251  | Potri.006G092900.1 | 9.9097  | 25.889   | -1.3854 | Down | 1.97E-38  | 1.49E-37  |
| Unigene36143  | Potri.014G098400.4 | 2.5993  | 6.7909   | -1.3855 | Down | 8.55E-08  | 2.13E-07  |

|               |                    |         |          |         |      |           |           |
|---------------|--------------------|---------|----------|---------|------|-----------|-----------|
| Unigene48820  | Potri.010G216100.3 | 3.0449  | 7.955    | -1.3855 | Down | 8.55E-08  | 2.13E-07  |
| Unigene24201  | Potri.006G063200.1 | 4.5837  | 11.9753  | -1.3855 | Down | 3.27E-14  | 1.15E-13  |
| Unigene2234   | Potri.005G170500.3 | 2.0327  | 5.3106   | -1.3855 | Down | 8.55E-08  | 2.13E-07  |
| Unigene31195  | Potri.017G090100.5 | 32.6693 | 85.3589  | -1.3856 | Down | 9.35E-42  | 7.64E-41  |
| Unigene23827  | Potri.010G020700.1 | 13.9832 | 36.5353  | -1.3856 | Down | 4.64E-68  | 6.33E-67  |
| Unigene28242  | Potri.014G195700.1 | 10.3346 | 27.0034  | -1.3857 | Down | 2.48E-15  | 9.16E-15  |
| Unigene48897  | Potri.006G199000.2 | 8.0323  | 20.9878  | -1.3857 | Down | 2.48E-15  | 9.16E-15  |
| Unigene45273  | Potri.012G069100.1 | 15.8292 | 41.3645  | -1.3858 | Down | 2.39E-31  | 1.51E-30  |
| Unigene84552  | Potri.015G147500.2 | 50.3544 | 131.6065 | -1.386  | Down | 2.44E-61  | 2.97E-60  |
| Unigene20954  | Potri.015G006500.1 | 6.5823  | 17.2035  | -1.386  | Down | 4.63E-10  | 1.33E-09  |
| Unigene37923  | Potri.011G070900.2 | 26.4154 | 69.0395  | -1.386  | Down | 8.71E-36  | 6.17E-35  |
| Unigene65177  | Potri.006G254400.1 | 3.8884  | 10.1627  | -1.386  | Down | 4.63E-10  | 1.33E-09  |
| Unigene33237  | Potri.011G096100.1 | 10.6703 | 27.8897  | -1.3861 | Down | 8.45E-20  | 3.74E-19  |
| Unigene33350  | Potri.014G135400.1 | 25.5935 | 66.897   | -1.3862 | Down | 2.97E-57  | 3.35E-56  |
| Unigene2270   | Potri.019G062500.7 | 2.0455  | 5.3472   | -1.3863 | Down | 2.59E-12  | 8.35E-12  |
| Unigene88538  | Potri.018G088000.1 | 64.2443 | 167.9382 | -1.3863 | Down | 1.04E-92  | 2.01E-91  |
| Unigene71745  | Potri.011G047900.1 | 12.4332 | 32.5027  | -1.3864 | Down | 2.59E-12  | 8.35E-12  |
| Unigene40672  | Potri.010G087800.1 | 10.7931 | 28.2151  | -1.3864 | Down | 2.59E-12  | 8.35E-12  |
| Unigene43110  | Potri.002G151800.1 | 7.2343  | 18.9128  | -1.3864 | Down | 3.97E-36  | 2.84E-35  |
| Unigene111701 | Potri.007G065300.1 | 11.9041 | 31.1222  | -1.3865 | Down | 1.95E-13  | 6.64E-13  |
| Unigene1008   | Potri.004G086100.1 | 4.6094  | 12.0514  | -1.3865 | Down | 1.88E-39  | 1.45E-38  |
| Unigene11603  | Potri.001G029800.1 | 8.2765  | 21.6382  | -1.3865 | Down | 2.29E-25  | 1.21E-24  |
| Unigene32728  | Potri.001G461200.1 | 8.5435  | 22.3376  | -1.3866 | Down | 1.37E-27  | 7.77E-27  |
| Unigene14808  | Potri.018G086200.1 | 15.5685 | 40.7094  | -1.3867 | Down | 8.56E-17  | 3.37E-16  |
| Unigene22663  | Potri.008G172800.1 | 12.0768 | 31.5789  | -1.3867 | Down | 4.96E-32  | 3.18E-31  |
| Unigene7552   | Potri.013G007800.5 | 13.4351 | 35.1314  | -1.3868 | Down | 2.58E-48  | 2.43E-47  |
| Unigene76928  | Potri.004G202500.1 | 16.8502 | 44.0627  | -1.3868 | Down | 6.54E-18  | 2.69E-17  |
| Unigene8180   | Potri.001G438300.1 | 8.6724  | 22.6779  | -1.3868 | Down | 6.54E-18  | 2.69E-17  |
| Unigene6343   | Potri.009G120200.1 | 17.3878 | 45.4727  | -1.3869 | Down | 2.95E-21  | 1.37E-20  |
| Unigene43749  | Potri.014G087900.1 | 8.2951  | 21.6951  | -1.387  | Down | 1.35E-24  | 6.98E-24  |
| Unigene5947   | Potri.001G163900.1 | 14.2849 | 37.3637  | -1.3871 | Down | 3.75E-30  | 2.29E-29  |
| Unigene10847  | Potri.011G125800.3 | 10.7575 | 28.141   | -1.3873 | Down | 4.21E-50  | 4.12E-49  |
| Unigene3317   | Potri.003G035200.1 | 21.1603 | 55.36    | -1.3875 | Down | 2.90E-104 | 6.53E-103 |
| Unigene89104  | Potri.019G084100.1 | 4.5017  | 11.7784  | -1.3876 | Down | 3.82E-08  | 9.76E-08  |
| Unigene19535  | Potri.019G062600.1 | 19.0203 | 49.7658  | -1.3876 | Down | 4.75E-26  | 2.57E-25  |
| Unigene9852   | Potri.017G118500.1 | 2.9783  | 7.7926   | -1.3876 | Down | 3.82E-08  | 9.76E-08  |
| Unigene36595  | Potri.016G091200.2 | 4.1118  | 10.7582  | -1.3876 | Down | 7.40E-06  | 1.59E-05  |
| Unigene2800   | Potri.015G096000.1 | 5.4755  | 14.3265  | -1.3876 | Down | 1.03E-22  | 5.02E-22  |
| Unigene49067  | Potri.014G082900.1 | 2.2557  | 5.9019   | -1.3876 | Down | 7.40E-06  | 1.59E-05  |



|               |                    |         |          |         |      |           |           |
|---------------|--------------------|---------|----------|---------|------|-----------|-----------|
| Unigene12234  | Potri.012G122400.2 | 2.4985  | 6.5373   | -1.3876 | Down | 3.82E-08  | 9.76E-08  |
| Unigene64018  | Potri.010G212100.4 | 2.9783  | 7.7926   | -1.3876 | Down | 1.07E-04  | 2.04E-04  |
| Unigene102784 | Potri.010G148400.2 | 3.4946  | 9.1435   | -1.3876 | Down | 2.81E-09  | 7.69E-09  |
| Unigene26528  | Potri.010G078500.1 | 13.0048 | 34.0266  | -1.3876 | Down | 5.09E-16  | 1.94E-15  |
| Unigene19540  | Potri.009G036800.1 | 2.314   | 6.0545   | -1.3876 | Down | 3.82E-08  | 9.76E-08  |
| Unigene31409  | Potri.008G125000.1 | 2.6463  | 6.9238   | -1.3876 | Down | 1.07E-04  | 2.04E-04  |
| Unigene17973  | Potri.008G049500.1 | 2.2508  | 5.8892   | -1.3876 | Down | 7.40E-06  | 1.59E-05  |
| Unigene47963  | Potri.008G028800.4 | 2.8797  | 7.5347   | -1.3876 | Down | 1.07E-04  | 2.04E-04  |
| Unigene28906  | Potri.006G116200.3 | 5.2158  | 13.6469  | -1.3876 | Down | 1.74E-20  | 7.89E-20  |
| Unigene76829  | Potri.005G231700.1 | 5.7258  | 14.9813  | -1.3876 | Down | 5.27E-07  | 1.24E-06  |
| Unigene4651   | Potri.001G198500.1 | 3.2946  | 8.6202   | -1.3876 | Down | 7.40E-06  | 1.59E-05  |
| Unigene12053  | Potri.017G055600.1 | 1.7918  | 4.6883   | -1.3877 | Down | 2.81E-09  | 7.69E-09  |
| Unigene96009  | Potri.004G059000.2 | 100.818 | 263.81   | -1.3877 | Down | 7.73E-104 | 1.73E-102 |
| Unigene5717   | Potri.013G012500.2 | 29.4852 | 77.1591  | -1.3878 | Down | 1.23E-59  | 1.46E-58  |
| Unigene27817  | Potri.016G035500.1 | 21.6819 | 56.7426  | -1.3879 | Down | 4.95E-43  | 4.16E-42  |
| Unigene18427  | Potri.004G106500.4 | 11.7171 | 30.6649  | -1.388  | Down | 1.04E-39  | 8.12E-39  |
| Unigene36160  | Potri.002G257100.1 | 40.843  | 106.8926 | -1.388  | Down | 2.21E-36  | 1.59E-35  |
| Unigene45338  | Potri.015G071900.1 | 18.2304 | 47.7162  | -1.3881 | Down | 2.45E-53  | 2.56E-52  |
| Unigene86758  | Potri.010G166500.4 | 23.2817 | 60.9344  | -1.3881 | Down | 6.05E-32  | 3.88E-31  |
| Unigene109910 | Potri.013G004700.4 | 68.9786 | 180.5582 | -1.3882 | Down | 7.61E-66  | 1.00E-64  |
| Unigene43923  | Potri.006G251600.1 | 22.5569 | 59.0431  | -1.3882 | Down | 2.88E-70  | 4.06E-69  |
| Unigene8716   | Potri.006G009200.1 | 17.0116 | 44.5296  | -1.3882 | Down | 4.70E-23  | 2.31E-22  |
| Unigene33738  | Potri.018G079800.6 | 19.926  | 52.1609  | -1.3883 | Down | 4.76E-40  | 3.74E-39  |
| Unigene13717  | Potri.010G098200.2 | 27.3223 | 71.5231  | -1.3883 | Down | 4.20E-58  | 4.83E-57  |
| Unigene79897  | Potri.006G062800.1 | 38.9742 | 102.0212 | -1.3883 | Down | 2.89E-42  | 2.39E-41  |
| Unigene18927  | Potri.003G224000.1 | 17.6438 | 46.188   | -1.3884 | Down | 7.84E-38  | 5.84E-37  |
| Unigene29435  | Potri.010G208000.1 | 24.6556 | 64.5536  | -1.3886 | Down | 2.45E-57  | 2.78E-56  |
| Unigene34186  | Potri.006G140000.1 | 15.1529 | 39.6736  | -1.3886 | Down | 2.45E-57  | 2.77E-56  |
| Unigene18315  | Potri.003G133000.1 | 20.5166 | 53.7157  | -1.3886 | Down | 7.30E-88  | 1.33E-86  |
| Unigene41735  | Potri.004G227000.1 | 20.6309 | 54.0219  | -1.3887 | Down | 1.27E-25  | 6.79E-25  |
| Unigene70099  | Potri.017G050100.2 | 2.1485  | 5.6259   | -1.3888 | Down | 5.28E-13  | 1.76E-12  |
| Unigene52417  | Potri.008G096700.1 | 18.0644 | 47.3032  | -1.3888 | Down | 5.90E-36  | 4.20E-35  |
| Unigene23208  | Potri.005G076500.2 | 6.6147  | 17.3212  | -1.3888 | Down | 5.28E-13  | 1.76E-12  |
| Unigene964    | Potri.004G042200.1 | 24.1012 | 63.1114  | -1.3888 | Down | 1.42E-81  | 2.38E-80  |
| Unigene8333   | Potri.003G041000.1 | 5.7754  | 15.1235  | -1.3888 | Down | 5.28E-13  | 1.76E-12  |
| Unigene1442   | Potri.001G416100.2 | 5.8129  | 15.2217  | -1.3888 | Down | 5.28E-13  | 1.76E-12  |
| Unigene34179  | Potri.013G132500.3 | 4.1326  | 10.8226  | -1.3889 | Down | 1.26E-32  | 8.20E-32  |
| Unigene20715  | Potri.010G137600.1 | 6.397   | 16.7527  | -1.3889 | Down | 7.02E-12  | 2.22E-11  |
| Unigene23191  | Potri.011G111500.2 | 2.635   | 6.9015   | -1.3891 | Down | 9.38E-11  | 2.79E-10  |

|               |                    |         |          |         |      |           |           |
|---------------|--------------------|---------|----------|---------|------|-----------|-----------|
| Unigene31162  | Potri.008G074800.1 | 5.6192  | 14.7172  | -1.3891 | Down | 9.38E-11  | 2.79E-10  |
| Unigene228    | Potri.014G014400.2 | 13.4251 | 35.1652  | -1.3892 | Down | 5.57E-94  | 1.10E-92  |
| Unigene10127  | Potri.009G018700.1 | 2.5724  | 6.7395   | -1.3895 | Down | 1.71E-08  | 4.47E-08  |
| Unigene6923   | Potri.007G050600.1 | 12.6634 | 33.1776  | -1.3895 | Down | 1.23E-36  | 8.88E-36  |
| Unigene106209 | Potri.003G206000.1 | 1.5057  | 3.9448   | -1.3895 | Down | 1.71E-08  | 4.47E-08  |
| Unigene1895   | Potri.001G138900.1 | 8.8078  | 23.0759  | -1.3895 | Down | 1.26E-22  | 6.11E-22  |
| Unigene1268   | Potri.014G070100.1 | 1.9399  | 5.0825   | -1.3896 | Down | 1.71E-08  | 4.47E-08  |
| Unigene43248  | Potri.006G146600.2 | 4.866   | 12.7491  | -1.3896 | Down | 1.61E-42  | 1.34E-41  |
| Unigene43815  | Potri.001G420900.1 | 1.8586  | 4.8696   | -1.3896 | Down | 1.71E-08  | 4.47E-08  |
| Unigene53826  | Potri.010G206400.1 | 23.5638 | 61.7449  | -1.3897 | Down | 2.61E-33  | 1.74E-32  |
| Unigene27607  | Potri.007G000400.1 | 19.2296 | 50.3877  | -1.3897 | Down | 2.61E-33  | 1.74E-32  |
| Unigene47197  | Potri.006G155400.1 | 3.41    | 8.9351   | -1.3897 | Down | 1.81E-14  | 6.44E-14  |
| Unigene3341   | Potri.005G156500.2 | 20.0295 | 52.4868  | -1.3898 | Down | 1.45E-68  | 2.00E-67  |
| Unigene7986   | Potri.019G056800.1 | 2.7768  | 7.277    | -1.3899 | Down | 2.35E-07  | 5.67E-07  |
| Unigene8456   | Potri.019G055400.1 | 6.1066  | 16.003   | -1.3899 | Down | 2.39E-13  | 8.09E-13  |
| Unigene33405  | Potri.013G021600.2 | 38.1581 | 100.0005 | -1.3899 | Down | 1.24E-128 | 3.63E-127 |
| Unigene28020  | Potri.012G092900.1 | 3.0067  | 7.8795   | -1.3899 | Down | 2.35E-07  | 5.67E-07  |
| Unigene29493  | Potri.009G146000.1 | 4.0002  | 10.4831  | -1.3899 | Down | 2.39E-13  | 8.09E-13  |
| Unigene28213  | Potri.006G142200.1 | 2.8692  | 7.5191   | -1.3899 | Down | 2.35E-07  | 5.67E-07  |
| Unigene7799   | Potri.018G096600.1 | 6.5368  | 17.1319  | -1.39   | Down | 1.21E-40  | 9.62E-40  |
| Unigene155    | Potri.015G026100.1 | 10.3129 | 27.0277  | -1.39   | Down | 3.16E-98  | 6.61E-97  |
| Unigene8171   | Potri.014G135700.2 | 27.9989 | 73.3771  | -1.39   | Down | 1.25E-47  | 1.16E-46  |
| Unigene16991  | Potri.005G204100.1 | 19.2037 | 50.331   | -1.3901 | Down | 9.26E-35  | 6.37E-34  |
| Unigene92666  | Potri.001G015400.2 | 90.5307 | 237.2879 | -1.3902 | Down | 7.16E-192 | 3.55E-190 |
| Unigene13066  | Potri.014G196900.1 | 9.7209  | 25.4842  | -1.3904 | Down | 1.20E-44  | 1.04E-43  |
| Unigene9660   | Potri.014G041200.1 | 7.1273  | 18.6848  | -1.3904 | Down | 4.22E-11  | 1.28E-10  |
| Unigene16685  | Potri.012G142800.2 | 4.6918  | 12.2999  | -1.3904 | Down | 4.22E-11  | 1.28E-10  |
| Unigene20873  | Potri.011G103200.1 | 4.3796  | 11.4815  | -1.3904 | Down | 4.22E-11  | 1.28E-10  |
| Unigene24540  | Potri.008G180700.5 | 7.3349  | 19.2292  | -1.3904 | Down | 1.20E-44  | 1.04E-43  |
| Unigene9624   | Potri.006G271200.1 | 2.0532  | 5.3826   | -1.3904 | Down | 3.28E-06  | 7.24E-06  |
| Unigene7023   | Potri.006G078300.1 | 2.7698  | 7.2612   | -1.3904 | Down | 3.28E-06  | 7.24E-06  |
| Unigene7530   | Potri.004G133600.3 | 5.8357  | 15.2987  | -1.3904 | Down | 9.68E-21  | 4.41E-20  |
| Unigene29970  | Potri.002G217000.1 | 6.9395  | 18.1924  | -1.3904 | Down | 7.08E-40  | 5.53E-39  |
| Unigene15450  | Potri.001G087800.1 | 16.062  | 42.1079  | -1.3904 | Down | 6.22E-16  | 2.36E-15  |
| Unigene23443  | Potri.016G089200.1 | 2.2836  | 5.9868   | -1.3905 | Down | 3.28E-06  | 7.24E-06  |
| Unigene99945  | Potri.005G017400.1 | 2.076   | 5.4425   | -1.3905 | Down | 3.28E-06  | 7.24E-06  |
| Unigene18696  | Potri.003G067500.1 | 18.1058 | 47.4688  | -1.3905 | Down | 9.08E-39  | 6.91E-38  |
| Unigene47815  | Potri.006G165700.1 | 23.1405 | 60.6762  | -1.3907 | Down | 1.50E-36  | 1.08E-35  |
| Unigene11557  | Potri.005G200000.2 | 15.2025 | 39.8622  | -1.3907 | Down | 3.48E-58  | 4.00E-57  |

|               |                    |         |          |         |      |           |           |
|---------------|--------------------|---------|----------|---------|------|-----------|-----------|
| Unigene76856  | Potri.002G237500.1 | 49.4055 | 129.5444 | -1.3907 | Down | 9.28E-50  | 9.02E-49  |
| Unigene6320   | Potri.009G025700.1 | 8.9048  | 23.3509  | -1.3908 | Down | 5.67E-10  | 1.62E-09  |
| Unigene47416  | Potri.014G032900.3 | 18.0316 | 47.2898  | -1.391  | Down | 1.49E-29  | 8.96E-29  |
| Unigene52415  | Potri.017G057800.1 | 2.4866  | 6.5228   | -1.3913 | Down | 4.68E-05  | 9.29E-05  |
| Unigene21483  | Potri.007G059000.1 | 19.9751 | 52.3989  | -1.3913 | Down | 6.23E-136 | 1.96E-134 |
| Unigene113149 | Potri.005G194700.2 | 3.4179  | 8.9656   | -1.3913 | Down | 4.68E-05  | 9.29E-05  |
| Unigene27502  | Potri.004G141400.3 | 6.5739  | 17.2442  | -1.3913 | Down | 7.67E-09  | 2.04E-08  |
| Unigene65412  | Potri.002G189900.1 | 1.2326  | 3.2333   | -1.3913 | Down | 4.68E-05  | 9.29E-05  |
| Unigene53788  | Potri.002G169800.1 | 11.8739 | 31.147   | -1.3913 | Down | 2.82E-16  | 1.08E-15  |
| Unigene21127  | Potri.001G230000.1 | 31.8645 | 83.5852  | -1.3913 | Down | 2.48E-49  | 2.38E-48  |
| Unigene47394  | Potri.001G163300.1 | 6.9185  | 18.1482  | -1.3913 | Down | 7.67E-09  | 2.04E-08  |
| Unigene6825   | Potri.003G060900.1 | 16.0451 | 42.0934  | -1.3915 | Down | 3.22E-26  | 1.75E-25  |
| Unigene32809  | Potri.001G254300.1 | 7.0075  | 18.3847  | -1.3915 | Down | 5.41E-57  | 6.08E-56  |
| Unigene22730  | Potri.014G169600.2 | 6.7457  | 17.6986  | -1.3916 | Down | 3.70E-15  | 1.36E-14  |
| Unigene39101  | Potri.016G023800.2 | 7.7734  | 20.3965  | -1.3917 | Down | 2.00E-21  | 9.32E-21  |
| Unigene74308  | Potri.014G053500.2 | 10.7561 | 28.2231  | -1.3917 | Down | 1.90E-11  | 5.88E-11  |
| Unigene44577  | Potri.006G199900.1 | 5.8407  | 15.3265  | -1.3918 | Down | 9.75E-18  | 3.99E-17  |
| Unigene47248  | Potri.011G065000.1 | 7.0616  | 18.532   | -1.392  | Down | 1.05E-07  | 2.59E-07  |
| Unigene12071  | Potri.009G139500.3 | 18.2127 | 47.7984  | -1.392  | Down | 1.40E-41  | 1.14E-40  |
| Unigene33975  | Potri.001G261700.1 | 10.8829 | 28.5606  | -1.392  | Down | 2.60E-20  | 1.17E-19  |
| Unigene18641  | Potri.006G273300.1 | 16.4344 | 43.1362  | -1.3922 | Down | 3.02E-34  | 2.05E-33  |
| Unigene309    | Potri.006G081800.3 | 24.7801 | 65.0432  | -1.3922 | Down | 4.39E-78  | 7.00E-77  |
| Unigene86043  | Potri.003G031900.1 | 41.4439 | 108.7842 | -1.3922 | Down | 2.35E-54  | 2.51E-53  |
| Unigene21650  | Potri.006G020900.1 | 35.5807 | 93.3951  | -1.3923 | Down | 1.09E-100 | 2.36E-99  |
| Unigene44224  | Potri.001G111700.2 | 24.351  | 63.9215  | -1.3923 | Down | 5.18E-62  | 6.38E-61  |
| Unigene67352  | Potri.001G107200.1 | 4.7234  | 12.3989  | -1.3923 | Down | 9.08E-22  | 4.28E-21  |
| Unigene99     | Potri.016G002700.2 | 30.1029 | 79.0467  | -1.3928 | Down | 1.00E-165 | 4.12E-164 |
| Unigene36327  | Potri.013G088600.1 | 27.0246 | 70.9686  | -1.3929 | Down | 2.28E-32  | 1.48E-31  |
| Unigene18755  | Potri.012G111500.1 | 2.291   | 6.0162   | -1.3929 | Down | 1.45E-06  | 3.30E-06  |
| Unigene24703  | Potri.011G132800.1 | 3.2434  | 8.5175   | -1.3929 | Down | 1.45E-06  | 3.30E-06  |
| Unigene33677  | Potri.008G162400.4 | 1.9503  | 5.1216   | -1.3929 | Down | 1.45E-06  | 3.30E-06  |
| Unigene68337  | Potri.006G123300.1 | 2.0162  | 5.2947   | -1.3929 | Down | 1.45E-06  | 3.30E-06  |
| Unigene29301  | Potri.005G059000.3 | 2.5779  | 6.7699   | -1.3929 | Down | 1.45E-06  | 3.30E-06  |
| Unigene21169  | Potri.002G214600.1 | 4.0366  | 10.6004  | -1.3929 | Down | 6.27E-35  | 4.34E-34  |
| Unigene33191  | Potri.016G100500.1 | 15.5047 | 40.7202  | -1.393  | Down | 1.32E-46  | 1.20E-45  |
| Unigene233    | Potri.008G004500.3 | 7.6558  | 20.1065  | -1.393  | Down | 3.68E-49  | 3.53E-48  |
| Unigene42116  | Potri.010G089700.1 | 64.2963 | 168.8728 | -1.3931 | Down | 8.65E-188 | 4.16E-186 |
| Unigene77170  | Potri.004G230800.1 | 60.0036 | 157.5959 | -1.3931 | Down | 8.05E-61  | 9.70E-60  |
| Unigene23424  | Potri.010G082400.1 | 17.503  | 45.9724  | -1.3932 | Down | 4.71E-48  | 4.42E-47  |

|               |                    |         |          |         |      |           |           |
|---------------|--------------------|---------|----------|---------|------|-----------|-----------|
| Unigene31804  | Potri.007G045700.1 | 6.2814  | 16.4995  | -1.3933 | Down | 2.86E-35  | 1.99E-34  |
| Unigene7503   | Potri.005G253400.1 | 4.6559  | 12.2303  | -1.3933 | Down | 7.59E-16  | 2.87E-15  |
| Unigene31837  | Potri.001G344800.1 | 13.2238 | 34.7372  | -1.3933 | Down | 4.25E-96  | 8.63E-95  |
| Unigene119107 | Potri.001G183500.1 | 5.7434  | 15.0868  | -1.3933 | Down | 7.59E-16  | 2.87E-15  |
| Unigene10722  | Potri.011G090100.1 | 12.1393 | 31.8903  | -1.3934 | Down | 8.34E-125 | 2.35E-123 |
| Unigene24169  | Potri.010G046500.1 | 42.7747 | 112.3711 | -1.3934 | Down | 4.12E-201 | 2.16E-199 |
| Unigene72892  | Potri.007G033800.1 | 43.5459 | 114.4029 | -1.3935 | Down | 9.99E-41  | 7.96E-40  |
| Unigene51465  | Potri.001G438600.1 | 18.437  | 48.4362  | -1.3935 | Down | 1.88E-22  | 9.04E-22  |
| Unigene53095  | Potri.018G143900.4 | 9.7081  | 25.5057  | -1.3936 | Down | 1.15E-10  | 3.40E-10  |
| Unigene40659  | Potri.006G152900.1 | 14.4697 | 38.0201  | -1.3937 | Down | 1.72E-30  | 1.06E-29  |
| Unigene29360  | Potri.017G039400.1 | 11.4984 | 30.2144  | -1.3938 | Down | 1.68E-34  | 1.15E-33  |
| Unigene49872  | Potri.016G005400.2 | 2.0892  | 5.4898   | -1.3938 | Down | 4.69E-08  | 1.19E-07  |
| Unigene40644  | Potri.009G014400.1 | 31.0679 | 81.6353  | -1.3938 | Down | 9.78E-57  | 1.09E-55  |
| Unigene29473  | Potri.002G186900.2 | 2.4159  | 6.3484   | -1.3938 | Down | 4.69E-08  | 1.19E-07  |
| Unigene52313  | Potri.010G191800.3 | 34.5021 | 90.6679  | -1.3939 | Down | 1.00E-72  | 1.47E-71  |
| Unigene30671  | Potri.003G204400.1 | 35.3868 | 92.9927  | -1.3939 | Down | 4.48E-49  | 4.29E-48  |
| Unigene41637  | Potri.011G119500.8 | 7.9157  | 20.8033  | -1.394  | Down | 3.87E-12  | 1.24E-11  |
| Unigene28632  | Potri.010G024900.4 | 13.3792 | 35.1621  | -1.394  | Down | 2.16E-33  | 1.44E-32  |
| Unigene24050  | Potri.010G002600.2 | 4.4436  | 11.6784  | -1.394  | Down | 3.87E-12  | 1.24E-11  |
| Unigene17774  | Potri.010G002100.1 | 10.634  | 27.9474  | -1.394  | Down | 8.53E-23  | 4.16E-22  |
| Unigene29994  | Potri.010G027800.1 | 63.2227 | 166.1658 | -1.3941 | Down | 4.11E-110 | 9.93E-109 |
| Unigene11216  | Potri.008G103000.4 | 5.5462  | 14.577   | -1.3941 | Down | 3.44E-16  | 1.32E-15  |
| Unigene18276  | Potri.008G014700.1 | 6.5988  | 17.3447  | -1.3942 | Down | 2.99E-24  | 1.53E-23  |
| Unigene1853   | Potri.006G049300.1 | 30.0697 | 79.0427  | -1.3943 | Down | 2.61E-60  | 3.12E-59  |
| Unigene42737  | Potri.001G221000.2 | 18.273  | 48.0328  | -1.3943 | Down | 8.01E-95  | 1.60E-93  |
| Unigene6463   | Potri.018G093900.1 | 2.4933  | 6.5543   | -1.3944 | Down | 2.06E-05  | 4.23E-05  |
| Unigene54196  | Potri.017G136400.1 | 2.887   | 7.5892   | -1.3944 | Down | 2.06E-05  | 4.23E-05  |
| Unigene2333   | Potri.014G000500.5 | 9.0009  | 23.6612  | -1.3944 | Down | 1.11E-21  | 5.21E-21  |
| Unigene30733  | Potri.006G257000.1 | 2.0494  | 5.3875   | -1.3944 | Down | 2.06E-05  | 4.23E-05  |
| Unigene32337  | Potri.010G232700.3 | 3.3628  | 8.8414   | -1.3946 | Down | 4.13E-19  | 1.78E-18  |
| Unigene11020  | Potri.006G133400.3 | 2.7564  | 7.247    | -1.3946 | Down | 4.13E-19  | 1.78E-18  |
| Unigene71799  | Potri.006G102900.1 | 15.3586 | 40.3822  | -1.3947 | Down | 4.52E-15  | 1.65E-14  |
| Unigene337    | Potri.002G203700.1 | 6.9231  | 18.2033  | -1.3947 | Down | 4.39E-38  | 3.29E-37  |
| Unigene44440  | Potri.012G142200.1 | 32.5223 | 85.5173  | -1.3948 | Down | 1.95E-58  | 2.25E-57  |
| Unigene28726  | Potri.003G217700.1 | 3.1083  | 8.1733   | -1.3948 | Down | 5.17E-11  | 1.56E-10  |
| Unigene43030  | Potri.002G036300.1 | 2.7963  | 7.3528   | -1.3948 | Down | 5.17E-11  | 1.56E-10  |
| Unigene18952  | Potri.002G002400.1 | 4.4638  | 11.7377  | -1.3948 | Down | 5.17E-11  | 1.56E-10  |
| Unigene23108  | Potri.017G092200.1 | 15.5756 | 40.958   | -1.3949 | Down | 4.79E-26  | 2.59E-25  |
| Unigene32740  | Potri.011G053300.1 | 3.0164  | 7.9322   | -1.3949 | Down | 1.56E-16  | 6.07E-16  |

|               |                    |         |         |         |      |           |           |
|---------------|--------------------|---------|---------|---------|------|-----------|-----------|
| Unigene34200  | Potri.002G262300.1 | 8.8553  | 23.2888 | -1.395  | Down | 2.49E-49  | 2.40E-48  |
| Unigene42583  | Potri.017G018500.1 | 12.0779 | 31.7654 | -1.3951 | Down | 1.75E-12  | 5.68E-12  |
| Unigene116455 | Potri.016G079300.4 | 3.9631  | 10.423  | -1.3951 | Down | 6.47E-07  | 1.51E-06  |
| Unigene50764  | Potri.005G002800.2 | 6.3251  | 16.6353 | -1.3951 | Down | 1.75E-12  | 5.68E-12  |
| Unigene1958   | Potri.001G373100.1 | 2.3398  | 6.1538  | -1.3951 | Down | 6.47E-07  | 1.51E-06  |
| Unigene27254  | Potri.001G182300.1 | 4.5618  | 11.9977 | -1.3951 | Down | 6.47E-07  | 1.51E-06  |
| Unigene31814  | Potri.018G081400.4 | 7.725   | 20.3189 | -1.3952 | Down | 2.46E-78  | 3.93E-77  |
| Unigene27504  | Potri.010G089700.1 | 31.6526 | 83.2522 | -1.3952 | Down | 7.25E-36  | 5.14E-35  |
| Unigene10885  | Potri.017G073200.2 | 21.1465 | 55.6231 | -1.3953 | Down | 8.82E-80  | 1.44E-78  |
| Unigene1557   | Potri.007G092400.1 | 20.2665 | 53.3107 | -1.3953 | Down | 5.19E-58  | 5.95E-57  |
| Unigene20175  | Potri.011G089300.1 | 7.6466  | 20.1166 | -1.3955 | Down | 2.71E-29  | 1.61E-28  |
| Unigene12790  | Potri.004G186300.1 | 1.865   | 4.9063  | -1.3955 | Down | 2.10E-08  | 5.44E-08  |
| Unigene18031  | Potri.010G021600.1 | 5.8089  | 15.2836 | -1.3956 | Down | 7.07E-17  | 2.79E-16  |
| Unigene1132   | Potri.009G120900.1 | 13.3299 | 35.0725 | -1.3957 | Down | 1.81E-72  | 2.64E-71  |
| Unigene6500   | Potri.002G133700.2 | 22.0287 | 57.9612 | -1.3957 | Down | 5.28E-42  | 4.34E-41  |
| Unigene39752  | Potri.002G093900.1 | 3.385   | 8.9067  | -1.3957 | Down | 6.94E-10  | 1.97E-09  |
| Unigene79080  | Potri.001G260900.1 | 8.0816  | 21.2647 | -1.3957 | Down | 6.94E-10  | 1.97E-09  |
| Unigene31855  | Potri.016G105400.1 | 18.8447 | 49.5864 | -1.3958 | Down | 2.32E-164 | 9.43E-163 |
| Unigene86976  | Potri.014G196400.1 | 18.8308 | 49.5487 | -1.3958 | Down | 9.91E-27  | 5.47E-26  |
| Unigene33384  | Potri.011G092700.1 | 11.3758 | 29.9327 | -1.3958 | Down | 4.25E-35  | 2.95E-34  |
| Unigene31958  | Potri.002G052300.1 | 8.5787  | 22.5736 | -1.3958 | Down | 2.30E-71  | 3.31E-70  |
| Unigene50314  | Potri.001G043100.3 | 5.2563  | 13.8307 | -1.3958 | Down | 2.45E-18  | 1.03E-17  |
| Unigene36627  | Potri.002G246800.2 | 20.9694 | 55.1797 | -1.3959 | Down | 8.52E-20  | 3.77E-19  |
| Unigene76634  | Potri.009G152500.1 | 11.5021 | 30.2717 | -1.3961 | Down | 7.90E-13  | 2.61E-12  |
| Unigene7159   | Potri.008G084500.2 | 5.264   | 13.8542 | -1.3961 | Down | 7.90E-13  | 2.61E-12  |
| Unigene41361  | Potri.006G253100.1 | 33.474  | 88.0983 | -1.3961 | Down | 6.32E-58  | 7.23E-57  |
| Unigene10952  | Potri.006G053900.3 | 8.8915  | 23.4013 | -1.3961 | Down | 2.26E-59  | 2.66E-58  |
| Unigene11472  | Potri.005G144700.1 | 5.0156  | 13.2013 | -1.3962 | Down | 4.51E-27  | 2.52E-26  |
| Unigene12517  | Potri.001G259100.7 | 8.8678  | 23.3429 | -1.3963 | Down | 3.20E-17  | 1.28E-16  |
| Unigene34209  | Potri.016G088800.2 | 10.7106 | 28.197  | -1.3965 | Down | 5.01E-43  | 4.21E-42  |
| Unigene47629  | Potri.011G111900.1 | 31.5977 | 83.1859 | -1.3965 | Down | 1.79E-44  | 1.55E-43  |
| Unigene73536  | Potri.015G143300.3 | 26.693  | 70.2765 | -1.3966 | Down | 5.84E-26  | 3.14E-25  |
| Unigene21608  | Potri.010G059200.1 | 9.252   | 24.3581 | -1.3966 | Down | 4.60E-73  | 6.77E-72  |
| Unigene10048  | Potri.004G157400.1 | 8.2508  | 21.7232 | -1.3966 | Down | 7.25E-29  | 4.26E-28  |
| Unigene104302 | Potri.017G115600.1 | 2.4959  | 6.573   | -1.397  | Down | 3.02E-04  | 5.50E-04  |
| Unigene6653   | Potri.017G017900.1 | 2.6063  | 6.8639  | -1.397  | Down | 9.40E-09  | 2.49E-08  |
| Unigene52748  | Potri.016G065000.2 | 3.384   | 8.912   | -1.397  | Down | 9.40E-09  | 2.49E-08  |
| Unigene94844  | Potri.014G052100.1 | 13.5726 | 35.7443 | -1.397  | Down | 2.15E-23  | 1.07E-22  |
| Unigene41299  | Potri.013G071800.1 | 2.3312  | 6.1394  | -1.397  | Down | 3.02E-04  | 5.50E-04  |

|               |                    |         |          |         |      |           |           |
|---------------|--------------------|---------|----------|---------|------|-----------|-----------|
| Unigene6231   | Potri.012G032100.1 | 2.3641  | 6.2259   | -1.397  | Down | 3.02E-04  | 5.50E-04  |
| Unigene11821  | Potri.009G088200.1 | 6.8606  | 18.0678  | -1.397  | Down | 1.04E-43  | 8.91E-43  |
| Unigene12600  | Potri.008G026900.1 | 1.4017  | 3.6913   | -1.397  | Down | 3.02E-04  | 5.50E-04  |
| Unigene81772  | Potri.006G108800.1 | 2.6226  | 6.9068   | -1.397  | Down | 3.02E-04  | 5.50E-04  |
| Unigene53909  | Potri.005G131200.1 | 5.9946  | 15.787   | -1.397  | Down | 1.22E-14  | 4.38E-14  |
| Unigene56385  | Potri.004G233400.3 | 3.639   | 9.5835   | -1.397  | Down | 2.88E-07  | 6.91E-07  |
| Unigene931    | Potri.003G109700.1 | 3.357   | 8.8407   | -1.397  | Down | 4.20E-16  | 1.61E-15  |
| Unigene102878 | Potri.001G218100.2 | 2.3808  | 6.27     | -1.397  | Down | 9.10E-06  | 1.93E-05  |
| Unigene48050  | Potri.001G076200.2 | 2.5922  | 6.8268   | -1.397  | Down | 2.88E-07  | 6.91E-07  |
| Unigene17554  | Potri.005G147700.1 | 1.2911  | 3.4003   | -1.3971 | Down | 3.02E-04  | 5.50E-04  |
| Unigene32036  | Potri.017G094500.1 | 3.2701  | 8.615    | -1.3975 | Down | 2.79E-22  | 1.34E-21  |
| Unigene14058  | Potri.010G136800.3 | 26.9591 | 71.0204  | -1.3975 | Down | 3.44E-25  | 1.81E-24  |
| Unigene112102 | Potri.009G096700.1 | 17.1672 | 45.2294  | -1.3976 | Down | 2.29E-19  | 9.96E-19  |
| Unigene35387  | Potri.004G085500.1 | 5.8115  | 15.3114  | -1.3976 | Down | 2.29E-19  | 9.96E-19  |
| Unigene35628  | Potri.015G092900.2 | 12.3517 | 32.5434  | -1.3977 | Down | 6.59E-18  | 2.71E-17  |
| Unigene53186  | Potri.014G084900.1 | 25.2723 | 66.5926  | -1.3978 | Down | 1.94E-28  | 1.13E-27  |
| Unigene53401  | Potri.016G013300.1 | 4.9554  | 13.0584  | -1.3979 | Down | 1.61E-13  | 5.50E-13  |
| Unigene34903  | Potri.013G017700.1 | 5.6132  | 14.7913  | -1.3979 | Down | 6.19E-39  | 4.73E-38  |
| Unigene42311  | Potri.008G181300.1 | 23.7422 | 62.5668  | -1.3979 | Down | 1.96E-58  | 2.26E-57  |
| Unigene90257  | Potri.006G252500.1 | 30.176  | 79.5177  | -1.3979 | Down | 7.34E-51  | 7.29E-50  |
| Unigene8136   | Potri.017G050400.1 | 9.0033  | 23.7301  | -1.3982 | Down | 1.04E-19  | 4.58E-19  |
| Unigene25526  | Potri.015G075100.1 | 6.3216  | 16.6622  | -1.3982 | Down | 2.07E-45  | 1.83E-44  |
| Unigene87178  | Potri.012G079800.1 | 6.6948  | 17.6454  | -1.3982 | Down | 1.40E-10  | 4.14E-10  |
| Unigene15584  | Potri.010G128500.1 | 35.4563 | 93.454   | -1.3982 | Down | 1.95E-54  | 2.09E-53  |
| Unigene9770   | Potri.006G229300.9 | 78.6766 | 207.3656 | -1.3982 | Down | 9.73E-275 | 7.60E-273 |
| Unigene12161  | Potri.002G160900.4 | 34.2976 | 90.3965  | -1.3982 | Down | 2.33E-75  | 3.57E-74  |
| Unigene42587  | Potri.002G159200.2 | 6.4389  | 16.9709  | -1.3982 | Down | 7.38E-47  | 6.75E-46  |
| Unigene50860  | Potri.014G109900.1 | 9.4131  | 24.8125  | -1.3983 | Down | 1.14E-57  | 1.30E-56  |
| Unigene43901  | Potri.013G123100.2 | 4.4569  | 11.7479  | -1.3983 | Down | 2.99E-18  | 1.25E-17  |
| Unigene76147  | Potri.012G091900.1 | 32.8036 | 86.47    | -1.3983 | Down | 1.78E-33  | 1.19E-32  |
| Unigene22470  | Potri.T044200.3    | 3.1932  | 8.4177   | -1.3984 | Down | 4.21E-09  | 1.14E-08  |
| Unigene18512  | Potri.006G266100.2 | 3.3046  | 8.7112   | -1.3984 | Down | 8.63E-17  | 3.39E-16  |
| Unigene113960 | Potri.002G139700.1 | 18.7921 | 49.5413  | -1.3985 | Down | 5.77E-23  | 2.83E-22  |
| Unigene108778 | Potri.006G201400.1 | 45.2923 | 119.4075 | -1.3986 | Down | 7.44E-43  | 6.23E-42  |
| Unigene34829  | Potri.005G221100.1 | 8.0265  | 21.1608  | -1.3986 | Down | 2.50E-15  | 9.24E-15  |
| Unigene696    | Potri.018G098400.1 | 4.6069  | 12.147   | -1.3987 | Down | 4.72E-20  | 2.10E-19  |
| Unigene51712  | Potri.014G110500.2 | 2.1411  | 5.6454   | -1.3987 | Down | 1.29E-07  | 3.17E-07  |
| Unigene31657  | Potri.013G004400.1 | 4.6933  | 12.3749  | -1.3987 | Down | 1.29E-07  | 3.17E-07  |
| Unigene117465 | Potri.007G059100.1 | 26.4077 | 69.6322  | -1.3988 | Down | 3.39E-43  | 2.86E-42  |

|               |                    |          |          |         |      |           |           |
|---------------|--------------------|----------|----------|---------|------|-----------|-----------|
| Unigene91875  | Potri.008G099700.1 | 74.8517  | 197.3883 | -1.3989 | Down | 5.29E-145 | 1.81E-143 |
| Unigene19032  | Potri.002G140100.5 | 6.9937   | 18.4421  | -1.3989 | Down | 1.36E-18  | 5.73E-18  |
| Unigene90234  | Potri.016G036500.1 | 26.5858  | 70.1104  | -1.399  | Down | 5.52E-45  | 4.84E-44  |
| Unigene74546  | Potri.001G210000.3 | 62.8566  | 165.764  | -1.399  | Down | 1.78E-60  | 2.13E-59  |
| Unigene14505  | Potri.016G016000.1 | 23.8717  | 62.9568  | -1.3991 | Down | 3.20E-48  | 3.02E-47  |
| Unigene15182  | Potri.011G056100.1 | 17.1328  | 45.1843  | -1.3991 | Down | 3.91E-17  | 1.56E-16  |
| Unigene83433  | Potri.003G066000.1 | 26.6227  | 70.2121  | -1.3991 | Down | 1.04E-32  | 6.83E-32  |
| Unigene85503  | Potri.001G215800.4 | 23.5373  | 62.0792  | -1.3992 | Down | 2.95E-31  | 1.86E-30  |
| Unigene76434  | Potri.001G210000.3 | 146.2274 | 385.6713 | -1.3992 | Down | 1.41E-144 | 4.79E-143 |
| Unigene45138  | Potri.019G038700.1 | 3.2581   | 8.5938   | -1.3993 | Down | 4.03E-06  | 8.80E-06  |
| Unigene17422  | Potri.015G110000.1 | 3.5234   | 9.2936   | -1.3993 | Down | 4.03E-06  | 8.80E-06  |
| Unigene7412   | Potri.014G034000.1 | 3.4837   | 9.1889   | -1.3993 | Down | 6.32E-11  | 1.90E-10  |
| Unigene232    | Potri.013G057400.1 | 5.1954   | 13.7039  | -1.3993 | Down | 4.19E-25  | 2.20E-24  |
| Unigene48925  | Potri.011G090200.1 | 6.5557   | 17.2918  | -1.3993 | Down | 6.32E-11  | 1.90E-10  |
| Unigene41813  | Potri.005G099200.2 | 2.2582   | 5.9565   | -1.3993 | Down | 4.03E-06  | 8.80E-06  |
| Unigene35706  | Potri.005G074900.2 | 3.512    | 9.2635   | -1.3993 | Down | 4.03E-06  | 8.80E-06  |
| Unigene57915  | Potri.004G161700.3 | 2.0409   | 5.3833   | -1.3993 | Down | 4.03E-06  | 8.80E-06  |
| Unigene13572  | Potri.002G048300.1 | 7.1495   | 18.8591  | -1.3993 | Down | 4.10E-47  | 3.77E-46  |
| Unigene22547  | Potri.011G033000.1 | 17.7721  | 46.8827  | -1.3994 | Down | 5.58E-41  | 4.48E-40  |
| Unigene32952  | Potri.011G077500.1 | 8.557    | 22.5746  | -1.3995 | Down | 6.71E-27  | 3.72E-26  |
| Unigene27811  | Potri.008G012600.4 | 22.6116  | 59.6532  | -1.3995 | Down | 1.57E-39  | 1.22E-38  |
| Unigene102306 | Potri.004G152100.2 | 3.0986   | 8.1743   | -1.3995 | Down | 6.16E-19  | 2.63E-18  |
| Unigene31531  | Potri.001G306100.1 | 21.3924  | 56.4366  | -1.3995 | Down | 6.71E-27  | 3.72E-26  |
| Unigene2379   | Potri.004G000600.1 | 22.1831  | 58.5234  | -1.3996 | Down | 4.74E-60  | 5.64E-59  |
| Unigene4498   | Potri.003G086700.2 | 14.0983  | 37.1952  | -1.3996 | Down | 3.40E-22  | 1.63E-21  |
| Unigene33281  | Potri.003G104300.1 | 3.1897   | 8.4157   | -1.3997 | Down | 1.77E-17  | 7.18E-17  |
| Unigene8279   | Potri.006G113700.1 | 16.3706  | 43.1951  | -1.3998 | Down | 1.04E-55  | 1.14E-54  |
| Unigene21757  | Potri.006G093600.1 | 3.1642   | 8.349    | -1.3998 | Down | 9.74E-21  | 4.44E-20  |
| Unigene44821  | Potri.006G051200.2 | 6.5005   | 17.1527  | -1.3998 | Down | 6.12E-32  | 3.92E-31  |
| Unigene43471  | Potri.004G048700.2 | 4.8404   | 12.7723  | -1.3998 | Down | 6.12E-32  | 3.92E-31  |
| Unigene72171  | Potri.005G146800.1 | 19.7362  | 52.0847  | -1.4    | Down | 2.79E-19  | 1.21E-18  |
| Unigene6170   | Potri.002G090900.5 | 8.0379   | 21.2116  | -1.4    | Down | 5.13E-16  | 1.95E-15  |
| Unigene52412  | Potri.008G150500.2 | 10.0243  | 26.4553  | -1.4001 | Down | 1.55E-22  | 7.48E-22  |
| Unigene33181  | Potri.005G197900.3 | 13.6093  | 35.9184  | -1.4001 | Down | 2.79E-32  | 1.80E-31  |
| Unigene27996  | Potri.003G197700.2 | 20.5689  | 54.2871  | -1.4001 | Down | 1.60E-35  | 1.12E-34  |
| Unigene21175  | Potri.019G129100.1 | 1.711    | 4.5162   | -1.4003 | Down | 1.32E-04  | 2.50E-04  |
| Unigene28029  | Potri.018G068600.2 | 1.4401   | 3.8013   | -1.4003 | Down | 1.32E-04  | 2.50E-04  |
| Unigene106368 | Potri.015G034100.2 | 1.8239   | 4.8144   | -1.4003 | Down | 5.74E-08  | 1.45E-07  |
| Unigene15445  | Potri.010G062300.1 | 9.7198   | 25.6557  | -1.4003 | Down | 1.49E-14  | 5.33E-14  |

|               |                    |         |         |         |      |           |           |
|---------------|--------------------|---------|---------|---------|------|-----------|-----------|
| Unigene106984 | Potri.009G015300.1 | 1.4457  | 3.816   | -1.4003 | Down | 1.32E-04  | 2.50E-04  |
| Unigene40959  | Potri.008G132200.2 | 1.6802  | 4.4349  | -1.4003 | Down | 1.32E-04  | 2.50E-04  |
| Unigene27514  | Potri.008G065800.1 | 11.2179 | 29.6102 | -1.4003 | Down | 1.49E-14  | 5.33E-14  |
| Unigene48735  | Potri.004G052300.2 | 2.5813  | 6.8134  | -1.4003 | Down | 1.32E-04  | 2.50E-04  |
| Unigene17322  | Potri.003G139900.1 | 1.4627  | 3.8609  | -1.4003 | Down | 1.32E-04  | 2.50E-04  |
| Unigene31735  | Potri.002G023400.2 | 1.7189  | 4.537   | -1.4003 | Down | 1.32E-04  | 2.50E-04  |
| Unigene41490  | Potri.001G409700.1 | 2.5118  | 6.6299  | -1.4003 | Down | 1.32E-04  | 2.50E-04  |
| Unigene23041  | Potri.012G106000.1 | 4.3294  | 11.4302 | -1.4006 | Down | 2.32E-16  | 8.98E-16  |
| Unigene6888   | Potri.019G090600.2 | 3.7594  | 9.9272  | -1.4009 | Down | 8.49E-10  | 2.39E-09  |
| Unigene53380  | Potri.010G139100.2 | 4.5078  | 11.9032 | -1.4009 | Down | 8.49E-10  | 2.39E-09  |
| Unigene8304   | Potri.008G069600.3 | 5.0016  | 13.2072 | -1.4009 | Down | 1.80E-26  | 9.83E-26  |
| Unigene46930  | Potri.001G310900.1 | 15.7647 | 41.6283 | -1.4009 | Down | 1.80E-26  | 9.83E-26  |
| Unigene16043  | Potri.002G222200.4 | 4.6624  | 12.3148 | -1.4012 | Down | 1.79E-06  | 4.04E-06  |
| Unigene42594  | Potri.015G112700.1 | 18.3919 | 48.5803 | -1.4013 | Down | 1.09E-105 | 2.49E-104 |
| Unigene23416  | Potri.006G204500.1 | 1.9631  | 5.1852  | -1.4013 | Down | 1.79E-06  | 4.04E-06  |
| Unigene102300 | Potri.001G324800.1 | 2.7079  | 7.1524  | -1.4013 | Down | 1.79E-06  | 4.04E-06  |
| Unigene75258  | Potri.019G035300.6 | 17.6325 | 46.5783 | -1.4014 | Down | 1.65E-18  | 6.96E-18  |
| Unigene12279  | Potri.015G126500.1 | 16.8974 | 44.6352 | -1.4014 | Down | 1.45E-23  | 7.27E-23  |
| Unigene22823  | Potri.005G014000.2 | 7.6211  | 20.1321 | -1.4014 | Down | 1.65E-18  | 6.97E-18  |
| Unigene88980  | Potri.003G156200.1 | 38.4888 | 101.686 | -1.4016 | Down | 1.87E-59  | 2.20E-58  |
| Unigene46862  | Potri.001G148400.3 | 15.2649 | 40.3282 | -1.4016 | Down | 2.61E-20  | 1.18E-19  |
| Unigene21857  | Potri.010G169300.1 | 2.2158  | 5.8544  | -1.4017 | Down | 2.57E-08  | 6.62E-08  |
| Unigene104285 | Potri.007G063900.2 | 4.2803  | 11.309  | -1.4017 | Down | 2.57E-08  | 6.62E-08  |
| Unigene8601   | Potri.005G186700.1 | 29.8396 | 78.8395 | -1.4017 | Down | 1.34E-42  | 1.12E-41  |
| Unigene27386  | Potri.015G008100.1 | 11.7961 | 31.1684 | -1.4018 | Down | 9.61E-31  | 5.96E-30  |
| Unigene18068  | Potri.014G134400.5 | 2.9418  | 7.7739  | -1.4019 | Down | 3.82E-10  | 1.10E-09  |
| Unigene42472  | Potri.008G215700.1 | 3.417   | 9.0291  | -1.4019 | Down | 1.55E-32  | 1.01E-31  |
| Unigene49502  | Potri.008G135700.2 | 17.9961 | 47.5594 | -1.402  | Down | 1.06E-39  | 8.26E-39  |
| Unigene34416  | Potri.013G068900.1 | 9.094   | 24.0346 | -1.4021 | Down | 2.80E-43  | 2.37E-42  |
| Unigene33481  | Potri.012G139400.2 | 7.3226  | 19.353  | -1.4021 | Down | 5.79E-12  | 1.83E-11  |
| Unigene39268  | Potri.004G206600.1 | 3.7416  | 9.8888  | -1.4021 | Down | 5.79E-12  | 1.83E-11  |
| Unigene25908  | Potri.003G064100.3 | 7.5305  | 19.9025 | -1.4021 | Down | 5.79E-12  | 1.83E-11  |
| Unigene10038  | Potri.012G142200.1 | 24.9674 | 65.9952 | -1.4023 | Down | 7.86E-42  | 6.43E-41  |
| Unigene480    | Potri.003G164300.3 | 7.1668  | 18.9463 | -1.4025 | Down | 1.04E-59  | 1.23E-58  |
| Unigene13653  | Potri.001G108400.2 | 6.7564  | 17.8627 | -1.4026 | Down | 6.68E-53  | 6.92E-52  |
| Unigene4425   | Potri.T059600.4    | 32.3173 | 85.448  | -1.4027 | Down | 1.01E-40  | 8.03E-40  |
| Unigene35736  | Potri.015G071800.2 | 18.9397 | 50.0753 | -1.4027 | Down | 1.47E-33  | 9.80E-33  |
| Unigene6699   | Potri.008G178700.1 | 35.593  | 94.1157 | -1.4028 | Down | 6.86E-73  | 1.01E-71  |
| Unigene47128  | Potri.016G021900.1 | 3.1162  | 8.2405  | -1.4029 | Down | 7.94E-07  | 1.84E-06  |



|               |                    |         |          |         |      |           |           |
|---------------|--------------------|---------|----------|---------|------|-----------|-----------|
| Unigene54816  | Potri.013G147800.4 | 3.4919  | 9.234    | -1.4029 | Down | 5.77E-05  | 1.13E-04  |
| Unigene88951  | Potri.001G347100.1 | 77.0857 | 203.838  | -1.4029 | Down | 1.72E-117 | 4.50E-116 |
| Unigene28551  | Potri.001G014900.1 | 1.7917  | 4.738    | -1.4029 | Down | 5.77E-05  | 1.13E-04  |
| Unigene41893  | Potri.018G060500.2 | 4.827   | 12.7647  | -1.403  | Down | 7.94E-07  | 1.84E-06  |
| Unigene48730  | Potri.016G093500.1 | 15.1961 | 40.1852  | -1.403  | Down | 6.26E-16  | 2.37E-15  |
| Unigene40367  | Potri.015G093600.1 | 8.3734  | 22.1429  | -1.403  | Down | 4.02E-14  | 1.41E-13  |
| Unigene3765   | Potri.012G077700.4 | 2.3115  | 6.1127   | -1.403  | Down | 5.77E-05  | 1.13E-04  |
| Unigene104844 | Potri.011G051000.1 | 1.8276  | 4.833    | -1.403  | Down | 5.77E-05  | 1.13E-04  |
| Unigene51825  | Potri.009G018400.2 | 2.1425  | 5.6658   | -1.403  | Down | 5.77E-05  | 1.13E-04  |
| Unigene23854  | Potri.008G100600.5 | 33.9555 | 89.7931  | -1.403  | Down | 6.48E-109 | 1.54E-107 |
| Unigene18125  | Potri.006G114600.2 | 2.5249  | 6.6769   | -1.403  | Down | 1.15E-08  | 3.03E-08  |
| Unigene105794 | Potri.005G072200.1 | 1.7167  | 4.5398   | -1.403  | Down | 5.77E-05  | 1.13E-04  |
| Unigene50763  | Potri.003G020300.1 | 4.5286  | 11.9757  | -1.403  | Down | 1.72E-10  | 5.03E-10  |
| Unigene18709  | Potri.001G136600.1 | 2.6078  | 6.8962   | -1.403  | Down | 7.94E-07  | 1.84E-06  |
| Unigene23044  | Potri.005G206300.2 | 28.601  | 75.6472  | -1.4032 | Down | 1.49E-68  | 2.04E-67  |
| Unigene16940  | Potri.002G234500.2 | 17.6682 | 46.7317  | -1.4032 | Down | 1.89E-32  | 1.22E-31  |
| Unigene10781  | Potri.006G220000.3 | 4.2543  | 11.2532  | -1.4033 | Down | 6.80E-69  | 9.39E-68  |
| Unigene38235  | Potri.003G110000.5 | 13.1081 | 34.6741  | -1.4034 | Down | 1.11E-21  | 5.24E-21  |
| Unigene42476  | Potri.009G144800.2 | 4.1772  | 11.0502  | -1.4035 | Down | 1.33E-54  | 1.42E-53  |
| Unigene15930  | Potri.010G038700.5 | 10.0508 | 26.5896  | -1.4036 | Down | 2.83E-16  | 1.09E-15  |
| Unigene37017  | Potri.004G217800.1 | 11.9041 | 31.4927  | -1.4036 | Down | 2.83E-16  | 1.09E-15  |
| Unigene39135  | Potri.002G162400.1 | 33.8233 | 89.4804  | -1.4036 | Down | 2.64E-60  | 3.16E-59  |
| Unigene48547  | Potri.010G150000.3 | 14.346  | 37.9596  | -1.4038 | Down | 5.06E-22  | 2.41E-21  |
| Unigene44016  | Potri.013G077800.1 | 8.6076  | 22.777   | -1.4039 | Down | 3.19E-20  | 1.43E-19  |
| Unigene25399  | Potri.012G042100.1 | 3.8516  | 10.1919  | -1.4039 | Down | 7.73E-11  | 2.31E-10  |
| Unigene50369  | Potri.004G126100.1 | 16.4176 | 43.4435  | -1.4039 | Down | 2.06E-57  | 2.34E-56  |
| Unigene17755  | Potri.001G137800.2 | 2.0326  | 5.3785   | -1.4039 | Down | 7.73E-11  | 2.31E-10  |
| Unigene21618  | Potri.006G065000.2 | 4.6013  | 12.1764  | -1.404  | Down | 9.39E-28  | 5.34E-27  |
| Unigene14822  | Potri.002G009100.1 | 36.4676 | 96.5042  | -1.404  | Down | 1.48E-44  | 1.28E-43  |
| Unigene38915  | Potri.013G006600.1 | 20.0923 | 53.1732  | -1.4041 | Down | 1.79E-33  | 1.19E-32  |
| Unigene25287  | Potri.011G119600.1 | 5.0913  | 13.4746  | -1.4041 | Down | 5.16E-09  | 1.39E-08  |
| Unigene106853 | Potri.007G039700.2 | 2.3093  | 6.1116   | -1.4041 | Down | 5.16E-09  | 1.39E-08  |
| Unigene14496  | Potri.006G281200.1 | 35.3249 | 93.4897  | -1.4041 | Down | 3.54E-54  | 3.75E-53  |
| Unigene19770  | Potri.006G066800.1 | 9.234   | 24.4401  | -1.4042 | Down | 4.15E-43  | 3.49E-42  |
| Unigene19765  | Potri.015G143700.1 | 45.2285 | 119.7134 | -1.4043 | Down | 1.05E-67  | 1.43E-66  |
| Unigene13140  | Potri.002G107400.6 | 6.083   | 16.1009  | -1.4043 | Down | 2.12E-73  | 3.15E-72  |
| Unigene42535  | Potri.002G027100.3 | 7.3669  | 19.5013  | -1.4044 | Down | 2.94E-66  | 3.90E-65  |
| Unigene103575 | Potri.013G142800.1 | 1.7476  | 4.6264   | -1.4045 | Down | 3.53E-07  | 8.42E-07  |
| Unigene53176  | Potri.013G075300.2 | 27.0847 | 71.6997  | -1.4045 | Down | 3.13E-30  | 1.91E-29  |

|               |                    |          |          |         |      |           |           |
|---------------|--------------------|----------|----------|---------|------|-----------|-----------|
| Unigene42518  | Potri.012G050300.1 | 13.0492  | 34.5436  | -1.4045 | Down | 1.19E-77  | 1.89E-76  |
| Unigene19568  | Potri.010G012800.5 | 9.226    | 24.4235  | -1.4045 | Down | 5.32E-13  | 1.77E-12  |
| Unigene47506  | Potri.009G047100.1 | 7.0377   | 18.6303  | -1.4045 | Down | 5.32E-13  | 1.77E-12  |
| Unigene39421  | Potri.007G085900.2 | 7.4316   | 19.6732  | -1.4045 | Down | 9.16E-19  | 3.89E-18  |
| Unigene14217  | Potri.016G012900.2 | 22.919   | 60.6813  | -1.4047 | Down | 1.21E-26  | 6.68E-26  |
| Unigene18543  | Potri.006G229400.1 | 13.4336  | 35.5662  | -1.4047 | Down | 1.04E-47  | 9.72E-47  |
| Unigene82721  | Potri.011G082800.3 | 23.5427  | 62.3405  | -1.4049 | Down | 8.86E-29  | 5.20E-28  |
| Unigene73896  | Potri.002G110500.1 | 18.7373  | 49.6184  | -1.405  | Down | 4.15E-19  | 1.79E-18  |
| Unigene87462  | Potri.015G073300.1 | 11.3315  | 30.0117  | -1.4052 | Down | 2.64E-17  | 1.06E-16  |
| Unigene26286  | Potri.014G051900.2 | 7.7843   | 20.6168  | -1.4052 | Down | 2.31E-09  | 6.36E-09  |
| Unigene105129 | Potri.013G117400.2 | 3.2086   | 8.4979   | -1.4052 | Down | 2.54E-05  | 5.17E-05  |
| Unigene27869  | Potri.011G137100.1 | 40.6848  | 107.7574 | -1.4052 | Down | 1.65E-109 | 3.96E-108 |
| Unigene44508  | Potri.010G033900.2 | 5.3497   | 14.1689  | -1.4052 | Down | 2.40E-13  | 8.14E-13  |
| Unigene40172  | Potri.009G084500.1 | 2.0485   | 5.4255   | -1.4052 | Down | 2.54E-05  | 5.17E-05  |
| Unigene14378  | Potri.007G034900.1 | 32.4344  | 85.9032  | -1.4052 | Down | 1.79E-60  | 2.14E-59  |
| Unigene37610  | Potri.003G019000.1 | 2.6485   | 7.0146   | -1.4052 | Down | 2.54E-05  | 5.17E-05  |
| Unigene19669  | Potri.001G436300.2 | 7.5226   | 19.9238  | -1.4052 | Down | 2.31E-09  | 6.36E-09  |
| Unigene75166  | Potri.014G025400.1 | 107.3001 | 284.2323 | -1.4054 | Down | 1.69E-104 | 3.82E-103 |
| Unigene13378  | Potri.002G140200.1 | 35.7992  | 94.8281  | -1.4054 | Down | 9.00E-142 | 2.99E-140 |
| Unigene22832  | Potri.014G123200.1 | 12.1209  | 32.1103  | -1.4055 | Down | 1.60E-35  | 1.13E-34  |
| Unigene2782   | Potri.010G174900.1 | 11.6988  | 30.9914  | -1.4055 | Down | 2.79E-63  | 3.51E-62  |
| Unigene34317  | Potri.009G116100.1 | 16.4028  | 43.4533  | -1.4055 | Down | 1.57E-25  | 8.34E-25  |
| Unigene88703  | Potri.006G220900.5 | 22.7758  | 60.3371  | -1.4055 | Down | 1.60E-35  | 1.13E-34  |
| Unigene35457  | Potri.016G082900.1 | 25.4695  | 67.4752  | -1.4056 | Down | 1.35E-31  | 8.56E-31  |
| Unigene78089  | Potri.018G027700.1 | 21.4274  | 56.7723  | -1.4057 | Down | 9.82E-24  | 4.94E-23  |
| Unigene44395  | Potri.014G010100.1 | 21.9862  | 58.2501  | -1.4057 | Down | 1.05E-43  | 8.96E-43  |
| Unigene77925  | Potri.018G001800.2 | 5.8978   | 15.6276  | -1.4058 | Down | 1.58E-07  | 3.85E-07  |
| Unigene40555  | Potri.014G111100.2 | 3.6901   | 9.7777   | -1.4058 | Down | 1.58E-07  | 3.85E-07  |
| Unigene14199  | Potri.012G056200.1 | 6.1066   | 16.1808  | -1.4058 | Down | 1.58E-07  | 3.85E-07  |
| Unigene9865   | Potri.006G004000.1 | 4.0591   | 10.7555  | -1.4058 | Down | 1.58E-07  | 3.85E-07  |
| Unigene6665   | Potri.003G134200.2 | 25.4981  | 67.5631  | -1.4058 | Down | 4.31E-50  | 4.22E-49  |
| Unigene27783  | Potri.018G023600.1 | 3.6704   | 9.7257   | -1.4059 | Down | 1.58E-07  | 3.85E-07  |
| Unigene2723   | Potri.005G196300.2 | 16.2328  | 43.0142  | -1.4059 | Down | 3.56E-46  | 3.21E-45  |
| Unigene13451  | Potri.018G112900.1 | 3.0876   | 8.1823   | -1.406  | Down | 7.63E-16  | 2.89E-15  |
| Unigene21899  | Potri.002G019400.3 | 4.1872   | 11.0963  | -1.406  | Down | 7.63E-16  | 2.89E-15  |
| Unigene12142  | Potri.001G098500.2 | 18.2482  | 48.3568  | -1.406  | Down | 1.49E-68  | 2.05E-67  |
| Unigene18570  | Potri.019G127000.2 | 11.4832  | 30.4324  | -1.4061 | Down | 4.47E-24  | 2.27E-23  |
| Unigene13821  | Potri.006G265300.1 | 37.357   | 99.0079  | -1.4062 | Down | 6.79E-108 | 1.59E-106 |
| Unigene35190  | Potri.006G122100.1 | 8.9662   | 23.7634  | -1.4062 | Down | 1.04E-09  | 2.91E-09  |

|               |                    |         |          |         |      |           |           |
|---------------|--------------------|---------|----------|---------|------|-----------|-----------|
| Unigene25309  | Potri.001G257100.1 | 18.6498 | 49.4278  | -1.4062 | Down | 5.43E-18  | 2.24E-17  |
| Unigene6822   | Potri.001G073400.2 | 4.4724  | 11.8532  | -1.4062 | Down | 1.04E-09  | 2.91E-09  |
| Unigene21688  | Potri.014G117400.1 | 11.1075 | 29.4426  | -1.4064 | Down | 1.16E-65  | 1.52E-64  |
| Unigene10218  | Potri.013G010900.2 | 9.6306  | 25.5275  | -1.4064 | Down | 7.07E-12  | 2.23E-11  |
| Unigene36100  | Potri.011G143100.1 | 43.5049 | 115.3235 | -1.4064 | Down | 3.95E-107 | 9.18E-106 |
| Unigene11960  | Potri.008G077300.2 | 11.1052 | 29.4376  | -1.4064 | Down | 1.27E-59  | 1.50E-58  |
| Unigene3974   | Potri.001G399400.7 | 41.0465 | 108.812  | -1.4065 | Down | 3.78E-41  | 3.05E-40  |
| Unigene23761  | Potri.014G195500.2 | 3.0076  | 7.9735   | -1.4066 | Down | 2.46E-18  | 1.03E-17  |
| Unigene52938  | Potri.006G070700.4 | 24.5331 | 65.042   | -1.4066 | Down | 6.37E-54  | 6.74E-53  |
| Unigene12745  | Potri.005G003000.1 | 6.2885  | 16.6719  | -1.4066 | Down | 2.46E-18  | 1.03E-17  |
| Unigene2988   | Potri.019G080900.1 | 10.376  | 27.5105  | -1.4067 | Down | 9.49E-46  | 8.47E-45  |
| Unigene12886  | Potri.017G051600.3 | 15.9677 | 42.3356  | -1.4067 | Down | 1.27E-22  | 6.17E-22  |
| Unigene24785  | Potri.015G049100.1 | 8.5277  | 22.6092  | -1.4067 | Down | 3.55E-58  | 4.08E-57  |
| Unigene22648  | Potri.009G162500.2 | 21.6876 | 57.5021  | -1.4067 | Down | 5.78E-94  | 1.14E-92  |
| Unigene6802   | Potri.002G013000.1 | 18.7656 | 49.7531  | -1.4067 | Down | 1.73E-41  | 1.40E-40  |
| Unigene34747  | Potri.018G149500.3 | 8.3773  | 22.2124  | -1.4068 | Down | 1.62E-58  | 1.88E-57  |
| Unigene17721  | Potri.006G107900.2 | 2.8029  | 7.4331   | -1.407  | Down | 1.12E-05  | 2.35E-05  |
| Unigene18548  | Potri.019G075900.1 | 5.0196  | 13.3119  | -1.4071 | Down | 3.19E-12  | 1.02E-11  |
| Unigene43788  | Potri.019G060200.1 | 3.5137  | 9.3183   | -1.4071 | Down | 1.12E-05  | 2.35E-05  |
| Unigene26696  | Potri.018G086100.1 | 19.7468 | 52.3681  | -1.4071 | Down | 8.01E-21  | 3.67E-20  |
| Unigene8100   | Potri.013G160500.1 | 11.7246 | 31.0932  | -1.4071 | Down | 1.64E-31  | 1.04E-30  |
| Unigene13895  | Potri.013G144700.1 | 6.0161  | 15.9544  | -1.4071 | Down | 5.79E-23  | 2.84E-22  |
| Unigene11840  | Potri.012G060300.1 | 6.332   | 16.7922  | -1.4071 | Down | 3.59E-42  | 2.97E-41  |
| Unigene7156   | Potri.012G005000.1 | 17.8988 | 47.4671  | -1.4071 | Down | 4.20E-25  | 2.21E-24  |
| Unigene26017  | Potri.010G139100.4 | 5.8421  | 15.4931  | -1.4071 | Down | 7.04E-08  | 1.76E-07  |
| Unigene24946  | Potri.008G105300.6 | 8.1267  | 21.5518  | -1.4071 | Down | 2.22E-14  | 7.87E-14  |
| Unigene90527  | Potri.008G055100.2 | 2.5189  | 6.6801   | -1.4071 | Down | 1.12E-05  | 2.35E-05  |
| Unigene16431  | Potri.007G052500.5 | 12.8383 | 34.0469  | -1.4071 | Down | 2.24E-29  | 1.33E-28  |
| Unigene51060  | Potri.001G379100.1 | 5.1221  | 13.5837  | -1.4071 | Down | 7.04E-08  | 1.76E-07  |
| Unigene34557  | Potri.001G314300.1 | 7.8894  | 20.9225  | -1.4071 | Down | 2.24E-29  | 1.33E-28  |
| Unigene19674  | Potri.001G301600.6 | 31.5544 | 83.7033  | -1.4074 | Down | 3.22E-60  | 3.84E-59  |
| Unigene7415   | Potri.016G001700.3 | 17.9269 | 47.5577  | -1.4076 | Down | 3.41E-32  | 2.20E-31  |
| Unigene94176  | Potri.007G121700.1 | 8.2728  | 21.9473  | -1.4076 | Down | 4.64E-30  | 2.82E-29  |
| Unigene22468  | Potri.005G064800.3 | 8.4377  | 22.3865  | -1.4077 | Down | 8.42E-37  | 6.12E-36  |
| Unigene5671   | Potri.001G271500.2 | 35.0092 | 92.8842  | -1.4077 | Down | 8.42E-37  | 6.12E-36  |
| Unigene37538  | Potri.019G080900.1 | 18.3943 | 48.8094  | -1.4079 | Down | 2.30E-19  | 1.00E-18  |
| Unigene102158 | Potri.018G045100.3 | 3.7578  | 9.9713   | -1.4079 | Down | 2.10E-10  | 6.12E-10  |
| Unigene17766  | Potri.009G003900.3 | 4.3882  | 11.6441  | -1.4079 | Down | 2.10E-10  | 6.12E-10  |
| Unigene42066  | Potri.006G213400.5 | 7.3779  | 19.5774  | -1.4079 | Down | 2.10E-10  | 6.12E-10  |

|              |                    |         |         |         |      |          |          |
|--------------|--------------------|---------|---------|---------|------|----------|----------|
| Unigene70472 | Potri.003G104400.2 | 20.1418 | 53.4463 | -1.4079 | Down | 2.30E-19 | 1.00E-18 |
| Unigene12090 | Potri.002G207800.1 | 3.6489  | 9.6823  | -1.4079 | Down | 2.10E-10 | 6.12E-10 |
| Unigene3187  | Potri.013G109400.1 | 4.4516  | 11.8132 | -1.408  | Down | 3.22E-17 | 1.29E-16 |
| Unigene13094 | Potri.005G234700.2 | 14.4072 | 38.2331 | -1.408  | Down | 3.37E-55 | 3.66E-54 |
| Unigene2467  | Potri.013G095500.1 | 4.2407  | 11.2542 | -1.4081 | Down | 4.52E-53 | 4.70E-52 |
| Unigene99341 | Potri.014G155800.2 | 6.6491  | 17.6465 | -1.4082 | Down | 3.15E-08 | 8.08E-08 |
| Unigene44113 | Potri.013G006900.1 | 2.4236  | 6.4322  | -1.4082 | Down | 3.15E-08 | 8.08E-08 |
| Unigene15092 | Potri.005G250900.2 | 2.6877  | 7.1331  | -1.4082 | Down | 3.15E-08 | 8.08E-08 |
| Unigene53888 | Potri.012G058000.1 | 16.4045 | 43.5422 | -1.4083 | Down | 4.39E-31 | 2.75E-30 |
| Unigene267   | Potri.009G148800.1 | 4.1573  | 11.0347 | -1.4083 | Down | 4.39E-31 | 2.75E-30 |
| Unigene46982 | Potri.001G030900.4 | 32.3067 | 85.7495 | -1.4083 | Down | 7.99E-38 | 5.95E-37 |
| Unigene50732 | Potri.001G025600.1 | 27.2574 | 72.3481 | -1.4083 | Down | 3.42E-67 | 4.60E-66 |
| Unigene29481 | Potri.012G029500.1 | 4.6372  | 12.309  | -1.4084 | Down | 6.50E-13 | 2.15E-12 |
| Unigene8475  | Potri.011G090200.1 | 4.0214  | 10.6742 | -1.4084 | Down | 6.50E-13 | 2.15E-12 |
| Unigene53746 | Potri.006G183900.5 | 13.6017 | 36.1063 | -1.4085 | Down | 1.46E-17 | 5.92E-17 |
| Unigene13113 | Potri.006G140300.2 | 4.207   | 11.1677 | -1.4085 | Down | 1.46E-17 | 5.92E-17 |
| Unigene49826 | Potri.017G053600.1 | 5.8655  | 15.5713 | -1.4086 | Down | 2.00E-31 | 1.26E-30 |
| Unigene15582 | Potri.001G391900.5 | 28.2411 | 74.9741 | -1.4086 | Down | 3.08E-45 | 2.72E-44 |
| Unigene52004 | Potri.013G048000.2 | 3.8116  | 10.1196 | -1.4087 | Down | 4.95E-06 | 1.07E-05 |
| Unigene18262 | Potri.001G199100.1 | 4.1389  | 10.9886 | -1.4087 | Down | 2.06E-15 | 7.63E-15 |
| Unigene13774 | Potri.001G456500.2 | 11.0968 | 29.464  | -1.4088 | Down | 3.73E-27 | 2.08E-26 |
| Unigene69038 | Potri.019G103200.1 | 4.9566  | 13.1613 | -1.4089 | Down | 6.61E-18 | 2.72E-17 |
| Unigene51455 | Potri.011G138700.6 | 11.5234 | 30.6017 | -1.409  | Down | 2.15E-20 | 9.70E-20 |
| Unigene48281 | Potri.009G017400.4 | 19.6859 | 52.278  | -1.409  | Down | 2.15E-20 | 9.70E-20 |
| Unigene63398 | Potri.005G094200.1 | 9.4074  | 24.9824 | -1.409  | Down | 2.15E-20 | 9.70E-20 |
| Unigene45754 | Potri.002G138600.1 | 7.062   | 18.7531 | -1.409  | Down | 2.93E-13 | 9.91E-13 |
| Unigene1065  | Potri.006G189500.1 | 5.9018  | 15.6735 | -1.4091 | Down | 1.39E-34 | 9.53E-34 |
| Unigene26308 | Potri.011G154600.1 | 7.0656  | 18.7649 | -1.4092 | Down | 1.41E-08 | 3.69E-08 |
| Unigene53795 | Potri.006G099200.2 | 16.5919 | 44.0652 | -1.4092 | Down | 7.05E-23 | 3.45E-22 |
| Unigene50862 | Potri.005G076200.3 | 10.3476 | 27.4815 | -1.4092 | Down | 7.05E-23 | 3.45E-22 |
| Unigene33734 | Potri.011G026300.1 | 13.3994 | 35.5892 | -1.4093 | Down | 5.32E-42 | 4.37E-41 |
| Unigene44705 | Potri.003G090000.2 | 17.5195 | 46.5348 | -1.4093 | Down | 2.13E-37 | 1.57E-36 |
| Unigene34316 | Potri.007G091600.1 | 3.7065  | 9.8455  | -1.4094 | Down | 2.57E-30 | 1.58E-29 |
| Unigene25317 | Potri.007G026300.1 | 7.4857  | 19.884  | -1.4094 | Down | 4.25E-11 | 1.29E-10 |
| Unigene12841 | Potri.004G173500.2 | 4.6624  | 12.3847 | -1.4094 | Down | 4.25E-11 | 1.29E-10 |
| Unigene40268 | Potri.018G032300.3 | 5.8682  | 15.5891 | -1.4095 | Down | 1.33E-13 | 4.54E-13 |
| Unigene320   | Potri.015G056200.1 | 11.7306 | 31.1622 | -1.4095 | Down | 2.84E-71 | 4.07E-70 |
| Unigene7651  | Potri.011G096000.2 | 4.8278  | 12.8251 | -1.4095 | Down | 1.33E-13 | 4.54E-13 |
| Unigene50532 | Potri.004G078200.3 | 13.6827 | 36.3484 | -1.4095 | Down | 1.06E-25 | 5.66E-25 |

|               |                     |         |          |         |      |          |          |
|---------------|---------------------|---------|----------|---------|------|----------|----------|
| Unigene48600  | Potri.018G017200.1  | 17.6106 | 46.7845  | -1.4096 | Down | 3.52E-28 | 2.03E-27 |
| Unigene47481  | Potri.003G218400.1  | 27.2395 | 72.3667  | -1.4096 | Down | 1.17E-30 | 7.25E-30 |
| Unigene113141 | Potri.001G276700.2  | 13.0771 | 34.7418  | -1.4096 | Down | 4.22E-16 | 1.61E-15 |
| Unigene94561  | Potri.T130700.1     | 12.2526 | 32.5523  | -1.4097 | Down | 4.31E-50 | 4.22E-49 |
| Unigene2017   | Potri.014G088800.3  | 18.066  | 47.9972  | -1.4097 | Down | 4.31E-50 | 4.22E-49 |
| Unigene33404  | Potri.011G119500.8  | 6.8118  | 18.0976  | -1.4097 | Down | 1.36E-18 | 5.75E-18 |
| Unigene46455  | Potri.008G047700.3  | 15.6632 | 41.6153  | -1.4097 | Down | 4.44E-21 | 2.05E-20 |
| Unigene29437  | Potri.001G452300.1  | 4.1611  | 11.0555  | -1.4097 | Down | 4.43E-38 | 3.32E-37 |
| Unigene88352  | Potri.001G157300.1  | 56.3987 | 149.8472 | -1.4098 | Down | 2.81E-84 | 4.88E-83 |
| Unigene41310  | Potri.016G006600.1  | 18.3411 | 48.7352  | -1.4099 | Down | 6.00E-36 | 4.27E-35 |
| Unigene28874  | Potri.008G146600.2  | 8.1619  | 21.6873  | -1.4099 | Down | 1.79E-33 | 1.19E-32 |
| Unigene49853  | Potri.T096400.1     | 2.114   | 5.6178   | -1.41   | Down | 6.31E-09 | 1.69E-08 |
| Unigene27287  | Potri.T087500.1     | 42.1579 | 112.0289 | -1.41   | Down | 3.16E-90 | 5.94E-89 |
| Unigene27516  | Potri.006G165600.4  | 33.2119 | 88.2607  | -1.4101 | Down | 8.15E-34 | 5.48E-33 |
| Unigene14156  | Potri.003G140600.2  | 9.9265  | 26.3796  | -1.4101 | Down | 7.29E-29 | 4.28E-28 |
| Unigene22258  | Potri.015G093500.1  | 14.4193 | 38.3236  | -1.4102 | Down | 2.17E-81 | 3.63E-80 |
| Unigene528    | Potri.012G089000.3  | 7.0409  | 18.7134  | -1.4102 | Down | 1.42E-41 | 1.15E-40 |
| Unigene45436  | Potri.001G190300.1  | 6.8221  | 18.1355  | -1.4105 | Down | 1.51E-29 | 9.06E-29 |
| Unigene23754  | Potri.010G208200.1  | 4.882   | 12.9788  | -1.4106 | Down | 1.37E-24 | 7.08E-24 |
| Unigene46057  | Potri.009G075700.1  | 27.8841 | 74.128   | -1.4106 | Down | 4.54E-27 | 2.53E-26 |
| Unigene1917   | Potri.007G137400.3  | 17.8641 | 47.4916  | -1.4106 | Down | 2.59E-37 | 1.91E-36 |
| Unigene1208   | Potri.012G041300.2  | 4.8029  | 12.7697  | -1.4107 | Down | 6.88E-30 | 4.16E-29 |
| Unigene32528  | Potri.006G217500.1  | 2.7963  | 7.4345   | -1.4107 | Down | 8.63E-12 | 2.71E-11 |
| Unigene14361  | Potri.002G077700.1  | 12.637  | 33.5975  | -1.4107 | Down | 4.16E-22 | 1.98E-21 |
| Unigene79606  | Potri.015G030700.1  | 64.6219 | 171.8207 | -1.4108 | Down | 4.19E-71 | 5.99E-70 |
| Unigene38680  | Potri.006G254100.1  | 9.8681  | 26.2374  | -1.4108 | Down | 1.27E-19 | 5.58E-19 |
| Unigene89947  | Potri.014G052600.1  | 38.0071 | 101.062  | -1.4109 | Down | 1.05E-63 | 1.33E-62 |
| Unigene76711  | Potri.009G134200.4  | 7.7228  | 20.5352  | -1.4109 | Down | 2.83E-09 | 7.75E-09 |
| Unigene34189  | Potri.004G207100.6  | 3.9543  | 10.5146  | -1.4109 | Down | 6.23E-25 | 3.25E-24 |
| Unigene14166  | Potri.001G257500.2  | 7.4918  | 19.9209  | -1.4109 | Down | 2.83E-09 | 7.75E-09 |
| Unigene87959  | Potri.002G243400.10 | 36.4962 | 97.0627  | -1.4112 | Down | 3.54E-54 | 3.76E-53 |
| Unigene39533  | Potri.002G169800.1  | 6.7484  | 17.948   | -1.4112 | Down | 3.78E-41 | 3.05E-40 |
| Unigene33744  | Potri.008G084200.1  | 9.0082  | 23.9595  | -1.4113 | Down | 8.59E-23 | 4.19E-22 |
| Unigene69591  | Potri.007G017000.1  | 2.7661  | 7.3572   | -1.4113 | Down | 3.89E-12 | 1.24E-11 |
| Unigene8039   | Potri.006G119200.1  | 5.0469  | 13.4234  | -1.4113 | Down | 3.89E-12 | 1.24E-11 |
| Unigene50093  | Potri.001G126200.1  | 4.9733  | 13.2276  | -1.4113 | Down | 8.59E-23 | 4.19E-22 |
| Unigene18771  | Potri.001G001300.3  | 3.2972  | 8.7697   | -1.4113 | Down | 9.74E-07 | 2.24E-06 |
| Unigene33225  | Potri.010G013700.2  | 5.3976  | 14.3576  | -1.4114 | Down | 1.29E-25 | 6.87E-25 |
| Unigene77837  | Potri.001G013800.1  | 18.0895 | 48.1188  | -1.4114 | Down | 2.62E-20 | 1.18E-19 |

|               |                    |         |          |         |      |           |           |
|---------------|--------------------|---------|----------|---------|------|-----------|-----------|
| Unigene1056   | Potri.012G067500.1 | 5.2196  | 13.8844  | -1.4115 | Down | 5.11E-39  | 3.92E-38  |
| Unigene9909   | Potri.001G326700.2 | 7.3689  | 19.6025  | -1.4115 | Down | 5.54E-15  | 2.02E-14  |
| Unigene35024  | Potri.002G099000.1 | 17.9924 | 47.8644  | -1.4116 | Down | 1.22E-44  | 1.06E-43  |
| Unigene54241  | Potri.019G101800.1 | 6.5981  | 17.5538  | -1.4117 | Down | 1.27E-09  | 3.54E-09  |
| Unigene28473  | Potri.019G086800.1 | 4.1164  | 10.9514  | -1.4117 | Down | 1.27E-09  | 3.54E-09  |
| Unigene63991  | Potri.017G111800.6 | 4.0435  | 10.7575  | -1.4117 | Down | 1.27E-09  | 3.54E-09  |
| Unigene53858  | Potri.015G033400.1 | 5.2369  | 13.9324  | -1.4117 | Down | 1.27E-09  | 3.54E-09  |
| Unigene24955  | Potri.004G201400.2 | 15.8241 | 42.0988  | -1.4117 | Down | 8.06E-18  | 3.31E-17  |
| Unigene19064  | Potri.015G145300.1 | 7.2844  | 19.3835  | -1.4119 | Down | 2.51E-15  | 9.27E-15  |
| Unigene51886  | Potri.006G193900.1 | 11.9072 | 31.6845  | -1.4119 | Down | 2.51E-15  | 9.27E-15  |
| Unigene32745  | Potri.013G126000.1 | 55.9984 | 149.0128 | -1.412  | Down | 5.66E-284 | 4.64E-282 |
| Unigene10839  | Potri.008G134200.1 | 8.7284  | 23.2272  | -1.412  | Down | 2.77E-51  | 2.78E-50  |
| Unigene43406  | Potri.003G170600.1 | 11.4768 | 30.5408  | -1.412  | Down | 9.39E-35  | 6.46E-34  |
| Unigene36669  | Potri.003G115500.3 | 15.9482 | 42.4386  | -1.412  | Down | 6.14E-32  | 3.94E-31  |
| Unigene45179  | Potri.008G058300.1 | 8.7228  | 23.2134  | -1.4121 | Down | 5.27E-46  | 4.73E-45  |
| Unigene49064  | Potri.002G018100.1 | 19.6579 | 52.3132  | -1.4121 | Down | 2.21E-40  | 1.75E-39  |
| Unigene21350  | Potri.016G059800.1 | 7.5678  | 20.141   | -1.4122 | Down | 2.83E-71  | 4.06E-70  |
| Unigene28307  | Potri.015G089300.1 | 23.1709 | 61.6695  | -1.4122 | Down | 3.73E-49  | 3.57E-48  |
| Unigene31260  | Potri.001G213200.1 | 22.9536 | 61.0874  | -1.4122 | Down | 1.84E-29  | 1.10E-28  |
| Unigene9688   | Potri.017G028300.2 | 1.647   | 4.3838   | -1.4123 | Down | 3.73E-04  | 6.74E-04  |
| Unigene43607  | Potri.014G053200.1 | 4.7457  | 12.6316  | -1.4123 | Down | 2.99E-38  | 2.25E-37  |
| Unigene11163  | Potri.010G147900.1 | 16.8321 | 44.7993  | -1.4123 | Down | 1.40E-57  | 1.59E-56  |
| Unigene38887  | Potri.006G197200.1 | 1.6556  | 4.4067   | -1.4123 | Down | 3.73E-04  | 6.74E-04  |
| Unigene53645  | Potri.006G096100.1 | 2.7332  | 7.2749   | -1.4123 | Down | 3.73E-04  | 6.74E-04  |
| Unigene102387 | Potri.003G079800.1 | 1.3755  | 3.6611   | -1.4123 | Down | 3.73E-04  | 6.74E-04  |
| Unigene92706  | Potri.001G004600.1 | 26.6425 | 70.9103  | -1.4123 | Down | 2.18E-60  | 2.60E-59  |
| Unigene31102  | Potri.019G007200.1 | 1.4122  | 3.759    | -1.4124 | Down | 3.73E-04  | 6.74E-04  |
| Unigene104401 | Potri.011G089700.4 | 2.0345  | 5.4153   | -1.4124 | Down | 5.70E-10  | 1.63E-09  |
| Unigene100379 | Potri.010G164700.4 | 1.9099  | 5.0837   | -1.4124 | Down | 3.73E-04  | 6.74E-04  |
| Unigene25479  | Potri.007G131800.1 | 4.3731  | 11.6399  | -1.4124 | Down | 4.33E-07  | 1.03E-06  |
| Unigene103851 | Potri.005G160900.1 | 1.3936  | 3.7094   | -1.4124 | Down | 3.73E-04  | 6.74E-04  |
| Unigene112661 | Potri.002G029300.3 | 2.5881  | 6.8889   | -1.4124 | Down | 3.73E-04  | 6.74E-04  |
| Unigene28540  | Potri.001G256100.1 | 7.809   | 20.7855  | -1.4124 | Down | 1.14E-15  | 4.26E-15  |
| Unigene19022  | Potri.005G153800.1 | 15.6491 | 41.6584  | -1.4125 | Down | 8.89E-36  | 6.29E-35  |
| Unigene42086  | Potri.010G014600.3 | 16.2933 | 43.3768  | -1.4126 | Down | 1.12E-21  | 5.25E-21  |
| Unigene6823   | Potri.006G000500.3 | 11.5428 | 30.7299  | -1.4126 | Down | 1.12E-21  | 5.25E-21  |
| Unigene34812  | Potri.004G108000.1 | 4.9191  | 13.0958  | -1.4126 | Down | 9.58E-42  | 7.83E-41  |
| Unigene11731  | Potri.018G000500.1 | 7.6507  | 20.3686  | -1.4127 | Down | 2.58E-73  | 3.82E-72  |
| Unigene27633  | Potri.009G135500.2 | 19.7895 | 52.6873  | -1.4127 | Down | 2.65E-33  | 1.76E-32  |

|               |                    |         |         |         |      |           |           |
|---------------|--------------------|---------|---------|---------|------|-----------|-----------|
| Unigene18948  | Potri.012G131100.1 | 4.9733  | 13.242  | -1.4128 | Down | 3.58E-13  | 1.20E-12  |
| Unigene13793  | Potri.001G382700.1 | 4.4759  | 11.917  | -1.4128 | Down | 5.14E-16  | 1.96E-15  |
| Unigene995    | Potri.001G357700.1 | 8.2963  | 22.089  | -1.4128 | Down | 4.37E-42  | 3.60E-41  |
| Unigene13338  | Potri.T034900.1    | 23.2459 | 61.8966 | -1.4129 | Down | 3.08E-45  | 2.72E-44  |
| Unigene70419  | Potri.006G202100.1 | 6.8092  | 18.1309 | -1.4129 | Down | 5.24E-54  | 5.54E-53  |
| Unigene29104  | Potri.006G127100.1 | 34.3731 | 91.5389 | -1.4131 | Down | 2.65E-116 | 6.87E-115 |
| Unigene29311  | Potri.006G109500.5 | 23.436  | 62.4115 | -1.4131 | Down | 9.93E-49  | 9.44E-48  |
| Unigene20917  | Potri.001G065600.1 | 3.6087  | 9.6109  | -1.4132 | Down | 2.30E-22  | 1.11E-21  |
| Unigene54144  | Potri.008G048900.2 | 3.8809  | 10.3367 | -1.4133 | Down | 1.62E-13  | 5.52E-13  |
| Unigene2924   | Potri.004G081300.2 | 1.4194  | 3.7806  | -1.4133 | Down | 1.93E-07  | 4.69E-07  |
| Unigene77378  | Potri.003G153300.1 | 11.6258 | 30.9652 | -1.4133 | Down | 1.62E-13  | 5.52E-13  |
| Unigene61698  | Potri.002G165900.1 | 7.3577  | 19.5972 | -1.4133 | Down | 1.62E-13  | 5.52E-13  |
| Unigene18666  | Potri.002G141100.5 | 1.902   | 5.0658  | -1.4133 | Down | 1.93E-07  | 4.69E-07  |
| Unigene27957  | Potri.002G133100.2 | 3.4081  | 9.0774  | -1.4133 | Down | 1.93E-07  | 4.69E-07  |
| Unigene32352  | Potri.013G052700.4 | 13.33   | 35.5079 | -1.4135 | Down | 7.98E-38  | 5.94E-37  |
| Unigene33151  | Potri.005G197900.4 | 10.6403 | 28.3438 | -1.4135 | Down | 7.48E-32  | 4.78E-31  |
| Unigene45596  | Potri.018G149900.1 | 3.1561  | 8.408   | -1.4136 | Down | 1.15E-10  | 3.42E-10  |
| Unigene2398   | Potri.001G101700.3 | 18.6181 | 49.6004 | -1.4136 | Down | 1.97E-50  | 1.94E-49  |
| Unigene19993  | Potri.007G049000.6 | 16.1464 | 43.017  | -1.4137 | Down | 4.75E-23  | 2.34E-22  |
| Unigene39451  | Potri.017G059000.5 | 5.308   | 14.1421 | -1.4138 | Down | 7.31E-14  | 2.53E-13  |
| Unigene19236  | Potri.006G109900.3 | 13.6034 | 36.2455 | -1.4138 | Down | 4.78E-17  | 1.90E-16  |
| Unigene24541  | Potri.012G060100.1 | 7.3101  | 19.4779 | -1.4139 | Down | 1.08E-35  | 7.64E-35  |
| Unigene48895  | Potri.010G113900.2 | 1.561   | 4.1601  | -1.4141 | Down | 1.62E-04  | 3.04E-04  |
| Unigene47788  | Potri.010G057600.1 | 1.5749  | 4.1971  | -1.4141 | Down | 1.62E-04  | 3.04E-04  |
| Unigene49379  | Potri.001G357700.1 | 2.002   | 5.3353  | -1.4141 | Down | 1.62E-04  | 3.04E-04  |
| Unigene8924   | Potri.017G033700.1 | 2.427   | 6.4682  | -1.4142 | Down | 1.62E-04  | 3.04E-04  |
| Unigene23948  | Potri.014G141100.6 | 3.6281  | 9.6691  | -1.4142 | Down | 5.19E-11  | 1.57E-10  |
| Unigene46459  | Potri.011G129300.1 | 2.5959  | 6.9183  | -1.4142 | Down | 1.62E-04  | 3.04E-04  |
| Unigene105305 | Potri.011G002800.1 | 1.3681  | 3.6461  | -1.4142 | Down | 1.62E-04  | 3.04E-04  |
| Unigene52189  | Potri.009G032700.1 | 9.9816  | 26.6015 | -1.4142 | Down | 3.30E-14  | 1.16E-13  |
| Unigene18806  | Potri.008G050800.2 | 4.4759  | 11.9287 | -1.4142 | Down | 5.19E-11  | 1.57E-10  |
| Unigene16530  | Potri.007G092800.2 | 8.9425  | 23.8322 | -1.4142 | Down | 3.30E-14  | 1.16E-13  |
| Unigene119164 | Potri.006G255500.1 | 1.1792  | 3.1426  | -1.4142 | Down | 1.62E-04  | 3.04E-04  |
| Unigene35094  | Potri.006G116700.5 | 9.8887  | 26.354  | -1.4142 | Down | 4.64E-30  | 2.82E-29  |
| Unigene5563   | Potri.006G054300.1 | 1.3222  | 3.5237  | -1.4142 | Down | 1.62E-04  | 3.04E-04  |
| Unigene50675  | Potri.004G048900.2 | 1.7243  | 4.5954  | -1.4142 | Down | 1.62E-04  | 3.04E-04  |
| Unigene18324  | Potri.003G134200.2 | 9.1326  | 24.339  | -1.4142 | Down | 3.22E-33  | 2.14E-32  |
| Unigene14475  | Potri.002G259900.1 | 9.9118  | 26.4154 | -1.4142 | Down | 3.30E-14  | 1.16E-13  |
| Unigene34590  | Potri.018G129900.2 | 28.8067 | 76.7847 | -1.4144 | Down | 1.71E-126 | 4.91E-125 |

|               |                    |         |          |         |      |           |           |
|---------------|--------------------|---------|----------|---------|------|-----------|-----------|
| Unigene12723  | Potri.010G207900.2 | 11.9243 | 31.7837  | -1.4144 | Down | 1.15E-49  | 1.11E-48  |
| Unigene13609  | Potri.007G134300.1 | 6.6447  | 17.7125  | -1.4145 | Down | 6.69E-34  | 4.51E-33  |
| Unigene27345  | Potri.005G251300.4 | 34.8221 | 92.8263  | -1.4145 | Down | 1.05E-43  | 8.96E-43  |
| Unigene18259  | Potri.013G142300.1 | 23.2574 | 62       | -1.4146 | Down | 2.79E-63  | 3.51E-62  |
| Unigene111886 | Potri.015G006700.6 | 15.5808 | 41.5417  | -1.4148 | Down | 4.45E-18  | 1.85E-17  |
| Unigene37938  | Potri.014G000600.1 | 13.9873 | 37.2931  | -1.4148 | Down | 4.45E-18  | 1.85E-17  |
| Unigene25406  | Potri.010G222300.1 | 29.4927 | 78.6348  | -1.4148 | Down | 3.11E-41  | 2.51E-40  |
| Unigene69986  | Potri.010G033400.1 | 5.3671  | 14.3103  | -1.4148 | Down | 9.24E-25  | 4.80E-24  |
| Unigene71214  | Potri.008G012600.4 | 25.6665 | 68.4342  | -1.4148 | Down | 9.24E-25  | 4.80E-24  |
| Unigene20069  | Potri.001G450900.1 | 29.0484 | 77.4479  | -1.4148 | Down | 2.19E-44  | 1.89E-43  |
| Unigene13092  | Potri.008G063900.1 | 44.7447 | 119.3114 | -1.4149 | Down | 2.57E-303 | 2.30E-301 |
| Unigene20670  | Potri.008G034800.2 | 15.5415 | 41.441   | -1.4149 | Down | 2.89E-28  | 1.67E-27  |
| Unigene29212  | Potri.006G086400.2 | 2.8151  | 7.5063   | -1.4149 | Down | 3.85E-08  | 9.83E-08  |
| Unigene53561  | Potri.004G115900.1 | 14.0092 | 37.3553  | -1.4149 | Down | 6.76E-15  | 2.45E-14  |
| Unigene14476  | Potri.003G180800.2 | 14.6273 | 39.0033  | -1.4149 | Down | 6.76E-15  | 2.45E-14  |
| Unigene28559  | Potri.002G079100.1 | 4.7365  | 12.6296  | -1.4149 | Down | 3.85E-08  | 9.83E-08  |
| Unigene68653  | Potri.001G351300.1 | 2.7326  | 7.2863   | -1.4149 | Down | 3.85E-08  | 9.82E-08  |
| Unigene59830  | Potri.018G096200.2 | 3.3755  | 9.0008   | -1.415  | Down | 3.85E-08  | 9.82E-08  |
| Unigene44851  | Potri.013G087300.1 | 30.7675 | 82.0498  | -1.4151 | Down | 3.15E-139 | 1.02E-137 |
| Unigene35985  | Potri.002G162400.1 | 46.8765 | 125.0086 | -1.4151 | Down | 6.32E-79  | 1.02E-77  |
| Unigene32677  | Potri.017G012600.3 | 10.437  | 27.8347  | -1.4152 | Down | 4.15E-32  | 2.67E-31  |
| Unigene8659   | Potri.012G139900.2 | 5.964   | 15.9055  | -1.4152 | Down | 6.17E-22  | 2.92E-21  |
| Unigene50232  | Potri.006G121100.1 | 3.437   | 9.1661   | -1.4152 | Down | 1.05E-11  | 3.30E-11  |
| Unigene89099  | Potri.006G056900.1 | 45.9813 | 122.6342 | -1.4152 | Down | 5.64E-73  | 8.29E-72  |
| Unigene47326  | Potri.014G195500.2 | 4.746   | 12.6587  | -1.4153 | Down | 6.00E-36  | 4.26E-35  |
| Unigene18775  | Potri.006G234000.2 | 19.2258 | 51.2788  | -1.4153 | Down | 4.33E-46  | 3.89E-45  |
| Unigene35936  | Potri.006G221700.1 | 10.8076 | 28.8254  | -1.4153 | Down | 3.06E-15  | 1.13E-14  |
| Unigene46558  | Potri.005G206000.1 | 7.3532  | 19.6134  | -1.4154 | Down | 2.80E-22  | 1.34E-21  |
| Unigene16108  | Potri.003G082100.1 | 61.6098 | 164.3357 | -1.4154 | Down | 1.36E-87  | 2.46E-86  |
| Unigene32899  | Potri.003G074000.1 | 4.379   | 11.68    | -1.4154 | Down | 4.52E-53  | 4.70E-52  |
| Unigene23123  | Potri.003G097700.2 | 39.1855 | 104.5267 | -1.4155 | Down | 6.69E-95  | 1.34E-93  |
| Unigene30086  | Potri.018G018100.1 | 4.5277  | 12.0788  | -1.4156 | Down | 1.72E-08  | 4.50E-08  |
| Unigene11874  | Potri.013G157700.2 | 1.7253  | 4.6027   | -1.4156 | Down | 1.72E-08  | 4.50E-08  |
| Unigene25581  | Potri.010G106200.2 | 1.5745  | 4.2003   | -1.4156 | Down | 1.72E-08  | 4.50E-08  |
| Unigene28199  | Potri.006G111700.1 | 1.6666  | 4.446    | -1.4156 | Down | 7.10E-05  | 1.39E-04  |
| Unigene32666  | Potri.001G150400.1 | 8.2183  | 21.9273  | -1.4158 | Down | 9.21E-101 | 1.99E-99  |
| Unigene39672  | Potri.008G178400.1 | 4.4198  | 11.793   | -1.4159 | Down | 1.89E-19  | 8.23E-19  |
| Unigene68928  | Potri.015G123400.2 | 7.0275  | 18.7531  | -1.416  | Down | 2.14E-12  | 6.93E-12  |
| Unigene49911  | Potri.005G247000.2 | 4.3942  | 11.7253  | -1.416  | Down | 6.27E-16  | 2.38E-15  |



|               |                    |         |          |         |      |           |           |
|---------------|--------------------|---------|----------|---------|------|-----------|-----------|
| Unigene70813  | Potri.001G171200.1 | 15.959  | 42.5843  | -1.416  | Down | 6.27E-16  | 2.38E-15  |
| Unigene2596   | Potri.015G096100.1 | 9.7449  | 26.0057  | -1.4161 | Down | 1.17E-30  | 7.25E-30  |
| Unigene12672  | Potri.010G015200.3 | 25.2525 | 67.3913  | -1.4161 | Down | 3.90E-56  | 4.31E-55  |
| Unigene24436  | Potri.005G188300.1 | 34.8358 | 92.963   | -1.4161 | Down | 8.42E-103 | 1.86E-101 |
| Unigene36     | Potri.002G038000.1 | 19.1663 | 51.1491  | -1.4161 | Down | 1.30E-146 | 4.51E-145 |
| Unigene22637  | Potri.001G420400.1 | 7.2698  | 19.3998  | -1.4161 | Down | 2.63E-23  | 1.31E-22  |
| Unigene13713  | Potri.001G300900.1 | 9.0804  | 24.2315  | -1.4161 | Down | 2.63E-23  | 1.31E-22  |
| Unigene38468  | Potri.018G097000.1 | 6.556   | 17.4974  | -1.4163 | Down | 1.20E-23  | 6.00E-23  |
| Unigene8035   | Potri.006G046200.1 | 21.2746 | 56.7802  | -1.4163 | Down | 5.49E-53  | 5.70E-52  |
| Unigene102014 | Potri.002G129300.1 | 1.8607  | 4.9662   | -1.4163 | Down | 7.72E-09  | 2.05E-08  |
| Unigene1777   | Potri.001G368000.6 | 60.9517 | 162.6768 | -1.4163 | Down | 3.55E-210 | 1.95E-208 |
| Unigene9364   | Potri.006G255000.1 | 16.6946 | 44.5602  | -1.4164 | Down | 3.89E-20  | 1.74E-19  |
| Unigene50371  | Potri.009G150300.3 | 4.8059  | 12.8284  | -1.4165 | Down | 9.67E-13  | 3.18E-12  |
| Unigene118941 | Potri.013G060000.1 | 1.6248  | 4.3382   | -1.4168 | Down | 3.12E-05  | 6.29E-05  |
| Unigene3046   | Potri.011G127700.1 | 2.2796  | 6.0865   | -1.4168 | Down | 4.37E-13  | 1.46E-12  |
| Unigene5819   | Potri.006G123500.3 | 7.0608  | 18.8523  | -1.4168 | Down | 3.46E-09  | 9.41E-09  |
| Unigene3929   | Potri.005G214400.6 | 2.6478  | 7.0696   | -1.4168 | Down | 3.12E-05  | 6.29E-05  |
| Unigene20694  | Potri.018G102400.2 | 26.5199 | 70.8123  | -1.4169 | Down | 4.75E-48  | 4.46E-47  |
| Unigene57750  | Potri.014G140100.1 | 1.9997  | 5.3393   | -1.4169 | Down | 3.12E-05  | 6.29E-05  |
| Unigene100717 | Potri.013G052700.5 | 1.4274  | 3.8112   | -1.4169 | Down | 3.12E-05  | 6.29E-05  |
| Unigene51228  | Potri.007G016900.1 | 2.1829  | 5.8284   | -1.4169 | Down | 3.12E-05  | 6.29E-05  |
| Unigene21393  | Potri.006G096000.3 | 8.9691  | 23.9485  | -1.4169 | Down | 5.08E-71  | 7.25E-70  |
| Unigene43181  | Potri.003G133100.1 | 10.9196 | 29.1585  | -1.417  | Down | 3.20E-52  | 3.27E-51  |
| Unigene12364  | Potri.008G206000.2 | 5.074   | 13.5501  | -1.4171 | Down | 2.64E-17  | 1.06E-16  |
| Unigene46478  | Potri.006G251900.2 | 46.0759 | 123.0439 | -1.4171 | Down | 3.25E-68  | 4.44E-67  |
| Unigene70349  | Potri.003G036900.4 | 4.4494  | 11.8822  | -1.4171 | Down | 2.64E-17  | 1.06E-16  |
| Unigene46224  | Potri.009G044400.4 | 35.9984 | 96.1408  | -1.4172 | Down | 4.51E-57  | 5.08E-56  |
| Unigene39756  | Potri.005G232200.1 | 4.7774  | 12.7587  | -1.4172 | Down | 3.15E-37  | 2.31E-36  |
| Unigene43712  | Potri.005G110600.3 | 7.2409  | 19.3387  | -1.4172 | Down | 1.65E-21  | 7.73E-21  |
| Unigene31904  | Potri.002G110500.1 | 17.9497 | 47.9373  | -1.4172 | Down | 2.34E-155 | 8.77E-154 |
| Unigene32133  | Potri.012G086700.1 | 4.9649  | 13.2602  | -1.4173 | Down | 1.65E-21  | 7.73E-21  |
| Unigene20647  | Potri.013G093700.1 | 21.8523 | 58.37    | -1.4174 | Down | 4.30E-50  | 4.21E-49  |
| Unigene8141   | Potri.002G025100.2 | 10.3341 | 27.602   | -1.4174 | Down | 9.90E-34  | 6.64E-33  |
| Unigene53341  | Potri.002G002400.1 | 12.9691 | 34.6424  | -1.4175 | Down | 7.51E-22  | 3.55E-21  |
| Unigene23491  | Potri.008G201700.1 | 6.5728  | 17.5594  | -1.4177 | Down | 3.41E-22  | 1.63E-21  |
| Unigene24324  | Potri.013G004700.4 | 2.7226  | 7.2744   | -1.4178 | Down | 6.97E-10  | 1.98E-09  |
| Unigene77381  | Potri.010G186500.1 | 20.1837 | 53.9282  | -1.4178 | Down | 1.55E-22  | 7.50E-22  |
| Unigene38605  | Potri.006G239000.2 | 1.5237  | 4.0711   | -1.4178 | Down | 1.37E-05  | 2.87E-05  |
| Unigene27470  | Potri.002G124200.4 | 26.3601 | 70.4306  | -1.4178 | Down | 4.27E-35  | 2.96E-34  |

|               |                    |         |          |         |      |           |           |
|---------------|--------------------|---------|----------|---------|------|-----------|-----------|
| Unigene891    | Potri.010G174900.4 | 6.4823  | 17.3204  | -1.4179 | Down | 5.62E-73  | 8.27E-72  |
| Unigene32976  | Potri.009G017400.4 | 14.8544 | 39.6917  | -1.4179 | Down | 1.29E-39  | 1.00E-38  |
| Unigene94688  | Potri.005G010600.1 | 3.918   | 10.4684  | -1.4179 | Down | 1.37E-05  | 2.87E-05  |
| Unigene9033   | Potri.004G196300.1 | 1.6533  | 4.4175   | -1.4179 | Down | 1.37E-05  | 2.87E-05  |
| Unigene19550  | Potri.001G288000.5 | 2.1635  | 5.7807   | -1.4179 | Down | 1.37E-05  | 2.87E-05  |
| Unigene42183  | Potri.001G145400.1 | 18.344  | 49.0128  | -1.4179 | Down | 9.96E-27  | 5.50E-26  |
| Unigene21223  | Potri.001G360600.1 | 15.4155 | 41.1928  | -1.418  | Down | 1.46E-166 | 6.02E-165 |
| Unigene44284  | Potri.004G041800.2 | 5.7996  | 15.4983  | -1.4181 | Down | 1.12E-18  | 4.73E-18  |
| Unigene44456  | Potri.002G232600.2 | 9.3249  | 24.92    | -1.4181 | Down | 2.06E-27  | 1.16E-26  |
| Unigene32045  | Potri.009G037800.1 | 4.7655  | 12.7368  | -1.4183 | Down | 9.39E-28  | 5.34E-27  |
| Unigene104510 | Potri.002G056200.1 | 2.9657  | 7.9264   | -1.4183 | Down | 3.13E-10  | 9.05E-10  |
| Unigene45255  | Potri.010G040600.3 | 9.108   | 24.3448  | -1.4184 | Down | 8.40E-37  | 6.11E-36  |
| Unigene109471 | Potri.008G043700.3 | 13.7054 | 36.634   | -1.4184 | Down | 8.24E-15  | 2.98E-14  |
| Unigene85977  | Potri.004G217000.1 | 9.9549  | 26.6091  | -1.4184 | Down | 8.24E-15  | 2.98E-14  |
| Unigene46077  | Potri.010G046800.1 | 15.8785 | 42.4446  | -1.4185 | Down | 2.30E-19  | 9.99E-19  |
| Unigene22231  | Potri.015G124800.1 | 5.9396  | 15.8783  | -1.4186 | Down | 1.62E-46  | 1.47E-45  |
| Unigene21345  | Potri.002G100800.1 | 7.6597  | 20.477   | -1.4186 | Down | 2.94E-109 | 7.02E-108 |
| Unigene7860   | Potri.018G079200.1 | 3.5967  | 9.6157   | -1.4187 | Down | 6.07E-06  | 1.31E-05  |
| Unigene30382  | Potri.007G138700.1 | 4.8263  | 12.9029  | -1.4187 | Down | 3.73E-15  | 1.37E-14  |
| Unigene63819  | Potri.002G226600.1 | 2.3978  | 6.4105   | -1.4187 | Down | 6.07E-06  | 1.31E-05  |
| Unigene110906 | Potri.001G162800.1 | 31.0556 | 83.0258  | -1.4187 | Down | 2.64E-33  | 1.76E-32  |
| Unigene22284  | Potri.005G002700.1 | 9.3249  | 24.9338  | -1.4189 | Down | 7.03E-48  | 6.57E-47  |
| Unigene43557  | Potri.002G221000.1 | 8.0211  | 21.4473  | -1.4189 | Down | 2.16E-52  | 2.22E-51  |
| Unigene1200   | Potri.005G171300.1 | 7.8173  | 20.9047  | -1.4191 | Down | 1.46E-48  | 1.39E-47  |
| Unigene33580  | Potri.002G008600.5 | 10.9936 | 29.3987  | -1.4191 | Down | 2.15E-20  | 9.69E-20  |
| Unigene11328  | Potri.001G322900.1 | 5.0139  | 13.4079  | -1.4191 | Down | 1.46E-48  | 1.39E-47  |
| Unigene21691  | Potri.014G167000.1 | 5.6804  | 15.1918  | -1.4192 | Down | 1.87E-63  | 2.37E-62  |
| Unigene84072  | Potri.006G234500.2 | 23.0579 | 61.666   | -1.4192 | Down | 3.81E-30  | 2.32E-29  |
| Unigene34402  | Potri.002G065400.1 | 9.9418  | 26.5876  | -1.4192 | Down | 1.82E-72  | 2.65E-71  |
| Unigene19081  | Potri.T171700.1    | 3.8358  | 10.2601  | -1.4194 | Down | 2.85E-11  | 8.74E-11  |
| Unigene105382 | Potri.014G170500.1 | 3.2386  | 8.6627   | -1.4194 | Down | 2.69E-06  | 5.97E-06  |
| Unigene45349  | Potri.014G045500.1 | 10.6512 | 28.4902  | -1.4194 | Down | 2.07E-45  | 1.84E-44  |
| Unigene7797   | Potri.009G167900.1 | 7.5806  | 20.2767  | -1.4194 | Down | 8.17E-65  | 1.06E-63  |
| Unigene44042  | Potri.008G114200.1 | 18.6498 | 49.8821  | -1.4194 | Down | 3.27E-40  | 2.57E-39  |
| Unigene28868  | Potri.007G103200.1 | 5.2701  | 14.0966  | -1.4194 | Down | 4.43E-21  | 2.04E-20  |
| Unigene75128  | Potri.004G007500.1 | 49.0515 | 131.1983 | -1.4194 | Down | 6.35E-50  | 6.19E-49  |
| Unigene45478  | Potri.T070800.2    | 4.9317  | 13.1915  | -1.4195 | Down | 3.46E-16  | 1.33E-15  |
| Unigene40799  | Potri.004G136100.1 | 25.1555 | 67.2869  | -1.4195 | Down | 5.86E-26  | 3.16E-25  |
| Unigene36631  | Potri.011G083100.1 | 15.1583 | 40.5522  | -1.4197 | Down | 1.57E-16  | 6.10E-16  |

|              |                    |         |          |         |      |           |           |
|--------------|--------------------|---------|----------|---------|------|-----------|-----------|
| Unigene8450  | Potri.002G091900.1 | 8.4827  | 22.6944  | -1.4197 | Down | 1.02E-36  | 7.41E-36  |
| Unigene11547 | Potri.011G056100.1 | 10.0936 | 27.0062  | -1.4198 | Down | 5.52E-27  | 3.07E-26  |
| Unigene8700  | Potri.008G187600.1 | 22.3797 | 59.876   | -1.4198 | Down | 9.14E-22  | 4.31E-21  |
| Unigene22245 | Potri.001G171100.2 | 10.3013 | 27.5616  | -1.4198 | Down | 4.66E-37  | 3.41E-36  |
| Unigene42527 | Potri.010G141700.1 | 8.5395  | 22.8508  | -1.42   | Down | 4.11E-84  | 7.12E-83  |
| Unigene12074 | Potri.018G125200.1 | 5.3203  | 14.2374  | -1.4201 | Down | 3.22E-17  | 1.29E-16  |
| Unigene75352 | Potri.007G031000.1 | 15.7675 | 42.1945  | -1.4201 | Down | 3.22E-17  | 1.29E-16  |
| Unigene12124 | Potri.005G032800.1 | 6.6837  | 17.8859  | -1.4201 | Down | 5.80E-12  | 1.84E-11  |
| Unigene1671  | Potri.004G030700.3 | 3.736   | 9.9976   | -1.4201 | Down | 5.80E-12  | 1.84E-11  |
| Unigene30033 | Potri.001G157800.1 | 8.793   | 23.5305  | -1.4201 | Down | 5.80E-12  | 1.84E-11  |
| Unigene4000  | Potri.019G099000.1 | 57.6251 | 154.218  | -1.4202 | Down | 5.37E-91  | 1.02E-89  |
| Unigene3249  | Potri.006G277200.2 | 7.6052  | 20.3535  | -1.4202 | Down | 5.20E-28  | 2.98E-27  |
| Unigene49989 | Potri.002G211800.1 | 18.3863 | 49.2064  | -1.4202 | Down | 2.38E-54  | 2.53E-53  |
| Unigene31981 | Potri.010G063600.3 | 7.6149  | 20.3805  | -1.4203 | Down | 1.69E-49  | 1.63E-48  |
| Unigene43765 | Potri.004G043200.2 | 40.4402 | 108.2327 | -1.4203 | Down | 3.06E-176 | 1.35E-174 |
| Unigene5970  | Potri.010G046700.1 | 8.4037  | 22.4954  | -1.4205 | Down | 1.77E-23  | 8.83E-23  |
| Unigene54319 | Potri.008G130600.1 | 8.2605  | 22.1121  | -1.4205 | Down | 1.77E-23  | 8.83E-23  |
| Unigene26411 | Potri.019G109100.1 | 5.9752  | 15.9961  | -1.4207 | Down | 5.31E-07  | 1.25E-06  |
| Unigene50098 | Potri.008G041900.1 | 8.1364  | 21.783   | -1.4207 | Down | 2.44E-74  | 3.67E-73  |
| Unigene20322 | Potri.005G230500.4 | 4.3648  | 11.6851  | -1.4207 | Down | 5.31E-07  | 1.25E-06  |
| Unigene15875 | Potri.002G125700.1 | 12.2273 | 32.7336  | -1.4207 | Down | 3.00E-18  | 1.25E-17  |
| Unigene20521 | Potri.002G076600.1 | 7.5207  | 20.1335  | -1.4207 | Down | 3.00E-18  | 1.25E-17  |
| Unigene44822 | Potri.001G467400.3 | 8.4115  | 22.5184  | -1.4207 | Down | 6.31E-35  | 4.36E-34  |
| Unigene18149 | Potri.001G378500.1 | 2.3401  | 6.2646   | -1.4207 | Down | 5.31E-07  | 1.25E-06  |
| Unigene39465 | Potri.003G115500.3 | 7.9886  | 21.3899  | -1.4209 | Down | 1.67E-24  | 8.59E-24  |
| Unigene42885 | Potri.013G071800.1 | 4.7484  | 12.7153  | -1.4211 | Down | 4.65E-77  | 7.30E-76  |
| Unigene4982  | Potri.005G185200.1 | 38.7841 | 103.8618 | -1.4211 | Down | 7.13E-72  | 1.03E-70  |
| Unigene25656 | Potri.014G000500.1 | 4.3808  | 11.7319  | -1.4212 | Down | 2.36E-07  | 5.70E-07  |
| Unigene36925 | Potri.017G001200.3 | 42.6091 | 114.1203 | -1.4213 | Down | 1.26E-55  | 1.38E-54  |
| Unigene47621 | Potri.014G076300.5 | 37.2995 | 99.8989  | -1.4213 | Down | 1.94E-79  | 3.15E-78  |
| Unigene29538 | Potri.009G071700.2 | 9.196   | 24.6296  | -1.4213 | Down | 1.27E-19  | 5.58E-19  |
| Unigene22666 | Potri.004G102000.1 | 12.7207 | 34.0684  | -1.4213 | Down | 1.99E-31  | 1.26E-30  |
| Unigene6879  | Potri.017G094000.1 | 19.7983 | 53.0303  | -1.4214 | Down | 4.13E-32  | 2.66E-31  |
| Unigene41688 | Potri.015G004400.2 | 6.7989  | 18.2105  | -1.4214 | Down | 1.09E-13  | 3.74E-13  |
| Unigene52502 | Potri.005G255000.1 | 5.3653  | 14.3717  | -1.4215 | Down | 3.24E-26  | 1.76E-25  |
| Unigene49050 | Potri.013G075500.1 | 23.9434 | 64.1384  | -1.4216 | Down | 4.07E-51  | 4.07E-50  |
| Unigene12082 | Potri.010G225100.1 | 6.0663  | 16.2507  | -1.4216 | Down | 4.91E-14  | 1.71E-13  |
| Unigene88700 | Potri.010G093700.3 | 12.2131 | 32.7172  | -1.4216 | Down | 2.62E-20  | 1.18E-19  |
| Unigene20914 | Potri.003G090900.1 | 4.7754  | 12.7925  | -1.4216 | Down | 1.05E-07  | 2.61E-07  |

|               |                    |         |          |         |      |           |           |
|---------------|--------------------|---------|----------|---------|------|-----------|-----------|
| Unigene39851  | Potri.002G036000.3 | 4.6856  | 12.5537  | -1.4218 | Down | 2.22E-14  | 7.87E-14  |
| Unigene90554  | Potri.013G062500.3 | 3.7686  | 10.0984  | -1.422  | Down | 4.71E-08  | 1.19E-07  |
| Unigene25854  | Potri.010G255400.7 | 2.607   | 6.9856   | -1.422  | Down | 4.71E-08  | 1.19E-07  |
| Unigene54262  | Potri.008G196500.1 | 6.5823  | 17.6379  | -1.422  | Down | 4.71E-08  | 1.19E-07  |
| Unigene11929  | Potri.006G255700.3 | 15.7155 | 42.1141  | -1.4221 | Down | 2.88E-28  | 1.66E-27  |
| Unigene216    | Potri.005G026800.1 | 11.5661 | 30.9938  | -1.4221 | Down | 3.52E-127 | 1.02E-125 |
| Unigene33325  | Potri.007G044300.1 | 40.8239 | 109.4018 | -1.4222 | Down | 3.67E-95  | 7.37E-94  |
| Unigene32270  | Potri.006G220600.1 | 9.5488  | 25.5896  | -1.4222 | Down | 4.83E-102 | 1.06E-100 |
| Unigene13242  | Potri.018G149500.3 | 11.0619 | 29.6464  | -1.4223 | Down | 5.05E-22  | 2.40E-21  |
| Unigene42377  | Potri.015G069100.1 | 10.707  | 28.697   | -1.4223 | Down | 4.66E-125 | 1.32E-123 |
| Unigene34119  | Potri.019G010200.1 | 25.0702 | 67.1949  | -1.4224 | Down | 3.31E-36  | 2.37E-35  |
| Unigene9935   | Potri.007G027400.1 | 29.2219 | 78.3228  | -1.4224 | Down | 4.12E-43  | 3.47E-42  |
| Unigene12048  | Potri.006G135500.1 | 21.4624 | 57.5273  | -1.4224 | Down | 1.88E-43  | 1.60E-42  |
| Unigene23141  | Potri.001G276900.1 | 3.121   | 8.3651   | -1.4224 | Down | 2.11E-08  | 5.46E-08  |
| Unigene24270  | Potri.006G115000.1 | 5.7295  | 15.3576  | -1.4225 | Down | 1.78E-85  | 3.16E-84  |
| Unigene84428  | Potri.001G172400.1 | 39.3121 | 105.3778 | -1.4225 | Down | 4.95E-51  | 4.93E-50  |
| Unigene37611  | Potri.016G078100.1 | 65.1391 | 174.6212 | -1.4226 | Down | 2.83E-123 | 7.86E-122 |
| Unigene16141  | Potri.003G194600.7 | 12.384  | 33.1965  | -1.4226 | Down | 9.30E-16  | 3.50E-15  |
| Unigene29772  | Potri.016G097300.2 | 5.2074  | 13.9604  | -1.4227 | Down | 9.43E-09  | 2.50E-08  |
| Unigene38743  | Potri.012G057100.2 | 3.6535  | 9.7946   | -1.4227 | Down | 9.43E-09  | 2.50E-08  |
| Unigene7904   | Potri.010G150000.4 | 4.8973  | 13.1292  | -1.4227 | Down | 4.21E-16  | 1.61E-15  |
| Unigene21058  | Potri.008G164400.1 | 4.4739  | 11.9939  | -1.4227 | Down | 4.21E-16  | 1.61E-15  |
| Unigene39018  | Potri.003G064100.2 | 7.5566  | 20.2583  | -1.4227 | Down | 1.17E-30  | 7.22E-30  |
| Unigene109406 | Potri.001G161100.1 | 7.4948  | 20.0926  | -1.4227 | Down | 9.43E-09  | 2.50E-08  |
| Unigene22985  | Potri.013G084900.1 | 7.8869  | 21.1467  | -1.4229 | Down | 4.45E-24  | 2.27E-23  |
| Unigene34881  | Potri.005G250300.1 | 9.4854  | 25.4327  | -1.4229 | Down | 4.45E-24  | 2.27E-23  |
| Unigene24780  | Potri.002G172700.1 | 5.1301  | 13.7552  | -1.4229 | Down | 4.45E-24  | 2.27E-23  |
| Unigene40648  | Potri.015G017500.1 | 10.5898 | 28.3959  | -1.423  | Down | 8.64E-17  | 3.40E-16  |
| Unigene21402  | Potri.004G034900.1 | 3.0385  | 8.1476   | -1.423  | Down | 1.29E-39  | 9.99E-39  |
| Unigene24038  | Potri.001G298700.1 | 7.1555  | 19.1879  | -1.4231 | Down | 1.34E-70  | 1.90E-69  |
| Unigene43003  | Potri.016G102900.1 | 21.1081 | 56.6082  | -1.4232 | Down | 1.65E-181 | 7.61E-180 |
| Unigene24186  | Potri.014G013100.1 | 10.7737 | 28.8923  | -1.4232 | Down | 5.42E-95  | 1.08E-93  |
| Unigene4314   | Potri.004G052300.2 | 14.609  | 39.1806  | -1.4233 | Down | 1.78E-17  | 7.18E-17  |
| Unigene39115  | Potri.004G035200.2 | 5.7011  | 15.29    | -1.4233 | Down | 1.78E-17  | 7.18E-17  |
| Unigene36769  | Potri.001G261700.1 | 5.3611  | 14.3782  | -1.4233 | Down | 1.90E-09  | 5.24E-09  |
| Unigene6719   | Potri.008G094600.1 | 27.7946 | 74.5521  | -1.4234 | Down | 8.98E-67  | 1.20E-65  |
| Unigene46009  | Potri.005G205300.1 | 12.4332 | 33.3472  | -1.4234 | Down | 8.67E-26  | 4.64E-25  |
| Unigene24244  | Potri.008G039400.1 | 5.9924  | 16.0741  | -1.4235 | Down | 1.79E-26  | 9.82E-26  |
| Unigene42753  | Potri.005G094300.1 | 23.8626 | 64.0103  | -1.4236 | Down | 7.99E-126 | 2.28E-124 |

|               |                    |         |          |         |      |           |           |
|---------------|--------------------|---------|----------|---------|------|-----------|-----------|
| Unigene86750  | Potri.001G391900.5 | 24.6226 | 66.0561  | -1.4237 | Down | 8.84E-36  | 6.25E-35  |
| Unigene34476  | Potri.011G103200.1 | 3.4822  | 9.3429   | -1.4239 | Down | 3.41E-19  | 1.47E-18  |
| Unigene21620  | Potri.010G146000.3 | 2.6394  | 7.082    | -1.4239 | Down | 1.55E-19  | 6.77E-19  |
| Unigene41535  | Potri.010G056900.5 | 13.6111 | 36.5192  | -1.4239 | Down | 3.41E-19  | 1.47E-18  |
| Unigene85969  | Potri.008G116800.4 | 71.9528 | 193.0519 | -1.4239 | Down | 5.75E-98  | 1.20E-96  |
| Unigene16260  | Potri.003G019600.1 | 26.1594 | 70.1902  | -1.4239 | Down | 4.29E-46  | 3.86E-45  |
| Unigene29513  | Potri.013G115300.2 | 3.9856  | 10.6944  | -1.424  | Down | 1.72E-10  | 5.04E-10  |
| Unigene16117  | Potri.009G104300.1 | 48.1242 | 129.1266 | -1.424  | Down | 5.75E-64  | 7.33E-63  |
| Unigene3898   | Potri.005G145400.2 | 17.2653 | 46.327   | -1.424  | Down | 1.55E-19  | 6.77E-19  |
| Unigene23469  | Potri.T093400.1    | 27.8237 | 74.6654  | -1.4241 | Down | 1.00E-102 | 2.22E-101 |
| Unigene14025  | Potri.016G066400.2 | 36.4857 | 97.9058  | -1.4241 | Down | 4.08E-47  | 3.76E-46  |
| Unigene42422  | Potri.008G211400.3 | 8.7048  | 23.3589  | -1.4241 | Down | 1.14E-65  | 1.50E-64  |
| Unigene18814  | Potri.012G097000.1 | 4.3695  | 11.726   | -1.4242 | Down | 3.18E-20  | 1.43E-19  |
| Unigene30427  | Potri.006G138000.1 | 4.4023  | 11.8141  | -1.4242 | Down | 7.73E-11  | 2.31E-10  |
| Unigene81823  | Potri.019G116800.1 | 50.2165 | 134.7846 | -1.4244 | Down | 3.86E-60  | 4.61E-59  |
| Unigene21465  | Potri.015G058200.1 | 4.5526  | 12.2191  | -1.4244 | Down | 7.68E-50  | 7.48E-49  |
| Unigene110914 | Potri.005G210500.1 | 9.366   | 25.1379  | -1.4244 | Down | 3.48E-11  | 1.06E-10  |
| Unigene31880  | Potri.004G022500.1 | 9.7248  | 26.1009  | -1.4244 | Down | 1.12E-78  | 1.80E-77  |
| Unigene60410  | Potri.016G008700.1 | 11.4162 | 30.6425  | -1.4245 | Down | 2.98E-21  | 1.38E-20  |
| Unigene76380  | Potri.011G043200.1 | 9.7375  | 26.1382  | -1.4245 | Down | 1.57E-11  | 4.86E-11  |
| Unigene16322  | Potri.016G086600.1 | 3.4474  | 9.2548   | -1.4247 | Down | 1.27E-32  | 8.27E-32  |
| Unigene40953  | Potri.013G031700.1 | 24.5312 | 65.8561  | -1.4247 | Down | 6.09E-43  | 5.11E-42  |
| Unigene50839  | Potri.019G018400.1 | 5.0104  | 13.4522  | -1.4248 | Down | 3.19E-12  | 1.02E-11  |
| Unigene23308  | Potri.018G020400.3 | 20.3632 | 54.6689  | -1.4248 | Down | 6.29E-54  | 6.65E-53  |
| Unigene88986  | Potri.017G050500.1 | 40.6511 | 109.1407 | -1.4248 | Down | 3.04E-65  | 3.96E-64  |
| Unigene53455  | Potri.002G166500.1 | 7.1708  | 19.2515  | -1.4248 | Down | 1.27E-22  | 6.15E-22  |
| Unigene42474  | Potri.016G112800.4 | 6.8112  | 18.2872  | -1.4249 | Down | 1.20E-33  | 8.03E-33  |
| Unigene11962  | Potri.005G036300.1 | 6.9903  | 18.7688  | -1.4249 | Down | 2.62E-23  | 1.30E-22  |
| Unigene49129  | Potri.004G013600.1 | 10.2895 | 27.6273  | -1.4249 | Down | 2.62E-23  | 1.30E-22  |
| Unigene53193  | Potri.013G118000.6 | 19.5522 | 52.5     | -1.425  | Down | 1.19E-23  | 5.98E-23  |
| Unigene28822  | Potri.015G064600.1 | 8.9846  | 24.1258  | -1.4251 | Down | 5.42E-24  | 2.75E-23  |
| Unigene5889   | Potri.012G069700.1 | 24.742  | 66.4395  | -1.4251 | Down | 2.36E-35  | 1.65E-34  |
| Unigene28779  | Potri.002G005100.2 | 5.719   | 15.3583  | -1.4252 | Down | 1.12E-24  | 5.81E-24  |
| Unigene98899  | Potri.008G112000.7 | 5.339   | 14.3406  | -1.4255 | Down | 5.98E-14  | 2.08E-13  |
| Unigene1383   | Potri.005G180700.1 | 13.569  | 36.4486  | -1.4255 | Down | 1.90E-39  | 1.47E-38  |
| Unigene41327  | Potri.015G146500.1 | 8.5902  | 23.076   | -1.4256 | Down | 2.05E-27  | 1.16E-26  |
| Unigene19936  | Potri.003G063300.2 | 8.6609  | 23.2651  | -1.4256 | Down | 2.70E-14  | 9.55E-14  |
| Unigene43512  | Potri.012G034800.1 | 13.5233 | 36.3286  | -1.4257 | Down | 1.67E-53  | 1.76E-52  |
| Unigene8004   | Potri.018G149100.2 | 22.6231 | 60.7792  | -1.4258 | Down | 3.32E-55  | 3.61E-54  |

|              |                    |         |          |         |      |           |           |
|--------------|--------------------|---------|----------|---------|------|-----------|-----------|
| Unigene17068 | Potri.013G067700.1 | 3.1925  | 8.5769   | -1.4258 | Down | 1.94E-28  | 1.12E-27  |
| Unigene44750 | Potri.010G124800.1 | 7.6309  | 20.502   | -1.4258 | Down | 1.62E-42  | 1.35E-41  |
| Unigene13057 | Potri.005G152100.1 | 3.3813  | 9.0844   | -1.4258 | Down | 8.82E-29  | 5.17E-28  |
| Unigene25520 | Potri.003G217200.1 | 36.1693 | 97.1751  | -1.4258 | Down | 6.93E-56  | 7.63E-55  |
| Unigene15400 | Potri.011G110900.4 | 63.2554 | 169.9586 | -1.4259 | Down | 5.27E-113 | 1.31E-111 |
| Unigene51048 | Potri.010G210100.1 | 18.4278 | 49.5139  | -1.4259 | Down | 8.32E-30  | 5.02E-29  |
| Unigene50183 | Potri.004G053200.1 | 2.9329  | 7.8809   | -1.426  | Down | 5.13E-16  | 1.95E-15  |
| Unigene41541 | Potri.019G072700.2 | 3.4267  | 9.2082   | -1.4261 | Down | 2.32E-16  | 8.98E-16  |
| Unigene48861 | Potri.015G072900.1 | 18.8666 | 50.6988  | -1.4261 | Down | 3.58E-31  | 2.24E-30  |
| Unigene61331 | Potri.T119200.2    | 6.9841  | 18.7696  | -1.4263 | Down | 4.77E-17  | 1.90E-16  |
| Unigene296   | Potri.013G002600.1 | 4.4838  | 12.0503  | -1.4263 | Down | 4.77E-17  | 1.90E-16  |
| Unigene42683 | Potri.012G054700.2 | 2.6419  | 7.1005   | -1.4263 | Down | 2.16E-17  | 8.71E-17  |
| Unigene15    | Potri.010G216900.3 | 10.5412 | 28.3293  | -1.4263 | Down | 4.77E-17  | 1.90E-16  |
| Unigene3369  | Potri.010G110400.9 | 50.5813 | 135.9381 | -1.4263 | Down | 4.19E-79  | 6.78E-78  |
| Unigene31017 | Potri.002G090900.4 | 11.7723 | 31.6408  | -1.4264 | Down | 9.80E-18  | 4.00E-17  |
| Unigene11412 | Potri.010G153100.3 | 9.7168  | 26.1197  | -1.4266 | Down | 3.68E-139 | 1.19E-137 |
| Unigene6661  | Potri.008G120100.2 | 22.6881 | 60.9898  | -1.4266 | Down | 4.24E-54  | 4.49E-53  |
| Unigene19844 | Potri.003G117400.2 | 11.2792 | 30.3194  | -1.4266 | Down | 9.13E-19  | 3.88E-18  |
| Unigene15866 | Potri.001G073800.2 | 12.8921 | 34.6564  | -1.4266 | Down | 4.14E-19  | 1.79E-18  |
| Unigene18492 | Potri.002G126700.1 | 3.7913  | 10.1922  | -1.4267 | Down | 1.88E-19  | 8.20E-19  |
| Unigene15496 | Potri.011G119600.1 | 13.7914 | 37.0785  | -1.4268 | Down | 5.06E-39  | 3.88E-38  |
| Unigene5325  | Potri.010G036500.7 | 16.9402 | 45.5432  | -1.4268 | Down | 3.87E-20  | 1.73E-19  |
| Unigene18137 | Potri.003G009000.1 | 21.5579 | 57.9621  | -1.4269 | Down | 1.52E-59  | 1.79E-58  |
| Unigene35917 | Potri.001G234300.1 | 15.2108 | 40.8977  | -1.4269 | Down | 9.98E-41  | 7.96E-40  |
| Unigene29729 | Potri.001G182700.5 | 14.3554 | 38.5989  | -1.427  | Down | 1.65E-21  | 7.70E-21  |
| Unigene72193 | Potri.016G002100.1 | 22.9954 | 61.8384  | -1.4272 | Down | 3.19E-23  | 1.58E-22  |
| Unigene23600 | Potri.T034400.2    | 11.6535 | 31.3417  | -1.4273 | Down | 3.17E-48  | 2.99E-47  |
| Unigene1830  | Potri.011G164900.1 | 15.8451 | 42.615   | -1.4273 | Down | 3.17E-48  | 2.99E-47  |
| Unigene28996 | Potri.010G135700.1 | 12.6465 | 34.013   | -1.4273 | Down | 3.91E-72  | 5.68E-71  |
| Unigene45642 | Potri.001G081300.1 | 10.879  | 29.2576  | -1.4273 | Down | 3.00E-24  | 1.53E-23  |
| Unigene33550 | Potri.016G005400.2 | 12.8274 | 34.5005  | -1.4274 | Down | 1.28E-25  | 6.83E-25  |
| Unigene11558 | Potri.006G096700.1 | 3.1827  | 8.56     | -1.4274 | Down | 2.82E-25  | 1.49E-24  |
| Unigene22920 | Potri.006G234500.2 | 10.8125 | 29.0835  | -1.4275 | Down | 5.49E-27  | 3.05E-26  |
| Unigene48553 | Potri.001G084700.3 | 15.4809 | 41.6404  | -1.4275 | Down | 5.49E-27  | 3.05E-26  |
| Unigene23657 | Potri.007G093200.5 | 12.8317 | 34.5181  | -1.4276 | Down | 2.13E-56  | 2.37E-55  |
| Unigene6338  | Potri.001G230000.1 | 73.7987 | 198.5115 | -1.4276 | Down | 5.89E-80  | 9.66E-79  |
| Unigene53608 | Potri.013G100500.2 | 27.8081 | 74.8091  | -1.4277 | Down | 4.60E-30  | 2.80E-29  |
| Unigene8063  | Potri.008G200400.1 | 9.9712  | 26.828   | -1.4279 | Down | 8.07E-34  | 5.42E-33  |
| Unigene7080  | Potri.009G026200.5 | 21.507  | 57.8712  | -1.428  | Down | 6.84E-37  | 4.98E-36  |

|               |                     |         |          |         |      |          |          |
|---------------|---------------------|---------|----------|---------|------|----------|----------|
| Unigene11316  | Potri.015G056000.1  | 6.6844  | 17.9883  | -1.4282 | Down | 5.53E-41 | 4.44E-40 |
| Unigene3251   | Potri.012G102800.2  | 10.5856 | 28.487   | -1.4282 | Down | 2.52E-41 | 2.04E-40 |
| Unigene27883  | Potri.012G066900.1  | 29.1811 | 78.5355  | -1.4283 | Down | 4.73E-89 | 8.76E-88 |
| Unigene35515  | Potri.009G119500.1  | 37.443  | 100.7721 | -1.4283 | Down | 4.27E-46 | 3.84E-45 |
| Unigene29079  | Potri.002G137000.4  | 11.2904 | 30.3851  | -1.4283 | Down | 1.04E-43 | 8.84E-43 |
| Unigene40396  | Potri.019G129100.1  | 3.8737  | 10.4333  | -1.4294 | Down | 3.89E-12 | 1.24E-11 |
| Unigene44832  | Potri.019G105100.1  | 3.9096  | 10.5301  | -1.4294 | Down | 3.29E-14 | 1.16E-13 |
| Unigene116276 | Potri.019G068200.1  | 1.9006  | 5.1191   | -1.4294 | Down | 4.61E-04 | 8.19E-04 |
| Unigene67835  | Potri.018G115400.1  | 1.504   | 4.0509   | -1.4294 | Down | 8.74E-05 | 1.69E-04 |
| Unigene37993  | Potri.018G063700.4  | 3.7892  | 10.2058  | -1.4294 | Down | 6.50E-07 | 1.51E-06 |
| Unigene48759  | Potri.018G024400.1  | 1.9743  | 5.3175   | -1.4294 | Down | 3.30E-06 | 7.28E-06 |
| Unigene3533   | Potri.017G152600.1  | 2.8831  | 7.7653   | -1.4294 | Down | 4.61E-04 | 8.19E-04 |
| Unigene90334  | Potri.017G042900.1  | 17.3212 | 46.653   | -1.4294 | Down | 1.10E-31 | 6.98E-31 |
| Unigene1140   | Potri.017G017400.2  | 3.8553  | 10.3838  | -1.4294 | Down | 3.05E-15 | 1.12E-14 |
| Unigene6412   | Potri.016G117800.1  | 2.5577  | 6.8889   | -1.4294 | Down | 1.69E-05 | 3.48E-05 |
| Unigene17459  | Potri.015G020800.1  | 12.7234 | 34.2693  | -1.4294 | Down | 4.47E-34 | 3.02E-33 |
| Unigene50686  | Potri.014G196700.1  | 7.7171  | 20.7855  | -1.4294 | Down | 3.88E-23 | 1.91E-22 |
| Unigene10562  | Potri.014G138400.1  | 13.0465 | 35.1395  | -1.4294 | Down | 6.74E-15 | 2.44E-14 |
| Unigene118887 | Potri.014G089600.1  | 1.3037  | 3.5113   | -1.4294 | Down | 2.00E-04 | 3.72E-04 |
| Unigene52811  | Potri.014G047200.3  | 8.3196  | 22.4081  | -1.4294 | Down | 8.62E-12 | 2.71E-11 |
| Unigene102728 | Potri.013G012100.1  | 4.3147  | 11.6213  | -1.4294 | Down | 1.49E-14 | 5.32E-14 |
| Unigene101335 | Potri.012G058800.1  | 2.4684  | 6.6483   | -1.4294 | Down | 2.00E-04 | 3.72E-04 |
| Unigene46874  | Potri.012G041800.6  | 2.6964  | 7.2624   | -1.4294 | Down | 2.00E-04 | 3.72E-04 |
| Unigene90229  | Potri.011G165100.1  | 1.7856  | 4.8094   | -1.4294 | Down | 2.00E-04 | 3.72E-04 |
| Unigene51734  | Potri.011G000100.9  | 9.3821  | 25.2698  | -1.4294 | Down | 1.38E-15 | 5.15E-15 |
| Unigene50911  | Potri.010G219800.1  | 2.3589  | 6.3534   | -1.4294 | Down | 4.61E-04 | 8.19E-04 |
| Unigene12496  | Potri.010G178600.1  | 9.6659  | 26.0343  | -1.4294 | Down | 5.74E-44 | 4.92E-43 |
| Unigene66605  | Potri.010G175500.11 | 6.9969  | 18.8455  | -1.4294 | Down | 7.53E-25 | 3.92E-24 |
| Unigene108787 | Potri.010G162900.1  | 6.039   | 16.2654  | -1.4294 | Down | 2.89E-07 | 6.93E-07 |
| Unigene33411  | Potri.010G066300.1  | 2.1728  | 5.8522   | -1.4294 | Down | 1.69E-05 | 3.48E-05 |
| Unigene13832  | Potri.010G026800.1  | 6.3854  | 17.1986  | -1.4294 | Down | 3.79E-37 | 2.78E-36 |
| Unigene51219  | Potri.009G163400.2  | 12.5906 | 33.9116  | -1.4294 | Down | 3.05E-15 | 1.12E-14 |
| Unigene69954  | Potri.009G157500.3  | 2.8692  | 7.7279   | -1.4294 | Down | 8.62E-12 | 2.71E-11 |
| Unigene3145   | Potri.009G146400.2  | 10.0422 | 27.0477  | -1.4294 | Down | 3.47E-54 | 3.68E-53 |
| Unigene59847  | Potri.009G102900.1  | 5.5348  | 14.9074  | -1.4294 | Down | 2.31E-09 | 6.37E-09 |
| Unigene111035 | Potri.009G060700.2  | 12.7604 | 34.3689  | -1.4294 | Down | 6.74E-15 | 2.44E-14 |
| Unigene36777  | Potri.009G050600.1  | 2.5948  | 6.9887   | -1.4294 | Down | 1.69E-05 | 3.48E-05 |
| Unigene951    | Potri.009G016300.1  | 13.5571 | 36.5148  | -1.4294 | Down | 1.85E-67 | 2.50E-66 |
| Unigene32575  | Potri.008G195300.5  | 3.1804  | 8.566    | -1.4294 | Down | 4.41E-21 | 2.03E-20 |

|               |                    |         |          |         |      |           |           |
|---------------|--------------------|---------|----------|---------|------|-----------|-----------|
| Unigene41304  | Potri.008G186200.5 | 1.2617  | 3.3983   | -1.4294 | Down | 4.61E-04  | 8.19E-04  |
| Unigene26873  | Potri.008G181200.2 | 8.5113  | 22.9244  | -1.4294 | Down | 5.04E-19  | 2.17E-18  |
| Unigene47244  | Potri.008G155500.1 | 9.4778  | 25.5275  | -1.4294 | Down | 3.89E-12  | 1.24E-11  |
| Unigene19795  | Potri.008G095300.1 | 4.1175  | 11.0901  | -1.4294 | Down | 2.89E-07  | 6.93E-07  |
| Unigene50980  | Potri.008G044400.1 | 9.8734  | 26.5932  | -1.4294 | Down | 7.29E-14  | 2.53E-13  |
| Unigene11111  | Potri.007G082400.1 | 2.9146  | 7.8503   | -1.4294 | Down | 3.29E-14  | 1.16E-13  |
| Unigene7123   | Potri.007G057600.3 | 24.6152 | 66.2988  | -1.4294 | Down | 4.23E-35  | 2.93E-34  |
| Unigene16508  | Potri.006G189500.1 | 7.9361  | 21.3751  | -1.4294 | Down | 4.67E-10  | 1.34E-09  |
| Unigene13083  | Potri.006G165100.2 | 8.5425  | 23.0085  | -1.4294 | Down | 4.00E-36  | 2.86E-35  |
| Unigene92523  | Potri.006G135500.1 | 1.5445  | 4.16     | -1.4294 | Down | 8.74E-05  | 1.69E-04  |
| Unigene2451   | Potri.006G085700.1 | 17.8453 | 48.0647  | -1.4294 | Down | 2.76E-43  | 2.33E-42  |
| Unigene4747   | Potri.006G075500.3 | 1.4564  | 3.9226   | -1.4294 | Down | 2.00E-04  | 3.72E-04  |
| Unigene19940  | Potri.006G055400.5 | 2.4459  | 6.5877   | -1.4294 | Down | 6.50E-07  | 1.51E-06  |
| Unigene44357  | Potri.005G210400.1 | 12.1884 | 32.8285  | -1.4294 | Down | 5.60E-30  | 3.39E-29  |
| Unigene7560   | Potri.005G203100.6 | 1.4439  | 3.8889   | -1.4294 | Down | 1.46E-06  | 3.32E-06  |
| Unigene39108  | Potri.005G158400.1 | 8.2652  | 22.2617  | -1.4294 | Down | 6.74E-15  | 2.44E-14  |
| Unigene7409   | Potri.005G155600.1 | 8.2679  | 22.2689  | -1.4294 | Down | 1.28E-16  | 5.00E-16  |
| Unigene46633  | Potri.005G108100.1 | 43.5884 | 117.4015 | -1.4294 | Down | 1.73E-138 | 5.60E-137 |
| Unigene49222  | Potri.005G099400.1 | 1.7762  | 4.784    | -1.4294 | Down | 2.00E-04  | 3.72E-04  |
| Unigene71353  | Potri.005G097500.5 | 9.1871  | 24.7446  | -1.4294 | Down | 4.67E-10  | 1.34E-09  |
| Unigene13961  | Potri.005G092100.1 | 2.4526  | 6.6058   | -1.4294 | Down | 1.04E-09  | 2.91E-09  |
| Unigene46307  | Potri.005G049100.3 | 3.799   | 10.2323  | -1.4294 | Down | 3.83E-05  | 7.67E-05  |
| Unigene98680  | Potri.005G010500.1 | 1.8298  | 4.9284   | -1.4294 | Down | 7.45E-06  | 1.60E-05  |
| Unigene28716  | Potri.004G227700.7 | 3.6272  | 9.7695   | -1.4294 | Down | 8.62E-12  | 2.71E-11  |
| Unigene52470  | Potri.004G187500.1 | 7.56    | 20.3621  | -1.4294 | Down | 7.53E-25  | 3.92E-24  |
| Unigene43336  | Potri.004G139700.1 | 2.7182  | 7.3212   | -1.4294 | Down | 5.80E-17  | 2.30E-16  |
| Unigene15463  | Potri.004G007500.1 | 11.4768 | 30.9117  | -1.4294 | Down | 2.00E-21  | 9.34E-21  |
| Unigene21149  | Potri.003G149600.2 | 2.2     | 5.9254   | -1.4294 | Down | 3.83E-05  | 7.67E-05  |
| Unigene52717  | Potri.003G133100.1 | 5.1895  | 13.9775  | -1.4294 | Down | 6.50E-07  | 1.51E-06  |
| Unigene12996  | Potri.003G133100.1 | 4.2955  | 11.5696  | -1.4294 | Down | 4.13E-22  | 1.97E-21  |
| Unigene81335  | Potri.003G086000.1 | 2.6433  | 7.1194   | -1.4294 | Down | 2.00E-04  | 3.72E-04  |
| Unigene29486  | Potri.002G255500.1 | 3.1766  | 8.5559   | -1.4294 | Down | 3.89E-12  | 1.24E-11  |
| Unigene30386  | Potri.002G234500.2 | 7.8705  | 21.1986  | -1.4294 | Down | 2.31E-09  | 6.37E-09  |
| Unigene53160  | Potri.002G217600.1 | 2.857   | 7.695    | -1.4294 | Down | 2.00E-04  | 3.72E-04  |
| Unigene8705   | Potri.002G175300.1 | 2.118   | 5.7045   | -1.4294 | Down | 2.00E-04  | 3.72E-04  |
| Unigene39466  | Potri.002G159900.2 | 8.4236  | 22.6883  | -1.4294 | Down | 6.37E-42  | 5.23E-41  |
| Unigene45951  | Potri.002G144000.1 | 3.0065  | 8.0978   | -1.4294 | Down | 6.50E-07  | 1.51E-06  |
| Unigene51591  | Potri.002G129100.2 | 2.7326  | 7.3599   | -1.4294 | Down | 8.74E-05  | 1.69E-04  |
| Unigene107129 | Potri.002G055800.3 | 1.2964  | 3.4916   | -1.4294 | Down | 3.83E-05  | 7.67E-05  |



|               |                    |         |          |         |      |           |           |
|---------------|--------------------|---------|----------|---------|------|-----------|-----------|
| Unigene49515  | Potri.002G049800.2 | 21.7581 | 58.6034  | -1.4294 | Down | 2.55E-30  | 1.56E-29  |
| Unigene13960  | Potri.001G455300.3 | 3.3833  | 9.1126   | -1.4294 | Down | 1.88E-22  | 9.05E-22  |
| Unigene81178  | Potri.001G419300.1 | 2.3589  | 6.3534   | -1.4294 | Down | 4.61E-04  | 8.19E-04  |
| Unigene24658  | Potri.001G394000.4 | 5.2248  | 14.0726  | -1.4294 | Down | 1.29E-07  | 3.17E-07  |
| Unigene47776  | Potri.001G267400.2 | 9.0729  | 24.4369  | -1.4294 | Down | 9.43E-11  | 2.81E-10  |
| Unigene105222 | Potri.001G222400.1 | 1.2845  | 3.4597   | -1.4294 | Down | 7.45E-06  | 1.60E-05  |
| Unigene13346  | Potri.001G215200.2 | 8.7544  | 23.5791  | -1.4294 | Down | 1.40E-41  | 1.14E-40  |
| Unigene53868  | Potri.001G182700.5 | 16.0738 | 43.2935  | -1.4294 | Down | 2.86E-28  | 1.65E-27  |
| Unigene36896  | Potri.001G156000.1 | 6.9562  | 18.7359  | -1.4294 | Down | 1.91E-11  | 5.90E-11  |
| Unigene53056  | Potri.001G142600.1 | 3.2124  | 8.6523   | -1.4294 | Down | 2.00E-04  | 3.72E-04  |
| Unigene8624   | Potri.001G135300.3 | 2.3808  | 6.4125   | -1.4294 | Down | 2.00E-04  | 3.72E-04  |
| Unigene3374   | Potri.001G123400.5 | 18.3971 | 49.5509  | -1.4294 | Down | 1.04E-32  | 6.78E-32  |
| Unigene43979  | Potri.001G004800.1 | 7.3358  | 19.7582  | -1.4294 | Down | 8.01E-24  | 4.04E-23  |
| Unigene45981  | Potri.015G140100.1 | 4.6624  | 12.5579  | -1.4295 | Down | 4.67E-10  | 1.34E-09  |
| Unigene6927   | Potri.015G116300.1 | 2.3345  | 6.2879   | -1.4295 | Down | 5.16E-09  | 1.39E-08  |
| Unigene37149  | Potri.014G178500.2 | 3.4859  | 9.3891   | -1.4295 | Down | 8.74E-05  | 1.69E-04  |
| Unigene25630  | Potri.010G244500.1 | 1.7308  | 4.6619   | -1.4295 | Down | 8.74E-05  | 1.69E-04  |
| Unigene90692  | Potri.009G139900.1 | 1.7215  | 4.6368   | -1.4295 | Down | 2.00E-04  | 3.72E-04  |
| Unigene28003  | Potri.009G106700.1 | 1.9251  | 5.1852   | -1.4295 | Down | 6.50E-07  | 1.51E-06  |
| Unigene70110  | Potri.007G042900.1 | 1.2479  | 3.3612   | -1.4295 | Down | 2.00E-04  | 3.72E-04  |
| Unigene826    | Potri.006G238400.1 | 2.6032  | 7.0116   | -1.4295 | Down | 1.75E-12  | 5.70E-12  |
| Unigene54086  | Potri.006G230300.4 | 1.1732  | 3.16     | -1.4295 | Down | 1.69E-05  | 3.48E-05  |
| Unigene54054  | Potri.006G108400.1 | 2.3256  | 6.2639   | -1.4295 | Down | 7.45E-06  | 1.60E-05  |
| Unigene61680  | Potri.006G090400.2 | 1.6872  | 4.5444   | -1.4295 | Down | 3.30E-06  | 7.28E-06  |
| Unigene118429 | Potri.005G062000.1 | 1.3563  | 3.6532   | -1.4295 | Down | 4.61E-04  | 8.19E-04  |
| Unigene9401   | Potri.005G000700.1 | 2.065   | 5.562    | -1.4295 | Down | 4.61E-04  | 8.19E-04  |
| Unigene45499  | Potri.003G132900.1 | 2.7292  | 7.351    | -1.4295 | Down | 7.91E-13  | 2.61E-12  |
| Unigene8488   | Potri.003G068700.1 | 5.4169  | 14.5901  | -1.4295 | Down | 1.61E-13  | 5.51E-13  |
| Unigene105687 | Potri.002G180300.5 | 1.241   | 3.3426   | -1.4295 | Down | 2.00E-04  | 3.72E-04  |
| Unigene96646  | Potri.001G294200.3 | 1.9404  | 5.2264   | -1.4295 | Down | 2.00E-04  | 3.72E-04  |
| Unigene13465  | Potri.001G163900.1 | 2.3145  | 6.234    | -1.4295 | Down | 7.45E-06  | 1.60E-05  |
| Unigene17542  | Potri.001G143800.2 | 2.1267  | 5.7282   | -1.4295 | Down | 7.45E-06  | 1.60E-05  |
| Unigene31517  | Potri.017G071700.5 | 30.2166 | 81.4166  | -1.43   | Down | 7.38E-92  | 1.42E-90  |
| Unigene43854  | Potri.006G216400.1 | 34.2081 | 92.1726  | -1.43   | Down | 1.85E-88  | 3.40E-87  |
| Unigene42724  | Potri.002G214100.3 | 19.9926 | 53.8711  | -1.43   | Down | 1.17E-81  | 1.95E-80  |
| Unigene52314  | Potri.017G050500.1 | 47.4255 | 127.8055 | -1.4302 | Down | 8.63E-128 | 2.50E-126 |
| Unigene80034  | Potri.019G079500.1 | 44.6072 | 120.2276 | -1.4304 | Down | 1.02E-51  | 1.03E-50  |
| Unigene205    | Potri.010G034700.1 | 10.4148 | 28.07    | -1.4304 | Down | 2.39E-104 | 5.37E-103 |
| Unigene48881  | Potri.002G160900.4 | 31.925  | 86.045   | -1.4304 | Down | 2.12E-52  | 2.18E-51  |

|               |                    |          |          |         |      |           |           |
|---------------|--------------------|----------|----------|---------|------|-----------|-----------|
| Unigene239    | Potri.007G102000.1 | 5.5411   | 14.935   | -1.4305 | Down | 5.14E-50  | 5.02E-49  |
| Unigene15503  | Potri.005G161800.2 | 23.5092  | 63.3907  | -1.431  | Down | 2.76E-32  | 1.79E-31  |
| Unigene20103  | Potri.016G095900.5 | 16.588   | 44.7288  | -1.4311 | Down | 6.07E-32  | 3.89E-31  |
| Unigene1390   | Potri.012G065600.3 | 16.6506  | 44.9059  | -1.4313 | Down | 1.12E-53  | 1.18E-52  |
| Unigene19173  | Potri.010G199600.3 | 18.0443  | 48.6658  | -1.4314 | Down | 3.69E-27  | 2.06E-26  |
| Unigene19205  | Potri.004G042200.1 | 20.9276  | 56.4433  | -1.4314 | Down | 8.11E-27  | 4.49E-26  |
| Unigene47756  | Potri.012G074800.1 | 25.9232  | 69.9223  | -1.4315 | Down | 1.89E-25  | 1.00E-24  |
| Unigene31901  | Potri.007G021800.1 | 5.9629   | 16.0832  | -1.4315 | Down | 6.24E-50  | 6.08E-49  |
| Unigene93170  | Potri.018G114500.6 | 49.8245  | 134.4203 | -1.4318 | Down | 2.04E-125 | 5.79E-124 |
| Unigene21471  | Potri.011G110700.2 | 12.2397  | 33.0235  | -1.4319 | Down | 2.06E-41  | 1.67E-40  |
| Unigene119539 | Potri.014G132000.2 | 3.5603   | 9.6072   | -1.4321 | Down | 5.73E-20  | 2.55E-19  |
| Unigene491    | Potri.006G047700.2 | 7.8232   | 21.1096  | -1.4321 | Down | 2.92E-95  | 5.87E-94  |
| Unigene22010  | Potri.014G075800.1 | 36.1424  | 97.5298  | -1.4322 | Down | 1.53E-92  | 2.96E-91  |
| Unigene17590  | Potri.007G130800.1 | 4.9504   | 13.3599  | -1.4323 | Down | 6.13E-19  | 2.62E-18  |
| Unigene12121  | Potri.006G163900.1 | 8.6886   | 23.4492  | -1.4323 | Down | 1.35E-18  | 5.71E-18  |
| Unigene109822 | Potri.003G087600.2 | 16.5966  | 44.7936  | -1.4324 | Down | 2.98E-18  | 1.24E-17  |
| Unigene7798   | Potri.002G052900.3 | 6.8625   | 18.522   | -1.4324 | Down | 8.37E-68  | 1.14E-66  |
| Unigene2963   | Potri.017G106500.1 | 2.0538   | 5.5436   | -1.4325 | Down | 1.45E-17  | 5.89E-17  |
| Unigene45944  | Potri.001G405800.1 | 29.4635  | 79.5262  | -1.4325 | Down | 6.59E-34  | 4.44E-33  |
| Unigene89601  | Potri.002G257100.1 | 36.3645  | 98.1683  | -1.4327 | Down | 1.12E-61  | 1.36E-60  |
| Unigene27799  | Potri.012G135900.1 | 1.8865   | 5.0939   | -1.4331 | Down | 3.71E-15  | 1.36E-14  |
| Unigene7589   | Potri.T078200.1    | 42.7848  | 115.5498 | -1.4333 | Down | 2.59E-115 | 6.64E-114 |
| Unigene43391  | Potri.007G041300.1 | 10.0039  | 27.0177  | -1.4333 | Down | 1.27E-39  | 9.85E-39  |
| Unigene21303  | Potri.002G243600.3 | 8.1857   | 22.1063  | -1.4333 | Down | 3.61E-53  | 3.76E-52  |
| Unigene96517  | Potri.004G191700.1 | 51.7554  | 139.783  | -1.4334 | Down | 1.82E-51  | 1.83E-50  |
| Unigene80578  | Potri.001G403300.1 | 117.8905 | 318.4153 | -1.4335 | Down | 1.52E-136 | 4.81E-135 |
| Unigene616    | Potri.008G014400.1 | 2.7206   | 7.3489   | -1.4336 | Down | 1.96E-13  | 6.68E-13  |
| Unigene31586  | Potri.004G114800.2 | 10.0143  | 27.0507  | -1.4336 | Down | 1.96E-13  | 6.68E-13  |
| Unigene42495  | Potri.008G049700.6 | 5.7579   | 15.5541  | -1.4337 | Down | 5.06E-25  | 2.65E-24  |
| Unigene663    | Potri.006G081800.2 | 18.0819  | 48.8488  | -1.4338 | Down | 5.12E-70  | 7.20E-69  |
| Unigene52803  | Potri.016G105700.1 | 12.9386  | 34.9579  | -1.4339 | Down | 1.18E-23  | 5.94E-23  |
| Unigene63255  | Potri.009G027000.1 | 5.1448   | 13.9017  | -1.4341 | Down | 5.73E-23  | 2.81E-22  |
| Unigene71372  | Potri.T161800.1    | 22.4165  | 60.5747  | -1.4342 | Down | 1.26E-22  | 6.11E-22  |
| Unigene31167  | Potri.T012200.3    | 14.2094  | 38.3992  | -1.4342 | Down | 2.77E-22  | 1.33E-21  |
| Unigene11978  | Potri.008G174500.1 | 1.9976   | 5.398    | -1.4342 | Down | 4.73E-12  | 1.51E-11  |
| Unigene32915  | Potri.005G055800.1 | 7.5549   | 20.4151  | -1.4342 | Down | 1.42E-64  | 1.83E-63  |
| Unigene80411  | Potri.003G170000.3 | 63.9206  | 172.7316 | -1.4342 | Down | 1.08E-74  | 1.63E-73  |
| Unigene17548  | Potri.017G007100.1 | 3.4278   | 9.2639   | -1.4343 | Down | 1.05E-11  | 3.28E-11  |
| Unigene17834  | Potri.015G096200.1 | 4.8473   | 13.1     | -1.4343 | Down | 1.05E-11  | 3.28E-11  |

|               |                    |         |          |         |      |           |           |
|---------------|--------------------|---------|----------|---------|------|-----------|-----------|
| Unigene94748  | Potri.006G169200.1 | 3.5438  | 9.5772   | -1.4343 | Down | 1.05E-11  | 3.28E-11  |
| Unigene67466  | Potri.018G150600.2 | 6.948   | 18.7794  | -1.4345 | Down | 2.33E-11  | 7.17E-11  |
| Unigene118173 | Potri.009G012900.1 | 5.1479  | 13.914   | -1.4345 | Down | 2.33E-11  | 7.17E-11  |
| Unigene104883 | Potri.007G119300.3 | 2.0742  | 5.6063   | -1.4345 | Down | 2.33E-11  | 7.17E-11  |
| Unigene34596  | Potri.001G247800.1 | 2.9652  | 8.0146   | -1.4345 | Down | 2.33E-11  | 7.17E-11  |
| Unigene7414   | Potri.003G109000.1 | 11.4768 | 31.0221  | -1.4346 | Down | 6.52E-21  | 2.99E-20  |
| Unigene4785   | Potri.015G094000.1 | 11.0592 | 29.8952  | -1.4347 | Down | 1.44E-20  | 6.51E-20  |
| Unigene105539 | Potri.015G072900.1 | 3.3114  | 8.9525   | -1.4348 | Down | 1.15E-10  | 3.41E-10  |
| Unigene18960  | Potri.010G238000.1 | 3.3375  | 9.0225   | -1.4348 | Down | 3.16E-20  | 1.42E-19  |
| Unigene115739 | Potri.009G059600.2 | 13.5635 | 36.6673  | -1.4348 | Down | 3.16E-20  | 1.42E-19  |
| Unigene6979   | Potri.005G174200.1 | 13.3389 | 36.0602  | -1.4348 | Down | 3.16E-20  | 1.42E-19  |
| Unigene51326  | Potri.010G067500.1 | 7.8137  | 21.125   | -1.4349 | Down | 1.15E-10  | 3.41E-10  |
| Unigene30912  | Potri.006G040100.2 | 5.5066  | 14.8876  | -1.4349 | Down | 1.15E-10  | 3.41E-10  |
| Unigene38869  | Potri.005G226900.3 | 12.6117 | 34.0965  | -1.4349 | Down | 3.56E-38  | 2.67E-37  |
| Unigene55655  | Potri.005G109400.1 | 3.6609  | 9.8975   | -1.4349 | Down | 1.15E-10  | 3.41E-10  |
| Unigene45032  | Potri.001G215400.1 | 7.92    | 21.4131  | -1.4349 | Down | 7.81E-38  | 5.82E-37  |
| Unigene28621  | Potri.013G077700.1 | 6.3076  | 17.0542  | -1.435  | Down | 1.54E-19  | 6.72E-19  |
| Unigene3951   | Potri.001G377500.1 | 5.518   | 14.9194  | -1.435  | Down | 1.54E-19  | 6.72E-19  |
| Unigene46917  | Potri.001G056800.1 | 35.9181 | 97.1142  | -1.435  | Down | 1.71E-37  | 1.27E-36  |
| Unigene46732  | Potri.015G035600.1 | 5.9633  | 16.1245  | -1.4351 | Down | 2.56E-10  | 7.43E-10  |
| Unigene18801  | Potri.012G005000.1 | 11.4595 | 30.9862  | -1.4351 | Down | 5.13E-28  | 2.94E-27  |
| Unigene38266  | Potri.018G047700.5 | 10.8429 | 29.3212  | -1.4352 | Down | 7.46E-19  | 3.18E-18  |
| Unigene45839  | Potri.009G046300.2 | 21.0138 | 56.8253  | -1.4352 | Down | 3.97E-36  | 2.83E-35  |
| Unigene8445   | Potri.001G163100.1 | 19.6355 | 53.0988  | -1.4352 | Down | 1.44E-44  | 1.25E-43  |
| Unigene17593  | Potri.001G072800.1 | 13.2523 | 35.8357  | -1.4352 | Down | 1.13E-27  | 6.40E-27  |
| Unigene97063  | Potri.009G099400.1 | 3.5013  | 9.4689   | -1.4353 | Down | 5.69E-10  | 1.62E-09  |
| Unigene11841  | Potri.007G098900.2 | 6.1013  | 16.4999  | -1.4353 | Down | 3.15E-44  | 2.72E-43  |
| Unigene82900  | Potri.005G040800.1 | 39.9739 | 108.1209 | -1.4355 | Down | 1.29E-50  | 1.27E-49  |
| Unigene44806  | Potri.016G137900.1 | 35.2217 | 95.2701  | -1.4356 | Down | 1.99E-179 | 9.02E-178 |
| Unigene39874  | Potri.013G112700.1 | 4.4047  | 11.9142  | -1.4356 | Down | 1.27E-09  | 3.53E-09  |
| Unigene9551   | Potri.010G099400.1 | 5.0814  | 13.7445  | -1.4356 | Down | 1.27E-09  | 3.53E-09  |
| Unigene65568  | Potri.010G062000.1 | 4.169   | 11.2767  | -1.4356 | Down | 4.43E-34  | 3.00E-33  |
| Unigene29728  | Potri.004G142000.1 | 25.044  | 67.7408  | -1.4356 | Down | 4.43E-34  | 3.00E-33  |
| Unigene46498  | Potri.014G035800.3 | 10.5912 | 28.6506  | -1.4357 | Down | 1.76E-17  | 7.14E-17  |
| Unigene52429  | Potri.018G089700.4 | 3.3138  | 8.9669   | -1.4361 | Down | 6.30E-09  | 1.68E-08  |
| Unigene38005  | Potri.008G104100.1 | 3.0963  | 8.3784   | -1.4361 | Down | 6.30E-09  | 1.68E-08  |
| Unigene22605  | Potri.008G080300.3 | 2.1587  | 5.8412   | -1.4361 | Down | 6.30E-09  | 1.68E-08  |
| Unigene12973  | Potri.007G048000.2 | 18.2634 | 49.418   | -1.4361 | Down | 1.58E-46  | 1.43E-45  |
| Unigene42762  | Potri.001G352300.3 | 6.8827  | 18.6232  | -1.4361 | Down | 4.10E-39  | 3.15E-38  |

|               |                    |         |          |         |      |           |           |
|---------------|--------------------|---------|----------|---------|------|-----------|-----------|
| Unigene7937   | Potri.005G226500.1 | 3.7854  | 10.2452  | -1.4364 | Down | 6.96E-23  | 3.40E-22  |
| Unigene11956  | Potri.018G149400.1 | 23.2414 | 62.9039  | -1.4365 | Down | 2.11E-72  | 3.08E-71  |
| Unigene13620  | Potri.018G037200.1 | 5.9709  | 16.1614  | -1.4365 | Down | 1.22E-29  | 7.32E-29  |
| Unigene94821  | Potri.006G105400.1 | 2.7654  | 7.4848   | -1.4365 | Down | 1.41E-08  | 3.69E-08  |
| Unigene29646  | Potri.005G212700.1 | 3.1456  | 8.5137   | -1.4365 | Down | 3.83E-44  | 3.29E-43  |
| Unigene53133  | Potri.004G196800.3 | 13.3562 | 36.1491  | -1.4365 | Down | 9.25E-16  | 3.48E-15  |
| Unigene41384  | Potri.004G007500.1 | 17.4178 | 47.1421  | -1.4365 | Down | 4.56E-37  | 3.34E-36  |
| Unigene35839  | Potri.001G216600.1 | 17.3782 | 47.035   | -1.4365 | Down | 6.96E-23  | 3.40E-22  |
| Unigene8762   | Potri.015G030400.1 | 14.2374 | 38.5372  | -1.4366 | Down | 1.53E-22  | 7.41E-22  |
| Unigene40444  | Potri.002G234700.1 | 17.5613 | 47.5343  | -1.4366 | Down | 1.53E-22  | 7.41E-22  |
| Unigene41107  | Potri.004G206000.1 | 10.4439 | 28.2715  | -1.4367 | Down | 3.37E-22  | 1.61E-21  |
| Unigene50181  | Potri.008G114800.1 | 17.1957 | 46.5535  | -1.4368 | Down | 1.59E-95  | 3.20E-94  |
| Unigene82323  | Potri.001G356800.1 | 27.9747 | 75.7337  | -1.4368 | Down | 2.32E-35  | 1.62E-34  |
| Unigene23596  | Potri.008G049700.6 | 11.6561 | 31.5585  | -1.4369 | Down | 1.63E-21  | 7.64E-21  |
| Unigene13808  | Potri.014G166300.2 | 16.6263 | 45.0179  | -1.437  | Down | 1.41E-60  | 1.69E-59  |
| Unigene34941  | Potri.011G123700.3 | 6.6078  | 17.8913  | -1.437  | Down | 6.23E-28  | 3.56E-27  |
| Unigene33158  | Potri.010G066000.1 | 12.4115 | 33.6044  | -1.437  | Down | 1.12E-34  | 7.67E-34  |
| Unigene10899  | Potri.010G019200.1 | 3.661   | 9.9121   | -1.437  | Down | 1.12E-34  | 7.67E-34  |
| Unigene26051  | Potri.014G177800.2 | 17.1335 | 46.3927  | -1.4371 | Down | 3.60E-21  | 1.66E-20  |
| Unigene27278  | Potri.014G114300.1 | 24.8664 | 67.3374  | -1.4372 | Down | 3.01E-27  | 1.69E-26  |
| Unigene50370  | Potri.008G119100.1 | 22.6927 | 61.4487  | -1.4372 | Down | 8.72E-47  | 7.97E-46  |
| Unigene100603 | Potri.005G215200.1 | 2.5941  | 7.0249   | -1.4372 | Down | 7.03E-08  | 1.76E-07  |
| Unigene52113  | Potri.003G203900.1 | 13.6192 | 36.8805  | -1.4372 | Down | 7.92E-21  | 3.62E-20  |
| Unigene50785  | Potri.003G014800.3 | 2.5893  | 7.0117   | -1.4372 | Down | 7.03E-08  | 1.76E-07  |
| Unigene41562  | Potri.001G300900.1 | 3.8124  | 10.3238  | -1.4372 | Down | 7.03E-08  | 1.76E-07  |
| Unigene22815  | Potri.001G003900.1 | 6.2874  | 17.0261  | -1.4372 | Down | 2.21E-14  | 7.82E-14  |
| Unigene609    | Potri.016G096700.1 | 3.6694  | 9.9375   | -1.4373 | Down | 1.74E-20  | 7.89E-20  |
| Unigene40109  | Potri.009G123100.1 | 9.5466  | 25.8534  | -1.4373 | Down | 2.59E-33  | 1.72E-32  |
| Unigene19659  | Potri.017G036600.1 | 31.7737 | 86.0532  | -1.4374 | Down | 2.01E-45  | 1.78E-44  |
| Unigene14858  | Potri.008G047700.1 | 38.1751 | 103.3873 | -1.4374 | Down | 1.47E-114 | 3.73E-113 |
| Unigene110703 | Potri.002G254900.2 | 23.8717 | 64.6535  | -1.4374 | Down | 1.45E-26  | 7.98E-26  |
| Unigene42651  | Potri.005G012900.1 | 7.4267  | 20.117   | -1.4376 | Down | 1.09E-86  | 1.96E-85  |
| Unigene68322  | Potri.001G152200.2 | 4.6792  | 12.6749  | -1.4376 | Down | 1.58E-07  | 3.85E-07  |
| Unigene108247 | Potri.013G020400.2 | 12.6746 | 34.333   | -1.4377 | Down | 1.08E-13  | 3.72E-13  |
| Unigene47220  | Potri.012G114400.1 | 6.2463  | 16.9201  | -1.4377 | Down | 1.58E-07  | 3.85E-07  |
| Unigene40923  | Potri.008G202600.1 | 12.4332 | 33.679   | -1.4377 | Down | 1.08E-13  | 3.72E-13  |
| Unigene34003  | Potri.013G013400.1 | 5.4962  | 14.8898  | -1.4378 | Down | 1.87E-19  | 8.14E-19  |
| Unigene53256  | Potri.003G220100.1 | 13.6721 | 37.039   | -1.4378 | Down | 1.87E-19  | 8.14E-19  |
| Unigene50168  | Potri.004G141300.1 | 6.4905  | 17.5847  | -1.4379 | Down | 1.07E-42  | 8.95E-42  |

|               |                    |          |          |         |      |           |           |
|---------------|--------------------|----------|----------|---------|------|-----------|-----------|
| Unigene21927  | Potri.006G272200.1 | 22.9561  | 62.1964  | -1.438  | Down | 3.69E-124 | 1.03E-122 |
| Unigene92097  | Potri.002G082100.2 | 22.1338  | 59.9687  | -1.438  | Down | 2.10E-48  | 1.98E-47  |
| Unigene51382  | Potri.001G095000.1 | 17.7465  | 48.0849  | -1.438  | Down | 1.40E-30  | 8.61E-30  |
| Unigene34977  | Potri.013G059600.1 | 2.9099   | 7.885    | -1.4381 | Down | 3.54E-07  | 8.42E-07  |
| Unigene79926  | Potri.011G167300.1 | 40.4967  | 109.7302 | -1.4381 | Down | 1.01E-47  | 9.38E-47  |
| Unigene16743  | Potri.006G143000.2 | 11.0891  | 30.0484  | -1.4381 | Down | 5.29E-13  | 1.77E-12  |
| Unigene85011  | Potri.019G079500.1 | 34.1475  | 92.5392  | -1.4383 | Down | 1.06E-46  | 9.64E-46  |
| Unigene54052  | Potri.010G115700.2 | 7.324    | 19.8486  | -1.4383 | Down | 2.00E-18  | 8.39E-18  |
| Unigene10954  | Potri.003G106300.1 | 10.6678  | 28.9094  | -1.4383 | Down | 7.16E-75  | 1.09E-73  |
| Unigene30118  | Potri.008G029200.1 | 8.9074   | 24.1411  | -1.4384 | Down | 1.17E-12  | 3.84E-12  |
| Unigene44960  | Potri.001G289200.3 | 2.5655   | 6.9531   | -1.4384 | Down | 7.94E-24  | 4.01E-23  |
| Unigene12444  | Potri.015G110800.1 | 17.0098  | 46.102   | -1.4385 | Down | 2.61E-40  | 2.06E-39  |
| Unigene4094   | Potri.014G058500.2 | 15.9257  | 43.1652  | -1.4385 | Down | 1.35E-34  | 9.28E-34  |
| Unigene74508  | Potri.009G058600.1 | 32.8098  | 88.9284  | -1.4385 | Down | 1.35E-34  | 9.28E-34  |
| Unigene53616  | Potri.006G153900.3 | 36.968   | 100.1951 | -1.4385 | Down | 2.61E-40  | 2.06E-39  |
| Unigene119546 | Potri.016G062600.1 | 3.993    | 10.823   | -1.4386 | Down | 1.75E-23  | 8.71E-23  |
| Unigene29448  | Potri.016G104700.1 | 6.4238   | 17.4136  | -1.4387 | Down | 9.72E-18  | 3.97E-17  |
| Unigene14011  | Potri.016G030900.1 | 37.0012  | 100.3023 | -1.4387 | Down | 1.17E-44  | 1.02E-43  |
| Unigene33784  | Potri.002G228900.9 | 41.6339  | 112.8606 | -1.4387 | Down | 1.17E-119 | 3.13E-118 |
| Unigene41504  | Potri.015G089100.1 | 34.4951  | 93.5137  | -1.4388 | Down | 2.57E-44  | 2.22E-43  |
| Unigene44142  | Potri.006G241800.1 | 17.5479  | 47.5715  | -1.4388 | Down | 6.03E-39  | 4.62E-38  |
| Unigene48265  | Potri.008G046800.7 | 10.1625  | 27.5521  | -1.4389 | Down | 2.14E-17  | 8.64E-17  |
| Unigene91364  | Potri.001G344400.2 | 127.4625 | 345.5735 | -1.4389 | Down | 6.14E-248 | 4.19E-246 |
| Unigene101817 | Potri.012G069700.2 | 1.3474   | 3.6532   | -1.439  | Down | 5.77E-12  | 1.83E-11  |
| Unigene34429  | Potri.001G368600.1 | 6.3142   | 17.1193  | -1.439  | Down | 7.57E-28  | 4.32E-27  |
| Unigene34849  | Potri.014G032000.1 | 5.451    | 14.7808  | -1.4391 | Down | 1.51E-32  | 9.86E-32  |
| Unigene32508  | Potri.010G081400.2 | 12.6451  | 34.2868  | -1.4391 | Down | 9.92E-64  | 1.26E-62  |
| Unigene34496  | Potri.004G153500.2 | 13.0461  | 35.3743  | -1.4391 | Down | 1.66E-27  | 9.38E-27  |
| Unigene11220  | Potri.011G021000.1 | 7.958    | 21.5799  | -1.4392 | Down | 1.15E-52  | 1.19E-51  |
| Unigene29201  | Potri.006G261300.1 | 17.4021  | 47.1893  | -1.4392 | Down | 1.22E-47  | 1.14E-46  |
| Unigene41015  | Potri.008G094100.1 | 3.0994   | 8.4055   | -1.4393 | Down | 1.79E-06  | 4.04E-06  |
| Unigene13965  | Potri.001G463800.1 | 5.3024   | 14.38    | -1.4393 | Down | 8.03E-27  | 4.44E-26  |
| Unigene111054 | Potri.013G005100.2 | 4.7235   | 12.8101  | -1.4394 | Down | 1.79E-06  | 4.04E-06  |
| Unigene32327  | Potri.008G144300.1 | 3.2129   | 8.7134   | -1.4394 | Down | 7.29E-32  | 4.67E-31  |
| Unigene85668  | Potri.005G184500.1 | 18.522   | 50.2315  | -1.4394 | Down | 8.03E-27  | 4.44E-26  |
| Unigene36600  | Potri.005G174600.2 | 16.2787  | 44.1503  | -1.4394 | Down | 1.37E-41  | 1.12E-40  |
| Unigene30361  | Potri.004G222300.1 | 5.2255   | 14.1716  | -1.4394 | Down | 1.79E-06  | 4.04E-06  |
| Unigene78004  | Potri.002G122300.1 | 100.1031 | 271.5077 | -1.4395 | Down | 1.73E-110 | 4.21E-109 |
| Unigene32463  | Potri.018G143100.3 | 4.2283   | 11.4699  | -1.4397 | Down | 2.84E-11  | 8.70E-11  |

|               |                    |         |          |         |      |          |          |
|---------------|--------------------|---------|----------|---------|------|----------|----------|
| Unigene86273  | Potri.012G074800.1 | 69.6092 | 188.8301 | -1.4397 | Down | 2.01E-98 | 4.24E-97 |
| Unigene47499  | Potri.009G009200.1 | 2.4826  | 6.7351   | -1.4398 | Down | 5.09E-16 | 1.94E-15 |
| Unigene107228 | Potri.007G099800.1 | 3.3005  | 8.9538   | -1.4398 | Down | 5.09E-16 | 1.94E-15 |
| Unigene26415  | Potri.002G084100.4 | 23.4599 | 63.6417  | -1.4398 | Down | 8.53E-26 | 4.57E-25 |
| Unigene46203  | Potri.001G438400.1 | 15.1018 | 40.9693  | -1.4398 | Down | 5.09E-16 | 1.94E-15 |
| Unigene11078  | Potri.010G097700.1 | 2.278   | 6.1801   | -1.4399 | Down | 5.09E-16 | 1.94E-15 |
| Unigene47088  | Potri.009G042100.3 | 25.1707 | 68.2867  | -1.4399 | Down | 3.41E-35 | 2.38E-34 |
| Unigene70589  | Potri.009G125000.2 | 30.5856 | 82.9824  | -1.44   | Down | 3.72E-30 | 2.27E-29 |
| Unigene82150  | Potri.006G228100.3 | 27.5066 | 74.6297  | -1.44   | Down | 7.49E-35 | 5.16E-34 |
| Unigene32284  | Potri.006G104700.1 | 10.1321 | 27.4899  | -1.44   | Down | 2.20E-96 | 4.49E-95 |
| Unigene25091  | Potri.001G356800.1 | 21.5861 | 58.5678  | -1.44   | Down | 6.42E-49 | 6.13E-48 |
| Unigene5286   | Potri.014G089200.1 | 22.8884 | 62.1044  | -1.4401 | Down | 4.12E-25 | 2.16E-24 |
| Unigene57228  | Potri.012G075500.1 | 8.6371  | 23.4356  | -1.4401 | Down | 4.12E-25 | 2.16E-24 |
| Unigene63729  | Potri.008G060600.2 | 2.5496  | 6.918    | -1.4401 | Down | 4.04E-06 | 8.82E-06 |
| Unigene111843 | Potri.001G230000.1 | 38.2438 | 103.7694 | -1.4401 | Down | 6.83E-44 | 5.85E-43 |
| Unigene39144  | Potri.001G200500.1 | 5.3005  | 14.3821  | -1.4401 | Down | 6.31E-11 | 1.90E-10 |
| Unigene52249  | Potri.001G174100.2 | 2.4563  | 6.6649   | -1.4401 | Down | 4.04E-06 | 8.82E-06 |
| Unigene55126  | Potri.001G099600.1 | 3.0987  | 8.408    | -1.4401 | Down | 4.04E-06 | 8.82E-06 |
| Unigene7878   | Potri.002G165900.1 | 7.0267  | 19.0681  | -1.4402 | Down | 9.06E-25 | 4.71E-24 |
| Unigene109960 | Potri.T099700.1    | 22.3116 | 60.553   | -1.4404 | Down | 1.99E-24 | 1.03E-23 |
| Unigene12611  | Potri.009G014500.4 | 8.2122  | 22.2876  | -1.4404 | Down | 1.99E-24 | 1.03E-23 |
| Unigene71247  | Potri.008G084800.5 | 14.5874 | 39.5884  | -1.4404 | Down | 2.48E-15 | 9.18E-15 |
| Unigene11885  | Potri.001G361100.1 | 8.8488  | 24.0146  | -1.4404 | Down | 2.48E-15 | 9.18E-15 |
| Unigene34559  | Potri.001G178700.1 | 3.1414  | 8.5254   | -1.4404 | Down | 2.48E-15 | 9.18E-15 |
| Unigene893    | Potri.006G212600.3 | 16.0494 | 43.5591  | -1.4405 | Down | 1.47E-51 | 1.48E-50 |
| Unigene83617  | Potri.003G217900.5 | 42.9427 | 116.5519 | -1.4405 | Down | 6.67E-56 | 7.35E-55 |
| Unigene78096  | Potri.003G069600.5 | 8.2535  | 22.4011  | -1.4405 | Down | 1.40E-10 | 4.13E-10 |
| Unigene81441  | Potri.003G150500.1 | 11.3073 | 30.6926  | -1.4406 | Down | 5.49E-15 | 2.00E-14 |
| Unigene90579  | Potri.002G252800.1 | 39.5163 | 107.2644 | -1.4407 | Down | 6.40E-73 | 9.41E-72 |
| Unigene37311  | Potri.001G362300.3 | 25.7936 | 70.0176  | -1.4407 | Down | 3.72E-37 | 2.72E-36 |
| Unigene30226  | Potri.T044200.3    | 3.0178  | 8.1931   | -1.4409 | Down | 9.13E-06 | 1.93E-05 |
| Unigene38063  | Potri.017G056900.3 | 11.9857 | 32.5407  | -1.4409 | Down | 2.12E-23 | 1.06E-22 |
| Unigene12276  | Potri.016G042000.1 | 2.7919  | 7.5798   | -1.4409 | Down | 3.12E-10 | 9.01E-10 |
| Unigene46606  | Potri.008G144400.2 | 4.3676  | 11.8579  | -1.4409 | Down | 3.12E-10 | 9.01E-10 |
| Unigene3980   | Potri.002G080600.1 | 13.5143 | 36.6908  | -1.4409 | Down | 1.21E-14 | 4.35E-14 |
| Unigene65354  | Potri.001G289800.2 | 5.0269  | 13.6478  | -1.4409 | Down | 3.12E-10 | 9.01E-10 |
| Unigene20915  | Potri.001G216600.2 | 7.5353  | 20.4579  | -1.4409 | Down | 5.00E-19 | 2.15E-18 |
| Unigene27497  | Potri.001G011900.1 | 30.7319 | 83.441   | -1.441  | Down | 7.87E-45 | 6.88E-44 |
| Unigene15606  | Potri.T033800.1    | 7.3697  | 20.0116  | -1.4412 | Down | 1.10E-18 | 4.67E-18 |

|               |                    |         |          |         |      |           |           |
|---------------|--------------------|---------|----------|---------|------|-----------|-----------|
| Unigene44776  | Potri.015G031100.1 | 11.4279 | 31.0367  | -1.4414 | Down | 9.75E-27  | 5.38E-26  |
| Unigene12948  | Potri.009G023200.1 | 14.5314 | 39.4637  | -1.4414 | Down | 1.85E-39  | 1.43E-38  |
| Unigene107430 | Potri.003G130400.1 | 8.9074  | 24.1911  | -1.4414 | Down | 6.94E-10  | 1.97E-09  |
| Unigene26796  | Potri.002G245400.1 | 13.8789 | 37.6931  | -1.4414 | Down | 2.43E-18  | 1.02E-17  |
| Unigene16208  | Potri.012G114200.1 | 46.3549 | 125.8982 | -1.4415 | Down | 1.71E-76  | 2.66E-75  |
| Unigene28893  | Potri.003G004000.1 | 4.7625  | 12.9352  | -1.4415 | Down | 2.26E-22  | 1.09E-21  |
| Unigene15067  | Potri.009G007900.2 | 7.4918  | 20.3502  | -1.4417 | Down | 5.36E-18  | 2.21E-17  |
| Unigene38666  | Potri.006G199800.6 | 28.0898 | 76.3023  | -1.4417 | Down | 8.50E-55  | 9.15E-54  |
| Unigene3747   | Potri.002G192800.4 | 13.9766 | 37.9681  | -1.4418 | Down | 4.52E-30  | 2.75E-29  |
| Unigene38380  | Potri.017G043500.1 | 2.3764  | 6.4563   | -1.4419 | Down | 2.07E-05  | 4.24E-05  |
| Unigene5478   | Potri.016G118400.1 | 1.1562  | 3.1412   | -1.4419 | Down | 2.07E-05  | 4.24E-05  |
| Unigene16961  | Potri.014G101900.1 | 1.4541  | 3.9504   | -1.4419 | Down | 2.07E-05  | 4.24E-05  |
| Unigene71317  | Potri.010G185800.3 | 12.6782 | 34.4445  | -1.4419 | Down | 1.31E-13  | 4.50E-13  |
| Unigene24910  | Potri.005G018800.1 | 3.131   | 8.5064   | -1.4419 | Down | 2.07E-05  | 4.24E-05  |
| Unigene27703  | Potri.001G132900.1 | 5.168   | 14.0406  | -1.4419 | Down | 1.54E-09  | 4.29E-09  |
| Unigene100012 | Potri.016G138400.2 | 1.3574  | 3.6879   | -1.442  | Down | 2.07E-05  | 4.24E-05  |
| Unigene50460  | Potri.016G042100.1 | 15.3935 | 41.8254  | -1.4421 | Down | 2.11E-33  | 1.40E-32  |
| Unigene356    | Potri.007G119300.1 | 8.7916  | 23.8883  | -1.4421 | Down | 2.28E-25  | 1.20E-24  |
| Unigene32711  | Potri.016G068800.2 | 8.4017  | 22.8303  | -1.4422 | Down | 2.44E-115 | 6.27E-114 |
| Unigene53809  | Potri.004G039500.1 | 11.3411 | 30.8177  | -1.4422 | Down | 2.61E-17  | 1.05E-16  |
| Unigene91757  | Potri.006G265600.1 | 19.1192 | 51.9557  | -1.4423 | Down | 9.69E-41  | 7.73E-40  |
| Unigene46002  | Potri.002G192800.3 | 10.2003 | 27.7196  | -1.4423 | Down | 2.91E-13  | 9.82E-13  |
| Unigene2868   | Potri.015G142900.3 | 5.9889  | 16.276   | -1.4424 | Down | 2.15E-67  | 2.90E-66  |
| Unigene60076  | Potri.013G159200.1 | 2.498   | 6.7893   | -1.4425 | Down | 3.44E-09  | 9.37E-09  |
| Unigene3426   | Potri.011G041900.3 | 28.9195 | 78.6001  | -1.4425 | Down | 2.23E-32  | 1.45E-31  |
| Unigene82715  | Potri.005G158300.5 | 24.9609 | 67.8412  | -1.4425 | Down | 2.23E-32  | 1.45E-31  |
| Unigene6290   | Potri.010G192900.2 | 47.7746 | 129.8585 | -1.4426 | Down | 3.01E-119 | 8.04E-118 |
| Unigene4758   | Potri.001G451300.1 | 26.9158 | 73.1577  | -1.4426 | Down | 4.76E-36  | 3.39E-35  |
| Unigene41054  | Potri.010G131000.1 | 9.6209  | 26.1523  | -1.4427 | Down | 6.44E-13  | 2.14E-12  |
| Unigene21527  | Potri.009G011700.2 | 9.4888  | 25.7925  | -1.4427 | Down | 1.03E-54  | 1.11E-53  |
| Unigene35401  | Potri.001G285900.1 | 9.1836  | 24.9635  | -1.4427 | Down | 6.44E-13  | 2.14E-12  |
| Unigene87649  | Potri.003G043500.1 | 40.2227 | 109.3441 | -1.4428 | Down | 1.08E-61  | 1.32E-60  |
| Unigene23917  | Potri.001G015900.1 | 10.6774 | 29.0269  | -1.4428 | Down | 4.94E-54  | 5.23E-53  |
| Unigene91592  | Potri.016G061100.1 | 22.31   | 60.6534  | -1.4429 | Down | 2.29E-46  | 2.07E-45  |
| Unigene46680  | Potri.009G052900.1 | 10.9344 | 29.726   | -1.4429 | Down | 2.58E-20  | 1.16E-19  |
| Unigene2865   | Potri.010G110400.9 | 47.6085 | 129.4408 | -1.443  | Down | 2.85E-90  | 5.36E-89  |
| Unigene29205  | Potri.017G119500.2 | 2.611   | 7.0994   | -1.4431 | Down | 7.68E-09  | 2.05E-08  |
| Unigene49194  | Potri.008G141400.4 | 2.9558  | 8.037    | -1.4431 | Down | 7.68E-09  | 2.05E-08  |
| Unigene53099  | Potri.008G049700.6 | 7.0886  | 19.2744  | -1.4431 | Down | 7.68E-09  | 2.05E-08  |

|               |                    |         |         |         |      |           |           |
|---------------|--------------------|---------|---------|---------|------|-----------|-----------|
| Unigene118788 | Potri.007G116100.3 | 1.5921  | 4.3289  | -1.4431 | Down | 4.71E-05  | 9.34E-05  |
| Unigene36673  | Potri.005G214400.6 | 5.7595  | 15.6604 | -1.4431 | Down | 7.68E-09  | 2.05E-08  |
| Unigene34041  | Potri.004G237100.1 | 50.9245 | 138.462 | -1.4431 | Down | 1.38E-93  | 2.71E-92  |
| Unigene103841 | Potri.003G085300.2 | 1.809   | 4.9187  | -1.4431 | Down | 7.68E-09  | 2.05E-08  |
| Unigene46928  | Potri.004G134400.1 | 1.2736  | 3.4631  | -1.4432 | Down | 4.71E-05  | 9.34E-05  |
| Unigene24536  | Potri.015G142900.3 | 4.4514  | 12.1052 | -1.4433 | Down | 5.38E-27  | 2.99E-26  |
| Unigene93207  | Potri.019G039200.1 | 35.0452 | 95.3111 | -1.4434 | Down | 3.31E-91  | 6.29E-90  |
| Unigene32408  | Potri.017G041800.6 | 10.0393 | 27.3033 | -1.4434 | Down | 2.51E-48  | 2.37E-47  |
| Unigene35121  | Potri.015G096100.1 | 7.007   | 19.0569 | -1.4434 | Down | 2.50E-30  | 1.53E-29  |
| Unigene38919  | Potri.002G159900.2 | 24.3927 | 66.3375 | -1.4434 | Down | 1.14E-37  | 8.44E-37  |
| Unigene12760  | Potri.001G376400.6 | 8.4809  | 23.0644 | -1.4434 | Down | 1.25E-19  | 5.49E-19  |
| Unigene18669  | Potri.001G274500.2 | 5.2991  | 14.4112 | -1.4434 | Down | 1.25E-19  | 5.49E-19  |
| Unigene9993   | Potri.003G133000.1 | 6.9794  | 18.9832 | -1.4435 | Down | 3.16E-12  | 1.02E-11  |
| Unigene108940 | Potri.014G179100.4 | 10.7833 | 29.3295 | -1.4436 | Down | 3.16E-12  | 1.02E-11  |
| Unigene110885 | Potri.014G051200.1 | 20.0465 | 54.5244 | -1.4436 | Down | 5.67E-23  | 2.78E-22  |
| Unigene840    | Potri.014G055800.1 | 24.2507 | 65.966  | -1.4437 | Down | 4.22E-107 | 9.81E-106 |
| Unigene45726  | Potri.006G093600.1 | 1.8886  | 5.1376  | -1.4438 | Down | 1.72E-08  | 4.48E-08  |
| Unigene15419  | Potri.008G215300.3 | 4.805   | 13.0734 | -1.444  | Down | 7.02E-12  | 2.21E-11  |
| Unigene44964  | Potri.007G052700.3 | 4.0085  | 10.9064 | -1.444  | Down | 7.02E-12  | 2.21E-11  |
| Unigene24869  | Potri.009G074100.1 | 24.7251 | 67.2798 | -1.4442 | Down | 2.70E-32  | 1.75E-31  |
| Unigene27537  | Potri.006G149400.1 | 10.4267 | 28.3728 | -1.4442 | Down | 1.34E-18  | 5.65E-18  |
| Unigene47402  | Potri.010G145000.1 | 17.4818 | 47.5728 | -1.4443 | Down | 2.82E-42  | 2.33E-41  |
| Unigene21339  | Potri.007G010000.1 | 8.3672  | 22.7716 | -1.4444 | Down | 2.92E-45  | 2.58E-44  |
| Unigene50280  | Potri.004G088100.1 | 12.4912 | 33.9957 | -1.4444 | Down | 6.62E-52  | 6.72E-51  |
| Unigene25231  | Potri.T077100.1    | 2.2147  | 6.0278  | -1.4445 | Down | 1.07E-04  | 2.05E-04  |
| Unigene75157  | Potri.T044200.3    | 6.4721  | 17.6154 | -1.4445 | Down | 3.84E-08  | 9.79E-08  |
| Unigene6033   | Potri.018G020600.1 | 20.776  | 56.5473 | -1.4445 | Down | 1.30E-31  | 8.28E-31  |
| Unigene582    | Potri.014G067700.1 | 5.8462  | 15.912  | -1.4445 | Down | 1.30E-31  | 8.28E-31  |
| Unigene102446 | Potri.006G230200.1 | 1.9907  | 5.4182  | -1.4445 | Down | 1.07E-04  | 2.05E-04  |
| Unigene61176  | Potri.005G180800.3 | 6.8638  | 18.6817 | -1.4445 | Down | 6.68E-15  | 2.42E-14  |
| Unigene71681  | Potri.005G094900.1 | 10.4219 | 28.366  | -1.4445 | Down | 1.56E-11  | 4.82E-11  |
| Unigene20134  | Potri.001G015000.1 | 5.4725  | 14.8949 | -1.4445 | Down | 6.68E-15  | 2.42E-14  |
| Unigene118127 | Potri.006G177000.1 | 1.7327  | 4.7161  | -1.4446 | Down | 1.07E-04  | 2.05E-04  |
| Unigene42632  | Potri.004G017200.3 | 1.9631  | 5.3432  | -1.4446 | Down | 6.68E-15  | 2.42E-14  |
| Unigene50050  | Potri.008G178000.2 | 3.9715  | 10.8124 | -1.4449 | Down | 1.48E-14  | 5.28E-14  |
| Unigene25655  | Potri.003G113900.1 | 26.2873 | 71.5679 | -1.4449 | Down | 1.35E-27  | 7.67E-27  |
| Unigene48892  | Potri.001G081300.1 | 10.6734 | 29.057  | -1.4449 | Down | 6.51E-18  | 2.68E-17  |
| Unigene32174  | Potri.001G008000.1 | 6.0644  | 16.5097 | -1.4449 | Down | 6.51E-18  | 2.68E-17  |
| Unigene56267  | Potri.014G054600.1 | 3.2358  | 8.8097  | -1.445  | Down | 1.48E-14  | 5.28E-14  |



|               |                    |         |          |         |      |          |          |
|---------------|--------------------|---------|----------|---------|------|----------|----------|
| Unigene53289  | Potri.019G032800.6 | 6.8383  | 18.6191  | -1.4451 | Down | 3.46E-11 | 1.05E-10 |
| Unigene27512  | Potri.013G085000.1 | 23.1957 | 63.1661  | -1.4453 | Down | 1.46E-36 | 1.05E-35 |
| Unigene12712  | Potri.010G253100.3 | 8.9123  | 24.2712  | -1.4454 | Down | 1.42E-20 | 6.44E-20 |
| Unigene39736  | Potri.005G224900.1 | 21.8596 | 59.5336  | -1.4454 | Down | 7.69E-49 | 7.33E-48 |
| Unigene37592  | Potri.001G190200.1 | 4.5986  | 12.5235  | -1.4454 | Down | 8.59E-08 | 2.14E-07 |
| Unigene66353  | Potri.013G159500.1 | 3.1681  | 8.6295   | -1.4457 | Down | 7.68E-11 | 2.30E-10 |
| Unigene2846   | Potri.008G160400.3 | 13.9217 | 37.9213  | -1.4457 | Down | 3.69E-48 | 3.47E-47 |
| Unigene57888  | Potri.008G021200.1 | 8.0549  | 21.9416  | -1.4457 | Down | 1.49E-32 | 9.74E-32 |
| Unigene1465   | Potri.014G144900.1 | 4.3808  | 11.9342  | -1.4458 | Down | 7.22E-14 | 2.51E-13 |
| Unigene55344  | Potri.012G102500.2 | 10.4023 | 28.3378  | -1.4458 | Down | 7.22E-14 | 2.51E-13 |
| Unigene73784  | Potri.003G139200.1 | 12.3159 | 33.5509  | -1.4458 | Down | 7.22E-14 | 2.51E-13 |
| Unigene110153 | Potri.002G062400.1 | 11.8143 | 32.1845  | -1.4458 | Down | 7.22E-14 | 2.51E-13 |
| Unigene2650   | Potri.018G035700.1 | 5.6859  | 15.4915  | -1.446  | Down | 3.60E-41 | 2.90E-40 |
| Unigene9154   | Potri.003G109000.1 | 25.8304 | 70.3778  | -1.4461 | Down | 3.88E-47 | 3.57E-46 |
| Unigene52322  | Potri.018G091600.2 | 1.8169  | 4.9512   | -1.4463 | Down | 2.46E-04 | 4.52E-04 |
| Unigene54782  | Potri.016G097600.1 | 2.2974  | 6.2607   | -1.4463 | Down | 2.46E-04 | 4.52E-04 |
| Unigene37066  | Potri.015G048300.1 | 3.2269  | 8.7937   | -1.4463 | Down | 1.92E-07 | 4.67E-07 |
| Unigene105790 | Potri.013G092300.1 | 2.2249  | 6.063    | -1.4463 | Down | 2.46E-04 | 4.52E-04 |
| Unigene29681  | Potri.013G057700.1 | 6.8674  | 18.7144  | -1.4463 | Down | 1.71E-10 | 5.01E-10 |
| Unigene15541  | Potri.013G015300.1 | 10.8207 | 29.4874  | -1.4463 | Down | 1.54E-16 | 6.01E-16 |
| Unigene62735  | Potri.010G008800.1 | 1.9631  | 5.3497   | -1.4463 | Down | 2.46E-04 | 4.52E-04 |
| Unigene76969  | Potri.009G139400.1 | 2.769   | 7.5457   | -1.4463 | Down | 2.46E-04 | 4.52E-04 |
| Unigene113442 | Potri.008G150100.6 | 2.4866  | 6.7763   | -1.4463 | Down | 2.46E-04 | 4.52E-04 |
| Unigene112541 | Potri.005G097600.1 | 2.5987  | 7.0818   | -1.4463 | Down | 2.46E-04 | 4.52E-04 |
| Unigene54943  | Potri.002G109000.3 | 3.8314  | 10.4409  | -1.4463 | Down | 1.92E-07 | 4.67E-07 |
| Unigene86820  | Potri.001G219200.2 | 2.0722  | 5.6469   | -1.4463 | Down | 2.46E-04 | 4.52E-04 |
| Unigene30207  | Potri.001G111400.1 | 4.887   | 13.3176  | -1.4463 | Down | 1.60E-13 | 5.46E-13 |
| Unigene102620 | Potri.001G067400.1 | 1.9631  | 5.3497   | -1.4463 | Down | 2.46E-04 | 4.52E-04 |
| Unigene11337  | Potri.013G161700.5 | 7.1065  | 19.3684  | -1.4465 | Down | 3.56E-34 | 2.42E-33 |
| Unigene22184  | Potri.007G036700.1 | 8.3813  | 22.8434  | -1.4465 | Down | 3.40E-28 | 1.96E-27 |
| Unigene50607  | Potri.006G254400.2 | 28.0914 | 76.5604  | -1.4465 | Down | 1.44E-75 | 2.20E-74 |
| Unigene12770  | Potri.002G079100.1 | 9.0261  | 24.5996  | -1.4465 | Down | 3.79E-40 | 2.98E-39 |
| Unigene11037  | Potri.014G166100.1 | 8.4216  | 22.9548  | -1.4466 | Down | 2.33E-57 | 2.64E-56 |
| Unigene18460  | Potri.008G218000.1 | 4.4868  | 12.2303  | -1.4467 | Down | 3.41E-16 | 1.31E-15 |
| Unigene19009  | Potri.014G128900.1 | 6.9937  | 19.0651  | -1.4468 | Down | 3.54E-13 | 1.19E-12 |
| Unigene35431  | Potri.006G186700.9 | 11.7227 | 31.9568  | -1.4468 | Down | 3.54E-13 | 1.19E-12 |
| Unigene108525 | Potri.005G151500.1 | 11.8354 | 32.2641  | -1.4468 | Down | 3.54E-13 | 1.19E-12 |
| Unigene4308   | Potri.003G043200.1 | 42.4891 | 115.8382 | -1.4469 | Down | 9.80E-48 | 9.14E-47 |
| Unigene31048  | Potri.010G094100.1 | 3.784   | 10.3167  | -1.447  | Down | 3.80E-10 | 1.09E-09 |

|               |                    |         |          |         |      |          |          |
|---------------|--------------------|---------|----------|---------|------|----------|----------|
| Unigene19609  | Potri.006G147400.1 | 7.912   | 21.5713  | -1.447  | Down | 3.80E-10 | 1.09E-09 |
| Unigene55150  | Potri.014G018000.2 | 7.1759  | 19.5691  | -1.4473 | Down | 1.63E-18 | 6.84E-18 |
| Unigene4779   | Potri.018G051800.2 | 3.1164  | 8.4987   | -1.4474 | Down | 4.32E-07 | 1.02E-06 |
| Unigene29018  | Potri.018G027500.2 | 13.0269 | 35.5253  | -1.4474 | Down | 1.03E-46 | 9.40E-46 |
| Unigene83247  | Potri.011G126800.1 | 13.361  | 36.4366  | -1.4474 | Down | 1.63E-18 | 6.84E-18 |
| Unigene74276  | Potri.010G251500.1 | 47.0148 | 128.2188 | -1.4474 | Down | 2.35E-49 | 2.27E-48 |
| Unigene20789  | Potri.004G141700.4 | 4.3246  | 11.7935  | -1.4474 | Down | 4.32E-07 | 1.02E-06 |
| Unigene34341  | Potri.006G180100.1 | 10.3248 | 28.1597  | -1.4475 | Down | 3.55E-21 | 1.65E-20 |
| Unigene43331  | Potri.015G106000.3 | 5.7051  | 15.5606  | -1.4476 | Down | 1.77E-29 | 1.06E-28 |
| Unigene13236  | Potri.010G185600.1 | 10.8539 | 29.6053  | -1.4476 | Down | 7.84E-24 | 3.96E-23 |
| Unigene20619  | Potri.009G115500.2 | 9.7572  | 26.6127  | -1.4476 | Down | 1.66E-15 | 6.18E-15 |
| Unigene3456   | Potri.018G006200.1 | 10.3122 | 28.1296  | -1.4477 | Down | 3.58E-18 | 1.49E-17 |
| Unigene52320  | Potri.007G100800.1 | 4.6874  | 12.7862  | -1.4477 | Down | 8.45E-10 | 2.38E-09 |
| Unigene15766  | Potri.006G046800.1 | 33.077  | 90.2272  | -1.4477 | Down | 4.76E-43 | 4.01E-42 |
| Unigene7505   | Potri.017G144900.3 | 2.6805  | 7.312    | -1.4478 | Down | 8.45E-10 | 2.38E-09 |
| Unigene51356  | Potri.014G157100.2 | 19.0155 | 51.8731  | -1.4478 | Down | 3.89E-29 | 2.31E-28 |
| Unigene12566  | Potri.011G045500.1 | 18.6498 | 50.8751  | -1.4478 | Down | 7.49E-65 | 9.69E-64 |
| Unigene72753  | Potri.004G049400.1 | 11.1181 | 30.3321  | -1.4479 | Down | 1.74E-12 | 5.65E-12 |
| Unigene32150  | Potri.015G141400.1 | 7.8423  | 21.3957  | -1.448  | Down | 4.45E-37 | 3.25E-36 |
| Unigene88160  | Potri.008G160400.2 | 29.6804 | 80.983   | -1.4481 | Down | 1.19E-47 | 1.11E-46 |
| Unigene32616  | Potri.004G062600.1 | 17.5304 | 47.8298  | -1.4481 | Down | 5.68E-83 | 9.68E-82 |
| Unigene75202  | Potri.019G083300.1 | 20.7787 | 56.6997  | -1.4482 | Down | 3.80E-23 | 1.87E-22 |
| Unigene20607  | Potri.008G046400.1 | 4.0849  | 11.1465  | -1.4482 | Down | 3.80E-23 | 1.87E-22 |
| Unigene28718  | Potri.001G305700.2 | 5.3356  | 14.5591  | -1.4482 | Down | 1.72E-20 | 7.80E-20 |
| Unigene85783  | Potri.014G144100.1 | 17.4404 | 47.5914  | -1.4483 | Down | 8.42E-26 | 4.51E-25 |
| Unigene20511  | Potri.014G020200.1 | 25.0204 | 68.2793  | -1.4483 | Down | 1.99E-68 | 2.73E-67 |
| Unigene13993  | Potri.013G029000.5 | 16.9713 | 46.3134  | -1.4483 | Down | 9.48E-34 | 6.36E-33 |
| Unigene22058  | Potri.001G154600.1 | 11.4085 | 31.1325  | -1.4483 | Down | 4.21E-31 | 2.64E-30 |
| Unigene88305  | Potri.014G138000.2 | 30.7439 | 83.9018  | -1.4484 | Down | 1.30E-49 | 1.26E-48 |
| Unigene6840   | Potri.016G061700.1 | 5.1018  | 13.9244  | -1.4485 | Down | 1.88E-09 | 5.20E-09 |
| Unigene89540  | Potri.015G146500.1 | 3.1257  | 8.5309   | -1.4485 | Down | 9.71E-07 | 2.24E-06 |
| Unigene82493  | Potri.015G131100.2 | 61.9286 | 169.0233 | -1.4485 | Down | 2.69E-78 | 4.31E-77 |
| Unigene24079  | Potri.010G159200.3 | 8.4346  | 23.0207  | -1.4485 | Down | 1.74E-17 | 7.06E-17 |
| Unigene104840 | Potri.004G078900.1 | 2.3508  | 6.4161   | -1.4485 | Down | 1.88E-09 | 5.20E-09 |
| Unigene81238  | Potri.002G094200.1 | 39.8058 | 108.643  | -1.4485 | Down | 2.85E-49 | 2.74E-48 |
| Unigene107865 | Potri.001G371600.1 | 16.5367 | 45.1341  | -1.4485 | Down | 1.74E-17 | 7.06E-17 |
| Unigene9392   | Potri.001G266400.1 | 16.737  | 45.6806  | -1.4485 | Down | 3.80E-20 | 1.70E-19 |
| Unigene30781  | Potri.001G243500.1 | 3.4537  | 9.4262   | -1.4485 | Down | 9.71E-07 | 2.24E-06 |
| Unigene7112   | Potri.001G193300.1 | 3.5865  | 9.7887   | -1.4485 | Down | 8.35E-23 | 4.07E-22 |

|               |                    |         |          |         |      |          |          |
|---------------|--------------------|---------|----------|---------|------|----------|----------|
| Unigene32945  | Potri.009G156400.3 | 15.566  | 42.4905  | -1.4487 | Down | 4.57E-67 | 6.14E-66 |
| Unigene19784  | Potri.006G117400.1 | 29.4431 | 80.3704  | -1.4487 | Down | 2.42E-72 | 3.53E-71 |
| Unigene117249 | Potri.010G098300.1 | 28.1866 | 76.9455  | -1.4488 | Down | 1.37E-48 | 1.30E-47 |
| Unigene8631   | Potri.001G197600.3 | 11.0686 | 30.2206  | -1.4491 | Down | 1.79E-14 | 6.39E-14 |
| Unigene46787  | Potri.010G146000.3 | 2.8807  | 7.8658   | -1.4492 | Down | 8.54E-12 | 2.68E-11 |
| Unigene36684  | Potri.007G008000.1 | 41.4972 | 113.3197 | -1.4493 | Down | 9.98E-63 | 1.24E-61 |
| Unigene71897  | Potri.016G070200.1 | 7.8238  | 21.3668  | -1.4494 | Down | 4.20E-09 | 1.14E-08 |
| Unigene28052  | Potri.008G119700.2 | 14.5405 | 39.7084  | -1.4494 | Down | 2.77E-42 | 2.30E-41 |
| Unigene45809  | Potri.008G045400.4 | 7.2904  | 19.9099  | -1.4494 | Down | 4.20E-09 | 1.14E-08 |
| Unigene43173  | Potri.008G035700.1 | 8.0462  | 21.9742  | -1.4494 | Down | 1.97E-24 | 1.01E-23 |
| Unigene47216  | Potri.001G066800.1 | 23.4143 | 63.9443  | -1.4494 | Down | 4.83E-32 | 3.10E-31 |
| Unigene79193  | Potri.001G038100.2 | 6.6551  | 18.1751  | -1.4494 | Down | 4.20E-09 | 1.14E-08 |
| Unigene21534  | Potri.011G089500.2 | 5.2271  | 14.2757  | -1.4495 | Down | 1.38E-44 | 1.20E-43 |
| Unigene17464  | Potri.009G150300.3 | 9.0279  | 24.6572  | -1.4495 | Down | 8.90E-22 | 4.20E-21 |
| Unigene29989  | Potri.006G082100.1 | 23.8885 | 65.2445  | -1.4495 | Down | 6.08E-42 | 4.99E-41 |
| Unigene16797  | Potri.017G071400.1 | 18.3129 | 50.0171  | -1.4496 | Down | 1.81E-54 | 1.93E-53 |
| Unigene21497  | Potri.015G092400.2 | 9.8157  | 26.81    | -1.4496 | Down | 2.41E-64 | 3.09E-63 |
| Unigene1391   | Potri.010G030800.2 | 16.0482 | 43.8323  | -1.4496 | Down | 6.91E-47 | 6.32E-46 |
| Unigene42605  | Potri.009G146400.1 | 7.0421  | 19.2341  | -1.4496 | Down | 2.08E-59 | 2.45E-58 |
| Unigene19718  | Potri.008G134600.1 | 5.8332  | 15.9325  | -1.4496 | Down | 3.97E-14 | 1.39E-13 |
| Unigene13944  | Potri.010G147900.1 | 29.6548 | 81.004   | -1.4497 | Down | 5.27E-64 | 6.72E-63 |
| Unigene74305  | Potri.001G140200.5 | 60.8937 | 166.3481 | -1.4498 | Down | 1.15E-63 | 1.46E-62 |
| Unigene49274  | Potri.012G108700.1 | 3.036   | 8.294    | -1.4499 | Down | 2.19E-06 | 4.89E-06 |
| Unigene20892  | Potri.004G143300.2 | 3.0717  | 8.3916   | -1.4499 | Down | 2.19E-06 | 4.89E-06 |
| Unigene101882 | Potri.003G086200.1 | 2.6045  | 7.1151   | -1.4499 | Down | 2.19E-06 | 4.89E-06 |
| Unigene25307  | Potri.002G194500.9 | 2.3954  | 6.5439   | -1.4499 | Down | 2.19E-06 | 4.89E-06 |
| Unigene18739  | Potri.002G018100.1 | 12.2509 | 33.468   | -1.4499 | Down | 1.96E-21 | 9.14E-21 |
| Unigene60928  | Potri.001G166600.1 | 4.2979  | 11.7414  | -1.4499 | Down | 2.19E-06 | 4.89E-06 |
| Unigene40918  | Potri.014G084500.1 | 21.3646 | 58.3703  | -1.45   | Down | 1.15E-33 | 7.70E-33 |
| Unigene85131  | Potri.001G196700.1 | 23.6885 | 64.7193  | -1.45   | Down | 1.15E-33 | 7.69E-33 |
| Unigene50182  | Potri.011G028400.6 | 3.707   | 10.1286  | -1.4501 | Down | 8.95E-19 | 3.81E-18 |
| Unigene44585  | Potri.002G234700.1 | 12.3483 | 33.7391  | -1.4501 | Down | 8.95E-19 | 3.81E-18 |
| Unigene41311  | Potri.012G011700.2 | 32.5851 | 89.0349  | -1.4502 | Down | 3.19E-43 | 2.70E-42 |
| Unigene63298  | Potri.008G040500.2 | 8.1188  | 22.1843  | -1.4502 | Down | 8.78E-14 | 3.03E-13 |
| Unigene2714   | Potri.006G125400.4 | 4.8241  | 13.1817  | -1.4502 | Down | 4.65E-26 | 2.51E-25 |
| Unigene6912   | Potri.002G186100.1 | 20.0603 | 54.8185  | -1.4503 | Down | 1.25E-35 | 8.80E-35 |
| Unigene86462  | Potri.009G166100.2 | 10.1277 | 27.6772  | -1.4504 | Down | 4.14E-16 | 1.58E-15 |
| Unigene44177  | Potri.006G069900.1 | 31.2678 | 85.4496  | -1.4504 | Down | 2.31E-81 | 3.86E-80 |
| Unigene10240  | Potri.018G097000.1 | 4.2847  | 11.7106  | -1.4505 | Down | 1.97E-18 | 8.29E-18 |

|               |                    |         |          |         |      |           |           |
|---------------|--------------------|---------|----------|---------|------|-----------|-----------|
| Unigene10692  | Potri.005G225400.1 | 4.289   | 11.7219  | -1.4505 | Down | 5.02E-57  | 5.65E-56  |
| Unigene72428  | Potri.001G406300.2 | 41.6241 | 113.761  | -1.4505 | Down | 1.53E-42  | 1.28E-41  |
| Unigene12903  | Potri.010G041700.2 | 12.0385 | 32.903   | -1.4506 | Down | 7.65E-45  | 6.68E-44  |
| Unigene38284  | Potri.001G389800.2 | 4.0527  | 11.0772  | -1.4506 | Down | 4.21E-11  | 1.28E-10  |
| Unigene18838  | Potri.001G080200.1 | 7.5156  | 20.5424  | -1.4506 | Down | 9.50E-21  | 4.33E-20  |
| Unigene32572  | Potri.016G099800.2 | 27.2372 | 74.4493  | -1.4507 | Down | 1.01E-120 | 2.74E-119 |
| Unigene53802  | Potri.013G099600.4 | 13.7486 | 37.5793  | -1.4507 | Down | 9.50E-21  | 4.33E-20  |
| Unigene24786  | Potri.018G149800.1 | 11.2066 | 30.6345  | -1.4508 | Down | 1.94E-13  | 6.61E-13  |
| Unigene54075  | Potri.010G221000.3 | 8.5002  | 23.2363  | -1.4508 | Down | 1.94E-13  | 6.61E-13  |
| Unigene51618  | Potri.008G220100.1 | 10.1263 | 27.6856  | -1.451  | Down | 6.53E-37  | 4.76E-36  |
| Unigene14305  | Potri.006G029900.1 | 30.2949 | 82.823   | -1.451  | Down | 2.67E-32  | 1.72E-31  |
| Unigene9777   | Potri.001G123400.5 | 7.9561  | 21.7516  | -1.451  | Down | 4.35E-18  | 1.80E-17  |
| Unigene11563  | Potri.011G144900.3 | 6.4976  | 17.7666  | -1.4512 | Down | 1.19E-29  | 7.13E-29  |
| Unigene31789  | Potri.004G174700.1 | 10.9225 | 29.8663  | -1.4512 | Down | 1.78E-129 | 5.24E-128 |
| Unigene42807  | Potri.014G079000.1 | 30.0282 | 82.1113  | -1.4513 | Down | 1.34E-80  | 2.21E-79  |
| Unigene92213  | Potri.002G232200.1 | 38.1069 | 104.2032 | -1.4513 | Down | 3.42E-85  | 6.03E-84  |
| Unigene118667 | Potri.T145700.1    | 4.1356  | 11.3101  | -1.4514 | Down | 9.35E-11  | 2.79E-10  |
| Unigene14677  | Potri.009G121300.2 | 54.8461 | 149.987  | -1.4514 | Down | 4.90E-94  | 9.68E-93  |
| Unigene42174  | Potri.010G171100.5 | 1.3469  | 3.6836   | -1.4515 | Down | 4.94E-06  | 1.07E-05  |
| Unigene7858   | Potri.008G035000.4 | 8.0592  | 22.0406  | -1.4515 | Down | 2.61E-29  | 1.55E-28  |
| Unigene40734  | Potri.007G124600.4 | 8.2185  | 22.4765  | -1.4515 | Down | 9.35E-11  | 2.79E-10  |
| Unigene16461  | Potri.002G257500.1 | 46.9252 | 128.3334 | -1.4515 | Down | 6.09E-57  | 6.84E-56  |
| Unigene51506  | Potri.002G170100.4 | 31.0307 | 84.873   | -1.4516 | Down | 2.66E-54  | 2.83E-53  |
| Unigene46385  | Potri.006G149500.1 | 19.5379 | 53.4436  | -1.4517 | Down | 5.72E-29  | 3.38E-28  |
| Unigene39764  | Potri.001G057400.3 | 12.8276 | 35.0866  | -1.4517 | Down | 3.42E-38  | 2.57E-37  |
| Unigene31005  | Potri.015G005400.2 | 16.0833 | 43.9948  | -1.4518 | Down | 1.17E-26  | 6.42E-26  |
| Unigene75610  | Potri.014G025400.1 | 21.506  | 58.8297  | -1.4518 | Down | 2.39E-24  | 1.22E-23  |
| Unigene16975  | Potri.004G049400.1 | 11.0257 | 30.16    | -1.4518 | Down | 1.17E-26  | 6.42E-26  |
| Unigene2048   | Potri.003G110100.5 | 3.5209  | 9.6314   | -1.4518 | Down | 2.39E-24  | 1.22E-23  |
| Unigene18343  | Potri.018G043700.1 | 4.1444  | 11.3381  | -1.4519 | Down | 3.06E-33  | 2.03E-32  |
| Unigene28408  | Potri.006G015200.1 | 8.2406  | 22.5458  | -1.452  | Down | 4.46E-15  | 1.63E-14  |
| Unigene112039 | Potri.004G234600.1 | 65.3913 | 178.8998 | -1.452  | Down | 6.36E-76  | 9.81E-75  |
| Unigene30092  | Potri.003G174400.1 | 3.192   | 8.7326   | -1.452  | Down | 2.12E-17  | 8.53E-17  |
| Unigene2887   | Potri.005G084600.2 | 4.2609  | 11.6584  | -1.4521 | Down | 5.25E-24  | 2.66E-23  |
| Unigene22197  | Potri.008G193900.1 | 14.7327 | 40.3112  | -1.4522 | Down | 1.08E-68  | 1.49E-67  |
| Unigene37554  | Potri.008G113600.1 | 19.1584 | 52.4234  | -1.4522 | Down | 1.08E-21  | 5.09E-21  |
| Unigene33536  | Potri.011G121600.4 | 19.3865 | 53.0512  | -1.4523 | Down | 4.87E-46  | 4.38E-45  |
| Unigene45570  | Potri.009G162700.1 | 9.0246  | 24.6952  | -1.4523 | Down | 2.44E-48  | 2.30E-47  |
| Unigene93109  | Potri.013G115300.2 | 3.4859  | 9.5393   | -1.4524 | Down | 2.08E-10  | 6.07E-10  |

|               |                    |         |          |         |      |           |           |
|---------------|--------------------|---------|----------|---------|------|-----------|-----------|
| Unigene12049  | Potri.010G181400.1 | 1.8781  | 5.1395   | -1.4524 | Down | 2.08E-10  | 6.07E-10  |
| Unigene7092   | Potri.001G246700.1 | 2.767   | 7.572    | -1.4524 | Down | 2.08E-10  | 6.07E-10  |
| Unigene32305  | Potri.010G178600.1 | 4.5703  | 12.5082  | -1.4525 | Down | 1.15E-23  | 5.79E-23  |
| Unigene115918 | Potri.001G350700.1 | 10.7452 | 29.4071  | -1.4525 | Down | 4.67E-17  | 1.86E-16  |
| Unigene22935  | Potri.001G003400.1 | 7.9607  | 21.7872  | -1.4525 | Down | 1.15E-23  | 5.79E-23  |
| Unigene23158  | Potri.015G006700.6 | 13.0945 | 35.8389  | -1.4526 | Down | 7.92E-37  | 5.76E-36  |
| Unigene53534  | Potri.015G002300.2 | 13.27   | 36.3212  | -1.4526 | Down | 9.86E-15  | 3.55E-14  |
| Unigene61777  | Potri.002G231100.2 | 5.4334  | 14.8717  | -1.4526 | Down | 4.68E-08  | 1.19E-07  |
| Unigene23303  | Potri.011G062100.1 | 2.0295  | 5.555    | -1.4527 | Down | 4.68E-08  | 1.19E-07  |
| Unigene27628  | Potri.010G014100.2 | 1.941   | 5.3128   | -1.4527 | Down | 4.68E-08  | 1.19E-07  |
| Unigene17962  | Potri.006G063500.2 | 10.2764 | 28.1296  | -1.4528 | Down | 1.24E-25  | 6.61E-25  |
| Unigene6794   | Potri.001G129600.1 | 27.8448 | 76.2288  | -1.4529 | Down | 2.81E-49  | 2.70E-48  |
| Unigene14696  | Potri.010G094700.1 | 17.0111 | 46.5745  | -1.4531 | Down | 5.23E-21  | 2.41E-20  |
| Unigene81545  | Potri.008G037100.1 | 26.4754 | 72.491   | -1.4531 | Down | 7.69E-34  | 5.17E-33  |
| Unigene92189  | Potri.009G092800.5 | 57.49   | 157.4212 | -1.4532 | Down | 1.90E-127 | 5.51E-126 |
| Unigene17306  | Potri.015G082800.2 | 3.6096  | 9.8843   | -1.4533 | Down | 4.62E-10  | 1.32E-09  |
| Unigene31394  | Potri.014G052700.1 | 3.5244  | 9.6508   | -1.4533 | Down | 1.12E-05  | 2.35E-05  |
| Unigene13108  | Potri.009G068300.4 | 1.8886  | 5.1715   | -1.4533 | Down | 1.12E-05  | 2.35E-05  |
| Unigene31747  | Potri.008G096200.1 | 1.7248  | 4.7231   | -1.4533 | Down | 1.12E-05  | 2.35E-05  |
| Unigene27777  | Potri.006G189400.1 | 10.7854 | 29.5337  | -1.4533 | Down | 1.09E-18  | 4.61E-18  |
| Unigene6031   | Potri.005G108200.2 | 18.2692 | 50.0265  | -1.4533 | Down | 8.36E-36  | 5.92E-35  |
| Unigene90603  | Potri.003G146500.1 | 27.6863 | 75.8133  | -1.4533 | Down | 7.40E-53  | 7.66E-52  |
| Unigene38958  | Potri.003G127600.1 | 2.8151  | 7.7085   | -1.4533 | Down | 1.12E-05  | 2.35E-05  |
| Unigene9858   | Potri.018G065800.1 | 5.6153  | 15.3779  | -1.4534 | Down | 1.69E-33  | 1.13E-32  |
| Unigene31095  | Potri.014G174200.1 | 14.8623 | 40.7017  | -1.4534 | Down | 3.16E-29  | 1.88E-28  |
| Unigene33506  | Potri.006G147500.1 | 22.7746 | 62.3668  | -1.4534 | Down | 4.48E-59  | 5.25E-58  |
| Unigene33540  | Potri.010G216100.3 | 12.956  | 35.4835  | -1.4535 | Down | 1.83E-35  | 1.29E-34  |
| Unigene46992  | Potri.008G004200.1 | 13.9209 | 38.1244  | -1.4535 | Down | 5.99E-25  | 3.13E-24  |
| Unigene38012  | Potri.016G135100.1 | 19.0523 | 52.1829  | -1.4536 | Down | 6.44E-27  | 3.57E-26  |
| Unigene52206  | Potri.001G236000.1 | 7.5879  | 20.7821  | -1.4536 | Down | 2.28E-16  | 8.79E-16  |
| Unigene18766  | Potri.006G214000.2 | 3.5202  | 9.6428   | -1.4538 | Down | 2.40E-18  | 1.00E-17  |
| Unigene74931  | Potri.013G005100.2 | 5.9885  | 16.4059  | -1.4539 | Down | 1.05E-07  | 2.59E-07  |
| Unigene21121  | Potri.001G233000.2 | 4.6459  | 12.7277  | -1.4539 | Down | 1.05E-07  | 2.59E-07  |
| Unigene19089  | Potri.T066800.1    | 57.5838 | 157.7608 | -1.454  | Down | 1.04E-123 | 2.89E-122 |
| Unigene36630  | Potri.006G262200.1 | 12.8831 | 35.2942  | -1.454  | Down | 2.54E-20  | 1.14E-19  |
| Unigene35833  | Potri.004G048700.2 | 24.9853 | 68.4494  | -1.454  | Down | 1.41E-26  | 7.77E-26  |
| Unigene38941  | Potri.001G371700.3 | 26.0952 | 71.4923  | -1.454  | Down | 6.91E-66  | 9.12E-65  |
| Unigene78031  | Potri.008G160400.2 | 18.4904 | 50.6608  | -1.4541 | Down | 2.70E-22  | 1.30E-21  |
| Unigene51461  | Potri.006G142800.1 | 23.6648 | 64.8366  | -1.4541 | Down | 1.52E-28  | 8.87E-28  |

|               |                    |          |         |         |      |           |           |
|---------------|--------------------|----------|---------|---------|------|-----------|-----------|
| Unigene44417  | Potri.015G045800.3 | 23.8112  | 65.2454 | -1.4542 | Down | 3.01E-63  | 3.78E-62  |
| Unigene44030  | Potri.001G294400.1 | 13.169   | 36.0847 | -1.4542 | Down | 1.78E-32  | 1.16E-31  |
| Unigene34083  | Potri.019G055100.1 | 19.9282  | 54.6065 | -1.4543 | Down | 7.45E-49  | 7.10E-48  |
| Unigene47044  | Potri.005G105600.1 | 7.2703   | 19.9223 | -1.4543 | Down | 1.03E-09  | 2.89E-09  |
| Unigene18012  | Potri.005G093200.1 | 5.1666   | 14.16   | -1.4545 | Down | 5.95E-22  | 2.82E-21  |
| Unigene7254   | Potri.004G162400.6 | 7.3567   | 20.1621 | -1.4545 | Down | 1.04E-11  | 3.25E-11  |
| Unigene45001  | Potri.001G086600.1 | 8.2821   | 22.6978 | -1.4545 | Down | 1.79E-50  | 1.76E-49  |
| Unigene19430  | Potri.018G015200.3 | 5.3965   | 14.7916 | -1.4547 | Down | 1.07E-13  | 3.67E-13  |
| Unigene1939   | Potri.005G020100.1 | 5.0425   | 13.8212 | -1.4547 | Down | 1.07E-13  | 3.67E-13  |
| Unigene71837  | Potri.009G019200.3 | 105.1335 | 288.191 | -1.4548 | Down | 5.38E-104 | 1.21E-102 |
| Unigene43272  | Potri.010G208200.1 | 7.3707   | 20.2056 | -1.4549 | Down | 9.41E-52  | 9.54E-51  |
| Unigene11127  | Potri.009G112100.3 | 14.7519  | 40.4436 | -1.455  | Down | 1.57E-45  | 1.39E-44  |
| Unigene11763  | Potri.006G111200.1 | 4.2785   | 11.7305 | -1.4551 | Down | 1.74E-29  | 1.04E-28  |
| Unigene13724  | Potri.001G206600.1 | 23.2179  | 63.6642 | -1.4552 | Down | 4.51E-51  | 4.50E-50  |
| Unigene13121  | Potri.001G201700.2 | 6.7541   | 18.5193 | -1.4552 | Down | 2.87E-41  | 2.32E-40  |
| Unigene2551   | Potri.019G044400.1 | 5.7266   | 15.7046 | -1.4554 | Down | 4.87E-35  | 3.38E-34  |
| Unigene40386  | Potri.014G102800.1 | 22.438   | 61.5336 | -1.4554 | Down | 3.83E-29  | 2.27E-28  |
| Unigene54770  | Potri.013G154100.1 | 3.4479   | 9.4553  | -1.4554 | Down | 2.54E-05  | 5.17E-05  |
| Unigene14142  | Potri.009G160400.1 | 7.3113   | 20.0505 | -1.4554 | Down | 4.87E-35  | 3.38E-34  |
| Unigene18917  | Potri.009G058800.1 | 4.2683   | 11.7054 | -1.4554 | Down | 2.57E-17  | 1.03E-16  |
| Unigene7260   | Potri.008G060600.3 | 2.0566   | 5.64    | -1.4554 | Down | 2.54E-05  | 5.17E-05  |
| Unigene96216  | Potri.006G095000.2 | 1.569    | 4.3028  | -1.4554 | Down | 2.54E-05  | 5.17E-05  |
| Unigene49414  | Potri.005G225000.2 | 3.799    | 10.4184 | -1.4554 | Down | 2.35E-07  | 5.67E-07  |
| Unigene49346  | Potri.003G044400.3 | 3.138    | 8.6056  | -1.4554 | Down | 2.29E-09  | 6.31E-09  |
| Unigene44420  | Potri.001G341100.1 | 13.8869  | 38.0832 | -1.4554 | Down | 3.08E-23  | 1.52E-22  |
| Unigene49043  | Potri.006G184600.1 | 16.6284  | 45.609  | -1.4557 | Down | 1.38E-40  | 1.10E-39  |
| Unigene575    | Potri.001G438300.1 | 10.5191  | 28.8522 | -1.4557 | Down | 1.38E-40  | 1.10E-39  |
| Unigene29386  | Potri.018G055000.4 | 13.4349  | 36.8523 | -1.4558 | Down | 8.41E-29  | 4.94E-28  |
| Unigene211    | Potri.006G075200.1 | 8.5679   | 23.5032 | -1.4558 | Down | 3.95E-46  | 3.56E-45  |
| Unigene93866  | Potri.006G099700.1 | 6.7049   | 18.3929 | -1.4559 | Down | 6.77E-23  | 3.31E-22  |
| Unigene47240  | Potri.002G242600.1 | 27.8779  | 76.477  | -1.4559 | Down | 3.03E-40  | 2.39E-39  |
| Unigene17357  | Potri.008G046600.1 | 8.1004   | 22.2236 | -1.456  | Down | 5.67E-17  | 2.25E-16  |
| Unigene47352  | Potri.006G199800.6 | 15.5951  | 42.7834 | -1.456  | Down | 5.98E-19  | 2.56E-18  |
| Unigene119500 | Potri.005G224000.3 | 3.8531   | 10.5705 | -1.456  | Down | 5.98E-19  | 2.56E-18  |
| Unigene32723  | Potri.001G123400.5 | 12.7626  | 35.0138 | -1.456  | Down | 2.58E-82  | 4.36E-81  |
| Unigene88892  | Potri.015G084700.1 | 16.3118  | 44.7544 | -1.4561 | Down | 1.85E-28  | 1.07E-27  |
| Unigene46132  | Potri.002G139500.1 | 12.7738  | 35.0474 | -1.4561 | Down | 5.42E-15  | 1.97E-14  |
| Unigene43928  | Potri.013G067200.2 | 15.0373  | 41.261  | -1.4562 | Down | 2.08E-47  | 1.92E-46  |
| Unigene49982  | Potri.013G007800.5 | 6.7434   | 18.5034 | -1.4562 | Down | 1.60E-24  | 8.23E-24  |

|               |                    |         |          |         |      |           |           |
|---------------|--------------------|---------|----------|---------|------|-----------|-----------|
| Unigene44385  | Potri.010G249200.3 | 12.3627 | 33.9241  | -1.4563 | Down | 1.73E-43  | 1.47E-42  |
| Unigene29392  | Potri.006G232300.4 | 35.1005 | 96.3169  | -1.4563 | Down | 9.16E-76  | 1.41E-74  |
| Unigene40966  | Potri.009G008200.1 | 4.2422  | 11.6416  | -1.4564 | Down | 1.40E-20  | 6.34E-20  |
| Unigene17439  | Potri.009G170300.1 | 5.211   | 14.3012  | -1.4565 | Down | 1.32E-18  | 5.57E-18  |
| Unigene54142  | Potri.006G020700.6 | 11.851  | 32.5245  | -1.4565 | Down | 1.32E-18  | 5.57E-18  |
| Unigene118075 | Potri.005G097500.1 | 17.4986 | 48.0238  | -1.4565 | Down | 1.23E-35  | 8.65E-35  |
| Unigene33321  | Potri.004G189700.2 | 10.304  | 28.2803  | -1.4566 | Down | 3.48E-41  | 2.81E-40  |
| Unigene11350  | Potri.003G020300.2 | 20.4937 | 56.2479  | -1.4566 | Down | 3.60E-71  | 5.15E-70  |
| Unigene33100  | Potri.015G103300.1 | 2.7678  | 7.5968   | -1.4567 | Down | 5.11E-09  | 1.38E-08  |
| Unigene2995   | Potri.014G179300.1 | 3.8538  | 10.5777  | -1.4567 | Down | 1.25E-16  | 4.89E-16  |
| Unigene40258  | Potri.010G048300.1 | 5.1864  | 14.237   | -1.4568 | Down | 1.20E-14  | 4.30E-14  |
| Unigene8300   | Potri.018G097300.1 | 16.97   | 46.5889  | -1.457  | Down | 6.42E-37  | 4.68E-36  |
| Unigene31511  | Potri.004G038500.1 | 40.5907 | 111.438  | -1.457  | Down | 5.24E-48  | 4.92E-47  |
| Unigene101283 | Potri.015G105700.2 | 2.414   | 6.6276   | -1.4571 | Down | 5.27E-07  | 1.24E-06  |
| Unigene48454  | Potri.014G180700.1 | 10.2781 | 28.2189  | -1.4571 | Down | 1.16E-12  | 3.79E-12  |
| Unigene52604  | Potri.012G133100.1 | 3.2209  | 8.843    | -1.4571 | Down | 5.27E-07  | 1.24E-06  |
| Unigene108610 | Potri.006G203000.7 | 5.5591  | 15.2627  | -1.4571 | Down | 5.27E-07  | 1.24E-06  |
| Unigene66626  | Potri.005G083900.3 | 11.9624 | 32.8463  | -1.4572 | Down | 1.96E-27  | 1.10E-26  |
| Unigene81489  | Potri.005G115700.1 | 92.4444 | 253.8759 | -1.4575 | Down | 1.24E-114 | 3.15E-113 |
| Unigene31208  | Potri.018G006500.1 | 6.7904  | 18.6501  | -1.4576 | Down | 2.65E-14  | 9.35E-14  |
| Unigene29359  | Potri.007G094000.1 | 10.399  | 28.561   | -1.4576 | Down | 8.04E-40  | 6.28E-39  |
| Unigene15126  | Potri.006G224600.2 | 50.3083 | 138.1677 | -1.4576 | Down | 7.48E-80  | 1.22E-78  |
| Unigene45085  | Potri.003G008400.1 | 3.7247  | 10.23    | -1.4576 | Down | 2.65E-14  | 9.35E-14  |
| Unigene45072  | Potri.018G127200.1 | 42.1285 | 115.7119 | -1.4577 | Down | 3.46E-92  | 6.67E-91  |
| Unigene100077 | Potri.018G109600.1 | 4.5408  | 12.4749  | -1.458  | Down | 9.46E-27  | 5.22E-26  |
| Unigene19652  | Potri.016G042000.1 | 3.3453  | 9.1903   | -1.458  | Down | 5.77E-05  | 1.13E-04  |
| Unigene88659  | Potri.015G052200.2 | 6.6212  | 18.1903  | -1.458  | Down | 2.57E-12  | 8.27E-12  |
| Unigene18067  | Potri.013G047100.2 | 3.7362  | 10.2643  | -1.458  | Down | 2.57E-12  | 8.27E-12  |
| Unigene30801  | Potri.008G196200.1 | 1.1566  | 3.1774   | -1.458  | Down | 5.77E-05  | 1.13E-04  |
| Unigene10416  | Potri.008G092300.1 | 3.3155  | 9.1086   | -1.458  | Down | 1.14E-08  | 3.00E-08  |
| Unigene49684  | Potri.008G052500.1 | 4.8917  | 13.439   | -1.458  | Down | 1.14E-08  | 3.00E-08  |
| Unigene50775  | Potri.006G216100.1 | 1.8041  | 4.9563   | -1.458  | Down | 1.14E-08  | 3.00E-08  |
| Unigene26092  | Potri.006G115300.1 | 1.1936  | 3.2791   | -1.458  | Down | 5.77E-05  | 1.13E-04  |
| Unigene47780  | Potri.001G183100.1 | 2.7527  | 7.5625   | -1.458  | Down | 5.77E-05  | 1.13E-04  |
| Unigene31710  | Potri.007G086900.3 | 31.065  | 85.3501  | -1.4581 | Down | 1.83E-53  | 1.92E-52  |
| Unigene43269  | Potri.010G220100.4 | 9.1862  | 25.2403  | -1.4582 | Down | 2.24E-28  | 1.30E-27  |
| Unigene990    | Potri.018G084700.1 | 9.4729  | 26.0296  | -1.4583 | Down | 3.39E-76  | 5.26E-75  |
| Unigene104037 | Potri.003G153400.5 | 2.219   | 6.0976   | -1.4583 | Down | 1.41E-17  | 5.74E-17  |
| Unigene39667  | Potri.019G051300.1 | 3.0749  | 8.4499   | -1.4584 | Down | 5.86E-14  | 2.04E-13  |

|               |                    |         |          |         |      |           |           |
|---------------|--------------------|---------|----------|---------|------|-----------|-----------|
| Unigene19534  | Potri.011G031300.1 | 5.8096  | 15.9652  | -1.4584 | Down | 5.86E-14  | 2.04E-13  |
| Unigene44670  | Potri.006G146600.1 | 3.6872  | 10.1327  | -1.4584 | Down | 5.86E-14  | 2.04E-13  |
| Unigene38549  | Potri.001G170700.1 | 5.2847  | 14.5228  | -1.4584 | Down | 5.86E-14  | 2.04E-13  |
| Unigene33852  | Potri.005G192400.2 | 11.9006 | 32.7061  | -1.4585 | Down | 2.03E-40  | 1.60E-39  |
| Unigene44270  | Potri.018G021100.2 | 4.6864  | 12.8799  | -1.4586 | Down | 2.53E-10  | 7.34E-10  |
| Unigene41379  | Potri.006G040900.3 | 6.1746  | 16.9701  | -1.4586 | Down | 2.53E-10  | 7.34E-10  |
| Unigene44789  | Potri.004G053300.2 | 2.3675  | 6.5067   | -1.4586 | Down | 2.53E-10  | 7.34E-10  |
| Unigene3844   | Potri.001G285800.1 | 41.0056 | 112.6989 | -1.4586 | Down | 3.57E-63  | 4.49E-62  |
| Unigene81026  | Potri.001G269900.1 | 43.5161 | 119.5988 | -1.4586 | Down | 2.11E-54  | 2.25E-53  |
| Unigene53823  | Potri.001G013600.1 | 5.8579  | 16.0998  | -1.4586 | Down | 2.53E-10  | 7.34E-10  |
| Unigene42515  | Potri.007G076500.5 | 6.7908  | 18.6651  | -1.4587 | Down | 1.86E-38  | 1.40E-37  |
| Unigene18616  | Potri.012G081800.1 | 6.305   | 17.3311  | -1.4588 | Down | 7.70E-21  | 3.52E-20  |
| Unigene6395   | Potri.008G012200.2 | 6.0462  | 16.6201  | -1.4588 | Down | 4.57E-26  | 2.47E-25  |
| Unigene50289  | Potri.002G154800.1 | 4.6516  | 12.7862  | -1.4588 | Down | 7.70E-21  | 3.52E-20  |
| Unigene43867  | Potri.012G063400.1 | 36.5991 | 100.6202 | -1.459  | Down | 4.80E-114 | 1.21E-112 |
| Unigene7202   | Potri.011G050500.2 | 3.1628  | 8.695    | -1.459  | Down | 1.19E-06  | 2.71E-06  |
| Unigene111619 | Potri.010G100100.1 | 9.2452  | 25.4163  | -1.459  | Down | 5.69E-12  | 1.80E-11  |
| Unigene101486 | Potri.006G109900.1 | 4.0211  | 11.0547  | -1.459  | Down | 1.19E-06  | 2.71E-06  |
| Unigene80453  | Potri.001G302000.1 | 21.8082 | 59.9537  | -1.459  | Down | 1.08E-27  | 6.13E-27  |
| Unigene47467  | Potri.007G069500.1 | 11.4839 | 31.5741  | -1.4591 | Down | 4.25E-24  | 2.17E-23  |
| Unigene457    | Potri.001G300500.1 | 8.3465  | 22.947   | -1.4591 | Down | 6.10E-45  | 5.34E-44  |
| Unigene34004  | Potri.008G140700.1 | 5.3364  | 14.6727  | -1.4592 | Down | 7.26E-19  | 3.10E-18  |
| Unigene78691  | Potri.014G001000.3 | 16.4557 | 45.2506  | -1.4593 | Down | 1.70E-20  | 7.67E-20  |
| Unigene52617  | Potri.011G070900.2 | 30.4053 | 83.6081  | -1.4593 | Down | 1.97E-63  | 2.49E-62  |
| Unigene2205   | Potri.014G072600.1 | 10.6252 | 29.2183  | -1.4594 | Down | 2.37E-27  | 1.33E-26  |
| Unigene11880  | Potri.002G253200.1 | 22.3395 | 61.4342  | -1.4594 | Down | 1.79E-61  | 2.19E-60  |
| Unigene18342  | Potri.016G066600.2 | 5.9179  | 16.2764  | -1.4596 | Down | 4.68E-39  | 3.59E-38  |
| Unigene24435  | Potri.006G211200.1 | 6.426   | 17.6753  | -1.4597 | Down | 7.55E-34  | 5.08E-33  |
| Unigene1339   | Potri.003G105200.2 | 10.7222 | 29.4937  | -1.4598 | Down | 1.80E-35  | 1.26E-34  |
| Unigene4089   | Potri.018G150600.2 | 7.6991  | 21.1798  | -1.4599 | Down | 3.73E-20  | 1.67E-19  |
| Unigene11831  | Potri.010G209700.1 | 6.2305  | 17.1409  | -1.46   | Down | 5.87E-42  | 4.82E-41  |
| Unigene47309  | Potri.006G178200.1 | 68.7631 | 189.1712 | -1.46   | Down | 5.34E-99  | 1.13E-97  |
| Unigene49997  | Potri.003G218600.4 | 3.4411  | 9.467    | -1.46   | Down | 1.26E-11  | 3.93E-11  |
| Unigene29789  | Potri.002G158200.2 | 4.2455  | 11.6798  | -1.46   | Down | 1.26E-11  | 3.93E-11  |
| Unigene118284 | Potri.008G118900.1 | 27.007  | 74.3047  | -1.4601 | Down | 7.10E-57  | 7.97E-56  |
| Unigene68019  | Potri.014G075200.3 | 5.8351  | 16.0547  | -1.4602 | Down | 4.85E-25  | 2.54E-24  |
| Unigene49164  | Potri.012G020500.1 | 11.8642 | 32.6447  | -1.4602 | Down | 1.15E-26  | 6.31E-26  |
| Unigene9727   | Potri.019G112000.1 | 7.0592  | 19.4246  | -1.4603 | Down | 6.58E-15  | 2.39E-14  |
| Unigene40999  | Potri.014G058500.2 | 10.1477 | 27.9228  | -1.4603 | Down | 6.58E-15  | 2.39E-14  |



|               |                    |         |          |         |      |          |          |
|---------------|--------------------|---------|----------|---------|------|----------|----------|
| Unigene6503   | Potri.001G243400.1 | 4.5698  | 12.5745  | -1.4603 | Down | 6.58E-15 | 2.39E-14 |
| Unigene2199   | Potri.005G192400.2 | 33.3032 | 91.6469  | -1.4604 | Down | 1.26E-64 | 1.63E-63 |
| Unigene16922  | Potri.018G086200.1 | 10.9571 | 30.1542  | -1.4605 | Down | 2.07E-36 | 1.49E-35 |
| Unigene2543   | Potri.014G163400.1 | 14.0064 | 38.545   | -1.4605 | Down | 2.45E-51 | 2.46E-50 |
| Unigene13235  | Potri.014G161600.2 | 9.9927  | 27.5008  | -1.4605 | Down | 8.22E-20 | 3.64E-19 |
| Unigene7675   | Potri.004G140400.2 | 9.7074  | 26.7144  | -1.4605 | Down | 8.66E-35 | 5.96E-34 |
| Unigene28890  | Potri.006G100800.1 | 6.3367  | 17.4395  | -1.4606 | Down | 1.18E-39 | 9.16E-39 |
| Unigene22550  | Potri.001G013600.1 | 5.9579  | 16.3977  | -1.4606 | Down | 4.53E-23 | 2.23E-22 |
| Unigene32863  | Potri.012G019900.4 | 6.8114  | 18.7475  | -1.4607 | Down | 2.41E-95 | 4.84E-94 |
| Unigene71445  | Potri.018G053800.5 | 36.7483 | 101.1559 | -1.4608 | Down | 1.08E-37 | 8.03E-37 |
| Unigene69053  | Potri.008G202200.1 | 5.1208  | 14.0951  | -1.4608 | Down | 1.41E-29 | 8.48E-29 |
| Unigene1763   | Potri.013G061400.1 | 4.5718  | 12.585   | -1.4609 | Down | 1.48E-42 | 1.23E-41 |
| Unigene37040  | Potri.009G088400.1 | 38.6212 | 106.3168 | -1.4609 | Down | 4.89E-49 | 4.68E-48 |
| Unigene7285   | Potri.002G124300.1 | 28.3275 | 77.981   | -1.4609 | Down | 2.82E-52 | 2.89E-51 |
| Unigene20354  | Potri.017G106300.1 | 6.1839  | 17.0258  | -1.4611 | Down | 6.35E-13 | 2.11E-12 |
| Unigene10076  | Potri.014G104000.4 | 7.0567  | 19.4289  | -1.4611 | Down | 6.35E-13 | 2.11E-12 |
| Unigene19033  | Potri.013G092900.2 | 7.5207  | 20.7064  | -1.4611 | Down | 1.81E-19 | 7.91E-19 |
| Unigene524    | Potri.013G033900.1 | 2.7917  | 7.6862   | -1.4611 | Down | 1.45E-14 | 5.20E-14 |
| Unigene27978  | Potri.009G152800.1 | 14.7154 | 40.5155  | -1.4611 | Down | 1.31E-27 | 7.42E-27 |
| Unigene36459  | Potri.009G125400.1 | 11.0517 | 30.4283  | -1.4611 | Down | 1.45E-14 | 5.20E-14 |
| Unigene27812  | Potri.008G036400.2 | 21.5858 | 59.4313  | -1.4611 | Down | 1.07E-48 | 1.02E-47 |
| Unigene65034  | Potri.007G014200.8 | 5.8637  | 16.1443  | -1.4611 | Down | 5.70E-08 | 1.44E-07 |
| Unigene17983  | Potri.006G156700.1 | 1.519   | 4.1822   | -1.4611 | Down | 1.32E-04 | 2.50E-04 |
| Unigene97574  | Potri.006G004700.2 | 1.1153  | 3.0706   | -1.4611 | Down | 1.32E-04 | 2.50E-04 |
| Unigene53309  | Potri.004G203500.1 | 13.8982 | 38.2655  | -1.4611 | Down | 9.95E-23 | 4.84E-22 |
| Unigene71408  | Potri.003G139200.1 | 6.6147  | 18.212   | -1.4611 | Down | 5.70E-08 | 1.44E-07 |
| Unigene2904   | Potri.003G044500.1 | 2.241   | 6.17     | -1.4611 | Down | 1.25E-09 | 3.49E-09 |
| Unigene62513  | Potri.003G020500.1 | 1.4462  | 3.9817   | -1.4611 | Down | 1.45E-14 | 5.20E-14 |
| Unigene20864  | Potri.002G066000.3 | 9.8977  | 27.2509  | -1.4611 | Down | 4.24E-21 | 1.96E-20 |
| Unigene104951 | Potri.001G317400.2 | 1.4105  | 3.8834   | -1.4611 | Down | 1.32E-04 | 2.50E-04 |
| Unigene117922 | Potri.001G243800.1 | 1.7084  | 4.7036   | -1.4611 | Down | 1.32E-04 | 2.50E-04 |
| Unigene80146  | Potri.001G007800.1 | 17.74   | 48.843   | -1.4611 | Down | 9.95E-23 | 4.84E-22 |
| Unigene101244 | Potri.017G094900.1 | 1.4194  | 3.9081   | -1.4612 | Down | 1.32E-04 | 2.50E-04 |
| Unigene63727  | Potri.016G116200.3 | 4.0608  | 11.1806  | -1.4612 | Down | 2.67E-06 | 5.94E-06 |
| Unigene41662  | Potri.003G079400.1 | 3.1471  | 8.6649   | -1.4612 | Down | 2.67E-06 | 5.94E-06 |
| Unigene48864  | Potri.019G081600.2 | 13.6052 | 37.4678  | -1.4615 | Down | 9.15E-34 | 6.14E-33 |
| Unigene39379  | Potri.014G052300.2 | 4.5109  | 12.4231  | -1.4615 | Down | 1.62E-30 | 9.95E-30 |
| Unigene7966   | Potri.014G123800.3 | 6.5714  | 18.0983  | -1.4616 | Down | 2.88E-27 | 1.61E-26 |
| Unigene42902  | Potri.017G155000.1 | 9.1575  | 25.2234  | -1.4617 | Down | 4.44E-78 | 7.08E-77 |

|               |                    |         |          |         |      |           |           |
|---------------|--------------------|---------|----------|---------|------|-----------|-----------|
| Unigene53506  | Potri.009G052800.1 | 17.8229 | 49.0933  | -1.4618 | Down | 3.99E-19  | 1.72E-18  |
| Unigene29192  | Potri.007G047500.1 | 5.6885  | 15.6707  | -1.4619 | Down | 7.40E-16  | 2.80E-15  |
| Unigene10612  | Potri.003G053300.1 | 4.3836  | 12.0754  | -1.4619 | Down | 8.43E-32  | 5.38E-31  |
| Unigene41867  | Potri.001G142600.1 | 14.6446 | 40.344   | -1.462  | Down | 1.97E-55  | 2.15E-54  |
| Unigene43287  | Potri.002G077900.3 | 2.4678  | 6.7992   | -1.4621 | Down | 1.41E-12  | 4.59E-12  |
| Unigene842    | Potri.002G042600.2 | 11.1021 | 30.588   | -1.4621 | Down | 2.47E-47  | 2.28E-46  |
| Unigene11905  | Potri.016G018300.1 | 8.8878  | 24.4879  | -1.4622 | Down | 1.13E-23  | 5.69E-23  |
| Unigene46483  | Potri.012G073300.1 | 9.0648  | 24.9757  | -1.4622 | Down | 1.41E-12  | 4.59E-12  |
| Unigene46983  | Potri.010G239400.1 | 9.2868  | 25.5873  | -1.4622 | Down | 1.41E-12  | 4.59E-12  |
| Unigene73081  | Potri.009G018800.1 | 32.6594 | 89.9841  | -1.4622 | Down | 1.05E-34  | 7.21E-34  |
| Unigene19798  | Potri.019G042700.4 | 9.2361  | 25.4506  | -1.4623 | Down | 6.22E-11  | 1.87E-10  |
| Unigene7020   | Potri.004G225800.5 | 16.0277 | 44.1639  | -1.4623 | Down | 7.48E-41  | 5.99E-40  |
| Unigene41398  | Potri.010G021200.1 | 4.6963  | 12.941   | -1.4624 | Down | 6.22E-11  | 1.87E-10  |
| Unigene2387   | Potri.007G098500.2 | 4.2287  | 11.6525  | -1.4624 | Down | 7.79E-30  | 4.71E-29  |
| Unigene44902  | Potri.015G013200.1 | 6.3145  | 17.403   | -1.4626 | Down | 9.66E-33  | 6.33E-32  |
| Unigene28304  | Potri.014G142700.1 | 4.4063  | 12.1439  | -1.4626 | Down | 2.79E-09  | 7.64E-09  |
| Unigene94571  | Potri.009G043100.4 | 26.9107 | 74.1673  | -1.4626 | Down | 1.64E-40  | 1.30E-39  |
| Unigene98565  | Potri.001G164000.1 | 4.7035  | 12.963   | -1.4626 | Down | 2.79E-09  | 7.64E-09  |
| Unigene27860  | Potri.019G126500.5 | 13.5322 | 37.299   | -1.4627 | Down | 2.87E-37  | 2.11E-36  |
| Unigene20015  | Potri.008G059500.1 | 31.9479 | 88.058   | -1.4627 | Down | 2.87E-37  | 2.11E-36  |
| Unigene65969  | Potri.014G017000.2 | 3.8759  | 10.6835  | -1.4628 | Down | 1.63E-15  | 6.08E-15  |
| Unigene69977  | Potri.011G127600.1 | 3.8152  | 10.517   | -1.4629 | Down | 5.05E-34  | 3.41E-33  |
| Unigene44123  | Potri.009G113700.1 | 5.3243  | 14.6769  | -1.4629 | Down | 5.05E-34  | 3.41E-33  |
| Unigene23410  | Potri.008G012600.1 | 15.3486 | 42.3099  | -1.4629 | Down | 5.05E-34  | 3.41E-33  |
| Unigene32425  | Potri.004G018100.5 | 7.5117  | 20.7065  | -1.4629 | Down | 7.22E-28  | 4.12E-27  |
| Unigene2930   | Potri.011G046900.1 | 6.3212  | 17.4261  | -1.463  | Down | 7.85E-51  | 7.79E-50  |
| Unigene11913  | Potri.010G002000.1 | 34.007  | 93.7486  | -1.463  | Down | 4.36E-132 | 1.33E-130 |
| Unigene48949  | Potri.008G193300.2 | 10.1726 | 28.0437  | -1.463  | Down | 4.53E-20  | 2.02E-19  |
| Unigene101642 | Potri.002G162000.1 | 2.013   | 5.5494   | -1.463  | Down | 1.28E-07  | 3.14E-07  |
| Unigene41141  | Potri.001G370900.1 | 4.6624  | 12.8534  | -1.463  | Down | 1.28E-07  | 3.14E-07  |
| Unigene51728  | Potri.003G151700.1 | 15.8721 | 43.7607  | -1.4631 | Down | 1.88E-41  | 1.53E-40  |
| Unigene54059  | Potri.002G006200.3 | 43.1056 | 118.8496 | -1.4632 | Down | 5.68E-46  | 5.09E-45  |
| Unigene2739   | Potri.001G457600.3 | 4.5285  | 12.4857  | -1.4632 | Down | 1.94E-18  | 8.15E-18  |
| Unigene53050  | Potri.004G201900.1 | 10.5295 | 29.0333  | -1.4633 | Down | 3.12E-12  | 1.00E-11  |
| Unigene37440  | Potri.015G089300.1 | 39.2889 | 108.3393 | -1.4634 | Down | 4.61E-73  | 6.80E-72  |
| Unigene32839  | Potri.007G076500.5 | 8.3828  | 23.1169  | -1.4634 | Down | 2.33E-21  | 1.09E-20  |
| Unigene53307  | Potri.014G081700.1 | 15.9685 | 44.0368  | -1.4635 | Down | 6.70E-26  | 3.60E-25  |
| Unigene28796  | Potri.014G055900.1 | 6.1478  | 16.9539  | -1.4635 | Down | 6.70E-26  | 3.60E-25  |
| Unigene13777  | Potri.010G036700.1 | 16.7144 | 46.0929  | -1.4635 | Down | 1.26E-104 | 2.84E-103 |

|               |                    |         |          |         |      |          |          |
|---------------|--------------------|---------|----------|---------|------|----------|----------|
| Unigene44581  | Potri.018G138000.1 | 2.1412  | 5.9055   | -1.4636 | Down | 1.38E-10 | 4.08E-10 |
| Unigene49230  | Potri.016G087000.1 | 2.8214  | 7.7817   | -1.4637 | Down | 1.38E-10 | 4.08E-10 |
| Unigene98966  | Potri.004G210100.2 | 75.6908 | 208.767  | -1.4637 | Down | 6.80E-77 | 1.07E-75 |
| Unigene37288  | Potri.004G141800.1 | 7.5812  | 20.9094  | -1.4637 | Down | 1.38E-10 | 4.08E-10 |
| Unigene74272  | Potri.001G361100.1 | 41.8102 | 115.3222 | -1.4637 | Down | 2.73E-45 | 2.41E-44 |
| Unigene37799  | Potri.003G117100.1 | 19.9971 | 55.1592  | -1.4638 | Down | 3.48E-27 | 1.95E-26 |
| Unigene21420  | Potri.005G182300.1 | 13.8114 | 38.1001  | -1.4639 | Down | 1.67E-58 | 1.94E-57 |
| Unigene54300  | Potri.013G062800.1 | 7.3267  | 20.2122  | -1.464  | Down | 1.47E-25 | 7.84E-25 |
| Unigene92820  | Potri.008G002300.2 | 22.3944 | 61.7808  | -1.464  | Down | 6.95E-57 | 7.81E-56 |
| Unigene28873  | Potri.006G216900.1 | 6.7782  | 18.6996  | -1.464  | Down | 5.33E-33 | 3.52E-32 |
| Unigene41643  | Potri.003G134200.1 | 22.2229 | 61.3106  | -1.4641 | Down | 7.52E-48 | 7.03E-47 |
| Unigene106055 | Potri.014G148900.2 | 4.2957  | 11.8524  | -1.4642 | Down | 6.22E-09 | 1.66E-08 |
| Unigene44539  | Potri.012G145000.1 | 17.9915 | 49.6405  | -1.4642 | Down | 3.14E-46 | 2.83E-45 |
| Unigene30768  | Potri.012G044600.1 | 2.0255  | 5.5887   | -1.4642 | Down | 6.22E-09 | 1.66E-08 |
| Unigene23363  | Potri.010G083400.3 | 3.7667  | 10.3927  | -1.4642 | Down | 6.24E-24 | 3.16E-23 |
| Unigene119436 | Potri.007G121700.1 | 1.9581  | 5.4026   | -1.4642 | Down | 6.22E-09 | 1.66E-08 |
| Unigene52857  | Potri.005G224500.1 | 3.0525  | 8.422    | -1.4642 | Down | 6.22E-09 | 1.66E-08 |
| Unigene78432  | Potri.019G132300.1 | 15.4234 | 42.559   | -1.4643 | Down | 2.20E-19 | 9.56E-19 |
| Unigene50005  | Potri.006G045800.1 | 5.6323  | 15.5416  | -1.4643 | Down | 2.20E-19 | 9.56E-19 |
| Unigene17261  | Potri.007G023700.2 | 5.6245  | 15.5213  | -1.4645 | Down | 6.91E-12 | 2.18E-11 |
| Unigene20146  | Potri.008G163300.2 | 17.3138 | 47.7847  | -1.4646 | Down | 4.92E-31 | 3.07E-30 |
| Unigene12665  | Potri.006G065000.1 | 5.2361  | 14.4515  | -1.4647 | Down | 9.43E-18 | 3.85E-17 |
| Unigene93555  | Potri.001G179100.1 | 16.626  | 45.8876  | -1.4647 | Down | 4.56E-50 | 4.45E-49 |
| Unigene32029  | Potri.011G135600.2 | 12.1353 | 33.4961  | -1.4648 | Down | 4.17E-95 | 8.36E-94 |
| Unigene6310   | Potri.012G131800.1 | 1.7762  | 4.9036   | -1.465  | Down | 3.03E-04 | 5.52E-04 |
| Unigene7160   | Potri.010G082400.1 | 1.6306  | 4.5016   | -1.465  | Down | 3.03E-04 | 5.52E-04 |
| Unigene40656  | Potri.009G068100.3 | 1.842   | 5.0852   | -1.465  | Down | 3.03E-04 | 5.52E-04 |
| Unigene23711  | Potri.004G230800.2 | 3.5683  | 9.8511   | -1.465  | Down | 3.48E-13 | 1.17E-12 |
| Unigene53073  | Potri.003G222600.2 | 2.8151  | 7.7717   | -1.465  | Down | 3.03E-04 | 5.52E-04 |
| Unigene24446  | Potri.001G379700.1 | 1.4059  | 3.8813   | -1.465  | Down | 2.86E-07 | 6.88E-07 |
| Unigene39970  | Potri.T034500.1    | 13.0209 | 35.9475  | -1.4651 | Down | 1.67E-36 | 1.20E-35 |
| Unigene15619  | Potri.014G165300.5 | 14.142  | 39.0425  | -1.4651 | Down | 4.07E-16 | 1.56E-15 |
| Unigene87081  | Potri.012G143500.4 | 1.9189  | 5.2977   | -1.4651 | Down | 3.03E-04 | 5.52E-04 |
| Unigene16454  | Potri.011G133100.4 | 2.2713  | 6.2706   | -1.4651 | Down | 3.48E-13 | 1.17E-12 |
| Unigene5731   | Potri.010G100900.1 | 12.3474 | 34.0881  | -1.4651 | Down | 4.84E-19 | 2.08E-18 |
| Unigene67866  | Potri.010G057600.1 | 1.4901  | 4.1138   | -1.4651 | Down | 2.86E-07 | 6.88E-07 |
| Unigene23643  | Potri.009G066000.1 | 16.3623 | 45.1721  | -1.4651 | Down | 8.41E-57 | 9.43E-56 |
| Unigene14654  | Potri.002G142700.1 | 5.9679  | 16.4759  | -1.4651 | Down | 3.48E-13 | 1.17E-12 |
| Unigene15454  | Potri.002G139000.1 | 11.5882 | 31.9921  | -1.4651 | Down | 4.84E-19 | 2.08E-18 |

|               |                     |         |          |         |      |           |           |
|---------------|---------------------|---------|----------|---------|------|-----------|-----------|
| Unigene13951  | Potri.001G008800.1  | 15.421  | 42.5735  | -1.4651 | Down | 1.08E-30  | 6.69E-30  |
| Unigene28290  | Potri.006G219100.3  | 18.9352 | 52.2818  | -1.4652 | Down | 8.75E-38  | 6.51E-37  |
| Unigene45664  | Potri.006G039000.1  | 11.803  | 32.5886  | -1.4652 | Down | 1.38E-43  | 1.17E-42  |
| Unigene53269  | Potri.015G069100.4  | 21.6286 | 59.7197  | -1.4653 | Down | 5.63E-32  | 3.61E-31  |
| Unigene50388  | Potri.014G075200.3  | 28.1065 | 77.6102  | -1.4653 | Down | 2.53E-69  | 3.52E-68  |
| Unigene29829  | Potri.015G030800.1  | 9.8509  | 27.2023  | -1.4654 | Down | 2.49E-20  | 1.12E-19  |
| Unigene41705  | Potri.006G133900.4  | 10.7615 | 29.7168  | -1.4654 | Down | 2.49E-20  | 1.12E-19  |
| Unigene47498  | Potri.008G118900.1  | 10.2646 | 28.3477  | -1.4656 | Down | 1.76E-14  | 6.28E-14  |
| Unigene40898  | Potri.015G037900.1  | 5.5147  | 15.2315  | -1.4657 | Down | 1.53E-11  | 4.75E-11  |
| Unigene11832  | Potri.004G140600.10 | 9.2867  | 25.651   | -1.4658 | Down | 8.31E-46  | 7.43E-45  |
| Unigene66624  | Potri.001G226500.1  | 3.1692  | 8.7549   | -1.466  | Down | 1.39E-08  | 3.64E-08  |
| Unigene51854  | Potri.T087500.1     | 15.8288 | 43.731   | -1.4661 | Down | 5.49E-20  | 2.44E-19  |
| Unigene38654  | Potri.014G163200.2  | 3.8092  | 10.5237  | -1.4661 | Down | 5.49E-20  | 2.44E-19  |
| Unigene1661   | Potri.010G094400.1  | 53.503  | 147.8181 | -1.4661 | Down | 5.44E-186 | 2.60E-184 |
| Unigene33787  | Potri.009G096700.1  | 8.3903  | 23.1803  | -1.4661 | Down | 5.49E-20  | 2.44E-19  |
| Unigene12182  | Potri.006G109600.3  | 8.504   | 23.4943  | -1.4661 | Down | 5.49E-20  | 2.44E-19  |
| Unigene112191 | Potri.006G047100.4  | 15.6969 | 43.3665  | -1.4661 | Down | 5.49E-20  | 2.44E-19  |
| Unigene40793  | Potri.013G115400.3  | 9.3249  | 25.7639  | -1.4662 | Down | 7.71E-13  | 2.55E-12  |
| Unigene66264  | Potri.010G198800.2  | 6.0539  | 16.7263  | -1.4662 | Down | 7.71E-13  | 2.55E-12  |
| Unigene72158  | Potri.001G136000.2  | 11.2261 | 31.0167  | -1.4662 | Down | 7.71E-13  | 2.55E-12  |
| Unigene26299  | Potri.010G115700.2  | 12.2886 | 33.9549  | -1.4663 | Down | 4.59E-17  | 1.83E-16  |
| Unigene41703  | Potri.005G231300.1  | 23.0942 | 63.813   | -1.4663 | Down | 3.34E-52  | 3.41E-51  |
| Unigene24180  | Potri.019G018700.5  | 10.2114 | 28.2171  | -1.4664 | Down | 3.99E-45  | 3.51E-44  |
| Unigene43575  | Potri.013G115400.1  | 12.9629 | 35.8209  | -1.4664 | Down | 3.04E-77  | 4.79E-76  |
| Unigene22668  | Potri.002G122000.1  | 7.5173  | 20.7727  | -1.4664 | Down | 1.78E-25  | 9.47E-25  |
| Unigene23547  | Potri.015G056700.3  | 39.0224 | 107.8411 | -1.4665 | Down | 5.74E-84  | 9.93E-83  |
| Unigene72661  | Potri.018G026400.4  | 20.6223 | 56.9934  | -1.4666 | Down | 1.46E-22  | 7.07E-22  |
| Unigene47869  | Potri.014G114300.2  | 16.1106 | 44.5245  | -1.4666 | Down | 3.87E-35  | 2.69E-34  |
| Unigene47875  | Potri.010G112800.1  | 5.6772  | 15.69    | -1.4666 | Down | 2.53E-39  | 1.95E-38  |
| Unigene22166  | Potri.009G159000.1  | 18.2823 | 50.5284  | -1.4666 | Down | 5.21E-74  | 7.79E-73  |
| Unigene40094  | Potri.006G256400.1  | 2.5121  | 6.9427   | -1.4666 | Down | 6.84E-10  | 1.94E-09  |
| Unigene17471  | Potri.013G061200.1  | 23.8277 | 65.8563  | -1.4667 | Down | 5.79E-49  | 5.53E-48  |
| Unigene21613  | Potri.012G066200.1  | 8.1884  | 22.6327  | -1.4668 | Down | 2.03E-54  | 2.16E-53  |
| Unigene69501  | Potri.004G236900.3  | 6.6822  | 18.4699  | -1.4668 | Down | 7.56E-24  | 3.82E-23  |
| Unigene32050  | Potri.001G012200.2  | 2.6078  | 7.2084   | -1.4668 | Down | 1.21E-19  | 5.31E-19  |
| Unigene39660  | Potri.013G087100.1  | 6.5848  | 18.2024  | -1.4669 | Down | 2.51E-29  | 1.49E-28  |
| Unigene25491  | Potri.002G139000.1  | 34.2937 | 94.7959  | -1.4669 | Down | 2.41E-47  | 2.23E-46  |
| Unigene42455  | Potri.001G078600.1  | 7.2216  | 19.9623  | -1.4669 | Down | 5.24E-148 | 1.85E-146 |
| Unigene17217  | Potri.013G104300.2  | 5.2764  | 14.5868  | -1.467  | Down | 1.31E-30  | 8.07E-30  |

|               |                    |          |          |         |      |           |           |
|---------------|--------------------|----------|----------|---------|------|-----------|-----------|
| Unigene43721  | Potri.010G157400.1 | 25.7767  | 71.257   | -1.467  | Down | 4.72E-72  | 6.85E-71  |
| Unigene2731   | Potri.005G249300.3 | 10.8861  | 30.0934  | -1.467  | Down | 1.27E-48  | 1.20E-47  |
| Unigene60932  | Potri.001G287900.6 | 3.0745   | 8.4995   | -1.467  | Down | 3.40E-11  | 1.04E-10  |
| Unigene11506  | Potri.001G213900.5 | 9.6307   | 26.6233  | -1.467  | Down | 1.11E-114 | 2.84E-113 |
| Unigene29358  | Potri.018G100300.1 | 7.0351   | 19.4491  | -1.4671 | Down | 3.40E-11  | 1.04E-10  |
| Unigene19463  | Potri.009G084800.2 | 33.9875  | 93.9637  | -1.4671 | Down | 4.69E-80  | 7.71E-79  |
| Unigene39822  | Potri.007G067700.2 | 3.7194   | 10.2826  | -1.4671 | Down | 6.23E-21  | 2.86E-20  |
| Unigene7941   | Potri.011G044900.1 | 3.2081   | 8.8699   | -1.4672 | Down | 1.01E-16  | 3.97E-16  |
| Unigene4559   | Potri.004G208900.1 | 19.9769  | 55.2358  | -1.4673 | Down | 1.06E-27  | 6.01E-27  |
| Unigene43835  | Potri.003G176600.1 | 11.1514  | 30.8343  | -1.4673 | Down | 1.22E-38  | 9.23E-38  |
| Unigene61056  | Potri.018G150600.2 | 1.8934   | 5.2356   | -1.4674 | Down | 6.43E-07  | 1.50E-06  |
| Unigene10152  | Potri.017G127300.1 | 5.5533   | 15.3561  | -1.4674 | Down | 1.71E-12  | 5.56E-12  |
| Unigene6380   | Potri.006G063600.1 | 2.0684   | 5.7195   | -1.4674 | Down | 6.43E-07  | 1.50E-06  |
| Unigene118178 | Potri.005G151500.3 | 2.7094   | 7.4922   | -1.4674 | Down | 6.43E-07  | 1.50E-06  |
| Unigene81742  | Potri.010G150900.1 | 224.6715 | 621.301  | -1.4675 | Down | 1.39E-281 | 1.12E-279 |
| Unigene32314  | Potri.015G147700.1 | 9.049    | 25.0266  | -1.4676 | Down | 2.08E-61  | 2.53E-60  |
| Unigene32551  | Potri.008G203800.1 | 10.7117  | 29.6237  | -1.4676 | Down | 1.75E-42  | 1.45E-41  |
| Unigene21177  | Potri.005G021400.1 | 19.5651  | 54.1144  | -1.4677 | Down | 7.81E-33  | 5.13E-32  |
| Unigene29547  | Potri.015G070100.2 | 8.1666   | 22.5883  | -1.4678 | Down | 1.37E-20  | 6.22E-20  |
| Unigene47548  | Potri.010G199000.1 | 77.0857  | 213.218  | -1.4678 | Down | 1.38E-97  | 2.86E-96  |
| Unigene61059  | Potri.013G152800.1 | 5.9231   | 16.3845  | -1.4679 | Down | 3.10E-08  | 7.97E-08  |
| Unigene105533 | Potri.013G032400.1 | 2.0506   | 5.6725   | -1.4679 | Down | 3.10E-08  | 7.97E-08  |
| Unigene1350   | Potri.003G080100.1 | 9.8931   | 27.3663  | -1.4679 | Down | 1.21E-28  | 7.06E-28  |
| Unigene88186  | Potri.003G023300.1 | 51.2869  | 141.8734 | -1.4679 | Down | 8.39E-84  | 1.45E-82  |
| Unigene25537  | Potri.001G469800.3 | 5.8978   | 16.3145  | -1.4679 | Down | 3.10E-08  | 7.97E-08  |
| Unigene20771  | Potri.T010000.1    | 39.45    | 109.1312 | -1.468  | Down | 1.60E-98  | 3.36E-97  |
| Unigene21417  | Potri.015G064600.1 | 8.4461   | 23.3648  | -1.468  | Down | 8.40E-92  | 1.61E-90  |
| Unigene32814  | Potri.015G018000.1 | 2.9914   | 8.2758   | -1.4681 | Down | 2.23E-16  | 8.63E-16  |
| Unigene44145  | Potri.013G130000.1 | 26.3807  | 72.986   | -1.4681 | Down | 5.24E-62  | 6.46E-61  |
| Unigene43425  | Potri.004G107000.3 | 11.8106  | 32.6753  | -1.4681 | Down | 1.83E-83  | 3.15E-82  |
| Unigene50310  | Potri.008G206300.1 | 4.5443   | 12.5726  | -1.4682 | Down | 1.89E-24  | 9.75E-24  |
| Unigene98783  | Potri.008G044000.2 | 2.0644   | 5.7119   | -1.4682 | Down | 1.52E-09  | 4.22E-09  |
| Unigene66979  | Potri.003G038800.1 | 4.6271   | 12.8022  | -1.4682 | Down | 1.60E-40  | 1.27E-39  |
| Unigene11505  | Potri.001G145500.1 | 16.38    | 45.3204  | -1.4682 | Down | 1.43E-80  | 2.37E-79  |
| Unigene26054  | Potri.015G034700.1 | 18.7029  | 51.7485  | -1.4683 | Down | 8.95E-34  | 6.01E-33  |
| Unigene53771  | Potri.006G180100.1 | 5.9035   | 16.3343  | -1.4683 | Down | 1.52E-09  | 4.22E-09  |
| Unigene92696  | Potri.006G046500.2 | 3.3088   | 9.1551   | -1.4683 | Down | 1.52E-09  | 4.22E-09  |
| Unigene46151  | Potri.002G063500.1 | 14.771   | 40.8721  | -1.4683 | Down | 5.11E-27  | 2.84E-26  |
| Unigene27006  | Potri.007G112700.1 | 21.314   | 58.9833  | -1.4685 | Down | 6.71E-39  | 5.12E-38  |

|               |                    |         |         |         |      |           |           |
|---------------|--------------------|---------|---------|---------|------|-----------|-----------|
| Unigene27336  | Potri.002G221500.1 | 12.0144 | 33.248  | -1.4685 | Down | 1.38E-29  | 8.30E-29  |
| Unigene48275  | Potri.001G170200.1 | 8.4172  | 23.2932 | -1.4685 | Down | 7.56E-11  | 2.26E-10  |
| Unigene7442   | Potri.006G009800.1 | 13.8567 | 38.3497 | -1.4686 | Down | 8.12E-113 | 2.02E-111 |
| Unigene14845  | Potri.001G049800.1 | 16.5689 | 45.8534 | -1.4686 | Down | 3.51E-40  | 2.77E-39  |
| Unigene31199  | Potri.013G007100.1 | 2.8465  | 7.8784  | -1.4687 | Down | 3.78E-12  | 1.21E-11  |
| Unigene472    | Potri.005G247500.1 | 7.9148  | 21.9058 | -1.4687 | Down | 7.97E-97  | 1.64E-95  |
| Unigene42145  | Potri.001G455600.1 | 15.0938 | 41.7838 | -1.469  | Down | 1.56E-55  | 1.71E-54  |
| Unigene69577  | Potri.017G018300.1 | 2.8804  | 7.9742  | -1.4691 | Down | 4.93E-16  | 1.88E-15  |
| Unigene1103   | Potri.007G082100.1 | 6.4183  | 17.7688 | -1.4691 | Down | 3.07E-46  | 2.77E-45  |
| Unigene22355  | Potri.019G093000.1 | 4.9502  | 13.7051 | -1.4692 | Down | 2.52E-17  | 1.01E-16  |
| Unigene35783  | Potri.007G047500.1 | 10.0839 | 27.9194 | -1.4692 | Down | 1.29E-18  | 5.46E-18  |
| Unigene3192   | Potri.003G053300.1 | 13.1267 | 36.3428 | -1.4692 | Down | 4.45E-50  | 4.35E-49  |
| Unigene54358  | Potri.018G025600.2 | 4.9517  | 13.7108 | -1.4693 | Down | 8.85E-41  | 7.07E-40  |
| Unigene36561  | Potri.018G089700.2 | 12.6552 | 35.0425 | -1.4694 | Down | 1.77E-22  | 8.54E-22  |
| Unigene1747   | Potri.011G082800.2 | 31.6158 | 87.5463 | -1.4694 | Down | 1.07E-66  | 1.43E-65  |
| Unigene33694  | Potri.007G036700.2 | 19.0031 | 52.6215 | -1.4694 | Down | 6.71E-46  | 6.01E-45  |
| Unigene81745  | Potri.004G184500.1 | 32.2    | 89.1609 | -1.4694 | Down | 4.64E-42  | 3.82E-41  |
| Unigene30987  | Potri.001G232800.1 | 10.7107 | 29.6581 | -1.4694 | Down | 1.77E-22  | 8.54E-22  |
| Unigene10460  | Potri.009G156400.4 | 8.8496  | 24.5066 | -1.4695 | Down | 2.46E-26  | 1.34E-25  |
| Unigene26079  | Potri.005G204500.1 | 17.2008 | 47.6381 | -1.4696 | Down | 2.58E-35  | 1.80E-34  |
| Unigene41448  | Potri.005G245400.1 | 7.4237  | 20.5608 | -1.4697 | Down | 3.70E-39  | 2.84E-38  |
| Unigene18758  | Potri.002G114200.1 | 16.7733 | 46.4564 | -1.4697 | Down | 1.02E-41  | 8.30E-41  |
| Unigene24238  | Potri.012G004100.1 | 1.5994  | 4.4308  | -1.47   | Down | 1.45E-06  | 3.29E-06  |
| Unigene31751  | Potri.018G038900.1 | 23.2661 | 64.4555 | -1.4701 | Down | 8.89E-48  | 8.30E-47  |
| Unigene9039   | Potri.015G010400.1 | 7.2864  | 20.1861 | -1.4701 | Down | 3.39E-09  | 9.23E-09  |
| Unigene35314  | Potri.014G117400.1 | 8.8507  | 24.5198 | -1.4701 | Down | 2.14E-14  | 7.59E-14  |
| Unigene98078  | Potri.013G125700.3 | 1.4993  | 4.1537  | -1.4701 | Down | 1.68E-10  | 4.93E-10  |
| Unigene27951  | Potri.012G004700.6 | 1.973   | 5.466   | -1.4701 | Down | 3.10E-05  | 6.26E-05  |
| Unigene104118 | Potri.010G102300.1 | 3.5685  | 9.8861  | -1.4701 | Down | 5.56E-17  | 2.21E-16  |
| Unigene16291  | Potri.009G096600.1 | 4.8531  | 13.4449 | -1.4701 | Down | 6.94E-08  | 1.74E-07  |
| Unigene14518  | Potri.009G003100.1 | 3.1712  | 8.7854  | -1.4701 | Down | 3.10E-05  | 6.26E-05  |
| Unigene12136  | Potri.008G070300.5 | 1.829   | 5.0671  | -1.4701 | Down | 1.45E-06  | 3.29E-06  |
| Unigene46434  | Potri.008G030000.1 | 3.7088  | 10.2746 | -1.4701 | Down | 6.94E-08  | 1.74E-07  |
| Unigene66828  | Potri.007G133800.1 | 2.0084  | 5.5641  | -1.4701 | Down | 3.10E-05  | 6.26E-05  |
| Unigene91184  | Potri.005G155600.1 | 7.6605  | 21.2225 | -1.4701 | Down | 5.56E-17  | 2.20E-16  |
| Unigene8168   | Potri.005G100900.1 | 2.3693  | 6.5638  | -1.4701 | Down | 6.94E-08  | 1.74E-07  |
| Unigene14609  | Potri.005G003800.1 | 3.1457  | 8.7149  | -1.4701 | Down | 1.45E-06  | 3.29E-06  |
| Unigene9192   | Potri.004G167400.1 | 9.6703  | 26.7901 | -1.4701 | Down | 5.56E-17  | 2.20E-16  |
| Unigene109584 | Potri.004G118900.1 | 30.2195 | 83.7192 | -1.4701 | Down | 1.08E-33  | 7.26E-33  |

|               |                    |         |          |         |      |           |           |
|---------------|--------------------|---------|----------|---------|------|-----------|-----------|
| Unigene57403  | Potri.003G094100.1 | 1.8344  | 5.082    | -1.4701 | Down | 3.10E-05  | 6.26E-05  |
| Unigene8850   | Potri.002G149200.1 | 4.0001  | 11.0817  | -1.4701 | Down | 7.62E-30  | 4.61E-29  |
| Unigene8780   | Potri.002G003600.1 | 13.1095 | 36.318   | -1.4701 | Down | 5.56E-17  | 2.21E-16  |
| Unigene18772  | Potri.001G454200.1 | 2.2316  | 6.1823   | -1.4701 | Down | 1.45E-06  | 3.29E-06  |
| Unigene18013  | Potri.001G266200.1 | 5.5722  | 15.437   | -1.4701 | Down | 1.46E-19  | 6.41E-19  |
| Unigene76262  | Potri.001G163100.1 | 12.7647 | 35.363   | -1.4701 | Down | 1.09E-15  | 4.08E-15  |
| Unigene10290  | Potri.001G146100.1 | 3.1363  | 8.6887   | -1.4701 | Down | 1.45E-06  | 3.29E-06  |
| Unigene103927 | Potri.001G135500.2 | 1.6117  | 4.465    | -1.4701 | Down | 3.10E-05  | 6.26E-05  |
| Unigene7817   | Potri.018G047500.1 | 14.8784 | 41.2258  | -1.4703 | Down | 6.93E-120 | 1.87E-118 |
| Unigene14575  | Potri.004G177500.1 | 29.7365 | 82.4074  | -1.4705 | Down | 2.38E-33  | 1.58E-32  |
| Unigene42196  | Potri.006G117400.3 | 30.0771 | 83.355   | -1.4706 | Down | 2.51E-57  | 2.84E-56  |
| Unigene21661  | Potri.013G116100.2 | 9.5147  | 26.373   | -1.4708 | Down | 1.07E-40  | 8.53E-40  |
| Unigene49805  | Potri.015G067300.2 | 4.939   | 13.6907  | -1.4709 | Down | 3.22E-19  | 1.40E-18  |
| Unigene36330  | Potri.018G102400.1 | 24.2311 | 67.1709  | -1.471  | Down | 2.72E-34  | 1.85E-33  |
| Unigene3016   | Potri.018G084900.1 | 8.2363  | 22.8338  | -1.4711 | Down | 3.33E-59  | 3.91E-58  |
| Unigene50693  | Potri.012G089000.4 | 15.6283 | 43.3282  | -1.4711 | Down | 6.45E-43  | 5.41E-42  |
| Unigene14395  | Potri.006G170500.1 | 22.4764 | 62.3174  | -1.4712 | Down | 8.23E-53  | 8.51E-52  |
| Unigene45838  | Potri.008G222700.3 | 8.7964  | 24.3903  | -1.4713 | Down | 2.61E-25  | 1.38E-24  |
| Unigene102    | Potri.004G041300.1 | 11.1218 | 30.8385  | -1.4713 | Down | 1.87E-82  | 3.17E-81  |
| Unigene191    | Potri.001G278200.1 | 24.5333 | 68.0218  | -1.4713 | Down | 2.43E-163 | 9.77E-162 |
| Unigene42912  | Potri.006G160500.1 | 5.3567  | 14.8536  | -1.4714 | Down | 2.05E-46  | 1.85E-45  |
| Unigene3495   | Potri.006G108400.1 | 3.6423  | 10.1008  | -1.4715 | Down | 1.86E-11  | 5.75E-11  |
| Unigene95716  | Potri.T003900.1    | 5.6578  | 15.6903  | -1.4716 | Down | 1.86E-11  | 5.75E-11  |
| Unigene6161   | Potri.019G129100.1 | 3.4255  | 9.4996   | -1.4716 | Down | 1.86E-11  | 5.75E-11  |
| Unigene24760  | Potri.014G073800.3 | 8.9123  | 24.7157  | -1.4716 | Down | 1.88E-21  | 8.80E-21  |
| Unigene97745  | Potri.010G173800.1 | 2.0959  | 5.8124   | -1.4716 | Down | 1.86E-11  | 5.75E-11  |
| Unigene10689  | Potri.006G047100.4 | 11.5003 | 31.8938  | -1.4716 | Down | 6.51E-50  | 6.34E-49  |
| Unigene1746   | Potri.003G048600.1 | 5.1845  | 14.3777  | -1.4716 | Down | 1.88E-21  | 8.80E-21  |
| Unigene27660  | Potri.001G193400.1 | 26.2873 | 72.9074  | -1.4717 | Down | 5.75E-56  | 6.34E-55  |
| Unigene32130  | Potri.005G225900.5 | 1.6476  | 4.5699   | -1.4718 | Down | 3.73E-10  | 1.08E-09  |
| Unigene44541  | Potri.007G076200.5 | 25.8971 | 71.8337  | -1.4719 | Down | 2.17E-75  | 3.32E-74  |
| Unigene42861  | Potri.005G053700.1 | 9.2873  | 25.7639  | -1.472  | Down | 5.16E-47  | 4.73E-46  |
| Unigene53811  | Potri.010G026800.4 | 10.047  | 27.8726  | -1.4721 | Down | 2.71E-16  | 1.04E-15  |
| Unigene82322  | Potri.019G010200.1 | 32.4219 | 89.953   | -1.4722 | Down | 3.56E-43  | 3.00E-42  |
| Unigene82648  | Potri.002G035300.1 | 36.7323 | 101.9146 | -1.4722 | Down | 3.12E-49  | 3.00E-48  |
| Unigene959    | Potri.015G144700.1 | 16.3677 | 45.4132  | -1.4723 | Down | 4.54E-116 | 1.17E-114 |
| Unigene2061   | Potri.011G082800.4 | 25.2585 | 70.0818  | -1.4723 | Down | 1.16E-68  | 1.59E-67  |
| Unigene43390  | Potri.010G227500.2 | 7.4599  | 20.6986  | -1.4723 | Down | 5.94E-48  | 5.56E-47  |
| Unigene18101  | Potri.004G218700.1 | 4.9115  | 13.628   | -1.4723 | Down | 4.15E-21  | 1.92E-20  |

|               |                    |         |          |         |      |           |           |
|---------------|--------------------|---------|----------|---------|------|-----------|-----------|
| Unigene23842  | Potri.001G108700.3 | 3.7944  | 10.5284  | -1.4723 | Down | 4.15E-21  | 1.92E-20  |
| Unigene115102 | Potri.015G074100.2 | 18.3852 | 51.0153  | -1.4724 | Down | 3.40E-27  | 1.90E-26  |
| Unigene46168  | Potri.015G073200.1 | 2.1863  | 6.067    | -1.4725 | Down | 1.56E-07  | 3.80E-07  |
| Unigene8382   | Potri.012G089000.6 | 2.4088  | 6.6844   | -1.4725 | Down | 1.56E-07  | 3.80E-07  |
| Unigene16301  | Potri.002G242200.2 | 6.3612  | 17.6524  | -1.4725 | Down | 1.05E-13  | 3.60E-13  |
| Unigene6997   | Potri.019G039900.1 | 19.7665 | 54.8636  | -1.4728 | Down | 3.29E-34  | 2.24E-33  |
| Unigene9196   | Potri.010G013500.1 | 15.2825 | 42.4177  | -1.4728 | Down | 2.44E-23  | 1.21E-22  |
| Unigene22907  | Potri.015G069700.1 | 46.481  | 129.0343 | -1.473  | Down | 8.84E-106 | 2.02E-104 |
| Unigene36394  | Potri.013G089500.1 | 3.3326  | 9.2523   | -1.4732 | Down | 3.26E-06  | 7.21E-06  |
| Unigene91647  | Potri.009G082400.2 | 11.2504 | 31.2344  | -1.4732 | Down | 1.44E-25  | 7.66E-25  |
| Unigene3189   | Potri.005G221700.1 | 5.2706  | 14.6327  | -1.4732 | Down | 2.32E-30  | 1.42E-29  |
| Unigene27093  | Potri.002G154700.1 | 12.9882 | 36.059   | -1.4732 | Down | 5.97E-16  | 2.27E-15  |
| Unigene42530  | Potri.002G077700.1 | 8.4119  | 23.3545  | -1.4732 | Down | 1.12E-100 | 2.43E-99  |
| Unigene9617   | Potri.001G331400.1 | 10.5988 | 29.4252  | -1.4732 | Down | 9.13E-21  | 4.17E-20  |
| Unigene11581  | Potri.003G126800.1 | 7.0741  | 19.6423  | -1.4733 | Down | 3.75E-42  | 3.09E-41  |
| Unigene90669  | Potri.007G052000.1 | 32.135  | 89.2318  | -1.4734 | Down | 1.80E-63  | 2.28E-62  |
| Unigene65056  | Potri.007G021900.1 | 2.438   | 6.7697   | -1.4734 | Down | 1.77E-19  | 7.74E-19  |
| Unigene8305   | Potri.014G022900.1 | 3.4393  | 9.5505   | -1.4735 | Down | 1.17E-14  | 4.21E-14  |
| Unigene7137   | Potri.010G162500.3 | 15.2626 | 42.3835  | -1.4735 | Down | 4.33E-36  | 3.09E-35  |
| Unigene5596   | Potri.001G398600.1 | 61.4008 | 170.5295 | -1.4737 | Down | 1.19E-119 | 3.20E-118 |
| Unigene74181  | Potri.007G004600.1 | 11.155  | 30.9839  | -1.4738 | Down | 2.31E-13  | 7.85E-13  |
| Unigene15117  | Potri.006G024600.1 | 10.3341 | 28.7037  | -1.4738 | Down | 2.31E-13  | 7.85E-13  |
| Unigene46104  | Potri.001G136800.1 | 5.8366  | 16.2116  | -1.4738 | Down | 2.31E-13  | 7.85E-13  |
| Unigene48355  | Potri.T099700.5    | 22.9416 | 63.7247  | -1.4739 | Down | 9.76E-29  | 5.71E-28  |
| Unigene2177   | Potri.007G133800.1 | 8.1363  | 22.6009  | -1.4739 | Down | 3.03E-32  | 1.96E-31  |
| Unigene42708  | Potri.007G042100.6 | 3.7076  | 10.299   | -1.4739 | Down | 6.73E-17  | 2.66E-16  |
| Unigene49988  | Potri.001G253700.4 | 5.9081  | 16.4115  | -1.4739 | Down | 6.73E-17  | 2.66E-16  |
| Unigene902    | Potri.014G014700.2 | 8.2347  | 22.875   | -1.474  | Down | 2.87E-73  | 4.24E-72  |
| Unigene23379  | Potri.005G080200.3 | 10.4473 | 29.0226  | -1.474  | Down | 6.10E-24  | 3.09E-23  |
| Unigene7965   | Potri.003G079400.1 | 2.7312  | 7.587    | -1.474  | Down | 2.01E-20  | 9.08E-20  |
| Unigene28743  | Potri.014G128300.1 | 11.4867 | 31.9118  | -1.4741 | Down | 1.82E-34  | 1.24E-33  |
| Unigene38651  | Potri.T113400.1    | 52.9133 | 147.0103 | -1.4742 | Down | 1.83E-147 | 6.41E-146 |
| Unigene43808  | Potri.009G123800.1 | 8.3789  | 23.2796  | -1.4742 | Down | 2.44E-104 | 5.48E-103 |
| Unigene47684  | Potri.T057400.1    | 8.7493  | 24.3096  | -1.4743 | Down | 4.59E-12  | 1.46E-11  |
| Unigene10168  | Potri.T033700.1    | 7.4599  | 20.7271  | -1.4743 | Down | 4.59E-12  | 1.46E-11  |
| Unigene97442  | Potri.018G037900.1 | 2.0076  | 5.5781   | -1.4743 | Down | 7.07E-05  | 1.38E-04  |
| Unigene105950 | Potri.017G130300.1 | 1.2094  | 3.3602   | -1.4743 | Down | 1.69E-08  | 4.41E-08  |
| Unigene90969  | Potri.013G152100.1 | 1.7673  | 4.9104   | -1.4743 | Down | 7.07E-05  | 1.38E-04  |
| Unigene76781  | Potri.010G154000.1 | 12.4332 | 34.5452  | -1.4743 | Down | 1.32E-15  | 4.93E-15  |



|               |                    |          |          |         |      |           |           |
|---------------|--------------------|----------|----------|---------|------|-----------|-----------|
| Unigene58624  | Potri.009G024600.4 | 3.3116   | 9.2013   | -1.4743 | Down | 7.07E-05  | 1.38E-04  |
| Unigene8447   | Potri.008G130600.1 | 2.6248   | 7.2929   | -1.4743 | Down | 1.69E-08  | 4.41E-08  |
| Unigene35129  | Potri.007G014100.1 | 11.2491  | 31.2552  | -1.4743 | Down | 3.90E-19  | 1.68E-18  |
| Unigene8164   | Potri.018G006200.1 | 16.5138  | 45.8867  | -1.4744 | Down | 2.08E-49  | 2.01E-48  |
| Unigene44850  | Potri.014G052600.1 | 14.7932  | 41.1154  | -1.4747 | Down | 4.56E-49  | 4.36E-48  |
| Unigene80020  | Potri.012G073900.1 | 132.9082 | 369.3758 | -1.4747 | Down | 2.90E-162 | 1.16E-160 |
| Unigene26582  | Potri.012G038900.1 | 9.712    | 26.9923  | -1.4747 | Down | 2.59E-14  | 9.16E-14  |
| Unigene16631  | Potri.006G190500.2 | 11.3879  | 31.6503  | -1.4747 | Down | 2.59E-14  | 9.16E-14  |
| Unigene53396  | Potri.016G061700.1 | 12.6833  | 35.253   | -1.4748 | Down | 7.62E-33  | 5.00E-32  |
| Unigene46204  | Potri.015G048800.2 | 21.8118  | 60.6254  | -1.4748 | Down | 7.62E-33  | 5.00E-32  |
| Unigene10663  | Potri.006G015300.1 | 15.3745  | 42.7316  | -1.4748 | Down | 2.13E-127 | 6.17E-126 |
| Unigene109851 | Potri.011G064000.1 | 8.5549   | 23.7793  | -1.4749 | Down | 9.18E-11  | 2.74E-10  |
| Unigene24451  | Potri.002G149400.2 | 2.6379   | 7.3322   | -1.4749 | Down | 9.18E-11  | 2.74E-10  |
| Unigene16850  | Potri.010G240000.2 | 7.9091   | 21.9861  | -1.475  | Down | 1.49E-16  | 5.79E-16  |
| Unigene108679 | Potri.001G387600.1 | 34.4441  | 95.7523  | -1.4751 | Down | 2.74E-37  | 2.01E-36  |
| Unigene12849  | Potri.018G128700.1 | 2.8835   | 8.017    | -1.4752 | Down | 3.49E-07  | 8.31E-07  |
| Unigene18435  | Potri.016G140500.1 | 2.9956   | 8.3285   | -1.4752 | Down | 5.12E-13  | 1.71E-12  |
| Unigene79573  | Potri.016G055000.2 | 123.7178 | 343.9721 | -1.4752 | Down | 4.15E-150 | 1.49E-148 |
| Unigene63985  | Potri.013G085300.1 | 4.4992   | 12.509   | -1.4752 | Down | 3.49E-07  | 8.31E-07  |
| Unigene30168  | Potri.016G091100.1 | 4.197    | 11.669   | -1.4753 | Down | 5.12E-13  | 1.71E-12  |
| Unigene117781 | Potri.006G142000.1 | 3.019    | 8.3938   | -1.4753 | Down | 3.49E-07  | 8.31E-07  |
| Unigene90531  | Potri.003G101600.1 | 130.3062 | 362.2931 | -1.4753 | Down | 3.82E-249 | 2.62E-247 |
| Unigene7571   | Potri.015G008100.2 | 13.2621  | 36.8758  | -1.4754 | Down | 6.96E-52  | 7.07E-51  |
| Unigene34558  | Potri.006G263300.1 | 10.9551  | 30.4621  | -1.4754 | Down | 1.89E-40  | 1.50E-39  |
| Unigene46237  | Potri.010G185800.3 | 9.8734   | 27.4569  | -1.4755 | Down | 2.95E-23  | 1.46E-22  |
| Unigene119295 | Potri.007G049000.6 | 4.132    | 11.4901  | -1.4755 | Down | 2.91E-15  | 1.07E-14  |
| Unigene7136   | Potri.014G076800.1 | 20.3037  | 56.4682  | -1.4757 | Down | 2.13E-67  | 2.88E-66  |
| Unigene53674  | Potri.008G062900.1 | 6.6551   | 18.5085  | -1.4757 | Down | 1.85E-09  | 5.12E-09  |
| Unigene24710  | Potri.006G197200.1 | 10.4829  | 29.154   | -1.4757 | Down | 1.68E-17  | 6.79E-17  |
| Unigene61227  | Potri.005G182800.1 | 3.0434   | 8.4641   | -1.4757 | Down | 1.68E-17  | 6.79E-17  |
| Unigene27805  | Potri.009G120900.1 | 21.1639  | 58.8628  | -1.4758 | Down | 9.24E-54  | 9.74E-53  |
| Unigene4871   | Potri.009G031300.1 | 22.4678  | 62.4927  | -1.4758 | Down | 6.14E-30  | 3.72E-29  |
| Unigene21625  | Potri.014G197600.1 | 11.0264  | 30.6711  | -1.4759 | Down | 4.11E-85  | 7.23E-84  |
| Unigene10586  | Potri.010G063100.1 | 31.5821  | 87.8501  | -1.4759 | Down | 1.51E-44  | 1.31E-43  |
| Unigene39972  | Potri.006G025400.5 | 9.5196   | 26.4793  | -1.4759 | Down | 5.70E-22  | 2.71E-21  |
| Unigene118539 | Potri.004G185200.1 | 4.5286   | 12.5967  | -1.4759 | Down | 1.02E-11  | 3.18E-11  |
| Unigene30705  | Potri.002G086900.1 | 11.6231  | 32.3303  | -1.4759 | Down | 5.70E-22  | 2.71E-21  |
| Unigene64787  | Potri.011G053800.1 | 2.5579   | 7.1157   | -1.476  | Down | 5.73E-14  | 2.00E-13  |
| Unigene94506  | Potri.017G091100.1 | 8.5127   | 23.6814  | -1.4761 | Down | 3.94E-78  | 6.28E-77  |

|               |                    |         |          |         |      |          |          |
|---------------|--------------------|---------|----------|---------|------|----------|----------|
| Unigene44557  | Potri.014G058800.1 | 10.6155 | 29.5318  | -1.4761 | Down | 1.18E-28 | 6.89E-28 |
| Unigene13328  | Potri.008G000600.2 | 2.8581  | 7.9513   | -1.4761 | Down | 3.28E-16 | 1.26E-15 |
| Unigene27761  | Potri.008G165800.2 | 6.49    | 18.0564  | -1.4762 | Down | 1.90E-18 | 7.96E-18 |
| Unigene46845  | Potri.004G163300.1 | 23.1035 | 64.2763  | -1.4762 | Down | 1.05E-47 | 9.76E-47 |
| Unigene85651  | Potri.001G000900.5 | 40.504  | 112.6843 | -1.4762 | Down | 4.53E-60 | 5.39E-59 |
| Unigene43102  | Potri.015G001200.6 | 9.5176  | 26.4813  | -1.4763 | Down | 5.22E-61 | 6.32E-60 |
| Unigene26450  | Potri.005G007200.1 | 5.5039  | 15.3147  | -1.4764 | Down | 2.27E-27 | 1.28E-26 |
| Unigene50473  | Potri.002G027100.1 | 15.5538 | 43.2825  | -1.4765 | Down | 1.04E-40 | 8.32E-40 |
| Unigene117169 | Potri.016G116400.2 | 2.5724  | 7.1594   | -1.4767 | Down | 7.37E-06 | 1.58E-05 |
| Unigene447    | Potri.016G036100.1 | 4.9356  | 13.7366  | -1.4767 | Down | 3.31E-37 | 2.43E-36 |
| Unigene114187 | Potri.015G094100.1 | 15.1442 | 42.1491  | -1.4767 | Down | 1.25E-21 | 5.90E-21 |
| Unigene8536   | Potri.015G040300.3 | 5.1448  | 14.3189  | -1.4767 | Down | 1.13E-12 | 3.72E-12 |
| Unigene63243  | Potri.013G074800.1 | 8.7032  | 24.2227  | -1.4767 | Down | 3.70E-17 | 1.48E-16 |
| Unigene15074  | Potri.012G061400.1 | 9.8157  | 27.3189  | -1.4767 | Down | 1.13E-12 | 3.72E-12 |
| Unigene39810  | Potri.010G142700.1 | 3.8256  | 10.6474  | -1.4767 | Down | 1.13E-12 | 3.72E-12 |
| Unigene28592  | Potri.010G108000.2 | 29.1691 | 81.1831  | -1.4767 | Down | 4.88E-66 | 6.46E-65 |
| Unigene15151  | Potri.008G112000.6 | 4.6335  | 12.8959  | -1.4767 | Down | 1.13E-12 | 3.72E-12 |
| Unigene22483  | Potri.008G041900.1 | 21.6896 | 60.3663  | -1.4767 | Down | 6.74E-75 | 1.02E-73 |
| Unigene9458   | Potri.006G204200.1 | 8.9519  | 24.9148  | -1.4767 | Down | 6.43E-15 | 2.34E-14 |
| Unigene83731  | Potri.006G039900.3 | 16.4557 | 45.7993  | -1.4767 | Down | 7.38E-24 | 3.73E-23 |
| Unigene30115  | Potri.006G025500.1 | 6.4869  | 18.0542  | -1.4767 | Down | 3.70E-17 | 1.48E-16 |
| Unigene34527  | Potri.004G230800.1 | 8.4452  | 23.5046  | -1.4767 | Down | 1.99E-39 | 1.54E-38 |
| Unigene68651  | Potri.001G403400.1 | 2.7376  | 7.6192   | -1.4767 | Down | 7.37E-06 | 1.58E-05 |
| Unigene64456  | Potri.001G337600.1 | 2.2324  | 6.2132   | -1.4767 | Down | 7.37E-06 | 1.58E-05 |
| Unigene42478  | Potri.T037200.1    | 4.9311  | 13.7243  | -1.4768 | Down | 1.54E-30 | 9.50E-30 |
| Unigene38302  | Potri.014G018700.4 | 2.8753  | 8.0026   | -1.4768 | Down | 3.78E-08 | 9.64E-08 |
| Unigene4133   | Potri.006G136400.8 | 3.6991  | 10.2954  | -1.4768 | Down | 7.37E-06 | 1.58E-05 |
| Unigene20512  | Potri.002G254500.4 | 5.3104  | 14.78    | -1.4768 | Down | 3.70E-17 | 1.48E-16 |
| Unigene25660  | Potri.002G233800.2 | 1.3646  | 3.798    | -1.4768 | Down | 7.37E-06 | 1.58E-05 |
| Unigene101984 | Potri.001G469300.3 | 1.6954  | 4.7187   | -1.4768 | Down | 7.37E-06 | 1.58E-05 |
| Unigene23242  | Potri.002G213100.1 | 19.7758 | 55.0461  | -1.4769 | Down | 1.12E-53 | 1.17E-52 |
| Unigene33605  | Potri.006G230400.4 | 5.8377  | 16.2522  | -1.4772 | Down | 1.43E-22 | 6.90E-22 |
| Unigene15761  | Potri.015G110900.2 | 10.7086 | 29.8148  | -1.4773 | Down | 4.18E-18 | 1.73E-17 |
| Unigene111481 | Potri.006G138500.1 | 14.2475 | 39.6678  | -1.4773 | Down | 4.18E-18 | 1.73E-17 |
| Unigene28976  | Potri.013G001300.1 | 12.5808 | 35.0308  | -1.4774 | Down | 1.60E-80 | 2.65E-79 |
| Unigene112041 | Potri.016G001700.3 | 10.1442 | 28.2473  | -1.4775 | Down | 1.27E-13 | 4.35E-13 |
| Unigene38604  | Potri.008G083500.2 | 6.3302  | 17.6269  | -1.4775 | Down | 1.27E-13 | 4.35E-13 |
| Unigene16028  | Potri.016G016700.1 | 36.6088 | 101.9514 | -1.4776 | Down | 5.75E-41 | 4.62E-40 |
| Unigene97572  | Potri.015G073100.1 | 8.7861  | 24.4683  | -1.4776 | Down | 2.26E-11 | 6.95E-11 |

|               |                    |         |          |         |      |           |           |
|---------------|--------------------|---------|----------|---------|------|-----------|-----------|
| Unigene22076  | Potri.007G051000.1 | 8.19    | 22.8115  | -1.4778 | Down | 1.68E-49  | 1.62E-48  |
| Unigene2071   | Potri.010G184100.3 | 2.4866  | 6.9262   | -1.4779 | Down | 4.12E-09  | 1.12E-08  |
| Unigene44925  | Potri.008G094400.1 | 8.9084  | 24.8134  | -1.4779 | Down | 2.77E-47  | 2.56E-46  |
| Unigene48182  | Potri.018G069600.1 | 20.7013 | 57.6658  | -1.478  | Down | 3.14E-22  | 1.50E-21  |
| Unigene43558  | Potri.005G184500.1 | 12.378  | 34.4801  | -1.478  | Down | 5.53E-71  | 7.88E-70  |
| Unigene34255  | Potri.018G003900.1 | 4.3856  | 12.2178  | -1.4781 | Down | 5.36E-20  | 2.38E-19  |
| Unigene3501   | Potri.011G056100.1 | 13.8822 | 38.6745  | -1.4781 | Down | 5.36E-20  | 2.38E-19  |
| Unigene1409   | Potri.011G119700.1 | 73.8379 | 205.71   | -1.4782 | Down | 5.76E-217 | 3.29E-215 |
| Unigene9631   | Potri.015G146700.1 | 5.5757  | 15.5355  | -1.4783 | Down | 2.51E-12  | 8.10E-12  |
| Unigene30673  | Potri.014G039800.5 | 26.5509 | 73.9753  | -1.4783 | Down | 4.63E-63  | 5.81E-62  |
| Unigene40307  | Potri.008G085800.1 | 3.2193  | 8.9699   | -1.4783 | Down | 7.84E-07  | 1.82E-06  |
| Unigene20767  | Potri.006G184200.1 | 3.1721  | 8.8384   | -1.4783 | Down | 7.84E-07  | 1.82E-06  |
| Unigene34226  | Potri.006G049300.1 | 36.3898 | 101.3887 | -1.4783 | Down | 1.98E-68  | 2.72E-67  |
| Unigene45815  | Potri.006G031900.1 | 4.4514  | 12.4028  | -1.4783 | Down | 7.84E-07  | 1.82E-06  |
| Unigene79091  | Potri.005G044700.1 | 9.0141  | 25.1158  | -1.4783 | Down | 2.51E-12  | 8.10E-12  |
| Unigene20791  | Potri.T034500.1    | 1.3939  | 3.8839   | -1.4784 | Down | 7.84E-07  | 1.82E-06  |
| Unigene50564  | Potri.014G177900.1 | 1.3111  | 3.6532   | -1.4784 | Down | 7.84E-07  | 1.82E-06  |
| Unigene32168  | Potri.011G152600.2 | 3.5936  | 10.0129  | -1.4784 | Down | 9.21E-18  | 3.77E-17  |
| Unigene114232 | Potri.012G115100.2 | 18.6498 | 51.9688  | -1.4785 | Down | 2.40E-26  | 1.31E-25  |
| Unigene33997  | Potri.004G164500.1 | 4.1629  | 11.6011  | -1.4786 | Down | 1.60E-15  | 5.95E-15  |
| Unigene19848  | Potri.018G103700.3 | 7.4925  | 20.8823  | -1.4788 | Down | 4.53E-10  | 1.30E-09  |
| Unigene70480  | Potri.008G187600.1 | 25.7367 | 71.7306  | -1.4788 | Down | 2.74E-27  | 1.54E-26  |
| Unigene34123  | Potri.007G076500.5 | 18.832  | 52.4895  | -1.4788 | Down | 1.86E-30  | 1.15E-29  |
| Unigene36770  | Potri.004G141400.3 | 33.1314 | 92.3454  | -1.4788 | Down | 3.16E-59  | 3.71E-58  |
| Unigene117265 | Potri.002G166200.1 | 4.8606  | 13.5469  | -1.4788 | Down | 4.53E-10  | 1.30E-09  |
| Unigene38540  | Potri.010G160500.1 | 37.7535 | 105.2314 | -1.4789 | Down | 3.09E-94  | 6.13E-93  |
| Unigene45018  | Potri.007G046900.1 | 1.9012  | 5.2995   | -1.4789 | Down | 2.81E-13  | 9.48E-13  |
| Unigene48792  | Potri.005G057800.1 | 6.6381  | 18.5034  | -1.4789 | Down | 2.81E-13  | 9.48E-13  |
| Unigene18057  | Potri.001G182300.2 | 3.4255  | 9.5484   | -1.4789 | Down | 2.81E-13  | 9.48E-13  |
| Unigene106940 | Potri.018G141100.3 | 6.2037  | 17.2938  | -1.4791 | Down | 1.80E-16  | 6.99E-16  |
| Unigene31570  | Potri.009G066400.2 | 14.078  | 39.247   | -1.4791 | Down | 1.18E-19  | 5.18E-19  |
| Unigene18375  | Potri.008G178600.1 | 3.2654  | 9.1033   | -1.4791 | Down | 1.18E-19  | 5.18E-19  |
| Unigene52817  | Potri.005G137600.3 | 12.2696 | 34.2103  | -1.4793 | Down | 3.85E-48  | 3.63E-47  |
| Unigene63830  | Potri.002G110500.1 | 5.7203  | 15.9494  | -1.4793 | Down | 2.69E-51  | 2.70E-50  |
| Unigene115086 | Potri.008G002100.2 | 2.2486  | 6.27     | -1.4794 | Down | 1.62E-04  | 3.03E-04  |
| Unigene117518 | Potri.016G054800.1 | 1.7325  | 4.831    | -1.4795 | Down | 1.62E-04  | 3.03E-04  |
| Unigene39910  | Potri.013G048000.2 | 9.4843  | 26.4467  | -1.4795 | Down | 8.93E-24  | 4.49E-23  |
| Unigene23882  | Potri.010G231800.1 | 8.8163  | 24.5839  | -1.4795 | Down | 9.18E-43  | 7.67E-42  |
| Unigene115786 | Potri.010G151400.1 | 2.1207  | 5.9135   | -1.4795 | Down | 1.62E-04  | 3.03E-04  |

|               |                    |         |         |         |      |           |           |
|---------------|--------------------|---------|---------|---------|------|-----------|-----------|
| Unigene105644 | Potri.009G120700.2 | 1.9571  | 5.4573  | -1.4795 | Down | 8.45E-08  | 2.10E-07  |
| Unigene20013  | Potri.008G048100.1 | 3.2106  | 8.9527  | -1.4795 | Down | 8.45E-08  | 2.10E-07  |
| Unigene15721  | Potri.006G134200.6 | 12.8099 | 35.7202 | -1.4795 | Down | 2.80E-33  | 1.86E-32  |
| Unigene103827 | Potri.004G203100.5 | 2.6531  | 7.3981  | -1.4795 | Down | 1.62E-04  | 3.03E-04  |
| Unigene36961  | Potri.004G133700.4 | 3.294   | 9.1852  | -1.4795 | Down | 8.45E-08  | 2.10E-07  |
| Unigene37736  | Potri.003G023000.1 | 9.9857  | 27.8449 | -1.4795 | Down | 3.14E-14  | 1.11E-13  |
| Unigene47383  | Potri.001G148300.1 | 1.1183  | 3.1184  | -1.4795 | Down | 1.62E-04  | 3.03E-04  |
| Unigene72130  | Potri.001G059900.3 | 3.0781  | 8.5832  | -1.4795 | Down | 1.62E-04  | 3.03E-04  |
| Unigene4191   | Potri.001G056000.1 | 5.9261  | 16.5248 | -1.4795 | Down | 5.01E-11  | 1.52E-10  |
| Unigene11498  | Potri.003G127100.1 | 11.2426 | 31.3533 | -1.4796 | Down | 2.21E-37  | 1.63E-36  |
| Unigene16184  | Potri.016G100500.1 | 19.1245 | 53.3367 | -1.4797 | Down | 6.88E-28  | 3.93E-27  |
| Unigene12481  | Potri.008G042400.1 | 9.6516  | 26.9165 | -1.4797 | Down | 2.21E-37  | 1.63E-36  |
| Unigene7585   | Potri.016G129000.1 | 2.8304  | 7.895   | -1.4799 | Down | 3.53E-15  | 1.29E-14  |
| Unigene10652  | Potri.007G017100.1 | 12.8093 | 35.7281 | -1.4799 | Down | 3.19E-109 | 7.63E-108 |
| Unigene17615  | Potri.002G061600.7 | 2.7835  | 7.7638  | -1.4799 | Down | 2.29E-18  | 9.61E-18  |
| Unigene43974  | Potri.006G059300.2 | 10.7164 | 29.8928 | -1.48   | Down | 1.16E-25  | 6.19E-25  |
| Unigene23285  | Potri.001G213400.3 | 14.2822 | 39.8417 | -1.4801 | Down | 2.31E-43  | 1.96E-42  |
| Unigene47293  | Potri.019G003100.1 | 6.6424  | 18.5329 | -1.4803 | Down | 9.20E-09  | 2.44E-08  |
| Unigene68256  | Potri.012G073600.3 | 5.1041  | 14.2411 | -1.4803 | Down | 9.20E-09  | 2.44E-08  |
| Unigene13969  | Potri.010G098200.1 | 10.9787 | 30.6317 | -1.4803 | Down | 3.97E-16  | 1.52E-15  |
| Unigene100091 | Potri.008G039400.1 | 1.7236  | 4.8089  | -1.4803 | Down | 9.20E-09  | 2.44E-08  |
| Unigene17581  | Potri.004G135800.1 | 16.6249 | 46.3852 | -1.4803 | Down | 1.03E-30  | 6.36E-30  |
| Unigene45271  | Potri.003G109900.1 | 9.446   | 26.3552 | -1.4803 | Down | 3.97E-16  | 1.52E-15  |
| Unigene20654  | Potri.002G177100.1 | 5.0863  | 14.1913 | -1.4803 | Down | 9.20E-09  | 2.44E-08  |
| Unigene11500  | Potri.014G075100.2 | 15.3958 | 42.9584 | -1.4804 | Down | 1.11E-60  | 1.34E-59  |
| Unigene42552  | Potri.011G076800.1 | 19.8947 | 55.5133 | -1.4804 | Down | 1.50E-157 | 5.73E-156 |
| Unigene43484  | Potri.003G066700.1 | 14.7866 | 41.2616 | -1.4805 | Down | 2.78E-84  | 4.84E-83  |
| Unigene33230  | Potri.016G129000.1 | 7.2503  | 20.2338 | -1.4807 | Down | 4.48E-17  | 1.78E-16  |
| Unigene43715  | Potri.011G119400.1 | 5.4313  | 15.1576 | -1.4807 | Down | 4.48E-17  | 1.78E-16  |
| Unigene22908  | Potri.008G134600.1 | 28.5772 | 79.7522 | -1.4807 | Down | 4.65E-48  | 4.37E-47  |
| Unigene40504  | Potri.008G042300.5 | 6.9318  | 19.3458 | -1.4807 | Down | 3.34E-21  | 1.55E-20  |
| Unigene34165  | Potri.005G243500.1 | 6.7448  | 18.8231 | -1.4807 | Down | 4.48E-17  | 1.78E-16  |
| Unigene33953  | Potri.011G032200.1 | 14.3113 | 39.9424 | -1.4808 | Down | 2.55E-25  | 1.35E-24  |
| Unigene37506  | Potri.005G053200.1 | 19.8203 | 55.3177 | -1.4808 | Down | 2.55E-25  | 1.35E-24  |
| Unigene21378  | Potri.013G081300.6 | 7.5318  | 21.0232 | -1.4809 | Down | 4.23E-103 | 9.39E-102 |
| Unigene10592  | Potri.012G073300.2 | 1.7572  | 4.9048  | -1.4809 | Down | 1.67E-05  | 3.45E-05  |
| Unigene31712  | Potri.015G138500.1 | 8.7607  | 24.4543 | -1.481  | Down | 6.95E-14  | 2.41E-13  |
| Unigene37249  | Potri.009G115500.2 | 1.9538  | 5.4537  | -1.481  | Down | 1.67E-05  | 3.45E-05  |
| Unigene30495  | Potri.001G295800.1 | 1.7647  | 4.9259  | -1.481  | Down | 1.67E-05  | 3.45E-05  |

|               |                     |         |          |         |      |           |           |
|---------------|---------------------|---------|----------|---------|------|-----------|-----------|
| Unigene31205  | Potri.001G185100.1  | 3.9642  | 11.0655  | -1.481  | Down | 1.01E-09  | 2.83E-09  |
| Unigene80069  | Potri.018G000600.3  | 75.6605 | 211.2174 | -1.4811 | Down | 1.38E-94  | 2.74E-93  |
| Unigene10887  | Potri.015G079800.1  | 12.6402 | 35.2875  | -1.4811 | Down | 8.78E-108 | 2.06E-106 |
| Unigene24538  | Potri.014G121400.1  | 3.7176  | 10.3782  | -1.4811 | Down | 2.03E-35  | 1.42E-34  |
| Unigene35070  | Potri.014G036000.1  | 47.0676 | 131.3912 | -1.4811 | Down | 1.92E-243 | 1.28E-241 |
| Unigene11952  | Potri.010G099100.2  | 21.7581 | 60.7451  | -1.4812 | Down | 8.75E-58  | 9.99E-57  |
| Unigene27049  | Potri.002G231000.1  | 16.1866 | 45.1894  | -1.4812 | Down | 4.32E-23  | 2.13E-22  |
| Unigene6792   | Potri.011G049700.1  | 19.3304 | 53.9714  | -1.4813 | Down | 2.11E-41  | 1.71E-40  |
| Unigene25408  | Potri.006G108300.2  | 9.7363  | 27.1841  | -1.4813 | Down | 7.79E-15  | 2.82E-14  |
| Unigene34240  | Potri.001G244300.1  | 3.7207  | 10.3887  | -1.4814 | Down | 4.91E-24  | 2.49E-23  |
| Unigene17408  | Potri.019G045000.1  | 3.8804  | 10.8355  | -1.4815 | Down | 1.11E-10  | 3.30E-10  |
| Unigene109875 | Potri.014G055900.1  | 8.3838  | 23.4106  | -1.4815 | Down | 1.11E-10  | 3.30E-10  |
| Unigene74875  | Potri.002G254700.11 | 25.1515 | 70.2319  | -1.4815 | Down | 4.33E-29  | 2.56E-28  |
| Unigene20884  | Potri.013G064300.4  | 11.5705 | 32.3122  | -1.4816 | Down | 8.76E-16  | 3.30E-15  |
| Unigene49290  | Potri.012G055800.4  | 9.5447  | 26.6548  | -1.4816 | Down | 8.76E-16  | 3.30E-15  |
| Unigene54257  | Potri.001G347100.1  | 64.1621 | 179.1744 | -1.4816 | Down | 1.36E-71  | 1.96E-70  |
| Unigene93261  | Potri.018G075900.1  | 22.663  | 63.2935  | -1.4817 | Down | 2.38E-64  | 3.05E-63  |
| Unigene21789  | Potri.009G026200.5  | 17.5158 | 48.9189  | -1.4817 | Down | 2.23E-69  | 3.10E-68  |
| Unigene34190  | Potri.014G141800.4  | 21.5675 | 60.2353  | -1.4818 | Down | 1.29E-103 | 2.88E-102 |
| Unigene53402  | Potri.014G078500.1  | 18.8468 | 52.637   | -1.4818 | Down | 3.15E-55  | 3.42E-54  |
| Unigene24303  | Potri.010G129300.3  | 9.0187  | 25.1907  | -1.4819 | Down | 9.87E-17  | 3.87E-16  |
| Unigene12464  | Potri.002G136100.1  | 1.1834  | 3.3055   | -1.4819 | Down | 1.76E-06  | 3.99E-06  |
| Unigene34757  | Potri.001G370900.1  | 10.7769 | 30.1041  | -1.482  | Down | 7.41E-33  | 4.87E-32  |
| Unigene103691 | Potri.015G076100.3  | 11.3348 | 31.6654  | -1.4821 | Down | 1.11E-17  | 4.54E-17  |
| Unigene49229  | Potri.015G037600.3  | 7.8635  | 21.9669  | -1.4821 | Down | 9.49E-23  | 4.62E-22  |
| Unigene33205  | Potri.006G045500.1  | 26.6164 | 74.3525  | -1.4821 | Down | 4.09E-164 | 1.65E-162 |
| Unigene11800  | Potri.001G130500.1  | 3.7499  | 10.4753  | -1.4821 | Down | 9.49E-23  | 4.62E-22  |
| Unigene47048  | Potri.018G036600.1  | 5.5997  | 15.6446  | -1.4822 | Down | 1.37E-12  | 4.49E-12  |
| Unigene746    | Potri.001G373500.2  | 8.2572  | 23.0681  | -1.4822 | Down | 9.49E-29  | 5.56E-28  |
| Unigene743    | Potri.001G368600.1  | 7.0651  | 19.7381  | -1.4822 | Down | 8.83E-40  | 6.89E-39  |
| Unigene22619  | Potri.013G040600.1  | 9.8098  | 27.4071  | -1.4823 | Down | 9.73E-35  | 6.70E-34  |
| Unigene70572  | Potri.015G065400.4  | 65.6472 | 183.4455 | -1.4825 | Down | 2.02E-67  | 2.72E-66  |
| Unigene38136  | Potri.005G182100.1  | 6.282   | 17.5546  | -1.4826 | Down | 1.54E-13  | 5.25E-13  |
| Unigene28228  | Potri.015G103800.1  | 10.046  | 28.0761  | -1.4827 | Down | 1.62E-20  | 7.32E-20  |
| Unigene15526  | Potri.010G142200.1  | 15.1295 | 42.2832  | -1.4827 | Down | 1.62E-20  | 7.32E-20  |
| Unigene21573  | Potri.014G054400.3  | 7.3259  | 20.476   | -1.4829 | Down | 2.13E-34  | 1.46E-33  |
| Unigene87161  | Potri.006G165400.2  | 21.519  | 60.149   | -1.4829 | Down | 2.45E-35  | 1.71E-34  |
| Unigene35690  | Potri.005G046700.4  | 9.3412  | 26.1098  | -1.4829 | Down | 2.08E-28  | 1.21E-27  |
| Unigene18029  | Potri.017G009800.1  | 3.1224  | 8.728    | -1.483  | Down | 1.93E-15  | 7.18E-15  |

|              |                    |         |          |         |      |           |           |
|--------------|--------------------|---------|----------|---------|------|-----------|-----------|
| Unigene10591 | Potri.015G011100.1 | 4.5547  | 12.7319  | -1.483  | Down | 2.05E-08  | 5.33E-08  |
| Unigene18    | Potri.011G049700.2 | 8.0229  | 22.4262  | -1.483  | Down | 1.71E-97  | 3.55E-96  |
| Unigene37713 | Potri.004G206900.1 | 5.9486  | 16.6284  | -1.483  | Down | 2.05E-08  | 5.33E-08  |
| Unigene62762 | Potri.004G115800.2 | 2.3156  | 6.4728   | -1.483  | Down | 2.05E-08  | 5.33E-08  |
| Unigene910   | Potri.001G117800.1 | 4.3812  | 12.2469  | -1.483  | Down | 3.37E-43  | 2.85E-42  |
| Unigene76382 | Potri.006G263300.1 | 50.5029 | 141.1817 | -1.4831 | Down | 6.72E-59  | 7.83E-58  |
| Unigene45098 | Potri.010G196100.1 | 30.6147 | 85.5893  | -1.4832 | Down | 1.04E-119 | 2.78E-118 |
| Unigene45348 | Potri.010G027800.1 | 51.2525 | 143.2819 | -1.4832 | Down | 8.87E-176 | 3.91E-174 |
| Unigene11076 | Potri.010G046000.4 | 6.1537  | 17.2048  | -1.4833 | Down | 3.57E-32  | 2.30E-31  |
| Unigene42663 | Potri.011G156900.1 | 8.8909  | 24.8592  | -1.4834 | Down | 5.59E-41  | 4.49E-40  |
| Unigene31805 | Potri.005G140100.1 | 1.4559  | 4.0708   | -1.4834 | Down | 2.25E-09  | 6.18E-09  |
| Unigene11677 | Potri.013G035600.5 | 24.8664 | 69.5326  | -1.4835 | Down | 5.91E-84  | 1.02E-82  |
| Unigene23887 | Potri.011G083100.1 | 38.7484 | 108.348  | -1.4835 | Down | 2.30E-196 | 1.17E-194 |
| Unigene47811 | Potri.007G092200.1 | 6.4711  | 18.0951  | -1.4835 | Down | 2.78E-18  | 1.16E-17  |
| Unigene2512  | Potri.006G048000.1 | 7.4799  | 20.9164  | -1.4835 | Down | 8.49E-44  | 7.25E-43  |
| Unigene43252 | Potri.004G048700.2 | 7.8431  | 21.9309  | -1.4835 | Down | 3.51E-26  | 1.90E-25  |
| Unigene43371 | Potri.015G083700.2 | 10.075  | 28.1735  | -1.4836 | Down | 1.37E-52  | 1.42E-51  |
| Unigene37324 | Potri.010G060500.1 | 17.7756 | 49.7083  | -1.4836 | Down | 6.15E-36  | 4.37E-35  |
| Unigene13729 | Potri.005G100800.2 | 4.8343  | 13.5185  | -1.4836 | Down | 8.49E-44  | 7.25E-43  |
| Unigene17221 | Potri.002G241900.1 | 28.6333 | 80.0716  | -1.4836 | Down | 6.26E-79  | 1.01E-77  |
| Unigene37526 | Potri.012G097500.2 | 8.7654  | 24.513   | -1.4837 | Down | 2.47E-10  | 7.19E-10  |
| Unigene10795 | Potri.016G085900.2 | 10.925  | 30.555   | -1.4838 | Down | 8.88E-76  | 1.37E-74  |
| Unigene13397 | Potri.001G123400.5 | 4.7934  | 13.4065  | -1.4838 | Down | 5.98E-30  | 3.62E-29  |
| Unigene53665 | Potri.010G031900.1 | 25.1265 | 70.2821  | -1.4839 | Down | 7.82E-32  | 5.00E-31  |
| Unigene31879 | Potri.018G015300.2 | 7.7014  | 21.543   | -1.484  | Down | 1.68E-74  | 2.53E-73  |
| Unigene12204 | Potri.009G167600.2 | 8.5465  | 23.9072  | -1.484  | Down | 3.99E-54  | 4.23E-53  |
| Unigene10654 | Potri.004G141700.4 | 4.6151  | 12.9097  | -1.484  | Down | 3.99E-54  | 4.23E-53  |
| Unigene14588 | Potri.003G137400.3 | 16.1978 | 45.3084  | -1.484  | Down | 4.59E-22  | 2.18E-21  |
| Unigene12584 | Potri.016G029200.3 | 8.1615  | 22.8308  | -1.4841 | Down | 2.14E-44  | 1.85E-43  |
| Unigene46484 | Potri.012G123400.1 | 4.6727  | 13.0712  | -1.4841 | Down | 3.05E-12  | 9.78E-12  |
| Unigene16948 | Potri.007G023700.3 | 4.9329  | 13.7991  | -1.4841 | Down | 3.05E-12  | 9.78E-12  |
| Unigene54078 | Potri.018G139600.1 | 5.6404  | 15.78    | -1.4842 | Down | 3.40E-13  | 1.14E-12  |
| Unigene23771 | Potri.016G144200.1 | 7.4056  | 20.7176  | -1.4842 | Down | 7.04E-58  | 8.04E-57  |
| Unigene231   | Potri.013G098700.1 | 9.1905  | 25.7121  | -1.4842 | Down | 1.61E-94  | 3.21E-93  |
| Unigene73224 | Potri.012G091900.1 | 55.0612 | 154.0433 | -1.4842 | Down | 9.35E-60  | 1.11E-58  |
| Unigene25697 | Potri.008G119000.1 | 9.9252  | 27.7675  | -1.4842 | Down | 3.40E-13  | 1.14E-12  |
| Unigene41672 | Potri.007G126400.1 | 6.0067  | 16.8047  | -1.4842 | Down | 3.40E-13  | 1.14E-12  |
| Unigene11522 | Potri.003G165800.1 | 8.0372  | 22.4846  | -1.4842 | Down | 1.35E-35  | 9.49E-35  |
| Unigene33103 | Potri.005G108100.1 | 12.8484 | 35.9477  | -1.4843 | Down | 2.04E-38  | 1.54E-37  |

|               |                    |         |          |         |      |           |           |
|---------------|--------------------|---------|----------|---------|------|-----------|-----------|
| Unigene53409  | Potri.012G017500.1 | 12.1314 | 33.9428  | -1.4844 | Down | 3.80E-14  | 1.34E-13  |
| Unigene8118   | Potri.018G146700.2 | 10.2539 | 28.6931  | -1.4845 | Down | 1.31E-29  | 7.87E-29  |
| Unigene107629 | Potri.006G208300.2 | 13.2949 | 37.2012  | -1.4845 | Down | 4.27E-15  | 1.56E-14  |
| Unigene26340  | Potri.003G085900.1 | 7.565   | 21.168   | -1.4845 | Down | 4.27E-15  | 1.56E-14  |
| Unigene48272  | Potri.013G092600.1 | 8.4972  | 23.7782  | -1.4846 | Down | 4.80E-16  | 1.83E-15  |
| Unigene2792   | Potri.019G079100.1 | 12.8908 | 36.0763  | -1.4847 | Down | 2.25E-33  | 1.50E-32  |
| Unigene10123  | Potri.016G036900.1 | 9.9953  | 27.9721  | -1.4847 | Down | 5.42E-17  | 2.15E-16  |
| Unigene79924  | Potri.003G023300.1 | 40.4967 | 113.3387 | -1.4848 | Down | 1.44E-51  | 1.45E-50  |
| Unigene26050  | Potri.010G156500.1 | 15.2182 | 42.5963  | -1.4849 | Down | 8.89E-21  | 4.06E-20  |
| Unigene41904  | Potri.017G119100.1 | 15.004  | 41.9981  | -1.485  | Down | 1.01E-21  | 4.76E-21  |
| Unigene22071  | Potri.012G079000.1 | 28.2643 | 79.1224  | -1.4851 | Down | 5.59E-116 | 1.44E-114 |
| Unigene95821  | Potri.009G120900.2 | 4.1786  | 11.6976  | -1.4851 | Down | 1.49E-24  | 7.67E-24  |
| Unigene41879  | Potri.004G201900.1 | 10.5412 | 29.508   | -1.4851 | Down | 1.31E-23  | 6.53E-23  |
| Unigene39559  | Potri.012G053600.1 | 5.7198  | 16.0133  | -1.4852 | Down | 2.52E-28  | 1.46E-27  |
| Unigene1174   | Potri.002G179800.1 | 7.1575  | 20.0383  | -1.4852 | Down | 2.52E-28  | 1.46E-27  |
| Unigene21726  | Potri.018G106100.1 | 42.4552 | 118.8606 | -1.4853 | Down | 0         | 0         |
| Unigene81185  | Potri.010G094700.1 | 94.7969 | 265.413  | -1.4853 | Down | 3.40E-122 | 9.37E-121 |
| Unigene34296  | Potri.004G172300.1 | 55.1241 | 154.3396 | -1.4854 | Down | 7.09E-127 | 2.04E-125 |
| Unigene76079  | Potri.T134200.1    | 42.7946 | 119.838  | -1.4856 | Down | 5.99E-50  | 5.84E-49  |
| Unigene58146  | Potri.009G021000.3 | 36.1635 | 101.279  | -1.4857 | Down | 2.12E-73  | 3.14E-72  |
| Unigene39665  | Potri.019G036600.3 | 2.6719  | 7.4844   | -1.486  | Down | 3.98E-06  | 8.70E-06  |
| Unigene105813 | Potri.018G115400.1 | 2.8803  | 8.0681   | -1.486  | Down | 5.01E-09  | 1.35E-08  |
| Unigene105503 | Potri.018G014000.3 | 2.3312  | 6.5301   | -1.486  | Down | 4.59E-08  | 1.16E-07  |
| Unigene2891   | Potri.015G075200.1 | 2.5478  | 7.1367   | -1.486  | Down | 3.98E-06  | 8.70E-06  |
| Unigene50674  | Potri.015G033300.1 | 3.2906  | 9.2175   | -1.486  | Down | 1.87E-36  | 1.34E-35  |
| Unigene43821  | Potri.014G163200.2 | 2.5724  | 7.2056   | -1.486  | Down | 6.08E-11  | 1.83E-10  |
| Unigene28233  | Potri.014G157700.2 | 2.422   | 6.7845   | -1.486  | Down | 3.79E-05  | 7.59E-05  |
| Unigene89071  | Potri.014G052100.1 | 55.8956 | 156.5718 | -1.486  | Down | 2.68E-99  | 5.71E-98  |
| Unigene36740  | Potri.013G024000.1 | 3.1919  | 8.941    | -1.486  | Down | 4.59E-08  | 1.16E-07  |
| Unigene44374  | Potri.012G131500.1 | 1.3738  | 3.8483   | -1.486  | Down | 3.79E-05  | 7.59E-05  |
| Unigene1893   | Potri.012G023200.6 | 3.5561  | 9.9612   | -1.486  | Down | 5.50E-10  | 1.57E-09  |
| Unigene33882  | Potri.010G245100.3 | 1.1512  | 3.2247   | -1.486  | Down | 3.72E-04  | 6.71E-04  |
| Unigene45551  | Potri.010G189300.4 | 1.5456  | 4.3293   | -1.486  | Down | 3.72E-04  | 6.71E-04  |
| Unigene52120  | Potri.010G146900.1 | 7.173   | 20.0926  | -1.486  | Down | 9.43E-15  | 3.40E-14  |
| Unigene56544  | Potri.010G087700.2 | 1.5381  | 4.3085   | -1.486  | Down | 3.79E-05  | 7.59E-05  |
| Unigene103968 | Potri.009G164900.1 | 1.2577  | 3.523    | -1.486  | Down | 4.59E-08  | 1.16E-07  |
| Unigene47168  | Potri.009G097000.2 | 9.6882  | 27.1381  | -1.486  | Down | 1.19E-16  | 4.67E-16  |
| Unigene66836  | Potri.009G093200.1 | 5.0019  | 14.0109  | -1.486  | Down | 4.59E-08  | 1.16E-07  |
| Unigene20763  | Potri.009G031900.3 | 12.0808 | 33.8402  | -1.486  | Down | 1.19E-16  | 4.67E-16  |

|               |                    |         |          |         |      |           |           |
|---------------|--------------------|---------|----------|---------|------|-----------|-----------|
| Unigene5732   | Potri.008G221900.1 | 3.2434  | 9.0854   | -1.486  | Down | 4.25E-07  | 1.01E-06  |
| Unigene29377  | Potri.008G189500.3 | 7.5172  | 21.0567  | -1.486  | Down | 2.22E-21  | 1.03E-20  |
| Unigene39141  | Potri.008G125800.1 | 21.5528 | 60.3726  | -1.486  | Down | 9.89E-48  | 9.22E-47  |
| Unigene110572 | Potri.008G080300.1 | 13.2621 | 37.149   | -1.486  | Down | 1.19E-16  | 4.67E-16  |
| Unigene105478 | Potri.007G062800.1 | 2.1034  | 5.8918   | -1.486  | Down | 5.50E-10  | 1.57E-09  |
| Unigene87808  | Potri.007G045900.4 | 1.7376  | 4.8672   | -1.486  | Down | 3.72E-04  | 6.71E-04  |
| Unigene13530  | Potri.006G076400.2 | 2.2883  | 6.4099   | -1.486  | Down | 4.25E-07  | 1.01E-06  |
| Unigene114431 | Potri.005G237500.1 | 11.0517 | 30.9575  | -1.486  | Down | 1.19E-16  | 4.67E-16  |
| Unigene8788   | Potri.005G234500.2 | 3.7207  | 10.4221  | -1.486  | Down | 5.01E-09  | 1.35E-08  |
| Unigene61901  | Potri.005G144600.1 | 2.6317  | 7.3717   | -1.486  | Down | 1.06E-15  | 3.98E-15  |
| Unigene1605   | Potri.005G042200.1 | 1.6197  | 4.537    | -1.486  | Down | 4.59E-08  | 1.16E-07  |
| Unigene11362  | Potri.004G223100.1 | 4.3676  | 12.2344  | -1.486  | Down | 7.22E-30  | 4.37E-29  |
| Unigene41675  | Potri.004G209500.1 | 1.7512  | 4.9052   | -1.486  | Down | 4.25E-07  | 1.01E-06  |
| Unigene105369 | Potri.004G161700.3 | 4.1139  | 11.5237  | -1.486  | Down | 4.25E-07  | 1.01E-06  |
| Unigene6781   | Potri.003G105200.2 | 1.8526  | 5.1895   | -1.486  | Down | 4.25E-07  | 1.01E-06  |
| Unigene94722  | Potri.002G187500.2 | 2.7835  | 7.7971   | -1.486  | Down | 3.79E-05  | 7.59E-05  |
| Unigene35716  | Potri.002G139500.1 | 2.7266  | 7.6375   | -1.486  | Down | 3.98E-06  | 8.70E-06  |
| Unigene6119   | Potri.001G471300.3 | 3.2294  | 9.046    | -1.486  | Down | 3.79E-05  | 7.59E-05  |
| Unigene39104  | Potri.001G109200.1 | 17.3097 | 48.4869  | -1.486  | Down | 8.26E-31  | 5.13E-30  |
| Unigene29421  | Potri.001G091800.1 | 15.9053 | 44.5532  | -1.486  | Down | 1.31E-49  | 1.27E-48  |
| Unigene33631  | Potri.001G004200.2 | 3.0202  | 8.46     | -1.486  | Down | 7.52E-13  | 2.49E-12  |
| Unigene2162   | Potri.001G000700.2 | 15.9476 | 44.6714  | -1.486  | Down | 1.63E-35  | 1.14E-34  |
| Unigene14636  | Potri.010G133900.1 | 1.3321  | 3.7315   | -1.4861 | Down | 3.79E-05  | 7.59E-05  |
| Unigene22155  | Potri.006G191900.1 | 20.0138 | 56.0671  | -1.4862 | Down | 7.72E-145 | 2.63E-143 |
| Unigene41282  | Potri.018G103100.1 | 20.1305 | 56.4036  | -1.4864 | Down | 6.38E-109 | 1.51E-107 |
| Unigene10673  | Potri.006G085700.5 | 8.8206  | 24.7141  | -1.4864 | Down | 2.75E-118 | 7.29E-117 |
| Unigene32208  | Potri.017G056700.1 | 7.7522  | 21.7242  | -1.4866 | Down | 1.66E-70  | 2.35E-69  |
| Unigene17349  | Potri.010G147600.1 | 8.7722  | 24.5875  | -1.4869 | Down | 8.17E-25  | 4.25E-24  |
| Unigene24433  | Potri.001G253400.1 | 14.421  | 40.4188  | -1.4869 | Down | 1.06E-26  | 5.86E-26  |
| Unigene36473  | Potri.016G016000.1 | 14.2438 | 39.9251  | -1.487  | Down | 7.18E-24  | 3.62E-23  |
| Unigene11496  | Potri.005G082200.1 | 11.9583 | 33.5213  | -1.4871 | Down | 1.00E-61  | 1.22E-60  |
| Unigene71858  | Potri.017G050500.1 | 64.9558 | 182.1076 | -1.4873 | Down | 6.87E-69  | 9.49E-68  |
| Unigene20931  | Potri.012G021800.2 | 12.9882 | 36.4178  | -1.4874 | Down | 2.63E-16  | 1.02E-15  |
| Unigene9619   | Potri.001G189100.2 | 13.6173 | 38.1805  | -1.4874 | Down | 5.20E-32  | 3.34E-31  |
| Unigene42607  | Potri.015G079800.1 | 27.7056 | 77.687   | -1.4875 | Down | 4.65E-171 | 1.98E-169 |
| Unigene50161  | Potri.005G113000.1 | 8.6841  | 24.352   | -1.4876 | Down | 1.57E-121 | 4.31E-120 |
| Unigene24826  | Potri.014G140500.3 | 90.4614 | 253.6959 | -1.4877 | Down | 7.97E-258 | 5.74E-256 |
| Unigene7974   | Potri.003G106200.4 | 6.1851  | 17.3458  | -1.4877 | Down | 2.33E-26  | 1.27E-25  |
| Unigene27723  | Potri.017G088300.1 | 19.1707 | 53.7674  | -1.4878 | Down | 2.25E-36  | 1.62E-35  |



|               |                    |         |          |         |      |           |           |
|---------------|--------------------|---------|----------|---------|------|-----------|-----------|
| Unigene8872   | Potri.014G100100.4 | 2.3808  | 6.6772   | -1.4878 | Down | 1.86E-13  | 6.33E-13  |
| Unigene53064  | Potri.010G119500.1 | 11.1899 | 31.3827  | -1.4878 | Down | 1.86E-13  | 6.33E-13  |
| Unigene863    | Potri.019G024200.1 | 5.8889  | 16.5171  | -1.4879 | Down | 1.35E-124 | 3.80E-123 |
| Unigene4288   | Potri.015G079300.1 | 6.4195  | 18.0058  | -1.4879 | Down | 1.67E-12  | 5.42E-12  |
| Unigene9599   | Potri.010G089500.1 | 6.6978  | 18.7863  | -1.4879 | Down | 1.67E-12  | 5.42E-12  |
| Unigene24554  | Potri.001G342600.1 | 7.9041  | 22.1687  | -1.4879 | Down | 1.80E-24  | 9.25E-24  |
| Unigene1139   | Potri.001G383800.4 | 10.4684 | 29.3642  | -1.488  | Down | 1.49E-43  | 1.27E-42  |
| Unigene36832  | Potri.011G148100.2 | 47.9373 | 134.4826 | -1.4882 | Down | 9.48E-136 | 2.98E-134 |
| Unigene1550   | Potri.005G107600.2 | 21.8236 | 61.2222  | -1.4882 | Down | 9.57E-70  | 1.34E-68  |
| Unigene76300  | Potri.T052100.3    | 15.9145 | 44.6502  | -1.4883 | Down | 9.47E-20  | 4.18E-19  |
| Unigene109298 | Potri.012G038900.5 | 16.8111 | 47.1657  | -1.4883 | Down | 9.47E-20  | 4.18E-19  |
| Unigene28757  | Potri.T021000.1    | 16.0653 | 45.0767  | -1.4884 | Down | 4.32E-45  | 3.80E-44  |
| Unigene37380  | Potri.018G125300.1 | 21.1786 | 59.4264  | -1.4885 | Down | 5.85E-27  | 3.25E-26  |
| Unigene15854  | Potri.010G034800.3 | 13.153  | 36.9069  | -1.4885 | Down | 5.85E-27  | 3.25E-26  |
| Unigene34628  | Potri.004G091800.3 | 8.8527  | 24.8402  | -1.4885 | Down | 3.76E-44  | 3.23E-43  |
| Unigene85556  | Potri.014G165500.4 | 11.0612 | 31.0396  | -1.4886 | Down | 7.40E-18  | 3.04E-17  |
| Unigene77647  | Potri.006G265100.1 | 27.6531 | 77.599   | -1.4886 | Down | 3.76E-34  | 2.55E-33  |
| Unigene24409  | Potri.006G035000.2 | 6.8105  | 19.1114  | -1.4886 | Down | 3.76E-34  | 2.55E-33  |
| Unigene82469  | Potri.005G044900.5 | 6.1451  | 17.2442  | -1.4886 | Down | 1.22E-09  | 3.42E-09  |
| Unigene213    | Potri.T078200.1    | 6.6871  | 18.766   | -1.4887 | Down | 1.02E-64  | 1.32E-63  |
| Unigene62776  | Potri.018G062700.2 | 9.4414  | 26.4971  | -1.4888 | Down | 6.55E-17  | 2.59E-16  |
| Unigene27638  | Potri.012G057300.1 | 5.7384  | 16.1066  | -1.4889 | Down | 5.81E-16  | 2.21E-15  |
| Unigene9241   | Potri.008G213000.1 | 2.8519  | 8.0047   | -1.4889 | Down | 1.12E-08  | 2.94E-08  |
| Unigene52653  | Potri.006G190900.3 | 5.4725  | 15.3604  | -1.4889 | Down | 1.12E-08  | 2.94E-08  |
| Unigene80686  | Potri.006G177900.2 | 49.5338 | 139.0408 | -1.489  | Down | 2.23E-64  | 2.87E-63  |
| Unigene33165  | Potri.002G230700.1 | 11.0407 | 30.9908  | -1.489  | Down | 1.24E-36  | 8.98E-36  |
| Unigene27794  | Potri.014G029700.5 | 11.5831 | 32.5145  | -1.4891 | Down | 3.05E-22  | 1.46E-21  |
| Unigene29021  | Potri.006G002100.1 | 5.3285  | 14.9575  | -1.4891 | Down | 3.05E-22  | 1.46E-21  |
| Unigene27240  | Potri.004G055400.1 | 30.0433 | 84.3478  | -1.4893 | Down | 2.74E-46  | 2.47E-45  |
| Unigene23384  | Potri.016G007600.1 | 3.4771  | 9.7625   | -1.4894 | Down | 4.61E-14  | 1.61E-13  |
| Unigene49258  | Potri.009G069800.4 | 3.14    | 8.8161   | -1.4894 | Down | 1.03E-07  | 2.54E-07  |
| Unigene3667   | Potri.006G099600.1 | 5.6463  | 15.8529  | -1.4894 | Down | 1.03E-07  | 2.54E-07  |
| Unigene44150  | Potri.004G075700.4 | 18.6003 | 52.2301  | -1.4896 | Down | 3.12E-37  | 2.29E-36  |
| Unigene23284  | Potri.016G070700.1 | 9.5968  | 26.951   | -1.4897 | Down | 4.80E-30  | 2.91E-29  |
| Unigene23777  | Potri.011G169600.1 | 3.0402  | 8.5385   | -1.4898 | Down | 4.20E-29  | 2.48E-28  |
| Unigene26069  | Potri.009G036700.2 | 29.9923 | 84.2479  | -1.49   | Down | 1.02E-53  | 1.07E-52  |
| Unigene10417  | Potri.001G315600.2 | 2.6307  | 7.3892   | -1.49   | Down | 9.54E-07  | 2.20E-06  |
| Unigene13510  | Potri.019G001100.2 | 10.0018 | 28.0999  | -1.4903 | Down | 5.96E-36  | 4.24E-35  |
| Unigene5714   | Potri.002G231100.2 | 20.773  | 58.3613  | -1.4903 | Down | 5.96E-36  | 4.24E-35  |

|               |                    |         |          |         |      |           |           |
|---------------|--------------------|---------|----------|---------|------|-----------|-----------|
| Unigene18050  | Potri.T036000.1    | 3.3432  | 9.393    | -1.4904 | Down | 3.32E-11  | 1.01E-10  |
| Unigene3119   | Potri.014G140900.1 | 16.9679 | 47.6746  | -1.4904 | Down | 1.14E-44  | 9.94E-44  |
| Unigene20213  | Potri.013G016900.4 | 10.4092 | 29.2456  | -1.4904 | Down | 2.60E-40  | 2.05E-39  |
| Unigene83085  | Potri.012G142200.1 | 17.528  | 49.2495  | -1.4904 | Down | 2.47E-25  | 1.31E-24  |
| Unigene41018  | Potri.004G066100.1 | 3.7373  | 10.5003  | -1.4904 | Down | 3.32E-11  | 1.01E-10  |
| Unigene8157   | Potri.002G188300.1 | 11.1542 | 31.3406  | -1.4904 | Down | 5.04E-49  | 4.82E-48  |
| Unigene5566   | Potri.002G118300.3 | 6.3621  | 17.875   | -1.4904 | Down | 3.32E-11  | 1.01E-10  |
| Unigene84217  | Potri.012G091900.1 | 43.1107 | 121.138  | -1.4905 | Down | 4.43E-62  | 5.46E-61  |
| Unigene11421  | Potri.009G023100.1 | 12.1483 | 34.1344  | -1.4905 | Down | 2.26E-39  | 1.75E-38  |
| Unigene2163   | Potri.006G160500.3 | 42.2192 | 118.6283 | -1.4905 | Down | 5.63E-91  | 1.07E-89  |
| Unigene1410   | Potri.007G017600.1 | 20.9689 | 58.9244  | -1.4906 | Down | 8.64E-43  | 7.22E-42  |
| Unigene44194  | Potri.006G011700.3 | 7.2361  | 20.3337  | -1.4906 | Down | 5.20E-20  | 2.31E-19  |
| Unigene11553  | Potri.005G089700.1 | 3.3603  | 9.4429   | -1.4906 | Down | 2.17E-24  | 1.11E-23  |
| Unigene33428  | Potri.003G117300.1 | 11.7988 | 33.1557  | -1.4906 | Down | 8.64E-43  | 7.22E-42  |
| Unigene4685   | Potri.019G058400.2 | 7.09    | 19.9265  | -1.4908 | Down | 3.00E-10  | 8.68E-10  |
| Unigene103257 | Potri.003G093300.2 | 2.0899  | 5.8736   | -1.4908 | Down | 3.00E-10  | 8.68E-10  |
| Unigene20624  | Potri.002G181300.2 | 2.7409  | 7.7032   | -1.4908 | Down | 8.99E-06  | 1.90E-05  |
| Unigene96635  | Potri.002G168200.1 | 1.9722  | 5.5428   | -1.4908 | Down | 8.99E-06  | 1.90E-05  |
| Unigene42543  | Potri.002G004800.1 | 16.8114 | 47.2486  | -1.4908 | Down | 3.21E-145 | 1.10E-143 |
| Unigene16854  | Potri.012G005000.1 | 5.7576  | 16.182   | -1.4909 | Down | 3.00E-10  | 8.68E-10  |
| Unigene9516   | Potri.010G184300.2 | 17.2251 | 48.4176  | -1.491  | Down | 7.06E-27  | 3.91E-26  |
| Unigene91724  | Potri.018G132000.1 | 31.7388 | 89.2185  | -1.4911 | Down | 5.65E-72  | 8.19E-71  |
| Unigene41362  | Potri.004G215500.1 | 17.2152 | 48.3928  | -1.4911 | Down | 1.14E-34  | 7.83E-34  |
| Unigene24714  | Potri.004G002800.1 | 9.587   | 26.9515  | -1.4912 | Down | 1.02E-13  | 3.51E-13  |
| Unigene41068  | Potri.003G115500.3 | 6.6495  | 18.6934  | -1.4912 | Down | 6.19E-26  | 3.33E-25  |
| Unigene11024  | Potri.010G087700.4 | 11.5021 | 32.337   | -1.4913 | Down | 2.88E-81  | 4.81E-80  |
| Unigene110742 | Potri.013G011000.2 | 6.7667  | 19.0257  | -1.4914 | Down | 2.73E-09  | 7.47E-09  |
| Unigene65162  | Potri.008G017800.4 | 8.789   | 24.7116  | -1.4914 | Down | 5.43E-25  | 2.84E-24  |
| Unigene60550  | Potri.006G080100.3 | 4.1     | 11.5277  | -1.4914 | Down | 2.73E-09  | 7.47E-09  |
| Unigene3677   | Potri.015G125200.1 | 1.3321  | 3.7455   | -1.4915 | Down | 2.73E-09  | 7.47E-09  |
| Unigene90927  | Potri.018G000600.1 | 57.7722 | 162.453  | -1.4916 | Down | 9.49E-119 | 2.52E-117 |
| Unigene34358  | Potri.007G016600.1 | 4.3768  | 12.3076  | -1.4916 | Down | 7.58E-32  | 4.85E-31  |
| Unigene13152  | Potri.018G097300.1 | 5.2592  | 14.7898  | -1.4917 | Down | 1.09E-38  | 8.26E-38  |
| Unigene27243  | Potri.011G046200.8 | 8.4225  | 23.6869  | -1.4918 | Down | 3.19E-16  | 1.22E-15  |
| Unigene30505  | Potri.010G041200.1 | 7.1444  | 20.0926  | -1.4918 | Down | 3.19E-16  | 1.22E-15  |
| Unigene17822  | Potri.016G043900.1 | 1.8547  | 5.2174   | -1.4921 | Down | 8.65E-05  | 1.67E-04  |
| Unigene118954 | Potri.019G116100.1 | 1.2644  | 3.5569   | -1.4922 | Down | 8.65E-05  | 1.67E-04  |
| Unigene39162  | Potri.013G075500.1 | 4.8418  | 13.6205  | -1.4922 | Down | 8.17E-12  | 2.57E-11  |
| Unigene50876  | Potri.012G074700.1 | 5.9946  | 16.8634  | -1.4922 | Down | 2.83E-15  | 1.04E-14  |

|               |                    |         |          |         |      |           |           |
|---------------|--------------------|---------|----------|---------|------|-----------|-----------|
| Unigene31081  | Potri.010G041800.2 | 7.3577  | 20.6981  | -1.4922 | Down | 2.83E-15  | 1.04E-14  |
| Unigene100337 | Potri.009G167000.1 | 2.1728  | 6.1123   | -1.4922 | Down | 2.49E-08  | 6.43E-08  |
| Unigene27924  | Potri.001G341400.1 | 19.6137 | 55.1756  | -1.4922 | Down | 3.99E-46  | 3.59E-45  |
| Unigene33544  | Potri.015G059000.3 | 17.6875 | 49.7625  | -1.4923 | Down | 5.79E-75  | 8.80E-74  |
| Unigene41671  | Potri.019G089000.1 | 30.3129 | 85.2873  | -1.4924 | Down | 9.13E-104 | 2.04E-102 |
| Unigene63373  | Potri.018G020400.1 | 12.2568 | 34.4852  | -1.4924 | Down | 4.43E-28  | 2.55E-27  |
| Unigene70598  | Potri.006G032100.1 | 24.9907 | 70.3241  | -1.4926 | Down | 3.88E-27  | 2.17E-26  |
| Unigene49185  | Potri.002G031900.1 | 7.0199  | 19.754   | -1.4926 | Down | 2.52E-14  | 8.91E-14  |
| Unigene34930  | Potri.001G308900.1 | 5.9868  | 16.8495  | -1.4928 | Down | 1.58E-35  | 1.11E-34  |
| Unigene60637  | Potri.006G167200.1 | 10.343  | 29.1116  | -1.4929 | Down | 4.17E-32  | 2.69E-31  |
| Unigene40800  | Potri.012G120300.1 | 33.1359 | 93.2671  | -1.493  | Down | 5.21E-38  | 3.90E-37  |
| Unigene1177   | Potri.005G011200.1 | 16.4097 | 46.1905  | -1.493  | Down | 1.41E-61  | 1.72E-60  |
| Unigene11486  | Potri.013G154600.5 | 10.3006 | 28.9958  | -1.4931 | Down | 1.84E-93  | 3.60E-92  |
| Unigene38788  | Potri.012G107400.1 | 24.0808 | 67.7849  | -1.4931 | Down | 2.20E-46  | 1.99E-45  |
| Unigene114565 | Potri.006G156100.1 | 4.2511  | 11.9669  | -1.4931 | Down | 2.30E-07  | 5.55E-07  |
| Unigene37072  | Potri.002G141300.3 | 10.7561 | 30.2791  | -1.4932 | Down | 2.25E-13  | 7.64E-13  |
| Unigene66951  | Potri.001G119700.1 | 1.7054  | 4.8009   | -1.4932 | Down | 2.30E-07  | 5.55E-07  |
| Unigene7640   | Potri.001G092900.1 | 6.3013  | 17.7384  | -1.4932 | Down | 2.98E-25  | 1.57E-24  |
| Unigene9276   | Potri.008G051100.1 | 13.9709 | 39.3332  | -1.4933 | Down | 8.09E-22  | 3.82E-21  |
| Unigene5579   | Potri.019G039700.1 | 20.6287 | 58.0812  | -1.4934 | Down | 4.00E-67  | 5.39E-66  |
| Unigene72325  | Potri.009G115800.3 | 27.1599 | 76.4689  | -1.4934 | Down | 3.19E-30  | 1.95E-29  |
| Unigene105050 | Potri.005G171800.1 | 4.2775  | 12.0433  | -1.4934 | Down | 7.03E-16  | 2.66E-15  |
| Unigene43829  | Potri.004G041800.2 | 11.0028 | 30.9786  | -1.4934 | Down | 9.18E-59  | 1.07E-57  |
| Unigene8187   | Potri.012G044700.1 | 3.607   | 10.1567  | -1.4936 | Down | 6.67E-10  | 1.89E-09  |
| Unigene18319  | Potri.005G067300.1 | 7.5526  | 21.2676  | -1.4936 | Down | 2.06E-54  | 2.20E-53  |
| Unigene71480  | Potri.003G012400.1 | 18.5579 | 52.2606  | -1.4937 | Down | 7.13E-21  | 3.27E-20  |
| Unigene10644  | Potri.001G455600.1 | 4.5675  | 12.8629  | -1.4937 | Down | 2.56E-94  | 5.09E-93  |
| Unigene38275  | Potri.017G139300.2 | 5.6999  | 16.0525  | -1.4938 | Down | 2.02E-12  | 6.53E-12  |
| Unigene37676  | Potri.006G253100.1 | 37.2995 | 105.0455 | -1.4938 | Down | 5.99E-56  | 6.60E-55  |
| Unigene27054  | Potri.006G096700.1 | 8.5326  | 24.0323  | -1.4939 | Down | 6.25E-15  | 2.27E-14  |
| Unigene7745   | Potri.004G159300.1 | 8.0394  | 22.6426  | -1.4939 | Down | 3.30E-39  | 2.54E-38  |
| Unigene91373  | Potri.019G065300.1 | 8.5664  | 24.1304  | -1.4941 | Down | 6.28E-20  | 2.79E-19  |
| Unigene49678  | Potri.012G106000.1 | 7.9928  | 22.5145  | -1.4941 | Down | 6.28E-20  | 2.79E-19  |
| Unigene57389  | Potri.016G110000.3 | 6.9604  | 19.6074  | -1.4942 | Down | 1.91E-66  | 2.55E-65  |
| Unigene10659  | Potri.006G101300.3 | 5.0713  | 14.2875  | -1.4943 | Down | 8.29E-40  | 6.47E-39  |
| Unigene3171   | Potri.014G140900.1 | 11.8267 | 33.3243  | -1.4945 | Down | 2.01E-31  | 1.27E-30  |
| Unigene17329  | Potri.014G066400.1 | 2.0991  | 5.9147   | -1.4945 | Down | 6.07E-09  | 1.63E-08  |
| Unigene102647 | Potri.012G044000.1 | 3.8947  | 10.9743  | -1.4945 | Down | 2.15E-06  | 4.80E-06  |
| Unigene70106  | Potri.011G058500.1 | 5.9254  | 16.6961  | -1.4945 | Down | 1.75E-16  | 6.79E-16  |

|               |                    |         |          |         |      |           |           |
|---------------|--------------------|---------|----------|---------|------|-----------|-----------|
| Unigene113698 | Potri.010G248900.2 | 15.0355 | 42.3658  | -1.4945 | Down | 1.78E-21  | 8.32E-21  |
| Unigene45402  | Potri.006G247500.3 | 1.8093  | 5.0981   | -1.4945 | Down | 2.15E-06  | 4.80E-06  |
| Unigene76444  | Potri.003G220400.3 | 10.7277 | 30.2278  | -1.4945 | Down | 5.57E-14  | 1.94E-13  |
| Unigene33546  | Potri.003G188400.1 | 12.3468 | 34.79    | -1.4945 | Down | 6.11E-29  | 3.60E-28  |
| Unigene1222   | Potri.007G050800.1 | 21.4014 | 60.3078  | -1.4946 | Down | 4.64E-75  | 7.06E-74  |
| Unigene42773  | Potri.013G127000.1 | 6.128   | 17.2686  | -1.4947 | Down | 1.22E-67  | 1.65E-66  |
| Unigene3288   | Potri.010G127200.1 | 8.0254  | 22.6157  | -1.4947 | Down | 2.86E-55  | 3.11E-54  |
| Unigene5385   | Potri.017G097100.1 | 19.9725 | 56.2878  | -1.4948 | Down | 1.75E-30  | 1.08E-29  |
| Unigene51368  | Potri.010G040000.4 | 14.1481 | 39.8773  | -1.495  | Down | 1.57E-20  | 7.10E-20  |
| Unigene11123  | Potri.005G250100.1 | 6.2918  | 17.7346  | -1.495  | Down | 4.92E-100 | 1.06E-98  |
| Unigene50511  | Potri.003G183400.7 | 8.7504  | 24.6634  | -1.495  | Down | 1.57E-20  | 7.10E-20  |
| Unigene71981  | Potri.012G024600.3 | 53.1291 | 149.7634 | -1.4951 | Down | 2.10E-57  | 2.38E-56  |
| Unigene50580  | Potri.009G160300.2 | 4.2611  | 12.0115  | -1.4951 | Down | 1.55E-15  | 5.78E-15  |
| Unigene28063  | Potri.004G099100.1 | 7.8924  | 22.2475  | -1.4951 | Down | 1.55E-15  | 5.78E-15  |
| Unigene23106  | Potri.002G160900.4 | 6.3176  | 17.8083  | -1.4951 | Down | 1.53E-29  | 9.19E-29  |
| Unigene30254  | Potri.009G032100.1 | 3.5523  | 10.0144  | -1.4953 | Down | 4.98E-13  | 1.66E-12  |
| Unigene671    | Potri.014G197100.1 | 49.8609 | 140.5792 | -1.4954 | Down | 7.46E-298 | 6.54E-296 |
| Unigene60050  | Potri.011G064700.2 | 7.8262  | 22.066   | -1.4954 | Down | 1.64E-10  | 4.80E-10  |
| Unigene15048  | Potri.007G074000.2 | 54.4721 | 153.5791 | -1.4954 | Down | 3.53E-114 | 8.92E-113 |
| Unigene24083  | Potri.003G038900.1 | 15.3972 | 43.4121  | -1.4954 | Down | 1.73E-64  | 2.23E-63  |
| Unigene76804  | Potri.002G248200.1 | 30.7558 | 86.7154  | -1.4954 | Down | 1.38E-37  | 1.02E-36  |
| Unigene64147  | Potri.002G015100.1 | 6.306   | 17.7798  | -1.4954 | Down | 1.64E-10  | 4.80E-10  |
| Unigene15055  | Potri.001G003900.2 | 3.5062  | 9.8856   | -1.4954 | Down | 1.64E-10  | 4.80E-10  |
| Unigene52156  | Potri.017G032000.3 | 20.2091 | 56.985   | -1.4956 | Down | 1.26E-32  | 8.25E-32  |
| Unigene2883   | Potri.014G165300.5 | 31.9109 | 89.9858  | -1.4956 | Down | 4.84E-74  | 7.24E-73  |
| Unigene47032  | Potri.010G137600.1 | 8.8861  | 25.0567  | -1.4956 | Down | 4.34E-17  | 1.73E-16  |
| Unigene104717 | Potri.010G215000.1 | 3.5227  | 9.9347   | -1.4958 | Down | 5.57E-08  | 1.40E-07  |
| Unigene14522  | Potri.010G166100.6 | 28.5456 | 80.5071  | -1.4958 | Down | 1.10E-44  | 9.61E-44  |
| Unigene103984 | Potri.009G077600.2 | 2.7954  | 7.8835   | -1.4958 | Down | 3.91E-21  | 1.81E-20  |
| Unigene112236 | Potri.008G114200.1 | 36.8352 | 103.8813 | -1.4958 | Down | 3.68E-47  | 3.39E-46  |
| Unigene85554  | Potri.006G134000.8 | 46.4315 | 130.9483 | -1.4958 | Down | 1.25E-70  | 1.77E-69  |
| Unigene37886  | Potri.004G237100.2 | 21.3258 | 60.1447  | -1.4958 | Down | 3.56E-51  | 3.56E-50  |
| Unigene7780   | Potri.004G074100.1 | 6.0349  | 17.0193  | -1.4958 | Down | 3.68E-47  | 3.39E-46  |
| Unigene36979  | Potri.019G020900.6 | 18.8026 | 53.0313  | -1.4959 | Down | 3.60E-25  | 1.89E-24  |
| Unigene36674  | Potri.018G090600.3 | 12.8872 | 36.3473  | -1.4959 | Down | 3.60E-25  | 1.89E-24  |
| Unigene49719  | Potri.017G099600.3 | 17.1902 | 48.4843  | -1.4959 | Down | 3.32E-42  | 2.74E-41  |
| Unigene42790  | Potri.006G131800.3 | 10.823  | 30.5279  | -1.496  | Down | 4.16E-126 | 1.19E-124 |
| Unigene75770  | Potri.007G144800.4 | 88.0404 | 248.3518 | -1.4961 | Down | 9.57E-102 | 2.09E-100 |
| Unigene73983  | Potri.006G176100.1 | 38.5254 | 108.6699 | -1.4961 | Down | 9.60E-44  | 8.19E-43  |

|              |                    |         |          |         |      |           |           |
|--------------|--------------------|---------|----------|---------|------|-----------|-----------|
| Unigene41981 | Potri.002G126700.1 | 3.0169  | 8.5098   | -1.4961 | Down | 4.47E-12  | 1.42E-11  |
| Unigene35545 | Potri.001G092600.1 | 18.7212 | 52.8104  | -1.4961 | Down | 1.03E-26  | 5.68E-26  |
| Unigene10002 | Potri.015G079800.1 | 53.0653 | 149.721  | -1.4964 | Down | 1.95E-133 | 6.02E-132 |
| Unigene12292 | Potri.010G102300.1 | 13.1214 | 37.0242  | -1.4965 | Down | 5.40E-94  | 1.07E-92  |
| Unigene14583 | Potri.005G186500.1 | 7.4246  | 20.9496  | -1.4965 | Down | 1.48E-09  | 4.13E-09  |
| Unigene23834 | Potri.005G086700.1 | 3.5244  | 9.9446   | -1.4965 | Down | 1.08E-17  | 4.41E-17  |
| Unigene76043 | Potri.004G103700.4 | 6.9937  | 19.7338  | -1.4965 | Down | 1.48E-09  | 4.13E-09  |
| Unigene17848 | Potri.003G164100.1 | 1.8174  | 5.128    | -1.4965 | Down | 2.04E-05  | 4.18E-05  |
| Unigene40584 | Potri.001G394100.1 | 1.094   | 3.0869   | -1.4965 | Down | 2.04E-05  | 4.18E-05  |
| Unigene32376 | Potri.014G150100.2 | 2.5267  | 7.1296   | -1.4966 | Down | 1.23E-13  | 4.23E-13  |
| Unigene33514 | Potri.013G077900.1 | 3.2705  | 9.2283   | -1.4966 | Down | 1.48E-09  | 4.13E-09  |
| Unigene50851 | Potri.001G366300.2 | 8.6839  | 24.5032  | -1.4966 | Down | 9.77E-22  | 4.61E-21  |
| Unigene74291 | Potri.001G278200.1 | 7.2864  | 20.5599  | -1.4966 | Down | 1.48E-09  | 4.13E-09  |
| Unigene91827 | Potri.006G279600.3 | 25.1201 | 70.8936  | -1.4968 | Down | 1.61E-58  | 1.86E-57  |
| Unigene44906 | Potri.018G051500.1 | 7.0246  | 19.8261  | -1.4969 | Down | 7.38E-29  | 4.33E-28  |
| Unigene17996 | Potri.010G126200.1 | 17.9668 | 50.7126  | -1.497  | Down | 2.00E-34  | 1.37E-33  |
| Unigene22744 | Potri.010G129700.4 | 4.1352  | 11.6724  | -1.4971 | Down | 4.02E-11  | 1.22E-10  |
| Unigene43411 | Potri.009G131500.1 | 10.1266 | 28.5842  | -1.4971 | Down | 4.05E-59  | 4.75E-58  |
| Unigene400   | Potri.011G111900.1 | 55.9125 | 157.8478 | -1.4973 | Down | 6.19E-292 | 5.30E-290 |
| Unigene1640  | Potri.006G253100.1 | 48.5745 | 137.1339 | -1.4973 | Down | 1.12E-132 | 3.43E-131 |
| Unigene70119 | Potri.014G136800.1 | 3.9406  | 11.126   | -1.4974 | Down | 1.10E-12  | 3.61E-12  |
| Unigene41257 | Potri.004G062700.1 | 3.9192  | 11.0655  | -1.4974 | Down | 5.16E-07  | 1.22E-06  |
| Unigene71679 | Potri.002G085000.4 | 15.9072 | 44.9129  | -1.4974 | Down | 2.69E-18  | 1.12E-17  |
| Unigene34549 | Potri.014G132800.1 | 10.1784 | 28.7381  | -1.4975 | Down | 8.64E-63  | 1.08E-61  |
| Unigene47011 | Potri.006G143800.2 | 41.1103 | 116.0768 | -1.4975 | Down | 7.17E-70  | 1.00E-68  |
| Unigene18711 | Potri.002G173300.1 | 6.7238  | 18.9842  | -1.4975 | Down | 3.85E-46  | 3.47E-45  |
| Unigene43211 | Potri.014G084500.1 | 7.3415  | 20.7305  | -1.4976 | Down | 1.98E-25  | 1.05E-24  |
| Unigene50147 | Potri.015G091900.1 | 6.8205  | 19.2602  | -1.4977 | Down | 9.38E-51  | 9.30E-50  |
| Unigene21515 | Potri.010G194300.1 | 5.4248  | 15.319   | -1.4977 | Down | 1.52E-32  | 9.93E-32  |
| Unigene1962  | Potri.006G109300.1 | 4.6713  | 13.1917  | -1.4977 | Down | 3.05E-14  | 1.07E-13  |
| Unigene62588 | Potri.019G085500.2 | 9.0397  | 25.5294  | -1.4978 | Down | 2.15E-21  | 1.00E-20  |
| Unigene41055 | Potri.012G095400.1 | 8.6616  | 24.4642  | -1.498  | Down | 6.10E-23  | 2.99E-22  |
| Unigene18392 | Potri.007G131600.1 | 3.6896  | 10.4221  | -1.4981 | Down | 1.74E-24  | 8.95E-24  |
| Unigene4400  | Potri.002G139500.1 | 12.96   | 36.6094  | -1.4981 | Down | 2.38E-17  | 9.58E-17  |
| Unigene27481 | Potri.002G096900.1 | 23.8495 | 67.3737  | -1.4982 | Down | 1.10E-34  | 7.56E-34  |
| Unigene34219 | Potri.001G443200.3 | 4.4148  | 12.4713  | -1.4982 | Down | 4.96E-26  | 2.67E-25  |
| Unigene10744 | Potri.010G089700.1 | 12.566  | 35.4996  | -1.4983 | Down | 1.19E-146 | 4.13E-145 |
| Unigene46230 | Potri.007G012200.1 | 4.4522  | 12.5779  | -1.4983 | Down | 3.63E-10  | 1.05E-09  |
| Unigene49177 | Potri.014G092300.1 | 7.1814  | 20.29    | -1.4984 | Down | 1.89E-20  | 8.56E-20  |

|               |                     |         |          |         |      |           |           |
|---------------|---------------------|---------|----------|---------|------|-----------|-----------|
| Unigene29382  | Potri.002G216100.2  | 9.2541  | 26.1458  | -1.4984 | Down | 1.89E-20  | 8.56E-20  |
| Unigene37315  | Potri.018G020600.1  | 50.4339 | 142.4999 | -1.4985 | Down | 6.58E-190 | 3.22E-188 |
| Unigene48776  | Potri.014G144100.1  | 5.697   | 16.0972  | -1.4985 | Down | 9.89E-12  | 3.10E-11  |
| Unigene53675  | Potri.008G041900.1  | 16.4056 | 46.3547  | -1.4985 | Down | 5.37E-22  | 2.55E-21  |
| Unigene74888  | Potri.004G118900.1  | 9.0682  | 25.6227  | -1.4985 | Down | 9.89E-12  | 3.10E-11  |
| Unigene93491  | Potri.004G043200.4  | 16.8388 | 47.5787  | -1.4985 | Down | 1.50E-52  | 1.54E-51  |
| Unigene17472  | Potri.001G326500.1  | 6.0827  | 17.1869  | -1.4985 | Down | 9.89E-12  | 3.10E-11  |
| Unigene35934  | Potri.005G083100.2  | 57.0976 | 161.3381 | -1.4986 | Down | 7.66E-140 | 2.50E-138 |
| Unigene39047  | Potri.001G453200.1  | 15.9595 | 45.0978  | -1.4986 | Down | 2.77E-35  | 1.93E-34  |
| Unigene83192  | Potri.001G148600.3  | 15.9257 | 45.0014  | -1.4986 | Down | 1.53E-23  | 7.62E-23  |
| Unigene8294   | Potri.016G001800.1  | 4.2528  | 12.018   | -1.4987 | Down | 2.72E-13  | 9.20E-13  |
| Unigene76037  | Potri.011G023900.1  | 31.8045 | 89.8785  | -1.4987 | Down | 2.30E-38  | 1.73E-37  |
| Unigene2755   | Potri.010G198300.6  | 21.2183 | 59.965   | -1.4988 | Down | 8.17E-93  | 1.59E-91  |
| Unigene34544  | Potri.008G042000.3  | 3.2373  | 9.1491   | -1.4988 | Down | 7.56E-15  | 2.73E-14  |
| Unigene7888   | Potri.011G078300.5  | 4.6082  | 13.0251  | -1.499  | Down | 5.92E-18  | 2.44E-17  |
| Unigene6948   | Potri.007G036100.2  | 27.8687 | 78.7721  | -1.499  | Down | 3.28E-52  | 3.35E-51  |
| Unigene115111 | Potri.014G072400.3  | 12.2574 | 34.6473  | -1.4991 | Down | 1.67E-19  | 7.30E-19  |
| Unigene75684  | Potri.009G062200.1  | 16.9696 | 47.9688  | -1.4991 | Down | 4.72E-21  | 2.18E-20  |
| Unigene22187  | Potri.002G106900.1  | 18.6739 | 52.7918  | -1.4993 | Down | 3.74E-150 | 1.34E-148 |
| Unigene18239  | Potri.014G044000.1  | 13.1449 | 37.1659  | -1.4995 | Down | 1.45E-39  | 1.13E-38  |
| Unigene89261  | Potri.010G146100.2  | 21.7846 | 61.5944  | -1.4995 | Down | 4.20E-41  | 3.38E-40  |
| Unigene2833   | Potri.014G074900.1  | 10.7643 | 30.4375  | -1.4996 | Down | 1.48E-59  | 1.75E-58  |
| Unigene33926  | Potri.T081600.1     | 40.1457 | 113.5353 | -1.4998 | Down | 1.14E-104 | 2.59E-103 |
| Unigene46795  | Potri.018G117200.1  | 1.9503  | 5.5156   | -1.4998 | Down | 1.98E-04  | 3.69E-04  |
| Unigene43254  | Potri.018G097300.1  | 8.0523  | 22.7726  | -1.4998 | Down | 1.52E-55  | 1.67E-54  |
| Unigene7117   | Potri.017G097200.1  | 2.4797  | 7.0129   | -1.4998 | Down | 4.84E-06  | 1.05E-05  |
| Unigene105483 | Potri.017G088900.1  | 5.6713  | 16.0388  | -1.4998 | Down | 1.18E-21  | 5.55E-21  |
| Unigene6978   | Potri.016G038100.12 | 1.4381  | 4.0669   | -1.4998 | Down | 1.98E-04  | 3.69E-04  |
| Unigene46978  | Potri.012G084400.1  | 2.3312  | 6.5929   | -1.4998 | Down | 1.98E-04  | 3.69E-04  |
| Unigene10989  | Potri.009G169500.1  | 3.0466  | 8.616    | -1.4998 | Down | 2.23E-29  | 1.33E-28  |
| Unigene8725   | Potri.008G168100.3  | 13.0304 | 36.8511  | -1.4998 | Down | 5.25E-17  | 2.08E-16  |
| Unigene51793  | Potri.007G033800.1  | 39.7246 | 112.3444 | -1.4998 | Down | 7.81E-68  | 1.06E-66  |
| Unigene52884  | Potri.005G072200.3  | 4.273   | 12.0843  | -1.4998 | Down | 4.16E-20  | 1.86E-19  |
| Unigene6891   | Potri.004G222500.3  | 9.0747  | 25.6639  | -1.4998 | Down | 7.79E-28  | 4.44E-27  |
| Unigene58264  | Potri.004G142100.1  | 2.1781  | 6.1598   | -1.4998 | Down | 1.25E-07  | 3.07E-07  |
| Unigene76327  | Potri.004G070500.1  | 2.6524  | 7.5012   | -1.4998 | Down | 1.98E-04  | 3.69E-04  |
| Unigene11341  | Potri.002G159900.2  | 3.5271  | 9.9751   | -1.4998 | Down | 5.25E-17  | 2.08E-16  |
| Unigene5876   | Potri.001G165600.1  | 2.8784  | 8.1404   | -1.4998 | Down | 4.84E-06  | 1.05E-05  |
| Unigene73059  | Potri.001G123800.1  | 8.5664  | 24.2265  | -1.4998 | Down | 8.92E-11  | 2.66E-10  |

|              |                    |         |          |         |      |           |           |
|--------------|--------------------|---------|----------|---------|------|-----------|-----------|
| Unigene14934 | Potri.001G084000.2 | 4.2112  | 11.9097  | -1.4998 | Down | 2.44E-12  | 7.87E-12  |
| Unigene945   | Potri.019G096900.1 | 24.2996 | 68.7319  | -1.5    | Down | 4.73E-180 | 2.15E-178 |
| Unigene50102 | Potri.015G131200.1 | 12.9794 | 36.7103  | -1.5    | Down | 1.35E-97  | 2.81E-96  |
| Unigene44807 | Potri.014G019000.1 | 7.0663  | 19.9883  | -1.5001 | Down | 7.68E-44  | 6.57E-43  |
| Unigene22938 | Potri.012G119200.1 | 19.4637 | 55.0545  | -1.5001 | Down | 1.32E-54  | 1.42E-53  |
| Unigene40117 | Potri.001G150900.1 | 9.7904  | 27.6961  | -1.5002 | Down | 4.61E-33  | 3.05E-32  |
| Unigene87688 | Potri.011G070900.2 | 32.404  | 91.6725  | -1.5003 | Down | 3.33E-55  | 3.62E-54  |
| Unigene42497 | Potri.016G116600.2 | 4.3601  | 12.3353  | -1.5004 | Down | 2.64E-77  | 4.16E-76  |
| Unigene14888 | Potri.005G124300.4 | 18.331  | 51.863   | -1.5004 | Down | 8.38E-24  | 4.22E-23  |
| Unigene18976 | Potri.001G089900.1 | 11.3561 | 32.1283  | -1.5004 | Down | 2.39E-25  | 1.26E-24  |
| Unigene82837 | Potri.002G139500.1 | 13.9873 | 39.5763  | -1.5005 | Down | 1.04E-20  | 4.74E-20  |
| Unigene23198 | Potri.008G045900.1 | 8.4356  | 23.8702  | -1.5006 | Down | 1.16E-33  | 7.76E-33  |
| Unigene2271  | Potri.013G028300.1 | 17.1318 | 48.4792  | -1.5007 | Down | 1.51E-62  | 1.88E-61  |
| Unigene74879 | Potri.004G208900.1 | 14.2012 | 40.1852  | -1.5007 | Down | 1.30E-17  | 5.31E-17  |
| Unigene31939 | Potri.003G078800.1 | 9.5111  | 26.9136  | -1.5007 | Down | 1.28E-65  | 1.68E-64  |
| Unigene11717 | Potri.018G018900.1 | 6.3027  | 17.8384  | -1.5009 | Down | 1.03E-48  | 9.77E-48  |
| Unigene13828 | Potri.005G045500.2 | 9.0894  | 25.7246  | -1.5009 | Down | 6.97E-39  | 5.32E-38  |
| Unigene77342 | Potri.017G069600.1 | 9.5681  | 27.0813  | -1.501  | Down | 6.02E-13  | 2.00E-12  |
| Unigene33148 | Potri.017G065200.4 | 5.7685  | 16.3269  | -1.501  | Down | 2.10E-24  | 1.08E-23  |
| Unigene37559 | Potri.015G133400.1 | 36.8151 | 104.2032 | -1.501  | Down | 1.22E-45  | 1.09E-44  |
| Unigene3292  | Potri.012G096300.1 | 23.6245 | 66.8652  | -1.501  | Down | 1.92E-105 | 4.37E-104 |
| Unigene4923  | Potri.012G004000.3 | 2.9639  | 8.3888   | -1.501  | Down | 2.10E-24  | 1.08E-23  |
| Unigene576   | Potri.005G253000.1 | 5.3427  | 15.1231  | -1.5011 | Down | 1.01E-32  | 6.62E-32  |
| Unigene755   | Potri.014G012400.1 | 1.75    | 4.9538   | -1.5012 | Down | 2.19E-11  | 6.75E-11  |
| Unigene21960 | Potri.009G069600.1 | 1.5194  | 4.301    | -1.5012 | Down | 2.19E-11  | 6.75E-11  |
| Unigene45547 | Potri.007G065300.1 | 13.4105 | 37.9624  | -1.5012 | Down | 2.59E-49  | 2.49E-48  |
| Unigene50753 | Potri.006G000500.3 | 23.3051 | 65.9702  | -1.5012 | Down | 2.70E-80  | 4.45E-79  |
| Unigene6377  | Potri.018G067900.2 | 3.5637  | 10.089   | -1.5013 | Down | 2.10E-36  | 1.51E-35  |
| Unigene4846  | Potri.010G034300.1 | 53.6064 | 151.7547 | -1.5013 | Down | 7.76E-112 | 1.91E-110 |
| Unigene44550 | Potri.001G058100.3 | 45.1005 | 127.6741 | -1.5013 | Down | 3.48E-205 | 1.87E-203 |
| Unigene8575  | Potri.013G116200.1 | 3.5881  | 10.1587  | -1.5014 | Down | 8.08E-10  | 2.28E-09  |
| Unigene3798  | Potri.005G258700.4 | 8.08    | 22.8762  | -1.5014 | Down | 3.25E-18  | 1.35E-17  |
| Unigene12445 | Potri.001G255800.1 | 15.6324 | 44.2586  | -1.5014 | Down | 3.68E-43  | 3.10E-42  |
| Unigene17274 | Potri.016G056500.1 | 10.0624 | 28.4929  | -1.5016 | Down | 1.53E-38  | 1.15E-37  |
| Unigene42421 | Potri.008G161300.2 | 6.3786  | 18.0616  | -1.5016 | Down | 1.38E-53  | 1.45E-52  |
| Unigene43779 | Potri.005G033700.2 | 13.096  | 37.0827  | -1.5016 | Down | 1.53E-38  | 1.15E-37  |
| Unigene21656 | Potri.019G060900.1 | 13.2632 | 37.5573  | -1.5017 | Down | 4.76E-52  | 4.85E-51  |
| Unigene38762 | Potri.017G111500.2 | 14.78   | 41.8529  | -1.5017 | Down | 8.54E-59  | 9.94E-58  |
| Unigene84689 | Potri.008G064400.1 | 62.5199 | 177.0437 | -1.5017 | Down | 1.72E-92  | 3.32E-91  |

|               |                    |         |          |         |      |           |           |
|---------------|--------------------|---------|----------|---------|------|-----------|-----------|
| Unigene119320 | Potri.019G043100.1 | 1.917   | 5.4288   | -1.5018 | Down | 3.02E-08  | 7.77E-08  |
| Unigene103517 | Potri.013G021500.1 | 2.632   | 7.4537   | -1.5018 | Down | 6.48E-22  | 3.07E-21  |
| Unigene49533  | Potri.011G049400.1 | 4.1182  | 11.6626  | -1.5018 | Down | 3.02E-08  | 7.77E-08  |
| Unigene37335  | Potri.005G139800.1 | 6.072   | 17.1955  | -1.5018 | Down | 3.02E-08  | 7.77E-08  |
| Unigene2761   | Potri.003G043300.3 | 9.9276  | 28.1144  | -1.5018 | Down | 4.14E-15  | 1.51E-14  |
| Unigene2798   | Potri.005G001300.1 | 20.9068 | 59.2113  | -1.5019 | Down | 1.20E-52  | 1.24E-51  |
| Unigene23345  | Potri.004G156000.2 | 10.4879 | 29.7061  | -1.502  | Down | 1.31E-25  | 6.99E-25  |
| Unigene8483   | Potri.002G010800.1 | 4.4473  | 12.5965  | -1.502  | Down | 1.49E-13  | 5.09E-13  |
| Unigene13557  | Potri.001G241400.2 | 6.8228  | 19.3259  | -1.5021 | Down | 5.43E-60  | 6.45E-59  |
| Unigene11771  | Potri.019G021500.1 | 6.984   | 19.7861  | -1.5024 | Down | 9.39E-28  | 5.34E-27  |
| Unigene35821  | Potri.003G189500.2 | 2.3752  | 6.7291   | -1.5024 | Down | 1.16E-06  | 2.65E-06  |
| Unigene11112  | Potri.001G390700.1 | 5.6157  | 15.9098  | -1.5024 | Down | 5.56E-33  | 3.67E-32  |
| Unigene35003  | Potri.002G075400.1 | 27.9747 | 79.2603  | -1.5025 | Down | 1.78E-106 | 4.10E-105 |
| Unigene72011  | Potri.010G114100.7 | 18.1949 | 51.5547  | -1.5026 | Down | 5.70E-21  | 2.62E-20  |
| Unigene19717  | Potri.008G012600.4 | 7.0541  | 19.9885  | -1.5026 | Down | 1.03E-15  | 3.86E-15  |
| Unigene35711  | Potri.006G174700.1 | 14.9497 | 42.3596  | -1.5026 | Down | 2.42E-40  | 1.92E-39  |
| Unigene29767  | Potri.016G119300.5 | 6.3767  | 18.0692  | -1.5027 | Down | 1.03E-15  | 3.85E-15  |
| Unigene5765   | Potri.001G213400.5 | 19.1321 | 54.2154  | -1.5027 | Down | 1.15E-24  | 5.96E-24  |
| Unigene44180  | Potri.014G123800.5 | 3.674   | 10.412   | -1.5028 | Down | 1.98E-10  | 5.79E-10  |
| Unigene48611  | Potri.007G086700.3 | 7.09    | 20.0926  | -1.5028 | Down | 1.98E-10  | 5.79E-10  |
| Unigene116948 | Potri.006G121500.3 | 5.0763  | 14.3858  | -1.5028 | Down | 1.98E-10  | 5.79E-10  |
| Unigene32385  | Potri.005G108100.1 | 16.4439 | 46.6002  | -1.5028 | Down | 1.33E-104 | 3.00E-103 |
| Unigene34719  | Potri.018G140200.1 | 3.8753  | 10.9833  | -1.5029 | Down | 1.01E-35  | 7.14E-35  |
| Unigene26171  | Potri.006G065100.1 | 31.5492 | 89.4121  | -1.5029 | Down | 6.10E-41  | 4.89E-40  |
| Unigene2216   | Potri.001G157300.1 | 33.1702 | 94.0086  | -1.5029 | Down | 2.46E-96  | 5.01E-95  |
| Unigene8048   | Potri.016G056100.1 | 4.1729  | 11.8273  | -1.503  | Down | 8.23E-27  | 4.55E-26  |
| Unigene49415  | Potri.010G147900.1 | 3.6679  | 10.3959  | -1.503  | Down | 3.68E-14  | 1.29E-13  |
| Unigene49097  | Potri.008G085800.2 | 5.4118  | 15.3385  | -1.503  | Down | 3.68E-14  | 1.29E-13  |
| Unigene3845   | Potri.007G128300.3 | 10.804  | 30.6239  | -1.5031 | Down | 7.15E-18  | 2.94E-17  |
| Unigene21438  | Potri.007G027900.1 | 15.185  | 43.0417  | -1.5031 | Down | 4.59E-99  | 9.73E-98  |
| Unigene50553  | Potri.001G300100.1 | 8.468   | 24.0025  | -1.5031 | Down | 7.15E-18  | 2.94E-17  |
| Unigene39503  | Potri.008G109300.3 | 2.8151  | 7.9802   | -1.5032 | Down | 1.22E-32  | 7.96E-32  |
| Unigene21501  | Potri.006G165500.1 | 11.6959 | 33.1578  | -1.5033 | Down | 4.79E-62  | 5.91E-61  |
| Unigene41469  | Potri.016G018400.1 | 2.0844  | 5.9096   | -1.5034 | Down | 4.63E-05  | 9.19E-05  |
| Unigene5340   | Potri.016G007500.1 | 2.8692  | 8.1347   | -1.5034 | Down | 4.63E-05  | 9.19E-05  |
| Unigene2918   | Potri.015G030700.1 | 51.5169 | 146.0543 | -1.5034 | Down | 1.02E-120 | 2.78E-119 |
| Unigene19810  | Potri.010G159100.1 | 2.7792  | 7.8795   | -1.5034 | Down | 4.63E-05  | 9.19E-05  |
| Unigene12885  | Potri.008G172500.1 | 4.4665  | 12.6634  | -1.5034 | Down | 1.33E-12  | 4.35E-12  |
| Unigene88024  | Potri.006G181900.1 | 2.1739  | 6.1634   | -1.5034 | Down | 4.63E-05  | 9.19E-05  |



|               |                    |         |          |         |      |           |           |
|---------------|--------------------|---------|----------|---------|------|-----------|-----------|
| Unigene69430  | Potri.018G041700.1 | 3.1404  | 8.9037   | -1.5035 | Down | 1.33E-12  | 4.35E-12  |
| Unigene103673 | Potri.013G032100.1 | 1.8848  | 5.3438   | -1.5035 | Down | 4.63E-05  | 9.19E-05  |
| Unigene13685  | Potri.012G022700.1 | 5.162   | 14.6359  | -1.5035 | Down | 1.18E-73  | 1.76E-72  |
| Unigene35281  | Potri.010G086600.3 | 1.6143  | 4.5769   | -1.5035 | Down | 4.63E-05  | 9.19E-05  |
| Unigene519    | Potri.010G001000.2 | 4.8896  | 13.8637  | -1.5035 | Down | 5.67E-59  | 6.62E-58  |
| Unigene31353  | Potri.009G129700.2 | 2.4522  | 6.9525   | -1.5035 | Down | 7.36E-09  | 1.96E-08  |
| Unigene95140  | Potri.004G212700.2 | 1.5507  | 4.3966   | -1.5035 | Down | 4.63E-05  | 9.19E-05  |
| Unigene51162  | Potri.001G261000.3 | 1.4089  | 3.9946   | -1.5035 | Down | 4.63E-05  | 9.19E-05  |
| Unigene2070   | Potri.007G034200.1 | 11.7246 | 33.2448  | -1.5036 | Down | 6.37E-37  | 4.64E-36  |
| Unigene15085  | Potri.007G036600.1 | 5.5513  | 15.742   | -1.5037 | Down | 1.43E-59  | 1.69E-58  |
| Unigene109563 | Potri.018G113100.1 | 15.0234 | 42.6038  | -1.5038 | Down | 1.78E-18  | 7.49E-18  |
| Unigene21556  | Potri.006G047100.4 | 5.7121  | 16.2003  | -1.5039 | Down | 2.53E-24  | 1.29E-23  |
| Unigene44545  | Potri.005G257400.4 | 30.954  | 87.7905  | -1.5039 | Down | 4.08E-79  | 6.62E-78  |
| Unigene29126  | Potri.002G173300.1 | 10.3441 | 29.3359  | -1.5039 | Down | 1.64E-67  | 2.22E-66  |
| Unigene234    | Potri.019G048100.2 | 8.9033  | 25.252   | -1.504  | Down | 7.96E-53  | 8.23E-52  |
| Unigene55149  | Potri.016G051500.1 | 1.4146  | 4.0123   | -1.504  | Down | 4.86E-11  | 1.47E-10  |
| Unigene51283  | Potri.016G002100.1 | 15.1885 | 43.0794  | -1.504  | Down | 3.71E-30  | 2.26E-29  |
| Unigene28049  | Potri.008G129100.1 | 16.845  | 47.7778  | -1.504  | Down | 1.16E-39  | 9.03E-39  |
| Unigene34826  | Potri.019G060900.1 | 10.8843 | 30.8742  | -1.5042 | Down | 3.63E-118 | 9.60E-117 |
| Unigene53794  | Potri.015G144600.1 | 14.0195 | 39.7695  | -1.5042 | Down | 8.88E-23  | 4.33E-22  |
| Unigene49115  | Potri.015G055500.5 | 7.3921  | 20.9694  | -1.5042 | Down | 8.88E-23  | 4.33E-22  |
| Unigene39872  | Potri.017G058300.3 | 11.7035 | 33.2004  | -1.5043 | Down | 1.29E-28  | 7.54E-28  |
| Unigene16603  | Potri.015G109300.3 | 89.4092 | 253.6396 | -1.5043 | Down | 2.54E-159 | 9.86E-158 |
| Unigene34772  | Potri.004G076600.1 | 26.6287 | 75.5426  | -1.5043 | Down | 1.89E-161 | 7.45E-160 |
| Unigene6590   | Potri.008G020100.2 | 2.0235  | 5.7407   | -1.5044 | Down | 2.79E-07  | 6.71E-07  |
| Unigene3342   | Potri.007G117700.1 | 9.2631  | 26.2801  | -1.5044 | Down | 9.30E-31  | 5.77E-30  |
| Unigene47221  | Potri.006G279400.2 | 44.7595 | 126.9852 | -1.5044 | Down | 1.23E-65  | 1.62E-64  |
| Unigene107074 | Potri.005G206400.1 | 1.3789  | 3.9121   | -1.5044 | Down | 3.29E-13  | 1.11E-12  |
| Unigene109699 | Potri.005G171300.2 | 5.1566  | 14.6296  | -1.5044 | Down | 2.79E-07  | 6.72E-07  |
| Unigene29413  | Potri.004G081200.1 | 3.3806  | 9.591    | -1.5044 | Down | 3.29E-13  | 1.11E-12  |
| Unigene112677 | Potri.004G057100.1 | 27.4038 | 77.7461  | -1.5044 | Down | 1.40E-36  | 1.01E-35  |
| Unigene16009  | Potri.017G076700.1 | 24.3097 | 68.9746  | -1.5045 | Down | 4.52E-27  | 2.52E-26  |
| Unigene43031  | Potri.007G034900.1 | 22.149  | 62.8463  | -1.5046 | Down | 3.16E-113 | 7.91E-112 |
| Unigene41082  | Potri.014G000500.5 | 11.2215 | 31.8417  | -1.5047 | Down | 2.26E-15  | 8.38E-15  |
| Unigene18194  | Potri.013G004600.1 | 3.1907  | 9.0538   | -1.5047 | Down | 2.26E-15  | 8.39E-15  |
| Unigene45260  | Potri.010G113700.1 | 8.0489  | 22.8421  | -1.5048 | Down | 1.58E-17  | 6.38E-17  |
| Unigene13514  | Potri.009G123100.1 | 11.9475 | 33.9063  | -1.5048 | Down | 1.58E-25  | 8.41E-25  |
| Unigene10139  | Potri.006G045500.1 | 3.4836  | 9.8861   | -1.5048 | Down | 1.80E-09  | 4.97E-09  |
| Unigene17776  | Potri.002G229100.2 | 4.4456  | 12.6163  | -1.5048 | Down | 1.80E-09  | 4.97E-09  |

|               |                    |         |          |         |      |           |           |
|---------------|--------------------|---------|----------|---------|------|-----------|-----------|
| Unigene45448  | Potri.013G003700.1 | 2.3527  | 6.6769   | -1.5049 | Down | 1.80E-09  | 4.97E-09  |
| Unigene45627  | Potri.011G112800.2 | 14.0558 | 39.8902  | -1.5049 | Down | 3.12E-91  | 5.94E-90  |
| Unigene6740   | Potri.010G192900.2 | 18.2692 | 51.8489  | -1.5049 | Down | 1.34E-43  | 1.14E-42  |
| Unigene84659  | Potri.010G086700.1 | 12.3447 | 35.0369  | -1.505  | Down | 1.11E-19  | 4.86E-19  |
| Unigene23910  | Potri.001G370700.1 | 1.9261  | 5.4671   | -1.5051 | Down | 1.20E-11  | 3.73E-11  |
| Unigene36885  | Potri.016G068000.1 | 15.598  | 44.2768  | -1.5052 | Down | 5.55E-24  | 2.81E-23  |
| Unigene20731  | Potri.004G203800.2 | 12.9591 | 36.7859  | -1.5052 | Down | 5.55E-24  | 2.81E-23  |
| Unigene23903  | Potri.008G179400.1 | 22.6385 | 64.2654  | -1.5053 | Down | 8.02E-63  | 1.00E-61  |
| Unigene11257  | Potri.001G103600.2 | 1.8387  | 5.2197   | -1.5053 | Down | 8.14E-14  | 2.82E-13  |
| Unigene4494   | Potri.012G072200.1 | 6.9834  | 19.8271  | -1.5055 | Down | 3.92E-18  | 1.63E-17  |
| Unigene27789  | Potri.016G038200.1 | 13.7669 | 39.0892  | -1.5056 | Down | 4.04E-41  | 3.26E-40  |
| Unigene53306  | Potri.009G164400.1 | 12.7918 | 36.3212  | -1.5056 | Down | 1.95E-22  | 9.40E-22  |
| Unigene94482  | Potri.007G011400.1 | 3.3727  | 9.5767   | -1.5056 | Down | 1.39E-24  | 7.17E-24  |
| Unigene42275  | Potri.005G223900.2 | 10.7576 | 30.5451  | -1.5056 | Down | 1.95E-22  | 9.40E-22  |
| Unigene28899  | Potri.004G159300.2 | 4.3523  | 12.3579  | -1.5056 | Down | 1.95E-22  | 9.40E-22  |
| Unigene43227  | Potri.012G034800.1 | 9.365   | 26.5928  | -1.5057 | Down | 4.36E-81  | 7.24E-80  |
| Unigene17449  | Potri.006G262200.1 | 10.3033 | 29.2569  | -1.5057 | Down | 9.92E-27  | 5.47E-26  |
| Unigene187    | Potri.006G121100.1 | 8.0652  | 22.9019  | -1.5057 | Down | 3.32E-108 | 7.82E-107 |
| Unigene16383  | Potri.014G054700.1 | 1.5483  | 4.3976   | -1.506  | Down | 1.09E-05  | 2.31E-05  |
| Unigene12377  | Potri.013G109400.1 | 2.8151  | 7.9957   | -1.506  | Down | 4.40E-10  | 1.26E-09  |
| Unigene8771   | Potri.008G139900.1 | 2.1204  | 6.0226   | -1.506  | Down | 1.09E-05  | 2.31E-05  |
| Unigene9314   | Potri.008G035700.1 | 9.0175  | 25.6125  | -1.506  | Down | 9.76E-19  | 4.15E-18  |
| Unigene48929  | Potri.017G049000.2 | 2.088   | 5.9306   | -1.5061 | Down | 1.09E-05  | 2.31E-05  |
| Unigene49696  | Potri.016G120500.1 | 1.5084  | 4.2845   | -1.5061 | Down | 1.09E-05  | 2.31E-05  |
| Unigene40458  | Potri.008G120900.1 | 5.6788  | 16.1297  | -1.5061 | Down | 4.40E-10  | 1.26E-09  |
| Unigene17010  | Potri.008G118200.2 | 4.9934  | 14.183   | -1.5061 | Down | 2.02E-14  | 7.16E-14  |
| Unigene33188  | Potri.008G063800.5 | 3.8983  | 11.0724  | -1.5061 | Down | 4.40E-10  | 1.26E-09  |
| Unigene52244  | Potri.005G187300.2 | 3.0849  | 8.7622   | -1.5061 | Down | 6.76E-08  | 1.70E-07  |
| Unigene36035  | Potri.001G171500.1 | 1.2624  | 3.5858   | -1.5061 | Down | 1.09E-05  | 2.31E-05  |
| Unigene44404  | Potri.001G297300.2 | 7.8312  | 22.2487  | -1.5064 | Down | 6.22E-28  | 3.56E-27  |
| Unigene47582  | Potri.015G078000.2 | 9.7303  | 27.6466  | -1.5065 | Down | 1.72E-21  | 8.03E-21  |
| Unigene50437  | Potri.008G043400.2 | 4.439   | 12.6121  | -1.5065 | Down | 1.18E-45  | 1.05E-44  |
| Unigene87176  | Potri.008G178200.1 | 42.2011 | 119.9116 | -1.5066 | Down | 2.43E-70  | 3.44E-69  |
| Unigene109552 | Potri.006G229300.9 | 29.6662 | 84.2955  | -1.5066 | Down | 5.83E-35  | 4.03E-34  |
| Unigene43002  | Potri.016G128500.1 | 4.5969  | 13.0627  | -1.5067 | Down | 1.12E-30  | 6.94E-30  |
| Unigene41808  | Potri.014G159600.1 | 13.1076 | 37.2471  | -1.5067 | Down | 1.12E-30  | 6.94E-30  |
| Unigene18349  | Potri.010G106200.1 | 3.623   | 10.2952  | -1.5067 | Down | 1.12E-30  | 6.94E-30  |
| Unigene33208  | Potri.002G232200.1 | 40.0261 | 113.7406 | -1.5067 | Down | 4.51E-73  | 6.64E-72  |
| Unigene1020   | Potri.002G080600.2 | 10.0016 | 28.4213  | -1.5067 | Down | 4.07E-44  | 3.50E-43  |

|               |                     |         |          |         |      |           |           |
|---------------|---------------------|---------|----------|---------|------|-----------|-----------|
| Unigene38639  | Potri.010G197400.6  | 9.2701  | 26.3445  | -1.5068 | Down | 2.18E-26  | 1.19E-25  |
| Unigene50244  | Potri.009G153800.1  | 3.7737  | 10.7239  | -1.5068 | Down | 4.99E-15  | 1.82E-14  |
| Unigene5209   | Potri.006G222300.1  | 25.4729 | 72.3894  | -1.5068 | Down | 7.70E-40  | 6.02E-39  |
| Unigene8106   | Potri.011G071900.1  | 4.9962  | 14.1994  | -1.5069 | Down | 7.28E-13  | 2.41E-12  |
| Unigene21032  | Potri.006G273400.1  | 5.3024  | 15.0695  | -1.5069 | Down | 3.05E-24  | 1.56E-23  |
| Unigene12088  | Potri.004G067200.1  | 10.068  | 28.6152  | -1.507  | Down | 4.29E-22  | 2.04E-21  |
| Unigene17893  | Potri.001G068400.1  | 7.2527  | 20.6135  | -1.507  | Down | 4.29E-22  | 2.04E-21  |
| Unigene103261 | Potri.005G083200.1  | 7.6889  | 21.8551  | -1.5071 | Down | 1.08E-10  | 3.20E-10  |
| Unigene11226  | Potri.005G014000.3  | 8.4523  | 24.0241  | -1.5071 | Down | 9.89E-59  | 1.15E-57  |
| Unigene33598  | Potri.005G059000.2  | 10.4955 | 29.8345  | -1.5072 | Down | 5.45E-27  | 3.03E-26  |
| Unigene36366  | Potri.009G100100.2  | 11.4711 | 32.6106  | -1.5073 | Down | 7.05E-32  | 4.51E-31  |
| Unigene24273  | Potri.005G091400.1  | 28.9961 | 82.4294  | -1.5073 | Down | 2.52E-87  | 4.57E-86  |
| Unigene36629  | Potri.018G115500.1  | 13.2294 | 37.6118  | -1.5074 | Down | 1.24E-15  | 4.64E-15  |
| Unigene35479  | Potri.018G096700.2  | 4.7115  | 13.3951  | -1.5074 | Down | 1.64E-08  | 4.29E-08  |
| Unigene11083  | Potri.015G039800.1  | 13.2552 | 37.6833  | -1.5074 | Down | 3.83E-127 | 1.10E-125 |
| Unigene83694  | Potri.013G135100.5  | 9.8734  | 28.0705  | -1.5074 | Down | 1.24E-15  | 4.64E-15  |
| Unigene6424   | Potri.007G011100.2  | 24.1012 | 68.5209  | -1.5074 | Down | 8.69E-51  | 8.63E-50  |
| Unigene14070  | Potri.005G242100.1  | 3.3237  | 9.4495   | -1.5074 | Down | 1.64E-08  | 4.29E-08  |
| Unigene73490  | Potri.003G098400.1  | 17.1472 | 48.7555  | -1.5076 | Down | 1.51E-20  | 6.85E-20  |
| Unigene3146   | Potri.019G002900.1  | 11.7003 | 33.2699  | -1.5077 | Down | 7.57E-92  | 1.45E-90  |
| Unigene10932  | Potri.012G124600.1  | 4.7229  | 13.4298  | -1.5077 | Down | 3.00E-49  | 2.88E-48  |
| Unigene7322   | Potri.004G211300.3  | 5.0674  | 14.4094  | -1.5077 | Down | 1.80E-13  | 6.13E-13  |
| Unigene44907  | Potri.003G116500.2  | 6.5471  | 18.6174  | -1.5077 | Down | 3.08E-42  | 2.54E-41  |
| Unigene27230  | Potri.014G120100.3  | 11.6561 | 33.1528  | -1.508  | Down | 3.08E-16  | 1.18E-15  |
| Unigene103376 | Potri.010G254400.1  | 2.5478  | 7.2465   | -1.508  | Down | 2.61E-06  | 5.80E-06  |
| Unigene41584  | Potri.007G000600.1  | 2.9416  | 8.3666   | -1.508  | Down | 2.61E-06  | 5.80E-06  |
| Unigene2986   | Potri.004G123400.1  | 4.5212  | 12.8593  | -1.508  | Down | 3.77E-21  | 1.74E-20  |
| Unigene55835  | Potri.002G243400.10 | 4.8191  | 13.7066  | -1.508  | Down | 2.65E-11  | 8.13E-11  |
| Unigene23150  | Potri.015G084800.1  | 1.2844  | 3.6532   | -1.5081 | Down | 2.61E-06  | 5.80E-06  |
| Unigene33990  | Potri.005G096400.1  | 2.5202  | 7.1682   | -1.5081 | Down | 2.65E-11  | 8.13E-11  |
| Unigene7623   | Potri.002G149400.2  | 2.8516  | 8.1108   | -1.5081 | Down | 2.65E-11  | 8.13E-11  |
| Unigene23715  | Potri.019G032300.1  | 3.9226  | 11.1584  | -1.5082 | Down | 6.69E-24  | 3.38E-23  |
| Unigene43150  | Potri.016G127500.1  | 4.7727  | 13.5773  | -1.5083 | Down | 1.03E-78  | 1.66E-77  |
| Unigene52394  | Potri.012G082700.2  | 9.6783  | 27.5321  | -1.5083 | Down | 5.35E-19  | 2.30E-18  |
| Unigene22632  | Potri.004G050900.2  | 8.3199  | 23.668   | -1.5083 | Down | 5.35E-19  | 2.30E-18  |
| Unigene28761  | Potri.002G233500.4  | 17.3871 | 49.4621  | -1.5083 | Down | 1.41E-83  | 2.43E-82  |
| Unigene38035  | Potri.015G002800.1  | 54.2968 | 154.4672 | -1.5084 | Down | 4.21E-136 | 1.33E-134 |
| Unigene16215  | Potri.009G086300.1  | 3.7952  | 10.797   | -1.5084 | Down | 4.45E-14  | 1.56E-13  |
| Unigene53859  | Potri.001G066800.1  | 6.7817  | 19.2935  | -1.5084 | Down | 4.45E-14  | 1.56E-13  |

|               |                    |         |          |         |      |           |           |
|---------------|--------------------|---------|----------|---------|------|-----------|-----------|
| Unigene32488  | Potri.003G031000.2 | 43.3361 | 123.294  | -1.5085 | Down | 1.44E-134 | 4.47E-133 |
| Unigene329    | Potri.010G142700.1 | 5.3877  | 15.3299  | -1.5086 | Down | 4.00E-09  | 1.08E-08  |
| Unigene11107  | Potri.006G125200.1 | 8.3254  | 23.6899  | -1.5087 | Down | 1.21E-75  | 1.86E-74  |
| Unigene18514  | Potri.006G036500.1 | 10.6111 | 30.1966  | -1.5088 | Down | 2.33E-40  | 1.84E-39  |
| Unigene50199  | Potri.005G066300.1 | 3.2221  | 9.169    | -1.5088 | Down | 1.33E-19  | 5.85E-19  |
| Unigene32817  | Potri.013G154100.3 | 6.0087  | 17.1001  | -1.5089 | Down | 2.35E-22  | 1.13E-21  |
| Unigene89939  | Potri.013G007800.5 | 16.0722 | 45.7393  | -1.5089 | Down | 9.73E-33  | 6.37E-32  |
| Unigene22266  | Potri.011G065100.2 | 4.7068  | 13.3951  | -1.5089 | Down | 2.35E-22  | 1.13E-21  |
| Unigene7893   | Potri.006G129000.3 | 9.5597  | 27.2069  | -1.5089 | Down | 1.76E-35  | 1.24E-34  |
| Unigene23690  | Potri.003G023600.1 | 29.4545 | 83.828   | -1.5089 | Down | 2.67E-82  | 4.51E-81  |
| Unigene22644  | Potri.002G157200.1 | 5.4235  | 15.4346  | -1.5089 | Down | 2.35E-22  | 1.13E-21  |
| Unigene66896  | Potri.016G053700.2 | 5.894   | 16.7754  | -1.509  | Down | 1.10E-14  | 3.97E-14  |
| Unigene41680  | Potri.015G009500.1 | 8.5585  | 24.3588  | -1.509  | Down | 1.10E-14  | 3.97E-14  |
| Unigene21699  | Potri.010G111900.1 | 4.5618  | 12.9833  | -1.509  | Down | 3.21E-38  | 2.41E-37  |
| Unigene32357  | Potri.004G117900.1 | 6.1737  | 17.5706  | -1.509  | Down | 4.19E-25  | 2.20E-24  |
| Unigene108132 | Potri.015G133400.1 | 14.7379 | 41.9494  | -1.5091 | Down | 1.90E-17  | 7.68E-17  |
| Unigene12919  | Potri.010G016700.1 | 4.9692  | 14.1441  | -1.5091 | Down | 1.90E-17  | 7.68E-17  |
| Unigene28978  | Potri.009G005900.1 | 11.4615 | 32.6238  | -1.5091 | Down | 9.13E-81  | 1.51E-79  |
| Unigene47117  | Potri.008G140700.1 | 11.2315 | 31.9689  | -1.5091 | Down | 1.90E-17  | 7.68E-17  |
| Unigene88239  | Potri.003G185600.4 | 35.1455 | 100.0355 | -1.5091 | Down | 3.05E-62  | 3.78E-61  |
| Unigene126    | Potri.013G004200.2 | 10.9615 | 31.205   | -1.5093 | Down | 4.07E-114 | 1.03E-112 |
| Unigene71881  | Potri.019G020900.6 | 17.831  | 50.7706  | -1.5096 | Down | 8.29E-21  | 3.79E-20  |
| Unigene41077  | Potri.016G087400.1 | 1.7234  | 4.9071   | -1.5096 | Down | 4.55E-04  | 8.10E-04  |
| Unigene103319 | Potri.014G023100.1 | 1.3254  | 3.7737   | -1.5096 | Down | 4.55E-04  | 8.10E-04  |
| Unigene51342  | Potri.011G034900.1 | 1.1604  | 3.3041   | -1.5096 | Down | 4.55E-04  | 8.10E-04  |
| Unigene46689  | Potri.009G056600.3 | 1.9705  | 5.6108   | -1.5096 | Down | 4.55E-04  | 8.10E-04  |
| Unigene73542  | Potri.009G042000.1 | 2.4749  | 7.0467   | -1.5096 | Down | 4.55E-04  | 8.10E-04  |
| Unigene26499  | Potri.006G165400.1 | 1.4425  | 4.1073   | -1.5096 | Down | 4.55E-04  | 8.10E-04  |
| Unigene10019  | Potri.005G122600.1 | 3.5047  | 9.9789   | -1.5096 | Down | 9.78E-10  | 2.75E-09  |
| Unigene28097  | Potri.003G222600.1 | 4.3276  | 12.322   | -1.5096 | Down | 9.78E-10  | 2.75E-09  |
| Unigene84167  | Potri.003G062800.3 | 18.9201 | 53.8715  | -1.5096 | Down | 4.71E-29  | 2.78E-28  |
| Unigene28174  | Potri.002G159900.2 | 2.8692  | 8.1695   | -1.5096 | Down | 6.27E-07  | 1.46E-06  |
| Unigene115014 | Potri.002G128100.1 | 1.8583  | 5.2913   | -1.5096 | Down | 4.55E-04  | 8.10E-04  |
| Unigene63468  | Potri.002G065500.1 | 3.5767  | 10.1839  | -1.5096 | Down | 4.73E-18  | 1.96E-17  |
| Unigene102115 | Potri.003G003100.1 | 1.0947  | 3.1171   | -1.5097 | Down | 4.55E-04  | 8.10E-04  |
| Unigene18250  | Potri.019G099100.2 | 13.1437 | 37.4296  | -1.5098 | Down | 7.03E-38  | 5.24E-37  |
| Unigene112284 | Potri.007G073200.3 | 30.7992 | 87.7071  | -1.5098 | Down | 1.28E-40  | 1.02E-39  |
| Unigene7905   | Potri.005G215800.1 | 12.1613 | 34.6328  | -1.5098 | Down | 7.85E-66  | 1.03E-64  |
| Unigene13752  | Potri.001G150900.1 | 6.4241  | 18.2953  | -1.5099 | Down | 6.56E-27  | 3.64E-26  |

|               |                    |         |          |         |      |           |           |
|---------------|--------------------|---------|----------|---------|------|-----------|-----------|
| Unigene50072  | Potri.014G189900.6 | 5.321   | 15.1546  | -1.51   | Down | 2.07E-21  | 9.65E-21  |
| Unigene33065  | Potri.013G047300.3 | 10.855  | 30.9165  | -1.51   | Down | 1.77E-38  | 1.34E-37  |
| Unigene74872  | Potri.009G095100.1 | 12.4902 | 35.5768  | -1.5101 | Down | 6.78E-16  | 2.57E-15  |
| Unigene53796  | Potri.008G140700.1 | 16.9777 | 48.3608  | -1.5102 | Down | 1.64E-27  | 9.28E-27  |
| Unigene2015   | Potri.001G376400.4 | 11.5092 | 32.7844  | -1.5102 | Down | 4.44E-39  | 3.41E-38  |
| Unigene75548  | Potri.001G056800.1 | 22.2785 | 63.4599  | -1.5102 | Down | 1.64E-27  | 9.28E-27  |
| Unigene29066  | Potri.010G246500.2 | 6.388   | 18.1971  | -1.5103 | Down | 9.19E-25  | 4.77E-24  |
| Unigene28989  | Potri.006G227200.3 | 8.0005  | 22.791   | -1.5103 | Down | 3.73E-45  | 3.29E-44  |
| Unigene7770   | Potri.001G303700.1 | 15.5035 | 44.1644  | -1.5103 | Down | 3.18E-68  | 4.34E-67  |
| Unigene79071  | Potri.001G136600.1 | 73.3558 | 208.9631 | -1.5103 | Down | 5.36E-94  | 1.06E-92  |
| Unigene16931  | Potri.017G042500.1 | 16.4021 | 46.73    | -1.5105 | Down | 4.12E-28  | 2.37E-27  |
| Unigene24801  | Potri.003G023300.1 | 29.4764 | 83.9826  | -1.5105 | Down | 5.13E-43  | 4.31E-42  |
| Unigene72132  | Potri.018G051500.2 | 11.2261 | 31.9921  | -1.5109 | Down | 9.83E-14  | 3.39E-13  |
| Unigene13613  | Potri.010G013700.1 | 4.3404  | 12.3693  | -1.5109 | Down | 4.67E-32  | 3.00E-31  |
| Unigene101571 | Potri.002G183600.1 | 4.6813  | 13.3408  | -1.5109 | Down | 1.51E-07  | 3.70E-07  |
| Unigene43951  | Potri.013G071800.2 | 16.6596 | 47.4795  | -1.511  | Down | 3.34E-81  | 5.56E-80  |
| Unigene86346  | Potri.005G223500.1 | 72.6098 | 206.9538 | -1.5111 | Down | 5.23E-116 | 1.35E-114 |
| Unigene4268   | Potri.019G021500.1 | 4.4316  | 12.6325  | -1.5112 | Down | 5.88E-11  | 1.77E-10  |
| Unigene94258  | Potri.006G199500.8 | 2.1623  | 6.1637   | -1.5112 | Down | 5.88E-11  | 1.77E-10  |
| Unigene41652  | Potri.016G029200.1 | 19.6859 | 56.1172  | -1.5113 | Down | 1.12E-42  | 9.36E-42  |
| Unigene8217   | Potri.011G077100.2 | 28.023  | 79.8846  | -1.5113 | Down | 6.36E-87  | 1.15E-85  |
| Unigene71072  | Potri.002G099800.1 | 47.4554 | 135.2769 | -1.5113 | Down | 4.40E-52  | 4.48E-51  |
| Unigene41243  | Potri.001G059900.3 | 40.2365 | 114.7019 | -1.5113 | Down | 2.04E-55  | 2.23E-54  |
| Unigene33137  | Potri.001G196700.1 | 24.7176 | 70.4683  | -1.5114 | Down | 5.14E-56  | 5.67E-55  |
| Unigene49041  | Potri.018G065500.1 | 6.4121  | 18.2813  | -1.5115 | Down | 1.04E-17  | 4.25E-17  |
| Unigene53312  | Potri.006G077800.1 | 19.4194 | 55.3663  | -1.5115 | Down | 7.38E-34  | 4.97E-33  |
| Unigene25269  | Potri.002G233500.4 | 11.5417 | 32.9064  | -1.5115 | Down | 1.04E-17  | 4.25E-17  |
| Unigene29770  | Potri.007G074800.1 | 18.5941 | 53.0205  | -1.5117 | Down | 1.85E-34  | 1.27E-33  |
| Unigene28768  | Potri.007G071100.4 | 31.668  | 90.2985  | -1.5117 | Down | 1.39E-86  | 2.49E-85  |
| Unigene9448   | Potri.019G030000.1 | 1.5428  | 4.3998   | -1.5119 | Down | 1.06E-04  | 2.03E-04  |
| Unigene26570  | Potri.014G108400.1 | 4.1309  | 11.7807  | -1.5119 | Down | 3.66E-08  | 9.37E-08  |
| Unigene20207  | Potri.010G129300.1 | 1.8014  | 5.1373   | -1.5119 | Down | 1.06E-04  | 2.03E-04  |
| Unigene52471  | Potri.010G015200.3 | 2.2974  | 6.5519   | -1.5119 | Down | 1.06E-04  | 2.03E-04  |
| Unigene20991  | Potri.006G098700.1 | 1.1529  | 3.2879   | -1.5119 | Down | 1.06E-04  | 2.03E-04  |
| Unigene113064 | Potri.006G075200.1 | 2.5364  | 7.2333   | -1.5119 | Down | 1.06E-04  | 2.03E-04  |
| Unigene18888  | Potri.005G137600.3 | 2.3704  | 6.7601   | -1.5119 | Down | 3.66E-08  | 9.37E-08  |
| Unigene44299  | Potri.003G161400.1 | 9.5046  | 27.1057  | -1.5119 | Down | 5.04E-25  | 2.64E-24  |
| Unigene107279 | Potri.002G169700.2 | 6.3409  | 18.0833  | -1.5119 | Down | 3.66E-08  | 9.37E-08  |
| Unigene13388  | Potri.002G132400.1 | 1.4122  | 4.0275   | -1.5119 | Down | 1.06E-04  | 2.03E-04  |

|               |                    |         |          |         |      |           |           |
|---------------|--------------------|---------|----------|---------|------|-----------|-----------|
| Unigene13935  | Potri.002G052300.2 | 26.224  | 74.7891  | -1.5119 | Down | 1.63E-145 | 5.60E-144 |
| Unigene118614 | Potri.001G360500.1 | 1.3725  | 3.9141   | -1.5119 | Down | 1.06E-04  | 2.03E-04  |
| Unigene3641   | Potri.001G024500.1 | 1.7812  | 5.0796   | -1.5119 | Down | 1.06E-04  | 2.03E-04  |
| Unigene32416  | Potri.018G047500.1 | 3.0378  | 8.6641   | -1.512  | Down | 2.43E-62  | 3.01E-61  |
| Unigene20901  | Potri.010G189900.5 | 1.2336  | 3.5182   | -1.512  | Down | 1.06E-04  | 2.03E-04  |
| Unigene24063  | Potri.016G000500.1 | 5.6111  | 16.0043  | -1.5121 | Down | 2.57E-32  | 1.66E-31  |
| Unigene74256  | Potri.004G235900.1 | 24.1146 | 68.7821  | -1.5121 | Down | 5.67E-29  | 3.35E-28  |
| Unigene43682  | Potri.013G147600.1 | 33.9884 | 96.9481  | -1.5122 | Down | 3.38E-70  | 4.76E-69  |
| Unigene15568  | Potri.004G155000.1 | 20.8741 | 59.5405  | -1.5122 | Down | 1.26E-25  | 6.73E-25  |
| Unigene8726   | Potri.001G306100.1 | 9.108   | 25.9802  | -1.5122 | Down | 2.83E-22  | 1.36E-21  |
| Unigene20706  | Potri.012G048400.1 | 5.1557  | 14.7087  | -1.5124 | Down | 7.37E-37  | 5.37E-36  |
| Unigene47944  | Potri.005G134600.1 | 30.8184 | 87.9229  | -1.5124 | Down | 1.80E-47  | 1.67E-46  |
| Unigene6631   | Potri.010G066000.1 | 5.8552  | 16.7049  | -1.5125 | Down | 3.56E-12  | 1.14E-11  |
| Unigene19397  | Potri.005G162300.1 | 18.5638 | 52.963   | -1.5125 | Down | 3.91E-44  | 3.36E-43  |
| Unigene13353  | Potri.014G018000.1 | 5.2774  | 15.0574  | -1.5126 | Down | 4.54E-48  | 4.26E-47  |
| Unigene11052  | Potri.012G065600.5 | 27.2811 | 77.8381  | -1.5126 | Down | 1.41E-140 | 4.63E-139 |
| Unigene22848  | Potri.011G057700.1 | 6.4164  | 18.3074  | -1.5126 | Down | 1.61E-19  | 7.03E-19  |
| Unigene50729  | Potri.013G082200.1 | 2.7492  | 7.8449   | -1.5127 | Down | 8.91E-09  | 2.37E-08  |
| Unigene12659  | Potri.007G022700.5 | 86.3541 | 246.4084 | -1.5127 | Down | 4.09E-301 | 3.64E-299 |
| Unigene13314  | Potri.008G149900.2 | 24.153  | 68.9242  | -1.5128 | Down | 8.52E-64  | 1.08E-62  |
| Unigene15196  | Potri.003G120400.1 | 12.1593 | 34.6974  | -1.5128 | Down | 3.71E-16  | 1.42E-15  |
| Unigene48414  | Potri.002G194000.4 | 14.9344 | 42.6183  | -1.5128 | Down | 5.37E-42  | 4.41E-41  |
| Unigene50946  | Potri.002G160500.6 | 10.2652 | 29.2947  | -1.5129 | Down | 1.98E-27  | 1.12E-26  |
| Unigene82449  | Potri.005G235900.1 | 8.1459  | 23.2489  | -1.513  | Down | 8.79E-13  | 2.90E-12  |
| Unigene49899  | Potri.005G183700.1 | 4.3319  | 12.3647  | -1.5132 | Down | 9.22E-17  | 3.62E-16  |
| Unigene32600  | Potri.006G267300.1 | 36.0661 | 102.9613 | -1.5134 | Down | 2.83E-145 | 9.70E-144 |
| Unigene78262  | Potri.010G051700.1 | 6.322   | 18.0493  | -1.5135 | Down | 2.17E-09  | 5.99E-09  |
| Unigene23265  | Potri.008G151300.1 | 2.1749  | 6.2094   | -1.5135 | Down | 2.17E-09  | 5.99E-09  |
| Unigene12974  | Potri.005G061800.2 | 2.1877  | 6.2458   | -1.5135 | Down | 2.17E-09  | 5.99E-09  |
| Unigene20855  | Potri.004G149500.1 | 5.2535  | 14.9987  | -1.5135 | Down | 2.17E-09  | 5.99E-09  |
| Unigene39136  | Potri.004G112400.1 | 1.5541  | 4.4371   | -1.5135 | Down | 2.48E-05  | 5.06E-05  |
| Unigene41907  | Potri.002G159200.1 | 2.7527  | 7.8591   | -1.5135 | Down | 2.48E-05  | 5.06E-05  |
| Unigene40628  | Potri.002G021700.1 | 12.5906 | 35.9463  | -1.5135 | Down | 2.29E-17  | 9.23E-17  |
| Unigene52245  | Potri.001G241500.2 | 15.9476 | 45.5305  | -1.5135 | Down | 4.05E-37  | 2.97E-36  |
| Unigene91038  | Potri.012G101600.1 | 35.4485 | 101.2109 | -1.5136 | Down | 4.90E-77  | 7.70E-76  |
| Unigene53114  | Potri.004G099100.1 | 13.7594 | 39.2922  | -1.5138 | Down | 5.70E-18  | 2.35E-17  |
| Unigene29259  | Potri.001G243500.1 | 14.7365 | 42.0843  | -1.5139 | Down | 7.43E-43  | 6.22E-42  |
| Unigene53281  | Potri.001G057400.3 | 7.9388  | 22.6721  | -1.5139 | Down | 5.37E-14  | 1.87E-13  |
| Unigene42746  | Potri.017G078900.1 | 12.0456 | 34.4032  | -1.514  | Down | 3.20E-81  | 5.33E-80  |

|               |                    |         |          |         |      |           |           |
|---------------|--------------------|---------|----------|---------|------|-----------|-----------|
| Unigene8107   | Potri.014G107600.1 | 5.0998  | 14.5663  | -1.5141 | Down | 1.42E-18  | 5.99E-18  |
| Unigene9724   | Potri.007G002800.3 | 31.422  | 89.747   | -1.5141 | Down | 1.88E-56  | 2.09E-55  |
| Unigene30363  | Potri.005G051200.2 | 20.6508 | 58.9843  | -1.5141 | Down | 4.34E-27  | 2.42E-26  |
| Unigene29952  | Potri.004G230800.1 | 13.7672 | 39.3229  | -1.5141 | Down | 1.42E-18  | 5.99E-18  |
| Unigene9534   | Potri.002G057800.1 | 3.6123  | 10.3178  | -1.5141 | Down | 5.32E-10  | 1.52E-09  |
| Unigene6318   | Potri.015G079400.3 | 17.2273 | 49.2098  | -1.5142 | Down | 3.89E-23  | 1.92E-22  |
| Unigene31899  | Potri.001G229600.1 | 10.1348 | 28.949   | -1.5142 | Down | 8.39E-117 | 2.18E-115 |
| Unigene32223  | Potri.010G232500.1 | 6.255   | 17.8686  | -1.5143 | Down | 3.11E-71  | 4.45E-70  |
| Unigene25390  | Potri.006G153700.1 | 54.5847 | 155.9382 | -1.5144 | Down | 8.65E-120 | 2.33E-118 |
| Unigene5096   | Potri.002G042000.1 | 14.3708 | 41.055   | -1.5144 | Down | 3.53E-19  | 1.53E-18  |
| Unigene88362  | Potri.017G044600.4 | 25.166  | 71.8976  | -1.5145 | Down | 7.49E-46  | 6.70E-45  |
| Unigene30964  | Potri.009G122800.1 | 2.6726  | 7.6364   | -1.5146 | Down | 5.89E-06  | 1.27E-05  |
| Unigene38800  | Potri.018G150100.3 | 2.4652  | 7.044    | -1.5147 | Down | 5.89E-06  | 1.27E-05  |
| Unigene4146   | Potri.017G075600.1 | 3.3775  | 9.6508   | -1.5147 | Down | 5.89E-06  | 1.27E-05  |
| Unigene8712   | Potri.016G059900.2 | 3.1971  | 9.1353   | -1.5147 | Down | 3.30E-15  | 1.21E-14  |
| Unigene17233  | Potri.014G133400.6 | 1.9587  | 5.5966   | -1.5147 | Down | 5.89E-06  | 1.27E-05  |
| Unigene70173  | Potri.011G089700.4 | 3.3446  | 9.5567   | -1.5147 | Down | 8.81E-20  | 3.89E-19  |
| Unigene86606  | Potri.004G196300.1 | 2.822   | 8.0635   | -1.5147 | Down | 5.89E-06  | 1.27E-05  |
| Unigene19407  | Potri.004G126800.2 | 2.9081  | 8.3095   | -1.5147 | Down | 5.89E-06  | 1.27E-05  |
| Unigene23362  | Potri.003G023300.1 | 21.8444 | 62.4173  | -1.5147 | Down | 1.39E-51  | 1.41E-50  |
| Unigene45058  | Potri.005G062900.1 | 7.7793  | 22.232   | -1.5149 | Down | 3.54E-39  | 2.72E-38  |
| Unigene549    | Potri.001G319500.1 | 13.3761 | 38.226   | -1.5149 | Down | 5.75E-67  | 7.72E-66  |
| Unigene6102   | Potri.005G221100.1 | 9.2606  | 26.4668  | -1.515  | Down | 8.18E-16  | 3.09E-15  |
| Unigene11850  | Potri.001G403600.2 | 10.8727 | 31.0744  | -1.515  | Down | 2.59E-44  | 2.23E-43  |
| Unigene71887  | Potri.008G099700.1 | 30.9313 | 88.4075  | -1.5151 | Down | 3.08E-35  | 2.14E-34  |
| Unigene71450  | Potri.014G073300.1 | 9.0033  | 25.7344  | -1.5152 | Down | 3.20E-11  | 9.78E-11  |
| Unigene39095  | Potri.010G094700.1 | 37.0942 | 106.03   | -1.5152 | Down | 1.55E-108 | 3.67E-107 |
| Unigene86691  | Potri.005G054500.1 | 5.9924  | 17.1281  | -1.5152 | Down | 3.20E-11  | 9.78E-11  |
| Unigene113471 | Potri.008G119100.1 | 47.2461 | 135.0538 | -1.5153 | Down | 1.98E-65  | 2.59E-64  |
| Unigene30545  | Potri.010G029400.1 | 2.6282  | 7.5143   | -1.5156 | Down | 1.41E-06  | 3.20E-06  |
| Unigene49455  | Potri.003G065800.2 | 3.4759  | 9.9383   | -1.5156 | Down | 1.41E-06  | 3.20E-06  |
| Unigene118996 | Potri.002G032300.1 | 1.7893  | 5.1158   | -1.5156 | Down | 1.41E-06  | 3.20E-06  |
| Unigene48358  | Potri.001G092500.1 | 34.8845 | 99.7403  | -1.5156 | Down | 4.86E-53  | 5.05E-52  |
| Unigene41719  | Potri.006G228100.3 | 35.5761 | 101.7229 | -1.5157 | Down | 9.09E-59  | 1.06E-57  |
| Unigene32368  | Potri.001G264800.1 | 7.7138  | 22.0563  | -1.5157 | Down | 1.65E-48  | 1.57E-47  |
| Unigene647    | Potri.018G146800.1 | 5.0906  | 14.5569  | -1.5158 | Down | 8.53E-23  | 4.16E-22  |
| Unigene50158  | Potri.003G183900.2 | 8.1367  | 23.2673  | -1.5158 | Down | 3.49E-86  | 6.23E-85  |
| Unigene23002  | Potri.012G023200.5 | 9.2283  | 26.3911  | -1.5159 | Down | 1.94E-39  | 1.50E-38  |
| Unigene18071  | Potri.016G001300.1 | 3.2615  | 9.3276   | -1.516  | Down | 1.94E-12  | 6.30E-12  |

|               |                    |         |          |         |      |           |           |
|---------------|--------------------|---------|----------|---------|------|-----------|-----------|
| Unigene44309  | Potri.008G180000.1 | 15.5415 | 44.4473  | -1.516  | Down | 4.93E-56  | 5.44E-55  |
| Unigene2403   | Potri.003G026800.3 | 7.0734  | 20.2301  | -1.516  | Down | 4.89E-40  | 3.84E-39  |
| Unigene79866  | Potri.002G054400.1 | 17.2035 | 49.2064  | -1.5161 | Down | 5.33E-24  | 2.70E-23  |
| Unigene115392 | Potri.018G086000.2 | 29.6583 | 84.8354  | -1.5162 | Down | 5.70E-47  | 5.23E-46  |
| Unigene110413 | Potri.005G213300.4 | 23.7513 | 67.9364  | -1.5162 | Down | 9.40E-30  | 5.66E-29  |
| Unigene4316   | Potri.001G117900.1 | 44.7409 | 127.9713 | -1.5162 | Down | 1.10E-96  | 2.26E-95  |
| Unigene25780  | Potri.009G111200.7 | 11.9744 | 34.2538  | -1.5163 | Down | 7.77E-19  | 3.31E-18  |
| Unigene42752  | Potri.006G159700.1 | 7.3855  | 21.1268  | -1.5163 | Down | 3.38E-76  | 5.24E-75  |
| Unigene40636  | Potri.004G113600.1 | 6.0094  | 17.1903  | -1.5163 | Down | 4.80E-13  | 1.60E-12  |
| Unigene40357  | Potri.001G032400.1 | 11.8867 | 34.0029  | -1.5163 | Down | 7.77E-19  | 3.31E-18  |
| Unigene17387  | Potri.010G160500.1 | 55.4016 | 158.5049 | -1.5165 | Down | 2.38E-191 | 1.17E-189 |
| Unigene80665  | Potri.006G015100.1 | 9.1376  | 26.1446  | -1.5166 | Down | 1.19E-13  | 4.07E-13  |
| Unigene79463  | Potri.008G011300.1 | 43.9272 | 125.7033 | -1.5168 | Down | 4.34E-58  | 4.98E-57  |
| Unigene89931  | Potri.008G170300.1 | 9.7303  | 27.8457  | -1.5169 | Down | 1.20E-20  | 5.48E-20  |
| Unigene5821   | Potri.008G142500.1 | 27.852  | 79.7095  | -1.517  | Down | 1.25E-46  | 1.13E-45  |
| Unigene34192  | Potri.010G186700.1 | 5.5114  | 15.7742  | -1.5171 | Down | 3.00E-21  | 1.39E-20  |
| Unigene47290  | Potri.003G061700.2 | 6.3728  | 18.2415  | -1.5172 | Down | 7.50E-22  | 3.55E-21  |
| Unigene22119  | Potri.012G066200.1 | 19.2402 | 55.0769  | -1.5173 | Down | 1.49E-56  | 1.66E-55  |
| Unigene112230 | Potri.006G203000.7 | 21.2918 | 60.9476  | -1.5173 | Down | 8.22E-29  | 4.82E-28  |
| Unigene7180   | Potri.018G024700.1 | 8.2365  | 23.5787  | -1.5174 | Down | 1.80E-15  | 6.70E-15  |
| Unigene48416  | Potri.003G151700.1 | 25.5977 | 73.2789  | -1.5174 | Down | 2.34E-36  | 1.68E-35  |
| Unigene44719  | Potri.002G187100.2 | 12.1683 | 34.8343  | -1.5174 | Down | 3.17E-50  | 3.11E-49  |
| Unigene21594  | Potri.010G052600.2 | 13.0031 | 37.2283  | -1.5175 | Down | 6.02E-59  | 7.03E-58  |
| Unigene33329  | Potri.018G023200.1 | 2.9247  | 8.3737   | -1.5176 | Down | 4.47E-16  | 1.71E-15  |
| Unigene11402  | Potri.007G106300.1 | 2.7448  | 7.8588   | -1.5176 | Down | 4.47E-16  | 1.71E-15  |
| Unigene451    | Potri.004G126100.1 | 21.6674 | 62.0366  | -1.5176 | Down | 2.05E-88  | 3.76E-87  |
| Unigene3739   | Potri.004G009600.1 | 30.8602 | 88.3551  | -1.5176 | Down | 5.07E-52  | 5.16E-51  |
| Unigene34320  | Potri.003G003500.2 | 9.572   | 27.4066  | -1.5176 | Down | 3.70E-38  | 2.78E-37  |
| Unigene108925 | Potri.002G080600.2 | 12.9046 | 36.9475  | -1.5176 | Down | 4.47E-16  | 1.71E-15  |
| Unigene4414   | Potri.001G398800.2 | 23.0751 | 66.0672  | -1.5176 | Down | 1.29E-30  | 7.99E-30  |
| Unigene7613   | Potri.018G107300.1 | 2.7792  | 7.9582   | -1.5178 | Down | 4.84E-09  | 1.31E-08  |
| Unigene16549  | Potri.018G036600.1 | 4.0965  | 11.7304  | -1.5178 | Down | 4.84E-09  | 1.31E-08  |
| Unigene23149  | Potri.002G047800.1 | 5.9181  | 16.9466  | -1.5178 | Down | 1.11E-16  | 4.35E-16  |
| Unigene32585  | Potri.010G134200.4 | 9.153   | 26.2111  | -1.5179 | Down | 3.59E-78  | 5.74E-77  |
| Unigene13419  | Potri.005G083100.4 | 29.0356 | 83.1548  | -1.518  | Down | 9.75E-182 | 4.50E-180 |
| Unigene44826  | Potri.002G160900.4 | 5.8466  | 16.7438  | -1.518  | Down | 2.76E-17  | 1.11E-16  |
| Unigene71050  | Potri.015G069700.1 | 15.1414 | 43.3682  | -1.5181 | Down | 6.87E-18  | 2.83E-17  |
| Unigene34529  | Potri.005G049100.3 | 7.3593  | 21.0775  | -1.5181 | Down | 1.29E-33  | 8.60E-33  |
| Unigene57     | Potri.001G358900.1 | 9.1094  | 26.0922  | -1.5182 | Down | 1.78E-108 | 4.21E-107 |



|               |                    |         |          |         |      |           |           |
|---------------|--------------------|---------|----------|---------|------|-----------|-----------|
| Unigene19625  | Potri.008G160800.1 | 9.8157  | 28.1172  | -1.5183 | Down | 1.71E-18  | 7.20E-18  |
| Unigene27898  | Potri.015G141400.1 | 5.5073  | 15.7774  | -1.5184 | Down | 4.26E-19  | 1.83E-18  |
| Unigene2334   | Potri.009G138200.1 | 8.2265  | 23.5673  | -1.5184 | Down | 4.26E-19  | 1.83E-18  |
| Unigene27306  | Potri.001G244400.1 | 6.8099  | 19.509   | -1.5184 | Down | 2.89E-10  | 8.38E-10  |
| Unigene79516  | Potri.018G115500.1 | 54.9516 | 157.4334 | -1.5185 | Down | 1.04E-72  | 1.53E-71  |
| Unigene49218  | Potri.017G054600.1 | 3.6149  | 10.3561  | -1.5185 | Down | 2.89E-10  | 8.38E-10  |
| Unigene35686  | Potri.017G114400.1 | 16.3186 | 46.7539  | -1.5186 | Down | 1.06E-19  | 4.67E-19  |
| Unigene27776  | Potri.008G012600.4 | 24.8302 | 71.1418  | -1.5186 | Down | 3.77E-47  | 3.48E-46  |
| Unigene1538   | Potri.001G213900.1 | 26.5227 | 75.9904  | -1.5186 | Down | 3.26E-83  | 5.57E-82  |
| Unigene11759  | Potri.012G061900.1 | 3.734   | 10.6988  | -1.5187 | Down | 4.52E-57  | 5.09E-56  |
| Unigene32612  | Potri.002G114200.1 | 5.5609  | 15.9339  | -1.5187 | Down | 5.12E-39  | 3.92E-38  |
| Unigene23864  | Potri.012G034200.1 | 20.1582 | 57.7662  | -1.5189 | Down | 7.11E-31  | 4.42E-30  |
| Unigene19752  | Potri.008G030100.1 | 7.4599  | 21.3785  | -1.5189 | Down | 1.75E-11  | 5.40E-11  |
| Unigene33860  | Potri.004G043200.5 | 21.0138 | 60.2212  | -1.5189 | Down | 2.04E-41  | 1.66E-40  |
| Unigene29608  | Potri.003G087200.1 | 15.1194 | 43.3273  | -1.5189 | Down | 8.13E-41  | 6.50E-40  |
| Unigene48819  | Potri.002G245300.1 | 4.072   | 11.6695  | -1.5189 | Down | 1.75E-11  | 5.40E-11  |
| Unigene61529  | Potri.007G077500.1 | 11.4378 | 32.7795  | -1.519  | Down | 5.14E-42  | 4.22E-41  |
| Unigene18081  | Potri.010G045600.1 | 6.5577  | 18.7951  | -1.5191 | Down | 3.60E-95  | 7.24E-94  |
| Unigene43056  | Potri.008G153900.1 | 7.8983  | 22.6373  | -1.5191 | Down | 3.25E-43  | 2.74E-42  |
| Unigene4680   | Potri.001G399000.1 | 28.6504 | 82.1176  | -1.5191 | Down | 2.82E-33  | 1.87E-32  |
| Unigene51761  | Potri.005G091200.1 | 18.2316 | 52.2588  | -1.5192 | Down | 5.18E-45  | 4.54E-44  |
| Unigene7906   | Potri.001G254300.1 | 2.5707  | 7.3682   | -1.5192 | Down | 4.30E-12  | 1.37E-11  |
| Unigene53554  | Potri.009G131200.1 | 9.8527  | 28.2434  | -1.5193 | Down | 1.06E-12  | 3.48E-12  |
| Unigene43493  | Potri.005G103300.2 | 10.7117 | 30.7056  | -1.5193 | Down | 1.20E-90  | 2.27E-89  |
| Unigene10827  | Potri.010G235700.1 | 8.1912  | 23.4822  | -1.5194 | Down | 2.50E-105 | 5.67E-104 |
| Unigene34839  | Potri.014G117500.2 | 8.6869  | 24.9043  | -1.5195 | Down | 7.06E-37  | 5.14E-36  |
| Unigene86448  | Potri.013G073100.1 | 7.3112  | 20.9604  | -1.5195 | Down | 2.62E-13  | 8.86E-13  |
| Unigene39027  | Potri.009G074800.2 | 6.7713  | 19.4125  | -1.5195 | Down | 2.62E-13  | 8.86E-13  |
| Unigene113155 | Potri.001G004800.1 | 8.7676  | 25.1358  | -1.5195 | Down | 2.62E-13  | 8.86E-13  |
| Unigene8354   | Potri.017G057800.1 | 4.001   | 11.4716  | -1.5196 | Down | 6.48E-14  | 2.25E-13  |
| Unigene38768  | Potri.017G051600.3 | 12.5004 | 35.8409  | -1.5196 | Down | 2.51E-26  | 1.37E-25  |
| Unigene12843  | Potri.011G104000.1 | 7.3299  | 21.016   | -1.5196 | Down | 2.51E-26  | 1.37E-25  |
| Unigene38036  | Potri.011G000100.9 | 21.7506 | 62.3597  | -1.5196 | Down | 8.33E-50  | 8.11E-49  |
| Unigene49620  | Potri.007G112700.1 | 20.8579 | 59.802   | -1.5196 | Down | 1.02E-62  | 1.27E-61  |
| Unigene36995  | Potri.001G280600.1 | 14.2682 | 40.9114  | -1.5197 | Down | 6.29E-27  | 3.49E-26  |
| Unigene31170  | Potri.012G048400.1 | 9.5769  | 27.4625  | -1.5198 | Down | 3.95E-28  | 2.27E-27  |
| Unigene46118  | Potri.010G110000.1 | 15.1529 | 43.4503  | -1.5198 | Down | 1.58E-27  | 8.90E-27  |
| Unigene18820  | Potri.007G138700.1 | 4.6895  | 13.4469  | -1.5198 | Down | 1.60E-14  | 5.72E-14  |
| Unigene42558  | Potri.006G015700.2 | 10.0531 | 28.8267  | -1.5198 | Down | 3.30E-79  | 5.37E-78  |

|              |                    |         |          |         |      |           |           |
|--------------|--------------------|---------|----------|---------|------|-----------|-----------|
| Unigene92909 | Potri.003G115800.2 | 9.8309  | 28.1919  | -1.5199 | Down | 9.89E-29  | 5.79E-28  |
| Unigene12866 | Potri.005G179700.1 | 13.4586 | 38.5971  | -1.52   | Down | 1.79E-43  | 1.52E-42  |
| Unigene35576 | Potri.019G120100.1 | 25.4393 | 72.963   | -1.5201 | Down | 1.39E-60  | 1.67E-59  |
| Unigene28012 | Potri.005G242000.1 | 23.1405 | 66.3682  | -1.5201 | Down | 2.85E-45  | 2.51E-44  |
| Unigene23974 | Potri.001G305800.1 | 7.6143  | 21.8386  | -1.5201 | Down | 3.90E-31  | 2.45E-30  |
| Unigene11701 | Potri.T034000.2    | 6.9991  | 20.0769  | -1.5203 | Down | 1.82E-49  | 1.76E-48  |
| Unigene13221 | Potri.010G222400.1 | 3.1948  | 9.1643   | -1.5203 | Down | 1.51E-17  | 6.13E-17  |
| Unigene91760 | Potri.001G197900.2 | 47.2859 | 135.6366 | -1.5203 | Down | 8.02E-112 | 1.98E-110 |
| Unigene872   | Potri.001G454600.1 | 1.9465  | 5.584    | -1.5204 | Down | 9.36E-19  | 3.98E-18  |
| Unigene24113 | Potri.009G002000.1 | 5.2498  | 15.0616  | -1.5205 | Down | 9.74E-38  | 7.24E-37  |
| Unigene30970 | Potri.002G137000.4 | 15.3849 | 44.1363  | -1.5205 | Down | 6.15E-36  | 4.37E-35  |
| Unigene2942  | Potri.005G117900.2 | 9.0065  | 25.8423  | -1.5207 | Down | 3.97E-79  | 6.44E-78  |
| Unigene32970 | Potri.010G176300.1 | 5.0183  | 14.4001  | -1.5208 | Down | 2.25E-22  | 1.08E-21  |
| Unigene25652 | Potri.001G374700.1 | 2.8949  | 8.3069   | -1.5208 | Down | 2.25E-22  | 1.08E-21  |
| Unigene12826 | Potri.015G011100.1 | 7.7959  | 22.3734  | -1.521  | Down | 6.28E-48  | 5.88E-47  |
| Unigene16373 | Potri.014G088100.1 | 18.3005 | 52.5267  | -1.5212 | Down | 8.65E-28  | 4.92E-27  |
| Unigene20404 | Potri.011G072400.1 | 16.452  | 47.221   | -1.5212 | Down | 8.65E-28  | 4.92E-27  |
| Unigene23602 | Potri.003G066200.1 | 3.9832  | 11.4333  | -1.5212 | Down | 1.36E-29  | 8.17E-29  |
| Unigene21951 | Potri.003G081600.2 | 34.7714 | 99.8135  | -1.5213 | Down | 1.44E-179 | 6.52E-178 |
| Unigene31962 | Potri.006G119600.1 | 6.8594  | 19.6912  | -1.5214 | Down | 2.44E-126 | 6.97E-125 |
| Unigene7224  | Potri.011G132500.1 | 13.7914 | 39.5942  | -1.5215 | Down | 8.49E-37  | 6.17E-36  |
| Unigene13075 | Potri.015G128300.1 | 36.3354 | 104.3257 | -1.5216 | Down | 8.07E-122 | 2.22E-120 |
| Unigene506   | Potri.006G111800.1 | 12.9924 | 37.3011  | -1.5216 | Down | 2.90E-74  | 4.36E-73  |
| Unigene43083 | Potri.014G112600.1 | 7.4805  | 21.4789  | -1.5217 | Down | 3.42E-45  | 3.01E-44  |
| Unigene92671 | Potri.010G004700.2 | 17.3311 | 49.7647  | -1.5218 | Down | 1.37E-47  | 1.27E-46  |
| Unigene36043 | Potri.003G155400.1 | 25.1302 | 72.1628  | -1.5218 | Down | 2.22E-52  | 2.27E-51  |
| Unigene90034 | Potri.009G159200.2 | 62.9367 | 180.7793 | -1.5223 | Down | 1.61E-126 | 4.62E-125 |
| Unigene99628 | Potri.T098600.1    | 3.8809  | 11.1497  | -1.5225 | Down | 1.08E-08  | 2.85E-08  |
| Unigene33211 | Potri.017G114400.1 | 6.6961  | 19.2376  | -1.5225 | Down | 1.19E-28  | 6.94E-28  |
| Unigene17722 | Potri.017G072800.2 | 18.5516 | 53.2983  | -1.5225 | Down | 1.86E-39  | 1.44E-38  |
| Unigene13925 | Potri.016G102200.1 | 3.8586  | 11.0856  | -1.5225 | Down | 7.57E-27  | 4.19E-26  |
| Unigene38108 | Potri.016G043900.1 | 2.1     | 6.0332   | -1.5225 | Down | 1.33E-05  | 2.79E-05  |
| Unigene54453 | Potri.016G014000.2 | 2.4788  | 7.1214   | -1.5225 | Down | 1.33E-05  | 2.79E-05  |
| Unigene36388 | Potri.015G095700.2 | 1.2745  | 3.6615   | -1.5225 | Down | 2.42E-04  | 4.44E-04  |
| Unigene34659 | Potri.015G067200.1 | 4.1257  | 11.853   | -1.5225 | Down | 4.70E-31  | 2.93E-30  |
| Unigene67232 | Potri.014G120900.1 | 1.1349  | 3.2605   | -1.5225 | Down | 2.42E-04  | 4.44E-04  |
| Unigene15703 | Potri.014G110500.2 | 1.4088  | 4.0474   | -1.5225 | Down | 1.33E-05  | 2.79E-05  |
| Unigene48341 | Potri.014G069400.1 | 11.9706 | 34.3911  | -1.5225 | Down | 2.17E-15  | 8.05E-15  |
| Unigene16655 | Potri.013G139100.1 | 1.0657  | 3.0617   | -1.5225 | Down | 5.64E-05  | 1.11E-04  |

|               |                    |         |          |         |      |          |          |
|---------------|--------------------|---------|----------|---------|------|----------|----------|
| Unigene16110  | Potri.013G124700.1 | 2.8692  | 8.2431   | -1.5225 | Down | 5.64E-05 | 1.11E-04 |
| Unigene8214   | Potri.013G081300.6 | 2.9741  | 8.5444   | -1.5225 | Down | 3.87E-11 | 1.18E-10 |
| Unigene50993  | Potri.012G037300.1 | 1.9911  | 5.7203   | -1.5225 | Down | 2.42E-04 | 4.44E-04 |
| Unigene47175  | Potri.011G165100.2 | 19.6157 | 56.3553  | -1.5225 | Down | 1.95E-54 | 2.08E-53 |
| Unigene26071  | Potri.009G158600.2 | 9.712   | 27.9022  | -1.5225 | Down | 2.17E-15 | 8.05E-15 |
| Unigene119407 | Potri.009G139900.1 | 1.7856  | 5.13     | -1.5225 | Down | 1.08E-08 | 2.85E-08 |
| Unigene50497  | Potri.008G105400.1 | 1.9926  | 5.7246   | -1.5225 | Down | 5.79E-13 | 1.92E-12 |
| Unigene45540  | Potri.008G078500.2 | 7.5829  | 21.7854  | -1.5225 | Down | 4.73E-46 | 4.25E-45 |
| Unigene53586  | Potri.008G028800.3 | 3.0798  | 8.8481   | -1.5225 | Down | 5.64E-05 | 1.11E-04 |
| Unigene242    | Potri.007G026300.1 | 7.1552  | 20.5566  | -1.5225 | Down | 7.48E-45 | 6.53E-44 |
| Unigene31611  | Potri.006G142800.1 | 16.845  | 48.3951  | -1.5225 | Down | 7.57E-27 | 4.19E-26 |
| Unigene95678  | Potri.006G044100.1 | 3.7389  | 10.7416  | -1.5225 | Down | 6.43E-10 | 1.83E-09 |
| Unigene9838   | Potri.005G213400.3 | 1.8225  | 5.2359   | -1.5225 | Down | 2.42E-04 | 4.44E-04 |
| Unigene9144   | Potri.005G135100.1 | 3.0642  | 8.8032   | -1.5225 | Down | 8.28E-18 | 3.39E-17 |
| Unigene18257  | Potri.005G046700.4 | 10.7113 | 30.7732  | -1.5225 | Down | 7.47E-30 | 4.52E-29 |
| Unigene28084  | Potri.004G224000.3 | 24.3472 | 69.9488  | -1.5225 | Down | 5.07E-61 | 6.13E-60 |
| Unigene2947   | Potri.004G161800.3 | 1.5456  | 4.4404   | -1.5225 | Down | 1.83E-07 | 4.45E-07 |
| Unigene6882   | Potri.003G219300.1 | 2.1069  | 6.053    | -1.5225 | Down | 7.60E-07 | 1.77E-06 |
| Unigene42200  | Potri.002G238300.1 | 11.0733 | 31.8133  | -1.5225 | Down | 1.93E-24 | 9.93E-24 |
| Unigene39863  | Potri.002G235900.1 | 24.6403 | 70.7909  | -1.5225 | Down | 5.26E-67 | 7.06E-66 |
| Unigene41994  | Potri.002G011100.1 | 4.6274  | 13.2944  | -1.5225 | Down | 4.43E-08 | 1.13E-07 |
| Unigene26147  | Potri.002G000300.4 | 5.0446  | 14.493   | -1.5225 | Down | 4.43E-08 | 1.13E-07 |
| Unigene102562 | Potri.001G392600.2 | 2.6485  | 7.609    | -1.5225 | Down | 3.17E-06 | 7.00E-06 |
| Unigene12347  | Potri.017G152600.1 | 9.5849  | 27.5373  | -1.5226 | Down | 1.89E-27 | 1.07E-26 |
| Unigene44051  | Potri.015G146600.4 | 3.4382  | 9.8779   | -1.5226 | Down | 4.43E-08 | 1.13E-07 |
| Unigene38237  | Potri.015G049600.1 | 1.5541  | 4.465    | -1.5226 | Down | 1.08E-08 | 2.85E-08 |
| Unigene58076  | Potri.014G084500.1 | 1.6415  | 4.7161   | -1.5226 | Down | 5.64E-05 | 1.11E-04 |
| Unigene103292 | Potri.010G092100.1 | 1.7127  | 4.9206   | -1.5226 | Down | 2.35E-12 | 7.57E-12 |
| Unigene48480  | Potri.009G164200.1 | 2.7743  | 7.9706   | -1.5226 | Down | 7.60E-07 | 1.77E-06 |
| Unigene19902  | Potri.009G121100.1 | 1.9095  | 5.486    | -1.5226 | Down | 1.58E-10 | 4.63E-10 |
| Unigene50759  | Potri.009G079900.1 | 2.2342  | 6.4189   | -1.5226 | Down | 1.08E-08 | 2.85E-08 |
| Unigene102783 | Potri.002G079100.1 | 2.7544  | 7.9134   | -1.5226 | Down | 3.17E-06 | 7.00E-06 |
| Unigene35468  | Potri.002G028100.1 | 1.704   | 4.8957   | -1.5226 | Down | 5.64E-05 | 1.11E-04 |
| Unigene34128  | Potri.001G273100.1 | 2.3032  | 6.6171   | -1.5226 | Down | 1.08E-08 | 2.85E-08 |
| Unigene77607  | Potri.001G197600.3 | 2.8939  | 8.3142   | -1.5226 | Down | 5.64E-05 | 1.11E-04 |
| Unigene118826 | Potri.001G075700.4 | 1.5697  | 4.5098   | -1.5226 | Down | 1.33E-05 | 2.79E-05 |
| Unigene12106  | Potri.003G105000.5 | 36.2545 | 104.1871 | -1.5229 | Down | 8.78E-92 | 1.68E-90 |
| Unigene43344  | Potri.016G001400.1 | 11.4074 | 32.7844  | -1.523  | Down | 4.84E-75 | 7.37E-74 |
| Unigene2059   | Potri.008G204000.1 | 9.1215  | 26.2147  | -1.523  | Down | 1.22E-75 | 1.87E-74 |

|               |                    |         |          |         |      |           |           |
|---------------|--------------------|---------|----------|---------|------|-----------|-----------|
| Unigene21475  | Potri.017G059300.1 | 6.6225  | 19.0339  | -1.5231 | Down | 1.13E-63  | 1.43E-62  |
| Unigene4954   | Potri.001G415700.1 | 27.3982 | 78.763   | -1.5234 | Down | 4.08E-42  | 3.37E-41  |
| Unigene86435  | Potri.013G085600.3 | 22.8011 | 65.5513  | -1.5235 | Down | 1.62E-38  | 1.22E-37  |
| Unigene23930  | Potri.005G091200.1 | 17.5475 | 50.4453  | -1.5235 | Down | 1.62E-41  | 1.32E-40  |
| Unigene38717  | Potri.005G046700.4 | 14.9375 | 42.9467  | -1.5236 | Down | 1.62E-35  | 1.14E-34  |
| Unigene23239  | Potri.002G237800.1 | 14.8069 | 42.5711  | -1.5236 | Down | 6.44E-70  | 9.04E-69  |
| Unigene29007  | Potri.014G185300.1 | 3.6704  | 10.554   | -1.5238 | Down | 2.58E-31  | 1.62E-30  |
| Unigene17176  | Potri.007G049800.1 | 16.1413 | 46.4127  | -1.5238 | Down | 2.58E-31  | 1.62E-30  |
| Unigene87421  | Potri.001G123800.3 | 65.2742 | 187.7005 | -1.5238 | Down | 2.79E-112 | 6.90E-111 |
| Unigene94556  | Potri.009G088200.2 | 21.5509 | 61.9745  | -1.5239 | Down | 1.04E-27  | 5.91E-27  |
| Unigene25154  | Potri.019G034300.2 | 19.4141 | 55.8311  | -1.524  | Down | 4.15E-27  | 2.32E-26  |
| Unigene35575  | Potri.010G098200.2 | 27.2618 | 78.4042  | -1.5241 | Down | 1.45E-49  | 1.40E-48  |
| Unigene3467   | Potri.008G125700.1 | 19.4305 | 55.8855  | -1.5242 | Down | 4.23E-24  | 2.16E-23  |
| Unigene23673  | Potri.008G114200.1 | 24.6706 | 70.9569  | -1.5242 | Down | 5.57E-69  | 7.71E-68  |
| Unigene3001   | Potri.006G127100.3 | 13.3385 | 38.3645  | -1.5242 | Down | 5.69E-46  | 5.10E-45  |
| Unigene86698  | Potri.001G403100.1 | 26.2931 | 75.6272  | -1.5242 | Down | 8.99E-45  | 7.84E-44  |
| Unigene43040  | Potri.012G087700.1 | 3.4958  | 10.0554  | -1.5243 | Down | 2.71E-22  | 1.30E-21  |
| Unigene34716  | Potri.009G040200.1 | 6.2068  | 17.8531  | -1.5243 | Down | 6.78E-23  | 3.32E-22  |
| Unigene113257 | Potri.017G106300.1 | 14.3574 | 41.3015  | -1.5244 | Down | 4.35E-21  | 2.01E-20  |
| Unigene10408  | Potri.012G011300.1 | 34.3764 | 98.8884  | -1.5244 | Down | 1.33E-60  | 1.60E-59  |
| Unigene33636  | Potri.002G151800.1 | 13.7004 | 39.4124  | -1.5244 | Down | 5.62E-40  | 4.40E-39  |
| Unigene1888   | Potri.011G002400.1 | 14.2019 | 40.8578  | -1.5245 | Down | 3.54E-38  | 2.66E-37  |
| Unigene22435  | Potri.015G062800.1 | 7.4094  | 21.3172  | -1.5246 | Down | 5.60E-37  | 4.09E-36  |
| Unigene30392  | Potri.008G143700.1 | 28.3607 | 81.5961  | -1.5246 | Down | 1.24E-71  | 1.79E-70  |
| Unigene44178  | Potri.006G076900.1 | 51.0485 | 146.8839 | -1.5247 | Down | 6.65E-232 | 4.13E-230 |
| Unigene16388  | Potri.006G025600.2 | 36.5739 | 105.2321 | -1.5247 | Down | 3.20E-52  | 3.27E-51  |
| Unigene34356  | Potri.008G199300.1 | 3.5597  | 10.2428  | -1.5248 | Down | 5.61E-34  | 3.79E-33  |
| Unigene81563  | Potri.005G154900.1 | 46.2222 | 133.0052 | -1.5248 | Down | 4.73E-65  | 6.15E-64  |
| Unigene45704  | Potri.001G123800.1 | 8.1152  | 23.3509  | -1.5248 | Down | 5.61E-34  | 3.79E-33  |
| Unigene67565  | Potri.TI61200.1    | 22.3221 | 64.2343  | -1.5249 | Down | 8.91E-33  | 5.84E-32  |
| Unigene94663  | Potri.018G037800.2 | 2.6127  | 7.5185   | -1.5249 | Down | 7.32E-17  | 2.89E-16  |
| Unigene37522  | Potri.017G149800.1 | 40.2216 | 115.7408 | -1.5249 | Down | 1.26E-48  | 1.19E-47  |
| Unigene45640  | Potri.016G137200.1 | 15.2589 | 43.9115  | -1.5249 | Down | 7.87E-47  | 7.19E-46  |
| Unigene68350  | Potri.011G121200.2 | 3.5425  | 10.194   | -1.5249 | Down | 8.91E-33  | 5.84E-32  |
| Unigene17785  | Potri.006G263400.1 | 5.5367  | 15.9328  | -1.5249 | Down | 7.32E-17  | 2.89E-16  |
| Unigene26     | Potri.016G005400.2 | 7.4723  | 21.5048  | -1.525  | Down | 2.77E-74  | 4.16E-73  |
| Unigene13586  | Potri.012G058900.2 | 10.4027 | 29.9366  | -1.525  | Down | 1.12E-76  | 1.75E-75  |
| Unigene37428  | Potri.006G081800.3 | 40.9894 | 117.963  | -1.525  | Down | 4.28E-104 | 9.60E-103 |
| Unigene10917  | Potri.006G016400.1 | 1.8843  | 5.4229   | -1.525  | Down | 2.95E-16  | 1.13E-15  |

|               |                    |          |          |         |      |           |           |
|---------------|--------------------|----------|----------|---------|------|-----------|-----------|
| Unigene89434  | Potri.005G156600.3 | 123.9816 | 356.7993 | -1.525  | Down | 8.58E-238 | 5.52E-236 |
| Unigene73615  | Potri.009G137800.4 | 73.8953  | 212.6783 | -1.5251 | Down | 6.63E-86  | 1.18E-84  |
| Unigene20152  | Potri.009G124200.3 | 14.793   | 42.5758  | -1.5251 | Down | 8.98E-30  | 5.42E-29  |
| Unigene50028  | Potri.008G058500.2 | 4.0669   | 11.705   | -1.5251 | Down | 1.19E-15  | 4.45E-15  |
| Unigene98240  | Potri.005G000300.1 | 10.9608  | 31.5489  | -1.5252 | Down | 4.79E-15  | 1.75E-14  |
| Unigene18864  | Potri.014G191400.2 | 13.6512  | 39.2939  | -1.5253 | Down | 1.95E-41  | 1.58E-40  |
| Unigene23344  | Potri.010G197800.1 | 6.8597   | 19.7462  | -1.5254 | Down | 2.28E-27  | 1.28E-26  |
| Unigene22420  | Potri.005G075800.3 | 7.613    | 21.9153  | -1.5254 | Down | 1.23E-39  | 9.55E-39  |
| Unigene6508   | Potri.001G052100.4 | 41.1581  | 118.4771 | -1.5254 | Down | 1.52E-91  | 2.91E-90  |
| Unigene30329  | Potri.009G084500.1 | 6.7316   | 19.3793  | -1.5255 | Down | 7.81E-14  | 2.71E-13  |
| Unigene30233  | Potri.009G027800.3 | 4.4094   | 12.6942  | -1.5255 | Down | 7.81E-14  | 2.71E-13  |
| Unigene56435  | Potri.009G021000.2 | 34.4413  | 99.1543  | -1.5255 | Down | 4.37E-50  | 4.28E-49  |
| Unigene52546  | Potri.011G108800.1 | 5.6192   | 16.1785  | -1.5256 | Down | 3.16E-13  | 1.06E-12  |
| Unigene2391   | Potri.010G003300.1 | 2.6903   | 7.7456   | -1.5256 | Down | 3.08E-37  | 2.26E-36  |
| Unigene44949  | Potri.005G112500.1 | 2.5971   | 7.4774   | -1.5256 | Down | 3.16E-13  | 1.06E-12  |
| Unigene28872  | Potri.005G066200.1 | 7.0545   | 20.311   | -1.5256 | Down | 1.23E-36  | 8.87E-36  |
| Unigene19514  | Potri.001G027400.1 | 13.4098  | 38.6069  | -1.5256 | Down | 1.45E-25  | 7.73E-25  |
| Unigene42273  | Potri.013G009400.1 | 35.7719  | 103.0003 | -1.5257 | Down | 3.95E-58  | 4.54E-57  |
| Unigene53212  | Potri.001G148400.3 | 8.1408   | 23.4414  | -1.5258 | Down | 1.28E-12  | 4.18E-12  |
| Unigene11651  | Potri.004G187900.1 | 4.885    | 14.0673  | -1.5259 | Down | 1.08E-44  | 9.41E-44  |
| Unigene5499   | Potri.011G149700.1 | 3.1641   | 9.1121   | -1.526  | Down | 5.19E-12  | 1.65E-11  |
| Unigene1027   | Potri.011G103700.1 | 14.4939  | 41.7393  | -1.526  | Down | 4.29E-44  | 3.69E-43  |
| Unigene92405  | Potri.006G229300.9 | 107.5706 | 309.7822 | -1.526  | Down | 1.36E-275 | 1.07E-273 |
| Unigene18254  | Potri.004G113400.1 | 2.7748   | 7.991    | -1.526  | Down | 5.19E-12  | 1.65E-11  |
| Unigene52651  | Potri.010G109500.2 | 19.9645  | 57.4974  | -1.5261 | Down | 6.78E-43  | 5.68E-42  |
| Unigene76178  | Potri.002G073400.3 | 50.4543  | 145.3126 | -1.5261 | Down | 1.41E-62  | 1.75E-61  |
| Unigene82424  | Potri.009G124900.1 | 35.4417  | 102.0797 | -1.5262 | Down | 1.53E-51  | 1.54E-50  |
| Unigene38460  | Potri.006G193900.1 | 5.3285   | 15.3477  | -1.5262 | Down | 2.11E-11  | 6.49E-11  |
| Unigene2171   | Potri.001G239200.2 | 16.3238  | 47.0194  | -1.5263 | Down | 1.70E-40  | 1.35E-39  |
| Unigene32871  | Potri.011G114100.1 | 13.5756  | 39.1062  | -1.5264 | Down | 3.59E-124 | 1.01E-122 |
| Unigene27744  | Potri.007G126500.1 | 4.7529   | 13.6919  | -1.5264 | Down | 8.57E-11  | 2.56E-10  |
| Unigene103807 | Potri.016G113200.1 | 1.3168   | 3.7934   | -1.5265 | Down | 8.57E-11  | 2.56E-10  |
| Unigene10714  | Potri.004G020300.2 | 7.6748   | 22.1101  | -1.5265 | Down | 3.82E-102 | 8.40E-101 |
| Unigene15495  | Potri.001G424900.1 | 68.6489  | 197.7686 | -1.5265 | Down | 7.32E-157 | 2.79E-155 |
| Unigene54135  | Potri.001G122700.3 | 85.315   | 245.7736 | -1.5265 | Down | 7.21E-168 | 3.00E-166 |
| Unigene46467  | Potri.014G042800.1 | 16.0376  | 46.2064  | -1.5266 | Down | 3.13E-28  | 1.81E-27  |
| Unigene34075  | Potri.014G118000.6 | 1.7742   | 5.1121   | -1.5267 | Down | 3.49E-10  | 1.01E-09  |
| Unigene17978  | Potri.010G241300.1 | 3.765    | 10.8481  | -1.5267 | Down | 3.49E-10  | 1.01E-09  |
| Unigene30972  | Potri.010G195200.1 | 1.5261   | 4.397    | -1.5267 | Down | 3.49E-10  | 1.01E-09  |

|               |                    |         |          |         |      |           |           |
|---------------|--------------------|---------|----------|---------|------|-----------|-----------|
| Unigene21324  | Potri.014G076100.1 | 2.4264  | 6.9914   | -1.5268 | Down | 3.49E-10  | 1.01E-09  |
| Unigene93845  | Potri.013G128700.1 | 12.0175 | 34.6277  | -1.5268 | Down | 2.36E-44  | 2.04E-43  |
| Unigene16638  | Potri.005G145500.1 | 38.5921 | 111.2056 | -1.5269 | Down | 9.38E-44  | 8.01E-43  |
| Unigene24255  | Potri.002G139200.1 | 5.014   | 14.4491  | -1.5269 | Down | 1.99E-26  | 1.09E-25  |
| Unigene32276  | Potri.005G249900.1 | 5.1154  | 14.7422  | -1.527  | Down | 7.97E-26  | 4.28E-25  |
| Unigene6833   | Potri.004G122100.2 | 16.1698 | 46.5977  | -1.527  | Down | 1.69E-34  | 1.16E-33  |
| Unigene1703   | Potri.003G137900.1 | 15.4703 | 44.5821  | -1.527  | Down | 1.69E-34  | 1.16E-33  |
| Unigene19899  | Potri.014G068400.1 | 3.5523  | 10.2377  | -1.5271 | Down | 1.43E-09  | 3.97E-09  |
| Unigene49682  | Potri.009G047500.1 | 2.9083  | 8.3817   | -1.5271 | Down | 1.43E-09  | 3.97E-09  |
| Unigene8369   | Potri.008G174800.2 | 10.1495 | 29.2505  | -1.5271 | Down | 7.97E-26  | 4.28E-25  |
| Unigene628    | Potri.001G305700.2 | 8.7631  | 25.257   | -1.5272 | Down | 8.29E-49  | 7.90E-48  |
| Unigene19485  | Potri.013G087900.1 | 4.2464  | 12.241   | -1.5274 | Down | 1.61E-16  | 6.27E-16  |
| Unigene32587  | Potri.007G079300.3 | 2.2081  | 6.3653   | -1.5274 | Down | 5.85E-09  | 1.57E-08  |
| Unigene48783  | Potri.006G100800.1 | 3.2245  | 9.2952   | -1.5274 | Down | 5.85E-09  | 1.57E-08  |
| Unigene48459  | Potri.005G021400.1 | 5.4121  | 15.6013  | -1.5274 | Down | 5.85E-09  | 1.57E-08  |
| Unigene109765 | Potri.002G036800.4 | 6.3598  | 18.3333  | -1.5274 | Down | 5.85E-09  | 1.57E-08  |
| Unigene7273   | Potri.016G016000.1 | 32.3615 | 93.2905  | -1.5275 | Down | 1.40E-75  | 2.14E-74  |
| Unigene31661  | Potri.004G129700.1 | 46.2645 | 133.3867 | -1.5276 | Down | 6.65E-144 | 2.25E-142 |
| Unigene34028  | Potri.013G004600.1 | 4.3446  | 12.5263  | -1.5277 | Down | 3.70E-37  | 2.71E-36  |
| Unigene36085  | Potri.005G215800.1 | 17.1024 | 49.3102  | -1.5277 | Down | 8.15E-23  | 3.98E-22  |
| Unigene49285  | Potri.005G146400.1 | 3.3044  | 9.5277   | -1.5277 | Down | 1.08E-29  | 6.49E-29  |
| Unigene47930  | Potri.003G086400.1 | 17.9855 | 51.8554  | -1.5277 | Down | 3.70E-37  | 2.71E-36  |
| Unigene83605  | Potri.001G139400.3 | 28.9037 | 83.3361  | -1.5277 | Down | 5.15E-44  | 4.42E-43  |
| Unigene10160  | Potri.T043800.1    | 2.8627  | 8.2547   | -1.5278 | Down | 2.40E-08  | 6.20E-08  |
| Unigene69885  | Potri.018G022700.7 | 2.6983  | 7.7805   | -1.5278 | Down | 2.40E-08  | 6.20E-08  |
| Unigene52150  | Potri.010G110700.1 | 19.1773 | 55.2964  | -1.5278 | Down | 5.90E-64  | 7.53E-63  |
| Unigene117452 | Potri.011G106300.1 | 3.4936  | 10.074   | -1.5279 | Down | 2.40E-08  | 6.20E-08  |
| Unigene29145  | Potri.007G014100.1 | 10.7028 | 30.8639  | -1.5279 | Down | 2.34E-35  | 1.63E-34  |
| Unigene50770  | Potri.003G007400.1 | 2.2891  | 6.6008   | -1.5279 | Down | 2.40E-08  | 6.20E-08  |
| Unigene2575   | Potri.016G086200.1 | 3.5851  | 10.3389  | -1.528  | Down | 1.29E-41  | 1.05E-40  |
| Unigene30482  | Potri.015G064600.1 | 22.861  | 65.926   | -1.528  | Down | 1.72E-28  | 9.98E-28  |
| Unigene45575  | Potri.006G114100.2 | 13.3955 | 38.6301  | -1.528  | Down | 1.81E-48  | 1.71E-47  |
| Unigene53480  | Potri.010G214300.1 | 5.9297  | 17.1045  | -1.5283 | Down | 1.09E-26  | 6.03E-26  |
| Unigene14415  | Potri.002G049700.4 | 2.1776  | 6.2813   | -1.5283 | Down | 9.91E-08  | 2.46E-07  |
| Unigene20066  | Potri.001G399000.1 | 9.2336  | 26.6403  | -1.5286 | Down | 2.03E-37  | 1.50E-36  |
| Unigene49442  | Potri.T077100.1    | 2.55    | 7.3572   | -1.5287 | Down | 1.72E-13  | 5.88E-13  |
| Unigene11302  | Potri.014G017000.2 | 7.8617  | 22.6824  | -1.5287 | Down | 4.13E-138 | 1.33E-136 |
| Unigene3766   | Potri.012G074800.1 | 11.8867 | 34.2973  | -1.5287 | Down | 3.38E-19  | 1.46E-18  |
| Unigene8418   | Potri.010G234700.2 | 11.2447 | 32.4436  | -1.5287 | Down | 4.48E-43  | 3.77E-42  |

|               |                    |         |          |         |      |          |          |
|---------------|--------------------|---------|----------|---------|------|----------|----------|
| Unigene79980  | Potri.005G094600.3 | 48.7178 | 140.5662 | -1.5287 | Down | 2.86E-66 | 3.80E-65 |
| Unigene52613  | Potri.002G159200.1 | 6.6086  | 19.0669  | -1.5287 | Down | 1.72E-13 | 5.88E-13 |
| Unigene1032   | Potri.001G324300.1 | 6.619   | 19.0979  | -1.5287 | Down | 9.95E-49 | 9.47E-48 |
| Unigene63426  | Potri.014G157000.1 | 3.5656  | 10.2885  | -1.5288 | Down | 6.98E-25 | 3.64E-24 |
| Unigene26170  | Potri.004G196800.3 | 18.5848 | 53.6269  | -1.5288 | Down | 1.49E-30 | 9.15E-30 |
| Unigene81486  | Potri.012G011700.2 | 45.4908 | 131.2717 | -1.5289 | Down | 1.79E-64 | 2.30E-63 |
| Unigene48043  | Potri.014G135200.4 | 4.6008  | 13.2771  | -1.529  | Down | 4.10E-07 | 9.73E-07 |
| Unigene42988  | Potri.012G046400.1 | 22.9897 | 66.3435  | -1.529  | Down | 8.36E-81 | 1.39E-79 |
| Unigene13593  | Potri.004G097500.1 | 4.5324  | 13.0795  | -1.529  | Down | 2.82E-41 | 2.28E-40 |
| Unigene43741  | Potri.010G029400.1 | 7.7308  | 22.3116  | -1.5291 | Down | 2.36E-29 | 1.41E-28 |
| Unigene23889  | Potri.001G394300.2 | 6.0761  | 17.5362  | -1.5291 | Down | 2.36E-29 | 1.41E-28 |
| Unigene3237   | Potri.019G000200.1 | 3.1603  | 9.1215   | -1.5292 | Down | 5.45E-18 | 2.25E-17 |
| Unigene54116  | Potri.017G097100.1 | 13.3095 | 38.4149  | -1.5292 | Down | 5.45E-18 | 2.25E-17 |
| Unigene32703  | Potri.006G189100.2 | 3.0426  | 8.7817   | -1.5292 | Down | 5.45E-18 | 2.25E-17 |
| Unigene4927   | Potri.003G148600.1 | 18.6498 | 53.8283  | -1.5292 | Down | 2.03E-34 | 1.39E-33 |
| Unigene34864  | Potri.001G415900.1 | 8.1487  | 23.5191  | -1.5292 | Down | 4.28E-89 | 7.92E-88 |
| Unigene29613  | Potri.011G125800.1 | 4.2422  | 12.2453  | -1.5293 | Down | 2.83E-12 | 9.10E-12 |
| Unigene19573  | Potri.002G205800.1 | 7.7222  | 22.2902  | -1.5293 | Down | 2.83E-12 | 9.10E-12 |
| Unigene46588  | Potri.012G119600.1 | 21.8697 | 63.1286  | -1.5294 | Down | 5.63E-71 | 8.02E-70 |
| Unigene32992  | Potri.018G073100.2 | 14.0683 | 40.6173  | -1.5296 | Down | 8.48E-94 | 1.67E-92 |
| Unigene2086   | Potri.004G060500.1 | 9.5678  | 27.6223  | -1.5296 | Down | 1.50E-27 | 8.50E-27 |
| Unigene25505  | Potri.014G106200.2 | 10.3898 | 29.999   | -1.5297 | Down | 7.16E-22 | 3.39E-21 |
| Unigene73755  | Potri.008G142500.1 | 13.1956 | 38.1001  | -1.5297 | Down | 8.82E-17 | 3.47E-16 |
| Unigene38890  | Potri.005G213200.1 | 8.2037  | 23.6869  | -1.5297 | Down | 8.82E-17 | 3.47E-16 |
| Unigene41616  | Potri.003G100800.1 | 6.029   | 17.4078  | -1.5297 | Down | 8.82E-17 | 3.47E-16 |
| Unigene42130  | Potri.017G106500.1 | 1.6417  | 4.7402   | -1.5298 | Down | 1.71E-06 | 3.86E-06 |
| Unigene35099  | Potri.001G379100.1 | 11.5811 | 33.4408  | -1.5298 | Down | 1.36E-46 | 1.24E-45 |
| Unigene12200  | Potri.002G255400.3 | 16.2976 | 47.0638  | -1.53   | Down | 6.15E-41 | 4.94E-40 |
| Unigene83254  | Potri.002G141100.1 | 23.1035 | 66.7254  | -1.5301 | Down | 2.81E-35 | 1.96E-34 |
| Unigene85965  | Potri.015G094400.3 | 17.7677 | 51.3176  | -1.5302 | Down | 3.25E-30 | 1.98E-29 |
| Unigene6539   | Potri.011G021000.1 | 7.2703  | 21.0007  | -1.5304 | Down | 1.43E-15 | 5.34E-15 |
| Unigene74720  | Potri.006G253100.1 | 51.2224 | 147.963  | -1.5304 | Down | 5.31E-62 | 6.54E-61 |
| Unigene77728  | Potri.002G057400.4 | 33.1374 | 95.7201  | -1.5304 | Down | 1.35E-43 | 1.15E-42 |
| Unigene18084  | Potri.016G136900.1 | 6.7737  | 19.5713  | -1.5307 | Down | 7.06E-33 | 4.65E-32 |
| Unigene10349  | Potri.011G002500.1 | 7.8903  | 22.7974  | -1.5307 | Down | 1.85E-19 | 8.07E-19 |
| Unigene44940  | Potri.009G034900.5 | 10.5204 | 30.3965  | -1.5307 | Down | 6.12E-24 | 3.10E-23 |
| Unigene90975  | Potri.008G073500.2 | 2.0464  | 5.9125   | -1.5307 | Down | 7.15E-06 | 1.53E-05 |
| Unigene1324   | Potri.007G121400.1 | 3.237   | 9.3528   | -1.5307 | Down | 1.90E-10 | 5.56E-10 |
| Unigene118209 | Potri.006G132100.1 | 1.9726  | 5.6993   | -1.5307 | Down | 7.15E-06 | 1.53E-05 |

|               |                    |         |          |         |      |           |           |
|---------------|--------------------|---------|----------|---------|------|-----------|-----------|
| Unigene1345   | Potri.005G003400.2 | 1.249   | 3.6087   | -1.5307 | Down | 7.15E-06  | 1.53E-05  |
| Unigene12525  | Potri.015G140400.1 | 7.2793  | 21.0349  | -1.5309 | Down | 8.24E-28  | 4.70E-27  |
| Unigene10798  | Potri.012G098900.2 | 6.6297  | 19.1581  | -1.5309 | Down | 2.44E-88  | 4.47E-87  |
| Unigene21636  | Potri.009G040300.1 | 4.9719  | 14.3683  | -1.531  | Down | 6.57E-49  | 6.27E-48  |
| Unigene45298  | Potri.008G034500.1 | 2.3892  | 6.9045   | -1.531  | Down | 7.43E-19  | 3.17E-18  |
| Unigene32908  | Potri.007G054200.1 | 4.8062  | 13.8892  | -1.531  | Down | 2.32E-53  | 2.43E-52  |
| Unigene1461   | Potri.006G184700.2 | 3.4312  | 9.9158   | -1.531  | Down | 7.43E-19  | 3.17E-18  |
| Unigene31834  | Potri.001G089800.2 | 10.9705 | 31.7022  | -1.531  | Down | 2.76E-144 | 9.38E-143 |
| Unigene30377  | Potri.014G179000.4 | 3.724   | 10.7628  | -1.5311 | Down | 2.33E-14  | 8.24E-14  |
| Unigene12601  | Potri.008G213000.1 | 4.8652  | 14.0607  | -1.5311 | Down | 2.33E-14  | 8.24E-14  |
| Unigene42225  | Potri.006G066000.1 | 58.8646 | 170.1202 | -1.5311 | Down | 8.94E-151 | 3.23E-149 |
| Unigene16620  | Potri.001G201000.3 | 3.8209  | 11.0428  | -1.5311 | Down | 2.33E-14  | 8.24E-14  |
| Unigene12262  | Potri.008G167800.2 | 10.2083 | 29.5044  | -1.5312 | Down | 9.80E-23  | 4.77E-22  |
| Unigene35862  | Potri.006G066800.1 | 16.0296 | 46.3292  | -1.5312 | Down | 9.80E-23  | 4.77E-22  |
| Unigene46725  | Potri.018G120200.1 | 5.501   | 15.9006  | -1.5313 | Down | 7.76E-10  | 2.19E-09  |
| Unigene103229 | Potri.014G084500.1 | 2.88    | 8.3246   | -1.5313 | Down | 7.76E-10  | 2.19E-09  |
| Unigene32233  | Potri.012G077700.4 | 8.0094  | 23.1505  | -1.5313 | Down | 2.57E-64  | 3.30E-63  |
| Unigene22491  | Potri.003G193100.3 | 5.3848  | 15.5647  | -1.5313 | Down | 2.98E-18  | 1.24E-17  |
| Unigene22713  | Potri.001G273500.1 | 7.9237  | 22.9035  | -1.5313 | Down | 2.98E-18  | 1.24E-17  |
| Unigene28912  | Potri.017G109700.1 | 7.8368  | 22.6532  | -1.5314 | Down | 8.47E-39  | 6.45E-38  |
| Unigene42830  | Potri.009G079600.3 | 2.3001  | 6.6494   | -1.5315 | Down | 9.41E-14  | 3.25E-13  |
| Unigene12028  | Potri.017G057700.3 | 26.6132 | 76.9386  | -1.5316 | Down | 3.21E-54  | 3.41E-53  |
| Unigene51159  | Potri.007G025800.1 | 7.6472  | 22.1103  | -1.5317 | Down | 1.57E-21  | 7.36E-21  |
| Unigene32859  | Potri.005G181700.3 | 4.8543  | 14.0358  | -1.5318 | Down | 2.10E-25  | 1.11E-24  |
| Unigene39579  | Potri.005G027000.2 | 4.3325  | 12.5277  | -1.5318 | Down | 5.34E-37  | 3.90E-36  |
| Unigene13312  | Potri.001G319500.1 | 7.4685  | 21.5955  | -1.5318 | Down | 5.34E-37  | 3.90E-36  |
| Unigene6113   | Potri.011G126800.1 | 29.9264 | 86.5384  | -1.5319 | Down | 1.12E-71  | 1.62E-70  |
| Unigene88386  | Potri.019G103400.1 | 2.1346  | 6.173    | -1.532  | Down | 3.02E-05  | 6.09E-05  |
| Unigene29896  | Potri.014G175400.7 | 5.3152  | 15.3708  | -1.532  | Down | 3.81E-13  | 1.28E-12  |
| Unigene95141  | Potri.012G134600.1 | 3.236   | 9.3582   | -1.532  | Down | 3.02E-05  | 6.08E-05  |
| Unigene37772  | Potri.009G121400.2 | 13.2466 | 38.3074  | -1.532  | Down | 4.82E-17  | 1.92E-16  |
| Unigene73263  | Potri.008G082100.1 | 13.4989 | 39.0371  | -1.532  | Down | 4.82E-17  | 1.92E-16  |
| Unigene6490   | Potri.003G114900.3 | 1.224   | 3.5396   | -1.532  | Down | 3.02E-05  | 6.09E-05  |
| Unigene8928   | Potri.002G084100.3 | 7.1875  | 20.7855  | -1.532  | Down | 6.30E-21  | 2.89E-20  |
| Unigene38263  | Potri.001G299200.1 | 2.2427  | 6.4856   | -1.532  | Down | 3.02E-05  | 6.09E-05  |
| Unigene75633  | Potri.010G248900.2 | 44.1882 | 127.7962 | -1.5321 | Down | 4.45E-55  | 4.81E-54  |
| Unigene63783  | Potri.016G047600.2 | 12.8181 | 37.0749  | -1.5323 | Down | 3.35E-24  | 1.71E-23  |
| Unigene23968  | Potri.013G044300.4 | 3.2911  | 9.5192   | -1.5323 | Down | 3.35E-24  | 1.71E-23  |
| Unigene92780  | Potri.009G095300.1 | 13.6173 | 39.3879  | -1.5323 | Down | 4.65E-39  | 3.57E-38  |



|               |                    |         |          |         |      |           |           |
|---------------|--------------------|---------|----------|---------|------|-----------|-----------|
| Unigene88429  | Potri.007G096900.2 | 12.4332 | 35.9615  | -1.5323 | Down | 3.35E-24  | 1.71E-23  |
| Unigene58543  | Potri.006G169400.1 | 12.1389 | 35.1125  | -1.5323 | Down | 3.37E-35  | 2.34E-34  |
| Unigene33650  | Potri.018G072200.1 | 9.6556  | 27.9301  | -1.5324 | Down | 2.46E-31  | 1.55E-30  |
| Unigene69324  | Potri.016G137000.1 | 1.9229  | 5.5624   | -1.5324 | Down | 1.94E-16  | 7.53E-16  |
| Unigene34486  | Potri.011G092200.1 | 7.9546  | 23.0093  | -1.5324 | Down | 5.00E-50  | 4.88E-49  |
| Unigene19816  | Potri.T137700.1    | 21.2423 | 61.4491  | -1.5325 | Down | 1.81E-27  | 1.02E-26  |
| Unigene30647  | Potri.001G135400.1 | 12.9529 | 37.4717  | -1.5325 | Down | 1.34E-23  | 6.71E-23  |
| Unigene11660  | Potri.007G132900.5 | 2.7591  | 7.982    | -1.5326 | Down | 1.54E-12  | 5.02E-12  |
| Unigene4202   | Potri.005G108700.2 | 14.1866 | 41.0439  | -1.5326 | Down | 1.01E-19  | 4.46E-19  |
| Unigene6989   | Potri.004G217800.4 | 8.3199  | 24.0708  | -1.5326 | Down | 1.01E-19  | 4.46E-19  |
| Unigene110369 | Potri.001G471800.4 | 14.8864 | 43.0684  | -1.5326 | Down | 1.01E-19  | 4.46E-19  |
| Unigene96860  | Potri.017G081900.1 | 1.7191  | 4.9737   | -1.5327 | Down | 1.01E-19  | 4.46E-19  |
| Unigene74552  | Potri.017G057700.3 | 12.0878 | 34.976   | -1.5328 | Down | 7.81E-16  | 2.95E-15  |
| Unigene43370  | Potri.012G020000.1 | 4.5235  | 13.0887  | -1.5328 | Down | 2.93E-37  | 2.15E-36  |
| Unigene27802  | Potri.008G075000.1 | 2.0591  | 5.9581   | -1.5328 | Down | 1.30E-08  | 3.42E-08  |
| Unigene49632  | Potri.003G010200.1 | 7.59    | 21.9617  | -1.5328 | Down | 7.81E-16  | 2.95E-15  |
| Unigene53414  | Potri.001G215700.2 | 19.4848 | 56.3792  | -1.5328 | Down | 5.37E-23  | 2.64E-22  |
| Unigene23390  | Potri.016G066500.2 | 7.8903  | 22.8325  | -1.5329 | Down | 2.88E-26  | 1.57E-25  |
| Unigene90294  | Potri.002G237000.1 | 8.4861  | 24.5576  | -1.533  | Down | 4.06E-19  | 1.75E-18  |
| Unigene78266  | Potri.005G180800.3 | 8.0948  | 23.4271  | -1.5331 | Down | 6.25E-12  | 1.98E-11  |
| Unigene103186 | Potri.001G337700.3 | 5.6114  | 16.24    | -1.5331 | Down | 6.25E-12  | 1.98E-11  |
| Unigene39133  | Potri.001G207700.1 | 3.3728  | 9.7613   | -1.5331 | Down | 6.25E-12  | 1.98E-11  |
| Unigene85794  | Potri.014G138000.2 | 15.0217 | 43.4768  | -1.5332 | Down | 1.15E-25  | 6.14E-25  |
| Unigene95     | Potri.009G125500.1 | 11.4293 | 33.08    | -1.5332 | Down | 6.51E-152 | 2.37E-150 |
| Unigene16583  | Potri.009G165600.1 | 17.4151 | 50.4065  | -1.5333 | Down | 6.22E-29  | 3.66E-28  |
| Unigene22121  | Potri.004G200200.2 | 6.6026  | 19.1105  | -1.5333 | Down | 6.22E-29  | 3.66E-28  |
| Unigene33221  | Potri.010G113900.3 | 3.0568  | 8.8487   | -1.5334 | Down | 8.61E-22  | 4.06E-21  |
| Unigene31449  | Potri.006G146400.5 | 41.845  | 121.1317 | -1.5334 | Down | 2.36E-65  | 3.08E-64  |
| Unigene53634  | Potri.002G159900.2 | 13.5783 | 39.304   | -1.5334 | Down | 1.63E-18  | 6.87E-18  |
| Unigene34488  | Potri.001G319000.3 | 13.9768 | 40.4573  | -1.5334 | Down | 1.85E-35  | 1.30E-34  |
| Unigene53919  | Potri.013G019000.1 | 12.958  | 37.5105  | -1.5335 | Down | 3.10E-45  | 2.74E-44  |
| Unigene31861  | Potri.018G141900.2 | 3.6045  | 10.4355  | -1.5336 | Down | 6.84E-48  | 6.40E-47  |
| Unigene9811   | Potri.018G020400.2 | 18.5361 | 53.662   | -1.5336 | Down | 7.37E-35  | 5.08E-34  |
| Unigene37300  | Potri.018G118200.1 | 1.4736  | 4.2666   | -1.5337 | Down | 1.29E-04  | 2.44E-04  |
| Unigene117885 | Potri.018G034200.1 | 1.5302  | 4.4307   | -1.5338 | Down | 1.29E-04  | 2.44E-04  |
| Unigene28752  | Potri.014G149000.1 | 1.0714  | 3.1023   | -1.5338 | Down | 1.29E-04  | 2.44E-04  |
| Unigene40981  | Potri.014G096700.3 | 1.3502  | 3.9094   | -1.5338 | Down | 1.29E-04  | 2.44E-04  |
| Unigene53702  | Potri.010G033900.2 | 12.0321 | 34.838   | -1.5338 | Down | 6.56E-18  | 2.70E-17  |
| Unigene53121  | Potri.008G116600.1 | 13.1452 | 38.0609  | -1.5338 | Down | 6.56E-18  | 2.70E-17  |

|               |                    |         |          |         |      |           |           |
|---------------|--------------------|---------|----------|---------|------|-----------|-----------|
| Unigene27580  | Potri.008G077300.3 | 5.297   | 15.337   | -1.5338 | Down | 2.54E-11  | 7.80E-11  |
| Unigene31209  | Potri.006G173500.1 | 1.5705  | 4.5473   | -1.5338 | Down | 1.29E-04  | 2.44E-04  |
| Unigene30578  | Potri.006G067800.1 | 2.2022  | 6.3763   | -1.5338 | Down | 1.29E-04  | 2.44E-04  |
| Unigene37622  | Potri.005G004900.2 | 4.8718  | 14.1058  | -1.5338 | Down | 5.36E-08  | 1.35E-07  |
| Unigene3167   | Potri.003G196900.2 | 5.9739  | 17.2969  | -1.5338 | Down | 2.93E-34  | 2.00E-33  |
| Unigene68867  | Potri.002G155500.1 | 2.2144  | 6.4117   | -1.5338 | Down | 5.36E-08  | 1.35E-07  |
| Unigene771    | Potri.002G144000.1 | 2.8351  | 8.2089   | -1.5338 | Down | 1.27E-14  | 4.56E-14  |
| Unigene76438  | Potri.003G137400.3 | 23.271  | 67.3902  | -1.534  | Down | 2.14E-30  | 1.32E-29  |
| Unigene2019   | Potri.002G071400.3 | 18.3155 | 53.0402  | -1.534  | Down | 3.81E-113 | 9.51E-112 |
| Unigene1517   | Potri.007G103700.1 | 3.6448  | 10.5563  | -1.5342 | Down | 2.64E-17  | 1.06E-16  |
| Unigene7443   | Potri.006G220100.1 | 2.4717  | 7.1586   | -1.5342 | Down | 2.64E-17  | 1.06E-16  |
| Unigene10556  | Potri.006G108300.2 | 18.8718 | 54.6567  | -1.5342 | Down | 2.55E-36  | 1.83E-35  |
| Unigene42990  | Potri.003G075000.1 | 12.3767 | 35.847   | -1.5342 | Down | 3.64E-61  | 4.41E-60  |
| Unigene83444  | Potri.T081000.1    | 46.7284 | 135.345  | -1.5343 | Down | 2.54E-70  | 3.59E-69  |
| Unigene24014  | Potri.003G164300.2 | 4.1444  | 12.0043  | -1.5343 | Down | 5.13E-14  | 1.79E-13  |
| Unigene44994  | Potri.003G117500.1 | 2.4492  | 7.0941   | -1.5343 | Down | 5.13E-14  | 1.79E-13  |
| Unigene45358  | Potri.002G227300.1 | 5.1303  | 14.8599  | -1.5343 | Down | 1.58E-26  | 8.66E-26  |
| Unigene79090  | Potri.018G025600.2 | 6.9937  | 20.26    | -1.5345 | Down | 1.03E-10  | 3.07E-10  |
| Unigene27460  | Potri.015G125400.1 | 8.1877  | 23.7191  | -1.5345 | Down | 1.03E-10  | 3.07E-10  |
| Unigene4501   | Potri.008G009100.1 | 7.5268  | 21.8045  | -1.5345 | Down | 1.03E-10  | 3.07E-10  |
| Unigene38771  | Potri.006G052300.1 | 2.7072  | 7.8426   | -1.5345 | Down | 1.03E-10  | 3.07E-10  |
| Unigene48691  | Potri.005G108100.1 | 30.4718 | 88.2712  | -1.5345 | Down | 8.30E-51  | 8.24E-50  |
| Unigene87705  | Potri.015G076100.3 | 76.1144 | 220.5163 | -1.5346 | Down | 1.36E-134 | 4.22E-133 |
| Unigene40983  | Potri.011G078800.1 | 12.0007 | 34.7689  | -1.5347 | Down | 1.06E-16  | 4.16E-16  |
| Unigene85870  | Potri.008G041800.1 | 9.3883  | 27.2002  | -1.5347 | Down | 1.06E-16  | 4.16E-16  |
| Unigene50315  | Potri.006G039400.1 | 11.6791 | 33.8372  | -1.5347 | Down | 5.93E-47  | 5.44E-46  |
| Unigene21926  | Potri.016G075500.1 | 3.3344  | 9.6614   | -1.5348 | Down | 1.61E-34  | 1.10E-33  |
| Unigene44319  | Potri.005G153400.1 | 6.3014  | 18.2583  | -1.5348 | Down | 1.61E-34  | 1.10E-33  |
| Unigene16785  | Potri.002G138600.1 | 19.1577 | 55.5087  | -1.5348 | Down | 1.36E-28  | 7.93E-28  |
| Unigene45595  | Potri.001G028400.1 | 6.2882  | 18.2201  | -1.5348 | Down | 1.61E-34  | 1.10E-33  |
| Unigene22878  | Potri.012G055800.2 | 1.6616  | 4.8148   | -1.5349 | Down | 2.22E-07  | 5.35E-07  |
| Unigene41101  | Potri.011G163400.2 | 4.2419  | 12.2919  | -1.5349 | Down | 2.22E-07  | 5.35E-07  |
| Unigene13843  | Potri.010G033900.2 | 4.7582  | 13.7879  | -1.5349 | Down | 2.22E-19  | 9.68E-19  |
| Unigene103024 | Potri.010G003800.3 | 3.3385  | 9.6742   | -1.5349 | Down | 2.22E-07  | 5.35E-07  |
| Unigene1871   | Potri.005G213400.3 | 2.0963  | 6.0745   | -1.5349 | Down | 2.22E-07  | 5.35E-07  |
| Unigene28371  | Potri.002G228300.1 | 2.2075  | 6.3968   | -1.5349 | Down | 2.22E-07  | 5.35E-07  |
| Unigene57603  | Potri.013G061400.1 | 5.6504  | 16.3746  | -1.535  | Down | 6.42E-34  | 4.33E-33  |
| Unigene33657  | Potri.013G000600.1 | 12.9261 | 37.4617  | -1.5351 | Down | 5.63E-57  | 6.33E-56  |
| Unigene21881  | Potri.010G023400.2 | 3.834   | 11.111   | -1.5351 | Down | 5.43E-28  | 3.11E-27  |

|               |                    |         |          |         |      |           |           |
|---------------|--------------------|---------|----------|---------|------|-----------|-----------|
| Unigene96236  | Potri.005G105600.3 | 2.1199  | 6.1447   | -1.5353 | Down | 2.17E-27  | 1.22E-26  |
| Unigene39536  | Potri.002G129000.1 | 5.0893  | 14.7511  | -1.5353 | Down | 2.56E-33  | 1.70E-32  |
| Unigene15156  | Potri.019G025200.1 | 4.9575  | 14.37    | -1.5354 | Down | 4.22E-10  | 1.21E-09  |
| Unigene48525  | Potri.016G080500.2 | 7.0886  | 20.5472  | -1.5354 | Down | 4.22E-10  | 1.21E-09  |
| Unigene8754   | Potri.013G035800.3 | 15.0752 | 43.7014  | -1.5355 | Down | 1.89E-21  | 8.82E-21  |
| Unigene3837   | Potri.007G050100.1 | 23.4431 | 67.959   | -1.5355 | Down | 4.36E-61  | 5.29E-60  |
| Unigene53324  | Potri.001G343900.1 | 11.0307 | 31.9766  | -1.5355 | Down | 1.89E-21  | 8.82E-21  |
| Unigene29203  | Potri.017G059200.5 | 3.999   | 11.5934  | -1.5356 | Down | 8.40E-13  | 2.77E-12  |
| Unigene42872  | Potri.006G131300.1 | 9.8157  | 28.4565  | -1.5356 | Down | 1.19E-102 | 2.63E-101 |
| Unigene1335   | Potri.018G089700.4 | 5.94    | 17.2222  | -1.5357 | Down | 1.72E-15  | 6.40E-15  |
| Unigene13055  | Potri.009G068300.2 | 5.4971  | 15.9377  | -1.5357 | Down | 1.06E-40  | 8.48E-40  |
| Unigene88913  | Potri.006G255000.1 | 19.3003 | 55.9556  | -1.5357 | Down | 4.85E-38  | 3.63E-37  |
| Unigene2935   | Potri.015G064300.1 | 4.5366  | 13.1541  | -1.5358 | Down | 3.39E-65  | 4.41E-64  |
| Unigene89727  | Potri.003G158800.2 | 16.6461 | 48.2665  | -1.5358 | Down | 8.84E-35  | 6.09E-34  |
| Unigene28702  | Potri.005G156500.1 | 14.9836 | 43.4481  | -1.5359 | Down | 2.72E-59  | 3.20E-58  |
| Unigene33933  | Potri.003G117300.2 | 6.1404  | 17.8054  | -1.5359 | Down | 7.57E-21  | 3.47E-20  |
| Unigene2928   | Potri.014G128600.7 | 4.1602  | 12.0648  | -1.5361 | Down | 1.62E-31  | 1.03E-30  |
| Unigene43568  | Potri.013G136700.1 | 16.1846 | 46.9405  | -1.5362 | Down | 2.11E-63  | 2.67E-62  |
| Unigene45046  | Potri.001G244100.1 | 17.9011 | 51.9181  | -1.5362 | Down | 1.94E-55  | 2.11E-54  |
| Unigene27356  | Potri.006G020700.6 | 4.7307  | 13.7218  | -1.5363 | Down | 9.20E-07  | 2.12E-06  |
| Unigene3406   | Potri.004G211800.1 | 2.5321  | 7.3446   | -1.5363 | Down | 9.20E-07  | 2.12E-06  |
| Unigene106069 | Potri.001G368500.2 | 1.5529  | 4.5043   | -1.5363 | Down | 3.41E-12  | 1.09E-11  |
| Unigene25344  | Potri.001G314300.1 | 14.106  | 40.9158  | -1.5363 | Down | 6.45E-23  | 3.16E-22  |
| Unigene43276  | Potri.001G059900.3 | 6.5908  | 19.1172  | -1.5363 | Down | 6.70E-39  | 5.12E-38  |
| Unigene15879  | Potri.014G072100.1 | 1.3854  | 4.0185   | -1.5364 | Down | 5.57E-04  | 9.83E-04  |
| Unigene106781 | Potri.013G157700.1 | 1.0799  | 3.1325   | -1.5364 | Down | 5.57E-04  | 9.83E-04  |
| Unigene69881  | Potri.012G143900.2 | 1.0657  | 3.0912   | -1.5364 | Down | 5.57E-04  | 9.83E-04  |
| Unigene16507  | Potri.012G089700.1 | 2.309   | 6.6975   | -1.5364 | Down | 5.57E-04  | 9.83E-04  |
| Unigene19156  | Potri.012G061400.1 | 8.4329  | 24.4606  | -1.5364 | Down | 1.44E-17  | 5.85E-17  |
| Unigene97346  | Potri.011G144900.2 | 1.6109  | 4.6727   | -1.5364 | Down | 9.20E-07  | 2.12E-06  |
| Unigene29920  | Potri.009G006800.1 | 1.4474  | 4.1985   | -1.5364 | Down | 5.57E-04  | 9.83E-04  |
| Unigene63540  | Potri.008G017800.1 | 6.036   | 17.5081  | -1.5364 | Down | 1.44E-17  | 5.85E-17  |
| Unigene57067  | Potri.006G230600.1 | 2.1361  | 6.196    | -1.5364 | Down | 5.57E-04  | 9.83E-04  |
| Unigene53004  | Potri.006G174900.1 | 1.5591  | 4.5225   | -1.5364 | Down | 5.57E-04  | 9.83E-04  |
| Unigene53205  | Potri.005G080200.4 | 13.5229 | 39.2246  | -1.5364 | Down | 3.03E-20  | 1.36E-19  |
| Unigene33291  | Potri.004G162500.1 | 4.8611  | 14.1001  | -1.5364 | Down | 6.45E-23  | 3.16E-22  |
| Unigene4554   | Potri.003G019100.1 | 1.2307  | 3.5698   | -1.5364 | Down | 5.57E-04  | 9.83E-04  |
| Unigene31549  | Potri.002G060200.3 | 37.9525 | 110.0916 | -1.5364 | Down | 1.13E-96  | 2.31E-95  |
| Unigene32830  | Potri.010G084100.1 | 10.9866 | 31.87    | -1.5365 | Down | 2.02E-83  | 3.47E-82  |

|               |                    |         |          |         |      |           |           |
|---------------|--------------------|---------|----------|---------|------|-----------|-----------|
| Unigene2165   | Potri.008G042100.1 | 13.6931 | 39.7242  | -1.5366 | Down | 5.85E-41  | 4.69E-40  |
| Unigene35583  | Potri.012G012800.1 | 8.9438  | 25.9507  | -1.5368 | Down | 1.22E-19  | 5.35E-19  |
| Unigene83562  | Potri.009G144300.3 | 36.3361 | 105.4306 | -1.5368 | Down | 1.06E-55  | 1.17E-54  |
| Unigene32611  | Potri.001G000400.1 | 3.138   | 9.1051   | -1.5368 | Down | 1.22E-19  | 5.35E-19  |
| Unigene83191  | Potri.014G161300.1 | 76.974  | 223.3515 | -1.5369 | Down | 2.77E-114 | 7.00E-113 |
| Unigene92255  | Potri.004G003000.2 | 82.3799 | 239.0372 | -1.5369 | Down | 2.60E-211 | 1.44E-209 |
| Unigene29776  | Potri.005G176300.1 | 26.4567 | 76.788   | -1.5372 | Down | 3.68E-39  | 2.83E-38  |
| Unigene40188  | Potri.002G134900.1 | 3.3413  | 9.6973   | -1.5372 | Down | 1.38E-11  | 4.30E-11  |
| Unigene49877  | Potri.001G060900.1 | 2.5961  | 7.5347   | -1.5372 | Down | 1.38E-11  | 4.30E-11  |
| Unigene43455  | Potri.004G155600.1 | 7.2551  | 21.0582  | -1.5373 | Down | 1.68E-36  | 1.21E-35  |
| Unigene21264  | Potri.001G146400.1 | 12.8755 | 37.3707  | -1.5373 | Down | 1.21E-128 | 3.54E-127 |
| Unigene10187  | Potri.014G179800.2 | 4.0203  | 11.6706  | -1.5375 | Down | 7.06E-09  | 1.88E-08  |
| Unigene21245  | Potri.008G038200.1 | 7.9833  | 23.1746  | -1.5375 | Down | 3.74E-112 | 9.23E-111 |
| Unigene43280  | Potri.007G016100.3 | 12.5225 | 36.3553  | -1.5376 | Down | 4.72E-145 | 1.62E-143 |
| Unigene26268  | Potri.001G341100.3 | 35.7408 | 103.7618 | -1.5376 | Down | 1.97E-67  | 2.66E-66  |
| Unigene8165   | Potri.018G132100.1 | 4.858   | 14.1047  | -1.5377 | Down | 1.13E-13  | 3.89E-13  |
| Unigene74153  | Potri.017G036600.2 | 37.1253 | 107.7865 | -1.5377 | Down | 2.45E-45  | 2.17E-44  |
| Unigene29905  | Potri.012G000700.2 | 8.8737  | 25.7639  | -1.5377 | Down | 1.13E-13  | 3.89E-13  |
| Unigene49140  | Potri.001G144500.1 | 11.7683 | 34.1682  | -1.5377 | Down | 7.58E-26  | 4.07E-25  |
| Unigene17501  | Potri.010G177200.4 | 8.838   | 25.6604  | -1.5378 | Down | 7.58E-26  | 4.07E-25  |
| Unigene43220  | Potri.001G208700.2 | 3.6038  | 10.4637  | -1.5378 | Down | 1.12E-42  | 9.30E-42  |
| Unigene11669  | Potri.001G146500.3 | 6.7574  | 19.6196  | -1.5378 | Down | 3.42E-74  | 5.13E-73  |
| Unigene114265 | Potri.019G120500.1 | 3.2131  | 9.3314   | -1.5381 | Down | 3.84E-06  | 8.45E-06  |
| Unigene20751  | Potri.019G030300.2 | 1.4615  | 4.2444   | -1.5381 | Down | 3.84E-06  | 8.45E-06  |
| Unigene75459  | Potri.016G118800.1 | 23.2911 | 67.6421  | -1.5381 | Down | 5.63E-30  | 3.41E-29  |
| Unigene12294  | Potri.016G087800.1 | 1.557   | 4.5217   | -1.5381 | Down | 3.84E-06  | 8.45E-06  |
| Unigene39374  | Potri.008G072100.1 | 11.1704 | 32.4412  | -1.5381 | Down | 3.03E-25  | 1.60E-24  |
| Unigene112896 | Potri.005G182100.1 | 6.9185  | 20.0926  | -1.5381 | Down | 5.62E-11  | 1.70E-10  |
| Unigene44983  | Potri.005G061100.1 | 4.5343  | 13.1685  | -1.5381 | Down | 3.03E-25  | 1.60E-24  |
| Unigene49481  | Potri.001G163900.1 | 4.1245  | 11.9783  | -1.5381 | Down | 5.62E-11  | 1.70E-10  |
| Unigene31196  | Potri.018G064000.2 | 2.8788  | 8.3607   | -1.5382 | Down | 3.84E-06  | 8.45E-06  |
| Unigene107149 | Potri.013G128100.1 | 1.5541  | 4.5136   | -1.5382 | Down | 3.84E-06  | 8.45E-06  |
| Unigene7215   | Potri.017G001100.1 | 26.4635 | 76.876   | -1.5385 | Down | 2.61E-75  | 3.99E-74  |
| Unigene1418   | Potri.010G226500.1 | 12.4332 | 36.1171  | -1.5385 | Down | 4.45E-57  | 5.02E-56  |
| Unigene49556  | Potri.011G103700.1 | 18.2161 | 52.9183  | -1.5386 | Down | 3.67E-36  | 2.63E-35  |
| Unigene107194 | Potri.008G196400.1 | 2.9586  | 8.5949   | -1.5386 | Down | 4.58E-13  | 1.53E-12  |
| Unigene33153  | Potri.019G054600.1 | 14.6832 | 42.6593  | -1.5387 | Down | 5.36E-45  | 4.70E-44  |
| Unigene25447  | Potri.017G014800.2 | 15.7458 | 45.7472  | -1.5387 | Down | 1.04E-26  | 5.74E-26  |
| Unigene28080  | Potri.015G104300.1 | 3.9433  | 11.4566  | -1.5387 | Down | 1.04E-26  | 5.74E-26  |

|               |                    |          |          |         |      |           |           |
|---------------|--------------------|----------|----------|---------|------|-----------|-----------|
| Unigene27191  | Potri.T074100.2    | 4.1725   | 12.1237  | -1.5388 | Down | 2.90E-08  | 7.46E-08  |
| Unigene113782 | Potri.014G089200.1 | 4.7342   | 13.7557  | -1.5388 | Down | 2.90E-08  | 7.46E-08  |
| Unigene33835  | Potri.006G265100.1 | 8.0714   | 23.4523  | -1.5388 | Down | 3.79E-15  | 1.39E-14  |
| Unigene16544  | Potri.009G062200.3 | 3.5472   | 10.3069  | -1.5389 | Down | 2.90E-08  | 7.46E-08  |
| Unigene77835  | Potri.009G014400.1 | 33.2975  | 96.7549  | -1.5389 | Down | 2.13E-44  | 1.84E-43  |
| Unigene28554  | Potri.006G147100.1 | 1.8371   | 5.338    | -1.5389 | Down | 2.90E-08  | 7.46E-08  |
| Unigene103518 | Potri.009G069700.1 | 2.1722   | 6.3126   | -1.5391 | Down | 3.17E-17  | 1.27E-16  |
| Unigene94699  | Potri.005G075600.1 | 4.7804   | 13.892   | -1.5391 | Down | 3.17E-17  | 1.27E-16  |
| Unigene1834   | Potri.002G169100.1 | 10.7473  | 31.2335  | -1.5391 | Down | 4.15E-26  | 2.25E-25  |
| Unigene52824  | Potri.004G092500.1 | 23.895   | 69.4451  | -1.5392 | Down | 8.46E-44  | 7.23E-43  |
| Unigene8839   | Potri.019G027900.1 | 22.8709  | 66.4792  | -1.5394 | Down | 2.67E-32  | 1.73E-31  |
| Unigene3637   | Potri.018G082900.6 | 48.6141  | 141.3197 | -1.5395 | Down | 9.20E-106 | 2.11E-104 |
| Unigene59586  | Potri.018G058300.1 | 7.1682   | 20.8378  | -1.5395 | Down | 2.98E-60  | 3.56E-59  |
| Unigene15008  | Potri.005G098500.2 | 25.6737  | 74.6297  | -1.5395 | Down | 2.32E-34  | 1.58E-33  |
| Unigene45093  | Potri.004G112900.1 | 10.2429  | 29.7745  | -1.5395 | Down | 2.32E-34  | 1.58E-33  |
| Unigene15757  | Potri.001G162800.1 | 18.0812  | 52.5593  | -1.5395 | Down | 2.32E-34  | 1.58E-33  |
| Unigene44526  | Potri.001G112400.1 | 8.5456   | 24.8407  | -1.5395 | Down | 2.32E-34  | 1.58E-33  |
| Unigene22149  | Potri.015G111600.1 | 3.4456   | 10.0168  | -1.5396 | Down | 1.43E-27  | 8.08E-27  |
| Unigene75250  | Potri.001G053600.2 | 10.6812  | 31.0522  | -1.5396 | Down | 1.53E-14  | 5.46E-14  |
| Unigene21292  | Potri.011G091900.3 | 7.4958   | 21.7935  | -1.5397 | Down | 1.04E-61  | 1.28E-60  |
| Unigene14644  | Potri.002G252600.1 | 24.0148  | 69.8195  | -1.5397 | Down | 1.18E-59  | 1.40E-58  |
| Unigene8392   | Potri.003G116200.1 | 6.0231   | 17.5126  | -1.5398 | Down | 1.07E-18  | 4.55E-18  |
| Unigene18077  | Potri.002G071800.4 | 7.1006   | 20.6456  | -1.5398 | Down | 8.03E-36  | 5.69E-35  |
| Unigene43354  | Potri.014G001700.1 | 2.2882   | 6.6537   | -1.5399 | Down | 7.75E-23  | 3.78E-22  |
| Unigene49012  | Potri.017G038700.1 | 9.4716   | 27.5427  | -1.54   | Down | 6.63E-25  | 3.46E-24  |
| Unigene22667  | Potri.015G069600.1 | 10.2357  | 29.7651  | -1.54   | Down | 3.13E-50  | 3.07E-49  |
| Unigene6981   | Potri.004G069000.1 | 5.8867   | 17.118   | -1.54   | Down | 6.63E-25  | 3.46E-24  |
| Unigene83086  | Potri.009G119500.1 | 21.4543  | 62.3928  | -1.5401 | Down | 3.68E-33  | 2.44E-32  |
| Unigene34531  | Potri.003G178800.2 | 14.393   | 41.8575  | -1.5401 | Down | 1.27E-64  | 1.64E-63  |
| Unigene13811  | Potri.002G040800.1 | 5.9149   | 17.2023  | -1.5402 | Down | 2.42E-39  | 1.87E-38  |
| Unigene42448  | Potri.011G135800.1 | 7.9875   | 23.2327  | -1.5403 | Down | 1.01E-90  | 1.92E-89  |
| Unigene95571  | Potri.016G045800.2 | 1.3466   | 3.917    | -1.5404 | Down | 1.61E-05  | 3.35E-05  |
| Unigene88543  | Potri.010G053600.5 | 103.1026 | 299.8896 | -1.5404 | Down | 8.09E-192 | 4.01E-190 |
| Unigene35993  | Potri.004G203300.1 | 1.6324   | 4.7484   | -1.5404 | Down | 1.61E-05  | 3.35E-05  |
| Unigene88323  | Potri.018G017600.2 | 12.3956  | 36.0574  | -1.5405 | Down | 2.65E-24  | 1.36E-23  |
| Unigene94800  | Potri.017G116400.1 | 1.8344   | 5.3361   | -1.5405 | Down | 1.20E-07  | 2.95E-07  |
| Unigene34070  | Potri.017G065200.2 | 18.6943  | 54.3795  | -1.5405 | Down | 6.42E-45  | 5.62E-44  |
| Unigene11395  | Potri.010G178400.1 | 7.845    | 22.8203  | -1.5405 | Down | 5.63E-47  | 5.16E-46  |
| Unigene115982 | Potri.010G146400.1 | 2.4539   | 7.1382   | -1.5405 | Down | 1.61E-05  | 3.35E-05  |

|               |                    |         |          |         |      |           |           |
|---------------|--------------------|---------|----------|---------|------|-----------|-----------|
| Unigene17463  | Potri.010G048700.1 | 1.9128  | 5.5641   | -1.5405 | Down | 1.20E-07  | 2.95E-07  |
| Unigene44036  | Potri.008G196900.1 | 3.2017  | 9.3133   | -1.5405 | Down | 9.35E-10  | 2.63E-09  |
| Unigene34227  | Potri.008G031200.1 | 7.6807  | 22.3424  | -1.5405 | Down | 1.27E-34  | 8.73E-34  |
| Unigene49027  | Potri.007G070100.1 | 2.4168  | 7.0302   | -1.5405 | Down | 1.20E-07  | 2.95E-07  |
| Unigene35503  | Potri.006G220800.2 | 2.976   | 8.6569   | -1.5405 | Down | 1.20E-07  | 2.95E-07  |
| Unigene44187  | Potri.003G086400.1 | 8.567   | 24.9205  | -1.5405 | Down | 1.96E-28  | 1.14E-27  |
| Unigene17373  | Potri.003G070100.3 | 6.9812  | 20.3075  | -1.5405 | Down | 5.13E-16  | 1.95E-15  |
| Unigene66308  | Potri.003G037800.4 | 4.2466  | 12.3529  | -1.5405 | Down | 6.18E-14  | 2.15E-13  |
| Unigene35198  | Potri.003G019100.1 | 2.4379  | 7.0915   | -1.5405 | Down | 1.20E-07  | 2.95E-07  |
| Unigene53633  | Potri.002G228800.2 | 3.2719  | 9.5175   | -1.5405 | Down | 1.61E-05  | 3.35E-05  |
| Unigene31482  | Potri.002G110900.3 | 6.1147  | 17.7869  | -1.5405 | Down | 9.35E-10  | 2.63E-09  |
| Unigene98930  | Potri.002G071400.3 | 2.5902  | 7.5347   | -1.5405 | Down | 1.61E-05  | 3.35E-05  |
| Unigene13063  | Potri.001G348700.1 | 5.5259  | 16.0741  | -1.5405 | Down | 6.18E-14  | 2.15E-13  |
| Unigene42754  | Potri.008G114800.1 | 9.5354  | 27.7394  | -1.5406 | Down | 7.71E-102 | 1.69E-100 |
| Unigene21283  | Potri.008G101200.1 | 9.6125  | 27.964   | -1.5406 | Down | 4.43E-175 | 1.94E-173 |
| Unigene23418  | Potri.005G003800.1 | 15.5073 | 45.1164  | -1.5407 | Down | 1.96E-48  | 1.85E-47  |
| Unigene24558  | Potri.018G095300.1 | 28.168  | 81.9572  | -1.5408 | Down | 6.18E-159 | 2.39E-157 |
| Unigene28947  | Potri.005G010500.1 | 6.0181  | 17.5095  | -1.5408 | Down | 3.34E-40  | 2.63E-39  |
| Unigene29877  | Potri.014G060100.2 | 12.7847 | 37.2033  | -1.541  | Down | 1.24E-21  | 5.84E-21  |
| Unigene72586  | Potri.005G106200.1 | 17.4785 | 50.8624  | -1.541  | Down | 1.24E-21  | 5.84E-21  |
| Unigene54162  | Potri.001G278900.1 | 29.1037 | 84.6953  | -1.5411 | Down | 1.53E-37  | 1.13E-36  |
| Unigene14140  | Potri.010G244800.2 | 7.578   | 22.0541  | -1.5412 | Down | 1.73E-17  | 7.01E-17  |
| Unigene45564  | Potri.006G146900.4 | 3.7421  | 10.8906  | -1.5412 | Down | 2.02E-33  | 1.35E-32  |
| Unigene93683  | Potri.005G145500.1 | 64.071  | 186.4723 | -1.5412 | Down | 1.28E-220 | 7.47E-219 |
| Unigene349    | Potri.013G154200.1 | 2.2077  | 6.4258   | -1.5413 | Down | 3.12E-27  | 1.75E-26  |
| Unigene44870  | Potri.001G035000.3 | 3.0146  | 8.7739   | -1.5413 | Down | 2.07E-15  | 7.67E-15  |
| Unigene107711 | Potri.008G102300.1 | 8.6786  | 25.265   | -1.5416 | Down | 3.06E-11  | 9.35E-11  |
| Unigene16582  | Potri.008G038300.1 | 5.0196  | 14.6128  | -1.5416 | Down | 1.84E-40  | 1.46E-39  |
| Unigene11606  | Potri.002G145000.1 | 4.2525  | 12.3797  | -1.5416 | Down | 1.84E-40  | 1.46E-39  |
| Unigene35376  | Potri.003G098400.1 | 15.0346 | 43.771   | -1.5417 | Down | 1.08E-28  | 6.29E-28  |
| Unigene47889  | Potri.010G217900.2 | 6.053   | 17.6251  | -1.5419 | Down | 3.83E-09  | 1.04E-08  |
| Unigene40347  | Potri.009G003500.1 | 11.3743 | 33.1197  | -1.5419 | Down | 1.45E-24  | 7.50E-24  |
| Unigene49316  | Potri.006G003800.3 | 3.9887  | 11.6142  | -1.5419 | Down | 3.83E-09  | 1.04E-08  |
| Unigene35915  | Potri.005G139800.1 | 15.5648 | 45.3217  | -1.5419 | Down | 1.45E-24  | 7.50E-24  |
| Unigene50166  | Potri.004G091300.1 | 6.9873  | 20.345   | -1.5419 | Down | 2.02E-72  | 2.94E-71  |
| Unigene27618  | Potri.016G001400.1 | 5.2034  | 15.1527  | -1.542  | Down | 1.70E-22  | 8.20E-22  |
| Unigene48027  | Potri.012G000900.1 | 14.2161 | 41.3983  | -1.542  | Down | 1.70E-22  | 8.20E-22  |
| Unigene290    | Potri.014G128000.1 | 2.7698  | 8.068    | -1.5424 | Down | 1.48E-29  | 8.86E-29  |
| Unigene102050 | Potri.013G051200.1 | 3.9964  | 11.641   | -1.5424 | Down | 4.96E-07  | 1.17E-06  |

|               |                    |         |          |         |      |           |           |
|---------------|--------------------|---------|----------|---------|------|-----------|-----------|
| Unigene21073  | Potri.009G152800.1 | 23.6564 | 68.9082  | -1.5424 | Down | 1.01E-40  | 8.04E-40  |
| Unigene14102  | Potri.005G231500.6 | 9.746   | 28.3889  | -1.5424 | Down | 3.83E-35  | 2.66E-34  |
| Unigene80722  | Potri.003G044400.3 | 4.0284  | 11.7341  | -1.5424 | Down | 4.96E-07  | 1.17E-06  |
| Unigene28773  | Potri.001G232400.1 | 8.2144  | 23.9276  | -1.5424 | Down | 1.48E-29  | 8.86E-29  |
| Unigene3324   | Potri.019G056900.1 | 2.3585  | 6.8701   | -1.5425 | Down | 4.96E-07  | 1.17E-06  |
| Unigene52443  | Potri.016G095900.1 | 5.429   | 15.8141  | -1.5425 | Down | 3.83E-35  | 2.66E-34  |
| Unigene7130   | Potri.013G114300.2 | 14.4203 | 42.0079  | -1.5426 | Down | 1.16E-38  | 8.78E-38  |
| Unigene36754  | Potri.006G275200.1 | 10.657  | 31.0469  | -1.5426 | Down | 6.80E-22  | 3.22E-21  |
| Unigene46190  | Potri.003G031000.2 | 65.6994 | 191.3988 | -1.5426 | Down | 1.83E-240 | 1.19E-238 |
| Unigene42908  | Potri.001G312900.3 | 8.4176  | 24.5229  | -1.5426 | Down | 1.30E-82  | 2.21E-81  |
| Unigene28362  | Potri.002G135100.1 | 8.2501  | 24.036   | -1.5427 | Down | 2.80E-16  | 1.08E-15  |
| Unigene43171  | Potri.002G043200.1 | 2.7532  | 8.0216   | -1.5428 | Down | 1.99E-25  | 1.06E-24  |
| Unigene62894  | Potri.014G132000.2 | 3.0619  | 8.9217   | -1.5429 | Down | 8.00E-20  | 3.54E-19  |
| Unigene41423  | Potri.013G070700.4 | 1.5015  | 4.3752   | -1.5429 | Down | 1.25E-10  | 3.68E-10  |
| Unigene118590 | Potri.006G210600.1 | 7.1667  | 20.8823  | -1.5429 | Down | 8.00E-20  | 3.54E-19  |
| Unigene22862  | Potri.010G197800.2 | 8.9417  | 26.0562  | -1.543  | Down | 2.32E-23  | 1.15E-22  |
| Unigene39734  | Potri.006G237600.1 | 5.3678  | 15.6441  | -1.5432 | Down | 9.47E-18  | 3.87E-17  |
| Unigene422    | Potri.010G162400.1 | 5.3393  | 15.5641  | -1.5435 | Down | 5.14E-60  | 6.11E-59  |
| Unigene14180  | Potri.006G249700.3 | 6.5921  | 19.2161  | -1.5435 | Down | 4.87E-67  | 6.55E-66  |
| Unigene38870  | Potri.T138200.1    | 1.3906  | 4.0538   | -1.5436 | Down | 6.85E-05  | 1.34E-04  |
| Unigene3595   | Potri.016G144200.2 | 5.9633  | 17.3842  | -1.5436 | Down | 4.10E-12  | 1.31E-11  |
| Unigene37604  | Potri.016G029700.3 | 2.6311  | 7.6702   | -1.5436 | Down | 6.85E-05  | 1.34E-04  |
| Unigene42284  | Potri.014G169100.2 | 7.5129  | 21.9019  | -1.5436 | Down | 3.21E-19  | 1.39E-18  |
| Unigene6961   | Potri.010G238000.1 | 4.1444  | 12.0818  | -1.5436 | Down | 1.57E-08  | 4.11E-08  |
| Unigene12743  | Potri.009G052600.1 | 9.2031  | 26.829   | -1.5436 | Down | 7.28E-37  | 5.30E-36  |
| Unigene30548  | Potri.008G001700.1 | 12.8532 | 37.47    | -1.5436 | Down | 9.30E-23  | 4.53E-22  |
| Unigene51080  | Potri.007G082800.1 | 1.647   | 4.8013   | -1.5436 | Down | 6.85E-05  | 1.34E-04  |
| Unigene42624  | Potri.006G204100.4 | 3.0303  | 8.834    | -1.5436 | Down | 1.13E-15  | 4.24E-15  |
| Unigene46170  | Potri.006G100400.1 | 2.2406  | 6.5319   | -1.5436 | Down | 6.85E-05  | 1.34E-04  |
| Unigene58979  | Potri.006G009100.1 | 3.1391  | 9.1511   | -1.5436 | Down | 6.85E-05  | 1.34E-04  |
| Unigene45760  | Potri.005G179900.1 | 1.0858  | 3.1653   | -1.5436 | Down | 6.85E-05  | 1.34E-04  |
| Unigene60557  | Potri.005G020800.3 | 2.8563  | 8.3267   | -1.5436 | Down | 6.85E-05  | 1.34E-04  |
| Unigene60948  | Potri.004G208400.1 | 1.7     | 4.9558   | -1.5436 | Down | 6.85E-05  | 1.34E-04  |
| Unigene46238  | Potri.004G176300.1 | 6.4484  | 18.7985  | -1.5436 | Down | 4.10E-12  | 1.31E-11  |
| Unigene21290  | Potri.003G198000.1 | 3.2352  | 9.4312   | -1.5436 | Down | 1.13E-15  | 4.24E-15  |
| Unigene40564  | Potri.001G193600.1 | 1.7325  | 5.0506   | -1.5436 | Down | 6.85E-05  | 1.34E-04  |
| Unigene35235  | Potri.009G137800.4 | 57.9969 | 169.0879 | -1.5437 | Down | 5.41E-110 | 1.31E-108 |
| Unigene17665  | Potri.007G115400.1 | 1.3155  | 3.8351   | -1.5437 | Down | 6.85E-05  | 1.34E-04  |
| Unigene64762  | Potri.018G030300.1 | 12.2556 | 35.7361  | -1.5439 | Down | 1.09E-20  | 4.97E-20  |

|               |                    |         |          |         |      |           |           |
|---------------|--------------------|---------|----------|---------|------|-----------|-----------|
| Unigene36632  | Potri.008G018600.1 | 15.1703 | 44.2337  | -1.5439 | Down | 3.18E-24  | 1.63E-23  |
| Unigene40021  | Potri.015G056000.1 | 15.3512 | 44.7641  | -1.544  | Down | 8.60E-52  | 8.72E-51  |
| Unigene33853  | Potri.001G161900.3 | 18.1045 | 52.7969  | -1.5441 | Down | 3.00E-53  | 3.13E-52  |
| Unigene21602  | Potri.002G177100.1 | 15.0292 | 43.8333  | -1.5443 | Down | 4.97E-121 | 1.36E-119 |
| Unigene18647  | Potri.001G101300.1 | 2.6142  | 7.6249   | -1.5443 | Down | 5.08E-10  | 1.45E-09  |
| Unigene7378   | Potri.004G141000.1 | 5.499   | 16.0405  | -1.5445 | Down | 1.27E-23  | 6.38E-23  |
| Unigene108093 | Potri.010G199100.2 | 11.8267 | 34.5005  | -1.5446 | Down | 4.55E-15  | 1.66E-14  |
| Unigene3318   | Potri.010G014700.3 | 3.0344  | 8.8525   | -1.5447 | Down | 4.38E-20  | 1.95E-19  |
| Unigene14420  | Potri.010G009600.1 | 16.9954 | 49.5834  | -1.5447 | Down | 4.36E-25  | 2.29E-24  |
| Unigene34869  | Potri.009G094800.1 | 7.7861  | 22.7155  | -1.5447 | Down | 6.31E-72  | 9.14E-71  |
| Unigene2502   | Potri.018G090300.1 | 2.6563  | 7.7509   | -1.5449 | Down | 2.07E-06  | 4.63E-06  |
| Unigene24982  | Potri.018G053900.1 | 1.6701  | 4.8732   | -1.5449 | Down | 2.07E-06  | 4.63E-06  |
| Unigene24307  | Potri.011G111500.2 | 2.7629  | 8.0618   | -1.5449 | Down | 1.66E-11  | 5.15E-11  |
| Unigene20327  | Potri.009G005700.1 | 14.5796 | 42.5413  | -1.5449 | Down | 1.50E-26  | 8.21E-26  |
| Unigene49955  | Potri.003G197700.2 | 4.8258  | 14.0811  | -1.5449 | Down | 1.49E-21  | 6.99E-21  |
| Unigene52160  | Potri.002G219300.1 | 3.5453  | 10.3447  | -1.5449 | Down | 1.66E-11  | 5.15E-11  |
| Unigene9970   | Potri.004G082300.1 | 33.0629 | 96.4803  | -1.545  | Down | 3.61E-84  | 6.26E-83  |
| Unigene12982  | Potri.010G138900.1 | 30.9827 | 90.4167  | -1.5451 | Down | 2.21E-108 | 5.23E-107 |
| Unigene23183  | Potri.001G249100.1 | 55.218  | 161.1348 | -1.5451 | Down | 9.09E-127 | 2.61E-125 |
| Unigene54090  | Potri.010G002300.1 | 12.9822 | 37.8889  | -1.5452 | Down | 1.77E-29  | 1.06E-28  |
| Unigene18288  | Potri.003G181000.1 | 12.481  | 36.4243  | -1.5452 | Down | 7.95E-56  | 8.75E-55  |
| Unigene106295 | Potri.007G010600.3 | 1.6829  | 4.9119   | -1.5453 | Down | 5.51E-13  | 1.84E-12  |
| Unigene48099  | Potri.006G109300.2 | 15.14   | 44.1889  | -1.5453 | Down | 1.74E-24  | 8.98E-24  |
| Unigene6907   | Potri.001G168200.1 | 6.1606  | 17.9808  | -1.5453 | Down | 5.51E-13  | 1.84E-12  |
| Unigene18444  | Potri.017G057800.1 | 5.0836  | 14.8386  | -1.5454 | Down | 1.76E-19  | 7.67E-19  |
| Unigene11940  | Potri.013G047600.3 | 3.8882  | 11.3493  | -1.5454 | Down | 1.76E-19  | 7.67E-19  |
| Unigene44739  | Potri.006G057200.1 | 6.5586  | 19.1452  | -1.5455 | Down | 7.61E-39  | 5.80E-38  |
| Unigene25618  | Potri.019G041300.3 | 4.1444  | 12.0988  | -1.5456 | Down | 6.47E-08  | 1.63E-07  |
| Unigene3403   | Potri.017G033200.6 | 4.5703  | 13.3421  | -1.5456 | Down | 6.47E-08  | 1.63E-07  |
| Unigene94542  | Potri.014G168100.1 | 4.2985  | 12.5485  | -1.5456 | Down | 6.47E-08  | 1.63E-07  |
| Unigene3675   | Potri.013G062500.4 | 1.6905  | 4.935    | -1.5456 | Down | 6.47E-08  | 1.63E-07  |
| Unigene7529   | Potri.013G005200.2 | 3.1766  | 9.2735   | -1.5456 | Down | 1.84E-14  | 6.54E-14  |
| Unigene6918   | Potri.010G001300.4 | 26.9137 | 78.5657  | -1.5456 | Down | 1.03E-51  | 1.04E-50  |
| Unigene6506   | Potri.007G092400.1 | 16.4245 | 47.9483  | -1.5456 | Down | 7.29E-34  | 4.91E-33  |
| Unigene3731   | Potri.006G060200.2 | 9.5168  | 27.7824  | -1.5456 | Down | 1.84E-14  | 6.54E-14  |
| Unigene9687   | Potri.004G235300.3 | 2.2988  | 6.7108   | -1.5456 | Down | 6.47E-08  | 1.63E-07  |
| Unigene105560 | Potri.002G235400.1 | 1.3125  | 3.8315   | -1.5456 | Down | 6.47E-08  | 1.63E-07  |
| Unigene19897  | Potri.002G233300.1 | 3.019   | 8.8135   | -1.5456 | Down | 1.84E-14  | 6.54E-14  |
| Unigene34578  | Potri.001G246700.1 | 1.4939  | 4.3612   | -1.5456 | Down | 6.47E-08  | 1.63E-07  |



|               |                     |          |          |         |      |           |           |
|---------------|---------------------|----------|----------|---------|------|-----------|-----------|
| Unigene22699  | Potri.001G108400.1  | 1.7232   | 5.0306   | -1.5456 | Down | 6.47E-08  | 1.63E-07  |
| Unigene40358  | Potri.018G106100.1  | 22.2152  | 64.8577  | -1.5457 | Down | 2.52E-35  | 1.76E-34  |
| Unigene44107  | Potri.012G109600.1  | 8.8695   | 25.8943  | -1.5457 | Down | 3.37E-48  | 3.18E-47  |
| Unigene65798  | Potri.011G110900.4  | 4.5247   | 13.2098  | -1.5457 | Down | 9.16E-42  | 7.49E-41  |
| Unigene41555  | Potri.002G110900.3  | 22.0822  | 64.4689  | -1.5457 | Down | 9.16E-42  | 7.49E-41  |
| Unigene6457   | Potri.013G059800.4  | 12.5934  | 36.7674  | -1.5458 | Down | 7.07E-29  | 4.16E-28  |
| Unigene35004  | Potri.002G254700.11 | 6.8723   | 20.0658  | -1.5459 | Down | 2.44E-30  | 1.49E-29  |
| Unigene17469  | Potri.015G041800.1  | 33.254   | 97.107   | -1.546  | Down | 5.31E-87  | 9.57E-86  |
| Unigene44259  | Potri.015G010200.3  | 10.4612  | 30.547   | -1.546  | Down | 8.41E-32  | 5.37E-31  |
| Unigene40419  | Potri.019G041900.1  | 8.831    | 25.7886  | -1.5461 | Down | 2.08E-17  | 8.39E-17  |
| Unigene57340  | Potri.002G111900.1  | 2.9345   | 8.5695   | -1.5461 | Down | 2.08E-09  | 5.73E-09  |
| Unigene36914  | Potri.001G470300.4  | 5.0985   | 14.8888  | -1.5461 | Down | 2.08E-09  | 5.73E-09  |
| Unigene23266  | Potri.018G129800.1  | 13.7283  | 40.0922  | -1.5462 | Down | 1.00E-34  | 6.91E-34  |
| Unigene53012  | Potri.008G050400.1  | 5.3797   | 15.7134  | -1.5464 | Down | 6.77E-11  | 2.03E-10  |
| Unigene71683  | Potri.008G226200.2  | 17.7356  | 51.8074  | -1.5465 | Down | 8.16E-22  | 3.86E-21  |
| Unigene87418  | Potri.002G113600.2  | 28.2107  | 82.4051  | -1.5465 | Down | 2.25E-51  | 2.26E-50  |
| Unigene30872  | Potri.019G101800.1  | 6.8055   | 19.8811  | -1.5466 | Down | 2.79E-23  | 1.38E-22  |
| Unigene32024  | Potri.008G195900.3  | 2.2066   | 6.4461   | -1.5466 | Down | 2.79E-23  | 1.38E-22  |
| Unigene115326 | Potri.009G046300.2  | 27.9422  | 81.6306  | -1.5467 | Down | 2.11E-46  | 1.91E-45  |
| Unigene84620  | Potri.015G105100.1  | 116.1615 | 339.4215 | -1.5469 | Down | 1.05E-182 | 4.90E-181 |
| Unigene24239  | Potri.006G135400.1  | 3.6096   | 10.5471  | -1.5469 | Down | 2.49E-15  | 9.18E-15  |
| Unigene17187  | Potri.004G190600.2  | 7.5426   | 22.0406  | -1.547  | Down | 8.37E-17  | 3.29E-16  |
| Unigene11738  | Potri.013G001200.1  | 10.9774  | 32.0782  | -1.5471 | Down | 4.76E-79  | 7.71E-78  |
| Unigene8466   | Potri.005G142700.1  | 4.2812   | 12.511   | -1.5471 | Down | 2.83E-18  | 1.18E-17  |
| Unigene1274   | Potri.001G011900.1  | 12.1941  | 35.6343  | -1.5471 | Down | 1.59E-33  | 1.06E-32  |
| Unigene30779  | Potri.002G252600.1  | 44.1099  | 128.9087 | -1.5472 | Down | 3.09E-89  | 5.74E-88  |
| Unigene7171   | Potri.001G353100.1  | 20.5204  | 59.9724  | -1.5472 | Down | 2.29E-39  | 1.77E-38  |
| Unigene32374  | Potri.005G092000.1  | 3.7152   | 10.8587  | -1.5473 | Down | 1.12E-22  | 5.42E-22  |
| Unigene40468  | Potri.006G190500.4  | 5.4585   | 15.9543  | -1.5474 | Down | 3.82E-24  | 1.95E-23  |
| Unigene13801  | Potri.019G053200.1  | 10.1455  | 29.6567  | -1.5475 | Down | 5.33E-30  | 3.23E-29  |
| Unigene28694  | Potri.013G150000.1  | 6.5194   | 19.0563  | -1.5475 | Down | 4.49E-27  | 2.51E-26  |
| Unigene51377  | Potri.010G198300.6  | 12.0675  | 35.2757  | -1.5475 | Down | 1.84E-31  | 1.16E-30  |
| Unigene76583  | Potri.006G273300.1  | 30.3983  | 88.8677  | -1.5477 | Down | 3.16E-40  | 2.49E-39  |
| Unigene21918  | Potri.004G129000.1  | 3.7039   | 10.8283  | -1.5477 | Down | 3.81E-43  | 3.21E-42  |
| Unigene83428  | Potri.002G246600.14 | 41.182   | 120.4062 | -1.5478 | Down | 1.49E-63  | 1.89E-62  |
| Unigene32205  | Potri.002G216600.5  | 8.0634   | 23.5757  | -1.5478 | Down | 6.38E-68  | 8.68E-67  |
| Unigene21427  | Potri.001G443200.3  | 10.4462  | 30.5416  | -1.5478 | Down | 3.57E-112 | 8.84E-111 |
| Unigene70214  | Potri.001G249000.1  | 5.4269   | 15.8676  | -1.5479 | Down | 2.17E-85  | 3.83E-84  |
| Unigene32241  | Potri.017G111400.4  | 26.8781  | 78.5936  | -1.548  | Down | 5.24E-161 | 2.06E-159 |

|               |                    |         |         |         |      |           |           |
|---------------|--------------------|---------|---------|---------|------|-----------|-----------|
| Unigene3080   | Potri.011G094100.4 | 1.8007  | 5.2656  | -1.548  | Down | 8.66E-06  | 1.84E-05  |
| Unigene105261 | Potri.007G016300.1 | 1.7349  | 5.0732  | -1.548  | Down | 2.95E-04  | 5.37E-04  |
| Unigene118112 | Potri.T030600.1    | 3.1997  | 9.3568  | -1.5481 | Down | 8.51E-09  | 2.26E-08  |
| Unigene28326  | Potri.015G130900.1 | 8.8208  | 25.7946 | -1.5481 | Down | 3.37E-16  | 1.29E-15  |
| Unigene118190 | Potri.015G099900.1 | 1.2613  | 3.6885  | -1.5481 | Down | 2.95E-04  | 5.37E-04  |
| Unigene10518  | Potri.014G079100.2 | 3.1332  | 9.1622  | -1.5481 | Down | 2.76E-10  | 8.00E-10  |
| Unigene81705  | Potri.012G141000.1 | 3.0597  | 8.9475  | -1.5481 | Down | 8.66E-06  | 1.84E-05  |
| Unigene107674 | Potri.012G074300.2 | 9.0479  | 26.4586 | -1.5481 | Down | 9.06E-12  | 2.84E-11  |
| Unigene2259   | Potri.011G154700.1 | 1.2593  | 3.6826  | -1.5481 | Down | 8.66E-06  | 1.84E-05  |
| Unigene114938 | Potri.010G184500.2 | 9.3583  | 27.3663 | -1.5481 | Down | 3.37E-16  | 1.29E-15  |
| Unigene31352  | Potri.010G146000.1 | 2.838   | 8.2991  | -1.5481 | Down | 2.68E-07  | 6.44E-07  |
| Unigene8607   | Potri.009G017400.4 | 20.7102 | 60.5624 | -1.5481 | Down | 1.52E-42  | 1.26E-41  |
| Unigene104924 | Potri.009G006100.1 | 1.2088  | 3.5348  | -1.5481 | Down | 2.68E-07  | 6.44E-07  |
| Unigene2616   | Potri.008G172800.1 | 27.8899 | 81.5577 | -1.5481 | Down | 3.10E-70  | 4.37E-69  |
| Unigene111750 | Potri.008G151100.2 | 2.2127  | 6.4705  | -1.5481 | Down | 2.95E-04  | 5.37E-04  |
| Unigene32331  | Potri.008G114200.1 | 16.0081 | 46.8119 | -1.5481 | Down | 5.27E-44  | 4.52E-43  |
| Unigene44206  | Potri.006G247400.1 | 5.8151  | 17.0049 | -1.5481 | Down | 3.37E-16  | 1.29E-15  |
| Unigene106322 | Potri.006G218800.1 | 1.3344  | 3.9021  | -1.5481 | Down | 8.66E-06  | 1.84E-05  |
| Unigene48227  | Potri.006G162900.2 | 18.7334 | 54.7816 | -1.5481 | Down | 5.23E-25  | 2.74E-24  |
| Unigene5958   | Potri.006G133200.5 | 15.5879 | 45.5832 | -1.5481 | Down | 3.85E-19  | 1.66E-18  |
| Unigene94659  | Potri.004G116500.1 | 3.4205  | 10.0024 | -1.5481 | Down | 8.66E-06  | 1.84E-05  |
| Unigene30659  | Potri.003G174000.1 | 1.5269  | 4.465   | -1.5481 | Down | 2.95E-04  | 5.37E-04  |
| Unigene114338 | Potri.003G078400.1 | 1.9485  | 5.6979  | -1.5481 | Down | 2.95E-04  | 5.37E-04  |
| Unigene26510  | Potri.003G044500.1 | 1.6845  | 4.9259  | -1.5481 | Down | 2.95E-04  | 5.37E-04  |
| Unigene95477  | Potri.002G245400.1 | 9.5102  | 27.8103 | -1.5481 | Down | 1.14E-17  | 4.63E-17  |
| Unigene103340 | Potri.002G067900.1 | 1.6067  | 4.6986  | -1.5481 | Down | 2.95E-04  | 5.37E-04  |
| Unigene7706   | Potri.002G006100.1 | 2.9264  | 8.5575  | -1.5481 | Down | 1.00E-14  | 3.61E-14  |
| Unigene2652   | Potri.001G405700.2 | 3.011   | 8.805   | -1.5481 | Down | 9.06E-12  | 2.84E-11  |
| Unigene39744  | Potri.001G403400.1 | 1.649   | 4.8222  | -1.5481 | Down | 8.66E-06  | 1.84E-05  |
| Unigene37883  | Potri.001G259900.1 | 1.8132  | 5.3022  | -1.5481 | Down | 2.95E-04  | 5.37E-04  |
| Unigene5166   | Potri.001G117800.1 | 1.2287  | 3.593   | -1.5481 | Down | 2.95E-04  | 5.37E-04  |
| Unigene32929  | Potri.013G154500.1 | 10.8687 | 31.7874 | -1.5483 | Down | 3.40E-84  | 5.91E-83  |
| Unigene19975  | Potri.014G159300.4 | 14.9659 | 43.782  | -1.5487 | Down | 8.48E-29  | 4.97E-28  |
| Unigene50498  | Potri.001G246100.1 | 9.1123  | 26.6592 | -1.5487 | Down | 1.22E-48  | 1.16E-47  |
| Unigene14317  | Potri.008G198000.1 | 31.083  | 90.9376 | -1.5488 | Down | 1.22E-48  | 1.16E-47  |
| Unigene1614   | Potri.001G350200.1 | 24.2086 | 70.8297 | -1.5488 | Down | 1.55E-106 | 3.57E-105 |
| Unigene344    | Potri.016G073000.1 | 7.6393  | 22.3528 | -1.5489 | Down | 8.68E-57  | 9.72E-56  |
| Unigene76811  | Potri.006G149500.1 | 15.5415 | 45.4727 | -1.5489 | Down | 1.79E-21  | 8.36E-21  |
| Unigene46769  | Potri.007G082000.3 | 10.2228 | 29.9157 | -1.5491 | Down | 4.57E-17  | 1.82E-16  |

|               |                    |         |         |         |      |           |           |
|---------------|--------------------|---------|---------|---------|------|-----------|-----------|
| Unigene42742  | Potri.010G090200.2 | 5.7804  | 16.9168 | -1.5492 | Down | 1.15E-43  | 9.79E-43  |
| Unigene25001  | Potri.007G009600.7 | 4.1215  | 12.063  | -1.5493 | Down | 4.05E-14  | 1.42E-13  |
| Unigene32381  | Potri.003G066200.1 | 3.0559  | 8.9443  | -1.5494 | Down | 2.75E-39  | 2.12E-38  |
| Unigene34737  | Potri.003G052100.1 | 6.4496  | 18.8778 | -1.5494 | Down | 2.03E-61  | 2.47E-60  |
| Unigene18350  | Potri.005G225600.1 | 4.0427  | 11.8337 | -1.5495 | Down | 6.60E-35  | 4.56E-34  |
| Unigene17880  | Potri.008G202800.1 | 1.605   | 4.6989  | -1.5497 | Down | 3.68E-11  | 1.12E-10  |
| Unigene53179  | Potri.008G086400.2 | 22.2569 | 65.1563 | -1.5497 | Down | 5.53E-32  | 3.54E-31  |
| Unigene53111  | Potri.005G180700.1 | 7.6257  | 22.3251 | -1.5497 | Down | 3.68E-11  | 1.12E-10  |
| Unigene34988  | Potri.005G111100.1 | 15.4086 | 45.1082 | -1.5497 | Down | 5.53E-32  | 3.54E-31  |
| Unigene39914  | Potri.001G298400.1 | 2.2969  | 6.7244  | -1.5497 | Down | 3.68E-11  | 1.12E-10  |
| Unigene31614  | Potri.001G060000.1 | 2.7496  | 8.0499  | -1.5497 | Down | 3.68E-11  | 1.12E-10  |
| Unigene21814  | Potri.004G204300.1 | 7.2712  | 21.2886 | -1.5498 | Down | 4.65E-29  | 2.75E-28  |
| Unigene42816  | Potri.017G035700.1 | 2.411   | 7.0592  | -1.5499 | Down | 2.11E-19  | 9.18E-19  |
| Unigene14124  | Potri.013G128600.2 | 16.9543 | 49.6405 | -1.5499 | Down | 5.42E-55  | 5.85E-54  |
| Unigene377    | Potri.004G217200.3 | 11.5917 | 33.941  | -1.5499 | Down | 8.07E-70  | 1.13E-68  |
| Unigene32755  | Potri.001G228000.1 | 4.1755  | 12.2256 | -1.5499 | Down | 2.19E-45  | 1.94E-44  |
| Unigene54727  | Potri.012G031600.1 | 2.1858  | 6.4006  | -1.55   | Down | 6.21E-18  | 2.56E-17  |
| Unigene49190  | Potri.007G001800.1 | 3.6921  | 10.8112 | -1.55   | Down | 1.13E-09  | 3.15E-09  |
| Unigene33032  | Potri.003G108000.5 | 1.7569  | 5.1445  | -1.55   | Down | 1.13E-09  | 3.15E-09  |
| Unigene30654  | Potri.001G179100.1 | 20.1108 | 58.8889 | -1.55   | Down | 3.93E-26  | 2.13E-25  |
| Unigene49314  | Potri.018G050800.1 | 10.5258 | 30.8239 | -1.5501 | Down | 7.60E-33  | 4.99E-32  |
| Unigene98082  | Potri.003G051500.3 | 3.7039  | 10.8472 | -1.5502 | Down | 1.84E-16  | 7.14E-16  |
| Unigene12968  | Potri.011G152700.2 | 4.9255  | 14.4255 | -1.5503 | Down | 3.34E-23  | 1.65E-22  |
| Unigene21490  | Potri.005G092700.2 | 3.8312  | 11.2205 | -1.5503 | Down | 4.34E-38  | 3.25E-37  |
| Unigene23794  | Potri.002G131200.1 | 22.484  | 65.8524 | -1.5503 | Down | 7.48E-65  | 9.68E-64  |
| Unigene24073  | Potri.016G127600.1 | 2.6643  | 7.8038  | -1.5504 | Down | 3.50E-08  | 8.96E-08  |
| Unigene46108  | Potri.016G047900.1 | 3.0962  | 9.069   | -1.5504 | Down | 5.47E-15  | 1.99E-14  |
| Unigene42373  | Potri.012G066900.1 | 8.0019  | 23.438  | -1.5504 | Down | 1.52E-223 | 9.00E-222 |
| Unigene21555  | Potri.016G043500.1 | 4.0876  | 11.973  | -1.5505 | Down | 5.47E-15  | 1.99E-14  |
| Unigene16594  | Potri.010G211300.1 | 4.0876  | 11.973  | -1.5505 | Down | 3.50E-08  | 8.96E-08  |
| Unigene594    | Potri.003G139300.1 | 12.4556 | 36.4858 | -1.5505 | Down | 2.08E-40  | 1.65E-39  |
| Unigene52408  | Potri.002G205600.1 | 2.9544  | 8.6537  | -1.5505 | Down | 3.50E-08  | 8.96E-08  |
| Unigene18145  | Potri.002G077900.3 | 1.9503  | 5.7126  | -1.5505 | Down | 3.50E-08  | 8.96E-08  |
| Unigene11168  | Potri.013G076200.1 | 11.964  | 35.0462 | -1.5506 | Down | 1.04E-65  | 1.36E-64  |
| Unigene22778  | Potri.018G056400.2 | 3.9964  | 11.7081 | -1.5507 | Down | 1.64E-13  | 5.59E-13  |
| Unigene36809  | Potri.004G033800.1 | 24.5303 | 71.8627 | -1.5507 | Down | 3.03E-32  | 1.96E-31  |
| Unigene6880   | Potri.003G140900.1 | 6.3846  | 18.7048 | -1.5507 | Down | 1.64E-13  | 5.59E-13  |
| Unigene3616   | Potri.002G106300.3 | 6.2716  | 18.3738 | -1.5507 | Down | 1.64E-13  | 5.59E-13  |
| Unigene117577 | Potri.005G081900.1 | 22.2789 | 65.2738 | -1.5508 | Down | 5.79E-48  | 5.43E-47  |

|               |                    |          |          |         |      |           |           |
|---------------|--------------------|----------|----------|---------|------|-----------|-----------|
| Unigene8009   | Potri.004G100500.1 | 5.1354   | 15.0452  | -1.5508 | Down | 1.64E-13  | 5.59E-13  |
| Unigene90083  | Potri.006G279900.1 | 28.2755  | 82.855   | -1.551  | Down | 9.63E-61  | 1.16E-59  |
| Unigene73544  | Potri.012G000900.4 | 8.8388   | 25.9014  | -1.5511 | Down | 4.93E-12  | 1.57E-11  |
| Unigene37599  | Potri.006G239900.2 | 7.7065   | 22.5834  | -1.5511 | Down | 4.93E-12  | 1.57E-11  |
| Unigene3291   | Potri.004G190400.1 | 7.4244   | 21.7579  | -1.5512 | Down | 4.66E-63  | 5.85E-62  |
| Unigene1647   | Potri.011G024800.4 | 7.1968   | 21.0931  | -1.5513 | Down | 3.92E-21  | 1.81E-20  |
| Unigene32549  | Potri.011G142900.1 | 5.6197   | 16.4718  | -1.5514 | Down | 1.90E-44  | 1.65E-43  |
| Unigene12349  | Potri.006G232300.4 | 33.9655  | 99.565   | -1.5516 | Down | 5.31E-70  | 7.46E-69  |
| Unigene28250  | Potri.003G099800.1 | 3.5881   | 10.5183  | -1.5516 | Down | 1.50E-10  | 4.41E-10  |
| Unigene1038   | Potri.014G038900.1 | 3.5488   | 10.4035  | -1.5517 | Down | 1.57E-41  | 1.28E-40  |
| Unigene32144  | Potri.002G192900.7 | 11.7195  | 34.3577  | -1.5517 | Down | 4.34E-67  | 5.83E-66  |
| Unigene16163  | Potri.004G035200.2 | 27.0866  | 79.4136  | -1.5518 | Down | 7.38E-53  | 7.64E-52  |
| Unigene21568  | Potri.010G162500.5 | 4.2216   | 12.378   | -1.5519 | Down | 7.91E-35  | 5.45E-34  |
| Unigene111561 | Potri.017G059000.1 | 36.662   | 107.504  | -1.552  | Down | 6.08E-50  | 5.93E-49  |
| Unigene6370   | Potri.019G056700.2 | 21.6607  | 63.5217  | -1.5522 | Down | 2.93E-52  | 3.00E-51  |
| Unigene47458  | Potri.018G026400.4 | 30.7849  | 90.2791  | -1.5522 | Down | 2.93E-52  | 3.00E-51  |
| Unigene15919  | Potri.018G018600.2 | 2.2682   | 6.6523   | -1.5523 | Down | 3.66E-05  | 7.33E-05  |
| Unigene20161  | Potri.016G119300.5 | 3.4697   | 10.1761  | -1.5523 | Down | 4.61E-09  | 1.25E-08  |
| Unigene72249  | Potri.012G042700.1 | 16.2959  | 47.7931  | -1.5523 | Down | 1.57E-20  | 7.12E-20  |
| Unigene66483  | Potri.010G099100.2 | 3.2434   | 9.5124   | -1.5523 | Down | 4.61E-09  | 1.25E-08  |
| Unigene85759  | Potri.008G041300.2 | 6.8743   | 20.1612  | -1.5523 | Down | 6.62E-13  | 2.19E-12  |
| Unigene9351   | Potri.006G105800.1 | 1.2479   | 3.66     | -1.5523 | Down | 3.66E-05  | 7.33E-05  |
| Unigene53009  | Potri.005G235400.1 | 2.8449   | 8.3435   | -1.5523 | Down | 3.66E-05  | 7.33E-05  |
| Unigene17597  | Potri.005G210800.1 | 3.6489   | 10.7015  | -1.5523 | Down | 4.61E-09  | 1.25E-08  |
| Unigene110672 | Potri.005G001200.1 | 8.9519   | 26.2543  | -1.5523 | Down | 6.62E-13  | 2.19E-12  |
| Unigene4788   | Potri.004G043500.1 | 1.5294   | 4.4854   | -1.5523 | Down | 3.66E-05  | 7.33E-05  |
| Unigene90222  | Potri.001G107500.1 | 101.7802 | 298.5034 | -1.5523 | Down | 1.73E-216 | 9.88E-215 |
| Unigene19237  | Potri.001G054900.1 | 6.3579   | 18.6465  | -1.5523 | Down | 1.57E-20  | 7.12E-20  |
| Unigene38245  | Potri.001G051700.1 | 3.8147   | 11.1879  | -1.5523 | Down | 1.57E-20  | 7.12E-20  |
| Unigene94845  | Potri.006G063200.1 | 7.1591   | 21       | -1.5525 | Down | 1.18E-26  | 6.49E-26  |
| Unigene19139  | Potri.009G080200.1 | 8.5996   | 25.2274  | -1.5527 | Down | 4.62E-19  | 1.99E-18  |
| Unigene24145  | Potri.014G074200.2 | 4.6889   | 13.7566  | -1.5528 | Down | 7.18E-39  | 5.47E-38  |
| Unigene44616  | Potri.008G213200.2 | 23.2967  | 68.3549  | -1.5529 | Down | 3.44E-41  | 2.77E-40  |
| Unigene22181  | Potri.003G087200.1 | 13.8572  | 40.6573  | -1.5529 | Down | 7.77E-55  | 8.36E-54  |
| Unigene41248  | Potri.001G289800.1 | 8.1161   | 23.8135  | -1.5529 | Down | 2.00E-11  | 6.17E-11  |
| Unigene50634  | Potri.017G058300.3 | 27.8777  | 81.8035  | -1.5531 | Down | 2.90E-107 | 6.76E-106 |
| Unigene42819  | Potri.017G001900.1 | 8.0597   | 23.6517  | -1.5531 | Down | 5.93E-74  | 8.86E-73  |
| Unigene53754  | Potri.001G241700.1 | 10.5382  | 30.9232  | -1.5531 | Down | 1.36E-17  | 5.54E-17  |
| Unigene13176  | Potri.010G102700.1 | 10.041   | 29.4669  | -1.5532 | Down | 3.49E-70  | 4.92E-69  |

|               |                    |         |          |         |      |           |           |
|---------------|--------------------|---------|----------|---------|------|-----------|-----------|
| Unigene841    | Potri.006G197200.1 | 4.9454  | 14.5128  | -1.5532 | Down | 4.06E-86  | 7.25E-85  |
| Unigene77366  | Potri.T175500.1    | 9.3653  | 27.486   | -1.5533 | Down | 8.92E-14  | 3.08E-13  |
| Unigene52191  | Potri.018G006400.4 | 9.8335  | 28.8603  | -1.5533 | Down | 6.30E-20  | 2.80E-19  |
| Unigene94508  | Potri.010G068400.3 | 7.6616  | 22.4853  | -1.5533 | Down | 1.16E-84  | 2.03E-83  |
| Unigene26744  | Potri.009G036700.1 | 23.4421 | 68.8001  | -1.5533 | Down | 2.28E-44  | 1.97E-43  |
| Unigene45445  | Potri.008G001200.1 | 10.1282 | 29.725   | -1.5533 | Down | 1.22E-62  | 1.51E-61  |
| Unigene51265  | Potri.007G113300.1 | 18.4117 | 54.0363  | -1.5533 | Down | 4.71E-26  | 2.54E-25  |
| Unigene20349  | Potri.004G020200.1 | 2.0106  | 5.9008   | -1.5533 | Down | 1.44E-07  | 3.55E-07  |
| Unigene51918  | Potri.002G084400.1 | 26.1874 | 76.8542  | -1.5533 | Down | 1.69E-72  | 2.48E-71  |
| Unigene79229  | Potri.011G070900.2 | 43.7999 | 128.5593 | -1.5534 | Down | 3.48E-61  | 4.22E-60  |
| Unigene33278  | Potri.010G001700.2 | 9.9925  | 29.3292  | -1.5534 | Down | 1.30E-126 | 3.75E-125 |
| Unigene15750  | Potri.002G110500.1 | 50.2285 | 147.4279 | -1.5534 | Down | 6.52E-94  | 1.28E-92  |
| Unigene15163  | Potri.004G160400.1 | 15.6882 | 46.0491  | -1.5535 | Down | 2.93E-22  | 1.40E-21  |
| Unigene32473  | Potri.001G471800.4 | 6.3682  | 18.6924  | -1.5535 | Down | 6.55E-43  | 5.49E-42  |
| Unigene24150  | Potri.016G099800.1 | 8.97    | 26.3321  | -1.5536 | Down | 2.58E-93  | 5.04E-92  |
| Unigene20678  | Potri.015G032900.1 | 7.968   | 23.3895  | -1.5536 | Down | 4.04E-16  | 1.55E-15  |
| Unigene44196  | Potri.001G159000.2 | 13.5219 | 39.6926  | -1.5536 | Down | 3.14E-45  | 2.77E-44  |
| Unigene63144  | Potri.010G176500.1 | 2.794   | 8.2026   | -1.5537 | Down | 6.11E-10  | 1.74E-09  |
| Unigene45651  | Potri.005G251700.1 | 4.2997  | 12.623   | -1.5537 | Down | 6.46E-27  | 3.58E-26  |
| Unigene17497  | Potri.007G097900.3 | 3.6568  | 10.7358  | -1.5538 | Down | 6.11E-10  | 1.74E-09  |
| Unigene74512  | Potri.006G229300.9 | 96.7025 | 283.901  | -1.5538 | Down | 2.43E-119 | 6.50E-118 |
| Unigene78003  | Potri.001G369200.1 | 8.1294  | 23.8707  | -1.554  | Down | 2.68E-12  | 8.64E-12  |
| Unigene2667   | Potri.011G045300.9 | 14.0317 | 41.2058  | -1.5542 | Down | 1.39E-51  | 1.41E-50  |
| Unigene59655  | Potri.010G106700.2 | 5.6681  | 16.6453  | -1.5542 | Down | 1.20E-14  | 4.32E-14  |
| Unigene80387  | Potri.018G115500.1 | 48.8805 | 143.5649 | -1.5544 | Down | 4.18E-70  | 5.88E-69  |
| Unigene42979  | Potri.018G074100.2 | 10.9311 | 32.1097  | -1.5546 | Down | 2.67E-53  | 2.79E-52  |
| Unigene7601   | Potri.017G085600.1 | 6.8565  | 20.1418  | -1.5546 | Down | 2.74E-33  | 1.82E-32  |
| Unigene85811  | Potri.016G134700.1 | 55.6956 | 163.6112 | -1.5546 | Down | 4.28E-94  | 8.47E-93  |
| Unigene23897  | Potri.005G148200.1 | 6.6588  | 19.5602  | -1.5546 | Down | 1.22E-28  | 7.10E-28  |
| Unigene42915  | Potri.001G453200.1 | 7.5302  | 22.1208  | -1.5546 | Down | 2.74E-33  | 1.82E-32  |
| Unigene21897  | Potri.001G215700.2 | 9.9588  | 29.2572  | -1.5547 | Down | 3.30E-47  | 3.04E-46  |
| Unigene53108  | Potri.018G123700.2 | 3.6633  | 10.7639  | -1.555  | Down | 4.65E-06  | 1.01E-05  |
| Unigene41843  | Potri.013G102900.1 | 14.8299 | 43.5743  | -1.555  | Down | 1.67E-29  | 1.00E-28  |
| Unigene41882  | Potri.013G079200.1 | 4.1867  | 12.3016  | -1.555  | Down | 1.89E-08  | 4.94E-08  |
| Unigene53018  | Potri.010G038700.2 | 6.5999  | 19.3923  | -1.555  | Down | 1.63E-15  | 6.06E-15  |
| Unigene13782  | Potri.009G137400.1 | 1.5112  | 4.4404   | -1.555  | Down | 4.65E-06  | 1.01E-05  |
| Unigene46823  | Potri.008G072100.1 | 19.2111 | 56.4474  | -1.555  | Down | 3.77E-34  | 2.56E-33  |
| Unigene65647  | Potri.006G164400.1 | 6.3776  | 18.7392  | -1.555  | Down | 1.63E-15  | 6.06E-15  |
| Unigene108833 | Potri.004G196400.4 | 5.8614  | 17.2222  | -1.555  | Down | 1.89E-08  | 4.94E-08  |

|              |                    |          |          |         |      |           |           |
|--------------|--------------------|----------|----------|---------|------|-----------|-----------|
| Unigene36510 | Potri.003G074200.6 | 10.657   | 31.3131  | -1.555  | Down | 3.44E-20  | 1.54E-19  |
| Unigene64790 | Potri.013G075300.2 | 9.8589   | 28.9735  | -1.5552 | Down | 1.18E-39  | 9.21E-39  |
| Unigene52214 | Potri.001G349300.3 | 23.6903  | 69.6182  | -1.5552 | Down | 3.03E-51  | 3.04E-50  |
| Unigene34161 | Potri.001G305800.1 | 5.5533   | 16.32    | -1.5552 | Down | 1.18E-39  | 9.21E-39  |
| Unigene31161 | Potri.010G034300.1 | 40.4258  | 118.8135 | -1.5554 | Down | 9.73E-81  | 1.61E-79  |
| Unigene16533 | Potri.009G168000.4 | 11.0398  | 32.4484  | -1.5554 | Down | 2.19E-23  | 1.09E-22  |
| Unigene49520 | Potri.014G161600.2 | 7.0377   | 20.6883  | -1.5556 | Down | 2.21E-16  | 8.53E-16  |
| Unigene6351  | Potri.014G013100.1 | 9.1293   | 26.837   | -1.5556 | Down | 2.21E-16  | 8.53E-16  |
| Unigene12808 | Potri.013G040700.4 | 11.2059  | 32.9415  | -1.5556 | Down | 3.16E-31  | 1.99E-30  |
| Unigene31410 | Potri.011G148200.2 | 12.5364  | 36.8503  | -1.5556 | Down | 1.01E-18  | 4.30E-18  |
| Unigene2690  | Potri.008G216600.1 | 8.3207   | 24.4589  | -1.5556 | Down | 1.20E-50  | 1.19E-49  |
| Unigene18374 | Potri.002G162900.1 | 5.8827   | 17.2925  | -1.5556 | Down | 1.20E-50  | 1.19E-49  |
| Unigene1745  | Potri.009G031200.2 | 12.4112  | 36.4867  | -1.5557 | Down | 2.26E-41  | 1.83E-40  |
| Unigene9487  | Potri.008G042100.1 | 10.0948  | 29.6781  | -1.5558 | Down | 4.86E-14  | 1.70E-13  |
| Unigene34678 | Potri.001G112400.1 | 9.6294   | 28.3109  | -1.5558 | Down | 9.86E-37  | 7.15E-36  |
| Unigene60154 | Potri.018G146900.1 | 3.3094   | 9.7306   | -1.556  | Down | 1.09E-11  | 3.40E-11  |
| Unigene11765 | Potri.008G181200.2 | 5.7754   | 16.9815  | -1.556  | Down | 6.42E-22  | 3.04E-21  |
| Unigene1713  | Potri.018G013400.4 | 8.6512   | 25.4404  | -1.5561 | Down | 1.94E-27  | 1.09E-26  |
| Unigene41716 | Potri.005G179300.1 | 8.1294   | 23.905   | -1.5561 | Down | 1.38E-19  | 6.06E-19  |
| Unigene17979 | Potri.005G115500.1 | 8.2142   | 24.1556  | -1.5562 | Down | 2.85E-35  | 1.99E-34  |
| Unigene19636 | Potri.017G084100.1 | 6.419    | 18.8777  | -1.5563 | Down | 2.50E-09  | 6.87E-09  |
| Unigene17089 | Potri.014G117900.1 | 3.8876   | 11.433   | -1.5563 | Down | 2.50E-09  | 6.87E-09  |
| Unigene10785 | Potri.012G004400.1 | 7.2713   | 21.3841  | -1.5563 | Down | 9.04E-119 | 2.40E-117 |
| Unigene42793 | Potri.009G085400.8 | 9.8071   | 28.8432  | -1.5563 | Down | 9.06E-91  | 1.71E-89  |
| Unigene23136 | Potri.003G030800.1 | 4.1569   | 12.225   | -1.5563 | Down | 2.50E-09  | 6.87E-09  |
| Unigene43185 | Potri.001G320400.3 | 24.6844  | 72.5947  | -1.5563 | Down | 1.34E-87  | 2.43E-86  |
| Unigene93315 | Potri.005G172400.1 | 104.1057 | 306.1969 | -1.5564 | Down | 0         | 0         |
| Unigene73997 | Potri.009G023200.5 | 10.9807  | 32.2984  | -1.5565 | Down | 6.57E-15  | 2.38E-14  |
| Unigene5762  | Potri.003G172600.4 | 2.3522   | 6.9188   | -1.5565 | Down | 6.57E-15  | 2.38E-14  |
| Unigene10303 | Potri.014G169900.1 | 21.1872  | 62.3281  | -1.5567 | Down | 5.41E-37  | 3.95E-36  |
| Unigene6538  | Potri.018G051500.2 | 6.3662   | 18.7296  | -1.5568 | Down | 4.07E-18  | 1.69E-17  |
| Unigene24969 | Potri.017G047600.1 | 2.8523   | 8.3916   | -1.5568 | Down | 5.99E-07  | 1.40E-06  |
| Unigene27487 | Potri.016G114700.1 | 3.6734   | 10.8074  | -1.5568 | Down | 5.99E-07  | 1.40E-06  |
| Unigene68911 | Potri.014G197400.1 | 2.7629   | 8.1286   | -1.5568 | Down | 5.99E-07  | 1.40E-06  |
| Unigene30758 | Potri.011G092200.1 | 3.0836   | 9.072    | -1.5568 | Down | 1.46E-12  | 4.77E-12  |
| Unigene49428 | Potri.008G149900.2 | 12.9738  | 38.1692  | -1.5568 | Down | 1.20E-23  | 6.02E-23  |
| Unigene7982  | Potri.010G115200.1 | 20.0339  | 58.9435  | -1.5569 | Down | 7.83E-60  | 9.29E-59  |
| Unigene15484 | Potri.006G126300.3 | 42.6036  | 125.3483 | -1.5569 | Down | 2.42E-54  | 2.58E-53  |
| Unigene47494 | Potri.019G043300.1 | 17.503   | 51.4995  | -1.557  | Down | 2.38E-32  | 1.54E-31  |

|               |                    |          |          |         |      |           |           |
|---------------|--------------------|----------|----------|---------|------|-----------|-----------|
| Unigene70814  | Potri.018G113600.2 | 12.4332  | 36.5865  | -1.5571 | Down | 8.89E-16  | 3.35E-15  |
| Unigene82714  | Potri.001G193000.1 | 22.6917  | 66.7716  | -1.5571 | Down | 1.56E-35  | 1.10E-34  |
| Unigene22066  | Potri.004G055600.1 | 6.3589   | 18.7131  | -1.5572 | Down | 7.23E-79  | 1.17E-77  |
| Unigene24428  | Potri.014G166300.2 | 17.0226  | 50.0967  | -1.5573 | Down | 3.11E-59  | 3.64E-58  |
| Unigene46643  | Potri.014G107100.1 | 3.9012   | 11.4815  | -1.5573 | Down | 3.32E-10  | 9.58E-10  |
| Unigene8655   | Potri.008G152500.4 | 22.9392  | 67.5111  | -1.5573 | Down | 1.06E-27  | 6.03E-27  |
| Unigene42906  | Potri.004G131400.2 | 11.438   | 33.6613  | -1.5573 | Down | 3.11E-59  | 3.64E-58  |
| Unigene84872  | Potri.004G226300.2 | 108.7354 | 320.0617 | -1.5575 | Down | 5.86E-176 | 2.58E-174 |
| Unigene32979  | Potri.016G053700.1 | 7.4681   | 21.9832  | -1.5576 | Down | 1.96E-40  | 1.55E-39  |
| Unigene24555  | Potri.004G204300.1 | 20.3521  | 59.911   | -1.5576 | Down | 1.23E-58  | 1.43E-57  |
| Unigene27419  | Potri.006G138500.1 | 13.2184  | 38.9162  | -1.5578 | Down | 4.80E-23  | 2.36E-22  |
| Unigene18245  | Potri.014G178500.1 | 5.138    | 15.1276  | -1.5579 | Down | 2.00E-29  | 1.19E-28  |
| Unigene28972  | Potri.008G048900.2 | 5.6432   | 16.6154  | -1.5579 | Down | 1.31E-32  | 8.52E-32  |
| Unigene22926  | Potri.007G100800.1 | 7.5846   | 22.3313  | -1.5579 | Down | 1.31E-32  | 8.52E-32  |
| Unigene19051  | Potri.011G094100.4 | 8.9367   | 26.3142  | -1.558  | Down | 1.09E-51  | 1.11E-50  |
| Unigene101729 | Potri.018G127500.3 | 2.3707   | 6.9813   | -1.5582 | Down | 1.56E-04  | 2.93E-04  |
| Unigene94940  | Potri.017G124500.2 | 2.5316   | 7.4552   | -1.5582 | Down | 1.56E-04  | 2.93E-04  |
| Unigene52285  | Potri.014G157100.2 | 12.5572  | 36.9784  | -1.5582 | Down | 2.75E-30  | 1.68E-29  |
| Unigene28041  | Potri.012G004900.3 | 9.3717   | 27.5979  | -1.5582 | Down | 1.80E-33  | 1.20E-32  |
| Unigene17820  | Potri.011G019000.1 | 2.6985   | 7.9466   | -1.5582 | Down | 4.42E-11  | 1.34E-10  |
| Unigene4743   | Potri.010G083400.1 | 4.8371   | 14.2443  | -1.5582 | Down | 4.42E-11  | 1.34E-10  |
| Unigene14466  | Potri.010G060500.1 | 7.1914   | 21.1773  | -1.5582 | Down | 1.64E-17  | 6.63E-17  |
| Unigene16820  | Potri.006G021800.1 | 2.2202   | 6.5381   | -1.5582 | Down | 1.56E-04  | 2.93E-04  |
| Unigene93352  | Potri.005G099600.2 | 3.954    | 11.6438  | -1.5582 | Down | 2.65E-14  | 9.36E-14  |
| Unigene107712 | Potri.005G049000.1 | 24.9279  | 73.4076  | -1.5582 | Down | 2.75E-30  | 1.68E-29  |
| Unigene10373  | Potri.004G065600.1 | 1.6602   | 4.889    | -1.5582 | Down | 1.56E-04  | 2.93E-04  |
| Unigene49567  | Potri.001G431800.1 | 2.1113   | 6.2173   | -1.5582 | Down | 1.64E-17  | 6.63E-17  |
| Unigene13444  | Potri.013G059600.1 | 10.011   | 29.483   | -1.5583 | Down | 1.40E-56  | 1.56E-55  |
| Unigene46660  | Potri.010G190100.2 | 34.7804  | 102.4329 | -1.5583 | Down | 2.50E-92  | 4.82E-91  |
| Unigene11465  | Potri.015G089300.1 | 10.1291  | 29.8345  | -1.5585 | Down | 4.34E-51  | 4.33E-50  |
| Unigene14688  | Potri.014G181000.1 | 5.2409   | 15.4374  | -1.5585 | Down | 1.41E-21  | 6.60E-21  |
| Unigene40233  | Potri.005G003300.1 | 6.3883   | 18.816   | -1.5585 | Down | 5.81E-28  | 3.33E-27  |
| Unigene110101 | Potri.017G035800.3 | 13.3939  | 39.4546  | -1.5586 | Down | 2.22E-18  | 9.32E-18  |
| Unigene32888  | Potri.010G005400.2 | 6.3179   | 18.6106  | -1.5586 | Down | 2.16E-85  | 3.82E-84  |
| Unigene42877  | Potri.001G248200.1 | 6.8878   | 20.2898  | -1.5586 | Down | 1.67E-65  | 2.19E-64  |
| Unigene26604  | Potri.018G070200.2 | 17.2983  | 50.9595  | -1.5587 | Down | 7.98E-29  | 4.69E-28  |
| Unigene91315  | Potri.016G038200.1 | 28.7611  | 84.7278  | -1.5587 | Down | 1.56E-69  | 2.17E-68  |
| Unigene17927  | Potri.018G119700.1 | 5.934    | 17.4832  | -1.5589 | Down | 5.92E-12  | 1.88E-11  |
| Unigene7475   | Potri.014G094900.2 | 5.9631   | 17.5687  | -1.5589 | Down | 1.92E-22  | 9.25E-22  |

|               |                    |         |          |         |      |           |           |
|---------------|--------------------|---------|----------|---------|------|-----------|-----------|
| Unigene17934  | Potri.002G000200.3 | 3.006   | 8.8566   | -1.5589 | Down | 5.92E-12  | 1.88E-11  |
| Unigene42396  | Potri.001G274900.3 | 10.073  | 29.6787  | -1.5589 | Down | 1.71E-227 | 1.04E-225 |
| Unigene27529  | Potri.001G013800.5 | 4.8224  | 14.208   | -1.5589 | Down | 5.92E-12  | 1.88E-11  |
| Unigene44775  | Potri.005G224900.1 | 5.6442  | 16.6309  | -1.559  | Down | 6.47E-37  | 4.71E-36  |
| Unigene14276  | Potri.008G161400.1 | 32.8591 | 96.8272  | -1.5591 | Down | 5.89E-41  | 4.73E-40  |
| Unigene33016  | Potri.001G221000.1 | 8.6258  | 25.4181  | -1.5591 | Down | 3.58E-48  | 3.37E-47  |
| Unigene1559   | Potri.009G033400.2 | 10.5808 | 31.1807  | -1.5592 | Down | 3.30E-52  | 3.37E-51  |
| Unigene2364   | Potri.003G056400.1 | 16.6063 | 48.9357  | -1.5592 | Down | 8.54E-70  | 1.20E-68  |
| Unigene9171   | Potri.012G059000.1 | 15.5834 | 45.9259  | -1.5593 | Down | 1.36E-34  | 9.30E-34  |
| Unigene6324   | Potri.005G172400.1 | 29.8194 | 87.8847  | -1.5594 | Down | 2.62E-64  | 3.37E-63  |
| Unigene9466   | Potri.001G140800.1 | 14.8176 | 43.6716  | -1.5594 | Down | 4.13E-20  | 1.84E-19  |
| Unigene30913  | Potri.T130900.1    | 2.2516  | 6.6365   | -1.5595 | Down | 7.95E-13  | 2.63E-12  |
| Unigene67462  | Potri.018G115200.1 | 7.3218  | 21.5809  | -1.5595 | Down | 7.95E-13  | 2.63E-12  |
| Unigene82068  | Potri.011G013700.3 | 7.6327  | 22.4975  | -1.5595 | Down | 7.95E-13  | 2.63E-12  |
| Unigene32570  | Potri.006G276600.2 | 11.5727 | 34.1111  | -1.5595 | Down | 1.86E-84  | 3.25E-83  |
| Unigene73862  | Potri.006G024600.1 | 9.2811  | 27.3561  | -1.5595 | Down | 7.95E-13  | 2.63E-12  |
| Unigene24313  | Potri.015G030400.1 | 30.9106 | 91.1214  | -1.5597 | Down | 1.78E-109 | 4.28E-108 |
| Unigene4121   | Potri.013G027900.1 | 25.5877 | 75.433   | -1.5597 | Down | 2.14E-44  | 1.85E-43  |
| Unigene43259  | Potri.014G149600.1 | 24.2491 | 71.4879  | -1.5598 | Down | 2.21E-118 | 5.85E-117 |
| Unigene423    | Potri.011G071400.1 | 6.8627  | 20.2318  | -1.5598 | Down | 1.81E-52  | 1.86E-51  |
| Unigene43157  | Potri.019G019200.1 | 5.2269  | 15.411   | -1.5599 | Down | 1.73E-73  | 2.58E-72  |
| Unigene12530  | Potri.014G045100.1 | 13.3913 | 39.4814  | -1.5599 | Down | 2.96E-45  | 2.61E-44  |
| Unigene5976   | Potri.017G123700.1 | 2.7153  | 8.0062   | -1.56   | Down | 1.96E-05  | 4.02E-05  |
| Unigene61314  | Potri.008G079300.4 | 7.1827  | 21.1787  | -1.56   | Down | 1.07E-13  | 3.68E-13  |
| Unigene29605  | Potri.007G092200.1 | 17.749  | 52.3342  | -1.56   | Down | 3.21E-58  | 3.69E-57  |
| Unigene105727 | Potri.006G199100.1 | 4.7404  | 13.9775  | -1.56   | Down | 1.36E-09  | 3.78E-09  |
| Unigene28203  | Potri.005G084600.1 | 2.6946  | 7.9454   | -1.56   | Down | 1.96E-05  | 4.02E-05  |
| Unigene6940   | Potri.005G072600.2 | 1.7629  | 5.1981   | -1.56   | Down | 1.96E-05  | 4.02E-05  |
| Unigene79118  | Potri.002G187300.1 | 5.9058  | 17.4136  | -1.56   | Down | 1.36E-09  | 3.78E-09  |
| Unigene53813  | Potri.002G086000.2 | 7.04    | 20.7579  | -1.56   | Down | 1.07E-13  | 3.68E-13  |
| Unigene42224  | Potri.001G435100.1 | 2.1541  | 6.3515   | -1.56   | Down | 1.96E-05  | 4.02E-05  |
| Unigene12022  | Potri.001G259100.4 | 2.5818  | 7.6125   | -1.56   | Down | 1.36E-09  | 3.78E-09  |
| Unigene28666  | Potri.014G075200.1 | 8.1366  | 23.9983  | -1.5604 | Down | 1.17E-44  | 1.02E-43  |
| Unigene714    | Potri.008G186900.2 | 7.3485  | 21.6737  | -1.5604 | Down | 1.32E-74  | 2.00E-73  |
| Unigene6864   | Potri.002G192400.3 | 5.1052  | 15.0566  | -1.5604 | Down | 1.02E-35  | 7.24E-35  |
| Unigene86307  | Potri.015G090900.3 | 7.5842  | 22.3698  | -1.5605 | Down | 1.44E-14  | 5.17E-14  |
| Unigene37110  | Potri.002G169800.1 | 5.6319  | 16.6112  | -1.5605 | Down | 1.44E-14  | 5.17E-14  |
| Unigene51783  | Potri.006G126300.3 | 44.4145 | 131.0084 | -1.5606 | Down | 5.97E-133 | 1.83E-131 |
| Unigene26408  | Potri.005G185400.5 | 51.9268 | 153.1765 | -1.5606 | Down | 3.53E-77  | 5.55E-76  |



|               |                    |         |          |         |      |           |           |
|---------------|--------------------|---------|----------|---------|------|-----------|-----------|
| Unigene34694  | Potri.010G160200.7 | 2.1849  | 6.4453   | -1.5607 | Down | 1.80E-10  | 5.28E-10  |
| Unigene4969   | Potri.005G158400.1 | 29.3367 | 86.5412  | -1.5607 | Down | 2.24E-46  | 2.03E-45  |
| Unigene64656  | Potri.001G394000.3 | 3.5363  | 10.4318  | -1.5607 | Down | 1.80E-10  | 5.28E-10  |
| Unigene94004  | Potri.001G025600.1 | 4.4067  | 12.9994  | -1.5607 | Down | 1.65E-19  | 7.24E-19  |
| Unigene13169  | Potri.015G079800.1 | 7.9188  | 23.3616  | -1.5608 | Down | 1.97E-24  | 1.01E-23  |
| Unigene35011  | Potri.009G058400.2 | 2.5258  | 7.4517   | -1.5608 | Down | 2.68E-38  | 2.02E-37  |
| Unigene72752  | Potri.017G088300.1 | 27.4367 | 80.95    | -1.5609 | Down | 2.96E-34  | 2.01E-33  |
| Unigene2716   | Potri.013G012500.2 | 8.6228  | 25.4407  | -1.5609 | Down | 4.28E-48  | 4.02E-47  |
| Unigene3150   | Potri.009G145200.2 | 4.6804  | 13.8088  | -1.5609 | Down | 1.95E-15  | 7.25E-15  |
| Unigene40449  | Potri.012G127100.1 | 9.8569  | 29.083   | -1.561  | Down | 2.26E-20  | 1.02E-19  |
| Unigene45396  | Potri.005G099900.1 | 16.0294 | 47.2962  | -1.561  | Down | 5.14E-157 | 1.96E-155 |
| Unigene44351  | Potri.018G090400.2 | 18.6156 | 54.9321  | -1.5611 | Down | 1.34E-59  | 1.58E-58  |
| Unigene19102  | Potri.002G019400.2 | 21.2466 | 62.694   | -1.5611 | Down | 5.10E-40  | 4.00E-39  |
| Unigene52932  | Potri.001G410100.4 | 13.5451 | 39.9674  | -1.5611 | Down | 3.29E-30  | 2.01E-29  |
| Unigene76524  | Potri.001G322300.1 | 33.5036 | 98.8627  | -1.5611 | Down | 6.44E-45  | 5.64E-44  |
| Unigene10560  | Potri.015G147200.1 | 15.2514 | 45.0074  | -1.5612 | Down | 3.08E-21  | 1.43E-20  |
| Unigene5609   | Potri.012G018200.9 | 2.4395  | 7.1991   | -1.5612 | Down | 2.65E-16  | 1.02E-15  |
| Unigene20001  | Potri.011G053800.1 | 1.9322  | 5.702    | -1.5612 | Down | 2.50E-06  | 5.56E-06  |
| Unigene42049  | Potri.003G130400.1 | 3.0971  | 9.1396   | -1.5612 | Down | 2.50E-06  | 5.56E-06  |
| Unigene22869  | Potri.002G133300.1 | 1.9813  | 5.8468   | -1.5612 | Down | 2.50E-06  | 5.56E-06  |
| Unigene21894  | Potri.015G017500.1 | 12.7644 | 37.6736  | -1.5614 | Down | 8.21E-73  | 1.20E-71  |
| Unigene1943   | Potri.014G052600.1 | 37.5964 | 110.9623 | -1.5614 | Down | 1.38E-82  | 2.34E-81  |
| Unigene118749 | Potri.006G000500.3 | 14.8579 | 43.8536  | -1.5615 | Down | 1.34E-42  | 1.12E-41  |
| Unigene49874  | Potri.001G471000.4 | 7.7631  | 22.9135  | -1.5615 | Down | 1.07E-37  | 7.92E-37  |
| Unigene9954   | Potri.001G349300.1 | 13.1163 | 38.7132  | -1.5615 | Down | 4.21E-22  | 2.00E-21  |
| Unigene8934   | Potri.001G077900.1 | 22.2818 | 65.7736  | -1.5616 | Down | 7.35E-60  | 8.72E-59  |
| Unigene34272  | Potri.011G040100.2 | 4.924   | 14.5356  | -1.5617 | Down | 2.56E-44  | 2.21E-43  |
| Unigene16299  | Potri.010G060500.1 | 19.7075 | 58.1786  | -1.5617 | Down | 2.03E-39  | 1.57E-38  |
| Unigene49694  | Potri.012G000900.3 | 10.5034 | 31.0077  | -1.5618 | Down | 9.55E-29  | 5.60E-28  |
| Unigene32245  | Potri.009G064600.3 | 12.6584 | 37.3691  | -1.5618 | Down | 1.79E-93  | 3.50E-92  |
| Unigene11774  | Potri.009G040900.1 | 4.9358  | 14.573   | -1.5619 | Down | 2.24E-35  | 1.56E-34  |
| Unigene6648   | Potri.002G198500.1 | 25.0538 | 73.9758  | -1.562  | Down | 3.91E-87  | 7.06E-86  |
| Unigene86216  | Potri.016G036500.1 | 3.3682  | 9.9455   | -1.5621 | Down | 3.23E-07  | 7.70E-07  |
| Unigene40157  | Potri.005G093300.1 | 2.499   | 7.3789   | -1.5621 | Down | 3.23E-07  | 7.70E-07  |
| Unigene36181  | Potri.003G196900.2 | 4.4171  | 13.0426  | -1.5621 | Down | 3.23E-07  | 7.70E-07  |
| Unigene16039  | Potri.001G140200.3 | 4.8418  | 14.2967  | -1.5621 | Down | 3.23E-07  | 7.70E-07  |
| Unigene39783  | Potri.014G161100.1 | 7.1407  | 21.0882  | -1.5623 | Down | 9.04E-20  | 3.99E-19  |
| Unigene23796  | Potri.010G089500.2 | 4.1943  | 12.3864  | -1.5623 | Down | 1.48E-25  | 7.85E-25  |
| Unigene89876  | Potri.016G100400.3 | 26.3231 | 77.7425  | -1.5624 | Down | 6.03E-57  | 6.77E-56  |

|               |                    |         |          |         |      |           |           |
|---------------|--------------------|---------|----------|---------|------|-----------|-----------|
| Unigene21813  | Potri.005G047900.1 | 5.8872  | 17.387   | -1.5624 | Down | 3.41E-32  | 2.20E-31  |
| Unigene8595   | Potri.002G024200.1 | 3.7954  | 11.2096  | -1.5624 | Down | 5.83E-14  | 2.03E-13  |
| Unigene34748  | Potri.007G000700.1 | 4.7419  | 14.0062  | -1.5625 | Down | 2.68E-46  | 2.42E-45  |
| Unigene24008  | Potri.002G231100.2 | 8.2103  | 24.2517  | -1.5626 | Down | 6.46E-34  | 4.36E-33  |
| Unigene17382  | Potri.014G157800.1 | 2.0834  | 6.1545   | -1.5627 | Down | 4.22E-08  | 1.07E-07  |
| Unigene28821  | Potri.003G034400.1 | 2.793   | 8.2506   | -1.5627 | Down | 7.87E-15  | 2.85E-14  |
| Unigene95909  | Potri.002G188300.1 | 4.9414  | 14.5972  | -1.5627 | Down | 4.22E-08  | 1.07E-07  |
| Unigene13386  | Potri.018G004400.1 | 5.1142  | 15.1092  | -1.5628 | Down | 9.78E-50  | 9.49E-49  |
| Unigene6628   | Potri.005G075700.3 | 7.8483  | 23.1871  | -1.5629 | Down | 2.30E-22  | 1.10E-21  |
| Unigene11120  | Potri.002G001700.1 | 6.8247  | 20.1644  | -1.563  | Down | 9.22E-122 | 2.53E-120 |
| Unigene7561   | Potri.001G376400.5 | 5.3436  | 15.7891  | -1.563  | Down | 3.15E-23  | 1.56E-22  |
| Unigene25773  | Potri.001G164000.1 | 30.9902 | 91.5663  | -1.563  | Down | 2.33E-37  | 1.71E-36  |
| Unigene7598   | Potri.001G028400.1 | 4.4118  | 13.035   | -1.563  | Down | 1.07E-15  | 4.00E-15  |
| Unigene50126  | Potri.001G114400.2 | 9.8132  | 28.997   | -1.5631 | Down | 1.06E-45  | 9.48E-45  |
| Unigene12153  | Potri.008G086300.4 | 3.4813  | 10.2874  | -1.5632 | Down | 5.55E-09  | 1.49E-08  |
| Unigene19014  | Potri.006G168700.1 | 1.6998  | 5.0232   | -1.5632 | Down | 5.55E-09  | 1.49E-08  |
| Unigene57502  | Potri.003G161400.1 | 5.264   | 15.5556  | -1.5632 | Down | 5.55E-09  | 1.49E-08  |
| Unigene34577  | Potri.011G111900.1 | 26.6558 | 78.775   | -1.5633 | Down | 3.23E-63  | 4.07E-62  |
| Unigene44482  | Potri.008G196500.1 | 16.4241 | 48.5365  | -1.5633 | Down | 2.03E-47  | 1.88E-46  |
| Unigene31961  | Potri.008G117000.1 | 8.4088  | 24.8508  | -1.5633 | Down | 8.95E-95  | 1.79E-93  |
| Unigene31825  | Potri.006G106500.1 | 15.7924 | 46.6741  | -1.5634 | Down | 8.85E-144 | 2.98E-142 |
| Unigene53303  | Potri.001G279300.1 | 8.8751  | 26.2302  | -1.5634 | Down | 1.96E-17  | 7.92E-17  |
| Unigene3650   | Potri.014G135900.1 | 37.2995 | 110.2487 | -1.5635 | Down | 7.90E-76  | 1.22E-74  |
| Unigene27679  | Potri.007G003400.1 | 10.2054 | 30.1632  | -1.5635 | Down | 8.08E-26  | 4.33E-25  |
| Unigene1250   | Potri.016G090800.1 | 2.9157  | 8.6193   | -1.5637 | Down | 3.63E-19  | 1.57E-18  |
| Unigene51227  | Potri.009G148900.2 | 22.4599 | 66.3992  | -1.5638 | Down | 1.28E-37  | 9.46E-37  |
| Unigene74517  | Potri.017G043100.1 | 44.5522 | 131.7182 | -1.5639 | Down | 7.20E-57  | 8.09E-56  |
| Unigene91775  | Potri.004G017200.1 | 33.2971 | 98.4446  | -1.5639 | Down | 2.90E-85  | 5.11E-84  |
| Unigene954    | Potri.001G266400.1 | 6.7157  | 19.8554  | -1.5639 | Down | 6.54E-67  | 8.77E-66  |
| Unigene533    | Potri.T075900.2    | 6.1169  | 18.0858  | -1.564  | Down | 3.94E-30  | 2.40E-29  |
| Unigene20290  | Potri.013G147100.1 | 4.7126  | 13.9352  | -1.5641 | Down | 1.31E-11  | 4.07E-11  |
| Unigene15181  | Potri.003G117400.1 | 17.2636 | 51.0461  | -1.5641 | Down | 5.41E-31  | 3.38E-30  |
| Unigene29075  | Potri.003G012300.1 | 3.0876  | 9.1297   | -1.5641 | Down | 5.41E-31  | 3.38E-30  |
| Unigene119251 | Potri.008G070700.2 | 2.7137  | 8.0246   | -1.5642 | Down | 1.31E-11  | 4.07E-11  |
| Unigene76357  | Potri.014G141700.1 | 8.4546  | 25.0041  | -1.5644 | Down | 1.75E-12  | 5.70E-12  |
| Unigene8649   | Potri.010G246400.3 | 5.0192  | 14.8441  | -1.5644 | Down | 1.75E-12  | 5.70E-12  |
| Unigene18625  | Potri.004G122400.1 | 3.6866  | 10.903   | -1.5644 | Down | 1.75E-12  | 5.70E-12  |
| Unigene48847  | Potri.018G141000.1 | 5.1805  | 15.3231  | -1.5645 | Down | 2.36E-13  | 7.99E-13  |
| Unigene37552  | Potri.003G085500.1 | 81.9933 | 242.5275 | -1.5646 | Down | 2.05E-108 | 4.86E-107 |

|               |                    |         |          |         |      |           |           |
|---------------|--------------------|---------|----------|---------|------|-----------|-----------|
| Unigene39331  | Potri.017G093200.1 | 2.6786  | 7.9236   | -1.5647 | Down | 9.65E-39  | 7.34E-38  |
| Unigene32432  | Potri.005G091400.2 | 30.632  | 90.6249  | -1.5649 | Down | 2.72E-137 | 8.71E-136 |
| Unigene44402  | Potri.T059600.3    | 10.3777 | 30.706   | -1.565  | Down | 2.97E-31  | 1.87E-30  |
| Unigene84693  | Potri.018G129900.2 | 18.3179 | 54.2     | -1.565  | Down | 2.97E-31  | 1.87E-30  |
| Unigene71578  | Potri.014G067300.6 | 12.3107 | 36.424   | -1.565  | Down | 5.81E-16  | 2.21E-15  |
| Unigene19312  | Potri.008G062900.1 | 9.9559  | 29.4591  | -1.5651 | Down | 7.88E-17  | 3.11E-16  |
| Unigene49810  | Potri.014G022800.1 | 5.6648  | 16.7637  | -1.5652 | Down | 1.06E-34  | 7.31E-34  |
| Unigene47338  | Potri.008G206400.3 | 9.6464  | 28.5454  | -1.5652 | Down | 1.07E-17  | 4.37E-17  |
| Unigene50428  | Potri.008G144200.1 | 13.1746 | 38.987   | -1.5652 | Down | 1.06E-34  | 7.31E-34  |
| Unigene33030  | Potri.008G075700.2 | 47.8553 | 141.6127 | -1.5652 | Down | 6.44E-276 | 5.08E-274 |
| Unigene43036  | Potri.006G063700.1 | 8.3858  | 24.8143  | -1.5652 | Down | 4.64E-49  | 4.44E-48  |
| Unigene53731  | Potri.005G229100.1 | 10.8429 | 32.0859  | -1.5652 | Down | 1.07E-17  | 4.37E-17  |
| Unigene3646   | Potri.001G049400.3 | 7.0663  | 20.9117  | -1.5653 | Down | 1.46E-18  | 6.14E-18  |
| Unigene307    | Potri.013G091700.1 | 3.943   | 11.6698  | -1.5654 | Down | 2.70E-20  | 1.21E-19  |
| Unigene53137  | Potri.016G018300.1 | 14.7576 | 43.6796  | -1.5655 | Down | 3.69E-21  | 1.71E-20  |
| Unigene40399  | Potri.010G001400.3 | 43.2482 | 128.0037 | -1.5655 | Down | 2.28E-59  | 2.69E-58  |
| Unigene111766 | Potri.006G153800.2 | 14.3825 | 42.5691  | -1.5655 | Down | 3.69E-21  | 1.71E-20  |
| Unigene2973   | Potri.011G131700.2 | 4.6807  | 13.8546  | -1.5656 | Down | 1.16E-63  | 1.48E-62  |
| Unigene2580   | Potri.001G369400.1 | 36.2882 | 107.4169 | -1.5656 | Down | 2.47E-132 | 7.54E-131 |
| Unigene39857  | Potri.019G051200.1 | 7.9031  | 23.395   | -1.5657 | Down | 1.29E-24  | 6.66E-24  |
| Unigene13281  | Potri.005G138100.1 | 19.8034 | 58.6207  | -1.5657 | Down | 5.95E-68  | 8.10E-67  |
| Unigene22727  | Potri.005G005300.1 | 4.5534  | 13.4791  | -1.5657 | Down | 1.33E-47  | 1.24E-46  |
| Unigene41935  | Potri.002G006200.3 | 23.1437 | 68.5085  | -1.5657 | Down | 6.97E-46  | 6.24E-45  |
| Unigene16748  | Potri.008G192200.2 | 12.9383 | 38.3015  | -1.5658 | Down | 1.77E-25  | 9.37E-25  |
| Unigene40099  | Potri.008G161200.2 | 8.1985  | 24.2703  | -1.5658 | Down | 1.77E-25  | 9.37E-25  |
| Unigene36592  | Potri.018G048700.1 | 13.4541 | 39.8317  | -1.5659 | Down | 4.56E-28  | 2.62E-27  |
| Unigene39954  | Potri.006G135500.1 | 17.207  | 50.9512  | -1.5661 | Down | 8.70E-71  | 1.24E-69  |
| Unigene24275  | Potri.018G108300.1 | 9.5721  | 28.3447  | -1.5662 | Down | 1.09E-111 | 2.69E-110 |
| Unigene54148  | Potri.002G016900.1 | 49.4682 | 146.4907 | -1.5662 | Down | 6.12E-82  | 1.03E-80  |
| Unigene76691  | Potri.003G023300.1 | 34.6705 | 102.6759 | -1.5663 | Down | 5.29E-47  | 4.85E-46  |
| Unigene45397  | Potri.005G049100.2 | 6.2621  | 18.547   | -1.5665 | Down | 9.53E-61  | 1.15E-59  |
| Unigene45719  | Potri.001G350300.1 | 10.2534 | 30.3698  | -1.5665 | Down | 4.78E-71  | 6.82E-70  |
| Unigene12647  | Potri.013G118900.1 | 20.6515 | 61.172   | -1.5666 | Down | 1.72E-92  | 3.32E-91  |
| Unigene53433  | Potri.T034200.1    | 2.5288  | 7.4922   | -1.5669 | Down | 1.74E-07  | 4.24E-07  |
| Unigene23695  | Potri.018G106100.1 | 15.8044 | 46.8245  | -1.5669 | Down | 9.38E-117 | 2.44E-115 |
| Unigene39285  | Potri.018G074100.1 | 7.1411  | 21.1573  | -1.5669 | Down | 9.66E-26  | 5.17E-25  |
| Unigene111829 | Potri.016G100500.1 | 10.7473 | 31.8417  | -1.5669 | Down | 3.17E-16  | 1.22E-15  |
| Unigene39711  | Potri.015G043100.1 | 4.0324  | 11.947   | -1.5669 | Down | 1.48E-20  | 6.69E-20  |
| Unigene9652   | Potri.014G189900.1 | 4.2628  | 12.6296  | -1.5669 | Down | 3.01E-09  | 8.20E-09  |

|               |                     |         |         |         |      |          |          |
|---------------|---------------------|---------|---------|---------|------|----------|----------|
| Unigene52585  | Potri.014G097800.2  | 5.6301  | 16.6807 | -1.5669 | Down | 3.99E-10 | 1.15E-09 |
| Unigene82881  | Potri.014G052600.1  | 5.6301  | 16.6807 | -1.5669 | Down | 3.99E-10 | 1.15E-09 |
| Unigene90259  | Potri.014G009900.1  | 1.9788  | 5.8626  | -1.5669 | Down | 1.05E-05 | 2.21E-05 |
| Unigene104876 | Potri.012G143800.1  | 3.1213  | 9.2476  | -1.5669 | Down | 1.05E-05 | 2.21E-05 |
| Unigene40013  | Potri.012G118200.1  | 2.1382  | 6.3349  | -1.5669 | Down | 3.01E-09 | 8.20E-09 |
| Unigene109221 | Potri.012G046900.1  | 4.2028  | 12.4518 | -1.5669 | Down | 1.34E-06 | 3.05E-06 |
| Unigene4903   | Potri.011G104200.1  | 5.2866  | 15.6627 | -1.5669 | Down | 3.01E-09 | 8.20E-09 |
| Unigene16048  | Potri.011G078900.1  | 8.4546  | 25.0488 | -1.5669 | Down | 3.17E-16 | 1.22E-15 |
| Unigene38924  | Potri.010G161500.4  | 3.5618  | 10.5526 | -1.5669 | Down | 3.01E-09 | 8.20E-09 |
| Unigene36645  | Potri.010G089600.3  | 7.8042  | 23.1219 | -1.5669 | Down | 3.17E-16 | 1.22E-15 |
| Unigene39394  | Potri.010G044700.2  | 17.2899 | 51.2257 | -1.5669 | Down | 3.59E-78 | 5.73E-77 |
| Unigene111871 | Potri.009G125500.1  | 8.1839  | 24.2468 | -1.5669 | Down | 9.54E-13 | 3.14E-12 |
| Unigene46870  | Potri.008G163300.2  | 4.852   | 14.3752 | -1.5669 | Down | 7.11E-12 | 2.24E-11 |
| Unigene26012  | Potri.008G031200.1  | 7.3748  | 21.8498 | -1.5669 | Down | 9.54E-13 | 3.14E-12 |
| Unigene30563  | Potri.008G024700.1  | 7.1982  | 21.3264 | -1.5669 | Down | 5.31E-11 | 1.60E-10 |
| Unigene52655  | Potri.006G145000.1  | 5.5879  | 16.5557 | -1.5669 | Down | 3.99E-10 | 1.15E-09 |
| Unigene40342  | Potri.006G067600.1  | 9.3807  | 27.7928 | -1.5669 | Down | 1.08E-19 | 4.77E-19 |
| Unigene12132  | Potri.005G215200.1  | 5.9043  | 17.4931 | -1.5669 | Down | 5.15E-24 | 2.61E-23 |
| Unigene7635   | Potri.005G111100.1  | 1.7612  | 5.218   | -1.5669 | Down | 1.74E-07 | 4.24E-07 |
| Unigene34112  | Potri.005G082000.4  | 3.5453  | 10.5039 | -1.5669 | Down | 7.11E-12 | 2.24E-11 |
| Unigene16879  | Potri.005G053700.1  | 1.5848  | 4.6954  | -1.5669 | Down | 1.74E-07 | 4.24E-07 |
| Unigene1316   | Potri.004G207000.1  | 8.7409  | 25.8971 | -1.5669 | Down | 1.33E-26 | 7.28E-26 |
| Unigene37138  | Potri.004G156000.2  | 6.2455  | 18.5039 | -1.5669 | Down | 3.01E-09 | 8.20E-09 |
| Unigene118139 | Potri.003G197600.1  | 1.4556  | 4.3126  | -1.5669 | Down | 8.31E-05 | 1.61E-04 |
| Unigene24450  | Potri.002G243400.10 | 4.0015  | 11.8554 | -1.5669 | Down | 1.08E-19 | 4.77E-19 |
| Unigene6088   | Potri.002G085000.5  | 4.7786  | 14.1578 | -1.5669 | Down | 3.01E-09 | 8.20E-09 |
| Unigene91589  | Potri.001G453500.1  | 1.3944  | 4.1312  | -1.5669 | Down | 8.31E-05 | 1.61E-04 |
| Unigene18756  | Potri.001G452700.1  | 5.4537  | 16.158  | -1.5669 | Down | 1.28E-13 | 4.40E-13 |
| Unigene119557 | Potri.001G362100.1  | 1.5214  | 4.5075  | -1.5669 | Down | 1.73E-14 | 6.17E-14 |
| Unigene102270 | Potri.001G341300.3  | 7.351   | 21.7792 | -1.5669 | Down | 7.05E-25 | 3.68E-24 |
| Unigene21423  | Potri.001G144700.1  | 2.253   | 6.6751  | -1.5669 | Down | 7.05E-25 | 3.68E-24 |
| Unigene51188  | Potri.001G096100.1  | 1.9558  | 5.7945  | -1.5669 | Down | 1.74E-07 | 4.24E-07 |
| Unigene53470  | Potri.001G045500.1  | 3.3303  | 9.8669  | -1.5669 | Down | 1.05E-05 | 2.21E-05 |
| Unigene20270  | Potri.001G006700.1  | 1.0379  | 3.075   | -1.5669 | Down | 8.31E-05 | 1.61E-04 |
| Unigene51723  | Potri.018G034400.2  | 1.9631  | 5.8163  | -1.567  | Down | 8.31E-05 | 1.61E-04 |
| Unigene94924  | Potri.018G014500.1  | 1.635   | 4.8442  | -1.567  | Down | 8.31E-05 | 1.61E-04 |
| Unigene53462  | Potri.015G146700.1  | 2.7835  | 8.247   | -1.567  | Down | 1.05E-05 | 2.21E-05 |
| Unigene63687  | Potri.015G111600.1  | 1.2105  | 3.5865  | -1.567  | Down | 8.31E-05 | 1.61E-04 |
| Unigene8587   | Potri.007G042100.6  | 3.0065  | 8.9076  | -1.567  | Down | 2.28E-08 | 5.90E-08 |

|              |                    |         |          |         |      |           |           |
|--------------|--------------------|---------|----------|---------|------|-----------|-----------|
| Unigene25695 | Potri.006G280800.1 | 1.8954  | 5.6157   | -1.567  | Down | 1.74E-07  | 4.24E-07  |
| Unigene11113 | Potri.002G009400.1 | 9.2102  | 27.2979  | -1.5675 | Down | 1.54E-53  | 1.62E-52  |
| Unigene6759  | Potri.009G068300.1 | 6.9421  | 20.5777  | -1.5676 | Down | 1.66E-41  | 1.35E-40  |
| Unigene6677  | Potri.010G148600.1 | 12.1346 | 35.9737  | -1.5678 | Down | 9.23E-34  | 6.20E-33  |
| Unigene6221  | Potri.006G035900.2 | 9.3748  | 27.793   | -1.5679 | Down | 4.88E-32  | 3.13E-31  |
| Unigene40512 | Potri.001G369000.2 | 26.1654 | 77.5714  | -1.5679 | Down | 4.88E-32  | 3.13E-31  |
| Unigene13824 | Potri.001G087300.4 | 19.8252 | 58.7764  | -1.5679 | Down | 1.99E-177 | 8.86E-176 |
| Unigene14403 | Potri.009G114900.1 | 4.6818  | 13.8814  | -1.568  | Down | 9.95E-28  | 5.66E-27  |
| Unigene3028  | Potri.015G148300.1 | 14.2905 | 42.3746  | -1.5681 | Down | 1.21E-48  | 1.15E-47  |
| Unigene44891 | Potri.010G184300.1 | 3.0609  | 9.076    | -1.5681 | Down | 5.29E-26  | 2.85E-25  |
| Unigene50867 | Potri.010G157700.2 | 8.3443  | 24.7412  | -1.5681 | Down | 7.25E-27  | 4.02E-26  |
| Unigene53880 | Potri.006G039600.1 | 9.8362  | 29.1684  | -1.5682 | Down | 2.06E-23  | 1.02E-22  |
| Unigene43595 | Potri.004G204500.1 | 4.8144  | 14.2763  | -1.5682 | Down | 4.57E-46  | 4.11E-45  |
| Unigene3165  | Potri.002G091900.1 | 9.974   | 29.576   | -1.5682 | Down | 1.63E-69  | 2.27E-68  |
| Unigene1246  | Potri.014G081400.1 | 2.4072  | 7.1387   | -1.5683 | Down | 1.51E-22  | 7.28E-22  |
| Unigene19933 | Potri.014G062800.1 | 15.3222 | 45.4376  | -1.5683 | Down | 2.40E-44  | 2.07E-43  |
| Unigene31419 | Potri.010G149500.2 | 9.3753  | 27.8038  | -1.5683 | Down | 1.10E-21  | 5.19E-21  |
| Unigene39567 | Potri.003G166000.1 | 8.3104  | 24.6441  | -1.5683 | Down | 4.42E-66  | 5.85E-65  |
| Unigene991   | Potri.019G133000.1 | 10.7754 | 31.9568  | -1.5684 | Down | 4.53E-80  | 7.45E-79  |
| Unigene46308 | Potri.015G105300.4 | 27.4352 | 81.3667  | -1.5684 | Down | 3.26E-59  | 3.82E-58  |
| Unigene34713 | Potri.001G472000.1 | 11.1398 | 33.0382  | -1.5684 | Down | 4.78E-40  | 3.75E-39  |
| Unigene83886 | Potri.019G055300.1 | 23.1421 | 68.6375  | -1.5685 | Down | 2.51E-38  | 1.89E-37  |
| Unigene41644 | Potri.010G199100.2 | 9.561   | 28.3585  | -1.5685 | Down | 4.34E-19  | 1.87E-18  |
| Unigene22752 | Potri.009G050100.3 | 21.3931 | 63.4503  | -1.5685 | Down | 3.40E-93  | 6.65E-92  |
| Unigene26291 | Potri.005G114300.1 | 27.9336 | 82.8488  | -1.5685 | Down | 2.51E-38  | 1.89E-37  |
| Unigene76073 | Potri.003G071700.5 | 41.1294 | 121.9908 | -1.5685 | Down | 6.41E-55  | 6.91E-54  |
| Unigene10212 | Potri.012G054900.1 | 6.3053  | 18.7031  | -1.5686 | Down | 6.97E-35  | 4.81E-34  |
| Unigene79682 | Potri.009G157400.4 | 12.4332 | 36.8778  | -1.5686 | Down | 4.34E-19  | 1.87E-18  |
| Unigene37725 | Potri.015G106000.3 | 7.9849  | 23.6869  | -1.5687 | Down | 2.35E-17  | 9.45E-17  |
| Unigene3011  | Potri.014G036800.4 | 5.6184  | 16.6661  | -1.5687 | Down | 1.27E-50  | 1.25E-49  |
| Unigene18893 | Potri.014G017900.1 | 8.4039  | 24.9297  | -1.5687 | Down | 3.68E-33  | 2.43E-32  |
| Unigene32975 | Potri.001G216600.1 | 33.5992 | 99.6657  | -1.5687 | Down | 1.27E-50  | 1.25E-49  |
| Unigene21824 | Potri.003G090000.2 | 16.6148 | 49.2901  | -1.5688 | Down | 4.67E-151 | 1.69E-149 |
| Unigene88070 | Potri.004G092900.4 | 76.2009 | 226.0726 | -1.5689 | Down | 4.64E-145 | 1.59E-143 |
| Unigene42839 | Potri.002G078800.1 | 6.0094  | 17.8282  | -1.5689 | Down | 1.81E-45  | 1.61E-44  |
| Unigene25021 | Potri.016G110700.1 | 5.4826  | 16.2677  | -1.5691 | Down | 9.44E-15  | 3.40E-14  |
| Unigene41336 | Potri.006G015300.1 | 8.4269  | 25.0041  | -1.5691 | Down | 9.44E-15  | 3.40E-14  |
| Unigene18499 | Potri.008G211200.1 | 7.173   | 21.2849  | -1.5692 | Down | 1.90E-39  | 1.47E-38  |
| Unigene51672 | Potri.005G092800.1 | 7.1345  | 21.1714  | -1.5692 | Down | 6.99E-14  | 2.43E-13  |

|               |                     |         |          |         |      |           |           |
|---------------|---------------------|---------|----------|---------|------|-----------|-----------|
| Unigene11048  | Potri.010G221600.6  | 22.0451 | 65.4202  | -1.5693 | Down | 5.02E-50  | 4.91E-49  |
| Unigene119294 | Potri.009G073800.1  | 3.1827  | 9.4447   | -1.5693 | Down | 6.99E-14  | 2.43E-13  |
| Unigene8975   | Potri.009G059600.1  | 25.8415 | 76.6933  | -1.5694 | Down | 1.90E-47  | 1.76E-46  |
| Unigene33781  | Potri.008G036300.3  | 13.1645 | 39.0728  | -1.5695 | Down | 9.95E-46  | 8.88E-45  |
| Unigene47962  | Potri.007G090400.1  | 25.8813 | 76.8166  | -1.5695 | Down | 9.95E-46  | 8.88E-45  |
| Unigene43450  | Potri.015G063100.1  | 20.0688 | 59.568   | -1.5696 | Down | 4.09E-87  | 7.37E-86  |
| Unigene23874  | Potri.012G056000.1  | 5.9869  | 17.7724  | -1.5698 | Down | 1.06E-31  | 6.77E-31  |
| Unigene119531 | Potri.010G026200.2  | 1.5456  | 4.5884   | -1.5698 | Down | 2.89E-11  | 8.84E-11  |
| Unigene1596   | Potri.005G079900.4  | 6.5878  | 19.5565  | -1.5698 | Down | 1.06E-31  | 6.77E-31  |
| Unigene35688  | Potri.014G082900.1  | 21.8136 | 64.7628  | -1.5699 | Down | 5.63E-30  | 3.41E-29  |
| Unigene72721  | Potri.001G266200.1  | 16.1392 | 47.9131  | -1.5699 | Down | 4.41E-21  | 2.03E-20  |
| Unigene76951  | Potri.001G206100.2  | 7.3296  | 21.7597  | -1.5699 | Down | 2.89E-11  | 8.84E-11  |
| Unigene50831  | Potri.002G081800.5  | 3.3245  | 9.8716   | -1.5701 | Down | 2.16E-10  | 6.31E-10  |
| Unigene12091  | Potri.008G149900.2  | 7.7707  | 23.0751  | -1.5702 | Down | 2.88E-36  | 2.07E-35  |
| Unigene24396  | Potri.018G145600.4  | 5.9825  | 17.7667  | -1.5704 | Down | 1.58E-26  | 8.69E-26  |
| Unigene33952  | Potri.006G049300.1  | 46.8154 | 139.0393 | -1.5704 | Down | 3.86E-147 | 1.35E-145 |
| Unigene32693  | Potri.009G100000.1  | 2.8251  | 8.3908   | -1.5705 | Down | 1.28E-17  | 5.21E-17  |
| Unigene71336  | Potri.004G222300.1  | 13.5969 | 40.3832  | -1.5705 | Down | 1.28E-17  | 5.21E-17  |
| Unigene48168  | Potri.001G097400.1  | 18.6498 | 55.3904  | -1.5705 | Down | 1.09E-41  | 8.87E-41  |
| Unigene85894  | Potri.013G111500.5  | 81.6797 | 242.6097 | -1.5706 | Down | 3.83E-141 | 1.27E-139 |
| Unigene23160  | Potri.010G222300.1  | 60.7221 | 180.3581 | -1.5706 | Down | 4.72E-165 | 1.93E-163 |
| Unigene37858  | Potri.002G066900.2  | 6.753   | 20.0586  | -1.5706 | Down | 8.43E-25  | 4.39E-24  |
| Unigene32484  | Potri.003G148700.1  | 3.8061  | 11.3058  | -1.5707 | Down | 9.44E-17  | 3.71E-16  |
| Unigene39700  | Potri.003G048600.1  | 3.2274  | 9.5868   | -1.5707 | Down | 9.44E-17  | 3.71E-16  |
| Unigene43407  | Potri.005G019000.1  | 6.4212  | 19.0753  | -1.5708 | Down | 4.24E-31  | 2.65E-30  |
| Unigene34664  | Potri.003G097300.1  | 9.6979  | 28.8097  | -1.5708 | Down | 3.00E-38  | 2.26E-37  |
| Unigene38422  | Potri.018G127500.1  | 3.3088  | 9.8303   | -1.5709 | Down | 1.23E-08  | 3.24E-08  |
| Unigene93793  | Potri.012G095500.1  | 1.9054  | 5.6608   | -1.5709 | Down | 1.23E-08  | 3.24E-08  |
| Unigene43968  | Potri.010G145000.1  | 23.2446 | 69.0553  | -1.5709 | Down | 8.73E-67  | 1.17E-65  |
| Unigene6971   | Potri.002G226600.2  | 9.4321  | 28.0219  | -1.5709 | Down | 3.08E-30  | 1.88E-29  |
| Unigene45955  | Potri.002G128700.8  | 8.8053  | 26.1616  | -1.571  | Down | 1.58E-36  | 1.14E-35  |
| Unigene74571  | Potri.009G080200.1  | 37.8176 | 112.3697 | -1.5711 | Down | 4.34E-49  | 4.15E-48  |
| Unigene51621  | Potri.019G018400.2  | 8.629   | 25.6406  | -1.5712 | Down | 5.14E-15  | 1.88E-14  |
| Unigene39134  | Potri.016G015100.1  | 6.1341  | 18.2272  | -1.5712 | Down | 5.14E-15  | 1.88E-14  |
| Unigene34859  | Potri.010G132200.4  | 5.9756  | 17.7563  | -1.5712 | Down | 5.14E-15  | 1.88E-14  |
| Unigene33643  | Potri.009G066800.2  | 10.0986 | 30.0073  | -1.5712 | Down | 1.63E-28  | 9.49E-28  |
| Unigene18445  | Potri.005G235400.1  | 6.4597  | 19.1946  | -1.5712 | Down | 1.63E-28  | 9.49E-28  |
| Unigene43282  | Potri.003G101000.1  | 2.2365  | 6.6457   | -1.5712 | Down | 5.14E-15  | 1.88E-14  |
| Unigene17960  | Potri.001G412900.11 | 17.8209 | 52.9552  | -1.5712 | Down | 3.14E-48  | 2.96E-47  |

|               |                    |          |          |         |      |           |           |
|---------------|--------------------|----------|----------|---------|------|-----------|-----------|
| Unigene9321   | Potri.014G073300.1 | 10.8443  | 32.2252  | -1.5713 | Down | 2.41E-21  | 1.12E-20  |
| Unigene16014  | Potri.001G174600.1 | 20.6265  | 61.2963  | -1.5713 | Down | 1.19E-27  | 6.75E-27  |
| Unigene101306 | Potri.012G125500.1 | 2.6383   | 7.841    | -1.5714 | Down | 9.39E-08  | 2.33E-07  |
| Unigene36637  | Potri.001G148100.1 | 4.9619   | 14.7469  | -1.5714 | Down | 9.39E-08  | 2.33E-07  |
| Unigene46611  | Potri.008G072100.1 | 7.5642   | 22.4812  | -1.5715 | Down | 3.81E-14  | 1.34E-13  |
| Unigene42666  | Potri.008G009100.1 | 3.5006   | 10.4039  | -1.5715 | Down | 9.39E-08  | 2.33E-07  |
| Unigene15498  | Potri.007G045400.1 | 8.6999   | 25.8564  | -1.5715 | Down | 1.77E-20  | 7.99E-20  |
| Unigene42751  | Potri.004G104000.2 | 6.883    | 20.4575  | -1.5715 | Down | 7.00E-70  | 9.82E-69  |
| Unigene35349  | Potri.001G126200.1 | 4.7235   | 14.0385  | -1.5715 | Down | 9.39E-08  | 2.33E-07  |
| Unigene546    | Potri.009G125200.2 | 3.7068   | 11.0179  | -1.5716 | Down | 6.32E-26  | 3.40E-25  |
| Unigene14227  | Potri.009G031400.1 | 44.4898  | 132.2561 | -1.5718 | Down | 3.46E-130 | 1.03E-128 |
| Unigene8208   | Potri.014G025700.1 | 12.5274  | 37.2423  | -1.5719 | Down | 1.69E-30  | 1.04E-29  |
| Unigene32254  | Potri.006G235400.4 | 40.7032  | 121.0093 | -1.5719 | Down | 2.21E-252 | 1.54E-250 |
| Unigene4805   | Potri.005G236200.2 | 10.9136  | 32.4458  | -1.5719 | Down | 9.51E-19  | 4.04E-18  |
| Unigene8402   | Potri.002G003700.1 | 5.8698   | 17.4509  | -1.5719 | Down | 9.51E-19  | 4.04E-18  |
| Unigene18256  | Potri.015G047100.1 | 141.9303 | 421.9939 | -1.572  | Down | 0         | 0         |
| Unigene33059  | Potri.011G119400.1 | 7.7895   | 23.1589  | -1.572  | Down | 3.37E-24  | 1.72E-23  |
| Unigene68954  | Potri.006G277400.2 | 1.4593   | 4.3392   | -1.5722 | Down | 7.22E-07  | 1.68E-06  |
| Unigene7191   | Potri.006G160400.3 | 2.6719   | 7.9449   | -1.5722 | Down | 7.22E-07  | 1.68E-06  |
| Unigene22237  | Potri.001G008800.1 | 12.2035  | 36.2873  | -1.5722 | Down | 9.58E-94  | 1.88E-92  |
| Unigene94834  | Potri.006G096100.1 | 7.6593   | 22.7773  | -1.5723 | Down | 2.41E-33  | 1.60E-32  |
| Unigene18935  | Potri.018G086000.2 | 7.2939   | 21.6925  | -1.5724 | Down | 6.54E-38  | 4.88E-37  |
| Unigene6692   | Potri.018G048600.1 | 7.1769   | 21.345   | -1.5725 | Down | 5.15E-17  | 2.05E-16  |
| Unigene12708  | Potri.010G227200.1 | 2.8723   | 8.5426   | -1.5725 | Down | 1.75E-32  | 1.14E-31  |
| Unigene70610  | Potri.007G017600.1 | 39.724   | 118.1445 | -1.5725 | Down | 6.83E-48  | 6.39E-47  |
| Unigene50882  | Potri.019G128000.2 | 3.1253   | 9.296    | -1.5726 | Down | 1.57E-11  | 4.86E-11  |
| Unigene18483  | Potri.010G125600.1 | 6.61     | 19.6613  | -1.5726 | Down | 1.61E-71  | 2.31E-70  |
| Unigene76347  | Potri.008G150500.2 | 15.2514  | 45.3646  | -1.5726 | Down | 1.32E-21  | 6.19E-21  |
| Unigene42955  | Potri.008G059500.3 | 16.7719  | 49.8851  | -1.5726 | Down | 2.23E-72  | 3.25E-71  |
| Unigene88094  | Potri.018G070000.5 | 93.9903  | 279.576  | -1.5727 | Down | 4.36E-180 | 1.99E-178 |
| Unigene2664   | Potri.019G085300.1 | 2.4817   | 7.3826   | -1.5728 | Down | 3.80E-16  | 1.45E-15  |
| Unigene13283  | Potri.001G392200.5 | 4.1239   | 12.2678  | -1.5728 | Down | 3.80E-16  | 1.45E-15  |
| Unigene77471  | Potri.T093400.1    | 17.6002  | 52.3625  | -1.5729 | Down | 2.52E-25  | 1.33E-24  |
| Unigene3556   | Potri.015G108100.1 | 36.1107  | 107.4274 | -1.5729 | Down | 1.99E-54  | 2.12E-53  |
| Unigene10624  | Potri.010G225200.1 | 4.2561   | 12.6624  | -1.5729 | Down | 3.06E-96  | 6.23E-95  |
| Unigene40790  | Potri.002G166700.2 | 11.3971  | 33.9063  | -1.5729 | Down | 9.65E-21  | 4.40E-20  |
| Unigene64203  | Potri.019G092000.1 | 1.8561   | 5.5231   | -1.5732 | Down | 5.61E-06  | 1.21E-05  |
| Unigene35743  | Potri.015G096300.1 | 11.0843  | 32.9822  | -1.5732 | Down | 2.80E-15  | 1.03E-14  |
| Unigene9743   | Potri.014G084500.1 | 5.8673   | 17.4587  | -1.5732 | Down | 1.17E-10  | 3.47E-10  |

|              |                    |         |          |         |      |           |           |
|--------------|--------------------|---------|----------|---------|------|-----------|-----------|
| Unigene38623 | Potri.011G045500.1 | 3.9361  | 11.7123  | -1.5732 | Down | 7.08E-20  | 3.14E-19  |
| Unigene25847 | Potri.009G121400.2 | 10.0853 | 30.0096  | -1.5732 | Down | 2.80E-15  | 1.03E-14  |
| Unigene5141  | Potri.007G147300.1 | 13.8635 | 41.2521  | -1.5732 | Down | 7.08E-20  | 3.14E-19  |
| Unigene52364 | Potri.005G014700.1 | 1.615   | 4.8057   | -1.5732 | Down | 5.61E-06  | 1.21E-05  |
| Unigene77650 | Potri.013G128100.1 | 16.2382 | 48.3262  | -1.5734 | Down | 1.35E-23  | 6.74E-23  |
| Unigene32548 | Potri.008G080900.1 | 7.0734  | 21.0512  | -1.5734 | Down | 2.66E-172 | 1.14E-170 |
| Unigene24301 | Potri.014G120900.1 | 4.1272  | 12.2834  | -1.5735 | Down | 5.19E-19  | 2.23E-18  |
| Unigene49078 | Potri.004G163300.1 | 49.7658 | 148.1127 | -1.5735 | Down | 7.74E-219 | 4.48E-217 |
| Unigene92835 | Potri.001G210500.3 | 90.4276 | 269.1382 | -1.5735 | Down | 4.78E-269 | 3.64E-267 |
| Unigene92041 | Potri.012G073900.1 | 45.2216 | 134.6027 | -1.5736 | Down | 1.31E-120 | 3.56E-119 |
| Unigene3298  | Potri.006G243000.1 | 1.5662  | 4.6624   | -1.5738 | Down | 8.82E-10  | 2.48E-09  |
| Unigene51047 | Potri.015G088300.2 | 33.7635 | 100.5245 | -1.574  | Down | 4.92E-66  | 6.51E-65  |
| Unigene2323  | Potri.001G087400.1 | 4.8246  | 14.3638  | -1.574  | Down | 7.20E-22  | 3.41E-21  |
| Unigene18418 | Potri.013G062800.1 | 18.2295 | 54.2783  | -1.5741 | Down | 4.11E-77  | 6.46E-76  |
| Unigene39178 | Potri.004G004100.1 | 11.0592 | 32.928   | -1.5741 | Down | 1.38E-25  | 7.36E-25  |
| Unigene29675 | Potri.017G057700.3 | 7.8069  | 23.2467  | -1.5742 | Down | 2.81E-17  | 1.13E-16  |
| Unigene16992 | Potri.003G097300.2 | 15.5748 | 46.3808  | -1.5743 | Down | 4.08E-44  | 3.51E-43  |
| Unigene5114  | Potri.014G144100.1 | 22.2663 | 66.3132  | -1.5744 | Down | 7.50E-36  | 5.32E-35  |
| Unigene15284 | Potri.007G001500.3 | 14.7097 | 43.8075  | -1.5744 | Down | 3.81E-32  | 2.46E-31  |
| Unigene49497 | Potri.002G069100.1 | 17.1229 | 50.9953  | -1.5744 | Down | 7.50E-36  | 5.32E-35  |
| Unigene40135 | Potri.001G240400.3 | 27.6739 | 82.4229  | -1.5745 | Down | 1.19E-121 | 3.27E-120 |
| Unigene46183 | Potri.013G014400.3 | 6.968   | 20.755   | -1.5746 | Down | 2.07E-16  | 8.02E-16  |
| Unigene29685 | Potri.011G104000.1 | 7.5263  | 22.4179  | -1.5746 | Down | 2.07E-16  | 8.02E-16  |
| Unigene56500 | Potri.007G098400.2 | 3.1236  | 9.304    | -1.5746 | Down | 4.43E-05  | 8.81E-05  |
| Unigene16777 | Potri.005G229700.1 | 1.7812  | 5.3054   | -1.5746 | Down | 4.43E-05  | 8.81E-05  |
| Unigene95691 | Potri.010G062500.1 | 1.461   | 4.3519   | -1.5747 | Down | 4.43E-05  | 8.81E-05  |
| Unigene20340 | Potri.002G086500.1 | 1.5133  | 4.5076   | -1.5747 | Down | 4.43E-05  | 8.81E-05  |
| Unigene17730 | Potri.006G233000.2 | 50.681  | 150.9783 | -1.5748 | Down | 2.68E-106 | 6.17E-105 |
| Unigene51767 | Potri.014G193800.1 | 9.6703  | 28.81    | -1.5749 | Down | 5.38E-23  | 2.64E-22  |
| Unigene44863 | Potri.006G013200.2 | 3.3352  | 9.9363   | -1.5749 | Down | 5.38E-23  | 2.64E-22  |
| Unigene5902  | Potri.003G101600.1 | 34.7272 | 103.4654 | -1.575  | Down | 1.30E-54  | 1.40E-53  |
| Unigene52485 | Potri.008G203400.4 | 8.2601  | 24.6117  | -1.5751 | Down | 1.53E-15  | 5.70E-15  |
| Unigene39709 | Potri.002G114500.3 | 3.0842  | 9.1896   | -1.5751 | Down | 1.53E-15  | 5.70E-15  |
| Unigene16192 | Potri.018G015200.1 | 23.9979 | 71.506   | -1.5752 | Down | 8.14E-40  | 6.36E-39  |
| Unigene13352 | Potri.015G088300.2 | 28.3333 | 84.4276  | -1.5752 | Down | 4.11E-36  | 2.93E-35  |
| Unigene89004 | Potri.003G083300.2 | 15.2001 | 45.2955  | -1.5753 | Down | 2.09E-32  | 1.35E-31  |
| Unigene50024 | Potri.007G055800.2 | 4.2051  | 12.5321  | -1.5754 | Down | 2.08E-18  | 8.74E-18  |
| Unigene52933 | Potri.014G196900.1 | 15.59   | 46.4641  | -1.5755 | Down | 5.51E-25  | 2.88E-24  |
| Unigene1344  | Potri.013G000600.1 | 18.2652 | 54.4365  | -1.5755 | Down | 4.19E-105 | 9.49E-104 |



|               |                    |         |          |         |      |           |           |
|---------------|--------------------|---------|----------|---------|------|-----------|-----------|
| Unigene23648  | Potri.008G147200.1 | 9.1328  | 27.2193  | -1.5755 | Down | 5.51E-25  | 2.88E-24  |
| Unigene13382  | Potri.008G180000.1 | 6.1984  | 18.4746  | -1.5756 | Down | 3.55E-51  | 3.55E-50  |
| Unigene93190  | Potri.008G116400.1 | 2.057   | 6.1312   | -1.5756 | Down | 5.07E-08  | 1.28E-07  |
| Unigene29660  | Potri.007G025600.1 | 1.3103  | 3.9056   | -1.5756 | Down | 5.07E-08  | 1.28E-07  |
| Unigene41829  | Potri.002G008700.1 | 2.7698  | 8.2559   | -1.5756 | Down | 5.07E-08  | 1.28E-07  |
| Unigene110877 | Potri.011G167700.3 | 9.8589  | 29.3865  | -1.5757 | Down | 1.13E-14  | 4.06E-14  |
| Unigene5657   | Potri.005G010300.1 | 20.5948 | 61.3872  | -1.5757 | Down | 6.16E-41  | 4.94E-40  |
| Unigene1900   | Potri.001G358800.1 | 7.7305  | 23.0423  | -1.5757 | Down | 7.78E-28  | 4.44E-27  |
| Unigene32000  | Potri.018G068100.3 | 5.5142  | 16.4379  | -1.5758 | Down | 4.17E-82  | 7.02E-81  |
| Unigene80244  | Potri.002G006200.3 | 22.0475 | 65.728   | -1.5759 | Down | 1.57E-33  | 1.05E-32  |
| Unigene74031  | Potri.001G317600.1 | 38.171  | 113.7955 | -1.5759 | Down | 1.86E-49  | 1.79E-48  |
| Unigene12975  | Potri.001G093500.1 | 3.1996  | 9.5387   | -1.5759 | Down | 1.53E-17  | 6.22E-17  |
| Unigene37083  | Potri.007G072000.1 | 5.3463  | 15.9401  | -1.576  | Down | 6.37E-11  | 1.92E-10  |
| Unigene33091  | Potri.014G074200.1 | 9.152   | 27.287   | -1.5761 | Down | 3.23E-39  | 2.49E-38  |
| Unigene18810  | Potri.012G092000.1 | 19.2082 | 57.2699  | -1.5761 | Down | 5.70E-58  | 6.53E-57  |
| Unigene44933  | Potri.006G204600.1 | 25.0318 | 74.6406  | -1.5762 | Down | 1.13E-78  | 1.81E-77  |
| Unigene35241  | Potri.008G080900.1 | 17.4902 | 52.1575  | -1.5763 | Down | 3.37E-41  | 2.72E-40  |
| Unigene113325 | Potri.002G246100.3 | 8.256   | 24.6194  | -1.5763 | Down | 8.37E-14  | 2.89E-13  |
| Unigene40541  | Potri.018G039800.1 | 7.8466  | 23.4005  | -1.5764 | Down | 1.13E-16  | 4.42E-16  |
| Unigene37306  | Potri.014G153700.1 | 5.7835  | 17.248   | -1.5764 | Down | 1.13E-16  | 4.42E-16  |
| Unigene74043  | Potri.013G111500.5 | 30.8506 | 92.0129  | -1.5765 | Down | 2.45E-40  | 1.93E-39  |
| Unigene37796  | Potri.006G166300.1 | 12.0416 | 35.9135  | -1.5765 | Down | 1.55E-19  | 6.78E-19  |
| Unigene7510   | Potri.005G195300.1 | 4.3882  | 13.0876  | -1.5765 | Down | 1.55E-19  | 6.78E-19  |
| Unigene32989  | Potri.016G104700.1 | 5.0036  | 14.9247  | -1.5767 | Down | 4.26E-28  | 2.45E-27  |
| Unigene32534  | Potri.006G230900.2 | 3.5984  | 10.7334  | -1.5767 | Down | 6.04E-31  | 3.77E-30  |
| Unigene32592  | Potri.002G141300.3 | 7.3857  | 22.0319  | -1.5768 | Down | 3.69E-45  | 3.24E-44  |
| Unigene99295  | Potri.013G021700.1 | 1.1277  | 3.3643   | -1.5769 | Down | 3.58E-04  | 6.47E-04  |
| Unigene42401  | Potri.005G192000.1 | 7.4552  | 22.2404  | -1.5769 | Down | 1.08E-70  | 1.53E-69  |
| Unigene46324  | Potri.T052100.3    | 5.4894  | 16.3774  | -1.577  | Down | 4.78E-10  | 1.37E-09  |
| Unigene45469  | Potri.015G050800.1 | 25.4649 | 75.9738  | -1.577  | Down | 8.29E-138 | 2.67E-136 |
| Unigene4217   | Potri.014G155100.1 | 23.4626 | 70       | -1.577  | Down | 2.67E-44  | 2.30E-43  |
| Unigene29351  | Potri.014G109700.2 | 15.6082 | 46.5665  | -1.577  | Down | 2.67E-44  | 2.30E-43  |
| Unigene25340  | Potri.013G150300.2 | 7.1571  | 21.353   | -1.577  | Down | 2.20E-24  | 1.13E-23  |
| Unigene41987  | Potri.012G097500.1 | 3.0593  | 9.1272   | -1.577  | Down | 3.88E-07  | 9.22E-07  |
| Unigene39598  | Potri.011G132800.1 | 1.4561  | 4.3443   | -1.577  | Down | 3.58E-04  | 6.47E-04  |
| Unigene30667  | Potri.010G190300.1 | 2.5255  | 7.5347   | -1.577  | Down | 3.88E-07  | 9.22E-07  |
| Unigene57918  | Potri.010G104000.1 | 1.9792  | 5.9048   | -1.577  | Down | 3.58E-04  | 6.47E-04  |
| Unigene6158   | Potri.010G066000.1 | 11.6142 | 34.6507  | -1.577  | Down | 2.20E-24  | 1.13E-23  |
| Unigene31019  | Potri.007G087200.4 | 1.7318  | 5.1667   | -1.577  | Down | 3.58E-04  | 6.47E-04  |

|               |                    |         |          |         |      |           |           |
|---------------|--------------------|---------|----------|---------|------|-----------|-----------|
| Unigene30625  | Potri.006G080700.3 | 1.6663  | 4.9714   | -1.577  | Down | 3.58E-04  | 6.47E-04  |
| Unigene33390  | Potri.006G000500.1 | 6.2567  | 18.6667  | -1.577  | Down | 1.14E-18  | 4.82E-18  |
| Unigene55463  | Potri.005G247700.1 | 1.7537  | 5.2321   | -1.577  | Down | 3.88E-07  | 9.22E-07  |
| Unigene19891  | Potri.004G128600.1 | 1.3248  | 3.9526   | -1.577  | Down | 3.58E-04  | 6.47E-04  |
| Unigene53417  | Potri.003G045700.5 | 19.7468 | 58.9141  | -1.577  | Down | 3.10E-27  | 1.74E-26  |
| Unigene240    | Potri.003G043300.3 | 5.3389  | 15.9283  | -1.577  | Down | 5.59E-50  | 5.46E-49  |
| Unigene115264 | Potri.002G244000.4 | 1.6954  | 5.0583   | -1.577  | Down | 3.58E-04  | 6.47E-04  |
| Unigene2123   | Potri.002G025100.2 | 1.3934  | 4.1571   | -1.577  | Down | 3.88E-07  | 9.22E-07  |
| Unigene42219  | Potri.001G174900.1 | 5.5992  | 16.7052  | -1.577  | Down | 8.33E-16  | 3.14E-15  |
| Unigene118421 | Potri.009G036700.2 | 1.1045  | 3.2954   | -1.5771 | Down | 3.58E-04  | 6.47E-04  |
| Unigene29129  | Potri.008G195900.4 | 8.7414  | 26.0834  | -1.5772 | Down | 1.93E-43  | 1.64E-42  |
| Unigene6080   | Potri.015G005400.3 | 27.6384 | 82.4785  | -1.5773 | Down | 4.24E-51  | 4.23E-50  |
| Unigene80441  | Potri.005G172400.1 | 37.9012 | 113.1019 | -1.5773 | Down | 8.95E-57  | 1.00E-55  |
| Unigene90914  | Potri.012G124400.1 | 30.1014 | 89.8376  | -1.5775 | Down | 4.51E-72  | 6.55E-71  |
| Unigene16958  | Potri.008G038700.1 | 7.0055  | 20.9085  | -1.5775 | Down | 8.36E-18  | 3.43E-17  |
| Unigene11921  | Potri.015G003100.3 | 7.684   | 22.9383  | -1.5778 | Down | 1.18E-22  | 5.71E-22  |
| Unigene34495  | Potri.011G062200.2 | 5.2814  | 15.7659  | -1.5778 | Down | 4.63E-12  | 1.47E-11  |
| Unigene39692  | Potri.005G222900.3 | 7.2068  | 21.5138  | -1.5778 | Down | 3.62E-75  | 5.53E-74  |
| Unigene5725   | Potri.002G159900.2 | 22.5197 | 67.2266  | -1.5778 | Down | 3.16E-114 | 7.98E-113 |
| Unigene47868  | Potri.015G043200.1 | 12.6587 | 37.7908  | -1.5779 | Down | 2.41E-30  | 1.47E-29  |
| Unigene42981  | Potri.008G083500.2 | 16.8691 | 50.3628  | -1.578  | Down | 4.55E-100 | 9.76E-99  |
| Unigene35044  | Potri.006G148700.1 | 7.048   | 21.0418  | -1.578  | Down | 7.93E-64  | 1.01E-62  |
| Unigene82591  | Potri.003G004100.1 | 35.4488 | 105.8313 | -1.578  | Down | 3.55E-56  | 3.93E-55  |
| Unigene45629  | Potri.018G072600.2 | 1.8784  | 5.6086   | -1.5781 | Down | 3.61E-09  | 9.81E-09  |
| Unigene9067   | Potri.015G019100.1 | 7.1533  | 21.3587  | -1.5781 | Down | 6.16E-17  | 2.44E-16  |
| Unigene39401  | Potri.014G073400.3 | 4.8232  | 14.4013  | -1.5781 | Down | 1.20E-24  | 6.23E-24  |
| Unigene22034  | Potri.011G137200.1 | 9.1409  | 27.2932  | -1.5781 | Down | 6.63E-86  | 1.18E-84  |
| Unigene35223  | Potri.009G080200.1 | 32.9114 | 98.268   | -1.5781 | Down | 1.16E-47  | 1.08E-46  |
| Unigene91242  | Potri.008G189900.3 | 9.5291  | 28.4523  | -1.5781 | Down | 1.20E-24  | 6.23E-24  |
| Unigene52177  | Potri.005G089800.1 | 1.2363  | 3.6913   | -1.5781 | Down | 3.61E-09  | 9.81E-09  |
| Unigene52837  | Potri.017G047600.1 | 12.1686 | 36.3377  | -1.5783 | Down | 8.61E-22  | 4.06E-21  |
| Unigene23886  | Potri.010G114900.2 | 12.5723 | 37.5437  | -1.5783 | Down | 1.85E-54  | 1.98E-53  |
| Unigene34124  | Potri.010G094800.5 | 4.3002  | 12.8411  | -1.5783 | Down | 8.61E-22  | 4.06E-21  |
| Unigene28130  | Potri.003G137200.1 | 10.931  | 32.644   | -1.5784 | Down | 1.24E-26  | 6.81E-26  |
| Unigene3610   | Potri.016G020100.1 | 28.1877 | 84.1841  | -1.5785 | Down | 8.80E-96  | 1.78E-94  |
| Unigene13267  | Potri.006G003200.1 | 6.4024  | 19.1226  | -1.5786 | Down | 9.22E-51  | 9.15E-50  |
| Unigene45156  | Potri.014G075100.3 | 27.7598 | 82.9167  | -1.5787 | Down | 5.58E-143 | 1.87E-141 |
| Unigene18706  | Potri.002G255400.3 | 14.0293 | 41.9048  | -1.5787 | Down | 2.80E-38  | 2.11E-37  |
| Unigene6502   | Potri.019G085200.1 | 3.3723  | 10.0738  | -1.5788 | Down | 4.54E-16  | 1.73E-15  |

|               |                    |         |          |         |      |           |           |
|---------------|--------------------|---------|----------|---------|------|-----------|-----------|
| Unigene50836  | Potri.017G120100.1 | 3.2434  | 9.6889   | -1.5788 | Down | 3.46E-11  | 1.05E-10  |
| Unigene3681   | Potri.009G029800.2 | 2.5724  | 7.6843   | -1.5788 | Down | 3.01E-06  | 6.66E-06  |
| Unigene60891  | Potri.005G180700.1 | 4.7433  | 14.1693  | -1.5788 | Down | 3.46E-11  | 1.05E-10  |
| Unigene114721 | Potri.005G092700.1 | 2.984   | 8.9138   | -1.5788 | Down | 3.01E-06  | 6.66E-06  |
| Unigene20720  | Potri.003G060900.1 | 3.3088  | 9.8843   | -1.5788 | Down | 3.01E-06  | 6.66E-06  |
| Unigene25262  | Potri.001G472600.8 | 8.2333  | 24.595   | -1.5788 | Down | 4.54E-16  | 1.73E-15  |
| Unigene67102  | Potri.008G215300.3 | 1.9491  | 5.8226   | -1.5789 | Down | 3.01E-06  | 6.66E-06  |
| Unigene7502   | Potri.001G345500.1 | 15.2221 | 45.4773  | -1.579  | Down | 1.72E-63  | 2.18E-62  |
| Unigene88129  | Potri.015G117800.1 | 19.6193 | 58.6188  | -1.5791 | Down | 2.11E-39  | 1.63E-38  |
| Unigene49090  | Potri.016G075700.2 | 20.2979 | 60.6516  | -1.5792 | Down | 5.31E-53  | 5.51E-52  |
| Unigene37464  | Potri.002G256400.3 | 18.0281 | 53.8673  | -1.5792 | Down | 3.33E-46  | 3.00E-45  |
| Unigene28181  | Potri.002G009100.1 | 15.5011 | 46.3174  | -1.5792 | Down | 9.59E-30  | 5.78E-29  |
| Unigene12300  | Potri.014G144100.1 | 10.2201 | 30.5408  | -1.5793 | Down | 9.92E-32  | 6.32E-31  |
| Unigene17702  | Potri.T030000.1    | 26.5875 | 79.4571  | -1.5794 | Down | 2.50E-77  | 3.95E-76  |
| Unigene35452  | Potri.018G132000.1 | 20.6129 | 61.5997  | -1.5794 | Down | 1.53E-38  | 1.16E-37  |
| Unigene34401  | Potri.013G090300.1 | 7.7141  | 23.054   | -1.5794 | Down | 6.16E-59  | 7.19E-58  |
| Unigene88731  | Potri.012G077900.1 | 9.2424  | 27.6199  | -1.5794 | Down | 4.62E-20  | 2.06E-19  |
| Unigene295    | Potri.012G034600.1 | 1.2108  | 3.6188   | -1.5796 | Down | 2.74E-08  | 7.05E-08  |
| Unigene8215   | Potri.010G229800.2 | 2.9273  | 8.7492   | -1.5796 | Down | 2.74E-08  | 7.05E-08  |
| Unigene51383  | Potri.008G192200.2 | 3.0112  | 8.9998   | -1.5796 | Down | 2.74E-08  | 7.05E-08  |
| Unigene10658  | Potri.006G101300.3 | 4.4992  | 13.4472  | -1.5796 | Down | 6.98E-29  | 4.10E-28  |
| Unigene45530  | Potri.011G093200.1 | 4.4759  | 13.3793  | -1.5798 | Down | 4.81E-24  | 2.44E-23  |
| Unigene104    | Potri.003G135300.1 | 7.0157  | 20.9717  | -1.5798 | Down | 3.92E-93  | 7.65E-92  |
| Unigene119    | Potri.002G194000.1 | 11.5156 | 34.4268  | -1.5799 | Down | 1.46E-221 | 8.55E-220 |
| Unigene91385  | Potri.017G143000.1 | 3.5693  | 10.6712  | -1.58   | Down | 2.59E-10  | 7.53E-10  |
| Unigene41085  | Potri.010G185800.3 | 6.4869  | 19.3937  | -1.58   | Down | 2.59E-10  | 7.53E-10  |
| Unigene9921   | Potri.006G105400.1 | 3.9366  | 11.7693  | -1.58   | Down | 2.59E-10  | 7.53E-10  |
| Unigene21842  | Potri.010G221700.2 | 9.2929  | 27.7852  | -1.5801 | Down | 1.45E-49  | 1.40E-48  |
| Unigene23594  | Potri.002G153600.3 | 6.1901  | 18.5108  | -1.5803 | Down | 5.85E-36  | 4.16E-35  |
| Unigene44006  | Potri.016G072700.2 | 12.8442 | 38.414   | -1.5805 | Down | 3.82E-29  | 2.26E-28  |
| Unigene28941  | Potri.011G103500.1 | 6.3889  | 19.1073  | -1.5805 | Down | 1.21E-54  | 1.30E-53  |
| Unigene10149  | Potri.006G081800.2 | 10.3267 | 30.8861  | -1.5806 | Down | 3.95E-31  | 2.47E-30  |
| Unigene34254  | Potri.005G010800.2 | 8.1568  | 24.4012  | -1.5809 | Down | 1.32E-69  | 1.84E-68  |
| Unigene61603  | Potri.002G143000.1 | 8.0016  | 23.9387  | -1.581  | Down | 2.87E-30  | 1.76E-29  |
| Unigene10797  | Potri.014G066000.1 | 5.645   | 16.8911  | -1.5812 | Down | 3.93E-118 | 1.04E-116 |
| Unigene17119  | Potri.007G014600.2 | 21.6527 | 64.7901  | -1.5812 | Down | 5.87E-62  | 7.23E-61  |
| Unigene19410  | Potri.012G074700.1 | 53.9834 | 161.5422 | -1.5813 | Down | 2.52E-113 | 6.30E-112 |
| Unigene34431  | Potri.016G131900.1 | 11.3411 | 33.9402  | -1.5814 | Down | 2.16E-31  | 1.36E-30  |
| Unigene36541  | Potri.016G075700.2 | 6.008   | 17.98    | -1.5814 | Down | 1.83E-17  | 7.41E-17  |

|               |                     |         |         |         |      |           |           |
|---------------|---------------------|---------|---------|---------|------|-----------|-----------|
| Unigene40334  | Potri.015G108900.2  | 4.5433  | 13.5965 | -1.5814 | Down | 1.85E-19  | 8.08E-19  |
| Unigene67154  | Potri.014G114100.1  | 2.7127  | 8.1182  | -1.5814 | Down | 1.95E-09  | 5.40E-09  |
| Unigene28645  | Potri.012G056200.1  | 12.9827 | 38.8531 | -1.5814 | Down | 2.75E-43  | 2.33E-42  |
| Unigene32588  | Potri.011G071000.1  | 2.444   | 7.314   | -1.5814 | Down | 2.09E-29  | 1.25E-28  |
| Unigene20372  | Potri.011G057300.4  | 4.7281  | 14.1497 | -1.5814 | Down | 1.95E-09  | 5.40E-09  |
| Unigene119359 | Potri.009G051900.1  | 1.4125  | 4.2271  | -1.5814 | Down | 2.09E-07  | 5.06E-07  |
| Unigene16640  | Potri.008G119100.1  | 13.3095 | 39.8312 | -1.5814 | Down | 1.85E-19  | 8.08E-19  |
| Unigene68731  | Potri.007G132900.2  | 2.7975  | 8.3719  | -1.5814 | Down | 2.09E-07  | 5.06E-07  |
| Unigene31678  | Potri.005G210800.1  | 1.865   | 5.5813  | -1.5814 | Down | 2.36E-05  | 4.82E-05  |
| Unigene39486  | Potri.005G101500.1  | 5.4247  | 16.2345 | -1.5814 | Down | 2.33E-35  | 1.63E-34  |
| Unigene7405   | Potri.005G044700.1  | 5.4496  | 16.3089 | -1.5814 | Down | 1.88E-11  | 5.80E-11  |
| Unigene40578  | Potri.005G036200.1  | 6.8277  | 20.4332 | -1.5814 | Down | 1.84E-13  | 6.27E-13  |
| Unigene99987  | Potri.004G133600.3  | 1.5     | 4.489   | -1.5814 | Down | 1.88E-11  | 5.80E-11  |
| Unigene17679  | Potri.003G110000.5  | 11.7103 | 35.0452 | -1.5814 | Down | 1.97E-25  | 1.04E-24  |
| Unigene41161  | Potri.003G001000.1  | 1.9183  | 5.7407  | -1.5814 | Down | 2.36E-05  | 4.82E-05  |
| Unigene30646  | Potri.001G151700.4  | 5.9946  | 17.9398 | -1.5814 | Down | 1.95E-09  | 5.40E-09  |
| Unigene22193  | Potri.001G148900.3  | 6.2166  | 18.6043 | -1.5814 | Down | 2.33E-35  | 1.63E-34  |
| Unigene50545  | Potri.011G148200.7  | 1.6217  | 4.8533  | -1.5815 | Down | 2.36E-05  | 4.82E-05  |
| Unigene45224  | Potri.003G068000.10 | 3.3327  | 9.9738  | -1.5815 | Down | 1.92E-23  | 9.56E-23  |
| Unigene85271  | Potri.013G006100.4  | 27.5523 | 82.4707 | -1.5817 | Down | 2.28E-48  | 2.16E-47  |
| Unigene83508  | Potri.008G100600.1  | 29.2871 | 87.6633 | -1.5817 | Down | 2.28E-48  | 2.16E-47  |
| Unigene26006  | Potri.006G132300.1  | 18.2015 | 54.4819 | -1.5817 | Down | 2.18E-46  | 1.97E-45  |
| Unigene775    | Potri.010G064300.1  | 3.8098  | 11.4042 | -1.5818 | Down | 1.83E-38  | 1.38E-37  |
| Unigene43225  | Potri.017G138500.5  | 5.3873  | 16.1272 | -1.5819 | Down | 1.57E-30  | 9.68E-30  |
| Unigene36926  | Potri.011G127300.1  | 11.2849 | 33.7863 | -1.582  | Down | 1.40E-22  | 6.80E-22  |
| Unigene25855  | Potri.002G018400.1  | 17.2852 | 51.7507 | -1.582  | Down | 1.40E-22  | 6.80E-22  |
| Unigene90649  | Potri.010G192200.1  | 13.9034 | 41.6315 | -1.5822 | Down | 1.23E-33  | 8.21E-33  |
| Unigene19235  | Potri.011G094900.1  | 9.0585  | 27.125  | -1.5823 | Down | 1.35E-16  | 5.27E-16  |
| Unigene16481  | Potri.002G038700.2  | 6.1471  | 18.4089 | -1.5824 | Down | 1.35E-14  | 4.84E-14  |
| Unigene361    | Potri.012G069900.1  | 10.1316 | 30.3434 | -1.5825 | Down | 9.75E-96  | 1.97E-94  |
| Unigene53850  | Potri.011G058500.1  | 12.1726 | 36.4554 | -1.5825 | Down | 1.08E-25  | 5.75E-25  |
| Unigene15734  | Potri.013G084100.5  | 6.3869  | 19.1293 | -1.5826 | Down | 1.05E-23  | 5.27E-23  |
| Unigene12170  | Potri.001G126200.1  | 2.1486  | 6.4352  | -1.5826 | Down | 1.37E-12  | 4.47E-12  |
| Unigene46603  | Potri.008G034800.2  | 20.9531 | 62.7594 | -1.5827 | Down | 8.92E-33  | 5.85E-32  |
| Unigene39928  | Potri.017G078900.1  | 1.5008  | 4.4957  | -1.5828 | Down | 1.41E-10  | 4.14E-10  |
| Unigene15023  | Potri.012G142200.1  | 55.3228 | 165.725 | -1.5828 | Down | 4.13E-128 | 1.20E-126 |
| Unigene49431  | Potri.010G254700.2  | 11.9475 | 35.7899 | -1.5828 | Down | 1.01E-19  | 4.45E-19  |
| Unigene23702  | Potri.005G016800.1  | 6.0516  | 18.1275 | -1.5828 | Down | 6.86E-49  | 6.54E-48  |
| Unigene26847  | Potri.004G037600.3  | 5.0976  | 15.2704 | -1.5828 | Down | 1.41E-10  | 4.14E-10  |

|               |                    |          |          |         |      |           |           |
|---------------|--------------------|----------|----------|---------|------|-----------|-----------|
| Unigene15807  | Potri.004G001500.2 | 11.6899  | 35.0165  | -1.5828 | Down | 7.57E-40  | 5.92E-39  |
| Unigene119055 | Potri.009G009100.1 | 2.7211   | 8.1514   | -1.5829 | Down | 1.41E-10  | 4.14E-10  |
| Unigene15266  | Potri.001G162800.1 | 36.8741  | 110.4711 | -1.583  | Down | 4.80E-59  | 5.61E-58  |
| Unigene5023   | Potri.010G154000.1 | 13.3074  | 39.8713  | -1.5831 | Down | 6.48E-32  | 4.15E-31  |
| Unigene82891  | Potri.T037100.2    | 36.0328  | 107.9693 | -1.5832 | Down | 3.47E-58  | 3.99E-57  |
| Unigene22998  | Potri.014G037700.1 | 2.7502   | 8.2407   | -1.5832 | Down | 1.48E-08  | 3.87E-08  |
| Unigene21992  | Potri.012G120000.1 | 3.0449   | 9.1237   | -1.5832 | Down | 7.68E-23  | 3.75E-22  |
| Unigene3870   | Potri.002G090200.1 | 10.2016  | 30.5682  | -1.5832 | Down | 9.96E-16  | 3.74E-15  |
| Unigene42619  | Potri.001G094500.1 | 3.9273   | 11.7672  | -1.5832 | Down | 4.74E-46  | 4.25E-45  |
| Unigene53472  | Potri.005G155600.4 | 4.8421   | 14.5091  | -1.5833 | Down | 9.96E-16  | 3.74E-15  |
| Unigene44650  | Potri.002G127900.1 | 1.3625   | 4.0827   | -1.5833 | Down | 1.48E-08  | 3.87E-08  |
| Unigene23182  | Potri.018G107500.1 | 30.3995  | 91.1005  | -1.5834 | Down | 1.12E-104 | 2.52E-103 |
| Unigene68369  | Potri.016G142200.1 | 3.797    | 11.3784  | -1.5834 | Down | 6.06E-28  | 3.47E-27  |
| Unigene53964  | Potri.T012200.3    | 11.0592  | 33.1447  | -1.5835 | Down | 5.89E-26  | 3.17E-25  |
| Unigene19137  | Potri.008G117700.1 | 12.471   | 37.3759  | -1.5835 | Down | 5.89E-26  | 3.17E-25  |
| Unigene7735   | Potri.010G102200.2 | 7.9982   | 23.9723  | -1.5836 | Down | 2.72E-48  | 2.56E-47  |
| Unigene1054   | Potri.008G128800.1 | 3.426    | 10.2696  | -1.5838 | Down | 4.56E-29  | 2.69E-28  |
| Unigene7381   | Potri.004G088600.2 | 17.8618  | 53.5425  | -1.5838 | Down | 3.01E-39  | 2.32E-38  |
| Unigene48865  | Potri.019G037900.4 | 11.9985  | 35.97    | -1.5839 | Down | 3.55E-32  | 2.29E-31  |
| Unigene26148  | Potri.018G111600.2 | 1.0105   | 3.0293   | -1.5839 | Down | 1.62E-06  | 3.66E-06  |
| Unigene23747  | Potri.006G241500.2 | 7.4648   | 22.3773  | -1.5839 | Down | 1.03E-69  | 1.44E-68  |
| Unigene15079  | Potri.006G216200.1 | 44.2646  | 132.7    | -1.5839 | Down | 2.72E-108 | 6.42E-107 |
| Unigene81612  | Potri.004G094600.1 | 33.6427  | 100.857  | -1.5839 | Down | 1.64E-52  | 1.69E-51  |
| Unigene12477  | Potri.003G069300.1 | 5.3175   | 15.9412  | -1.5839 | Down | 7.36E-17  | 2.90E-16  |
| Unigene20905  | Potri.011G119300.1 | 1.4491   | 4.3443   | -1.584  | Down | 1.62E-06  | 3.66E-06  |
| Unigene35451  | Potri.010G143000.1 | 1.8099   | 5.4259   | -1.584  | Down | 1.62E-06  | 3.66E-06  |
| Unigene13816  | Potri.005G246100.1 | 14.3061  | 42.89    | -1.584  | Down | 5.64E-81  | 9.36E-80  |
| Unigene22484  | Potri.014G077800.2 | 7.6409   | 22.9088  | -1.5841 | Down | 2.78E-35  | 1.94E-34  |
| Unigene523    | Potri.009G058100.1 | 13.3781  | 40.1107  | -1.5841 | Down | 3.66E-87  | 6.60E-86  |
| Unigene22516  | Potri.008G107300.1 | 6.176    | 18.5167  | -1.5841 | Down | 2.78E-35  | 1.94E-34  |
| Unigene17791  | Potri.018G037200.2 | 25.6501  | 76.9161  | -1.5843 | Down | 9.44E-55  | 1.02E-53  |
| Unigene77786  | Potri.012G068800.1 | 103.4142 | 310.0987 | -1.5843 | Down | 2.87E-144 | 9.73E-143 |
| Unigene30163  | Potri.003G224000.1 | 11.7479  | 35.228   | -1.5843 | Down | 3.32E-28  | 1.91E-27  |
| Unigene22893  | Potri.009G055200.1 | 2.551    | 7.6508   | -1.5845 | Down | 1.06E-09  | 2.97E-09  |
| Unigene91276  | Potri.004G172300.1 | 38.8349  | 116.469  | -1.5845 | Down | 1.05E-96  | 2.16E-95  |
| Unigene19106  | Potri.014G053500.1 | 5.9231   | 17.7643  | -1.5846 | Down | 1.06E-09  | 2.97E-09  |
| Unigene28494  | Potri.013G032100.1 | 1.845    | 5.5335   | -1.5846 | Down | 1.06E-09  | 2.97E-09  |
| Unigene47903  | Potri.004G208900.1 | 5.5425   | 16.6228  | -1.5846 | Down | 1.06E-09  | 2.97E-09  |
| Unigene21458  | Potri.002G184000.1 | 7.0996   | 21.2937  | -1.5846 | Down | 1.17E-89  | 2.18E-88  |

|               |                    |         |          |         |      |          |          |
|---------------|--------------------|---------|----------|---------|------|----------|----------|
| Unigene24037  | Potri.T061600.1    | 8.2508  | 24.7476  | -1.5847 | Down | 2.00E-76 | 3.11E-75 |
| Unigene48936  | Potri.006G080100.2 | 15.4765 | 46.4229  | -1.5848 | Down | 1.94E-32 | 1.26E-31 |
| Unigene63568  | Potri.005G041000.5 | 12.1312 | 36.389   | -1.5848 | Down | 5.18E-55 | 5.59E-54 |
| Unigene43766  | Potri.003G170600.1 | 8.8204  | 26.4589  | -1.5848 | Down | 1.52E-35 | 1.07E-34 |
| Unigene80484  | Potri.005G188400.1 | 64.2214 | 192.6621 | -1.5849 | Down | 4.17E-96 | 8.47E-95 |
| Unigene3115   | Potri.009G110200.1 | 2.8726  | 8.6179   | -1.585  | Down | 5.43E-16 | 2.06E-15 |
| Unigene12316  | Potri.009G064600.3 | 13.9448 | 41.8341  | -1.585  | Down | 3.93E-56 | 4.35E-55 |
| Unigene70721  | Potri.005G151500.1 | 12.062  | 36.1867  | -1.585  | Down | 5.43E-16 | 2.06E-15 |
| Unigene1421   | Potri.001G275200.2 | 3.624   | 10.8722  | -1.585  | Down | 5.43E-16 | 2.06E-15 |
| Unigene25098  | Potri.010G171100.1 | 7.4476  | 22.3472  | -1.5852 | Down | 1.82E-28 | 1.05E-27 |
| Unigene22372  | Potri.006G145800.1 | 13.6374 | 40.9216  | -1.5853 | Down | 2.16E-94 | 4.30E-93 |
| Unigene104006 | Potri.018G106400.1 | 1.4307  | 4.2938   | -1.5855 | Down | 1.89E-04 | 3.53E-04 |
| Unigene41871  | Potri.012G109600.1 | 8.2531  | 24.7693  | -1.5855 | Down | 8.32E-36 | 5.90E-35 |
| Unigene92098  | Potri.010G035900.1 | 1.1477  | 3.4444   | -1.5855 | Down | 1.89E-04 | 3.53E-04 |
| Unigene16814  | Potri.008G064900.1 | 8.5958  | 25.7979  | -1.5855 | Down | 5.45E-14 | 1.90E-13 |
| Unigene51651  | Potri.005G258600.2 | 1.9341  | 5.8045   | -1.5855 | Down | 1.89E-04 | 3.53E-04 |
| Unigene62500  | Potri.002G217000.1 | 2.0888  | 6.2689   | -1.5855 | Down | 1.89E-04 | 3.53E-04 |
| Unigene118945 | Potri.001G345200.2 | 2.9614  | 8.8878   | -1.5855 | Down | 7.63E-11 | 2.29E-10 |
| Unigene51962  | Potri.018G030300.1 | 31.0653 | 93.2342  | -1.5856 | Down | 8.38E-67 | 1.12E-65 |
| Unigene47004  | Potri.010G252800.5 | 19.4909 | 58.4967  | -1.5856 | Down | 4.34E-76 | 6.71E-75 |
| Unigene46609  | Potri.010G070000.2 | 1.9269  | 5.7831   | -1.5856 | Down | 1.89E-04 | 3.53E-04 |
| Unigene46374  | Potri.008G182700.3 | 4.8351  | 14.5113  | -1.5856 | Down | 1.13E-07 | 2.78E-07 |
| Unigene40782  | Potri.008G171300.1 | 1.6899  | 5.0719   | -1.5856 | Down | 1.89E-04 | 3.53E-04 |
| Unigene41949  | Potri.006G004900.1 | 4.1775  | 12.5378  | -1.5856 | Down | 1.13E-07 | 2.78E-07 |
| Unigene106978 | Potri.003G150100.1 | 1.0219  | 3.067    | -1.5856 | Down | 1.89E-04 | 3.53E-04 |
| Unigene114406 | Potri.003G093900.1 | 1.9412  | 5.8261   | -1.5856 | Down | 1.89E-04 | 3.53E-04 |
| Unigene61913  | Potri.001G273400.1 | 4.3228  | 12.9737  | -1.5856 | Down | 4.01E-17 | 1.60E-16 |
| Unigene4763   | Potri.010G015200.3 | 23.3122 | 69.9737  | -1.5857 | Down | 2.46E-49 | 2.36E-48 |
| Unigene1265   | Potri.009G034900.5 | 10.2421 | 30.7428  | -1.5857 | Down | 3.09E-46 | 2.79E-45 |
| Unigene10997  | Potri.006G165100.4 | 6.7108  | 20.143   | -1.5857 | Down | 2.46E-49 | 2.37E-48 |
| Unigene7895   | Potri.007G127900.1 | 8.9498  | 26.8645  | -1.5858 | Down | 4.95E-40 | 3.88E-39 |
| Unigene72379  | Potri.003G004100.1 | 28.7895 | 86.4177  | -1.5858 | Down | 6.28E-37 | 4.58E-36 |
| Unigene29346  | Potri.015G126800.1 | 11.4843 | 34.4747  | -1.5859 | Down | 1.32E-27 | 7.49E-27 |
| Unigene7676   | Potri.004G211400.1 | 6.6583  | 19.9881  | -1.5859 | Down | 1.72E-24 | 8.84E-24 |
| Unigene40251  | Potri.014G119100.1 | 7.41    | 22.2454  | -1.586  | Down | 2.25E-21 | 1.05E-20 |
| Unigene13617  | Potri.014G046000.1 | 6.1934  | 18.5932  | -1.586  | Down | 2.25E-21 | 1.05E-20 |
| Unigene79940  | Potri.008G089000.1 | 11.4182 | 34.2804  | -1.586  | Down | 2.97E-18 | 1.24E-17 |
| Unigene1724   | Potri.015G008500.1 | 3.6087  | 10.835   | -1.5861 | Down | 9.93E-29 | 5.82E-28 |
| Unigene43552  | Potri.010G161300.4 | 5.9679  | 17.9179  | -1.5861 | Down | 7.73E-32 | 4.94E-31 |

|               |                    |         |          |         |      |          |          |
|---------------|--------------------|---------|----------|---------|------|----------|----------|
| Unigene32167  | Potri.019G050700.1 | 8.5647  | 25.7163  | -1.5862 | Down | 3.59E-39 | 2.76E-38 |
| Unigene846    | Potri.016G128700.1 | 2.0153  | 6.0509   | -1.5862 | Down | 4.01E-15 | 1.47E-14 |
| Unigene6300   | Potri.008G068800.1 | 30.2126 | 90.7181  | -1.5862 | Down | 1.62E-73 | 2.41E-72 |
| Unigene44602  | Potri.005G001200.1 | 8.8018  | 26.4274  | -1.5862 | Down | 9.93E-29 | 5.82E-28 |
| Unigene25000  | Potri.015G038600.2 | 6.7426  | 20.2472  | -1.5863 | Down | 5.54E-12 | 1.76E-11 |
| Unigene7435   | Potri.014G180100.1 | 2.4015  | 7.2113   | -1.5863 | Down | 5.54E-12 | 1.76E-11 |
| Unigene44957  | Potri.009G068600.1 | 14.5689 | 43.7465  | -1.5863 | Down | 8.00E-81 | 1.33E-79 |
| Unigene118978 | Potri.004G041800.2 | 6.5049  | 19.5334  | -1.5863 | Down | 1.68E-22 | 8.09E-22 |
| Unigene38438  | Potri.001G371200.3 | 4.1249  | 12.3865  | -1.5863 | Down | 5.54E-12 | 1.76E-11 |
| Unigene24808  | Potri.015G017200.1 | 14.6318 | 43.9385  | -1.5864 | Down | 1.54E-71 | 2.22E-70 |
| Unigene3085   | Potri.001G069500.2 | 5.8218  | 17.4833  | -1.5864 | Down | 3.74E-86 | 6.67E-85 |
| Unigene17707  | Potri.017G007800.2 | 9.1627  | 27.5181  | -1.5865 | Down | 9.64E-27 | 5.32E-26 |
| Unigene115146 | Potri.013G002100.1 | 27.9417 | 83.9203  | -1.5866 | Down | 9.74E-49 | 9.26E-48 |
| Unigene16262  | Potri.009G014700.2 | 18.0921 | 54.3368  | -1.5866 | Down | 4.39E-34 | 2.97E-33 |
| Unigene20240  | Potri.015G094100.2 | 18.057  | 54.2353  | -1.5867 | Down | 1.23E-45 | 1.09E-44 |
| Unigene26249  | Potri.005G199600.4 | 8.8873  | 26.6934  | -1.5867 | Down | 2.96E-16 | 1.14E-15 |
| Unigene49483  | Potri.001G258000.1 | 28.6842 | 86.158   | -1.5867 | Down | 1.73E-64 | 2.22E-63 |
| Unigene40889  | Potri.001G201800.1 | 5.4464  | 16.3586  | -1.5867 | Down | 8.00E-09 | 2.13E-08 |
| Unigene7771   | Potri.014G180600.1 | 4.1474  | 12.458   | -1.5868 | Down | 3.31E-35 | 2.30E-34 |
| Unigene30300  | Potri.017G043100.1 | 29.3561 | 88.1842  | -1.5869 | Down | 1.96E-39 | 1.52E-38 |
| Unigene39582  | Potri.003G142100.1 | 6.5471  | 19.6687  | -1.587  | Down | 7.04E-48 | 6.59E-47 |
| Unigene18215  | Potri.019G006600.1 | 13.8411 | 41.5854  | -1.5871 | Down | 5.34E-49 | 5.10E-48 |
| Unigene12189  | Potri.005G099700.2 | 16.3657 | 49.1683  | -1.5871 | Down | 1.40E-83 | 2.41E-82 |
| Unigene118925 | Potri.007G017600.1 | 1.3551  | 4.0723   | -1.5874 | Down | 1.26E-05 | 2.65E-05 |
| Unigene42176  | Potri.019G080900.1 | 10.7786 | 32.3926  | -1.5875 | Down | 1.62E-18 | 6.83E-18 |
| Unigene112845 | Potri.018G070200.2 | 5.7384  | 17.2455  | -1.5875 | Down | 5.73E-10 | 1.63E-09 |
| Unigene100912 | Potri.018G035100.1 | 2.2714  | 6.8263   | -1.5875 | Down | 1.26E-05 | 2.65E-05 |
| Unigene20453  | Potri.008G213200.2 | 20.1437 | 60.5374  | -1.5875 | Down | 3.86E-48 | 3.63E-47 |
| Unigene14453  | Potri.008G157700.1 | 2.3702  | 7.1231   | -1.5875 | Down | 5.73E-10 | 1.63E-09 |
| Unigene13936  | Potri.007G123900.1 | 2.5456  | 7.6502   | -1.5875 | Down | 9.16E-23 | 4.46E-22 |
| Unigene5729   | Potri.006G219500.2 | 15.3646 | 46.1749  | -1.5875 | Down | 1.81E-35 | 1.27E-34 |
| Unigene17510  | Potri.003G067800.2 | 13.5419 | 40.6971  | -1.5875 | Down | 5.27E-27 | 2.93E-26 |
| Unigene24892  | Potri.002G263000.1 | 2.257   | 6.7829   | -1.5875 | Down | 1.26E-05 | 2.65E-05 |
| Unigene117325 | Potri.002G021900.1 | 3.9814  | 11.9653  | -1.5875 | Down | 5.73E-10 | 1.63E-09 |
| Unigene106533 | Potri.001G233200.1 | 1.9796  | 5.9492   | -1.5875 | Down | 1.26E-05 | 2.65E-05 |
| Unigene15612  | Potri.002G088400.2 | 36.8692 | 110.8184 | -1.5877 | Down | 8.12E-59 | 9.45E-58 |
| Unigene49991  | Potri.002G009400.1 | 8.7273  | 26.2312  | -1.5877 | Down | 1.37E-36 | 9.88E-36 |
| Unigene54304  | Potri.008G012600.4 | 10.3115 | 30.9961  | -1.5878 | Down | 1.21E-19 | 5.30E-19 |
| Unigene48458  | Potri.007G014600.1 | 17.4297 | 52.391   | -1.5878 | Down | 6.85E-24 | 3.46E-23 |

|               |                    |         |          |         |      |           |           |
|---------------|--------------------|---------|----------|---------|------|-----------|-----------|
| Unigene36182  | Potri.006G076900.1 | 17.3486 | 52.1473  | -1.5878 | Down | 6.85E-24  | 3.46E-23  |
| Unigene21603  | Potri.014G114300.1 | 7.9737  | 23.9701  | -1.5879 | Down | 8.08E-75  | 1.23E-73  |
| Unigene10674  | Potri.012G066300.4 | 11.2808 | 33.9124  | -1.5879 | Down | 2.71E-194 | 1.36E-192 |
| Unigene78066  | Potri.006G197700.2 | 60.0937 | 180.6617 | -1.588  | Down | 1.76E-85  | 3.11E-84  |
| Unigene7276   | Potri.005G094300.1 | 17.3862 | 52.2734  | -1.5881 | Down | 5.89E-40  | 4.62E-39  |
| Unigene112934 | Potri.002G254700.9 | 6.4673  | 19.4445  | -1.5881 | Down | 4.14E-11  | 1.26E-10  |
| Unigene115228 | Potri.001G233000.2 | 30.6249 | 92.0735  | -1.5881 | Down | 9.68E-54  | 1.02E-52  |
| Unigene65689  | Potri.001G171300.1 | 1.9801  | 5.9534   | -1.5881 | Down | 4.14E-11  | 1.26E-10  |
| Unigene3743   | Potri.006G216200.1 | 24.6984 | 74.2612  | -1.5882 | Down | 2.67E-45  | 2.36E-44  |
| Unigene3546   | Potri.001G215700.2 | 21.4226 | 64.4109  | -1.5882 | Down | 2.06E-64  | 2.64E-63  |
| Unigene956    | Potri.010G023900.1 | 3.0001  | 9.0212   | -1.5883 | Down | 1.61E-16  | 6.27E-16  |
| Unigene1235   | Potri.005G094200.1 | 3.6245  | 10.8987  | -1.5883 | Down | 1.68E-31  | 1.07E-30  |
| Unigene5527   | Potri.003G081000.2 | 26.9604 | 81.0754  | -1.5884 | Down | 1.53E-47  | 1.42E-46  |
| Unigene66301  | Potri.018G143600.2 | 1.9047  | 5.7285   | -1.5886 | Down | 8.68E-07  | 2.01E-06  |
| Unigene20859  | Potri.015G054700.4 | 3.5951  | 10.8129  | -1.5886 | Down | 8.68E-07  | 2.01E-06  |
| Unigene51598  | Potri.013G088600.1 | 4.0506  | 12.1828  | -1.5886 | Down | 8.68E-07  | 2.01E-06  |
| Unigene46196  | Potri.012G090600.2 | 6.9127  | 20.7908  | -1.5886 | Down | 3.01E-12  | 9.67E-12  |
| Unigene38153  | Potri.011G070900.2 | 14.8844 | 44.7669  | -1.5886 | Down | 4.27E-39  | 3.28E-38  |
| Unigene1508   | Potri.010G216100.3 | 24.7384 | 74.4017  | -1.5886 | Down | 5.47E-102 | 1.20E-100 |
| Unigene40331  | Potri.008G124000.1 | 1.4187  | 4.2669   | -1.5886 | Down | 8.68E-07  | 2.01E-06  |
| Unigene39994  | Potri.006G280800.1 | 3.2317  | 9.7199   | -1.5886 | Down | 3.01E-12  | 9.67E-12  |
| Unigene1196   | Potri.006G123300.1 | 4.0197  | 12.0898  | -1.5886 | Down | 4.03E-55  | 4.36E-54  |
| Unigene8962   | Potri.009G096600.1 | 3.5105  | 10.5585  | -1.5887 | Down | 8.68E-07  | 2.01E-06  |
| Unigene31358  | Potri.017G110600.1 | 19.4362 | 58.4622  | -1.5888 | Down | 3.23E-40  | 2.54E-39  |
| Unigene12301  | Potri.010G167000.4 | 39.3207 | 118.2791 | -1.5888 | Down | 6.39E-97  | 1.31E-95  |
| Unigene73924  | Potri.010G022300.2 | 17.6866 | 53.2029  | -1.5888 | Down | 3.74E-24  | 1.91E-23  |
| Unigene10552  | Potri.010G166100.6 | 20.5148 | 61.713   | -1.5889 | Down | 5.43E-36  | 3.87E-35  |
| Unigene7887   | Potri.005G101300.2 | 5.8975  | 17.7409  | -1.5889 | Down | 5.43E-36  | 3.87E-35  |
| Unigene34079  | Potri.001G127300.1 | 7.8186  | 23.5194  | -1.5889 | Down | 8.14E-64  | 1.04E-62  |
| Unigene39555  | Potri.007G044200.1 | 6.7195  | 20.2155  | -1.589  | Down | 1.02E-60  | 1.22E-59  |
| Unigene72054  | Potri.001G389200.1 | 9.6433  | 29.0118  | -1.589  | Down | 2.20E-13  | 7.47E-13  |
| Unigene86941  | Potri.016G002100.1 | 26.2792 | 79.0657  | -1.5891 | Down | 4.82E-50  | 4.71E-49  |
| Unigene42856  | Potri.010G113700.1 | 7.1627  | 21.5492  | -1.5891 | Down | 5.89E-79  | 9.51E-78  |
| Unigene42681  | Potri.009G134100.3 | 5.2292  | 15.7325  | -1.5891 | Down | 1.40E-43  | 1.19E-42  |
| Unigene32513  | Potri.001G206700.1 | 4.4594  | 13.4179  | -1.5892 | Down | 6.94E-33  | 4.56E-32  |
| Unigene42447  | Potri.016G123800.2 | 8.088   | 24.3384  | -1.5894 | Down | 4.19E-150 | 1.50E-148 |
| Unigene92078  | Potri.014G107000.1 | 2.3826  | 7.1696   | -1.5894 | Down | 6.09E-08  | 1.53E-07  |
| Unigene39152  | Potri.009G067200.1 | 29.5902 | 89.0426  | -1.5894 | Down | 7.34E-60  | 8.71E-59  |
| Unigene27647  | Potri.009G024600.4 | 6.3442  | 19.0909  | -1.5894 | Down | 1.61E-14  | 5.76E-14  |



|               |                    |         |          |         |      |           |           |
|---------------|--------------------|---------|----------|---------|------|-----------|-----------|
| Unigene87312  | Potri.006G025900.1 | 6.8897  | 20.7325  | -1.5894 | Down | 1.61E-14  | 5.76E-14  |
| Unigene9662   | Potri.001G367400.3 | 3.8632  | 11.625   | -1.5894 | Down | 6.09E-08  | 1.53E-07  |
| Unigene50678  | Potri.009G032700.1 | 9.7478  | 29.3361  | -1.5895 | Down | 1.18E-28  | 6.91E-28  |
| Unigene63146  | Potri.008G042300.5 | 8.4835  | 25.5312  | -1.5895 | Down | 1.18E-28  | 6.91E-28  |
| Unigene76664  | Potri.014G058800.1 | 15.117  | 45.496   | -1.5896 | Down | 3.66E-22  | 1.75E-21  |
| Unigene43068  | Potri.010G033000.1 | 4.5152  | 13.5889  | -1.5896 | Down | 3.66E-22  | 1.75E-21  |
| Unigene2138   | Potri.002G252800.1 | 7.8591  | 23.6542  | -1.5897 | Down | 8.90E-30  | 5.37E-29  |
| Unigene45531  | Potri.008G078500.2 | 7.1897  | 21.6418  | -1.5898 | Down | 2.89E-75  | 4.42E-74  |
| Unigene103507 | Potri.008G148100.2 | 1.9391  | 5.8373   | -1.5899 | Down | 4.33E-09  | 1.17E-08  |
| Unigene45200  | Potri.002G011800.1 | 2.0858  | 6.2789   | -1.5899 | Down | 4.33E-09  | 1.17E-08  |
| Unigene11793  | Potri.001G030100.1 | 5.7996  | 17.4585  | -1.5899 | Down | 2.05E-24  | 1.05E-23  |
| Unigene25219  | Potri.001G402500.1 | 27.7424 | 83.5166  | -1.59   | Down | 2.52E-48  | 2.38E-47  |
| Unigene53129  | Potri.003G098200.2 | 11.9424 | 35.9552  | -1.5901 | Down | 6.51E-18  | 2.68E-17  |
| Unigene7587   | Potri.010G146400.2 | 6.4668  | 19.4705  | -1.5902 | Down | 1.15E-26  | 6.33E-26  |
| Unigene1094   | Potri.001G379800.1 | 11.3325 | 34.121   | -1.5902 | Down | 1.08E-102 | 2.37E-101 |
| Unigene102702 | Potri.017G009200.1 | 4.1562  | 12.5148  | -1.5903 | Down | 3.11E-10  | 8.98E-10  |
| Unigene13508  | Potri.005G257600.1 | 3.2148  | 9.68     | -1.5903 | Down | 4.83E-19  | 2.08E-18  |
| Unigene8897   | Potri.001G454200.1 | 2.0374  | 6.1347   | -1.5903 | Down | 3.11E-10  | 8.98E-10  |
| Unigene28148  | Potri.006G127100.2 | 25.2808 | 76.1286  | -1.5904 | Down | 3.64E-56  | 4.03E-55  |
| Unigene9831   | Potri.005G247400.1 | 8.0204  | 24.1528  | -1.5904 | Down | 3.59E-20  | 1.61E-19  |
| Unigene17159  | Potri.001G091300.2 | 31.88   | 95.998   | -1.5904 | Down | 2.41E-46  | 2.18E-45  |
| Unigene98811  | Potri.005G123700.1 | 21.1475 | 63.6864  | -1.5905 | Down | 4.87E-30  | 2.96E-29  |
| Unigene39190  | Potri.002G099100.1 | 6.3116  | 19.0071  | -1.5905 | Down | 9.29E-39  | 7.07E-38  |
| Unigene36027  | Potri.001G201800.5 | 8.0837  | 24.3443  | -1.5905 | Down | 4.87E-30  | 2.96E-29  |
| Unigene4794   | Potri.009G121400.1 | 20.3873 | 61.401   | -1.5906 | Down | 5.31E-41  | 4.27E-40  |
| Unigene18541  | Potri.002G226200.1 | 3.9076  | 11.7685  | -1.5906 | Down | 2.68E-21  | 1.24E-20  |
| Unigene50468  | Potri.001G458200.2 | 2.4829  | 7.4777   | -1.5906 | Down | 2.25E-11  | 6.92E-11  |
| Unigene77628  | Potri.004G164500.1 | 29.9039 | 90.0703  | -1.5907 | Down | 3.04E-43  | 2.57E-42  |
| Unigene53381  | Potri.001G376400.6 | 8.162   | 24.5839  | -1.5907 | Down | 2.00E-22  | 9.62E-22  |
| Unigene89566  | Potri.010G138300.3 | 5.1052  | 15.3781  | -1.5908 | Down | 1.64E-12  | 5.33E-12  |
| Unigene25211  | Potri.008G025800.6 | 11.0928 | 33.413   | -1.5908 | Down | 2.63E-55  | 2.86E-54  |
| Unigene668    | Potri.019G018000.1 | 62.3566 | 187.8597 | -1.591  | Down | 2.49E-123 | 6.94E-122 |
| Unigene46646  | Potri.017G090300.4 | 39.1472 | 117.943  | -1.5911 | Down | 2.00E-77  | 3.15E-76  |
| Unigene26655  | Potri.006G241300.2 | 20.0485 | 60.4034  | -1.5911 | Down | 3.85E-40  | 3.03E-39  |
| Unigene46207  | Potri.010G207200.3 | 10.5295 | 31.7252  | -1.5912 | Down | 8.79E-15  | 3.17E-14  |
| Unigene22969  | Potri.T150600.1    | 2.6204  | 7.8959   | -1.5913 | Down | 6.48E-16  | 2.46E-15  |
| Unigene49278  | Potri.010G002900.4 | 4.4787  | 13.4956  | -1.5913 | Down | 6.48E-16  | 2.46E-15  |
| Unigene78140  | Potri.018G127200.2 | 42.2199 | 127.2247 | -1.5914 | Down | 3.64E-61  | 4.42E-60  |
| Unigene27395  | Potri.001G032400.1 | 8.2755  | 24.9381  | -1.5914 | Down | 4.79E-17  | 1.90E-16  |

|               |                    |         |          |         |      |           |           |
|---------------|--------------------|---------|----------|---------|------|-----------|-----------|
| Unigene680    | Potri.004G106500.5 | 5.2964  | 15.961   | -1.5915 | Down | 4.15E-49  | 3.98E-48  |
| Unigene75838  | Potri.001G390200.2 | 52.0187 | 156.7764 | -1.5916 | Down | 3.09E-71  | 4.43E-70  |
| Unigene32111  | Potri.009G074300.1 | 7.6109  | 22.9397  | -1.5917 | Down | 4.56E-58  | 5.23E-57  |
| Unigene30652  | Potri.006G275400.6 | 14.4385 | 43.5185  | -1.5917 | Down | 1.96E-20  | 8.87E-20  |
| Unigene37661  | Potri.014G070600.1 | 7.28    | 21.9432  | -1.5918 | Down | 1.46E-21  | 6.86E-21  |
| Unigene89729  | Potri.018G027800.8 | 21.3727 | 64.4292  | -1.5919 | Down | 3.00E-48  | 2.83E-47  |
| Unigene39684  | Potri.001G371600.1 | 14.6246 | 44.0881  | -1.592  | Down | 7.47E-75  | 1.13E-73  |
| Unigene5266   | Potri.008G145100.2 | 9.7983  | 29.5401  | -1.5921 | Down | 2.58E-28  | 1.49E-27  |
| Unigene32655  | Potri.005G204900.3 | 4.2162  | 12.7113  | -1.5921 | Down | 1.94E-29  | 1.16E-28  |
| Unigene47859  | Potri.005G170800.2 | 13.3694 | 40.3062  | -1.5921 | Down | 2.58E-28  | 1.49E-27  |
| Unigene8748   | Potri.001G234800.1 | 17.2041 | 51.867   | -1.5921 | Down | 2.58E-28  | 1.49E-27  |
| Unigene38738  | Potri.017G101100.2 | 5.4915  | 16.5581  | -1.5923 | Down | 3.54E-36  | 2.53E-35  |
| Unigene31782  | Potri.008G133300.1 | 9.9012  | 29.8554  | -1.5923 | Down | 0         | 0         |
| Unigene115674 | Potri.018G003100.1 | 25.0764 | 75.6188  | -1.5924 | Down | 2.86E-46  | 2.59E-45  |
| Unigene36971  | Potri.011G070900.2 | 24.5455 | 74.0186  | -1.5924 | Down | 2.17E-47  | 2.01E-46  |
| Unigene39948  | Potri.010G119500.1 | 24.4952 | 73.8728  | -1.5925 | Down | 7.90E-61  | 9.53E-60  |
| Unigene29976  | Potri.017G058300.2 | 33.1651 | 100.0273 | -1.5927 | Down | 2.54E-84  | 4.43E-83  |
| Unigene34579  | Potri.001G315800.1 | 34.1222 | 102.9188 | -1.5927 | Down | 2.89E-112 | 7.15E-111 |
| Unigene72168  | Potri.018G127200.2 | 26.2545 | 79.2     | -1.5929 | Down | 3.41E-34  | 2.32E-33  |
| Unigene43544  | Potri.018G085100.2 | 5.5553  | 16.7581  | -1.5929 | Down | 2.61E-17  | 1.05E-16  |
| Unigene7144   | Potri.015G054600.1 | 5.0576  | 15.2568  | -1.5929 | Down | 1.68E-10  | 4.94E-10  |
| Unigene102443 | Potri.015G049900.1 | 2.1749  | 6.5608   | -1.5929 | Down | 6.76E-06  | 1.45E-05  |
| Unigene13280  | Potri.015G038500.1 | 3.7702  | 11.3732  | -1.5929 | Down | 1.94E-18  | 8.14E-18  |
| Unigene38544  | Potri.014G133700.1 | 3.4325  | 10.3545  | -1.5929 | Down | 1.22E-11  | 3.80E-11  |
| Unigene554    | Potri.014G081100.2 | 40.9671 | 123.5821 | -1.5929 | Down | 3.13E-119 | 8.37E-118 |
| Unigene118550 | Potri.014G044500.1 | 1.2351  | 3.7258   | -1.5929 | Down | 1.01E-04  | 1.93E-04  |
| Unigene37590  | Potri.013G024200.4 | 5.5032  | 16.6011  | -1.5929 | Down | 1.22E-11  | 3.80E-11  |
| Unigene21147  | Potri.012G074800.1 | 8.9584  | 27.0241  | -1.5929 | Down | 6.51E-14  | 2.26E-13  |
| Unigene32760  | Potri.011G168100.1 | 6.5623  | 19.7961  | -1.5929 | Down | 1.94E-36  | 1.40E-35  |
| Unigene106552 | Potri.010G216600.1 | 2.4158  | 7.2875   | -1.5929 | Down | 4.67E-07  | 1.10E-06  |
| Unigene104546 | Potri.010G060800.1 | 1.2687  | 3.8272   | -1.5929 | Down | 1.01E-04  | 1.93E-04  |
| Unigene38132  | Potri.009G101800.1 | 4.0107  | 12.0988  | -1.5929 | Down | 8.89E-13  | 2.93E-12  |
| Unigene46211  | Potri.008G066900.1 | 4.0207  | 12.1289  | -1.5929 | Down | 3.53E-16  | 1.35E-15  |
| Unigene18794  | Potri.007G076700.4 | 2.6329  | 7.9425   | -1.5929 | Down | 3.28E-08  | 8.42E-08  |
| Unigene7115   | Potri.006G263400.1 | 12.1714 | 36.7166  | -1.5929 | Down | 1.94E-36  | 1.40E-35  |
| Unigene38929  | Potri.006G075300.2 | 2.0676  | 6.2372   | -1.5929 | Down | 4.67E-07  | 1.10E-06  |
| Unigene24544  | Potri.006G020700.6 | 14.346  | 43.2764  | -1.5929 | Down | 7.99E-22  | 3.78E-21  |
| Unigene41164  | Potri.005G161100.1 | 2.9447  | 8.883    | -1.5929 | Down | 3.28E-08  | 8.42E-08  |
| Unigene82080  | Potri.005G131200.1 | 11.5211 | 34.7548  | -1.5929 | Down | 1.44E-19  | 6.31E-19  |

|               |                    |         |          |         |      |           |           |
|---------------|--------------------|---------|----------|---------|------|-----------|-----------|
| Unigene61054  | Potri.005G002800.2 | 5.3116  | 16.0232  | -1.5929 | Down | 1.22E-11  | 3.80E-11  |
| Unigene40066  | Potri.004G214400.2 | 4.7549  | 14.3437  | -1.5929 | Down | 7.99E-22  | 3.78E-21  |
| Unigene23789  | Potri.004G132900.1 | 6.1857  | 18.6598  | -1.5929 | Down | 1.57E-46  | 1.42E-45  |
| Unigene13660  | Potri.003G196500.1 | 3.9057  | 11.782   | -1.5929 | Down | 1.68E-10  | 4.94E-10  |
| Unigene30524  | Potri.003G064100.2 | 17.5797 | 53.0313  | -1.5929 | Down | 1.88E-27  | 1.06E-26  |
| Unigene8931   | Potri.002G162000.1 | 7.2977  | 22.0145  | -1.5929 | Down | 1.22E-11  | 3.80E-11  |
| Unigene51281  | Potri.002G113800.1 | 2.3987  | 7.2359   | -1.5929 | Down | 6.76E-06  | 1.45E-05  |
| Unigene110743 | Potri.001G378000.2 | 19.8051 | 59.7444  | -1.5929 | Down | 1.41E-28  | 8.22E-28  |
| Unigene7284   | Potri.001G333800.1 | 3.1687  | 9.5586   | -1.5929 | Down | 2.34E-09  | 6.44E-09  |
| Unigene53037  | Potri.001G123500.1 | 11.0245 | 33.2567  | -1.5929 | Down | 4.79E-15  | 1.75E-14  |
| Unigene95578  | Potri.005G042000.1 | 1.6862  | 5.0867   | -1.593  | Down | 4.67E-07  | 1.10E-06  |
| Unigene22529  | Potri.003G107500.1 | 1.2658  | 3.8185   | -1.593  | Down | 1.01E-04  | 1.93E-04  |
| Unigene45684  | Potri.010G185800.3 | 12.5652 | 37.91    | -1.5931 | Down | 2.57E-108 | 6.07E-107 |
| Unigene85035  | Potri.006G229300.9 | 40.189  | 121.2631 | -1.5933 | Down | 2.65E-70  | 3.75E-69  |
| Unigene8190   | Potri.005G032800.1 | 19.2904 | 58.2072  | -1.5933 | Down | 1.81E-62  | 2.24E-61  |
| Unigene39570  | Potri.006G093900.2 | 4.8965  | 14.7752  | -1.5934 | Down | 5.42E-58  | 6.21E-57  |
| Unigene7971   | Potri.001G132400.2 | 6.5561  | 19.784   | -1.5934 | Down | 6.52E-48  | 6.10E-47  |
| Unigene712    | Potri.011G156100.3 | 8.1635  | 24.6359  | -1.5935 | Down | 2.62E-42  | 2.17E-41  |
| Unigene41800  | Potri.006G257400.1 | 19.0383 | 57.4523  | -1.5935 | Down | 1.14E-45  | 1.01E-44  |
| Unigene34164  | Potri.004G177700.1 | 17.8389 | 53.8351  | -1.5935 | Down | 1.25E-80  | 2.06E-79  |
| Unigene13118  | Potri.003G133900.3 | 3.7081  | 11.1919  | -1.5937 | Down | 3.29E-32  | 2.12E-31  |
| Unigene2480   | Potri.008G011300.1 | 25.0101 | 75.4924  | -1.5938 | Down | 8.95E-54  | 9.44E-53  |
| Unigene44917  | Potri.004G078700.1 | 7.9041  | 23.8578  | -1.5938 | Down | 5.16E-56  | 5.69E-55  |
| Unigene44668  | Potri.011G147400.2 | 9.9216  | 29.9498  | -1.5939 | Down | 2.71E-49  | 2.60E-48  |
| Unigene767    | Potri.015G112700.1 | 19.3938 | 58.5452  | -1.594  | Down | 2.48E-92  | 4.78E-91  |
| Unigene45320  | Potri.008G072700.2 | 7.6194  | 23.0039  | -1.5941 | Down | 1.24E-59  | 1.46E-58  |
| Unigene26386  | Potri.005G162300.1 | 29.3146 | 88.5017  | -1.5941 | Down | 7.15E-62  | 8.77E-61  |
| Unigene112138 | Potri.019G025600.3 | 24.5022 | 73.9811  | -1.5942 | Down | 5.82E-37  | 4.24E-36  |
| Unigene28902  | Potri.006G076400.1 | 5.6905  | 17.1839  | -1.5944 | Down | 1.80E-32  | 1.17E-31  |
| Unigene86402  | Potri.015G140500.2 | 15.1181 | 45.6589  | -1.5946 | Down | 4.22E-29  | 2.50E-28  |
| Unigene94554  | Potri.001G197400.1 | 7.2692  | 21.9542  | -1.5946 | Down | 2.61E-15  | 9.62E-15  |
| Unigene51622  | Potri.013G085300.1 | 41.4439 | 125.1695 | -1.5947 | Down | 4.15E-69  | 5.75E-68  |
| Unigene22267  | Potri.010G178400.1 | 6.4514  | 19.4856  | -1.5947 | Down | 3.55E-53  | 3.70E-52  |
| Unigene27037  | Potri.003G127100.1 | 18.9741 | 57.3076  | -1.5947 | Down | 5.62E-28  | 3.22E-27  |
| Unigene66241  | Potri.004G157400.1 | 3.8326  | 11.5763  | -1.5948 | Down | 3.54E-14  | 1.25E-13  |
| Unigene44810  | Potri.001G177000.4 | 41.123  | 124.2171 | -1.5948 | Down | 2.11E-110 | 5.13E-109 |
| Unigene7071   | Potri.002G197500.1 | 2.5364  | 7.662    | -1.5949 | Down | 4.83E-13  | 1.61E-12  |
| Unigene40680  | Potri.015G103700.1 | 6.1562  | 18.597   | -1.595  | Down | 4.83E-13  | 1.61E-12  |
| Unigene20499  | Potri.006G127100.1 | 20.3622 | 61.5189  | -1.5951 | Down | 3.18E-75  | 4.86E-74  |

|               |                    |         |          |         |      |           |           |
|---------------|--------------------|---------|----------|---------|------|-----------|-----------|
| Unigene60611  | Potri.007G026900.1 | 9.2996  | 28.097   | -1.5952 | Down | 2.38E-22  | 1.14E-21  |
| Unigene24164  | Potri.004G102800.1 | 2.656   | 8.0246   | -1.5952 | Down | 6.62E-12  | 2.09E-11  |
| Unigene71159  | Potri.003G161900.2 | 25.4819 | 76.9885  | -1.5952 | Down | 9.84E-33  | 6.45E-32  |
| Unigene38991  | Potri.002G061900.3 | 11.0695 | 33.4445  | -1.5952 | Down | 2.38E-22  | 1.14E-21  |
| Unigene39712  | Potri.006G051300.1 | 6.1288  | 18.5192  | -1.5953 | Down | 1.74E-30  | 1.07E-29  |
| Unigene12643  | Potri.018G147400.4 | 5.9046  | 17.8429  | -1.5954 | Down | 4.29E-20  | 1.91E-19  |
| Unigene16809  | Potri.014G142700.1 | 6.1417  | 18.5594  | -1.5954 | Down | 9.13E-11  | 2.72E-10  |
| Unigene12019  | Potri.012G114200.1 | 65.0237 | 196.4877 | -1.5954 | Down | 7.32E-264 | 5.42E-262 |
| Unigene42696  | Potri.006G189900.1 | 10.7517 | 32.4893  | -1.5954 | Down | 2.16E-67  | 2.91E-66  |
| Unigene52520  | Potri.003G038900.1 | 9.9304  | 30.0084  | -1.5954 | Down | 1.32E-38  | 9.99E-38  |
| Unigene29412  | Potri.014G086900.1 | 1.7886  | 5.405    | -1.5955 | Down | 9.13E-11  | 2.72E-10  |
| Unigene32021  | Potri.005G107600.2 | 15.0012 | 45.335   | -1.5955 | Down | 2.61E-134 | 8.11E-133 |
| Unigene837    | Potri.005G039500.4 | 2.1181  | 6.4007   | -1.5955 | Down | 9.13E-11  | 2.72E-10  |
| Unigene13229  | Potri.004G072500.1 | 8.6191  | 26.046   | -1.5955 | Down | 2.84E-66  | 3.77E-65  |
| Unigene32477  | Potri.001G456500.1 | 12.6448 | 38.2156  | -1.5956 | Down | 1.12E-113 | 2.81E-112 |
| Unigene43054  | Potri.002G174100.1 | 10.9666 | 33.145   | -1.5957 | Down | 5.55E-78  | 8.82E-77  |
| Unigene40210  | Potri.011G028400.4 | 24.7301 | 74.7555  | -1.5959 | Down | 1.38E-110 | 3.36E-109 |
| Unigene87821  | Potri.015G076100.3 | 45.9873 | 139.0258 | -1.596  | Down | 4.59E-91  | 8.73E-90  |
| Unigene7907   | Potri.006G040500.1 | 5.5553  | 16.7947  | -1.5961 | Down | 9.73E-24  | 4.89E-23  |
| Unigene73097  | Potri.001G197900.2 | 51.5769 | 155.934  | -1.5961 | Down | 8.53E-67  | 1.14E-65  |
| Unigene29457  | Potri.014G068800.1 | 2.0465  | 6.1878   | -1.5963 | Down | 1.42E-15  | 5.30E-15  |
| Unigene38180  | Potri.009G115800.3 | 69.0229 | 208.7006 | -1.5963 | Down | 0         | 0         |
| Unigene36565  | Potri.006G155000.1 | 3.9285  | 11.8781  | -1.5963 | Down | 1.30E-22  | 6.31E-22  |
| Unigene7542   | Potri.016G117600.1 | 12.5897 | 38.0702  | -1.5964 | Down | 3.56E-68  | 4.86E-67  |
| Unigene51205  | Potri.014G149600.1 | 16.7013 | 50.5014  | -1.5964 | Down | 1.68E-35  | 1.18E-34  |
| Unigene25160  | Potri.002G072300.1 | 9.4044  | 28.438   | -1.5964 | Down | 2.33E-48  | 2.20E-47  |
| Unigene12557  | Potri.014G172200.1 | 15.4436 | 46.7044  | -1.5965 | Down | 2.99E-40  | 2.35E-39  |
| Unigene11031  | Potri.012G088600.1 | 13.5458 | 40.9726  | -1.5968 | Down | 6.18E-127 | 1.78E-125 |
| Unigene33077  | Potri.014G106500.2 | 2.0246  | 6.1243   | -1.5969 | Down | 2.63E-13  | 8.89E-13  |
| Unigene30497  | Potri.007G019800.1 | 3.6322  | 10.987   | -1.5969 | Down | 2.51E-07  | 6.06E-07  |
| Unigene33524  | Potri.005G227100.1 | 10.2623 | 31.0425  | -1.5969 | Down | 3.98E-25  | 2.09E-24  |
| Unigene49154  | Potri.003G071500.1 | 2.0503  | 6.2019   | -1.5969 | Down | 2.51E-07  | 6.05E-07  |
| Unigene16411  | Potri.003G060600.3 | 18.4722 | 55.8766  | -1.5969 | Down | 3.98E-25  | 2.09E-24  |
| Unigene28658  | Potri.001G035300.1 | 1.4806  | 4.4787   | -1.5969 | Down | 2.51E-07  | 6.06E-07  |
| Unigene6659   | Potri.014G115600.1 | 7.0069  | 21.1983  | -1.5971 | Down | 5.32E-24  | 2.70E-23  |
| Unigene48257  | Potri.014G043700.1 | 21.3558 | 64.6115  | -1.5972 | Down | 1.22E-34  | 8.34E-34  |
| Unigene103321 | Potri.014G049000.3 | 1.95    | 5.9004   | -1.5973 | Down | 3.60E-12  | 1.15E-11  |
| Unigene90822  | Potri.011G167300.1 | 86.7805 | 262.5773 | -1.5973 | Down | 1.12E-208 | 6.10E-207 |
| Unigene92323  | Potri.003G126700.1 | 14.9836 | 45.3372  | -1.5973 | Down | 3.88E-44  | 3.33E-43  |

|               |                    |         |          |         |      |           |           |
|---------------|--------------------|---------|----------|---------|------|-----------|-----------|
| Unigene18472  | Potri.012G009200.1 | 3.9755  | 12.0304  | -1.5975 | Down | 5.71E-17  | 2.27E-16  |
| Unigene28324  | Potri.010G062300.1 | 8.7461  | 26.4668  | -1.5975 | Down | 5.71E-17  | 2.27E-16  |
| Unigene50716  | Potri.018G016200.1 | 7.0064  | 21.2039  | -1.5976 | Down | 8.88E-87  | 1.60E-85  |
| Unigene562    | Potri.005G040300.1 | 4.1727  | 12.6287  | -1.5977 | Down | 2.84E-31  | 1.79E-30  |
| Unigene62428  | Potri.T136400.1    | 7.6048  | 23.0187  | -1.5978 | Down | 4.95E-11  | 1.50E-10  |
| Unigene32170  | Potri.019G054200.3 | 9.9724  | 30.1854  | -1.5978 | Down | 6.95E-54  | 7.34E-53  |
| Unigene21251  | Potri.016G110500.1 | 12.4213 | 37.5969  | -1.5978 | Down | 4.21E-159 | 1.63E-157 |
| Unigene3188   | Potri.015G055400.1 | 5.4395  | 16.4648  | -1.5978 | Down | 7.73E-16  | 2.92E-15  |
| Unigene9162   | Potri.014G128600.7 | 2.8957  | 8.765    | -1.5978 | Down | 4.95E-11  | 1.50E-10  |
| Unigene16978  | Potri.013G068100.1 | 4.6212  | 13.9878  | -1.5978 | Down | 4.95E-11  | 1.50E-10  |
| Unigene19794  | Potri.013G007100.1 | 2.7975  | 8.4676   | -1.5978 | Down | 3.62E-06  | 7.97E-06  |
| Unigene37251  | Potri.010G159100.2 | 10.9169 | 33.0443  | -1.5978 | Down | 1.28E-20  | 5.81E-20  |
| Unigene43533  | Potri.001G097800.1 | 8.4942  | 25.7111  | -1.5978 | Down | 4.23E-68  | 5.77E-67  |
| Unigene59468  | Potri.001G086300.1 | 6.5274  | 19.7577  | -1.5978 | Down | 4.95E-11  | 1.50E-10  |
| Unigene28280  | Potri.006G022200.1 | 2.1227  | 6.4253   | -1.5979 | Down | 3.62E-06  | 7.97E-06  |
| Unigene35285  | Potri.003G096700.1 | 27.353  | 82.8059  | -1.598  | Down | 2.19E-56  | 2.44E-55  |
| Unigene29702  | Potri.011G126800.1 | 20.0535 | 60.7099  | -1.5981 | Down | 1.76E-69  | 2.46E-68  |
| Unigene17460  | Potri.014G114000.3 | 6.6978  | 20.2792  | -1.5982 | Down | 1.05E-14  | 3.78E-14  |
| Unigene2657   | Potri.010G221500.2 | 16.0167 | 48.4994  | -1.5984 | Down | 1.09E-150 | 3.93E-149 |
| Unigene34023  | Potri.007G027000.3 | 4.2449  | 12.8539  | -1.5984 | Down | 6.49E-40  | 5.07E-39  |
| Unigene17264  | Potri.009G115500.1 | 9.4097  | 28.495   | -1.5985 | Down | 8.91E-27  | 4.93E-26  |
| Unigene41432  | Potri.009G008700.1 | 6.5407  | 19.8069  | -1.5985 | Down | 2.31E-18  | 9.67E-18  |
| Unigene109956 | Potri.006G275600.1 | 6.3018  | 19.0834  | -1.5985 | Down | 6.86E-10  | 1.95E-09  |
| Unigene39808  | Potri.013G161700.5 | 17.0063 | 51.5017  | -1.5986 | Down | 1.58E-55  | 1.73E-54  |
| Unigene79062  | Potri.006G149400.1 | 13.9873 | 42.3619  | -1.5986 | Down | 5.20E-22  | 2.47E-21  |
| Unigene29799  | Potri.001G123800.3 | 27.4311 | 83.0735  | -1.5986 | Down | 8.58E-39  | 6.53E-38  |
| Unigene24158  | Potri.009G011000.2 | 3.0957  | 9.3758   | -1.5987 | Down | 4.83E-34  | 3.27E-33  |
| Unigene2537   | Potri.013G077900.1 | 32.8567 | 99.5168  | -1.5988 | Down | 1.28E-73  | 1.91E-72  |
| Unigene36472  | Potri.009G075700.1 | 17.341  | 52.5228  | -1.5988 | Down | 1.19E-25  | 6.34E-25  |
| Unigene82411  | Potri.009G048100.1 | 22.7227 | 68.8229  | -1.5988 | Down | 1.14E-37  | 8.43E-37  |
| Unigene21797  | Potri.015G085500.1 | 4.1905  | 12.6948  | -1.599  | Down | 2.00E-47  | 1.86E-46  |
| Unigene30593  | Potri.004G040900.3 | 15.7626 | 47.7515  | -1.599  | Down | 1.59E-24  | 8.19E-24  |
| Unigene24377  | Potri.004G033100.1 | 3.3288  | 10.0846  | -1.5991 | Down | 3.66E-28  | 2.11E-27  |
| Unigene21365  | Potri.010G004400.2 | 4.371   | 13.2429  | -1.5992 | Down | 4.70E-39  | 3.60E-38  |
| Unigene21600  | Potri.006G166500.2 | 4.878   | 14.7791  | -1.5992 | Down | 1.11E-42  | 9.28E-42  |
| Unigene31819  | Potri.005G098100.1 | 20.0267 | 60.6752  | -1.5992 | Down | 0         | 0         |
| Unigene40910  | Potri.001G347100.1 | 39.2704 | 118.9828 | -1.5992 | Down | 2.33E-123 | 6.49E-122 |
| Unigene57816  | Potri.T178400.1    | 1.8195  | 5.5132   | -1.5993 | Down | 5.34E-05  | 1.06E-04  |
| Unigene36227  | Potri.015G089000.1 | 1.0379  | 3.1449   | -1.5993 | Down | 5.34E-05  | 1.06E-04  |

|               |                     |         |          |         |      |           |           |
|---------------|---------------------|---------|----------|---------|------|-----------|-----------|
| Unigene16427  | Potri.002G187100.2  | 2.6883  | 8.1456   | -1.5993 | Down | 9.58E-09  | 2.54E-08  |
| Unigene14280  | Potri.016G022800.2  | 2.1545  | 6.5283   | -1.5994 | Down | 5.34E-05  | 1.06E-04  |
| Unigene36177  | Potri.015G039200.1  | 1.5582  | 4.7215   | -1.5994 | Down | 5.34E-05  | 1.06E-04  |
| Unigene75384  | Potri.014G145300.4  | 10.8508 | 32.8788  | -1.5994 | Down | 4.21E-16  | 1.61E-15  |
| Unigene66854  | Potri.014G068600.1  | 3.8256  | 11.5919  | -1.5994 | Down | 9.58E-09  | 2.54E-08  |
| Unigene108992 | Potri.010G182100.1  | 5.6568  | 17.1406  | -1.5994 | Down | 9.58E-09  | 2.54E-08  |
| Unigene94789  | Potri.005G045100.1  | 1.9189  | 5.8146   | -1.5994 | Down | 5.34E-05  | 1.06E-04  |
| Unigene50762  | Potri.004G081700.1  | 7.7843  | 23.587   | -1.5994 | Down | 2.12E-23  | 1.06E-22  |
| Unigene12586  | Potri.010G255200.4  | 9.1989  | 27.8762  | -1.5995 | Down | 2.62E-51  | 2.63E-50  |
| Unigene21294  | Potri.009G131300.1  | 16.2507 | 49.2509  | -1.5996 | Down | 3.77E-154 | 1.40E-152 |
| Unigene8273   | Potri.002G140000.1  | 5.3453  | 16.2006  | -1.5997 | Down | 2.84E-22  | 1.36E-21  |
| Unigene12409  | Potri.008G077800.1  | 10.3228 | 31.2881  | -1.5998 | Down | 1.09E-35  | 7.71E-35  |
| Unigene40438  | Potri.019G032800.6  | 8.6983  | 26.3666  | -1.5999 | Down | 5.71E-15  | 2.08E-14  |
| Unigene23529  | Potri.001G100700.1  | 1.8083  | 5.4813   | -1.5999 | Down | 5.71E-15  | 2.08E-14  |
| Unigene21765  | Potri.010G177200.4  | 8.5841  | 26.0216  | -1.6    | Down | 2.16E-84  | 3.77E-83  |
| Unigene48464  | Potri.001G304600.1  | 36.19   | 109.7047 | -1.6    | Down | 9.87E-98  | 2.05E-96  |
| Unigene11255  | Potri.001G233700.1  | 3.555   | 10.7774  | -1.6001 | Down | 3.43E-60  | 4.09E-59  |
| Unigene111776 | Potri.018G113600.2  | 11.0634 | 33.5444  | -1.6003 | Down | 1.70E-17  | 6.87E-17  |
| Unigene49144  | Potri.017G065900.11 | 4.7645  | 14.4461  | -1.6003 | Down | 1.70E-17  | 6.87E-17  |
| Unigene25497  | Potri.012G074800.1  | 12.4927 | 37.8779  | -1.6003 | Down | 1.70E-17  | 6.87E-17  |
| Unigene47275  | Potri.006G210600.1  | 13.253  | 40.1852  | -1.6003 | Down | 1.16E-23  | 5.81E-23  |
| Unigene1866   | Potri.T041800.1     | 15.4288 | 46.7828  | -1.6004 | Down | 1.05E-45  | 9.34E-45  |
| Unigene29     | Potri.012G059300.5  | 10.7176 | 32.4979  | -1.6004 | Down | 0         | 0         |
| Unigene40479  | Potri.007G050600.2  | 11.9041 | 36.1002  | -1.6005 | Down | 2.55E-32  | 1.65E-31  |
| Unigene32824  | Potri.002G161100.2  | 2.965   | 8.9927   | -1.6007 | Down | 1.09E-28  | 6.40E-28  |
| Unigene43267  | Potri.001G368600.1  | 9.1671  | 27.804   | -1.6008 | Down | 2.48E-64  | 3.18E-63  |
| Unigene5359   | Potri.010G012800.5  | 24.8664 | 75.427   | -1.6009 | Down | 7.71E-40  | 6.03E-39  |
| Unigene11091  | Potri.009G082000.1  | 11.0721 | 33.5864  | -1.6009 | Down | 1.41E-129 | 4.17E-128 |
| Unigene42824  | Potri.010G152700.3  | 6.7972  | 20.6212  | -1.6011 | Down | 3.89E-110 | 9.41E-109 |
| Unigene44690  | Potri.006G092800.1  | 6.8174  | 20.6836  | -1.6012 | Down | 2.08E-21  | 9.68E-21  |
| Unigene80904  | Potri.001G244800.1  | 46.0672 | 139.7677 | -1.6012 | Down | 4.34E-72  | 6.30E-71  |
| Unigene34741  | Potri.015G033400.1  | 4.6192  | 14.0157  | -1.6013 | Down | 4.33E-35  | 3.01E-34  |
| Unigene48926  | Potri.009G100100.1  | 13.2121 | 40.0884  | -1.6013 | Down | 4.33E-35  | 3.01E-34  |
| Unigene26679  | Potri.008G055500.4  | 6.871   | 20.848   | -1.6013 | Down | 1.06E-12  | 3.49E-12  |
| Unigene32633  | Potri.013G119700.2  | 8.5789  | 26.0311  | -1.6014 | Down | 9.89E-49  | 9.40E-48  |
| Unigene20736  | Potri.002G090200.1  | 17.8034 | 54.0205  | -1.6014 | Down | 5.70E-71  | 8.13E-70  |
| Unigene11223  | Potri.005G027600.2  | 3.2767  | 9.9433   | -1.6015 | Down | 3.11E-15  | 1.14E-14  |
| Unigene8573   | Potri.008G107300.1  | 7.006   | 21.262   | -1.6016 | Down | 9.25E-18  | 3.79E-17  |
| Unigene35404  | Potri.001G304000.1  | 5.8076  | 17.6251  | -1.6016 | Down | 9.25E-18  | 3.79E-17  |

|               |                    |         |         |         |      |           |           |
|---------------|--------------------|---------|---------|---------|------|-----------|-----------|
| Unigene103728 | Potri.015G131600.4 | 2.6877  | 8.1571  | -1.6017 | Down | 2.79E-20  | 1.25E-19  |
| Unigene80185  | Potri.013G154500.1 | 12.4332 | 37.7349 | -1.6017 | Down | 2.79E-20  | 1.25E-19  |
| Unigene384    | Potri.013G010700.1 | 11.0438 | 33.5185 | -1.6017 | Down | 4.08E-60  | 4.86E-59  |
| Unigene51701  | Potri.008G145100.3 | 13.9026 | 42.1945 | -1.6017 | Down | 2.79E-20  | 1.25E-19  |
| Unigene20227  | Potri.001G279300.1 | 8.0148  | 24.327  | -1.6018 | Down | 2.59E-25  | 1.37E-24  |
| Unigene22535  | Potri.010G180600.1 | 9.8835  | 30      | -1.6019 | Down | 7.96E-28  | 4.54E-27  |
| Unigene44812  | Potri.010G172100.1 | 8.5618  | 25.988  | -1.6019 | Down | 5.38E-54  | 5.69E-53  |
| Unigene34601  | Potri.001G270000.1 | 10.1236 | 30.7299 | -1.6019 | Down | 1.70E-61  | 2.07E-60  |
| Unigene21163  | Potri.010G163000.3 | 31.7001 | 96.2304 | -1.602  | Down | 1.75E-81  | 2.93E-80  |
| Unigene31968  | Potri.004G155600.1 | 9.3145  | 28.2768 | -1.6021 | Down | 7.09E-53  | 7.34E-52  |
| Unigene40745  | Potri.010G199100.2 | 4.846   | 14.7135 | -1.6023 | Down | 5.18E-09  | 1.40E-08  |
| Unigene52965  | Potri.010G147700.1 | 3.2434  | 9.8478  | -1.6023 | Down | 1.94E-06  | 4.37E-06  |
| Unigene45525  | Potri.009G150400.1 | 7.6548  | 23.2414 | -1.6023 | Down | 9.35E-52  | 9.47E-51  |
| Unigene67760  | Potri.005G088800.1 | 4.2888  | 13.0217 | -1.6023 | Down | 5.18E-09  | 1.40E-08  |
| Unigene24709  | Potri.004G174700.3 | 12.8664 | 39.0651 | -1.6023 | Down | 3.46E-24  | 1.76E-23  |
| Unigene73054  | Potri.002G105700.5 | 19.6313 | 59.6049 | -1.6023 | Down | 1.06E-26  | 5.85E-26  |
| Unigene34873  | Potri.001G444100.1 | 1.9083  | 5.7941  | -1.6023 | Down | 1.94E-06  | 4.37E-06  |
| Unigene1136   | Potri.011G161900.1 | 3.6304  | 11.0241 | -1.6025 | Down | 1.23E-55  | 1.34E-54  |
| Unigene6572   | Potri.002G105700.5 | 13.7705 | 41.8206 | -1.6026 | Down | 1.35E-30  | 8.30E-30  |
| Unigene31806  | Potri.012G042500.1 | 6.0865  | 18.4867 | -1.6028 | Down | 9.07E-80  | 1.48E-78  |
| Unigene29452  | Potri.009G042400.3 | 32.3846 | 98.3595 | -1.6028 | Down | 4.19E-111 | 1.03E-109 |
| Unigene23006  | Potri.001G018200.1 | 9.6588  | 29.3363 | -1.6028 | Down | 4.62E-23  | 2.27E-22  |
| Unigene13512  | Potri.007G031900.1 | 9.2015  | 27.9507 | -1.6029 | Down | 2.15E-48  | 2.03E-47  |
| Unigene34994  | Potri.011G096400.1 | 4.3463  | 13.2032 | -1.603  | Down | 1.79E-29  | 1.07E-28  |
| Unigene3075   | Potri.006G244100.1 | 4.8734  | 14.8037 | -1.603  | Down | 2.15E-48  | 2.03E-47  |
| Unigene3957   | Potri.010G245100.4 | 15.5576 | 47.2645 | -1.6031 | Down | 2.22E-38  | 1.67E-37  |
| Unigene29103  | Potri.010G050900.1 | 4.277   | 12.9932 | -1.6031 | Down | 6.93E-41  | 5.56E-40  |
| Unigene13460  | Potri.003G085900.1 | 6.1807  | 18.7763 | -1.6031 | Down | 6.93E-41  | 5.56E-40  |
| Unigene51668  | Potri.015G094800.2 | 11.8411 | 35.9753 | -1.6032 | Down | 1.89E-24  | 9.72E-24  |
| Unigene6728   | Potri.004G177600.1 | 3.3909  | 10.302  | -1.6032 | Down | 5.77E-13  | 1.92E-12  |
| Unigene68977  | Potri.002G032900.1 | 2.9673  | 9.0153  | -1.6032 | Down | 1.89E-24  | 9.72E-24  |
| Unigene38981  | Potri.002G003600.1 | 20.3995 | 61.979  | -1.6032 | Down | 3.68E-56  | 4.08E-55  |
| Unigene12741  | Potri.014G133200.1 | 2.1598  | 6.5625  | -1.6033 | Down | 6.19E-22  | 2.93E-21  |
| Unigene27484  | Potri.008G141400.4 | 25.635  | 77.8862 | -1.6033 | Down | 9.01E-45  | 7.86E-44  |
| Unigene36835  | Potri.012G092500.4 | 27.1376 | 82.4588 | -1.6034 | Down | 6.78E-107 | 1.57E-105 |
| Unigene91341  | Potri.002G105700.5 | 40.4377 | 122.874 | -1.6034 | Down | 2.12E-104 | 4.78E-103 |
| Unigene33971  | Potri.017G117900.1 | 4.9062  | 14.9085 | -1.6035 | Down | 2.04E-19  | 8.91E-19  |
| Unigene72666  | Potri.017G060200.1 | 13.9873 | 42.5036 | -1.6035 | Down | 2.04E-19  | 8.90E-19  |
| Unigene53152  | Potri.013G118900.1 | 12.4865 | 37.9431 | -1.6035 | Down | 2.04E-19  | 8.90E-19  |

|               |                    |         |          |         |      |           |           |
|---------------|--------------------|---------|----------|---------|------|-----------|-----------|
| Unigene6847   | Potri.011G122500.1 | 3.2326  | 9.8231   | -1.6035 | Down | 2.01E-10  | 5.88E-10  |
| Unigene22560  | Potri.010G094000.2 | 2.2449  | 6.8216   | -1.6035 | Down | 2.01E-10  | 5.88E-10  |
| Unigene39397  | Potri.005G055400.1 | 3.98    | 12.094   | -1.6035 | Down | 2.04E-19  | 8.90E-19  |
| Unigene51953  | Potri.001G123400.5 | 4.5745  | 13.9005  | -1.6035 | Down | 2.01E-10  | 5.88E-10  |
| Unigene15082  | Potri.013G006600.1 | 32.961  | 100.1709 | -1.6036 | Down | 2.92E-126 | 8.34E-125 |
| Unigene18498  | Potri.001G151600.1 | 2.2038  | 6.6975   | -1.6036 | Down | 6.81E-17  | 2.69E-16  |
| Unigene88717  | Potri.001G289200.1 | 17.8246 | 54.173   | -1.6037 | Down | 1.21E-38  | 9.21E-38  |
| Unigene21803  | Potri.008G009500.1 | 5.2786  | 16.044   | -1.6038 | Down | 3.89E-36  | 2.78E-35  |
| Unigene27935  | Potri.015G101300.2 | 4.8407  | 14.7144  | -1.6039 | Down | 3.17E-27  | 1.78E-26  |
| Unigene40392  | Potri.011G132800.1 | 4.1118  | 12.4985  | -1.6039 | Down | 7.29E-08  | 1.83E-07  |
| Unigene41063  | Potri.004G145500.2 | 43.6747 | 132.7547 | -1.6039 | Down | 2.68E-106 | 6.16E-105 |
| Unigene10696  | Potri.001G333300.1 | 2.1987  | 6.6834   | -1.6039 | Down | 3.17E-27  | 1.78E-26  |
| Unigene6194   | Potri.005G204900.3 | 1.9412  | 5.9008   | -1.604  | Down | 7.29E-08  | 1.83E-07  |
| Unigene9383   | Potri.006G021900.1 | 11.0238 | 33.5148  | -1.6042 | Down | 2.75E-18  | 1.15E-17  |
| Unigene48211  | Potri.003G206000.4 | 55.3159 | 168.1713 | -1.6042 | Down | 2.54E-91  | 4.84E-90  |
| Unigene40962  | Potri.010G113900.3 | 2.6433  | 8.037    | -1.6043 | Down | 7.91E-12  | 2.49E-11  |
| Unigene26163  | Potri.006G229400.1 | 7.4932  | 22.7836  | -1.6043 | Down | 7.91E-12  | 2.49E-11  |
| Unigene6413   | Potri.001G317600.1 | 13.1818 | 40.08    | -1.6043 | Down | 1.66E-32  | 1.08E-31  |
| Unigene23572  | Potri.010G023900.1 | 2.7021  | 8.2176   | -1.6046 | Down | 8.80E-38  | 6.54E-37  |
| Unigene14255  | Potri.006G148600.8 | 29.0312 | 88.2887  | -1.6046 | Down | 8.80E-38  | 6.54E-37  |
| Unigene12730  | Potri.001G315600.2 | 4.02    | 12.2255  | -1.6046 | Down | 1.11E-19  | 4.91E-19  |
| Unigene38403  | Potri.004G229900.1 | 16.8667 | 51.2958  | -1.6047 | Down | 1.14E-41  | 9.29E-41  |
| Unigene47530  | Potri.006G174700.1 | 24.1543 | 73.4663  | -1.6048 | Down | 2.82E-35  | 1.97E-34  |
| Unigene4912   | Potri.015G105100.1 | 1.6819  | 5.1164   | -1.605  | Down | 2.85E-05  | 5.75E-05  |
| Unigene96342  | Potri.010G152600.3 | 2.5263  | 7.6848   | -1.605  | Down | 2.85E-05  | 5.75E-05  |
| Unigene90201  | Potri.010G057700.2 | 3.3818  | 10.2874  | -1.605  | Down | 2.80E-09  | 7.67E-09  |
| Unigene17128  | Potri.008G146700.1 | 12.6818 | 38.5778  | -1.605  | Down | 1.51E-40  | 1.20E-39  |
| Unigene98347  | Potri.008G073200.3 | 1.4122  | 4.296    | -1.605  | Down | 2.85E-05  | 5.75E-05  |
| Unigene50084  | Potri.005G079400.1 | 2.9603  | 9.0051   | -1.605  | Down | 4.53E-21  | 2.09E-20  |
| Unigene119460 | Potri.005G001500.1 | 3.1083  | 9.4553   | -1.605  | Down | 3.71E-17  | 1.48E-16  |
| Unigene9219   | Potri.001G335400.1 | 1.1263  | 3.4261   | -1.605  | Down | 2.85E-05  | 5.75E-05  |
| Unigene41888  | Potri.001G118000.2 | 1.3967  | 4.2487   | -1.605  | Down | 2.85E-05  | 5.75E-05  |
| Unigene23694  | Potri.014G128300.1 | 7.1092  | 21.6278  | -1.6051 | Down | 1.39E-53  | 1.46E-52  |
| Unigene782    | Potri.002G114400.1 | 7.0925  | 21.5769  | -1.6051 | Down | 3.16E-65  | 4.12E-64  |
| Unigene34851  | Potri.006G050200.2 | 10.1578 | 30.905   | -1.6053 | Down | 2.93E-30  | 1.79E-29  |
| Unigene109543 | Potri.019G018500.5 | 12.838  | 39.0638  | -1.6054 | Down | 1.50E-18  | 6.32E-18  |
| Unigene32264  | Potri.019G013900.1 | 13.917  | 42.346   | -1.6054 | Down | 1.27E-131 | 3.83E-130 |
| Unigene80923  | Potri.011G056100.1 | 19.4671 | 59.2372  | -1.6055 | Down | 1.20E-31  | 7.66E-31  |
| Unigene15633  | Potri.011G049300.1 | 21.8432 | 66.4707  | -1.6055 | Down | 8.24E-41  | 6.59E-40  |



|               |                    |         |          |         |      |           |           |
|---------------|--------------------|---------|----------|---------|------|-----------|-----------|
| Unigene39395  | Potri.010G142700.1 | 20.1703 | 61.3811  | -1.6056 | Down | 5.29E-76  | 8.17E-75  |
| Unigene77670  | Potri.007G044300.1 | 33.9233 | 103.2344 | -1.6056 | Down | 5.80E-50  | 5.66E-49  |
| Unigene71136  | Potri.014G037100.1 | 26.4051 | 80.3704  | -1.6058 | Down | 2.05E-34  | 1.40E-33  |
| Unigene107404 | Potri.003G106200.4 | 7.4599  | 22.7046  | -1.6058 | Down | 1.09E-10  | 3.23E-10  |
| Unigene34925  | Potri.001G264800.1 | 14.0541 | 42.7759  | -1.6058 | Down | 7.20E-62  | 8.85E-61  |
| Unigene20756  | Potri.001G027400.1 | 5.3095  | 16.1599  | -1.6058 | Down | 1.09E-10  | 3.23E-10  |
| Unigene44803  | Potri.012G058200.1 | 3.73    | 11.3539  | -1.6059 | Down | 5.02E-16  | 1.91E-15  |
| Unigene32445  | Potri.009G014900.2 | 4.4306  | 13.4861  | -1.6059 | Down | 1.21E-77  | 1.92E-76  |
| Unigene42160  | Potri.006G060600.1 | 17.9445 | 54.6215  | -1.6059 | Down | 4.16E-54  | 4.41E-53  |
| Unigene85439  | Potri.004G129700.1 | 13.2936 | 40.4633  | -1.6059 | Down | 3.08E-25  | 1.62E-24  |
| Unigene37658  | Potri.011G136000.1 | 11.0323 | 33.582   | -1.606  | Down | 5.02E-16  | 1.91E-15  |
| Unigene40551  | Potri.001G399400.2 | 21.2601 | 64.7165  | -1.606  | Down | 5.06E-79  | 8.18E-78  |
| Unigene50536  | Potri.015G078500.2 | 9.1516  | 27.8607  | -1.6061 | Down | 6.59E-32  | 4.22E-31  |
| Unigene39600  | Potri.007G050800.1 | 10.7564 | 32.7478  | -1.6062 | Down | 1.01E-47  | 9.41E-47  |
| Unigene73462  | Potri.003G136700.1 | 78.1346 | 237.8736 | -1.6062 | Down | 8.50E-103 | 1.88E-101 |
| Unigene109730 | Potri.012G024800.3 | 3.9534  | 12.037   | -1.6063 | Down | 1.04E-06  | 2.40E-06  |
| Unigene33318  | Potri.011G092600.2 | 16.3186 | 49.6855  | -1.6063 | Down | 1.44E-38  | 1.09E-37  |
| Unigene33638  | Potri.011G050800.1 | 1.4715  | 4.4803   | -1.6063 | Down | 1.04E-06  | 2.40E-06  |
| Unigene46335  | Potri.008G214200.1 | 1.6435  | 5.0039   | -1.6063 | Down | 1.04E-06  | 2.40E-06  |
| Unigene26258  | Potri.008G037400.1 | 2.2517  | 6.8557   | -1.6063 | Down | 1.04E-06  | 2.40E-06  |
| Unigene106251 | Potri.001G372600.1 | 2.4234  | 7.3786   | -1.6063 | Down | 1.04E-06  | 2.40E-06  |
| Unigene33047  | Potri.001G272400.1 | 1.3038  | 3.9697   | -1.6063 | Down | 1.04E-06  | 2.40E-06  |
| Unigene34082  | Potri.001G459200.1 | 1.2766  | 3.887    | -1.6064 | Down | 1.04E-06  | 2.40E-06  |
| Unigene26015  | Potri.014G071100.3 | 36.5445 | 111.2821 | -1.6065 | Down | 3.95E-57  | 4.45E-56  |
| Unigene37463  | Potri.010G171400.1 | 9.4698  | 28.8376  | -1.6065 | Down | 4.11E-24  | 2.10E-23  |
| Unigene22684  | Potri.001G154700.3 | 14.3067 | 43.5667  | -1.6065 | Down | 1.33E-46  | 1.21E-45  |
| Unigene33063  | Potri.013G049800.1 | 8.7561  | 26.6663  | -1.6067 | Down | 8.75E-31  | 5.43E-30  |
| Unigene64503  | Potri.004G025900.4 | 6.2366  | 18.9943  | -1.6067 | Down | 1.70E-13  | 5.81E-13  |
| Unigene13691  | Potri.T134200.1    | 9.7618  | 29.7332  | -1.6069 | Down | 7.90E-39  | 6.02E-38  |
| Unigene18304  | Potri.012G058000.1 | 9.0504  | 27.5668  | -1.6069 | Down | 4.94E-64  | 6.31E-63  |
| Unigene88289  | Potri.005G098500.2 | 44.5334 | 135.6555 | -1.607  | Down | 5.90E-92  | 1.13E-90  |
| Unigene34805  | Potri.001G146000.1 | 7.0774  | 21.5589  | -1.607  | Down | 7.54E-112 | 1.86E-110 |
| Unigene38582  | Potri.019G054000.1 | 2.0643  | 6.2885   | -1.6071 | Down | 3.93E-08  | 1.00E-07  |
| Unigene112759 | Potri.016G006700.2 | 8.7942  | 26.7901  | -1.6071 | Down | 6.81E-15  | 2.47E-14  |
| Unigene48990  | Potri.006G153900.4 | 9.5725  | 29.1609  | -1.6071 | Down | 1.35E-21  | 6.33E-21  |
| Unigene51964  | Potri.006G135300.1 | 7.4428  | 22.6733  | -1.6071 | Down | 1.35E-21  | 6.33E-21  |
| Unigene37517  | Potri.002G011000.1 | 7.3584  | 22.4162  | -1.6071 | Down | 1.35E-21  | 6.33E-21  |
| Unigene10288  | Potri.001G222600.9 | 1.8149  | 5.5288   | -1.6071 | Down | 3.93E-08  | 1.00E-07  |
| Unigene6870   | Potri.009G134300.8 | 19.2006 | 58.4975  | -1.6072 | Down | 1.19E-57  | 1.35E-56  |

|               |                    |         |         |         |      |           |           |
|---------------|--------------------|---------|---------|---------|------|-----------|-----------|
| Unigene14544  | Potri.004G177000.1 | 17.1751 | 52.3342 | -1.6074 | Down | 2.25E-24  | 1.15E-23  |
| Unigene16617  | Potri.002G060200.3 | 26.4262 | 80.5187 | -1.6074 | Down | 9.63E-46  | 8.59E-45  |
| Unigene23093  | Potri.006G257900.2 | 4.2112  | 12.8333 | -1.6076 | Down | 9.20E-26  | 4.92E-25  |
| Unigene58666  | Potri.005G040300.2 | 4.782   | 14.5727 | -1.6076 | Down | 1.10E-17  | 4.50E-17  |
| Unigene36353  | Potri.001G015400.1 | 25.6817 | 78.2623 | -1.6076 | Down | 6.89E-50  | 6.71E-49  |
| Unigene21310  | Potri.001G150900.1 | 3.774   | 11.5018 | -1.6077 | Down | 1.13E-60  | 1.35E-59  |
| Unigene4080   | Potri.012G114200.1 | 15.3664 | 46.8356 | -1.6078 | Down | 1.55E-28  | 9.00E-28  |
| Unigene21784  | Potri.001G057400.3 | 3.0813  | 9.3911  | -1.6078 | Down | 4.46E-19  | 1.92E-18  |
| Unigene11307  | Potri.004G227700.7 | 6.7173  | 20.4745 | -1.6079 | Down | 2.19E-47  | 2.03E-46  |
| Unigene17046  | Potri.001G152700.1 | 8.9958  | 27.4205 | -1.6079 | Down | 1.81E-20  | 8.18E-20  |
| Unigene39340  | Potri.009G064100.1 | 6.2498  | 19.0539 | -1.6082 | Down | 3.00E-23  | 1.49E-22  |
| Unigene89078  | Potri.008G059100.1 | 24.6156 | 75.0433 | -1.6082 | Down | 2.71E-54  | 2.88E-53  |
| Unigene106046 | Potri.008G008100.1 | 5.7104  | 17.4092 | -1.6082 | Down | 2.33E-12  | 7.52E-12  |
| Unigene45923  | Potri.007G032500.1 | 2.151   | 6.5578  | -1.6082 | Down | 2.33E-12  | 7.52E-12  |
| Unigene11897  | Potri.001G046500.2 | 4.4382  | 13.5307 | -1.6082 | Down | 2.33E-12  | 7.52E-12  |
| Unigene30650  | Potri.009G124200.3 | 17.2683 | 52.6501 | -1.6083 | Down | 1.23E-24  | 6.35E-24  |
| Unigene1768   | Potri.004G131800.2 | 12.6337 | 38.5185 | -1.6083 | Down | 1.83E-35  | 1.29E-34  |
| Unigene11293  | Potri.014G036300.2 | 4.9921  | 15.2217 | -1.6084 | Down | 2.07E-50  | 2.03E-49  |
| Unigene32880  | Potri.017G107600.1 | 11.6972 | 35.6808 | -1.609  | Down | 5.86E-59  | 6.84E-58  |
| Unigene12695  | Potri.011G044200.6 | 5.0605  | 15.437  | -1.609  | Down | 4.02E-22  | 1.92E-21  |
| Unigene22341  | Potri.003G019700.1 | 10.0374 | 30.6173 | -1.609  | Down | 1.41E-57  | 1.60E-56  |
| Unigene23     | Potri.006G049300.1 | 9.7377  | 29.7064 | -1.6091 | Down | 5.89E-198 | 3.02E-196 |
| Unigene34283  | Potri.002G198500.1 | 20.4495 | 62.3854 | -1.6091 | Down | 8.32E-92  | 1.60E-90  |
| Unigene27101  | Potri.007G034900.1 | 29.0908 | 88.7488 | -1.6092 | Down | 3.60E-48  | 3.39E-47  |
| Unigene13658  | Potri.005G100200.3 | 4.2639  | 13.0087 | -1.6092 | Down | 2.75E-26  | 1.49E-25  |
| Unigene23576  | Potri.002G214100.1 | 43.6764 | 133.26  | -1.6093 | Down | 7.45E-200 | 3.88E-198 |
| Unigene83009  | Potri.002G108000.2 | 31.6906 | 96.6862 | -1.6093 | Down | 1.07E-53  | 1.13E-52  |
| Unigene30798  | Potri.014G115000.1 | 9.9516  | 30.364  | -1.6094 | Down | 7.83E-32  | 5.00E-31  |
| Unigene13240  | Potri.005G218700.2 | 10.6743 | 32.5729 | -1.6095 | Down | 1.12E-82  | 1.91E-81  |
| Unigene25025  | Potri.T092000.1    | 1.4772  | 4.5092  | -1.61   | Down | 4.34E-04  | 7.73E-04  |
| Unigene9524   | Potri.019G054600.3 | 3.0107  | 9.1903  | -1.61   | Down | 1.52E-05  | 3.15E-05  |
| Unigene8484   | Potri.018G024700.1 | 1.4724  | 4.4944  | -1.61   | Down | 1.52E-05  | 3.15E-05  |
| Unigene17741  | Potri.018G024400.2 | 1.4953  | 4.5645  | -1.61   | Down | 8.19E-10  | 2.31E-09  |
| Unigene118098 | Potri.017G109500.1 | 1.6496  | 5.0355  | -1.61   | Down | 1.52E-05  | 3.15E-05  |
| Unigene101886 | Potri.016G100200.1 | 1.3815  | 4.217   | -1.61   | Down | 4.34E-04  | 7.73E-04  |
| Unigene41699  | Potri.014G040200.1 | 1.6217  | 4.9504  | -1.61   | Down | 1.52E-05  | 3.15E-05  |
| Unigene1910   | Potri.013G146900.1 | 7.3376  | 22.3983 | -1.61   | Down | 5.39E-21  | 2.48E-20  |
| Unigene113204 | Potri.010G215100.1 | 1.7832  | 5.4434  | -1.61   | Down | 4.34E-04  | 7.73E-04  |
| Unigene7151   | Potri.010G137800.1 | 3.3237  | 10.1458 | -1.61   | Down | 8.19E-10  | 2.31E-09  |

|               |                    |          |          |         |      |           |           |
|---------------|--------------------|----------|----------|---------|------|-----------|-----------|
| Unigene116917 | Potri.009G151500.2 | 1.3282   | 4.0543   | -1.61   | Down | 4.34E-04  | 7.73E-04  |
| Unigene19603  | Potri.009G055400.1 | 22.5407  | 68.8063  | -1.61   | Down | 2.12E-40  | 1.68E-39  |
| Unigene25300  | Potri.008G025300.1 | 0.9881   | 3.0161   | -1.61   | Down | 4.34E-04  | 7.73E-04  |
| Unigene95373  | Potri.007G137900.2 | 1.0657   | 3.2531   | -1.61   | Down | 4.34E-04  | 7.73E-04  |
| Unigene26084  | Potri.006G275400.2 | 9.4562   | 28.8654  | -1.61   | Down | 5.04E-14  | 1.76E-13  |
| Unigene36562  | Potri.006G217600.2 | 12.9612  | 39.5646  | -1.61   | Down | 2.19E-22  | 1.06E-21  |
| Unigene85694  | Potri.006G132300.1 | 1.5329   | 4.6791   | -1.61   | Down | 4.34E-04  | 7.73E-04  |
| Unigene47141  | Potri.005G253000.1 | 5.402    | 16.4898  | -1.61   | Down | 5.39E-21  | 2.48E-20  |
| Unigene49559  | Potri.005G206600.3 | 1.565    | 4.7773   | -1.61   | Down | 1.52E-05  | 3.15E-05  |
| Unigene37421  | Potri.004G068100.2 | 1.3688   | 4.1783   | -1.61   | Down | 4.34E-04  | 7.73E-04  |
| Unigene37144  | Potri.004G006300.1 | 1.8572   | 5.6693   | -1.61   | Down | 4.34E-04  | 7.73E-04  |
| Unigene23514  | Potri.002G172700.1 | 3.961    | 12.0911  | -1.61   | Down | 1.27E-12  | 4.14E-12  |
| Unigene55935  | Potri.002G106200.1 | 7.6512   | 23.3555  | -1.61   | Down | 1.27E-12  | 4.14E-12  |
| Unigene17519  | Potri.002G066900.3 | 2.9708   | 9.0683   | -1.61   | Down | 1.52E-05  | 3.15E-05  |
| Unigene54150  | Potri.002G054400.1 | 2.1728   | 6.6325   | -1.61   | Down | 4.34E-04  | 7.73E-04  |
| Unigene8729   | Potri.001G389800.3 | 2.0658   | 6.306    | -1.61   | Down | 1.52E-05  | 3.15E-05  |
| Unigene31193  | Potri.001G171800.1 | 2.1519   | 6.5687   | -1.61   | Down | 5.60E-07  | 1.31E-06  |
| Unigene24937  | Potri.015G141800.1 | 1.3618   | 4.1571   | -1.6101 | Down | 1.52E-05  | 3.15E-05  |
| Unigene4719   | Potri.012G094000.1 | 45.5165  | 138.9573 | -1.6102 | Down | 3.65E-115 | 9.34E-114 |
| Unigene88117  | Potri.018G086700.4 | 146.9169 | 448.5505 | -1.6103 | Down | 1.04E-297 | 9.14E-296 |
| Unigene45372  | Potri.001G128700.2 | 8.1988   | 25.0328  | -1.6103 | Down | 5.28E-60  | 6.28E-59  |
| Unigene21570  | Potri.001G102500.1 | 3.3419   | 10.2039  | -1.6104 | Down | 1.02E-51  | 1.03E-50  |
| Unigene77783  | Potri.001G269900.1 | 48.3453  | 147.6332 | -1.6106 | Down | 2.64E-71  | 3.78E-70  |
| Unigene39871  | Potri.004G084800.6 | 53.8964  | 164.6036 | -1.6107 | Down | 3.74E-216 | 2.12E-214 |
| Unigene44912  | Potri.007G086700.3 | 7.6227   | 23.2819  | -1.6108 | Down | 2.00E-25  | 1.06E-24  |
| Unigene48105  | Potri.017G110600.1 | 14.5303  | 44.3813  | -1.6109 | Down | 4.89E-24  | 2.48E-23  |
| Unigene25570  | Potri.010G086400.1 | 22.8414  | 69.7678  | -1.6109 | Down | 4.53E-45  | 3.98E-44  |
| Unigene9938   | Potri.016G036900.1 | 10.4636  | 31.9625  | -1.611  | Down | 2.94E-21  | 1.37E-20  |
| Unigene23361  | Potri.015G109300.3 | 35.1922  | 107.5011 | -1.611  | Down | 1.00E-78  | 1.62E-77  |
| Unigene7342   | Potri.009G002400.1 | 19.2149  | 58.6948  | -1.611  | Down | 1.59E-60  | 1.90E-59  |
| Unigene38865  | Potri.005G092600.1 | 10.6391  | 32.4988  | -1.611  | Down | 2.94E-21  | 1.37E-20  |
| Unigene7546   | Potri.004G158900.1 | 5.1157   | 15.6276  | -1.6111 | Down | 7.23E-20  | 3.21E-19  |
| Unigene9327   | Potri.003G178600.3 | 13.2733  | 40.5472  | -1.6111 | Down | 7.23E-20  | 3.21E-19  |
| Unigene113790 | Potri.018G129800.1 | 10.4726  | 31.9936  | -1.6112 | Down | 1.78E-18  | 7.51E-18  |
| Unigene20972  | Potri.006G208900.1 | 3.9291   | 12.0034  | -1.6112 | Down | 1.78E-18  | 7.51E-18  |
| Unigene28647  | Potri.019G104400.1 | 2.4263   | 7.4128   | -1.6113 | Down | 4.42E-17  | 1.76E-16  |
| Unigene3236   | Potri.017G066300.1 | 5.1947   | 15.8722  | -1.6114 | Down | 1.10E-15  | 4.12E-15  |
| Unigene62133  | Potri.003G062700.1 | 2.8414   | 8.6827   | -1.6115 | Down | 2.74E-14  | 9.67E-14  |
| Unigene86091  | Potri.005G059000.3 | 6.9073   | 21.1074  | -1.6116 | Down | 2.74E-14  | 9.67E-14  |

|               |                    |         |          |         |      |           |           |
|---------------|--------------------|---------|----------|---------|------|-----------|-----------|
| Unigene16311  | Potri.019G041400.1 | 12.4756 | 38.1279  | -1.6117 | Down | 2.67E-24  | 1.37E-23  |
| Unigene25973  | Potri.008G056600.3 | 10.1827 | 31.1227  | -1.6118 | Down | 6.54E-23  | 3.20E-22  |
| Unigene93071  | Potri.010G120500.1 | 28.3953 | 86.791   | -1.6119 | Down | 3.38E-95  | 6.78E-94  |
| Unigene40831  | Potri.001G346700.4 | 47.0602 | 143.8405 | -1.6119 | Down | 4.53E-64  | 5.79E-63  |
| Unigene50055  | Potri.015G058400.6 | 11.8655 | 36.2707  | -1.612  | Down | 5.32E-50  | 5.19E-49  |
| Unigene81137  | Potri.008G004300.4 | 50.9168 | 155.6379 | -1.612  | Down | 3.79E-81  | 6.30E-80  |
| Unigene70416  | Potri.001G340000.1 | 6.3228  | 19.3269  | -1.612  | Down | 2.61E-61  | 3.18E-60  |
| Unigene12226  | Potri.014G141900.1 | 5.2627  | 16.0883  | -1.6121 | Down | 3.95E-20  | 1.76E-19  |
| Unigene42041  | Potri.011G103700.1 | 17.6915 | 54.0833  | -1.6121 | Down | 3.62E-57  | 4.08E-56  |
| Unigene75190  | Potri.005G047600.4 | 27.2508 | 83.3063  | -1.6121 | Down | 1.11E-38  | 8.46E-38  |
| Unigene14277  | Potri.002G018600.1 | 9.9798  | 30.5085  | -1.6121 | Down | 3.95E-20  | 1.76E-19  |
| Unigene77000  | Potri.001G309200.1 | 20.0343 | 61.243   | -1.6121 | Down | 4.13E-30  | 2.51E-29  |
| Unigene135    | Potri.017G117500.1 | 4.7868  | 14.6341  | -1.6122 | Down | 2.69E-37  | 1.98E-36  |
| Unigene52077  | Potri.005G111000.1 | 3.4293  | 10.4841  | -1.6122 | Down | 2.69E-37  | 1.98E-36  |
| Unigene52291  | Potri.001G170700.1 | 10.4905 | 32.0709  | -1.6122 | Down | 1.01E-28  | 5.89E-28  |
| Unigene3087   | Potri.012G014500.1 | 6.9894  | 21.3692  | -1.6123 | Down | 1.02E-95  | 2.05E-94  |
| Unigene18640  | Potri.008G072100.1 | 15.7185 | 48.0575  | -1.6123 | Down | 1.79E-44  | 1.55E-43  |
| Unigene42188  | Potri.003G063700.3 | 6.1201  | 18.7115  | -1.6123 | Down | 9.73E-19  | 4.13E-18  |
| Unigene45872  | Potri.006G076900.1 | 16.5251 | 50.5282  | -1.6124 | Down | 5.97E-26  | 3.22E-25  |
| Unigene77188  | Potri.005G219700.1 | 45.0838 | 137.8527 | -1.6124 | Down | 5.67E-66  | 7.49E-65  |
| Unigene20902  | Potri.001G123500.1 | 19.0761 | 58.326   | -1.6124 | Down | 4.33E-43  | 3.64E-42  |
| Unigene10648  | Potri.008G045400.4 | 10.1341 | 30.991   | -1.6126 | Down | 5.56E-129 | 1.63E-127 |
| Unigene94833  | Potri.016G064100.1 | 4.5523  | 13.9224  | -1.6127 | Down | 1.15E-08  | 3.01E-08  |
| Unigene38742  | Potri.015G002600.1 | 10.8402 | 33.1528  | -1.6127 | Down | 3.57E-23  | 1.76E-22  |
| Unigene119478 | Potri.005G093700.1 | 1.3414  | 4.1024   | -1.6127 | Down | 1.15E-08  | 3.01E-08  |
| Unigene49161  | Potri.002G166800.4 | 2.8271  | 8.6462   | -1.6127 | Down | 1.15E-08  | 3.01E-08  |
| Unigene29981  | Potri.001G222300.1 | 11.364  | 34.7548  | -1.6127 | Down | 2.26E-30  | 1.39E-29  |
| Unigene50419  | Potri.001G046500.3 | 5.95    | 18.1971  | -1.6127 | Down | 3.57E-23  | 1.76E-22  |
| Unigene13576  | Potri.016G127600.1 | 4.7148  | 14.4204  | -1.6128 | Down | 2.37E-43  | 2.01E-42  |
| Unigene18920  | Potri.002G228900.4 | 10.7754 | 32.96    | -1.613  | Down | 8.64E-35  | 5.95E-34  |
| Unigene47181  | Potri.018G152600.2 | 17.6399 | 53.9671  | -1.6132 | Down | 5.08E-32  | 3.27E-31  |
| Unigene18992  | Potri.007G093200.6 | 13.1645 | 40.2728  | -1.6132 | Down | 3.34E-39  | 2.57E-38  |
| Unigene11572  | Potri.001G138000.1 | 4.4127  | 13.4997  | -1.6132 | Down | 3.26E-26  | 1.77E-25  |
| Unigene85384  | Potri.015G109300.3 | 29.9173 | 91.533   | -1.6133 | Down | 3.44E-55  | 3.73E-54  |
| Unigene50173  | Potri.006G065800.4 | 8.4421  | 25.8291  | -1.6133 | Down | 1.55E-72  | 2.27E-71  |
| Unigene22611  | Potri.T016200.2    | 2.7346  | 8.367    | -1.6134 | Down | 3.01E-07  | 7.21E-07  |
| Unigene51859  | Potri.013G154300.2 | 1.8213  | 5.5726   | -1.6134 | Down | 3.01E-07  | 7.21E-07  |
| Unigene108454 | Potri.009G112600.1 | 4.5048  | 13.7833  | -1.6134 | Down | 3.01E-07  | 7.21E-07  |
| Unigene29534  | Potri.005G123000.1 | 3.3664  | 10.3002  | -1.6134 | Down | 5.30E-19  | 2.28E-18  |

|               |                    |         |          |         |      |           |           |
|---------------|--------------------|---------|----------|---------|------|-----------|-----------|
| Unigene8715   | Potri.005G033600.3 | 1.1671  | 3.5709   | -1.6134 | Down | 3.01E-07  | 7.21E-07  |
| Unigene9526   | Potri.004G186500.1 | 2.3667  | 7.2415   | -1.6134 | Down | 3.01E-07  | 7.21E-07  |
| Unigene33661  | Potri.001G347000.1 | 7.2007  | 22.032   | -1.6134 | Down | 7.97E-25  | 4.15E-24  |
| Unigene58028  | Potri.001G286300.2 | 8.2278  | 25.1748  | -1.6134 | Down | 5.30E-19  | 2.28E-18  |
| Unigene38500  | Potri.010G087700.3 | 10.7423 | 32.8715  | -1.6135 | Down | 4.73E-35  | 3.28E-34  |
| Unigene32698  | Potri.010G049100.9 | 7.7724  | 23.7831  | -1.6135 | Down | 1.22E-46  | 1.11E-45  |
| Unigene52073  | Potri.014G114300.2 | 17.7339 | 54.268   | -1.6136 | Down | 4.79E-51  | 4.77E-50  |
| Unigene26027  | Potri.005G167900.1 | 14.4286 | 44.1541  | -1.6136 | Down | 1.95E-23  | 9.70E-23  |
| Unigene7382   | Potri.018G053800.5 | 21.9076 | 67.0432  | -1.6137 | Down | 1.88E-55  | 2.06E-54  |
| Unigene75522  | Potri.001G344400.2 | 78.3122 | 239.6566 | -1.6137 | Down | 4.29E-109 | 1.02E-107 |
| Unigene115117 | Potri.017G111500.2 | 29.7869 | 91.1622  | -1.6138 | Down | 4.53E-54  | 4.80E-53  |
| Unigene4069   | Potri.012G017500.1 | 22.1346 | 67.7455  | -1.6138 | Down | 1.17E-68  | 1.61E-67  |
| Unigene67850  | Potri.006G202900.5 | 6.7282  | 20.5925  | -1.6138 | Down | 5.17E-89  | 9.57E-88  |
| Unigene23227  | Potri.005G176400.3 | 8.0529  | 24.6464  | -1.6138 | Down | 2.78E-48  | 2.62E-47  |
| Unigene25568  | Potri.017G087900.1 | 8.9195  | 27.2997  | -1.6139 | Down | 4.78E-22  | 2.27E-21  |
| Unigene19695  | Potri.006G267600.3 | 14.0272 | 42.9329  | -1.6139 | Down | 4.78E-22  | 2.27E-21  |
| Unigene3626   | Potri.016G002700.2 | 44.3372 | 135.7198 | -1.614  | Down | 7.66E-104 | 1.71E-102 |
| Unigene15272  | Potri.008G200400.1 | 3.6041  | 11.0324  | -1.614  | Down | 3.25E-16  | 1.25E-15  |
| Unigene7669   | Potri.007G133800.1 | 6.1306  | 18.7654  | -1.614  | Down | 1.78E-26  | 9.76E-26  |
| Unigene35531  | Potri.006G142100.1 | 38.1311 | 116.7163 | -1.614  | Down | 4.44E-76  | 6.87E-75  |
| Unigene48189  | Potri.004G201900.1 | 8.4225  | 25.7819  | -1.614  | Down | 3.25E-16  | 1.25E-15  |
| Unigene21901  | Potri.014G180100.1 | 8.9041  | 27.2581  | -1.6141 | Down | 1.00E-39  | 7.78E-39  |
| Unigene53767  | Potri.004G082800.1 | 11.122  | 34.0478  | -1.6141 | Down | 1.17E-20  | 5.34E-20  |
| Unigene39597  | Potri.018G017600.1 | 5.6907  | 17.4217  | -1.6142 | Down | 4.35E-25  | 2.28E-24  |
| Unigene9691   | Potri.016G076500.2 | 1.9051  | 5.8333   | -1.6144 | Down | 8.11E-06  | 1.72E-05  |
| Unigene44377  | Potri.012G056900.2 | 12.4332 | 38.0672  | -1.6144 | Down | 5.65E-56  | 6.23E-55  |
| Unigene52558  | Potri.008G148200.1 | 2.1673  | 6.6361   | -1.6144 | Down | 8.11E-06  | 1.72E-05  |
| Unigene32274  | Potri.007G057900.1 | 6.5977  | 20.2013  | -1.6144 | Down | 9.81E-229 | 5.98E-227 |
| Unigene119404 | Potri.006G099600.7 | 1.8924  | 5.7944   | -1.6144 | Down | 2.40E-10  | 6.99E-10  |
| Unigene92199  | Potri.011G151400.1 | 1.5373  | 4.7072   | -1.6145 | Down | 8.11E-06  | 1.72E-05  |
| Unigene19100  | Potri.010G239100.1 | 20.4824 | 62.7168  | -1.6145 | Down | 8.83E-46  | 7.88E-45  |
| Unigene8032   | Potri.010G044300.2 | 1.4033  | 4.297    | -1.6145 | Down | 8.11E-06  | 1.72E-05  |
| Unigene113972 | Potri.008G169500.2 | 2.7049  | 8.2824   | -1.6145 | Down | 8.11E-06  | 1.72E-05  |
| Unigene115960 | Potri.001G454600.1 | 2.3312  | 7.1382   | -1.6145 | Down | 8.11E-06  | 1.72E-05  |
| Unigene117363 | Potri.001G206700.1 | 3.9592  | 12.1229  | -1.6145 | Down | 2.40E-10  | 6.99E-10  |
| Unigene16953  | Potri.006G065900.1 | 14.5608 | 44.5905  | -1.6146 | Down | 1.42E-35  | 9.96E-35  |
| Unigene13399  | Potri.006G142800.1 | 34.6973 | 106.2572 | -1.6147 | Down | 1.87E-94  | 3.73E-93  |
| Unigene12494  | Potri.002G238200.1 | 16.8904 | 51.7269  | -1.6147 | Down | 7.87E-52  | 7.98E-51  |
| Unigene42310  | Potri.004G003900.1 | 8.1849  | 25.0685  | -1.6148 | Down | 7.15E-18  | 2.94E-17  |

|               |                    |          |          |         |      |           |           |
|---------------|--------------------|----------|----------|---------|------|-----------|-----------|
| Unigene72167  | Potri.001G091300.2 | 117.5117 | 359.9112 | -1.6148 | Down | 4.19E-152 | 1.53E-150 |
| Unigene53041  | Potri.006G191400.2 | 12.7364  | 39.0091  | -1.6149 | Down | 7.15E-18  | 2.94E-17  |
| Unigene43726  | Potri.016G002400.1 | 17.5352  | 53.7137  | -1.615  | Down | 1.70E-56  | 1.89E-55  |
| Unigene78698  | Potri.015G104200.3 | 36.9861  | 113.2953 | -1.615  | Down | 1.70E-56  | 1.89E-55  |
| Unigene12859  | Potri.001G258600.3 | 3.549    | 10.871   | -1.615  | Down | 2.03E-13  | 6.89E-13  |
| Unigene49163  | Potri.001G001400.1 | 4.2273   | 12.9486  | -1.615  | Down | 2.03E-13  | 6.89E-13  |
| Unigene1002   | Potri.010G173400.1 | 4.8214   | 14.7694  | -1.6151 | Down | 1.41E-90  | 2.65E-89  |
| Unigene7913   | Potri.012G065000.1 | 6.41     | 19.6379  | -1.6152 | Down | 3.87E-58  | 4.45E-57  |
| Unigene35490  | Potri.016G041800.1 | 3.0371   | 9.305    | -1.6153 | Down | 6.19E-09  | 1.65E-08  |
| Unigene91890  | Potri.010G089500.1 | 2.6883   | 8.2362   | -1.6153 | Down | 6.19E-09  | 1.65E-08  |
| Unigene100707 | Potri.002G010500.1 | 1.2192   | 3.7353   | -1.6153 | Down | 6.19E-09  | 1.66E-08  |
| Unigene56270  | Potri.001G341900.1 | 2.4409   | 7.4782   | -1.6153 | Down | 6.19E-09  | 1.65E-08  |
| Unigene72140  | Potri.003G097700.1 | 19.7362  | 60.4729  | -1.6154 | Down | 5.32E-27  | 2.96E-26  |
| Unigene35696  | Potri.005G247400.1 | 6.263    | 19.1929  | -1.6156 | Down | 5.12E-12  | 1.63E-11  |
| Unigene50253  | Potri.014G166300.1 | 7.7827   | 23.8503  | -1.6157 | Down | 4.55E-33  | 3.01E-32  |
| Unigene41668  | Potri.014G041600.1 | 4.5364   | 13.9019  | -1.6157 | Down | 5.12E-12  | 1.63E-11  |
| Unigene2843   | Potri.010G216100.3 | 3.8701   | 11.8615  | -1.6158 | Down | 4.41E-15  | 1.61E-14  |
| Unigene29368  | Potri.008G106800.1 | 4.6928   | 14.383   | -1.6158 | Down | 4.41E-15  | 1.61E-14  |
| Unigene8492   | Potri.006G108400.1 | 5.1569   | 15.8044  | -1.6158 | Down | 1.30E-25  | 6.92E-25  |
| Unigene22208  | Potri.002G227300.2 | 2.6223   | 8.037    | -1.6158 | Down | 4.41E-15  | 1.61E-14  |
| Unigene32715  | Potri.001G057400.3 | 7.5627   | 23.1777  | -1.6158 | Down | 1.37E-49  | 1.32E-48  |
| Unigene105825 | Potri.003G117700.1 | 1.0006   | 3.0669   | -1.6159 | Down | 4.41E-15  | 1.61E-14  |
| Unigene23260  | Potri.005G170500.4 | 10.1661  | 31.1609  | -1.616  | Down | 1.03E-34  | 7.05E-34  |
| Unigene24334  | Potri.002G159900.2 | 12.7337  | 39.0319  | -1.616  | Down | 2.94E-54  | 3.13E-53  |
| Unigene708    | Potri.013G125800.1 | 8.1264   | 24.9104  | -1.6161 | Down | 8.51E-122 | 2.34E-120 |
| Unigene92865  | Potri.014G150600.1 | 24.5507  | 75.2688  | -1.6163 | Down | 4.55E-80  | 7.47E-79  |
| Unigene22287  | Potri.011G106400.1 | 4.6445   | 14.2393  | -1.6163 | Down | 2.17E-39  | 1.67E-38  |
| Unigene11802  | Potri.005G086700.2 | 7.1402   | 21.8914  | -1.6163 | Down | 1.80E-48  | 1.71E-47  |
| Unigene42466  | Potri.004G191300.1 | 6.8972   | 21.1462  | -1.6163 | Down | 8.58E-142 | 2.85E-140 |
| Unigene38592  | Potri.T046200.1    | 1.3736   | 4.212    | -1.6165 | Down | 2.29E-04  | 4.22E-04  |
| Unigene19860  | Potri.019G132100.2 | 1.3285   | 4.0736   | -1.6165 | Down | 2.29E-04  | 4.22E-04  |
| Unigene10420  | Potri.019G039900.2 | 1.5492   | 4.7503   | -1.6165 | Down | 2.29E-04  | 4.22E-04  |
| Unigene35454  | Potri.018G011600.1 | 1.5248   | 4.6756   | -1.6165 | Down | 2.29E-04  | 4.22E-04  |
| Unigene1423   | Potri.017G000800.1 | 3.2543   | 9.9789   | -1.6165 | Down | 1.10E-13  | 3.79E-13  |
| Unigene65706  | Potri.015G110900.2 | 5.7046   | 17.4924  | -1.6165 | Down | 1.30E-10  | 3.84E-10  |
| Unigene40274  | Potri.015G063600.5 | 1.0752   | 3.2968   | -1.6165 | Down | 2.29E-04  | 4.22E-04  |
| Unigene52002  | Potri.014G132300.2 | 4.314    | 13.2282  | -1.6165 | Down | 9.65E-17  | 3.79E-16  |
| Unigene66194  | Potri.007G025700.1 | 1.8507   | 5.675    | -1.6165 | Down | 2.29E-04  | 4.22E-04  |
| Unigene30036  | Potri.006G247100.1 | 1.1642   | 3.5699   | -1.6165 | Down | 1.62E-07  | 3.95E-07  |

|               |                    |         |          |         |      |           |           |
|---------------|--------------------|---------|----------|---------|------|-----------|-----------|
| Unigene2064   | Potri.005G079900.4 | 4.8489  | 14.8685  | -1.6165 | Down | 1.10E-13  | 3.79E-13  |
| Unigene54008  | Potri.019G022300.1 | 1.6109  | 4.9397   | -1.6166 | Down | 2.29E-04  | 4.22E-04  |
| Unigene31100  | Potri.011G125700.2 | 1.276   | 3.9128   | -1.6166 | Down | 2.29E-04  | 4.22E-04  |
| Unigene41663  | Potri.007G115400.1 | 1.5442  | 4.7352   | -1.6166 | Down | 2.29E-04  | 4.22E-04  |
| Unigene116693 | Potri.007G071700.1 | 1.4783  | 4.5331   | -1.6166 | Down | 2.29E-04  | 4.22E-04  |
| Unigene3680   | Potri.002G139000.1 | 1.8578  | 5.6968   | -1.6166 | Down | 2.29E-04  | 4.22E-04  |
| Unigene46287  | Potri.001G165000.1 | 1.0144  | 3.1106   | -1.6166 | Down | 2.29E-04  | 4.22E-04  |
| Unigene3554   | Potri.001G015700.1 | 1.4738  | 4.5193   | -1.6166 | Down | 2.29E-04  | 4.22E-04  |
| Unigene38885  | Potri.017G147500.2 | 13.7625 | 42.2071  | -1.6167 | Down | 1.11E-42  | 9.29E-42  |
| Unigene44236  | Potri.015G092800.1 | 14.7288 | 45.1677  | -1.6167 | Down | 6.86E-70  | 9.62E-69  |
| Unigene86069  | Potri.002G099500.4 | 86.1532 | 264.2482 | -1.6169 | Down | 3.44E-161 | 1.35E-159 |
| Unigene23649  | Potri.015G050400.1 | 9.1625  | 28.1039  | -1.617  | Down | 4.14E-64  | 5.30E-63  |
| Unigene75131  | Potri.017G050500.1 | 22.3116 | 68.4433  | -1.6171 | Down | 3.30E-32  | 2.13E-31  |
| Unigene36274  | Potri.002G213300.2 | 32.9507 | 101.0937 | -1.6173 | Down | 1.30E-47  | 1.21E-46  |
| Unigene30117  | Potri.001G009800.5 | 23.2737 | 71.4035  | -1.6173 | Down | 6.94E-37  | 5.05E-36  |
| Unigene18609  | Potri.013G128900.1 | 10.8105 | 33.1698  | -1.6174 | Down | 1.47E-41  | 1.20E-40  |
| Unigene51928  | Potri.007G147100.2 | 10.4864 | 32.1768  | -1.6175 | Down | 4.69E-20  | 2.09E-19  |
| Unigene74663  | Potri.017G058300.3 | 11.3446 | 34.8148  | -1.6177 | Down | 5.25E-17  | 2.09E-16  |
| Unigene29298  | Potri.010G054400.1 | 3.1005  | 9.5149   | -1.6177 | Down | 3.34E-09  | 9.10E-09  |
| Unigene13933  | Potri.005G111700.1 | 2.2339  | 6.8556   | -1.6177 | Down | 3.34E-09  | 9.10E-09  |
| Unigene72732  | Potri.002G160900.4 | 30.8439 | 94.6671  | -1.6179 | Down | 8.05E-42  | 6.59E-41  |
| Unigene79877  | Potri.014G179700.1 | 22.2275 | 68.2328  | -1.6181 | Down | 9.19E-36  | 6.50E-35  |
| Unigene80534  | Potri.006G254100.1 | 21.8704 | 67.1367  | -1.6181 | Down | 9.19E-36  | 6.50E-35  |
| Unigene3272   | Potri.005G129800.1 | 5.5422  | 17.0124  | -1.6181 | Down | 4.38E-31  | 2.74E-30  |
| Unigene1048   | Potri.012G095600.1 | 1.9867  | 6.1      | -1.6184 | Down | 7.05E-11  | 2.11E-10  |
| Unigene28338  | Potri.017G052900.2 | 1.958   | 6.012    | -1.6185 | Down | 4.34E-06  | 9.47E-06  |
| Unigene115375 | Potri.016G018100.1 | 2.5902  | 7.9533   | -1.6185 | Down | 4.34E-06  | 9.47E-06  |
| Unigene31007  | Potri.015G072300.1 | 1.9631  | 6.0278   | -1.6185 | Down | 4.34E-06  | 9.47E-06  |
| Unigene89858  | Potri.015G041600.1 | 4.0765  | 12.5167  | -1.6185 | Down | 7.05E-11  | 2.11E-10  |
| Unigene16415  | Potri.014G094300.1 | 6.431   | 19.7462  | -1.6185 | Down | 1.31E-15  | 4.88E-15  |
| Unigene28547  | Potri.006G133300.2 | 8.0279  | 24.6524  | -1.6186 | Down | 5.03E-36  | 3.58E-35  |
| Unigene21840  | Potri.007G086900.1 | 29.4699 | 90.5046  | -1.6187 | Down | 3.95E-128 | 1.15E-126 |
| Unigene23661  | Potri.005G154300.1 | 13.5254 | 41.5372  | -1.6187 | Down | 5.15E-47  | 4.73E-46  |
| Unigene74426  | Potri.003G032300.3 | 18.4771 | 56.743   | -1.6187 | Down | 1.16E-26  | 6.37E-26  |
| Unigene49905  | Potri.018G066400.1 | 5.5661  | 17.0942  | -1.6188 | Down | 2.41E-42  | 2.00E-41  |
| Unigene9026   | Potri.012G137700.1 | 13.8088 | 42.4082  | -1.6188 | Down | 5.68E-22  | 2.70E-21  |
| Unigene26633  | Potri.001G472000.1 | 10.0156 | 30.759   | -1.6188 | Down | 5.68E-22  | 2.70E-21  |
| Unigene3623   | Potri.001G351000.1 | 11.9491 | 36.6986  | -1.6188 | Down | 5.86E-69  | 8.10E-68  |
| Unigene258    | Potri.014G177700.1 | 2.6055  | 8.0026   | -1.6189 | Down | 2.59E-28  | 1.50E-27  |

|              |                    |         |          |         |      |           |           |
|--------------|--------------------|---------|----------|---------|------|-----------|-----------|
| Unigene99152 | Potri.001G068700.1 | 1.9724  | 6.0579   | -1.6189 | Down | 2.86E-17  | 1.15E-16  |
| Unigene79226 | Potri.009G034900.4 | 21.8226 | 67.0309  | -1.619  | Down | 1.22E-34  | 8.35E-34  |
| Unigene74339 | Potri.004G175800.8 | 8.1539  | 25.0457  | -1.619  | Down | 1.51E-12  | 4.92E-12  |
| Unigene80017 | Potri.001G136600.1 | 7.1554  | 21.9788  | -1.619  | Down | 1.51E-12  | 4.92E-12  |
| Unigene32849 | Potri.018G108600.1 | 11.9305 | 36.6493  | -1.6191 | Down | 1.48E-64  | 1.90E-63  |
| Unigene21381 | Potri.005G054700.1 | 7.0531  | 21.6654  | -1.6191 | Down | 6.06E-52  | 6.16E-51  |
| Unigene29485 | Potri.008G085700.1 | 5.8602  | 18.0023  | -1.6192 | Down | 2.75E-36  | 1.97E-35  |
| Unigene34027 | Potri.016G114600.1 | 5.1988  | 15.9733  | -1.6194 | Down | 6.80E-46  | 6.09E-45  |
| Unigene37481 | Potri.016G025700.2 | 5.1912  | 15.9498  | -1.6194 | Down | 1.40E-20  | 6.33E-20  |
| Unigene5010  | Potri.011G032200.1 | 4.557   | 14.0012  | -1.6194 | Down | 8.72E-08  | 2.17E-07  |
| Unigene48900 | Potri.011G018900.1 | 1.6757  | 5.1485   | -1.6194 | Down | 8.72E-08  | 2.17E-07  |
| Unigene2320  | Potri.005G191100.1 | 1.704   | 5.2356   | -1.6194 | Down | 8.72E-08  | 2.17E-07  |
| Unigene46240 | Potri.002G249400.1 | 5.6105  | 17.2382  | -1.6194 | Down | 3.26E-14  | 1.15E-13  |
| Unigene64640 | Potri.001G163900.4 | 4.4759  | 13.7523  | -1.6194 | Down | 8.72E-08  | 2.17E-07  |
| Unigene132   | Potri.003G189700.2 | 2.3999  | 7.3743   | -1.6195 | Down | 6.66E-35  | 4.60E-34  |
| Unigene44139 | Potri.003G143700.4 | 12.6525 | 38.8766  | -1.6195 | Down | 3.72E-60  | 4.44E-59  |
| Unigene53830 | Potri.017G057700.3 | 11.0733 | 34.0318  | -1.6198 | Down | 6.90E-24  | 3.49E-23  |
| Unigene74991 | Potri.006G147500.1 | 22.0718 | 67.8356  | -1.6198 | Down | 7.16E-32  | 4.58E-31  |
| Unigene74570 | Potri.004G177000.1 | 43.3435 | 133.2065 | -1.6198 | Down | 2.04E-60  | 2.44E-59  |
| Unigene64659 | Potri.019G019800.1 | 5.0325  | 15.4681  | -1.6199 | Down | 1.81E-09  | 5.00E-09  |
| Unigene32456 | Potri.010G174000.1 | 15.5808 | 47.888   | -1.6199 | Down | 1.41E-163 | 5.70E-162 |
| Unigene14241 | Potri.002G050800.4 | 4.4188  | 13.5818  | -1.6199 | Down | 1.56E-17  | 6.32E-17  |
| Unigene69313 | Potri.001G183600.1 | 6.4653  | 19.8713  | -1.6199 | Down | 1.21E-71  | 1.74E-70  |
| Unigene30201 | Potri.018G009400.4 | 3.5523  | 10.9187  | -1.62   | Down | 1.81E-09  | 5.00E-09  |
| Unigene34464 | Potri.013G054300.2 | 6.6507  | 20.4433  | -1.62   | Down | 3.64E-35  | 2.53E-34  |
| Unigene30523 | Potri.008G139900.1 | 24.0577 | 73.9451  | -1.62   | Down | 2.15E-57  | 2.43E-56  |
| Unigene70957 | Potri.005G120600.1 | 18.9281 | 58.1786  | -1.62   | Down | 1.54E-25  | 8.20E-25  |
| Unigene49069 | Potri.001G245500.1 | 6.1117  | 18.7854  | -1.62   | Down | 1.56E-17  | 6.32E-17  |
| Unigene43192 | Potri.016G050900.1 | 8.0949  | 24.8855  | -1.6202 | Down | 5.17E-56  | 5.70E-55  |
| Unigene19326 | Potri.005G234800.1 | 8.6743  | 26.6655  | -1.6202 | Down | 8.23E-37  | 5.98E-36  |
| Unigene40579 | Potri.014G179800.2 | 14.8474 | 45.6473  | -1.6203 | Down | 2.68E-59  | 3.15E-58  |
| Unigene44095 | Potri.002G230800.1 | 24.6765 | 75.8713  | -1.6204 | Down | 1.40E-62  | 1.74E-61  |
| Unigene36341 | Potri.014G146600.1 | 83.3436 | 256.2849 | -1.6206 | Down | 2.23E-253 | 1.56E-251 |
| Unigene34899 | Potri.003G140800.1 | 3.4233  | 10.5265  | -1.6206 | Down | 8.19E-13  | 2.70E-12  |
| Unigene11854 | Potri.002G216800.1 | 1.8534  | 5.6991   | -1.6206 | Down | 8.19E-13  | 2.70E-12  |
| Unigene8045  | Potri.008G193200.1 | 4.3657  | 13.4255  | -1.6207 | Down | 8.42E-26  | 4.51E-25  |
| Unigene47974 | Potri.006G207900.2 | 18.0482 | 55.5051  | -1.6208 | Down | 2.31E-40  | 1.82E-39  |
| Unigene42882 | Potri.006G121000.1 | 7.5993  | 23.3712  | -1.6208 | Down | 2.42E-106 | 5.57E-105 |
| Unigene53509 | Potri.005G231500.1 | 10.0563 | 30.9268  | -1.6208 | Down | 1.77E-14  | 6.31E-14  |



|               |                     |         |         |         |      |           |           |
|---------------|---------------------|---------|---------|---------|------|-----------|-----------|
| Unigene41013  | Potri.002G254700.11 | 11.2718 | 34.6653 | -1.6208 | Down | 1.89E-27  | 1.06E-26  |
| Unigene27074  | Potri.016G097600.1  | 4.2047  | 12.9323 | -1.6209 | Down | 3.87E-16  | 1.48E-15  |
| Unigene46199  | Potri.005G049100.3  | 10.0111 | 30.7913 | -1.6209 | Down | 3.87E-16  | 1.48E-15  |
| Unigene51311  | Potri.017G109800.1  | 4.0026  | 12.3118 | -1.621  | Down | 8.49E-18  | 3.48E-17  |
| Unigene2851   | Potri.016G018300.1  | 6.965   | 21.4255 | -1.6211 | Down | 1.87E-19  | 8.17E-19  |
| Unigene103206 | Potri.T038600.1     | 6.957   | 21.402  | -1.6212 | Down | 4.15E-21  | 1.92E-20  |
| Unigene10614  | Potri.019G064000.3  | 13.595  | 41.8254 | -1.6213 | Down | 7.13E-240 | 4.65E-238 |
| Unigene45438  | Potri.007G140700.1  | 7.3989  | 22.7634 | -1.6213 | Down | 3.34E-47  | 3.08E-46  |
| Unigene23817  | Potri.016G001700.3  | 29.1054 | 89.5516 | -1.6214 | Down | 9.52E-106 | 2.18E-104 |
| Unigene45246  | Potri.015G138500.1  | 29.3115 | 90.1856 | -1.6214 | Down | 9.52E-106 | 2.18E-104 |
| Unigene17636  | Potri.014G023800.1  | 26.8144 | 82.5    | -1.6214 | Down | 7.48E-75  | 1.14E-73  |
| Unigene32077  | Potri.004G175700.1  | 3.4531  | 10.6244 | -1.6214 | Down | 1.03E-27  | 5.85E-27  |
| Unigene54294  | Potri.004G132900.1  | 12.4732 | 38.3762 | -1.6214 | Down | 4.60E-26  | 2.49E-25  |
| Unigene48887  | Potri.001G472600.8  | 12.5843 | 38.7195 | -1.6214 | Down | 1.03E-27  | 5.85E-27  |
| Unigene2721   | Potri.001G122700.2  | 6.5947  | 20.2915 | -1.6215 | Down | 5.20E-31  | 3.25E-30  |
| Unigene7731   | Potri.010G012900.1  | 10.6619 | 32.8087 | -1.6216 | Down | 4.10E-75  | 6.25E-74  |
| Unigene34444  | Potri.001G114400.1  | 4.6033  | 14.165  | -1.6216 | Down | 5.96E-36  | 4.24E-35  |
| Unigene62200  | Potri.006G265100.1  | 2.0944  | 6.4468  | -1.622  | Down | 2.33E-06  | 5.19E-06  |
| Unigene46578  | Potri.T036000.1     | 1.8989  | 5.8451  | -1.6221 | Down | 1.21E-04  | 2.30E-04  |
| Unigene30834  | Potri.016G100400.3  | 1.9412  | 5.9755  | -1.6221 | Down | 1.21E-04  | 2.30E-04  |
| Unigene107608 | Potri.013G060900.3  | 10.3405 | 31.8299 | -1.6221 | Down | 9.64E-15  | 3.48E-14  |
| Unigene41404  | Potri.013G007100.1  | 2.2253  | 6.8498  | -1.6221 | Down | 2.33E-06  | 5.19E-06  |
| Unigene13452  | Potri.011G114800.1  | 10.1891 | 31.3641 | -1.6221 | Down | 5.63E-28  | 3.22E-27  |
| Unigene26872  | Potri.010G197400.5  | 6.6461  | 20.4579 | -1.6221 | Down | 4.45E-13  | 1.49E-12  |
| Unigene25146  | Potri.010G086400.1  | 2.2127  | 6.8111  | -1.6221 | Down | 1.21E-04  | 2.30E-04  |
| Unigene1296   | Potri.009G138200.1  | 4.191   | 12.9005 | -1.6221 | Down | 4.63E-18  | 1.92E-17  |
| Unigene10511  | Potri.009G098000.1  | 12.0198 | 36.9992 | -1.6221 | Down | 2.84E-31  | 1.79E-30  |
| Unigene25938  | Potri.008G003200.1  | 23.4421 | 72.1592 | -1.6221 | Down | 2.28E-49  | 2.20E-48  |
| Unigene104795 | Potri.007G005600.1  | 1.9656  | 6.0505  | -1.6221 | Down | 2.07E-11  | 6.38E-11  |
| Unigene67316  | Potri.005G217300.1  | 1.7822  | 5.486   | -1.6221 | Down | 1.21E-04  | 2.30E-04  |
| Unigene109287 | Potri.005G058000.2  | 2.4516  | 7.5465  | -1.6221 | Down | 1.21E-04  | 2.30E-04  |
| Unigene8907   | Potri.004G222500.3  | 8.4772  | 26.0943 | -1.6221 | Down | 4.63E-18  | 1.92E-17  |
| Unigene89467  | Potri.004G052000.1  | 1.4668  | 4.5152  | -1.6221 | Down | 1.21E-04  | 2.30E-04  |
| Unigene4394   | Potri.004G041800.2  | 7.8329  | 24.1111 | -1.6221 | Down | 2.07E-11  | 6.38E-11  |
| Unigene49390  | Potri.003G051000.1  | 2.1638  | 6.6605  | -1.6221 | Down | 2.33E-06  | 5.19E-06  |
| Unigene75116  | Potri.003G041200.1  | 16.6911 | 51.3783 | -1.6221 | Down | 1.12E-24  | 5.82E-24  |
| Unigene46404  | Potri.003G038900.1  | 9.2349  | 28.4268 | -1.6221 | Down | 1.02E-19  | 4.50E-19  |
| Unigene117201 | Potri.002G202300.1  | 2.238   | 6.8889  | -1.6221 | Down | 2.33E-06  | 5.19E-06  |
| Unigene76799  | Potri.001G129700.1  | 4.5806  | 14.1001 | -1.6221 | Down | 4.70E-08  | 1.19E-07  |

|               |                    |         |          |         |      |           |           |
|---------------|--------------------|---------|----------|---------|------|-----------|-----------|
| Unigene18572  | Potri.007G128300.2 | 5.4198  | 16.6865  | -1.6224 | Down | 1.74E-59  | 2.05E-58  |
| Unigene32538  | Potri.008G201900.1 | 12.3465 | 38.0149  | -1.6225 | Down | 2.42E-46  | 2.18E-45  |
| Unigene86315  | Potri.006G111800.3 | 20.1418 | 62.0192  | -1.6225 | Down | 9.13E-40  | 7.12E-39  |
| Unigene45652  | Potri.003G200600.5 | 5.1609  | 15.8908  | -1.6225 | Down | 4.69E-43  | 3.94E-42  |
| Unigene37868  | Potri.002G253500.1 | 32.0421 | 98.6642  | -1.6226 | Down | 1.42E-107 | 3.32E-106 |
| Unigene44801  | Potri.001G319600.1 | 5.7384  | 17.6704  | -1.6226 | Down | 3.50E-33  | 2.32E-32  |
| Unigene13852  | Potri.018G149800.1 | 6.144   | 18.9199  | -1.6227 | Down | 1.55E-31  | 9.85E-31  |
| Unigene18675  | Potri.010G092300.2 | 10.2424 | 31.5412  | -1.6227 | Down | 6.91E-30  | 4.18E-29  |
| Unigene3402   | Potri.003G031000.2 | 40.2114 | 123.8421 | -1.6228 | Down | 7.42E-70  | 1.04E-68  |
| Unigene21808  | Potri.016G085900.2 | 23.5169 | 72.4314  | -1.6229 | Down | 4.16E-123 | 1.16E-121 |
| Unigene21693  | Potri.007G123100.1 | 4.137   | 12.7421  | -1.6229 | Down | 5.23E-60  | 6.22E-59  |
| Unigene1862   | Potri.006G207900.2 | 14.5817 | 44.9095  | -1.6229 | Down | 1.42E-66  | 1.89E-65  |
| Unigene4833   | Potri.010G224300.2 | 13.9204 | 42.877   | -1.623  | Down | 5.57E-20  | 2.48E-19  |
| Unigene44403  | Potri.007G049000.6 | 11.0203 | 33.9443  | -1.623  | Down | 2.21E-38  | 1.66E-37  |
| Unigene17763  | Potri.007G052500.9 | 10.2555 | 31.5916  | -1.6231 | Down | 1.91E-33  | 1.28E-32  |
| Unigene18044  | Potri.018G145500.2 | 4.2935  | 13.2264  | -1.6232 | Down | 8.50E-32  | 5.42E-31  |
| Unigene16595  | Potri.003G119800.1 | 8.3177  | 25.6233  | -1.6232 | Down | 1.15E-16  | 4.48E-16  |
| Unigene84968  | Potri.018G037200.1 | 53.3226 | 164.2783 | -1.6233 | Down | 3.83E-97  | 7.90E-96  |
| Unigene55850  | Potri.003G191600.1 | 4.3313  | 13.3436  | -1.6233 | Down | 3.78E-30  | 2.30E-29  |
| Unigene117387 | Potri.003G005500.1 | 10.3898 | 32.0138  | -1.6235 | Down | 3.35E-25  | 1.76E-24  |
| Unigene10706  | Potri.019G041300.1 | 12.7941 | 39.4234  | -1.6236 | Down | 8.83E-138 | 2.84E-136 |
| Unigene43592  | Potri.012G023200.3 | 11.2905 | 34.792   | -1.6236 | Down | 2.64E-99  | 5.63E-98  |
| Unigene24818  | Potri.015G143300.3 | 22.3469 | 68.8636  | -1.6237 | Down | 1.05E-33  | 7.02E-33  |
| Unigene2493   | Potri.001G278800.2 | 3.5563  | 10.9596  | -1.6237 | Down | 1.12E-11  | 3.51E-11  |
| Unigene88188  | Potri.011G126200.2 | 4.8899  | 15.0695  | -1.6238 | Down | 1.12E-11  | 3.51E-11  |
| Unigene9362   | Potri.008G192200.2 | 6.3646  | 19.6142  | -1.6238 | Down | 1.12E-11  | 3.51E-11  |
| Unigene44141  | Potri.008G004300.4 | 2.3278  | 7.1738   | -1.6238 | Down | 1.12E-11  | 3.51E-11  |
| Unigene42315  | Potri.005G050600.1 | 16.0924 | 49.5931  | -1.6238 | Down | 4.64E-32  | 2.99E-31  |
| Unigene52386  | Potri.003G140000.3 | 8.1831  | 25.2183  | -1.6238 | Down | 4.64E-32  | 2.99E-31  |
| Unigene10860  | Potri.012G060200.3 | 6.3326  | 19.5178  | -1.6239 | Down | 5.60E-66  | 7.40E-65  |
| Unigene15230  | Potri.005G006100.1 | 3.5891  | 11.0619  | -1.6239 | Down | 3.04E-20  | 1.36E-19  |
| Unigene69666  | Potri.014G110500.1 | 1.6101  | 4.9629   | -1.624  | Down | 5.29E-10  | 1.51E-09  |
| Unigene72442  | Potri.018G003100.1 | 32.4344 | 99.9777  | -1.6241 | Down | 4.21E-44  | 3.62E-43  |
| Unigene53055  | Potri.001G059900.3 | 25.6992 | 79.2168  | -1.6241 | Down | 1.29E-35  | 9.10E-35  |
| Unigene13846  | Potri.011G082100.2 | 11.4819 | 35.3944  | -1.6242 | Down | 1.85E-42  | 1.54E-41  |
| Unigene21665  | Potri.008G129600.1 | 12.5863 | 38.7995  | -1.6242 | Down | 1.90E-98  | 3.99E-97  |
| Unigene1622   | Potri.007G065400.2 | 5.5227  | 17.0261  | -1.6243 | Down | 6.24E-17  | 2.47E-16  |
| Unigene43733  | Potri.008G084400.4 | 34.4868 | 106.3261 | -1.6244 | Down | 3.84E-68  | 5.25E-67  |
| Unigene35086  | Potri.006G060900.1 | 3.0025  | 9.2573   | -1.6244 | Down | 1.13E-30  | 6.98E-30  |

|               |                    |          |          |         |      |           |           |
|---------------|--------------------|----------|----------|---------|------|-----------|-----------|
| Unigene93797  | Potri.014G036000.1 | 37.646   | 116.0768 | -1.6245 | Down | 3.92E-155 | 1.47E-153 |
| Unigene45943  | Potri.006G098300.1 | 1.6169   | 4.9856   | -1.6245 | Down | 2.53E-08  | 6.53E-08  |
| Unigene160    | Potri.006G053000.3 | 38.4108  | 118.4374 | -1.6245 | Down | 0         | 0         |
| Unigene83046  | Potri.017G043100.1 | 8.133    | 25.078   | -1.6246 | Down | 2.85E-15  | 1.05E-14  |
| Unigene9292   | Potri.008G205600.3 | 15.3213  | 47.2432  | -1.6246 | Down | 7.07E-36  | 5.02E-35  |
| Unigene12617  | Potri.005G240000.1 | 3.3437   | 10.3103  | -1.6246 | Down | 2.85E-15  | 1.05E-14  |
| Unigene117559 | Potri.003G145600.1 | 2.9314   | 9.0389   | -1.6246 | Down | 2.53E-08  | 6.53E-08  |
| Unigene21406  | Potri.017G101100.2 | 3.7597   | 11.5937  | -1.6247 | Down | 4.73E-94  | 9.34E-93  |
| Unigene42670  | Potri.007G041000.1 | 6.9632   | 21.4728  | -1.6247 | Down | 4.75E-106 | 1.09E-104 |
| Unigene50719  | Potri.014G092300.1 | 5.5775   | 17.2008  | -1.6248 | Down | 1.66E-20  | 7.50E-20  |
| Unigene37497  | Potri.004G225800.5 | 18.0972  | 55.8128  | -1.6248 | Down | 1.39E-32  | 9.05E-32  |
| Unigene36579  | Potri.012G038300.1 | 8.3069   | 25.6203  | -1.6249 | Down | 1.31E-13  | 4.50E-13  |
| Unigene18158  | Potri.011G092700.1 | 8.7165   | 26.8855  | -1.625  | Down | 3.56E-48  | 3.35E-47  |
| Unigene31758  | Potri.009G159000.1 | 10.3139  | 31.8133  | -1.625  | Down | 7.49E-19  | 3.19E-18  |
| Unigene10144  | Potri.014G077300.1 | 4.2744   | 13.185   | -1.6251 | Down | 4.47E-24  | 2.27E-23  |
| Unigene36609  | Potri.017G058300.3 | 26.3387  | 81.2517  | -1.6252 | Down | 1.08E-39  | 8.42E-39  |
| Unigene9489   | Potri.010G099100.1 | 15.7547  | 48.5994  | -1.6252 | Down | 2.74E-29  | 1.63E-28  |
| Unigene71991  | Potri.002G242100.1 | 25.2909  | 78.0181  | -1.6252 | Down | 1.71E-34  | 1.17E-33  |
| Unigene79413  | Potri.001G364800.1 | 18.0333  | 55.6283  | -1.6252 | Down | 2.74E-29  | 1.63E-28  |
| Unigene88325  | Potri.T091100.1    | 137.9295 | 425.5261 | -1.6253 | Down | 8.09E-290 | 6.87E-288 |
| Unigene69309  | Potri.018G040800.1 | 1.2782   | 3.9434   | -1.6253 | Down | 1.25E-06  | 2.84E-06  |
| Unigene105414 | Potri.015G143800.1 | 1.0575   | 3.2625   | -1.6253 | Down | 1.25E-06  | 2.84E-06  |
| Unigene40446  | Potri.014G000600.1 | 14.2973  | 44.1071  | -1.6253 | Down | 1.21E-65  | 1.59E-64  |
| Unigene117545 | Potri.008G149300.2 | 2.2299   | 6.8795   | -1.6253 | Down | 1.25E-06  | 2.84E-06  |
| Unigene45706  | Potri.001G022600.1 | 2.1113   | 6.5137   | -1.6253 | Down | 3.40E-17  | 1.36E-16  |
| Unigene16698  | Potri.007G019000.2 | 10.5204  | 32.4573  | -1.6254 | Down | 3.40E-17  | 1.36E-16  |
| Unigene48224  | Potri.016G029200.1 | 18.8092  | 58.0453  | -1.6257 | Down | 1.50E-29  | 8.98E-29  |
| Unigene52890  | Potri.006G162900.2 | 15.7287  | 48.537   | -1.6257 | Down | 9.36E-35  | 6.44E-34  |
| Unigene49474  | Potri.001G171400.1 | 3.8273   | 11.811   | -1.6257 | Down | 1.50E-29  | 8.98E-29  |
| Unigene317    | Potri.011G096000.2 | 9.7577   | 30.1135  | -1.6258 | Down | 6.81E-75  | 1.03E-73  |
| Unigene36255  | Potri.018G101100.1 | 6.9004   | 21.2982  | -1.626  | Down | 2.86E-10  | 8.30E-10  |
| Unigene6903   | Potri.012G062500.2 | 12.1593  | 37.5298  | -1.626  | Down | 1.16E-36  | 8.37E-36  |
| Unigene38396  | Potri.011G058500.1 | 26.2778  | 81.1084  | -1.626  | Down | 2.55E-101 | 5.55E-100 |
| Unigene25677  | Potri.016G040900.1 | 43.4543  | 134.1371 | -1.6261 | Down | 5.55E-140 | 1.82E-138 |
| Unigene1371   | Potri.008G064400.1 | 21.2154  | 65.487   | -1.6261 | Down | 1.66E-52  | 1.70E-51  |
| Unigene112491 | Potri.003G071300.1 | 7.9818   | 24.6403  | -1.6262 | Down | 7.13E-14  | 2.47E-13  |
| Unigene76011  | Potri.006G187700.2 | 19.8154  | 61.1748  | -1.6263 | Down | 8.19E-30  | 4.95E-29  |
| Unigene18062  | Potri.002G046000.1 | 2.921    | 9.0175   | -1.6263 | Down | 7.13E-14  | 2.47E-13  |
| Unigene47068  | Potri.004G043200.5 | 10.6943  | 33.0193  | -1.6265 | Down | 4.93E-21  | 2.27E-20  |

|               |                    |         |          |         |      |           |           |
|---------------|--------------------|---------|----------|---------|------|-----------|-----------|
| Unigene27116  | Potri.002G108000.2 | 33.855  | 104.5452 | -1.6267 | Down | 5.07E-83  | 8.64E-82  |
| Unigene28108  | Potri.003G108000.3 | 23.7773 | 73.4284  | -1.6268 | Down | 1.15E-63  | 1.45E-62  |
| Unigene88959  | Potri.002G229200.2 | 60.7604 | 187.6474 | -1.6268 | Down | 1.80E-134 | 5.59E-133 |
| Unigene18579  | Potri.018G099100.1 | 3.3204  | 10.255   | -1.6269 | Down | 8.44E-16  | 3.18E-15  |
| Unigene8119   | Potri.017G083200.3 | 2.6145  | 8.0746   | -1.6269 | Down | 1.37E-08  | 3.58E-08  |
| Unigene105451 | Potri.017G025800.1 | 1.8526  | 5.7217   | -1.6269 | Down | 6.43E-05  | 1.26E-04  |
| Unigene38205  | Potri.015G142900.3 | 1.6077  | 4.9654   | -1.6269 | Down | 1.37E-08  | 3.58E-08  |
| Unigene98089  | Potri.014G109600.1 | 2.7698  | 8.5543   | -1.6269 | Down | 6.43E-05  | 1.26E-04  |
| Unigene26730  | Potri.011G089300.1 | 7.0822  | 21.873   | -1.6269 | Down | 3.30E-12  | 1.06E-11  |
| Unigene7801   | Potri.011G055500.1 | 2.2697  | 7.01     | -1.6269 | Down | 1.37E-08  | 3.58E-08  |
| Unigene29003  | Potri.008G011500.6 | 3.4442  | 10.6373  | -1.6269 | Down | 1.24E-33  | 8.30E-33  |
| Unigene33718  | Potri.006G262200.1 | 8.8109  | 27.212   | -1.6269 | Down | 5.98E-23  | 2.93E-22  |
| Unigene6962   | Potri.006G038600.1 | 1.2774  | 3.9451   | -1.6269 | Down | 6.43E-05  | 1.26E-04  |
| Unigene6945   | Potri.005G258300.1 | 1.1536  | 3.5628   | -1.6269 | Down | 6.43E-05  | 1.26E-04  |
| Unigene119354 | Potri.005G207900.1 | 1.5738  | 4.8607   | -1.6269 | Down | 1.37E-08  | 3.58E-08  |
| Unigene88130  | Potri.005G194200.1 | 1.711   | 5.2843   | -1.6269 | Down | 6.43E-05  | 1.26E-04  |
| Unigene51300  | Potri.003G178600.3 | 6.8649  | 21.202   | -1.6269 | Down | 8.44E-16  | 3.18E-15  |
| Unigene40439  | Potri.003G056500.6 | 9.2862  | 28.6799  | -1.6269 | Down | 8.44E-16  | 3.18E-15  |
| Unigene42529  | Potri.004G160400.1 | 7.8674  | 24.3002  | -1.627  | Down | 1.79E-67  | 2.43E-66  |
| Unigene44977  | Potri.003G119800.1 | 10.357  | 31.9921  | -1.6271 | Down | 1.53E-35  | 1.08E-34  |
| Unigene44871  | Potri.005G093300.1 | 12.2527 | 37.8514  | -1.6272 | Down | 1.49E-44  | 1.30E-43  |
| Unigene32065  | Potri.017G100300.2 | 3.7828  | 11.687   | -1.6274 | Down | 6.78E-34  | 4.57E-33  |
| Unigene10774  | Potri.014G145300.4 | 17.9777 | 55.5413  | -1.6274 | Down | 1.83E-153 | 6.77E-152 |
| Unigene27940  | Potri.009G155500.3 | 13.4555 | 41.5709  | -1.6274 | Down | 6.78E-34  | 4.57E-33  |
| Unigene50479  | Potri.006G084900.1 | 4.983   | 15.3951  | -1.6274 | Down | 1.01E-17  | 4.12E-17  |
| Unigene82522  | Potri.004G158200.1 | 67.908  | 209.822  | -1.6275 | Down | 1.51E-114 | 3.84E-113 |
| Unigene19466  | Potri.002G008600.5 | 14.158  | 43.7469  | -1.6276 | Down | 2.31E-48  | 2.18E-47  |
| Unigene13145  | Potri.014G055800.2 | 1.7784  | 5.4958   | -1.6277 | Down | 1.55E-10  | 4.55E-10  |
| Unigene52821  | Potri.002G181800.1 | 5.3086  | 16.4052  | -1.6277 | Down | 1.21E-19  | 5.33E-19  |
| Unigene11524  | Potri.018G107000.4 | 9.781   | 30.2275  | -1.6278 | Down | 3.81E-79  | 6.18E-78  |
| Unigene41878  | Potri.016G022700.2 | 8.813   | 27.2377  | -1.6279 | Down | 3.97E-25  | 2.09E-24  |
| Unigene17281  | Potri.006G072100.1 | 2.8194  | 8.7143   | -1.628  | Down | 4.59E-16  | 1.75E-15  |
| Unigene84893  | Potri.003G220100.1 | 24.1195 | 74.5485  | -1.628  | Down | 4.47E-45  | 3.93E-44  |
| Unigene32543  | Potri.010G234600.1 | 3.8233  | 11.8177  | -1.6281 | Down | 1.59E-41  | 1.29E-40  |
| Unigene29130  | Potri.006G111600.1 | 3.9361  | 12.1666  | -1.6281 | Down | 1.47E-21  | 6.87E-21  |
| Unigene1382   | Potri.002G230700.1 | 6.2043  | 19.1775  | -1.6281 | Down | 1.47E-21  | 6.87E-21  |
| Unigene49095  | Potri.002G194000.4 | 34.2116 | 105.7598 | -1.6282 | Down | 1.96E-101 | 4.27E-100 |
| Unigene41589  | Potri.010G153600.1 | 1.1866  | 3.6684   | -1.6283 | Down | 6.69E-07  | 1.56E-06  |
| Unigene117327 | Potri.002G242200.5 | 4.8196  | 14.9001  | -1.6283 | Down | 1.79E-12  | 5.82E-12  |

|               |                    |         |          |         |      |           |           |
|---------------|--------------------|---------|----------|---------|------|-----------|-----------|
| Unigene6676   | Potri.001G319000.3 | 12.5545 | 38.813   | -1.6283 | Down | 2.03E-34  | 1.38E-33  |
| Unigene3111   | Potri.002G139700.1 | 5.0195  | 15.5201  | -1.6285 | Down | 7.31E-31  | 4.54E-30  |
| Unigene31923  | Potri.006G076900.1 | 9.5474  | 29.5215  | -1.6286 | Down | 1.24E-85  | 2.20E-84  |
| Unigene33283  | Potri.004G199200.2 | 7.3136  | 22.614   | -1.6286 | Down | 2.17E-25  | 1.15E-24  |
| Unigene7274   | Potri.016G004200.1 | 11.5757 | 35.7972  | -1.6287 | Down | 3.84E-40  | 3.02E-39  |
| Unigene19491  | Potri.015G079000.1 | 6.0668  | 18.7612  | -1.6287 | Down | 2.11E-14  | 7.48E-14  |
| Unigene33855  | Potri.014G035800.3 | 8.7764  | 27.1403  | -1.6287 | Down | 2.65E-27  | 1.49E-26  |
| Unigene109276 | Potri.009G097000.2 | 9.4562  | 29.2428  | -1.6287 | Down | 2.11E-14  | 7.48E-14  |
| Unigene4095   | Potri.015G135500.1 | 12.8881 | 39.8585  | -1.6288 | Down | 4.76E-42  | 3.91E-41  |
| Unigene12862  | Potri.012G077700.4 | 20.0566 | 62.0267  | -1.6288 | Down | 1.16E-67  | 1.58E-66  |
| Unigene20281  | Potri.007G056200.2 | 9.2704  | 28.6701  | -1.6288 | Down | 8.00E-22  | 3.78E-21  |
| Unigene37242  | Potri.001G087300.1 | 16.205  | 50.1186  | -1.6289 | Down | 3.25E-29  | 1.93E-28  |
| Unigene13533  | Potri.001G010500.2 | 16.1578 | 49.9717  | -1.6289 | Down | 2.07E-49  | 2.00E-48  |
| Unigene4958   | Potri.011G122700.3 | 13.7245 | 42.4508  | -1.629  | Down | 3.99E-31  | 2.50E-30  |
| Unigene83771  | Potri.014G025400.1 | 73.3649 | 226.9282 | -1.6291 | Down | 1.49E-128 | 4.34E-127 |
| Unigene81908  | Potri.008G183600.4 | 14.6586 | 45.3452  | -1.6292 | Down | 1.18E-25  | 6.32E-25  |
| Unigene23153  | Potri.002G089100.2 | 5.1964  | 16.0741  | -1.6292 | Down | 2.10E-40  | 1.66E-39  |
| Unigene43342  | Potri.011G003000.1 | 11.3104 | 34.9902  | -1.6293 | Down | 1.97E-77  | 3.11E-76  |
| Unigene9917   | Potri.003G011300.1 | 8.2365  | 25.4802  | -1.6293 | Down | 1.41E-51  | 1.43E-50  |
| Unigene24631  | Potri.014G148800.1 | 7.6146  | 23.5584  | -1.6294 | Down | 1.77E-90  | 3.33E-89  |
| Unigene107219 | Potri.017G108600.1 | 1.6817  | 5.2032   | -1.6295 | Down | 8.39E-11  | 2.51E-10  |
| Unigene13026  | Potri.010G054400.1 | 9.8734  | 30.548   | -1.6295 | Down | 1.78E-29  | 1.06E-28  |
| Unigene1675   | Potri.002G042000.1 | 11.832  | 36.6097  | -1.6295 | Down | 1.15E-40  | 9.15E-40  |
| Unigene5955   | Potri.014G076300.5 | 5.6009  | 17.3323  | -1.6297 | Down | 9.73E-13  | 3.20E-12  |
| Unigene44048  | Potri.010G215100.1 | 5.9832  | 18.5154  | -1.6297 | Down | 9.73E-13  | 3.20E-12  |
| Unigene75165  | Potri.008G051100.1 | 8.0049  | 24.7717  | -1.6297 | Down | 9.73E-13  | 3.20E-12  |
| Unigene3785   | Potri.006G050000.1 | 5.0962  | 15.7704  | -1.6297 | Down | 9.73E-13  | 3.20E-12  |
| Unigene44361  | Potri.003G148800.1 | 20.6245 | 63.8236  | -1.6297 | Down | 1.50E-57  | 1.71E-56  |
| Unigene62741  | Potri.018G020600.1 | 8.0767  | 24.9971  | -1.6299 | Down | 1.15E-14  | 4.11E-14  |
| Unigene2037   | Potri.008G020600.1 | 3.2771  | 10.1426  | -1.6299 | Down | 1.15E-14  | 4.11E-14  |
| Unigene82343  | Potri.006G060800.1 | 76.6075 | 237.0927 | -1.6299 | Down | 1.76E-128 | 5.13E-127 |
| Unigene37461  | Potri.004G046300.1 | 18.3575 | 56.8136  | -1.6299 | Down | 5.07E-39  | 3.89E-38  |
| Unigene81407  | Potri.001G193000.1 | 48.46   | 149.9826 | -1.6299 | Down | 4.07E-80  | 6.69E-79  |
| Unigene31842  | Potri.006G249100.1 | 10.1598 | 31.4467  | -1.63   | Down | 1.01E-87  | 1.84E-86  |
| Unigene105811 | Potri.008G202100.1 | 2.9191  | 9.0354   | -1.6301 | Down | 1.36E-16  | 5.31E-16  |
| Unigene35555  | Potri.004G133300.2 | 19.4741 | 60.2778  | -1.6301 | Down | 1.20E-46  | 1.09E-45  |
| Unigene25792  | Potri.003G063000.4 | 25.2674 | 78.2099  | -1.6301 | Down | 1.20E-46  | 1.09E-45  |
| Unigene34093  | Potri.009G085600.1 | 16.2588 | 50.3306  | -1.6302 | Down | 2.89E-54  | 3.08E-53  |
| Unigene460    | Potri.007G018500.1 | 8.7621  | 27.1227  | -1.6302 | Down | 9.80E-148 | 3.44E-146 |

|               |                    |         |          |         |      |           |           |
|---------------|--------------------|---------|----------|---------|------|-----------|-----------|
| Unigene5931   | Potri.011G077100.2 | 23.2938 | 72.111   | -1.6303 | Down | 2.77E-39  | 2.14E-38  |
| Unigene40036  | Potri.002G240800.2 | 8.5501  | 26.4683  | -1.6303 | Down | 3.61E-56  | 4.00E-55  |
| Unigene18367  | Potri.001G359400.1 | 11.3804 | 35.2359  | -1.6305 | Down | 2.38E-105 | 5.41E-104 |
| Unigene45494  | Potri.006G207600.1 | 35.2221 | 109.0596 | -1.6306 | Down | 2.09E-90  | 3.93E-89  |
| Unigene49824  | Potri.001G455600.1 | 17.8827 | 55.3709  | -1.6306 | Down | 2.09E-90  | 3.93E-89  |
| Unigene18113  | Potri.008G185400.1 | 8.7609  | 27.1293  | -1.6307 | Down | 1.88E-41  | 1.53E-40  |
| Unigene34730  | Potri.017G138500.5 | 9.778   | 30.2833  | -1.6309 | Down | 7.88E-93  | 1.53E-91  |
| Unigene60496  | Potri.010G029500.4 | 1.4036  | 4.3474   | -1.631  | Down | 4.54E-11  | 1.38E-10  |
| Unigene31536  | Potri.009G168600.2 | 2.7888  | 8.6379   | -1.631  | Down | 3.60E-07  | 8.56E-07  |
| Unigene116709 | Potri.003G095800.1 | 1.814   | 5.6186   | -1.631  | Down | 3.42E-05  | 6.87E-05  |
| Unigene17896  | Potri.002G086500.1 | 1.5173  | 4.6996   | -1.631  | Down | 3.60E-07  | 8.56E-07  |
| Unigene67191  | Potri.019G039300.3 | 1.2617  | 3.9081   | -1.6311 | Down | 3.42E-05  | 6.87E-05  |
| Unigene38437  | Potri.018G056800.3 | 1.4821  | 4.5907   | -1.6311 | Down | 3.60E-07  | 8.56E-07  |
| Unigene33087  | Potri.018G017200.2 | 3.7487  | 11.6113  | -1.6311 | Down | 4.54E-11  | 1.38E-10  |
| Unigene45929  | Potri.017G078900.1 | 4.2426  | 13.1411  | -1.6311 | Down | 3.60E-07  | 8.56E-07  |
| Unigene22404  | Potri.016G120200.2 | 4.2793  | 13.2547  | -1.6311 | Down | 3.06E-51  | 3.06E-50  |
| Unigene24529  | Potri.014G109600.1 | 4.808   | 14.8924  | -1.6311 | Down | 3.56E-32  | 2.30E-31  |
| Unigene7856   | Potri.012G106200.1 | 3.6096  | 11.1806  | -1.6311 | Down | 2.90E-30  | 1.77E-29  |
| Unigene12380  | Potri.012G093000.2 | 12.9363 | 40.0691  | -1.6311 | Down | 7.40E-59  | 8.63E-58  |
| Unigene18799  | Potri.010G239000.2 | 5.2931  | 16.3949  | -1.6311 | Down | 7.41E-17  | 2.92E-16  |
| Unigene20518  | Potri.010G142700.1 | 17.602  | 54.5209  | -1.6311 | Down | 1.03E-41  | 8.40E-41  |
| Unigene23248  | Potri.008G158800.2 | 2.7477  | 8.5107   | -1.6311 | Down | 4.54E-11  | 1.38E-10  |
| Unigene34635  | Potri.008G127900.1 | 29.7652 | 92.1955  | -1.6311 | Down | 7.00E-78  | 1.11E-76  |
| Unigene16106  | Potri.008G004300.4 | 13.2889 | 41.1614  | -1.6311 | Down | 1.30E-22  | 6.29E-22  |
| Unigene59086  | Potri.006G266000.2 | 1.3401  | 4.1509   | -1.6311 | Down | 3.60E-07  | 8.56E-07  |
| Unigene33693  | Potri.006G205200.1 | 8.0106  | 24.8123  | -1.6311 | Down | 7.41E-17  | 2.92E-16  |
| Unigene26933  | Potri.006G193300.1 | 2.3872  | 7.3941   | -1.6311 | Down | 3.42E-05  | 6.87E-05  |
| Unigene17029  | Potri.006G079700.2 | 2.3312  | 7.2208   | -1.6311 | Down | 6.23E-15  | 2.26E-14  |
| Unigene49244  | Potri.004G081200.1 | 1.9849  | 6.1481   | -1.6311 | Down | 3.60E-07  | 8.56E-07  |
| Unigene28670  | Potri.003G176600.1 | 6.1798  | 19.1415  | -1.6311 | Down | 2.36E-28  | 1.37E-27  |
| Unigene27564  | Potri.001G410500.1 | 5.6898  | 17.6236  | -1.6311 | Down | 8.88E-19  | 3.78E-18  |
| Unigene106256 | Potri.001G307600.3 | 1.3361  | 4.1385   | -1.6311 | Down | 3.60E-07  | 8.56E-07  |
| Unigene45183  | Potri.008G006100.1 | 10.0044 | 30.993   | -1.6313 | Down | 7.92E-65  | 1.02E-63  |
| Unigene21581  | Potri.008G116500.1 | 3.3162  | 10.276   | -1.6317 | Down | 1.05E-26  | 5.81E-26  |
| Unigene50035  | Potri.013G145800.1 | 10.0444 | 31.1268  | -1.6318 | Down | 3.82E-44  | 3.29E-43  |
| Unigene32882  | Potri.007G126900.2 | 7.649   | 23.7037  | -1.6318 | Down | 7.08E-23  | 3.46E-22  |
| Unigene53651  | Potri.003G050600.1 | 14.2475 | 44.152   | -1.6318 | Down | 7.08E-23  | 3.46E-22  |
| Unigene115356 | Potri.009G139400.1 | 28.462  | 88.2114  | -1.6319 | Down | 6.25E-54  | 6.61E-53  |
| Unigene11195  | Potri.002G179300.1 | 6.8002  | 21.0746  | -1.6319 | Down | 9.74E-58  | 1.11E-56  |

|               |                    |         |          |         |      |           |           |
|---------------|--------------------|---------|----------|---------|------|-----------|-----------|
| Unigene35881  | Potri.010G053600.4 | 31.3554 | 97.181   | -1.632  | Down | 5.02E-52  | 5.11E-51  |
| Unigene28970  | Potri.004G043200.3 | 14.5244 | 45.0189  | -1.6321 | Down | 9.32E-93  | 1.81E-91  |
| Unigene22347  | Potri.001G396500.1 | 25.4891 | 79.0045  | -1.6321 | Down | 9.32E-93  | 1.81E-91  |
| Unigene33479  | Potri.014G159300.4 | 13.0835 | 40.5561  | -1.6322 | Down | 7.05E-29  | 4.14E-28  |
| Unigene8160   | Potri.006G053900.2 | 4.1203  | 12.772   | -1.6322 | Down | 3.39E-15  | 1.24E-14  |
| Unigene17644  | Potri.004G203500.1 | 7.8598  | 24.3637  | -1.6322 | Down | 7.05E-29  | 4.14E-28  |
| Unigene50277  | Potri.011G056300.2 | 2.676   | 8.2959   | -1.6323 | Down | 2.87E-13  | 9.69E-13  |
| Unigene36128  | Potri.010G161300.6 | 6.8969  | 21.3816  | -1.6323 | Down | 2.87E-13  | 9.69E-13  |
| Unigene8670   | Potri.018G021100.2 | 11.5757 | 35.8895  | -1.6325 | Down | 3.87E-23  | 1.91E-22  |
| Unigene9799   | Potri.006G031900.1 | 7.4965  | 23.2444  | -1.6326 | Down | 3.19E-21  | 1.48E-20  |
| Unigene36499  | Potri.005G229000.1 | 15.7118 | 48.7177  | -1.6326 | Down | 4.73E-31  | 2.96E-30  |
| Unigene3515   | Potri.011G141400.1 | 1.5323  | 4.7514   | -1.6327 | Down | 2.46E-11  | 7.56E-11  |
| Unigene88074  | Potri.010G197600.2 | 21.5585 | 66.8525  | -1.6327 | Down | 7.79E-47  | 7.12E-46  |
| Unigene17085  | Potri.010G004100.4 | 10.9867 | 34.0679  | -1.6327 | Down | 1.60E-58  | 1.85E-57  |
| Unigene51836  | Potri.013G084500.1 | 12.898  | 39.9974  | -1.6328 | Down | 2.64E-19  | 1.15E-18  |
| Unigene42420  | Potri.010G078200.1 | 4.7671  | 14.7832  | -1.6328 | Down | 4.85E-37  | 3.55E-36  |
| Unigene52302  | Potri.003G086200.1 | 3.0022  | 9.3112   | -1.6329 | Down | 2.15E-09  | 5.93E-09  |
| Unigene23192  | Potri.002G128700.8 | 39.2787 | 121.8131 | -1.6329 | Down | 3.35E-186 | 1.60E-184 |
| Unigene15209  | Potri.014G000500.5 | 15.3222 | 47.5219  | -1.633  | Down | 2.57E-25  | 1.36E-24  |
| Unigene54055  | Potri.004G190900.2 | 6.1544  | 19.088   | -1.633  | Down | 2.15E-09  | 5.93E-09  |
| Unigene27556  | Potri.001G150200.1 | 3.3312  | 10.3318  | -1.633  | Down | 2.20E-17  | 8.85E-17  |
| Unigene19738  | Potri.006G142800.1 | 19.9864 | 61.9922  | -1.6331 | Down | 3.28E-39  | 2.53E-38  |
| Unigene28838  | Potri.001G455100.1 | 11.506  | 35.6899  | -1.6331 | Down | 6.42E-67  | 8.61E-66  |
| Unigene52070  | Potri.001G057100.1 | 10.2856 | 31.9046  | -1.6331 | Down | 2.11E-23  | 1.05E-22  |
| Unigene13252  | Potri.006G036800.1 | 4.7547  | 14.7493  | -1.6332 | Down | 1.84E-15  | 6.85E-15  |
| Unigene22124  | Potri.006G021900.1 | 7.4857  | 23.2212  | -1.6332 | Down | 2.10E-29  | 1.26E-28  |
| Unigene24596  | Potri.001G072400.1 | 20.4325 | 63.3803  | -1.6332 | Down | 2.65E-37  | 1.95E-36  |
| Unigene103978 | Potri.019G079500.1 | 13.9417 | 43.2522  | -1.6334 | Down | 2.33E-47  | 2.16E-46  |
| Unigene79121  | Potri.015G048700.3 | 16.7848 | 52.0733  | -1.6334 | Down | 1.72E-27  | 9.68E-27  |
| Unigene1838   | Potri.012G046300.3 | 19.8038 | 61.4409  | -1.6334 | Down | 2.81E-65  | 3.67E-64  |
| Unigene3792   | Potri.015G071800.2 | 19.8931 | 61.7204  | -1.6335 | Down | 1.98E-51  | 1.99E-50  |
| Unigene20621  | Potri.014G138600.1 | 1.6652  | 5.1667   | -1.6335 | Down | 1.93E-07  | 4.69E-07  |
| Unigene38827  | Potri.004G150300.2 | 22.09   | 68.5359  | -1.6335 | Down | 1.88E-45  | 1.66E-44  |
| Unigene119293 | Potri.T181700.1    | 1.398   | 4.3378   | -1.6336 | Down | 1.93E-07  | 4.69E-07  |
| Unigene118135 | Potri.008G169900.4 | 2.2799  | 7.0742   | -1.6336 | Down | 1.93E-07  | 4.69E-07  |
| Unigene12056  | Potri.008G077100.1 | 11.5837 | 35.942   | -1.6336 | Down | 1.40E-25  | 7.47E-25  |
| Unigene1589   | Potri.005G072100.1 | 6.4183  | 19.9148  | -1.6336 | Down | 1.51E-43  | 1.28E-42  |
| Unigene49197  | Potri.004G213700.1 | 2.1736  | 6.7444   | -1.6336 | Down | 1.93E-07  | 4.69E-07  |
| Unigene111659 | Potri.001G352000.2 | 11.9041 | 36.9362  | -1.6336 | Down | 1.44E-19  | 6.30E-19  |

|               |                    |         |          |         |      |           |           |
|---------------|--------------------|---------|----------|---------|------|-----------|-----------|
| Unigene20036  | Potri.008G118500.5 | 10.102  | 31.3482  | -1.6337 | Down | 1.15E-29  | 6.91E-29  |
| Unigene18003  | Potri.006G270000.1 | 5.3368  | 16.5616  | -1.6338 | Down | 1.15E-23  | 5.78E-23  |
| Unigene34493  | Potri.006G224900.1 | 4.0324  | 12.5136  | -1.6338 | Down | 1.15E-23  | 5.78E-23  |
| Unigene5532   | Potri.002G173100.1 | 31.2251 | 96.9038  | -1.6338 | Down | 9.07E-72  | 1.31E-70  |
| Unigene21696  | Potri.019G001900.1 | 9.9334  | 30.8299  | -1.634  | Down | 6.23E-74  | 9.30E-73  |
| Unigene92596  | Potri.006G060200.2 | 12.8146 | 39.7743  | -1.634  | Down | 6.66E-42  | 5.46E-41  |
| Unigene69721  | Potri.T121800.3    | 2.8877  | 8.963    | -1.6341 | Down | 9.48E-22  | 4.47E-21  |
| Unigene46564  | Potri.015G111200.1 | 10.0422 | 31.1693  | -1.6341 | Down | 9.48E-22  | 4.47E-21  |
| Unigene6902   | Potri.003G220800.1 | 2.2803  | 7.0777   | -1.6341 | Down | 1.34E-11  | 4.15E-11  |
| Unigene5562   | Potri.006G134200.6 | 21.0138 | 65.2302  | -1.6342 | Down | 5.37E-40  | 4.21E-39  |
| Unigene33430  | Potri.017G009100.1 | 5.3285  | 16.5411  | -1.6343 | Down | 1.00E-15  | 3.77E-15  |
| Unigene13624  | Potri.014G138400.1 | 8.5964  | 26.6855  | -1.6343 | Down | 6.28E-30  | 3.80E-29  |
| Unigene25443  | Potri.006G252300.1 | 6.6233  | 20.5621  | -1.6344 | Down | 4.34E-38  | 3.25E-37  |
| Unigene49530  | Potri.001G472600.8 | 9.2038  | 28.5732  | -1.6344 | Down | 7.84E-20  | 3.47E-19  |
| Unigene23084  | Potri.011G070900.2 | 34.0777 | 105.8032 | -1.6345 | Down | 3.20E-133 | 9.83E-132 |
| Unigene47758  | Potri.005G251300.4 | 84.5873 | 262.633  | -1.6345 | Down | 2.54E-131 | 7.64E-130 |
| Unigene45159  | Potri.006G003100.2 | 5.8574  | 18.1875  | -1.6346 | Down | 1.78E-52  | 1.83E-51  |
| Unigene10409  | Potri.010G241800.1 | 11.5993 | 36.0197  | -1.6347 | Down | 4.18E-26  | 2.26E-25  |
| Unigene27815  | Potri.010G161100.2 | 3.4     | 10.558   | -1.6347 | Down | 1.16E-09  | 3.26E-09  |
| Unigene103628 | Potri.010G125400.9 | 1.517   | 4.7107   | -1.6347 | Down | 1.82E-05  | 3.75E-05  |
| Unigene34323  | Potri.008G058300.1 | 10.8702 | 33.7556  | -1.6347 | Down | 2.37E-38  | 1.79E-37  |
| Unigene22022  | Potri.001G337300.1 | 2.7079  | 8.4089   | -1.6347 | Down | 4.18E-26  | 2.26E-25  |
| Unigene95495  | Potri.015G007400.1 | 1.1144  | 3.4606   | -1.6348 | Down | 1.82E-05  | 3.75E-05  |
| Unigene51501  | Potri.006G262200.1 | 6.237   | 19.368   | -1.6348 | Down | 8.47E-14  | 2.93E-13  |
| Unigene20190  | Potri.006G237500.1 | 1.2482  | 3.8761   | -1.6348 | Down | 1.82E-05  | 3.75E-05  |
| Unigene95309  | Potri.006G208900.2 | 2.1641  | 6.7204   | -1.6348 | Down | 1.82E-05  | 3.75E-05  |
| Unigene53128  | Potri.005G053700.1 | 11.1244 | 34.5452  | -1.6348 | Down | 6.51E-18  | 2.68E-17  |
| Unigene8921   | Potri.003G169300.2 | 1.7712  | 5.5002   | -1.6348 | Down | 1.82E-05  | 3.75E-05  |
| Unigene4477   | Potri.002G048500.3 | 2.991   | 9.2881   | -1.6348 | Down | 5.17E-22  | 2.46E-21  |
| Unigene43900  | Potri.016G060400.2 | 4.7809  | 14.849   | -1.635  | Down | 2.80E-28  | 1.61E-27  |
| Unigene108269 | Potri.008G140700.1 | 26.2545 | 81.5409  | -1.635  | Down | 1.92E-36  | 1.38E-35  |
| Unigene13652  | Potri.T003000.1    | 6.8231  | 21.1952  | -1.6352 | Down | 1.88E-30  | 1.15E-29  |
| Unigene43315  | Potri.005G045500.1 | 8.2621  | 25.6667  | -1.6353 | Down | 4.28E-51  | 4.27E-50  |
| Unigene33161  | Potri.007G118300.2 | 7.8622  | 24.4263  | -1.6354 | Down | 5.97E-43  | 5.01E-42  |
| Unigene48798  | Potri.006G169400.1 | 4.7312  | 14.699   | -1.6354 | Down | 7.24E-12  | 2.28E-11  |
| Unigene31290  | Potri.004G173600.1 | 14.0691 | 43.7102  | -1.6354 | Down | 1.26E-32  | 8.23E-32  |
| Unigene1604   | Potri.001G128700.2 | 3.4943  | 10.8561  | -1.6354 | Down | 7.24E-12  | 2.28E-11  |
| Unigene33102  | Potri.014G082900.1 | 14.8624 | 46.1821  | -1.6357 | Down | 7.97E-64  | 1.01E-62  |
| Unigene43217  | Potri.013G074900.1 | 20.5131 | 63.7421  | -1.6357 | Down | 1.09E-150 | 3.92E-149 |



|               |                    |         |          |         |      |           |           |
|---------------|--------------------|---------|----------|---------|------|-----------|-----------|
| Unigene18907  | Potri.004G007500.1 | 15.6438 | 48.6123  | -1.6357 | Down | 9.32E-60  | 1.10E-58  |
| Unigene24276  | Potri.002G068200.1 | 15.2928 | 47.519   | -1.6357 | Down | 4.81E-41  | 3.87E-40  |
| Unigene76402  | Potri.017G076500.2 | 8.5822  | 26.6716  | -1.6359 | Down | 4.60E-14  | 1.61E-13  |
| Unigene106051 | Potri.013G027200.1 | 1.4738  | 4.5804   | -1.6359 | Down | 1.04E-07  | 2.57E-07  |
| Unigene24851  | Potri.009G014400.1 | 1.8794  | 5.8409   | -1.6359 | Down | 1.04E-07  | 2.57E-07  |
| Unigene118737 | Potri.008G095700.2 | 2.0204  | 6.2789   | -1.6359 | Down | 1.04E-07  | 2.57E-07  |
| Unigene37425  | Potri.001G247700.1 | 4.8248  | 14.9945  | -1.6359 | Down | 1.04E-07  | 2.57E-07  |
| Unigene43578  | Potri.006G224800.3 | 12.717  | 39.526   | -1.636  | Down | 2.59E-116 | 6.70E-115 |
| Unigene675    | Potri.003G137200.1 | 7.2869  | 22.6483  | -1.636  | Down | 2.05E-68  | 2.81E-67  |
| Unigene21896  | Potri.016G135100.1 | 11.8221 | 36.7456  | -1.6361 | Down | 2.02E-91  | 3.85E-90  |
| Unigene10941  | Potri.016G002100.1 | 5.6208  | 17.4708  | -1.6361 | Down | 2.39E-64  | 3.07E-63  |
| Unigene11252  | Potri.010G112800.1 | 4.266   | 13.2595  | -1.6361 | Down | 8.34E-29  | 4.90E-28  |
| Unigene16     | Potri.008G044600.1 | 4.0317  | 12.5317  | -1.6361 | Down | 5.71E-79  | 9.24E-78  |
| Unigene2153   | Potri.007G070600.1 | 5.6143  | 17.4507  | -1.6361 | Down | 1.54E-22  | 7.44E-22  |
| Unigene78801  | Potri.015G108600.5 | 14.9822 | 46.5745  | -1.6363 | Down | 1.02E-24  | 5.30E-24  |
| Unigene19553  | Potri.012G058000.1 | 19.8509 | 61.7081  | -1.6363 | Down | 2.12E-39  | 1.64E-38  |
| Unigene32383  | Potri.006G147700.1 | 7.0896  | 22.0386  | -1.6363 | Down | 2.12E-39  | 1.64E-38  |
| Unigene95175  | Potri.019G130900.4 | 2.6534  | 8.2494   | -1.6364 | Down | 6.29E-10  | 1.79E-09  |
| Unigene17685  | Potri.019G103900.3 | 2.967   | 9.2243   | -1.6364 | Down | 6.29E-10  | 1.79E-09  |
| Unigene49890  | Potri.018G064700.3 | 8.6456  | 26.8788  | -1.6364 | Down | 3.84E-52  | 3.92E-51  |
| Unigene2661   | Potri.016G026800.1 | 7.8802  | 24.4992  | -1.6364 | Down | 6.81E-27  | 3.78E-26  |
| Unigene43669  | Potri.009G013000.2 | 12.3889 | 38.5168  | -1.6364 | Down | 6.16E-69  | 8.51E-68  |
| Unigene8423   | Potri.006G095500.3 | 5.0431  | 15.6845  | -1.637  | Down | 2.50E-14  | 8.84E-14  |
| Unigene85440  | Potri.008G114200.1 | 26.3291 | 81.9     | -1.6372 | Down | 9.24E-51  | 9.16E-50  |
| Unigene12360  | Potri.001G006400.1 | 8.3584  | 26.0022  | -1.6373 | Down | 6.92E-21  | 3.17E-20  |
| Unigene42978  | Potri.006G112600.1 | 5.4287  | 16.889   | -1.6374 | Down | 1.60E-44  | 1.39E-43  |
| Unigene75873  | Potri.003G166900.1 | 14.8864 | 46.3121  | -1.6374 | Down | 4.58E-23  | 2.25E-22  |
| Unigene22213  | Potri.012G040200.1 | 4.3162  | 13.4298  | -1.6376 | Down | 6.15E-34  | 4.15E-33  |
| Unigene3068   | Potri.006G063200.1 | 8.8541  | 27.5495  | -1.6376 | Down | 3.54E-66  | 4.69E-65  |
| Unigene45672  | Potri.001G403300.3 | 53.1592 | 165.408  | -1.6376 | Down | 1.32E-175 | 5.79E-174 |
| Unigene13247  | Potri.001G171600.1 | 5.2982  | 16.4851  | -1.6376 | Down | 9.14E-32  | 5.82E-31  |
| Unigene32322  | Potri.019G105100.1 | 5.3018  | 16.4974  | -1.6377 | Down | 1.29E-42  | 1.08E-41  |
| Unigene5791   | Potri.003G085500.1 | 47.8872 | 149.0201 | -1.6378 | Down | 3.14E-120 | 8.48E-119 |
| Unigene66205  | Potri.017G058300.1 | 3.7932  | 11.8058  | -1.638  | Down | 3.40E-10  | 9.82E-10  |
| Unigene7720   | Potri.017G050500.1 | 7.6488  | 23.8059  | -1.638  | Down | 1.04E-40  | 8.30E-40  |
| Unigene38325  | Potri.016G103100.1 | 3.5151  | 10.9405  | -1.638  | Down | 3.40E-10  | 9.82E-10  |
| Unigene10688  | Potri.016G043500.1 | 7.8709  | 24.4974  | -1.638  | Down | 4.80E-45  | 4.21E-44  |
| Unigene85155  | Potri.015G050300.2 | 17.6064 | 54.798   | -1.638  | Down | 3.36E-34  | 2.28E-33  |
| Unigene55636  | Potri.014G150000.1 | 2.4548  | 7.6403   | -1.638  | Down | 3.40E-10  | 9.82E-10  |

|              |                    |          |          |         |      |           |           |
|--------------|--------------------|----------|----------|---------|------|-----------|-----------|
| Unigene33555 | Potri.012G046300.3 | 23.7725  | 73.9891  | -1.638  | Down | 3.43E-73  | 5.06E-72  |
| Unigene64992 | Potri.011G046900.1 | 2.9039   | 9.0382   | -1.638  | Down | 2.13E-12  | 6.89E-12  |
| Unigene89380 | Potri.010G098800.4 | 1.8966   | 5.9029   | -1.638  | Down | 9.72E-06  | 2.05E-05  |
| Unigene25720 | Potri.006G261300.1 | 4.0939   | 12.7417  | -1.638  | Down | 3.40E-10  | 9.82E-10  |
| Unigene94536 | Potri.004G223100.1 | 1.7394   | 5.4136   | -1.638  | Down | 3.40E-10  | 9.82E-10  |
| Unigene47278 | Potri.001G241800.2 | 3.9964   | 12.4383  | -1.638  | Down | 3.40E-10  | 9.82E-10  |
| Unigene16798 | Potri.013G128600.2 | 1.5087   | 4.6958   | -1.6381 | Down | 9.72E-06  | 2.05E-05  |
| Unigene57868 | Potri.006G256000.2 | 1.2003   | 3.7359   | -1.6381 | Down | 5.60E-08  | 1.41E-07  |
| Unigene32004 | Potri.001G275400.4 | 27.1129  | 84.3973  | -1.6382 | Down | 0         | 0         |
| Unigene34972 | Potri.009G134300.8 | 4.5136   | 14.0541  | -1.6386 | Down | 1.36E-23  | 6.82E-23  |
| Unigene35968 | Potri.005G076200.3 | 8.8119   | 27.4404  | -1.6388 | Down | 3.13E-19  | 1.35E-18  |
| Unigene8948  | Potri.009G079900.1 | 6.5402   | 20.3678  | -1.6389 | Down | 4.78E-17  | 1.90E-16  |
| Unigene33464 | Potri.006G264500.1 | 16.5501  | 51.54    | -1.6389 | Down | 3.65E-50  | 3.57E-49  |
| Unigene37503 | Potri.013G057600.3 | 10.1558  | 31.6309  | -1.639  | Down | 7.39E-15  | 2.68E-14  |
| Unigene45169 | Potri.005G252300.1 | 2.6067   | 8.1187   | -1.639  | Down | 7.39E-15  | 2.68E-14  |
| Unigene24036 | Potri.005G124300.2 | 18.7689  | 58.4559  | -1.639  | Down | 1.21E-96  | 2.47E-95  |
| Unigene62306 | Potri.004G014800.1 | 108.7015 | 338.5604 | -1.639  | Down | 4.24E-198 | 2.18E-196 |
| Unigene30937 | Potri.016G081300.1 | 15.8982  | 49.5178  | -1.6391 | Down | 2.51E-39  | 1.94E-38  |
| Unigene42840 | Potri.010G023100.1 | 9.8455   | 30.6668  | -1.6391 | Down | 1.51E-156 | 5.72E-155 |
| Unigene44620 | Potri.011G057700.1 | 4.7529   | 14.8051  | -1.6392 | Down | 1.16E-12  | 3.79E-12  |
| Unigene27601 | Potri.005G129200.1 | 3.4179   | 10.6467  | -1.6392 | Down | 1.16E-12  | 3.79E-12  |
| Unigene6946  | Potri.001G460500.1 | 3.9263   | 12.2303  | -1.6392 | Down | 1.16E-12  | 3.79E-12  |
| Unigene18009 | Potri.001G273900.1 | 23.9133  | 74.4896  | -1.6392 | Down | 2.02E-90  | 3.81E-89  |
| Unigene33422 | Potri.006G217200.5 | 19.8402  | 61.8046  | -1.6393 | Down | 6.33E-44  | 5.42E-43  |
| Unigene23672 | Potri.002G213300.4 | 3.6594   | 11.4001  | -1.6394 | Down | 1.12E-21  | 5.28E-21  |
| Unigene37548 | Potri.002G170200.1 | 14.863   | 46.3048  | -1.6394 | Down | 1.37E-39  | 1.07E-38  |
| Unigene37847 | Potri.015G028300.2 | 6.0266   | 18.7765  | -1.6395 | Down | 1.84E-10  | 5.40E-10  |
| Unigene32003 | Potri.006G025400.5 | 12.6545  | 39.4253  | -1.6395 | Down | 2.78E-75  | 4.25E-74  |
| Unigene93939 | Potri.002G161500.1 | 6.0266   | 18.7765  | -1.6395 | Down | 1.81E-28  | 1.05E-27  |
| Unigene41801 | Potri.007G145000.1 | 5.71     | 17.7912  | -1.6396 | Down | 3.00E-35  | 2.09E-34  |
| Unigene9438  | Potri.019G006800.1 | 14.5099  | 45.2194  | -1.6399 | Down | 1.89E-44  | 1.64E-43  |
| Unigene23405 | Potri.003G000500.5 | 7.5853   | 23.6384  | -1.6399 | Down | 6.62E-31  | 4.12E-30  |
| Unigene53966 | Potri.008G205900.4 | 14.3723  | 44.7936  | -1.64   | Down | 6.12E-22  | 2.90E-21  |
| Unigene31646 | Potri.007G033900.1 | 1.8259   | 5.6906   | -1.64   | Down | 3.02E-08  | 7.75E-08  |
| Unigene29406 | Potri.016G074700.1 | 18.0181  | 56.159   | -1.6401 | Down | 3.76E-67  | 5.06E-66  |
| Unigene9594  | Potri.010G001900.3 | 16.7822  | 52.3124  | -1.6402 | Down | 6.48E-81  | 1.08E-79  |
| Unigene89812 | Potri.001G197600.3 | 35.4601  | 110.5368 | -1.6403 | Down | 1.68E-85  | 2.97E-84  |
| Unigene35845 | Potri.010G089500.1 | 6.5413   | 20.3925  | -1.6404 | Down | 6.27E-13  | 2.08E-12  |
| Unigene53474 | Potri.003G176600.1 | 4.7253   | 14.731   | -1.6404 | Down | 6.27E-13  | 2.08E-12  |

|               |                    |         |          |         |      |           |           |
|---------------|--------------------|---------|----------|---------|------|-----------|-----------|
| Unigene34454  | Potri.001G471000.1 | 3.7379  | 11.6529  | -1.6404 | Down | 2.21E-24  | 1.14E-23  |
| Unigene24381  | Potri.006G249700.2 | 10.3219 | 32.1819  | -1.6405 | Down | 1.33E-33  | 8.90E-33  |
| Unigene41352  | Potri.002G127900.1 | 7.1563  | 22.3121  | -1.6405 | Down | 1.42E-17  | 5.76E-17  |
| Unigene44425  | Potri.015G088200.1 | 4.1104  | 12.8162  | -1.6406 | Down | 2.40E-63  | 3.03E-62  |
| Unigene55440  | Potri.011G125800.2 | 7.2674  | 22.6593  | -1.6406 | Down | 3.32E-38  | 2.49E-37  |
| Unigene32568  | Potri.010G166100.6 | 6.3506  | 19.8009  | -1.6406 | Down | 3.40E-95  | 6.84E-94  |
| Unigene79799  | Potri.008G125700.1 | 23.0829 | 71.971   | -1.6406 | Down | 3.32E-38  | 2.49E-37  |
| Unigene15509  | Potri.005G170500.3 | 9.5784  | 29.8657  | -1.6406 | Down | 3.34E-22  | 1.60E-21  |
| Unigene48630  | Potri.001G000900.5 | 15.8523 | 49.4278  | -1.6406 | Down | 3.34E-22  | 1.60E-21  |
| Unigene4091   | Potri.018G121200.1 | 11.5451 | 35.9992  | -1.6407 | Down | 8.06E-27  | 4.46E-26  |
| Unigene33141  | Potri.008G014800.2 | 27.1185 | 84.5584  | -1.6407 | Down | 1.59E-72  | 2.33E-71  |
| Unigene29365  | Potri.006G092800.1 | 6.5748  | 20.5013  | -1.6407 | Down | 8.06E-27  | 4.46E-26  |
| Unigene49160  | Potri.017G119700.1 | 5.8935  | 18.3799  | -1.6409 | Down | 5.06E-20  | 2.25E-19  |
| Unigene61896  | Potri.014G062400.2 | 4.3746  | 13.6431  | -1.6409 | Down | 9.97E-11  | 2.97E-10  |
| Unigene39690  | Potri.006G193900.1 | 5.9454  | 18.5418  | -1.6409 | Down | 1.16E-47  | 1.08E-46  |
| Unigene21021  | Potri.003G116200.1 | 9.2338  | 28.7972  | -1.6409 | Down | 5.06E-20  | 2.25E-19  |
| Unigene34138  | Potri.018G018100.1 | 1.8125  | 5.6527   | -1.641  | Down | 5.19E-06  | 1.12E-05  |
| Unigene105672 | Potri.009G051800.2 | 1.2595  | 3.9281   | -1.641  | Down | 2.18E-15  | 8.09E-15  |
| Unigene41339  | Potri.007G051200.1 | 2.0482  | 6.3878   | -1.641  | Down | 5.19E-06  | 1.12E-05  |
| Unigene49577  | Potri.017G106800.3 | 16.826  | 52.4816  | -1.6411 | Down | 2.69E-36  | 1.93E-35  |
| Unigene32222  | Potri.010G185100.1 | 7.1885  | 22.4239  | -1.6413 | Down | 1.68E-96  | 3.44E-95  |
| Unigene9915   | Potri.017G050100.2 | 5.8192  | 18.1546  | -1.6414 | Down | 1.59E-131 | 4.79E-130 |
| Unigene16671  | Potri.015G133400.1 | 18.0989 | 56.4628  | -1.6414 | Down | 1.61E-29  | 9.64E-29  |
| Unigene28382  | Potri.010G219600.5 | 3.1727  | 9.8977   | -1.6414 | Down | 1.61E-29  | 9.64E-29  |
| Unigene24641  | Potri.013G081400.1 | 6.7055  | 20.9204  | -1.6415 | Down | 3.41E-13  | 1.15E-12  |
| Unigene69419  | Potri.001G041600.1 | 2.7292  | 8.5149   | -1.6415 | Down | 3.41E-13  | 1.15E-12  |
| Unigene106574 | Potri.012G061600.1 | 5.7537  | 17.9551  | -1.6418 | Down | 1.19E-15  | 4.45E-15  |
| Unigene14519  | Potri.010G220700.1 | 18.5857 | 57.9993  | -1.6418 | Down | 8.03E-37  | 5.84E-36  |
| Unigene100800 | Potri.006G034300.1 | 2.3515  | 7.3382   | -1.6418 | Down | 1.63E-08  | 4.25E-08  |
| Unigene70883  | Potri.004G002800.1 | 10.7631 | 33.5876  | -1.6418 | Down | 1.19E-15  | 4.45E-15  |
| Unigene28123  | Potri.019G018300.2 | 1.677   | 5.2334   | -1.6419 | Down | 1.63E-08  | 4.25E-08  |
| Unigene20113  | Potri.003G015300.1 | 2.3566  | 7.3542   | -1.6419 | Down | 1.63E-08  | 4.25E-08  |
| Unigene934    | Potri.008G206600.1 | 10.1903 | 31.8046  | -1.642  | Down | 3.55E-65  | 4.62E-64  |
| Unigene24429  | Potri.004G149900.1 | 4.7231  | 14.7427  | -1.6422 | Down | 4.39E-37  | 3.21E-36  |
| Unigene44369  | Potri.002G253800.1 | 12.2425 | 38.2129  | -1.6422 | Down | 1.44E-53  | 1.52E-52  |
| Unigene15466  | Potri.017G088900.1 | 2.8083  | 8.7663   | -1.6423 | Down | 5.40E-11  | 1.63E-10  |
| Unigene37809  | Potri.015G082500.1 | 6.7346  | 21.0228  | -1.6423 | Down | 5.40E-11  | 1.63E-10  |
| Unigene18901  | Potri.009G020600.1 | 6.65    | 20.7585  | -1.6423 | Down | 1.62E-39  | 1.26E-38  |
| Unigene74287  | Potri.014G001000.3 | 44.0655 | 137.5642 | -1.6424 | Down | 2.84E-63  | 3.58E-62  |

|               |                    |         |          |         |      |           |           |
|---------------|--------------------|---------|----------|---------|------|-----------|-----------|
| Unigene13342  | Potri.001G230000.1 | 7.5879  | 23.6876  | -1.6424 | Down | 6.03E-42  | 4.95E-41  |
| Unigene28195  | Potri.003G032300.3 | 6.0519  | 18.895   | -1.6425 | Down | 1.85E-13  | 6.30E-13  |
| Unigene44881  | Potri.014G191100.6 | 12.599  | 39.3369  | -1.6426 | Down | 2.12E-75  | 3.25E-74  |
| Unigene28696  | Potri.010G199500.1 | 5.4197  | 16.922   | -1.6426 | Down | 8.00E-78  | 1.27E-76  |
| Unigene44640  | Potri.006G127100.1 | 10.176  | 31.7734  | -1.6426 | Down | 2.19E-68  | 3.00E-67  |
| Unigene10974  | Potri.005G098300.1 | 8.281   | 25.8576  | -1.6427 | Down | 6.06E-59  | 7.07E-58  |
| Unigene17470  | Potri.006G057200.2 | 6.3235  | 19.747   | -1.6428 | Down | 2.29E-18  | 9.59E-18  |
| Unigene45434  | Potri.005G231000.2 | 19.9286 | 62.2297  | -1.6428 | Down | 4.56E-47  | 4.19E-46  |
| Unigene75993  | Potri.002G198300.2 | 11.4896 | 35.8796  | -1.6428 | Down | 2.29E-18  | 9.59E-18  |
| Unigene17413  | Potri.001G244300.1 | 8.5411  | 26.6737  | -1.6429 | Down | 8.19E-21  | 3.75E-20  |
| Unigene84791  | Potri.009G055400.1 | 39.4158 | 123.1206 | -1.6432 | Down | 5.09E-74  | 7.61E-73  |
| Unigene49589  | Potri.006G047100.4 | 19.3731 | 60.515   | -1.6432 | Down | 1.91E-76  | 2.98E-75  |
| Unigene22311  | Potri.005G122800.1 | 7.583   | 23.6867  | -1.6432 | Down | 1.91E-76  | 2.98E-75  |
| Unigene13078  | Potri.014G134200.1 | 21.1837 | 66.1746  | -1.6433 | Down | 4.21E-103 | 9.35E-102 |
| Unigene45324  | Potri.005G050600.1 | 36.2    | 113.0835 | -1.6433 | Down | 4.22E-209 | 2.31E-207 |
| Unigene32014  | Potri.008G045600.1 | 27.687  | 86.4966  | -1.6434 | Down | 6.11E-101 | 1.32E-99  |
| Unigene26959  | Potri.T150700.2    | 4.0397  | 12.6213  | -1.6435 | Down | 8.78E-09  | 2.33E-08  |
| Unigene95561  | Potri.018G126100.1 | 3.3909  | 10.5943  | -1.6435 | Down | 2.78E-06  | 6.17E-06  |
| Unigene116738 | Potri.014G080800.1 | 4.5212  | 14.1257  | -1.6435 | Down | 2.92E-11  | 8.94E-11  |
| Unigene10294  | Potri.013G020500.1 | 2.5118  | 7.8476   | -1.6435 | Down | 2.78E-06  | 6.17E-06  |
| Unigene42464  | Potri.002G123300.1 | 1.8588  | 5.8075   | -1.6435 | Down | 8.78E-09  | 2.33E-08  |
| Unigene97446  | Potri.002G111000.1 | 1.0145  | 3.1696   | -1.6435 | Down | 8.78E-09  | 2.33E-08  |
| Unigene12582  | Potri.001G136800.1 | 2.3758  | 7.4227   | -1.6435 | Down | 3.52E-16  | 1.35E-15  |
| Unigene69248  | Potri.001G046900.2 | 2.7753  | 8.6709   | -1.6435 | Down | 1.00E-13  | 3.46E-13  |
| Unigene41312  | Potri.019G085900.2 | 2.7629  | 8.6324   | -1.6436 | Down | 2.78E-06  | 6.17E-06  |
| Unigene62373  | Potri.018G087500.2 | 1.8511  | 5.7835   | -1.6436 | Down | 2.78E-06  | 6.17E-06  |
| Unigene66183  | Potri.009G065300.3 | 5.1702  | 16.1537  | -1.6436 | Down | 1.25E-18  | 5.27E-18  |
| Unigene43075  | Potri.007G028600.1 | 8.875   | 27.7286  | -1.6436 | Down | 4.36E-89  | 8.08E-88  |
| Unigene42881  | Potri.006G194600.2 | 11.449  | 35.7707  | -1.6436 | Down | 6.21E-94  | 1.22E-92  |
| Unigene40356  | Potri.005G181700.3 | 2.3607  | 7.3758   | -1.6436 | Down | 2.78E-06  | 6.17E-06  |
| Unigene8522   | Potri.004G172100.1 | 2.3167  | 7.2383   | -1.6436 | Down | 1.00E-13  | 3.46E-13  |
| Unigene2877   | Potri.004G077800.4 | 2.0755  | 6.4846   | -1.6436 | Down | 1.25E-18  | 5.27E-18  |
| Unigene8673   | Potri.003G190100.3 | 1.6054  | 5.0159   | -1.6436 | Down | 8.78E-09  | 2.33E-08  |
| Unigene6323   | Potri.002G082500.3 | 3.0826  | 9.6312   | -1.6436 | Down | 2.78E-06  | 6.17E-06  |
| Unigene99858  | Potri.001G338700.4 | 4.6431  | 14.5067  | -1.6436 | Down | 8.78E-09  | 2.33E-08  |
| Unigene51927  | Potri.001G209500.1 | 3.443   | 10.7573  | -1.6436 | Down | 8.78E-09  | 2.33E-08  |
| Unigene28771  | Potri.001G154500.1 | 3.5218  | 11.0035  | -1.6436 | Down | 2.14E-28  | 1.24E-27  |
| Unigene7581   | Potri.002G117500.1 | 11.836  | 36.9894  | -1.6439 | Down | 1.46E-99  | 3.11E-98  |
| Unigene6555   | Potri.001G125700.1 | 7.1525  | 22.3534  | -1.644  | Down | 4.28E-31  | 2.68E-30  |

|               |                    |         |          |         |      |           |           |
|---------------|--------------------|---------|----------|---------|------|-----------|-----------|
| Unigene1077   | Potri.008G117000.1 | 4.0203  | 12.5662  | -1.6442 | Down | 4.35E-41  | 3.50E-40  |
| Unigene2635   | Potri.018G082900.6 | 45.4748 | 142.162  | -1.6444 | Down | 1.49E-174 | 6.49E-173 |
| Unigene22431  | Potri.015G010900.4 | 9.7791  | 30.5707  | -1.6444 | Down | 1.18E-90  | 2.23E-89  |
| Unigene46019  | Potri.011G137700.1 | 2.658   | 8.3093   | -1.6444 | Down | 1.91E-16  | 7.42E-16  |
| Unigene40940  | Potri.010G204000.1 | 5.2089  | 16.2845  | -1.6444 | Down | 6.38E-29  | 3.75E-28  |
| Unigene52574  | Potri.006G024600.1 | 5.7168  | 17.8713  | -1.6444 | Down | 1.91E-16  | 7.42E-16  |
| Unigene72387  | Potri.009G092800.5 | 9.2344  | 28.8709  | -1.6445 | Down | 5.46E-14  | 1.90E-13  |
| Unigene33813  | Potri.008G145600.1 | 11.9265 | 37.2878  | -1.6445 | Down | 2.50E-51  | 2.51E-50  |
| Unigene25046  | Potri.002G098000.5 | 8.726   | 27.2817  | -1.6445 | Down | 5.46E-14  | 1.90E-13  |
| Unigene30854  | Potri.001G420900.1 | 4.1086  | 12.8454  | -1.6445 | Down | 5.46E-14  | 1.90E-13  |
| Unigene229    | Potri.002G108700.1 | 6.3347  | 19.8062  | -1.6446 | Down | 2.91E-71  | 4.18E-70  |
| Unigene701    | Potri.010G154000.2 | 12.1424 | 37.9673  | -1.6447 | Down | 2.49E-86  | 4.46E-85  |
| Unigene106564 | Potri.006G129000.3 | 1.8206  | 5.6929   | -1.6447 | Down | 1.58E-11  | 4.91E-11  |
| Unigene1963   | Potri.010G027900.1 | 6.0806  | 19.0141  | -1.6448 | Down | 1.33E-21  | 6.24E-21  |
| Unigene53709  | Potri.013G085000.1 | 16.7922 | 52.5129  | -1.6449 | Down | 3.48E-29  | 2.06E-28  |
| Unigene20039  | Potri.010G219600.5 | 3.4519  | 10.7953  | -1.6449 | Down | 3.70E-19  | 1.60E-18  |
| Unigene5788   | Potri.007G014600.1 | 24.6443 | 77.0695  | -1.6449 | Down | 9.84E-47  | 8.97E-46  |
| Unigene2448   | Potri.002G007800.2 | 8.2002  | 25.6443  | -1.6449 | Down | 3.01E-64  | 3.86E-63  |
| Unigene23773  | Potri.010G004700.2 | 21.8224 | 68.2534  | -1.6451 | Down | 1.07E-159 | 4.15E-158 |
| Unigene1670   | Potri.005G189400.1 | 1.7207  | 5.3819   | -1.6451 | Down | 4.74E-09  | 1.28E-08  |
| Unigene49606  | Potri.004G095300.2 | 2.4446  | 7.6462   | -1.6451 | Down | 4.74E-09  | 1.28E-08  |
| Unigene8736   | Potri.002G197300.1 | 2.1613  | 6.7601   | -1.6451 | Down | 4.74E-09  | 1.28E-08  |
| Unigene11393  | Potri.018G045800.2 | 9.6876  | 30.3028  | -1.6452 | Down | 4.10E-52  | 4.18E-51  |
| Unigene45694  | Potri.017G138000.1 | 3.913   | 12.2391  | -1.6452 | Down | 1.04E-16  | 4.08E-16  |
| Unigene4040   | Potri.008G202100.2 | 9.2012  | 28.7799  | -1.6452 | Down | 2.62E-24  | 1.34E-23  |
| Unigene24195  | Potri.008G178000.2 | 2.0005  | 6.2572   | -1.6452 | Down | 4.74E-09  | 1.28E-08  |
| Unigene118772 | Potri.006G275700.2 | 2.3743  | 7.4264   | -1.6452 | Down | 4.74E-09  | 1.28E-08  |
| Unigene17431  | Potri.003G133800.1 | 18.9555 | 59.2896  | -1.6452 | Down | 5.38E-47  | 4.94E-46  |
| Unigene41470  | Potri.001G291800.1 | 3.742   | 11.7044  | -1.6452 | Down | 4.74E-09  | 1.28E-08  |
| Unigene33115  | Potri.001G136600.1 | 19.4975 | 60.9882  | -1.6452 | Down | 4.10E-52  | 4.18E-51  |
| Unigene43980  | Potri.004G196300.1 | 9.8429  | 30.7901  | -1.6453 | Down | 3.14E-57  | 3.54E-56  |
| Unigene35808  | Potri.010G244700.1 | 33.0347 | 103.3445 | -1.6454 | Down | 6.57E-113 | 1.64E-111 |
| Unigene16099  | Potri.010G171100.1 | 13.1181 | 41.0366  | -1.6454 | Down | 7.24E-22  | 3.43E-21  |
| Unigene41482  | Potri.006G077800.1 | 18.1785 | 56.8686  | -1.6454 | Down | 1.40E-34  | 9.62E-34  |
| Unigene24492  | Potri.006G076900.1 | 29.1306 | 91.1307  | -1.6454 | Down | 2.25E-231 | 1.39E-229 |
| Unigene75392  | Potri.006G052400.2 | 46.1158 | 144.3014 | -1.6458 | Down | 5.57E-68  | 7.59E-67  |
| Unigene102448 | Potri.003G031400.1 | 1.0672  | 3.3396   | -1.6458 | Down | 8.59E-12  | 2.70E-11  |
| Unigene82998  | Potri.019G083300.1 | 17.6682 | 55.2924  | -1.6459 | Down | 2.08E-32  | 1.35E-31  |
| Unigene7455   | Potri.016G093900.1 | 3.4774  | 10.8826  | -1.6459 | Down | 3.95E-22  | 1.88E-21  |

|               |                    |         |          |         |      |           |           |
|---------------|--------------------|---------|----------|---------|------|-----------|-----------|
| Unigene32679  | Potri.013G161600.3 | 2.1     | 6.5718   | -1.6459 | Down | 8.59E-12  | 2.70E-11  |
| Unigene55902  | Potri.012G082100.1 | 2.9783  | 9.3205   | -1.6459 | Down | 1.49E-06  | 3.38E-06  |
| Unigene24151  | Potri.006G107900.3 | 4.6022  | 14.4025  | -1.6459 | Down | 2.84E-27  | 1.59E-26  |
| Unigene100680 | Potri.005G252600.2 | 2.8278  | 8.8494   | -1.6459 | Down | 1.49E-06  | 3.38E-06  |
| Unigene24681  | Potri.004G163200.1 | 5.6967  | 17.8276  | -1.6459 | Down | 8.59E-12  | 2.70E-11  |
| Unigene53808  | Potri.001G309800.1 | 13.2761 | 41.5474  | -1.6459 | Down | 2.84E-27  | 1.59E-26  |
| Unigene20877  | Potri.017G133700.1 | 1.1604  | 3.6316   | -1.646  | Down | 1.49E-06  | 3.38E-06  |
| Unigene40917  | Potri.006G143000.2 | 35.7747 | 111.9626 | -1.646  | Down | 4.87E-76  | 7.52E-75  |
| Unigene38280  | Potri.016G001200.1 | 21.1577 | 66.2221  | -1.6461 | Down | 2.82E-58  | 3.25E-57  |
| Unigene29378  | Potri.013G001300.1 | 13.546  | 42.3985  | -1.6461 | Down | 3.68E-53  | 3.83E-52  |
| Unigene11974  | Potri.016G049000.1 | 8.459   | 26.4792  | -1.6463 | Down | 1.14E-32  | 7.45E-32  |
| Unigene57273  | Potri.016G018100.1 | 4.0344  | 12.6296  | -1.6464 | Down | 1.61E-14  | 5.75E-14  |
| Unigene49526  | Potri.008G147100.3 | 7.3082  | 22.8781  | -1.6464 | Down | 1.55E-27  | 8.77E-27  |
| Unigene40175  | Potri.006G015200.1 | 4.4325  | 13.8756  | -1.6464 | Down | 1.61E-14  | 5.75E-14  |
| Unigene53051  | Potri.005G099800.1 | 9.4587  | 29.6102  | -1.6464 | Down | 1.61E-14  | 5.75E-14  |
| Unigene46415  | Potri.003G087600.2 | 44.1486 | 138.2052 | -1.6464 | Down | 6.09E-118 | 1.60E-116 |
| Unigene36888  | Potri.019G083700.1 | 4.2028  | 13.1592  | -1.6466 | Down | 2.56E-09  | 7.03E-09  |
| Unigene83389  | Potri.012G092500.3 | 25.0975 | 78.5778  | -1.6466 | Down | 7.09E-46  | 6.35E-45  |
| Unigene47623  | Potri.009G115800.2 | 75.1668 | 235.3618 | -1.6467 | Down | 0         | 0         |
| Unigene87102  | Potri.006G195400.1 | 23.0274 | 72.1008  | -1.6467 | Down | 1.45E-48  | 1.37E-47  |
| Unigene74332  | Potri.006G165400.1 | 22.2062 | 69.5298  | -1.6467 | Down | 6.22E-33  | 4.10E-32  |
| Unigene91386  | Potri.008G108000.1 | 92.6242 | 290.0449 | -1.6468 | Down | 1.68E-254 | 1.19E-252 |
| Unigene48073  | Potri.004G208900.1 | 14.8871 | 46.6184  | -1.6468 | Down | 3.88E-46  | 3.49E-45  |
| Unigene41530  | Potri.001G276800.1 | 7.0513  | 22.0806  | -1.6468 | Down | 8.47E-28  | 4.83E-27  |
| Unigene73251  | Potri.002G054400.1 | 41.9176 | 131.2717 | -1.6469 | Down | 2.53E-59  | 2.97E-58  |
| Unigene47873  | Potri.014G030300.1 | 10.5867 | 33.1561  | -1.647  | Down | 1.17E-22  | 5.70E-22  |
| Unigene3775   | Potri.011G043800.1 | 5.4003  | 16.913   | -1.647  | Down | 4.66E-12  | 1.48E-11  |
| Unigene40664  | Potri.005G138200.1 | 26.1481 | 81.8894  | -1.647  | Down | 1.62E-51  | 1.63E-50  |
| Unigene33005  | Potri.002G051600.1 | 1.8671  | 5.8477   | -1.6471 | Down | 4.66E-12  | 1.48E-11  |
| Unigene44450  | Potri.018G023900.1 | 2.7554  | 8.6307   | -1.6472 | Down | 8.75E-15  | 3.16E-14  |
| Unigene45056  | Potri.010G063600.1 | 11.288  | 35.3603  | -1.6473 | Down | 1.16E-46  | 1.06E-45  |
| Unigene46587  | Potri.008G185600.2 | 18.6498 | 58.419   | -1.6473 | Down | 3.70E-57  | 4.18E-56  |
| Unigene31228  | Potri.017G047600.1 | 17.256  | 54.057   | -1.6474 | Down | 1.86E-33  | 1.24E-32  |
| Unigene8611   | Potri.013G114800.1 | 5.2936  | 16.583   | -1.6474 | Down | 1.68E-17  | 6.80E-17  |
| Unigene39812  | Potri.006G142100.5 | 5.7046  | 17.8706  | -1.6474 | Down | 1.68E-17  | 6.80E-17  |
| Unigene7762   | Potri.008G075900.1 | 3.399   | 10.6486  | -1.6475 | Down | 3.26E-20  | 1.46E-19  |
| Unigene12902  | Potri.006G248700.2 | 19.3088 | 60.4908  | -1.6475 | Down | 2.79E-73  | 4.12E-72  |
| Unigene16337  | Potri.003G009000.1 | 12.488  | 39.123   | -1.6475 | Down | 3.26E-20  | 1.46E-19  |
| Unigene86204  | Potri.002G189900.1 | 10.853  | 34.0029  | -1.6476 | Down | 6.41E-23  | 3.14E-22  |

|               |                    |         |         |         |      |          |          |
|---------------|--------------------|---------|---------|---------|------|----------|----------|
| Unigene8510   | Potri.006G236600.4 | 6.5823  | 20.6245 | -1.6477 | Down | 5.06E-31 | 3.16E-30 |
| Unigene9443   | Potri.019G089700.2 | 1.3193  | 4.1348  | -1.648  | Down | 5.23E-04 | 9.25E-04 |
| Unigene64242  | Potri.008G216700.1 | 1.1015  | 3.4522  | -1.648  | Down | 7.98E-07 | 1.85E-06 |
| Unigene31447  | Potri.005G139500.1 | 1.3956  | 4.3739  | -1.648  | Down | 5.23E-04 | 9.25E-04 |
| Unigene41249  | Potri.004G082900.2 | 1.8317  | 5.7407  | -1.648  | Down | 5.23E-04 | 9.25E-04 |
| Unigene9958   | Potri.002G173300.1 | 1.3497  | 4.23    | -1.648  | Down | 5.23E-04 | 9.25E-04 |
| Unigene117618 | Potri.001G275200.1 | 1.1     | 3.4475  | -1.648  | Down | 5.23E-04 | 9.25E-04 |
| Unigene67391  | Potri.017G042200.5 | 6.3366  | 19.8599 | -1.6481 | Down | 2.53E-12 | 8.14E-12 |
| Unigene18947  | Potri.016G076400.1 | 3.7413  | 11.7258 | -1.6481 | Down | 1.38E-09 | 3.85E-09 |
| Unigene35782  | Potri.014G093700.1 | 5.0036  | 15.682  | -1.6481 | Down | 2.53E-12 | 8.14E-12 |
| Unigene63334  | Potri.014G031500.2 | 3.218   | 10.0857 | -1.6481 | Down | 7.98E-07 | 1.85E-06 |
| Unigene47457  | Potri.011G169600.1 | 1.0912  | 3.42    | -1.6481 | Down | 5.23E-04 | 9.25E-04 |
| Unigene69947  | Potri.010G036500.7 | 2.5516  | 7.9971  | -1.6481 | Down | 4.76E-15 | 1.74E-14 |
| Unigene35792  | Potri.010G030000.1 | 1.121   | 3.5135  | -1.6481 | Down | 5.23E-04 | 9.25E-04 |
| Unigene47650  | Potri.008G175300.1 | 1.2284  | 3.8501  | -1.6481 | Down | 5.23E-04 | 9.25E-04 |
| Unigene63286  | Potri.008G041800.1 | 5.0863  | 15.9412 | -1.6481 | Down | 1.38E-09 | 3.85E-09 |
| Unigene40214  | Potri.006G275100.1 | 7.9928  | 25.0505 | -1.6481 | Down | 6.92E-26 | 3.72E-25 |
| Unigene74416  | Potri.002G255900.6 | 13.3584 | 41.8674 | -1.6481 | Down | 1.78E-20 | 8.04E-20 |
| Unigene112223 | Potri.002G201300.4 | 6.8383  | 21.4321 | -1.6481 | Down | 2.53E-12 | 8.14E-12 |
| Unigene3089   | Potri.002G142700.1 | 14.1481 | 44.3423 | -1.6481 | Down | 3.88E-50 | 3.81E-49 |
| Unigene117995 | Potri.001G346000.3 | 1.0309  | 3.231   | -1.6481 | Down | 5.23E-04 | 9.25E-04 |
| Unigene581    | Potri.001G345500.1 | 15.5085 | 48.6104 | -1.6482 | Down | 5.14E-88 | 9.40E-87 |
| Unigene31068  | Potri.001G280600.1 | 18.4575 | 57.8612 | -1.6484 | Down | 6.13E-37 | 4.47E-36 |
| Unigene45556  | Potri.003G121600.1 | 11.6032 | 36.3759 | -1.6485 | Down | 9.97E-59 | 1.16E-57 |
| Unigene70231  | Potri.017G011400.2 | 4.2391  | 13.2904 | -1.6486 | Down | 5.70E-48 | 5.34E-47 |
| Unigene22429  | Potri.015G148300.2 | 18.8004 | 58.947  | -1.6487 | Down | 4.66E-78 | 7.42E-77 |
| Unigene28709  | Potri.015G013200.1 | 8.4144  | 26.3842 | -1.6487 | Down | 1.66E-34 | 1.13E-33 |
| Unigene23202  | Potri.009G068600.2 | 16.5513 | 51.9032 | -1.6489 | Down | 2.92E-70 | 4.11E-69 |
| Unigene76922  | Potri.001G368600.1 | 16.523  | 51.8178 | -1.649  | Down | 2.06E-26 | 1.13E-25 |
| Unigene18835  | Potri.002G001000.1 | 3.4185  | 10.7215 | -1.6491 | Down | 1.37E-12 | 4.48E-12 |
| Unigene14966  | Potri.008G049500.1 | 28.4624 | 89.273  | -1.6492 | Down | 1.84E-62 | 2.28E-61 |
| Unigene7957   | Potri.009G090100.1 | 8.5581  | 26.8445 | -1.6493 | Down | 4.37E-57 | 4.92E-56 |
| Unigene8129   | Potri.012G097800.1 | 3.1236  | 9.7989  | -1.6494 | Down | 7.47E-10 | 2.11E-09 |
| Unigene79309  | Potri.012G051800.1 | 5.2622  | 16.5076 | -1.6494 | Down | 7.47E-10 | 2.11E-09 |
| Unigene104457 | Potri.009G080100.1 | 2.6311  | 8.2538  | -1.6494 | Down | 7.47E-10 | 2.11E-09 |
| Unigene15644  | Potri.001G037300.3 | 20.1062 | 63.0716 | -1.6494 | Down | 4.79E-71 | 6.84E-70 |
| Unigene44469  | Potri.009G138200.1 | 4.1093  | 12.8923 | -1.6495 | Down | 5.67E-24 | 2.88E-23 |
| Unigene4357   | Potri.017G065200.2 | 16.5279 | 51.8558 | -1.6496 | Down | 5.47E-38 | 4.09E-37 |
| Unigene12798  | Potri.T023500.1    | 3.0219  | 9.4819  | -1.6497 | Down | 2.71E-35 | 1.89E-34 |

|               |                    |         |         |         |      |           |           |
|---------------|--------------------|---------|---------|---------|------|-----------|-----------|
| Unigene17238  | Potri.006G276300.1 | 3.4181  | 10.7247 | -1.6497 | Down | 1.41E-15  | 5.25E-15  |
| Unigene43864  | Potri.002G105700.9 | 2.6743  | 8.3909  | -1.6497 | Down | 1.41E-15  | 5.25E-15  |
| Unigene82785  | Potri.007G035200.1 | 22.6058 | 70.933  | -1.6498 | Down | 6.06E-41  | 4.87E-40  |
| Unigene962    | Potri.004G096300.1 | 15.4052 | 48.3416 | -1.6498 | Down | 9.65E-145 | 3.29E-143 |
| Unigene35112  | Potri.006G115000.1 | 11.6357 | 36.5143 | -1.6499 | Down | 2.07E-80  | 3.41E-79  |
| Unigene41377  | Potri.017G130200.2 | 1.2362  | 3.8796  | -1.65   | Down | 4.28E-07  | 1.02E-06  |
| Unigene17235  | Potri.010G099400.1 | 9.0304  | 28.3411 | -1.65   | Down | 6.70E-30  | 4.06E-29  |
| Unigene22413  | Potri.008G106800.2 | 3.8819  | 12.1828 | -1.65   | Down | 7.44E-13  | 2.46E-12  |
| Unigene4918   | Potri.007G053200.1 | 26.8755 | 84.3431 | -1.65   | Down | 1.28E-94  | 2.55E-93  |
| Unigene119201 | Potri.004G027700.1 | 1.3837  | 4.3426  | -1.65   | Down | 4.28E-07  | 1.02E-06  |
| Unigene67953  | Potri.001G380500.1 | 3.1774  | 9.9719  | -1.65   | Down | 7.44E-13  | 2.46E-12  |
| Unigene105771 | Potri.019G127600.1 | 1.7106  | 5.3687  | -1.6501 | Down | 7.44E-13  | 2.46E-12  |
| Unigene8853   | Potri.019G019700.1 | 27.2271 | 85.4571 | -1.6502 | Down | 3.69E-44  | 3.17E-43  |
| Unigene51250  | Potri.009G158400.2 | 8.6918  | 27.2817 | -1.6502 | Down | 7.35E-33  | 4.83E-32  |
| Unigene24498  | Potri.013G120200.1 | 3.6105  | 11.3336 | -1.6503 | Down | 8.10E-36  | 5.74E-35  |
| Unigene37121  | Potri.004G230200.1 | 9.561   | 30.0117 | -1.6503 | Down | 1.57E-21  | 7.36E-21  |
| Unigene30694  | Potri.013G112700.1 | 5.3815  | 16.8938 | -1.6504 | Down | 7.65E-16  | 2.89E-15  |
| Unigene54107  | Potri.015G066200.2 | 7.541   | 23.6743 | -1.6505 | Down | 1.69E-24  | 8.71E-24  |
| Unigene38029  | Potri.002G237500.1 | 23.8654 | 74.9216 | -1.6505 | Down | 8.95E-39  | 6.81E-38  |
| Unigene7364   | Potri.006G023400.4 | 16.0379 | 50.3549 | -1.6506 | Down | 1.10E-44  | 9.61E-44  |
| Unigene25409  | Potri.005G141500.1 | 6.2915  | 19.7537 | -1.6506 | Down | 8.03E-19  | 3.42E-18  |
| Unigene47029  | Potri.002G113600.2 | 17.5718 | 55.1676 | -1.6506 | Down | 9.92E-42  | 8.10E-41  |
| Unigene33351  | Potri.001G157300.1 | 17.441  | 54.7585 | -1.6506 | Down | 4.38E-76  | 6.77E-75  |
| Unigene42521  | Potri.006G143300.1 | 13.7947 | 43.3126 | -1.6507 | Down | 7.71E-265 | 5.74E-263 |
| Unigene12455  | Potri.019G023500.1 | 2.2825  | 7.1674  | -1.6508 | Down | 8.56E-22  | 4.04E-21  |
| Unigene6185   | Potri.001G272100.1 | 5.9226  | 18.5992 | -1.6509 | Down | 4.04E-13  | 1.35E-12  |
| Unigene8144   | Potri.001G127300.1 | 7.757   | 24.3601 | -1.6509 | Down | 9.22E-25  | 4.79E-24  |
| Unigene13569  | Potri.017G028900.1 | 4.255   | 13.3626 | -1.651  | Down | 9.22E-25  | 4.79E-24  |
| Unigene84389  | Potri.005G145000.1 | 17.4422 | 54.7849 | -1.6512 | Down | 1.20E-33  | 8.03E-33  |
| Unigene31200  | Potri.005G224900.1 | 18.8952 | 59.3525 | -1.6513 | Down | 1.46E-39  | 1.13E-38  |
| Unigene12877  | Potri.006G233000.2 | 19.8034 | 62.2111 | -1.6514 | Down | 1.18E-77  | 1.87E-76  |
| Unigene20818  | Potri.019G043400.1 | 8.8355  | 27.7591 | -1.6516 | Down | 8.88E-43  | 7.42E-42  |
| Unigene106207 | Potri.T160600.2    | 1.1779  | 3.7013  | -1.6518 | Down | 2.75E-04  | 5.03E-04  |
| Unigene14919  | Potri.T106800.4    | 1.1162  | 3.5074  | -1.6518 | Down | 2.75E-04  | 5.03E-04  |
| Unigene116137 | Potri.T022900.1    | 1.4485  | 4.5517  | -1.6518 | Down | 2.75E-04  | 5.03E-04  |
| Unigene25888  | Potri.019G030400.2 | 8.9743  | 28.2001 | -1.6518 | Down | 2.75E-25  | 1.45E-24  |
| Unigene14357  | Potri.019G015100.2 | 17.5527 | 55.1562 | -1.6518 | Down | 2.75E-25  | 1.45E-24  |
| Unigene49491  | Potri.016G048300.1 | 2.3766  | 7.468   | -1.6518 | Down | 2.19E-10  | 6.37E-10  |
| Unigene19479  | Potri.016G029700.1 | 1.3126  | 4.1246  | -1.6518 | Down | 2.75E-04  | 5.03E-04  |



|               |                    |          |          |         |      |           |           |
|---------------|--------------------|----------|----------|---------|------|-----------|-----------|
| Unigene20231  | Potri.014G044100.1 | 1.8344   | 5.7643   | -1.6518 | Down | 2.30E-07  | 5.56E-07  |
| Unigene41084  | Potri.010G144300.1 | 1.9128   | 6.0106   | -1.6518 | Down | 2.75E-04  | 5.03E-04  |
| Unigene17517  | Potri.008G014400.1 | 1.4255   | 4.4792   | -1.6518 | Down | 2.75E-04  | 5.03E-04  |
| Unigene6762   | Potri.006G003200.1 | 2.1941   | 6.8945   | -1.6518 | Down | 2.30E-07  | 5.56E-07  |
| Unigene103263 | Potri.002G114400.3 | 1.015    | 3.1893   | -1.6518 | Down | 2.75E-04  | 5.03E-04  |
| Unigene7068   | Potri.002G042800.2 | 2.4913   | 7.8283   | -1.6518 | Down | 2.19E-10  | 6.37E-10  |
| Unigene105318 | Potri.016G055100.2 | 1.3857   | 4.3544   | -1.6519 | Down | 2.30E-07  | 5.56E-07  |
| Unigene47160  | Potri.012G126000.2 | 38.7642  | 121.818  | -1.6519 | Down | 2.54E-99  | 5.41E-98  |
| Unigene117896 | Potri.012G031700.1 | 1.1447   | 3.5971   | -1.6519 | Down | 2.75E-04  | 5.03E-04  |
| Unigene42307  | Potri.009G095700.2 | 1.0058   | 3.1606   | -1.6519 | Down | 2.75E-04  | 5.03E-04  |
| Unigene116512 | Potri.008G213000.1 | 1.39     | 4.368    | -1.6519 | Down | 2.75E-04  | 5.03E-04  |
| Unigene116409 | Potri.008G147700.1 | 1.4075   | 4.4229   | -1.6519 | Down | 2.75E-04  | 5.03E-04  |
| Unigene91304  | Potri.001G153000.1 | 51.8599  | 162.968  | -1.6519 | Down | 1.75E-143 | 5.89E-142 |
| Unigene3439   | Potri.001G349300.3 | 18.9813  | 59.6527  | -1.652  | Down | 4.63E-58  | 5.31E-57  |
| Unigene40139  | Potri.013G035600.5 | 23.5665  | 74.0686  | -1.6521 | Down | 4.06E-70  | 5.71E-69  |
| Unigene8005   | Potri.006G256400.1 | 6.4018   | 20.1211  | -1.6522 | Down | 1.78E-31  | 1.13E-30  |
| Unigene23708  | Potri.009G044600.1 | 4.6624   | 14.6566  | -1.6524 | Down | 1.30E-19  | 5.70E-19  |
| Unigene29220  | Potri.006G120200.1 | 17.38    | 54.6348  | -1.6524 | Down | 1.24E-55  | 1.36E-54  |
| Unigene28317  | Potri.005G160700.1 | 16.2075  | 50.9491  | -1.6524 | Down | 1.18E-37  | 8.76E-37  |
| Unigene34246  | Potri.003G083600.4 | 2.4402   | 7.6722   | -1.6526 | Down | 1.19E-13  | 4.08E-13  |
| Unigene8199   | Potri.006G080300.1 | 4.1633   | 13.0899  | -1.6527 | Down | 1.19E-13  | 4.08E-13  |
| Unigene2689   | Potri.005G080800.2 | 4.5514   | 14.312   | -1.6528 | Down | 5.32E-32  | 3.41E-31  |
| Unigene34712  | Potri.006G185400.5 | 10.8164  | 34.0189  | -1.6531 | Down | 1.11E-56  | 1.24E-55  |
| Unigene100468 | Potri.013G032200.1 | 2.391    | 7.5218   | -1.6535 | Down | 6.46E-14  | 2.24E-13  |
| Unigene22702  | Potri.011G049400.1 | 5.6319   | 17.7175  | -1.6535 | Down | 7.12E-45  | 6.22E-44  |
| Unigene32377  | Potri.010G162700.1 | 4.4068   | 13.8635  | -1.6535 | Down | 1.59E-32  | 1.03E-31  |
| Unigene17259  | Potri.006G255300.2 | 5.2982   | 16.6677  | -1.6535 | Down | 3.86E-20  | 1.73E-19  |
| Unigene33611  | Potri.006G203500.2 | 40.155   | 126.3238 | -1.6535 | Down | 1.35E-112 | 3.35E-111 |
| Unigene43170  | Potri.010G106400.3 | 2.9169   | 9.1772   | -1.6536 | Down | 1.45E-29  | 8.70E-29  |
| Unigene928    | Potri.005G091200.3 | 10.4147  | 32.7658  | -1.6536 | Down | 5.94E-153 | 2.19E-151 |
| Unigene21996  | Potri.003G148800.1 | 30.2981  | 95.323   | -1.6536 | Down | 3.26E-122 | 8.98E-121 |
| Unigene50658  | Potri.015G019800.3 | 14.0831  | 44.3116  | -1.6537 | Down | 1.12E-60  | 1.35E-59  |
| Unigene713    | Potri.008G025800.6 | 5.0513   | 15.8939  | -1.6537 | Down | 5.77E-39  | 4.42E-38  |
| Unigene12724  | Potri.016G090000.1 | 6.2356   | 19.6215  | -1.6538 | Down | 3.50E-42  | 2.89E-41  |
| Unigene52701  | Potri.010G094300.1 | 5.5553   | 17.4801  | -1.6538 | Down | 3.65E-17  | 1.46E-16  |
| Unigene49210  | Potri.015G129500.1 | 4.6798   | 14.7263  | -1.6539 | Down | 1.33E-26  | 7.31E-26  |
| Unigene78730  | Potri.003G087800.3 | 122.8691 | 386.656  | -1.6539 | Down | 7.37E-195 | 3.72E-193 |
| Unigene30807  | Potri.001G261700.1 | 8.9271   | 28.0916  | -1.6539 | Down | 1.33E-26  | 7.31E-26  |
| Unigene99576  | Potri.016G018700.1 | 1.3855   | 4.3603   | -1.654  | Down | 6.40E-11  | 1.93E-10  |

|               |                    |         |          |         |      |           |           |
|---------------|--------------------|---------|----------|---------|------|-----------|-----------|
| Unigene53680  | Potri.009G059300.1 | 11.7139 | 36.8641  | -1.654  | Down | 2.10E-20  | 9.49E-20  |
| Unigene107666 | Potri.017G149800.1 | 32.8679 | 103.4471 | -1.6541 | Down | 1.17E-45  | 1.04E-44  |
| Unigene23455  | Potri.001G359400.1 | 18.5888 | 58.5049  | -1.6541 | Down | 5.48E-77  | 8.60E-76  |
| Unigene3834   | Potri.001G317500.2 | 12.9674 | 40.8131  | -1.6541 | Down | 1.23E-23  | 6.16E-23  |
| Unigene69740  | Potri.001G297500.1 | 3.9193  | 12.3355  | -1.6541 | Down | 1.23E-23  | 6.16E-23  |
| Unigene28984  | Potri.001G233800.7 | 5.7464  | 18.0852  | -1.6541 | Down | 1.91E-42  | 1.59E-41  |
| Unigene29175  | Potri.001G201800.1 | 11.234  | 35.3575  | -1.6541 | Down | 1.17E-45  | 1.04E-44  |
| Unigene30402  | Potri.010G153100.3 | 7.0195  | 22.0944  | -1.6542 | Down | 3.51E-14  | 1.23E-13  |
| Unigene75085  | Potri.004G051100.3 | 17.3724 | 54.6812  | -1.6542 | Down | 7.26E-27  | 4.02E-26  |
| Unigene3964   | Potri.014G169900.1 | 21.7581 | 68.4877  | -1.6543 | Down | 2.66E-55  | 2.90E-54  |
| Unigene3478   | Potri.012G043900.1 | 54.0687 | 170.1962 | -1.6543 | Down | 7.13E-87  | 1.28E-85  |
| Unigene930    | Potri.005G156900.1 | 4.5618  | 14.3587  | -1.6543 | Down | 7.26E-27  | 4.02E-26  |
| Unigene13839  | Potri.007G044400.3 | 24.8233 | 78.1418  | -1.6544 | Down | 1.70E-96  | 3.48E-95  |
| Unigene23860  | Potri.003G137400.3 | 25.2275 | 79.4116  | -1.6544 | Down | 1.71E-162 | 6.82E-161 |
| Unigene19048  | Potri.003G058500.1 | 15.3586 | 48.3512  | -1.6545 | Down | 8.95E-59  | 1.04E-57  |
| Unigene10733  | Potri.003G004800.1 | 18.9932 | 59.794   | -1.6545 | Down | 4.94E-179 | 2.23E-177 |
| Unigene30996  | Potri.002G230800.1 | 11.9257 | 37.5426  | -1.6545 | Down | 1.56E-36  | 1.13E-35  |
| Unigene29050  | Potri.001G471400.1 | 6.0429  | 19.0262  | -1.6547 | Down | 2.36E-30  | 1.45E-29  |
| Unigene42053  | Potri.008G174500.3 | 1.6578  | 5.2206   | -1.6549 | Down | 6.66E-08  | 1.67E-07  |
| Unigene20058  | Potri.017G012800.2 | 8.6203  | 27.1473  | -1.655  | Down | 1.91E-14  | 6.78E-14  |
| Unigene15947  | Potri.010G178500.1 | 1.6272  | 5.1243   | -1.655  | Down | 1.45E-04  | 2.74E-04  |
| Unigene49421  | Potri.010G135800.1 | 2.6716  | 8.4134   | -1.655  | Down | 6.66E-08  | 1.67E-07  |
| Unigene65066  | Potri.008G196400.1 | 6.0111  | 18.9302  | -1.655  | Down | 3.47E-11  | 1.06E-10  |
| Unigene24223  | Potri.005G148100.1 | 1.9832  | 6.2456   | -1.655  | Down | 6.66E-08  | 1.67E-07  |
| Unigene19687  | Potri.003G221000.1 | 1.4783  | 4.6556   | -1.655  | Down | 1.45E-04  | 2.74E-04  |
| Unigene265    | Potri.003G216800.3 | 15.244  | 48.0067  | -1.655  | Down | 8.12E-220 | 4.72E-218 |
| Unigene31078  | Potri.003G192900.4 | 7.5633  | 23.8186  | -1.655  | Down | 1.29E-30  | 7.97E-30  |
| Unigene8525   | Potri.003G130400.1 | 1.8367  | 5.7842   | -1.655  | Down | 1.45E-04  | 2.74E-04  |
| Unigene116631 | Potri.002G155700.2 | 1.4874  | 4.6842   | -1.655  | Down | 1.45E-04  | 2.74E-04  |
| Unigene22134  | Potri.002G081300.1 | 1.8794  | 5.9188   | -1.655  | Down | 1.08E-17  | 4.41E-17  |
| Unigene39832  | Potri.002G032500.8 | 2.0811  | 6.5538   | -1.655  | Down | 6.66E-08  | 1.67E-07  |
| Unigene27051  | Potri.001G376400.5 | 9.6496  | 30.3888  | -1.655  | Down | 1.91E-14  | 6.78E-14  |
| Unigene95319  | Potri.001G273400.5 | 1.2002  | 3.7798   | -1.655  | Down | 1.45E-04  | 2.74E-04  |
| Unigene50141  | Potri.001G183500.1 | 9.4347  | 29.7142  | -1.6551 | Down | 6.55E-92  | 1.26E-90  |
| Unigene34771  | Potri.005G040600.1 | 20.3452 | 64.0791  | -1.6552 | Down | 1.31E-56  | 1.46E-55  |
| Unigene33969  | Potri.002G194700.1 | 12.493  | 39.348   | -1.6552 | Down | 2.13E-53  | 2.24E-52  |
| Unigene94797  | Potri.001G389200.1 | 26.0943 | 82.1895  | -1.6552 | Down | 9.37E-44  | 8.00E-43  |
| Unigene33266  | Potri.018G032500.1 | 6.4536  | 20.3283  | -1.6553 | Down | 7.05E-31  | 4.38E-30  |
| Unigene6141   | Potri.012G089300.1 | 14.9332 | 47.0391  | -1.6553 | Down | 7.16E-57  | 8.04E-56  |

|               |                    |         |          |         |      |           |           |
|---------------|--------------------|---------|----------|---------|------|-----------|-----------|
| Unigene29783  | Potri.016G075700.2 | 4.5632  | 14.3748  | -1.6554 | Down | 2.00E-24  | 1.03E-23  |
| Unigene107276 | Potri.001G317600.1 | 34.3156 | 108.0982 | -1.6554 | Down | 3.12E-47  | 2.88E-46  |
| Unigene116270 | Potri.014G135200.1 | 7.84    | 24.6998  | -1.6556 | Down | 5.88E-18  | 2.42E-17  |
| Unigene2985   | Potri.016G114800.3 | 4.2241  | 13.3092  | -1.6557 | Down | 1.04E-14  | 3.73E-14  |
| Unigene28100  | Potri.003G166000.1 | 5.5687  | 17.5457  | -1.6557 | Down | 1.04E-14  | 3.73E-14  |
| Unigene17075  | Potri.010G169100.2 | 21.6702 | 68.2839  | -1.6558 | Down | 1.18E-57  | 1.34E-56  |
| Unigene50071  | Potri.005G046300.1 | 9.7245  | 30.6412  | -1.6558 | Down | 7.62E-38  | 5.68E-37  |
| Unigene117929 | Potri.018G013900.4 | 3.7964  | 11.9635  | -1.6559 | Down | 1.88E-11  | 5.80E-11  |
| Unigene107663 | Potri.015G048800.2 | 36.9302 | 116.3779 | -1.6559 | Down | 3.13E-51  | 3.13E-50  |
| Unigene48908  | Potri.014G190600.1 | 20.1299 | 63.4317  | -1.6559 | Down | 1.94E-77  | 3.06E-76  |
| Unigene24140  | Potri.006G275800.1 | 16.805  | 52.9563  | -1.6559 | Down | 3.29E-176 | 1.45E-174 |
| Unigene19158  | Potri.016G069100.1 | 16.0323 | 50.5253  | -1.656  | Down | 4.17E-38  | 3.12E-37  |
| Unigene18456  | Potri.018G124800.1 | 3.3726  | 10.6293  | -1.6561 | Down | 3.20E-18  | 1.33E-17  |
| Unigene1446   | Potri.015G146700.1 | 4.8259  | 15.2092  | -1.6561 | Down | 3.52E-28  | 2.03E-27  |
| Unigene24297  | Potri.006G164600.1 | 5.1016  | 16.0789  | -1.6561 | Down | 3.52E-58  | 4.05E-57  |
| Unigene34229  | Potri.001G371900.1 | 13.8984 | 43.8067  | -1.6562 | Down | 5.74E-55  | 6.19E-54  |
| Unigene16600  | Potri.002G255800.4 | 22.0525 | 69.5134  | -1.6563 | Down | 3.66E-85  | 6.45E-84  |
| Unigene107217 | Potri.001G233700.1 | 1.2018  | 3.7883   | -1.6564 | Down | 3.59E-08  | 9.17E-08  |
| Unigene20107  | Potri.001G091800.1 | 10.9071 | 34.3823  | -1.6564 | Down | 1.01E-21  | 4.77E-21  |
| Unigene34355  | Potri.008G211400.2 | 21.4685 | 67.6825  | -1.6566 | Down | 2.50E-139 | 8.11E-138 |
| Unigene71996  | Potri.008G144500.8 | 29.6577 | 93.5041  | -1.6566 | Down | 4.13E-42  | 3.40E-41  |
| Unigene43647  | Potri.006G277400.2 | 3.9755  | 12.5343  | -1.6567 | Down | 1.74E-18  | 7.33E-18  |
| Unigene90407  | Potri.012G074700.1 | 38.768  | 122.2432 | -1.6568 | Down | 8.05E-100 | 1.72E-98  |
| Unigene101675 | Potri.010G107400.1 | 1.9688  | 6.2078   | -1.6568 | Down | 1.05E-28  | 6.14E-28  |
| Unigene73704  | Potri.003G098800.2 | 7.2136  | 22.7463  | -1.6568 | Down | 1.02E-11  | 3.18E-11  |
| Unigene32511  | Potri.002G065500.1 | 7.1455  | 22.5304  | -1.6568 | Down | 6.81E-39  | 5.20E-38  |
| Unigene13525  | Potri.002G242100.1 | 20.1524 | 63.5472  | -1.6569 | Down | 1.81E-86  | 3.23E-85  |
| Unigene22379  | Potri.004G003900.1 | 15.3886 | 48.5297  | -1.657  | Down | 3.72E-39  | 2.86E-38  |
| Unigene108592 | Potri.012G021400.2 | 22.2363 | 70.1309  | -1.6571 | Down | 1.87E-32  | 1.22E-31  |
| Unigene44916  | Potri.008G159900.1 | 21.9097 | 69.099   | -1.6571 | Down | 2.25E-73  | 3.33E-72  |
| Unigene20012  | Potri.006G080100.2 | 12.0761 | 38.0868  | -1.6571 | Down | 1.87E-32  | 1.22E-31  |
| Unigene27919  | Potri.014G057400.1 | 3.9585  | 12.4864  | -1.6573 | Down | 9.65E-26  | 5.16E-25  |
| Unigene22100  | Potri.006G109600.3 | 10.7328 | 33.8541  | -1.6573 | Down | 5.89E-67  | 7.91E-66  |
| Unigene28513  | Potri.015G080400.1 | 8.3407  | 26.3109  | -1.6574 | Down | 1.02E-32  | 6.70E-32  |
| Unigene48304  | Potri.013G114600.1 | 17.8781 | 56.3979  | -1.6574 | Down | 3.37E-36  | 2.41E-35  |
| Unigene12293  | Potri.012G072200.1 | 7.171   | 22.6215  | -1.6574 | Down | 3.37E-36  | 2.41E-35  |
| Unigene34074  | Potri.009G093500.1 | 9.7418  | 30.7299  | -1.6574 | Down | 3.13E-29  | 1.86E-28  |
| Unigene34809  | Potri.016G136900.3 | 8.2746  | 26.1044  | -1.6575 | Down | 4.11E-50  | 4.03E-49  |
| Unigene21703  | Potri.012G073600.3 | 7.2939  | 23.01    | -1.6575 | Down | 3.69E-43  | 3.12E-42  |

|               |                    |         |          |         |      |           |           |
|---------------|--------------------|---------|----------|---------|------|-----------|-----------|
| Unigene44219  | Potri.006G138000.2 | 17.6645 | 55.7285  | -1.6576 | Down | 5.24E-64  | 6.68E-63  |
| Unigene52353  | Potri.019G053500.1 | 9.3583  | 29.5268  | -1.6577 | Down | 5.17E-19  | 2.22E-18  |
| Unigene7317   | Potri.016G093600.2 | 2.0162  | 6.3614   | -1.6577 | Down | 1.93E-08  | 5.03E-08  |
| Unigene103939 | Potri.016G091800.6 | 1.663   | 5.2471   | -1.6577 | Down | 7.71E-05  | 1.50E-04  |
| Unigene116047 | Potri.014G122300.1 | 1.7065  | 5.3843   | -1.6577 | Down | 7.71E-05  | 1.50E-04  |
| Unigene42690  | Potri.008G050400.1 | 7.6472  | 24.1279  | -1.6577 | Down | 2.25E-50  | 2.21E-49  |
| Unigene26183  | Potri.004G139000.1 | 1.339   | 4.2246   | -1.6577 | Down | 7.71E-05  | 1.50E-04  |
| Unigene49742  | Potri.002G151800.1 | 1.1158  | 3.5205   | -1.6577 | Down | 7.71E-05  | 1.50E-04  |
| Unigene7085   | Potri.001G166400.3 | 6.3023  | 19.8847  | -1.6577 | Down | 5.27E-26  | 2.84E-25  |
| Unigene85877  | Potri.008G064400.1 | 72.9498 | 230.1765 | -1.6578 | Down | 2.73E-144 | 9.26E-143 |
| Unigene42218  | Potri.005G108100.1 | 36.7754 | 116.0383 | -1.6578 | Down | 3.67E-106 | 8.43E-105 |
| Unigene50352  | Potri.001G399400.1 | 23.5217 | 74.2189  | -1.6578 | Down | 9.28E-96  | 1.88E-94  |
| Unigene86680  | Potri.001G073900.4 | 66.8946 | 211.0711 | -1.6578 | Down | 2.33E-137 | 7.46E-136 |
| Unigene43180  | Potri.009G075700.1 | 12.8331 | 40.4985  | -1.658  | Down | 2.41E-89  | 4.48E-88  |
| Unigene21373  | Potri.013G032100.1 | 3.1796  | 10.0353  | -1.6582 | Down | 1.82E-40  | 1.44E-39  |
| Unigene28057  | Potri.008G000600.3 | 2.5318  | 7.9909   | -1.6582 | Down | 2.82E-19  | 1.22E-18  |
| Unigene91334  | Potri.014G114700.2 | 26.8737 | 84.8247  | -1.6583 | Down | 5.45E-76  | 8.42E-75  |
| Unigene10988  | Potri.008G073100.1 | 10.8266 | 34.1741  | -1.6583 | Down | 6.34E-115 | 1.62E-113 |
| Unigene20896  | Potri.006G140700.1 | 20.443  | 64.5282  | -1.6583 | Down | 3.31E-44  | 2.85E-43  |
| Unigene45568  | Potri.005G242100.1 | 5.3285  | 16.8194  | -1.6583 | Down | 9.04E-16  | 3.40E-15  |
| Unigene77058  | Potri.002G057400.4 | 69.8756 | 220.5799 | -1.6584 | Down | 2.98E-108 | 7.04E-107 |
| Unigene12865  | Potri.001G327100.1 | 54.8311 | 173.089  | -1.6584 | Down | 0         | 0         |
| Unigene116824 | Potri.018G143100.1 | 19.2658 | 60.8209  | -1.6585 | Down | 1.81E-44  | 1.57E-43  |
| Unigene50819  | Potri.013G091700.2 | 3.1886  | 10.0663  | -1.6585 | Down | 2.99E-12  | 9.61E-12  |
| Unigene24970  | Potri.009G126000.1 | 4.277   | 13.5022  | -1.6585 | Down | 2.99E-12  | 9.61E-12  |
| Unigene108873 | Potri.008G093400.1 | 7.6375  | 24.1111  | -1.6585 | Down | 2.99E-12  | 9.61E-12  |
| Unigene39003  | Potri.008G045200.4 | 4.3702  | 13.7966  | -1.6585 | Down | 2.99E-12  | 9.61E-12  |
| Unigene38494  | Potri.008G004300.4 | 11.7072 | 36.9587  | -1.6585 | Down | 9.12E-34  | 6.13E-33  |
| Unigene12418  | Potri.004G206300.3 | 6.6759  | 21.0753  | -1.6585 | Down | 1.81E-44  | 1.57E-43  |
| Unigene43224  | Potri.008G078500.3 | 24.0878 | 76.0452  | -1.6586 | Down | 1.03E-83  | 1.78E-82  |
| Unigene13374  | Potri.001G244600.2 | 3.1032  | 9.798    | -1.6587 | Down | 8.57E-27  | 4.74E-26  |
| Unigene1612   | Potri.016G034100.1 | 9.2234  | 29.1233  | -1.6588 | Down | 2.98E-41  | 2.41E-40  |
| Unigene44890  | Potri.001G091600.1 | 4.3372  | 13.6946  | -1.6588 | Down | 4.99E-34  | 3.37E-33  |
| Unigene22870  | Potri.001G066800.1 | 10.534  | 33.2616  | -1.6588 | Down | 2.98E-41  | 2.41E-40  |
| Unigene42582  | Potri.011G090200.1 | 2.6318  | 8.3108   | -1.6589 | Down | 4.92E-16  | 1.87E-15  |
| Unigene80965  | Potri.009G036700.2 | 8.5848  | 27.1091  | -1.6589 | Down | 4.92E-16  | 1.87E-15  |
| Unigene14135  | Potri.005G182800.1 | 1.1783  | 3.7209   | -1.6589 | Down | 1.04E-08  | 2.76E-08  |
| Unigene21143  | Potri.005G027700.5 | 3.5582  | 11.236   | -1.6589 | Down | 1.04E-08  | 2.76E-08  |
| Unigene21988  | Potri.001G391900.5 | 3.8632  | 12.1991  | -1.6589 | Down | 2.66E-23  | 1.32E-22  |

|               |                    |         |          |         |      |           |           |
|---------------|--------------------|---------|----------|---------|------|-----------|-----------|
| Unigene34337  | Potri.010G070000.1 | 7.1515  | 22.5843  | -1.659  | Down | 6.07E-56  | 6.68E-55  |
| Unigene811    | Potri.003G031200.1 | 5.0863  | 16.0628  | -1.659  | Down | 4.34E-74  | 6.50E-73  |
| Unigene52679  | Potri.014G145200.2 | 23.9423 | 75.6188  | -1.6592 | Down | 5.40E-49  | 5.16E-48  |
| Unigene15917  | Potri.012G034200.1 | 11.2026 | 35.3849  | -1.6593 | Down | 1.45E-23  | 7.25E-23  |
| Unigene39523  | Potri.011G071800.1 | 4.8302  | 15.2582  | -1.6594 | Down | 4.87E-42  | 4.00E-41  |
| Unigene1225   | Potri.008G148300.1 | 6.7214  | 21.2325  | -1.6594 | Down | 4.87E-42  | 4.00E-41  |
| Unigene44349  | Potri.013G081300.6 | 19.1588 | 60.5271  | -1.6596 | Down | 2.96E-53  | 3.09E-52  |
| Unigene43241  | Potri.010G153300.2 | 5.8521  | 18.4883  | -1.6596 | Down | 1.15E-71  | 1.67E-70  |
| Unigene50111  | Potri.018G074300.1 | 5.2849  | 16.6982  | -1.6597 | Down | 1.39E-27  | 7.89E-27  |
| Unigene50639  | Potri.016G136500.2 | 4.3508  | 13.7462  | -1.6597 | Down | 7.91E-24  | 3.99E-23  |
| Unigene37857  | Potri.009G014700.2 | 22.214  | 70.1902  | -1.6598 | Down | 4.45E-35  | 3.08E-34  |
| Unigene13592  | Potri.018G051900.2 | 4.9677  | 15.6982  | -1.6599 | Down | 3.52E-76  | 5.45E-75  |
| Unigene4662   | Potri.011G077900.2 | 2.0646  | 6.5245   | -1.66   | Down | 4.09E-05  | 8.16E-05  |
| Unigene13375  | Potri.006G212600.4 | 11.6292 | 36.7514  | -1.66   | Down | 2.43E-35  | 1.70E-34  |
| Unigene28363  | Potri.002G149200.3 | 2.8473  | 8.9982   | -1.66   | Down | 5.62E-09  | 1.51E-08  |
| Unigene17244  | Potri.001G205500.2 | 2.6964  | 8.5212   | -1.66   | Down | 5.62E-09  | 1.51E-08  |
| Unigene110990 | Potri.T093800.1    | 2.4539  | 7.755    | -1.6601 | Down | 4.09E-05  | 8.16E-05  |
| Unigene31050  | Potri.T014200.2    | 1.6217  | 5.1251   | -1.6601 | Down | 4.09E-05  | 8.16E-05  |
| Unigene15754  | Potri.012G108100.3 | 1.6264  | 5.14     | -1.6601 | Down | 4.09E-05  | 8.16E-05  |
| Unigene41615  | Potri.012G063500.2 | 1.3883  | 4.3875   | -1.6601 | Down | 4.09E-05  | 8.16E-05  |
| Unigene26204  | Potri.010G067100.1 | 1.5498  | 4.8979   | -1.6601 | Down | 4.09E-05  | 8.16E-05  |
| Unigene51687  | Potri.009G108500.2 | 4.354   | 13.7599  | -1.6601 | Down | 5.62E-09  | 1.51E-08  |
| Unigene106064 | Potri.007G080100.2 | 1.8284  | 5.7783   | -1.6601 | Down | 4.09E-05  | 8.16E-05  |
| Unigene45662  | Potri.006G126200.1 | 11.4422 | 36.163   | -1.6601 | Down | 3.64E-84  | 6.31E-83  |
| Unigene29688  | Potri.005G125600.1 | 2.2114  | 6.9887   | -1.6601 | Down | 4.09E-05  | 8.16E-05  |
| Unigene43323  | Potri.016G137600.1 | 11.3653 | 35.9205  | -1.6602 | Down | 2.37E-140 | 7.77E-139 |
| Unigene49112  | Potri.016G103500.1 | 9.2356  | 29.1906  | -1.6602 | Down | 7.93E-47  | 7.25E-46  |
| Unigene46088  | Potri.018G027700.1 | 15.479  | 48.9275  | -1.6603 | Down | 2.68E-58  | 3.09E-57  |
| Unigene43511  | Potri.017G111800.3 | 7.7154  | 24.3864  | -1.6603 | Down | 2.40E-39  | 1.85E-38  |
| Unigene16687  | Potri.014G035800.3 | 18.7879 | 59.3848  | -1.6603 | Down | 1.33E-35  | 9.36E-35  |
| Unigene34031  | Potri.010G104300.1 | 6.8836  | 21.7598  | -1.6604 | Down | 4.98E-66  | 6.58E-65  |
| Unigene32726  | Potri.017G054000.1 | 10.292  | 32.5382  | -1.6606 | Down | 5.12E-74  | 7.65E-73  |
| Unigene39824  | Potri.009G162700.1 | 1.9397  | 6.1323   | -1.6606 | Down | 7.92E-17  | 3.12E-16  |
| Unigene76395  | Potri.006G109900.3 | 10.0676 | 31.8281  | -1.6606 | Down | 7.92E-17  | 3.12E-16  |
| Unigene6388   | Potri.019G091300.1 | 3.7462  | 11.845   | -1.6608 | Down | 4.77E-13  | 1.60E-12  |
| Unigene1186   | Potri.017G153900.2 | 7.8346  | 24.7717  | -1.6608 | Down | 1.51E-70  | 2.14E-69  |
| Unigene5277   | Potri.012G123400.1 | 2.6809  | 8.4766   | -1.6608 | Down | 4.77E-13  | 1.60E-12  |
| Unigene26264  | Potri.006G082300.1 | 65.878  | 208.2981 | -1.6608 | Down | 4.57E-124 | 1.28E-122 |
| Unigene20934  | Potri.005G028800.1 | 7.5585  | 23.8987  | -1.6608 | Down | 4.77E-13  | 1.60E-12  |

|               |                    |         |          |         |      |           |           |
|---------------|--------------------|---------|----------|---------|------|-----------|-----------|
| Unigene33554  | Potri.004G049400.1 | 2.6684  | 8.437    | -1.6608 | Down | 4.77E-13  | 1.60E-12  |
| Unigene50172  | Potri.012G088700.3 | 5.4564  | 17.2543  | -1.6609 | Down | 4.48E-67  | 6.02E-66  |
| Unigene36278  | Potri.010G036900.1 | 7.3832  | 23.3467  | -1.6609 | Down | 7.37E-21  | 3.38E-20  |
| Unigene18365  | Potri.005G241300.2 | 6.0784  | 19.2209  | -1.6609 | Down | 1.56E-78  | 2.50E-77  |
| Unigene1128   | Potri.019G056300.1 | 13.9454 | 44.101   | -1.661  | Down | 1.49E-136 | 4.72E-135 |
| Unigene49744  | Potri.012G144400.2 | 10.5731 | 33.4349  | -1.661  | Down | 1.24E-28  | 7.22E-28  |
| Unigene47182  | Potri.002G205900.4 | 17.2821 | 54.6519  | -1.661  | Down | 2.17E-36  | 1.56E-35  |
| Unigene56392  | Potri.017G097100.1 | 5.6404  | 17.8383  | -1.6611 | Down | 3.04E-09  | 8.28E-09  |
| Unigene21983  | Potri.015G056200.1 | 2.6581  | 8.4066   | -1.6611 | Down | 7.01E-25  | 3.65E-24  |
| Unigene50703  | Potri.014G083600.1 | 3.742   | 11.8345  | -1.6611 | Down | 4.31E-17  | 1.72E-16  |
| Unigene106742 | Potri.006G170400.2 | 1.2089  | 3.8232   | -1.6611 | Down | 4.31E-17  | 1.72E-16  |
| Unigene2619   | Potri.005G080100.2 | 2.9089  | 9.1996   | -1.6611 | Down | 4.31E-17  | 1.72E-16  |
| Unigene21416  | Potri.001G419300.1 | 8.1758  | 25.8565  | -1.6611 | Down | 7.15E-56  | 7.87E-55  |
| Unigene53798  | Potri.019G066500.1 | 13.9235 | 44.0386  | -1.6612 | Down | 6.76E-29  | 3.98E-28  |
| Unigene704    | Potri.011G124000.1 | 5.1924  | 16.4231  | -1.6613 | Down | 3.91E-56  | 4.33E-55  |
| Unigene49433  | Potri.008G066700.3 | 33.5537 | 106.1302 | -1.6613 | Down | 9.85E-107 | 2.28E-105 |
| Unigene17505  | Potri.006G059100.2 | 7.879   | 24.9239  | -1.6614 | Down | 3.82E-25  | 2.01E-24  |
| Unigene69332  | Potri.002G206000.1 | 2.0722  | 6.555    | -1.6614 | Down | 2.59E-13  | 8.77E-13  |
| Unigene13643  | Potri.002G127500.4 | 5.3177  | 16.8217  | -1.6614 | Down | 6.48E-37  | 4.72E-36  |
| Unigene45887  | Potri.015G079800.1 | 13.2015 | 41.7655  | -1.6616 | Down | 3.60E-33  | 2.38E-32  |
| Unigene100861 | Potri.012G096700.3 | 4.308   | 13.6301  | -1.6617 | Down | 2.19E-21  | 1.02E-20  |
| Unigene43387  | Potri.008G132900.1 | 9.9326  | 31.4257  | -1.6617 | Down | 6.46E-61  | 7.80E-60  |
| Unigene12962  | Potri.006G225500.1 | 7.7138  | 24.4057  | -1.6617 | Down | 2.55E-100 | 5.47E-99  |
| Unigene48863  | Potri.011G031900.4 | 11.2499 | 35.596   | -1.6618 | Down | 3.49E-53  | 3.64E-52  |
| Unigene46440  | Potri.003G109900.1 | 15.143  | 47.9131  | -1.6618 | Down | 2.09E-25  | 1.10E-24  |
| Unigene111485 | Potri.001G387600.1 | 15.208  | 48.1188  | -1.6618 | Down | 2.09E-25  | 1.10E-24  |
| Unigene3569   | Potri.001G049400.3 | 19.7155 | 62.3827  | -1.6618 | Down | 2.02E-29  | 1.20E-28  |
| Unigene27807  | Potri.018G119700.1 | 2.6822  | 8.4886   | -1.6621 | Down | 1.64E-09  | 4.54E-09  |
| Unigene35797  | Potri.017G044700.2 | 5.2814  | 16.7142  | -1.6621 | Down | 1.64E-09  | 4.54E-09  |
| Unigene627    | Potri.014G141800.3 | 15.5879 | 49.3318  | -1.6621 | Down | 1.05E-57  | 1.20E-56  |
| Unigene37518  | Potri.011G095600.1 | 1.6906  | 5.3504   | -1.6621 | Down | 1.64E-09  | 4.54E-09  |
| Unigene45523  | Potri.008G098600.3 | 2.0456  | 6.4737   | -1.6621 | Down | 1.28E-17  | 5.19E-17  |
| Unigene55958  | Potri.008G009500.1 | 5.3524  | 16.9391  | -1.6621 | Down | 1.64E-09  | 4.54E-09  |
| Unigene52605  | Potri.006G264800.1 | 5.6169  | 17.776   | -1.6621 | Down | 1.28E-17  | 5.19E-17  |
| Unigene35564  | Potri.006G118400.1 | 5.5949  | 17.7066  | -1.6621 | Down | 1.41E-13  | 4.82E-13  |
| Unigene15968  | Potri.006G081700.1 | 2.9508  | 9.3385   | -1.6621 | Down | 1.28E-17  | 5.19E-17  |
| Unigene24662  | Potri.005G203600.5 | 2.461   | 7.7885   | -1.6621 | Down | 1.64E-09  | 4.54E-09  |
| Unigene14516  | Potri.004G045300.4 | 11.7788 | 37.2771  | -1.6621 | Down | 1.14E-25  | 6.08E-25  |
| Unigene31328  | Potri.001G008800.1 | 1.1134  | 3.5237   | -1.6621 | Down | 2.18E-05  | 4.46E-05  |

|               |                    |         |          |         |      |           |           |
|---------------|--------------------|---------|----------|---------|------|-----------|-----------|
| Unigene34448  | Potri.006G085400.2 | 28.0555 | 88.7975  | -1.6622 | Down | 3.95E-110 | 9.57E-109 |
| Unigene24055  | Potri.016G064500.1 | 6.7971  | 21.5148  | -1.6623 | Down | 3.18E-62  | 3.93E-61  |
| Unigene91407  | Potri.014G136200.2 | 28.6646 | 90.7284  | -1.6623 | Down | 3.41E-82  | 5.75E-81  |
| Unigene47716  | Potri.014G017000.2 | 12.2232 | 38.6918  | -1.6624 | Down | 6.21E-26  | 3.34E-25  |
| Unigene32959  | Potri.002G009700.2 | 2.3258  | 7.3626   | -1.6625 | Down | 6.51E-22  | 3.08E-21  |
| Unigene85842  | Potri.001G403300.1 | 53.4119 | 169.0786 | -1.6625 | Down | 6.35E-107 | 1.48E-105 |
| Unigene42244  | Potri.005G116400.2 | 29.5288 | 93.4864  | -1.6626 | Down | 9.44E-59  | 1.10E-57  |
| Unigene52483  | Potri.010G104000.1 | 6.4582  | 20.4476  | -1.6627 | Down | 7.64E-14  | 2.65E-13  |
| Unigene23067  | Potri.005G253000.1 | 9.679   | 30.6476  | -1.6628 | Down | 3.55E-22  | 1.69E-21  |
| Unigene52275  | Potri.019G056800.1 | 3.0439  | 9.6385   | -1.6629 | Down | 5.11E-51  | 5.09E-50  |
| Unigene88106  | Potri.015G106000.3 | 16.8818 | 53.4574  | -1.6629 | Down | 9.45E-39  | 7.19E-38  |
| Unigene53337  | Potri.006G257900.2 | 3.5575  | 11.2658  | -1.663  | Down | 8.86E-10  | 2.49E-09  |
| Unigene6439   | Potri.005G172800.1 | 1.6634  | 5.2675   | -1.663  | Down | 8.86E-10  | 2.49E-09  |
| Unigene107906 | Potri.001G236100.4 | 12.0675 | 38.2153  | -1.663  | Down | 3.78E-18  | 1.57E-17  |
| Unigene10660  | Potri.001G047200.1 | 6.3303  | 20.0467  | -1.663  | Down | 3.33E-150 | 1.20E-148 |
| Unigene69758  | Potri.002G037000.1 | 1.7336  | 5.4901   | -1.6631 | Down | 8.86E-10  | 2.49E-09  |
| Unigene24274  | Potri.015G050800.1 | 5.7156  | 18.1043  | -1.6634 | Down | 1.42E-93  | 2.78E-92  |
| Unigene91598  | Potri.010G046500.1 | 61.0911 | 193.5087 | -1.6634 | Down | 5.36E-177 | 2.38E-175 |
| Unigene41421  | Potri.014G001000.3 | 26.5618 | 84.1454  | -1.6635 | Down | 1.39E-60  | 1.67E-59  |
| Unigene76092  | Potri.008G127900.1 | 11.1566 | 35.3415  | -1.6635 | Down | 2.06E-18  | 8.64E-18  |
| Unigene44770  | Potri.006G208600.2 | 12.1544 | 38.5033  | -1.6635 | Down | 2.52E-56  | 2.80E-55  |
| Unigene19910  | Potri.005G087500.1 | 17.4151 | 55.1671  | -1.6635 | Down | 2.86E-35  | 2.00E-34  |
| Unigene32717  | Potri.014G096000.1 | 15.0234 | 47.5959  | -1.6636 | Down | 2.36E-132 | 7.19E-131 |
| Unigene46342  | Potri.008G080900.1 | 18.4316 | 58.3978  | -1.6637 | Down | 4.59E-44  | 3.94E-43  |
| Unigene32733  | Potri.018G147400.2 | 8.4225  | 26.6858  | -1.6638 | Down | 1.37E-52  | 1.41E-51  |
| Unigene31844  | Potri.010G138900.1 | 5.8961  | 18.6821  | -1.6638 | Down | 2.20E-82  | 3.72E-81  |
| Unigene11510  | Potri.008G205600.3 | 9.0464  | 28.6626  | -1.6638 | Down | 1.37E-52  | 1.41E-51  |
| Unigene41285  | Potri.018G038300.1 | 1.4815  | 4.6945   | -1.6639 | Down | 1.16E-05  | 2.44E-05  |
| Unigene75852  | Potri.016G095900.5 | 2.8435  | 9.0101   | -1.6639 | Down | 1.16E-05  | 2.44E-05  |
| Unigene7300   | Potri.014G106300.3 | 8.4358  | 26.7307  | -1.6639 | Down | 3.01E-27  | 1.69E-26  |
| Unigene28241  | Potri.009G139900.1 | 1.7325  | 5.4898   | -1.6639 | Down | 1.12E-18  | 4.75E-18  |
| Unigene38215  | Potri.007G106700.2 | 1.6909  | 5.358    | -1.6639 | Down | 1.16E-05  | 2.44E-05  |
| Unigene74619  | Potri.005G205300.1 | 2.9356  | 9.3021   | -1.6639 | Down | 1.16E-05  | 2.44E-05  |
| Unigene19265  | Potri.002G137000.4 | 7.7644  | 24.6032  | -1.6639 | Down | 2.25E-14  | 7.98E-14  |
| Unigene21059  | Potri.001G172400.2 | 20.6769 | 65.5194  | -1.6639 | Down | 4.62E-40  | 3.63E-39  |
| Unigene21799  | Potri.018G124600.1 | 10.3636 | 32.8422  | -1.664  | Down | 2.26E-57  | 2.56E-56  |
| Unigene12759  | Potri.011G126200.3 | 22.3523 | 70.8412  | -1.6642 | Down | 1.98E-83  | 3.40E-82  |
| Unigene86631  | Potri.006G084900.3 | 10.5518 | 33.4436  | -1.6642 | Down | 3.14E-23  | 1.55E-22  |
| Unigene14918  | Potri.002G168100.3 | 19.9778 | 63.3259  | -1.6644 | Down | 4.11E-45  | 3.61E-44  |

|               |                    |         |          |         |      |           |           |
|---------------|--------------------|---------|----------|---------|------|-----------|-----------|
| Unigene113649 | Potri.016G109700.2 | 7.547   | 23.9235  | -1.6645 | Down | 1.22E-14  | 4.39E-14  |
| Unigene41394  | Potri.010G160500.1 | 17.8166 | 56.4802  | -1.6645 | Down | 1.40E-36  | 1.01E-35  |
| Unigene53685  | Potri.009G115300.1 | 7.9491  | 25.1981  | -1.6645 | Down | 1.22E-14  | 4.39E-14  |
| Unigene76246  | Potri.006G140600.1 | 23.0428 | 73.0478  | -1.6645 | Down | 1.40E-36  | 1.01E-35  |
| Unigene34170  | Potri.006G019000.1 | 3.2543  | 10.316   | -1.6645 | Down | 8.97E-28  | 5.10E-27  |
| Unigene80913  | Potri.004G041200.1 | 12.9285 | 40.9857  | -1.6646 | Down | 1.71E-23  | 8.53E-23  |
| Unigene48806  | Potri.002G141300.3 | 10.6715 | 33.8344  | -1.6647 | Down | 4.89E-28  | 2.81E-27  |
| Unigene42563  | Potri.001G078900.1 | 8.5256  | 27.0307  | -1.6647 | Down | 5.65E-72  | 8.19E-71  |
| Unigene44383  | Potri.010G121600.2 | 1.7794  | 5.6426   | -1.665  | Down | 6.65E-15  | 2.41E-14  |
| Unigene65155  | Potri.004G130300.1 | 2.7343  | 8.6707   | -1.665  | Down | 6.65E-15  | 2.41E-14  |
| Unigene32746  | Potri.016G003900.3 | 7.1446  | 22.6584  | -1.6651 | Down | 3.31E-55  | 3.59E-54  |
| Unigene66682  | Potri.014G018200.1 | 3.3397  | 10.5921  | -1.6652 | Down | 5.09E-24  | 2.58E-23  |
| Unigene38173  | Potri.001G317500.2 | 8.713   | 27.6339  | -1.6652 | Down | 5.09E-24  | 2.58E-23  |
| Unigene2630   | Potri.001G204000.1 | 7.4343  | 23.5795  | -1.6653 | Down | 5.46E-60  | 6.48E-59  |
| Unigene29705  | Potri.014G135700.2 | 2.8449  | 9.0246   | -1.6655 | Down | 6.19E-06  | 1.34E-05  |
| Unigene36079  | Potri.014G024800.8 | 2.3072  | 7.319    | -1.6655 | Down | 6.19E-06  | 1.34E-05  |
| Unigene14394  | Potri.013G148900.1 | 1.6101  | 5.1075   | -1.6655 | Down | 6.19E-06  | 1.34E-05  |
| Unigene116855 | Potri.008G144400.3 | 2.0042  | 6.3577   | -1.6655 | Down | 6.19E-06  | 1.34E-05  |
| Unigene52923  | Potri.008G094600.1 | 2.5823  | 8.1916   | -1.6655 | Down | 6.19E-06  | 1.34E-05  |
| Unigene42274  | Potri.007G033600.1 | 1.7084  | 5.4194   | -1.6655 | Down | 6.19E-06  | 1.34E-05  |
| Unigene117127 | Potri.006G249100.2 | 1.9348  | 6.1378   | -1.6655 | Down | 6.19E-06  | 1.34E-05  |
| Unigene11875  | Potri.012G024400.1 | 10.1282 | 32.1331  | -1.6657 | Down | 3.73E-38  | 2.79E-37  |
| Unigene24720  | Potri.005G226000.1 | 14.8221 | 47.029   | -1.6658 | Down | 1.51E-24  | 7.81E-24  |
| Unigene15432  | Potri.001G201800.1 | 13.3474 | 42.3521  | -1.6659 | Down | 5.37E-20  | 2.39E-19  |
| Unigene76587  | Potri.001G066800.1 | 11.995  | 38.0609  | -1.6659 | Down | 5.37E-20  | 2.39E-19  |
| Unigene13486  | Potri.017G088900.1 | 2.451   | 7.7778   | -1.666  | Down | 1.96E-15  | 7.29E-15  |
| Unigene44783  | Potri.006G112100.2 | 5.0842  | 16.1338  | -1.666  | Down | 2.38E-29  | 1.42E-28  |
| Unigene53344  | Potri.017G106800.3 | 7.8637  | 24.9583  | -1.6662 | Down | 2.93E-20  | 1.31E-19  |
| Unigene31992  | Potri.009G055400.1 | 7.9893  | 25.3556  | -1.6662 | Down | 1.81E-43  | 1.53E-42  |
| Unigene51065  | Potri.008G095700.4 | 4.585   | 14.5521  | -1.6662 | Down | 7.58E-11  | 2.27E-10  |
| Unigene8664   | Potri.001G101700.3 | 3.5846  | 11.3771  | -1.6662 | Down | 7.58E-11  | 2.27E-10  |
| Unigene51476  | Potri.011G103900.2 | 4.8198  | 15.2975  | -1.6663 | Down | 1.30E-29  | 7.79E-29  |
| Unigene38247  | Potri.004G036400.2 | 2.6438  | 8.3912   | -1.6663 | Down | 7.58E-11  | 2.27E-10  |
| Unigene45580  | Potri.003G068000.9 | 7.3247  | 23.2491  | -1.6663 | Down | 2.07E-34  | 1.41E-33  |
| Unigene851    | Potri.019G029500.1 | 8.7332  | 27.7208  | -1.6664 | Down | 2.52E-109 | 6.03E-108 |
| Unigene115414 | Potri.012G061400.1 | 19.2306 | 61.0426  | -1.6664 | Down | 3.33E-39  | 2.56E-38  |
| Unigene9353   | Potri.011G107900.3 | 37.2995 | 118.3932 | -1.6664 | Down | 7.76E-114 | 1.95E-112 |
| Unigene79044  | Potri.014G155100.1 | 46.469  | 147.5132 | -1.6665 | Down | 6.07E-77  | 9.52E-76  |
| Unigene45421  | Potri.014G133000.3 | 3.4102  | 10.8254  | -1.6665 | Down | 7.08E-30  | 4.28E-29  |



|               |                    |          |          |         |      |           |           |
|---------------|--------------------|----------|----------|---------|------|-----------|-----------|
| Unigene7603   | Potri.011G128800.1 | 3.7704   | 11.9685  | -1.6665 | Down | 1.07E-15  | 4.01E-15  |
| Unigene105523 | Potri.006G115600.2 | 1.7234   | 5.4708   | -1.6665 | Down | 1.07E-15  | 4.01E-15  |
| Unigene32737  | Potri.011G141400.1 | 6.4236   | 20.3925  | -1.6666 | Down | 3.32E-77  | 5.23E-76  |
| Unigene92731  | Potri.011G148200.6 | 47.8391  | 151.8824 | -1.6667 | Down | 1.35E-162 | 5.39E-161 |
| Unigene43424  | Potri.001G135300.3 | 4.8727   | 15.4701  | -1.6667 | Down | 3.87E-30  | 2.36E-29  |
| Unigene30679  | Potri.012G011700.2 | 13.185   | 41.8674  | -1.6669 | Down | 8.69E-21  | 3.97E-20  |
| Unigene21772  | Potri.010G016100.1 | 10.395   | 33.008   | -1.6669 | Down | 4.99E-83  | 8.52E-82  |
| Unigene89260  | Potri.009G028700.1 | 2.0191   | 6.4113   | -1.6669 | Down | 3.31E-06  | 7.31E-06  |
| Unigene53275  | Potri.006G078800.2 | 2.4187   | 7.6804   | -1.6669 | Down | 3.31E-06  | 7.31E-06  |
| Unigene40603  | Potri.005G013800.1 | 5.3486   | 16.9839  | -1.6669 | Down | 4.10E-11  | 1.25E-10  |
| Unigene19068  | Potri.004G159300.2 | 3.5553   | 11.2895  | -1.6669 | Down | 5.81E-16  | 2.20E-15  |
| Unigene3297   | Potri.003G220800.1 | 5.4655   | 17.3551  | -1.6669 | Down | 5.81E-16  | 2.20E-15  |
| Unigene114283 | Potri.002G140700.2 | 2.6543   | 8.4284   | -1.6669 | Down | 3.31E-06  | 7.31E-06  |
| Unigene58670  | Potri.001G206700.1 | 6.0229   | 19.125   | -1.6669 | Down | 5.81E-16  | 2.20E-15  |
| Unigene5308   | Potri.005G203500.1 | 1.1675   | 3.7074   | -1.667  | Down | 3.31E-06  | 7.31E-06  |
| Unigene7921   | Potri.008G206000.2 | 7.0996   | 22.5471  | -1.6671 | Down | 1.84E-35  | 1.29E-34  |
| Unigene29293  | Potri.007G019500.2 | 14.1644  | 44.9813  | -1.6671 | Down | 1.30E-54  | 1.39E-53  |
| Unigene13274  | Potri.013G077700.3 | 8.8779   | 28.1961  | -1.6672 | Down | 2.94E-74  | 4.41E-73  |
| Unigene52549  | Potri.005G192000.1 | 12.3474  | 39.2152  | -1.6672 | Down | 7.32E-26  | 3.93E-25  |
| Unigene50884  | Potri.017G091900.2 | 27.288   | 86.6702  | -1.6673 | Down | 2.69E-79  | 4.37E-78  |
| Unigene21830  | Potri.013G002100.1 | 16.8614  | 53.5541  | -1.6673 | Down | 6.42E-60  | 7.62E-59  |
| Unigene22770  | Potri.001G372800.1 | 1.5978   | 5.0751   | -1.6673 | Down | 3.16E-16  | 1.21E-15  |
| Unigene10627  | Potri.009G121200.1 | 13.9873  | 44.431   | -1.6674 | Down | 1.32E-128 | 3.86E-127 |
| Unigene7298   | Potri.008G089600.2 | 7.5642   | 24.0268  | -1.6674 | Down | 6.30E-31  | 3.92E-30  |
| Unigene40061  | Potri.005G040000.2 | 3.7044   | 11.7666  | -1.6674 | Down | 3.16E-16  | 1.21E-15  |
| Unigene48180  | Potri.001G031700.1 | 8.7942   | 27.9336  | -1.6674 | Down | 3.16E-16  | 1.21E-15  |
| Unigene33571  | Potri.006G004900.1 | 3.6007   | 11.4389  | -1.6676 | Down | 2.22E-11  | 6.84E-11  |
| Unigene29929  | Potri.004G175900.1 | 42.0776  | 133.6739 | -1.6676 | Down | 1.59E-70  | 2.25E-69  |
| Unigene60909  | Potri.001G101800.1 | 1.7074   | 5.4241   | -1.6676 | Down | 2.22E-11  | 6.84E-11  |
| Unigene92795  | Potri.016G004900.2 | 13.0475  | 41.4559  | -1.6678 | Down | 2.37E-46  | 2.14E-45  |
| Unigene46915  | Potri.004G160400.1 | 10.8944  | 34.615   | -1.6678 | Down | 1.72E-16  | 6.67E-16  |
| Unigene53930  | Potri.013G074400.1 | 8.466    | 26.9003  | -1.6679 | Down | 1.64E-36  | 1.19E-35  |
| Unigene10898  | Potri.010G082900.2 | 5.2808   | 16.7798  | -1.6679 | Down | 1.41E-21  | 6.60E-21  |
| Unigene78224  | Potri.008G053800.1 | 113.8033 | 361.6669 | -1.6681 | Down | 2.56E-182 | 1.19E-180 |
| Unigene45206  | Potri.001G205500.2 | 10.016   | 31.831   | -1.6681 | Down | 4.28E-72  | 6.22E-71  |
| Unigene15293  | Potri.014G104000.1 | 3.2576   | 10.3534  | -1.6682 | Down | 1.20E-11  | 3.76E-11  |
| Unigene5354   | Potri.012G011200.1 | 2.0081   | 6.382    | -1.6682 | Down | 1.20E-11  | 3.76E-11  |
| Unigene8879   | Potri.011G090900.1 | 2.8637   | 9.1014   | -1.6682 | Down | 1.20E-11  | 3.75E-11  |
| Unigene102990 | Potri.010G065500.3 | 1.992    | 6.3309   | -1.6682 | Down | 1.20E-11  | 3.76E-11  |

|               |                    |         |          |         |      |           |           |
|---------------|--------------------|---------|----------|---------|------|-----------|-----------|
| Unigene59841  | Potri.009G143300.2 | 1.8673  | 5.9347   | -1.6682 | Down | 1.20E-11  | 3.76E-11  |
| Unigene5377   | Potri.008G215300.2 | 8.5746  | 27.252   | -1.6682 | Down | 9.34E-17  | 3.67E-16  |
| Unigene65359  | Potri.008G174300.1 | 1.7149  | 5.4504   | -1.6682 | Down | 1.77E-06  | 4.01E-06  |
| Unigene12858  | Potri.005G139600.1 | 1.1785  | 3.7455   | -1.6682 | Down | 1.77E-06  | 4.01E-06  |
| Unigene7894   | Potri.005G065800.5 | 2.6931  | 8.5593   | -1.6682 | Down | 9.34E-17  | 3.67E-16  |
| Unigene8182   | Potri.001G095500.1 | 3.8753  | 12.3165  | -1.6682 | Down | 1.20E-11  | 3.76E-11  |
| Unigene72113  | Potri.005G257400.4 | 50.8795 | 161.7162 | -1.6683 | Down | 1.28E-72  | 1.88E-71  |
| Unigene44460  | Potri.006G127100.1 | 7.8049  | 24.808   | -1.6684 | Down | 2.12E-47  | 1.96E-46  |
| Unigene46531  | Potri.005G164700.1 | 22.2812 | 70.8215  | -1.6684 | Down | 2.12E-47  | 1.96E-46  |
| Unigene12397  | Potri.011G024000.1 | 2.0171  | 6.4125   | -1.6686 | Down | 5.08E-17  | 2.02E-16  |
| Unigene7999   | Potri.018G128700.1 | 3.54    | 11.2556  | -1.6688 | Down | 2.28E-22  | 1.09E-21  |
| Unigene96186  | Potri.006G230400.4 | 3.5237  | 11.2037  | -1.6688 | Down | 6.52E-12  | 2.06E-11  |
| Unigene382    | Potri.006G061500.4 | 18.6238 | 59.2129  | -1.6688 | Down | 3.01E-182 | 1.39E-180 |
| Unigene18088  | Potri.003G142500.1 | 4.3945  | 13.9724  | -1.6688 | Down | 2.28E-22  | 1.10E-21  |
| Unigene10549  | Potri.019G003100.1 | 7.4311  | 23.6292  | -1.6689 | Down | 1.06E-27  | 6.00E-27  |
| Unigene41709  | Potri.006G247300.7 | 3.9853  | 12.6725  | -1.6689 | Down | 1.06E-27  | 6.00E-27  |
| Unigene9441   | Potri.T081900.1    | 3.5469  | 11.279   | -1.669  | Down | 2.77E-17  | 1.11E-16  |
| Unigene44283  | Potri.005G155600.1 | 20.9104 | 66.5018  | -1.6692 | Down | 7.82E-86  | 1.39E-84  |
| Unigene13159  | Potri.011G003700.2 | 1.5511  | 4.9336   | -1.6693 | Down | 9.49E-07  | 2.19E-06  |
| Unigene31126  | Potri.004G055400.1 | 32.3951 | 103.0354 | -1.6693 | Down | 3.75E-65  | 4.88E-64  |
| Unigene318    | Potri.004G046300.1 | 12.9299 | 41.1238  | -1.6693 | Down | 4.37E-144 | 1.48E-142 |
| Unigene29842  | Potri.018G142100.2 | 2.5851  | 8.2227   | -1.6694 | Down | 9.49E-07  | 2.19E-06  |
| Unigene83401  | Potri.015G046500.5 | 8.7356  | 27.7861  | -1.6694 | Down | 1.51E-17  | 6.11E-17  |
| Unigene63113  | Potri.014G195000.1 | 2.4326  | 7.7375   | -1.6694 | Down | 9.49E-07  | 2.19E-06  |
| Unigene101918 | Potri.012G129900.1 | 2.0832  | 6.6263   | -1.6694 | Down | 9.49E-07  | 2.19E-06  |
| Unigene47984  | Potri.005G222800.2 | 2.5267  | 8.037    | -1.6694 | Down | 9.49E-07  | 2.19E-06  |
| Unigene114655 | Potri.005G025100.1 | 2.8587  | 9.093    | -1.6694 | Down | 9.49E-07  | 2.19E-06  |
| Unigene6919   | Potri.002G159900.2 | 11.2975 | 35.9348  | -1.6694 | Down | 1.49E-33  | 9.96E-33  |
| Unigene114671 | Potri.002G090900.2 | 11.4349 | 36.372   | -1.6694 | Down | 6.78E-23  | 3.32E-22  |
| Unigene49691  | Potri.002G070300.1 | 9.3471  | 29.7313  | -1.6694 | Down | 3.15E-28  | 1.81E-27  |
| Unigene10708  | Potri.001G209500.1 | 6.9848  | 22.217   | -1.6694 | Down | 7.16E-39  | 5.47E-38  |
| Unigene26824  | Potri.009G159200.2 | 85.0896 | 270.6705 | -1.6695 | Down | 3.68E-241 | 2.41E-239 |
| Unigene21548  | Potri.015G033300.1 | 9.2766  | 29.5143  | -1.6697 | Down | 8.80E-99  | 1.86E-97  |
| Unigene73420  | Potri.012G097000.2 | 26.3395 | 83.7985  | -1.6697 | Down | 2.14E-39  | 1.65E-38  |
| Unigene30038  | Potri.005G076200.2 | 23.4224 | 74.5167  | -1.6697 | Down | 2.30E-82  | 3.89E-81  |
| Unigene39259  | Potri.002G110500.1 | 31.4024 | 99.9071  | -1.6697 | Down | 1.37E-55  | 1.50E-54  |
| Unigene11570  | Potri.018G133400.1 | 12.3055 | 39.1535  | -1.6698 | Down | 1.01E-66  | 1.35E-65  |
| Unigene94518  | Potri.013G074500.1 | 18.8257 | 59.8987  | -1.6698 | Down | 9.38E-29  | 5.50E-28  |
| Unigene52027  | Potri.004G124000.2 | 8.8742  | 28.2342  | -1.6698 | Down | 8.19E-18  | 3.36E-17  |

|               |                    |         |          |         |      |           |           |
|---------------|--------------------|---------|----------|---------|------|-----------|-----------|
| Unigene34797  | Potri.006G040100.2 | 8.9649  | 28.525   | -1.6699 | Down | 1.52E-50  | 1.50E-49  |
| Unigene45175  | Potri.003G135600.1 | 9.9021  | 31.507   | -1.6699 | Down | 1.52E-50  | 1.50E-49  |
| Unigene53286  | Potri.002G163000.1 | 5.3821  | 17.1259  | -1.6699 | Down | 1.92E-12  | 6.22E-12  |
| Unigene64954  | Potri.010G245100.4 | 8.5369  | 27.1675  | -1.6701 | Down | 4.46E-18  | 1.85E-17  |
| Unigene32558  | Potri.003G153900.1 | 5.7607  | 18.3324  | -1.6701 | Down | 6.09E-62  | 7.49E-61  |
| Unigene54345  | Potri.003G090300.2 | 4.1093  | 13.0772  | -1.6701 | Down | 4.46E-18  | 1.85E-17  |
| Unigene77551  | Potri.008G152500.4 | 17.5244 | 55.7743  | -1.6702 | Down | 2.80E-29  | 1.66E-28  |
| Unigene42012  | Potri.016G137700.1 | 3.4479  | 10.975   | -1.6704 | Down | 5.09E-07  | 1.20E-06  |
| Unigene44595  | Potri.004G052400.1 | 1.4961  | 4.7621   | -1.6704 | Down | 1.04E-12  | 3.41E-12  |
| Unigene37520  | Potri.001G275500.1 | 5.8929  | 18.7579  | -1.6704 | Down | 5.99E-24  | 3.04E-23  |
| Unigene3084   | Potri.001G001700.1 | 6.8099  | 21.6767  | -1.6704 | Down | 3.97E-35  | 2.76E-34  |
| Unigene26921  | Potri.009G132800.3 | 3.5218  | 11.2105  | -1.6705 | Down | 5.09E-07  | 1.20E-06  |
| Unigene18180  | Potri.006G131300.2 | 16.2143 | 51.6153  | -1.6705 | Down | 2.99E-63  | 3.77E-62  |
| Unigene19470  | Potri.005G165500.2 | 2.6556  | 8.4532   | -1.6705 | Down | 5.09E-07  | 1.20E-06  |
| Unigene15514  | Potri.005G017000.1 | 3.688   | 11.7395  | -1.6705 | Down | 1.04E-12  | 3.41E-12  |
| Unigene99886  | Potri.004G017200.1 | 3.132   | 9.9696   | -1.6705 | Down | 5.09E-07  | 1.20E-06  |
| Unigene46794  | Potri.003G100700.1 | 3.6309  | 11.5577  | -1.6705 | Down | 5.09E-07  | 1.20E-06  |
| Unigene83375  | Potri.002G137400.2 | 6.101   | 19.4204  | -1.6705 | Down | 1.04E-12  | 3.41E-12  |
| Unigene1009   | Potri.006G017300.4 | 8.1911  | 26.0755  | -1.6706 | Down | 1.52E-46  | 1.38E-45  |
| Unigene11346  | Potri.013G069700.4 | 6.8936  | 21.9493  | -1.6708 | Down | 4.55E-30  | 2.77E-29  |
| Unigene34966  | Potri.009G155200.5 | 9.7492  | 31.0415  | -1.6708 | Down | 1.81E-58  | 2.09E-57  |
| Unigene107531 | Potri.004G102000.1 | 8.3506  | 26.5902  | -1.6709 | Down | 5.64E-13  | 1.88E-12  |
| Unigene96858  | Potri.002G207800.1 | 1.9095  | 6.0804   | -1.671  | Down | 5.64E-13  | 1.88E-12  |
| Unigene41043  | Potri.004G166600.1 | 10.4809 | 33.377   | -1.6711 | Down | 7.20E-19  | 3.07E-18  |
| Unigene168    | Potri.001G056100.1 | 19.0352 | 60.6208  | -1.6711 | Down | 1.63E-145 | 5.62E-144 |
| Unigene11917  | Potri.010G215200.9 | 4.8489  | 15.4426  | -1.6712 | Down | 9.73E-25  | 5.05E-24  |
| Unigene16770  | Potri.002G081900.1 | 12.2894 | 39.1399  | -1.6712 | Down | 1.36E-30  | 8.38E-30  |
| Unigene49798  | Potri.004G115900.1 | 21.1596 | 67.3913  | -1.6713 | Down | 3.60E-71  | 5.16E-70  |
| Unigene18213  | Potri.019G066400.1 | 2.2546  | 7.1816   | -1.6714 | Down | 3.06E-13  | 1.03E-12  |
| Unigene97434  | Potri.018G038500.1 | 3.4732  | 11.0631  | -1.6714 | Down | 2.73E-07  | 6.58E-07  |
| Unigene41613  | Potri.011G010800.1 | 12.3564 | 39.3583  | -1.6714 | Down | 1.53E-42  | 1.27E-41  |
| Unigene82030  | Potri.009G125000.1 | 59.7082 | 190.1788 | -1.6714 | Down | 2.32E-106 | 5.35E-105 |
| Unigene18856  | Potri.006G107900.1 | 1.6988  | 5.4111   | -1.6714 | Down | 2.73E-07  | 6.58E-07  |
| Unigene3838   | Potri.005G187400.1 | 17.0212 | 54.2217  | -1.6715 | Down | 8.36E-43  | 6.99E-42  |
| Unigene25714  | Potri.005G223600.1 | 31.3077 | 99.7368  | -1.6716 | Down | 9.83E-55  | 1.06E-53  |
| Unigene80581  | Potri.004G007500.1 | 69.506  | 221.4221 | -1.6716 | Down | 2.65E-119 | 7.08E-118 |
| Unigene17789  | Potri.010G217500.5 | 27.7855 | 88.5239  | -1.6717 | Down | 6.50E-67  | 8.71E-66  |
| Unigene47534  | Potri.008G041900.1 | 28.0176 | 89.2593  | -1.6717 | Down | 4.57E-43  | 3.85E-42  |
| Unigene17133  | Potri.010G090500.1 | 1.5231  | 4.8529   | -1.6718 | Down | 1.66E-13  | 5.67E-13  |

|               |                     |         |          |         |      |           |           |
|---------------|---------------------|---------|----------|---------|------|-----------|-----------|
| Unigene36148  | Potri.005G115600.1  | 15.4753 | 49.3053  | -1.6718 | Down | 2.21E-31  | 1.40E-30  |
| Unigene79917  | Potri.002G172900.1  | 43.0848 | 137.2858 | -1.6719 | Down | 1.59E-73  | 2.37E-72  |
| Unigene50097  | Potri.002G005100.1  | 5.2512  | 16.7324  | -1.6719 | Down | 1.37E-43  | 1.16E-42  |
| Unigene43349  | Potri.015G066500.1  | 4.9352  | 15.7271  | -1.6721 | Down | 8.62E-26  | 4.62E-25  |
| Unigene107128 | Potri.007G059000.1  | 9.891   | 31.52    | -1.6721 | Down | 4.05E-98  | 8.46E-97  |
| Unigene1182   | Potri.010G002000.3  | 20.8319 | 66.3902  | -1.6722 | Down | 1.47E-92  | 2.84E-91  |
| Unigene44972  | Potri.008G176000.1  | 7.9859  | 25.4506  | -1.6722 | Down | 4.09E-44  | 3.51E-43  |
| Unigene22708  | Potri.008G047700.3  | 8.7154  | 27.7751  | -1.6722 | Down | 5.16E-38  | 3.86E-37  |
| Unigene22204  | Potri.017G033300.2  | 6.6706  | 21.2604  | -1.6723 | Down | 3.61E-32  | 2.33E-31  |
| Unigene37146  | Potri.009G031500.1  | 4.0506  | 12.9102  | -1.6723 | Down | 1.47E-07  | 3.60E-07  |
| Unigene26529  | Potri.004G099500.3  | 15.8441 | 50.4982  | -1.6723 | Down | 4.70E-26  | 2.54E-25  |
| Unigene106154 | Potri.003G110300.2  | 1.4699  | 4.685    | -1.6723 | Down | 1.47E-07  | 3.60E-07  |
| Unigene53435  | Potri.001G008000.1  | 3.9964  | 12.7373  | -1.6723 | Down | 1.47E-07  | 3.60E-07  |
| Unigene88414  | Potri.T037500.1     | 16.3536 | 52.1322  | -1.6726 | Down | 8.42E-39  | 6.42E-38  |
| Unigene28245  | Potri.017G077300.2  | 18.5229 | 59.0476  | -1.6726 | Down | 8.42E-39  | 6.42E-38  |
| Unigene45736  | Potri.019G048700.3  | 4.0169  | 12.8063  | -1.6727 | Down | 4.90E-14  | 1.71E-13  |
| Unigene13101  | Potri.003G059400.2  | 2.4698  | 7.8741   | -1.6727 | Down | 4.90E-14  | 1.71E-13  |
| Unigene53898  | Potri.002G019400.3  | 12.4614 | 39.7286  | -1.6727 | Down | 4.61E-39  | 3.53E-38  |
| Unigene32802  | Potri.001G074000.1  | 3.4387  | 10.963   | -1.6727 | Down | 1.40E-26  | 7.69E-26  |
| Unigene29961  | Potri.010G001500.4  | 9.0202  | 28.76    | -1.6728 | Down | 1.88E-20  | 8.49E-20  |
| Unigene33675  | Potri.008G114800.1  | 17.5841 | 56.0679  | -1.6729 | Down | 4.80E-52  | 4.89E-51  |
| Unigene37572  | Potri.014G114300.2  | 21.614  | 68.9269  | -1.6731 | Down | 3.27E-46  | 2.95E-45  |
| Unigene24695  | Potri.011G114400.1  | 2.9324  | 9.3513   | -1.6731 | Down | 7.90E-08  | 1.97E-07  |
| Unigene53092  | Potri.011G104100.2  | 4.2579  | 13.5786  | -1.6731 | Down | 7.90E-08  | 1.97E-07  |
| Unigene43522  | Potri.007G127600.1  | 4.7657  | 15.1978  | -1.6731 | Down | 1.02E-20  | 4.67E-20  |
| Unigene12130  | Potri.005G130500.1  | 1.5287  | 4.8749   | -1.6731 | Down | 7.90E-08  | 1.97E-07  |
| Unigene6240   | Potri.003G019500.3  | 29.13   | 92.9061  | -1.6733 | Down | 1.91E-91  | 3.65E-90  |
| Unigene22106  | Potri.014G194100.1  | 6.0894  | 19.4237  | -1.6734 | Down | 3.56E-105 | 8.06E-104 |
| Unigene129    | Potri.015G013400.1  | 6.9259  | 22.0929  | -1.6735 | Down | 3.81E-86  | 6.79E-85  |
| Unigene32265  | Potri.013G058300.10 | 36.2763 | 115.7192 | -1.6735 | Down | 1.08E-280 | 8.70E-279 |
| Unigene106645 | Potri.009G040700.1  | 4.6172  | 14.7281  | -1.6735 | Down | 1.44E-14  | 5.17E-14  |
| Unigene34586  | Potri.004G143300.2  | 3.2968  | 10.5164  | -1.6735 | Down | 1.44E-14  | 5.17E-14  |
| Unigene10155  | Potri.006G017300.4  | 7.9559  | 25.3801  | -1.6736 | Down | 3.04E-21  | 1.41E-20  |
| Unigene54377  | Potri.003G220100.1  | 10.8923 | 34.747   | -1.6736 | Down | 7.05E-54  | 7.45E-53  |
| Unigene29409  | Potri.010G162000.2  | 14.1936 | 45.2824  | -1.6737 | Down | 1.56E-34  | 1.07E-33  |
| Unigene103083 | Potri.018G040900.1  | 2.0331  | 6.4869   | -1.6738 | Down | 4.25E-08  | 1.08E-07  |
| Unigene18000  | Potri.009G100100.2  | 14.7085 | 46.9265  | -1.6738 | Down | 8.77E-48  | 8.19E-47  |
| Unigene52595  | Potri.006G163600.1  | 3.1183  | 9.9494   | -1.6738 | Down | 4.25E-08  | 1.08E-07  |
| Unigene106515 | Potri.001G234300.4  | 1.2138  | 3.8727   | -1.6738 | Down | 7.85E-15  | 2.84E-14  |

|               |                    |         |          |         |      |           |           |
|---------------|--------------------|---------|----------|---------|------|-----------|-----------|
| Unigene35662  | Potri.010G094700.1 | 3.5523  | 11.3343  | -1.6739 | Down | 4.25E-08  | 1.08E-07  |
| Unigene44959  | Potri.005G174400.1 | 2.0503  | 6.5418   | -1.6739 | Down | 4.25E-08  | 1.08E-07  |
| Unigene101337 | Potri.002G133100.2 | 2.9748  | 9.4916   | -1.6739 | Down | 4.25E-08  | 1.08E-07  |
| Unigene15326  | Potri.018G090600.3 | 19.0119 | 60.668   | -1.674  | Down | 2.02E-28  | 1.17E-27  |
| Unigene25646  | Potri.017G050400.1 | 35.2788 | 112.573  | -1.674  | Down | 2.60E-108 | 6.15E-107 |
| Unigene35960  | Potri.013G008700.1 | 6.1195  | 19.5275  | -1.674  | Down | 2.02E-28  | 1.17E-27  |
| Unigene49625  | Potri.013G079000.2 | 6.8168  | 21.7554  | -1.6742 | Down | 4.26E-15  | 1.56E-14  |
| Unigene1155   | Potri.011G094100.4 | 4.6994  | 14.9978  | -1.6742 | Down | 3.29E-42  | 2.71E-41  |
| Unigene9929   | Potri.011G014800.1 | 6.2758  | 20.0288  | -1.6742 | Down | 3.29E-42  | 2.71E-41  |
| Unigene11094  | Potri.010G223300.1 | 5.9183  | 18.8875  | -1.6742 | Down | 8.29E-76  | 1.28E-74  |
| Unigene108126 | Potri.005G090800.2 | 9.6433  | 30.776   | -1.6742 | Down | 4.26E-15  | 1.56E-14  |
| Unigene1099   | Potri.010G038100.1 | 8.6536  | 27.6193  | -1.6743 | Down | 1.82E-130 | 5.43E-129 |
| Unigene14753  | Potri.019G010200.1 | 30.9678 | 98.8506  | -1.6745 | Down | 3.03E-70  | 4.28E-69  |
| Unigene39069  | Potri.010G069000.2 | 2.6023  | 8.307    | -1.6745 | Down | 2.29E-08  | 5.93E-08  |
| Unigene40862  | Potri.008G163300.2 | 16.9973 | 54.2585  | -1.6745 | Down | 3.29E-29  | 1.95E-28  |
| Unigene96228  | Potri.012G103900.1 | 1.8684  | 5.9644   | -1.6746 | Down | 2.32E-15  | 8.58E-15  |
| Unigene39220  | Potri.011G161900.1 | 1.6897  | 5.394    | -1.6746 | Down | 2.32E-15  | 8.58E-15  |
| Unigene57718  | Potri.006G142100.5 | 5.8045  | 18.5292  | -1.6746 | Down | 2.32E-15  | 8.58E-15  |
| Unigene5476   | Potri.005G223500.1 | 26.7679 | 85.4527  | -1.6746 | Down | 6.78E-64  | 8.64E-63  |
| Unigene34830  | Potri.003G110000.5 | 35.2274 | 112.4703 | -1.6748 | Down | 7.95E-162 | 3.15E-160 |
| Unigene1652   | Potri.001G230000.1 | 13.5186 | 43.1619  | -1.6748 | Down | 1.24E-36  | 8.99E-36  |
| Unigene69745  | Potri.013G070200.1 | 4.1112  | 13.1266  | -1.6749 | Down | 1.26E-15  | 4.71E-15  |
| Unigene47888  | Potri.010G107400.1 | 3.246   | 10.3642  | -1.6749 | Down | 1.26E-15  | 4.71E-15  |
| Unigene44105  | Potri.005G093300.1 | 3.7711  | 12.0408  | -1.6749 | Down | 1.26E-15  | 4.71E-15  |
| Unigene4262   | Potri.002G107700.7 | 91.4182 | 291.8974 | -1.6749 | Down | 4.59E-205 | 2.46E-203 |
| Unigene13190  | Potri.001G035500.1 | 1.8366  | 5.8641   | -1.6749 | Down | 1.26E-15  | 4.71E-15  |
| Unigene12630  | Potri.007G000700.2 | 4.7483  | 15.1619  | -1.675  | Down | 7.98E-23  | 3.89E-22  |
| Unigene5730   | Potri.019G051500.1 | 17.2247 | 55.0043  | -1.6751 | Down | 3.71E-37  | 2.72E-36  |
| Unigene4036   | Potri.015G075100.1 | 13.7506 | 43.911   | -1.6751 | Down | 2.63E-44  | 2.27E-43  |
| Unigene32268  | Potri.005G107400.1 | 8.754   | 27.9549  | -1.6751 | Down | 1.78E-136 | 5.65E-135 |
| Unigene33036  | Potri.001G346700.4 | 24.476  | 78.1624  | -1.6751 | Down | 3.05E-108 | 7.21E-107 |
| Unigene85168  | Potri.011G149300.1 | 18.2585 | 58.3107  | -1.6752 | Down | 2.03E-37  | 1.50E-36  |
| Unigene17988  | Potri.010G115700.2 | 3.5105  | 11.2113  | -1.6752 | Down | 6.85E-16  | 2.59E-15  |
| Unigene42626  | Potri.005G065100.1 | 8.8396  | 28.2314  | -1.6752 | Down | 1.21E-87  | 2.19E-86  |
| Unigene21224  | Potri.003G201200.1 | 15.4102 | 49.2137  | -1.6752 | Down | 0         | 0         |
| Unigene75234  | Potri.017G086500.1 | 47.6417 | 152.1558 | -1.6753 | Down | 2.20E-73  | 3.26E-72  |
| Unigene40145  | Potri.016G045400.2 | 4.7457  | 15.1592  | -1.6755 | Down | 3.72E-16  | 1.43E-15  |
| Unigene37410  | Potri.010G065400.1 | 10.5251 | 33.6203  | -1.6755 | Down | 3.72E-16  | 1.43E-15  |
| Unigene33740  | Potri.008G200400.1 | 3.2659  | 10.4321  | -1.6755 | Down | 3.72E-16  | 1.43E-15  |

|               |                    |         |          |         |      |           |           |
|---------------|--------------------|---------|----------|---------|------|-----------|-----------|
| Unigene17701  | Potri.008G024500.4 | 4.6933  | 14.9918  | -1.6755 | Down | 3.72E-16  | 1.43E-15  |
| Unigene32540  | Potri.003G191600.1 | 4.2637  | 13.6199  | -1.6755 | Down | 3.31E-38  | 2.49E-37  |
| Unigene30748  | Potri.018G149900.2 | 3.2978  | 10.5364  | -1.6758 | Down | 6.66E-09  | 1.78E-08  |
| Unigene12819  | Potri.012G046900.1 | 3.5272  | 11.2693  | -1.6758 | Down | 7.06E-24  | 3.56E-23  |
| Unigene106255 | Potri.011G053000.1 | 3.2003  | 10.2246  | -1.6758 | Down | 6.66E-09  | 1.78E-08  |
| Unigene26402  | Potri.001G230000.1 | 64.3383 | 205.557  | -1.6758 | Down | 4.54E-120 | 1.23E-118 |
| Unigene17580  | Potri.010G052900.1 | 38.7797 | 123.9044 | -1.6759 | Down | 2.32E-135 | 7.28E-134 |
| Unigene39933  | Potri.006G224500.4 | 13.4463 | 42.9634  | -1.6759 | Down | 5.41E-39  | 4.15E-38  |
| Unigene3044   | Potri.007G033000.1 | 1.7906  | 5.7221   | -1.6761 | Down | 1.10E-16  | 4.31E-16  |
| Unigene52006  | Potri.001G184100.3 | 17.2377 | 55.0842  | -1.6761 | Down | 6.29E-47  | 5.76E-46  |
| Unigene44427  | Potri.006G054600.1 | 23.9399 | 76.5064  | -1.6762 | Down | 6.50E-70  | 9.12E-69  |
| Unigene12326  | Potri.004G236300.2 | 19.7511 | 63.1256  | -1.6763 | Down | 1.95E-70  | 2.76E-69  |
| Unigene7457   | Potri.004G230200.1 | 1.6456  | 5.2595   | -1.6763 | Down | 3.59E-09  | 9.77E-09  |
| Unigene35959  | Potri.010G046000.3 | 10.0232 | 32.0419  | -1.6766 | Down | 1.69E-48  | 1.60E-47  |
| Unigene111343 | Potri.004G178600.9 | 9.8072  | 31.3514  | -1.6766 | Down | 3.26E-17  | 1.30E-16  |
| Unigene18686  | Potri.006G055000.3 | 19.3452 | 61.8444  | -1.6767 | Down | 6.37E-80  | 1.04E-78  |
| Unigene50188  | Potri.003G107700.2 | 4.7125  | 15.0653  | -1.6767 | Down | 7.90E-41  | 6.32E-40  |
| Unigene94502  | Potri.011G031900.1 | 4.1973  | 13.4195  | -1.6768 | Down | 5.05E-49  | 4.82E-48  |
| Unigene29035  | Potri.014G086900.1 | 2.1452  | 6.8591   | -1.6769 | Down | 1.77E-17  | 7.18E-17  |
| Unigene63484  | Potri.011G071900.1 | 5.7911  | 18.5161  | -1.6769 | Down | 1.86E-25  | 9.86E-25  |
| Unigene35999  | Potri.011G059700.1 | 4.7389  | 15.1518  | -1.6769 | Down | 1.94E-09  | 5.36E-09  |
| Unigene101999 | Potri.008G221100.1 | 1.2307  | 3.9351   | -1.6769 | Down | 1.77E-17  | 7.18E-17  |
| Unigene45108  | Potri.008G163300.1 | 9.8157  | 31.384   | -1.6769 | Down | 2.36E-41  | 1.91E-40  |
| Unigene49799  | Potri.008G131600.1 | 3.2571  | 10.4142  | -1.6769 | Down | 1.94E-09  | 5.36E-09  |
| Unigene6268   | Potri.008G130000.1 | 8.9983  | 28.7707  | -1.6769 | Down | 1.77E-17  | 7.18E-17  |
| Unigene12183  | Potri.001G273000.2 | 2.3694  | 7.5759   | -1.6769 | Down | 1.94E-09  | 5.36E-09  |
| Unigene6725   | Potri.016G053700.2 | 6.0408  | 19.3178  | -1.6771 | Down | 9.65E-18  | 3.94E-17  |
| Unigene42798  | Potri.015G146700.2 | 4.4097  | 14.1011  | -1.6771 | Down | 7.06E-42  | 5.79E-41  |
| Unigene23859  | Potri.007G123900.1 | 3.2911  | 10.5247  | -1.6771 | Down | 9.65E-18  | 3.94E-17  |
| Unigene34952  | Potri.009G031900.1 | 10.8803 | 34.7957  | -1.6772 | Down | 1.03E-90  | 1.95E-89  |
| Unigene12804  | Potri.007G003500.2 | 14.5821 | 46.6347  | -1.6772 | Down | 2.47E-50  | 2.43E-49  |
| Unigene44134  | Potri.004G223700.1 | 41.1772 | 131.6961 | -1.6773 | Down | 9.48E-116 | 2.44E-114 |
| Unigene15093  | Potri.015G139700.1 | 7.1779  | 22.958   | -1.6774 | Down | 4.81E-59  | 5.62E-58  |
| Unigene62022  | Potri.011G144900.2 | 3.4397  | 11.0017  | -1.6774 | Down | 1.05E-09  | 2.94E-09  |
| Unigene14075  | Potri.008G130400.2 | 1.7788  | 5.6894   | -1.6774 | Down | 1.05E-09  | 2.94E-09  |
| Unigene100809 | Potri.005G082000.4 | 1.4663  | 4.6899   | -1.6774 | Down | 1.05E-09  | 2.94E-09  |
| Unigene49587  | Potri.001G394400.2 | 7.6025  | 24.3159  | -1.6774 | Down | 5.25E-18  | 2.17E-17  |
| Unigene15536  | Potri.016G128700.2 | 18.0211 | 57.6439  | -1.6775 | Down | 1.00E-34  | 6.91E-34  |
| Unigene49647  | Potri.015G049100.1 | 5.9073  | 18.8958  | -1.6775 | Down | 1.44E-59  | 1.70E-58  |

|               |                    |         |          |         |      |           |           |
|---------------|--------------------|---------|----------|---------|------|-----------|-----------|
| Unigene43064  | Potri.014G017500.1 | 3.9875  | 12.7547  | -1.6775 | Down | 6.31E-43  | 5.30E-42  |
| Unigene72626  | Potri.007G105700.1 | 81.2662 | 259.942  | -1.6775 | Down | 4.68E-117 | 1.22E-115 |
| Unigene18845  | Potri.009G077600.1 | 5.1972  | 16.6254  | -1.6776 | Down | 5.49E-35  | 3.80E-34  |
| Unigene91305  | Potri.005G219800.1 | 52.9384 | 169.3589 | -1.6777 | Down | 2.45E-152 | 8.98E-151 |
| Unigene27965  | Potri.001G387400.1 | 9.4147  | 30.1195  | -1.6777 | Down | 3.00E-35  | 2.09E-34  |
| Unigene11143  | Potri.009G005300.2 | 6.9129  | 22.1164  | -1.6778 | Down | 1.29E-60  | 1.55E-59  |
| Unigene411    | Potri.005G027600.2 | 3.6096  | 11.5488  | -1.6778 | Down | 4.91E-27  | 2.73E-26  |
| Unigene82426  | Potri.006G241300.2 | 23.7231 | 75.9054  | -1.6779 | Down | 3.09E-44  | 2.66E-43  |
| Unigene43604  | Potri.001G420700.1 | 4.6452  | 14.8651  | -1.6781 | Down | 1.46E-27  | 8.27E-27  |
| Unigene10840  | Potri.001G420300.1 | 15.4126 | 49.321   | -1.6781 | Down | 1.25E-70  | 1.78E-69  |
| Unigene33408  | Potri.001G098500.1 | 6.7927  | 21.7381  | -1.6782 | Down | 5.05E-45  | 4.43E-44  |
| Unigene6575   | Potri.018G089700.4 | 7.1514  | 22.8874  | -1.6783 | Down | 7.98E-28  | 4.55E-27  |
| Unigene119209 | Potri.009G170600.3 | 2.0356  | 6.5148   | -1.6783 | Down | 3.06E-10  | 8.85E-10  |
| Unigene2945   | Potri.004G135000.5 | 1.9042  | 6.0942   | -1.6783 | Down | 3.06E-10  | 8.85E-10  |
| Unigene29472  | Potri.012G071500.1 | 9.8045  | 31.3827  | -1.6785 | Down | 1.85E-72  | 2.70E-71  |
| Unigene24219  | Potri.006G267500.1 | 8.7839  | 28.1159  | -1.6785 | Down | 8.72E-55  | 9.39E-54  |
| Unigene44043  | Potri.006G199500.1 | 7.4816  | 23.9476  | -1.6785 | Down | 4.36E-37  | 3.19E-36  |
| Unigene8971   | Potri.003G100400.1 | 9.0847  | 29.0802  | -1.6785 | Down | 2.38E-28  | 1.38E-27  |
| Unigene31368  | Potri.016G099800.1 | 1.8852  | 6.035    | -1.6786 | Down | 1.37E-19  | 6.00E-19  |
| Unigene30626  | Potri.001G161700.4 | 20.9058 | 66.9213  | -1.6786 | Down | 2.39E-37  | 1.76E-36  |
| Unigene84650  | Potri.019G130300.1 | 4.6624  | 14.9259  | -1.6787 | Down | 1.65E-10  | 4.86E-10  |
| Unigene87202  | Potri.003G215700.1 | 8.3685  | 26.7901  | -1.6787 | Down | 1.37E-19  | 6.00E-19  |
| Unigene13573  | Potri.017G018000.2 | 13.177  | 42.1887  | -1.6788 | Down | 2.52E-65  | 3.28E-64  |
| Unigene31318  | Potri.006G086900.1 | 6.1445  | 19.673   | -1.6788 | Down | 7.45E-20  | 3.30E-19  |
| Unigene19405  | Potri.002G198300.2 | 39.0704 | 125.0869 | -1.6788 | Down | 3.27E-92  | 6.31E-91  |
| Unigene2634   | Potri.017G031800.1 | 2.315   | 7.4124   | -1.6789 | Down | 3.87E-29  | 2.29E-28  |
| Unigene91117  | Potri.005G160300.1 | 45.5476 | 145.8318 | -1.6789 | Down | 4.49E-129 | 1.32E-127 |
| Unigene41499  | Potri.014G161100.1 | 3.9378  | 12.6094  | -1.679  | Down | 8.95E-11  | 2.67E-10  |
| Unigene45395  | Potri.008G168300.4 | 5.6331  | 18.0374  | -1.679  | Down | 4.13E-66  | 5.46E-65  |
| Unigene98010  | Potri.005G236000.1 | 4.9918  | 15.9844  | -1.679  | Down | 8.95E-11  | 2.67E-10  |
| Unigene87609  | Potri.001G391900.4 | 33.7918 | 108.2103 | -1.6791 | Down | 7.35E-76  | 1.13E-74  |
| Unigene20234  | Potri.009G125700.1 | 5.4676  | 17.5104  | -1.6792 | Down | 3.48E-39  | 2.67E-38  |
| Unigene53218  | Potri.001G264100.1 | 10.7199 | 34.3315  | -1.6792 | Down | 2.21E-20  | 9.97E-20  |
| Unigene46624  | Potri.007G008000.3 | 48.5128 | 155.3716 | -1.6793 | Down | 2.08E-161 | 8.20E-160 |
| Unigene51974  | Potri.003G056500.6 | 18.1564 | 58.1516  | -1.6793 | Down | 5.93E-49  | 5.66E-48  |
| Unigene11548  | Potri.001G035700.1 | 7.1625  | 22.9389  | -1.6793 | Down | 1.08E-48  | 1.03E-47  |
| Unigene50711  | Potri.018G073000.2 | 13.9685 | 44.7406  | -1.6794 | Down | 3.24E-49  | 3.11E-48  |
| Unigene41525  | Potri.009G032700.1 | 28.6664 | 91.8178  | -1.6794 | Down | 3.33E-68  | 4.55E-67  |
| Unigene20337  | Potri.006G081800.3 | 2.9637  | 9.4926   | -1.6794 | Down | 3.44E-30  | 2.10E-29  |

|               |                    |         |          |         |      |           |           |
|---------------|--------------------|---------|----------|---------|------|-----------|-----------|
| Unigene33710  | Potri.004G128600.1 | 1.0353  | 3.3161   | -1.6794 | Down | 4.85E-11  | 1.47E-10  |
| Unigene6937   | Potri.002G075800.1 | 3.8336  | 12.2788  | -1.6794 | Down | 1.21E-20  | 5.48E-20  |
| Unigene47074  | Potri.001G399400.3 | 28.9235 | 92.6375  | -1.6794 | Down | 1.88E-58  | 2.18E-57  |
| Unigene2500   | Potri.018G003700.2 | 26.6018 | 85.2111  | -1.6795 | Down | 1.94E-97  | 4.01E-96  |
| Unigene31982  | Potri.007G041000.1 | 15.3951 | 49.3131  | -1.6795 | Down | 2.15E-116 | 5.57E-115 |
| Unigene9228   | Potri.001G455300.3 | 1.3321  | 4.2668   | -1.6795 | Down | 4.85E-11  | 1.47E-10  |
| Unigene50165  | Potri.009G055200.1 | 5.0218  | 16.0865  | -1.6796 | Down | 5.46E-69  | 7.56E-68  |
| Unigene63354  | Potri.005G033700.2 | 8.5289  | 27.321   | -1.6796 | Down | 6.57E-21  | 3.01E-20  |
| Unigene48654  | Potri.003G098800.2 | 23.2501 | 74.4766  | -1.6796 | Down | 9.70E-50  | 9.42E-49  |
| Unigene18654  | Potri.001G151700.4 | 5.9521  | 19.0666  | -1.6796 | Down | 6.57E-21  | 3.01E-20  |
| Unigene11969  | Potri.008G200800.2 | 10.9503 | 35.0852  | -1.6799 | Down | 4.75E-51  | 4.74E-50  |
| Unigene83420  | Potri.002G059700.2 | 37.2995 | 119.5099 | -1.6799 | Down | 8.05E-71  | 1.15E-69  |
| Unigene2768   | Potri.016G093500.1 | 16.8674 | 54.0486  | -1.68   | Down | 1.42E-51  | 1.44E-50  |
| Unigene5404   | Potri.001G277800.2 | 38.5808 | 123.6232 | -1.68   | Down | 2.41E-71  | 3.47E-70  |
| Unigene4259   | Potri.012G055800.4 | 6.5232  | 20.9035  | -1.6801 | Down | 1.42E-11  | 4.42E-11  |
| Unigene15424  | Potri.009G167000.1 | 28.6146 | 91.6971  | -1.6801 | Down | 3.89E-82  | 6.55E-81  |
| Unigene29211  | Potri.008G075900.1 | 2.7165  | 8.7049   | -1.6801 | Down | 1.06E-21  | 5.01E-21  |
| Unigene7942   | Potri.006G054600.1 | 13.2912 | 42.5907  | -1.6801 | Down | 1.29E-131 | 3.89E-130 |
| Unigene9499   | Potri.003G137900.1 | 4.5889  | 14.705   | -1.6801 | Down | 1.42E-11  | 4.42E-11  |
| Unigene21958  | Potri.015G103400.3 | 12.8422 | 41.1546  | -1.6802 | Down | 4.54E-42  | 3.74E-41  |
| Unigene31551  | Potri.013G068100.1 | 6.5152  | 20.8823  | -1.6804 | Down | 7.70E-12  | 2.42E-11  |
| Unigene21569  | Potri.006G196200.1 | 9.9328  | 31.8373  | -1.6804 | Down | 1.10E-63  | 1.39E-62  |
| Unigene2786   | Potri.006G080300.1 | 5.0235  | 16.1011  | -1.6804 | Down | 1.49E-32  | 9.69E-32  |
| Unigene29114  | Potri.004G163300.1 | 39.6672 | 127.1361 | -1.6804 | Down | 3.00E-298 | 2.64E-296 |
| Unigene21562  | Potri.018G108000.1 | 3.4011  | 10.9018  | -1.6805 | Down | 8.12E-33  | 5.33E-32  |
| Unigene46086  | Potri.006G248100.1 | 34.562  | 110.7858 | -1.6805 | Down | 1.53E-105 | 3.49E-104 |
| Unigene14999  | Potri.006G241300.3 | 14.8831 | 47.7076  | -1.6805 | Down | 1.72E-22  | 8.31E-22  |
| Unigene103281 | Potri.019G080900.1 | 2.8502  | 9.1364   | -1.6806 | Down | 1.72E-22  | 8.31E-22  |
| Unigene392    | Potri.015G014800.2 | 10.5275 | 33.7468  | -1.6806 | Down | 7.00E-148 | 2.46E-146 |
| Unigene22915  | Potri.004G176600.1 | 10.7007 | 34.3033  | -1.6806 | Down | 9.85E-65  | 1.27E-63  |
| Unigene47059  | Potri.007G132100.2 | 2.4947  | 7.9977   | -1.6807 | Down | 4.17E-12  | 1.33E-11  |
| Unigene24443  | Potri.006G148400.1 | 3.3834  | 10.8464  | -1.6807 | Down | 2.42E-33  | 1.61E-32  |
| Unigene14053  | Potri.018G128000.3 | 33.368  | 106.9795 | -1.6808 | Down | 7.64E-87  | 1.37E-85  |
| Unigene42682  | Potri.009G070000.1 | 4.855   | 15.5667  | -1.6809 | Down | 1.08E-44  | 9.45E-44  |
| Unigene54536  | Potri.005G122500.1 | 7.8229  | 25.082   | -1.6809 | Down | 7.23E-34  | 4.87E-33  |
| Unigene10717  | Potri.001G465500.1 | 4.4663  | 14.3199  | -1.6809 | Down | 2.29E-87  | 4.15E-86  |
| Unigene42998  | Potri.008G167800.1 | 3.4355  | 11.0157  | -1.681  | Down | 2.79E-23  | 1.38E-22  |
| Unigene20907  | Potri.005G179500.1 | 1.973   | 6.3264   | -1.681  | Down | 2.26E-12  | 7.30E-12  |
| Unigene116616 | Potri.003G077600.1 | 4.8202  | 15.4558  | -1.681  | Down | 2.26E-12  | 7.31E-12  |



|               |                    |          |          |         |      |           |           |
|---------------|--------------------|----------|----------|---------|------|-----------|-----------|
| Unigene62246  | Potri.001G312900.5 | 1.8195   | 5.8341   | -1.681  | Down | 2.26E-12  | 7.30E-12  |
| Unigene85044  | Potri.016G019000.1 | 39.0069  | 125.0835 | -1.6811 | Down | 3.82E-78  | 6.09E-77  |
| Unigene1774   | Potri.013G003200.1 | 11.513   | 36.9211  | -1.6812 | Down | 9.70E-46  | 8.65E-45  |
| Unigene34654  | Potri.001G262600.1 | 3.3189   | 10.6445  | -1.6813 | Down | 3.52E-35  | 2.45E-34  |
| Unigene85464  | Potri.T161200.1    | 158.1036 | 507.1123 | -1.6814 | Down | 0         | 0         |
| Unigene18651  | Potri.006G236700.1 | 19.1325  | 61.3652  | -1.6814 | Down | 7.39E-58  | 8.44E-57  |
| Unigene22645  | Potri.001G078400.1 | 4.4698   | 14.336   | -1.6814 | Down | 4.52E-24  | 2.30E-23  |
| Unigene30274  | Potri.011G002500.1 | 6.8669   | 22.0262  | -1.6815 | Down | 6.65E-13  | 2.20E-12  |
| Unigene18804  | Potri.007G067500.1 | 3.3088   | 10.6134  | -1.6815 | Down | 6.65E-13  | 2.20E-12  |
| Unigene15645  | Potri.002G106800.1 | 7.3596   | 23.6066  | -1.6815 | Down | 6.65E-13  | 2.20E-12  |
| Unigene42662  | Potri.010G228600.1 | 9.1953   | 29.4965  | -1.6816 | Down | 1.34E-138 | 4.32E-137 |
| Unigene89162  | Potri.010G131400.3 | 23.8332  | 76.4555  | -1.6816 | Down | 3.63E-59  | 4.25E-58  |
| Unigene6874   | Potri.012G036300.1 | 10.4978  | 33.6772  | -1.6817 | Down | 7.77E-48  | 7.26E-47  |
| Unigene18661  | Potri.010G237900.1 | 7.7707   | 24.9297  | -1.6817 | Down | 7.34E-25  | 3.83E-24  |
| Unigene80435  | Potri.014G140900.1 | 40.7588  | 130.764  | -1.6818 | Down | 1.55E-71  | 2.23E-70  |
| Unigene1026   | Potri.013G000600.1 | 4.887    | 15.6792  | -1.6818 | Down | 9.38E-37  | 6.81E-36  |
| Unigene17986  | Potri.002G119800.1 | 3.5041   | 11.2418  | -1.6818 | Down | 3.61E-13  | 1.21E-12  |
| Unigene52419  | Potri.012G034800.1 | 7.2372   | 23.22    | -1.6819 | Down | 4.01E-25  | 2.10E-24  |
| Unigene10620  | Potri.018G107600.1 | 9.9808   | 32.0258  | -1.682  | Down | 8.89E-97  | 1.82E-95  |
| Unigene38626  | Potri.014G135200.1 | 11.6509  | 37.3858  | -1.682  | Down | 1.53E-37  | 1.13E-36  |
| Unigene87404  | Potri.006G146400.5 | 16.4592  | 52.8148  | -1.682  | Down | 1.53E-37  | 1.13E-36  |
| Unigene111545 | Potri.003G015300.1 | 21.9972  | 70.5817  | -1.682  | Down | 2.80E-37  | 2.06E-36  |
| Unigene20599  | Potri.002G160900.4 | 4.8468   | 15.5519  | -1.682  | Down | 1.96E-13  | 6.66E-13  |
| Unigene25402  | Potri.014G093400.1 | 1.861    | 5.9723   | -1.6822 | Down | 1.06E-13  | 3.66E-13  |
| Unigene34943  | Potri.013G128100.1 | 6.848    | 21.9763  | -1.6822 | Down | 3.41E-50  | 3.34E-49  |
| Unigene12675  | Potri.008G048900.1 | 15.3779  | 49.3503  | -1.6822 | Down | 4.57E-38  | 3.43E-37  |
| Unigene7673   | Potri.008G036500.1 | 2.3949   | 7.6857   | -1.6822 | Down | 1.06E-13  | 3.66E-13  |
| Unigene109018 | Potri.005G154000.1 | 8.3084   | 26.6632  | -1.6822 | Down | 1.06E-13  | 3.66E-13  |
| Unigene49425  | Potri.005G003300.1 | 5.4275   | 17.4177  | -1.6822 | Down | 1.06E-13  | 3.66E-13  |
| Unigene43050  | Potri.002G143000.1 | 7.6055   | 24.4075  | -1.6822 | Down | 6.51E-26  | 3.50E-25  |
| Unigene87194  | Potri.014G159300.4 | 17.2152  | 55.2547  | -1.6824 | Down | 7.47E-39  | 5.70E-38  |
| Unigene3334   | Potri.011G006800.1 | 4.8652   | 15.6154  | -1.6824 | Down | 5.77E-14  | 2.01E-13  |
| Unigene33213  | Potri.004G173700.2 | 8.9053   | 28.5817  | -1.6824 | Down | 5.58E-51  | 5.56E-50  |
| Unigene101956 | Potri.002G021900.1 | 2.5324   | 8.128    | -1.6824 | Down | 5.77E-14  | 2.01E-13  |
| Unigene16675  | Potri.016G116300.2 | 7.5524   | 24.244   | -1.6826 | Down | 3.13E-14  | 1.10E-13  |
| Unigene36518  | Potri.013G153400.1 | 39.6163  | 127.17   | -1.6826 | Down | 6.53E-90  | 1.22E-88  |
| Unigene5604   | Potri.006G262200.1 | 31.4348  | 100.9053 | -1.6826 | Down | 7.74E-140 | 2.53E-138 |
| Unigene6455   | Potri.006G242400.1 | 3.0978   | 9.9441   | -1.6826 | Down | 3.13E-14  | 1.10E-13  |
| Unigene38711  | Potri.004G228700.1 | 8.9226   | 28.6418  | -1.6826 | Down | 1.16E-64  | 1.49E-63  |

|               |                     |         |          |         |      |           |           |
|---------------|---------------------|---------|----------|---------|------|-----------|-----------|
| Unigene94674  | Potri.018G025600.2  | 1.3042  | 4.1871   | -1.6828 | Down | 1.70E-14  | 6.06E-14  |
| Unigene45607  | Potri.012G118100.3  | 1.6446  | 5.2801   | -1.6828 | Down | 1.70E-14  | 6.06E-14  |
| Unigene22669  | Potri.005G220300.1  | 2.5     | 8.0263   | -1.6828 | Down | 1.70E-14  | 6.06E-14  |
| Unigene6357   | Potri.004G001600.1  | 22.0256 | 70.7117  | -1.6828 | Down | 4.48E-53  | 4.66E-52  |
| Unigene118329 | Potri.001G005100.1  | 4.3574  | 13.9897  | -1.6828 | Down | 1.70E-14  | 6.06E-14  |
| Unigene37255  | Potri.012G011700.2  | 11.5698 | 37.1465  | -1.6829 | Down | 1.34E-53  | 1.41E-52  |
| Unigene13584  | Potri.001G361900.1  | 4.8144  | 15.4597  | -1.6831 | Down | 6.58E-55  | 7.09E-54  |
| Unigene2778   | Potri.017G044700.2  | 19.4315 | 62.4034  | -1.6832 | Down | 4.12E-69  | 5.71E-68  |
| Unigene40112  | Potri.002G022100.1  | 3.3499  | 10.7577  | -1.6832 | Down | 5.02E-15  | 1.83E-14  |
| Unigene39674  | Potri.001G220100.1  | 12.6061 | 40.4861  | -1.6833 | Down | 2.64E-83  | 4.52E-82  |
| Unigene17997  | Potri.016G061700.2  | 8.1617  | 26.2149  | -1.6834 | Down | 2.48E-29  | 1.48E-28  |
| Unigene19251  | Potri.014G111900.1  | 21.1893 | 68.0583  | -1.6834 | Down | 1.11E-70  | 1.58E-69  |
| Unigene28677  | Potri.001G161900.1  | 5.9634  | 19.1531  | -1.6834 | Down | 4.55E-29  | 2.69E-28  |
| Unigene8831   | Potri.003G194400.2  | 24.8356 | 79.7736  | -1.6835 | Down | 3.32E-71  | 4.76E-70  |
| Unigene7362   | Potri.009G133100.1  | 4.8961  | 15.7288  | -1.6837 | Down | 8.06E-16  | 3.04E-15  |
| Unigene23061  | Potri.003G169200.2  | 4.2803  | 13.7519  | -1.6838 | Down | 4.38E-16  | 1.67E-15  |
| Unigene8544   | Potri.004G043200.5  | 27.0723 | 86.9815  | -1.6839 | Down | 6.97E-60  | 8.28E-59  |
| Unigene46105  | Potri.014G197600.2  | 8.2406  | 26.4786  | -1.684  | Down | 2.38E-16  | 9.21E-16  |
| Unigene107368 | Potri.014G035800.3  | 21.2607 | 68.3148  | -1.684  | Down | 3.59E-31  | 2.25E-30  |
| Unigene47385  | Potri.012G091900.1  | 50.1963 | 161.2857 | -1.684  | Down | 2.74E-104 | 6.16E-103 |
| Unigene37487  | Potri.010G146400.1  | 5.7153  | 18.3642  | -1.684  | Down | 2.38E-16  | 9.21E-16  |
| Unigene11678  | Potri.007G040900.3  | 4.1852  | 13.4478  | -1.684  | Down | 6.23E-46  | 5.58E-45  |
| Unigene4869   | Potri.004G125000.10 | 30.4568 | 97.8611  | -1.684  | Down | 2.09E-60  | 2.50E-59  |
| Unigene51984  | Potri.009G150400.1  | 7.4092  | 23.8109  | -1.6842 | Down | 5.85E-32  | 3.75E-31  |
| Unigene41019  | Potri.016G075200.4  | 10.0031 | 32.1482  | -1.6843 | Down | 7.05E-17  | 2.78E-16  |
| Unigene37778  | Potri.015G048800.2  | 11.1342 | 35.7868  | -1.6844 | Down | 3.84E-17  | 1.53E-16  |
| Unigene102551 | Potri.009G024600.4  | 1.943   | 6.2457   | -1.6846 | Down | 2.09E-17  | 8.42E-17  |
| Unigene8554   | Potri.006G053900.2  | 4.4266  | 14.229   | -1.6846 | Down | 2.09E-17  | 8.42E-17  |
| Unigene21981  | Potri.005G215800.1  | 13.121  | 42.1802  | -1.6847 | Down | 6.66E-66  | 8.79E-65  |
| Unigene540    | Potri.003G197600.1  | 1.7913  | 5.7585   | -1.6847 | Down | 1.14E-17  | 4.63E-17  |
| Unigene1144   | Potri.010G070200.1  | 4.237   | 13.6217  | -1.6848 | Down | 2.19E-50  | 2.15E-49  |
| Unigene32043  | Potri.010G034300.1  | 37.0262 | 119.0408 | -1.6848 | Down | 1.20E-246 | 8.12E-245 |
| Unigene42524  | Potri.003G000500.5  | 7.1182  | 22.8841  | -1.6848 | Down | 4.64E-34  | 3.14E-33  |
| Unigene112619 | Potri.002G027100.1  | 9.7436  | 31.3281  | -1.6849 | Down | 3.36E-18  | 1.40E-17  |
| Unigene37930  | Potri.004G049400.1  | 12.1851 | 39.1831  | -1.6851 | Down | 1.23E-35  | 8.71E-35  |
| Unigene112640 | Potri.008G086300.4  | 20.2483 | 65.1164  | -1.6852 | Down | 3.69E-36  | 2.64E-35  |
| Unigene6589   | Potri.017G032200.1  | 3.116   | 10.0212  | -1.6853 | Down | 5.43E-19  | 2.33E-18  |
| Unigene21828  | Potri.004G211400.2  | 4.2315  | 13.6089  | -1.6853 | Down | 1.10E-36  | 7.98E-36  |
| Unigene31634  | Potri.001G361100.1  | 23.0413 | 74.103   | -1.6853 | Down | 4.71E-54  | 4.99E-53  |

|               |                    |          |           |         |      |           |           |
|---------------|--------------------|----------|-----------|---------|------|-----------|-----------|
| Unigene34329  | Potri.012G000400.1 | 11.0064  | 35.4004   | -1.6854 | Down | 2.69E-90  | 5.06E-89  |
| Unigene19108  | Potri.009G136400.7 | 28.2489  | 90.8599   | -1.6854 | Down | 4.22E-55  | 4.57E-54  |
| Unigene1743   | Potri.006G236700.1 | 14.5701  | 46.8637   | -1.6855 | Down | 5.75E-73  | 8.45E-72  |
| Unigene30978  | Potri.003G139300.1 | 9.712    | 31.2383   | -1.6855 | Down | 1.61E-19  | 7.04E-19  |
| Unigene43346  | Potri.010G043200.5 | 6.3556   | 20.4447   | -1.6856 | Down | 8.48E-75  | 1.29E-73  |
| Unigene88432  | Potri.004G158900.1 | 15.7935  | 50.8047   | -1.6856 | Down | 2.93E-38  | 2.21E-37  |
| Unigene26729  | Potri.006G130900.2 | 417.2315 | 1342.1859 | -1.6857 | Down | 0         | 0         |
| Unigene28402  | Potri.003G009500.1 | 7.7435   | 24.9101   | -1.6857 | Down | 4.77E-20  | 2.13E-19  |
| Unigene7535   | Potri.018G020600.1 | 23.4869  | 75.5644   | -1.6859 | Down | 6.20E-115 | 1.58E-113 |
| Unigene50205  | Potri.010G254200.1 | 5.2519   | 16.8978   | -1.6859 | Down | 7.83E-40  | 6.12E-39  |
| Unigene11096  | Potri.008G181000.1 | 2.0565   | 6.6166    | -1.6859 | Down | 1.42E-20  | 6.43E-20  |
| Unigene7504   | Potri.006G131100.1 | 3.578    | 11.5117   | -1.6859 | Down | 1.42E-20  | 6.43E-20  |
| Unigene16935  | Potri.003G128800.1 | 42.4343  | 136.5253  | -1.6859 | Down | 3.40E-115 | 8.70E-114 |
| Unigene42596  | Potri.016G002100.1 | 12.5552  | 40.3975   | -1.686  | Down | 2.76E-117 | 7.21E-116 |
| Unigene29200  | Potri.013G064300.3 | 7.9467   | 25.5689   | -1.686  | Down | 2.73E-59  | 3.21E-58  |
| Unigene45687  | Potri.010G220300.2 | 2.3136   | 7.4442    | -1.686  | Down | 7.72E-21  | 3.53E-20  |
| Unigene40261  | Potri.006G120200.1 | 4.5027   | 14.4877   | -1.686  | Down | 7.72E-21  | 3.53E-20  |
| Unigene50027  | Potri.005G083700.1 | 3.0978   | 9.9674    | -1.686  | Down | 7.72E-21  | 3.53E-20  |
| Unigene1998   | Potri.001G139400.3 | 18.8382  | 60.6161   | -1.686  | Down | 1.66E-79  | 2.71E-78  |
| Unigene24390  | Potri.012G003500.1 | 13.4989  | 43.4383   | -1.6861 | Down | 3.14E-100 | 6.74E-99  |
| Unigene89870  | Potri.008G083500.1 | 23.9855  | 77.195    | -1.6863 | Down | 5.91E-63  | 7.40E-62  |
| Unigene16313  | Potri.015G084000.3 | 11.0517  | 35.5713   | -1.6864 | Down | 2.02E-22  | 9.74E-22  |
| Unigene55073  | Potri.009G119300.1 | 9.5523   | 30.7515   | -1.6867 | Down | 1.79E-23  | 8.90E-23  |
| Unigene32129  | Potri.008G012100.1 | 14.1077  | 45.4169   | -1.6867 | Down | 3.51E-89  | 6.51E-88  |
| Unigene13728  | Potri.008G002300.2 | 7.7592   | 24.9793   | -1.6868 | Down | 3.51E-89  | 6.51E-88  |
| Unigene14862  | Potri.007G005600.1 | 8.1086   | 26.105    | -1.6868 | Down | 9.75E-24  | 4.90E-23  |
| Unigene48522  | Potri.015G092900.2 | 13.3102  | 42.8531   | -1.6869 | Down | 5.32E-24  | 2.70E-23  |
| Unigene48853  | Potri.006G125400.4 | 7.4771   | 24.0741   | -1.6869 | Down | 2.90E-24  | 1.48E-23  |
| Unigene2077   | Potri.014G180700.1 | 17.4862  | 56.3023   | -1.687  | Down | 5.09E-70  | 7.15E-69  |
| Unigene32334  | Potri.003G059200.1 | 4.7025   | 15.1414   | -1.687  | Down | 1.96E-47  | 1.81E-46  |
| Unigene92539  | Potri.002G183400.4 | 75.9092  | 244.4323  | -1.6871 | Down | 4.50E-257 | 3.23E-255 |
| Unigene27808  | Potri.013G093400.2 | 14.8065  | 47.6818   | -1.6872 | Down | 2.86E-49  | 2.75E-48  |
| Unigene11827  | Potri.002G110500.1 | 29.3883  | 94.6383   | -1.6872 | Down | 0         | 0         |
| Unigene80862  | Potri.015G117300.2 | 13.8202  | 44.5079   | -1.6873 | Down | 7.64E-26  | 4.10E-25  |
| Unigene112778 | Potri.001G465600.1 | 14.2527  | 45.9026   | -1.6873 | Down | 4.17E-26  | 2.26E-25  |
| Unigene25896  | Potri.001G015900.1 | 13.4452  | 43.3003   | -1.6873 | Down | 7.64E-26  | 4.10E-25  |
| Unigene4503   | Potri.005G120800.2 | 5.4869   | 17.6714   | -1.6874 | Down | 4.17E-26  | 2.26E-25  |
| Unigene93192  | Potri.003G081400.1 | 6.4451   | 20.7574   | -1.6874 | Down | 4.17E-26  | 2.26E-25  |
| Unigene34178  | Potri.002G245800.2 | 8.2937   | 26.7113   | -1.6874 | Down | 7.68E-51  | 7.62E-50  |

|              |                    |          |          |         |      |           |           |
|--------------|--------------------|----------|----------|---------|------|-----------|-----------|
| Unigene92406 | Potri.006G254100.1 | 23.1352  | 74.5207  | -1.6876 | Down | 3.95E-78  | 6.31E-77  |
| Unigene42890 | Potri.010G092200.1 | 11.131   | 35.8611  | -1.6878 | Down | 7.86E-110 | 1.89E-108 |
| Unigene42621 | Potri.018G086700.6 | 39.0239  | 125.7377 | -1.688  | Down | 0         | 0         |
| Unigene94129 | Potri.010G211300.1 | 100.1224 | 322.5964 | -1.688  | Down | 0         | 0         |
| Unigene1279  | Potri.006G265300.1 | 6.2936   | 20.2792  | -1.688  | Down | 4.74E-30  | 2.88E-29  |
| Unigene2397  | Potri.003G221500.3 | 4.5579   | 14.6865  | -1.688  | Down | 4.74E-30  | 2.88E-29  |
| Unigene14541 | Potri.019G039700.1 | 20.6378  | 66.4994  | -1.6881 | Down | 1.95E-58  | 2.26E-57  |
| Unigene23659 | Potri.014G078500.1 | 10.2713  | 33.0976  | -1.6881 | Down | 8.34E-88  | 1.52E-86  |
| Unigene13067 | Potri.006G205300.1 | 12.2586  | 39.5079  | -1.6883 | Down | 4.92E-93  | 9.60E-92  |
| Unigene7873  | Potri.014G051500.3 | 11.2666  | 36.3113  | -1.6884 | Down | 6.93E-63  | 8.67E-62  |
| Unigene38621 | Potri.013G074100.3 | 28.2962  | 91.1962  | -1.6884 | Down | 2.70E-93  | 5.27E-92  |
| Unigene86934 | Potri.012G109800.1 | 42.7492  | 137.7778 | -1.6884 | Down | 1.48E-93  | 2.90E-92  |
| Unigene32424 | Potri.009G080800.4 | 19.1919  | 61.8548  | -1.6884 | Down | 8.09E-94  | 1.59E-92  |
| Unigene29625 | Potri.006G111100.2 | 8.9226   | 28.76    | -1.6885 | Down | 1.82E-33  | 1.22E-32  |
| Unigene32047 | Potri.006G037100.1 | 15.0455  | 48.4932  | -1.6885 | Down | 3.99E-95  | 8.00E-94  |
| Unigene44223 | Potri.005G092700.2 | 8.0793   | 26.0406  | -1.6885 | Down | 6.11E-33  | 4.03E-32  |
| Unigene1162  | Potri.018G097700.1 | 13.4944  | 43.4982  | -1.6886 | Down | 8.74E-99  | 1.85E-97  |
| Unigene2600  | Potri.004G161800.2 | 4.2362   | 13.6548  | -1.6886 | Down | 9.97E-34  | 6.69E-33  |
| Unigene21770 | Potri.005G141500.1 | 7.9842   | 25.7406  | -1.6888 | Down | 9.78E-71  | 1.39E-69  |
| Unigene8518  | Potri.002G029300.3 | 13.1765  | 42.4784  | -1.6888 | Down | 1.45E-35  | 1.02E-34  |
| Unigene89063 | Potri.012G144200.2 | 30.0976  | 97.0467  | -1.689  | Down | 1.16E-74  | 1.76E-73  |
| Unigene38285 | Potri.018G114700.1 | 9.6147   | 31.0021  | -1.6891 | Down | 1.88E-38  | 1.42E-37  |
| Unigene14148 | Potri.006G271600.1 | 28.199   | 90.9346  | -1.6892 | Down | 2.70E-116 | 6.98E-115 |
| Unigene45401 | Potri.T120700.1    | 4.651    | 14.9994  | -1.6893 | Down | 2.45E-41  | 1.99E-40  |
| Unigene75419 | Potri.018G013800.1 | 156.7931 | 505.679  | -1.6894 | Down | 2.04E-243 | 1.36E-241 |
| Unigene46232 | Potri.014G178500.2 | 8.1267   | 26.2102  | -1.6894 | Down | 2.19E-42  | 1.82E-41  |
| Unigene19243 | Potri.013G074100.3 | 44.6685  | 144.0787 | -1.6895 | Down | 1.28E-129 | 3.77E-128 |
| Unigene11891 | Potri.001G206600.1 | 18.0482  | 58.2155  | -1.6895 | Down | 9.58E-45  | 8.35E-44  |
| Unigene42436 | Potri.010G234700.1 | 6.8359   | 22.0499  | -1.6896 | Down | 1.61E-88  | 2.95E-87  |
| Unigene22440 | Potri.006G256400.1 | 9.0106   | 29.0665  | -1.6897 | Down | 1.40E-46  | 1.27E-45  |
| Unigene76193 | Potri.014G159000.3 | 30.1712  | 97.3375  | -1.6898 | Down | 3.36E-49  | 3.23E-48  |
| Unigene39404 | Potri.007G019800.1 | 4.1169   | 13.282   | -1.6898 | Down | 1.84E-49  | 1.77E-48  |
| Unigene194   | Potri.018G084900.2 | 9.6537   | 31.1466  | -1.6899 | Down | 1.23E-198 | 6.36E-197 |
| Unigene43441 | Potri.003G193100.2 | 4.308    | 13.9003  | -1.69   | Down | 9.96E-105 | 2.25E-103 |
| Unigene33805 | Potri.002G109000.3 | 10.5698  | 34.1119  | -1.6903 | Down | 1.84E-60  | 2.21E-59  |
| Unigene73355 | Potri.003G123400.1 | 47.199   | 152.361  | -1.6907 | Down | 1.88E-71  | 2.70E-70  |
| Unigene24784 | Potri.016G052800.1 | 28.8884  | 93.262   | -1.6908 | Down | 2.81E-152 | 1.03E-150 |
| Unigene438   | Potri.006G227200.6 | 6.4769   | 20.9116  | -1.6909 | Down | 5.83E-83  | 9.94E-82  |
| Unigene2146  | Potri.006G009200.1 | 23.3887  | 75.512   | -1.6909 | Down | 1.18E-81  | 1.98E-80  |

|               |                     |         |          |         |      |           |           |
|---------------|---------------------|---------|----------|---------|------|-----------|-----------|
| Unigene778    | Potri.013G017100.1  | 8.2716  | 26.7066  | -1.691  | Down | 2.58E-85  | 4.56E-84  |
| Unigene31784  | Potri.015G060800.3  | 5.8322  | 18.8324  | -1.6911 | Down | 3.33E-94  | 6.59E-93  |
| Unigene35042  | Potri.005G116400.2  | 18.3243 | 59.172   | -1.6912 | Down | 2.43E-97  | 5.03E-96  |
| Unigene855    | Potri.001G350000.1  | 6.4634  | 20.8715  | -1.6912 | Down | 1.20E-98  | 2.53E-97  |
| Unigene27652  | Potri.018G142700.10 | 2.1437  | 6.9285   | -1.6924 | Down | 1.13E-06  | 2.57E-06  |
| Unigene5509   | Potri.017G106100.1  | 1.7762  | 5.7407   | -1.6924 | Down | 3.29E-04  | 5.97E-04  |
| Unigene23457  | Potri.017G027200.1  | 2.8189  | 9.1108   | -1.6924 | Down | 2.80E-16  | 1.08E-15  |
| Unigene105140 | Potri.016G003200.1  | 1.0607  | 3.4281   | -1.6924 | Down | 1.74E-04  | 3.25E-04  |
| Unigene16860  | Potri.012G048500.2  | 2.9255  | 9.4553   | -1.6924 | Down | 1.38E-05  | 2.88E-05  |
| Unigene109317 | Potri.011G103600.1  | 2.2659  | 7.3235   | -1.6924 | Down | 9.19E-05  | 1.77E-04  |
| Unigene24978  | Potri.010G121500.2  | 4.0238  | 13.0051  | -1.6924 | Down | 3.95E-18  | 1.64E-17  |
| Unigene117300 | Potri.010G097700.1  | 1.1558  | 3.7355   | -1.6924 | Down | 3.29E-04  | 5.97E-04  |
| Unigene117389 | Potri.009G163300.3  | 1.1429  | 3.6939   | -1.6924 | Down | 3.29E-04  | 5.97E-04  |
| Unigene48674  | Potri.009G153800.1  | 1.1433  | 3.6952   | -1.6924 | Down | 1.38E-05  | 2.88E-05  |
| Unigene55634  | Potri.009G105200.1  | 1.6024  | 5.179    | -1.6924 | Down | 3.93E-06  | 8.62E-06  |
| Unigene46571  | Potri.009G051200.4  | 1.7413  | 5.6279   | -1.6924 | Down | 2.10E-06  | 4.70E-06  |
| Unigene34535  | Potri.009G036800.1  | 0.9337  | 3.0177   | -1.6924 | Down | 1.13E-06  | 2.57E-06  |
| Unigene15865  | Potri.007G075500.3  | 1.2503  | 4.041    | -1.6924 | Down | 1.74E-04  | 3.25E-04  |
| Unigene25281  | Potri.006G114300.1  | 3.7854  | 12.2346  | -1.6924 | Down | 2.66E-12  | 8.58E-12  |
| Unigene37081  | Potri.006G004900.1  | 1.5253  | 4.9298   | -1.6924 | Down | 3.29E-04  | 5.97E-04  |
| Unigene12462  | Potri.005G237100.1  | 1.5994  | 5.1693   | -1.6924 | Down | 7.86E-09  | 2.09E-08  |
| Unigene52097  | Potri.005G018100.1  | 1.1873  | 3.8373   | -1.6924 | Down | 1.74E-04  | 3.25E-04  |
| Unigene6990   | Potri.004G209700.17 | 0.97    | 3.135    | -1.6924 | Down | 3.29E-04  | 5.97E-04  |
| Unigene30812  | Potri.004G122200.1  | 1.5488  | 5.0058   | -1.6924 | Down | 1.74E-04  | 3.25E-04  |
| Unigene10257  | Potri.004G036800.4  | 1.8966  | 6.1299   | -1.6924 | Down | 2.59E-05  | 5.27E-05  |
| Unigene64246  | Potri.003G220800.1  | 2.5302  | 8.1777   | -1.6924 | Down | 1.24E-09  | 3.45E-09  |
| Unigene111116 | Potri.003G052400.1  | 2.769   | 8.9495   | -1.6924 | Down | 7.35E-06  | 1.58E-05  |
| Unigene42296  | Potri.001G255800.1  | 1.6282  | 5.2623   | -1.6924 | Down | 3.29E-04  | 5.97E-04  |
| Unigene98791  | Potri.001G236800.1  | 1.492   | 4.8222   | -1.6924 | Down | 3.29E-04  | 5.97E-04  |
| Unigene40713  | Potri.001G111600.1  | 1.1573  | 3.7404   | -1.6924 | Down | 9.19E-05  | 1.77E-04  |
| Unigene65645  | Potri.001G037500.1  | 1.3233  | 4.2769   | -1.6924 | Down | 1.38E-05  | 2.88E-05  |
| Unigene9976   | Potri.T112100.1     | 1.983   | 6.4093   | -1.6925 | Down | 6.03E-07  | 1.41E-06  |
| Unigene36465  | Potri.019G116700.1  | 35.8244 | 115.7879 | -1.6925 | Down | 9.77E-91  | 1.85E-89  |
| Unigene16467  | Potri.019G043300.7  | 10.4492 | 33.7727  | -1.6925 | Down | 2.38E-22  | 1.14E-21  |
| Unigene80425  | Potri.019G039700.1  | 72.7943 | 235.2779 | -1.6925 | Down | 2.27E-128 | 6.63E-127 |
| Unigene52266  | Potri.019G001800.1  | 4.3121  | 13.9371  | -1.6925 | Down | 4.91E-12  | 1.56E-11  |
| Unigene27029  | Potri.018G150900.2  | 1.7468  | 5.6459   | -1.6925 | Down | 7.35E-06  | 1.58E-05  |
| Unigene97977  | Potri.018G150600.2  | 1.6514  | 5.3376   | -1.6925 | Down | 4.24E-09  | 1.15E-08  |
| Unigene63329  | Potri.018G124400.2  | 1.1814  | 3.8185   | -1.6925 | Down | 4.87E-05  | 9.65E-05  |

|               |                    |         |          |         |      |          |          |
|---------------|--------------------|---------|----------|---------|------|----------|----------|
| Unigene117605 | Potri.018G108200.1 | 1.2032  | 3.8889   | -1.6925 | Down | 1.74E-04 | 3.25E-04 |
| Unigene60670  | Potri.018G084900.2 | 2.3682  | 7.6543   | -1.6925 | Down | 1.38E-05 | 2.88E-05 |
| Unigene52180  | Potri.018G048600.1 | 4.1444  | 13.3951  | -1.6925 | Down | 4.24E-09 | 1.15E-08 |
| Unigene98610  | Potri.017G137700.1 | 2.3485  | 7.5905   | -1.6925 | Down | 7.35E-06 | 1.58E-05 |
| Unigene52609  | Potri.017G058500.1 | 1.3011  | 4.2054   | -1.6925 | Down | 3.93E-06 | 8.62E-06 |
| Unigene48195  | Potri.016G100600.3 | 21.314  | 68.8889  | -1.6925 | Down | 2.21E-38 | 1.66E-37 |
| Unigene3609   | Potri.016G046600.1 | 17.1529 | 55.4399  | -1.6925 | Down | 2.99E-57 | 3.38E-56 |
| Unigene81301  | Potri.016G013300.1 | 2.064   | 6.6711   | -1.6925 | Down | 4.87E-05 | 9.65E-05 |
| Unigene56719  | Potri.015G120400.4 | 5.7271  | 18.5105  | -1.6925 | Down | 9.07E-12 | 2.84E-11 |
| Unigene54216  | Potri.015G110500.1 | 8.3168  | 26.8806  | -1.6925 | Down | 2.77E-36 | 1.99E-35 |
| Unigene93956  | Potri.015G083300.1 | 5.29    | 17.0976  | -1.6925 | Down | 2.37E-27 | 1.33E-26 |
| Unigene62005  | Potri.015G010400.2 | 5.6046  | 18.1146  | -1.6925 | Down | 1.86E-24 | 9.56E-24 |
| Unigene118755 | Potri.014G153500.1 | 1.5445  | 4.992    | -1.6925 | Down | 1.13E-06 | 2.57E-06 |
| Unigene47998  | Potri.014G145100.1 | 1.3011  | 4.2054   | -1.6925 | Down | 1.74E-04 | 3.25E-04 |
| Unigene2666   | Potri.014G136000.2 | 1.9605  | 6.3365   | -1.6925 | Down | 9.07E-12 | 2.84E-11 |
| Unigene54332  | Potri.014G128300.1 | 6.1737  | 19.954   | -1.6925 | Down | 3.69E-14 | 1.30E-13 |
| Unigene29067  | Potri.014G103300.1 | 4.6754  | 15.1114  | -1.6925 | Down | 3.01E-25 | 1.59E-24 |
| Unigene9000   | Potri.014G091500.2 | 1.3287  | 4.2946   | -1.6925 | Down | 4.87E-05 | 9.65E-05 |
| Unigene3555   | Potri.013G150200.1 | 11.868  | 38.3586  | -1.6925 | Down | 5.61E-20 | 2.49E-19 |
| Unigene48914  | Potri.013G132500.4 | 2.0281  | 6.555    | -1.6925 | Down | 1.74E-07 | 4.23E-07 |
| Unigene86280  | Potri.013G120700.2 | 40.1592 | 129.7982 | -1.6925 | Down | 2.72E-86 | 4.87E-85 |
| Unigene45134  | Potri.013G039600.6 | 2.6407  | 8.5349   | -1.6925 | Down | 6.68E-10 | 1.90E-09 |
| Unigene13367  | Potri.013G034600.1 | 1.9594  | 6.3329   | -1.6925 | Down | 5.15E-16 | 1.96E-15 |
| Unigene118629 | Potri.012G118200.1 | 1.9293  | 6.2356   | -1.6925 | Down | 9.35E-08 | 2.32E-07 |
| Unigene49367  | Potri.012G084400.1 | 1.843   | 5.9569   | -1.6925 | Down | 6.03E-07 | 1.41E-06 |
| Unigene38873  | Potri.012G068100.4 | 2.8523  | 9.219    | -1.6925 | Down | 2.71E-08 | 6.97E-08 |
| Unigene33932  | Potri.011G147500.2 | 5.8522  | 18.9148  | -1.6925 | Down | 1.64E-25 | 8.73E-25 |
| Unigene45277  | Potri.011G127600.1 | 5.6226  | 18.1729  | -1.6925 | Down | 6.59E-39 | 5.03E-38 |
| Unigene18631  | Potri.011G092700.3 | 4.3307  | 13.9971  | -1.6925 | Down | 4.89E-26 | 2.64E-25 |
| Unigene38091  | Potri.011G081000.1 | 4.6163  | 14.9202  | -1.6925 | Down | 5.03E-08 | 1.27E-07 |
| Unigene99711  | Potri.011G037100.1 | 4.0002  | 12.9292  | -1.6925 | Down | 4.94E-21 | 2.27E-20 |
| Unigene30049  | Potri.010G250600.1 | 1.8941  | 6.122    | -1.6925 | Down | 9.19E-05 | 1.77E-04 |
| Unigene118465 | Potri.010G238000.1 | 1.3441  | 4.3443   | -1.6925 | Down | 1.38E-05 | 2.88E-05 |
| Unigene49357  | Potri.010G166600.1 | 1.6108  | 5.2062   | -1.6925 | Down | 6.68E-10 | 1.90E-09 |
| Unigene13957  | Potri.010G087800.1 | 13.9477 | 45.0803  | -1.6925 | Down | 2.77E-36 | 1.99E-35 |
| Unigene23433  | Potri.010G014000.1 | 5.9539  | 19.2436  | -1.6925 | Down | 2.10E-28 | 1.22E-27 |
| Unigene36864  | Potri.009G131200.1 | 8.5549  | 27.6504  | -1.6925 | Down | 1.09E-14 | 3.91E-14 |
| Unigene8067   | Potri.009G075700.1 | 20.3327 | 65.7172  | -1.6925 | Down | 3.13E-79 | 5.09E-78 |
| Unigene22567  | Potri.009G050600.2 | 2.1529  | 6.9585   | -1.6925 | Down | 1.29E-22 | 6.27E-22 |

|               |                    |         |         |         |      |          |          |
|---------------|--------------------|---------|---------|---------|------|----------|----------|
| Unigene33897  | Potri.009G037000.1 | 13.1816 | 42.6041 | -1.6925 | Down | 2.15E-49 | 2.08E-48 |
| Unigene96791  | Potri.008G151500.1 | 3.784   | 12.2303 | -1.6925 | Down | 2.00E-14 | 7.12E-14 |
| Unigene26007  | Potri.008G140700.1 | 7.9657  | 25.7458 | -1.6925 | Down | 3.95E-18 | 1.64E-17 |
| Unigene65111  | Potri.008G124700.1 | 8.9309  | 28.8654 | -1.6925 | Down | 1.89E-19 | 8.24E-19 |
| Unigene96328  | Potri.008G094400.1 | 0.9446  | 3.0531  | -1.6925 | Down | 3.09E-11 | 9.44E-11 |
| Unigene45265  | Potri.008G083800.2 | 2.2286  | 7.203   | -1.6925 | Down | 2.10E-06 | 4.70E-06 |
| Unigene5338   | Potri.008G066400.3 | 1.4164  | 4.5781  | -1.6925 | Down | 1.74E-04 | 3.25E-04 |
| Unigene26984  | Potri.008G025700.1 | 1.8821  | 6.0831  | -1.6925 | Down | 3.29E-04 | 5.97E-04 |
| Unigene41582  | Potri.007G124400.1 | 2.5405  | 8.2112  | -1.6925 | Down | 3.24E-07 | 7.72E-07 |
| Unigene28291  | Potri.007G068900.1 | 1.181   | 3.8171  | -1.6925 | Down | 1.74E-04 | 3.25E-04 |
| Unigene53576  | Potri.007G032700.1 | 7.563   | 24.4445 | -1.6925 | Down | 4.25E-13 | 1.42E-12 |
| Unigene31259  | Potri.007G011200.5 | 1.5121  | 4.8874  | -1.6925 | Down | 1.74E-04 | 3.25E-04 |
| Unigene4272   | Potri.007G005500.1 | 2.6345  | 8.5151  | -1.6925 | Down | 2.10E-06 | 4.71E-06 |
| Unigene99151  | Potri.006G219800.2 | 1.7239  | 5.5719  | -1.6925 | Down | 3.29E-04 | 5.97E-04 |
| Unigene32034  | Potri.006G182000.3 | 6.2472  | 20.1916 | -1.6925 | Down | 3.72E-55 | 4.03E-54 |
| Unigene61062  | Potri.006G148100.1 | 1.935   | 6.2542  | -1.6925 | Down | 4.24E-09 | 1.15E-08 |
| Unigene8537   | Potri.006G118400.1 | 18.1013 | 58.5049 | -1.6925 | Down | 2.77E-36 | 1.99E-35 |
| Unigene114405 | Potri.006G068200.4 | 2.4959  | 8.0669  | -1.6925 | Down | 3.93E-06 | 8.62E-06 |
| Unigene4227   | Potri.006G062800.1 | 18.2768 | 59.0723 | -1.6925 | Down | 2.37E-27 | 1.33E-26 |
| Unigene105705 | Potri.006G060900.1 | 1.5872  | 5.13    | -1.6925 | Down | 3.24E-07 | 7.73E-07 |
| Unigene17744  | Potri.006G051200.2 | 3.2462  | 10.492  | -1.6925 | Down | 5.91E-15 | 2.15E-14 |
| Unigene38587  | Potri.006G051000.1 | 2.841   | 9.1824  | -1.6925 | Down | 1.24E-09 | 3.45E-09 |
| Unigene84018  | Potri.006G048400.5 | 11.122  | 35.9475 | -1.6925 | Down | 3.85E-23 | 1.90E-22 |
| Unigene50402  | Potri.006G003800.3 | 4.3882  | 14.183  | -1.6925 | Down | 3.21E-15 | 1.18E-14 |
| Unigene30345  | Potri.005G226500.1 | 1.6359  | 5.2875  | -1.6925 | Down | 2.59E-05 | 5.27E-05 |
| Unigene25688  | Potri.005G215200.1 | 3.1383  | 10.1433 | -1.6925 | Down | 1.33E-17 | 5.43E-17 |
| Unigene24981  | Potri.005G215100.1 | 6.9523  | 22.4704 | -1.6925 | Down | 3.95E-18 | 1.64E-17 |
| Unigene13355  | Potri.005G187300.2 | 2.3312  | 7.5347  | -1.6925 | Down | 1.06E-10 | 3.14E-10 |
| Unigene34458  | Potri.005G144700.1 | 7.6055  | 24.5816 | -1.6925 | Down | 1.83E-56 | 2.03E-55 |
| Unigene40685  | Potri.005G128200.1 | 1.3688  | 4.4241  | -1.6925 | Down | 1.74E-04 | 3.25E-04 |
| Unigene50746  | Potri.005G111700.1 | 2.7376  | 8.8481  | -1.6925 | Down | 6.68E-10 | 1.90E-09 |
| Unigene49468  | Potri.005G098800.1 | 1.2032  | 3.8889  | -1.6925 | Down | 9.19E-05 | 1.77E-04 |
| Unigene20265  | Potri.005G092000.1 | 2.1352  | 6.9012  | -1.6925 | Down | 6.68E-10 | 1.90E-09 |
| Unigene10280  | Potri.005G075900.1 | 6.7919  | 21.9519 | -1.6925 | Down | 1.33E-17 | 5.43E-17 |
| Unigene52375  | Potri.005G010200.1 | 6.7086  | 21.6827 | -1.6925 | Down | 1.09E-14 | 3.91E-14 |
| Unigene19948  | Potri.004G117000.5 | 2.3312  | 7.5347  | -1.6925 | Down | 4.87E-05 | 9.65E-05 |
| Unigene6199   | Potri.004G103700.3 | 1.6717  | 5.4031  | -1.6925 | Down | 1.38E-05 | 2.88E-05 |
| Unigene117769 | Potri.004G099300.3 | 1.4646  | 4.7339  | -1.6925 | Down | 2.59E-05 | 5.27E-05 |
| Unigene38872  | Potri.004G077800.1 | 1.9345  | 6.2525  | -1.6925 | Down | 6.68E-10 | 1.90E-09 |

|               |                    |         |          |         |      |           |           |
|---------------|--------------------|---------|----------|---------|------|-----------|-----------|
| Unigene44992  | Potri.004G059200.2 | 2.442   | 7.8928   | -1.6925 | Down | 7.26E-18  | 2.98E-17  |
| Unigene94760  | Potri.004G039500.1 | 4.4898  | 14.5113  | -1.6925 | Down | 2.71E-08  | 6.97E-08  |
| Unigene95248  | Potri.003G137900.2 | 1.6387  | 5.2964   | -1.6925 | Down | 6.03E-07  | 1.41E-06  |
| Unigene12598  | Potri.003G137200.1 | 5.1848  | 16.7577  | -1.6925 | Down | 3.47E-19  | 1.50E-18  |
| Unigene113855 | Potri.003G117400.1 | 4.5731  | 14.7808  | -1.6925 | Down | 6.68E-10  | 1.90E-09  |
| Unigene99189  | Potri.003G086200.1 | 1.3025  | 4.2099   | -1.6925 | Down | 3.24E-07  | 7.72E-07  |
| Unigene107820 | Potri.003G043300.3 | 12.8619 | 41.5709  | -1.6925 | Down | 5.61E-20  | 2.49E-19  |
| Unigene6615   | Potri.003G034900.3 | 4.838   | 15.6369  | -1.6925 | Down | 7.26E-18  | 2.98E-17  |
| Unigene4688   | Potri.003G009900.1 | 7.2276  | 23.3603  | -1.6925 | Down | 2.80E-16  | 1.08E-15  |
| Unigene30604  | Potri.002G152100.1 | 7.4599  | 24.1111  | -1.6925 | Down | 2.00E-14  | 7.12E-14  |
| Unigene42342  | Potri.002G149400.1 | 1.4075  | 4.5493   | -1.6925 | Down | 3.24E-07  | 7.72E-07  |
| Unigene49281  | Potri.002G124600.1 | 12.9556 | 41.8737  | -1.6925 | Down | 3.49E-34  | 2.37E-33  |
| Unigene2598   | Potri.002G109000.3 | 2.3425  | 7.5711   | -1.6925 | Down | 2.71E-08  | 6.97E-08  |
| Unigene14992  | Potri.002G076000.1 | 4.1444  | 13.3951  | -1.6925 | Down | 1.74E-07  | 4.23E-07  |
| Unigene4851   | Potri.002G046800.3 | 5.8727  | 18.9811  | -1.6925 | Down | 3.09E-11  | 9.44E-11  |
| Unigene8128   | Potri.002G004600.1 | 4.9206  | 15.9039  | -1.6925 | Down | 7.06E-23  | 3.45E-22  |
| Unigene41040  | Potri.001G455800.2 | 11.8368 | 38.2575  | -1.6925 | Down | 3.40E-24  | 1.74E-23  |
| Unigene53597  | Potri.001G448900.1 | 6.751   | 21.82    | -1.6925 | Down | 4.91E-12  | 1.56E-11  |
| Unigene1771   | Potri.001G414800.1 | 10.0392 | 32.4477  | -1.6925 | Down | 9.28E-36  | 6.57E-35  |
| Unigene23495  | Potri.001G323100.3 | 10.3861 | 33.5688  | -1.6925 | Down | 8.06E-32  | 5.15E-31  |
| Unigene119399 | Potri.001G306500.3 | 1.1609  | 3.7521   | -1.6925 | Down | 1.74E-07  | 4.23E-07  |
| Unigene118515 | Potri.001G289300.1 | 1.0775  | 3.4827   | -1.6925 | Down | 9.19E-05  | 1.77E-04  |
| Unigene31763  | Potri.001G261600.1 | 1.4801  | 4.784    | -1.6925 | Down | 1.13E-06  | 2.57E-06  |
| Unigene36731  | Potri.001G255800.1 | 14.7912 | 47.8065  | -1.6925 | Down | 8.97E-26  | 4.80E-25  |
| Unigene109724 | Potri.001G253100.2 | 4.9847  | 16.1111  | -1.6925 | Down | 4.24E-09  | 1.15E-08  |
| Unigene12853  | Potri.001G244600.2 | 8.7764  | 28.366   | -1.6925 | Down | 1.01E-24  | 5.25E-24  |
| Unigene42694  | Potri.001G170700.2 | 7.9093  | 25.5636  | -1.6925 | Down | 7.35E-71  | 1.05E-69  |
| Unigene42214  | Potri.001G124300.1 | 1.6493  | 5.3307   | -1.6925 | Down | 9.19E-05  | 1.77E-04  |
| Unigene53479  | Potri.001G123400.5 | 3.755   | 12.1365  | -1.6925 | Down | 2.29E-09  | 6.30E-09  |
| Unigene107502 | Potri.001G118100.3 | 2.4124  | 7.7971   | -1.6925 | Down | 9.19E-05  | 1.77E-04  |
| Unigene5986   | Potri.001G102200.4 | 3.0597  | 9.8893   | -1.6925 | Down | 6.03E-07  | 1.41E-06  |
| Unigene7533   | Potri.001G068900.1 | 1.9421  | 6.277    | -1.6925 | Down | 1.95E-10  | 5.71E-10  |
| Unigene38850  | Potri.001G054900.1 | 2.3522  | 7.6026   | -1.6925 | Down | 7.86E-09  | 2.09E-08  |
| Unigene32972  | Potri.001G031700.3 | 1.457   | 4.7092   | -1.6925 | Down | 1.13E-06  | 2.57E-06  |
| Unigene111568 | Potri.001G024600.3 | 1.9128  | 6.1823   | -1.6925 | Down | 1.74E-04  | 3.25E-04  |
| Unigene10640  | Potri.001G012200.3 | 5.8669  | 18.9624  | -1.6925 | Down | 8.44E-81  | 1.40E-79  |
| Unigene32470  | Potri.001G011900.1 | 13.3553 | 43.1657  | -1.6925 | Down | 8.74E-185 | 4.13E-183 |
| Unigene77284  | Potri.010G171600.2 | 85.9511 | 277.9768 | -1.6934 | Down | 1.40E-140 | 4.61E-139 |
| Unigene21805  | Potri.005G084800.1 | 17.6748 | 57.1712  | -1.6936 | Down | 2.08E-113 | 5.21E-112 |



|              |                    |         |          |         |      |           |           |
|--------------|--------------------|---------|----------|---------|------|-----------|-----------|
| Unigene1210  | Potri.T169700.1    | 27.3612 | 88.533   | -1.6941 | Down | 1.72E-235 | 1.09E-233 |
| Unigene73832 | Potri.018G070000.5 | 51.8341 | 167.7214 | -1.6941 | Down | 2.01E-79  | 3.27E-78  |
| Unigene21418 | Potri.018G021100.2 | 22.4429 | 72.635   | -1.6944 | Down | 3.75E-132 | 1.14E-130 |
| Unigene26932 | Potri.003G004700.1 | 30.6572 | 99.2244  | -1.6945 | Down | 8.98E-65  | 1.16E-63  |
| Unigene47398 | Potri.001G275500.1 | 7.1438  | 23.122   | -1.6945 | Down | 1.83E-63  | 2.31E-62  |
| Unigene76251 | Potri.002G124200.1 | 36.8022 | 119.1268 | -1.6946 | Down | 4.62E-60  | 5.50E-59  |
| Unigene19653 | Potri.001G455800.2 | 9.6229  | 31.1481  | -1.6946 | Down | 4.14E-61  | 5.02E-60  |
| Unigene11521 | Potri.001G212600.3 | 6.5976  | 21.3552  | -1.6946 | Down | 1.93E-121 | 5.29E-120 |
| Unigene53871 | Potri.017G059400.2 | 21.8264 | 70.6553  | -1.6947 | Down | 1.05E-57  | 1.20E-56  |
| Unigene43395 | Potri.001G027400.1 | 7.8525  | 25.4186  | -1.6947 | Down | 1.54E-59  | 1.82E-58  |
| Unigene3283  | Potri.006G129000.3 | 10.1277 | 32.7869  | -1.6948 | Down | 1.30E-55  | 1.43E-54  |
| Unigene27567 | Potri.008G133600.1 | 14.5054 | 46.9625  | -1.6949 | Down | 2.97E-53  | 3.10E-52  |
| Unigene46474 | Potri.006G050700.1 | 19.4468 | 62.9683  | -1.6951 | Down | 7.55E-50  | 7.34E-49  |
| Unigene28680 | Potri.015G070100.2 | 9.3118  | 30.153   | -1.6952 | Down | 1.54E-48  | 1.46E-47  |
| Unigene22368 | Potri.005G059000.3 | 4.0669  | 13.1697  | -1.6952 | Down | 9.42E-48  | 8.79E-47  |
| Unigene10246 | Potri.001G137200.2 | 83.6889 | 270.9969 | -1.6952 | Down | 5.18E-282 | 4.19E-280 |
| Unigene1063  | Potri.018G037900.1 | 5.3466  | 17.3147  | -1.6953 | Down | 3.52E-46  | 3.17E-45  |
| Unigene33800 | Potri.006G212400.4 | 17.1663 | 55.5971  | -1.6954 | Down | 2.40E-44  | 2.08E-43  |
| Unigene18567 | Potri.001G306500.1 | 13.5402 | 43.8551  | -1.6955 | Down | 1.47E-43  | 1.25E-42  |
| Unigene10639 | Potri.004G105300.1 | 11.454  | 37.1002  | -1.6956 | Down | 1.50E-204 | 8.02E-203 |
| Unigene89109 | Potri.010G131000.1 | 16.0774 | 52.0791  | -1.6957 | Down | 3.37E-41  | 2.72E-40  |
| Unigene92393 | Potri.009G010600.1 | 11.5132 | 37.2966  | -1.6958 | Down | 3.77E-40  | 2.97E-39  |
| Unigene39124 | Potri.012G091800.1 | 15.3586 | 49.7587  | -1.6959 | Down | 1.41E-38  | 1.07E-37  |
| Unigene26909 | Potri.004G196800.3 | 17.508  | 56.724   | -1.6959 | Down | 4.73E-38  | 3.54E-37  |
| Unigene225   | Potri.003G161400.1 | 3.3019  | 10.6985  | -1.696  | Down | 2.90E-37  | 2.13E-36  |
| Unigene24525 | Potri.004G219100.3 | 5.055   | 16.3794  | -1.6961 | Down | 1.77E-36  | 1.28E-35  |
| Unigene25179 | Potri.001G135900.1 | 15.2382 | 49.3739  | -1.6961 | Down | 5.30E-37  | 3.87E-36  |
| Unigene29213 | Potri.002G163000.1 | 10.2756 | 33.2988  | -1.6962 | Down | 3.64E-35  | 2.53E-34  |
| Unigene29533 | Potri.016G034100.1 | 8.9861  | 29.1208  | -1.6963 | Down | 6.67E-35  | 4.60E-34  |
| Unigene25565 | Potri.015G055200.1 | 13.8064 | 44.7435  | -1.6963 | Down | 2.23E-34  | 1.52E-33  |
| Unigene37958 | Potri.011G087200.8 | 25.6563 | 83.1456  | -1.6963 | Down | 2.54E-67  | 3.42E-66  |
| Unigene75583 | Potri.005G155600.1 | 19.578  | 63.4599  | -1.6966 | Down | 2.82E-32  | 1.82E-31  |
| Unigene80    | Potri.004G199200.2 | 9.3502  | 30.3079  | -1.6966 | Down | 2.15E-123 | 5.99E-122 |
| Unigene4933  | Potri.018G067200.2 | 13.1645 | 42.6735  | -1.6967 | Down | 9.44E-32  | 6.02E-31  |
| Unigene2729  | Potri.006G047100.4 | 3.753   | 12.1655  | -1.6967 | Down | 9.44E-32  | 6.02E-31  |
| Unigene18391 | Potri.001G027700.2 | 3.8562  | 12.5004  | -1.6967 | Down | 1.73E-31  | 1.09E-30  |
| Unigene53589 | Potri.008G159700.2 | 18.7349 | 60.7365  | -1.6968 | Down | 1.06E-30  | 6.58E-30  |
| Unigene2277  | Potri.007G064300.1 | 11.3913 | 36.93    | -1.6969 | Down | 3.53E-88  | 6.46E-87  |
| Unigene28066 | Potri.012G077700.4 | 12.0541 | 39.0826  | -1.697  | Down | 1.19E-29  | 7.18E-29  |

|               |                    |         |          |         |      |           |           |
|---------------|--------------------|---------|----------|---------|------|-----------|-----------|
| Unigene26501  | Potri.008G084200.1 | 14.892  | 48.2822  | -1.697  | Down | 6.52E-30  | 3.95E-29  |
| Unigene84876  | Potri.005G206000.1 | 13.5755 | 44.0191  | -1.6971 | Down | 7.34E-29  | 4.31E-28  |
| Unigene33467  | Potri.013G154600.1 | 15.1174 | 49.0206  | -1.6972 | Down | 2.00E-82  | 3.38E-81  |
| Unigene11526  | Potri.005G198400.1 | 11.3472 | 36.7961  | -1.6972 | Down | 5.10E-55  | 5.51E-54  |
| Unigene90458  | Potri.002G057400.4 | 65.3473 | 211.9429 | -1.6975 | Down | 1.46E-178 | 6.57E-177 |
| Unigene30806  | Potri.005G120600.1 | 10.1133 | 32.8042  | -1.6976 | Down | 3.13E-26  | 1.70E-25  |
| Unigene15859  | Potri.004G062300.1 | 7.0975  | 23.0211  | -1.6976 | Down | 1.71E-26  | 9.35E-26  |
| Unigene15127  | Potri.001G241700.1 | 18.8264 | 61.0663  | -1.6976 | Down | 3.90E-100 | 8.36E-99  |
| Unigene83706  | Potri.016G029200.2 | 25.3692 | 82.291   | -1.6977 | Down | 1.45E-50  | 1.43E-49  |
| Unigene30549  | Potri.010G019800.3 | 11.0695 | 35.9074  | -1.6977 | Down | 5.74E-26  | 3.09E-25  |
| Unigene36867  | Potri.002G047100.3 | 66.0287 | 214.191  | -1.6977 | Down | 5.51E-146 | 1.90E-144 |
| Unigene47537  | Potri.017G122600.1 | 10.3931 | 33.7158  | -1.6978 | Down | 1.93E-25  | 1.02E-24  |
| Unigene39594  | Potri.007G058700.1 | 4.8163  | 15.6244  | -1.6978 | Down | 1.93E-25  | 1.02E-24  |
| Unigene80329  | Potri.004G223800.1 | 13.5909 | 44.0898  | -1.6978 | Down | 1.93E-25  | 1.02E-24  |
| Unigene44998  | Potri.002G077000.1 | 7.4161  | 24.0581  | -1.6978 | Down | 2.85E-73  | 4.22E-72  |
| Unigene25356  | Potri.010G157600.3 | 10.2813 | 33.3589  | -1.698  | Down | 2.18E-24  | 1.12E-23  |
| Unigene40424  | Potri.012G000900.1 | 10.8005 | 35.0437  | -1.6981 | Down | 2.18E-24  | 1.12E-23  |
| Unigene3164   | Potri.008G174500.3 | 5.2846  | 17.1466  | -1.6981 | Down | 3.68E-47  | 3.40E-46  |
| Unigene117165 | Potri.010G084100.2 | 9.0033  | 29.2151  | -1.6982 | Down | 7.32E-24  | 3.70E-23  |
| Unigene43831  | Potri.006G003400.3 | 21.6509 | 70.2548  | -1.6982 | Down | 5.15E-135 | 1.61E-133 |
| Unigene25919  | Potri.015G112900.2 | 76.4641 | 248.1436 | -1.6983 | Down | 5.34E-110 | 1.29E-108 |
| Unigene7558   | Potri.005G012400.1 | 3.1532  | 10.2327  | -1.6983 | Down | 2.46E-23  | 1.22E-22  |
| Unigene20071  | Potri.002G044300.1 | 12.2834 | 39.8624  | -1.6983 | Down | 2.46E-23  | 1.22E-22  |
| Unigene25193  | Potri.005G161800.2 | 12.4332 | 40.3506  | -1.6984 | Down | 4.51E-23  | 2.22E-22  |
| Unigene90863  | Potri.002G229200.2 | 30.347  | 98.4892  | -1.6984 | Down | 4.59E-87  | 8.28E-86  |
| Unigene23774  | Potri.013G130800.1 | 46.692  | 151.5681 | -1.6987 | Down | 3.59E-184 | 1.69E-182 |
| Unigene13603  | Potri.001G392600.2 | 6.6329  | 21.5311  | -1.6987 | Down | 1.93E-42  | 1.60E-41  |
| Unigene20600  | Potri.001G323400.3 | 13.9648 | 45.3297  | -1.6987 | Down | 1.05E-42  | 8.79E-42  |
| Unigene44686  | Potri.001G211200.1 | 4.8028  | 15.5902  | -1.6987 | Down | 5.11E-22  | 2.43E-21  |
| Unigene33798  | Potri.005G197000.3 | 5.2496  | 17.0415  | -1.6988 | Down | 9.38E-22  | 4.42E-21  |
| Unigene40118  | Potri.001G118000.2 | 8.2646  | 26.8292  | -1.6988 | Down | 6.44E-42  | 5.28E-41  |
| Unigene112145 | Potri.005G138200.1 | 11.6561 | 37.8411  | -1.6989 | Down | 1.72E-21  | 8.04E-21  |
| Unigene84077  | Potri.003G174600.3 | 40.2835 | 130.7846 | -1.6989 | Down | 2.89E-80  | 4.76E-79  |
| Unigene24108  | Potri.005G083700.1 | 6.3396  | 20.5838  | -1.699  | Down | 2.41E-40  | 1.91E-39  |
| Unigene73604  | Potri.014G086000.1 | 38.1793 | 123.9676 | -1.6991 | Down | 3.86E-59  | 4.52E-58  |
| Unigene3232   | Potri.002G103100.2 | 4.4574  | 14.4733  | -1.6991 | Down | 8.07E-40  | 6.30E-39  |
| Unigene39856  | Potri.010G048700.1 | 3.9884  | 12.9513  | -1.6992 | Down | 1.95E-20  | 8.82E-20  |
| Unigene45074  | Potri.005G226100.1 | 33.1609 | 107.6807 | -1.6992 | Down | 4.08E-171 | 1.74E-169 |
| Unigene35511  | Potri.002G099000.1 | 10.1594 | 32.9925  | -1.6993 | Down | 3.58E-20  | 1.60E-19  |

|              |                    |         |         |         |      |           |           |
|--------------|--------------------|---------|---------|---------|------|-----------|-----------|
| Unigene19042 | Potri.007G100600.1 | 5.4876  | 17.822  | -1.6994 | Down | 6.58E-20  | 2.92E-19  |
| Unigene26800 | Potri.015G112700.1 | 9.6808  | 31.4426 | -1.6995 | Down | 1.21E-19  | 5.31E-19  |
| Unigene22343 | Potri.002G170600.2 | 2.5666  | 8.3358  | -1.6995 | Down | 5.54E-38  | 4.14E-37  |
| Unigene2504  | Potri.007G101500.2 | 6.8656  | 22.3006 | -1.6996 | Down | 2.22E-19  | 9.65E-19  |
| Unigene41244 | Potri.014G128800.1 | 28.5147 | 92.6277 | -1.6997 | Down | 3.64E-54  | 3.87E-53  |
| Unigene27078 | Potri.009G112100.1 | 9.4706  | 30.7668 | -1.6998 | Down | 7.48E-19  | 3.19E-18  |
| Unigene32163 | Potri.014G042300.1 | 4.6084  | 14.9725 | -1.7    | Down | 1.27E-35  | 8.97E-35  |
| Unigene9423  | Potri.015G106400.1 | 8.8842  | 28.8665 | -1.7001 | Down | 4.27E-35  | 2.96E-34  |
| Unigene2447  | Potri.014G145300.4 | 18.7568 | 60.9468 | -1.7001 | Down | 1.06E-117 | 2.78E-116 |
| Unigene5637  | Potri.010G154000.1 | 10.4905 | 34.0857 | -1.7001 | Down | 2.52E-18  | 1.06E-17  |
| Unigene21851 | Potri.003G197600.3 | 4.3882  | 14.2593 | -1.7002 | Down | 1.43E-34  | 9.78E-34  |
| Unigene44297 | Potri.013G149900.1 | 3.0954  | 10.0602 | -1.7005 | Down | 1.57E-17  | 6.35E-17  |
| Unigene19480 | Potri.017G099400.1 | 26.4764 | 86.0561 | -1.7006 | Down | 3.38E-80  | 5.57E-79  |
| Unigene10867 | Potri.012G131300.2 | 2.214   | 7.1961  | -1.7006 | Down | 5.38E-33  | 3.55E-32  |
| Unigene33295 | Potri.011G002600.1 | 3.0822  | 10.0182 | -1.7006 | Down | 2.88E-17  | 1.15E-16  |
| Unigene33164 | Potri.010G129700.2 | 2.2207  | 7.2179  | -1.7006 | Down | 2.88E-17  | 1.15E-16  |
| Unigene53875 | Potri.008G214100.1 | 11.4768 | 37.3072 | -1.7007 | Down | 1.80E-32  | 1.17E-31  |
| Unigene10445 | Potri.004G149200.1 | 8.6535  | 28.1296 | -1.7007 | Down | 5.29E-17  | 2.10E-16  |
| Unigene45264 | Potri.007G050200.2 | 2.6792  | 8.7097  | -1.7008 | Down | 3.30E-32  | 2.13E-31  |
| Unigene22205 | Potri.009G163500.1 | 11.9472 | 38.8444 | -1.701  | Down | 7.52E-91  | 1.43E-89  |
| Unigene15561 | Potri.006G226900.1 | 2.3709  | 7.7086  | -1.701  | Down | 1.79E-16  | 6.95E-16  |
| Unigene1673  | Potri.003G203800.1 | 3.7167  | 12.0842 | -1.701  | Down | 1.79E-16  | 6.95E-16  |
| Unigene54334 | Potri.003G163200.1 | 5.615   | 18.2562 | -1.701  | Down | 1.79E-16  | 6.95E-16  |
| Unigene11871 | Potri.002G036600.1 | 9.8682  | 32.0849 | -1.701  | Down | 2.64E-46  | 2.38E-45  |
| Unigene48719 | Potri.001G024100.1 | 9.2424  | 30.05   | -1.701  | Down | 1.79E-16  | 6.95E-16  |
| Unigene7487  | Potri.016G112800.2 | 14.0315 | 45.623  | -1.7011 | Down | 1.73E-75  | 2.65E-74  |
| Unigene27973 | Potri.011G110700.2 | 21.2592 | 69.1252 | -1.7011 | Down | 3.15E-75  | 4.82E-74  |
| Unigene534   | Potri.014G082900.1 | 8.3056  | 27.0071 | -1.7012 | Down | 4.05E-60  | 4.83E-59  |
| Unigene28924 | Potri.004G099500.2 | 9.44    | 30.697  | -1.7012 | Down | 2.95E-45  | 2.60E-44  |
| Unigene54458 | Potri.002G184200.2 | 7.0497  | 22.9235 | -1.7012 | Down | 3.29E-16  | 1.26E-15  |
| Unigene10806 | Potri.019G053000.4 | 4.8457  | 15.7583 | -1.7013 | Down | 9.85E-45  | 8.59E-44  |
| Unigene39800 | Potri.005G075800.1 | 7.9662  | 25.9078 | -1.7014 | Down | 4.17E-30  | 2.54E-29  |
| Unigene48388 | Potri.011G123500.1 | 21.0651 | 68.5111 | -1.7015 | Down | 2.38E-72  | 3.47E-71  |
| Unigene43861 | Potri.005G165000.1 | 11.5203 | 37.4687 | -1.7015 | Down | 4.34E-72  | 6.31E-71  |
| Unigene23262 | Potri.014G195000.2 | 3.9132  | 12.728  | -1.7016 | Down | 1.10E-43  | 9.39E-43  |
| Unigene31973 | Potri.002G081200.3 | 12.1862 | 39.639  | -1.7017 | Down | 1.62E-167 | 6.72E-166 |
| Unigene26287 | Potri.018G115500.1 | 4.7215  | 15.3619 | -1.702  | Down | 6.94E-15  | 2.52E-14  |
| Unigene24550 | Potri.008G144200.1 | 13.6991 | 44.569  | -1.702  | Down | 1.57E-28  | 9.16E-28  |
| Unigene42151 | Potri.018G029200.1 | 4.96    | 16.1382 | -1.7021 | Down | 6.94E-15  | 2.52E-14  |

|               |                    |         |          |         |      |           |           |
|---------------|--------------------|---------|----------|---------|------|-----------|-----------|
| Unigene12232  | Potri.006G160400.1 | 7.6976  | 25.0462  | -1.7021 | Down | 2.52E-41  | 2.04E-40  |
| Unigene8469   | Potri.013G128700.1 | 27.1878 | 88.4668  | -1.7022 | Down | 3.87E-185 | 1.84E-183 |
| Unigene3296   | Potri.012G144400.2 | 8.1188  | 26.4183  | -1.7022 | Down | 2.14E-93  | 4.18E-92  |
| Unigene70475  | Potri.008G085700.1 | 18.2768 | 59.4741  | -1.7022 | Down | 9.68E-28  | 5.50E-27  |
| Unigene28931  | Potri.019G075900.1 | 7.7808  | 25.321   | -1.7023 | Down | 2.60E-53  | 2.72E-52  |
| Unigene42634  | Potri.012G049200.1 | 6.0307  | 19.6253  | -1.7023 | Down | 2.41E-79  | 3.92E-78  |
| Unigene109711 | Potri.011G149300.1 | 8.2506  | 26.8519  | -1.7025 | Down | 2.35E-14  | 8.32E-14  |
| Unigene12988  | Potri.006G228600.1 | 8.1074  | 26.3858  | -1.7025 | Down | 2.68E-78  | 4.28E-77  |
| Unigene27753  | Potri.005G206400.1 | 2.4032  | 7.8213   | -1.7025 | Down | 2.35E-14  | 8.32E-14  |
| Unigene43984  | Potri.003G087800.3 | 37.5356 | 122.1664 | -1.7025 | Down | 1.79E-128 | 5.23E-127 |
| Unigene18401  | Potri.010G061600.2 | 7.8858  | 25.6669  | -1.7026 | Down | 9.21E-65  | 1.19E-63  |
| Unigene59686  | Potri.005G130800.1 | 7.4599  | 24.2821  | -1.7027 | Down | 4.33E-14  | 1.52E-13  |
| Unigene19201  | Potri.004G090700.1 | 10.3426 | 33.6655  | -1.7027 | Down | 1.09E-26  | 6.02E-26  |
| Unigene2978   | Potri.017G144800.2 | 7.7778  | 25.3207  | -1.7029 | Down | 6.26E-63  | 7.83E-62  |
| Unigene73236  | Potri.T081600.1    | 72.8229 | 237.0927 | -1.703  | Down | 8.98E-111 | 2.19E-109 |
| Unigene97993  | Potri.010G076700.5 | 2.4361  | 7.9321   | -1.7031 | Down | 1.47E-13  | 5.03E-13  |
| Unigene53011  | Potri.008G143000.1 | 6.0595  | 19.7299  | -1.7031 | Down | 1.47E-13  | 5.03E-13  |
| Unigene38477  | Potri.006G096100.1 | 3.1491  | 10.2536  | -1.7031 | Down | 1.47E-13  | 5.03E-13  |
| Unigene50614  | Potri.007G117200.1 | 31.5186 | 102.6293 | -1.7032 | Down | 2.00E-168 | 8.34E-167 |
| Unigene111533 | Potri.015G147200.1 | 35.3785 | 115.2091 | -1.7033 | Down | 1.42E-60  | 1.70E-59  |
| Unigene69796  | Potri.014G128500.1 | 3.6798  | 11.9835  | -1.7034 | Down | 2.71E-13  | 9.15E-13  |
| Unigene52948  | Potri.008G065200.2 | 4.716   | 15.3581  | -1.7034 | Down | 2.71E-13  | 9.15E-13  |
| Unigene92635  | Potri.008G011300.1 | 16.6787 | 54.3154  | -1.7034 | Down | 2.59E-60  | 3.10E-59  |
| Unigene85476  | Potri.016G069100.1 | 22.199  | 72.3056  | -1.7036 | Down | 1.51E-47  | 1.40E-46  |
| Unigene20332  | Potri.005G082500.1 | 10.837  | 35.2978  | -1.7036 | Down | 1.39E-24  | 7.18E-24  |
| Unigene34106  | Potri.001G326700.2 | 6.3394  | 20.6485  | -1.7036 | Down | 1.39E-24  | 7.18E-24  |
| Unigene2850   | Potri.010G065400.1 | 9.0327  | 29.4234  | -1.7037 | Down | 5.04E-47  | 4.63E-46  |
| Unigene36501  | Potri.001G244600.2 | 21.2783 | 69.3127  | -1.7037 | Down | 5.04E-47  | 4.63E-46  |
| Unigene1809   | Potri.010G208900.3 | 5.692   | 18.5415  | -1.7038 | Down | 2.55E-24  | 1.31E-23  |
| Unigene92027  | Potri.008G160500.1 | 27.8713 | 90.7954  | -1.7038 | Down | 1.69E-91  | 3.22E-90  |
| Unigene43892  | Potri.013G068900.4 | 1.3505  | 4.3996   | -1.7039 | Down | 9.20E-13  | 3.03E-12  |
| Unigene76636  | Potri.001G206600.1 | 13.8025 | 44.9649  | -1.7039 | Down | 4.68E-24  | 2.37E-23  |
| Unigene306    | Potri.019G064100.1 | 2.4907  | 8.1156   | -1.7041 | Down | 1.70E-12  | 5.52E-12  |
| Unigene39420  | Potri.013G022200.2 | 2.1211  | 6.9112   | -1.7041 | Down | 1.70E-12  | 5.52E-12  |
| Unigene91700  | Potri.004G084800.7 | 39.0184 | 127.1297 | -1.7041 | Down | 1.17E-122 | 3.24E-121 |
| Unigene21724  | Potri.008G039400.1 | 11.6452 | 37.9448  | -1.7042 | Down | 2.02E-143 | 6.78E-142 |
| Unigene87628  | Potri.006G227600.4 | 14.1481 | 46.1059  | -1.7043 | Down | 5.60E-34  | 3.78E-33  |
| Unigene44527  | Potri.002G108700.1 | 7.1594  | 23.3303  | -1.7043 | Down | 2.88E-23  | 1.43E-22  |
| Unigene35057  | Potri.017G133400.1 | 7.5078  | 24.4668  | -1.7044 | Down | 6.36E-77  | 9.97E-76  |

|               |                    |         |          |         |      |           |           |
|---------------|--------------------|---------|----------|---------|------|-----------|-----------|
| Unigene43684  | Potri.006G261300.2 | 2.4499  | 7.9843   | -1.7044 | Down | 3.13E-12  | 1.00E-11  |
| Unigene75303  | Potri.017G061900.1 | 53.0671 | 172.979  | -1.7047 | Down | 3.18E-85  | 5.61E-84  |
| Unigene20438  | Potri.014G075000.5 | 7.7583  | 25.2899  | -1.7047 | Down | 1.78E-22  | 8.58E-22  |
| Unigene77864  | Potri.001G134100.1 | 6.2433  | 20.3513  | -1.7047 | Down | 5.78E-12  | 1.83E-11  |
| Unigene21528  | Potri.011G123900.1 | 8.0477  | 26.2372  | -1.705  | Down | 8.75E-94  | 1.72E-92  |
| Unigene71253  | Potri.001G341100.3 | 49.4865 | 161.3376 | -1.705  | Down | 2.92E-73  | 4.32E-72  |
| Unigene60704  | Potri.010G219600.3 | 5.2691  | 17.1795  | -1.7051 | Down | 1.07E-11  | 3.33E-11  |
| Unigene70428  | Potri.005G226100.1 | 63.4092 | 206.7529 | -1.7051 | Down | 1.78E-92  | 3.43E-91  |
| Unigene693    | Potri.001G468000.1 | 23.71   | 77.3073  | -1.7051 | Down | 5.48E-244 | 3.67E-242 |
| Unigene52833  | Potri.001G159000.3 | 24.1874 | 78.8618  | -1.7051 | Down | 1.86E-52  | 1.91E-51  |
| Unigene18461  | Potri.006G031400.1 | 10.5635 | 34.4445  | -1.7052 | Down | 4.46E-62  | 5.50E-61  |
| Unigene47610  | Potri.006G087900.2 | 20.1814 | 65.8106  | -1.7053 | Down | 1.29E-31  | 8.22E-31  |
| Unigene86508  | Potri.017G042200.3 | 4.5698  | 14.9031  | -1.7054 | Down | 1.97E-11  | 6.07E-11  |
| Unigene27096  | Potri.016G112600.1 | 10.1851 | 33.2158  | -1.7054 | Down | 2.02E-21  | 9.40E-21  |
| Unigene25810  | Potri.014G049300.8 | 6.7321  | 21.9548  | -1.7054 | Down | 1.97E-11  | 6.07E-11  |
| Unigene84926  | Potri.010G167100.1 | 14.6299 | 47.7111  | -1.7054 | Down | 2.37E-31  | 1.49E-30  |
| Unigene12199  | Potri.006G216200.1 | 43.7677 | 142.7388 | -1.7054 | Down | 4.08E-110 | 9.88E-109 |
| Unigene49975  | Potri.014G133000.2 | 8.5362  | 27.8398  | -1.7055 | Down | 6.93E-51  | 6.89E-50  |
| Unigene19594  | Potri.010G206400.1 | 15.6658 | 51.0926  | -1.7055 | Down | 5.40E-41  | 4.34E-40  |
| Unigene10808  | Potri.008G145400.1 | 3.3339  | 10.8742  | -1.7056 | Down | 5.54E-60  | 6.58E-59  |
| Unigene34144  | Potri.002G232600.2 | 20.2126 | 65.9277  | -1.7056 | Down | 1.80E-79  | 2.94E-78  |
| Unigene44860  | Potri.003G055200.1 | 12.8472 | 41.9058  | -1.7057 | Down | 2.02E-98  | 4.24E-97  |
| Unigene33427  | Potri.016G000200.1 | 22.4214 | 73.1416  | -1.7058 | Down | 2.24E-145 | 7.70E-144 |
| Unigene44840  | Potri.014G125000.1 | 3.9034  | 12.7331  | -1.7058 | Down | 1.46E-30  | 8.97E-30  |
| Unigene1948   | Potri.011G156300.1 | 10.1726 | 33.1832  | -1.7058 | Down | 3.30E-40  | 2.60E-39  |
| Unigene105311 | Potri.004G055300.1 | 1.9631  | 6.4038   | -1.7058 | Down | 3.64E-11  | 1.11E-10  |
| Unigene8244   | Potri.001G074700.1 | 2.3272  | 7.5913   | -1.7058 | Down | 3.64E-11  | 1.11E-10  |
| Unigene13163  | Potri.010G121000.1 | 3.9775  | 12.9755  | -1.7059 | Down | 6.04E-40  | 4.73E-39  |
| Unigene98637  | Potri.006G038400.2 | 13.1755 | 42.9842  | -1.7059 | Down | 1.25E-20  | 5.67E-20  |
| Unigene37576  | Potri.018G025800.2 | 12.6108 | 41.142   | -1.706  | Down | 1.25E-20  | 5.67E-20  |
| Unigene29387  | Potri.016G038200.2 | 8.914   | 29.0832  | -1.706  | Down | 2.02E-39  | 1.56E-38  |
| Unigene19134  | Potri.008G138400.3 | 41.6877 | 136.0115 | -1.706  | Down | 9.11E-68  | 1.24E-66  |
| Unigene1375   | Potri.T141800.1    | 3.029   | 9.8831   | -1.7061 | Down | 6.72E-11  | 2.02E-10  |
| Unigene104736 | Potri.016G079200.6 | 2.2567  | 7.3632   | -1.7061 | Down | 2.29E-20  | 1.03E-19  |
| Unigene26009  | Potri.010G048500.2 | 10.6137 | 34.6312  | -1.7061 | Down | 2.29E-20  | 1.03E-19  |
| Unigene118685 | Potri.001G232800.1 | 2.7659  | 9.0246   | -1.7061 | Down | 6.72E-11  | 2.02E-10  |
| Unigene21836  | Potri.018G018600.3 | 1.2189  | 3.9772   | -1.7062 | Down | 6.72E-11  | 2.02E-10  |
| Unigene117399 | Potri.012G109200.1 | 3.6364  | 11.8653  | -1.7062 | Down | 6.72E-11  | 2.02E-10  |
| Unigene25282  | Potri.006G271400.1 | 4.7129  | 15.3777  | -1.7062 | Down | 2.29E-20  | 1.03E-19  |

|               |                     |         |          |         |      |           |           |
|---------------|---------------------|---------|----------|---------|------|-----------|-----------|
| Unigene28018  | Potri.001G173500.1  | 2.9205  | 9.5294   | -1.7062 | Down | 6.72E-11  | 2.02E-10  |
| Unigene44162  | Potri.007G077300.2  | 24.5443 | 80.0928  | -1.7063 | Down | 1.39E-103 | 3.11E-102 |
| Unigene11256  | Potri.013G159800.2  | 11.1759 | 36.4727  | -1.7064 | Down | 6.18E-66  | 8.16E-65  |
| Unigene9210   | Potri.003G064100.3  | 16.279  | 53.1262  | -1.7064 | Down | 3.00E-29  | 1.78E-28  |
| Unigene39765  | Potri.018G001600.1  | 2.0035  | 6.5388   | -1.7065 | Down | 1.24E-10  | 3.67E-10  |
| Unigene32891  | Potri.001G135300.3  | 10.6379 | 34.7185  | -1.7065 | Down | 1.13E-65  | 1.49E-64  |
| Unigene90459  | Potri.013G077000.2  | 13.1474 | 42.9132  | -1.7066 | Down | 7.58E-38  | 5.65E-37  |
| Unigene2215   | Potri.001G301500.1  | 12.9654 | 42.3183  | -1.7066 | Down | 4.68E-56  | 5.17E-55  |
| Unigene53175  | Potri.018G026400.4  | 26.0013 | 84.8725  | -1.7067 | Down | 1.08E-46  | 9.82E-46  |
| Unigene8104   | Potri.017G057500.1  | 5.405   | 17.6423  | -1.7067 | Down | 1.01E-28  | 5.89E-28  |
| Unigene74957  | Potri.015G136600.1  | 11.4636 | 37.4202  | -1.7068 | Down | 1.42E-19  | 6.21E-19  |
| Unigene48171  | Potri.009G057800.6  | 21.5774 | 70.4409  | -1.7069 | Down | 5.22E-55  | 5.64E-54  |
| Unigene80511  | Potri.002G246600.14 | 79.7127 | 260.2316 | -1.7069 | Down | 1.76E-143 | 5.93E-142 |
| Unigene55706  | Potri.002G019800.1  | 3.3     | 10.7735  | -1.7069 | Down | 2.30E-10  | 6.68E-10  |
| Unigene64872  | Potri.005G034100.1  | 3.5678  | 11.6479  | -1.707  | Down | 2.30E-10  | 6.68E-10  |
| Unigene75044  | Potri.008G119700.1  | 21.971  | 71.7462  | -1.7073 | Down | 2.84E-36  | 2.04E-35  |
| Unigene54031  | Potri.015G120400.4  | 4.4872  | 14.654   | -1.7074 | Down | 4.25E-10  | 1.22E-09  |
| Unigene32965  | Potri.014G073300.1  | 12.3899 | 40.4648  | -1.7075 | Down | 4.89E-104 | 1.10E-102 |
| Unigene11888  | Potri.014G058800.1  | 2.0851  | 6.8104   | -1.7076 | Down | 1.61E-18  | 6.78E-18  |
| Unigene1457   | Potri.003G220800.1  | 15.2777 | 49.8979  | -1.7076 | Down | 3.18E-61  | 3.86E-60  |
| Unigene112363 | Potri.018G127200.2  | 19.2663 | 62.9347  | -1.7078 | Down | 3.19E-35  | 2.22E-34  |
| Unigene10858  | Potri.001G359700.2  | 9.2065  | 30.0751  | -1.7078 | Down | 4.34E-85  | 7.63E-84  |
| Unigene68250  | Potri.008G178000.2  | 5.3532  | 17.488   | -1.7079 | Down | 1.28E-26  | 7.02E-26  |
| Unigene12613  | Potri.004G139900.1  | 1.768   | 5.7759   | -1.7079 | Down | 7.86E-10  | 2.22E-09  |
| Unigene42967  | Potri.004G049400.1  | 2.476   | 8.0887   | -1.7079 | Down | 2.96E-18  | 1.23E-17  |
| Unigene52026  | Potri.003G070400.1  | 2.1413  | 6.9952   | -1.7079 | Down | 7.86E-10  | 2.22E-09  |
| Unigene118076 | Potri.002G107400.8  | 2.855   | 9.3269   | -1.7079 | Down | 7.86E-10  | 2.22E-09  |
| Unigene43177  | Potri.010G057700.1  | 8.3203  | 27.1824  | -1.708  | Down | 5.61E-167 | 2.32E-165 |
| Unigene12018  | Potri.003G192900.4  | 12.6613 | 41.365   | -1.708  | Down | 2.42E-51  | 2.43E-50  |
| Unigene1229   | Potri.005G209200.1  | 7.6032  | 24.8412  | -1.7081 | Down | 9.65E-76  | 1.48E-74  |
| Unigene12220  | Potri.001G199200.1  | 22.7717 | 74.4078  | -1.7082 | Down | 1.25E-107 | 2.93E-106 |
| Unigene7859   | Potri.007G116400.1  | 5.962   | 19.4821  | -1.7083 | Down | 3.58E-34  | 2.43E-33  |
| Unigene17875  | Potri.010G207200.4  | 16.9457 | 55.3821  | -1.7085 | Down | 9.04E-50  | 8.78E-49  |
| Unigene116151 | Potri.003G126900.1  | 14.3646 | 46.9478  | -1.7085 | Down | 1.20E-33  | 8.03E-33  |
| Unigene18227  | Potri.005G092900.2  | 7.6412  | 24.9762  | -1.7087 | Down | 1.84E-17  | 7.42E-17  |
| Unigene21961  | Potri.005G087300.1  | 3.2411  | 10.5937  | -1.7087 | Down | 1.84E-17  | 7.42E-17  |
| Unigene10943  | Potri.008G101200.1  | 25.2929 | 82.6818  | -1.7088 | Down | 6.39E-182 | 2.95E-180 |
| Unigene1704   | Potri.010G026800.4  | 10.5633 | 34.5342  | -1.709  | Down | 1.15E-40  | 9.19E-40  |
| Unigene105123 | Potri.008G021600.1  | 1.1015  | 3.6011   | -1.709  | Down | 2.69E-09  | 7.39E-09  |

|               |                     |         |          |         |      |           |           |
|---------------|---------------------|---------|----------|---------|------|-----------|-----------|
| Unigene79013  | Potri.003G082100.1  | 26.8868 | 87.9051  | -1.709  | Down | 3.37E-48  | 3.18E-47  |
| Unigene46394  | Potri.003G056400.1  | 15.3794 | 50.2791  | -1.709  | Down | 4.84E-25  | 2.54E-24  |
| Unigene16138  | Potri.001G091100.1  | 4.7862  | 15.6473  | -1.709  | Down | 2.69E-09  | 7.39E-09  |
| Unigene86880  | Potri.010G001400.3  | 27.7013 | 90.5803  | -1.7092 | Down | 5.46E-63  | 6.85E-62  |
| Unigene80670  | Potri.001G085400.4  | 12.831  | 41.9534  | -1.7092 | Down | 8.88E-25  | 4.62E-24  |
| Unigene28944  | Potri.009G092500.4  | 4.782   | 15.6377  | -1.7093 | Down | 2.06E-47  | 1.91E-46  |
| Unigene22143  | Potri.006G244100.1  | 8.1606  | 26.6865  | -1.7094 | Down | 6.10E-55  | 6.58E-54  |
| Unigene28156  | Potri.001G448900.1  | 12.7035 | 41.5441  | -1.7094 | Down | 1.29E-39  | 1.00E-38  |
| Unigene53989  | Potri.010G169100.2  | 4.2455  | 13.8851  | -1.7095 | Down | 4.99E-09  | 1.35E-08  |
| Unigene20766  | Potri.006G239900.3  | 13.3468 | 43.6517  | -1.7095 | Down | 8.27E-32  | 5.28E-31  |
| Unigene119392 | Potri.003G090400.12 | 1.4229  | 4.6536   | -1.7095 | Down | 4.99E-09  | 1.35E-08  |
| Unigene40033  | Potri.003G012300.1  | 1.6791  | 5.4915   | -1.7095 | Down | 4.99E-09  | 1.35E-08  |
| Unigene14857  | Potri.002G099000.2  | 6.9279  | 22.6583  | -1.7095 | Down | 8.27E-32  | 5.28E-31  |
| Unigene1005   | Potri.007G004900.1  | 4.5107  | 14.7535  | -1.7096 | Down | 1.11E-61  | 1.36E-60  |
| Unigene51296  | Potri.012G036300.1  | 9.1195  | 29.8291  | -1.7097 | Down | 1.51E-31  | 9.60E-31  |
| Unigene113781 | Potri.006G104000.3  | 11.9072 | 38.9487  | -1.7097 | Down | 5.47E-24  | 2.77E-23  |
| Unigene36464  | Potri.001G136600.1  | 36.5316 | 119.4919 | -1.7097 | Down | 3.14E-91  | 5.98E-90  |
| Unigene1967   | Potri.017G111400.4  | 35.1026 | 114.8224 | -1.7098 | Down | 8.95E-195 | 4.51E-193 |
| Unigene9709   | Potri.006G232300.3  | 25.1701 | 82.3337  | -1.7098 | Down | 1.72E-120 | 4.65E-119 |
| Unigene2629   | Potri.003G194000.5  | 2.2544  | 7.3746   | -1.7098 | Down | 2.10E-16  | 8.12E-16  |
| Unigene22185  | Potri.001G001700.1  | 6.9181  | 22.6294  | -1.7098 | Down | 2.30E-46  | 2.08E-45  |
| Unigene49216  | Potri.018G026900.1  | 15.1633 | 49.6055  | -1.7099 | Down | 1.45E-38  | 1.10E-37  |
| Unigene46668  | Potri.005G231000.1  | 17.9168 | 58.6107  | -1.7099 | Down | 2.77E-31  | 1.74E-30  |
| Unigene70727  | Potri.005G184500.1  | 10.2063 | 33.3877  | -1.7099 | Down | 2.10E-16  | 8.12E-16  |
| Unigene13605  | Potri.002G032100.1  | 9.7592  | 31.928   | -1.71   | Down | 4.15E-53  | 4.32E-52  |
| Unigene14464  | Potri.012G071900.1  | 1.967   | 6.4359   | -1.7101 | Down | 9.26E-09  | 2.46E-08  |
| Unigene10066  | Potri.007G084800.1  | 1.1367  | 3.7192   | -1.7101 | Down | 9.26E-09  | 2.46E-08  |
| Unigene21612  | Potri.016G016700.1  | 14.8648 | 48.6374  | -1.7102 | Down | 7.03E-118 | 1.85E-116 |
| Unigene65956  | Potri.012G072200.1  | 4.6197  | 15.1155  | -1.7102 | Down | 9.26E-09  | 2.46E-08  |
| Unigene4141   | Potri.009G021700.3  | 7.6295  | 24.9635  | -1.7102 | Down | 3.86E-16  | 1.48E-15  |
| Unigene16424  | Potri.008G208100.1  | 2.1473  | 7.026    | -1.7102 | Down | 9.26E-09  | 2.46E-08  |
| Unigene2965   | Potri.008G171700.5  | 1.8684  | 6.1135   | -1.7102 | Down | 9.26E-09  | 2.46E-08  |
| Unigene9512   | Potri.006G193600.2  | 12.5364 | 41.0189  | -1.7102 | Down | 1.84E-23  | 9.16E-23  |
| Unigene54103  | Potri.001G068900.1  | 4.557   | 14.9103  | -1.7102 | Down | 1.84E-23  | 9.16E-23  |
| Unigene102451 | Potri.001G037500.1  | 1.2003  | 3.9275   | -1.7102 | Down | 9.26E-09  | 2.46E-08  |
| Unigene10944  | Potri.T044200.3     | 7.2323  | 23.6659  | -1.7103 | Down | 1.36E-131 | 4.12E-130 |
| Unigene51024  | Potri.016G011100.1  | 14.4081 | 47.1487  | -1.7103 | Down | 1.70E-30  | 1.05E-29  |
| Unigene1286   | Potri.015G103500.5  | 7.5588  | 24.7352  | -1.7103 | Down | 1.70E-30  | 1.05E-29  |
| Unigene109    | Potri.018G008600.1  | 7.4944  | 24.5256  | -1.7104 | Down | 1.12E-223 | 6.62E-222 |

|               |                    |         |          |         |      |           |           |
|---------------|--------------------|---------|----------|---------|------|-----------|-----------|
| Unigene53821  | Potri.004G227000.1 | 9.6568  | 31.602   | -1.7104 | Down | 3.37E-23  | 1.67E-22  |
| Unigene110399 | Potri.019G028100.1 | 30.9436 | 101.2739 | -1.7105 | Down | 1.55E-51  | 1.56E-50  |
| Unigene2238   | Potri.015G110900.2 | 6.7538  | 22.1046  | -1.7106 | Down | 2.97E-37  | 2.18E-36  |
| Unigene18485  | Potri.004G149400.1 | 3.0759  | 10.0673  | -1.7106 | Down | 6.19E-23  | 3.03E-22  |
| Unigene45426  | Potri.003G030800.1 | 4.6736  | 15.2972  | -1.7107 | Down | 5.71E-30  | 3.46E-29  |
| Unigene13546  | Potri.001G160300.4 | 6.632   | 21.7082  | -1.7107 | Down | 5.26E-44  | 4.51E-43  |
| Unigene20872  | Potri.018G002800.1 | 3.6874  | 12.0708  | -1.7108 | Down | 1.72E-08  | 4.48E-08  |
| Unigene22095  | Potri.015G044100.1 | 14.3816 | 47.0768  | -1.7108 | Down | 4.36E-177 | 1.94E-175 |
| Unigene41658  | Potri.012G062500.2 | 3.1487  | 10.3072  | -1.7108 | Down | 1.72E-08  | 4.48E-08  |
| Unigene101443 | Potri.005G111000.1 | 2.172   | 7.11     | -1.7108 | Down | 1.30E-15  | 4.88E-15  |
| Unigene44280  | Potri.015G066200.2 | 6.8055  | 22.2781  | -1.7109 | Down | 1.30E-15  | 4.88E-15  |
| Unigene1369   | Potri.008G048200.1 | 1.4199  | 4.6481   | -1.7109 | Down | 1.72E-08  | 4.48E-08  |
| Unigene11116  | Potri.006G082800.1 | 6.0306  | 19.7419  | -1.7109 | Down | 1.89E-106 | 4.37E-105 |
| Unigene21413  | Potri.015G105300.4 | 19.5444 | 63.9849  | -1.711  | Down | 3.19E-78  | 5.10E-77  |
| Unigene23743  | Potri.007G076500.1 | 4.3443  | 14.2239  | -1.7111 | Down | 3.32E-36  | 2.38E-35  |
| Unigene15694  | Potri.014G139000.1 | 41.4162 | 135.6083 | -1.7112 | Down | 3.67E-91  | 6.98E-90  |
| Unigene2905   | Potri.010G203200.5 | 2.366   | 7.7471   | -1.7112 | Down | 2.40E-15  | 8.88E-15  |
| Unigene7862   | Potri.008G133000.2 | 2.2249  | 7.285    | -1.7112 | Down | 2.40E-15  | 8.88E-15  |
| Unigene53952  | Potri.006G211200.1 | 8.5688  | 28.0572  | -1.7112 | Down | 2.40E-15  | 8.88E-15  |
| Unigene54747  | Potri.006G063700.2 | 2.6384  | 8.639    | -1.7112 | Down | 2.40E-15  | 8.88E-15  |
| Unigene40228  | Potri.004G121300.1 | 3.9385  | 12.8959  | -1.7112 | Down | 2.40E-15  | 8.88E-15  |
| Unigene2117   | Potri.016G033300.3 | 9.6987  | 31.7615  | -1.7114 | Down | 6.38E-63  | 7.98E-62  |
| Unigene29234  | Potri.008G060300.4 | 3.8272  | 12.5333  | -1.7114 | Down | 1.11E-35  | 7.86E-35  |
| Unigene32379  | Potri.005G232800.1 | 8.8778  | 29.0723  | -1.7114 | Down | 1.18E-76  | 1.85E-75  |
| Unigene17806  | Potri.018G093700.1 | 1.25    | 4.0939   | -1.7115 | Down | 3.19E-08  | 8.18E-08  |
| Unigene24028  | Potri.016G100100.1 | 1.6862  | 5.5227   | -1.7116 | Down | 3.19E-08  | 8.18E-08  |
| Unigene74014  | Potri.013G128600.2 | 143.795 | 470.9556 | -1.7116 | Down | 8.33E-224 | 4.94E-222 |
| Unigene34177  | Potri.011G080600.2 | 6.2416  | 20.4423  | -1.7116 | Down | 2.04E-35  | 1.43E-34  |
| Unigene39983  | Potri.007G056800.5 | 2.5618  | 8.3903   | -1.7116 | Down | 3.19E-08  | 8.18E-08  |
| Unigene13390  | Potri.001G326700.2 | 5.1661  | 16.9201  | -1.7116 | Down | 1.18E-28  | 6.87E-28  |
| Unigene61551  | Potri.001G188400.2 | 4.5266  | 14.8256  | -1.7116 | Down | 3.19E-08  | 8.18E-08  |
| Unigene4325   | Potri.001G218700.5 | 20.4325 | 66.9261  | -1.7117 | Down | 4.45E-82  | 7.49E-81  |
| Unigene21891  | Potri.013G118900.1 | 10.9422 | 35.8441  | -1.7118 | Down | 1.48E-81  | 2.48E-80  |
| Unigene71672  | Potri.006G109600.3 | 22.4894 | 73.6729  | -1.7119 | Down | 6.82E-35  | 4.71E-34  |
| Unigene5415   | Potri.018G138100.2 | 8.123   | 26.6115  | -1.712  | Down | 8.13E-15  | 2.94E-14  |
| Unigene5021   | Potri.010G104500.1 | 4.98    | 16.315   | -1.712  | Down | 8.13E-15  | 2.94E-14  |
| Unigene19060  | Potri.008G161700.1 | 4.0979  | 13.4251  | -1.712  | Down | 8.13E-15  | 2.94E-14  |
| Unigene34855  | Potri.002G040100.1 | 1.9953  | 6.5367   | -1.712  | Down | 8.13E-15  | 2.94E-14  |
| Unigene28542  | Potri.001G213200.4 | 6.6704  | 21.8525  | -1.712  | Down | 3.95E-28  | 2.27E-27  |



|              |                    |         |          |         |      |           |           |
|--------------|--------------------|---------|----------|---------|------|-----------|-----------|
| Unigene1310  | Potri.018G100600.1 | 4.8623  | 15.9306  | -1.7121 | Down | 2.36E-21  | 1.10E-20  |
| Unigene48906 | Potri.007G079800.1 | 14.825  | 48.5723  | -1.7121 | Down | 7.92E-61  | 9.55E-60  |
| Unigene2268  | Potri.001G123500.1 | 27.3316 | 89.5507  | -1.7121 | Down | 1.90E-93  | 3.72E-92  |
| Unigene209   | Potri.010G170000.1 | 6.8897  | 22.5754  | -1.7122 | Down | 7.37E-41  | 5.90E-40  |
| Unigene90870 | Potri.012G112400.1 | 15.8781 | 52.0282  | -1.7123 | Down | 2.41E-47  | 2.23E-46  |
| Unigene18724 | Potri.015G049900.1 | 2.0532  | 6.7283   | -1.7124 | Down | 5.93E-08  | 1.49E-07  |
| Unigene49999 | Potri.005G170100.1 | 2.1493  | 7.0433   | -1.7124 | Down | 1.50E-14  | 5.35E-14  |
| Unigene53161 | Potri.005G122300.1 | 7.6186  | 24.9661  | -1.7124 | Down | 1.50E-14  | 5.35E-14  |
| Unigene50774 | Potri.005G095300.6 | 3.756   | 12.3085  | -1.7124 | Down | 4.33E-21  | 2.00E-20  |
| Unigene44165 | Potri.004G208900.1 | 25.3104 | 82.9537  | -1.7126 | Down | 1.76E-155 | 6.62E-154 |
| Unigene12625 | Potri.006G115000.1 | 17.3509 | 56.8718  | -1.7127 | Down | 2.66E-97  | 5.49E-96  |
| Unigene52237 | Potri.005G231500.1 | 9.391   | 30.7802  | -1.7127 | Down | 7.95E-21  | 3.63E-20  |
| Unigene53715 | Potri.018G152600.2 | 6.9292  | 22.7134  | -1.7128 | Down | 2.76E-14  | 9.73E-14  |
| Unigene3615  | Potri.010G160500.1 | 41.0699 | 134.6277 | -1.7128 | Down | 4.20E-84  | 7.28E-83  |
| Unigene36324 | Potri.018G101100.3 | 27.9747 | 91.7084  | -1.7129 | Down | 1.80E-58  | 2.08E-57  |
| Unigene68931 | Potri.017G070800.1 | 3.44    | 11.2773  | -1.7129 | Down | 1.51E-39  | 1.17E-38  |
| Unigene2599  | Potri.014G154000.1 | 3.8654  | 12.6713  | -1.7129 | Down | 2.57E-33  | 1.71E-32  |
| Unigene22653 | Potri.002G016000.1 | 44.5856 | 146.1564 | -1.7129 | Down | 4.20E-292 | 3.60E-290 |
| Unigene29511 | Potri.002G257400.3 | 10.7896 | 35.373   | -1.713  | Down | 5.41E-52  | 5.51E-51  |
| Unigene39132 | Potri.T034200.1    | 2.0924  | 6.8609   | -1.7132 | Down | 1.10E-07  | 2.72E-07  |
| Unigene25562 | Potri.015G065400.4 | 23.8303 | 78.1379  | -1.7132 | Down | 5.05E-39  | 3.87E-38  |
| Unigene52529 | Potri.011G136000.2 | 5.8559  | 19.2011  | -1.7132 | Down | 5.08E-14  | 1.77E-13  |
| Unigene7846  | Potri.007G119300.1 | 6.0557  | 19.8562  | -1.7132 | Down | 5.05E-39  | 3.87E-38  |
| Unigene11219 | Potri.010G166100.6 | 20.8752 | 68.4499  | -1.7133 | Down | 1.61E-181 | 7.43E-180 |
| Unigene13634 | Potri.007G063000.1 | 7.4599  | 24.4618  | -1.7133 | Down | 4.60E-76  | 7.12E-75  |
| Unigene73261 | Potri.008G031700.5 | 12.0779 | 39.6111  | -1.7135 | Down | 4.91E-20  | 2.19E-19  |
| Unigene13332 | Potri.016G082900.1 | 26.7982 | 87.8951  | -1.7136 | Down | 6.61E-148 | 2.33E-146 |
| Unigene42398 | Potri.012G091800.1 | 14.9234 | 48.948   | -1.7137 | Down | 1.14E-226 | 6.85E-225 |
| Unigene46697 | Potri.009G026100.1 | 6.5438  | 21.4634  | -1.7137 | Down | 5.02E-26  | 2.71E-25  |
| Unigene65985 | Potri.007G132100.3 | 4.6495  | 15.2503  | -1.7137 | Down | 9.35E-14  | 3.23E-13  |
| Unigene2832  | Potri.007G120000.1 | 1.8009  | 5.9071   | -1.7137 | Down | 9.35E-14  | 3.23E-13  |
| Unigene48860 | Potri.007G071800.2 | 3.2592  | 10.69    | -1.7137 | Down | 9.35E-14  | 3.23E-13  |
| Unigene33438 | Potri.004G015500.1 | 3.1759  | 10.417   | -1.7137 | Down | 5.02E-26  | 2.71E-25  |
| Unigene45452 | Potri.003G110000.5 | 21.7045 | 71.1902  | -1.7137 | Down | 9.35E-75  | 1.42E-73  |
| Unigene8150  | Potri.001G035000.3 | 3.008   | 9.8663   | -1.7137 | Down | 9.35E-14  | 3.23E-13  |
| Unigene85960 | Potri.018G045800.2 | 8.4428  | 27.6952  | -1.7138 | Down | 9.02E-20  | 3.98E-19  |
| Unigene24985 | Potri.014G130800.1 | 1.6478  | 5.4064   | -1.7141 | Down | 2.05E-07  | 4.97E-07  |
| Unigene29039 | Potri.014G032300.1 | 3.3022  | 10.8346  | -1.7141 | Down | 1.68E-25  | 8.95E-25  |
| Unigene163   | Potri.001G359900.1 | 7.4655  | 24.4936  | -1.7141 | Down | 4.93E-145 | 1.69E-143 |

|               |                    |          |          |         |      |           |           |
|---------------|--------------------|----------|----------|---------|------|-----------|-----------|
| Unigene35996  | Potri.006G077800.1 | 6.5299   | 21.425   | -1.7142 | Down | 1.66E-19  | 7.24E-19  |
| Unigene53763  | Potri.005G087500.1 | 3.0058   | 9.8623   | -1.7142 | Down | 2.05E-07  | 4.97E-07  |
| Unigene6788   | Potri.001G084700.3 | 4.623    | 15.1685  | -1.7142 | Down | 1.72E-13  | 5.88E-13  |
| Unigene75752  | Potri.001G415700.1 | 32.9311  | 108.0656 | -1.7144 | Down | 8.31E-55  | 8.95E-54  |
| Unigene50717  | Potri.012G058000.3 | 3.5865   | 11.7702  | -1.7145 | Down | 3.04E-19  | 1.32E-18  |
| Unigene21550  | Potri.010G220700.1 | 21.0846  | 69.1968  | -1.7145 | Down | 2.56E-218 | 1.48E-216 |
| Unigene67452  | Potri.010G167000.4 | 6.6974   | 21.9798  | -1.7145 | Down | 3.04E-19  | 1.32E-18  |
| Unigene44082  | Potri.019G021200.1 | 2.1822   | 7.1623   | -1.7146 | Down | 3.18E-13  | 1.07E-12  |
| Unigene40892  | Potri.013G141300.1 | 16.1781  | 53.0961  | -1.7146 | Down | 5.93E-31  | 3.70E-30  |
| Unigene23583  | Potri.019G010700.4 | 5.3133   | 17.4403  | -1.7147 | Down | 2.30E-42  | 1.90E-41  |
| Unigene8757   | Potri.017G129100.7 | 2.0328   | 6.6721   | -1.7147 | Down | 3.18E-13  | 1.07E-12  |
| Unigene25592  | Potri.007G035200.1 | 7.2574   | 23.8202  | -1.7147 | Down | 3.18E-13  | 1.07E-12  |
| Unigene30249  | Potri.005G108700.2 | 4.4801   | 14.7046  | -1.7147 | Down | 3.18E-13  | 1.07E-12  |
| Unigene70634  | Potri.018G145200.1 | 103.6927 | 340.3687 | -1.7148 | Down | 3.27E-152 | 1.20E-150 |
| Unigene8274   | Potri.014G027900.1 | 2.3682   | 7.7739   | -1.7148 | Down | 5.59E-19  | 2.40E-18  |
| Unigene21623  | Potri.006G091900.1 | 4.6716   | 15.3349  | -1.7148 | Down | 9.27E-54  | 9.78E-53  |
| Unigene73007  | Potri.001G241700.1 | 11.4219  | 37.4934  | -1.7148 | Down | 5.59E-19  | 2.40E-18  |
| Unigene43759  | Potri.019G059700.1 | 3.3836   | 11.1078  | -1.7149 | Down | 1.04E-24  | 5.38E-24  |
| Unigene39510  | Potri.015G110100.1 | 10.0473  | 32.9824  | -1.7149 | Down | 9.47E-146 | 3.27E-144 |
| Unigene1239   | Potri.010G023100.2 | 17.9724  | 58.9967  | -1.7149 | Down | 2.62E-163 | 1.05E-161 |
| Unigene591    | Potri.006G063500.2 | 13.0643  | 42.888   | -1.7149 | Down | 1.61E-76  | 2.51E-75  |
| Unigene39087  | Potri.018G087700.3 | 3.5685   | 11.7169  | -1.7152 | Down | 5.85E-13  | 1.95E-12  |
| Unigene119212 | Potri.015G147400.2 | 1.2553   | 4.1216   | -1.7152 | Down | 3.82E-07  | 9.07E-07  |
| Unigene11922  | Potri.015G046700.1 | 6.5547   | 21.5218  | -1.7152 | Down | 2.81E-47  | 2.60E-46  |
| Unigene61615  | Potri.006G113000.2 | 6.4735   | 21.255   | -1.7152 | Down | 5.85E-13  | 1.95E-12  |
| Unigene41356  | Potri.002G051200.1 | 1.4372   | 4.719    | -1.7152 | Down | 3.82E-07  | 9.07E-07  |
| Unigene39214  | Potri.001G455100.1 | 1.6302   | 5.3525   | -1.7152 | Down | 5.85E-13  | 1.95E-12  |
| Unigene102028 | Potri.001G271500.2 | 3.7123   | 12.1889  | -1.7152 | Down | 3.82E-07  | 9.07E-07  |
| Unigene44156  | Potri.T169700.1    | 13.4913  | 44.3048  | -1.7154 | Down | 1.89E-52  | 1.94E-51  |
| Unigene41933  | Potri.009G012700.5 | 35.7045  | 117.2509 | -1.7154 | Down | 1.23E-80  | 2.03E-79  |
| Unigene41122  | Potri.001G144700.1 | 3.8407   | 12.6126  | -1.7154 | Down | 6.67E-30  | 4.03E-29  |
| Unigene11021  | Potri.001G012200.2 | 13.284   | 43.6225  | -1.7154 | Down | 7.80E-64  | 9.93E-63  |
| Unigene1565   | Potri.007G086700.2 | 4.6159   | 15.1597  | -1.7156 | Down | 1.88E-18  | 7.92E-18  |
| Unigene32907  | Potri.004G212700.4 | 9.1741   | 30.1304  | -1.7156 | Down | 4.10E-80  | 6.74E-79  |
| Unigene44099  | Potri.016G103900.1 | 2.592    | 8.5138   | -1.7157 | Down | 1.08E-12  | 3.54E-12  |
| Unigene13636  | Potri.014G057000.1 | 3.9964   | 13.126   | -1.7157 | Down | 8.60E-41  | 6.87E-40  |
| Unigene38283  | Potri.006G119600.2 | 2.3673   | 7.7758   | -1.7157 | Down | 1.08E-12  | 3.54E-12  |
| Unigene15548  | Potri.003G151700.1 | 19.2514  | 63.2305  | -1.7157 | Down | 8.60E-41  | 6.87E-40  |
| Unigene6044   | Potri.003G067700.5 | 23.8769  | 78.4237  | -1.7157 | Down | 6.32E-52  | 6.42E-51  |

|               |                    |         |          |         |      |           |           |
|---------------|--------------------|---------|----------|---------|------|-----------|-----------|
| Unigene64063  | Potri.001G026100.6 | 7.4237  | 24.3842  | -1.7157 | Down | 1.08E-12  | 3.54E-12  |
| Unigene85368  | Potri.014G036000.1 | 66.1808 | 217.3908 | -1.7158 | Down | 2.89E-140 | 9.47E-139 |
| Unigene12089  | Potri.012G004700.6 | 11.4338 | 37.5573  | -1.7158 | Down | 8.69E-63  | 1.08E-61  |
| Unigene13882  | Potri.011G139900.1 | 4.9154  | 16.1468  | -1.7159 | Down | 2.24E-29  | 1.33E-28  |
| Unigene45367  | Potri.005G009000.1 | 3.5797  | 11.7604  | -1.716  | Down | 1.17E-23  | 5.88E-23  |
| Unigene40443  | Potri.010G098200.2 | 23.6885 | 77.8324  | -1.7162 | Down | 7.05E-51  | 7.01E-50  |
| Unigene3127   | Potri.001G369200.1 | 13.4183 | 44.0882  | -1.7162 | Down | 1.98E-154 | 7.37E-153 |
| Unigene41003  | Potri.015G059400.2 | 2.7176  | 8.93     | -1.7163 | Down | 1.99E-12  | 6.45E-12  |
| Unigene37853  | Potri.013G057000.2 | 34.4786 | 113.2953 | -1.7163 | Down | 1.77E-61  | 2.16E-60  |
| Unigene16896  | Potri.011G031000.3 | 3.5023  | 11.5084  | -1.7163 | Down | 7.12E-07  | 1.66E-06  |
| Unigene91411  | Potri.010G106300.3 | 1.7762  | 5.8364   | -1.7163 | Down | 7.12E-07  | 1.66E-06  |
| Unigene35809  | Potri.007G019100.2 | 5.6729  | 18.641   | -1.7163 | Down | 2.67E-34  | 1.82E-33  |
| Unigene51943  | Potri.006G264800.1 | 1.7804  | 5.8504   | -1.7163 | Down | 7.12E-07  | 1.66E-06  |
| Unigene10062  | Potri.004G069400.1 | 5.9206  | 19.4547  | -1.7163 | Down | 6.36E-18  | 2.62E-17  |
| Unigene32489  | Potri.002G174100.2 | 6.1682  | 20.2685  | -1.7163 | Down | 4.96E-94  | 9.78E-93  |
| Unigene32400  | Potri.001G473300.2 | 4.9966  | 16.4186  | -1.7163 | Down | 4.76E-56  | 5.26E-55  |
| Unigene104431 | Potri.001G458200.2 | 2.4299  | 7.9847   | -1.7163 | Down | 7.12E-07  | 1.66E-06  |
| Unigene21692  | Potri.003G048800.1 | 8.4675  | 27.8247  | -1.7164 | Down | 6.94E-186 | 3.31E-184 |
| Unigene19489  | Potri.016G133300.1 | 4.7113  | 15.484   | -1.7166 | Down | 5.63E-77  | 8.84E-76  |
| Unigene43824  | Potri.012G081000.1 | 14.4803 | 47.5909  | -1.7166 | Down | 1.50E-71  | 2.16E-70  |
| Unigene40166  | Potri.008G163300.2 | 21.818  | 71.7141  | -1.7167 | Down | 1.83E-92  | 3.55E-91  |
| Unigene53087  | Potri.008G009400.1 | 6.7036  | 22.037   | -1.7169 | Down | 3.67E-12  | 1.17E-11  |
| Unigene4334   | Potri.001G081900.1 | 4.7695  | 15.6788  | -1.7169 | Down | 3.67E-12  | 1.17E-11  |
| Unigene15881  | Potri.005G211500.2 | 55.2395 | 181.5982 | -1.717  | Down | 5.32E-118 | 1.40E-116 |
| Unigene18482  | Potri.014G145900.1 | 6.4707  | 21.2745  | -1.7171 | Down | 4.81E-49  | 4.60E-48  |
| Unigene20571  | Potri.001G262600.1 | 6.988   | 22.9769  | -1.7172 | Down | 1.33E-22  | 6.43E-22  |
| Unigene9846   | Potri.016G005300.1 | 1.6107  | 5.2971   | -1.7175 | Down | 1.33E-06  | 3.02E-06  |
| Unigene66352  | Potri.005G190000.1 | 1.8456  | 6.0696   | -1.7175 | Down | 1.33E-06  | 3.02E-06  |
| Unigene49215  | Potri.002G033800.1 | 1.5274  | 5.0232   | -1.7175 | Down | 1.33E-06  | 3.02E-06  |
| Unigene105065 | Potri.001G088000.1 | 1.5373  | 5.0558   | -1.7175 | Down | 1.33E-06  | 3.02E-06  |
| Unigene118431 | Potri.019G024200.2 | 1.607   | 5.2851   | -1.7176 | Down | 1.33E-06  | 3.02E-06  |
| Unigene14423  | Potri.009G013000.2 | 25.7706 | 84.7543  | -1.7176 | Down | 1.98E-53  | 2.07E-52  |
| Unigene39019  | Potri.004G208000.1 | 1.8552  | 6.1014   | -1.7176 | Down | 1.33E-06  | 3.02E-06  |
| Unigene83264  | Potri.001G177000.4 | 62.9082 | 206.9238 | -1.7178 | Down | 1.17E-124 | 3.29E-123 |
| Unigene36391  | Potri.011G115100.5 | 9.8157  | 32.2892  | -1.7179 | Down | 4.47E-22  | 2.13E-21  |
| Unigene28258  | Potri.T164600.1    | 29.5387 | 97.1782  | -1.718  | Down | 3.06E-103 | 6.80E-102 |
| Unigene49017  | Potri.007G107100.1 | 5.0946  | 16.7602  | -1.718  | Down | 7.26E-17  | 2.86E-16  |
| Unigene16402  | Potri.006G113600.2 | 7.6793  | 25.2635  | -1.718  | Down | 7.26E-17  | 2.86E-16  |
| Unigene49947  | Potri.006G191500.4 | 28.3034 | 93.1193  | -1.7181 | Down | 4.90E-113 | 1.22E-111 |

|               |                    |         |          |         |      |           |           |
|---------------|--------------------|---------|----------|---------|------|-----------|-----------|
| Unigene34543  | Potri.001G317600.1 | 24.0706 | 79.1916  | -1.7181 | Down | 2.08E-133 | 6.41E-132 |
| Unigene5039   | Potri.017G140800.1 | 54.2539 | 178.5087 | -1.7182 | Down | 1.48E-97  | 3.06E-96  |
| Unigene19741  | Potri.005G080100.2 | 9.4743  | 31.1734  | -1.7182 | Down | 6.16E-32  | 3.95E-31  |
| Unigene48256  | Potri.001G022700.2 | 4.1074  | 13.5147  | -1.7182 | Down | 1.25E-11  | 3.90E-11  |
| Unigene46821  | Potri.008G120400.1 | 24.114  | 79.3466  | -1.7183 | Down | 4.98E-57  | 5.60E-56  |
| Unigene44398  | Potri.019G020100.1 | 2.6437  | 8.6999   | -1.7184 | Down | 1.33E-16  | 5.21E-16  |
| Unigene53251  | Potri.012G065600.4 | 12.3883 | 40.7655  | -1.7184 | Down | 9.52E-27  | 5.26E-26  |
| Unigene36931  | Potri.007G137200.2 | 19.2387 | 63.3093  | -1.7184 | Down | 8.97E-42  | 7.34E-41  |
| Unigene51384  | Potri.013G076900.1 | 5.2602  | 17.3106  | -1.7185 | Down | 1.33E-16  | 5.21E-16  |
| Unigene8114   | Potri.001G146100.1 | 5.2737  | 17.3551  | -1.7185 | Down | 1.33E-16  | 5.21E-16  |
| Unigene33315  | Potri.015G072200.1 | 3.3574  | 11.0497  | -1.7186 | Down | 1.50E-21  | 7.04E-21  |
| Unigene29671  | Potri.008G160900.1 | 3.0594  | 10.0689  | -1.7186 | Down | 1.50E-21  | 7.04E-21  |
| Unigene43786  | Potri.005G226000.1 | 20.2627 | 66.6857  | -1.7186 | Down | 1.66E-56  | 1.85E-55  |
| Unigene27713  | Potri.002G093700.1 | 3.012   | 9.9129   | -1.7186 | Down | 1.50E-21  | 7.05E-21  |
| Unigene24465  | Potri.008G192200.2 | 4.0216  | 13.2364  | -1.7187 | Down | 1.74E-26  | 9.55E-26  |
| Unigene86457  | Potri.008G107300.1 | 29.148  | 95.9389  | -1.7187 | Down | 4.68E-66  | 6.19E-65  |
| Unigene1775   | Potri.006G079300.1 | 6.274   | 20.6497  | -1.7187 | Down | 1.74E-26  | 9.55E-26  |
| Unigene73535  | Potri.014G086500.1 | 38.3602 | 126.2692 | -1.7188 | Down | 6.88E-61  | 8.31E-60  |
| Unigene73875  | Potri.019G032800.6 | 15.7604 | 51.8823  | -1.7189 | Down | 3.20E-26  | 1.74E-25  |
| Unigene105808 | Potri.018G031600.1 | 1.1438  | 3.7652   | -1.7189 | Down | 2.48E-06  | 5.53E-06  |
| Unigene101138 | Potri.018G020200.5 | 1.5259  | 5.0232   | -1.7189 | Down | 2.48E-06  | 5.53E-06  |
| Unigene13061  | Potri.017G078900.1 | 4.4026  | 14.493   | -1.7189 | Down | 1.26E-60  | 1.51E-59  |
| Unigene2276   | Potri.014G170500.2 | 12.5421 | 41.2856  | -1.7189 | Down | 2.10E-85  | 3.71E-84  |
| Unigene74559  | Potri.012G095300.1 | 6.2166  | 20.4647  | -1.7189 | Down | 2.31E-11  | 7.10E-11  |
| Unigene51654  | Potri.012G092400.1 | 8.6445  | 28.4573  | -1.7189 | Down | 2.45E-16  | 9.47E-16  |
| Unigene86117  | Potri.008G213000.1 | 20.2769 | 66.7506  | -1.7189 | Down | 6.70E-46  | 6.00E-45  |
| Unigene8025   | Potri.003G220100.1 | 12.3066 | 40.5126  | -1.7189 | Down | 6.70E-46  | 6.00E-45  |
| Unigene25135  | Potri.003G151400.2 | 1.4724  | 4.8469   | -1.7189 | Down | 2.48E-06  | 5.53E-06  |
| Unigene2697   | Potri.017G140000.1 | 3.1373  | 10.328   | -1.719  | Down | 2.31E-11  | 7.10E-11  |
| Unigene119333 | Potri.013G146800.1 | 1.9376  | 6.3786   | -1.719  | Down | 2.31E-11  | 7.10E-11  |
| Unigene18172  | Potri.009G164400.2 | 3.2382  | 10.6601  | -1.719  | Down | 2.45E-16  | 9.47E-16  |
| Unigene28652  | Potri.001G455400.1 | 3.756   | 12.3647  | -1.719  | Down | 2.76E-21  | 1.28E-20  |
| Unigene12551  | Potri.001G416100.1 | 3.9034  | 12.8499  | -1.719  | Down | 2.45E-16  | 9.47E-16  |
| Unigene46448  | Potri.004G215200.1 | 25.1345 | 82.7534  | -1.7191 | Down | 6.50E-70  | 9.12E-69  |
| Unigene43465  | Potri.002G106300.2 | 17.7866 | 58.5588  | -1.7191 | Down | 2.02E-94  | 4.02E-93  |
| Unigene87040  | Potri.016G016000.1 | 15.0401 | 49.5185  | -1.7192 | Down | 8.29E-36  | 5.88E-35  |
| Unigene34872  | Potri.010G140100.1 | 7.8103  | 25.7154  | -1.7192 | Down | 4.20E-60  | 5.00E-59  |
| Unigene2081   | Potri.001G345300.1 | 1.7423  | 5.737    | -1.7193 | Down | 5.06E-21  | 2.33E-20  |
| Unigene21987  | Potri.016G105000.2 | 3.5771  | 11.779   | -1.7194 | Down | 1.52E-35  | 1.07E-34  |

|               |                    |         |          |         |      |           |           |
|---------------|--------------------|---------|----------|---------|------|-----------|-----------|
| Unigene45584  | Potri.001G353700.7 | 7.2061  | 23.7303  | -1.7194 | Down | 4.09E-45  | 3.60E-44  |
| Unigene32191  | Potri.010G032900.3 | 3.7089  | 12.2143  | -1.7195 | Down | 3.36E-40  | 2.64E-39  |
| Unigene49039  | Potri.009G080800.3 | 28.8699 | 95.0782  | -1.7195 | Down | 2.74E-107 | 6.40E-106 |
| Unigene28701  | Potri.014G157000.1 | 6.9618  | 22.9281  | -1.7196 | Down | 2.78E-35  | 1.94E-34  |
| Unigene29302  | Potri.014G031500.1 | 9.5291  | 31.3855  | -1.7197 | Down | 2.32E-30  | 1.42E-29  |
| Unigene29250  | Potri.012G018200.8 | 2.4585  | 8.0976   | -1.7197 | Down | 4.27E-11  | 1.29E-10  |
| Unigene75257  | Potri.010G184300.1 | 5.934   | 19.5446  | -1.7197 | Down | 4.27E-11  | 1.29E-10  |
| Unigene12277  | Potri.001G387100.3 | 1.4903  | 4.9085   | -1.7197 | Down | 4.27E-11  | 1.29E-10  |
| Unigene31989  | Potri.002G245000.1 | 8.0559  | 26.5374  | -1.7199 | Down | 1.74E-148 | 6.17E-147 |
| Unigene7386   | Potri.014G080800.1 | 3.9745  | 13.0931  | -1.72   | Down | 8.30E-16  | 3.13E-15  |
| Unigene43222  | Potri.014G052600.1 | 9.9818  | 32.8853  | -1.7201 | Down | 1.69E-166 | 6.97E-165 |
| Unigene22788  | Potri.005G070700.2 | 9.0618  | 29.8555  | -1.7201 | Down | 4.57E-44  | 3.93E-43  |
| Unigene1598   | Potri.004G143900.2 | 21.3287 | 70.2686  | -1.7201 | Down | 2.85E-58  | 3.29E-57  |
| Unigene74988  | Potri.014G001000.3 | 46.8811 | 154.4734 | -1.7203 | Down | 1.40E-76  | 2.18E-75  |
| Unigene274    | Potri.003G203000.1 | 10.0786 | 33.2117  | -1.7204 | Down | 7.07E-95  | 1.41E-93  |
| Unigene104659 | Potri.019G014300.1 | 1.8816  | 6.2007   | -1.7205 | Down | 4.64E-06  | 1.01E-05  |
| Unigene99143  | Potri.017G084100.1 | 1.2147  | 4.0031   | -1.7205 | Down | 7.88E-11  | 2.36E-10  |
| Unigene22562  | Potri.015G018000.1 | 6.6864  | 22.0348  | -1.7205 | Down | 1.43E-29  | 8.55E-29  |
| Unigene103527 | Potri.014G084500.1 | 2.0587  | 6.7845   | -1.7205 | Down | 4.64E-06  | 1.01E-05  |
| Unigene35689  | Potri.012G142800.1 | 4.4342  | 14.6128  | -1.7205 | Down | 7.88E-11  | 2.36E-10  |
| Unigene30064  | Potri.012G041700.1 | 1.4885  | 4.9052   | -1.7205 | Down | 4.64E-06  | 1.01E-05  |
| Unigene68359  | Potri.012G041300.2 | 1.2531  | 4.1297   | -1.7205 | Down | 4.64E-06  | 1.01E-05  |
| Unigene50922  | Potri.011G106600.5 | 5.351   | 17.634   | -1.7205 | Down | 7.88E-11  | 2.36E-10  |
| Unigene14830  | Potri.008G146800.3 | 5.3435  | 17.6092  | -1.7205 | Down | 1.53E-15  | 5.70E-15  |
| Unigene14115  | Potri.008G143000.1 | 1.4444  | 4.76     | -1.7205 | Down | 4.64E-06  | 1.01E-05  |
| Unigene15195  | Potri.008G069700.1 | 6.7817  | 22.349   | -1.7205 | Down | 3.13E-20  | 1.40E-19  |
| Unigene6472   | Potri.006G220000.1 | 10.5431 | 34.7445  | -1.7205 | Down | 3.11E-34  | 2.12E-33  |
| Unigene7155   | Potri.005G258900.1 | 1.0429  | 3.4369   | -1.7205 | Down | 4.64E-06  | 1.01E-05  |
| Unigene50619  | Potri.008G176100.1 | 7.9928  | 26.3436  | -1.7207 | Down | 1.26E-38  | 9.54E-38  |
| Unigene7939   | Potri.004G166600.1 | 8.5463  | 28.1687  | -1.7207 | Down | 2.99E-66  | 3.96E-65  |
| Unigene703    | Potri.T010800.1    | 9.5962  | 31.6312  | -1.7208 | Down | 1.14E-47  | 1.06E-46  |
| Unigene41686  | Potri.013G146800.1 | 2.9229  | 9.635    | -1.7209 | Down | 5.74E-20  | 2.55E-19  |
| Unigene87370  | Potri.008G064400.1 | 35.6418 | 117.4939 | -1.7209 | Down | 4.96E-84  | 8.59E-83  |
| Unigene119499 | Potri.002G263000.1 | 2.6643  | 8.7825   | -1.7209 | Down | 5.74E-20  | 2.55E-19  |
| Unigene43730  | Potri.001G257100.1 | 7.4599  | 24.5933  | -1.721  | Down | 4.78E-29  | 2.83E-28  |
| Unigene21658  | Potri.019G131800.1 | 3.8829  | 12.8035  | -1.7213 | Down | 5.51E-83  | 9.39E-82  |
| Unigene47940  | Potri.012G133600.3 | 14.0673 | 46.3852  | -1.7213 | Down | 5.76E-74  | 8.61E-73  |
| Unigene942    | Potri.005G114300.1 | 22.2223 | 73.2829  | -1.7215 | Down | 1.10E-194 | 5.52E-193 |
| Unigene49806  | Potri.016G014900.1 | 2.202   | 7.2624   | -1.7216 | Down | 5.17E-15  | 1.89E-14  |

|               |                     |         |          |         |      |           |           |
|---------------|---------------------|---------|----------|---------|------|-----------|-----------|
| Unigene71614  | Potri.004G223700.1  | 20.8439 | 68.7482  | -1.7217 | Down | 6.40E-33  | 4.21E-32  |
| Unigene16331  | Potri.002G243600.2  | 8.567   | 28.2574  | -1.7218 | Down | 1.94E-19  | 8.44E-19  |
| Unigene5019   | Potri.015G050300.1  | 16.6658 | 54.9768  | -1.7219 | Down | 2.98E-59  | 3.50E-58  |
| Unigene33492  | Potri.017G033200.4  | 4.1223  | 13.5993  | -1.722  | Down | 1.91E-41  | 1.55E-40  |
| Unigene8432   | Potri.002G005600.2  | 14.1979 | 46.8395  | -1.722  | Down | 3.20E-50  | 3.14E-49  |
| Unigene11095  | Potri.009G167500.1  | 6.7239  | 22.1838  | -1.7221 | Down | 2.79E-120 | 7.53E-119 |
| Unigene420    | Potri.006G010000.1  | 8.764   | 28.9135  | -1.7221 | Down | 3.62E-116 | 9.36E-115 |
| Unigene38599  | Potri.019G048600.1  | 1.5381  | 5.0749   | -1.7222 | Down | 8.70E-06  | 1.84E-05  |
| Unigene33472  | Potri.016G074300.1  | 1.4727  | 4.8589   | -1.7222 | Down | 3.56E-19  | 1.54E-18  |
| Unigene23816  | Potri.014G018000.1  | 10.3032 | 33.9947  | -1.7222 | Down | 9.95E-59  | 1.16E-57  |
| Unigene46005  | Potri.012G046300.1  | 25.4447 | 83.9528  | -1.7222 | Down | 5.85E-50  | 5.71E-49  |
| Unigene5067   | Potri.009G139600.1  | 2.3312  | 7.6917   | -1.7222 | Down | 8.70E-06  | 1.84E-05  |
| Unigene8563   | Potri.006G116100.1  | 1.2538  | 4.1367   | -1.7222 | Down | 8.70E-06  | 1.84E-05  |
| Unigene106955 | Potri.005G178100.2  | 1.2752  | 4.2074   | -1.7222 | Down | 8.70E-06  | 1.84E-05  |
| Unigene53539  | Potri.004G082800.1  | 5.7109  | 18.8428  | -1.7222 | Down | 2.69E-10  | 7.82E-10  |
| Unigene43061  | Potri.002G100800.4  | 3.0217  | 9.97     | -1.7222 | Down | 8.63E-37  | 6.27E-36  |
| Unigene107120 | Potri.018G133300.1  | 1.0013  | 3.3038   | -1.7223 | Down | 8.70E-06  | 1.84E-05  |
| Unigene99946  | Potri.013G008700.1  | 1.2229  | 4.035    | -1.7223 | Down | 8.70E-06  | 1.84E-05  |
| Unigene29698  | Potri.009G116300.1  | 1.1888  | 3.9225   | -1.7223 | Down | 8.70E-06  | 1.84E-05  |
| Unigene36798  | Potri.003G089700.1  | 17.1668 | 56.6466  | -1.7224 | Down | 4.40E-54  | 4.67E-53  |
| Unigene2919   | Potri.002G146200.4  | 15.9103 | 52.5019  | -1.7224 | Down | 1.73E-84  | 3.03E-83  |
| Unigene80555  | Potri.007G014300.1  | 21.2712 | 70.2031  | -1.7226 | Down | 1.17E-40  | 9.32E-40  |
| Unigene41896  | Potri.002G029700.2  | 2.6959  | 8.8974   | -1.7226 | Down | 2.51E-23  | 1.25E-22  |
| Unigene38572  | Potri.019G019700.1  | 23.2116 | 76.6121  | -1.7227 | Down | 1.42E-96  | 2.90E-95  |
| Unigene28833  | Potri.014G086500.1  | 3.3713  | 11.1282  | -1.7228 | Down | 1.75E-14  | 6.24E-14  |
| Unigene47713  | Potri.012G002100.10 | 3.5777  | 11.8095  | -1.7228 | Down | 1.75E-14  | 6.24E-14  |
| Unigene20680  | Potri.005G164700.3  | 4.4158  | 14.576   | -1.7228 | Down | 1.75E-14  | 6.24E-14  |
| Unigene43195  | Potri.016G069100.1  | 7.0628  | 23.3137  | -1.7229 | Down | 3.23E-173 | 1.39E-171 |
| Unigene50981  | Potri.001G207200.1  | 24.3094 | 80.2543  | -1.7231 | Down | 2.26E-125 | 6.40E-124 |
| Unigene18558  | Potri.001G166800.3  | 2.1735  | 7.1759   | -1.7231 | Down | 4.98E-10  | 1.42E-09  |
| Unigene11715  | Potri.010G055200.2  | 7.4088  | 24.4621  | -1.7232 | Down | 2.12E-65  | 2.78E-64  |
| Unigene69018  | Potri.006G269900.1  | 6.7031  | 22.131   | -1.7232 | Down | 1.20E-18  | 5.07E-18  |
| Unigene32354  | Potri.005G204900.3  | 2.025   | 6.6858   | -1.7232 | Down | 4.98E-10  | 1.42E-09  |
| Unigene42617  | Potri.T173700.2     | 11.4798 | 37.9058  | -1.7233 | Down | 3.91E-82  | 6.59E-81  |
| Unigene30088  | Potri.001G319000.3  | 23.1421 | 76.4106  | -1.7233 | Down | 5.25E-95  | 1.05E-93  |
| Unigene76410  | Potri.019G089700.5  | 38.1248 | 125.8899 | -1.7234 | Down | 3.88E-65  | 5.04E-64  |
| Unigene33122  | Potri.015G131300.1  | 2.7452  | 9.0658   | -1.7235 | Down | 3.23E-14  | 1.14E-13  |
| Unigene3074   | Potri.015G117000.1  | 2.2487  | 7.4261   | -1.7235 | Down | 3.23E-14  | 1.14E-13  |
| Unigene22092  | Potri.005G233800.3  | 3.9809  | 13.1464  | -1.7235 | Down | 6.06E-27  | 3.37E-26  |

|               |                    |         |          |         |      |           |           |
|---------------|--------------------|---------|----------|---------|------|-----------|-----------|
| Unigene36095  | Potri.001G347100.1 | 35.3088 | 116.6048 | -1.7235 | Down | 3.19E-94  | 6.32E-93  |
| Unigene81332  | Potri.010G080600.1 | 8.9578  | 29.5852  | -1.7237 | Down | 2.20E-18  | 9.23E-18  |
| Unigene46406  | Potri.010G049100.9 | 4.2135  | 13.916   | -1.7237 | Down | 2.20E-18  | 9.23E-18  |
| Unigene93854  | Potri.001G402500.1 | 105.899 | 349.7759 | -1.7237 | Down | 0         | 0         |
| Unigene82081  | Potri.010G211300.2 | 49.9728 | 165.0852 | -1.724  | Down | 4.96E-97  | 1.02E-95  |
| Unigene47516  | Potri.010G204400.1 | 2.1274  | 7.0286   | -1.7241 | Down | 1.63E-05  | 3.38E-05  |
| Unigene31077  | Potri.009G153300.1 | 1.4495  | 4.7889   | -1.7241 | Down | 1.63E-05  | 3.38E-05  |
| Unigene44679  | Potri.004G012600.1 | 1.7762  | 5.8683   | -1.7241 | Down | 9.22E-10  | 2.59E-09  |
| Unigene29791  | Potri.014G117600.1 | 1.2862  | 4.2495   | -1.7242 | Down | 1.63E-05  | 3.38E-05  |
| Unigene17008  | Potri.013G144600.1 | 2.3459  | 7.7506   | -1.7242 | Down | 9.22E-10  | 2.59E-09  |
| Unigene41506  | Potri.013G050400.1 | 5.623   | 18.5781  | -1.7242 | Down | 4.05E-18  | 1.68E-17  |
| Unigene26858  | Potri.008G213000.1 | 6.879   | 22.7277  | -1.7242 | Down | 2.04E-26  | 1.11E-25  |
| Unigene42291  | Potri.007G063600.1 | 14.1506 | 46.7524  | -1.7242 | Down | 2.52E-55  | 2.74E-54  |
| Unigene11543  | Potri.007G025700.1 | 2.3215  | 7.6702   | -1.7242 | Down | 9.22E-10  | 2.59E-09  |
| Unigene47264  | Potri.006G088600.1 | 1.9982  | 6.6019   | -1.7242 | Down | 1.63E-05  | 3.38E-05  |
| Unigene20049  | Potri.005G027200.2 | 15.6034 | 51.5523  | -1.7242 | Down | 1.48E-30  | 9.11E-30  |
| Unigene52300  | Potri.004G153800.1 | 3.5244  | 11.6442  | -1.7242 | Down | 1.08E-34  | 7.45E-34  |
| Unigene41805  | Potri.001G042400.1 | 1.4346  | 4.7398   | -1.7242 | Down | 1.63E-05  | 3.38E-05  |
| Unigene32643  | Potri.013G134900.2 | 16.1491 | 53.3639  | -1.7244 | Down | 2.11E-75  | 3.23E-74  |
| Unigene84734  | Potri.008G189900.3 | 71.2806 | 235.5339 | -1.7244 | Down | 3.37E-149 | 1.20E-147 |
| Unigene30315  | Potri.018G026900.1 | 18.862  | 62.3361  | -1.7246 | Down | 3.13E-87  | 5.66E-86  |
| Unigene61936  | Potri.016G110700.1 | 6.7984  | 22.4681  | -1.7246 | Down | 5.21E-22  | 2.48E-21  |
| Unigene8211   | Potri.004G202800.6 | 14.4414 | 47.7259  | -1.7246 | Down | 1.49E-46  | 1.35E-45  |
| Unigene58413  | Potri.017G112800.1 | 4.3751  | 14.4603  | -1.7247 | Down | 7.43E-18  | 3.05E-17  |
| Unigene30238  | Potri.014G052600.1 | 20.9588 | 69.2716  | -1.7247 | Down | 3.63E-34  | 2.46E-33  |
| Unigene54353  | Potri.013G093400.2 | 8.7328  | 28.8632  | -1.7247 | Down | 7.43E-18  | 3.05E-17  |
| Unigene57102  | Potri.017G141000.3 | 3.2054  | 10.5957  | -1.7249 | Down | 1.09E-13  | 3.76E-13  |
| Unigene72652  | Potri.013G142100.1 | 7.8903  | 26.0817  | -1.7249 | Down | 1.09E-13  | 3.76E-13  |
| Unigene39829  | Potri.005G072200.4 | 3.3155  | 10.9596  | -1.7249 | Down | 1.09E-13  | 3.76E-13  |
| Unigene51448  | Potri.008G031700.2 | 11.995  | 39.6541  | -1.725  | Down | 9.56E-22  | 4.51E-21  |
| Unigene34613  | Potri.006G132000.8 | 6.6747  | 22.0666  | -1.7251 | Down | 9.08E-30  | 5.47E-29  |
| Unigene51334  | Potri.001G163300.2 | 16.9661 | 56.0918  | -1.7251 | Down | 8.98E-38  | 6.68E-37  |
| Unigene13566  | Potri.013G068300.3 | 20.2573 | 66.9753  | -1.7252 | Down | 2.01E-197 | 1.03E-195 |
| Unigene118194 | Potri.010G152300.2 | 2.6128  | 8.6388   | -1.7252 | Down | 1.71E-09  | 4.73E-09  |
| Unigene34077  | Potri.016G034900.1 | 2.7524  | 9.1005   | -1.7253 | Down | 1.71E-09  | 4.73E-09  |
| Unigene19589  | Potri.016G018900.1 | 2.3312  | 7.7079   | -1.7253 | Down | 1.71E-09  | 4.73E-09  |
| Unigene25482  | Potri.009G026100.3 | 2.7524  | 9.1005   | -1.7253 | Down | 1.71E-09  | 4.73E-09  |
| Unigene2213   | Potri.006G164400.1 | 6.5031  | 21.5019  | -1.7253 | Down | 1.25E-25  | 6.68E-25  |
| Unigene16027  | Potri.002G189900.1 | 83.8877 | 277.3874 | -1.7254 | Down | 1.10E-160 | 4.31E-159 |

|               |                    |          |          |         |      |           |           |
|---------------|--------------------|----------|----------|---------|------|-----------|-----------|
| Unigene5269   | Potri.008G043600.3 | 6.3646   | 21.0494  | -1.7256 | Down | 2.02E-13  | 6.85E-13  |
| Unigene12083  | Potri.015G135500.1 | 7.6575   | 25.3264  | -1.7257 | Down | 5.72E-53  | 5.94E-52  |
| Unigene101457 | Potri.015G000100.1 | 1.9381   | 6.4106   | -1.7258 | Down | 2.51E-17  | 1.01E-16  |
| Unigene46615  | Potri.001G334200.2 | 3.8726   | 12.8095  | -1.7258 | Down | 2.51E-17  | 1.01E-16  |
| Unigene22060  | Potri.001G166600.1 | 6.0172   | 19.903   | -1.7258 | Down | 7.61E-49  | 7.25E-48  |
| Unigene19684  | Potri.010G184300.2 | 9.1636   | 30.3127  | -1.7259 | Down | 3.22E-21  | 1.49E-20  |
| Unigene89375  | Potri.004G059000.1 | 103.364  | 341.9148 | -1.7259 | Down | 1.58E-271 | 1.21E-269 |
| Unigene88343  | Potri.T005700.1    | 116.5188 | 385.4623 | -1.726  | Down | 3.87E-286 | 3.22E-284 |
| Unigene21783  | Potri.001G333500.1 | 14.8126  | 49.0004  | -1.726  | Down | 2.92E-146 | 1.01E-144 |
| Unigene43153  | Potri.019G025700.1 | 2.3732   | 7.8511   | -1.7261 | Down | 5.58E-29  | 3.29E-28  |
| Unigene12511  | Potri.018G105300.3 | 12.0843  | 39.9802  | -1.7262 | Down | 1.01E-36  | 7.30E-36  |
| Unigene39307  | Potri.010G119600.1 | 6.3517   | 21.0147  | -1.7262 | Down | 1.36E-40  | 1.08E-39  |
| Unigene104370 | Potri.T134200.5    | 2.6643   | 8.8161   | -1.7264 | Down | 3.16E-09  | 8.62E-09  |
| Unigene28305  | Potri.016G091700.4 | 3.0627   | 10.1347  | -1.7264 | Down | 3.16E-09  | 8.62E-09  |
| Unigene20226  | Potri.016G055600.4 | 1.4425   | 4.7734   | -1.7264 | Down | 3.07E-05  | 6.19E-05  |
| Unigene102500 | Potri.015G030600.4 | 1.3187   | 4.3635   | -1.7264 | Down | 3.07E-05  | 6.19E-05  |
| Unigene85537  | Potri.013G032500.2 | 1.8007   | 5.9585   | -1.7264 | Down | 3.07E-05  | 6.19E-05  |
| Unigene40894  | Potri.012G114100.1 | 1.6217   | 5.3663   | -1.7264 | Down | 3.07E-05  | 6.19E-05  |
| Unigene22954  | Potri.011G015900.2 | 1.9128   | 6.3295   | -1.7264 | Down | 3.16E-09  | 8.62E-09  |
| Unigene35652  | Potri.009G115500.1 | 11.0434  | 36.543   | -1.7264 | Down | 1.02E-28  | 5.98E-28  |
| Unigene44689  | Potri.004G229600.1 | 1.7028   | 5.6347   | -1.7264 | Down | 3.72E-13  | 1.25E-12  |
| Unigene7854   | Potri.003G056500.6 | 10.5012  | 34.7488  | -1.7264 | Down | 1.21E-86  | 2.18E-85  |
| Unigene56287  | Potri.003G053200.2 | 1.8452   | 6.1059   | -1.7264 | Down | 3.07E-05  | 6.19E-05  |
| Unigene53325  | Potri.002G032100.1 | 6.3682   | 21.0727  | -1.7264 | Down | 4.61E-17  | 1.84E-16  |
| Unigene25702  | Potri.002G012500.3 | 1.5092   | 4.9941   | -1.7264 | Down | 3.07E-05  | 6.19E-05  |
| Unigene7707   | Potri.006G256300.1 | 4.5374   | 15.0183  | -1.7268 | Down | 2.73E-74  | 4.10E-73  |
| Unigene43896  | Potri.004G052300.3 | 32.3222  | 106.984  | -1.7268 | Down | 1.02E-146 | 3.56E-145 |
| Unigene5107   | Potri.002G189900.1 | 43.4844  | 143.9286 | -1.7268 | Down | 1.01E-127 | 2.93E-126 |
| Unigene4172   | Potri.015G088300.2 | 34.1538  | 113.0512 | -1.7269 | Down | 1.35E-85  | 2.39E-84  |
| Unigene21487  | Potri.013G015500.1 | 13.463   | 44.5646  | -1.7269 | Down | 6.65E-116 | 1.71E-114 |
| Unigene40097  | Potri.003G135600.1 | 12.7188  | 42.1022  | -1.7269 | Down | 5.36E-55  | 5.79E-54  |
| Unigene74616  | Potri.010G067500.1 | 9.4976   | 31.4412  | -1.727  | Down | 8.48E-17  | 3.34E-16  |
| Unigene33850  | Potri.001G098600.2 | 14.5451  | 48.1488  | -1.727  | Down | 1.70E-119 | 4.57E-118 |
| Unigene11810  | Potri.001G008800.1 | 23.417   | 77.5202  | -1.727  | Down | 4.79E-248 | 3.28E-246 |
| Unigene29768  | Potri.019G092500.1 | 6.2933   | 20.8368  | -1.7272 | Down | 6.85E-13  | 2.27E-12  |
| Unigene44421  | Potri.006G067400.1 | 22.2095  | 73.5339  | -1.7272 | Down | 5.88E-81  | 9.77E-80  |
| Unigene17634  | Potri.005G107400.1 | 25.7649  | 85.3007  | -1.7272 | Down | 4.04E-115 | 1.03E-113 |
| Unigene38297  | Potri.004G169800.2 | 3.1338   | 10.3757  | -1.7272 | Down | 6.85E-13  | 2.27E-12  |
| Unigene118549 | Potri.002G200900.1 | 3.3759   | 11.1773  | -1.7272 | Down | 6.85E-13  | 2.27E-12  |



|               |                    |         |          |         |      |           |           |
|---------------|--------------------|---------|----------|---------|------|-----------|-----------|
| Unigene27332  | Potri.010G049100.9 | 8.9226  | 29.5479  | -1.7275 | Down | 2.06E-35  | 1.44E-34  |
| Unigene11807  | Potri.013G029000.6 | 8.8212  | 29.2149  | -1.7277 | Down | 3.25E-91  | 6.18E-90  |
| Unigene100505 | Potri.008G021600.1 | 1.5399  | 5.1      | -1.7277 | Down | 5.86E-09  | 1.57E-08  |
| Unigene41392  | Potri.007G007700.2 | 6.6256  | 21.9432  | -1.7277 | Down | 1.56E-16  | 6.07E-16  |
| Unigene93392  | Potri.001G233200.1 | 1.7637  | 5.8413   | -1.7277 | Down | 5.86E-09  | 1.57E-08  |
| Unigene54194  | Potri.001G052100.3 | 4.9367  | 16.3499  | -1.7277 | Down | 5.86E-09  | 1.57E-08  |
| Unigene84925  | Potri.005G160300.1 | 19.5065 | 64.6087  | -1.7278 | Down | 1.27E-42  | 1.06E-41  |
| Unigene24232  | Potri.002G096900.1 | 6.7949  | 22.5068  | -1.7278 | Down | 1.15E-27  | 6.52E-27  |
| Unigene13376  | Potri.001G366000.1 | 9.6046  | 31.8133  | -1.7278 | Down | 4.24E-87  | 7.65E-86  |
| Unigene53248  | Potri.019G051500.1 | 36.4828 | 120.8489 | -1.7279 | Down | 8.57E-76  | 1.32E-74  |
| Unigene50101  | Potri.015G041700.1 | 6.3682  | 21.094   | -1.7279 | Down | 3.17E-46  | 2.86E-45  |
| Unigene28690  | Potri.005G073500.2 | 9.296   | 30.7921  | -1.7279 | Down | 3.17E-46  | 2.86E-45  |
| Unigene13142  | Potri.002G258600.1 | 17.2683 | 57.2019  | -1.7279 | Down | 2.53E-105 | 5.73E-104 |
| Unigene38943  | Potri.015G034000.1 | 3.9575  | 13.1108  | -1.7281 | Down | 1.26E-12  | 4.13E-12  |
| Unigene5441   | Potri.010G161600.3 | 7.6906  | 25.4782  | -1.7281 | Down | 8.71E-24  | 4.39E-23  |
| Unigene36713  | Potri.003G071300.1 | 6.844   | 22.6733  | -1.7281 | Down | 1.26E-12  | 4.13E-12  |
| Unigene102085 | Potri.002G123500.1 | 3.1148  | 10.319   | -1.7281 | Down | 1.26E-12  | 4.13E-12  |
| Unigene20000  | Potri.012G129800.2 | 14.9608 | 49.5691  | -1.7283 | Down | 4.25E-42  | 3.50E-41  |
| Unigene2817   | Potri.010G149900.1 | 2.761   | 9.1483   | -1.7283 | Down | 2.87E-16  | 1.10E-15  |
| Unigene8814   | Potri.016G091900.1 | 14.4385 | 47.8451  | -1.7285 | Down | 3.13E-38  | 2.35E-37  |
| Unigene36427  | Potri.011G083100.1 | 7.9425  | 26.3208  | -1.7285 | Down | 1.60E-23  | 7.98E-23  |
| Unigene42520  | Potri.004G068700.1 | 7.9949  | 26.4929  | -1.7285 | Down | 3.21E-151 | 1.16E-149 |
| Unigene33689  | Potri.009G032100.1 | 10.1883 | 33.7667  | -1.7287 | Down | 2.31E-34  | 1.58E-33  |
| Unigene72133  | Potri.015G078000.1 | 28.4273 | 94.2207  | -1.7288 | Down | 3.54E-45  | 3.12E-44  |
| Unigene48615  | Potri.019G034500.3 | 1.2727  | 4.2189   | -1.729  | Down | 5.78E-05  | 1.13E-04  |
| Unigene53418  | Potri.019G004600.1 | 2.2659  | 7.5113   | -1.729  | Down | 5.78E-05  | 1.13E-04  |
| Unigene21081  | Potri.017G151600.2 | 1.8437  | 6.1118   | -1.729  | Down | 5.78E-05  | 1.13E-04  |
| Unigene60480  | Potri.017G078900.1 | 4.2165  | 13.9775  | -1.729  | Down | 1.09E-08  | 2.87E-08  |
| Unigene48249  | Potri.016G117200.1 | 1.3035  | 4.321    | -1.729  | Down | 5.78E-05  | 1.13E-04  |
| Unigene28706  | Potri.015G101200.1 | 3.161   | 10.4785  | -1.729  | Down | 1.23E-19  | 5.41E-19  |
| Unigene49986  | Potri.015G045900.1 | 3.6665  | 12.1543  | -1.729  | Down | 5.27E-16  | 2.01E-15  |
| Unigene16763  | Potri.013G002900.1 | 0.964   | 3.1956   | -1.729  | Down | 5.78E-05  | 1.13E-04  |
| Unigene38740  | Potri.012G019900.1 | 1.1973  | 3.9689   | -1.729  | Down | 5.78E-05  | 1.13E-04  |
| Unigene39010  | Potri.005G233800.4 | 1.1827  | 3.9205   | -1.729  | Down | 5.78E-05  | 1.13E-04  |
| Unigene118509 | Potri.002G143000.1 | 3.2398  | 10.7399  | -1.729  | Down | 2.33E-12  | 7.52E-12  |
| Unigene36401  | Potri.001G240400.3 | 5.9863  | 19.8445  | -1.729  | Down | 2.33E-12  | 7.52E-12  |
| Unigene3242   | Potri.001G173300.1 | 5.479   | 18.1628  | -1.729  | Down | 1.65E-66  | 2.19E-65  |
| Unigene1117   | Potri.004G088600.2 | 10.7684 | 35.6983  | -1.7291 | Down | 3.57E-181 | 1.64E-179 |
| Unigene21719  | Potri.003G093600.1 | 5.2817  | 17.5121  | -1.7293 | Down | 1.91E-37  | 1.41E-36  |

|               |                    |          |          |         |      |           |           |
|---------------|--------------------|----------|----------|---------|------|-----------|-----------|
| Unigene34962  | Potri.011G092900.1 | 2.6767   | 8.8759   | -1.7294 | Down | 5.37E-23  | 2.64E-22  |
| Unigene316    | Potri.005G164000.1 | 7.7766   | 25.7868  | -1.7294 | Down | 3.21E-94  | 6.36E-93  |
| Unigene12061  | Potri.003G098200.2 | 6.687    | 22.1744  | -1.7295 | Down | 2.16E-44  | 1.87E-43  |
| Unigene17739  | Potri.016G084700.4 | 16.5554  | 54.9055  | -1.7296 | Down | 9.89E-48  | 9.22E-47  |
| Unigene50723  | Potri.006G279900.1 | 10.6969  | 35.4752  | -1.7296 | Down | 1.83E-65  | 2.40E-64  |
| Unigene68166  | Potri.016G126000.1 | 6.5596   | 21.7554  | -1.7297 | Down | 9.70E-16  | 3.65E-15  |
| Unigene11082  | Potri.010G077400.1 | 3.8081   | 12.6296  | -1.7297 | Down | 5.46E-76  | 8.44E-75  |
| Unigene8822   | Potri.006G227300.1 | 6.7938   | 22.5324  | -1.7297 | Down | 9.70E-16  | 3.65E-15  |
| Unigene17572  | Potri.001G333500.3 | 9.4406   | 31.3106  | -1.7297 | Down | 5.78E-30  | 3.50E-29  |
| Unigene34384  | Potri.004G116100.1 | 7.737    | 25.6617  | -1.7298 | Down | 3.35E-65  | 4.36E-64  |
| Unigene11370  | Potri.004G062300.1 | 9.2042   | 30.5291  | -1.7298 | Down | 3.00E-86  | 5.36E-85  |
| Unigene11865  | Potri.T010700.2    | 8.0648   | 26.752   | -1.7299 | Down | 7.23E-44  | 6.19E-43  |
| Unigene49596  | Potri.001G109500.1 | 18.3389  | 60.8359  | -1.73   | Down | 8.28E-51  | 8.22E-50  |
| Unigene107187 | Potri.011G086700.1 | 1.823    | 6.048    | -1.7301 | Down | 4.15E-19  | 1.79E-18  |
| Unigene43673  | Potri.003G157700.1 | 8.7518   | 29.0351  | -1.7301 | Down | 1.17E-36  | 8.48E-36  |
| Unigene34024  | Potri.001G320400.2 | 23.5149  | 78.0117  | -1.7301 | Down | 3.93E-82  | 6.62E-81  |
| Unigene3839   | Potri.018G082900.6 | 50.082   | 166.1591 | -1.7302 | Down | 3.49E-134 | 1.08E-132 |
| Unigene2207   | Potri.010G001300.4 | 10.3344  | 34.2865  | -1.7302 | Down | 1.32E-43  | 1.13E-42  |
| Unigene23670  | Potri.005G127800.1 | 8.2059   | 27.2255  | -1.7302 | Down | 1.51E-50  | 1.49E-49  |
| Unigene39966  | Potri.004G175800.5 | 204.1552 | 677.3972 | -1.7303 | Down | 0         | 0         |
| Unigene41774  | Potri.004G133300.2 | 12.3422  | 40.9501  | -1.7303 | Down | 2.04E-64  | 2.62E-63  |
| Unigene10664  | Potri.012G060200.3 | 4.6792   | 15.5268  | -1.7304 | Down | 2.77E-50  | 2.72E-49  |
| Unigene21254  | Potri.008G029800.2 | 3.8959   | 12.9273  | -1.7304 | Down | 1.84E-95  | 3.71E-94  |
| Unigene4874   | Potri.017G044700.1 | 11.2286  | 37.2652  | -1.7307 | Down | 7.97E-26  | 4.28E-25  |
| Unigene4088   | Potri.008G076100.1 | 6.5698   | 21.805   | -1.7307 | Down | 7.62E-19  | 3.25E-18  |
| Unigene19946  | Potri.006G216600.2 | 9.9252   | 32.9415  | -1.7307 | Down | 7.62E-19  | 3.25E-18  |
| Unigene18768  | Potri.010G026800.4 | 9.3722   | 31.1078  | -1.7308 | Down | 3.55E-29  | 2.10E-28  |
| Unigene14064  | Potri.017G148100.1 | 6.8321   | 22.6788  | -1.7309 | Down | 7.93E-12  | 2.49E-11  |
| Unigene73333  | Potri.016G081700.2 | 6.5407   | 21.7114  | -1.7309 | Down | 7.93E-12  | 2.49E-11  |
| Unigene29993  | Potri.001G087800.1 | 4.2595   | 14.1392  | -1.7309 | Down | 7.93E-12  | 2.49E-11  |
| Unigene11972  | Potri.001G029800.7 | 1.7581   | 5.8358   | -1.7309 | Down | 7.93E-12  | 2.49E-11  |
| Unigene571    | Potri.018G026700.7 | 3.3362   | 11.0744  | -1.731  | Down | 1.59E-32  | 1.04E-31  |
| Unigene42706  | Potri.014G169900.1 | 12.4332  | 41.2725  | -1.731  | Down | 3.14E-87  | 5.68E-86  |
| Unigene85224  | Potri.015G077600.1 | 11.2159  | 37.2345  | -1.7311 | Down | 1.46E-25  | 7.77E-25  |
| Unigene34886  | Potri.008G032800.3 | 7.6769   | 25.4866  | -1.7311 | Down | 7.12E-155 | 2.66E-153 |
| Unigene13892  | Potri.012G035200.1 | 5.6882   | 18.887   | -1.7313 | Down | 1.42E-52  | 1.46E-51  |
| Unigene41216  | Potri.005G024600.3 | 13.8146  | 45.868   | -1.7313 | Down | 2.91E-32  | 1.88E-31  |
| Unigene45365  | Potri.003G086400.2 | 6.3513   | 21.0879  | -1.7313 | Down | 2.91E-32  | 1.88E-31  |
| Unigene13408  | Potri.004G088700.1 | 8.9315   | 29.66    | -1.7315 | Down | 4.38E-123 | 1.22E-121 |

|               |                    |         |          |         |      |           |           |
|---------------|--------------------|---------|----------|---------|------|-----------|-----------|
| Unigene10782  | Potri.018G044400.1 | 15.2867 | 50.771   | -1.7317 | Down | 5.77E-203 | 3.05E-201 |
| Unigene72462  | Potri.001G094700.1 | 21.8031 | 72.411   | -1.7317 | Down | 2.40E-35  | 1.68E-34  |
| Unigene8459   | Potri.013G077900.1 | 33.9144 | 112.6537 | -1.7319 | Down | 5.30E-152 | 1.93E-150 |
| Unigene28286  | Potri.019G048200.5 | 2.9065  | 9.6549   | -1.732  | Down | 3.75E-08  | 9.57E-08  |
| Unigene10590  | Potri.018G121200.1 | 7.4422  | 24.722   | -1.732  | Down | 4.91E-25  | 2.57E-24  |
| Unigene106682 | Potri.018G079500.2 | 1.0361  | 3.4418   | -1.732  | Down | 1.09E-04  | 2.08E-04  |
| Unigene45914  | Potri.018G005800.1 | 1.1418  | 3.793    | -1.732  | Down | 1.09E-04  | 2.08E-04  |
| Unigene16345  | Potri.015G143800.1 | 0.9423  | 3.1302   | -1.732  | Down | 1.09E-04  | 2.08E-04  |
| Unigene48024  | Potri.015G130700.1 | 3.2671  | 10.8529  | -1.732  | Down | 3.75E-08  | 9.57E-08  |
| Unigene17908  | Potri.014G149600.1 | 4.9549  | 16.4596  | -1.732  | Down | 1.12E-21  | 5.25E-21  |
| Unigene8437   | Potri.013G013000.1 | 1.6014  | 5.3197   | -1.732  | Down | 3.75E-08  | 9.57E-08  |
| Unigene32356  | Potri.010G088000.1 | 3.0217  | 10.0378  | -1.732  | Down | 2.18E-28  | 1.26E-27  |
| Unigene25094  | Potri.008G119700.1 | 25.0988 | 83.3749  | -1.732  | Down | 8.43E-62  | 1.03E-60  |
| Unigene39105  | Potri.008G101300.1 | 1.4255  | 4.7352   | -1.732  | Down | 1.09E-04  | 2.08E-04  |
| Unigene116660 | Potri.008G012200.2 | 1.3688  | 4.5469   | -1.732  | Down | 1.09E-04  | 2.08E-04  |
| Unigene101079 | Potri.007G126900.2 | 1.2364  | 4.1073   | -1.732  | Down | 1.09E-04  | 2.08E-04  |
| Unigene63057  | Potri.006G201000.2 | 3.7093  | 12.322   | -1.732  | Down | 1.46E-11  | 4.55E-11  |
| Unigene75725  | Potri.004G223700.1 | 40.3238 | 133.9507 | -1.732  | Down | 1.80E-68  | 2.47E-67  |
| Unigene48415  | Potri.001G156700.1 | 3.7932  | 12.6004  | -1.732  | Down | 1.46E-11  | 4.55E-11  |
| Unigene19426  | Potri.013G009400.1 | 0.9097  | 3.0221   | -1.7321 | Down | 1.09E-04  | 2.08E-04  |
| Unigene2172   | Potri.012G060400.1 | 15.9749 | 53.0733  | -1.7322 | Down | 1.54E-61  | 1.88E-60  |
| Unigene25885  | Potri.009G106900.3 | 18.0246 | 59.8849  | -1.7322 | Down | 6.08E-98  | 1.27E-96  |
| Unigene45389  | Potri.005G211700.1 | 4.2827  | 14.2285  | -1.7322 | Down | 3.34E-58  | 3.84E-57  |
| Unigene50530  | Potri.007G033000.1 | 11.005  | 36.5649  | -1.7323 | Down | 3.64E-38  | 2.73E-37  |
| Unigene40561  | Potri.004G004900.1 | 10.2437 | 34.0353  | -1.7323 | Down | 3.64E-38  | 2.73E-37  |
| Unigene39606  | Potri.002G085300.1 | 12.0945 | 40.1852  | -1.7323 | Down | 2.78E-71  | 3.99E-70  |
| Unigene12532  | Potri.002G217000.1 | 13.409  | 44.5598  | -1.7325 | Down | 3.02E-41  | 2.44E-40  |
| Unigene109610 | Potri.010G100400.1 | 16.2322 | 53.9524  | -1.7328 | Down | 7.31E-28  | 4.18E-27  |
| Unigene30880  | Potri.013G065000.1 | 3.784   | 12.5797  | -1.7331 | Down | 2.70E-11  | 8.28E-11  |
| Unigene27176  | Potri.010G048300.1 | 4.0231  | 13.3744  | -1.7331 | Down | 3.75E-21  | 1.74E-20  |
| Unigene105135 | Potri.007G023900.1 | 1.6673  | 5.5428   | -1.7331 | Down | 2.70E-11  | 8.28E-11  |
| Unigene27712  | Potri.005G076200.3 | 8.0091  | 26.6258  | -1.7331 | Down | 3.75E-21  | 1.74E-20  |
| Unigene83714  | Potri.003G185000.1 | 55.9493 | 186.0043 | -1.7331 | Down | 2.58E-115 | 6.62E-114 |
| Unigene93817  | Potri.002G187500.2 | 6.0253  | 20.0308  | -1.7331 | Down | 5.99E-31  | 3.73E-30  |
| Unigene23129  | Potri.006G256400.1 | 4.7584  | 15.8205  | -1.7332 | Down | 1.34E-27  | 7.59E-27  |
| Unigene33904  | Potri.013G126700.1 | 5.422   | 18.0279  | -1.7333 | Down | 8.67E-18  | 3.55E-17  |
| Unigene26915  | Potri.009G112100.1 | 10.6048 | 35.2605  | -1.7333 | Down | 8.67E-18  | 3.55E-17  |
| Unigene10583  | Potri.005G234700.2 | 7.9244  | 26.3485  | -1.7333 | Down | 8.67E-18  | 3.55E-17  |
| Unigene25797  | Potri.014G123200.1 | 16.3363 | 54.3263  | -1.7336 | Down | 5.88E-50  | 5.74E-49  |

|               |                    |         |          |         |      |           |           |
|---------------|--------------------|---------|----------|---------|------|-----------|-----------|
| Unigene43904  | Potri.006G038400.1 | 9.6588  | 32.1214  | -1.7336 | Down | 2.10E-88  | 3.84E-87  |
| Unigene44320  | Potri.012G137700.1 | 8.1124  | 26.9801  | -1.7337 | Down | 2.45E-27  | 1.38E-26  |
| Unigene52559  | Potri.010G129200.1 | 19.5716 | 65.0909  | -1.7337 | Down | 3.38E-40  | 2.66E-39  |
| Unigene68343  | Potri.005G182800.1 | 2.6978  | 8.9722   | -1.7337 | Down | 6.96E-08  | 1.75E-07  |
| Unigene12261  | Potri.005G101700.1 | 1.3949  | 4.6393   | -1.7337 | Down | 6.96E-08  | 1.75E-07  |
| Unigene32801  | Potri.003G070400.1 | 2.6499  | 8.8128   | -1.7337 | Down | 2.45E-27  | 1.38E-26  |
| Unigene38161  | Potri.007G011400.1 | 6.4348  | 21.4026  | -1.7338 | Down | 1.08E-49  | 1.04E-48  |
| Unigene39900  | Potri.018G107500.2 | 23.4454 | 77.9858  | -1.7339 | Down | 1.77E-81  | 2.96E-80  |
| Unigene5027   | Potri.007G081000.3 | 30.5856 | 101.7489 | -1.7341 | Down | 6.37E-59  | 7.43E-58  |
| Unigene56763  | Potri.005G010300.1 | 9.9349  | 33.0495  | -1.7341 | Down | 1.59E-17  | 6.46E-17  |
| Unigene45037  | Potri.015G003100.3 | 10.2547 | 34.1166  | -1.7342 | Down | 5.90E-81  | 9.79E-80  |
| Unigene76383  | Potri.016G012000.1 | 11.2229 | 37.3402  | -1.7343 | Down | 1.26E-20  | 5.75E-20  |
| Unigene3144   | Potri.010G250600.1 | 3.2106  | 10.6821  | -1.7343 | Down | 1.26E-20  | 5.75E-20  |
| Unigene44488  | Potri.002G185000.1 | 2.6041  | 8.6642   | -1.7343 | Down | 1.26E-20  | 5.75E-20  |
| Unigene18175  | Potri.004G158900.1 | 9.9429  | 33.0833  | -1.7344 | Down | 3.01E-52  | 3.08E-51  |
| Unigene16261  | Potri.005G165400.4 | 40.6084 | 135.139  | -1.7346 | Down | 9.99E-115 | 2.54E-113 |
| Unigene47123  | Potri.006G165600.4 | 25.4474 | 84.6894  | -1.7347 | Down | 1.72E-42  | 1.43E-41  |
| Unigene32966  | Potri.019G062100.1 | 4.4791  | 14.9079  | -1.7348 | Down | 1.20E-48  | 1.14E-47  |
| Unigene111369 | Potri.017G106900.2 | 19.7752 | 65.8206  | -1.7348 | Down | 4.56E-36  | 3.25E-35  |
| Unigene37546  | Potri.017G129400.1 | 16.9428 | 56.3955  | -1.7349 | Down | 3.78E-39  | 2.91E-38  |
| Unigene91317  | Potri.001G438400.1 | 6.9937  | 23.2804  | -1.735  | Down | 1.86E-23  | 9.27E-23  |
| Unigene118892 | Potri.011G082100.3 | 6.4334  | 21.4165  | -1.7351 | Down | 1.51E-26  | 8.28E-26  |
| Unigene33648  | Potri.010G211000.4 | 12.2602 | 40.8142  | -1.7351 | Down | 1.54E-54  | 1.65E-53  |
| Unigene27513  | Potri.007G086900.3 | 21.4755 | 71.4984  | -1.7352 | Down | 6.92E-39  | 5.28E-38  |
| Unigene32500  | Potri.017G058500.1 | 8.6511  | 28.8041  | -1.7353 | Down | 2.37E-57  | 2.68E-56  |
| Unigene45053  | Potri.005G120700.1 | 4.0604  | 13.5192  | -1.7353 | Down | 2.82E-54  | 3.00E-53  |
| Unigene44010  | Potri.009G005900.1 | 22.4098 | 74.6181  | -1.7354 | Down | 5.24E-85  | 9.21E-84  |
| Unigene3196   | Potri.003G113500.1 | 39.7724 | 132.4336 | -1.7354 | Down | 1.44E-109 | 3.45E-108 |
| Unigene52875  | Potri.T004100.1    | 1.5483  | 5.1558   | -1.7355 | Down | 2.06E-04  | 3.81E-04  |
| Unigene14441  | Potri.019G025500.1 | 1.1623  | 3.8705   | -1.7355 | Down | 2.06E-04  | 3.81E-04  |
| Unigene9315   | Potri.015G144700.3 | 8.5967  | 28.6272  | -1.7355 | Down | 1.53E-35  | 1.07E-34  |
| Unigene29182  | Potri.015G095000.4 | 4.5387  | 15.1139  | -1.7355 | Down | 5.38E-17  | 2.14E-16  |
| Unigene107207 | Potri.014G093100.1 | 1.0232  | 3.4072   | -1.7355 | Down | 1.29E-07  | 3.18E-07  |
| Unigene4108   | Potri.010G073000.1 | 1.4866  | 4.9504   | -1.7355 | Down | 2.06E-04  | 3.81E-04  |
| Unigene51601  | Potri.008G209800.1 | 1.3815  | 4.6003   | -1.7355 | Down | 2.06E-04  | 3.81E-04  |
| Unigene49708  | Potri.008G125800.4 | 9.2985  | 30.9642  | -1.7355 | Down | 2.76E-26  | 1.50E-25  |
| Unigene3755   | Potri.008G113700.2 | 1.3631  | 4.5392   | -1.7355 | Down | 2.06E-04  | 3.81E-04  |
| Unigene37419  | Potri.007G115800.1 | 1.6747  | 5.5767   | -1.7355 | Down | 2.06E-04  | 3.81E-04  |
| Unigene31347  | Potri.006G255700.3 | 11.5344 | 38.41    | -1.7355 | Down | 3.41E-23  | 1.69E-22  |

|              |                    |         |          |         |      |           |           |
|--------------|--------------------|---------|----------|---------|------|-----------|-----------|
| Unigene66805 | Potri.006G121400.1 | 2.7884  | 9.2855   | -1.7355 | Down | 3.41E-23  | 1.69E-22  |
| Unigene33051 | Potri.002G231700.1 | 7.7966  | 25.9629  | -1.7355 | Down | 2.76E-26  | 1.50E-25  |
| Unigene78093 | Potri.002G160900.4 | 8.7297  | 29.0701  | -1.7355 | Down | 5.38E-17  | 2.14E-16  |
| Unigene27656 | Potri.001G054800.1 | 1.7096  | 5.6929   | -1.7355 | Down | 1.29E-07  | 3.18E-07  |
| Unigene35794 | Potri.013G034600.1 | 1.3861  | 4.6159   | -1.7356 | Down | 2.06E-04  | 3.81E-04  |
| Unigene90368 | Potri.009G011400.2 | 2.1594  | 7.191    | -1.7356 | Down | 1.29E-07  | 3.18E-07  |
| Unigene79709 | Potri.006G149000.1 | 1.6815  | 5.5996   | -1.7356 | Down | 2.06E-04  | 3.81E-04  |
| Unigene45881 | Potri.006G051000.1 | 1.5872  | 5.2855   | -1.7356 | Down | 1.29E-07  | 3.18E-07  |
| Unigene15722 | Potri.005G026900.2 | 1.4148  | 4.7114   | -1.7356 | Down | 2.06E-04  | 3.81E-04  |
| Unigene45380 | Potri.001G395100.1 | 1.8565  | 6.1823   | -1.7356 | Down | 9.22E-11  | 2.75E-10  |
| Unigene87085 | Potri.018G130300.1 | 17.0307 | 56.7245  | -1.7358 | Down | 1.92E-41  | 1.56E-40  |
| Unigene43024 | Potri.012G120000.1 | 7.3415  | 24.4513  | -1.7358 | Down | 9.40E-54  | 9.91E-53  |
| Unigene17145 | Potri.006G128700.2 | 15.7462 | 52.4573  | -1.7361 | Down | 3.52E-41  | 2.84E-40  |
| Unigene20204 | Potri.002G213300.2 | 37.2044 | 123.9386 | -1.7361 | Down | 4.53E-111 | 1.11E-109 |
| Unigene49005 | Potri.018G006500.2 | 6.4055  | 21.3401  | -1.7362 | Down | 4.23E-38  | 3.17E-37  |
| Unigene34213 | Potri.015G108500.1 | 34.3805 | 114.5375 | -1.7362 | Down | 3.36E-268 | 2.55E-266 |
| Unigene23171 | Potri.010G134700.1 | 3.4081  | 11.3552  | -1.7363 | Down | 9.90E-17  | 3.88E-16  |
| Unigene45635 | Potri.017G048500.3 | 2.5367  | 8.4521   | -1.7364 | Down | 6.20E-32  | 3.97E-31  |
| Unigene33596 | Potri.014G075100.2 | 14.7596 | 49.1837  | -1.7365 | Down | 7.74E-38  | 5.77E-37  |
| Unigene92177 | Potri.013G041300.1 | 38.3537 | 127.8064 | -1.7365 | Down | 4.72E-134 | 1.46E-132 |
| Unigene1473  | Potri.010G220000.1 | 4.8165  | 16.0499  | -1.7365 | Down | 1.28E-13  | 4.38E-13  |
| Unigene81363 | Potri.001G262100.1 | 67.9909 | 226.556  | -1.7365 | Down | 3.03E-131 | 9.10E-130 |
| Unigene31415 | Potri.014G051500.3 | 12.9451 | 43.14    | -1.7366 | Down | 9.36E-35  | 6.44E-34  |
| Unigene1501  | Potri.010G132200.3 | 10.4971 | 34.983   | -1.7367 | Down | 9.79E-44  | 8.35E-43  |
| Unigene73634 | Potri.006G052400.1 | 69.6727 | 232.2022 | -1.7367 | Down | 1.43E-112 | 3.54E-111 |
| Unigene43228 | Potri.005G249900.1 | 4.8992  | 16.3274  | -1.7367 | Down | 1.15E-22  | 5.57E-22  |
| Unigene37802 | Potri.001G407800.1 | 60.6887 | 202.2523 | -1.7367 | Down | 1.15E-139 | 3.74E-138 |
| Unigene75995 | Potri.008G117100.1 | 33.8027 | 112.6621 | -1.7368 | Down | 1.35E-58  | 1.57E-57  |
| Unigene25600 | Potri.008G195000.1 | 2.929   | 9.7628   | -1.7369 | Down | 1.43E-19  | 6.29E-19  |
| Unigene41661 | Potri.007G020800.1 | 4.3882  | 14.6262  | -1.7369 | Down | 1.70E-10  | 5.00E-10  |
| Unigene45791 | Potri.005G210500.5 | 3.8256  | 12.7511  | -1.7369 | Down | 1.70E-10  | 5.00E-10  |
| Unigene64706 | Potri.003G166000.1 | 8.8087  | 29.3604  | -1.7369 | Down | 1.43E-19  | 6.29E-19  |
| Unigene31991 | Potri.007G070600.1 | 7.1276  | 23.7589  | -1.737  | Down | 2.99E-76  | 4.64E-75  |
| Unigene30087 | Potri.004G155600.1 | 7.6581  | 25.5283  | -1.737  | Down | 1.70E-25  | 9.03E-25  |
| Unigene8935  | Potri.014G177800.2 | 24.8887 | 82.9723  | -1.7371 | Down | 1.19E-105 | 2.72E-104 |
| Unigene4866  | Potri.002G016900.1 | 36.4962 | 121.6684 | -1.7371 | Down | 8.01E-91  | 1.52E-89  |
| Unigene3705  | Potri.010G036900.1 | 52.2649 | 174.245  | -1.7372 | Down | 2.74E-194 | 1.38E-192 |
| Unigene51970 | Potri.015G056400.1 | 7.1873  | 23.9643  | -1.7374 | Down | 3.13E-34  | 2.13E-33  |
| Unigene70042 | Potri.017G150900.1 | 3.1145  | 10.3858  | -1.7375 | Down | 2.36E-13  | 7.98E-13  |

|               |                     |          |          |         |      |           |           |
|---------------|---------------------|----------|----------|---------|------|-----------|-----------|
| Unigene23409  | Potri.009G071800.1  | 1.4614   | 4.8732   | -1.7375 | Down | 2.41E-07  | 5.81E-07  |
| Unigene45675  | Potri.004G211800.1  | 4.1172   | 13.7295  | -1.7375 | Down | 7.63E-49  | 7.27E-48  |
| Unigene22180  | Potri.001G220100.1  | 19.9493  | 66.5213  | -1.7375 | Down | 2.39E-81  | 3.99E-80  |
| Unigene23855  | Potri.012G131800.1  | 2.2682   | 7.5638   | -1.7376 | Down | 2.63E-19  | 1.14E-18  |
| Unigene14331  | Potri.011G143000.3  | 1.5697   | 5.2345   | -1.7376 | Down | 2.41E-07  | 5.81E-07  |
| Unigene47225  | Potri.010G245000.1  | 6.9012   | 23.0136  | -1.7376 | Down | 2.36E-13  | 7.98E-13  |
| Unigene33566  | Potri.007G047400.2  | 6.3994   | 21.3402  | -1.7376 | Down | 3.80E-31  | 2.39E-30  |
| Unigene92320  | Potri.005G254200.1  | 1.6737   | 5.5813   | -1.7376 | Down | 2.41E-07  | 5.81E-07  |
| Unigene38804  | Potri.005G175400.1  | 2.967    | 9.8941   | -1.7376 | Down | 2.41E-07  | 5.81E-07  |
| Unigene91897  | Potri.005G098500.2  | 108.4543 | 361.6669 | -1.7376 | Down | 0         | 0         |
| Unigene41519  | Potri.001G137400.1  | 22.1288  | 73.7958  | -1.7376 | Down | 1.75E-110 | 4.26E-109 |
| Unigene97636  | Potri.006G253100.1  | 62.3003  | 207.7684 | -1.7377 | Down | 7.62E-175 | 3.33E-173 |
| Unigene6723   | Potri.013G081300.2  | 7.1279   | 23.7745  | -1.7379 | Down | 3.57E-63  | 4.49E-62  |
| Unigene28139  | Potri.011G117000.1  | 26.2931  | 87.6993  | -1.7379 | Down | 3.33E-98  | 6.96E-97  |
| Unigene26901  | Potri.009G008700.2  | 10.029   | 33.4507  | -1.7379 | Down | 1.09E-42  | 9.13E-42  |
| Unigene19727  | Potri.004G166600.1  | 14.2148  | 47.4136  | -1.7379 | Down | 8.67E-37  | 6.30E-36  |
| Unigene4328   | Potri.013G151600.2  | 14.3672  | 47.9246  | -1.738  | Down | 6.97E-31  | 4.33E-30  |
| Unigene39412  | Potri.005G105600.1  | 9.0006   | 30.0225  | -1.738  | Down | 5.50E-66  | 7.27E-65  |
| Unigene215    | Potri.002G102900.1  | 2.7337   | 9.1188   | -1.738  | Down | 6.97E-31  | 4.33E-30  |
| Unigene52829  | Potri.006G039500.1  | 4.7359   | 15.7996  | -1.7382 | Down | 2.00E-42  | 1.66E-41  |
| Unigene49340  | Potri.015G134900.4  | 7.1486   | 23.8503  | -1.7383 | Down | 1.59E-36  | 1.14E-35  |
| Unigene119408 | Potri.013G161500.6  | 1.5315   | 5.1096   | -1.7383 | Down | 3.15E-10  | 9.11E-10  |
| Unigene38801  | Potri.011G067300.4  | 3.0429   | 10.1521  | -1.7383 | Down | 3.15E-10  | 9.11E-10  |
| Unigene15363  | Potri.009G007900.2  | 4.043    | 13.4887  | -1.7383 | Down | 3.15E-10  | 9.11E-10  |
| Unigene38753  | Potri.004G001200.1  | 21.8222  | 72.8098  | -1.7383 | Down | 1.83E-65  | 2.40E-64  |
| Unigene28271  | Potri.003G012400.1  | 16.4286  | 54.8144  | -1.7383 | Down | 9.18E-57  | 1.03E-55  |
| Unigene53431  | Potri.001G157800.1  | 3.9872   | 13.3027  | -1.7383 | Down | 3.15E-10  | 9.11E-10  |
| Unigene12923  | Potri.016G053400.1  | 8.0745   | 26.9416  | -1.7384 | Down | 2.40E-39  | 1.86E-38  |
| Unigene47750  | Potri.011G154600.8  | 9.8257   | 32.7854  | -1.7384 | Down | 1.28E-30  | 7.88E-30  |
| Unigene2615   | Potri.008G139700.13 | 15.4367  | 51.5108  | -1.7385 | Down | 9.21E-126 | 2.62E-124 |
| Unigene30815  | Potri.018G110300.3  | 4.72     | 15.7516  | -1.7386 | Down | 4.34E-13  | 1.45E-12  |
| Unigene27477  | Potri.001G399700.1  | 6.6491   | 22.1892  | -1.7386 | Down | 4.34E-13  | 1.45E-12  |
| Unigene43858  | Potri.005G127800.2  | 18.8948  | 63.0644  | -1.7388 | Down | 3.48E-99  | 7.41E-98  |
| Unigene21643  | Potri.001G430000.1  | 3.8198   | 12.7495  | -1.7389 | Down | 6.15E-16  | 2.33E-15  |
| Unigene40778  | Potri.017G119300.1  | 8.5859   | 28.6604  | -1.739  | Down | 8.88E-19  | 3.78E-18  |
| Unigene46053  | Potri.001G204900.1  | 10.437   | 34.8395  | -1.739  | Down | 8.88E-19  | 3.78E-18  |
| Unigene48199  | Potri.015G083800.1  | 9.8084   | 32.7435  | -1.7391 | Down | 1.30E-21  | 6.10E-21  |
| Unigene27970  | Potri.010G106700.2  | 7.0426   | 23.5116  | -1.7392 | Down | 1.92E-24  | 9.87E-24  |
| Unigene18735  | Potri.001G160500.7  | 6.0185   | 20.0926  | -1.7392 | Down | 1.92E-24  | 9.87E-24  |

|               |                    |          |          |         |      |           |           |
|---------------|--------------------|----------|----------|---------|------|-----------|-----------|
| Unigene71719  | Potri.T091100.1    | 118.2981 | 394.9575 | -1.7393 | Down | 2.15E-183 | 1.01E-181 |
| Unigene31191  | Potri.010G167100.1 | 12.3113  | 41.1045  | -1.7393 | Down | 4.27E-30  | 2.60E-29  |
| Unigene101833 | Potri.016G035900.1 | 1.1442   | 3.8213   | -1.7397 | Down | 3.92E-04  | 7.06E-04  |
| Unigene75461  | Potri.004G059200.2 | 1.6878   | 5.6368   | -1.7397 | Down | 3.92E-04  | 7.06E-04  |
| Unigene15423  | Potri.T004400.1    | 3.0877   | 10.3124  | -1.7398 | Down | 1.13E-15  | 4.24E-15  |
| Unigene57604  | Potri.015G130600.1 | 3.8191   | 12.755   | -1.7398 | Down | 5.83E-10  | 1.66E-09  |
| Unigene119232 | Potri.014G110500.2 | 1.1711   | 3.9113   | -1.7398 | Down | 4.49E-07  | 1.06E-06  |
| Unigene117299 | Potri.011G136700.3 | 1.0507   | 3.5091   | -1.7398 | Down | 3.92E-04  | 7.06E-04  |
| Unigene31706  | Potri.010G178600.1 | 9.2862   | 31.0143  | -1.7398 | Down | 1.63E-18  | 6.87E-18  |
| Unigene14881  | Potri.009G163400.2 | 2.9324   | 9.7936   | -1.7398 | Down | 1.13E-15  | 4.24E-15  |
| Unigene15258  | Potri.008G205400.1 | 2.1314   | 7.1185   | -1.7398 | Down | 4.49E-07  | 1.06E-06  |
| Unigene72307  | Potri.007G073200.4 | 9.0533   | 30.2364  | -1.7398 | Down | 1.13E-15  | 4.24E-15  |
| Unigene100823 | Potri.006G273700.1 | 1.6504   | 5.5121   | -1.7398 | Down | 3.92E-04  | 7.06E-04  |
| Unigene9898   | Potri.006G240200.1 | 2.6023   | 8.6912   | -1.7398 | Down | 5.83E-10  | 1.66E-09  |
| Unigene53553  | Potri.006G167800.4 | 5.2782   | 17.6284  | -1.7398 | Down | 5.83E-10  | 1.66E-09  |
| Unigene107051 | Potri.006G037500.1 | 1.0497   | 3.5058   | -1.7398 | Down | 5.83E-10  | 1.66E-09  |
| Unigene30446  | Potri.005G248900.2 | 6.8861   | 22.9983  | -1.7398 | Down | 1.63E-18  | 6.87E-18  |
| Unigene28530  | Potri.005G001300.1 | 2.4064   | 8.037    | -1.7398 | Down | 4.49E-07  | 1.06E-06  |
| Unigene8970   | Potri.004G211200.3 | 9.4829   | 31.6714  | -1.7398 | Down | 1.63E-18  | 6.87E-18  |
| Unigene22240  | Potri.004G088600.2 | 10.1898  | 34.0342  | -1.7399 | Down | 3.03E-153 | 1.12E-151 |
| Unigene38584  | Potri.002G215800.2 | 22.3797  | 74.7531  | -1.7399 | Down | 3.08E-80  | 5.07E-79  |
| Unigene26863  | Potri.003G005700.3 | 20.6642  | 69.0289  | -1.7401 | Down | 1.74E-46  | 1.57E-45  |
| Unigene2446   | Potri.002G089100.1 | 6.8698   | 22.9488  | -1.7401 | Down | 1.14E-43  | 9.69E-43  |
| Unigene48127  | Potri.010G226100.5 | 7.6844   | 25.6739  | -1.7403 | Down | 9.58E-27  | 5.29E-26  |
| Unigene11106  | Potri.004G147800.1 | 4.839    | 16.1676  | -1.7403 | Down | 3.94E-124 | 1.10E-122 |
| Unigene73649  | Potri.013G009400.1 | 39.9387  | 133.4452 | -1.7404 | Down | 1.17E-65  | 1.53E-64  |
| Unigene33119  | Potri.003G217000.6 | 15.2918  | 51.0942  | -1.7404 | Down | 2.08E-43  | 1.76E-42  |
| Unigene29446  | Potri.018G025600.2 | 5.4071   | 18.0685  | -1.7405 | Down | 3.00E-18  | 1.25E-17  |
| Unigene7935   | Potri.009G047100.3 | 6.2417   | 20.856   | -1.7405 | Down | 4.92E-60  | 5.85E-59  |
| Unigene29349  | Potri.018G067200.3 | 5.2273   | 17.4677  | -1.7406 | Down | 3.00E-18  | 1.25E-17  |
| Unigene53596  | Potri.008G196500.1 | 9.9578   | 33.2755  | -1.7406 | Down | 3.00E-18  | 1.25E-17  |
| Unigene7911   | Potri.002G260700.2 | 12.9623  | 43.3202  | -1.7407 | Down | 1.50E-84  | 2.62E-83  |
| Unigene23668  | Potri.002G152100.1 | 5.7115   | 19.088   | -1.7407 | Down | 2.08E-15  | 7.72E-15  |
| Unigene103114 | Potri.015G020400.1 | 1.2931   | 4.3221   | -1.7409 | Down | 1.47E-12  | 4.81E-12  |
| Unigene12166  | Potri.003G136800.1 | 4.6948   | 15.6917  | -1.7409 | Down | 1.65E-37  | 1.22E-36  |
| Unigene18065  | Potri.016G048200.1 | 2.2836   | 7.6333   | -1.741  | Down | 1.47E-12  | 4.81E-12  |
| Unigene6872   | Potri.013G085300.2 | 4.3948   | 14.6901  | -1.741  | Down | 1.47E-12  | 4.81E-12  |
| Unigene23327  | Potri.006G059100.1 | 11.8267  | 39.5318  | -1.741  | Down | 1.10E-67  | 1.48E-66  |
| Unigene36229  | Potri.003G038700.2 | 19.9272  | 66.6084  | -1.741  | Down | 1.09E-34  | 7.47E-34  |

|               |                    |         |         |         |      |           |           |
|---------------|--------------------|---------|---------|---------|------|-----------|-----------|
| Unigene82355  | Potri.002G157500.3 | 11.147  | 37.2598 | -1.741  | Down | 1.18E-23  | 5.93E-23  |
| Unigene34242  | Potri.017G111800.3 | 5.5744  | 18.6353 | -1.7411 | Down | 8.02E-21  | 3.67E-20  |
| Unigene61312  | Potri.010G134700.1 | 3.9202  | 13.1052 | -1.7411 | Down | 8.02E-21  | 3.67E-20  |
| Unigene13368  | Potri.005G027200.2 | 13.9804 | 46.7339 | -1.7411 | Down | 4.77E-73  | 7.02E-72  |
| Unigene42680  | Potri.011G106600.5 | 10.9733 | 36.6852 | -1.7412 | Down | 3.34E-130 | 9.94E-129 |
| Unigene76448  | Potri.015G117600.1 | 9.5725  | 32.0059 | -1.7414 | Down | 5.50E-18  | 2.27E-17  |
| Unigene23033  | Potri.014G194800.1 | 2.6002  | 8.6939  | -1.7414 | Down | 5.50E-18  | 2.27E-17  |
| Unigene105843 | Potri.014G042700.3 | 1.5519  | 5.1889  | -1.7414 | Down | 1.08E-09  | 3.02E-09  |
| Unigene10183  | Potri.011G066100.1 | 2.4091  | 8.0549  | -1.7414 | Down | 1.08E-09  | 3.02E-09  |
| Unigene51489  | Potri.007G077200.1 | 9.789   | 32.73   | -1.7414 | Down | 5.50E-18  | 2.27E-17  |
| Unigene14786  | Potri.002G183000.1 | 5.3682  | 17.9487 | -1.7414 | Down | 5.50E-18  | 2.27E-17  |
| Unigene16543  | Potri.013G046000.1 | 8.6912  | 29.066  | -1.7417 | Down | 3.83E-15  | 1.40E-14  |
| Unigene63192  | Potri.012G051800.1 | 6.8597  | 22.941  | -1.7417 | Down | 3.83E-15  | 1.40E-14  |
| Unigene10665  | Potri.001G060800.1 | 11.3082 | 37.8241 | -1.7419 | Down | 1.49E-74  | 2.25E-73  |
| Unigene11598  | Potri.015G098800.1 | 1.6025  | 5.3611  | -1.7422 | Down | 3.97E-23  | 1.96E-22  |
| Unigene52019  | Potri.010G049100.6 | 6.9937  | 23.3973 | -1.7422 | Down | 1.01E-17  | 4.13E-17  |
| Unigene54242  | Potri.010G033900.2 | 3.4402  | 11.5094 | -1.7422 | Down | 2.72E-12  | 8.76E-12  |
| Unigene94813  | Potri.009G112700.1 | 2.4693  | 8.2611  | -1.7422 | Down | 8.37E-07  | 1.94E-06  |
| Unigene26062  | Potri.001G353100.4 | 16.2544 | 54.3791 | -1.7422 | Down | 1.61E-28  | 9.37E-28  |
| Unigene19623  | Potri.001G098700.3 | 2.0783  | 6.9529  | -1.7422 | Down | 8.37E-07  | 1.94E-06  |
| Unigene117080 | Potri.006G043900.1 | 2.0601  | 6.8922  | -1.7423 | Down | 8.37E-07  | 1.94E-06  |
| Unigene113823 | Potri.018G145800.4 | 12.1941 | 40.8034 | -1.7425 | Down | 1.08E-25  | 5.77E-25  |
| Unigene45377  | Potri.001G253200.1 | 5.3642  | 17.9499 | -1.7425 | Down | 2.09E-68  | 2.86E-67  |
| Unigene34700  | Potri.005G243400.1 | 3.6853  | 12.3323 | -1.7426 | Down | 5.11E-39  | 3.92E-38  |
| Unigene25746  | Potri.004G142000.1 | 21.8459 | 73.1053 | -1.7426 | Down | 1.39E-89  | 2.59E-88  |
| Unigene6783   | Potri.004G056600.2 | 13.2386 | 44.3068 | -1.7428 | Down | 4.69E-76  | 7.24E-75  |
| Unigene33708  | Potri.002G105700.5 | 22.7163 | 76.0397 | -1.743  | Down | 1.96E-70  | 2.78E-69  |
| Unigene43884  | Potri.001G368400.1 | 1.4899  | 4.9873  | -1.743  | Down | 1.86E-17  | 7.51E-17  |
| Unigene27634  | Potri.013G075300.2 | 14.6581 | 49.0683 | -1.7431 | Down | 2.23E-33  | 1.49E-32  |
| Unigene67817  | Potri.009G068100.2 | 2.0201  | 6.7623  | -1.7431 | Down | 2.00E-09  | 5.52E-09  |
| Unigene30778  | Potri.009G032700.1 | 14.8932 | 49.8554 | -1.7431 | Down | 4.51E-65  | 5.87E-64  |
| Unigene30701  | Potri.008G168300.1 | 2.2508  | 7.5347  | -1.7431 | Down | 2.00E-09  | 5.52E-09  |
| Unigene28141  | Potri.003G043500.2 | 2.7703  | 9.2735  | -1.7431 | Down | 2.00E-09  | 5.52E-09  |
| Unigene1404   | Potri.007G101400.1 | 5.0201  | 16.8068 | -1.7433 | Down | 2.42E-54  | 2.58E-53  |
| Unigene92201  | Potri.001G067400.1 | 5.2592  | 17.6083 | -1.7433 | Down | 4.96E-20  | 2.21E-19  |
| Unigene40055  | Potri.006G228900.2 | 9.2537  | 30.9825 | -1.7434 | Down | 1.71E-38  | 1.29E-37  |
| Unigene33961  | Potri.001G036100.2 | 2.0118  | 6.7366  | -1.7435 | Down | 5.02E-12  | 1.59E-11  |
| Unigene26312  | Potri.001G345200.2 | 5.5203  | 18.4852 | -1.7436 | Down | 5.02E-12  | 1.59E-11  |
| Unigene10551  | Potri.006G182000.2 | 11.4291 | 38.2762 | -1.7437 | Down | 3.13E-38  | 2.35E-37  |



|               |                    |         |          |         |      |           |           |
|---------------|--------------------|---------|----------|---------|------|-----------|-----------|
| Unigene2795   | Potri.014G190600.3 | 14.5571 | 48.7534  | -1.7438 | Down | 2.66E-90  | 4.99E-89  |
| Unigene25675  | Potri.009G033900.4 | 6.308   | 21.1268  | -1.7438 | Down | 1.30E-14  | 4.64E-14  |
| Unigene40000  | Potri.009G009800.1 | 2.1528  | 7.2101   | -1.7438 | Down | 1.30E-14  | 4.64E-14  |
| Unigene39917  | Potri.006G031900.1 | 3.6662  | 12.2788  | -1.7438 | Down | 1.30E-14  | 4.64E-14  |
| Unigene33179  | Potri.002G020600.1 | 2.8313  | 9.4826   | -1.7438 | Down | 1.30E-14  | 4.64E-14  |
| Unigene46883  | Potri.013G095200.1 | 15.314  | 51.2933  | -1.7439 | Down | 2.71E-30  | 1.66E-29  |
| Unigene7626   | Potri.006G167800.1 | 2.792   | 9.353    | -1.7441 | Down | 9.10E-20  | 4.01E-19  |
| Unigene32069  | Potri.006G118400.1 | 24.1164 | 80.787   | -1.7441 | Down | 9.91E-196 | 5.02E-194 |
| Unigene28033  | Potri.008G114900.1 | 3.1051  | 10.4033  | -1.7443 | Down | 6.64E-25  | 3.47E-24  |
| Unigene68276  | Potri.003G005900.3 | 10.6756 | 35.7669  | -1.7443 | Down | 3.44E-48  | 3.24E-47  |
| Unigene43172  | Potri.005G096800.1 | 11.2269 | 37.6155  | -1.7444 | Down | 4.61E-79  | 7.46E-78  |
| Unigene28194  | Potri.004G198900.1 | 13.7419 | 46.0422  | -1.7444 | Down | 2.69E-53  | 2.81E-52  |
| Unigene34321  | Potri.003G144700.1 | 9.1489  | 30.6534  | -1.7444 | Down | 4.61E-79  | 7.46E-78  |
| Unigene18141  | Potri.007G035200.1 | 7.8792  | 26.4007  | -1.7445 | Down | 1.37E-32  | 8.92E-32  |
| Unigene20163  | Potri.016G067200.2 | 5.5579  | 18.6289  | -1.7449 | Down | 2.39E-14  | 8.44E-14  |
| Unigene17214  | Potri.016G002400.1 | 3.6194  | 12.1314  | -1.7449 | Down | 9.26E-12  | 2.90E-11  |
| Unigene7326   | Potri.013G119400.1 | 2.524   | 8.46     | -1.7449 | Down | 3.70E-09  | 1.01E-08  |
| Unigene70090  | Potri.013G106400.1 | 1.9146  | 6.4174   | -1.7449 | Down | 3.70E-09  | 1.01E-08  |
| Unigene98098  | Potri.010G113600.1 | 1.7171  | 5.7554   | -1.7449 | Down | 1.56E-06  | 3.54E-06  |
| Unigene6327   | Potri.009G124500.1 | 11.4442 | 38.3586  | -1.7449 | Down | 1.22E-24  | 6.30E-24  |
| Unigene54490  | Potri.009G116100.3 | 7.2038  | 24.1456  | -1.7449 | Down | 2.39E-14  | 8.44E-14  |
| Unigene1328   | Potri.008G180000.1 | 11.8084 | 39.5794  | -1.7449 | Down | 1.91E-37  | 1.41E-36  |
| Unigene52563  | Potri.008G014800.2 | 6.6606  | 22.3251  | -1.7449 | Down | 2.39E-14  | 8.44E-14  |
| Unigene54077  | Potri.007G126500.1 | 6.4557  | 21.6382  | -1.7449 | Down | 2.39E-14  | 8.44E-14  |
| Unigene51268  | Potri.006G103700.1 | 4.6463  | 15.5735  | -1.7449 | Down | 9.26E-12  | 2.90E-11  |
| Unigene107405 | Potri.006G066000.1 | 35.2481 | 118.1445 | -1.7449 | Down | 2.52E-55  | 2.74E-54  |
| Unigene41915  | Potri.005G232800.1 | 2.0223  | 6.7782   | -1.7449 | Down | 1.56E-06  | 3.54E-06  |
| Unigene19462  | Potri.005G194200.1 | 1.5578  | 5.2213   | -1.7449 | Down | 1.56E-06  | 3.54E-06  |
| Unigene27784  | Potri.005G181700.2 | 3.6331  | 12.1773  | -1.7449 | Down | 2.39E-14  | 8.44E-14  |
| Unigene101029 | Potri.005G040300.2 | 1.1968  | 4.0114   | -1.7449 | Down | 1.56E-06  | 3.54E-06  |
| Unigene46095  | Potri.005G020600.1 | 2.3978  | 8.037    | -1.7449 | Down | 1.56E-06  | 3.54E-06  |
| Unigene119218 | Potri.002G187500.2 | 1.0691  | 3.5834   | -1.7449 | Down | 1.56E-06  | 3.54E-06  |
| Unigene51815  | Potri.001G279300.1 | 14.4697 | 48.4994  | -1.7449 | Down | 5.31E-40  | 4.16E-39  |
| Unigene119475 | Potri.002G088100.2 | 1.1751  | 3.9388   | -1.745  | Down | 3.70E-09  | 1.01E-08  |
| Unigene42747  | Potri.006G045800.1 | 8.0424  | 26.9591  | -1.7451 | Down | 1.69E-103 | 3.76E-102 |
| Unigene22572  | Potri.019G042800.1 | 10.049  | 33.6893  | -1.7452 | Down | 5.87E-50  | 5.72E-49  |
| Unigene42741  | Potri.013G019000.1 | 6.9844  | 23.4147  | -1.7452 | Down | 4.60E-55  | 4.98E-54  |
| Unigene22852  | Potri.006G017400.1 | 7.4267  | 24.8993  | -1.7453 | Down | 9.70E-40  | 7.56E-39  |
| Unigene115048 | Potri.015G064600.1 | 16.5923 | 55.6301  | -1.7454 | Down | 3.50E-37  | 2.56E-36  |

|               |                    |         |         |         |      |           |           |
|---------------|--------------------|---------|---------|---------|------|-----------|-----------|
| Unigene51812  | Potri.010G228600.3 | 18.3497 | 61.5249 | -1.7454 | Down | 1.86E-62  | 2.31E-61  |
| Unigene31846  | Potri.001G365800.3 | 9.4288  | 31.613  | -1.7454 | Down | 2.23E-239 | 1.45E-237 |
| Unigene42458  | Potri.015G012800.1 | 2.0938  | 7.0207  | -1.7455 | Down | 3.00E-52  | 3.07E-51  |
| Unigene34054  | Potri.019G010700.1 | 7.8217  | 26.2284 | -1.7456 | Down | 3.83E-47  | 3.53E-46  |
| Unigene2119   | Potri.018G090600.3 | 7.6873  | 25.7792 | -1.7457 | Down | 4.93E-42  | 4.06E-41  |
| Unigene11788  | Potri.001G046500.3 | 5.5     | 18.4443 | -1.7457 | Down | 4.93E-42  | 4.06E-41  |
| Unigene402    | Potri.002G106200.1 | 10.8754 | 36.4729 | -1.7458 | Down | 5.85E-145 | 2.00E-143 |
| Unigene2154   | Potri.010G244700.1 | 18.3895 | 61.6796 | -1.7459 | Down | 6.21E-62  | 7.64E-61  |
| Unigene16799  | Potri.006G129300.1 | 5.7704  | 19.3556 | -1.746  | Down | 3.05E-29  | 1.81E-28  |
| Unigene16676  | Potri.019G018400.1 | 5.8614  | 19.662  | -1.7461 | Down | 4.39E-14  | 1.54E-13  |
| Unigene108363 | Potri.013G147000.1 | 7.9284  | 26.596  | -1.7461 | Down | 4.39E-14  | 1.54E-13  |
| Unigene54311  | Potri.008G205600.3 | 12.8217 | 43.0107 | -1.7461 | Down | 1.11E-26  | 6.14E-26  |
| Unigene29157  | Potri.012G137200.1 | 28.1349 | 94.3869 | -1.7462 | Down | 2.35E-126 | 6.74E-125 |
| Unigene7335   | Potri.018G124000.1 | 5.8022  | 19.4675 | -1.7464 | Down | 1.53E-31  | 9.73E-31  |
| Unigene64597  | Potri.011G089800.1 | 5.751   | 19.296  | -1.7464 | Down | 1.71E-11  | 5.28E-11  |
| Unigene29279  | Potri.009G155200.1 | 27.7031 | 92.9527 | -1.7464 | Down | 1.14E-88  | 2.10E-87  |
| Unigene74107  | Potri.009G074100.1 | 18.3012 | 61.4045 | -1.7464 | Down | 1.53E-31  | 9.73E-31  |
| Unigene80409  | Potri.006G265700.1 | 15.7921 | 52.9861 | -1.7464 | Down | 1.53E-31  | 9.72E-31  |
| Unigene43819  | Potri.013G112500.5 | 26.9827 | 90.545  | -1.7466 | Down | 2.44E-98  | 5.12E-97  |
| Unigene8149   | Potri.007G067100.1 | 5.1015  | 17.1193 | -1.7466 | Down | 5.63E-19  | 2.41E-18  |
| Unigene9461   | Potri.004G158400.1 | 20.8997 | 70.1356 | -1.7467 | Down | 3.78E-61  | 4.59E-60  |
| Unigene44025  | Potri.014G040200.1 | 1.6136  | 5.416   | -1.7469 | Down | 6.86E-09  | 1.83E-08  |
| Unigene14150  | Potri.008G178000.2 | 2.0901  | 7.0151  | -1.7469 | Down | 6.86E-09  | 1.83E-08  |
| Unigene39859  | Potri.008G134900.2 | 8.1666  | 27.4105 | -1.7469 | Down | 2.81E-31  | 1.77E-30  |
| Unigene10072  | Potri.008G134200.2 | 2.2606  | 7.5874  | -1.7469 | Down | 6.86E-09  | 1.83E-08  |
| Unigene8960   | Potri.005G162400.1 | 2.449   | 8.2197  | -1.7469 | Down | 6.86E-09  | 1.83E-08  |
| Unigene38021  | Potri.006G198300.1 | 26.0194 | 87.338  | -1.747  | Down | 6.11E-51  | 6.08E-50  |
| Unigene76210  | Potri.005G033100.2 | 20.0589 | 67.3325 | -1.7471 | Down | 3.91E-36  | 2.80E-35  |
| Unigene8410   | Potri.012G084600.3 | 4.4916  | 15.0782 | -1.7472 | Down | 2.77E-21  | 1.29E-20  |
| Unigene21291  | Potri.012G058000.1 | 23.3276 | 78.3147 | -1.7472 | Down | 0         | 0         |
| Unigene490    | Potri.010G235200.1 | 8.3814  | 28.1371 | -1.7472 | Down | 1.12E-104 | 2.54E-103 |
| Unigene88843  | Potri.018G076200.2 | 28.1383 | 94.4705 | -1.7473 | Down | 3.84E-75  | 5.85E-74  |
| Unigene62159  | Potri.011G033000.3 | 6.9432  | 23.3109 | -1.7473 | Down | 8.09E-14  | 2.80E-13  |
| Unigene49107  | Potri.010G223400.1 | 1.5975  | 5.3634  | -1.7473 | Down | 8.09E-14  | 2.80E-13  |
| Unigene44652  | Potri.010G054300.5 | 15.3586 | 51.5646 | -1.7473 | Down | 2.30E-87  | 4.18E-86  |
| Unigene26699  | Potri.008G105700.1 | 12.9345 | 43.4259 | -1.7473 | Down | 1.12E-50  | 1.11E-49  |
| Unigene3923   | Potri.004G103800.2 | 3.6871  | 12.3789 | -1.7473 | Down | 8.09E-14  | 2.80E-13  |
| Unigene39322  | Potri.008G045400.4 | 10.3398 | 34.7178 | -1.7475 | Down | 3.99E-48  | 3.75E-47  |
| Unigene47479  | Potri.004G153700.2 | 26.4849 | 88.9306 | -1.7475 | Down | 4.82E-70  | 6.78E-69  |

|               |                     |         |          |         |      |           |           |
|---------------|---------------------|---------|----------|---------|------|-----------|-----------|
| Unigene21442  | Potri.002G093900.1  | 9.065   | 30.4386  | -1.7475 | Down | 4.55E-143 | 1.52E-141 |
| Unigene30583  | Potri.002G068600.1  | 45.696  | 153.4344 | -1.7475 | Down | 2.88E-82  | 4.87E-81  |
| Unigene24338  | Potri.002G070300.1  | 7.3737  | 24.7615  | -1.7476 | Down | 2.04E-50  | 2.01E-49  |
| Unigene2227   | Potri.005G063100.1  | 9.3622  | 31.44    | -1.7477 | Down | 2.92E-55  | 3.18E-54  |
| Unigene50569  | Potri.010G014700.1  | 4.1035  | 13.7813  | -1.7478 | Down | 5.13E-43  | 4.31E-42  |
| Unigene4938   | Potri.018G139800.3  | 1.8928  | 6.3577   | -1.748  | Down | 2.92E-06  | 6.46E-06  |
| Unigene27980  | Potri.010G091200.1  | 5.3737  | 18.0493  | -1.748  | Down | 3.89E-16  | 1.49E-15  |
| Unigene115768 | Potri.009G023600.1  | 2.1278  | 7.147    | -1.748  | Down | 2.92E-06  | 6.46E-06  |
| Unigene10052  | Potri.009G006200.1  | 1.8014  | 6.0506   | -1.748  | Down | 2.92E-06  | 6.46E-06  |
| Unigene8738   | Potri.008G221200.1  | 1.1592  | 3.8936   | -1.748  | Down | 2.92E-06  | 6.46E-06  |
| Unigene41255  | Potri.004G103700.4  | 4.5618  | 15.3224  | -1.748  | Down | 3.89E-16  | 1.49E-15  |
| Unigene2473   | Potri.004G043700.1  | 1.8014  | 6.0506   | -1.748  | Down | 2.92E-06  | 6.46E-06  |
| Unigene35607  | Potri.004G034200.1  | 1.0498  | 3.5262   | -1.748  | Down | 2.92E-06  | 6.46E-06  |
| Unigene52127  | Potri.003G064100.2  | 4.5949  | 15.4334  | -1.748  | Down | 3.89E-16  | 1.49E-15  |
| Unigene4010   | Potri.001G296100.1  | 2.3398  | 7.8591   | -1.748  | Down | 2.92E-06  | 6.46E-06  |
| Unigene77055  | Potri.014G068200.3  | 42.8375 | 143.8946 | -1.7481 | Down | 1.20E-76  | 1.88E-75  |
| Unigene11065  | Potri.009G139500.1  | 8.0458  | 27.0272  | -1.7481 | Down | 2.74E-57  | 3.09E-56  |
| Unigene30253  | Potri.002G241900.4  | 44.3791 | 149.0723 | -1.7481 | Down | 1.27E-240 | 8.30E-239 |
| Unigene23012  | Potri.014G010000.1  | 40.3838 | 135.664  | -1.7482 | Down | 4.22E-240 | 2.75E-238 |
| Unigene10477  | Potri.007G103700.7  | 18.8641 | 63.3725  | -1.7482 | Down | 2.03E-64  | 2.61E-63  |
| Unigene6242   | Potri.015G007200.1  | 18.8984 | 63.4926  | -1.7483 | Down | 4.77E-45  | 4.19E-44  |
| Unigene33753  | Potri.014G135700.2  | 3.9263  | 13.191   | -1.7483 | Down | 2.52E-23  | 1.25E-22  |
| Unigene27364  | Potri.010G099200.1  | 16.4401 | 55.2309  | -1.7483 | Down | 3.43E-28  | 1.97E-27  |
| Unigene26281  | Potri.013G120700.2  | 20.6636 | 69.428   | -1.7484 | Down | 2.40E-35  | 1.67E-34  |
| Unigene29483  | Potri.009G064600.3  | 3.6495  | 12.2622  | -1.7484 | Down | 1.90E-18  | 7.97E-18  |
| Unigene32300  | Potri.016G075200.3  | 11.1105 | 37.3352  | -1.7486 | Down | 1.24E-49  | 1.20E-48  |
| Unigene44681  | Potri.009G155200.6  | 17.8358 | 59.9347  | -1.7486 | Down | 1.42E-73  | 2.11E-72  |
| Unigene44934  | Potri.008G144200.1  | 9.8204  | 33.0023  | -1.7487 | Down | 8.67E-33  | 5.69E-32  |
| Unigene13902  | Potri.003G087700.10 | 3.0971  | 10.409   | -1.7488 | Down | 6.28E-28  | 3.59E-27  |
| Unigene18450  | Potri.016G042500.1  | 3.8139  | 12.8198  | -1.749  | Down | 3.15E-30  | 1.92E-29  |
| Unigene9604   | Potri.010G254200.1  | 14.302  | 48.0743  | -1.749  | Down | 2.22E-37  | 1.63E-36  |
| Unigene26685  | Potri.001G220100.1  | 11.3258 | 38.0702  | -1.749  | Down | 4.62E-23  | 2.27E-22  |
| Unigene26878  | Potri.007G002800.3  | 23.8082 | 80.0284  | -1.7491 | Down | 1.59E-44  | 1.38E-43  |
| Unigene60422  | Potri.001G358700.1  | 1.8465  | 6.2068   | -1.7491 | Down | 1.27E-08  | 3.34E-08  |
| Unigene21540  | Potri.003G182600.1  | 12.2163 | 41.0678  | -1.7492 | Down | 2.87E-146 | 9.94E-145 |
| Unigene747    | Potri.018G006100.2  | 2.2941  | 7.7132   | -1.7494 | Down | 3.48E-18  | 1.45E-17  |
| Unigene45793  | Potri.006G195600.1  | 39.6959 | 133.4643 | -1.7494 | Down | 2.00E-110 | 4.86E-109 |
| Unigene2287   | Potri.004G058700.2  | 3.9897  | 13.4143  | -1.7494 | Down | 2.91E-44  | 2.51E-43  |
| Unigene60677  | Potri.002G154700.1  | 4.4606  | 14.997   | -1.7494 | Down | 3.48E-18  | 1.45E-17  |

|               |                    |         |          |         |      |           |           |
|---------------|--------------------|---------|----------|---------|------|-----------|-----------|
| Unigene33829  | Potri.017G109000.3 | 3.1971  | 10.7508  | -1.7496 | Down | 5.77E-30  | 3.50E-29  |
| Unigene10241  | Potri.015G117600.1 | 17.8908 | 60.161   | -1.7496 | Down | 7.59E-49  | 7.23E-48  |
| Unigene100313 | Potri.012G060800.1 | 2.3762  | 7.9905   | -1.7496 | Down | 5.83E-11  | 1.75E-10  |
| Unigene112268 | Potri.006G109700.4 | 15.3222 | 51.5238  | -1.7496 | Down | 5.77E-30  | 3.50E-29  |
| Unigene71300  | Potri.001G182700.5 | 12.187  | 40.981   | -1.7496 | Down | 1.71E-20  | 7.74E-20  |
| Unigene47283  | Potri.002G112100.6 | 34.1116 | 114.7167 | -1.7497 | Down | 7.51E-63  | 9.38E-62  |
| Unigene2024   | Potri.014G117900.1 | 16.1688 | 54.3791  | -1.7498 | Down | 1.02E-55  | 1.11E-54  |
| Unigene28185  | Potri.008G117700.1 | 5.0807  | 17.0887  | -1.7499 | Down | 2.74E-13  | 9.28E-13  |
| Unigene1707   | Potri.006G214900.1 | 17.1726 | 57.7579  | -1.7499 | Down | 2.03E-81  | 3.39E-80  |
| Unigene2440   | Potri.002G257800.1 | 14.2556 | 47.947   | -1.7499 | Down | 2.03E-81  | 3.39E-80  |
| Unigene73079  | Potri.004G225700.5 | 21.9514 | 73.8331  | -1.75   | Down | 7.42E-37  | 5.40E-36  |
| Unigene9371   | Potri.012G135000.2 | 7.6793  | 25.8333  | -1.7502 | Down | 1.32E-15  | 4.92E-15  |
| Unigene49622  | Potri.006G273700.1 | 4.0796  | 13.724   | -1.7502 | Down | 1.32E-15  | 4.92E-15  |
| Unigene74743  | Potri.006G132000.4 | 8.4225  | 28.3333  | -1.7502 | Down | 1.32E-15  | 4.92E-15  |
| Unigene42027  | Potri.005G083600.2 | 5.4073  | 18.1903  | -1.7502 | Down | 1.32E-15  | 4.92E-15  |
| Unigene93482  | Potri.004G026200.2 | 3.1242  | 10.51    | -1.7502 | Down | 1.32E-15  | 4.92E-15  |
| Unigene1500   | Potri.001G081600.1 | 35.2119 | 118.4564 | -1.7502 | Down | 3.32E-146 | 1.15E-144 |
| Unigene37807  | Potri.009G156400.1 | 13.0919 | 44.044   | -1.7503 | Down | 5.32E-32  | 3.41E-31  |
| Unigene20047  | Potri.006G113000.1 | 12.387  | 41.6763  | -1.7504 | Down | 6.62E-53  | 6.86E-52  |
| Unigene501    | Potri.001G378000.2 | 17.1425 | 57.6757  | -1.7504 | Down | 1.52E-136 | 4.83E-135 |
| Unigene106389 | Potri.005G105200.1 | 2.6643  | 8.965    | -1.7505 | Down | 1.55E-22  | 7.50E-22  |
| Unigene23121  | Potri.T093400.1    | 9.5372  | 32.0919  | -1.7506 | Down | 1.78E-43  | 1.51E-42  |
| Unigene371    | Potri.012G040700.1 | 8.9447  | 30.0988  | -1.7506 | Down | 1.70E-87  | 3.08E-86  |
| Unigene53734  | Potri.009G069700.1 | 10.4726 | 35.2393  | -1.7506 | Down | 1.55E-22  | 7.50E-22  |
| Unigene19793  | Potri.002G262700.1 | 31.1343 | 104.7804 | -1.7508 | Down | 1.63E-59  | 1.92E-58  |
| Unigene84678  | Potri.015G002300.1 | 31.99   | 107.6849 | -1.7511 | Down | 1.06E-70  | 1.51E-69  |
| Unigene44406  | Potri.009G164400.1 | 14.3952 | 48.4566  | -1.7511 | Down | 4.02E-66  | 5.33E-65  |
| Unigene106274 | Potri.019G133000.1 | 1.228   | 4.1343   | -1.7513 | Down | 2.36E-08  | 6.10E-08  |
| Unigene7054   | Potri.011G138900.1 | 1.6043  | 5.4012   | -1.7513 | Down | 5.46E-06  | 1.18E-05  |
| Unigene42237  | Potri.010G227200.2 | 2.2866  | 7.6983   | -1.7513 | Down | 5.46E-06  | 1.18E-05  |
| Unigene20246  | Potri.008G085800.2 | 2.9255  | 9.8493   | -1.7513 | Down | 1.08E-10  | 3.20E-10  |
| Unigene64890  | Potri.018G020200.5 | 4.0653  | 13.6871  | -1.7514 | Down | 5.06E-13  | 1.69E-12  |
| Unigene55053  | Potri.017G004800.1 | 2.6722  | 8.9967   | -1.7514 | Down | 2.36E-08  | 6.10E-08  |
| Unigene37096  | Potri.015G081500.1 | 1.4277  | 4.8068   | -1.7514 | Down | 5.46E-06  | 1.18E-05  |
| Unigene44243  | Potri.009G168500.1 | 2.0438  | 6.881    | -1.7514 | Down | 5.06E-13  | 1.69E-12  |
| Unigene31943  | Potri.008G195900.4 | 8.5069  | 28.6408  | -1.7514 | Down | 2.78E-61  | 3.39E-60  |
| Unigene30079  | Potri.008G117600.2 | 1.9251  | 6.4815   | -1.7514 | Down | 2.36E-08  | 6.10E-08  |
| Unigene7645   | Potri.006G195900.1 | 3.1535  | 10.617   | -1.7514 | Down | 2.30E-38  | 1.74E-37  |
| Unigene8806   | Potri.005G234900.1 | 7.0626  | 23.7782  | -1.7514 | Down | 5.76E-20  | 2.56E-19  |

|               |                    |         |          |         |      |           |           |
|---------------|--------------------|---------|----------|---------|------|-----------|-----------|
| Unigene24929  | Potri.004G097300.1 | 3.2259  | 10.8609  | -1.7514 | Down | 1.08E-10  | 3.20E-10  |
| Unigene24111  | Potri.001G252500.2 | 8.8808  | 29.8997  | -1.7514 | Down | 1.55E-47  | 1.43E-46  |
| Unigene53494  | Potri.008G051700.3 | 33.6247 | 113.2312 | -1.7517 | Down | 3.77E-54  | 4.00E-53  |
| Unigene50211  | Potri.010G245000.1 | 4.5694  | 15.3885  | -1.7518 | Down | 2.14E-40  | 1.69E-39  |
| Unigene47405  | Potri.003G217900.5 | 38.2452 | 128.8191 | -1.752  | Down | 5.50E-106 | 1.26E-104 |
| Unigene108534 | Potri.016G105700.1 | 14.1667 | 47.7199  | -1.7521 | Down | 2.59E-24  | 1.33E-23  |
| Unigene9786   | Potri.011G156900.1 | 10.303  | 34.7054  | -1.7521 | Down | 2.59E-24  | 1.33E-23  |
| Unigene5232   | Potri.011G136000.2 | 21.0904 | 71.0435  | -1.7521 | Down | 2.30E-67  | 3.10E-66  |
| Unigene6403   | Potri.008G055400.1 | 6.7275  | 22.6615  | -1.7521 | Down | 2.59E-24  | 1.33E-23  |
| Unigene5877   | Potri.016G005400.2 | 14.8313 | 49.9632  | -1.7522 | Down | 3.91E-40  | 3.07E-39  |
| Unigene578    | Potri.012G070500.2 | 14.2195 | 47.9021  | -1.7522 | Down | 1.52E-78  | 2.44E-77  |
| Unigene16659  | Potri.009G047000.1 | 12.3677 | 41.6657  | -1.7523 | Down | 7.70E-38  | 5.73E-37  |
| Unigene37485  | Potri.013G012500.1 | 6.793   | 22.8869  | -1.7524 | Down | 2.16E-17  | 8.70E-17  |
| Unigene62018  | Potri.010G023800.1 | 5.7951  | 19.525   | -1.7524 | Down | 2.16E-17  | 8.70E-17  |
| Unigene28303  | Potri.003G204500.4 | 1.8376  | 6.1921   | -1.7526 | Down | 4.46E-15  | 1.63E-14  |
| Unigene38546  | Potri.017G109600.1 | 6.6122  | 22.2845  | -1.7528 | Down | 2.78E-35  | 1.94E-34  |
| Unigene45189  | Potri.010G219700.1 | 7.0718  | 23.8324  | -1.7528 | Down | 8.79E-49  | 8.37E-48  |
| Unigene83560  | Potri.003G168800.1 | 10.7357 | 36.1815  | -1.7528 | Down | 4.75E-24  | 2.41E-23  |
| Unigene21711  | Potri.002G230600.1 | 6.4621  | 21.7786  | -1.7528 | Down | 2.15E-102 | 4.73E-101 |
| Unigene44192  | Potri.014G000900.2 | 17.5859 | 59.272   | -1.7529 | Down | 7.13E-118 | 1.88E-116 |
| Unigene50086  | Potri.006G220000.1 | 4.9998  | 16.8511  | -1.7529 | Down | 1.40E-66  | 1.87E-65  |
| Unigene1431   | Potri.017G036400.1 | 2.8725  | 9.6829   | -1.7531 | Down | 1.31E-39  | 1.01E-38  |
| Unigene33352  | Potri.014G127800.1 | 10.3983 | 35.0536  | -1.7532 | Down | 3.15E-46  | 2.84E-45  |
| Unigene56140  | Potri.011G072600.1 | 6.0766  | 20.4848  | -1.7532 | Down | 4.97E-64  | 6.34E-63  |
| Unigene23574  | Potri.002G032900.1 | 2.5357  | 8.5482   | -1.7532 | Down | 1.99E-10  | 5.82E-10  |
| Unigene73290  | Potri.006G059700.1 | 26.1097 | 88.0247  | -1.7533 | Down | 6.18E-44  | 5.29E-43  |
| Unigene53932  | Potri.004G177000.1 | 16.1741 | 54.5286  | -1.7533 | Down | 6.18E-44  | 5.29E-43  |
| Unigene54158  | Potri.004G197400.1 | 64.2606 | 216.6507 | -1.7534 | Down | 1.53E-183 | 7.15E-182 |
| Unigene16017  | Potri.018G046400.1 | 7.2714  | 24.5173  | -1.7535 | Down | 3.97E-17  | 1.58E-16  |
| Unigene16450  | Potri.008G200600.1 | 7.6585  | 25.8224  | -1.7535 | Down | 3.97E-17  | 1.58E-16  |
| Unigene18362  | Potri.002G206200.1 | 8.8272  | 29.7652  | -1.7536 | Down | 9.82E-128 | 2.85E-126 |
| Unigene12985  | Potri.002G181600.1 | 5.9478  | 20.0564  | -1.7536 | Down | 1.40E-52  | 1.44E-51  |
| Unigene67138  | Potri.016G060200.3 | 7.5087  | 25.3213  | -1.7537 | Down | 4.71E-37  | 3.44E-36  |
| Unigene33255  | Potri.006G096000.3 | 12.744  | 42.9758  | -1.7537 | Down | 4.71E-37  | 3.44E-36  |
| Unigene19831  | Potri.001G197300.2 | 20.3199 | 68.5248  | -1.7537 | Down | 1.13E-43  | 9.62E-43  |
| Unigene17489  | Potri.013G034700.1 | 1.9859  | 6.6975   | -1.7538 | Down | 4.38E-08  | 1.11E-07  |
| Unigene45634  | Potri.004G077400.1 | 5.5845  | 18.8333  | -1.7538 | Down | 1.66E-63  | 2.10E-62  |
| Unigene119023 | Potri.TI69900.1    | 1.5598  | 5.2606   | -1.7539 | Down | 4.38E-08  | 1.11E-07  |
| Unigene52795  | Potri.011G154600.1 | 2.3249  | 7.841    | -1.7539 | Down | 4.38E-08  | 1.11E-07  |

|               |                    |         |          |         |      |           |           |
|---------------|--------------------|---------|----------|---------|------|-----------|-----------|
| Unigene30376  | Potri.009G169500.2 | 3.6351  | 12.2599  | -1.7539 | Down | 4.38E-08  | 1.11E-07  |
| Unigene33954  | Potri.008G178600.1 | 1.6035  | 5.4081   | -1.7539 | Down | 4.38E-08  | 1.11E-07  |
| Unigene46253  | Potri.004G190400.1 | 3.7138  | 12.5253  | -1.7539 | Down | 4.38E-08  | 1.11E-07  |
| Unigene31960  | Potri.004G013300.1 | 4.5719  | 15.4194  | -1.7539 | Down | 3.14E-94  | 6.21E-93  |
| Unigene7643   | Potri.001G455800.2 | 3.2619  | 11.0013  | -1.7539 | Down | 4.38E-08  | 1.11E-07  |
| Unigene3417   | Potri.015G117200.1 | 19.8727 | 67.0302  | -1.754  | Down | 4.37E-39  | 3.35E-38  |
| Unigene9047   | Potri.001G166100.4 | 32.4793 | 109.5511 | -1.754  | Down | 4.68E-83  | 7.99E-82  |
| Unigene51532  | Potri.012G036300.1 | 17.5907 | 59.3352  | -1.7541 | Down | 1.23E-56  | 1.37E-55  |
| Unigene38664  | Potri.002G139500.1 | 11.4357 | 38.5732  | -1.7541 | Down | 1.84E-32  | 1.20E-31  |
| Unigene11191  | Potri.001G359900.1 | 25.2411 | 85.1413  | -1.7541 | Down | 2.08E-214 | 1.17E-212 |
| Unigene40667  | Potri.014G089100.1 | 6.2336  | 21.0284  | -1.7542 | Down | 3.56E-19  | 1.54E-18  |
| Unigene47853  | Potri.007G000400.6 | 9.2868  | 31.3281  | -1.7542 | Down | 3.56E-19  | 1.54E-18  |
| Unigene21764  | Potri.006G132300.1 | 15.1386 | 51.0687  | -1.7542 | Down | 8.36E-153 | 3.08E-151 |
| Unigene11916  | Potri.002G096600.1 | 43.7552 | 147.6034 | -1.7542 | Down | 2.23E-194 | 1.12E-192 |
| Unigene42207  | Potri.001G068000.5 | 26.629  | 89.8317  | -1.7542 | Down | 8.54E-83  | 1.45E-81  |
| Unigene28832  | Potri.012G124400.1 | 5.2002  | 17.544   | -1.7543 | Down | 3.08E-113 | 7.69E-112 |
| Unigene47337  | Potri.006G108800.1 | 17.9931 | 60.7023  | -1.7543 | Down | 4.05E-41  | 3.27E-40  |
| Unigene34155  | Potri.005G124100.1 | 4.716   | 15.9099  | -1.7543 | Down | 3.66E-30  | 2.23E-29  |
| Unigene116430 | Potri.010G014500.1 | 4.4432  | 14.9907  | -1.7544 | Down | 1.72E-12  | 5.59E-12  |
| Unigene34367  | Potri.009G132800.1 | 4.5821  | 15.4592  | -1.7544 | Down | 1.70E-34  | 1.16E-33  |
| Unigene24586  | Potri.006G155400.1 | 4.3746  | 14.7594  | -1.7544 | Down | 1.72E-12  | 5.59E-12  |
| Unigene2402   | Potri.012G102500.2 | 16.6909 | 56.3171  | -1.7545 | Down | 3.69E-91  | 7.02E-90  |
| Unigene63330  | Potri.001G077100.2 | 2.6288  | 8.8707   | -1.7546 | Down | 7.29E-17  | 2.88E-16  |
| Unigene41593  | Potri.018G113100.1 | 28.1543 | 95.0088  | -1.7547 | Down | 1.20E-125 | 3.42E-124 |
| Unigene51513  | Potri.002G154700.1 | 10.702  | 36.1158  | -1.7547 | Down | 3.22E-21  | 1.49E-20  |
| Unigene36730  | Potri.010G201600.2 | 13.9517 | 47.0872  | -1.7549 | Down | 6.69E-30  | 4.05E-29  |
| Unigene28403  | Potri.003G194400.2 | 35.32   | 119.2086 | -1.7549 | Down | 2.92E-99  | 6.21E-98  |
| Unigene33450  | Potri.007G064900.1 | 9.0123  | 30.4195  | -1.755  | Down | 1.56E-51  | 1.57E-50  |
| Unigene17248  | Potri.006G129100.2 | 10.6096 | 35.8095  | -1.755  | Down | 1.46E-38  | 1.11E-37  |
| Unigene52891  | Potri.018G129900.2 | 2.2246  | 7.5098   | -1.7552 | Down | 3.68E-10  | 1.06E-09  |
| Unigene50778  | Potri.015G088300.2 | 12.4332 | 41.9712  | -1.7552 | Down | 1.35E-40  | 1.08E-39  |
| Unigene42061  | Potri.010G229200.1 | 1.6852  | 5.6889   | -1.7552 | Down | 1.02E-05  | 2.16E-05  |
| Unigene30281  | Potri.005G155600.3 | 1.6701  | 5.6379   | -1.7552 | Down | 1.02E-05  | 2.16E-05  |
| Unigene28451  | Potri.005G097000.1 | 2.4702  | 8.3387   | -1.7552 | Down | 3.68E-10  | 1.06E-09  |
| Unigene35755  | Potri.003G131300.5 | 6.5057  | 21.9617  | -1.7552 | Down | 1.51E-14  | 5.39E-14  |
| Unigene38139  | Potri.010G043200.3 | 14      | 47.2639  | -1.7553 | Down | 1.73E-81  | 2.89E-80  |
| Unigene5311   | Potri.011G142300.1 | 7.6464  | 25.819   | -1.7556 | Down | 2.67E-25  | 1.41E-24  |
| Unigene77787  | Potri.005G211500.2 | 26.2538 | 88.6489  | -1.7556 | Down | 5.58E-49  | 5.33E-48  |
| Unigene10316  | Potri.019G056700.1 | 39.5227 | 133.4628 | -1.7557 | Down | 6.63E-94  | 1.31E-92  |

|               |                    |         |          |         |      |           |           |
|---------------|--------------------|---------|----------|---------|------|-----------|-----------|
| Unigene13447  | Potri.013G102900.1 | 11.3982 | 38.4914  | -1.7557 | Down | 2.80E-85  | 4.94E-84  |
| Unigene11809  | Potri.006G193600.1 | 24.2107 | 81.7561  | -1.7557 | Down | 6.75E-186 | 3.22E-184 |
| Unigene18578  | Potri.015G000400.1 | 4.4182  | 14.9207  | -1.7558 | Down | 1.34E-16  | 5.23E-16  |
| Unigene34359  | Potri.010G181700.2 | 2.3916  | 8.0767   | -1.7558 | Down | 1.34E-16  | 5.23E-16  |
| Unigene28047  | Potri.002G021700.1 | 10.2352 | 34.5656  | -1.7558 | Down | 1.13E-31  | 7.18E-31  |
| Unigene35434  | Potri.018G055300.1 | 60.451  | 204.1593 | -1.7559 | Down | 1.47E-123 | 4.10E-122 |
| Unigene31936  | Potri.006G184700.2 | 3.313   | 11.1893  | -1.7559 | Down | 2.44E-27  | 1.37E-26  |
| Unigene10602  | Potri.017G106100.1 | 17.1147 | 57.8068  | -1.756  | Down | 0         | 0         |
| Unigene29838  | Potri.011G083100.1 | 41.8833 | 141.4713 | -1.7561 | Down | 5.78E-136 | 1.82E-134 |
| Unigene49349  | Potri.009G080500.4 | 4.7225  | 15.9534  | -1.7562 | Down | 1.20E-18  | 5.08E-18  |
| Unigene13087  | Potri.014G139600.1 | 1.8602  | 6.2842   | -1.7563 | Down | 1.20E-18  | 5.08E-18  |
| Unigene77555  | Potri.002G228900.7 | 16.5597 | 55.9475  | -1.7564 | Down | 2.06E-31  | 1.30E-30  |
| Unigene22912  | Potri.017G151100.1 | 12.0675 | 40.7762  | -1.7566 | Down | 3.29E-65  | 4.28E-64  |
| Unigene115703 | Potri.008G178200.1 | 2.7723  | 9.3675   | -1.7566 | Down | 8.14E-08  | 2.03E-07  |
| Unigene8744   | Potri.008G143000.1 | 2.9624  | 10.01    | -1.7566 | Down | 8.14E-08  | 2.03E-07  |
| Unigene45274  | Potri.008G129600.1 | 6.4613  | 21.8329  | -1.7566 | Down | 1.08E-20  | 4.93E-20  |
| Unigene27005  | Potri.008G129100.1 | 8.9438  | 30.221   | -1.7566 | Down | 4.47E-27  | 2.49E-26  |
| Unigene48181  | Potri.006G125000.1 | 3.1806  | 10.7472  | -1.7566 | Down | 8.14E-08  | 2.03E-07  |
| Unigene21674  | Potri.005G026400.2 | 1.9561  | 6.6097   | -1.7566 | Down | 4.47E-27  | 2.49E-26  |
| Unigene11043  | Potri.016G025300.1 | 4.4215  | 14.9422  | -1.7568 | Down | 1.76E-35  | 1.24E-34  |
| Unigene53405  | Potri.006G099600.2 | 5.5715  | 18.8289  | -1.7568 | Down | 4.10E-29  | 2.43E-28  |
| Unigene42     | Potri.019G126000.1 | 7.9675  | 26.9283  | -1.7569 | Down | 1.65E-222 | 9.74E-221 |
| Unigene10638  | Potri.008G100600.1 | 9.7858  | 33.0721  | -1.7569 | Down | 0         | 0         |
| Unigene18264  | Potri.002G259900.1 | 7.7185  | 26.0866  | -1.7569 | Down | 1.33E-58  | 1.54E-57  |
| Unigene21215  | Potri.004G137100.2 | 6.039   | 20.4115  | -1.757  | Down | 2.40E-75  | 3.68E-74  |
| Unigene28127  | Potri.018G026600.1 | 8.1307  | 27.4836  | -1.7571 | Down | 8.95E-25  | 4.65E-24  |
| Unigene495    | Potri.014G029400.1 | 10.5474 | 35.6521  | -1.7571 | Down | 8.42E-109 | 2.00E-107 |
| Unigene32754  | Potri.008G025900.3 | 10.3012 | 34.819   | -1.7571 | Down | 2.77E-54  | 2.95E-53  |
| Unigene6009   | Potri.003G040900.1 | 6.5295  | 22.0711  | -1.7571 | Down | 8.95E-25  | 4.65E-24  |
| Unigene86595  | Potri.001G143400.8 | 59.0884 | 199.7324 | -1.7571 | Down | 3.28E-140 | 1.07E-138 |
| Unigene118211 | Potri.010G250800.2 | 9.7732  | 33.0369  | -1.7572 | Down | 3.48E-33  | 2.31E-32  |
| Unigene6889   | Potri.009G100800.3 | 13.9664 | 47.2131  | -1.7572 | Down | 5.80E-50  | 5.66E-49  |
| Unigene78397  | Potri.006G232900.6 | 17.2273 | 58.2345  | -1.7572 | Down | 3.48E-33  | 2.31E-32  |
| Unigene15742  | Potri.018G051800.1 | 2.5392  | 8.5842   | -1.7573 | Down | 6.80E-10  | 1.93E-09  |
| Unigene104887 | Potri.008G026600.1 | 1.5192  | 5.136    | -1.7573 | Down | 6.80E-10  | 1.93E-09  |
| Unigene13244  | Potri.004G077100.1 | 1.8845  | 6.3708   | -1.7573 | Down | 2.20E-18  | 9.24E-18  |
| Unigene32252  | Potri.014G154800.1 | 33.4388 | 113.0617 | -1.7575 | Down | 6.00E-304 | 5.40E-302 |
| Unigene34141  | Potri.012G038300.3 | 42.431  | 143.4643 | -1.7575 | Down | 0         | 0         |
| Unigene29199  | Potri.005G010900.1 | 3.0573  | 10.3377  | -1.7576 | Down | 1.99E-20  | 8.97E-20  |

|               |                    |         |          |         |      |           |           |
|---------------|--------------------|---------|----------|---------|------|-----------|-----------|
| Unigene15254  | Potri.001G140800.1 | 9.6592  | 32.6605  | -1.7576 | Down | 1.99E-20  | 8.97E-20  |
| Unigene6316   | Potri.018G027700.1 | 7.5016  | 25.3683  | -1.7578 | Down | 1.80E-22  | 8.69E-22  |
| Unigene43927  | Potri.018G008600.1 | 2.1905  | 7.4077   | -1.7578 | Down | 1.80E-22  | 8.69E-22  |
| Unigene41962  | Potri.006G093800.2 | 7.9455  | 26.8694  | -1.7578 | Down | 1.80E-22  | 8.69E-22  |
| Unigene735    | Potri.006G058900.3 | 10.2931 | 34.8085  | -1.7578 | Down | 2.83E-230 | 1.74E-228 |
| Unigene22433  | Potri.002G068200.3 | 10.2404 | 34.6323  | -1.7578 | Down | 5.24E-89  | 9.70E-88  |
| Unigene35618  | Potri.001G399700.1 | 9.4896  | 32.0914  | -1.7578 | Down | 1.80E-22  | 8.69E-22  |
| Unigene32224  | Potri.009G147600.2 | 4.164   | 14.0839  | -1.758  | Down | 1.93E-49  | 1.87E-48  |
| Unigene6738   | Potri.001G258000.1 | 4.5565  | 15.4119  | -1.758  | Down | 1.50E-26  | 8.23E-26  |
| Unigene9439   | Potri.007G121400.1 | 6.7961  | 22.9873  | -1.7581 | Down | 5.11E-14  | 1.78E-13  |
| Unigene33444  | Potri.001G141200.1 | 4.0293  | 13.6295  | -1.7581 | Down | 1.69E-53  | 1.77E-52  |
| Unigene1237   | Potri.018G149100.1 | 9.0533  | 30.6266  | -1.7583 | Down | 1.38E-59  | 1.63E-58  |
| Unigene481    | Potri.007G069300.2 | 14.7136 | 49.7772  | -1.7583 | Down | 3.79E-47  | 3.49E-46  |
| Unigene57704  | Potri.012G024800.3 | 4.7037  | 15.9141  | -1.7584 | Down | 4.05E-18  | 1.68E-17  |
| Unigene13604  | Potri.011G141400.1 | 5.2565  | 17.7835  | -1.7584 | Down | 4.05E-80  | 6.66E-79  |
| Unigene15736  | Potri.006G151800.1 | 8.2406  | 27.8804  | -1.7584 | Down | 4.05E-18  | 1.68E-17  |
| Unigene10849  | Potri.004G234300.1 | 8.9048  | 30.126   | -1.7584 | Down | 5.34E-109 | 1.27E-107 |
| Unigene110744 | Potri.002G117000.6 | 19.9701 | 67.568   | -1.7585 | Down | 9.97E-37  | 7.24E-36  |
| Unigene12479  | Potri.009G100800.3 | 20.8083 | 70.4171  | -1.7588 | Down | 1.72E-71  | 2.48E-70  |
| Unigene4048   | Potri.006G262200.1 | 12.5812 | 42.5772  | -1.7588 | Down | 2.75E-26  | 1.50E-25  |
| Unigene46078  | Potri.004G223700.1 | 17.0724 | 57.7787  | -1.7589 | Down | 5.27E-55  | 5.69E-54  |
| Unigene44367  | Potri.015G035600.1 | 5.6867  | 19.2484  | -1.7591 | Down | 1.69E-38  | 1.28E-37  |
| Unigene41247  | Potri.015G034700.1 | 34.8853 | 118.0847 | -1.7591 | Down | 2.05E-85  | 3.63E-84  |
| Unigene38122  | Potri.015G013400.2 | 15.2316 | 51.5559  | -1.7591 | Down | 1.69E-38  | 1.28E-37  |
| Unigene13153  | Potri.006G133900.3 | 7.364   | 24.9258  | -1.7591 | Down | 2.62E-77  | 4.13E-76  |
| Unigene14668  | Potri.001G368600.1 | 15.2808 | 51.7222  | -1.7591 | Down | 1.69E-38  | 1.28E-37  |
| Unigene102019 | Potri.004G048900.3 | 15.674  | 53.0582  | -1.7592 | Down | 1.28E-101 | 2.80E-100 |
| Unigene45631  | Potri.001G209100.1 | 4.8954  | 16.5715  | -1.7592 | Down | 1.03E-52  | 1.06E-51  |
| Unigene82     | Potri.007G070400.2 | 6.2709  | 21.2284  | -1.7593 | Down | 1.12E-168 | 4.71E-167 |
| Unigene3231   | Potri.019G064200.1 | 10.7929 | 36.5449  | -1.7596 | Down | 4.79E-97  | 9.87E-96  |
| Unigene3712   | Potri.018G017200.1 | 17.2564 | 58.4302  | -1.7596 | Down | 2.16E-48  | 2.04E-47  |
| Unigene31362  | Potri.017G041800.4 | 13.3515 | 45.2084  | -1.7596 | Down | 3.09E-38  | 2.32E-37  |
| Unigene6559   | Potri.016G117800.1 | 1.6818  | 5.6945   | -1.7596 | Down | 1.26E-09  | 3.51E-09  |
| Unigene36319  | Potri.012G093500.1 | 10.0699 | 34.0965  | -1.7596 | Down | 4.24E-30  | 2.58E-29  |
| Unigene4329   | Potri.010G225100.1 | 5.751   | 19.473   | -1.7596 | Down | 1.08E-11  | 3.37E-11  |
| Unigene99833  | Potri.010G214300.1 | 1.2553  | 4.2504   | -1.7596 | Down | 1.92E-05  | 3.95E-05  |
| Unigene41609  | Potri.010G180400.8 | 1.637   | 5.5428   | -1.7596 | Down | 1.92E-05  | 3.95E-05  |
| Unigene106185 | Potri.010G098900.1 | 1.5969  | 5.4072   | -1.7596 | Down | 1.92E-05  | 3.95E-05  |
| Unigene81167  | Potri.009G064100.1 | 30.9601 | 104.831  | -1.7596 | Down | 1.35E-62  | 1.68E-61  |



|               |                    |          |          |         |      |           |           |
|---------------|--------------------|----------|----------|---------|------|-----------|-----------|
| Unigene25487  | Potri.009G052900.1 | 2.8227   | 9.5576   | -1.7596 | Down | 1.26E-09  | 3.51E-09  |
| Unigene117268 | Potri.007G098400.2 | 2.219    | 7.5134   | -1.7596 | Down | 1.51E-07  | 3.71E-07  |
| Unigene35157  | Potri.007G096200.1 | 25.373   | 85.9132  | -1.7596 | Down | 1.27E-64  | 1.64E-63  |
| Unigene18381  | Potri.006G017400.1 | 4.2394   | 14.3546  | -1.7596 | Down | 3.34E-36  | 2.39E-35  |
| Unigene15935  | Potri.005G257600.1 | 1.3022   | 4.4093   | -1.7596 | Down | 1.92E-05  | 3.95E-05  |
| Unigene45498  | Potri.005G219500.1 | 7.6793   | 26.0022  | -1.7596 | Down | 2.67E-42  | 2.21E-41  |
| Unigene62305  | Potri.005G207700.1 | 1.2644   | 4.2812   | -1.7596 | Down | 1.92E-05  | 3.95E-05  |
| Unigene31079  | Potri.004G037200.2 | 1.6217   | 5.4911   | -1.7596 | Down | 1.51E-07  | 3.71E-07  |
| Unigene119075 | Potri.003G078300.1 | 1.3766   | 4.6612   | -1.7596 | Down | 1.51E-07  | 3.71E-07  |
| Unigene28187  | Potri.003G031200.1 | 3.1648   | 10.7161  | -1.7596 | Down | 1.26E-09  | 3.51E-09  |
| Unigene114199 | Potri.002G157200.1 | 6.871    | 23.2651  | -1.7596 | Down | 8.32E-16  | 3.14E-15  |
| Unigene19524  | Potri.001G420300.1 | 7.5802   | 25.6667  | -1.7596 | Down | 6.69E-20  | 2.97E-19  |
| Unigene42664  | Potri.001G317900.1 | 16.0931  | 54.4913  | -1.7596 | Down | 1.13E-236 | 7.20E-235 |
| Unigene9860   | Potri.001G116000.3 | 12.8258  | 43.4282  | -1.7596 | Down | 4.24E-30  | 2.58E-29  |
| Unigene111380 | Potri.011G119700.2 | 105.6285 | 357.683  | -1.7597 | Down | 6.53E-192 | 3.24E-190 |
| Unigene38761  | Potri.009G168100.2 | 18.4022  | 62.3226  | -1.7599 | Down | 2.17E-66  | 2.89E-65  |
| Unigene32051  | Potri.012G124400.1 | 8.6719   | 29.3722  | -1.76   | Down | 6.40E-173 | 2.75E-171 |
| Unigene32822  | Potri.012G115900.1 | 9.0155   | 30.5357  | -1.76   | Down | 4.22E-46  | 3.80E-45  |
| Unigene77113  | Potri.002G016900.1 | 23.7805  | 80.5459  | -1.76   | Down | 4.53E-44  | 3.89E-43  |
| Unigene49223  | Potri.001G216600.1 | 30.854   | 104.5043 | -1.76   | Down | 2.14E-86  | 3.83E-85  |
| Unigene38543  | Potri.003G221200.3 | 8.6812   | 29.4057  | -1.7601 | Down | 6.10E-36  | 4.33E-35  |
| Unigene35411  | Potri.003G110000.5 | 27.5382  | 93.281   | -1.7601 | Down | 2.44E-102 | 5.38E-101 |
| Unigene46234  | Potri.008G080200.1 | 53.4186  | 180.9593 | -1.7603 | Down | 0         | 0         |
| Unigene26245  | Potri.004G226400.1 | 12.9612  | 43.9089  | -1.7603 | Down | 8.44E-28  | 4.81E-27  |
| Unigene555    | Potri.010G098800.4 | 16.3113  | 55.2599  | -1.7604 | Down | 4.35E-124 | 1.22E-122 |
| Unigene28672  | Potri.005G041000.3 | 4.6972   | 15.9143  | -1.7605 | Down | 7.71E-46  | 6.90E-45  |
| Unigene43143  | Potri.004G108200.1 | 1.938    | 6.5664   | -1.7605 | Down | 1.11E-21  | 5.22E-21  |
| Unigene68800  | Potri.003G110300.2 | 3.1196   | 10.5699  | -1.7605 | Down | 1.11E-21  | 5.22E-21  |
| Unigene85165  | Potri.005G148100.1 | 32.3437  | 109.596  | -1.7606 | Down | 1.03E-73  | 1.53E-72  |
| Unigene21845  | Potri.018G106900.1 | 2.2618   | 7.6649   | -1.7608 | Down | 1.37E-17  | 5.55E-17  |
| Unigene27009  | Potri.019G071800.1 | 11.3329  | 38.4071  | -1.7609 | Down | 1.31E-31  | 8.30E-31  |
| Unigene108938 | Potri.013G075300.2 | 8.4852   | 28.7581  | -1.7609 | Down | 1.53E-15  | 5.71E-15  |
| Unigene55502  | Potri.005G224000.3 | 6.282    | 21.2911  | -1.761  | Down | 1.53E-15  | 5.71E-15  |
| Unigene41027  | Potri.012G024800.3 | 12.0471  | 40.8342  | -1.7611 | Down | 3.03E-77  | 4.77E-76  |
| Unigene41925  | Potri.019G049000.2 | 3.206    | 10.8677  | -1.7612 | Down | 1.73E-13  | 5.91E-13  |
| Unigene42193  | Potri.013G012400.4 | 3.685    | 12.4913  | -1.7612 | Down | 1.73E-13  | 5.91E-13  |
| Unigene20973  | Potri.012G079600.2 | 3.0895   | 10.4725  | -1.7612 | Down | 1.73E-13  | 5.91E-13  |
| Unigene19180  | Potri.001G157300.1 | 18.4904  | 62.6821  | -1.7613 | Down | 2.04E-35  | 1.43E-34  |
| Unigene18788  | Potri.014G117500.2 | 27.9328  | 94.6965  | -1.7614 | Down | 9.54E-99  | 2.02E-97  |

|               |                    |         |          |         |      |           |           |
|---------------|--------------------|---------|----------|---------|------|-----------|-----------|
| Unigene645    | Potri.007G034900.1 | 9.5662  | 32.4318  | -1.7614 | Down | 4.40E-65  | 5.72E-64  |
| Unigene31513  | Potri.006G208900.2 | 5.0255  | 17.0377  | -1.7614 | Down | 2.21E-33  | 1.47E-32  |
| Unigene48993  | Potri.003G136000.4 | 3.5623  | 12.0781  | -1.7615 | Down | 1.99E-11  | 6.14E-11  |
| Unigene40514  | Potri.010G208200.1 | 16.7936 | 56.9449  | -1.7617 | Down | 2.60E-29  | 1.55E-28  |
| Unigene25286  | Potri.008G149800.1 | 1.7304  | 5.869    | -1.762  | Down | 2.33E-09  | 6.41E-09  |
| Unigene38722  | Potri.002G146200.3 | 19.1363 | 64.9078  | -1.7621 | Down | 2.21E-70  | 3.13E-69  |
| Unigene53543  | Potri.003G194000.6 | 13.1437 | 44.5864  | -1.7622 | Down | 3.39E-23  | 1.67E-22  |
| Unigene7808   | Potri.001G387300.1 | 15.9416 | 54.0776  | -1.7622 | Down | 2.68E-152 | 9.82E-151 |
| Unigene17824  | Potri.004G091100.2 | 15.1451 | 51.3777  | -1.7623 | Down | 6.31E-37  | 4.60E-36  |
| Unigene39884  | Potri.013G043500.1 | 8.3282  | 28.2537  | -1.7624 | Down | 4.76E-29  | 2.81E-28  |
| Unigene33138  | Potri.008G214300.2 | 4.7638  | 16.1614  | -1.7624 | Down | 2.81E-15  | 1.04E-14  |
| Unigene20535  | Potri.008G047100.2 | 4.0581  | 13.7672  | -1.7624 | Down | 2.81E-15  | 1.04E-14  |
| Unigene74919  | Potri.016G016900.1 | 30.9689 | 105.0714 | -1.7625 | Down | 2.03E-54  | 2.17E-53  |
| Unigene57848  | Potri.015G000100.2 | 4.1103  | 13.9459  | -1.7625 | Down | 3.73E-21  | 1.73E-20  |
| Unigene16930  | Potri.006G262200.1 | 14.6626 | 49.7465  | -1.7625 | Down | 6.82E-35  | 4.71E-34  |
| Unigene13889  | Potri.001G211600.2 | 4.7141  | 15.9939  | -1.7625 | Down | 6.82E-35  | 4.71E-34  |
| Unigene17800  | Potri.013G073400.1 | 11.7384 | 39.8306  | -1.7626 | Down | 7.38E-33  | 4.85E-32  |
| Unigene16804  | Potri.006G193900.1 | 6.2263  | 21.127   | -1.7626 | Down | 7.38E-33  | 4.85E-32  |
| Unigene17067  | Potri.010G002400.2 | 24.8137 | 84.2016  | -1.7627 | Down | 3.95E-93  | 7.71E-92  |
| Unigene18465  | Potri.002G153700.1 | 4.4843  | 15.2162  | -1.7627 | Down | 7.38E-33  | 4.85E-32  |
| Unigene31232  | Potri.010G078200.1 | 4.4055  | 14.9508  | -1.7628 | Down | 4.13E-19  | 1.78E-18  |
| Unigene6420   | Potri.011G091900.1 | 2.5417  | 8.6258   | -1.7629 | Down | 5.66E-25  | 2.96E-24  |
| Unigene36527  | Potri.009G122100.1 | 1.5224  | 5.1667   | -1.7629 | Down | 2.82E-07  | 6.78E-07  |
| Unigene39265  | Potri.008G078500.2 | 3.1476  | 10.6821  | -1.7629 | Down | 5.66E-25  | 2.96E-24  |
| Unigene27527  | Potri.005G174600.1 | 6.0897  | 20.6667  | -1.7629 | Down | 3.19E-13  | 1.07E-12  |
| Unigene35309  | Potri.002G051800.2 | 19.5741 | 66.4286  | -1.7629 | Down | 3.71E-54  | 3.94E-53  |
| Unigene9336   | Potri.001G322100.1 | 1.273   | 4.3203   | -1.7629 | Down | 2.82E-07  | 6.78E-07  |
| Unigene88467  | Potri.009G088900.3 | 12.6193 | 42.8321  | -1.7631 | Down | 1.25E-34  | 8.56E-34  |
| Unigene8316   | Potri.002G042000.1 | 10.3714 | 35.2041  | -1.7631 | Down | 4.25E-50  | 4.16E-49  |
| Unigene46420  | Potri.010G056300.1 | 5.676   | 19.2675  | -1.7632 | Down | 3.72E-75  | 5.67E-74  |
| Unigene38618  | Potri.013G011900.1 | 7.8917  | 26.7901  | -1.7633 | Down | 1.35E-32  | 8.81E-32  |
| Unigene44885  | Potri.009G007900.2 | 4.679   | 15.8839  | -1.7633 | Down | 1.35E-32  | 8.81E-32  |
| Unigene23021  | Potri.008G038700.1 | 8.3221  | 28.2522  | -1.7633 | Down | 3.09E-42  | 2.55E-41  |
| Unigene82496  | Potri.004G001600.1 | 15.0907 | 51.2285  | -1.7633 | Down | 1.35E-32  | 8.81E-32  |
| Unigene81964  | Potri.002G246100.2 | 12.4332 | 42.21    | -1.7634 | Down | 9.49E-27  | 5.24E-26  |
| Unigene113597 | Potri.001G066800.1 | 12.4816 | 42.3743  | -1.7634 | Down | 9.49E-27  | 5.24E-26  |
| Unigene77280  | Potri.014G140900.1 | 35.3535 | 120.0315 | -1.7635 | Down | 2.79E-65  | 3.64E-64  |
| Unigene50219  | Potri.006G212800.1 | 9.3375  | 31.7023  | -1.7635 | Down | 1.16E-55  | 1.27E-54  |
| Unigene71786  | Potri.004G039500.1 | 18.1013 | 61.4597  | -1.7635 | Down | 1.47E-30  | 9.03E-30  |

|               |                    |         |          |         |      |           |           |
|---------------|--------------------|---------|----------|---------|------|-----------|-----------|
| Unigene33130  | Potri.003G101600.1 | 33.5358 | 113.8581 | -1.7635 | Down | 1.64E-232 | 1.02E-230 |
| Unigene23089  | Potri.001G319100.1 | 73.4395 | 249.3357 | -1.7635 | Down | 6.39E-223 | 3.77E-221 |
| Unigene31127  | Potri.015G111200.1 | 3.6853  | 12.5128  | -1.7636 | Down | 3.67E-11  | 1.12E-10  |
| Unigene28730  | Potri.013G052700.2 | 8.1193  | 27.5677  | -1.7636 | Down | 7.76E-50  | 7.55E-49  |
| Unigene77716  | Potri.006G212800.1 | 10.5655 | 35.8735  | -1.7636 | Down | 6.85E-21  | 3.14E-20  |
| Unigene110315 | Potri.003G022100.6 | 5.5445  | 18.8255  | -1.7636 | Down | 3.67E-11  | 1.12E-10  |
| Unigene17676  | Potri.001G197500.1 | 3.8465  | 13.0602  | -1.7636 | Down | 3.67E-11  | 1.12E-10  |
| Unigene6103   | Potri.013G073400.1 | 6.9369  | 23.5555  | -1.7637 | Down | 1.98E-57  | 2.24E-56  |
| Unigene10025  | Potri.008G205700.1 | 16.3595 | 55.5543  | -1.7638 | Down | 3.58E-38  | 2.68E-37  |
| Unigene22295  | Potri.005G227100.1 | 6.1719  | 20.9599  | -1.7638 | Down | 5.64E-42  | 4.63E-41  |
| Unigene5811   | Potri.003G199200.2 | 42.9718 | 145.926  | -1.7638 | Down | 1.24E-74  | 1.87E-73  |
| Unigene43886  | Potri.019G043300.1 | 36.7842 | 124.9281 | -1.7639 | Down | 4.23E-168 | 1.76E-166 |
| Unigene7772   | Potri.014G066000.4 | 4.3588  | 14.8051  | -1.7641 | Down | 6.07E-40  | 4.75E-39  |
| Unigene18782  | Potri.006G200300.2 | 5.8637  | 19.9171  | -1.7641 | Down | 1.14E-22  | 5.53E-22  |
| Unigene43466  | Potri.005G001500.1 | 5.6335  | 19.1381  | -1.7643 | Down | 6.54E-38  | 4.88E-37  |
| Unigene43324  | Potri.002G075800.1 | 6.9905  | 23.7483  | -1.7644 | Down | 1.08E-81  | 1.80E-80  |
| Unigene21335  | Potri.004G113700.1 | 18.5076 | 62.8826  | -1.7645 | Down | 3.77E-286 | 3.15E-284 |
| Unigene119497 | Potri.019G128000.2 | 1.5575  | 5.2921   | -1.7646 | Down | 5.88E-13  | 1.95E-12  |
| Unigene107249 | Potri.016G132000.1 | 2.4245  | 8.238    | -1.7646 | Down | 3.61E-05  | 7.24E-05  |
| Unigene20084  | Potri.016G043900.1 | 2.0634  | 7.011    | -1.7646 | Down | 3.61E-05  | 7.24E-05  |
| Unigene67821  | Potri.010G170900.1 | 1.6272  | 5.5288   | -1.7646 | Down | 3.61E-05  | 7.23E-05  |
| Unigene52697  | Potri.010G034300.1 | 3.3909  | 11.5216  | -1.7646 | Down | 4.32E-09  | 1.17E-08  |
| Unigene105378 | Potri.009G016000.2 | 2.2553  | 7.6632   | -1.7646 | Down | 4.32E-09  | 1.17E-08  |
| Unigene54165  | Potri.008G132100.3 | 2.2553  | 7.6632   | -1.7646 | Down | 3.61E-05  | 7.23E-05  |
| Unigene48705  | Potri.006G160400.3 | 3.3909  | 11.5216  | -1.7646 | Down | 5.88E-13  | 1.95E-12  |
| Unigene15327  | Potri.003G196500.1 | 1.8722  | 6.3614   | -1.7646 | Down | 3.61E-05  | 7.24E-05  |
| Unigene5292   | Potri.003G194500.1 | 1.8722  | 6.3614   | -1.7646 | Down | 3.61E-05  | 7.24E-05  |
| Unigene20836  | Potri.019G072900.2 | 2.0288  | 6.8937   | -1.7647 | Down | 3.61E-05  | 7.24E-05  |
| Unigene119111 | Potri.007G091600.1 | 1.672   | 5.6814   | -1.7647 | Down | 4.32E-09  | 1.17E-08  |
| Unigene74030  | Potri.005G154900.1 | 75.8192 | 257.636  | -1.7647 | Down | 1.14E-128 | 3.35E-127 |
| Unigene8779   | Potri.003G202100.1 | 16.2172 | 55.1157  | -1.7649 | Down | 7.63E-34  | 5.13E-33  |
| Unigene49927  | Potri.010G232400.1 | 4.9462  | 16.8103  | -1.765  | Down | 3.30E-62  | 4.08E-61  |
| Unigene50266  | Potri.001G394600.2 | 5.895   | 20.0349  | -1.765  | Down | 7.63E-34  | 5.14E-33  |
| Unigene44744  | Potri.005G062900.1 | 8.7258  | 29.6589  | -1.7651 | Down | 3.20E-43  | 2.70E-42  |
| Unigene41667  | Potri.004G214000.3 | 5.1224  | 17.411   | -1.7651 | Down | 2.09E-22  | 1.00E-21  |
| Unigene92373  | Potri.001G239200.1 | 35.1659 | 119.534  | -1.7652 | Down | 1.13E-131 | 3.42E-130 |
| Unigene11811  | Potri.007G016200.1 | 12.5285 | 42.5889  | -1.7653 | Down | 9.67E-66  | 1.27E-64  |
| Unigene150    | Potri.003G110300.4 | 7.5431  | 25.6428  | -1.7653 | Down | 2.76E-118 | 7.31E-117 |
| Unigene8044   | Potri.011G157500.3 | 15.7147 | 53.4266  | -1.7654 | Down | 7.38E-77  | 1.16E-75  |

|               |                    |         |          |         |      |           |           |
|---------------|--------------------|---------|----------|---------|------|-----------|-----------|
| Unigene85746  | Potri.013G042800.1 | 35.8992 | 122.0643 | -1.7656 | Down | 3.52E-84  | 6.11E-83  |
| Unigene89406  | Potri.010G015200.3 | 14.8148 | 50.373   | -1.7656 | Down | 5.85E-43  | 4.91E-42  |
| Unigene12876  | Potri.005G245400.1 | 10.1577 | 34.5369  | -1.7656 | Down | 4.01E-56  | 4.44E-55  |
| Unigene8795   | Potri.011G143100.1 | 35.502  | 120.717  | -1.7657 | Down | 3.15E-140 | 1.03E-138 |
| Unigene118520 | Potri.003G151500.2 | 2.6524  | 9.0193   | -1.7657 | Down | 6.78E-11  | 2.04E-10  |
| Unigene100148 | Potri.002G057800.1 | 3.1164  | 10.5971  | -1.7657 | Down | 2.30E-20  | 1.04E-19  |
| Unigene1058   | Potri.019G050500.8 | 11.1556 | 37.9363  | -1.7658 | Down | 4.69E-97  | 9.66E-96  |
| Unigene71376  | Potri.005G254000.1 | 15.2506 | 51.8646  | -1.7659 | Down | 5.83E-26  | 3.14E-25  |
| Unigene21076  | Potri.010G119300.1 | 1.8451  | 6.2753   | -1.766  | Down | 1.55E-16  | 6.05E-16  |
| Unigene43781  | Potri.010G098200.2 | 10.9016 | 37.0791  | -1.7661 | Down | 4.00E-37  | 2.93E-36  |
| Unigene10685  | Potri.007G100000.1 | 12.6855 | 43.1494  | -1.7662 | Down | 1.67E-202 | 8.79E-201 |
| Unigene21955  | Potri.001G209800.1 | 11.1711 | 38.0043  | -1.7664 | Down | 5.94E-89  | 1.10E-87  |
| Unigene6232   | Potri.001G035100.1 | 1.4146  | 4.8126   | -1.7664 | Down | 5.25E-07  | 1.24E-06  |
| Unigene59980  | Potri.011G144300.1 | 6.3276  | 21.5278  | -1.7665 | Down | 2.56E-18  | 1.07E-17  |
| Unigene19054  | Potri.006G080200.1 | 2.2642  | 7.7032   | -1.7665 | Down | 1.08E-12  | 3.56E-12  |
| Unigene7456   | Potri.002G232100.5 | 4.4854  | 15.2602  | -1.7665 | Down | 1.64E-29  | 9.84E-29  |
| Unigene38757  | Potri.002G028800.1 | 4.0886  | 13.9103  | -1.7665 | Down | 2.56E-18  | 1.07E-17  |
| Unigene113187 | Potri.001G253400.1 | 2.8235  | 9.606    | -1.7665 | Down | 5.25E-07  | 1.24E-06  |
| Unigene83899  | Potri.014G025400.1 | 83.3114 | 283.4964 | -1.7667 | Down | 9.00E-181 | 4.13E-179 |
| Unigene10735  | Potri.011G071900.1 | 5.4598  | 18.5784  | -1.7667 | Down | 2.77E-31  | 1.74E-30  |
| Unigene42814  | Potri.003G148700.2 | 3.3848  | 11.5176  | -1.7667 | Down | 2.77E-31  | 1.74E-30  |
| Unigene70334  | Potri.016G132300.2 | 4.2957  | 14.6179  | -1.7668 | Down | 8.98E-50  | 8.72E-49  |
| Unigene31504  | Potri.002G163000.1 | 6.4204  | 21.8493  | -1.7669 | Down | 4.23E-20  | 1.89E-19  |
| Unigene33416  | Potri.011G045300.1 | 4.9884  | 16.9779  | -1.767  | Down | 1.79E-27  | 1.01E-26  |
| Unigene10606  | Potri.005G076200.3 | 6.6139  | 22.5102  | -1.767  | Down | 5.84E-92  | 1.12E-90  |
| Unigene39266  | Potri.010G098800.2 | 8.7143  | 29.6605  | -1.7671 | Down | 9.62E-48  | 8.98E-47  |
| Unigene115465 | Potri.012G110500.1 | 8.8747  | 30.2082  | -1.7672 | Down | 7.02E-22  | 3.32E-21  |
| Unigene13942  | Potri.006G036500.1 | 8.1865  | 27.8687  | -1.7673 | Down | 2.80E-51  | 2.80E-50  |
| Unigene64190  | Potri.016G127500.1 | 3.2266  | 10.9849  | -1.7674 | Down | 2.86E-16  | 1.10E-15  |
| Unigene1754   | Potri.016G089700.1 | 2.1787  | 7.4174   | -1.7674 | Down | 2.86E-16  | 1.10E-15  |
| Unigene87837  | Potri.014G023200.3 | 2.8959  | 9.8591   | -1.7674 | Down | 8.00E-09  | 2.13E-08  |
| Unigene51071  | Potri.003G212500.1 | 1.562   | 5.3176   | -1.7674 | Down | 8.00E-09  | 2.13E-08  |
| Unigene29530  | Potri.003G198700.1 | 4.4194  | 15.0456  | -1.7674 | Down | 1.17E-23  | 5.86E-23  |
| Unigene46752  | Potri.001G109500.1 | 11.2801 | 38.4028  | -1.7674 | Down | 1.17E-23  | 5.86E-23  |
| Unigene7318   | Potri.006G240500.6 | 1.6954  | 5.7721   | -1.7675 | Down | 8.00E-09  | 2.13E-08  |
| Unigene31103  | Potri.015G146500.1 | 10.4855 | 35.701   | -1.7676 | Down | 3.84E-40  | 3.02E-39  |
| Unigene49961  | Potri.002G151200.1 | 7.7071  | 26.2418  | -1.7676 | Down | 8.54E-33  | 5.60E-32  |
| Unigene11772  | Potri.017G114400.1 | 7.393   | 25.1731  | -1.7677 | Down | 5.28E-73  | 7.78E-72  |
| Unigene7576   | Potri.015G140100.1 | 3.5403  | 12.0556  | -1.7678 | Down | 4.69E-18  | 1.94E-17  |

|               |                    |         |          |         |      |           |           |
|---------------|--------------------|---------|----------|---------|------|-----------|-----------|
| Unigene9334   | Potri.015G010400.1 | 11.7677 | 40.072   | -1.7678 | Down | 1.44E-34  | 9.88E-34  |
| Unigene813    | Potri.010G002600.1 | 7.0806  | 24.1111  | -1.7678 | Down | 5.11E-51  | 5.09E-50  |
| Unigene23875  | Potri.010G041200.1 | 5.2494  | 17.8775  | -1.7679 | Down | 1.49E-54  | 1.59E-53  |
| Unigene11795  | Potri.014G160500.1 | 15.0726 | 51.3353  | -1.768  | Down | 2.04E-65  | 2.67E-64  |
| Unigene117992 | Potri.005G037600.1 | 2.9052  | 9.8948   | -1.768  | Down | 1.25E-10  | 3.70E-10  |
| Unigene50951  | Potri.002G076700.4 | 4.3145  | 14.6946  | -1.768  | Down | 1.25E-10  | 3.70E-10  |
| Unigene39776  | Potri.001G403700.4 | 2.3502  | 8.0044   | -1.768  | Down | 1.25E-10  | 3.70E-10  |
| Unigene29571  | Potri.003G170600.2 | 12.2889 | 41.8635  | -1.7683 | Down | 2.02E-43  | 1.72E-42  |
| Unigene26781  | Potri.019G070300.1 | 3.5846  | 12.2121  | -1.7684 | Down | 2.00E-12  | 6.47E-12  |
| Unigene8332   | Potri.015G012800.4 | 3.8712  | 13.1884  | -1.7684 | Down | 2.14E-23  | 1.07E-22  |
| Unigene47339  | Potri.009G011400.1 | 9.9215  | 33.8006  | -1.7684 | Down | 2.53E-110 | 6.15E-109 |
| Unigene30380  | Potri.003G085800.1 | 22.8113 | 77.7135  | -1.7684 | Down | 3.44E-45  | 3.03E-44  |
| Unigene11761  | Potri.001G198000.1 | 2.3214  | 7.9086   | -1.7684 | Down | 2.14E-23  | 1.07E-22  |
| Unigene39742  | Potri.T153300.1    | 6.5428  | 22.2916  | -1.7685 | Down | 4.46E-36  | 3.19E-35  |
| Unigene85020  | Potri.006G060800.1 | 53.3226 | 181.6824 | -1.7686 | Down | 6.63E-121 | 1.81E-119 |
| Unigene36974  | Potri.002G032100.2 | 7.5928  | 25.8699  | -1.7686 | Down | 3.58E-25  | 1.88E-24  |
| Unigene91339  | Potri.013G028300.1 | 39.0928 | 133.2101 | -1.7687 | Down | 1.01E-129 | 2.99E-128 |
| Unigene93795  | Potri.011G006700.5 | 2.4828  | 8.46     | -1.7687 | Down | 3.22E-14  | 1.14E-13  |
| Unigene20160  | Potri.008G118600.1 | 3.4566  | 11.7784  | -1.7687 | Down | 3.22E-14  | 1.14E-13  |
| Unigene78023  | Potri.005G188400.1 | 20.5626 | 70.0665  | -1.7687 | Down | 1.28E-39  | 9.97E-39  |
| Unigene19185  | Potri.004G022600.1 | 10.9108 | 37.1781  | -1.7687 | Down | 6.00E-27  | 3.33E-26  |
| Unigene43619  | Potri.002G195800.1 | 4.223   | 14.3896  | -1.7687 | Down | 6.79E-65  | 8.80E-64  |
| Unigene23404  | Potri.001G448800.2 | 9.2001  | 31.3491  | -1.7687 | Down | 1.28E-39  | 9.97E-39  |
| Unigene108866 | Potri.014G147700.2 | 32.6815 | 111.3704 | -1.7688 | Down | 8.47E-56  | 9.31E-55  |
| Unigene4160   | Potri.006G259500.1 | 7.0026  | 23.8648  | -1.7689 | Down | 5.25E-16  | 2.00E-15  |
| Unigene5833   | Potri.004G015100.1 | 20.848  | 71.0499  | -1.7689 | Down | 6.29E-45  | 5.51E-44  |
| Unigene2807   | Potri.002G137400.1 | 8.9052  | 30.3552  | -1.7692 | Down | 1.38E-37  | 1.02E-36  |
| Unigene22358  | Potri.008G192200.3 | 37.2995 | 127.1509 | -1.7693 | Down | 1.20E-155 | 4.52E-154 |
| Unigene25668  | Potri.005G001300.1 | 35.4075 | 120.7012 | -1.7693 | Down | 9.26E-79  | 1.49E-77  |
| Unigene29968  | Potri.006G010100.2 | 7.964   | 27.1522  | -1.7695 | Down | 6.56E-25  | 3.42E-24  |
| Unigene30958  | Potri.017G041700.6 | 7.2884  | 24.8502  | -1.7696 | Down | 1.10E-26  | 6.05E-26  |
| Unigene10721  | Potri.017G152700.1 | 5.4571  | 18.6072  | -1.7697 | Down | 2.76E-112 | 6.84E-111 |
| Unigene47952  | Potri.008G068800.1 | 8.161   | 27.8275  | -1.7697 | Down | 2.53E-87  | 4.57E-86  |
| Unigene7029   | Potri.008G041300.2 | 27.0021 | 92.0808  | -1.7698 | Down | 3.56E-71  | 5.09E-70  |
| Unigene13795  | Potri.001G275900.1 | 4.3063  | 14.6857  | -1.7699 | Down | 7.27E-41  | 5.82E-40  |
| Unigene82189  | Potri.002G229200.2 | 73.591  | 251.0412 | -1.7703 | Down | 4.65E-152 | 1.70E-150 |
| Unigene51352  | Potri.T092400.1    | 1.0173  | 3.4705   | -1.7704 | Down | 6.80E-05  | 1.33E-04  |
| Unigene97074  | Potri.015G038200.1 | 0.9544  | 3.2559   | -1.7704 | Down | 6.80E-05  | 1.33E-04  |
| Unigene112416 | Potri.014G195000.1 | 1.8496  | 6.3101   | -1.7704 | Down | 6.80E-05  | 1.33E-04  |

|               |                    |         |          |         |      |           |           |
|---------------|--------------------|---------|----------|---------|------|-----------|-----------|
| Unigene35246  | Potri.010G062700.6 | 1.8445  | 6.2927   | -1.7704 | Down | 9.79E-07  | 2.25E-06  |
| Unigene28157  | Potri.008G010400.6 | 1.6912  | 5.7697   | -1.7704 | Down | 9.79E-07  | 2.25E-06  |
| Unigene15928  | Potri.006G159200.1 | 0.8988  | 3.0663   | -1.7704 | Down | 6.80E-05  | 1.33E-04  |
| Unigene117653 | Potri.001G262400.4 | 1.1968  | 4.083    | -1.7704 | Down | 6.80E-05  | 1.33E-04  |
| Unigene24315  | Potri.019G080000.1 | 1.1536  | 3.9357   | -1.7705 | Down | 6.80E-05  | 1.33E-04  |
| Unigene28527  | Potri.012G023200.5 | 7.7658  | 26.4943  | -1.7705 | Down | 4.32E-21  | 1.99E-20  |
| Unigene15714  | Potri.011G071700.1 | 1.8344  | 6.2584   | -1.7705 | Down | 6.80E-05  | 1.33E-04  |
| Unigene18389  | Potri.010G002800.3 | 3.5523  | 12.1193  | -1.7705 | Down | 9.56E-32  | 6.09E-31  |
| Unigene40819  | Potri.009G144800.2 | 2.3151  | 7.8985   | -1.7705 | Down | 9.79E-07  | 2.25E-06  |
| Unigene55093  | Potri.009G120900.2 | 2.1314  | 7.2716   | -1.7705 | Down | 3.68E-12  | 1.18E-11  |
| Unigene20536  | Potri.008G143600.2 | 1.2899  | 4.4007   | -1.7705 | Down | 6.80E-05  | 1.33E-04  |
| Unigene59139  | Potri.006G264500.1 | 2.0722  | 7.0696   | -1.7705 | Down | 6.80E-05  | 1.33E-04  |
| Unigene26352  | Potri.006G043900.1 | 1.3203  | 4.5045   | -1.7705 | Down | 6.80E-05  | 1.33E-04  |
| Unigene38305  | Potri.005G258300.1 | 1.1134  | 3.7986   | -1.7705 | Down | 6.80E-05  | 1.33E-04  |
| Unigene17526  | Potri.004G122300.1 | 1.5792  | 5.3877   | -1.7705 | Down | 5.93E-14  | 2.06E-13  |
| Unigene53123  | Potri.003G139600.2 | 2.9577  | 10.0906  | -1.7705 | Down | 9.79E-07  | 2.25E-06  |
| Unigene109999 | Potri.002G111500.1 | 3.0657  | 10.4592  | -1.7705 | Down | 9.79E-07  | 2.25E-06  |
| Unigene55942  | Potri.002G061000.2 | 4.6049  | 15.7103  | -1.7705 | Down | 2.31E-10  | 6.74E-10  |
| Unigene6995   | Potri.002G038800.3 | 1.977   | 6.7449   | -1.7705 | Down | 2.31E-10  | 6.74E-10  |
| Unigene30348  | Potri.001G345200.2 | 5.7649  | 19.6679  | -1.7705 | Down | 1.19E-70  | 1.68E-69  |
| Unigene23753  | Potri.012G104300.1 | 14.5572 | 49.6734  | -1.7707 | Down | 1.63E-84  | 2.84E-83  |
| Unigene10167  | Potri.001G301600.6 | 23.2203 | 79.2384  | -1.7708 | Down | 7.36E-67  | 9.87E-66  |
| Unigene21909  | Potri.007G117200.1 | 42.6394 | 145.5275 | -1.771  | Down | 0         | 0         |
| Unigene22055  | Potri.001G460500.1 | 4.5971  | 15.6914  | -1.7712 | Down | 1.34E-66  | 1.79E-65  |
| Unigene20447  | Potri.008G129600.1 | 8.7493  | 29.866   | -1.7713 | Down | 1.04E-29  | 6.25E-29  |
| Unigene81356  | Potri.004G234600.1 | 40.0897 | 136.8512 | -1.7713 | Down | 3.15E-82  | 5.32E-81  |
| Unigene77951  | Potri.007G015300.1 | 12.2738 | 41.9025  | -1.7715 | Down | 2.20E-24  | 1.13E-23  |
| Unigene10870  | Potri.018G085100.2 | 11.6225 | 39.6888  | -1.7718 | Down | 1.31E-135 | 4.13E-134 |
| Unigene17041  | Potri.016G059700.2 | 12.9024 | 44.0605  | -1.7718 | Down | 1.97E-50  | 1.94E-49  |
| Unigene25653  | Potri.015G056400.1 | 8.0689  | 27.5556  | -1.7719 | Down | 2.91E-17  | 1.17E-16  |
| Unigene54037  | Potri.008G170400.2 | 25.5903 | 87.3901  | -1.7719 | Down | 1.05E-81  | 1.76E-80  |
| Unigene50664  | Potri.008G117100.1 | 13.3618 | 45.6322  | -1.7719 | Down | 3.56E-78  | 5.68E-77  |
| Unigene9257   | Potri.006G143000.2 | 7.1886  | 24.5495  | -1.7719 | Down | 2.91E-17  | 1.17E-16  |
| Unigene88360  | Potri.004G229300.1 | 23.8178 | 81.3387  | -1.7719 | Down | 2.61E-64  | 3.35E-63  |
| Unigene13976  | Potri.T034300.1    | 5.4247  | 18.5264  | -1.772  | Down | 6.77E-47  | 6.20E-46  |
| Unigene22365  | Potri.014G180100.1 | 15.546  | 53.0956  | -1.772  | Down | 9.70E-87  | 1.74E-85  |
| Unigene18660  | Potri.009G167000.1 | 9.8674  | 33.7009  | -1.772  | Down | 7.05E-73  | 1.04E-71  |
| Unigene28488  | Potri.014G157000.2 | 9.4456  | 32.2638  | -1.7722 | Down | 1.05E-53  | 1.10E-52  |
| Unigene22731  | Potri.009G138800.1 | 4.8058  | 16.4153  | -1.7722 | Down | 1.13E-27  | 6.41E-27  |

|               |                     |         |          |         |      |           |           |
|---------------|---------------------|---------|----------|---------|------|-----------|-----------|
| Unigene5508   | Potri.014G058800.1  | 18.6498 | 63.7083  | -1.7723 | Down | 4.78E-38  | 3.58E-37  |
| Unigene16876  | Potri.003G032300.3  | 19.358  | 66.1276  | -1.7723 | Down | 3.59E-50  | 3.52E-49  |
| Unigene40262  | Potri.014G089400.1  | 5.3877  | 18.4058  | -1.7724 | Down | 2.82E-36  | 2.02E-35  |
| Unigene56292  | Potri.008G021600.1  | 4.3719  | 14.9353  | -1.7724 | Down | 2.11E-48  | 1.99E-47  |
| Unigene11599  | Potri.006G108700.2  | 17.7778 | 60.7324  | -1.7724 | Down | 4.85E-95  | 9.71E-94  |
| Unigene88316  | Potri.006G034700.3  | 67.2744 | 229.8205 | -1.7724 | Down | 7.46E-178 | 3.34E-176 |
| Unigene32082  | Potri.001G288200.1  | 5.8466  | 19.9747  | -1.7725 | Down | 5.57E-57  | 6.26E-56  |
| Unigene3363   | Potri.001G262600.1  | 10.8366 | 37.0246  | -1.7726 | Down | 3.26E-55  | 3.54E-54  |
| Unigene116834 | Potri.005G007200.1  | 3.9086  | 13.355   | -1.7727 | Down | 6.79E-12  | 2.14E-11  |
| Unigene9185   | Potri.019G050100.3  | 5.167   | 17.6571  | -1.7728 | Down | 1.45E-20  | 6.59E-20  |
| Unigene26465  | Potri.018G026900.1  | 11.7595 | 40.1852  | -1.7728 | Down | 1.45E-20  | 6.59E-20  |
| Unigene18643  | Potri.004G131800.2  | 6.5241  | 22.2936  | -1.7728 | Down | 5.85E-31  | 3.65E-30  |
| Unigene43399  | Potri.014G115200.1  | 10.6134 | 36.2763  | -1.7731 | Down | 2.94E-94  | 5.83E-93  |
| Unigene6752   | Potri.010G153300.1  | 1.7279  | 5.9058   | -1.7731 | Down | 4.28E-10  | 1.23E-09  |
| Unigene8380   | Potri.006G264000.1  | 2.0218  | 6.9104   | -1.7731 | Down | 4.28E-10  | 1.23E-09  |
| Unigene39203  | Potri.004G050900.1  | 15.9721 | 54.6094  | -1.7736 | Down | 2.69E-102 | 5.92E-101 |
| Unigene47386  | Potri.002G178100.1  | 23.7281 | 81.1251  | -1.7736 | Down | 6.64E-82  | 1.12E-80  |
| Unigene89960  | Potri.001G341100.2  | 59.4367 | 203.213  | -1.7736 | Down | 1.65E-175 | 7.26E-174 |
| Unigene47495  | Potri.014G058800.1  | 1.791   | 6.1243   | -1.7738 | Down | 2.75E-08  | 7.08E-08  |
| Unigene39113  | Potri.010G027800.10 | 2.6076  | 8.9165   | -1.7738 | Down | 2.75E-08  | 7.08E-08  |
| Unigene97448  | Potri.005G107600.2  | 0.965   | 3.2998   | -1.7738 | Down | 2.75E-08  | 7.08E-08  |
| Unigene105902 | Potri.002G117500.1  | 1.1882  | 4.063    | -1.7738 | Down | 2.75E-08  | 7.08E-08  |
| Unigene44831  | Potri.017G071600.1  | 2.8159  | 9.631    | -1.7741 | Down | 4.95E-39  | 3.79E-38  |
| Unigene32199  | Potri.011G136700.3  | 1.9356  | 6.6203   | -1.7741 | Down | 2.67E-20  | 1.20E-19  |
| Unigene570    | Potri.008G226100.1  | 9.3814  | 32.0873  | -1.7741 | Down | 6.81E-51  | 6.77E-50  |
| Unigene192    | Potri.002G192900.7  | 16.3824 | 56.0304  | -1.7741 | Down | 2.14E-120 | 5.80E-119 |
| Unigene2085   | Potri.001G032500.1  | 20.5678 | 70.3461  | -1.7741 | Down | 2.39E-76  | 3.72E-75  |
| Unigene28634  | Potri.018G035500.1  | 2.458   | 8.4078   | -1.7742 | Down | 2.01E-13  | 6.83E-13  |
| Unigene50333  | Potri.016G129000.1  | 4.1161  | 14.0808  | -1.7744 | Down | 1.96E-30  | 1.20E-29  |
| Unigene88169  | Potri.014G000600.1  | 23.9945 | 82.0856  | -1.7744 | Down | 3.02E-64  | 3.86E-63  |
| Unigene12274  | Potri.001G234800.1  | 12.8598 | 43.9936  | -1.7744 | Down | 3.02E-64  | 3.86E-63  |
| Unigene6706   | Potri.014G022800.1  | 4.7246  | 16.1634  | -1.7745 | Down | 1.61E-18  | 6.79E-18  |
| Unigene79491  | Potri.012G114200.1  | 43.9272 | 150.2794 | -1.7745 | Down | 3.72E-86  | 6.65E-85  |
| Unigene28208  | Potri.008G120900.1  | 7.0869  | 24.2451  | -1.7745 | Down | 1.61E-18  | 6.79E-18  |
| Unigene86578  | Potri.004G233800.1  | 7.0167  | 24.005   | -1.7745 | Down | 1.61E-18  | 6.79E-18  |
| Unigene1552   | Potri.004G141100.1  | 3.0944  | 10.5869  | -1.7745 | Down | 1.35E-23  | 6.76E-23  |
| Unigene52652  | Potri.016G116200.3  | 24.8664 | 85.0808  | -1.7746 | Down | 1.13E-55  | 1.24E-54  |
| Unigene76600  | Potri.009G032700.1  | 24.3186 | 83.2028  | -1.7746 | Down | 1.38E-45  | 1.22E-44  |
| Unigene45419  | Potri.001G253200.1  | 5.0109  | 17.1462  | -1.7747 | Down | 8.09E-44  | 6.92E-43  |

|               |                    |         |          |         |      |           |           |
|---------------|--------------------|---------|----------|---------|------|-----------|-----------|
| Unigene37354  | Potri.012G020000.1 | 9.4995  | 32.5094  | -1.7749 | Down | 4.76E-42  | 3.92E-41  |
| Unigene102785 | Potri.011G053800.1 | 1.7912  | 6.1299   | -1.7749 | Down | 1.25E-11  | 3.90E-11  |
| Unigene15360  | Potri.008G078500.3 | 12.9937 | 44.4672  | -1.7749 | Down | 6.93E-27  | 3.84E-26  |
| Unigene41737  | Potri.007G105100.1 | 2.5063  | 8.5771   | -1.7749 | Down | 1.25E-11  | 3.90E-11  |
| Unigene94579  | Potri.005G247700.1 | 1.1808  | 4.041    | -1.7749 | Down | 1.83E-06  | 4.12E-06  |
| Unigene12432  | Potri.012G060000.1 | 1.1852  | 4.0561   | -1.775  | Down | 1.83E-06  | 4.12E-06  |
| Unigene4761   | Potri.010G034800.3 | 1.5541  | 5.3186   | -1.775  | Down | 1.83E-06  | 4.12E-06  |
| Unigene23081  | Potri.001G068300.3 | 4.6114  | 15.7848  | -1.7753 | Down | 4.14E-25  | 2.17E-24  |
| Unigene1719   | Potri.016G029200.1 | 4.3882  | 15.0218  | -1.7754 | Down | 4.89E-20  | 2.18E-19  |
| Unigene2536   | Potri.005G229400.1 | 7.2722  | 24.8946  | -1.7754 | Down | 4.89E-20  | 2.18E-19  |
| Unigene80583  | Potri.006G005500.1 | 33.7044 | 115.3913 | -1.7755 | Down | 1.68E-68  | 2.31E-67  |
| Unigene3843   | Potri.001G399400.3 | 39.9348 | 136.7171 | -1.7755 | Down | 1.43E-118 | 3.81E-117 |
| Unigene43144  | Potri.001G377800.1 | 14.3731 | 49.2103  | -1.7756 | Down | 1.91E-98  | 4.02E-97  |
| Unigene15745  | Potri.014G062000.1 | 27.4917 | 94.139   | -1.7758 | Down | 1.17E-56  | 1.31E-55  |
| Unigene42898  | Potri.010G244700.1 | 9.8734  | 33.8113  | -1.7759 | Down | 3.15E-151 | 1.14E-149 |
| Unigene31244  | Potri.006G092800.1 | 16.1088 | 55.1643  | -1.7759 | Down | 1.29E-51  | 1.30E-50  |
| Unigene45521  | Potri.016G075700.2 | 4.8432  | 16.5881  | -1.7761 | Down | 1.49E-21  | 6.98E-21  |
| Unigene46998  | Potri.009G080800.3 | 7.6894  | 26.3368  | -1.7761 | Down | 1.49E-21  | 6.98E-21  |
| Unigene24479  | Potri.008G127900.1 | 16.5501 | 56.6851  | -1.7761 | Down | 1.95E-61  | 2.38E-60  |
| Unigene13420  | Potri.017G098500.2 | 4.3592  | 14.931   | -1.7762 | Down | 3.41E-33  | 2.26E-32  |
| Unigene18495  | Potri.002G181600.1 | 6.3058  | 21.5987  | -1.7762 | Down | 1.04E-64  | 1.35E-63  |
| Unigene21883  | Potri.012G137200.1 | 20.6621 | 70.7765  | -1.7763 | Down | 3.61E-195 | 1.82E-193 |
| Unigene41129  | Potri.011G156900.1 | 7.31    | 25.04    | -1.7763 | Down | 1.78E-36  | 1.28E-35  |
| Unigene112826 | Potri.011G028400.4 | 17.6682 | 60.5218  | -1.7763 | Down | 1.78E-36  | 1.28E-35  |
| Unigene3572   | Potri.010G254600.1 | 5.7046  | 19.541   | -1.7763 | Down | 3.70E-13  | 1.24E-12  |
| Unigene56769  | Potri.002G145900.1 | 3.8484  | 13.1824  | -1.7763 | Down | 3.70E-13  | 1.24E-12  |
| Unigene58263  | Potri.015G010400.1 | 12.7738 | 43.7633  | -1.7765 | Down | 2.02E-31  | 1.28E-30  |
| Unigene36463  | Potri.001G376400.5 | 14.9468 | 51.2107  | -1.7766 | Down | 1.05E-34  | 7.24E-34  |
| Unigene22806  | Potri.013G029200.1 | 7.4113  | 25.3939  | -1.7767 | Down | 5.52E-38  | 4.13E-37  |
| Unigene43059  | Potri.010G057200.3 | 5.116   | 17.5309  | -1.7768 | Down | 3.19E-69  | 4.43E-68  |
| Unigene29031  | Potri.006G210900.1 | 6.3566  | 21.7821  | -1.7768 | Down | 3.19E-69  | 4.43E-68  |
| Unigene22384  | Potri.003G111100.1 | 2.3893  | 8.1872   | -1.7768 | Down | 4.54E-23  | 2.23E-22  |
| Unigene70886  | Potri.018G052200.1 | 17.4436 | 59.778   | -1.7769 | Down | 1.20E-29  | 7.21E-29  |
| Unigene33334  | Potri.018G017200.1 | 5.3515  | 18.3386  | -1.7769 | Down | 4.30E-51  | 4.29E-50  |
| Unigene16670  | Potri.004G197400.1 | 65.0202 | 222.8168 | -1.7769 | Down | 7.72E-135 | 2.41E-133 |
| Unigene18244  | Potri.003G056500.6 | 11.0369 | 37.8214  | -1.7769 | Down | 4.30E-51  | 4.29E-50  |
| Unigene919    | Potri.001G130100.1 | 9.6776  | 33.1634  | -1.7769 | Down | 1.12E-103 | 2.50E-102 |
| Unigene36266  | Potri.008G041900.1 | 46.6449 | 159.8576 | -1.777  | Down | 9.36E-171 | 3.97E-169 |
| Unigene3280   | Potri.005G247400.1 | 8.8922  | 30.4765  | -1.7771 | Down | 4.76E-46  | 4.28E-45  |



|               |                    |         |          |         |      |           |           |
|---------------|--------------------|---------|----------|---------|------|-----------|-----------|
| Unigene72185  | Potri.001G341100.3 | 28.9705 | 99.2926  | -1.7771 | Down | 2.52E-49  | 2.43E-48  |
| Unigene109112 | Potri.013G082200.1 | 1.9354  | 6.6343   | -1.7773 | Down | 1.28E-04  | 2.44E-04  |
| Unigene20897  | Potri.008G217000.1 | 1.1723  | 4.0185   | -1.7773 | Down | 1.28E-04  | 2.44E-04  |
| Unigene38806  | Potri.007G087200.4 | 4.6101  | 15.8032  | -1.7773 | Down | 1.10E-14  | 3.97E-14  |
| Unigene31432  | Potri.006G211800.1 | 1.1997  | 4.1125   | -1.7773 | Down | 1.28E-04  | 2.44E-04  |
| Unigene37750  | Potri.003G012400.3 | 1.0467  | 3.588    | -1.7773 | Down | 1.28E-04  | 2.44E-04  |
| Unigene42493  | Potri.002G238100.1 | 13.4092 | 45.9639  | -1.7773 | Down | 2.22E-147 | 7.80E-146 |
| Unigene46137  | Potri.019G028700.1 | 1.1756  | 4.03     | -1.7774 | Down | 1.28E-04  | 2.44E-04  |
| Unigene106674 | Potri.010G224100.1 | 1.2605  | 4.321    | -1.7774 | Down | 5.11E-08  | 1.29E-07  |
| Unigene47424  | Potri.007G052000.1 | 24.3554 | 83.4898  | -1.7774 | Down | 2.80E-44  | 2.41E-43  |
| Unigene1212   | Potri.005G227700.1 | 7.1891  | 24.6442  | -1.7774 | Down | 1.48E-47  | 1.38E-46  |
| Unigene16762  | Potri.005G083900.3 | 1.1756  | 4.03     | -1.7774 | Down | 1.28E-04  | 2.44E-04  |
| Unigene19277  | Potri.002G013100.2 | 1.0912  | 3.7406   | -1.7774 | Down | 1.28E-04  | 2.44E-04  |
| Unigene52832  | Potri.014G029700.5 | 12.2143 | 41.8832  | -1.7778 | Down | 2.19E-29  | 1.31E-28  |
| Unigene174    | Potri.013G025200.1 | 5.8846  | 20.1789  | -1.7778 | Down | 1.25E-154 | 4.65E-153 |
| Unigene108848 | Potri.006G102200.1 | 10.657  | 36.5494  | -1.778  | Down | 1.65E-19  | 7.19E-19  |
| Unigene37486  | Potri.009G036900.1 | 14.7393 | 50.5556  | -1.7782 | Down | 6.76E-31  | 4.21E-30  |
| Unigene43772  | Potri.004G139900.2 | 2.8602  | 9.8105   | -1.7782 | Down | 3.31E-16  | 1.27E-15  |
| Unigene11405  | Potri.001G218400.1 | 9.2246  | 31.6392  | -1.7782 | Down | 2.11E-63  | 2.67E-62  |
| Unigene5556   | Potri.019G041300.1 | 4.7721  | 16.3696  | -1.7783 | Down | 1.31E-27  | 7.40E-27  |
| Unigene35067  | Potri.010G202600.1 | 2.1407  | 7.3433   | -1.7783 | Down | 5.71E-39  | 4.37E-38  |
| Unigene76128  | Potri.008G171400.2 | 22.6462 | 77.6794  | -1.7783 | Down | 3.01E-42  | 2.49E-41  |
| Unigene825    | Potri.012G075000.1 | 7.6754  | 26.3307  | -1.7784 | Down | 1.60E-137 | 5.14E-136 |
| Unigene81006  | Potri.005G107600.2 | 16.8736 | 57.8858  | -1.7784 | Down | 1.09E-35  | 7.69E-35  |
| Unigene26076  | Potri.001G276700.2 | 10.7377 | 36.8364  | -1.7784 | Down | 2.54E-24  | 1.30E-23  |
| Unigene10922  | Potri.008G071300.2 | 3.9073  | 13.4043  | -1.7785 | Down | 4.94E-47  | 4.54E-46  |
| Unigene13020  | Potri.003G202100.1 | 5.1658  | 17.7237  | -1.7786 | Down | 7.22E-60  | 8.57E-59  |
| Unigene18424  | Potri.001G096100.1 | 4.6624  | 15.9961  | -1.7786 | Down | 2.09E-32  | 1.35E-31  |
| Unigene7662   | Potri.009G005900.1 | 9.5372  | 32.7253  | -1.7788 | Down | 2.90E-45  | 2.56E-44  |
| Unigene38440  | Potri.013G042800.2 | 31.5331 | 108.2091 | -1.7789 | Down | 1.81E-130 | 5.41E-129 |
| Unigene21097  | Potri.011G066100.1 | 1.8754  | 6.4356   | -1.7789 | Down | 1.46E-09  | 4.07E-09  |
| Unigene30784  | Potri.009G006200.4 | 2.6364  | 9.0469   | -1.7789 | Down | 1.46E-09  | 4.07E-09  |
| Unigene103639 | Potri.005G120700.1 | 3.1373  | 10.7661  | -1.7789 | Down | 1.46E-09  | 4.07E-09  |
| Unigene31925  | Potri.013G073200.1 | 22.3983 | 76.8659  | -1.779  | Down | 4.74E-217 | 2.72E-215 |
| Unigene45755  | Potri.016G012500.1 | 7.53    | 25.8468  | -1.7793 | Down | 2.03E-14  | 7.21E-14  |
| Unigene62804  | Potri.004G012000.2 | 5.5884  | 19.1825  | -1.7793 | Down | 2.03E-14  | 7.21E-14  |
| Unigene71920  | Potri.017G001100.1 | 10.735  | 36.8528  | -1.7795 | Down | 3.02E-19  | 1.31E-18  |
| Unigene22200  | Potri.007G065200.1 | 4.8198  | 16.5468  | -1.7795 | Down | 1.00E-41  | 8.19E-41  |
| Unigene39997  | Potri.008G061600.1 | 6.149   | 21.1118  | -1.7796 | Down | 7.35E-29  | 4.32E-28  |

|               |                    |         |          |         |      |           |           |
|---------------|--------------------|---------|----------|---------|------|-----------|-----------|
| Unigene114866 | Potri.004G022500.3 | 10.0628 | 34.5477  | -1.7796 | Down | 4.66E-24  | 2.37E-23  |
| Unigene47778  | Potri.012G089300.1 | 38.2456 | 131.3299 | -1.7798 | Down | 3.13E-86  | 5.59E-85  |
| Unigene8925   | Potri.015G036000.2 | 7.7506  | 26.6162  | -1.7799 | Down | 9.17E-21  | 4.18E-20  |
| Unigene12949  | Potri.015G014800.2 | 7.8525  | 26.9664  | -1.7799 | Down | 2.26E-30  | 1.39E-29  |
| Unigene20356  | Potri.013G065000.2 | 3.5261  | 12.109   | -1.7799 | Down | 9.17E-21  | 4.18E-20  |
| Unigene20448  | Potri.010G133000.1 | 1.1411  | 3.9186   | -1.7799 | Down | 3.41E-06  | 7.53E-06  |
| Unigene33908  | Potri.007G041000.1 | 1.9827  | 6.8088   | -1.7799 | Down | 4.26E-11  | 1.29E-10  |
| Unigene10351  | Potri.006G050700.1 | 36.1073 | 123.9961 | -1.7799 | Down | 1.38E-254 | 9.72E-253 |
| Unigene30338  | Potri.005G151500.1 | 2.3872  | 8.1978   | -1.7799 | Down | 3.41E-06  | 7.53E-06  |
| Unigene54326  | Potri.004G166600.1 | 2.2954  | 7.8825   | -1.7799 | Down | 3.41E-06  | 7.53E-06  |
| Unigene16470  | Potri.002G166700.4 | 4.6084  | 15.8258  | -1.7799 | Down | 4.26E-11  | 1.29E-10  |
| Unigene35656  | Potri.004G159000.1 | 1.091   | 3.7467   | -1.78   | Down | 3.41E-06  | 7.53E-06  |
| Unigene93955  | Potri.003G015900.1 | 1.7273  | 5.9318   | -1.78   | Down | 4.26E-11  | 1.29E-10  |
| Unigene36070  | Potri.001G252500.2 | 15.1295 | 51.9664  | -1.7802 | Down | 6.97E-32  | 4.46E-31  |
| Unigene68016  | Potri.007G127800.1 | 2.9788  | 10.2323  | -1.7803 | Down | 2.79E-22  | 1.34E-21  |
| Unigene46748  | Potri.003G146100.1 | 17.8109 | 61.1816  | -1.7803 | Down | 5.69E-43  | 4.78E-42  |
| Unigene39471  | Potri.001G210600.3 | 2.4465  | 8.4038   | -1.7803 | Down | 2.79E-22  | 1.34E-21  |
| Unigene31812  | Potri.005G207700.1 | 13.6336 | 46.8365  | -1.7805 | Down | 2.15E-33  | 1.43E-32  |
| Unigene103634 | Potri.005G144600.1 | 1.0732  | 3.6873   | -1.7806 | Down | 1.26E-12  | 4.11E-12  |
| Unigene977    | Potri.018G038000.1 | 1.5577  | 5.352    | -1.7807 | Down | 1.26E-12  | 4.11E-12  |
| Unigene10649  | Potri.001G054700.2 | 3.627   | 12.4622  | -1.7807 | Down | 8.53E-24  | 4.29E-23  |
| Unigene33938  | Potri.007G144900.1 | 6.2166  | 21.3616  | -1.7808 | Down | 4.14E-30  | 2.52E-29  |
| Unigene484    | Potri.004G092900.4 | 51.8933 | 178.3081 | -1.7808 | Down | 0         | 0         |
| Unigene50625  | Potri.013G061500.2 | 8.6076  | 29.5793  | -1.7809 | Down | 8.79E-54  | 9.27E-53  |
| Unigene93     | Potri.004G066200.1 | 4.9664  | 17.0667  | -1.7809 | Down | 1.86E-88  | 3.42E-87  |
| Unigene50962  | Potri.001G010500.2 | 17.4842 | 60.0846  | -1.7809 | Down | 4.56E-60  | 5.43E-59  |
| Unigene2158   | Potri.013G076900.1 | 9.1907  | 31.5844  | -1.781  | Down | 1.04E-42  | 8.68E-42  |
| Unigene22973  | Potri.008G185600.3 | 18.702  | 64.2738  | -1.781  | Down | 2.74E-55  | 2.98E-54  |
| Unigene37783  | Potri.007G003500.1 | 10.9189 | 37.5234  | -1.781  | Down | 1.04E-42  | 8.68E-42  |
| Unigene13822  | Potri.005G036700.1 | 8.2687  | 28.4158  | -1.781  | Down | 1.04E-42  | 8.68E-42  |
| Unigene327    | Potri.002G213400.2 | 10.1888 | 35.0158  | -1.781  | Down | 6.00E-156 | 2.26E-154 |
| Unigene48293  | Potri.005G138200.1 | 21.6185 | 74.3016  | -1.7811 | Down | 3.23E-44  | 2.78E-43  |
| Unigene12120  | Potri.019G048700.8 | 10.5878 | 36.3921  | -1.7812 | Down | 7.74E-126 | 2.21E-124 |
| Unigene106546 | Potri.010G209200.1 | 1.3254  | 4.5557   | -1.7812 | Down | 9.49E-08  | 2.36E-07  |
| Unigene17783  | Potri.007G129600.2 | 1.3815  | 4.7485   | -1.7812 | Down | 9.49E-08  | 2.35E-07  |
| Unigene48726  | Potri.019G044200.2 | 3.096   | 10.6419  | -1.7813 | Down | 9.49E-08  | 2.35E-07  |
| Unigene35646  | Potri.016G112600.1 | 2.3954  | 8.2337   | -1.7813 | Down | 9.49E-08  | 2.35E-07  |
| Unigene115330 | Potri.010G216900.3 | 10.9169 | 37.5249  | -1.7813 | Down | 8.01E-27  | 4.43E-26  |
| Unigene16282  | Potri.008G198000.1 | 2.0451  | 7.0298   | -1.7813 | Down | 9.49E-08  | 2.35E-07  |

|               |                    |         |          |         |      |           |           |
|---------------|--------------------|---------|----------|---------|------|-----------|-----------|
| Unigene31604  | Potri.002G111300.1 | 36.968  | 127.0746 | -1.7813 | Down | 4.10E-135 | 1.28E-133 |
| Unigene62284  | Potri.002G026700.2 | 3.1584  | 10.8565  | -1.7813 | Down | 9.49E-08  | 2.35E-07  |
| Unigene105470 | Potri.001G129000.1 | 1.8784  | 6.4566   | -1.7813 | Down | 9.49E-08  | 2.36E-07  |
| Unigene32632  | Potri.006G250600.4 | 5.3235  | 18.3003  | -1.7814 | Down | 3.12E-47  | 2.88E-46  |
| Unigene2496   | Potri.T081500.1    | 4.1026  | 14.1036  | -1.7815 | Down | 6.12E-41  | 4.91E-40  |
| Unigene22218  | Potri.008G149800.2 | 6.2688  | 21.5508  | -1.7815 | Down | 1.36E-67  | 1.83E-66  |
| Unigene6973   | Potri.013G031400.1 | 21.3913 | 73.5481  | -1.7817 | Down | 1.15E-84  | 2.01E-83  |
| Unigene18940  | Potri.016G053700.2 | 18.8722 | 64.8988  | -1.7819 | Down | 1.11E-90  | 2.10E-89  |
| Unigene26990  | Potri.006G165300.2 | 4.7272  | 16.2555  | -1.7819 | Down | 1.56E-23  | 7.80E-23  |
| Unigene41913  | Potri.001G392600.2 | 7.2547  | 24.948   | -1.7819 | Down | 2.33E-31  | 1.47E-30  |
| Unigene7659   | Potri.015G112700.1 | 8.2814  | 28.4794  | -1.782  | Down | 3.60E-39  | 2.77E-38  |
| Unigene37443  | Potri.006G011300.1 | 15.3893 | 52.9246  | -1.782  | Down | 9.13E-55  | 9.82E-54  |
| Unigene48867  | Potri.014G054600.1 | 1.8831  | 6.4765   | -1.7821 | Down | 2.71E-09  | 7.43E-09  |
| Unigene79536  | Potri.013G085300.1 | 60.631  | 208.5331 | -1.7821 | Down | 5.02E-120 | 1.35E-118 |
| Unigene4875   | Potri.012G118100.2 | 4.0408  | 13.8974  | -1.7821 | Down | 2.71E-09  | 7.43E-09  |
| Unigene97952  | Potri.010G093400.2 | 0.9957  | 3.4244   | -1.7821 | Down | 2.71E-09  | 7.43E-09  |
| Unigene17144  | Potri.002G202300.1 | 2.7867  | 9.5844   | -1.7821 | Down | 2.71E-09  | 7.43E-09  |
| Unigene27244  | Potri.001G011900.1 | 35.9747 | 123.7397 | -1.7823 | Down | 1.76E-107 | 4.12E-106 |
| Unigene72114  | Potri.013G021600.2 | 37.4806 | 128.9438 | -1.7825 | Down | 8.43E-64  | 1.07E-62  |
| Unigene16880  | Potri.008G102200.4 | 9.9465  | 34.2183  | -1.7825 | Down | 4.50E-28  | 2.58E-27  |
| Unigene5580   | Potri.007G052000.1 | 43.1125 | 148.3199 | -1.7825 | Down | 4.72E-135 | 1.47E-133 |
| Unigene82482  | Potri.001G407800.1 | 98.6587 | 339.4269 | -1.7826 | Down | 3.10E-209 | 1.70E-207 |
| Unigene52851  | Potri.016G132100.1 | 3.5798  | 12.3168  | -1.7827 | Down | 7.87E-11  | 2.35E-10  |
| Unigene52797  | Potri.016G128700.1 | 2.6581  | 9.1456   | -1.7827 | Down | 7.87E-11  | 2.35E-10  |
| Unigene27748  | Potri.004G088600.2 | 6.3532  | 21.859   | -1.7827 | Down | 3.08E-20  | 1.38E-19  |
| Unigene30189  | Potri.006G119700.1 | 9.0929  | 31.2885  | -1.7828 | Down | 4.26E-31  | 2.67E-30  |
| Unigene33502  | Potri.004G094600.1 | 13.479  | 46.382   | -1.7829 | Down | 2.52E-71  | 3.61E-70  |
| Unigene74945  | Potri.016G036900.2 | 77.5078 | 266.7339 | -1.783  | Down | 1.55E-137 | 4.97E-136 |
| Unigene1159   | Potri.006G143300.4 | 33.769  | 116.2149 | -1.783  | Down | 2.84E-245 | 1.91E-243 |
| Unigene39957  | Potri.002G057300.2 | 25.9228 | 89.2129  | -1.783  | Down | 2.04E-97  | 4.22E-96  |
| Unigene13310  | Potri.011G073900.1 | 20.1418 | 69.3195  | -1.7831 | Down | 4.06E-34  | 2.75E-33  |
| Unigene1450   | Potri.006G232100.2 | 1.3843  | 4.7642   | -1.7831 | Down | 2.31E-12  | 7.47E-12  |
| Unigene7448   | Potri.006G224600.1 | 4.2969  | 14.7882  | -1.7831 | Down | 2.86E-23  | 1.42E-22  |
| Unigene99712  | Potri.005G178000.1 | 2.4548  | 8.4484   | -1.7831 | Down | 2.31E-12  | 7.47E-12  |
| Unigene53676  | Potri.001G307400.2 | 11.868  | 40.8494  | -1.7832 | Down | 8.75E-25  | 4.55E-24  |
| Unigene33093  | Potri.014G121700.1 | 7.0312  | 24.2035  | -1.7834 | Down | 2.68E-26  | 1.46E-25  |
| Unigene44438  | Potri.013G092100.2 | 2.7067  | 9.3173   | -1.7834 | Down | 6.87E-14  | 2.38E-13  |
| Unigene36129  | Potri.010G027900.1 | 5.3848  | 18.5361  | -1.7834 | Down | 6.87E-14  | 2.38E-13  |
| Unigene9109   | Potri.017G078500.1 | 20.8439 | 71.7593  | -1.7835 | Down | 1.16E-41  | 9.44E-41  |

|               |                    |         |          |         |      |           |           |
|---------------|--------------------|---------|----------|---------|------|-----------|-----------|
| Unigene17541  | Potri.006G191500.4 | 18.0231 | 62.046   | -1.7835 | Down | 2.20E-92  | 4.24E-91  |
| Unigene32108  | Potri.003G074800.1 | 8.436   | 29.042   | -1.7835 | Down | 4.31E-80  | 7.08E-79  |
| Unigene26743  | Potri.017G094000.1 | 14.8338 | 51.0711  | -1.7836 | Down | 3.59E-43  | 3.03E-42  |
| Unigene13896  | Potri.003G044200.3 | 10.3287 | 35.56    | -1.7836 | Down | 1.79E-124 | 5.05E-123 |
| Unigene22072  | Potri.006G259500.1 | 8.7464  | 30.114   | -1.7837 | Down | 3.40E-115 | 8.70E-114 |
| Unigene45658  | Potri.008G040500.2 | 2.303   | 7.93     | -1.7838 | Down | 6.17E-17  | 2.44E-16  |
| Unigene39740  | Potri.017G067600.2 | 1.3597  | 4.6821   | -1.7839 | Down | 6.17E-17  | 2.44E-16  |
| Unigene37530  | Potri.006G256400.1 | 16.1581 | 55.6411  | -1.7839 | Down | 7.43E-34  | 5.00E-33  |
| Unigene119511 | Potri.005G097500.7 | 2.1271  | 7.325    | -1.7839 | Down | 1.86E-18  | 7.83E-18  |
| Unigene30795  | Potri.015G140900.1 | 5.1195  | 17.6303  | -1.784  | Down | 1.86E-18  | 7.83E-18  |
| Unigene11787  | Potri.003G047600.2 | 9.402   | 32.3806  | -1.7841 | Down | 2.20E-38  | 1.66E-37  |
| Unigene81358  | Potri.008G025800.5 | 9.692   | 33.3822  | -1.7842 | Down | 1.72E-21  | 8.03E-21  |
| Unigene83568  | Potri.019G079500.1 | 18.8562 | 64.9488  | -1.7843 | Down | 6.56E-43  | 5.50E-42  |
| Unigene53649  | Potri.017G058500.1 | 11.366  | 39.1504  | -1.7843 | Down | 5.24E-23  | 2.57E-22  |
| Unigene69731  | Potri.005G097300.1 | 2.3149  | 7.9738   | -1.7843 | Down | 5.24E-23  | 2.57E-22  |
| Unigene16780  | Potri.003G109000.1 | 9.8449  | 33.9109  | -1.7843 | Down | 5.24E-23  | 2.57E-22  |
| Unigene34485  | Potri.001G005100.1 | 3.9585  | 13.6353  | -1.7843 | Down | 5.24E-23  | 2.57E-22  |
| Unigene33666  | Potri.015G050800.1 | 16.198  | 55.7963  | -1.7844 | Down | 4.25E-90  | 7.96E-89  |
| Unigene32427  | Potri.013G069700.6 | 8.7014  | 29.9747  | -1.7844 | Down | 4.11E-96  | 8.34E-95  |
| Unigene92281  | Potri.003G052100.1 | 14.5676 | 50.1884  | -1.7846 | Down | 1.80E-56  | 2.00E-55  |
| Unigene44174  | Potri.001G136500.1 | 4.1611  | 14.3374  | -1.7847 | Down | 4.19E-35  | 2.91E-34  |
| Unigene73227  | Potri.007G021100.1 | 120.069 | 413.7163 | -1.7848 | Down | 8.29E-205 | 4.43E-203 |
| Unigene36422  | Potri.009G014700.2 | 11.5588 | 39.8319  | -1.7849 | Down | 3.72E-44  | 3.20E-43  |
| Unigene92857  | Potri.019G089700.1 | 45.3288 | 156.2583 | -1.7854 | Down | 1.73E-188 | 8.40E-187 |
| Unigene46428  | Potri.018G107400.1 | 1.6578  | 5.7152   | -1.7855 | Down | 1.76E-07  | 4.29E-07  |
| Unigene5216   | Potri.015G136700.1 | 1.0688  | 3.6846   | -1.7855 | Down | 2.43E-04  | 4.47E-04  |
| Unigene36555  | Potri.014G177800.1 | 0.9083  | 3.1313   | -1.7855 | Down | 6.39E-06  | 1.38E-05  |
| Unigene115503 | Potri.001G042900.1 | 1.2818  | 4.419    | -1.7855 | Down | 2.43E-04  | 4.47E-04  |
| Unigene26670  | Potri.T159900.1    | 3.6748  | 12.6692  | -1.7856 | Down | 1.76E-07  | 4.29E-07  |
| Unigene40494  | Potri.019G025500.1 | 1.2229  | 4.2162   | -1.7856 | Down | 2.43E-04  | 4.47E-04  |
| Unigene46683  | Potri.018G102800.1 | 11.7425 | 40.4829  | -1.7856 | Down | 2.76E-27  | 1.55E-26  |
| Unigene38105  | Potri.018G055700.1 | 9.2326  | 31.8299  | -1.7856 | Down | 1.13E-16  | 4.43E-16  |
| Unigene118185 | Potri.014G152000.1 | 1.8019  | 6.2122   | -1.7856 | Down | 1.76E-07  | 4.29E-07  |
| Unigene40363  | Potri.012G070500.3 | 1.5     | 5.1713   | -1.7856 | Down | 6.39E-06  | 1.38E-05  |
| Unigene33752  | Potri.012G044700.1 | 3.1796  | 10.962   | -1.7856 | Down | 7.05E-41  | 5.65E-40  |
| Unigene109537 | Potri.011G145100.1 | 1.7349  | 5.9811   | -1.7856 | Down | 2.43E-04  | 4.47E-04  |
| Unigene18212  | Potri.011G094100.4 | 2.0198  | 6.9635   | -1.7856 | Down | 1.45E-10  | 4.28E-10  |
| Unigene31201  | Potri.011G002500.2 | 1.457   | 5.0232   | -1.7856 | Down | 6.39E-06  | 1.38E-05  |
| Unigene6515   | Potri.010G211100.3 | 2.4539  | 8.46     | -1.7856 | Down | 5.02E-09  | 1.35E-08  |

|               |                    |         |          |         |      |           |           |
|---------------|--------------------|---------|----------|---------|------|-----------|-----------|
| Unigene3486   | Potri.010G119100.4 | 1.1841  | 4.0823   | -1.7856 | Down | 2.43E-04  | 4.47E-04  |
| Unigene36385  | Potri.010G001700.3 | 7.0985  | 24.4727  | -1.7856 | Down | 3.42E-18  | 1.42E-17  |
| Unigene3207   | Potri.009G016300.1 | 2.9309  | 10.1045  | -1.7856 | Down | 2.61E-30  | 1.60E-29  |
| Unigene110307 | Potri.008G099700.3 | 2.5202  | 8.6887   | -1.7856 | Down | 6.39E-06  | 1.38E-05  |
| Unigene119250 | Potri.008G017800.1 | 1.1566  | 3.9874   | -1.7856 | Down | 1.76E-07  | 4.29E-07  |
| Unigene27326  | Potri.007G132900.5 | 1.903   | 6.5608   | -1.7856 | Down | 6.39E-06  | 1.38E-05  |
| Unigene23415  | Potri.007G092700.4 | 2.2813  | 7.865    | -1.7856 | Down | 1.26E-13  | 4.34E-13  |
| Unigene31428  | Potri.003G218900.1 | 1.1057  | 3.812    | -1.7856 | Down | 6.39E-06  | 1.38E-05  |
| Unigene46403  | Potri.003G202100.1 | 13.4465 | 46.3579  | -1.7856 | Down | 2.37E-36  | 1.70E-35  |
| Unigene47793  | Potri.003G110100.5 | 1.5162  | 5.2273   | -1.7856 | Down | 2.43E-04  | 4.47E-04  |
| Unigene25701  | Potri.003G101000.1 | 2.0768  | 7.1599   | -1.7856 | Down | 5.02E-09  | 1.35E-08  |
| Unigene37456  | Potri.003G038300.2 | 1.6008  | 5.519    | -1.7856 | Down | 2.43E-04  | 4.47E-04  |
| Unigene49365  | Potri.003G019500.4 | 1.6331  | 5.6302   | -1.7856 | Down | 5.02E-09  | 1.35E-08  |
| Unigene3758   | Potri.002G160200.1 | 3.8692  | 13.3395  | -1.7856 | Down | 5.02E-09  | 1.35E-08  |
| Unigene28232  | Potri.002G081300.1 | 2.4064  | 8.2963   | -1.7856 | Down | 1.76E-07  | 4.29E-07  |
| Unigene43517  | Potri.002G036800.4 | 15.0633 | 51.9317  | -1.7856 | Down | 5.53E-65  | 7.18E-64  |
| Unigene23876  | Potri.001G419300.1 | 1.3688  | 4.719    | -1.7856 | Down | 1.76E-07  | 4.29E-07  |
| Unigene101267 | Potri.001G358500.2 | 0.8923  | 3.0764   | -1.7856 | Down | 2.43E-04  | 4.47E-04  |
| Unigene119362 | Potri.001G345200.2 | 1.306   | 4.5025   | -1.7856 | Down | 5.02E-09  | 1.35E-08  |
| Unigene14762  | Potri.001G204600.1 | 1.3393  | 4.6173   | -1.7856 | Down | 1.76E-07  | 4.29E-07  |
| Unigene25977  | Potri.001G156000.1 | 4.7472  | 16.3663  | -1.7856 | Down | 4.27E-12  | 1.36E-11  |
| Unigene4075   | Potri.001G003700.1 | 3.008   | 10.3704  | -1.7856 | Down | 1.45E-10  | 4.28E-10  |
| Unigene93558  | Potri.010G064900.1 | 36.3655 | 125.3859 | -1.7857 | Down | 1.88E-177 | 8.36E-176 |
| Unigene1228   | Potri.015G089300.1 | 22.0619 | 76.09    | -1.7861 | Down | 6.95E-144 | 2.35E-142 |
| Unigene40265  | Potri.005G106400.8 | 10.7098 | 36.9359  | -1.7861 | Down | 3.50E-54  | 3.72E-53  |
| Unigene48166  | Potri.012G074700.1 | 24.575  | 84.7657  | -1.7863 | Down | 5.27E-78  | 8.39E-77  |
| Unigene80134  | Potri.017G032200.1 | 31.5378 | 108.7941 | -1.7864 | Down | 1.84E-64  | 2.37E-63  |
| Unigene37790  | Potri.004G103700.4 | 11.8188 | 40.7693  | -1.7864 | Down | 1.40E-34  | 9.60E-34  |
| Unigene21313  | Potri.018G087800.2 | 5.7373  | 19.7953  | -1.7867 | Down | 7.99E-121 | 2.17E-119 |
| Unigene21849  | Potri.011G078800.3 | 11.5993 | 40.0219  | -1.7868 | Down | 4.25E-140 | 1.39E-138 |
| Unigene2427   | Potri.003G105200.2 | 5.0365  | 17.3795  | -1.7869 | Down | 1.76E-22  | 8.49E-22  |
| Unigene3706   | Potri.005G154900.1 | 65.295  | 225.3593 | -1.7872 | Down | 1.22E-238 | 7.87E-237 |
| Unigene39439  | Potri.007G106400.2 | 6.5289  | 22.535   | -1.7873 | Down | 2.56E-34  | 1.74E-33  |
| Unigene40091  | Potri.006G039500.1 | 3.0987  | 10.6954  | -1.7873 | Down | 6.28E-18  | 2.58E-17  |
| Unigene16680  | Potri.T173700.3    | 41.1711 | 142.1234 | -1.7874 | Down | 2.63E-133 | 8.10E-132 |
| Unigene45770  | Potri.011G084400.1 | 6.0923  | 21.0303  | -1.7874 | Down | 2.08E-16  | 8.06E-16  |
| Unigene49699  | Potri.016G004900.2 | 7.6239  | 26.3191  | -1.7875 | Down | 8.73E-30  | 5.26E-29  |
| Unigene13747  | Potri.001G407000.1 | 3.0059  | 10.3771  | -1.7875 | Down | 8.73E-30  | 5.26E-29  |
| Unigene45953  | Potri.019G032800.6 | 7.5283  | 25.9913  | -1.7876 | Down | 6.94E-15  | 2.52E-14  |

|               |                    |          |          |         |      |           |           |
|---------------|--------------------|----------|----------|---------|------|-----------|-----------|
| Unigene2187   | Potri.010G097700.1 | 2.5056   | 8.6506   | -1.7876 | Down | 6.94E-15  | 2.52E-14  |
| Unigene46686  | Potri.008G119000.1 | 6.5647   | 22.6645  | -1.7876 | Down | 6.94E-15  | 2.52E-14  |
| Unigene804    | Potri.008G160400.3 | 14.45    | 49.8935  | -1.7878 | Down | 2.71E-137 | 8.68E-136 |
| Unigene28790  | Potri.008G109300.1 | 11.7818  | 40.6806  | -1.7878 | Down | 1.12E-63  | 1.42E-62  |
| Unigene79927  | Potri.005G211500.2 | 36.3861  | 125.6403 | -1.7878 | Down | 5.95E-74  | 8.89E-73  |
| Unigene18154  | Potri.018G121500.1 | 3.3099   | 11.4292  | -1.7879 | Down | 3.01E-25  | 1.59E-24  |
| Unigene25740  | Potri.006G281400.2 | 13.6206  | 47.0332  | -1.7879 | Down | 1.15E-60  | 1.38E-59  |
| Unigene48624  | Potri.003G019500.3 | 16.845   | 58.1713  | -1.788  | Down | 1.45E-35  | 1.02E-34  |
| Unigene33037  | Potri.002G173000.1 | 11.3097  | 39.0555  | -1.788  | Down | 2.27E-47  | 2.10E-46  |
| Unigene86025  | Potri.010G116600.3 | 31.7737  | 109.7313 | -1.7881 | Down | 3.33E-78  | 5.31E-77  |
| Unigene24512  | Potri.008G156000.1 | 7.7685   | 26.8284  | -1.7881 | Down | 7.29E-46  | 6.52E-45  |
| Unigene17605  | Potri.019G018500.5 | 8.1555   | 28.1684  | -1.7882 | Down | 3.22E-22  | 1.54E-21  |
| Unigene106326 | Potri.009G018500.1 | 1.9451   | 6.7181   | -1.7882 | Down | 7.86E-12  | 2.47E-11  |
| Unigene48882  | Potri.006G181800.1 | 2.0621   | 7.1223   | -1.7882 | Down | 7.86E-12  | 2.47E-11  |
| Unigene53150  | Potri.004G082800.1 | 10.9326  | 37.7602  | -1.7882 | Down | 3.22E-22  | 1.54E-21  |
| Unigene105736 | Potri.001G047400.1 | 3.797    | 13.1143  | -1.7882 | Down | 7.86E-12  | 2.47E-11  |
| Unigene80062  | Potri.004G113800.2 | 110.3824 | 381.2694 | -1.7883 | Down | 1.53E-221 | 8.93E-220 |
| Unigene82579  | Potri.006G166500.2 | 8.969    | 30.9825  | -1.7884 | Down | 1.06E-20  | 4.82E-20  |
| Unigene18030  | Potri.005G048900.1 | 6.8784   | 23.7597  | -1.7884 | Down | 4.92E-31  | 3.07E-30  |
| Unigene42147  | Potri.003G107900.2 | 3.0557   | 10.5562  | -1.7885 | Down | 1.60E-29  | 9.56E-29  |
| Unigene44865  | Potri.019G104400.1 | 1.9596   | 6.7703   | -1.7887 | Down | 3.48E-19  | 1.51E-18  |
| Unigene52230  | Potri.014G165600.3 | 3.5582   | 12.2935  | -1.7887 | Down | 2.68E-10  | 7.79E-10  |
| Unigene109421 | Potri.014G029700.1 | 10.1092  | 34.9273  | -1.7887 | Down | 3.48E-19  | 1.51E-18  |
| Unigene70450  | Potri.008G124700.1 | 10.8169  | 37.3722  | -1.7887 | Down | 3.48E-19  | 1.51E-18  |
| Unigene102478 | Potri.008G088600.2 | 1.9094   | 6.597    | -1.7887 | Down | 3.48E-19  | 1.51E-18  |
| Unigene12207  | Potri.002G241300.1 | 5.7384   | 19.8261  | -1.7887 | Down | 8.18E-37  | 5.95E-36  |
| Unigene29818  | Potri.002G038800.3 | 2.6383   | 9.1152   | -1.7887 | Down | 2.68E-10  | 7.79E-10  |
| Unigene45948  | Potri.001G233800.7 | 5.0546   | 17.4637  | -1.7887 | Down | 2.68E-10  | 7.79E-10  |
| Unigene42714  | Potri.007G094100.1 | 9.3056   | 32.1565  | -1.7889 | Down | 1.13E-74  | 1.71E-73  |
| Unigene26317  | Potri.009G052800.1 | 14.5895  | 50.4169  | -1.789  | Down | 8.56E-34  | 5.75E-33  |
| Unigene63355  | Potri.013G056600.1 | 11.1276  | 38.4589  | -1.7892 | Down | 1.43E-39  | 1.11E-38  |
| Unigene7786   | Potri.018G002800.1 | 2.4509   | 8.4716   | -1.7893 | Down | 8.99E-31  | 5.58E-30  |
| Unigene119208 | Potri.010G191800.3 | 1.4392   | 4.9747   | -1.7893 | Down | 9.29E-09  | 2.47E-08  |
| Unigene17353  | Potri.001G369200.1 | 18.2958  | 63.2404  | -1.7893 | Down | 1.90E-103 | 4.23E-102 |
| Unigene74912  | Potri.001G163300.2 | 8.2127   | 28.3877  | -1.7893 | Down | 3.82E-16  | 1.46E-15  |
| Unigene107585 | Potri.001G072700.2 | 8.8633   | 30.6362  | -1.7893 | Down | 3.82E-16  | 1.46E-15  |
| Unigene32766  | Potri.018G099400.6 | 6.336    | 21.903   | -1.7895 | Down | 1.49E-36  | 1.08E-35  |
| Unigene21964  | Potri.010G046000.4 | 3.7844   | 13.0822  | -1.7895 | Down | 7.82E-44  | 6.69E-43  |
| Unigene14309  | Potri.017G007200.1 | 7.9336   | 27.428   | -1.7896 | Down | 5.90E-22  | 2.80E-21  |

|               |                    |         |          |         |      |           |           |
|---------------|--------------------|---------|----------|---------|------|-----------|-----------|
| Unigene2058   | Potri.019G126500.5 | 13.5025 | 46.685   | -1.7897 | Down | 3.61E-87  | 6.52E-86  |
| Unigene24476  | Potri.017G056700.1 | 3.5802  | 12.3782  | -1.7897 | Down | 4.83E-35  | 3.35E-34  |
| Unigene31156  | Potri.016G085900.3 | 9.3249  | 32.2539  | -1.7903 | Down | 1.01E-24  | 5.24E-24  |
| Unigene3986   | Potri.016G007500.1 | 6.3465  | 21.9519  | -1.7903 | Down | 6.39E-19  | 2.73E-18  |
| Unigene53267  | Potri.009G160600.2 | 2.4693  | 8.5411   | -1.7903 | Down | 3.28E-07  | 7.83E-07  |
| Unigene90170  | Potri.009G131700.1 | 7.5594  | 26.1472  | -1.7903 | Down | 1.01E-24  | 5.23E-24  |
| Unigene61579  | Potri.008G139900.1 | 3.6593  | 12.6573  | -1.7903 | Down | 6.39E-19  | 2.73E-18  |
| Unigene11131  | Potri.008G032800.2 | 16.6359 | 57.5422  | -1.7903 | Down | 6.48E-117 | 1.69E-115 |
| Unigene89844  | Potri.006G253500.2 | 1.9363  | 6.6975   | -1.7903 | Down | 3.28E-07  | 7.83E-07  |
| Unigene21364  | Potri.005G051400.1 | 4.828   | 16.6989  | -1.7903 | Down | 3.67E-101 | 7.96E-100 |
| Unigene14288  | Potri.005G027900.2 | 2.3942  | 8.2814   | -1.7903 | Down | 3.28E-07  | 7.83E-07  |
| Unigene104747 | Potri.001G211300.1 | 1.8456  | 6.3836   | -1.7903 | Down | 3.28E-07  | 7.83E-07  |
| Unigene39612  | Potri.014G135700.2 | 14.2587 | 49.3279  | -1.7906 | Down | 2.15E-89  | 4.00E-88  |
| Unigene81496  | Potri.009G121300.2 | 51.9268 | 179.6515 | -1.7906 | Down | 2.12E-109 | 5.07E-108 |
| Unigene22773  | Potri.015G140100.1 | 1.8043  | 6.2427   | -1.7907 | Down | 2.11E-17  | 8.52E-17  |
| Unigene53614  | Potri.018G097700.2 | 8.6203  | 29.8264  | -1.7908 | Down | 2.11E-17  | 8.52E-17  |
| Unigene27108  | Potri.011G094100.4 | 14.0889 | 48.7477  | -1.7908 | Down | 4.45E-49  | 4.26E-48  |
| Unigene89839  | Potri.010G090900.3 | 19.2612 | 66.646   | -1.7908 | Down | 4.23E-59  | 4.95E-58  |
| Unigene53365  | Potri.019G057500.4 | 3.2138  | 11.1218  | -1.791  | Down | 1.45E-11  | 4.50E-11  |
| Unigene16969  | Potri.016G132000.1 | 3.3267  | 11.5125  | -1.791  | Down | 1.45E-11  | 4.50E-11  |
| Unigene103768 | Potri.014G123900.1 | 1.8454  | 6.3863   | -1.791  | Down | 1.45E-11  | 4.50E-11  |
| Unigene34328  | Potri.009G051900.1 | 1.3556  | 4.6912   | -1.791  | Down | 1.45E-11  | 4.50E-11  |
| Unigene20342  | Potri.001G368700.1 | 3.6096  | 12.4916  | -1.791  | Down | 1.45E-11  | 4.50E-11  |
| Unigene26371  | Potri.009G074400.1 | 37.2044 | 128.7567 | -1.7911 | Down | 2.21E-120 | 5.99E-119 |
| Unigene24170  | Potri.001G114800.3 | 4.1902  | 14.5009  | -1.7911 | Down | 8.40E-42  | 6.87E-41  |
| Unigene20503  | Potri.010G045100.1 | 4.5892  | 15.8847  | -1.7913 | Down | 7.02E-16  | 2.66E-15  |
| Unigene3170   | Potri.001G249100.1 | 10.5277 | 36.4387  | -1.7913 | Down | 7.44E-69  | 1.03E-67  |
| Unigene33314  | Potri.008G043000.1 | 14.1702 | 49.0496  | -1.7914 | Down | 8.11E-49  | 7.73E-48  |
| Unigene41575  | Potri.010G100900.1 | 9.991   | 34.588   | -1.7916 | Down | 1.85E-24  | 9.51E-24  |
| Unigene21337  | Potri.004G169900.1 | 3.1318  | 10.8419  | -1.7916 | Down | 7.61E-66  | 1.00E-64  |
| Unigene21669  | Potri.001G246400.1 | 3.978   | 13.7723  | -1.7917 | Down | 7.92E-56  | 8.72E-55  |
| Unigene12622  | Potri.017G033200.2 | 7.7153  | 26.7137  | -1.7918 | Down | 8.39E-46  | 7.50E-45  |
| Unigene17544  | Potri.006G130500.1 | 23.0631 | 79.8591  | -1.7919 | Down | 1.35E-75  | 2.07E-74  |
| Unigene104732 | Potri.014G044800.2 | 1.4268  | 4.9408   | -1.792  | Down | 1.20E-05  | 2.51E-05  |
| Unigene60793  | Potri.013G144600.1 | 2.4176  | 8.3719   | -1.792  | Down | 1.20E-05  | 2.51E-05  |
| Unigene46071  | Potri.013G085000.1 | 7.016   | 24.2962  | -1.792  | Down | 1.69E-31  | 1.07E-30  |
| Unigene85421  | Potri.011G122500.2 | 7.2276  | 25.0288  | -1.792  | Down | 1.17E-18  | 4.96E-18  |
| Unigene45889  | Potri.010G056900.5 | 7.0093  | 24.2729  | -1.792  | Down | 1.17E-18  | 4.96E-18  |
| Unigene53238  | Potri.008G163300.2 | 13.6394 | 47.2326  | -1.792  | Down | 1.69E-31  | 1.07E-30  |

|               |                    |         |          |         |      |           |          |
|---------------|--------------------|---------|----------|---------|------|-----------|----------|
| Unigene110348 | Potri.007G018100.4 | 2.3522  | 8.1456   | -1.792  | Down | 1.20E-05  | 2.51E-05 |
| Unigene56467  | Potri.007G013000.1 | 4.3276  | 14.9862  | -1.792  | Down | 2.35E-14  | 8.30E-14 |
| Unigene108806 | Potri.006G247300.7 | 4.9733  | 17.2222  | -1.792  | Down | 4.96E-10  | 1.42E-09 |
| Unigene118083 | Potri.002G023300.1 | 1.2862  | 4.454    | -1.792  | Down | 1.20E-05  | 2.51E-05 |
| Unigene47051  | Potri.001G417000.1 | 1.7582  | 6.0887   | -1.792  | Down | 1.20E-05  | 2.51E-05 |
| Unigene16775  | Potri.010G133900.1 | 1.3563  | 4.697    | -1.7921 | Down | 1.20E-05  | 2.51E-05 |
| Unigene21582  | Potri.009G047400.2 | 4.9457  | 17.1281  | -1.7921 | Down | 2.42E-85  | 4.27E-84 |
| Unigene36829  | Potri.001G052100.1 | 17.2773 | 59.8429  | -1.7923 | Down | 2.95E-34  | 2.01E-33 |
| Unigene45807  | Potri.014G091200.1 | 26.8973 | 93.1784  | -1.7925 | Down | 8.22E-57  | 9.22E-56 |
| Unigene52599  | Potri.006G013000.1 | 3.9222  | 13.5884  | -1.7926 | Down | 3.88E-17  | 1.55E-16 |
| Unigene6071   | Potri.003G116400.1 | 7.1784  | 24.8693  | -1.7926 | Down | 3.88E-17  | 1.55E-16 |
| Unigene83083  | Potri.015G109300.3 | 19.4911 | 67.5293  | -1.7927 | Down | 4.93E-44  | 4.23E-43 |
| Unigene22000  | Potri.001G146600.1 | 9.9766  | 34.5683  | -1.7928 | Down | 4.53E-96  | 9.21E-95 |
| Unigene50451  | Potri.013G000700.1 | 3.7401  | 12.9595  | -1.7929 | Down | 3.38E-24  | 1.73E-23 |
| Unigene29967  | Potri.005G083600.2 | 3.5027  | 12.1372  | -1.7929 | Down | 7.89E-13  | 2.61E-12 |
| Unigene70981  | Potri.015G103500.5 | 4.2681  | 14.7946  | -1.7934 | Down | 1.72E-08  | 4.50E-08 |
| Unigene16924  | Potri.012G034200.1 | 8.494   | 29.4426  | -1.7934 | Down | 1.00E-29  | 6.05E-29 |
| Unigene118170 | Potri.007G046700.3 | 2.0772  | 7.2003   | -1.7934 | Down | 1.72E-08  | 4.50E-08 |
| Unigene27304  | Potri.017G050800.1 | 20.6706 | 71.6615  | -1.7936 | Down | 2.74E-56  | 3.04E-55 |
| Unigene27646  | Potri.007G028800.1 | 10.9513 | 37.9657  | -1.7936 | Down | 1.75E-32  | 1.13E-31 |
| Unigene99781  | Potri.003G085500.1 | 42.4878 | 147.2954 | -1.7936 | Down | 4.80E-94  | 9.48E-93 |
| Unigene25523  | Potri.018G076900.1 | 9.6768  | 33.5509  | -1.7937 | Down | 2.15E-18  | 9.02E-18 |
| Unigene6296   | Potri.003G136300.1 | 1.9783  | 6.859    | -1.7937 | Down | 2.15E-18  | 9.02E-18 |
| Unigene71140  | Potri.017G044700.1 | 10.1558 | 35.2118  | -1.7938 | Down | 2.15E-18  | 9.02E-18 |
| Unigene30918  | Potri.015G006700.6 | 9.4885  | 32.9002  | -1.7938 | Down | 3.27E-28  | 1.88E-27 |
| Unigene18588  | Potri.010G060500.1 | 4.507   | 15.6276  | -1.7939 | Down | 3.27E-28  | 1.88E-27 |
| Unigene31365  | Potri.T159500.1    | 2.6118  | 9.0571   | -1.794  | Down | 2.67E-11  | 8.20E-11 |
| Unigene20406  | Potri.015G041200.1 | 1.996   | 6.9215   | -1.794  | Down | 2.67E-11  | 8.20E-11 |
| Unigene2300   | Potri.010G024900.2 | 3.4298  | 11.8939  | -1.794  | Down | 3.63E-21  | 1.68E-20 |
| Unigene26491  | Potri.006G045500.1 | 15.7287 | 54.5486  | -1.7941 | Down | 9.85E-34  | 6.61E-33 |
| Unigene60759  | Potri.016G138400.2 | 4.2412  | 14.7095  | -1.7942 | Down | 6.19E-24  | 3.13E-23 |
| Unigene104447 | Potri.014G142800.2 | 1.1006  | 3.8171   | -1.7942 | Down | 6.19E-24  | 3.13E-23 |
| Unigene12181  | Potri.009G026200.5 | 7.1466  | 24.7862  | -1.7942 | Down | 6.19E-24  | 3.13E-23 |
| Unigene2023   | Potri.014G131600.3 | 6.6301  | 22.9959  | -1.7943 | Down | 5.11E-49  | 4.89E-48 |
| Unigene119227 | Potri.T024400.1    | 2.4121  | 8.3666   | -1.7944 | Down | 4.31E-14  | 1.51E-13 |
| Unigene43796  | Potri.006G141400.1 | 13.0252 | 45.1818  | -1.7944 | Down | 5.29E-42  | 4.35E-41 |
| Unigene36379  | Potri.002G172900.1 | 24.7951 | 86.0125  | -1.7945 | Down | 1.59E-72  | 2.32E-71 |
| Unigene81014  | Potri.017G051700.1 | 26.1985 | 90.8951  | -1.7947 | Down | 9.11E-56  | 1.00E-54 |
| Unigene43767  | Potri.019G062200.1 | 7.8602  | 27.2723  | -1.7948 | Down | 5.34E-100 | 1.14E-98 |



|               |                    |         |          |         |      |           |           |
|---------------|--------------------|---------|----------|---------|------|-----------|-----------|
| Unigene11848  | Potri.001G216900.1 | 5.4763  | 19.0028  | -1.7949 | Down | 2.01E-145 | 6.90E-144 |
| Unigene454    | Potri.009G118400.1 | 9.169   | 31.818   | -1.795  | Down | 5.13E-217 | 2.94E-215 |
| Unigene7187   | Potri.007G024100.1 | 27.5443 | 95.6014  | -1.7953 | Down | 7.19E-163 | 2.88E-161 |
| Unigene47818  | Potri.012G126000.2 | 31.3681 | 108.881  | -1.7954 | Down | 9.60E-86  | 1.70E-84  |
| Unigene103584 | Potri.018G130500.3 | 1.5399  | 5.3457   | -1.7955 | Down | 4.62E-04  | 8.21E-04  |
| Unigene11067  | Potri.017G094400.1 | 5.7749  | 20.0461  | -1.7955 | Down | 3.46E-124 | 9.69E-123 |
| Unigene3212   | Potri.016G058100.1 | 4.1213  | 14.307   | -1.7955 | Down | 5.83E-32  | 3.74E-31  |
| Unigene53117  | Potri.010G246000.1 | 1.4854  | 5.1565   | -1.7955 | Down | 4.62E-04  | 8.21E-04  |
| Unigene48618  | Potri.010G078500.2 | 1.5259  | 5.2971   | -1.7955 | Down | 4.62E-04  | 8.21E-04  |
| Unigene95941  | Potri.002G105900.2 | 1.4105  | 4.8965   | -1.7955 | Down | 6.11E-07  | 1.43E-06  |
| Unigene38154  | Potri.002G026600.2 | 1.9238  | 6.6783   | -1.7955 | Down | 6.11E-07  | 1.43E-06  |
| Unigene101007 | Potri.019G078400.1 | 0.9222  | 3.2016   | -1.7956 | Down | 4.62E-04  | 8.21E-04  |
| Unigene92801  | Potri.018G023900.2 | 1.3242  | 4.5971   | -1.7956 | Down | 6.11E-07  | 1.43E-06  |
| Unigene2994   | Potri.015G032500.3 | 1.4986  | 5.2025   | -1.7956 | Down | 9.17E-10  | 2.58E-09  |
| Unigene36204  | Potri.014G115000.1 | 15.9098 | 55.2309  | -1.7956 | Down | 3.36E-29  | 1.99E-28  |
| Unigene117102 | Potri.014G040200.1 | 0.973   | 3.3779   | -1.7956 | Down | 4.62E-04  | 8.21E-04  |
| Unigene99802  | Potri.014G001900.1 | 0.8719  | 3.0269   | -1.7956 | Down | 4.62E-04  | 8.21E-04  |
| Unigene102680 | Potri.011G122500.1 | 1.0142  | 3.5208   | -1.7956 | Down | 4.62E-04  | 8.21E-04  |
| Unigene56469  | Potri.011G050600.1 | 0.9273  | 3.2193   | -1.7956 | Down | 9.17E-10  | 2.58E-09  |
| Unigene53668  | Potri.010G178600.3 | 13.9873 | 48.5571  | -1.7956 | Down | 3.36E-29  | 1.99E-28  |
| Unigene52775  | Potri.005G108200.2 | 1.2342  | 4.2845   | -1.7956 | Down | 4.62E-04  | 8.21E-04  |
| Unigene46007  | Potri.005G097400.4 | 1.4986  | 5.2025   | -1.7956 | Down | 4.62E-04  | 8.21E-04  |
| Unigene85847  | Potri.005G091200.1 | 2.2836  | 7.9277   | -1.7956 | Down | 6.11E-07  | 1.43E-06  |
| Unigene95475  | Potri.004G040200.1 | 2.6329  | 9.1402   | -1.7956 | Down | 1.45E-12  | 4.74E-12  |
| Unigene51563  | Potri.002G162000.3 | 1.8806  | 6.5287   | -1.7956 | Down | 6.11E-07  | 1.43E-06  |
| Unigene15236  | Potri.001G266400.1 | 6.2747  | 21.7826  | -1.7956 | Down | 1.45E-12  | 4.74E-12  |
| Unigene41553  | Potri.012G144200.2 | 14.2045 | 49.3232  | -1.7959 | Down | 3.10E-44  | 2.68E-43  |
| Unigene3276   | Potri.007G006600.1 | 3.8327  | 13.3105  | -1.7961 | Down | 1.72E-56  | 1.92E-55  |
| Unigene17771  | Potri.004G031500.3 | 7.4952  | 26.0301  | -1.7961 | Down | 1.09E-27  | 6.20E-27  |
| Unigene23929  | Potri.005G057300.1 | 10.8906 | 37.8236  | -1.7962 | Down | 1.88E-97  | 3.89E-96  |
| Unigene48384  | Potri.010G239900.6 | 25.1055 | 87.1967  | -1.7963 | Down | 3.87E-130 | 1.15E-128 |
| Unigene67449  | Potri.004G141300.1 | 5.1023  | 17.7232  | -1.7964 | Down | 2.19E-19  | 9.53E-19  |
| Unigene678    | Potri.004G173600.2 | 4.3428  | 15.0858  | -1.7965 | Down | 1.86E-34  | 1.27E-33  |
| Unigene80767  | Potri.001G346200.1 | 37.8963 | 131.6467 | -1.7965 | Down | 1.82E-79  | 2.96E-78  |
| Unigene35081  | Potri.006G086300.1 | 7.9752  | 27.7066  | -1.7966 | Down | 3.51E-101 | 7.62E-100 |
| Unigene88623  | Potri.013G115100.1 | 22.1362 | 76.9123  | -1.7968 | Down | 5.65E-63  | 7.08E-62  |
| Unigene20274  | Potri.006G201600.1 | 20.1437 | 69.9866  | -1.7968 | Down | 1.01E-65  | 1.32E-64  |
| Unigene14360  | Potri.005G237700.1 | 2.458   | 8.5402   | -1.7968 | Down | 7.93E-14  | 2.74E-13  |
| Unigene3105   | Potri.001G453500.1 | 5.8879  | 20.4573  | -1.7968 | Down | 5.65E-63  | 7.08E-62  |

|               |                    |         |          |         |      |           |           |
|---------------|--------------------|---------|----------|---------|------|-----------|-----------|
| Unigene32396  | Potri.010G102000.1 | 8.0691  | 28.0375  | -1.7969 | Down | 3.48E-94  | 6.88E-93  |
| Unigene118002 | Potri.007G021800.2 | 2.898   | 10.0715  | -1.7971 | Down | 4.93E-11  | 1.49E-10  |
| Unigene41034  | Potri.006G218900.1 | 45.0737 | 156.6421 | -1.7971 | Down | 1.69E-168 | 7.08E-167 |
| Unigene34796  | Potri.014G048700.1 | 8.1306  | 28.2583  | -1.7972 | Down | 5.74E-56  | 6.33E-55  |
| Unigene88311  | Potri.013G058300.5 | 20.9599 | 72.8433  | -1.7972 | Down | 1.02E-58  | 1.18E-57  |
| Unigene6943   | Potri.009G166900.2 | 5.011   | 17.415   | -1.7972 | Down | 1.06E-77  | 1.68E-76  |
| Unigene7615   | Potri.009G014900.3 | 1.4711  | 5.1126   | -1.7972 | Down | 4.93E-11  | 1.49E-10  |
| Unigene116162 | Potri.008G089400.1 | 11.1899 | 38.8889  | -1.7972 | Down | 3.46E-30  | 2.11E-29  |
| Unigene9163   | Potri.007G047800.1 | 4.5884  | 15.9465  | -1.7972 | Down | 4.93E-11  | 1.49E-10  |
| Unigene33406  | Potri.013G003200.1 | 9.5961  | 33.3528  | -1.7973 | Down | 5.93E-37  | 4.32E-36  |
| Unigene381    | Potri.009G159000.1 | 8.1335  | 28.2775  | -1.7977 | Down | 1.21E-101 | 2.65E-100 |
| Unigene44588  | Potri.001G051200.2 | 23.9454 | 83.2479  | -1.7977 | Down | 1.97E-81  | 3.29E-80  |
| Unigene6881   | Potri.017G078500.1 | 9.9165  | 34.4791  | -1.7978 | Down | 1.12E-28  | 6.57E-28  |
| Unigene44911  | Potri.011G119400.1 | 9.576   | 33.2953  | -1.7978 | Down | 2.06E-89  | 3.82E-88  |
| Unigene512    | Potri.011G065700.4 | 2.6949  | 9.3699   | -1.7978 | Down | 1.12E-28  | 6.57E-28  |
| Unigene84910  | Potri.008G043700.3 | 11.5984 | 40.3272  | -1.7978 | Down | 1.12E-28  | 6.57E-28  |
| Unigene52793  | Potri.005G221600.1 | 2.2922  | 7.9697   | -1.7978 | Down | 3.19E-08  | 8.19E-08  |
| Unigene106800 | Potri.003G048800.1 | 1.0245  | 3.562    | -1.7978 | Down | 3.19E-08  | 8.19E-08  |
| Unigene13796  | Potri.002G050800.4 | 12.93   | 44.9588  | -1.7979 | Down | 3.87E-100 | 8.30E-99  |
| Unigene21864  | Potri.008G069300.2 | 14.2241 | 49.4616  | -1.798  | Down | 2.58E-128 | 7.50E-127 |
| Unigene68199  | Potri.006G165300.2 | 2.6743  | 9.3007   | -1.7982 | Down | 4.02E-19  | 1.73E-18  |
| Unigene17236  | Potri.002G152100.1 | 7.3313  | 25.4968  | -1.7982 | Down | 1.08E-36  | 7.85E-36  |
| Unigene34884  | Potri.011G003500.1 | 2.9469  | 10.2504  | -1.7984 | Down | 6.20E-34  | 4.18E-33  |
| Unigene100304 | Potri.010G212100.2 | 2.0462  | 7.1174   | -1.7984 | Down | 2.67E-12  | 8.61E-12  |
| Unigene48133  | Potri.009G135400.2 | 2.0526  | 7.1398   | -1.7984 | Down | 2.67E-12  | 8.61E-12  |
| Unigene42368  | Potri.006G214000.2 | 5.0211  | 17.4651  | -1.7984 | Down | 6.20E-34  | 4.18E-33  |
| Unigene90971  | Potri.006G147500.1 | 12.1851 | 42.3899  | -1.7986 | Down | 6.08E-42  | 4.99E-41  |
| Unigene51253  | Potri.016G114500.7 | 5.13    | 17.8473  | -1.7987 | Down | 2.40E-16  | 9.27E-16  |
| Unigene114519 | Potri.013G056600.3 | 19.8197 | 68.9525  | -1.7987 | Down | 6.07E-46  | 5.44E-45  |
| Unigene13518  | Potri.012G104400.1 | 2.935   | 10.211   | -1.7987 | Down | 2.40E-16  | 9.27E-16  |
| Unigene75991  | Potri.012G102500.3 | 15.9855 | 55.6135  | -1.7987 | Down | 3.56E-31  | 2.23E-30  |
| Unigene33460  | Potri.009G016900.2 | 5.6568  | 19.68    | -1.7987 | Down | 3.56E-31  | 2.23E-30  |
| Unigene5346   | Potri.001G374000.1 | 10.7208 | 37.2976  | -1.7987 | Down | 3.56E-31  | 2.23E-30  |
| Unigene28409  | Potri.003G097800.1 | 7.1138  | 24.7533  | -1.7989 | Down | 2.13E-24  | 1.09E-23  |
| Unigene32074  | Potri.017G016900.1 | 13.1706 | 45.8317  | -1.799  | Down | 1.53E-120 | 4.15E-119 |
| Unigene46320  | Potri.010G199600.3 | 26.3601 | 91.7302  | -1.799  | Down | 3.56E-63  | 4.48E-62  |
| Unigene33825  | Potri.004G034800.1 | 6.0338  | 20.9964  | -1.799  | Down | 3.52E-59  | 4.12E-58  |
| Unigene53839  | Potri.001G326700.2 | 9.9848  | 34.7447  | -1.799  | Down | 2.05E-28  | 1.19E-27  |
| Unigene2299   | Potri.002G232500.1 | 22.919  | 79.7652  | -1.7992 | Down | 2.03E-64  | 2.61E-63  |

|               |                     |         |          |         |      |           |           |
|---------------|---------------------|---------|----------|---------|------|-----------|-----------|
| Unigene13173  | Potri.018G027800.7  | 1.1856  | 4.1266   | -1.7993 | Down | 2.25E-05  | 4.59E-05  |
| Unigene118532 | Potri.001G025100.16 | 1.0752  | 3.7423   | -1.7993 | Down | 2.25E-05  | 4.59E-05  |
| Unigene60902  | Potri.T087700.2     | 3.6276  | 12.6268  | -1.7994 | Down | 1.46E-13  | 5.00E-13  |
| Unigene29495  | Potri.016G045200.1  | 5.5206  | 19.2157  | -1.7994 | Down | 1.19E-25  | 6.36E-25  |
| Unigene12263  | Potri.015G109300.4  | 1.4431  | 5.0232   | -1.7994 | Down | 2.25E-05  | 4.59E-05  |
| Unigene16035  | Potri.013G058300.5  | 5.2706  | 18.3454  | -1.7994 | Down | 1.33E-17  | 5.40E-17  |
| Unigene4816   | Potri.010G232700.3  | 1.237   | 4.3056   | -1.7994 | Down | 2.25E-05  | 4.59E-05  |
| Unigene49125  | Potri.010G176500.1  | 2.1408  | 7.4516   | -1.7994 | Down | 1.70E-09  | 4.70E-09  |
| Unigene46500  | Potri.008G198900.2  | 5.6879  | 19.798   | -1.7994 | Down | 1.33E-17  | 5.40E-17  |
| Unigene91029  | Potri.008G109300.2  | 1.2032  | 4.188    | -1.7994 | Down | 2.25E-05  | 4.59E-05  |
| Unigene29023  | Potri.007G033000.1  | 8.5771  | 29.8546  | -1.7994 | Down | 1.14E-61  | 1.39E-60  |
| Unigene77270  | Potri.006G049300.1  | 4.2165  | 14.6763  | -1.7994 | Down | 1.70E-09  | 4.70E-09  |
| Unigene106956 | Potri.006G005100.1  | 1.6767  | 5.836    | -1.7994 | Down | 1.25E-21  | 5.85E-21  |
| Unigene19560  | Potri.005G040000.1  | 1.7074  | 5.9429   | -1.7994 | Down | 1.70E-09  | 4.70E-09  |
| Unigene22385  | Potri.004G212700.2  | 3.4578  | 12.0357  | -1.7994 | Down | 1.12E-53  | 1.18E-52  |
| Unigene96512  | Potri.003G101000.1  | 1.2122  | 4.2194   | -1.7994 | Down | 2.25E-05  | 4.59E-05  |
| Unigene21619  | Potri.002G070300.1  | 4.8917  | 17.0268  | -1.7994 | Down | 1.13E-33  | 7.59E-33  |
| Unigene18982  | Potri.001G424500.1  | 5.051   | 17.581   | -1.7994 | Down | 1.25E-21  | 5.85E-21  |
| Unigene32771  | Potri.006G100200.1  | 5.6703  | 19.7395  | -1.7996 | Down | 6.35E-55  | 6.85E-54  |
| Unigene54096  | Potri.006G020700.6  | 6.4468  | 22.4491  | -1.8    | Down | 7.36E-19  | 3.14E-18  |
| Unigene26137  | Potri.003G153600.2  | 5.9005  | 20.5467  | -1.8    | Down | 7.36E-19  | 3.14E-18  |
| Unigene47752  | Potri.001G249000.1  | 8.7032  | 30.3063  | -1.8    | Down | 7.36E-19  | 3.14E-18  |
| Unigene33799  | Potri.006G199000.2  | 6.6177  | 23.0453  | -1.8001 | Down | 3.67E-32  | 2.37E-31  |
| Unigene34623  | Potri.006G106500.1  | 8.1459  | 28.3683  | -1.8001 | Down | 6.95E-72  | 1.01E-70  |
| Unigene86294  | Potri.014G013100.4  | 5.3463  | 18.6191  | -1.8002 | Down | 8.00E-15  | 2.89E-14  |
| Unigene69899  | Potri.014G172400.1  | 27.199  | 94.7375  | -1.8004 | Down | 1.86E-128 | 5.43E-127 |
| Unigene11699  | Potri.012G075500.2  | 7.4159  | 25.8309  | -1.8004 | Down | 2.26E-74  | 3.40E-73  |
| Unigene13141  | Potri.010G035300.1  | 1.8869  | 6.5722   | -1.8004 | Down | 3.89E-24  | 1.98E-23  |
| Unigene22336  | Potri.T009000.1     | 9.2224  | 32.1261  | -1.8005 | Down | 1.66E-112 | 4.12E-111 |
| Unigene77226  | Potri.010G160500.1  | 4.8652  | 16.9477  | -1.8005 | Down | 9.10E-11  | 2.71E-10  |
| Unigene43000  | Potri.008G156200.3  | 1.4291  | 4.9782   | -1.8005 | Down | 9.10E-11  | 2.71E-10  |
| Unigene3138   | Potri.017G001300.2  | 5.0878  | 17.7256  | -1.8007 | Down | 3.70E-49  | 3.55E-48  |
| Unigene33198  | Potri.005G070700.1  | 5.3885  | 18.7732  | -1.8007 | Down | 2.18E-25  | 1.15E-24  |
| Unigene42101  | Potri.002G133700.2  | 11.0464 | 38.4851  | -1.8007 | Down | 2.18E-25  | 1.15E-24  |
| Unigene29443  | Potri.015G140900.1  | 4.7993  | 16.7212  | -1.8008 | Down | 2.11E-54  | 2.25E-53  |
| Unigene76278  | Potri.005G224900.1  | 20.5562 | 71.619   | -1.8008 | Down | 6.54E-40  | 5.11E-39  |
| Unigene55208  | Potri.002G045400.1  | 5.4613  | 19.0285  | -1.8008 | Down | 4.41E-16  | 1.68E-15  |
| Unigene27933  | Potri.002G131200.1  | 20.5148 | 71.4833  | -1.8009 | Down | 8.15E-90  | 1.52E-88  |
| Unigene40729  | Potri.002G082700.1  | 32.0847 | 111.7949 | -1.8009 | Down | 1.73E-113 | 4.34E-112 |

|               |                    |         |          |         |      |           |           |
|---------------|--------------------|---------|----------|---------|------|-----------|-----------|
| Unigene25276  | Potri.018G128000.3 | 10.2016 | 35.5485  | -1.801  | Down | 2.28E-21  | 1.06E-20  |
| Unigene42591  | Potri.018G019100.1 | 5.6855  | 19.8121  | -1.801  | Down | 9.24E-170 | 3.89E-168 |
| Unigene36087  | Potri.009G082400.5 | 25.5849 | 89.1546  | -1.801  | Down | 7.97E-86  | 1.42E-84  |
| Unigene41369  | Potri.007G133700.1 | 2.5477  | 8.8776   | -1.801  | Down | 2.28E-21  | 1.06E-20  |
| Unigene72271  | Potri.002G192800.4 | 11.5882 | 40.3803  | -1.801  | Down | 2.28E-21  | 1.06E-20  |
| Unigene78480  | Potri.012G118500.1 | 15.4234 | 53.7498  | -1.8011 | Down | 6.70E-32  | 4.29E-31  |
| Unigene26711  | Potri.001G267400.4 | 10.3551 | 36.087   | -1.8011 | Down | 3.93E-62  | 4.86E-61  |
| Unigene26345  | Potri.019G014200.3 | 1.499   | 5.225    | -1.8014 | Down | 1.14E-06  | 2.60E-06  |
| Unigene75396  | Potri.018G121200.1 | 2.8822  | 10.0463  | -1.8014 | Down | 1.14E-06  | 2.60E-06  |
| Unigene119323 | Potri.010G125600.1 | 0.9257  | 3.2265   | -1.8014 | Down | 1.14E-06  | 2.60E-06  |
| Unigene103329 | Potri.009G004100.1 | 1.7663  | 6.1565   | -1.8014 | Down | 1.14E-06  | 2.60E-06  |
| Unigene29879  | Potri.008G055700.2 | 2.4388  | 8.5007   | -1.8014 | Down | 4.93E-12  | 1.57E-11  |
| Unigene53250  | Potri.004G211500.3 | 4.5783  | 15.958   | -1.8014 | Down | 4.93E-12  | 1.57E-11  |
| Unigene30110  | Potri.002G110700.1 | 1.461   | 5.0926   | -1.8014 | Down | 1.14E-06  | 2.60E-06  |
| Unigene2874   | Potri.007G010900.1 | 8.4757  | 29.549   | -1.8017 | Down | 4.64E-84  | 8.03E-83  |
| Unigene37404  | Potri.006G191500.4 | 21.2298 | 74.017   | -1.8018 | Down | 3.82E-46  | 3.44E-45  |
| Unigene12645  | Potri.005G183000.1 | 10.1219 | 35.2909  | -1.8018 | Down | 6.76E-41  | 5.41E-40  |
| Unigene34280  | Potri.017G035700.1 | 3.3142  | 11.5557  | -1.8019 | Down | 1.35E-18  | 5.70E-18  |
| Unigene72599  | Potri.010G217100.1 | 79.2841 | 276.4432 | -1.8019 | Down | 2.37E-137 | 7.57E-136 |
| Unigene1379   | Potri.008G183800.3 | 3.1923  | 11.1324  | -1.8021 | Down | 2.69E-13  | 9.08E-13  |
| Unigene45243  | Potri.008G167800.2 | 7.2035  | 25.124   | -1.8023 | Down | 3.85E-38  | 2.89E-37  |
| Unigene21727  | Potri.002G134900.1 | 3.4296  | 11.9616  | -1.8023 | Down | 2.27E-56  | 2.53E-55  |
| Unigene33793  | Potri.006G173300.1 | 6.4869  | 22.626   | -1.8024 | Down | 2.24E-26  | 1.22E-25  |
| Unigene36487  | Potri.019G021500.1 | 2.8692  | 10.0095  | -1.8026 | Down | 5.93E-08  | 1.49E-07  |
| Unigene17618  | Potri.012G064200.1 | 2.1638  | 7.5486   | -1.8026 | Down | 5.93E-08  | 1.49E-07  |
| Unigene34293  | Potri.002G174400.2 | 8.7194  | 30.4185  | -1.8026 | Down | 1.23E-40  | 9.82E-40  |
| Unigene43727  | Potri.002G129000.1 | 2.1431  | 7.4763   | -1.8026 | Down | 1.47E-14  | 5.26E-14  |
| Unigene66458  | Potri.001G372000.1 | 3.2301  | 11.2684  | -1.8026 | Down | 1.47E-14  | 5.26E-14  |
| Unigene119200 | Potri.001G287900.6 | 1.2634  | 4.4074   | -1.8026 | Down | 5.93E-08  | 1.49E-07  |
| Unigene87286  | Potri.010G154000.1 | 27.9153 | 97.3915  | -1.8027 | Down | 2.59E-74  | 3.90E-73  |
| Unigene37289  | Potri.001G107500.1 | 32.8482 | 114.6023 | -1.8027 | Down | 7.85E-68  | 1.07E-66  |
| Unigene18346  | Potri.001G164900.1 | 4.6624  | 16.2668  | -1.8028 | Down | 7.29E-55  | 7.85E-54  |
| Unigene49640  | Potri.005G087500.1 | 10.8829 | 37.9805  | -1.8032 | Down | 7.03E-38  | 5.25E-37  |
| Unigene24963  | Potri.005G035000.1 | 12.9817 | 45.3068  | -1.8032 | Down | 1.27E-45  | 1.13E-44  |
| Unigene2130   | Potri.014G169900.1 | 7.6164  | 26.5841  | -1.8034 | Down | 7.22E-47  | 6.60E-46  |
| Unigene26181  | Potri.018G134200.3 | 1.3876  | 4.8438   | -1.8035 | Down | 3.14E-09  | 8.55E-09  |
| Unigene49283  | Potri.018G021100.2 | 5.7919  | 20.2174  | -1.8035 | Down | 4.47E-17  | 1.78E-16  |
| Unigene106994 | Potri.015G033300.2 | 1.1161  | 3.8959   | -1.8035 | Down | 4.47E-17  | 1.78E-16  |
| Unigene36173  | Potri.008G017800.1 | 8.1086  | 28.3044  | -1.8035 | Down | 4.47E-17  | 1.78E-16  |

|               |                    |         |          |         |      |           |           |
|---------------|--------------------|---------|----------|---------|------|-----------|-----------|
| Unigene8131   | Potri.002G154000.1 | 2.001   | 6.985    | -1.8035 | Down | 3.14E-09  | 8.55E-09  |
| Unigene98086  | Potri.001G271700.3 | 4.3372  | 15.1395  | -1.8035 | Down | 3.14E-09  | 8.55E-09  |
| Unigene88641  | Potri.011G118000.2 | 14.2779 | 49.844   | -1.8036 | Down | 1.28E-41  | 1.04E-40  |
| Unigene79262  | Potri.009G055400.1 | 12.2268 | 42.6864  | -1.8037 | Down | 4.09E-26  | 2.22E-25  |
| Unigene118102 | Potri.015G067600.1 | 4.9488  | 17.2787  | -1.8038 | Down | 2.48E-18  | 1.04E-17  |
| Unigene15221  | Potri.005G094600.3 | 46.907  | 163.7852 | -1.8039 | Down | 2.07E-104 | 4.66E-103 |
| Unigene70152  | Potri.004G197400.1 | 16.3227 | 56.9938  | -1.8039 | Down | 9.13E-79  | 1.47E-77  |
| Unigene118432 | Potri.014G067700.1 | 2.4528  | 8.5656   | -1.8041 | Down | 1.68E-10  | 4.93E-10  |
| Unigene2747   | Potri.011G075400.1 | 30.4388 | 106.293  | -1.8041 | Down | 3.53E-99  | 7.51E-98  |
| Unigene65357  | Potri.009G160100.1 | 3.5349  | 12.3445  | -1.8041 | Down | 1.68E-10  | 4.93E-10  |
| Unigene7208   | Potri.006G238100.1 | 1.8554  | 6.4793   | -1.8041 | Down | 1.68E-10  | 4.93E-10  |
| Unigene37221  | Potri.018G080400.1 | 9.6357  | 33.6551  | -1.8044 | Down | 7.66E-21  | 3.50E-20  |
| Unigene564    | Potri.013G053500.1 | 2.0966  | 7.323    | -1.8044 | Down | 7.66E-21  | 3.50E-20  |
| Unigene22588  | Potri.015G042200.1 | 2.3356  | 8.159    | -1.8046 | Down | 9.08E-12  | 2.85E-11  |
| Unigene74103  | Potri.010G014000.1 | 11.5036 | 40.1852  | -1.8046 | Down | 4.27E-22  | 2.03E-21  |
| Unigene46673  | Potri.015G035800.1 | 12.8619 | 44.9362  | -1.8048 | Down | 2.39E-23  | 1.19E-22  |
| Unigene46353  | Potri.005G148100.1 | 12.0531 | 42.1155  | -1.8049 | Down | 1.34E-24  | 6.90E-24  |
| Unigene25362  | Potri.008G044700.1 | 2.2811  | 7.9706   | -1.805  | Down | 4.94E-13  | 1.65E-12  |
| Unigene53276  | Potri.001G371600.1 | 15.0974 | 52.7602  | -1.8051 | Down | 1.33E-38  | 1.01E-37  |
| Unigene41859  | Potri.018G048700.1 | 5.612   | 19.6133  | -1.8052 | Down | 1.42E-52  | 1.46E-51  |
| Unigene33264  | Potri.013G007000.1 | 7.7629  | 27.1301  | -1.8052 | Down | 4.20E-27  | 2.34E-26  |
| Unigene7591   | Potri.009G042400.3 | 47.2949 | 165.2934 | -1.8053 | Down | 0         | 0         |
| Unigene76354  | Potri.012G043900.1 | 92.3371 | 322.7319 | -1.8054 | Down | 3.14E-174 | 1.36E-172 |
| Unigene5588   | Potri.009G123100.1 | 11.2949 | 39.4777  | -1.8054 | Down | 2.36E-28  | 1.37E-27  |
| Unigene50267  | Potri.018G062700.2 | 7.1425  | 24.9661  | -1.8055 | Down | 1.36E-43  | 1.16E-42  |
| Unigene98545  | Potri.016G020000.1 | 5.7482  | 20.0926  | -1.8055 | Down | 1.49E-15  | 5.55E-15  |
| Unigene42939  | Potri.001G005100.1 | 14.2936 | 49.9626  | -1.8055 | Down | 2.22E-99  | 4.74E-98  |
| Unigene44736  | Potri.016G008700.2 | 3.3046  | 11.5518  | -1.8056 | Down | 7.48E-31  | 4.65E-30  |
| Unigene34237  | Potri.008G003500.1 | 3.864   | 13.5083  | -1.8057 | Down | 8.20E-17  | 3.23E-16  |
| Unigene5592   | Potri.005G161100.1 | 4.9264  | 17.2222  | -1.8057 | Down | 8.20E-17  | 3.23E-16  |
| Unigene49845  | Potri.006G116200.1 | 5.5687  | 19.47    | -1.8058 | Down | 1.34E-34  | 9.19E-34  |
| Unigene15248  | Potri.010G142700.1 | 3.5813  | 12.5215  | -1.8059 | Down | 4.54E-18  | 1.88E-17  |
| Unigene15888  | Potri.009G087000.3 | 9.2377  | 32.2984  | -1.8059 | Down | 4.54E-18  | 1.88E-17  |
| Unigene21057  | Potri.003G196200.3 | 20.8825 | 73.0126  | -1.8059 | Down | 4.56E-51  | 4.54E-50  |
| Unigene16559  | Potri.014G172200.1 | 23.8885 | 83.531   | -1.806  | Down | 1.73E-72  | 2.53E-71  |
| Unigene22016  | Potri.007G128000.3 | 13.1732 | 46.0617  | -1.806  | Down | 2.77E-279 | 2.21E-277 |
| Unigene32465  | Potri.006G140700.1 | 32.2132 | 112.6403 | -1.806  | Down | 4.00E-143 | 1.34E-141 |
| Unigene15576  | Potri.005G070700.5 | 14.9724 | 52.354   | -1.806  | Down | 4.28E-37  | 3.13E-36  |
| Unigene33819  | Potri.004G036800.4 | 11.7823 | 41.2007  | -1.806  | Down | 4.76E-56  | 5.25E-55  |

|               |                    |         |          |         |      |           |           |
|---------------|--------------------|---------|----------|---------|------|-----------|-----------|
| Unigene51263  | Potri.001G294400.1 | 22.746  | 79.5397  | -1.8061 | Down | 5.64E-75  | 8.57E-74  |
| Unigene19864  | Potri.018G047700.8 | 42.3933 | 148.2604 | -1.8062 | Down | 9.40E-162 | 3.72E-160 |
| Unigene28360  | Potri.001G137200.2 | 56.2751 | 196.8022 | -1.8062 | Down | 6.37E-216 | 3.61E-214 |
| Unigene26980  | Potri.001G184100.5 | 11.0464 | 38.6396  | -1.8065 | Down | 1.37E-25  | 7.30E-25  |
| Unigene15150  | Potri.010G073600.3 | 8.6625  | 30.3036  | -1.8066 | Down | 4.32E-28  | 2.48E-27  |
| Unigene42433  | Potri.001G155200.1 | 7.1992  | 25.1854  | -1.8067 | Down | 8.77E-110 | 2.11E-108 |
| Unigene46014  | Potri.004G042200.1 | 22.4404 | 78.5191  | -1.8069 | Down | 1.01E-70  | 1.43E-69  |
| Unigene22156  | Potri.008G167800.2 | 6.5118  | 22.7866  | -1.8071 | Down | 1.42E-40  | 1.12E-39  |
| Unigene26850  | Potri.016G018500.3 | 19.2646 | 67.4169  | -1.8072 | Down | 1.46E-45  | 1.30E-44  |
| Unigene69995  | Potri.012G080800.5 | 24.537  | 85.8704  | -1.8072 | Down | 2.39E-94  | 4.74E-93  |
| Unigene3204   | Potri.012G057500.1 | 21.1441 | 73.9958  | -1.8072 | Down | 5.13E-228 | 3.11E-226 |
| Unigene10672  | Potri.008G177900.2 | 7.2143  | 25.2467  | -1.8072 | Down | 7.43E-177 | 3.30E-175 |
| Unigene43246  | Potri.015G100700.1 | 9.1543  | 32.0379  | -1.8073 | Down | 8.61E-52  | 8.73E-51  |
| Unigene32673  | Potri.013G107800.1 | 5.9071  | 20.6738  | -1.8073 | Down | 1.56E-105 | 3.55E-104 |
| Unigene40641  | Potri.008G142500.1 | 25.6213 | 89.6732  | -1.8073 | Down | 3.11E-114 | 7.88E-113 |
| Unigene48106  | Potri.004G217800.1 | 13.223  | 46.2789  | -1.8073 | Down | 1.58E-55  | 1.73E-54  |
| Unigene23422  | Potri.001G292700.6 | 12.6374 | 44.2285  | -1.8073 | Down | 4.89E-53  | 5.08E-52  |
| Unigene47949  | Potri.016G020100.1 | 21.8812 | 76.5906  | -1.8075 | Down | 1.95E-75  | 2.98E-74  |
| Unigene32393  | Potri.018G107000.1 | 9.3774  | 32.8343  | -1.8079 | Down | 3.99E-85  | 7.02E-84  |
| Unigene5618   | Potri.018G020200.5 | 1.2503  | 4.3777   | -1.8079 | Down | 4.22E-05  | 8.40E-05  |
| Unigene20078  | Potri.016G101000.1 | 1.2687  | 4.4422   | -1.8079 | Down | 1.10E-07  | 2.72E-07  |
| Unigene3549   | Potri.016G094700.4 | 4.3668  | 15.29    | -1.8079 | Down | 1.51E-16  | 5.86E-16  |
| Unigene27215  | Potri.015G106000.3 | 2.8555  | 9.9982   | -1.8079 | Down | 2.13E-06  | 4.76E-06  |
| Unigene42231  | Potri.012G060800.2 | 2.2022  | 7.7108   | -1.8079 | Down | 2.13E-06  | 4.76E-06  |
| Unigene102758 | Potri.010G102100.3 | 4.9568  | 17.3557  | -1.8079 | Down | 4.97E-14  | 1.74E-13  |
| Unigene52468  | Potri.008G091900.1 | 5.3974  | 18.8985  | -1.8079 | Down | 4.62E-19  | 1.99E-18  |
| Unigene68571  | Potri.007G025300.1 | 1.3466  | 4.7149   | -1.8079 | Down | 1.10E-07  | 2.72E-07  |
| Unigene37763  | Potri.006G265100.1 | 12.8679 | 45.0561  | -1.8079 | Down | 8.58E-48  | 8.01E-47  |
| Unigene61737  | Potri.005G176600.2 | 1.7003  | 5.9534   | -1.8079 | Down | 2.13E-06  | 4.76E-06  |
| Unigene42610  | Potri.005G080600.1 | 8.0007  | 28.0139  | -1.8079 | Down | 5.88E-69  | 8.13E-68  |
| Unigene40027  | Potri.004G141700.4 | 1.6026  | 5.6113   | -1.8079 | Down | 4.97E-14  | 1.74E-13  |
| Unigene52450  | Potri.004G134300.1 | 0.9306  | 3.2583   | -1.8079 | Down | 4.22E-05  | 8.40E-05  |
| Unigene10650  | Potri.003G173700.1 | 7.9643  | 27.8865  | -1.8079 | Down | 4.52E-95  | 9.06E-94  |
| Unigene101856 | Potri.003G146500.1 | 2.6301  | 9.2091   | -1.8079 | Down | 2.73E-15  | 1.01E-14  |
| Unigene22678  | Potri.003G074000.1 | 5.6809  | 19.8913  | -1.8079 | Down | 2.50E-25  | 1.32E-24  |
| Unigene30284  | Potri.002G057600.1 | 1.2974  | 4.5427   | -1.8079 | Down | 4.22E-05  | 8.40E-05  |
| Unigene7930   | Potri.001G385600.1 | 16.4334 | 57.5406  | -1.8079 | Down | 4.87E-49  | 4.66E-48  |
| Unigene102747 | Potri.001G213700.1 | 0.9969  | 3.4905   | -1.8079 | Down | 4.22E-05  | 8.41E-05  |
| Unigene98445  | Potri.001G102900.7 | 6.5823  | 23.0474  | -1.8079 | Down | 9.09E-13  | 3.00E-12  |

|               |                    |          |          |         |      |           |           |
|---------------|--------------------|----------|----------|---------|------|-----------|-----------|
| Unigene104378 | Potri.019G104600.1 | 1.3351   | 4.6748   | -1.808  | Down | 2.13E-06  | 4.76E-06  |
| Unigene51469  | Potri.016G105700.1 | 10.7208  | 37.5383  | -1.808  | Down | 1.41E-31  | 8.93E-31  |
| Unigene51933  | Potri.014G042800.1 | 8.0106   | 28.0487  | -1.808  | Down | 1.43E-21  | 6.72E-21  |
| Unigene118795 | Potri.010G113700.1 | 1.2105   | 4.2386   | -1.808  | Down | 2.13E-06  | 4.76E-06  |
| Unigene104071 | Potri.010G108500.2 | 2.4516   | 8.5842   | -1.808  | Down | 3.10E-10  | 8.97E-10  |
| Unigene107382 | Potri.010G026800.4 | 12.6818  | 44.4047  | -1.808  | Down | 7.99E-23  | 3.90E-22  |
| Unigene52930  | Potri.008G156800.1 | 1.3116   | 4.5926   | -1.808  | Down | 2.13E-06  | 4.76E-06  |
| Unigene26033  | Potri.006G237500.1 | 1.1506   | 4.0289   | -1.808  | Down | 4.22E-05  | 8.40E-05  |
| Unigene3756   | Potri.005G198700.2 | 0.9794   | 3.4294   | -1.808  | Down | 4.22E-05  | 8.40E-05  |
| Unigene93620  | Potri.016G023800.2 | 112.3894 | 393.6564 | -1.8084 | Down | 0         | 0         |
| Unigene26178  | Potri.005G153800.1 | 18.6917  | 65.4703  | -1.8084 | Down | 3.48E-71  | 4.98E-70  |
| Unigene82396  | Potri.011G115100.2 | 78.4577  | 274.8299 | -1.8086 | Down | 1.50E-172 | 6.42E-171 |
| Unigene5437   | Potri.017G050500.1 | 16.744   | 58.6645  | -1.8088 | Down | 4.71E-40  | 3.70E-39  |
| Unigene26222  | Potri.010G125100.3 | 20.1576  | 70.6234  | -1.8088 | Down | 2.67E-41  | 2.16E-40  |
| Unigene7410   | Potri.006G159900.1 | 25.6342  | 89.8163  | -1.8089 | Down | 3.33E-109 | 7.95E-108 |
| Unigene29072  | Potri.001G443200.3 | 4.8457   | 16.9778  | -1.8089 | Down | 8.33E-39  | 6.35E-38  |
| Unigene43275  | Potri.007G053200.2 | 14.461   | 50.6716  | -1.809  | Down | 2.63E-131 | 7.91E-130 |
| Unigene76451  | Potri.017G112900.1 | 15.0188  | 52.632   | -1.8092 | Down | 4.56E-30  | 2.77E-29  |
| Unigene70845  | Potri.001G072000.1 | 33.7737  | 118.3564 | -1.8092 | Down | 1.76E-58  | 2.04E-57  |
| Unigene17821  | Potri.009G046300.1 | 6.2796   | 22.0081  | -1.8093 | Down | 1.44E-27  | 8.16E-27  |
| Unigene32762  | Potri.003G133000.1 | 7.9077   | 27.7139  | -1.8093 | Down | 1.69E-53  | 1.77E-52  |
| Unigene23071  | Potri.009G113700.1 | 7.8802   | 27.6203  | -1.8094 | Down | 4.58E-25  | 2.40E-24  |
| Unigene8660   | Potri.019G001100.3 | 8.5292   | 29.8989  | -1.8096 | Down | 1.46E-22  | 7.08E-22  |
| Unigene36902  | Potri.018G093400.6 | 8.2732   | 29.0059  | -1.8098 | Down | 4.71E-20  | 2.10E-19  |
| Unigene7914   | Potri.001G193300.1 | 3.5402   | 12.4117  | -1.8098 | Down | 3.22E-58  | 3.70E-57  |
| Unigene73740  | Potri.006G052400.2 | 29.7341  | 104.2541 | -1.8099 | Down | 1.75E-54  | 1.87E-53  |
| Unigene25564  | Potri.001G294400.1 | 5.4507   | 19.1139  | -1.8101 | Down | 1.53E-17  | 6.20E-17  |
| Unigene83857  | Potri.010G219600.3 | 19.8111  | 69.4777  | -1.8102 | Down | 5.21E-47  | 4.78E-46  |
| Unigene5919   | Potri.014G164300.4 | 10.222   | 35.8504  | -1.8103 | Down | 4.69E-31  | 2.93E-30  |
| Unigene31666  | Potri.010G076600.6 | 8.2888   | 29.0701  | -1.8103 | Down | 4.69E-31  | 2.93E-30  |
| Unigene7480   | Potri.010G253100.3 | 7.3494   | 25.7781  | -1.8104 | Down | 2.85E-43  | 2.41E-42  |
| Unigene44198  | Potri.T012200.2    | 2.0406   | 7.1577   | -1.8105 | Down | 5.01E-15  | 1.83E-14  |
| Unigene39540  | Potri.012G065100.1 | 3.7872   | 13.2844  | -1.8105 | Down | 1.81E-55  | 1.98E-54  |
| Unigene10836  | Potri.001G022700.1 | 6.7586   | 23.706   | -1.8105 | Down | 2.85E-43  | 2.41E-42  |
| Unigene107413 | Potri.014G055800.1 | 7.2734   | 25.5176  | -1.8108 | Down | 9.14E-14  | 3.16E-13  |
| Unigene23157  | Potri.010G118300.1 | 1.8507   | 6.493    | -1.8108 | Down | 9.14E-14  | 3.15E-13  |
| Unigene10472  | Potri.010G027800.2 | 4.3038   | 15.0992  | -1.8108 | Down | 9.14E-14  | 3.16E-13  |
| Unigene44310  | Potri.001G074000.1 | 1.9552   | 6.8596   | -1.8108 | Down | 9.14E-14  | 3.15E-13  |
| Unigene16392  | Potri.005G116400.2 | 20.1472  | 70.6908  | -1.8109 | Down | 5.39E-48  | 5.05E-47  |

|               |                    |         |          |         |      |           |           |
|---------------|--------------------|---------|----------|---------|------|-----------|-----------|
| Unigene79965  | Potri.005G093100.2 | 46.2819 | 162.381  | -1.8109 | Down | 1.02E-96  | 2.10E-95  |
| Unigene73713  | Potri.005G055900.1 | 13.0197 | 45.6822  | -1.8109 | Down | 8.38E-25  | 4.36E-24  |
| Unigene31736  | Potri.006G132300.1 | 17.9963 | 63.1482  | -1.811  | Down | 1.07E-57  | 1.22E-56  |
| Unigene12901  | Potri.008G136500.1 | 3.3403  | 11.723   | -1.8113 | Down | 2.68E-22  | 1.28E-21  |
| Unigene39650  | Potri.009G090300.2 | 6.8498  | 24.0419  | -1.8114 | Down | 9.19E-42  | 7.51E-41  |
| Unigene6890   | Potri.005G194500.2 | 69.1971 | 242.8664 | -1.8114 | Down | 9.91E-254 | 6.97E-252 |
| Unigene23152  | Potri.011G034400.1 | 2.8202  | 9.8993   | -1.8115 | Down | 3.08E-11  | 9.42E-11  |
| Unigene11291  | Potri.008G142600.1 | 4.0628  | 14.2611  | -1.8115 | Down | 3.17E-50  | 3.11E-49  |
| Unigene44519  | Potri.006G021300.1 | 1.6172  | 5.6765   | -1.8115 | Down | 3.08E-11  | 9.42E-11  |
| Unigene47471  | Potri.005G084900.4 | 8.3186  | 29.1993  | -1.8115 | Down | 4.80E-21  | 2.21E-20  |
| Unigene52222  | Potri.002G111300.1 | 3.7911  | 13.3072  | -1.8115 | Down | 3.08E-11  | 9.42E-11  |
| Unigene3797   | Potri.001G275400.4 | 10.5117 | 36.8973  | -1.8115 | Down | 8.58E-31  | 5.32E-30  |
| Unigene47406  | Potri.006G132300.1 | 19.8235 | 69.5982  | -1.8118 | Down | 4.31E-73  | 6.35E-72  |
| Unigene35191  | Potri.018G097300.1 | 15.8842 | 55.7703  | -1.8119 | Down | 8.96E-37  | 6.51E-36  |
| Unigene14078  | Potri.005G241800.1 | 5.429   | 19.0636  | -1.8121 | Down | 1.55E-18  | 6.54E-18  |
| Unigene34612  | Potri.003G023300.1 | 21.314  | 74.8423  | -1.8121 | Down | 2.32E-69  | 3.23E-68  |
| Unigene36947  | Potri.011G126800.1 | 9.0423  | 31.7547  | -1.8122 | Down | 2.81E-34  | 1.91E-33  |
| Unigene28603  | Potri.010G250800.2 | 7.0011  | 24.5884  | -1.8123 | Down | 3.55E-57  | 4.01E-56  |
| Unigene27008  | Potri.005G257700.1 | 17.2683 | 60.6499  | -1.8124 | Down | 2.20E-64  | 2.83E-63  |
| Unigene63890  | Potri.001G326700.3 | 6.1959  | 21.7614  | -1.8124 | Down | 2.80E-17  | 1.12E-16  |
| Unigene48310  | Potri.006G184500.1 | 27.7844 | 97.5926  | -1.8125 | Down | 2.41E-70  | 3.41E-69  |
| Unigene38073  | Potri.001G101600.1 | 15.6843 | 55.0949  | -1.8126 | Down | 5.23E-39  | 4.01E-38  |
| Unigene100220 | Potri.006G109000.1 | 2.1774  | 7.6495   | -1.8128 | Down | 1.07E-08  | 2.84E-08  |
| Unigene72997  | Potri.004G168500.3 | 36.9426 | 129.7848 | -1.8128 | Down | 1.30E-66  | 1.74E-65  |
| Unigene33048  | Potri.003G146300.2 | 4.7793  | 16.7905  | -1.8128 | Down | 1.57E-30  | 9.65E-30  |
| Unigene42430  | Potri.001G165900.1 | 7.9461  | 27.9162  | -1.8128 | Down | 3.48E-245 | 2.34E-243 |
| Unigene41099  | Potri.010G097000.1 | 4.8693  | 17.1096  | -1.813  | Down | 1.05E-49  | 1.02E-48  |
| Unigene50822  | Potri.001G345500.1 | 6.458   | 22.6936  | -1.8131 | Down | 2.90E-35  | 2.02E-34  |
| Unigene54155  | Potri.014G145600.1 | 12.1818 | 42.8101  | -1.8132 | Down | 1.35E-67  | 1.83E-66  |
| Unigene15426  | Potri.006G142800.1 | 14.5054 | 50.9757  | -1.8132 | Down | 4.95E-28  | 2.84E-27  |
| Unigene10150  | Potri.001G309800.1 | 4.1554  | 14.6031  | -1.8132 | Down | 9.21E-15  | 3.32E-14  |
| Unigene30871  | Potri.015G108500.1 | 54.5399 | 191.6742 | -1.8133 | Down | 3.04E-262 | 2.24E-260 |
| Unigene3559   | Potri.013G144000.1 | 25.6434 | 90.1212  | -1.8133 | Down | 2.18E-60  | 2.60E-59  |
| Unigene34580  | Potri.017G115300.1 | 4.4396  | 15.6036  | -1.8134 | Down | 5.40E-40  | 4.23E-39  |
| Unigene81232  | Potri.015G010600.5 | 26.3898 | 92.7595  | -1.8135 | Down | 6.72E-58  | 7.68E-57  |
| Unigene8860   | Potri.T104000.1    | 1.5962  | 5.6114   | -1.8137 | Down | 2.04E-07  | 4.96E-07  |
| Unigene68071  | Potri.002G250400.2 | 1.9232  | 6.7611   | -1.8137 | Down | 1.68E-13  | 5.73E-13  |
| Unigene94980  | Potri.017G076400.1 | 6.7926  | 23.88    | -1.8138 | Down | 1.58E-19  | 6.91E-19  |
| Unigene16663  | Potri.015G101900.1 | 5.3486  | 18.8036  | -1.8138 | Down | 1.68E-13  | 5.73E-13  |



|               |                    |          |          |         |      |           |           |
|---------------|--------------------|----------|----------|---------|------|-----------|-----------|
| Unigene26632  | Potri.014G121800.1 | 2.7469   | 9.6569   | -1.8138 | Down | 2.04E-07  | 4.96E-07  |
| Unigene118728 | Potri.010G019400.1 | 1.4795   | 5.2014   | -1.8138 | Down | 2.04E-07  | 4.96E-07  |
| Unigene57676  | Potri.006G083900.1 | 6.6078   | 23.2306  | -1.8138 | Down | 1.57E-25  | 8.35E-25  |
| Unigene29666  | Potri.001G452300.1 | 1.3346   | 4.6921   | -1.8138 | Down | 2.04E-07  | 4.96E-07  |
| Unigene12536  | Potri.001G383800.3 | 5.6695   | 19.9319  | -1.8138 | Down | 1.61E-31  | 1.02E-30  |
| Unigene29618  | Potri.001G370700.1 | 3.1497   | 11.0733  | -1.8138 | Down | 1.68E-13  | 5.73E-13  |
| Unigene20538  | Potri.001G302000.1 | 10.7082  | 37.646   | -1.8138 | Down | 2.47E-67  | 3.33E-66  |
| Unigene51580  | Potri.007G077900.1 | 6.2747   | 22.0643  | -1.8141 | Down | 2.80E-24  | 1.44E-23  |
| Unigene41117  | Potri.005G123200.1 | 15.8441  | 55.714   | -1.8141 | Down | 5.96E-47  | 5.46E-46  |
| Unigene1133   | Potri.005G020900.3 | 7.3163   | 25.7263  | -1.8141 | Down | 6.42E-53  | 6.66E-52  |
| Unigene39042  | Potri.014G075200.1 | 30.463   | 107.1244 | -1.8142 | Down | 7.36E-97  | 1.51E-95  |
| Unigene84737  | Potri.003G082100.1 | 32.6537  | 114.8353 | -1.8142 | Down | 5.43E-79  | 8.78E-78  |
| Unigene33660  | Potri.009G139500.3 | 10.2997  | 36.2222  | -1.8143 | Down | 1.05E-45  | 9.37E-45  |
| Unigene13319  | Potri.006G240900.3 | 4.3793   | 15.4016  | -1.8143 | Down | 5.09E-29  | 3.01E-28  |
| Unigene38354  | Potri.005G097600.1 | 2.3749   | 8.3531   | -1.8144 | Down | 3.08E-12  | 9.90E-12  |
| Unigene48279  | Potri.016G030900.1 | 8.6862   | 30.5518  | -1.8145 | Down | 5.01E-23  | 2.46E-22  |
| Unigene74638  | Potri.014G180100.1 | 5.8442   | 20.5556  | -1.8145 | Down | 3.08E-12  | 9.90E-12  |
| Unigene86921  | Potri.002G146800.1 | 4.1175   | 14.4823  | -1.8145 | Down | 3.08E-12  | 9.90E-12  |
| Unigene33612  | Potri.006G257100.3 | 10.1726  | 35.7865  | -1.8147 | Down | 6.17E-48  | 5.78E-47  |
| Unigene7702   | Potri.003G079700.1 | 3.1242   | 10.9908  | -1.8147 | Down | 5.14E-17  | 2.04E-16  |
| Unigene78329  | Potri.019G041900.1 | 17.8595  | 62.832   | -1.8148 | Down | 3.08E-37  | 2.26E-36  |
| Unigene18813  | Potri.010G241200.1 | 27.7293  | 97.5549  | -1.8148 | Down | 8.98E-73  | 1.32E-71  |
| Unigene20702  | Potri.018G058000.1 | 9.3983   | 33.0658  | -1.8149 | Down | 8.98E-22  | 4.24E-21  |
| Unigene22687  | Potri.013G098900.1 | 3.8073   | 13.3951  | -1.8149 | Down | 8.98E-22  | 4.24E-21  |
| Unigene86276  | Potri.008G108000.1 | 113.1461 | 398.0889 | -1.8149 | Down | 2.27E-286 | 1.90E-284 |
| Unigene30556  | Potri.008G162600.1 | 13.2137  | 46.4923  | -1.815  | Down | 1.61E-26  | 8.84E-26  |
| Unigene26678  | Potri.003G043500.2 | 24.2686  | 85.3936  | -1.815  | Down | 1.44E-65  | 1.89E-64  |
| Unigene112760 | Potri.018G132700.1 | 2.2744   | 8.0044   | -1.8153 | Down | 3.97E-06  | 8.68E-06  |
| Unigene49688  | Potri.013G154500.3 | 13.5988  | 47.8595  | -1.8153 | Down | 8.50E-68  | 1.15E-66  |
| Unigene31843  | Potri.010G253700.1 | 5.8545   | 20.6042  | -1.8153 | Down | 3.56E-143 | 1.20E-141 |
| Unigene25306  | Potri.010G161800.1 | 1.1804   | 4.1542   | -1.8153 | Down | 3.97E-06  | 8.68E-06  |
| Unigene51396  | Potri.009G153300.1 | 2.0345   | 7.1603   | -1.8153 | Down | 3.97E-06  | 8.68E-06  |
| Unigene103224 | Potri.008G083500.2 | 0.9325   | 3.2818   | -1.8153 | Down | 3.97E-06  | 8.68E-06  |
| Unigene53793  | Potri.008G067600.2 | 3.8586   | 13.5798  | -1.8153 | Down | 5.69E-11  | 1.71E-10  |
| Unigene12772  | Potri.005G256700.4 | 2.8546   | 10.0463  | -1.8153 | Down | 9.31E-16  | 3.50E-15  |
| Unigene116556 | Potri.004G190400.1 | 5.1965   | 18.2886  | -1.8153 | Down | 9.31E-16  | 3.50E-15  |
| Unigene85296  | Potri.004G070000.1 | 9.7473   | 34.3044  | -1.8153 | Down | 2.87E-25  | 1.52E-24  |
| Unigene5452   | Potri.002G169100.2 | 2.3808   | 8.379    | -1.8153 | Down | 5.69E-11  | 1.71E-10  |
| Unigene3060   | Potri.002G010500.1 | 3.0243   | 10.6436  | -1.8153 | Down | 1.80E-39  | 1.39E-38  |

|               |                     |         |          |         |      |           |           |
|---------------|---------------------|---------|----------|---------|------|-----------|-----------|
| Unigene66944  | Potri.001G467000.1  | 1.0304  | 3.6263   | -1.8153 | Down | 3.97E-06  | 8.68E-06  |
| Unigene64497  | Potri.001G257100.1  | 5.133   | 18.0649  | -1.8153 | Down | 5.69E-11  | 1.71E-10  |
| Unigene104210 | Potri.013G068800.4  | 1.0228  | 3.5998   | -1.8154 | Down | 9.31E-16  | 3.50E-15  |
| Unigene100676 | Potri.012G023300.1  | 1.6077  | 5.6583   | -1.8154 | Down | 3.97E-06  | 8.68E-06  |
| Unigene52311  | Potri.010G031300.1  | 16.2743 | 57.283   | -1.8155 | Down | 2.14E-52  | 2.19E-51  |
| Unigene1663   | Potri.018G102800.1  | 16.5285 | 58.1828  | -1.8156 | Down | 1.37E-60  | 1.64E-59  |
| Unigene48412  | Potri.017G012600.3  | 12.8217 | 45.1345  | -1.8156 | Down | 1.37E-60  | 1.64E-59  |
| Unigene73876  | Potri.005G251600.4  | 20.3134 | 71.5033  | -1.8156 | Down | 3.18E-38  | 2.39E-37  |
| Unigene545    | Potri.006G021300.2  | 2.1342  | 7.513    | -1.8157 | Down | 9.30E-29  | 5.45E-28  |
| Unigene89013  | Potri.002G256400.3  | 38.701  | 136.2348 | -1.8157 | Down | 1.16E-114 | 2.95E-113 |
| Unigene45339  | Potri.009G081100.1  | 21.85   | 76.9226  | -1.8158 | Down | 4.60E-64  | 5.87E-63  |
| Unigene22183  | Potri.002G215300.1  | 4.1068  | 14.4594  | -1.8159 | Down | 8.07E-63  | 1.01E-61  |
| Unigene43985  | Potri.006G189100.2  | 2.0336  | 7.1607   | -1.8161 | Down | 1.69E-14  | 6.03E-14  |
| Unigene2916   | Potri.005G083600.1  | 11.5422 | 40.6433  | -1.8161 | Down | 1.42E-61  | 1.73E-60  |
| Unigene18532  | Potri.001G472800.1  | 2.6439  | 9.3112   | -1.8163 | Down | 5.38E-31  | 3.36E-30  |
| Unigene58732  | Potri.012G140700.1  | 1.3469  | 4.7441   | -1.8165 | Down | 1.06E-09  | 2.97E-09  |
| Unigene8606   | Potri.004G041500.1  | 6.1379  | 21.6186  | -1.8165 | Down | 5.22E-18  | 2.16E-17  |
| Unigene26822  | Potri.008G201900.1  | 24.95   | 87.8882  | -1.8166 | Down | 3.20E-158 | 1.23E-156 |
| Unigene72257  | Potri.004G222500.3  | 20.8226 | 73.3478  | -1.8166 | Down | 5.80E-38  | 4.34E-37  |
| Unigene9772   | Potri.007G076900.1  | 8.3444  | 29.3972  | -1.8168 | Down | 3.12E-33  | 2.07E-32  |
| Unigene52374  | Potri.017G101200.1  | 4.7589  | 16.7669  | -1.8169 | Down | 3.09E-13  | 1.04E-12  |
| Unigene44609  | Potri.014G156000.1  | 2.4426  | 8.606    | -1.8169 | Down | 3.09E-13  | 1.04E-12  |
| Unigene3071   | Potri.010G183800.1  | 1.9248  | 6.7816   | -1.8169 | Down | 3.09E-13  | 1.04E-12  |
| Unigene27908  | Potri.005G160700.1  | 25.2763 | 89.0551  | -1.8169 | Down | 2.49E-118 | 6.59E-117 |
| Unigene43176  | Potri.004G133500.10 | 26.9684 | 95.0183  | -1.8169 | Down | 1.25E-191 | 6.15E-190 |
| Unigene39062  | Potri.012G084600.3  | 5.1154  | 18.0259  | -1.8172 | Down | 9.42E-17  | 3.70E-16  |
| Unigene35103  | Potri.011G096600.1  | 2.0162  | 7.1048   | -1.8172 | Down | 9.42E-17  | 3.70E-16  |
| Unigene9587   | Potri.003G221500.1  | 2.6603  | 9.3746   | -1.8172 | Down | 9.42E-17  | 3.70E-16  |
| Unigene6671   | Potri.002G180800.7  | 1.9982  | 7.0414   | -1.8172 | Down | 9.42E-17  | 3.70E-16  |
| Unigene23735  | Potri.019G054200.3  | 33.4227 | 117.7857 | -1.8173 | Down | 1.14E-259 | 8.25E-258 |
| Unigene76572  | Potri.016G069100.1  | 17.5817 | 61.9596  | -1.8173 | Down | 1.82E-35  | 1.27E-34  |
| Unigene32158  | Potri.009G095800.1  | 46.523  | 163.9604 | -1.8173 | Down | 0         | 0         |
| Unigene53219  | Potri.006G129100.2  | 8.6301  | 30.4147  | -1.8173 | Down | 2.95E-20  | 1.32E-19  |
| Unigene7978   | Potri.005G175400.1  | 6.3994  | 22.5549  | -1.8174 | Down | 9.39E-24  | 4.72E-23  |
| Unigene74556  | Potri.011G153600.1  | 27.9747 | 98.6026  | -1.8175 | Down | 7.35E-53  | 7.61E-52  |
| Unigene23281  | Potri.002G045400.1  | 22.2152 | 78.3021  | -1.8175 | Down | 2.06E-78  | 3.30E-77  |
| Unigene53249  | Potri.009G014700.2  | 15.3507 | 54.1122  | -1.8176 | Down | 1.06E-37  | 7.87E-37  |
| Unigene38474  | Potri.001G452700.1  | 6.0919  | 21.4743  | -1.8176 | Down | 1.06E-37  | 7.87E-37  |
| Unigene503    | Potri.009G005300.1  | 3.3494  | 11.8075  | -1.8177 | Down | 1.40E-87  | 2.55E-86  |

|               |                    |         |         |         |      |           |           |
|---------------|--------------------|---------|---------|---------|------|-----------|-----------|
| Unigene11406  | Potri.008G131500.3 | 8.2362  | 29.034  | -1.8177 | Down | 4.14E-84  | 7.18E-83  |
| Unigene190    | Potri.005G224900.2 | 17.0678 | 60.1684 | -1.8177 | Down | 3.98E-187 | 1.91E-185 |
| Unigene20060  | Potri.016G088000.2 | 1.3956  | 4.9206  | -1.8179 | Down | 7.95E-05  | 1.54E-04  |
| Unigene3959   | Potri.T174000.1    | 1.0131  | 3.572   | -1.818  | Down | 7.95E-05  | 1.54E-04  |
| Unigene49377  | Potri.T034800.1    | 1.0032  | 3.5371  | -1.818  | Down | 7.95E-05  | 1.54E-04  |
| Unigene21066  | Potri.018G089800.2 | 1.2663  | 4.465   | -1.818  | Down | 7.95E-05  | 1.54E-04  |
| Unigene48702  | Potri.018G029200.1 | 5.1936  | 18.3122 | -1.818  | Down | 5.67E-12  | 1.80E-11  |
| Unigene44997  | Potri.017G006900.1 | 1.2822  | 4.5208  | -1.818  | Down | 5.67E-12  | 1.80E-11  |
| Unigene45552  | Potri.015G008500.1 | 5.1749  | 18.2463 | -1.818  | Down | 2.28E-50  | 2.24E-49  |
| Unigene30759  | Potri.014G045300.1 | 1.8482  | 6.5165  | -1.818  | Down | 1.99E-08  | 5.18E-08  |
| Unigene65829  | Potri.013G129800.1 | 1.0309  | 3.6348  | -1.818  | Down | 7.95E-05  | 1.54E-04  |
| Unigene103530 | Potri.009G134300.8 | 8.5478  | 30.1389 | -1.818  | Down | 5.30E-19  | 2.28E-18  |
| Unigene113570 | Potri.008G026700.1 | 4.8081  | 16.9531 | -1.818  | Down | 5.67E-12  | 1.80E-11  |
| Unigene117353 | Potri.006G090300.1 | 1.1493  | 4.0523  | -1.818  | Down | 7.95E-05  | 1.54E-04  |
| Unigene19802  | Potri.005G235300.1 | 9.9105  | 34.9437 | -1.818  | Down | 5.30E-19  | 2.28E-18  |
| Unigene27317  | Potri.005G029000.1 | 1.5601  | 5.5006  | -1.818  | Down | 7.95E-05  | 1.54E-04  |
| Unigene26152  | Potri.004G040500.2 | 4.0623  | 14.3234 | -1.818  | Down | 1.99E-08  | 5.18E-08  |
| Unigene39399  | Potri.001G259100.7 | 11.3813 | 40.1295 | -1.818  | Down | 3.28E-71  | 4.70E-70  |
| Unigene4527   | Potri.001G091800.1 | 0.9564  | 3.3722  | -1.818  | Down | 7.95E-05  | 1.54E-04  |
| Unigene4099   | Potri.001G088100.3 | 1.2822  | 4.5208  | -1.818  | Down | 7.95E-05  | 1.54E-04  |
| Unigene85543  | Potri.002G232200.1 | 25.8524 | 91.1788 | -1.8184 | Down | 3.00E-65  | 3.91E-64  |
| Unigene54289  | Potri.018G118100.2 | 8.3781  | 29.5516 | -1.8185 | Down | 9.61E-25  | 4.99E-24  |
| Unigene13288  | Potri.003G129000.3 | 12.8812 | 45.4346 | -1.8185 | Down | 2.02E-74  | 3.04E-73  |
| Unigene95866  | Potri.015G080400.1 | 3.6707  | 12.9486 | -1.8187 | Down | 3.01E-21  | 1.40E-20  |
| Unigene13396  | Potri.005G120600.1 | 23.9812 | 84.5958 | -1.8187 | Down | 4.55E-187 | 2.18E-185 |
| Unigene19983  | Potri.005G090800.1 | 16.5288 | 58.3079 | -1.8187 | Down | 1.93E-37  | 1.43E-36  |
| Unigene44356  | Potri.019G035100.1 | 4.353   | 15.3568 | -1.8188 | Down | 9.56E-18  | 3.91E-17  |
| Unigene40025  | Potri.010G160200.7 | 2.9042  | 10.2457 | -1.8188 | Down | 9.56E-18  | 3.91E-17  |
| Unigene36862  | Potri.013G006100.4 | 5.7164  | 20.1696 | -1.819  | Down | 3.11E-14  | 1.10E-13  |
| Unigene22779  | Potri.012G042500.1 | 7.7744  | 27.4332 | -1.8191 | Down | 4.83E-58  | 5.54E-57  |
| Unigene15662  | Potri.017G118400.1 | 10.1726 | 35.8967 | -1.8192 | Down | 1.72E-23  | 8.56E-23  |
| Unigene28943  | Potri.015G031100.1 | 7.1277  | 25.1524 | -1.8192 | Down | 2.18E-76  | 3.39E-75  |
| Unigene13910  | Potri.004G066100.1 | 2.8508  | 10.0601 | -1.8192 | Down | 1.44E-54  | 1.54E-53  |
| Unigene23073  | Potri.017G007000.5 | 2.1634  | 7.6352  | -1.8194 | Down | 1.05E-10  | 3.12E-10  |
| Unigene12502  | Potri.015G094500.1 | 1.3762  | 4.857   | -1.8194 | Down | 1.05E-10  | 3.12E-10  |
| Unigene18767  | Potri.012G136200.1 | 15.3785 | 54.2827 | -1.8196 | Down | 6.70E-74  | 1.00E-72  |
| Unigene33834  | Potri.003G203900.1 | 4.3279  | 15.2765 | -1.8196 | Down | 9.85E-26  | 5.27E-25  |
| Unigene29262  | Potri.004G092500.1 | 23.143  | 81.6967 | -1.8197 | Down | 1.06E-120 | 2.89E-119 |
| Unigene82314  | Potri.004G168500.4 | 9.3249  | 32.921  | -1.8198 | Down | 3.07E-22  | 1.47E-21  |

|              |                    |          |          |         |      |           |           |
|--------------|--------------------|----------|----------|---------|------|-----------|-----------|
| Unigene16018 | Potri.016G116400.2 | 18.6498  | 65.844   | -1.8199 | Down | 1.33E-48  | 1.26E-47  |
| Unigene182   | Potri.007G036100.1 | 8.8076   | 31.0964  | -1.8199 | Down | 2.62E-54  | 2.79E-53  |
| Unigene89809 | Potri.002G128700.8 | 22.4819  | 79.3795  | -1.82   | Down | 2.06E-71  | 2.96E-70  |
| Unigene12337 | Potri.014G107000.1 | 4.3164   | 15.2427  | -1.8202 | Down | 1.81E-64  | 2.33E-63  |
| Unigene17803 | Potri.013G002600.3 | 2.6175   | 9.2434   | -1.8202 | Down | 5.68E-13  | 1.89E-12  |
| Unigene7070  | Potri.010G164300.4 | 18.2161  | 64.3275  | -1.8202 | Down | 1.20E-41  | 9.82E-41  |
| Unigene42236 | Potri.010G069000.2 | 1.9689   | 6.9529   | -1.8202 | Down | 3.80E-07  | 9.04E-07  |
| Unigene37277 | Potri.006G259500.1 | 3.038    | 10.7282  | -1.8202 | Down | 3.80E-07  | 9.04E-07  |
| Unigene52435 | Potri.006G211300.1 | 1.1341   | 4.0049   | -1.8202 | Down | 3.80E-07  | 9.04E-07  |
| Unigene91851 | Potri.016G137900.1 | 142.4471 | 503.0424 | -1.8203 | Down | 0         | 0         |
| Unigene4489  | Potri.012G142400.3 | 1.5087   | 5.3279   | -1.8203 | Down | 3.80E-07  | 9.04E-07  |
| Unigene54733 | Potri.002G032800.1 | 1.8912   | 6.6787   | -1.8203 | Down | 3.80E-07  | 9.04E-07  |
| Unigene13945 | Potri.001G133900.1 | 1.5224   | 5.3763   | -1.8203 | Down | 5.68E-13  | 1.89E-12  |
| Unigene7088  | Potri.015G041800.1 | 17.9092  | 63.2518  | -1.8204 | Down | 7.06E-44  | 6.04E-43  |
| Unigene18277 | Potri.014G180100.1 | 5.0562   | 17.8601  | -1.8206 | Down | 2.13E-40  | 1.68E-39  |
| Unigene26869 | Potri.013G152100.1 | 7.0008   | 24.7294  | -1.8206 | Down | 5.51E-21  | 2.53E-20  |
| Unigene38852 | Potri.011G146700.3 | 1.9117   | 6.7534   | -1.8208 | Down | 3.14E-15  | 1.15E-14  |
| Unigene49487 | Potri.010G152700.1 | 4.9965   | 17.6514  | -1.8208 | Down | 3.14E-15  | 1.15E-14  |
| Unigene17279 | Potri.002G109000.1 | 17.7707  | 62.7809  | -1.8208 | Down | 1.88E-91  | 3.59E-90  |
| Unigene33360 | Potri.011G168100.1 | 7.4709   | 26.3956  | -1.8209 | Down | 7.30E-45  | 6.38E-44  |
| Unigene34938 | Potri.003G003500.1 | 13.4693  | 47.5931  | -1.8211 | Down | 1.95E-92  | 3.77E-91  |
| Unigene47769 | Potri.006G060600.1 | 8.1559   | 28.8209  | -1.8212 | Down | 1.80E-25  | 9.55E-25  |
| Unigene9338  | Potri.001G459200.1 | 1.8037   | 6.3737   | -1.8212 | Down | 1.96E-09  | 5.40E-09  |
| Unigene1291  | Potri.012G089000.6 | 4.0684   | 14.3782  | -1.8213 | Down | 1.14E-35  | 8.04E-35  |
| Unigene38223 | Potri.004G206900.1 | 8.212    | 29.0226  | -1.8214 | Down | 1.14E-35  | 8.04E-35  |
| Unigene17225 | Potri.010G039600.1 | 5.0025   | 17.6815  | -1.8215 | Down | 9.89E-20  | 4.36E-19  |
| Unigene45501 | Potri.008G204400.2 | 8.741    | 30.8975  | -1.8216 | Down | 3.69E-163 | 1.48E-161 |
| Unigene4279  | Potri.005G235900.5 | 8.8289   | 31.2077  | -1.8216 | Down | 5.99E-30  | 3.63E-29  |
| Unigene27754 | Potri.002G221300.1 | 2.5288   | 8.9395   | -1.8217 | Down | 1.05E-11  | 3.27E-11  |
| Unigene6817  | Potri.011G149300.1 | 9.9664   | 35.2344  | -1.8218 | Down | 9.03E-55  | 9.71E-54  |
| Unigene35106 | Potri.007G090400.1 | 26.9617  | 95.3139  | -1.8218 | Down | 2.30E-166 | 9.47E-165 |
| Unigene41718 | Potri.006G074900.1 | 6.3828   | 22.5639  | -1.8218 | Down | 5.62E-22  | 2.67E-21  |
| Unigene50223 | Potri.001G346000.3 | 3.0371   | 10.7365  | -1.8218 | Down | 5.62E-22  | 2.67E-21  |
| Unigene16704 | Potri.005G085100.3 | 5.2649   | 18.6146  | -1.822  | Down | 7.81E-47  | 7.14E-46  |
| Unigene14364 | Potri.008G069300.1 | 8.7107   | 30.8006  | -1.8221 | Down | 1.85E-26  | 1.01E-25  |
| Unigene32451 | Potri.002G188400.1 | 8.7912   | 31.0848  | -1.8221 | Down | 2.50E-123 | 6.96E-122 |
| Unigene11323 | Potri.005G252400.1 | 4.7164   | 16.6792  | -1.8223 | Down | 2.35E-43  | 1.99E-42  |
| Unigene50744 | Potri.008G087800.1 | 4.9986   | 17.6785  | -1.8224 | Down | 8.08E-48  | 7.55E-47  |
| Unigene42781 | Potri.006G024600.1 | 13.8874  | 49.1153  | -1.8224 | Down | 1.24E-183 | 5.82E-182 |

|               |                     |         |          |         |      |           |           |
|---------------|---------------------|---------|----------|---------|------|-----------|-----------|
| Unigene30162  | Potri.003G164300.4  | 5.4459  | 19.2623  | -1.8225 | Down | 1.78E-18  | 7.49E-18  |
| Unigene36484  | Potri.015G105300.3  | 48.9619 | 173.1972 | -1.8227 | Down | 1.98E-156 | 7.49E-155 |
| Unigene3263   | Potri.003G064000.2  | 8.8787  | 31.4086  | -1.8227 | Down | 2.00E-63  | 2.52E-62  |
| Unigene16333  | Potri.009G169300.3  | 32.721  | 115.7544 | -1.8228 | Down | 5.38E-172 | 2.30E-170 |
| Unigene80328  | Potri.001G289400.9  | 21.2925 | 75.3269  | -1.8228 | Down | 1.42E-46  | 1.29E-45  |
| Unigene32836  | Potri.016G071700.1  | 6.5304  | 23.1033  | -1.8229 | Down | 2.45E-72  | 3.56E-71  |
| Unigene26110  | Potri.013G059700.1  | 11.3581 | 40.1852  | -1.8229 | Down | 1.89E-27  | 1.07E-26  |
| Unigene25782  | Potri.002G096900.1  | 19.4556 | 68.8358  | -1.823  | Down | 1.71E-55  | 1.86E-54  |
| Unigene26726  | Potri.002G162400.1  | 20.0312 | 70.8822  | -1.8232 | Down | 1.25E-38  | 9.49E-38  |
| Unigene120    | Potri.010G113000.1  | 4.4559  | 15.7689  | -1.8233 | Down | 8.21E-98  | 1.71E-96  |
| Unigene34338  | Potri.016G091400.1  | 5.1912  | 18.3763  | -1.8237 | Down | 6.38E-62  | 7.85E-61  |
| Unigene114253 | Potri.016G038100.13 | 1.9558  | 6.9233   | -1.8237 | Down | 7.42E-06  | 1.59E-05  |
| Unigene19944  | Potri.013G122000.1  | 31.083  | 110.0309 | -1.8237 | Down | 5.29E-102 | 1.16E-100 |
| Unigene21100  | Potri.011G070900.2  | 1.3742  | 4.8645   | -1.8237 | Down | 3.69E-08  | 9.43E-08  |
| Unigene50608  | Potri.010G227200.2  | 1.8518  | 6.555    | -1.8237 | Down | 3.69E-08  | 9.43E-08  |
| Unigene102587 | Potri.010G140700.1  | 1.2287  | 4.3495   | -1.8237 | Down | 7.42E-06  | 1.59E-05  |
| Unigene43486  | Potri.006G254700.1  | 4.0098  | 14.1942  | -1.8237 | Down | 1.08E-59  | 1.28E-58  |
| Unigene62968  | Potri.006G076200.1  | 6.8509  | 24.2517  | -1.8237 | Down | 1.03E-21  | 4.85E-21  |
| Unigene8816   | Potri.003G033100.1  | 6.2613  | 22.1645  | -1.8237 | Down | 5.88E-24  | 2.98E-23  |
| Unigene30126  | Potri.002G058300.1  | 2.9783  | 10.5429  | -1.8237 | Down | 3.69E-08  | 9.43E-08  |
| Unigene22847  | Potri.002G028600.2  | 1.995   | 7.0622   | -1.8237 | Down | 1.81E-19  | 7.91E-19  |
| Unigene104251 | Potri.001G072400.1  | 2.1489  | 7.6071   | -1.8237 | Down | 7.42E-06  | 1.59E-05  |
| Unigene52441  | Potri.015G117200.1  | 21.0211 | 74.4324  | -1.8241 | Down | 5.46E-54  | 5.78E-53  |
| Unigene49299  | Potri.006G049200.1  | 14.7987 | 52.3993  | -1.8241 | Down | 3.22E-56  | 3.57E-55  |
| Unigene47710  | Potri.005G229200.1  | 22.892  | 81.0603  | -1.8242 | Down | 2.68E-47  | 2.48E-46  |
| Unigene16500  | Potri.013G041600.1  | 87.9623 | 311.5144 | -1.8243 | Down | 0         | 0         |
| Unigene29348  | Potri.006G077800.1  | 13.5635 | 48.0357  | -1.8244 | Down | 1.16E-61  | 1.42E-60  |
| Unigene29417  | Potri.010G029200.2  | 3.6549  | 12.9456  | -1.8246 | Down | 6.02E-25  | 3.14E-24  |
| Unigene53227  | Potri.004G039500.1  | 10.513  | 37.2373  | -1.8246 | Down | 6.02E-25  | 3.14E-24  |
| Unigene16127  | Potri.007G077100.1  | 10.7902 | 38.2238  | -1.8247 | Down | 3.19E-79  | 5.19E-78  |
| Unigene66097  | Potri.012G027400.1  | 5.5997  | 19.837   | -1.8248 | Down | 1.85E-20  | 8.34E-20  |
| Unigene738    | Potri.010G071200.4  | 10.935  | 38.7375  | -1.8248 | Down | 5.39E-77  | 8.46E-76  |
| Unigene30544  | Potri.006G254100.1  | 19.9994 | 70.8529  | -1.8249 | Down | 9.96E-54  | 1.05E-52  |
| Unigene50010  | Potri.005G114300.1  | 15.6166 | 55.3275  | -1.8249 | Down | 1.17E-84  | 2.05E-83  |
| Unigene84698  | Potri.003G077600.1  | 31.7245 | 112.4042 | -1.825  | Down | 5.60E-78  | 8.90E-77  |
| Unigene23096  | Potri.008G108800.1  | 5.767   | 20.4337  | -1.8251 | Down | 2.57E-135 | 8.03E-134 |
| Unigene63932  | Potri.007G100800.1  | 4.1342  | 14.6488  | -1.8251 | Down | 5.82E-16  | 2.21E-15  |
| Unigene21740  | Potri.001G326700.2  | 4.4229  | 15.6717  | -1.8251 | Down | 2.05E-30  | 1.26E-29  |
| Unigene46685  | Potri.006G039000.2  | 26.4604 | 93.7655  | -1.8252 | Down | 1.03E-54  | 1.11E-53  |

|               |                    |         |          |         |      |           |           |
|---------------|--------------------|---------|----------|---------|------|-----------|-----------|
| Unigene75799  | Potri.002G047100.2 | 40.4775 | 143.4414 | -1.8253 | Down | 5.82E-79  | 9.40E-78  |
| Unigene32618  | Potri.007G033000.1 | 2.8291  | 10.0262  | -1.8254 | Down | 6.17E-26  | 3.32E-25  |
| Unigene90565  | Potri.003G043200.1 | 16.9631 | 60.1221  | -1.8255 | Down | 6.30E-58  | 7.21E-57  |
| Unigene3619   | Potri.005G211500.2 | 23.2946 | 82.5692  | -1.8256 | Down | 2.23E-107 | 5.20E-106 |
| Unigene31697  | Potri.005G193300.2 | 11.7664 | 41.7064  | -1.8256 | Down | 1.23E-33  | 8.21E-33  |
| Unigene22517  | Potri.007G106400.2 | 2.9725  | 10.537   | -1.8257 | Down | 1.93E-11  | 5.94E-11  |
| Unigene60316  | Potri.005G049800.1 | 5.0714  | 17.9776  | -1.8257 | Down | 1.93E-11  | 5.94E-11  |
| Unigene65816  | Potri.002G080600.2 | 8.2592  | 29.2778  | -1.8257 | Down | 2.11E-31  | 1.33E-30  |
| Unigene42986  | Potri.013G013000.1 | 2.7185  | 9.6369   | -1.8258 | Down | 2.11E-31  | 1.33E-30  |
| Unigene28880  | Potri.018G108000.1 | 5.5522  | 19.6836  | -1.8259 | Down | 4.30E-39  | 3.30E-38  |
| Unigene9251   | Potri.006G106500.2 | 18.7588 | 66.5053  | -1.8259 | Down | 1.11E-56  | 1.24E-55  |
| Unigene4396   | Potri.014G000500.5 | 12.0429 | 42.708   | -1.8263 | Down | 1.10E-24  | 5.70E-24  |
| Unigene79777  | Potri.012G128300.2 | 51.3633 | 182.151  | -1.8263 | Down | 4.39E-109 | 1.05E-107 |
| Unigene15329  | Potri.005G235300.1 | 8.7936  | 31.185   | -1.8263 | Down | 4.44E-40  | 3.49E-39  |
| Unigene13334  | Potri.003G178500.1 | 3.2356  | 11.4746  | -1.8263 | Down | 1.10E-24  | 5.70E-24  |
| Unigene30206  | Potri.019G042800.1 | 12.507  | 44.3587  | -1.8265 | Down | 7.59E-38  | 5.66E-37  |
| Unigene83137  | Potri.008G155500.1 | 12.4332 | 44.0984  | -1.8265 | Down | 3.75E-30  | 2.29E-29  |
| Unigene2332   | Potri.001G317500.2 | 8.1165  | 28.7879  | -1.8265 | Down | 3.75E-30  | 2.29E-29  |
| Unigene35225  | Potri.018G124700.4 | 51.8109 | 183.7865 | -1.8267 | Down | 9.73E-156 | 3.66E-154 |
| Unigene6534   | Potri.008G178700.1 | 16.5651 | 58.7602  | -1.8267 | Down | 9.55E-49  | 9.09E-48  |
| Unigene87279  | Potri.004G150300.2 | 16.6835 | 59.1865  | -1.8268 | Down | 1.63E-46  | 1.48E-45  |
| Unigene5517   | Potri.003G031100.1 | 1.6898  | 5.9945   | -1.8268 | Down | 1.06E-14  | 3.81E-14  |
| Unigene25275  | Potri.002G214100.3 | 3.3318  | 11.8192  | -1.8268 | Down | 1.06E-14  | 3.81E-14  |
| Unigene43023  | Potri.018G057900.4 | 1.6616  | 5.8951   | -1.8269 | Down | 3.38E-20  | 1.51E-19  |
| Unigene17521  | Potri.014G155800.2 | 33.8425 | 120.0656 | -1.8269 | Down | 1.14E-120 | 3.09E-119 |
| Unigene33832  | Potri.010G014000.1 | 9.2023  | 32.6483  | -1.8269 | Down | 1.22E-181 | 5.61E-180 |
| Unigene17583  | Potri.009G017400.2 | 6.8031  | 24.1364  | -1.8269 | Down | 3.38E-20  | 1.51E-19  |
| Unigene48962  | Potri.007G044100.1 | 17.1229 | 60.7478  | -1.8269 | Down | 3.79E-102 | 8.32E-101 |
| Unigene22225  | Potri.006G046500.2 | 10.5883 | 37.5638  | -1.8269 | Down | 2.51E-128 | 7.31E-127 |
| Unigene28575  | Potri.001G153000.1 | 41.8142 | 148.3494 | -1.8269 | Down | 4.21E-126 | 1.20E-124 |
| Unigene44715  | Potri.019G032800.6 | 13.2493 | 47.012   | -1.8271 | Down | 4.90E-90  | 9.18E-89  |
| Unigene21017  | Potri.018G149100.3 | 13.7827 | 48.909   | -1.8272 | Down | 6.02E-53  | 6.25E-52  |
| Unigene83006  | Potri.012G134300.5 | 17.6682 | 62.695   | -1.8272 | Down | 4.73E-42  | 3.89E-41  |
| Unigene22496  | Potri.019G025600.2 | 1.8274  | 6.4852   | -1.8274 | Down | 7.08E-07  | 1.65E-06  |
| Unigene13638  | Potri.018G113000.1 | 1.1786  | 4.1828   | -1.8274 | Down | 1.92E-12  | 6.24E-12  |
| Unigene105489 | Potri.016G129000.1 | 1.5026  | 5.3326   | -1.8274 | Down | 7.08E-07  | 1.65E-06  |
| Unigene37007  | Potri.009G124200.3 | 2.8563  | 10.1368  | -1.8274 | Down | 7.08E-07  | 1.65E-06  |
| Unigene25583  | Potri.007G072300.1 | 1.0675  | 3.7885   | -1.8274 | Down | 7.08E-07  | 1.65E-06  |
| Unigene53708  | Potri.004G164500.1 | 12.6818 | 45.0074  | -1.8274 | Down | 6.67E-29  | 3.92E-28  |

|               |                     |         |          |         |      |           |           |
|---------------|---------------------|---------|----------|---------|------|-----------|-----------|
| Unigene102039 | Potri.003G089700.1  | 1.7762  | 6.3036   | -1.8274 | Down | 1.92E-12  | 6.24E-12  |
| Unigene18737  | Potri.003G032300.3  | 2.411   | 8.5565   | -1.8274 | Down | 1.92E-12  | 6.24E-12  |
| Unigene102863 | Potri.002G215600.2  | 2.0722  | 7.3542   | -1.8274 | Down | 7.08E-07  | 1.65E-06  |
| Unigene3752   | Potri.001G326500.1  | 2.3312  | 8.2734   | -1.8274 | Down | 7.08E-07  | 1.65E-06  |
| Unigene105657 | Potri.010G138100.1  | 1.1941  | 4.238    | -1.8275 | Down | 7.08E-07  | 1.65E-06  |
| Unigene32147  | Potri.008G004300.4  | 33.0457 | 117.2882 | -1.8275 | Down | 6.41E-270 | 4.89E-268 |
| Unigene38716  | Potri.004G078300.3  | 24.6674 | 87.5502  | -1.8275 | Down | 3.94E-81  | 6.55E-80  |
| Unigene22232  | Potri.014G000500.5  | 8.1343  | 28.8749  | -1.8277 | Down | 1.12E-76  | 1.75E-75  |
| Unigene2297   | Potri.011G131800.1  | 4.1444  | 14.7117  | -1.8277 | Down | 1.16E-26  | 6.37E-26  |
| Unigene47086  | Potri.011G046900.1  | 13.1052 | 46.5207  | -1.8277 | Down | 1.16E-26  | 6.36E-26  |
| Unigene35     | Potri.008G105200.2  | 6.983   | 24.7884  | -1.8277 | Down | 4.60E-146 | 1.59E-144 |
| Unigene32657  | Potri.007G032700.1  | 6.5453  | 23.2342  | -1.8277 | Down | 1.06E-51  | 1.07E-50  |
| Unigene13443  | Potri.019G077000.1  | 17.8389 | 63.3265  | -1.8278 | Down | 3.42E-174 | 1.49E-172 |
| Unigene119352 | Potri.001G053100.1  | 3.2182  | 11.4246  | -1.8278 | Down | 3.44E-21  | 1.59E-20  |
| Unigene7164   | Potri.005G208600.2  | 25.5366 | 90.6604  | -1.8279 | Down | 4.26E-83  | 7.27E-82  |
| Unigene18404  | Potri.005G057300.1  | 6.2166  | 22.07    | -1.8279 | Down | 5.19E-69  | 7.18E-68  |
| Unigene91810  | Potri.014G165300.4  | 21.1929 | 75.2559  | -1.8282 | Down | 7.45E-82  | 1.25E-80  |
| Unigene17877  | Potri.001G454400.1  | 26.4931 | 94.0784  | -1.8282 | Down | 3.84E-99  | 8.15E-98  |
| Unigene27804  | Potri.018G109400.3  | 2.5889  | 9.194    | -1.8284 | Down | 3.57E-10  | 1.03E-09  |
| Unigene44294  | Potri.016G056300.1  | 2.1291  | 7.5613   | -1.8284 | Down | 3.57E-10  | 1.03E-09  |
| Unigene39544  | Potri.009G022200.1  | 5.5538  | 19.7245  | -1.8284 | Down | 2.47E-103 | 5.49E-102 |
| Unigene45021  | Potri.001G132900.1  | 4.0216  | 14.2838  | -1.8285 | Down | 7.04E-31  | 4.38E-30  |
| Unigene79530  | Potri.001G412900.11 | 9.8237  | 34.8933  | -1.8286 | Down | 3.52E-22  | 1.68E-21  |
| Unigene4601   | Potri.002G233500.4  | 5.5203  | 19.6104  | -1.8288 | Down | 1.93E-13  | 6.56E-13  |
| Unigene13171  | Potri.014G066500.4  | 17.4594 | 62.0267  | -1.8289 | Down | 2.29E-79  | 3.72E-78  |
| Unigene25418  | Potri.009G096400.1  | 11.8233 | 42.0049  | -1.8289 | Down | 1.22E-28  | 7.10E-28  |
| Unigene60393  | Potri.017G075600.1  | 7.8262  | 27.8067  | -1.829  | Down | 1.08E-16  | 4.23E-16  |
| Unigene32833  | Potri.010G011200.1  | 6.2166  | 22.0876  | -1.829  | Down | 7.25E-32  | 4.64E-31  |
| Unigene88027  | Potri.003G127100.1  | 16.1326 | 57.3194  | -1.829  | Down | 5.59E-47  | 5.13E-46  |
| Unigene36259  | Potri.008G106500.1  | 2.5008  | 8.8855   | -1.8291 | Down | 1.08E-16  | 4.24E-16  |
| Unigene50500  | Potri.009G120300.1  | 22.1006 | 78.5324  | -1.8292 | Down | 3.45E-93  | 6.74E-92  |
| Unigene21533  | Potri.006G233000.2  | 35.9968 | 127.9092 | -1.8292 | Down | 0         | 0         |
| Unigene51012  | Potri.001G379100.1  | 9.2038  | 32.7048  | -1.8292 | Down | 6.18E-20  | 2.75E-19  |
| Unigene24065  | Potri.003G116400.1  | 5.409   | 19.2225  | -1.8294 | Down | 5.78E-48  | 5.42E-47  |
| Unigene103829 | Potri.007G022600.1  | 1.029   | 3.6571   | -1.8295 | Down | 2.11E-26  | 1.15E-25  |
| Unigene38479  | Potri.014G193800.1  | 10.6893 | 37.9933  | -1.8296 | Down | 5.49E-108 | 1.29E-106 |
| Unigene91287  | Potri.001G302000.2  | 15.046  | 53.4832  | -1.8297 | Down | 2.22E-55  | 2.42E-54  |
| Unigene14324  | Potri.015G050900.1  | 1.4129  | 5.0232   | -1.8299 | Down | 1.50E-04  | 2.82E-04  |
| Unigene46962  | Potri.010G219600.5  | 1.3815  | 4.9115   | -1.8299 | Down | 6.84E-08  | 1.72E-07  |

|               |                    |         |          |         |      |           |           |
|---------------|--------------------|---------|----------|---------|------|-----------|-----------|
| Unigene3754   | Potri.008G186900.9 | 2.0916  | 7.4361   | -1.8299 | Down | 3.55E-11  | 1.08E-10  |
| Unigene41144  | Potri.003G064300.1 | 1.6432  | 5.8419   | -1.8299 | Down | 1.50E-04  | 2.82E-04  |
| Unigene33527  | Potri.T034000.2    | 5.9839  | 21.2745  | -1.83   | Down | 6.30E-21  | 2.89E-20  |
| Unigene63560  | Potri.016G022500.1 | 4.9866  | 17.7288  | -1.83   | Down | 1.10E-17  | 4.47E-17  |
| Unigene30845  | Potri.011G051400.1 | 2.7732  | 9.8596   | -1.83   | Down | 6.84E-08  | 1.72E-07  |
| Unigene11662  | Potri.010G039000.1 | 3.3986  | 12.083   | -1.83   | Down | 2.78E-40  | 2.19E-39  |
| Unigene58635  | Potri.009G078700.3 | 1.5738  | 5.5954   | -1.83   | Down | 1.50E-04  | 2.82E-04  |
| Unigene17656  | Potri.007G093000.1 | 1.162   | 4.1312   | -1.83   | Down | 1.50E-04  | 2.82E-04  |
| Unigene20524  | Potri.007G076900.1 | 12.9512 | 46.0455  | -1.83   | Down | 7.68E-34  | 5.17E-33  |
| Unigene44311  | Potri.006G173600.1 | 1.552   | 5.5178   | -1.83   | Down | 3.55E-11  | 1.08E-10  |
| Unigene119124 | Potri.006G130000.1 | 1.273   | 4.526    | -1.83   | Down | 6.84E-08  | 1.72E-07  |
| Unigene64938  | Potri.006G091900.2 | 4.9295  | 17.5257  | -1.83   | Down | 3.55E-11  | 1.08E-10  |
| Unigene74513  | Potri.004G116700.3 | 6.9073  | 24.5576  | -1.83   | Down | 1.94E-14  | 6.90E-14  |
| Unigene40873  | Potri.003G116400.2 | 12.0537 | 42.8546  | -1.83   | Down | 1.41E-59  | 1.66E-58  |
| Unigene2720   | Potri.002G166500.1 | 7.3497  | 26.1303  | -1.83   | Down | 2.17E-27  | 1.22E-26  |
| Unigene2228   | Potri.001G273900.1 | 9.8958  | 35.1826  | -1.83   | Down | 1.68E-43  | 1.43E-42  |
| Unigene23351  | Potri.001G249000.1 | 10.4955 | 37.3148  | -1.83   | Down | 1.68E-43  | 1.43E-42  |
| Unigene25112  | Potri.013G143300.1 | 22.0233 | 78.3131  | -1.8302 | Down | 2.39E-57  | 2.70E-56  |
| Unigene77532  | Potri.008G108000.3 | 74.7599 | 265.8806 | -1.8304 | Down | 4.05E-151 | 1.47E-149 |
| Unigene11766  | Potri.019G127500.1 | 8.367   | 29.7598  | -1.8306 | Down | 2.81E-139 | 9.14E-138 |
| Unigene45690  | Potri.014G081200.1 | 4.3839  | 15.5939  | -1.8307 | Down | 2.57E-59  | 3.02E-58  |
| Unigene117231 | Potri.003G207100.1 | 6.6948  | 23.8135  | -1.8307 | Down | 6.43E-22  | 3.05E-21  |
| Unigene79040  | Potri.001G205800.8 | 18.0281 | 64.1289  | -1.8307 | Down | 4.91E-39  | 3.76E-38  |
| Unigene38151  | Potri.004G082900.2 | 16.0994 | 57.2725  | -1.8308 | Down | 1.00E-66  | 1.34E-65  |
| Unigene13239  | Potri.002G129100.2 | 3.6977  | 13.1544  | -1.8308 | Down | 1.13E-49  | 1.09E-48  |
| Unigene45126  | Potri.001G095300.2 | 4.2605  | 15.1561  | -1.8308 | Down | 8.16E-36  | 5.78E-35  |
| Unigene43906  | Potri.012G134500.1 | 15.4485 | 54.9598  | -1.8309 | Down | 5.31E-122 | 1.46E-120 |
| Unigene23001  | Potri.006G264800.1 | 3.099   | 11.0251  | -1.8309 | Down | 1.86E-46  | 1.68E-45  |
| Unigene751    | Potri.002G232500.1 | 14.6029 | 51.9501  | -1.8309 | Down | 2.13E-111 | 5.24E-110 |
| Unigene38922  | Potri.005G207700.1 | 17.2644 | 61.426   | -1.831  | Down | 7.12E-54  | 7.52E-53  |
| Unigene2954   | Potri.019G128000.2 | 4.1486  | 14.7619  | -1.8312 | Down | 8.41E-37  | 6.11E-36  |
| Unigene525    | Potri.003G077600.1 | 17.2823 | 61.4949  | -1.8312 | Down | 5.79E-142 | 1.93E-140 |
| Unigene33559  | Potri.013G032200.1 | 3.6579  | 13.0169  | -1.8313 | Down | 6.57E-23  | 3.22E-22  |
| Unigene1579   | Potri.004G084800.6 | 9.673   | 34.4219  | -1.8313 | Down | 3.17E-44  | 2.73E-43  |
| Unigene9750   | Potri.002G083200.8 | 5.3558  | 19.0622  | -1.8315 | Down | 1.13E-19  | 4.98E-19  |
| Unigene3266   | Potri.017G149700.1 | 2.5652  | 9.1302   | -1.8316 | Down | 3.27E-45  | 2.88E-44  |
| Unigene38281  | Potri.013G148400.6 | 1.7836  | 6.3494   | -1.8318 | Down | 6.69E-09  | 1.79E-08  |
| Unigene561    | Potri.012G013900.2 | 3.8974  | 13.874   | -1.8318 | Down | 1.88E-86  | 3.36E-85  |
| Unigene19461  | Potri.019G097000.3 | 1.8489  | 6.5821   | -1.8319 | Down | 6.69E-09  | 1.79E-08  |



|               |                    |         |          |         |      |           |           |
|---------------|--------------------|---------|----------|---------|------|-----------|-----------|
| Unigene21632  | Potri.017G102300.1 | 1.8331  | 6.5258   | -1.8319 | Down | 1.98E-16  | 7.68E-16  |
| Unigene49402  | Potri.016G005400.5 | 2.3504  | 8.3673   | -1.8319 | Down | 6.69E-09  | 1.79E-08  |
| Unigene85775  | Potri.009G100800.2 | 32.2075 | 114.6581 | -1.8319 | Down | 3.04E-83  | 5.21E-82  |
| Unigene119429 | Potri.008G182900.6 | 2.2139  | 7.8815   | -1.8319 | Down | 1.98E-16  | 7.68E-16  |
| Unigene75150  | Potri.001G193400.1 | 19.5865 | 69.7278  | -1.8319 | Down | 8.95E-39  | 6.81E-38  |
| Unigene22964  | Potri.001G164800.5 | 1.6095  | 5.73     | -1.8319 | Down | 6.69E-09  | 1.79E-08  |
| Unigene27473  | Potri.016G135100.1 | 10.094  | 35.9388  | -1.832  | Down | 1.49E-35  | 1.05E-34  |
| Unigene9412   | Potri.013G139300.1 | 14.2924 | 50.8887  | -1.8321 | Down | 4.06E-28  | 2.34E-27  |
| Unigene19871  | Potri.008G118700.1 | 14.835  | 52.8192  | -1.8321 | Down | 1.49E-35  | 1.05E-34  |
| Unigene24097  | Potri.005G194700.1 | 4.3139  | 15.3599  | -1.8321 | Down | 4.06E-28  | 2.34E-27  |
| Unigene18731  | Potri.004G149500.1 | 4.315   | 15.3649  | -1.8322 | Down | 1.15E-20  | 5.25E-20  |
| Unigene16518  | Potri.017G111500.2 | 27.5344 | 98.0485  | -1.8323 | Down | 1.39E-112 | 3.46E-111 |
| Unigene44867  | Potri.007G049800.1 | 6.5137  | 23.1951  | -1.8323 | Down | 2.48E-32  | 1.61E-31  |
| Unigene19792  | Potri.006G253100.1 | 26.734  | 95.2027  | -1.8323 | Down | 1.39E-55  | 1.52E-54  |
| Unigene20603  | Potri.006G077800.1 | 19.9648 | 71.0969  | -1.8323 | Down | 1.39E-55  | 1.52E-54  |
| Unigene6905   | Potri.003G058300.1 | 11.0733 | 39.4317  | -1.8323 | Down | 2.48E-32  | 1.61E-31  |
| Unigene10298  | Potri.001G049400.3 | 14.1174 | 50.2715  | -1.8323 | Down | 2.48E-32  | 1.61E-31  |
| Unigene33017  | Potri.013G114200.1 | 4.9575  | 17.6582  | -1.8327 | Down | 3.75E-49  | 3.60E-48  |
| Unigene25876  | Potri.010G110000.1 | 16.2614 | 57.9236  | -1.8327 | Down | 6.33E-105 | 1.43E-103 |
| Unigene88200  | Potri.018G027500.3 | 21.0873 | 75.1182  | -1.8328 | Down | 9.49E-62  | 1.16E-60  |
| Unigene89233  | Potri.015G089300.1 | 22.5285 | 80.2559  | -1.8329 | Down | 3.85E-70  | 5.42E-69  |
| Unigene50374  | Potri.008G069000.5 | 5.5884  | 19.9106  | -1.833  | Down | 4.00E-71  | 5.72E-70  |
| Unigene71197  | Potri.012G052700.1 | 54.6568 | 194.759  | -1.8332 | Down | 2.89E-97  | 5.96E-96  |
| Unigene117191 | Potri.019G131500.1 | 1.3894  | 4.9512   | -1.8333 | Down | 1.39E-05  | 2.91E-05  |
| Unigene94754  | Potri.019G004600.1 | 2.2659  | 8.0746   | -1.8333 | Down | 1.39E-05  | 2.91E-05  |
| Unigene118239 | Potri.017G032100.1 | 1.1545  | 4.1142   | -1.8333 | Down | 1.39E-05  | 2.91E-05  |
| Unigene86130  | Potri.016G029200.1 | 16.2716 | 57.9854  | -1.8333 | Down | 1.05E-43  | 8.97E-43  |
| Unigene48844  | Potri.015G045600.1 | 2.7357  | 9.7487   | -1.8333 | Down | 2.71E-35  | 1.89E-34  |
| Unigene46427  | Potri.013G019000.2 | 1.2276  | 4.3746   | -1.8333 | Down | 1.39E-05  | 2.91E-05  |
| Unigene39192  | Potri.012G037700.2 | 4.4759  | 15.9504  | -1.8333 | Down | 1.68E-39  | 1.31E-38  |
| Unigene88402  | Potri.012G020000.1 | 2.9123  | 10.3782  | -1.8333 | Down | 6.59E-10  | 1.87E-09  |
| Unigene66736  | Potri.010G193500.2 | 1.8298  | 6.5206   | -1.8333 | Down | 1.39E-05  | 2.91E-05  |
| Unigene109074 | Potri.007G002800.3 | 9.1489  | 32.6031  | -1.8333 | Down | 2.04E-18  | 8.56E-18  |
| Unigene117976 | Potri.005G195700.1 | 1.2214  | 4.3526   | -1.8333 | Down | 1.39E-05  | 2.91E-05  |
| Unigene34370  | Potri.004G046400.1 | 2.6042  | 9.2801   | -1.8333 | Down | 1.20E-22  | 5.83E-22  |
| Unigene28682  | Potri.003G173700.1 | 6.5526  | 23.3509  | -1.8333 | Down | 1.68E-39  | 1.31E-38  |
| Unigene18862  | Potri.002G180100.2 | 1.5492  | 5.5207   | -1.8333 | Down | 6.59E-10  | 1.87E-09  |
| Unigene1954   | Potri.001G410300.1 | 1.0273  | 3.6609   | -1.8333 | Down | 1.39E-05  | 2.91E-05  |
| Unigene61197  | Potri.T049200.1    | 1.5692  | 5.5921   | -1.8334 | Down | 1.39E-05  | 2.91E-05  |

|               |                    |         |          |         |      |           |           |
|---------------|--------------------|---------|----------|---------|------|-----------|-----------|
| Unigene99358  | Potri.010G216600.4 | 1.6549  | 5.8975   | -1.8334 | Down | 1.39E-05  | 2.91E-05  |
| Unigene17156  | Potri.009G100100.2 | 9.6739  | 34.4905  | -1.834  | Down | 4.67E-33  | 3.08E-32  |
| Unigene13124  | Potri.015G104100.1 | 4.6717  | 16.6573  | -1.8341 | Down | 1.86E-42  | 1.54E-41  |
| Unigene20820  | Potri.006G120200.1 | 19.6277 | 69.9855  | -1.8342 | Down | 1.49E-92  | 2.88E-91  |
| Unigene45412  | Potri.001G396900.1 | 3.3909  | 12.0911  | -1.8342 | Down | 2.98E-38  | 2.24E-37  |
| Unigene79817  | Potri.015G105300.4 | 67.5672 | 240.9465 | -1.8343 | Down | 1.55E-144 | 5.26E-143 |
| Unigene78264  | Potri.015G007200.1 | 22.4429 | 80.0299  | -1.8343 | Down | 1.20E-47  | 1.12E-46  |
| Unigene2784   | Potri.008G164700.1 | 2.1272  | 7.5866   | -1.8345 | Down | 2.11E-20  | 9.53E-20  |
| Unigene26177  | Potri.004G211500.3 | 11.715  | 41.781   | -1.8345 | Down | 7.82E-30  | 4.73E-29  |
| Unigene93600  | Potri.001G405700.2 | 3.5758  | 12.753   | -1.8345 | Down | 2.11E-20  | 9.53E-20  |
| Unigene32718  | Potri.015G132700.1 | 6.8912  | 24.5797  | -1.8346 | Down | 2.24E-68  | 3.06E-67  |
| Unigene10704  | Potri.010G193400.2 | 11.8591 | 42.299   | -1.8346 | Down | 1.61E-177 | 7.20E-176 |
| Unigene1455   | Potri.005G168600.2 | 5.4766  | 19.5342  | -1.8346 | Down | 2.70E-92  | 5.22E-91  |
| Unigene119560 | Potri.014G143300.1 | 2.253   | 8.037    | -1.8348 | Down | 8.04E-31  | 5.00E-30  |
| Unigene28754  | Potri.003G014800.3 | 3.1141  | 11.1087  | -1.8348 | Down | 3.63E-16  | 1.39E-15  |
| Unigene835    | Potri.019G041900.1 | 6.5023  | 23.1972  | -1.8349 | Down | 5.12E-144 | 1.73E-142 |
| Unigene16124  | Potri.017G090100.4 | 17.8097 | 63.5361  | -1.8349 | Down | 5.10E-36  | 3.63E-35  |
| Unigene43162  | Potri.001G257100.1 | 5.9252  | 21.1391  | -1.835  | Down | 2.15E-21  | 1.00E-20  |
| Unigene1851   | Potri.008G068500.2 | 3.6309  | 12.9548  | -1.8351 | Down | 1.32E-26  | 7.26E-26  |
| Unigene35861  | Potri.007G035200.1 | 14.0286 | 50.0537  | -1.8351 | Down | 9.04E-57  | 1.01E-55  |
| Unigene78841  | Potri.005G223500.1 | 41.0451 | 146.449  | -1.8351 | Down | 7.37E-87  | 1.32E-85  |
| Unigene53752  | Potri.006G080700.3 | 15.1703 | 54.1301  | -1.8352 | Down | 5.26E-37  | 3.84E-36  |
| Unigene90162  | Potri.007G098400.2 | 44.0813 | 157.3025 | -1.8353 | Down | 9.69E-145 | 3.30E-143 |
| Unigene118419 | Potri.010G119600.1 | 2.7189  | 9.703    | -1.8354 | Down | 6.51E-12  | 2.06E-11  |
| Unigene107170 | Potri.002G068300.1 | 0.8612  | 3.0733   | -1.8354 | Down | 1.32E-06  | 3.00E-06  |
| Unigene25574  | Potri.016G047600.2 | 5.8193  | 20.7724  | -1.8358 | Down | 1.39E-28  | 8.10E-28  |
| Unigene106042 | Potri.012G143600.1 | 37.5256 | 133.9507 | -1.8358 | Down | 2.91E-109 | 6.96E-108 |
| Unigene34569  | Potri.004G096900.1 | 2.7494  | 9.8143   | -1.8358 | Down | 1.39E-28  | 8.10E-28  |
| Unigene28446  | Potri.T064300.1    | 10.2835 | 36.7113  | -1.8359 | Down | 5.78E-40  | 4.53E-39  |
| Unigene15000  | Potri.005G094600.3 | 22.2923 | 79.5855  | -1.836  | Down | 2.51E-51  | 2.52E-50  |
| Unigene25045  | Potri.017G068100.4 | 6.1871  | 22.0923  | -1.8362 | Down | 6.52E-13  | 2.16E-12  |
| Unigene20675  | Potri.011G138900.1 | 7.6434  | 27.2921  | -1.8362 | Down | 1.77E-58  | 2.05E-57  |
| Unigene119238 | Potri.010G045900.2 | 2.043   | 7.295    | -1.8362 | Down | 6.52E-13  | 2.16E-12  |
| Unigene54035  | Potri.003G038900.1 | 6.072   | 21.6813  | -1.8362 | Down | 6.52E-13  | 2.16E-12  |
| Unigene22378  | Potri.019G115400.1 | 9.856   | 35.1949  | -1.8363 | Down | 1.76E-93  | 3.45E-92  |
| Unigene87332  | Potri.018G093400.6 | 27.2025 | 97.1356  | -1.8363 | Down | 5.50E-76  | 8.50E-75  |
| Unigene45520  | Potri.007G107300.1 | 6.1305  | 21.8922  | -1.8363 | Down | 1.83E-59  | 2.16E-58  |
| Unigene22737  | Potri.015G077600.1 | 5.8382  | 20.8497  | -1.8364 | Down | 9.59E-37  | 6.97E-36  |
| Unigene35664  | Potri.018G128000.3 | 15.7411 | 56.2224  | -1.8366 | Down | 1.51E-31  | 9.58E-31  |

|               |                    |         |          |         |      |           |           |
|---------------|--------------------|---------|----------|---------|------|-----------|-----------|
| Unigene13642  | Potri.016G022900.1 | 1.6814  | 6.0063   | -1.8368 | Down | 6.55E-14  | 2.27E-13  |
| Unigene16464  | Potri.003G131000.1 | 0.8611  | 3.0761   | -1.8368 | Down | 1.27E-07  | 3.13E-07  |
| Unigene9679   | Potri.001G025100.1 | 1.4673  | 5.2415   | -1.8368 | Down | 1.27E-07  | 3.13E-07  |
| Unigene70562  | Potri.016G134700.4 | 42.5215 | 151.9001 | -1.8369 | Down | 1.00E-75  | 1.54E-74  |
| Unigene110468 | Potri.012G023400.1 | 6.3276  | 22.6042  | -1.8369 | Down | 6.55E-14  | 2.27E-13  |
| Unigene27722  | Potri.012G021500.1 | 2.1475  | 7.6717   | -1.8369 | Down | 1.27E-07  | 3.13E-07  |
| Unigene15975  | Potri.011G077700.3 | 9.4074  | 33.6062  | -1.8369 | Down | 3.86E-20  | 1.73E-19  |
| Unigene18671  | Potri.011G031800.2 | 1.2477  | 4.4572   | -1.8369 | Down | 1.27E-07  | 3.13E-07  |
| Unigene29287  | Potri.006G267900.1 | 2.0423  | 7.2959   | -1.8369 | Down | 6.55E-14  | 2.27E-13  |
| Unigene2477   | Potri.002G050900.1 | 13.1944 | 47.1366  | -1.8369 | Down | 8.25E-120 | 2.22E-118 |
| Unigene13637  | Potri.015G079000.1 | 21.6268 | 77.2638  | -1.837  | Down | 3.22E-264 | 2.39E-262 |
| Unigene39053  | Potri.014G069400.1 | 14.9778 | 53.5109  | -1.837  | Down | 4.74E-52  | 4.83E-51  |
| Unigene55791  | Potri.004G217800.1 | 8.4452  | 30.1768  | -1.8372 | Down | 3.94E-21  | 1.82E-20  |
| Unigene34853  | Potri.001G074000.1 | 5.0292  | 17.9705  | -1.8372 | Down | 3.94E-21  | 1.82E-20  |
| Unigene27541  | Potri.014G066000.4 | 3.24    | 11.5788  | -1.8374 | Down | 6.59E-15  | 2.39E-14  |
| Unigene68893  | Potri.003G148800.1 | 2.8216  | 10.0834  | -1.8374 | Down | 6.59E-15  | 2.39E-14  |
| Unigene3507   | Potri.002G019400.2 | 7.5334  | 26.9221  | -1.8374 | Down | 6.59E-15  | 2.39E-14  |
| Unigene10260  | Potri.010G067500.2 | 7.7045  | 27.5367  | -1.8376 | Down | 4.02E-22  | 1.92E-21  |
| Unigene27710  | Potri.006G138000.1 | 31.036  | 110.9263 | -1.8376 | Down | 6.91E-145 | 2.36E-143 |
| Unigene24552  | Potri.019G053800.2 | 21.7721 | 77.8247  | -1.8377 | Down | 1.20E-43  | 1.02E-42  |
| Unigene29063  | Potri.018G026900.1 | 13.6666 | 48.8495  | -1.8377 | Down | 1.02E-91  | 1.95E-90  |
| Unigene36894  | Potri.010G024500.1 | 6.1699  | 22.0565  | -1.8379 | Down | 6.66E-16  | 2.52E-15  |
| Unigene110612 | Potri.002G142700.1 | 3.6471  | 13.0379  | -1.8379 | Down | 1.24E-08  | 3.25E-08  |
| Unigene20233  | Potri.001G398700.1 | 2.1941  | 7.8436   | -1.8379 | Down | 1.24E-08  | 3.25E-08  |
| Unigene78064  | Potri.001G008400.2 | 24.5476 | 87.7549  | -1.8379 | Down | 8.63E-52  | 8.75E-51  |
| Unigene31868  | Potri.018G095800.3 | 6.3997  | 22.8797  | -1.838  | Down | 2.54E-132 | 7.74E-131 |
| Unigene26441  | Potri.015G069700.1 | 11.5931 | 41.4523  | -1.8382 | Down | 4.20E-24  | 2.14E-23  |
| Unigene21586  | Potri.011G069700.2 | 7.6099  | 27.21    | -1.8382 | Down | 7.37E-114 | 1.86E-112 |
| Unigene11872  | Potri.011G097200.1 | 3.6146  | 12.9256  | -1.8383 | Down | 6.74E-17  | 2.66E-16  |
| Unigene23246  | Potri.009G075700.1 | 10.9398 | 39.1188  | -1.8383 | Down | 5.00E-70  | 7.03E-69  |
| Unigene92063  | Potri.006G170700.1 | 36.6408 | 131.0233 | -1.8383 | Down | 2.48E-146 | 8.60E-145 |
| Unigene11592  | Potri.004G203500.3 | 3.9073  | 13.9723  | -1.8383 | Down | 1.37E-47  | 1.27E-46  |
| Unigene9384   | Potri.001G144800.3 | 5.9226  | 21.1787  | -1.8383 | Down | 6.74E-17  | 2.66E-16  |
| Unigene32096  | Potri.002G261900.1 | 15.2623 | 54.5829  | -1.8385 | Down | 5.22E-135 | 1.63E-133 |
| Unigene102710 | Potri.016G118300.5 | 2.4033  | 8.5963   | -1.8387 | Down | 1.22E-09  | 3.40E-09  |
| Unigene9836   | Potri.006G071900.1 | 2.2097  | 7.9037   | -1.8387 | Down | 1.22E-09  | 3.40E-09  |
| Unigene37737  | Potri.003G011300.1 | 28.4729 | 101.8434 | -1.8387 | Down | 8.14E-67  | 1.09E-65  |
| Unigene118830 | Potri.001G152100.3 | 1.865   | 6.6707   | -1.8387 | Down | 1.22E-09  | 3.40E-09  |
| Unigene87676  | Potri.010G015200.3 | 26.6592 | 95.3611  | -1.8388 | Down | 6.26E-76  | 9.67E-75  |

|               |                    |         |          |         |      |           |           |
|---------------|--------------------|---------|----------|---------|------|-----------|-----------|
| Unigene18903  | Potri.005G080500.2 | 18.4673 | 66.0579  | -1.8388 | Down | 4.68E-84  | 8.10E-83  |
| Unigene41694  | Potri.015G079000.1 | 6.2166  | 22.2409  | -1.839  | Down | 6.95E-19  | 2.97E-18  |
| Unigene18210  | Potri.012G047200.2 | 3.6677  | 13.1217  | -1.839  | Down | 6.95E-19  | 2.97E-18  |
| Unigene108564 | Potri.004G163700.1 | 14.5253 | 51.9703  | -1.8391 | Down | 4.63E-28  | 2.66E-27  |
| Unigene22145  | Potri.002G135400.1 | 1.8037  | 6.4536   | -1.8391 | Down | 4.63E-28  | 2.66E-27  |
| Unigene44164  | Potri.015G053400.2 | 3.0695  | 10.9838  | -1.8393 | Down | 3.39E-38  | 2.55E-37  |
| Unigene103117 | Potri.013G094400.2 | 1.7349  | 6.208    | -1.8393 | Down | 1.20E-10  | 3.56E-10  |
| Unigene74351  | Potri.012G142400.3 | 4.8576  | 17.3824  | -1.8393 | Down | 1.20E-10  | 3.56E-10  |
| Unigene31080  | Potri.004G174700.1 | 3.4813  | 12.4574  | -1.8393 | Down | 1.20E-10  | 3.56E-10  |
| Unigene4832   | Potri.004G141300.1 | 2.4749  | 8.856    | -1.8393 | Down | 1.20E-10  | 3.56E-10  |
| Unigene52674  | Potri.003G157500.1 | 1.9668  | 7.0381   | -1.8393 | Down | 1.20E-10  | 3.56E-10  |
| Unigene611    | Potri.009G079800.1 | 39.1953 | 140.2653 | -1.8394 | Down | 1.16E-270 | 8.93E-269 |
| Unigene22161  | Potri.008G124700.1 | 20.8902 | 74.7601  | -1.8394 | Down | 4.62E-114 | 1.17E-112 |
| Unigene34252  | Potri.006G050700.1 | 22.7302 | 81.3413  | -1.8394 | Down | 1.76E-149 | 6.27E-148 |
| Unigene48548  | Potri.003G070100.3 | 14.1857 | 50.7659  | -1.8394 | Down | 2.58E-48  | 2.44E-47  |
| Unigene7428   | Potri.019G077700.3 | 2.3894  | 8.5519   | -1.8396 | Down | 7.20E-21  | 3.30E-20  |
| Unigene32143  | Potri.013G148500.1 | 6.5693  | 23.5126  | -1.8396 | Down | 8.40E-99  | 1.78E-97  |
| Unigene32257  | Potri.012G130700.1 | 4.0622  | 14.5386  | -1.8396 | Down | 1.28E-78  | 2.05E-77  |
| Unigene21271  | Potri.012G096700.2 | 5.1229  | 18.3355  | -1.8396 | Down | 1.03E-88  | 1.90E-87  |
| Unigene105512 | Potri.008G150500.2 | 3.201   | 11.4564  | -1.8396 | Down | 3.61E-40  | 2.84E-39  |
| Unigene51202  | Potri.002G040700.1 | 57.7141 | 206.5787 | -1.8397 | Down | 1.24E-198 | 6.40E-197 |
| Unigene6250   | Potri.015G034700.1 | 4.8179  | 17.2462  | -1.8398 | Down | 1.20E-11  | 3.74E-11  |
| Unigene33683  | Potri.014G149600.1 | 3.5145  | 12.5808  | -1.8398 | Down | 7.35E-22  | 3.48E-21  |
| Unigene47800  | Potri.011G077100.2 | 22.9422 | 82.1245  | -1.8398 | Down | 2.96E-52  | 3.03E-51  |
| Unigene38542  | Potri.002G083200.8 | 2.9878  | 10.6953  | -1.8398 | Down | 1.20E-11  | 3.74E-11  |
| Unigene119492 | Potri.008G058700.2 | 1.2919  | 4.6247   | -1.8399 | Down | 1.20E-11  | 3.74E-11  |
| Unigene23236  | Potri.002G260700.2 | 11.9321 | 42.7158  | -1.8399 | Down | 3.98E-43  | 3.36E-42  |
| Unigene49204  | Potri.002G260700.2 | 7.8819  | 28.2166  | -1.8399 | Down | 3.98E-43  | 3.36E-42  |
| Unigene11767  | Potri.005G053700.1 | 5.1503  | 18.4383  | -1.84   | Down | 3.18E-54  | 3.38E-53  |
| Unigene23976  | Potri.013G071800.2 | 10.5274 | 37.692   | -1.8401 | Down | 2.24E-77  | 3.53E-76  |
| Unigene32812  | Potri.019G084100.1 | 5.2695  | 18.8681  | -1.8402 | Down | 5.64E-35  | 3.91E-34  |
| Unigene71722  | Potri.008G058300.1 | 18.6498 | 66.7784  | -1.8402 | Down | 5.64E-35  | 3.91E-34  |
| Unigene73884  | Potri.009G099300.2 | 38.8756 | 139.2332 | -1.8406 | Down | 3.63E-74  | 5.45E-73  |
| Unigene33974  | Potri.002G036800.1 | 12.7983 | 45.8372  | -1.8406 | Down | 3.63E-74  | 5.45E-73  |
| Unigene38514  | Potri.018G082100.1 | 5.6537  | 20.2508  | -1.8407 | Down | 8.25E-27  | 4.56E-26  |
| Unigene62397  | Potri.013G053500.1 | 2.5118  | 8.9977   | -1.8408 | Down | 1.21E-14  | 4.34E-14  |
| Unigene23542  | Potri.005G043500.1 | 1.4599  | 5.2296   | -1.8408 | Down | 1.21E-14  | 4.34E-14  |
| Unigene48417  | Potri.004G156000.2 | 5.0067  | 17.935   | -1.8408 | Down | 1.21E-14  | 4.34E-14  |
| Unigene32606  | Potri.T146500.2    | 35.1744 | 126.0031 | -1.8409 | Down | 2.90E-158 | 1.11E-156 |

|               |                    |         |          |         |      |           |           |
|---------------|--------------------|---------|----------|---------|------|-----------|-----------|
| Unigene14257  | Potri.008G125800.1 | 14.0753 | 50.4211  | -1.8409 | Down | 8.46E-28  | 4.82E-27  |
| Unigene23618  | Potri.005G250300.1 | 6.282   | 22.5037  | -1.8409 | Down | 8.46E-28  | 4.82E-27  |
| Unigene94097  | Potri.006G128800.1 | 2.1645  | 7.755    | -1.8411 | Down | 1.22E-15  | 4.57E-15  |
| Unigene24469  | Potri.004G033800.1 | 3.7827  | 13.553   | -1.8411 | Down | 1.22E-15  | 4.57E-15  |
| Unigene44191  | Potri.006G123700.1 | 4.9621  | 17.78    | -1.8412 | Down | 7.17E-60  | 8.51E-59  |
| Unigene9823   | Potri.001G081600.1 | 8.5558  | 30.6568  | -1.8412 | Down | 9.17E-31  | 5.69E-30  |
| Unigene43645  | Potri.004G112400.1 | 2.7674  | 9.9167   | -1.8413 | Down | 1.24E-16  | 4.83E-16  |
| Unigene10741  | Potri.006G083700.2 | 13.2337 | 47.424   | -1.8414 | Down | 9.03E-171 | 3.84E-169 |
| Unigene10247  | Potri.003G063000.8 | 20.1333 | 72.1507  | -1.8414 | Down | 8.29E-64  | 1.06E-62  |
| Unigene493    | Potri.016G029200.1 | 4.2803  | 15.34    | -1.8415 | Down | 1.25E-17  | 5.10E-17  |
| Unigene106953 | Potri.010G033400.1 | 1.9118  | 6.8517   | -1.8415 | Down | 1.25E-17  | 5.10E-17  |
| Unigene79438  | Potri.009G115300.1 | 7.5524  | 27.0669  | -1.8415 | Down | 1.25E-17  | 5.10E-17  |
| Unigene948    | Potri.012G007400.1 | 3.4585  | 12.3968  | -1.8417 | Down | 1.09E-36  | 7.93E-36  |
| Unigene21187  | Potri.008G148300.1 | 4.7655  | 17.0812  | -1.8417 | Down | 1.27E-18  | 5.38E-18  |
| Unigene41870  | Potri.003G213200.2 | 5.4027  | 19.365   | -1.8417 | Down | 1.27E-18  | 5.38E-18  |
| Unigene2591   | Potri.002G083900.1 | 1.7794  | 6.378    | -1.8417 | Down | 1.27E-18  | 5.38E-18  |
| Unigene50656  | Potri.005G065100.1 | 3.2615  | 11.6914  | -1.8418 | Down | 1.29E-19  | 5.68E-19  |
| Unigene8341   | Potri.019G133000.1 | 11.248  | 40.3245  | -1.842  | Down | 1.26E-58  | 1.46E-57  |
| Unigene7389   | Potri.007G017300.1 | 4.4977  | 16.1242  | -1.842  | Down | 1.32E-20  | 5.99E-20  |
| Unigene5451   | Potri.004G105200.1 | 2.3958  | 8.5889   | -1.842  | Down | 1.32E-20  | 5.99E-20  |
| Unigene37420  | Potri.016G093100.1 | 29.9729 | 107.4595 | -1.8421 | Down | 1.35E-60  | 1.63E-59  |
| Unigene22309  | Potri.001G117000.1 | 13.4363 | 48.1766  | -1.8422 | Down | 2.29E-105 | 5.21E-104 |
| Unigene28895  | Potri.015G067200.1 | 7.0717  | 25.3585  | -1.8423 | Down | 1.82E-68  | 2.49E-67  |
| Unigene47540  | Potri.019G039900.1 | 11.2059 | 40.1852  | -1.8424 | Down | 1.43E-24  | 7.41E-24  |
| Unigene3803   | Potri.016G029200.1 | 8.8405  | 31.7046  | -1.8425 | Down | 1.47E-25  | 7.82E-25  |
| Unigene119541 | Potri.006G153600.1 | 5.0983  | 18.2853  | -1.8426 | Down | 1.85E-52  | 1.91E-51  |
| Unigene444    | Potri.004G035600.1 | 10.887  | 39.0479  | -1.8426 | Down | 0         | 0         |
| Unigene36208  | Potri.009G106600.2 | 18.9973 | 68.1401  | -1.8427 | Down | 2.06E-55  | 2.25E-54  |
| Unigene11010  | Potri.010G087700.3 | 8.4597  | 30.346   | -1.8428 | Down | 2.38E-59  | 2.79E-58  |
| Unigene25415  | Potri.005G109400.1 | 12.2593 | 43.9789  | -1.8429 | Down | 1.77E-32  | 1.15E-31  |
| Unigene7301   | Potri.009G100100.2 | 19.572  | 70.2137  | -1.843  | Down | 2.85E-64  | 3.65E-63  |
| Unigene18537  | Potri.001G296800.1 | 5.0886  | 18.256   | -1.843  | Down | 1.88E-34  | 1.28E-33  |
| Unigene32267  | Potri.006G235800.1 | 5.3215  | 19.0928  | -1.8431 | Down | 8.55E-108 | 2.00E-106 |
| Unigene48763  | Potri.019G018400.1 | 11.7347 | 42.1042  | -1.8432 | Down | 2.12E-38  | 1.60E-37  |
| Unigene42879  | Potri.009G155200.6 | 9.2611  | 33.2301  | -1.8432 | Down | 8.50E-192 | 4.21E-190 |
| Unigene41721  | Potri.004G227000.1 | 23.0348 | 82.6472  | -1.8432 | Down | 3.98E-73  | 5.88E-72  |
| Unigene28060  | Potri.002G011300.1 | 6.1016  | 21.8932  | -1.8432 | Down | 2.19E-39  | 1.69E-38  |
| Unigene6552   | Potri.010G217500.3 | 11.3084 | 40.5782  | -1.8433 | Down | 2.41E-42  | 2.00E-41  |
| Unigene41109  | Potri.018G028900.1 | 13.4742 | 48.3568  | -1.8435 | Down | 3.26E-51  | 3.26E-50  |

|               |                    |         |         |         |      |           |           |
|---------------|--------------------|---------|---------|---------|------|-----------|-----------|
| Unigene18219  | Potri.015G144400.2 | 7.2476  | 26.011  | -1.8435 | Down | 3.50E-53  | 3.64E-52  |
| Unigene21982  | Potri.016G001000.1 | 3.9947  | 14.337  | -1.8436 | Down | 3.89E-56  | 4.30E-55  |
| Unigene48     | Potri.018G142300.1 | 3.3885  | 12.1644 | -1.8439 | Down | 1.34E-88  | 2.46E-87  |
| Unigene34447  | Potri.005G216200.2 | 16.6438 | 59.7521 | -1.844  | Down | 2.32E-102 | 5.10E-101 |
| Unigene31905  | Potri.002G163000.1 | 19.7323 | 70.8406 | -1.844  | Down | 1.18E-210 | 6.52E-209 |
| Unigene32213  | Potri.002G158800.1 | 9.1337  | 32.7935 | -1.8441 | Down | 1.21E-142 | 4.05E-141 |
| Unigene68234  | Potri.T081800.1    | 2.3232  | 8.3429  | -1.8444 | Down | 2.21E-13  | 7.49E-13  |
| Unigene106317 | Potri.016G094700.5 | 1.4767  | 5.303   | -1.8444 | Down | 2.22E-10  | 6.47E-10  |
| Unigene39208  | Potri.016G042500.1 | 1.8496  | 6.6422  | -1.8444 | Down | 2.21E-13  | 7.49E-13  |
| Unigene22822  | Potri.010G210900.1 | 1.5986  | 5.7407  | -1.8444 | Down | 2.46E-06  | 5.47E-06  |
| Unigene117246 | Potri.009G100100.4 | 1.2716  | 4.5665  | -1.8444 | Down | 2.61E-05  | 5.30E-05  |
| Unigene29876  | Potri.006G239200.1 | 1.8902  | 6.788   | -1.8444 | Down | 2.46E-06  | 5.47E-06  |
| Unigene41983  | Potri.005G066600.1 | 2.2003  | 7.9016  | -1.8444 | Down | 2.29E-08  | 5.93E-08  |
| Unigene14831  | Potri.001G380900.2 | 0.8794  | 3.158   | -1.8444 | Down | 2.61E-05  | 5.30E-05  |
| Unigene45999  | Potri.019G055000.2 | 9.446   | 33.9226 | -1.8445 | Down | 2.82E-27  | 1.58E-26  |
| Unigene52058  | Potri.018G106700.2 | 1.097   | 3.9397  | -1.8445 | Down | 2.61E-05  | 5.30E-05  |
| Unigene108376 | Potri.018G002900.1 | 4.8652  | 17.4718 | -1.8445 | Down | 2.22E-10  | 6.47E-10  |
| Unigene11600  | Potri.017G043400.1 | 3.2304  | 11.6012 | -1.8445 | Down | 3.75E-37  | 2.75E-36  |
| Unigene117216 | Potri.017G010800.1 | 1.2788  | 4.5926  | -1.8445 | Down | 2.61E-05  | 5.30E-05  |
| Unigene116907 | Potri.015G045600.1 | 1.6602  | 5.9622  | -1.8445 | Down | 2.46E-06  | 5.47E-06  |
| Unigene75465  | Potri.014G177800.2 | 5.0633  | 18.1834 | -1.8445 | Down | 2.21E-11  | 6.79E-11  |
| Unigene13322  | Potri.012G029700.1 | 0.9709  | 3.4868  | -1.8445 | Down | 2.61E-05  | 5.30E-05  |
| Unigene61187  | Potri.011G092700.1 | 2.7404  | 9.8413  | -1.8445 | Down | 2.36E-07  | 5.69E-07  |
| Unigene52345  | Potri.011G022300.3 | 1.6113  | 5.7867  | -1.8445 | Down | 2.22E-10  | 6.47E-10  |
| Unigene37814  | Potri.010G252900.7 | 1.519   | 5.455   | -1.8445 | Down | 2.84E-04  | 5.18E-04  |
| Unigene67075  | Potri.010G195900.2 | 1.7149  | 6.1587  | -1.8445 | Down | 2.61E-05  | 5.30E-05  |
| Unigene42087  | Potri.010G164700.3 | 1.233   | 4.4281  | -1.8445 | Down | 2.61E-05  | 5.30E-05  |
| Unigene12389  | Potri.010G164200.1 | 5.4452  | 19.5548 | -1.8445 | Down | 2.46E-21  | 1.14E-20  |
| Unigene58436  | Potri.010G068900.1 | 3.2124  | 11.5364 | -1.8445 | Down | 2.36E-07  | 5.69E-07  |
| Unigene102771 | Potri.009G081600.7 | 1.8966  | 6.8111  | -1.8445 | Down | 2.46E-06  | 5.47E-06  |
| Unigene2547   | Potri.008G203900.1 | 3.5724  | 12.8291 | -1.8445 | Down | 3.53E-35  | 2.45E-34  |
| Unigene19605  | Potri.008G164700.1 | 0.9702  | 3.4843  | -1.8445 | Down | 2.84E-04  | 5.18E-04  |
| Unigene89928  | Potri.008G105200.1 | 0.9122  | 3.276   | -1.8445 | Down | 2.84E-04  | 5.18E-04  |
| Unigene41010  | Potri.008G078900.1 | 2.1758  | 7.8138  | -1.8445 | Down | 2.29E-08  | 5.93E-08  |
| Unigene85795  | Potri.008G048900.2 | 8.7839  | 31.5447 | -1.8445 | Down | 2.62E-24  | 1.34E-23  |
| Unigene107124 | Potri.007G113300.1 | 1.6841  | 6.0479  | -1.8445 | Down | 2.22E-10  | 6.47E-10  |
| Unigene16339  | Potri.007G003900.2 | 1.1447  | 4.111   | -1.8445 | Down | 2.61E-05  | 5.30E-05  |
| Unigene40960  | Potri.006G264500.1 | 4.0143  | 14.4162 | -1.8445 | Down | 2.25E-09  | 6.19E-09  |
| Unigene50559  | Potri.006G247300.6 | 12.947  | 46.4953 | -1.8445 | Down | 4.53E-43  | 3.82E-42  |

|               |                    |         |          |         |      |           |           |
|---------------|--------------------|---------|----------|---------|------|-----------|-----------|
| Unigene63299  | Potri.006G247100.1 | 0.8652  | 3.1071   | -1.8445 | Down | 2.84E-04  | 5.18E-04  |
| Unigene79170  | Potri.006G190200.2 | 11.6077 | 41.6859  | -1.8445 | Down | 2.75E-26  | 1.50E-25  |
| Unigene1966   | Potri.006G069600.1 | 2.1401  | 7.6857   | -1.8445 | Down | 2.24E-15  | 8.30E-15  |
| Unigene9164   | Potri.005G255300.1 | 3.0496  | 10.9519  | -1.8445 | Down | 2.22E-14  | 7.87E-14  |
| Unigene117488 | Potri.005G122600.1 | 2.4526  | 8.8077   | -1.8445 | Down | 2.25E-09  | 6.19E-09  |
| Unigene48351  | Potri.005G120400.3 | 2.6749  | 9.606    | -1.8445 | Down | 2.21E-13  | 7.49E-13  |
| Unigene7408   | Potri.005G105400.1 | 1.8244  | 6.5519   | -1.8445 | Down | 2.22E-10  | 6.47E-10  |
| Unigene42960  | Potri.004G085000.1 | 6.0771  | 21.8243  | -1.8445 | Down | 5.18E-47  | 4.75E-46  |
| Unigene29724  | Potri.003G135000.1 | 12.1825 | 43.75    | -1.8445 | Down | 2.89E-28  | 1.67E-27  |
| Unigene29711  | Potri.003G118000.2 | 0.9286  | 3.3349   | -1.8445 | Down | 2.61E-05  | 5.30E-05  |
| Unigene6526   | Potri.003G053200.3 | 1.9367  | 6.9551   | -1.8445 | Down | 2.22E-10  | 6.47E-10  |
| Unigene96521  | Potri.003G038500.2 | 1.39    | 4.992    | -1.8445 | Down | 2.61E-05  | 5.30E-05  |
| Unigene35670  | Potri.003G023300.1 | 23.6709 | 85.0072  | -1.8445 | Down | 7.07E-56  | 7.79E-55  |
| Unigene34318  | Potri.002G187100.2 | 8.1913  | 29.4166  | -1.8445 | Down | 7.33E-57  | 8.22E-56  |
| Unigene117170 | Potri.002G099100.1 | 1.2862  | 4.619    | -1.8445 | Down | 2.61E-05  | 5.30E-05  |
| Unigene115924 | Potri.002G097700.2 | 1.4772  | 5.305    | -1.8445 | Down | 2.61E-05  | 5.30E-05  |
| Unigene116671 | Potri.002G038300.3 | 1.3646  | 4.9006   | -1.8445 | Down | 2.61E-05  | 5.30E-05  |
| Unigene6512   | Potri.001G455400.1 | 1.1929  | 4.2841   | -1.8445 | Down | 2.46E-06  | 5.47E-06  |
| Unigene8937   | Potri.001G423100.1 | 1.3522  | 4.8562   | -1.8445 | Down | 2.61E-05  | 5.30E-05  |
| Unigene117886 | Potri.001G013800.1 | 1.4346  | 5.1519   | -1.8445 | Down | 2.46E-06  | 5.47E-06  |
| Unigene42063  | Potri.001G012300.1 | 2.0188  | 7.2499   | -1.8445 | Down | 2.29E-08  | 5.93E-08  |
| Unigene10891  | Potri.002G188700.4 | 6.8988  | 24.7819  | -1.8449 | Down | 1.57E-119 | 4.21E-118 |
| Unigene4562   | Potri.002G262300.2 | 32.2248 | 115.7717 | -1.845  | Down | 3.94E-85  | 6.93E-84  |
| Unigene43147  | Potri.008G181500.2 | 7.4599  | 26.8013  | -1.8451 | Down | 3.25E-80  | 5.35E-79  |
| Unigene88454  | Potri.001G356900.6 | 53.5411 | 192.358  | -1.8451 | Down | 1.47E-158 | 5.65E-157 |
| Unigene39317  | Potri.013G041500.1 | 8.0835  | 29.0503  | -1.8455 | Down | 9.75E-48  | 9.10E-47  |
| Unigene53065  | Potri.008G144100.2 | 25.9321 | 93.1914  | -1.8455 | Down | 1.04E-49  | 1.01E-48  |
| Unigene11648  | Potri.004G167400.1 | 14.0923 | 50.6514  | -1.8457 | Down | 5.69E-79  | 9.19E-78  |
| Unigene37900  | Potri.017G058300.3 | 12.9016 | 46.3781  | -1.8459 | Down | 6.43E-35  | 4.44E-34  |
| Unigene22340  | Potri.001G472000.1 | 9.5966  | 34.497   | -1.8459 | Down | 2.74E-103 | 6.09E-102 |
| Unigene42030  | Potri.015G111200.1 | 13.3715 | 48.0706  | -1.846  | Down | 3.24E-64  | 4.15E-63  |
| Unigene16979  | Potri.006G235400.1 | 9.7145  | 34.9242  | -1.846  | Down | 3.13E-63  | 3.93E-62  |
| Unigene35563  | Potri.006G193600.2 | 13.3524 | 48.0033  | -1.846  | Down | 5.89E-32  | 3.78E-31  |
| Unigene80170  | Potri.003G200600.7 | 27.444  | 98.6661  | -1.8461 | Down | 2.91E-61  | 3.53E-60  |
| Unigene88813  | Potri.013G002100.1 | 35.987  | 129.394  | -1.8462 | Down | 6.58E-110 | 1.59E-108 |
| Unigene42406  | Potri.003G140700.7 | 8.2802  | 29.7707  | -1.8462 | Down | 4.75E-143 | 1.59E-141 |
| Unigene26948  | Potri.002G234700.1 | 22.5179 | 80.9657  | -1.8462 | Down | 2.34E-55  | 2.55E-54  |
| Unigene46469  | Potri.002G114200.1 | 8.5256  | 30.6556  | -1.8463 | Down | 5.28E-28  | 3.03E-27  |
| Unigene78617  | Potri.013G111500.5 | 21.7842 | 78.3443  | -1.8465 | Down | 1.78E-47  | 1.65E-46  |

|               |                    |         |          |         |      |          |          |
|---------------|--------------------|---------|----------|---------|------|----------|----------|
| Unigene48667  | Potri.007G090400.1 | 26.1277 | 93.9596  | -1.8465 | Down | 1.90E-49 | 1.84E-48 |
| Unigene29447  | Potri.006G199000.2 | 4.4729  | 16.0904  | -1.8469 | Down | 4.49E-21 | 2.07E-20 |
| Unigene49134  | Potri.018G102500.1 | 4.3426  | 15.6229  | -1.847  | Down | 4.41E-20 | 1.97E-19 |
| Unigene43774  | Potri.014G096700.1 | 16.1446 | 58.0786  | -1.847  | Down | 4.92E-59 | 5.75E-58 |
| Unigene13091  | Potri.014G042000.1 | 3.1425  | 11.3048  | -1.847  | Down | 1.37E-39 | 1.06E-38 |
| Unigene74213  | Potri.010G104500.1 | 19.9509 | 71.7726  | -1.847  | Down | 1.37E-39 | 1.06E-38 |
| Unigene35801  | Potri.001G197300.1 | 4.824   | 17.3548  | -1.847  | Down | 1.32E-38 | 1.00E-37 |
| Unigene6547   | Potri.018G013400.2 | 6.7241  | 24.1931  | -1.8472 | Down | 4.33E-19 | 1.86E-18 |
| Unigene8297   | Potri.008G124000.3 | 2.7266  | 9.8113   | -1.8473 | Down | 4.26E-18 | 1.77E-17 |
| Unigene27012  | Potri.001G361600.2 | 12.7101 | 45.7342  | -1.8473 | Down | 3.84E-52 | 3.92E-51 |
| Unigene13600  | Potri.006G190000.4 | 1.9447  | 6.9978   | -1.8474 | Down | 4.26E-18 | 1.77E-17 |
| Unigene20248  | Potri.006G120200.1 | 3.2776  | 11.7943  | -1.8474 | Down | 4.26E-18 | 1.77E-17 |
| Unigene22688  | Potri.019G018500.5 | 13.1071 | 47.1707  | -1.8475 | Down | 1.07E-63 | 1.36E-62 |
| Unigene20300  | Potri.013G080700.1 | 2.4413  | 8.7854   | -1.8475 | Down | 1.14E-33 | 7.62E-33 |
| Unigene18094  | Potri.004G066200.3 | 5.8639  | 21.1021  | -1.8475 | Down | 1.14E-33 | 7.62E-33 |
| Unigene27241  | Potri.005G094400.1 | 27.5997 | 99.3318  | -1.8476 | Down | 1.11E-92 | 2.15E-91 |
| Unigene26013  | Potri.003G005700.3 | 26.0393 | 93.7149  | -1.8476 | Down | 1.03E-62 | 1.29E-61 |
| Unigene43449  | Potri.003G117000.2 | 2.8199  | 10.1499  | -1.8477 | Down | 1.04E-30 | 6.47E-30 |
| Unigene27969  | Potri.003G047600.1 | 6.8288  | 24.5793  | -1.8477 | Down | 3.02E-45 | 2.67E-44 |
| Unigene102631 | Potri.002G229100.2 | 5.2602  | 18.9334  | -1.8477 | Down | 4.15E-16 | 1.59E-15 |
| Unigene93256  | Potri.006G184300.1 | 2.7704  | 9.9735   | -1.848  | Down | 4.11E-15 | 1.50E-14 |
| Unigene53314  | Potri.005G191900.1 | 4.8091  | 17.3125  | -1.848  | Down | 4.11E-15 | 1.50E-14 |
| Unigene9928   | Potri.017G155300.6 | 9.4143  | 33.8942  | -1.8481 | Down | 9.64E-28 | 5.48E-27 |
| Unigene45475  | Potri.014G179300.2 | 4.4281  | 15.9426  | -1.8481 | Down | 2.18E-66 | 2.90E-65 |
| Unigene50229  | Potri.002G106500.1 | 4.0365  | 14.5327  | -1.8481 | Down | 9.64E-28 | 5.48E-27 |
| Unigene10676  | Potri.013G145300.1 | 3.7379  | 13.4582  | -1.8482 | Down | 6.46E-79 | 1.04E-77 |
| Unigene72246  | Potri.006G130500.2 | 6.8805  | 24.7744  | -1.8483 | Down | 4.08E-14 | 1.43E-13 |
| Unigene81722  | Potri.009G165200.3 | 42.5448 | 153.2061 | -1.8484 | Down | 4.64E-98 | 9.70E-97 |
| Unigene18815  | Potri.001G424500.1 | 6.8759  | 24.7606  | -1.8484 | Down | 9.17E-26 | 4.91E-25 |
| Unigene12979  | Potri.011G123900.1 | 18.574  | 66.8937  | -1.8486 | Down | 1.37E-82 | 2.32E-81 |
| Unigene27231  | Potri.010G073700.1 | 6.3994  | 23.0474  | -1.8486 | Down | 4.06E-13 | 1.36E-12 |
| Unigene23826  | Potri.009G167000.1 | 5.1764  | 18.6422  | -1.8486 | Down | 1.42E-83 | 2.45E-82 |
| Unigene21704  | Potri.006G238200.1 | 10.4551 | 37.6547  | -1.8486 | Down | 0        | 0        |
| Unigene21469  | Potri.006G020600.2 | 2.5048  | 9.0209   | -1.8486 | Down | 1.69E-59 | 1.99E-58 |
| Unigene53587  | Potri.018G066200.1 | 5.4752  | 19.7239  | -1.849  | Down | 4.05E-12 | 1.29E-11 |
| Unigene84008  | Potri.017G054400.2 | 13.0209 | 46.9071  | -1.849  | Down | 2.07E-33 | 1.38E-32 |
| Unigene62244  | Potri.016G000200.2 | 3.0294  | 10.9132  | -1.849  | Down | 8.56E-23 | 4.17E-22 |
| Unigene12880  | Potri.011G010200.1 | 5.2427  | 18.8865  | -1.849  | Down | 2.07E-33 | 1.38E-32 |
| Unigene104524 | Potri.006G177100.3 | 1.3426  | 4.8367   | -1.849  | Down | 4.05E-12 | 1.29E-11 |



|               |                    |         |          |         |      |           |           |
|---------------|--------------------|---------|----------|---------|------|-----------|-----------|
| Unigene12093  | Potri.001G315600.1 | 3.9853  | 14.3567  | -1.849  | Down | 8.56E-23  | 4.17E-22  |
| Unigene16175  | Potri.014G137200.1 | 6.9043  | 24.8745  | -1.8491 | Down | 5.71E-115 | 1.46E-113 |
| Unigene11336  | Potri.006G062000.1 | 8.6721  | 31.244   | -1.8491 | Down | 7.21E-94  | 1.42E-92  |
| Unigene2280   | Potri.014G087300.1 | 7.7194  | 27.8152  | -1.8493 | Down | 4.83E-41  | 3.89E-40  |
| Unigene21425  | Potri.003G189500.2 | 2.5847  | 9.3141   | -1.8494 | Down | 8.21E-21  | 3.75E-20  |
| Unigene60531  | Potri.001G059500.3 | 2.228   | 8.0288   | -1.8494 | Down | 8.21E-21  | 3.75E-20  |
| Unigene10571  | Potri.009G037000.5 | 3.642   | 13.1245  | -1.8495 | Down | 4.06E-11  | 1.23E-10  |
| Unigene340    | Potri.009G080800.3 | 9.0883  | 32.7544  | -1.8496 | Down | 2.60E-122 | 7.17E-121 |
| Unigene76593  | Potri.015G109300.3 | 40.4215 | 145.6935 | -1.8497 | Down | 4.71E-83  | 8.03E-82  |
| Unigene93407  | Potri.008G109300.1 | 3.5802  | 12.9041  | -1.8497 | Down | 8.06E-20  | 3.57E-19  |
| Unigene17430  | Potri.013G007800.5 | 8.4867  | 30.5904  | -1.8498 | Down | 1.81E-28  | 1.05E-27  |
| Unigene29011  | Potri.011G087500.1 | 18.6213 | 67.1185  | -1.8498 | Down | 8.49E-110 | 2.05E-108 |
| Unigene16119  | Potri.005G167900.1 | 26.3621 | 95.0244  | -1.8498 | Down | 6.70E-64  | 8.54E-63  |
| Unigene10067  | Potri.002G167200.1 | 10.0374 | 36.18    | -1.8498 | Down | 1.81E-28  | 1.05E-27  |
| Unigene40602  | Potri.004G163800.2 | 18.3735 | 66.2312  | -1.8499 | Down | 1.04E-45  | 9.25E-45  |
| Unigene30808  | Potri.019G037900.1 | 7.7999  | 28.1189  | -1.85   | Down | 1.76E-27  | 9.92E-27  |
| Unigene38891  | Potri.014G073400.4 | 3.6096  | 13.0128  | -1.85   | Down | 1.76E-27  | 9.92E-27  |
| Unigene48395  | Potri.004G091800.3 | 3.8031  | 13.7102  | -1.85   | Down | 4.09E-10  | 1.18E-09  |
| Unigene46539  | Potri.007G096200.1 | 31.5173 | 113.6241 | -1.8501 | Down | 1.19E-129 | 3.52E-128 |
| Unigene92397  | Potri.009G117300.1 | 72.7854 | 262.4357 | -1.8502 | Down | 1.40E-306 | 1.27E-304 |
| Unigene82386  | Potri.006G077800.1 | 7.0026  | 25.2505  | -1.8503 | Down | 7.80E-18  | 3.20E-17  |
| Unigene22137  | Potri.003G120800.4 | 4.6286  | 16.6896  | -1.8503 | Down | 3.47E-75  | 5.29E-74  |
| Unigene22720  | Potri.002G006200.3 | 20.3275 | 73.2974  | -1.8503 | Down | 6.15E-140 | 2.01E-138 |
| Unigene25886  | Potri.001G407800.1 | 57.2572 | 206.458  | -1.8503 | Down | 4.85E-197 | 2.48E-195 |
| Unigene16210  | Potri.012G020000.1 | 15.143  | 54.6107  | -1.8505 | Down | 3.78E-33  | 2.50E-32  |
| Unigene39348  | Potri.003G195300.1 | 5.6786  | 20.479   | -1.8505 | Down | 3.78E-33  | 2.50E-32  |
| Unigene8353   | Potri.016G010300.1 | 2.1367  | 7.7068   | -1.8507 | Down | 7.69E-17  | 3.03E-16  |
| Unigene106254 | Potri.011G164500.1 | 1.0697  | 3.8582   | -1.8507 | Down | 4.15E-09  | 1.12E-08  |
| Unigene43539  | Potri.010G223400.1 | 2.1235  | 7.6591   | -1.8507 | Down | 7.69E-17  | 3.03E-16  |
| Unigene102877 | Potri.006G206100.1 | 3.6198  | 13.056   | -1.8507 | Down | 4.15E-09  | 1.12E-08  |
| Unigene17395  | Potri.006G034900.1 | 1.7437  | 6.2891   | -1.8507 | Down | 4.15E-09  | 1.12E-08  |
| Unigene62868  | Potri.003G148200.1 | 3.1951  | 11.5242  | -1.8507 | Down | 7.69E-17  | 3.03E-16  |
| Unigene102288 | Potri.014G161600.2 | 1.5024  | 5.419    | -1.8508 | Down | 4.15E-09  | 1.12E-08  |
| Unigene81398  | Potri.006G232300.4 | 29.9571 | 108.0571 | -1.8508 | Down | 2.77E-69  | 3.85E-68  |
| Unigene32763  | Potri.019G034300.2 | 25.2674 | 91.1532  | -1.851  | Down | 1.29E-154 | 4.82E-153 |
| Unigene24077  | Potri.001G454400.2 | 22.5841 | 81.4714  | -1.851  | Down | 6.31E-75  | 9.59E-74  |
| Unigene22694  | Potri.010G191800.2 | 22.0406 | 79.518   | -1.8511 | Down | 2.48E-66  | 3.29E-65  |
| Unigene54295  | Potri.011G042400.1 | 1.2739  | 4.5962   | -1.8512 | Down | 7.60E-16  | 2.87E-15  |
| Unigene37946  | Potri.010G098700.1 | 7.6013  | 27.425   | -1.8512 | Down | 7.60E-16  | 2.87E-15  |

|               |                    |          |          |         |      |           |           |
|---------------|--------------------|----------|----------|---------|------|-----------|-----------|
| Unigene39924  | Potri.014G104500.6 | 5.7879   | 20.8844  | -1.8513 | Down | 1.56E-22  | 7.55E-22  |
| Unigene43758  | Potri.010G024400.1 | 8.5606   | 30.8892  | -1.8513 | Down | 1.77E-43  | 1.50E-42  |
| Unigene21321  | Potri.011G156200.1 | 20.7009  | 74.699   | -1.8514 | Down | 1.56E-290 | 1.33E-288 |
| Unigene16856  | Potri.011G149700.1 | 5.7119   | 20.6116  | -1.8514 | Down | 3.38E-29  | 2.01E-28  |
| Unigene100794 | Potri.006G027300.6 | 12.3014  | 44.39    | -1.8514 | Down | 3.06E-84  | 5.31E-83  |
| Unigene7970   | Potri.015G030300.2 | 5.9596   | 21.5069  | -1.8515 | Down | 3.94E-49  | 3.77E-48  |
| Unigene53072  | Potri.008G178200.1 | 18.122   | 65.3957  | -1.8515 | Down | 7.54E-36  | 5.35E-35  |
| Unigene53010  | Potri.013G075300.2 | 3.0449   | 10.9894  | -1.8516 | Down | 4.24E-08  | 1.08E-07  |
| Unigene12023  | Potri.011G046200.4 | 3.5244   | 12.72    | -1.8516 | Down | 1.53E-21  | 7.17E-21  |
| Unigene66797  | Potri.T177900.1    | 2.8045   | 10.1218  | -1.8517 | Down | 4.24E-08  | 1.08E-07  |
| Unigene106849 | Potri.017G148800.1 | 1.5906   | 5.7407   | -1.8517 | Down | 4.24E-08  | 1.08E-07  |
| Unigene119427 | Potri.016G098900.1 | 0.9688   | 3.4966   | -1.8517 | Down | 4.24E-08  | 1.08E-07  |
| Unigene8867   | Potri.016G041100.1 | 2.3533   | 8.4934   | -1.8517 | Down | 4.24E-08  | 1.08E-07  |
| Unigene79534  | Potri.010G212700.2 | 111.2847 | 401.6867 | -1.8518 | Down | 9.00E-242 | 5.92E-240 |
| Unigene93602  | Potri.006G203000.7 | 72.9961  | 263.4954 | -1.8519 | Down | 0         | 0         |
| Unigene34260  | Potri.010G133800.1 | 7.2381   | 26.1298  | -1.852  | Down | 5.55E-84  | 9.61E-83  |
| Unigene27351  | Potri.015G147600.4 | 6.4641   | 23.3394  | -1.8522 | Down | 3.13E-26  | 1.70E-25  |
| Unigene74860  | Potri.019G019700.1 | 25.3226  | 91.4306  | -1.8523 | Down | 7.67E-51  | 7.62E-50  |
| Unigene28671  | Potri.017G129100.5 | 3.7199   | 13.4312  | -1.8523 | Down | 3.13E-26  | 1.70E-25  |
| Unigene74380  | Potri.012G011700.2 | 44.9329  | 162.2361 | -1.8523 | Down | 1.18E-87  | 2.14E-86  |
| Unigene5866   | Potri.005G176400.4 | 7.302    | 26.3649  | -1.8523 | Down | 3.13E-26  | 1.70E-25  |
| Unigene35334  | Potri.016G020100.1 | 18.4787  | 66.7296  | -1.8525 | Down | 1.46E-37  | 1.08E-36  |
| Unigene12357  | Potri.008G141000.1 | 9.0593   | 32.7145  | -1.8525 | Down | 1.66E-55  | 1.82E-54  |
| Unigene14136  | Potri.003G170600.2 | 10.1272  | 36.5739  | -1.8526 | Down | 7.16E-49  | 6.83E-48  |
| Unigene6312   | Potri.001G298200.1 | 46.5033  | 167.9428 | -1.8526 | Down | 6.47E-161 | 2.54E-159 |
| Unigene94047  | Potri.001G317600.1 | 23.0804  | 83.3677  | -1.8528 | Down | 2.26E-150 | 8.14E-149 |
| Unigene32365  | Potri.016G090800.2 | 8.772    | 31.6875  | -1.8529 | Down | 9.00E-81  | 1.49E-79  |
| Unigene614    | Potri.013G025100.1 | 3.6028   | 13.0145  | -1.8529 | Down | 7.61E-64  | 9.70E-63  |
| Unigene44936  | Potri.009G028700.2 | 4.0751   | 14.7208  | -1.8529 | Down | 6.34E-30  | 3.84E-29  |
| Unigene15283  | Potri.002G180000.1 | 1.7      | 6.1409   | -1.8529 | Down | 4.38E-07  | 1.04E-06  |
| Unigene101748 | Potri.001G188400.1 | 1.8816   | 6.7969   | -1.8529 | Down | 4.38E-07  | 1.04E-06  |
| Unigene114205 | Potri.001G042400.1 | 2.3838   | 8.6111   | -1.8529 | Down | 4.38E-07  | 1.04E-06  |
| Unigene9270   | Potri.018G020200.5 | 12.6911  | 45.8545  | -1.8532 | Down | 6.17E-29  | 3.63E-28  |
| Unigene2311   | Potri.008G193500.2 | 6.107    | 22.0664  | -1.8533 | Down | 6.26E-45  | 5.48E-44  |
| Unigene116887 | Potri.006G233000.1 | 16.3186  | 58.9622  | -1.8533 | Down | 1.40E-50  | 1.38E-49  |
| Unigene14237  | Potri.006G054600.1 | 11.7124  | 42.3207  | -1.8533 | Down | 2.92E-23  | 1.45E-22  |
| Unigene25102  | Potri.005G156400.2 | 4.6714   | 16.8793  | -1.8533 | Down | 2.92E-23  | 1.45E-22  |
| Unigene11073  | Potri.001G127300.1 | 6.7849   | 24.516   | -1.8533 | Down | 1.55E-66  | 2.06E-65  |
| Unigene28788  | Potri.006G230200.1 | 23.4137  | 84.6053  | -1.8534 | Down | 1.20E-183 | 5.61E-182 |

|               |                     |         |          |         |      |           |           |
|---------------|---------------------|---------|----------|---------|------|-----------|-----------|
| Unigene51616  | Potri.008G079900.1  | 2.4129  | 8.7194   | -1.8535 | Down | 1.43E-17  | 5.80E-17  |
| Unigene82074  | Potri.005G090100.2  | 13.8253 | 49.96    | -1.8535 | Down | 1.29E-33  | 8.66E-33  |
| Unigene20804  | Potri.016G133700.1  | 2.394   | 8.6527   | -1.8537 | Down | 7.45E-12  | 2.35E-11  |
| Unigene28146  | Potri.006G109000.1  | 1.9902  | 7.1932   | -1.8537 | Down | 7.45E-12  | 2.35E-11  |
| Unigene4428   | Potri.005G003800.1  | 14.8242 | 53.5803  | -1.8537 | Down | 1.26E-32  | 8.21E-32  |
| Unigene45422  | Potri.004G138600.3  | 6.066   | 21.9234  | -1.8537 | Down | 1.30E-48  | 1.24E-47  |
| Unigene24511  | Potri.011G049400.1  | 6.5323  | 23.6114  | -1.8538 | Down | 3.03E-68  | 4.14E-67  |
| Unigene21110  | Potri.008G153800.6  | 48.404  | 174.9539 | -1.8538 | Down | 3.83E-171 | 1.63E-169 |
| Unigene64076  | Potri.017G022000.1  | 5.7384  | 20.7434  | -1.8539 | Down | 5.86E-27  | 3.25E-26  |
| Unigene27245  | Potri.012G021400.1  | 12.488  | 45.142   | -1.8539 | Down | 5.86E-27  | 3.25E-26  |
| Unigene43976  | Potri.004G123900.1  | 3.1083  | 11.236   | -1.8539 | Down | 5.86E-27  | 3.25E-26  |
| Unigene14290  | Potri.009G013000.2  | 15.8359 | 57.2463  | -1.854  | Down | 5.67E-42  | 4.66E-41  |
| Unigene2218   | Potri.012G016100.1  | 1.4736  | 5.3275   | -1.8541 | Down | 1.41E-16  | 5.49E-16  |
| Unigene92518  | Potri.003G117300.1  | 3.4823  | 12.5891  | -1.8541 | Down | 1.41E-16  | 5.49E-16  |
| Unigene1690   | Potri.001G230000.11 | 2.9191  | 10.553   | -1.8541 | Down | 1.41E-16  | 5.49E-16  |
| Unigene5493   | Potri.014G099300.1  | 17.0138 | 61.5116  | -1.8542 | Down | 2.58E-36  | 1.85E-35  |
| Unigene42598  | Potri.005G058200.1  | 23.4346 | 84.7258  | -1.8542 | Down | 3.21E-248 | 2.20E-246 |
| Unigene692    | Potri.001G452700.2  | 10.7698 | 38.9399  | -1.8543 | Down | 9.19E-129 | 2.69E-127 |
| Unigene81416  | Potri.013G161600.4  | 14.8317 | 53.633   | -1.8544 | Down | 2.50E-35  | 1.75E-34  |
| Unigene30616  | Potri.005G067300.1  | 10.4884 | 37.9252  | -1.8544 | Down | 5.51E-55  | 5.94E-54  |
| Unigene107313 | Potri.018G128300.3  | 2.611   | 9.4435   | -1.8547 | Down | 4.58E-06  | 9.97E-06  |
| Unigene27669  | Potri.018G089700.4  | 1.4307  | 5.1745   | -1.8547 | Down | 4.58E-06  | 9.97E-06  |
| Unigene95185  | Potri.016G129000.1  | 3.784   | 13.6863  | -1.8547 | Down | 7.48E-11  | 2.24E-10  |
| Unigene10395  | Potri.014G175200.3  | 1.1977  | 4.3319   | -1.8547 | Down | 4.58E-06  | 9.97E-06  |
| Unigene39263  | Potri.007G096100.3  | 8.9558  | 32.392   | -1.8547 | Down | 2.43E-62  | 3.01E-61  |
| Unigene5198   | Potri.005G258900.1  | 0.8491  | 3.0711   | -1.8547 | Down | 4.58E-06  | 9.97E-06  |
| Unigene51362  | Potri.003G062100.1  | 1.471   | 5.3203   | -1.8547 | Down | 4.58E-06  | 9.97E-06  |
| Unigene9225   | Potri.002G232100.5  | 4.9971  | 18.0737  | -1.8547 | Down | 7.48E-11  | 2.24E-10  |
| Unigene105066 | Potri.002G047200.1  | 1.9128  | 6.9183   | -1.8547 | Down | 4.58E-06  | 9.97E-06  |
| Unigene119523 | Potri.015G042500.1  | 1.0042  | 3.6321   | -1.8548 | Down | 7.48E-11  | 2.24E-10  |
| Unigene24562  | Potri.008G073500.2  | 2.3844  | 8.6242   | -1.8548 | Down | 4.58E-06  | 9.97E-06  |
| Unigene9172   | Potri.006G134300.1  | 1.0635  | 3.8466   | -1.8548 | Down | 4.58E-06  | 9.97E-06  |
| Unigene107046 | Potri.003G064900.1  | 1.0528  | 3.8079   | -1.8548 | Down | 4.58E-06  | 9.97E-06  |
| Unigene33646  | Potri.010G046800.1  | 7.7497  | 28.0346  | -1.855  | Down | 1.07E-42  | 8.91E-42  |
| Unigene34954  | Potri.001G024000.1  | 8.4619  | 30.6151  | -1.8552 | Down | 1.04E-68  | 1.43E-67  |
| Unigene32316  | Potri.013G035600.1  | 4.657   | 16.8503  | -1.8553 | Down | 4.84E-37  | 3.54E-36  |
| Unigene48170  | Potri.010G019600.1  | 5.4761  | 19.8143  | -1.8553 | Down | 2.70E-19  | 1.17E-18  |
| Unigene38612  | Potri.003G061800.1  | 6.2406  | 22.5799  | -1.8553 | Down | 2.18E-59  | 2.56E-58  |
| Unigene15477  | Potri.018G029100.1  | 26.3966 | 95.5171  | -1.8554 | Down | 4.58E-63  | 5.75E-62  |

|               |                    |          |          |         |      |           |           |
|---------------|--------------------|----------|----------|---------|------|-----------|-----------|
| Unigene22639  | Potri.003G185600.2 | 11.3253  | 40.981   | -1.8554 | Down | 4.58E-63  | 5.75E-62  |
| Unigene29352  | Potri.001G229700.1 | 13.8302  | 50.0434  | -1.8554 | Down | 1.00E-67  | 1.36E-66  |
| Unigene93276  | Potri.014G139000.1 | 66.3851  | 240.2408 | -1.8555 | Down | 0         | 0         |
| Unigene34803  | Potri.014G042800.1 | 12.3502  | 44.692   | -1.8555 | Down | 2.16E-84  | 3.77E-83  |
| Unigene30263  | Potri.007G011800.5 | 5.8894   | 21.3128  | -1.8555 | Down | 1.38E-14  | 4.94E-14  |
| Unigene71584  | Potri.015G006700.6 | 18.8326  | 68.1573  | -1.8556 | Down | 4.70E-36  | 3.35E-35  |
| Unigene39491  | Potri.005G126400.4 | 10.3448  | 37.4382  | -1.8556 | Down | 2.16E-96  | 4.40E-95  |
| Unigene2053   | Potri.001G424600.1 | 8.6374   | 31.2594  | -1.8556 | Down | 2.08E-83  | 3.58E-82  |
| Unigene93972  | Potri.016G127300.1 | 3.42     | 12.378   | -1.8557 | Down | 5.33E-23  | 2.62E-22  |
| Unigene93262  | Potri.014G117800.1 | 4.3168   | 15.6235  | -1.8557 | Down | 5.33E-23  | 2.62E-22  |
| Unigene20225  | Potri.010G167100.1 | 6.9395   | 25.1158  | -1.8557 | Down | 5.33E-23  | 2.62E-22  |
| Unigene44787  | Potri.001G091800.1 | 8.2411   | 29.8268  | -1.8557 | Down | 9.30E-66  | 1.22E-64  |
| Unigene28284  | Potri.018G114300.2 | 3.6083   | 13.0602  | -1.8558 | Down | 2.23E-31  | 1.41E-30  |
| Unigene39490  | Potri.010G145000.1 | 14.2859  | 51.7162  | -1.856  | Down | 1.92E-105 | 4.38E-104 |
| Unigene115484 | Potri.008G174800.2 | 3.2155   | 11.6399  | -1.856  | Down | 7.55E-10  | 2.13E-09  |
| Unigene29680  | Potri.004G207700.1 | 6.59     | 23.8555  | -1.856  | Down | 2.65E-18  | 1.11E-17  |
| Unigene48982  | Potri.002G006400.1 | 12.1827  | 44.1057  | -1.8561 | Down | 1.85E-104 | 4.16E-103 |
| Unigene43027  | Potri.013G160500.1 | 15.9623  | 57.7918  | -1.8562 | Down | 8.34E-100 | 1.79E-98  |
| Unigene83237  | Potri.002G146300.1 | 187.6112 | 679.2499 | -1.8562 | Down | 0         | 0         |
| Unigene27681  | Potri.005G033100.2 | 6.5381   | 23.6723  | -1.8563 | Down | 5.22E-22  | 2.48E-21  |
| Unigene101967 | Potri.011G163400.2 | 3.5945   | 13.0177  | -1.8566 | Down | 3.90E-45  | 3.43E-44  |
| Unigene92872  | Potri.019G099100.2 | 3.4173   | 12.3767  | -1.8567 | Down | 2.61E-17  | 1.05E-16  |
| Unigene31412  | Potri.006G108700.2 | 12.3456  | 44.7131  | -1.8567 | Down | 8.13E-49  | 7.75E-48  |
| Unigene4173   | Potri.002G068600.1 | 32.9733  | 119.4219 | -1.8567 | Down | 7.13E-96  | 1.44E-94  |
| Unigene45594  | Potri.002G127700.1 | 3.8602   | 13.9819  | -1.8568 | Down | 3.56E-56  | 3.94E-55  |
| Unigene32889  | Potri.015G144400.1 | 4.7706   | 17.2831  | -1.8571 | Down | 3.19E-66  | 4.23E-65  |
| Unigene79465  | Potri.012G062500.2 | 14.0259  | 50.8127  | -1.8571 | Down | 4.18E-32  | 2.69E-31  |
| Unigene21893  | Potri.001G449100.1 | 7.9721   | 28.8817  | -1.8571 | Down | 3.19E-66  | 4.23E-65  |
| Unigene42889  | Potri.017G128000.1 | 2.8835   | 10.4472  | -1.8572 | Down | 3.66E-43  | 3.08E-42  |
| Unigene6652   | Potri.010G194700.1 | 5.7902   | 20.9775  | -1.8572 | Down | 1.42E-73  | 2.11E-72  |
| Unigene40576  | Potri.006G165600.3 | 22.3298  | 80.908   | -1.8573 | Down | 1.46E-61  | 1.78E-60  |
| Unigene76818  | Potri.019G127000.2 | 10.7972  | 39.1277  | -1.8575 | Down | 9.95E-24  | 5.00E-23  |
| Unigene40841  | Potri.016G042100.1 | 3.4869   | 12.6361  | -1.8575 | Down | 1.37E-12  | 4.47E-12  |
| Unigene15924  | Potri.012G017700.3 | 1.2586   | 4.5609   | -1.8575 | Down | 4.89E-05  | 9.69E-05  |
| Unigene19188  | Potri.008G045300.5 | 1.0309   | 3.7358   | -1.8575 | Down | 4.89E-05  | 9.69E-05  |
| Unigene30374  | Potri.007G145200.1 | 1.6412   | 5.9474   | -1.8575 | Down | 4.89E-05  | 9.69E-05  |
| Unigene90520  | Potri.004G007600.2 | 4.2628   | 15.4478  | -1.8575 | Down | 2.58E-16  | 9.95E-16  |
| Unigene104663 | Potri.003G098200.2 | 0.8408   | 3.0468   | -1.8575 | Down | 4.89E-05  | 9.69E-05  |
| Unigene49363  | Potri.002G216200.1 | 7.5747   | 27.4496  | -1.8575 | Down | 9.95E-24  | 5.00E-23  |

|               |                    |          |          |         |      |           |           |
|---------------|--------------------|----------|----------|---------|------|-----------|-----------|
| Unigene20269  | Potri.001G247700.1 | 4.5212   | 16.3841  | -1.8575 | Down | 2.58E-16  | 9.95E-16  |
| Unigene42265  | Potri.010G179800.1 | 1.0854   | 3.9335   | -1.8576 | Down | 4.89E-05  | 9.69E-05  |
| Unigene106212 | Potri.009G060500.6 | 1.0206   | 3.6986   | -1.8576 | Down | 4.89E-05  | 9.69E-05  |
| Unigene66760  | Potri.004G028000.1 | 2.2118   | 8.0154   | -1.8576 | Down | 7.67E-09  | 2.04E-08  |
| Unigene41964  | Potri.001G145900.1 | 1.0493   | 3.8027   | -1.8576 | Down | 7.67E-09  | 2.04E-08  |
| Unigene11424  | Potri.009G011400.1 | 7.4025   | 26.8314  | -1.8578 | Down | 5.21E-88  | 9.52E-87  |
| Unigene92001  | Potri.006G219800.2 | 33.9011  | 122.8774 | -1.8578 | Down | 2.02E-138 | 6.50E-137 |
| Unigene43295  | Potri.005G247000.1 | 4.3933   | 15.9236  | -1.8578 | Down | 3.09E-52  | 3.16E-51  |
| Unigene25725  | Potri.017G050500.1 | 33.5696  | 121.6858 | -1.8579 | Down | 4.81E-98  | 1.00E-96  |
| Unigene46091  | Potri.005G070700.5 | 12.1678  | 44.1057  | -1.8579 | Down | 1.66E-37  | 1.23E-36  |
| Unigene20533  | Potri.004G233900.5 | 10.6829  | 38.7222  | -1.8579 | Down | 3.43E-41  | 2.76E-40  |
| Unigene82342  | Potri.003G199200.2 | 42.4641  | 153.9402 | -1.8581 | Down | 9.84E-101 | 2.13E-99  |
| Unigene31777  | Potri.016G060400.1 | 4.7597   | 17.2562  | -1.8582 | Down | 1.82E-124 | 5.13E-123 |
| Unigene89679  | Potri.006G203000.7 | 125.0207 | 453.2802 | -1.8582 | Down | 0         | 0         |
| Unigene6336   | Potri.008G004200.1 | 9.1489   | 33.1717  | -1.8583 | Down | 4.93E-19  | 2.12E-18  |
| Unigene83164  | Potri.001G034400.1 | 14.5287  | 52.6772  | -1.8583 | Down | 1.61E-36  | 1.16E-35  |
| Unigene5914   | Potri.001G082000.2 | 7.6915   | 27.8891  | -1.8584 | Down | 7.83E-33  | 5.14E-32  |
| Unigene30161  | Potri.T172000.4    | 4.2362   | 15.3617  | -1.8585 | Down | 2.55E-15  | 9.43E-15  |
| Unigene34736  | Potri.015G132100.3 | 3.5127   | 12.7383  | -1.8585 | Down | 1.09E-66  | 1.46E-65  |
| Unigene107150 | Potri.010G239700.1 | 0.9257   | 3.3569   | -1.8585 | Down | 2.55E-15  | 9.43E-15  |
| Unigene38930  | Potri.005G081500.3 | 8.64     | 31.3308  | -1.8585 | Down | 4.46E-84  | 7.73E-83  |
| Unigene32574  | Potri.012G004900.3 | 2.1461   | 7.783    | -1.8586 | Down | 1.90E-25  | 1.01E-24  |
| Unigene24085  | Potri.002G171900.1 | 4.1692   | 15.1196  | -1.8586 | Down | 3.21E-39  | 2.48E-38  |
| Unigene46735  | Potri.001G346200.1 | 55.5383  | 201.4242 | -1.8587 | Down | 0         | 0         |
| Unigene18414  | Potri.018G112000.1 | 4.3916   | 15.929   | -1.8588 | Down | 5.62E-52  | 5.72E-51  |
| Unigene41731  | Potri.002G105800.1 | 9.7586   | 35.3957  | -1.8588 | Down | 7.61E-32  | 4.87E-31  |
| Unigene39033  | Potri.002G077100.1 | 3.0325   | 10.9992  | -1.8588 | Down | 1.37E-11  | 4.26E-11  |
| Unigene42533  | Potri.010G181400.3 | 2.5237   | 9.1545   | -1.8589 | Down | 3.11E-38  | 2.34E-37  |
| Unigene33766  | Potri.008G088800.1 | 9.0641   | 32.8788  | -1.8589 | Down | 2.69E-48  | 2.54E-47  |
| Unigene35315  | Potri.010G129500.1 | 5.3673   | 19.4704  | -1.859  | Down | 3.74E-28  | 2.16E-27  |
| Unigene19070  | Potri.010G049100.9 | 3.542    | 12.8499  | -1.8591 | Down | 4.85E-18  | 2.01E-17  |
| Unigene22911  | Potri.001G251900.4 | 8.7925   | 31.8965  | -1.8591 | Down | 1.29E-44  | 1.12E-43  |
| Unigene63377  | Potri.017G129500.1 | 5.7776   | 20.9622  | -1.8592 | Down | 1.86E-24  | 9.57E-24  |
| Unigene10751  | Potri.008G111100.1 | 9.097    | 33.0086  | -1.8594 | Down | 1.52E-185 | 7.23E-184 |
| Unigene116153 | Potri.008G182000.1 | 2.2935   | 8.3231   | -1.8596 | Down | 7.86E-08  | 1.96E-07  |
| Unigene55115  | Potri.005G126400.1 | 7.7032   | 27.9549  | -1.8596 | Down | 3.65E-27  | 2.04E-26  |
| Unigene6977   | Potri.002G076800.1 | 2.8445   | 10.3228  | -1.8596 | Down | 2.52E-46  | 2.27E-45  |
| Unigene36088  | Potri.002G073400.3 | 3.0679   | 11.1336  | -1.8596 | Down | 7.86E-08  | 1.96E-07  |
| Unigene21375  | Potri.006G256000.2 | 8.4467   | 30.655   | -1.8597 | Down | 6.25E-179 | 2.82E-177 |

|               |                    |         |          |         |      |           |           |
|---------------|--------------------|---------|----------|---------|------|-----------|-----------|
| Unigene82459  | Potri.002G047100.2 | 34.8701 | 126.5603 | -1.8598 | Down | 1.47E-83  | 2.54E-82  |
| Unigene11306  | Potri.014G064800.1 | 8.9929  | 32.6424  | -1.8599 | Down | 1.02E-51  | 1.04E-50  |
| Unigene83648  | Potri.010G076700.1 | 20.5079 | 74.439   | -1.8599 | Down | 1.02E-51  | 1.04E-50  |
| Unigene6010   | Potri.005G123400.1 | 35.3956 | 128.4808 | -1.8599 | Down | 7.85E-139 | 2.54E-137 |
| Unigene80397  | Potri.001G216600.1 | 35.0435 | 127.1991 | -1.8599 | Down | 6.95E-80  | 1.14E-78  |
| Unigene4280   | Potri.017G075600.1 | 16.3019 | 59.1801  | -1.8601 | Down | 1.78E-63  | 2.25E-62  |
| Unigene111153 | Potri.010G031900.1 | 7.4599  | 27.0813  | -1.8601 | Down | 4.78E-17  | 1.90E-16  |
| Unigene25949  | Potri.017G124300.2 | 16.6497 | 60.4525  | -1.8603 | Down | 2.00E-53  | 2.09E-52  |
| Unigene13904  | Potri.012G082100.1 | 4.834   | 17.5529  | -1.8604 | Down | 7.01E-29  | 4.12E-28  |
| Unigene11193  | Potri.007G047900.2 | 1.8824  | 6.8352   | -1.8604 | Down | 1.38E-10  | 4.06E-10  |
| Unigene1983   | Potri.006G135300.1 | 2.5304  | 9.1881   | -1.8604 | Down | 9.17E-20  | 4.05E-19  |
| Unigene48984  | Potri.004G015200.1 | 2.5823  | 9.3765   | -1.8604 | Down | 1.38E-10  | 4.06E-10  |
| Unigene40818  | Potri.002G142000.1 | 3.7578  | 13.645   | -1.8604 | Down | 1.38E-10  | 4.06E-10  |
| Unigene92331  | Potri.001G233000.2 | 24.8929 | 90.3953  | -1.8605 | Down | 8.84E-107 | 2.05E-105 |
| Unigene35304  | Potri.001G134000.2 | 54.1561 | 196.6757 | -1.8606 | Down | 1.03E-153 | 3.81E-152 |
| Unigene6871   | Potri.013G054300.2 | 2.7029  | 9.8175   | -1.8608 | Down | 2.52E-13  | 8.53E-13  |
| Unigene39955  | Potri.017G139400.2 | 2.422   | 8.7975   | -1.8609 | Down | 2.52E-13  | 8.53E-13  |
| Unigene98567  | Potri.013G047300.3 | 2.9942  | 10.8758  | -1.8609 | Down | 2.52E-13  | 8.53E-13  |
| Unigene43549  | Potri.006G080700.1 | 8.4992  | 30.8714  | -1.8609 | Down | 1.60E-60  | 1.92E-59  |
| Unigene73929  | Potri.014G111900.1 | 19.788  | 71.8806  | -1.861  | Down | 1.10E-39  | 8.56E-39  |
| Unigene53460  | Potri.001G163900.1 | 3.6956  | 13.4259  | -1.8611 | Down | 4.73E-16  | 1.80E-15  |
| Unigene20182  | Potri.012G011700.2 | 11.7932 | 42.8445  | -1.8612 | Down | 1.35E-30  | 8.33E-30  |
| Unigene21267  | Potri.003G129800.1 | 6.8154  | 24.7624  | -1.8613 | Down | 3.07E-162 | 1.22E-160 |
| Unigene698    | Potri.003G097300.2 | 9.4641  | 34.3873  | -1.8613 | Down | 9.02E-19  | 3.83E-18  |
| Unigene13313  | Potri.009G071800.1 | 5.5138  | 20.0344  | -1.8614 | Down | 3.63E-53  | 3.78E-52  |
| Unigene86187  | Potri.019G042800.1 | 7.3848  | 26.8351  | -1.8615 | Down | 1.74E-21  | 8.14E-21  |
| Unigene31811  | Potri.009G064700.4 | 10.2231 | 37.1483  | -1.8615 | Down | 1.09E-174 | 4.75E-173 |
| Unigene80786  | Potri.005G021400.1 | 19.9926 | 72.6549  | -1.8616 | Down | 8.62E-47  | 7.87E-46  |
| Unigene81296  | Potri.003G031000.2 | 19.7555 | 71.7933  | -1.8616 | Down | 8.62E-47  | 7.87E-46  |
| Unigene18710  | Potri.007G041000.1 | 24.1694 | 87.8488  | -1.8618 | Down | 6.37E-196 | 3.24E-194 |
| Unigene50747  | Potri.006G083900.3 | 7.3788  | 26.8193  | -1.8618 | Down | 2.60E-32  | 1.68E-31  |
| Unigene45655  | Potri.014G121500.1 | 4.5145  | 16.4094  | -1.8619 | Down | 4.94E-71  | 7.05E-70  |
| Unigene29633  | Potri.010G169400.1 | 53.102  | 193.027  | -1.862  | Down | 2.52E-252 | 1.76E-250 |
| Unigene22083  | Potri.012G077500.2 | 21.1285 | 76.8097  | -1.8621 | Down | 3.12E-182 | 1.45E-180 |
| Unigene68254  | Potri.010G217600.1 | 0.9736  | 3.54     | -1.8623 | Down | 8.14E-07  | 1.89E-06  |
| Unigene100489 | Potri.018G051800.2 | 0.9657  | 3.5113   | -1.8624 | Down | 5.39E-04  | 9.53E-04  |
| Unigene115738 | Potri.016G076400.1 | 2.0094  | 7.3064   | -1.8624 | Down | 8.14E-07  | 1.89E-06  |
| Unigene62272  | Potri.014G051500.3 | 9.6882  | 35.2273  | -1.8624 | Down | 1.28E-28  | 7.45E-28  |
| Unigene48934  | Potri.014G039600.1 | 1.5788  | 5.7407   | -1.8624 | Down | 8.14E-07  | 1.89E-06  |

|               |                    |         |          |         |      |           |           |
|---------------|--------------------|---------|----------|---------|------|-----------|-----------|
| Unigene23914  | Potri.012G000900.1 | 2.2903  | 8.3279   | -1.8624 | Down | 1.71E-20  | 7.73E-20  |
| Unigene109690 | Potri.009G170300.1 | 1.3751  | 5        | -1.8624 | Down | 5.39E-04  | 9.53E-04  |
| Unigene10037  | Potri.009G020400.2 | 1.3441  | 4.8874   | -1.8624 | Down | 8.14E-07  | 1.89E-06  |
| Unigene24671  | Potri.008G046500.2 | 1.4846  | 5.398    | -1.8624 | Down | 5.39E-04  | 9.53E-04  |
| Unigene115661 | Potri.007G132300.1 | 1.0115  | 3.678    | -1.8624 | Down | 5.39E-04  | 9.53E-04  |
| Unigene25750  | Potri.007G113100.2 | 1.0361  | 3.7674   | -1.8624 | Down | 5.39E-04  | 9.53E-04  |
| Unigene54476  | Potri.007G023500.1 | 1.4556  | 5.2927   | -1.8624 | Down | 5.39E-04  | 9.53E-04  |
| Unigene46375  | Potri.006G244300.2 | 3.9091  | 14.214   | -1.8624 | Down | 8.88E-18  | 3.64E-17  |
| Unigene112196 | Potri.006G059300.2 | 1.2433  | 4.5208   | -1.8624 | Down | 5.39E-04  | 9.53E-04  |
| Unigene57413  | Potri.005G235400.1 | 1.7553  | 6.3824   | -1.8624 | Down | 8.14E-07  | 1.89E-06  |
| Unigene101860 | Potri.003G148200.1 | 1.7425  | 6.3358   | -1.8624 | Down | 2.51E-12  | 8.11E-12  |
| Unigene14680  | Potri.003G067800.2 | 21.0138 | 76.4085  | -1.8624 | Down | 1.61E-82  | 2.72E-81  |
| Unigene19383  | Potri.003G017100.1 | 1.9006  | 6.9108   | -1.8624 | Down | 1.39E-09  | 3.88E-09  |
| Unigene39046  | Potri.001G403400.1 | 2.6583  | 9.6659   | -1.8624 | Down | 2.51E-12  | 8.11E-12  |
| Unigene12709  | Potri.001G352000.2 | 18.0644 | 65.6839  | -1.8624 | Down | 1.90E-74  | 2.86E-73  |
| Unigene42136  | Potri.001G010400.2 | 1.5276  | 5.5546   | -1.8624 | Down | 1.39E-09  | 3.88E-09  |
| Unigene114651 | Potri.008G079900.2 | 1.089   | 3.9599   | -1.8625 | Down | 5.39E-04  | 9.53E-04  |
| Unigene116740 | Potri.003G059900.1 | 0.9042  | 3.2879   | -1.8625 | Down | 5.39E-04  | 9.53E-04  |
| Unigene21738  | Potri.002G257800.5 | 8.0302  | 29.2031  | -1.8626 | Down | 3.15E-84  | 5.48E-83  |
| Unigene43565  | Potri.014G117400.1 | 11.2766 | 41.0119  | -1.8627 | Down | 1.63E-115 | 4.18E-114 |
| Unigene83910  | Potri.018G076200.2 | 15.9272 | 57.9312  | -1.8628 | Down | 3.89E-41  | 3.13E-40  |
| Unigene25461  | Potri.001G396500.4 | 25.4315 | 92.499   | -1.8628 | Down | 5.67E-128 | 1.65E-126 |
| Unigene17174  | Potri.T153200.1    | 16.4647 | 59.8946  | -1.863  | Down | 2.52E-56  | 2.79E-55  |
| Unigene6646   | Potri.T007500.1    | 4.2473  | 15.4504  | -1.863  | Down | 4.41E-176 | 1.95E-174 |
| Unigene8387   | Potri.004G163300.1 | 22.7681 | 82.8234  | -1.863  | Down | 3.08E-116 | 7.96E-115 |
| Unigene33848  | Potri.017G069600.1 | 13.1223 | 47.7381  | -1.8631 | Down | 6.16E-51  | 6.13E-50  |
| Unigene33942  | Potri.015G048300.1 | 7.1982  | 26.1858  | -1.8631 | Down | 1.25E-27  | 7.06E-27  |
| Unigene9286   | Potri.002G044400.1 | 10.249  | 37.289   | -1.8633 | Down | 3.25E-22  | 1.55E-21  |
| Unigene42410  | Potri.006G225100.2 | 6.5121  | 23.6969  | -1.8635 | Down | 5.91E-149 | 2.10E-147 |
| Unigene38565  | Potri.008G140400.1 | 3.3704  | 12.2654  | -1.8636 | Down | 8.76E-17  | 3.45E-16  |
| Unigene49545  | Potri.004G157700.6 | 9.4829  | 34.5093  | -1.8636 | Down | 4.74E-32  | 3.05E-31  |
| Unigene42975  | Potri.015G023700.2 | 2.8935  | 10.5309  | -1.8637 | Down | 7.30E-42  | 5.99E-41  |
| Unigene28010  | Potri.007G060100.1 | 12.96   | 47.1665  | -1.8637 | Down | 4.74E-57  | 5.34E-56  |
| Unigene31372  | Potri.014G059000.3 | 5.308   | 19.3198  | -1.8638 | Down | 4.64E-14  | 1.62E-13  |
| Unigene65482  | Potri.003G091800.1 | 4.286   | 15.5998  | -1.8638 | Down | 4.64E-14  | 1.62E-13  |
| Unigene53423  | Potri.001G266400.1 | 18.0146 | 65.5653  | -1.8638 | Down | 2.34E-54  | 2.50E-53  |
| Unigene17161  | Potri.018G123700.2 | 3.0805  | 11.2124  | -1.8639 | Down | 4.64E-14  | 1.62E-13  |
| Unigene2173   | Potri.009G057500.2 | 9.0193  | 32.8293  | -1.8639 | Down | 6.27E-74  | 9.36E-73  |
| Unigene16597  | Potri.002G036800.4 | 33.4074 | 121.6039 | -1.8639 | Down | 3.08E-71  | 4.41E-70  |

|               |                    |         |          |         |      |           |           |
|---------------|--------------------|---------|----------|---------|------|-----------|-----------|
| Unigene19546  | Potri.017G151800.1 | 4.6029  | 16.7581  | -1.8642 | Down | 2.52E-11  | 7.73E-11  |
| Unigene25121  | Potri.015G004600.1 | 6.9562  | 25.3257  | -1.8642 | Down | 3.18E-21  | 1.47E-20  |
| Unigene8785   | Potri.005G020100.2 | 2.063   | 7.5108   | -1.8642 | Down | 4.61E-31  | 2.88E-30  |
| Unigene39040  | Potri.003G128500.4 | 3.047   | 11.0934  | -1.8642 | Down | 2.52E-11  | 7.73E-11  |
| Unigene46918  | Potri.003G051500.1 | 3.4559  | 12.5819  | -1.8642 | Down | 2.52E-11  | 7.73E-11  |
| Unigene10615  | Potri.017G001300.1 | 10.5123 | 38.2749  | -1.8643 | Down | 8.94E-58  | 1.02E-56  |
| Unigene39425  | Potri.006G123700.1 | 8.0308  | 29.2398  | -1.8643 | Down | 8.94E-58  | 1.02E-56  |
| Unigene19630  | Potri.008G120400.2 | 28.2572 | 102.8985 | -1.8645 | Down | 3.86E-86  | 6.88E-85  |
| Unigene49345  | Potri.001G369900.1 | 4.6624  | 16.9782  | -1.8645 | Down | 1.65E-18  | 6.94E-18  |
| Unigene84382  | Potri.005G129500.3 | 16.2347 | 59.1214  | -1.8646 | Down | 1.37E-42  | 1.14E-41  |
| Unigene3309   | Potri.009G164400.1 | 2.9536  | 10.7574  | -1.8648 | Down | 6.85E-40  | 5.36E-39  |
| Unigene43870  | Potri.001G117000.1 | 8.0356  | 29.2667  | -1.8648 | Down | 5.37E-47  | 4.93E-46  |
| Unigene18242  | Potri.017G130400.1 | 2.3072  | 8.404    | -1.8649 | Down | 8.66E-16  | 3.26E-15  |
| Unigene3163   | Potri.014G165500.4 | 1.5006  | 5.4658   | -1.8649 | Down | 1.42E-08  | 3.71E-08  |
| Unigene1487   | Potri.007G003900.2 | 1.094   | 3.9848   | -1.8649 | Down | 1.42E-08  | 3.71E-08  |
| Unigene81414  | Potri.001G436300.1 | 3.0838  | 11.2329  | -1.8649 | Down | 1.42E-08  | 3.71E-08  |
| Unigene103853 | Potri.018G146700.3 | 0.9494  | 3.4584   | -1.865  | Down | 1.42E-08  | 3.72E-08  |
| Unigene37804  | Potri.003G220100.1 | 10.8811 | 39.64    | -1.8651 | Down | 2.15E-74  | 3.23E-73  |
| Unigene46950  | Potri.002G124000.1 | 62.5173 | 227.7453 | -1.8651 | Down | 7.18E-262 | 5.28E-260 |
| Unigene20690  | Potri.003G108000.4 | 9.2338  | 33.6404  | -1.8652 | Down | 2.27E-27  | 1.28E-26  |
| Unigene43386  | Potri.018G017100.2 | 9.8129  | 35.7518  | -1.8653 | Down | 2.12E-127 | 6.12E-126 |
| Unigene39127  | Potri.003G137400.3 | 15.6334 | 56.9582  | -1.8653 | Down | 3.44E-83  | 5.88E-82  |
| Unigene33962  | Potri.017G060200.1 | 30.443  | 110.923  | -1.8654 | Down | 3.79E-189 | 1.85E-187 |
| Unigene83207  | Potri.008G121700.2 | 12.4332 | 45.3024  | -1.8654 | Down | 8.64E-32  | 5.51E-31  |
| Unigene4353   | Potri.013G123500.1 | 4.5292  | 16.5046  | -1.8655 | Down | 4.62E-13  | 1.55E-12  |
| Unigene68626  | Potri.010G251300.1 | 3.5824  | 13.0545  | -1.8655 | Down | 4.62E-13  | 1.55E-12  |
| Unigene52207  | Potri.006G108300.2 | 4.2273  | 15.4043  | -1.8655 | Down | 4.62E-13  | 1.55E-12  |
| Unigene52587  | Potri.005G054100.1 | 4.2772  | 15.5862  | -1.8655 | Down | 1.16E-24  | 5.99E-24  |
| Unigene33986  | Potri.017G077300.2 | 5.799   | 21.1339  | -1.8657 | Down | 4.36E-29  | 2.58E-28  |
| Unigene7565   | Potri.007G004900.1 | 5.1295  | 18.694   | -1.8657 | Down | 4.36E-29  | 2.58E-28  |
| Unigene1088   | Potri.005G177200.1 | 12.6367 | 46.0561  | -1.8658 | Down | 1.04E-92  | 2.02E-91  |
| Unigene34744  | Potri.001G314400.1 | 2.7773  | 10.1232  | -1.8659 | Down | 6.43E-38  | 4.80E-37  |
| Unigene7654   | Potri.006G009500.1 | 3.7424  | 13.6415  | -1.866  | Down | 5.93E-22  | 2.81E-21  |
| Unigene86391  | Potri.002G191300.1 | 31.3514 | 114.2809 | -1.866  | Down | 2.50E-87  | 4.53E-86  |
| Unigene28357  | Potri.015G117600.1 | 16.5415 | 60.3028  | -1.8661 | Down | 1.73E-122 | 4.77E-121 |
| Unigene23336  | Potri.006G027200.1 | 6.1217  | 22.3166  | -1.8661 | Down | 8.40E-31  | 5.21E-30  |
| Unigene7221   | Potri.007G146500.2 | 12.0045 | 43.7649  | -1.8662 | Down | 1.25E-39  | 9.69E-39  |
| Unigene32769  | Potri.007G119300.1 | 5.9425  | 21.6646  | -1.8662 | Down | 1.50E-77  | 2.38E-76  |
| Unigene17351  | Potri.010G020900.1 | 10.7487 | 39.1914  | -1.8664 | Down | 1.90E-92  | 3.66E-91  |



|               |                    |         |          |         |      |           |           |
|---------------|--------------------|---------|----------|---------|------|-----------|-----------|
| Unigene51111  | Potri.018G093400.6 | 1.7074  | 6.2259   | -1.8665 | Down | 8.56E-06  | 1.82E-05  |
| Unigene100527 | Potri.018G004600.1 | 3.4309  | 12.5105  | -1.8665 | Down | 8.57E-15  | 3.10E-14  |
| Unigene25575  | Potri.015G099500.6 | 1.1224  | 4.0929   | -1.8665 | Down | 8.56E-06  | 1.82E-05  |
| Unigene17204  | Potri.014G146900.5 | 2.3368  | 8.5212   | -1.8665 | Down | 2.54E-10  | 7.37E-10  |
| Unigene111198 | Potri.011G106100.2 | 2.1082  | 7.6876   | -1.8665 | Down | 8.56E-06  | 1.82E-05  |
| Unigene117642 | Potri.011G010900.1 | 1.2965  | 4.7277   | -1.8665 | Down | 8.56E-06  | 1.82E-05  |
| Unigene40430  | Potri.010G084000.1 | 1.7926  | 6.5366   | -1.8665 | Down | 2.54E-10  | 7.37E-10  |
| Unigene20357  | Potri.010G027900.1 | 2.0811  | 7.5886   | -1.8665 | Down | 2.54E-10  | 7.37E-10  |
| Unigene72116  | Potri.009G120200.2 | 2.3539  | 8.5832   | -1.8665 | Down | 8.56E-06  | 1.82E-05  |
| Unigene9459   | Potri.003G148400.1 | 1.4694  | 5.358    | -1.8665 | Down | 8.56E-06  | 1.82E-05  |
| Unigene8896   | Potri.003G059500.2 | 10.8854 | 39.6931  | -1.8665 | Down | 3.71E-50  | 3.63E-49  |
| Unigene40260  | Potri.001G452300.3 | 4.1741  | 15.2208  | -1.8665 | Down | 4.25E-28  | 2.44E-27  |
| Unigene32590  | Potri.005G102000.1 | 9.7964  | 35.7269  | -1.8667 | Down | 1.53E-119 | 4.10E-118 |
| Unigene43958  | Potri.015G147200.1 | 27.9309 | 101.878  | -1.8669 | Down | 9.02E-110 | 2.17E-108 |
| Unigene4610   | Potri.004G236300.2 | 18.5175 | 67.5453  | -1.867  | Down | 3.58E-49  | 3.44E-48  |
| Unigene25791  | Potri.007G052200.3 | 14.8158 | 54.047   | -1.8671 | Down | 2.34E-40  | 1.85E-39  |
| Unigene42486  | Potri.001G412000.1 | 6.5306  | 23.8231  | -1.8671 | Down | 2.11E-175 | 9.24E-174 |
| Unigene28104  | Potri.018G121200.1 | 9.2897  | 33.8921  | -1.8672 | Down | 1.78E-46  | 1.61E-45  |
| Unigene39719  | Potri.007G077100.2 | 4.3823  | 15.9882  | -1.8672 | Down | 1.57E-31  | 9.98E-31  |
| Unigene88489  | Potri.002G036800.4 | 19.6549 | 71.7077  | -1.8672 | Down | 2.13E-61  | 2.59E-60  |
| Unigene97391  | Potri.007G098500.1 | 2.3246  | 8.481    | -1.8673 | Down | 1.60E-16  | 6.24E-16  |
| Unigene48513  | Potri.001G232800.1 | 3.5253  | 12.8642  | -1.8675 | Down | 4.62E-12  | 1.47E-11  |
| Unigene38668  | Potri.010G177200.4 | 13.6435 | 49.787   | -1.8676 | Down | 8.84E-44  | 7.55E-43  |
| Unigene19215  | Potri.002G191300.1 | 23.7919 | 86.8199  | -1.8676 | Down | 2.65E-54  | 2.82E-53  |
| Unigene6705   | Potri.004G159700.1 | 2.1277  | 7.7657   | -1.8678 | Down | 3.02E-18  | 1.26E-17  |
| Unigene1750   | Potri.007G137200.1 | 8.8482  | 32.2961  | -1.8679 | Down | 4.40E-41  | 3.55E-40  |
| Unigene51548  | Potri.002G151500.2 | 11.7451 | 42.8693  | -1.8679 | Down | 1.01E-57  | 1.15E-56  |
| Unigene33096  | Potri.002G151600.1 | 5.7436  | 20.9662  | -1.868  | Down | 1.53E-30  | 9.43E-30  |
| Unigene38310  | Potri.017G100800.1 | 8.8726  | 32.3895  | -1.8681 | Down | 1.14E-36  | 8.22E-36  |
| Unigene12972  | Potri.009G086300.1 | 8.3701  | 30.5548  | -1.8681 | Down | 1.14E-36  | 8.22E-36  |
| Unigene464    | Potri.011G024000.2 | 13.0318 | 47.5773  | -1.8682 | Down | 1.23E-193 | 6.14E-192 |
| Unigene85990  | Potri.007G090400.1 | 31.125  | 113.6318 | -1.8682 | Down | 1.44E-85  | 2.55E-84  |
| Unigene42060  | Potri.018G023000.1 | 6.1975  | 22.6274  | -1.8683 | Down | 5.70E-20  | 2.53E-19  |
| Unigene8980   | Potri.014G087000.1 | 3.6096  | 13.179   | -1.8683 | Down | 8.52E-14  | 2.94E-13  |
| Unigene109604 | Potri.014G031000.1 | 6.2166  | 22.6972  | -1.8683 | Down | 8.52E-14  | 2.94E-13  |
| Unigene22511  | Potri.011G049400.1 | 2.5193  | 9.1981   | -1.8683 | Down | 8.52E-14  | 2.94E-13  |
| Unigene111242 | Potri.009G033400.1 | 5.8129  | 21.2234  | -1.8683 | Down | 8.52E-14  | 2.94E-13  |
| Unigene51440  | Potri.007G131600.1 | 1.2252  | 4.4732   | -1.8683 | Down | 1.46E-07  | 3.57E-07  |
| Unigene10474  | Potri.003G102600.1 | 1.547   | 5.6482   | -1.8683 | Down | 1.46E-07  | 3.57E-07  |

|               |                    |         |          |         |      |           |           |
|---------------|--------------------|---------|----------|---------|------|-----------|-----------|
| Unigene48285  | Potri.002G089300.1 | 3.1373  | 11.4547  | -1.8683 | Down | 1.46E-07  | 3.57E-07  |
| Unigene43460  | Potri.008G124100.1 | 21.335  | 77.8983  | -1.8684 | Down | 5.56E-150 | 2.00E-148 |
| Unigene22715  | Potri.019G112100.1 | 4.2744  | 15.6087  | -1.8686 | Down | 5.69E-34  | 3.85E-33  |
| Unigene20317  | Potri.007G079800.2 | 23.2466 | 84.8983  | -1.8687 | Down | 7.28E-62  | 8.94E-61  |
| Unigene41767  | Potri.005G152800.1 | 8.3995  | 30.6757  | -1.8687 | Down | 8.27E-42  | 6.77E-41  |
| Unigene12259  | Potri.018G051800.1 | 17.5414 | 64.0679  | -1.8688 | Down | 1.42E-63  | 1.80E-62  |
| Unigene50095  | Potri.018G008700.1 | 4.6518  | 16.9909  | -1.8689 | Down | 1.84E-57  | 2.09E-56  |
| Unigene78952  | Potri.012G108200.1 | 6.3987  | 23.3713  | -1.8689 | Down | 1.59E-15  | 5.90E-15  |
| Unigene11178  | Potri.008G155000.1 | 1.2628  | 4.6125   | -1.8689 | Down | 1.59E-15  | 5.90E-15  |
| Unigene19099  | Potri.006G279100.2 | 5.5409  | 20.2382  | -1.8689 | Down | 1.59E-15  | 5.90E-15  |
| Unigene37430  | Potri.008G172200.4 | 14.4248 | 52.6914  | -1.869  | Down | 3.59E-59  | 4.21E-58  |
| Unigene6935   | Potri.001G344000.1 | 9.1936  | 33.582   | -1.869  | Down | 2.13E-37  | 1.57E-36  |
| Unigene29936  | Potri.012G036300.1 | 8.3421  | 30.4746  | -1.8691 | Down | 2.87E-31  | 1.80E-30  |
| Unigene1215   | Potri.005G099700.2 | 9.8137  | 35.8487  | -1.8691 | Down | 1.01E-88  | 1.86E-87  |
| Unigene98246  | Potri.013G117900.1 | 3.1892  | 11.6522  | -1.8693 | Down | 2.57E-09  | 7.05E-09  |
| Unigene119285 | Potri.011G103300.1 | 1.2979  | 4.742    | -1.8693 | Down | 2.57E-09  | 7.05E-09  |
| Unigene52715  | Potri.010G023800.1 | 25.9967 | 94.9832  | -1.8693 | Down | 1.77E-56  | 1.98E-55  |
| Unigene44561  | Potri.004G225700.5 | 7.2092  | 26.3399  | -1.8693 | Down | 3.94E-25  | 2.07E-24  |
| Unigene6745   | Potri.017G073900.2 | 4.1916  | 15.3149  | -1.8694 | Down | 3.94E-25  | 2.07E-24  |
| Unigene45720  | Potri.003G219000.1 | 34.4554 | 125.8961 | -1.8694 | Down | 8.56E-146 | 2.95E-144 |
| Unigene80540  | Potri.002G138300.1 | 53.9271 | 197.0528 | -1.8695 | Down | 4.35E-124 | 1.22E-122 |
| Unigene80006  | Potri.006G023900.2 | 7.7644  | 28.3757  | -1.8697 | Down | 5.60E-19  | 2.40E-18  |
| Unigene49060  | Potri.005G215100.1 | 3.1391  | 11.472   | -1.8697 | Down | 5.60E-19  | 2.40E-18  |
| Unigene59719  | Potri.001G266700.1 | 5.2498  | 19.1864  | -1.8697 | Down | 2.59E-63  | 3.26E-62  |
| Unigene14760  | Potri.013G035000.1 | 7.0663  | 25.8265  | -1.8698 | Down | 1.45E-28  | 8.44E-28  |
| Unigene7489   | Potri.005G134500.4 | 5.7794  | 21.1224  | -1.8698 | Down | 5.88E-46  | 5.27E-45  |
| Unigene70922  | Potri.017G090100.4 | 35.4439 | 129.5523 | -1.8699 | Down | 9.91E-67  | 1.32E-65  |
| Unigene26020  | Potri.005G257400.4 | 4.7689  | 17.4319  | -1.87   | Down | 4.63E-11  | 1.40E-10  |
| Unigene17689  | Potri.010G191800.1 | 17.4297 | 63.7205  | -1.8702 | Down | 8.47E-53  | 8.75E-52  |
| Unigene35464  | Potri.006G166000.4 | 6.595   | 24.1111  | -1.8703 | Down | 2.02E-22  | 9.71E-22  |
| Unigene24418  | Potri.012G035900.4 | 2.0722  | 7.577    | -1.8705 | Down | 8.49E-13  | 2.80E-12  |
| Unigene50226  | Potri.004G091800.3 | 7.7986  | 28.5158  | -1.8705 | Down | 3.66E-69  | 5.08E-68  |
| Unigene111841 | Potri.004G035200.1 | 25.968  | 94.9524  | -1.8705 | Down | 6.30E-58  | 7.21E-57  |
| Unigene52140  | Potri.001G003900.1 | 3.8829  | 14.1979  | -1.8705 | Down | 8.49E-13  | 2.80E-12  |
| Unigene42718  | Potri.018G075500.1 | 27.7738 | 101.5635 | -1.8706 | Down | 0         | 0         |
| Unigene75558  | Potri.018G050800.1 | 23.1223 | 84.5526  | -1.8706 | Down | 2.15E-48  | 2.04E-47  |
| Unigene26534  | Potri.008G073100.1 | 11.2215 | 41.0366  | -1.8706 | Down | 7.36E-26  | 3.96E-25  |
| Unigene24204  | Potri.006G106800.1 | 4.1518  | 15.1867  | -1.871  | Down | 5.50E-44  | 4.71E-43  |
| Unigene38128  | Potri.008G154100.1 | 16.5442 | 60.5209  | -1.8711 | Down | 1.02E-76  | 1.59E-75  |

|               |                    |         |          |         |      |           |           |
|---------------|--------------------|---------|----------|---------|------|-----------|-----------|
| Unigene29141  | Potri.005G158300.2 | 11.9819 | 43.8318  | -1.8711 | Down | 4.53E-62  | 5.60E-61  |
| Unigene19656  | Potri.003G045700.2 | 23.5001 | 85.964   | -1.8711 | Down | 2.32E-60  | 2.78E-59  |
| Unigene18396  | Potri.011G141400.1 | 5.1743  | 18.9296  | -1.8712 | Down | 4.05E-49  | 3.88E-48  |
| Unigene56393  | Potri.T034200.1    | 8.4452  | 30.8971  | -1.8713 | Down | 5.51E-18  | 2.28E-17  |
| Unigene93515  | Potri.013G008300.3 | 28.5269 | 104.3727 | -1.8713 | Down | 1.03E-155 | 3.88E-154 |
| Unigene32200  | Potri.008G139700.2 | 5.3183  | 19.4581  | -1.8713 | Down | 1.54E-52  | 1.58E-51  |
| Unigene18371  | Potri.001G120900.1 | 5.8871  | 21.5406  | -1.8714 | Down | 4.40E-92  | 8.47E-91  |
| Unigene92507  | Potri.017G090300.4 | 17.9533 | 65.697   | -1.8716 | Down | 7.39E-81  | 1.23E-79  |
| Unigene28095  | Potri.004G091100.2 | 10.2046 | 37.3419  | -1.8716 | Down | 2.74E-41  | 2.22E-40  |
| Unigene47112  | Potri.001G148100.1 | 20.0312 | 73.3008  | -1.8716 | Down | 7.39E-81  | 1.23E-79  |
| Unigene20280  | Potri.013G090900.1 | 6.1354  | 22.4534  | -1.8717 | Down | 3.76E-23  | 1.86E-22  |
| Unigene16633  | Potri.010G131800.1 | 10.6329 | 38.9124  | -1.8717 | Down | 3.76E-23  | 1.86E-22  |
| Unigene29048  | Potri.010G014800.4 | 5.5422  | 20.2822  | -1.8717 | Down | 1.03E-44  | 9.01E-44  |
| Unigene3178   | Potri.001G257400.1 | 5.86    | 21.4455  | -1.8717 | Down | 3.76E-23  | 1.86E-22  |
| Unigene8030   | Potri.012G043800.2 | 13.6765 | 50.0553  | -1.8718 | Down | 4.81E-73  | 7.09E-72  |
| Unigene19072  | Potri.010G172100.1 | 3.6759  | 13.4533  | -1.8718 | Down | 7.19E-25  | 3.74E-24  |
| Unigene18474  | Potri.004G079300.2 | 3.9104  | 14.3133  | -1.872  | Down | 2.64E-28  | 1.53E-27  |
| Unigene6286   | Potri.003G198700.1 | 9.8958  | 36.2214  | -1.872  | Down | 2.64E-28  | 1.53E-27  |
| Unigene119448 | Potri.006G160500.1 | 8.2575  | 30.2274  | -1.8721 | Down | 8.24E-62  | 1.01E-60  |
| Unigene36879  | Potri.004G092900.5 | 25.6004 | 93.7161  | -1.8721 | Down | 3.15E-65  | 4.11E-64  |
| Unigene2952   | Potri.003G056100.2 | 9.3023  | 34.0553  | -1.8722 | Down | 4.63E-72  | 6.73E-71  |
| Unigene22785  | Potri.009G168500.1 | 9.3615  | 34.2756  | -1.8724 | Down | 1.94E-45  | 1.72E-44  |
| Unigene91699  | Potri.001G004500.1 | 55.0039 | 201.389  | -1.8724 | Down | 5.68E-220 | 3.30E-218 |
| Unigene42443  | Potri.011G003500.2 | 8.5285  | 31.2306  | -1.8726 | Down | 1.75E-256 | 1.25E-254 |
| Unigene93277  | Potri.003G180700.1 | 20.6996 | 75.8088  | -1.8728 | Down | 6.37E-107 | 1.48E-105 |
| Unigene87504  | Potri.008G153800.6 | 68.5982 | 251.2526 | -1.8729 | Down | 1.05E-200 | 5.48E-199 |
| Unigene10435  | Potri.017G042200.2 | 1.9227  | 7.0428   | -1.873  | Down | 1.51E-06  | 3.44E-06  |
| Unigene104858 | Potri.016G100400.1 | 2.0838  | 7.6329   | -1.873  | Down | 2.62E-08  | 6.75E-08  |
| Unigene19515  | Potri.015G013400.1 | 2       | 7.326    | -1.873  | Down | 2.62E-08  | 6.75E-08  |
| Unigene39962  | Potri.014G052600.1 | 28.322  | 103.7446 | -1.873  | Down | 1.12E-182 | 5.18E-181 |
| Unigene99614  | Potri.013G161300.1 | 2.452   | 8.9818   | -1.873  | Down | 9.51E-31  | 5.90E-30  |
| Unigene40509  | Potri.012G072200.1 | 1.5477  | 5.6693   | -1.873  | Down | 9.21E-05  | 1.77E-04  |
| Unigene29848  | Potri.008G071000.1 | 1.3866  | 5.0792   | -1.873  | Down | 9.21E-05  | 1.77E-04  |
| Unigene33583  | Potri.008G049500.1 | 4.6316  | 16.9656  | -1.873  | Down | 2.57E-27  | 1.44E-26  |
| Unigene19320  | Potri.008G047100.2 | 10.1442 | 37.1587  | -1.873  | Down | 7.02E-24  | 3.55E-23  |
| Unigene8090   | Potri.008G044700.2 | 2.1193  | 7.7631   | -1.873  | Down | 1.56E-13  | 5.34E-13  |
| Unigene94634  | Potri.008G037800.1 | 1.4685  | 5.3791   | -1.873  | Down | 9.21E-05  | 1.77E-04  |
| Unigene51033  | Potri.006G063500.2 | 3.8586  | 14.1341  | -1.873  | Down | 8.49E-12  | 2.66E-11  |
| Unigene78640  | Potri.006G056300.1 | 6.2688  | 22.963   | -1.873  | Down | 2.90E-15  | 1.07E-14  |

|               |                    |         |          |         |      |           |           |
|---------------|--------------------|---------|----------|---------|------|-----------|-----------|
| Unigene47017  | Potri.006G045700.2 | 2.4432  | 8.9495   | -1.873  | Down | 1.51E-06  | 3.44E-06  |
| Unigene27372  | Potri.005G215100.1 | 10.32   | 37.8027  | -1.873  | Down | 1.34E-25  | 7.15E-25  |
| Unigene104125 | Potri.005G139000.1 | 1.0537  | 3.8596   | -1.873  | Down | 9.21E-05  | 1.77E-04  |
| Unigene58692  | Potri.005G123000.1 | 1.231   | 4.5092   | -1.873  | Down | 2.62E-08  | 6.75E-08  |
| Unigene3778   | Potri.005G087300.1 | 1.5672  | 5.7407   | -1.873  | Down | 4.67E-10  | 1.34E-09  |
| Unigene105583 | Potri.004G188300.1 | 1.0793  | 3.9534   | -1.873  | Down | 4.67E-10  | 1.34E-09  |
| Unigene52974  | Potri.004G130300.1 | 3.73    | 13.663   | -1.873  | Down | 2.62E-08  | 6.75E-08  |
| Unigene50405  | Potri.003G149600.2 | 6.5438  | 23.9701  | -1.873  | Down | 4.94E-29  | 2.92E-28  |
| Unigene12381  | Potri.003G073100.2 | 4.3372  | 15.8872  | -1.873  | Down | 2.90E-15  | 1.07E-14  |
| Unigene49333  | Potri.001G379100.1 | 1.7349  | 6.3549   | -1.873  | Down | 9.21E-05  | 1.77E-04  |
| Unigene118410 | Potri.001G358900.1 | 0.8516  | 3.1194   | -1.873  | Down | 9.21E-05  | 1.77E-04  |
| Unigene76554  | Potri.001G331400.1 | 9.8589  | 36.1136  | -1.873  | Down | 3.68E-22  | 1.76E-21  |
| Unigene35243  | Potri.001G066100.1 | 1.492   | 5.4652   | -1.873  | Down | 1.51E-06  | 3.44E-06  |
| Unigene89446  | Potri.018G126900.1 | 1.5716  | 5.7569   | -1.8731 | Down | 1.51E-06  | 3.44E-06  |
| Unigene30827  | Potri.015G080400.3 | 1.6954  | 6.2104   | -1.8731 | Down | 8.49E-12  | 2.66E-11  |
| Unigene19657  | Potri.014G070600.1 | 1.1656  | 4.2697   | -1.8731 | Down | 9.21E-05  | 1.77E-04  |
| Unigene8952   | Potri.012G039000.6 | 1.1035  | 4.0423   | -1.8731 | Down | 9.21E-05  | 1.77E-04  |
| Unigene40624  | Potri.012G039000.1 | 1.5413  | 5.6459   | -1.8731 | Down | 1.51E-06  | 3.44E-06  |
| Unigene35753  | Potri.010G193000.1 | 1.6395  | 6.0057   | -1.8731 | Down | 2.62E-08  | 6.75E-08  |
| Unigene37280  | Potri.010G134600.3 | 1.4513  | 5.3163   | -1.8731 | Down | 2.62E-08  | 6.75E-08  |
| Unigene15858  | Potri.002G105100.1 | 1.8048  | 6.6111   | -1.8731 | Down | 8.49E-12  | 2.66E-11  |
| Unigene27870  | Potri.002G024100.1 | 2.7711  | 10.1508  | -1.8731 | Down | 1.02E-18  | 4.35E-18  |
| Unigene12451  | Potri.001G467400.4 | 1.4589  | 5.3441   | -1.8731 | Down | 8.49E-12  | 2.66E-11  |
| Unigene2380   | Potri.001G414000.1 | 0.8338  | 3.0543   | -1.8731 | Down | 1.51E-06  | 3.44E-06  |
| Unigene13220  | Potri.005G094400.1 | 38.5409 | 141.1895 | -1.8732 | Down | 2.61E-224 | 1.55E-222 |
| Unigene2655   | Potri.007G072900.2 | 13.6013 | 49.8297  | -1.8733 | Down | 1.16E-135 | 3.65E-134 |
| Unigene39573  | Potri.007G007600.3 | 10.996  | 40.2932  | -1.8736 | Down | 3.27E-114 | 8.28E-113 |
| Unigene1090   | Potri.005G171500.1 | 3.2514  | 11.915   | -1.8736 | Down | 2.61E-50  | 2.57E-49  |
| Unigene10483  | Potri.003G220100.1 | 13.1804 | 48.2995  | -1.8736 | Down | 5.09E-52  | 5.18E-51  |
| Unigene45061  | Potri.002G242500.1 | 4.3548  | 15.9619  | -1.874  | Down | 3.44E-33  | 2.28E-32  |
| Unigene16449  | Potri.013G073400.1 | 15.4864 | 56.768   | -1.8741 | Down | 7.12E-58  | 8.14E-57  |
| Unigene110266 | Potri.008G185600.6 | 13.7773 | 50.503   | -1.8741 | Down | 9.25E-30  | 5.58E-29  |
| Unigene7578   | Potri.010G188100.2 | 8.4718  | 31.058   | -1.8742 | Down | 2.51E-26  | 1.37E-25  |
| Unigene20457  | Potri.013G032300.1 | 9.9705  | 36.5531  | -1.8743 | Down | 2.52E-49  | 2.43E-48  |
| Unigene104041 | Potri.007G040000.1 | 1.2967  | 4.7539   | -1.8743 | Down | 2.51E-26  | 1.37E-25  |
| Unigene23675  | Potri.004G088700.1 | 3.1945  | 11.7114  | -1.8743 | Down | 2.52E-49  | 2.43E-48  |
| Unigene28082  | Potri.001G129000.1 | 3.2253  | 11.8258  | -1.8744 | Down | 6.86E-23  | 3.36E-22  |
| Unigene33170  | Potri.014G140900.1 | 29.0662 | 106.5782 | -1.8745 | Down | 1.58E-81  | 2.64E-80  |
| Unigene3095   | Potri.011G145800.1 | 2.525   | 9.2588   | -1.8745 | Down | 3.61E-21  | 1.67E-20  |

|               |                    |         |          |         |      |           |           |
|---------------|--------------------|---------|----------|---------|------|-----------|-----------|
| Unigene16077  | Potri.008G080100.2 | 6.2902  | 23.0649  | -1.8745 | Down | 3.61E-21  | 1.67E-20  |
| Unigene22216  | Potri.005G195400.1 | 11.8497 | 43.4493  | -1.8745 | Down | 5.13E-62  | 6.32E-61  |
| Unigene39726  | Potri.016G022900.2 | 4.1631  | 15.2677  | -1.8748 | Down | 1.25E-35  | 8.78E-35  |
| Unigene44781  | Potri.010G005300.1 | 2.3563  | 8.642    | -1.8748 | Down | 1.01E-17  | 4.12E-17  |
| Unigene47839  | Potri.003G176500.1 | 12.3023 | 45.1202  | -1.8748 | Down | 6.45E-34  | 4.35E-33  |
| Unigene50768  | Potri.013G114600.1 | 25.746  | 94.4314  | -1.8749 | Down | 2.24E-125 | 6.37E-124 |
| Unigene12531  | Potri.006G227600.4 | 13.2964 | 48.7695  | -1.8749 | Down | 3.22E-93  | 6.30E-92  |
| Unigene16733  | Potri.004G077800.4 | 4.9995  | 18.3375  | -1.8749 | Down | 3.34E-32  | 2.16E-31  |
| Unigene52427  | Potri.003G024800.1 | 1.8852  | 6.9151   | -1.875  | Down | 5.37E-16  | 2.04E-15  |
| Unigene33247  | Potri.002G126900.1 | 7.5105  | 27.5478  | -1.875  | Down | 3.34E-32  | 2.16E-31  |
| Unigene46281  | Potri.015G140100.1 | 6.5823  | 24.1449  | -1.8751 | Down | 5.37E-16  | 2.04E-15  |
| Unigene37493  | Potri.009G112700.2 | 6.0022  | 22.0172  | -1.8751 | Down | 5.37E-16  | 2.04E-15  |
| Unigene90342  | Potri.002G256400.3 | 23.7539 | 87.1384  | -1.8751 | Down | 1.10E-84  | 1.93E-83  |
| Unigene6776   | Potri.010G057200.3 | 6.7584  | 24.7932  | -1.8752 | Down | 9.00E-29  | 5.28E-28  |
| Unigene33561  | Potri.017G155300.6 | 6.8321  | 25.066   | -1.8753 | Down | 4.69E-27  | 2.61E-26  |
| Unigene107005 | Potri.005G257600.1 | 1.5918  | 5.8401   | -1.8753 | Down | 2.88E-14  | 1.02E-13  |
| Unigene71652  | Potri.004G196300.2 | 6.7651  | 24.8203  | -1.8753 | Down | 2.88E-14  | 1.02E-13  |
| Unigene105893 | Potri.003G063000.8 | 22.8771 | 83.9424  | -1.8755 | Down | 2.26E-96  | 4.60E-95  |
| Unigene44329  | Potri.004G038700.1 | 4.453   | 16.3401  | -1.8756 | Down | 2.34E-36  | 1.68E-35  |
| Unigene78428  | Potri.019G051300.1 | 5.0362  | 18.4818  | -1.8757 | Down | 1.56E-12  | 5.08E-12  |
| Unigene51179  | Potri.003G204300.3 | 3.5736  | 13.1143  | -1.8757 | Down | 1.56E-12  | 5.08E-12  |
| Unigene33207  | Potri.016G043800.5 | 9.1391  | 33.541   | -1.8758 | Down | 6.22E-44  | 5.33E-43  |
| Unigene65160  | Potri.012G095400.1 | 9.4069  | 34.5286  | -1.876  | Down | 3.25E-31  | 2.04E-30  |
| Unigene3883   | Potri.018G067800.4 | 34.4893 | 126.6109 | -1.8762 | Down | 2.09E-94  | 4.15E-93  |
| Unigene17316  | Potri.018G020200.5 | 2.8733  | 10.5479  | -1.8762 | Down | 3.54E-20  | 1.58E-19  |
| Unigene15147  | Potri.018G016800.1 | 14.1346 | 51.8883  | -1.8762 | Down | 8.50E-39  | 6.47E-38  |
| Unigene41695  | Potri.005G051100.3 | 1.3464  | 4.9426   | -1.8762 | Down | 8.52E-11  | 2.54E-10  |
| Unigene89429  | Potri.002G169100.2 | 25.0065 | 91.8034  | -1.8762 | Down | 1.93E-83  | 3.31E-82  |
| Unigene46955  | Potri.002G160200.1 | 9.6372  | 35.3784  | -1.8762 | Down | 3.54E-20  | 1.58E-19  |
| Unigene108864 | Potri.001G289800.1 | 4.7957  | 17.6049  | -1.8762 | Down | 8.52E-11  | 2.54E-10  |
| Unigene11428  | Potri.005G249300.1 | 11.3231 | 41.5782  | -1.8766 | Down | 5.65E-101 | 1.22E-99  |
| Unigene18843  | Potri.006G081800.2 | 7.7159  | 28.3355  | -1.8767 | Down | 1.51E-144 | 5.14E-143 |
| Unigene1211   | Potri.016G139500.1 | 5.1893  | 19.0579  | -1.8768 | Down | 6.24E-64  | 7.95E-63  |
| Unigene1875   | Potri.006G187500.1 | 4.8851  | 17.9409  | -1.8768 | Down | 6.24E-64  | 7.95E-63  |
| Unigene10350  | Potri.015G016400.1 | 2.4064  | 8.8384   | -1.8769 | Down | 4.74E-09  | 1.28E-08  |
| Unigene49794  | Potri.014G025700.1 | 2.1882  | 8.037    | -1.8769 | Down | 4.74E-09  | 1.28E-08  |
| Unigene22063  | Potri.010G087400.1 | 9.3539  | 34.3552  | -1.8769 | Down | 6.86E-85  | 1.21E-83  |
| Unigene107145 | Potri.008G214200.1 | 1.3631  | 5.0065   | -1.8769 | Down | 4.74E-09  | 1.28E-08  |
| Unigene8497   | Potri.006G065900.1 | 5.6463  | 20.7378  | -1.8769 | Down | 2.39E-24  | 1.22E-23  |

|               |                    |         |          |         |      |           |           |
|---------------|--------------------|---------|----------|---------|------|-----------|-----------|
| Unigene13015  | Potri.002G185000.1 | 4.5527  | 16.7241  | -1.8771 | Down | 3.16E-30  | 1.93E-29  |
| Unigene7082   | Potri.001G341300.4 | 11.1764 | 41.0556  | -1.8771 | Down | 3.16E-30  | 1.93E-29  |
| Unigene21168  | Potri.007G113300.1 | 5.1015  | 18.7411  | -1.8772 | Down | 1.25E-22  | 6.07E-22  |
| Unigene43495  | Potri.016G096600.2 | 3.4228  | 12.5756  | -1.8774 | Down | 1.64E-28  | 9.54E-28  |
| Unigene93447  | Potri.001G130800.2 | 2.5168  | 9.2468   | -1.8774 | Down | 5.31E-15  | 1.94E-14  |
| Unigene22614  | Potri.019G003100.1 | 13.9206 | 51.156   | -1.8777 | Down | 3.10E-127 | 8.96E-126 |
| Unigene53872  | Potri.T010700.4    | 10.8748 | 39.9662  | -1.8778 | Down | 1.55E-38  | 1.17E-37  |
| Unigene6270   | Potri.008G156300.2 | 13.6959 | 50.3362  | -1.8779 | Down | 2.95E-50  | 2.90E-49  |
| Unigene53617  | Potri.002G074800.1 | 34.6471 | 127.3425 | -1.8779 | Down | 1.16E-73  | 1.73E-72  |
| Unigene7146   | Potri.016G061500.4 | 1.5026  | 5.5231   | -1.878  | Down | 2.70E-07  | 6.50E-07  |
| Unigene29558  | Potri.006G275100.1 | 7.3561  | 27.0388  | -1.878  | Down | 5.91E-31  | 3.68E-30  |
| Unigene47224  | Potri.004G172600.1 | 8.0265  | 29.5031  | -1.878  | Down | 3.48E-19  | 1.50E-18  |
| Unigene101917 | Potri.001G140000.1 | 2.0066  | 7.3758   | -1.878  | Down | 2.70E-07  | 6.50E-07  |
| Unigene36383  | Potri.017G074400.1 | 1.1656  | 4.2845   | -1.8781 | Down | 2.70E-07  | 6.50E-07  |
| Unigene92567  | Potri.008G012100.1 | 1.3047  | 4.7958   | -1.8781 | Down | 2.70E-07  | 6.50E-07  |
| Unigene10936  | Potri.018G050300.1 | 7.6643  | 28.1747  | -1.8782 | Down | 1.52E-58  | 1.76E-57  |
| Unigene50085  | Potri.016G091100.1 | 4.4612  | 16.4011  | -1.8783 | Down | 4.13E-35  | 2.86E-34  |
| Unigene5965   | Potri.005G005400.5 | 31.0457 | 114.1388 | -1.8783 | Down | 3.22E-145 | 1.11E-143 |
| Unigene34799  | Potri.002G025100.2 | 14.934  | 54.902   | -1.8783 | Down | 2.19E-74  | 3.29E-73  |
| Unigene80011  | Potri.008G201900.1 | 38.3653 | 141.0583 | -1.8784 | Down | 1.65E-88  | 3.02E-87  |
| Unigene8832   | Potri.001G151700.4 | 7.4128  | 27.255   | -1.8784 | Down | 2.34E-23  | 1.16E-22  |
| Unigene42685  | Potri.007G133400.1 | 5.771   | 21.2192  | -1.8785 | Down | 8.09E-77  | 1.27E-75  |
| Unigene44876  | Potri.004G223700.1 | 21.6411 | 79.5747  | -1.8785 | Down | 1.25E-102 | 2.77E-101 |
| Unigene15664  | Potri.008G107300.1 | 23.3671 | 85.9254  | -1.8786 | Down | 4.13E-75  | 6.29E-74  |
| Unigene49362  | Potri.003G143000.1 | 5.5527  | 20.4177  | -1.8786 | Down | 1.84E-17  | 7.45E-17  |
| Unigene11938  | Potri.001G389200.1 | 16.904  | 62.1587  | -1.8786 | Down | 9.17E-107 | 2.12E-105 |
| Unigene43789  | Potri.018G111900.1 | 28.5275 | 104.9104 | -1.8787 | Down | 5.50E-135 | 1.72E-133 |
| Unigene2766   | Potri.019G035100.1 | 7.2193  | 26.5501  | -1.8788 | Down | 1.46E-57  | 1.66E-56  |
| Unigene86360  | Potri.008G011300.1 | 79.6798 | 293.0449 | -1.8788 | Down | 5.18E-223 | 3.05E-221 |
| Unigene80450  | Potri.005G093100.2 | 37.45   | 137.7316 | -1.8788 | Down | 1.58E-87  | 2.87E-86  |
| Unigene50950  | Potri.018G085200.1 | 4.2253  | 15.5404  | -1.8789 | Down | 1.56E-11  | 4.83E-11  |
| Unigene102333 | Potri.010G114400.2 | 2.7807  | 10.2271  | -1.8789 | Down | 1.23E-21  | 5.76E-21  |
| Unigene79215  | Potri.005G216200.2 | 15.3222 | 56.3593  | -1.879  | Down | 7.74E-36  | 5.49E-35  |
| Unigene24432  | Potri.015G055400.1 | 5.6953  | 20.951   | -1.8792 | Down | 2.80E-68  | 3.83E-67  |
| Unigene25529  | Potri.011G118200.3 | 5.2194  | 19.2011  | -1.8792 | Down | 9.82E-16  | 3.69E-15  |
| Unigene27945  | Potri.014G085300.3 | 8.9443  | 32.9068  | -1.8793 | Down | 4.00E-34  | 2.71E-33  |
| Unigene32173  | Potri.019G001000.1 | 5.1576  | 18.9758  | -1.8794 | Down | 3.14E-107 | 7.32E-106 |
| Unigene85532  | Potri.014G155100.1 | 49.2611 | 181.2491 | -1.8795 | Down | 9.57E-134 | 2.96E-132 |
| Unigene79030  | Potri.001G052100.1 | 18.3389 | 67.4777  | -1.8795 | Down | 1.99E-42  | 1.65E-41  |

|               |                    |         |          |         |      |           |           |
|---------------|--------------------|---------|----------|---------|------|-----------|-----------|
| Unigene31867  | Potri.016G041100.1 | 4.6136  | 16.9764  | -1.8796 | Down | 6.45E-181 | 2.96E-179 |
| Unigene50041  | Potri.011G044200.1 | 4.2684  | 15.7062  | -1.8796 | Down | 4.36E-24  | 2.22E-23  |
| Unigene9609   | Potri.012G104500.1 | 8.3903  | 30.8773  | -1.8798 | Down | 1.45E-36  | 1.05E-35  |
| Unigene40364  | Potri.001G098500.2 | 4.3153  | 15.8808  | -1.8798 | Down | 1.45E-36  | 1.05E-35  |
| Unigene118738 | Potri.009G135600.2 | 0.9306  | 3.4254   | -1.88   | Down | 1.60E-05  | 3.32E-05  |
| Unigene14725  | Potri.016G095900.2 | 8.7032  | 32.0365  | -1.8801 | Down | 1.08E-30  | 6.67E-30  |
| Unigene36119  | Potri.016G017400.1 | 0.8759  | 3.2243   | -1.8801 | Down | 1.60E-05  | 3.32E-05  |
| Unigene117184 | Potri.013G057000.2 | 1.2825  | 4.7209   | -1.8801 | Down | 1.60E-05  | 3.32E-05  |
| Unigene83386  | Potri.012G011700.2 | 6.6557  | 24.4995  | -1.8801 | Down | 3.42E-18  | 1.42E-17  |
| Unigene42168  | Potri.010G132300.2 | 1.4485  | 5.332    | -1.8801 | Down | 1.60E-05  | 3.32E-05  |
| Unigene10281  | Potri.008G123600.2 | 1.6516  | 6.0797   | -1.8801 | Down | 1.60E-05  | 3.32E-05  |
| Unigene92833  | Potri.004G113800.2 | 1.7587  | 6.4738   | -1.8801 | Down | 8.60E-10  | 2.42E-09  |
| Unigene103929 | Potri.004G084900.1 | 1.1779  | 4.3358   | -1.8801 | Down | 1.60E-05  | 3.32E-05  |
| Unigene94867  | Potri.001G205500.2 | 1.9805  | 7.2902   | -1.8801 | Down | 8.60E-10  | 2.42E-09  |
| Unigene20728  | Potri.001G171100.1 | 1.7691  | 6.5122   | -1.8801 | Down | 1.60E-05  | 3.32E-05  |
| Unigene99083  | Potri.004G087400.1 | 0.8916  | 3.2821   | -1.8802 | Down | 1.60E-05  | 3.32E-05  |
| Unigene14088  | Potri.010G080600.1 | 19.0424 | 70.1126  | -1.8805 | Down | 9.59E-69  | 1.32E-67  |
| Unigene12265  | Potri.009G052900.1 | 13.6494 | 50.2578  | -1.8805 | Down | 2.36E-146 | 8.19E-145 |
| Unigene11235  | Potri.013G127200.3 | 10.825  | 39.8603  | -1.8806 | Down | 1.11E-125 | 3.15E-124 |
| Unigene57445  | Potri.T120400.3    | 6.6606  | 24.5286  | -1.8807 | Down | 1.20E-20  | 5.47E-20  |
| Unigene16693  | Potri.008G200800.1 | 8.4077  | 30.9624  | -1.8807 | Down | 1.20E-20  | 5.47E-20  |
| Unigene8836   | Potri.007G087200.4 | 17.1928 | 63.3126  | -1.8807 | Down | 6.79E-63  | 8.49E-62  |
| Unigene21504  | Potri.005G251800.1 | 3.1867  | 11.7348  | -1.8807 | Down | 7.03E-44  | 6.01E-43  |
| Unigene277    | Potri.018G105300.3 | 4.6489  | 17.1224  | -1.8809 | Down | 2.02E-31  | 1.27E-30  |
| Unigene77586  | Potri.011G168300.1 | 6.9133  | 25.4622  | -1.8809 | Down | 1.82E-16  | 7.06E-16  |
| Unigene107246 | Potri.010G142700.1 | 8.0194  | 29.5361  | -1.8809 | Down | 1.82E-16  | 7.06E-16  |
| Unigene51021  | Potri.008G119700.1 | 17.74   | 65.3418  | -1.881  | Down | 3.62E-42  | 2.98E-41  |
| Unigene13901  | Potri.001G024300.1 | 4.9296  | 18.1566  | -1.881  | Down | 6.68E-72  | 9.67E-71  |
| Unigene81192  | Potri.014G024800.7 | 36.5624 | 134.6919 | -1.8812 | Down | 1.78E-87  | 3.24E-86  |
| Unigene42797  | Potri.002G214400.2 | 8.8859  | 32.7329  | -1.8812 | Down | 1.78E-59  | 2.09E-58  |
| Unigene92475  | Potri.003G174800.2 | 17.4065 | 64.1289  | -1.8813 | Down | 3.38E-79  | 5.49E-78  |
| Unigene84267  | Potri.005G194500.2 | 15.0814 | 55.5629  | -1.8814 | Down | 1.86E-40  | 1.48E-39  |
| Unigene37905  | Potri.001G170700.1 | 12.0265 | 44.3164  | -1.8816 | Down | 1.52E-25  | 8.08E-25  |
| Unigene79771  | Potri.014G085300.3 | 46.1658 | 170.1283 | -1.8817 | Down | 3.40E-106 | 7.82E-105 |
| Unigene108353 | Potri.013G114600.1 | 22.7041 | 83.6706  | -1.8818 | Down | 2.48E-45  | 2.20E-44  |
| Unigene23354  | Potri.006G230900.4 | 3.2301  | 11.9037  | -1.8818 | Down | 2.48E-45  | 2.20E-44  |
| Unigene861    | Potri.009G155500.3 | 3.8848  | 14.3181  | -1.8819 | Down | 9.09E-48  | 8.48E-47  |
| Unigene12330  | Potri.008G160400.2 | 0.9708  | 3.5781   | -1.8819 | Down | 4.85E-08  | 1.23E-07  |
| Unigene52175  | Potri.005G259600.1 | 2.5585  | 9.4297   | -1.8819 | Down | 4.85E-08  | 1.23E-07  |

|               |                    |          |          |         |      |           |           |
|---------------|--------------------|----------|----------|---------|------|-----------|-----------|
| Unigene11597  | Potri.004G212600.3 | 1.7356   | 6.3968   | -1.8819 | Down | 2.24E-21  | 1.04E-20  |
| Unigene94715  | Potri.001G148100.1 | 3.3909   | 12.4978  | -1.8819 | Down | 4.85E-08  | 1.23E-07  |
| Unigene119157 | Potri.002G181000.1 | 1.1831   | 4.3607   | -1.882  | Down | 4.85E-08  | 1.23E-07  |
| Unigene20839  | Potri.001G452800.3 | 2.4693   | 9.1012   | -1.882  | Down | 4.85E-08  | 1.23E-07  |
| Unigene31934  | Potri.019G066500.1 | 15.245   | 56.1991  | -1.8822 | Down | 3.20E-209 | 1.75E-207 |
| Unigene52479  | Potri.015G002200.4 | 17.1992  | 63.4033  | -1.8822 | Down | 6.11E-88  | 1.12E-86  |
| Unigene18159  | Potri.001G399700.1 | 5.4989   | 20.271   | -1.8822 | Down | 1.96E-30  | 1.20E-29  |
| Unigene7922   | Potri.010G140100.2 | 11.8913  | 43.8384  | -1.8823 | Down | 2.27E-90  | 4.27E-89  |
| Unigene73991  | Potri.008G117700.1 | 11.155   | 41.1241  | -1.8823 | Down | 7.94E-24  | 4.01E-23  |
| Unigene6570   | Potri.008G092800.1 | 3.6115   | 13.314   | -1.8823 | Down | 7.94E-24  | 4.01E-23  |
| Unigene31832  | Potri.003G182600.1 | 3.9941   | 14.7266  | -1.8825 | Down | 1.15E-88  | 2.13E-87  |
| Unigene41157  | Potri.002G026400.1 | 40.2022  | 148.2318 | -1.8825 | Down | 1.16E-97  | 2.40E-96  |
| Unigene40170  | Potri.008G188800.6 | 4.1379   | 15.2578  | -1.8826 | Down | 2.84E-26  | 1.54E-25  |
| Unigene15481  | Potri.015G065400.1 | 29.8882  | 110.2148 | -1.8827 | Down | 5.88E-87  | 1.06E-85  |
| Unigene77592  | Potri.012G131000.2 | 123.9567 | 457.1067 | -1.8827 | Down | 1.88E-268 | 1.43E-266 |
| Unigene50469  | Potri.012G092500.4 | 20.8131  | 76.7537  | -1.8827 | Down | 2.19E-98  | 4.59E-97  |
| Unigene22444  | Potri.001G123500.1 | 29.5038  | 108.7972 | -1.8827 | Down | 5.88E-87  | 1.06E-85  |
| Unigene8388   | Potri.019G041900.1 | 20.4865  | 75.5502  | -1.8828 | Down | 2.40E-152 | 8.80E-151 |
| Unigene44477  | Potri.016G024900.2 | 2.3769   | 8.7659   | -1.8828 | Down | 1.57E-10  | 4.61E-10  |
| Unigene45491  | Potri.012G121700.8 | 5.3432   | 19.7051  | -1.8828 | Down | 9.31E-38  | 6.92E-37  |
| Unigene21519  | Potri.011G124000.1 | 3.9199   | 14.4563  | -1.8828 | Down | 8.78E-47  | 8.02E-46  |
| Unigene16987  | Potri.008G072100.1 | 5.3678   | 19.796   | -1.8828 | Down | 1.02E-28  | 5.96E-28  |
| Unigene70130  | Potri.019G053000.3 | 7.2304   | 26.6665  | -1.8829 | Down | 3.04E-67  | 4.10E-66  |
| Unigene18225  | Potri.002G043500.1 | 4.7676   | 17.5848  | -1.883  | Down | 3.67E-31  | 2.30E-30  |
| Unigene76220  | Potri.005G257000.2 | 9.7808   | 36.0774  | -1.8831 | Down | 4.17E-22  | 1.99E-21  |
| Unigene38299  | Potri.001G068900.1 | 4.6265   | 17.0653  | -1.8831 | Down | 4.22E-63  | 5.29E-62  |
| Unigene47346  | Potri.001G101700.5 | 9.6122   | 35.4575  | -1.8832 | Down | 1.33E-33  | 8.87E-33  |
| Unigene33056  | Potri.007G063600.1 | 2.0583   | 7.5935   | -1.8833 | Down | 5.25E-13  | 1.75E-12  |
| Unigene42513  | Potri.014G094900.4 | 9.5742   | 35.3232  | -1.8834 | Down | 7.89E-135 | 2.46E-133 |
| Unigene15751  | Potri.005G167700.1 | 18.8074  | 69.3902  | -1.8834 | Down | 7.95E-64  | 1.01E-62  |
| Unigene34752  | Potri.016G051200.1 | 13.2611  | 48.9294  | -1.8835 | Down | 2.03E-105 | 4.62E-104 |
| Unigene26944  | Potri.004G138000.1 | 12.0481  | 44.4527  | -1.8835 | Down | 5.30E-27  | 2.95E-26  |
| Unigene45638  | Potri.012G120100.1 | 1.9973   | 7.37     | -1.8836 | Down | 1.80E-15  | 6.68E-15  |
| Unigene13307  | Potri.008G143000.1 | 1.6764   | 6.1858   | -1.8836 | Down | 1.80E-15  | 6.68E-15  |
| Unigene504    | Potri.006G272900.1 | 4.8635   | 17.9497  | -1.8839 | Down | 5.33E-137 | 1.70E-135 |
| Unigene45223  | Potri.002G088400.1 | 19.2985  | 71.2268  | -1.8839 | Down | 1.41E-125 | 4.00E-124 |
| Unigene4517   | Potri.001G255800.1 | 9.0208   | 33.3057  | -1.8844 | Down | 1.29E-32  | 8.40E-32  |
| Unigene40945  | Potri.002G066900.3 | 7.1945   | 26.5644  | -1.8845 | Down | 1.69E-37  | 1.25E-36  |
| Unigene114821 | Potri.014G128800.1 | 29.6242  | 109.385  | -1.8846 | Down | 3.66E-78  | 5.85E-77  |



|               |                    |         |          |         |      |           |           |
|---------------|--------------------|---------|----------|---------|------|-----------|-----------|
| Unigene13595  | Potri.004G209500.1 | 6.1109  | 22.5649  | -1.8846 | Down | 1.86E-85  | 3.29E-84  |
| Unigene10393  | Potri.002G131400.1 | 13.1351 | 48.5031  | -1.8846 | Down | 3.00E-47  | 2.77E-46  |
| Unigene32793  | Potri.014G061000.1 | 11.1758 | 41.2706  | -1.8847 | Down | 2.50E-167 | 1.04E-165 |
| Unigene10605  | Potri.010G200200.2 | 10.3412 | 38.1877  | -1.8847 | Down | 0         | 0         |
| Unigene24397  | Potri.007G021600.1 | 4.0449  | 14.9364  | -1.8847 | Down | 3.00E-47  | 2.77E-46  |
| Unigene74246  | Potri.003G200300.2 | 55.1686 | 203.7296 | -1.8847 | Down | 3.43E-112 | 8.49E-111 |
| Unigene23148  | Potri.001G123500.1 | 21.0161 | 77.605   | -1.8847 | Down | 9.48E-93  | 1.84E-91  |
| Unigene16877  | Potri.008G078500.3 | 17.7764 | 65.6469  | -1.8848 | Down | 7.38E-62  | 9.05E-61  |
| Unigene12042  | Potri.001G081600.1 | 19.7887 | 73.0849  | -1.8849 | Down | 2.46E-98  | 5.17E-97  |
| Unigene81848  | Potri.008G138400.3 | 77.9372 | 287.8637 | -1.885  | Down | 3.37E-188 | 1.63E-186 |
| Unigene29935  | Potri.019G064500.1 | 1.7822  | 6.5832   | -1.8851 | Down | 2.82E-06  | 6.25E-06  |
| Unigene47247  | Potri.018G138200.1 | 7.8329  | 28.9333  | -1.8851 | Down | 3.32E-16  | 1.28E-15  |
| Unigene35331  | Potri.016G120700.2 | 1.8259  | 6.7444   | -1.8851 | Down | 2.82E-06  | 6.25E-06  |
| Unigene12986  | Potri.014G154500.1 | 0.9767  | 3.6076   | -1.8851 | Down | 8.75E-09  | 2.33E-08  |
| Unigene118836 | Potri.014G095300.1 | 1.0402  | 3.8424   | -1.8851 | Down | 2.82E-06  | 6.25E-06  |
| Unigene24566  | Potri.011G057300.5 | 1.4566  | 5.3804   | -1.8851 | Down | 2.86E-11  | 8.77E-11  |
| Unigene42995  | Potri.011G056000.2 | 0.9779  | 3.6122   | -1.8851 | Down | 8.75E-09  | 2.33E-08  |
| Unigene52928  | Potri.009G028500.1 | 4.4379  | 16.3928  | -1.8851 | Down | 3.32E-16  | 1.28E-15  |
| Unigene30588  | Potri.009G006200.1 | 1.6167  | 5.9718   | -1.8851 | Down | 2.82E-06  | 6.25E-06  |
| Unigene7714   | Potri.005G053200.1 | 2.2648  | 8.3657   | -1.8851 | Down | 1.16E-18  | 4.91E-18  |
| Unigene104668 | Potri.004G133700.2 | 1.367   | 5.0494   | -1.8851 | Down | 2.82E-06  | 6.25E-06  |
| Unigene42070  | Potri.003G146000.4 | 3.0419  | 11.2363  | -1.8851 | Down | 3.32E-16  | 1.28E-15  |
| Unigene48939  | Potri.001G442900.1 | 1.3276  | 4.904    | -1.8851 | Down | 8.75E-09  | 2.33E-08  |
| Unigene46209  | Potri.001G190800.5 | 1.3528  | 4.9971   | -1.8851 | Down | 2.82E-06  | 6.25E-06  |
| Unigene119092 | Potri.010G142700.1 | 0.9113  | 3.3663   | -1.8852 | Down | 2.82E-06  | 6.25E-06  |
| Unigene44556  | Potri.011G021000.1 | 10.4861 | 38.7446  | -1.8855 | Down | 1.43E-53  | 1.50E-52  |
| Unigene34555  | Potri.002G131200.1 | 10.7544 | 39.7364  | -1.8855 | Down | 1.66E-100 | 3.58E-99  |
| Unigene47725  | Potri.016G051500.3 | 1.984   | 7.3317   | -1.8857 | Down | 1.64E-36  | 1.18E-35  |
| Unigene87682  | Potri.008G153800.6 | 59.0965 | 218.3815 | -1.8857 | Down | 5.70E-178 | 2.55E-176 |
| Unigene21535  | Potri.005G236600.1 | 2.6624  | 9.8383   | -1.8857 | Down | 1.64E-36  | 1.18E-35  |
| Unigene29718  | Potri.005G253400.1 | 11.0294 | 40.7613  | -1.8858 | Down | 3.64E-59  | 4.26E-58  |
| Unigene106629 | Potri.002G188300.1 | 3.4381  | 12.7059  | -1.8858 | Down | 1.25E-31  | 7.95E-31  |
| Unigene46511  | Potri.015G017500.1 | 8.2127  | 30.354   | -1.886  | Down | 9.66E-27  | 5.33E-26  |
| Unigene18546  | Potri.008G150500.2 | 26.6516 | 98.5053  | -1.886  | Down | 3.97E-147 | 1.39E-145 |
| Unigene53180  | Potri.007G036100.2 | 11.0517 | 40.8467  | -1.886  | Down | 9.66E-27  | 5.33E-26  |
| Unigene315    | Potri.017G094600.1 | 2.4947  | 9.2214   | -1.8861 | Down | 1.49E-44  | 1.29E-43  |
| Unigene2654   | Potri.008G087700.3 | 23.5104 | 86.907   | -1.8862 | Down | 2.07E-120 | 5.61E-119 |
| Unigene1156   | Potri.016G110500.1 | 15.9942 | 59.1268  | -1.8863 | Down | 5.89E-93  | 1.15E-91  |
| Unigene112004 | Potri.006G023400.4 | 7.9928  | 29.5479  | -1.8863 | Down | 2.15E-19  | 9.37E-19  |

|               |                    |         |          |         |      |           |           |
|---------------|--------------------|---------|----------|---------|------|-----------|-----------|
| Unigene21189  | Potri.017G001300.1 | 8.3028  | 30.698   | -1.8865 | Down | 1.03E-47  | 9.55E-47  |
| Unigene6614   | Potri.016G062100.1 | 7.1201  | 26.3252  | -1.8865 | Down | 2.34E-32  | 1.52E-31  |
| Unigene17691  | Potri.011G006100.1 | 2.5927  | 9.586    | -1.8865 | Down | 6.16E-17  | 2.44E-16  |
| Unigene15492  | Potri.009G028000.1 | 35.2173 | 130.2118 | -1.8865 | Down | 2.52E-272 | 1.95E-270 |
| Unigene21524  | Potri.013G064300.4 | 6.1128  | 22.6029  | -1.8866 | Down | 1.44E-114 | 3.65E-113 |
| Unigene41570  | Potri.010G076500.2 | 12.1584 | 44.9586  | -1.8866 | Down | 7.67E-43  | 6.42E-42  |
| Unigene17788  | Potri.014G040200.1 | 2.0847  | 7.7092   | -1.8867 | Down | 1.78E-14  | 6.34E-14  |
| Unigene36783  | Potri.010G102100.3 | 9.3459  | 34.5611  | -1.8867 | Down | 2.10E-40  | 1.66E-39  |
| Unigene36698  | Potri.007G086900.2 | 13.1437 | 48.605   | -1.8867 | Down | 1.81E-27  | 1.02E-26  |
| Unigene43897  | Potri.006G196200.1 | 6.6191  | 24.4773  | -1.8867 | Down | 1.81E-27  | 1.02E-26  |
| Unigene21985  | Potri.002G201500.2 | 14.7515 | 54.5507  | -1.8867 | Down | 1.01E-117 | 2.66E-116 |
| Unigene119356 | Potri.005G074700.1 | 1.9383  | 7.1679   | -1.8868 | Down | 1.78E-14  | 6.35E-14  |
| Unigene82385  | Potri.013G144000.1 | 27.7246 | 102.5416 | -1.887  | Down | 2.30E-69  | 3.20E-68  |
| Unigene47652  | Potri.008G120400.1 | 62.2769 | 230.3473 | -1.887  | Down | 4.88E-132 | 1.48E-130 |
| Unigene38627  | Potri.005G080500.2 | 7.8941  | 29.1998  | -1.8871 | Down | 1.44E-43  | 1.23E-42  |
| Unigene13619  | Potri.001G468700.1 | 1.8934  | 7.0035   | -1.8871 | Down | 5.25E-12  | 1.67E-11  |
| Unigene51911  | Potri.008G138900.1 | 14.1687 | 52.4155  | -1.8873 | Down | 1.24E-59  | 1.47E-58  |
| Unigene32695  | Potri.006G108800.1 | 13.0594 | 48.3137  | -1.8873 | Down | 6.22E-152 | 2.27E-150 |
| Unigene34781  | Potri.010G201100.1 | 10.852  | 40.1502  | -1.8874 | Down | 3.46E-118 | 9.15E-117 |
| Unigene4169   | Potri.008G055400.1 | 12.9345 | 47.855   | -1.8874 | Down | 9.90E-47  | 9.03E-46  |
| Unigene8394   | Potri.004G208400.2 | 9.4441  | 34.9437  | -1.8875 | Down | 2.58E-105 | 5.86E-104 |
| Unigene70803  | Potri.002G229200.2 | 50.8462 | 188.1307 | -1.8875 | Down | 2.67E-97  | 5.51E-96  |
| Unigene53242  | Potri.017G106800.3 | 6.3784  | 23.6032  | -1.8877 | Down | 1.14E-17  | 4.65E-17  |
| Unigene24093  | Potri.015G147200.1 | 11.9567 | 44.2457  | -1.8877 | Down | 6.00E-66  | 7.92E-65  |
| Unigene310    | Potri.015G083300.1 | 4.6408  | 17.1734  | -1.8877 | Down | 6.36E-58  | 7.28E-57  |
| Unigene39773  | Potri.011G042400.2 | 4.1494  | 15.3549  | -1.8877 | Down | 6.00E-66  | 7.92E-65  |
| Unigene39789  | Potri.005G111700.1 | 1.2066  | 4.465    | -1.8877 | Down | 1.59E-09  | 4.40E-09  |
| Unigene12734  | Potri.006G188100.1 | 1.6035  | 5.9339   | -1.8878 | Down | 1.59E-09  | 4.40E-09  |
| Unigene43426  | Potri.006G190200.1 | 2.6329  | 9.7443   | -1.8879 | Down | 2.04E-39  | 1.57E-38  |
| Unigene49464  | Potri.002G246000.2 | 9.2606  | 34.2729  | -1.8879 | Down | 2.04E-39  | 1.57E-38  |
| Unigene19242  | Potri.005G189600.1 | 26.6814 | 98.752   | -1.888  | Down | 2.48E-104 | 5.57E-103 |
| Unigene33915  | Potri.018G039800.1 | 8.957   | 33.1545  | -1.8881 | Down | 1.28E-50  | 1.27E-49  |
| Unigene63772  | Potri.019G051200.1 | 7.096   | 26.2674  | -1.8882 | Down | 3.29E-15  | 1.21E-14  |
| Unigene32905  | Potri.004G235200.3 | 8.6422  | 31.9917  | -1.8882 | Down | 3.66E-176 | 1.62E-174 |
| Unigene9940   | Potri.001G319000.3 | 17.1588 | 63.5169  | -1.8882 | Down | 3.10E-124 | 8.71E-123 |
| Unigene104933 | Potri.014G049300.1 | 7.148   | 26.4634  | -1.8884 | Down | 7.45E-21  | 3.41E-20  |
| Unigene12272  | Potri.012G005100.1 | 14.6619 | 54.2835  | -1.8884 | Down | 6.20E-109 | 1.47E-107 |
| Unigene6612   | Potri.010G119500.1 | 18.2078 | 67.4197  | -1.8886 | Down | 1.03E-73  | 1.54E-72  |
| Unigene1965   | Potri.011G108900.3 | 8.4364  | 31.2393  | -1.8887 | Down | 1.79E-90  | 3.37E-89  |

|               |                     |          |          |         |      |           |           |
|---------------|---------------------|----------|----------|---------|------|-----------|-----------|
| Unigene30955  | Potri.006G254100.1  | 20.4066  | 75.5657  | -1.8887 | Down | 1.67E-54  | 1.78E-53  |
| Unigene1053   | Potri.013G106600.1  | 20.1936  | 74.7817  | -1.8888 | Down | 5.55E-230 | 3.41E-228 |
| Unigene52898  | Potri.011G094800.1  | 1.5071   | 5.5813   | -1.8888 | Down | 5.01E-07  | 1.18E-06  |
| Unigene8876   | Potri.005G147400.3  | 1.842    | 6.8216   | -1.8888 | Down | 9.63E-13  | 3.17E-12  |
| Unigene8540   | Potri.002G089600.1  | 1.2698   | 4.7025   | -1.8888 | Down | 5.01E-07  | 1.18E-06  |
| Unigene15589  | Potri.016G036500.1  | 16.5012  | 61.1111  | -1.8889 | Down | 2.89E-35  | 2.02E-34  |
| Unigene44058  | Potri.014G178600.1  | 3.5843   | 13.2744  | -1.8889 | Down | 9.63E-13  | 3.17E-12  |
| Unigene10321  | Potri.014G157600.1  | 1.1411   | 4.226    | -1.8889 | Down | 5.01E-07  | 1.18E-06  |
| Unigene25430  | Potri.005G052100.1  | 9.2766   | 34.3552  | -1.8889 | Down | 2.89E-35  | 2.02E-34  |
| Unigene105968 | Potri.005G042200.1  | 1.0714   | 3.968    | -1.8889 | Down | 5.01E-07  | 1.18E-06  |
| Unigene67698  | Potri.001G368000.14 | 1.674    | 6.1997   | -1.8889 | Down | 9.63E-13  | 3.17E-12  |
| Unigene80893  | Potri.017G108800.1  | 80.0974  | 296.6661 | -1.889  | Down | 5.91E-190 | 2.89E-188 |
| Unigene27412  | Potri.008G006100.1  | 14.6534  | 54.2761  | -1.8891 | Down | 4.92E-44  | 4.22E-43  |
| Unigene109814 | Potri.016G116200.3  | 9.7526   | 36.1298  | -1.8893 | Down | 1.39E-21  | 6.50E-21  |
| Unigene6746   | Potri.007G070100.1  | 13.6872  | 50.7058  | -1.8893 | Down | 1.51E-61  | 1.84E-60  |
| Unigene32805  | Potri.001G207900.1  | 9.8656   | 36.5465  | -1.8893 | Down | 3.90E-118 | 1.03E-116 |
| Unigene34197  | Potri.017G058200.1  | 8.9878   | 33.2994  | -1.8895 | Down | 1.05E-64  | 1.35E-63  |
| Unigene85292  | Potri.012G056000.2  | 23.3934  | 86.6712  | -1.8895 | Down | 1.05E-64  | 1.35E-63  |
| Unigene14254  | Potri.010G097000.1  | 3.8864   | 14.3993  | -1.8895 | Down | 2.21E-30  | 1.36E-29  |
| Unigene48206  | Potri.009G061000.4  | 6.7074   | 24.8514  | -1.8895 | Down | 6.08E-16  | 2.31E-15  |
| Unigene54293  | Potri.013G040600.1  | 11.3821  | 42.1738  | -1.8896 | Down | 1.61E-53  | 1.69E-52  |
| Unigene28388  | Potri.018G114700.1  | 18.3001  | 67.8125  | -1.8897 | Down | 1.11E-56  | 1.25E-55  |
| Unigene43480  | Potri.014G063000.1  | 7.2386   | 26.8233  | -1.8897 | Down | 1.11E-56  | 1.25E-55  |
| Unigene7733   | Potri.006G199800.6  | 2.9912   | 11.0839  | -1.8897 | Down | 9.19E-25  | 4.77E-24  |
| Unigene92367  | Potri.011G087200.8  | 109.8397 | 407.0565 | -1.8898 | Down | 0         | 0         |
| Unigene10643  | Potri.014G107200.2  | 6.4906   | 24.0552  | -1.8899 | Down | 6.44E-133 | 1.97E-131 |
| Unigene118726 | Potri.009G056500.2  | 1.9467   | 7.2149   | -1.8899 | Down | 2.88E-10  | 8.35E-10  |
| Unigene6217   | Potri.007G126400.1  | 12.1629  | 45.0773  | -1.8899 | Down | 6.15E-28  | 3.52E-27  |
| Unigene46131  | Potri.007G013300.1  | 27.7763  | 102.9425 | -1.8899 | Down | 5.36E-63  | 6.71E-62  |
| Unigene34491  | Potri.006G039000.2  | 2.1241   | 7.8723   | -1.8899 | Down | 3.93E-19  | 1.70E-18  |
| Unigene8927   | Potri.001G013600.1  | 2.7107   | 10.0463  | -1.8899 | Down | 2.88E-10  | 8.35E-10  |
| Unigene76650  | Potri.003G045700.5  | 13.8025  | 51.1609  | -1.8901 | Down | 4.14E-31  | 2.59E-30  |
| Unigene24333  | Potri.006G265900.4  | 5.3076   | 19.6752  | -1.8902 | Down | 8.78E-129 | 2.58E-127 |
| Unigene76455  | Potri.005G226000.1  | 50.1728  | 185.9899 | -1.8902 | Down | 3.70E-108 | 8.71E-107 |
| Unigene12608  | Potri.001G254000.1  | 9.9879   | 37.0239  | -1.8902 | Down | 1.01E-63  | 1.28E-62  |
| Unigene3825   | Potri.001G295200.1  | 10.7395  | 39.812   | -1.8903 | Down | 2.80E-34  | 1.91E-33  |
| Unigene39804  | Potri.013G072000.1  | 2.1458   | 7.9554   | -1.8904 | Down | 1.77E-13  | 6.03E-13  |
| Unigene96138  | Potri.012G009200.1  | 5.4196   | 20.0926  | -1.8904 | Down | 1.77E-13  | 6.03E-13  |
| Unigene83827  | Potri.015G006700.6  | 19.8111  | 73.4521  | -1.8905 | Down | 1.55E-52  | 1.60E-51  |

|               |                    |         |          |         |      |           |           |
|---------------|--------------------|---------|----------|---------|------|-----------|-----------|
| Unigene27186  | Potri.006G170700.1 | 13.4424 | 49.8401  | -1.8905 | Down | 1.30E-40  | 1.04E-39  |
| Unigene51628  | Potri.006G004700.2 | 14.5272 | 53.8623  | -1.8905 | Down | 1.30E-40  | 1.04E-39  |
| Unigene4716   | Potri.017G078500.1 | 28.7889 | 106.7455 | -1.8906 | Down | 1.03E-97  | 2.14E-96  |
| Unigene29497  | Potri.014G070500.1 | 3.1356  | 11.6274  | -1.8907 | Down | 7.75E-32  | 4.96E-31  |
| Unigene23321  | Potri.010G255200.1 | 5.474   | 20.2983  | -1.8907 | Down | 7.75E-32  | 4.96E-31  |
| Unigene53537  | Potri.005G010700.3 | 7.6741  | 28.4565  | -1.8907 | Down | 1.13E-16  | 4.40E-16  |
| Unigene50898  | Potri.001G164800.5 | 5.8112  | 21.5486  | -1.8907 | Down | 1.13E-16  | 4.40E-16  |
| Unigene24874  | Potri.007G057600.2 | 6.8536  | 25.4175  | -1.8909 | Down | 7.30E-20  | 3.24E-19  |
| Unigene78279  | Potri.016G023800.2 | 59.2684 | 219.8267 | -1.891  | Down | 4.00E-133 | 1.23E-131 |
| Unigene49736  | Potri.008G095300.1 | 18.8819 | 70.0323  | -1.891  | Down | 2.88E-87  | 5.21E-86  |
| Unigene18898  | Potri.006G087400.1 | 4.841   | 17.9551  | -1.891  | Down | 4.81E-23  | 2.37E-22  |
| Unigene74995  | Potri.002G238100.1 | 10.437  | 38.7105  | -1.891  | Down | 4.81E-23  | 2.37E-22  |
| Unigene19293  | Potri.003G178800.2 | 13.3504 | 49.5178  | -1.8911 | Down | 1.16E-47  | 1.08E-46  |
| Unigene101184 | Potri.TI07000.3    | 11.681  | 43.3314  | -1.8912 | Down | 1.45E-32  | 9.47E-32  |
| Unigene118407 | Potri.008G132400.1 | 6.7275  | 24.9552  | -1.8912 | Down | 2.15E-29  | 1.28E-28  |
| Unigene27140  | Potri.003G029600.1 | 8.7179  | 32.3384  | -1.8912 | Down | 2.15E-29  | 1.28E-28  |
| Unigene23783  | Potri.010G249600.1 | 4.6988  | 17.431   | -1.8913 | Down | 9.86E-36  | 6.97E-35  |
| Unigene53920  | Potri.001G056100.1 | 6.2758  | 23.2819  | -1.8913 | Down | 6.72E-39  | 5.13E-38  |
| Unigene46763  | Potri.008G108000.1 | 88.0821 | 326.7831 | -1.8914 | Down | 0         | 0         |
| Unigene42825  | Potri.018G074200.1 | 3.634   | 13.483   | -1.8915 | Down | 3.45E-64  | 4.42E-63  |
| Unigene50444  | Potri.006G096800.1 | 0.863   | 3.2024   | -1.8917 | Down | 1.74E-04  | 3.24E-04  |
| Unigene98649  | Potri.002G181900.3 | 1.1616  | 4.3105   | -1.8917 | Down | 1.74E-04  | 3.24E-04  |
| Unigene47450  | Potri.001G091600.1 | 0.8351  | 3.0989   | -1.8917 | Down | 1.74E-04  | 3.24E-04  |
| Unigene96604  | Potri.019G086700.2 | 1.4532  | 5.3928   | -1.8918 | Down | 8.96E-08  | 2.23E-07  |
| Unigene117315 | Potri.018G143800.1 | 0.9456  | 3.5091   | -1.8918 | Down | 1.74E-04  | 3.24E-04  |
| Unigene20966  | Potri.018G093400.1 | 1.3113  | 4.8662   | -1.8918 | Down | 1.74E-04  | 3.24E-04  |
| Unigene13916  | Potri.018G057900.2 | 3.0911  | 11.4709  | -1.8918 | Down | 6.50E-65  | 8.43E-64  |
| Unigene65045  | Potri.017G007200.1 | 4.165   | 15.4558  | -1.8918 | Down | 2.08E-17  | 8.41E-17  |
| Unigene105579 | Potri.016G133700.1 | 2.0012  | 7.4262   | -1.8918 | Down | 3.26E-14  | 1.15E-13  |
| Unigene65393  | Potri.014G194800.1 | 2.5675  | 9.5277   | -1.8918 | Down | 3.26E-14  | 1.15E-13  |
| Unigene8079   | Potri.011G142900.3 | 4.7392  | 17.5869  | -1.8918 | Down | 1.36E-20  | 6.17E-20  |
| Unigene49519  | Potri.010G188500.2 | 0.9564  | 3.5491   | -1.8918 | Down | 1.74E-04  | 3.24E-04  |
| Unigene40678  | Potri.009G089500.1 | 0.9403  | 3.4895   | -1.8918 | Down | 1.74E-04  | 3.24E-04  |
| Unigene36126  | Potri.008G095800.1 | 1.2163  | 4.5136   | -1.8918 | Down | 1.74E-04  | 3.24E-04  |
| Unigene102925 | Potri.007G041000.1 | 1.1536  | 4.2809   | -1.8918 | Down | 1.74E-04  | 3.24E-04  |
| Unigene20570  | Potri.006G077800.1 | 3.8292  | 14.21    | -1.8918 | Down | 1.36E-20  | 6.17E-20  |
| Unigene67322  | Potri.006G015400.1 | 1.8016  | 6.6856   | -1.8918 | Down | 5.26E-11  | 1.59E-10  |
| Unigene29371  | Potri.006G006100.5 | 1.547   | 5.7407   | -1.8918 | Down | 8.96E-08  | 2.23E-07  |
| Unigene6944   | Potri.005G168300.1 | 1.5541  | 5.7673   | -1.8918 | Down | 8.96E-08  | 2.23E-07  |

|               |                    |         |          |         |      |           |           |
|---------------|--------------------|---------|----------|---------|------|-----------|-----------|
| Unigene8507   | Potri.004G048200.1 | 2.3516  | 8.7267   | -1.8918 | Down | 3.26E-14  | 1.15E-13  |
| Unigene119231 | Potri.003G189200.2 | 2.6391  | 9.7936   | -1.8918 | Down | 2.08E-17  | 8.41E-17  |
| Unigene105184 | Potri.002G137300.1 | 1.2433  | 4.6139   | -1.8918 | Down | 1.74E-04  | 3.24E-04  |
| Unigene94971  | Potri.001G132900.1 | 6.1221  | 22.7187  | -1.8918 | Down | 1.36E-20  | 6.17E-20  |
| Unigene20935  | Potri.001G031700.3 | 0.8857  | 3.2869   | -1.8918 | Down | 1.74E-04  | 3.24E-04  |
| Unigene30368  | Potri.001G025600.1 | 1.0556  | 3.9174   | -1.8918 | Down | 1.74E-04  | 3.24E-04  |
| Unigene9344   | Potri.014G088100.1 | 63.7986 | 236.7815 | -1.892  | Down | 0         | 0         |
| Unigene30599  | Potri.004G092900.5 | 26.8794 | 99.7614  | -1.892  | Down | 2.02E-81  | 3.37E-80  |
| Unigene11014  | Potri.T078500.1    | 3.2101  | 11.915   | -1.8921 | Down | 3.67E-56  | 4.06E-55  |
| Unigene72937  | Potri.002G066200.1 | 52.1123 | 193.4274 | -1.8921 | Down | 3.14E-104 | 7.06E-103 |
| Unigene76694  | Potri.012G091900.1 | 37.6282 | 139.6746 | -1.8922 | Down | 3.80E-82  | 6.41E-81  |
| Unigene32680  | Potri.011G109000.1 | 5.2911  | 19.6411  | -1.8922 | Down | 3.47E-37  | 2.54E-36  |
| Unigene32068  | Potri.008G135500.2 | 3.8671  | 14.3546  | -1.8922 | Down | 2.37E-40  | 1.87E-39  |
| Unigene22223  | Potri.017G076000.3 | 9.4282  | 35.0052  | -1.8925 | Down | 6.62E-90  | 1.24E-88  |
| Unigene23721  | Potri.001G415900.2 | 6.3634  | 23.6259  | -1.8925 | Down | 3.03E-70  | 4.27E-69  |
| Unigene45027  | Potri.001G051200.1 | 20.8158 | 77.2853  | -1.8925 | Down | 1.06E-200 | 5.56E-199 |
| Unigene53967  | Potri.017G020600.1 | 6.1616  | 22.8783  | -1.8926 | Down | 2.53E-21  | 1.18E-20  |
| Unigene22557  | Potri.005G156100.3 | 3.16    | 11.7334  | -1.8926 | Down | 2.53E-21  | 1.18E-20  |
| Unigene2510   | Potri.014G110900.1 | 4.1632  | 15.4594  | -1.8927 | Down | 5.71E-71  | 8.14E-70  |
| Unigene8311   | Potri.003G126900.1 | 7.0123  | 26.04    | -1.8928 | Down | 9.56E-35  | 6.58E-34  |
| Unigene26829  | Potri.001G240400.1 | 4.7381  | 17.5946  | -1.8928 | Down | 3.87E-18  | 1.61E-17  |
| Unigene29326  | Potri.003G035900.1 | 1.6125  | 5.9889   | -1.893  | Down | 6.02E-15  | 2.19E-14  |
| Unigene10810  | Potri.017G101100.2 | 31.1873 | 115.8359 | -1.8931 | Down | 0         | 0         |
| Unigene23617  | Potri.013G114200.1 | 4.7243  | 17.5477  | -1.8931 | Down | 1.22E-38  | 9.27E-38  |
| Unigene15794  | Potri.008G107300.1 | 25.9112 | 96.2419  | -1.8931 | Down | 6.36E-89  | 1.18E-87  |
| Unigene77285  | Potri.001G289400.1 | 32.5966 | 121.0798 | -1.8932 | Down | 2.03E-72  | 2.96E-71  |
| Unigene106043 | Potri.018G057100.1 | 1.5171  | 5.6361   | -1.8934 | Down | 9.63E-12  | 3.01E-11  |
| Unigene30986  | Potri.010G122700.1 | 3.512   | 13.0471  | -1.8934 | Down | 9.63E-12  | 3.01E-11  |
| Unigene23122  | Potri.001G167200.1 | 3.8222  | 14.1997  | -1.8934 | Down | 4.71E-22  | 2.24E-21  |
| Unigene16214  | Potri.010G142200.1 | 5.6935  | 21.1542  | -1.8936 | Down | 3.91E-29  | 2.32E-28  |
| Unigene53112  | Potri.017G155300.6 | 8.123   | 30.1836  | -1.8937 | Down | 7.17E-19  | 3.06E-18  |
| Unigene34530  | Potri.013G046300.2 | 8.2096  | 30.506   | -1.8937 | Down | 5.65E-95  | 1.13E-93  |
| Unigene102097 | Potri.012G097700.1 | 2.0285  | 7.5375   | -1.8937 | Down | 7.17E-19  | 3.06E-18  |
| Unigene49082  | Potri.012G008700.1 | 4.5922  | 17.0636  | -1.8937 | Down | 7.17E-19  | 3.06E-18  |
| Unigene13819  | Potri.015G000400.1 | 4.0787  | 15.157   | -1.8938 | Down | 5.83E-26  | 3.14E-25  |
| Unigene35098  | Potri.010G062000.3 | 7.6711  | 28.5077  | -1.8938 | Down | 1.15E-88  | 2.12E-87  |
| Unigene16941  | Potri.006G079300.1 | 6.9262  | 25.7404  | -1.8939 | Down | 4.31E-40  | 3.38E-39  |
| Unigene32795  | Potri.T066500.1    | 1.9946  | 7.4138   | -1.8941 | Down | 1.11E-15  | 4.17E-15  |
| Unigene6196   | Potri.015G013000.1 | 2.3312  | 8.6649   | -1.8941 | Down | 1.61E-08  | 4.22E-08  |

|               |                    |         |          |         |      |           |           |
|---------------|--------------------|---------|----------|---------|------|-----------|-----------|
| Unigene20797  | Potri.014G100200.1 | 2.7835  | 10.3462  | -1.8941 | Down | 1.61E-08  | 4.22E-08  |
| Unigene148    | Potri.008G158800.1 | 3.3688  | 12.5213  | -1.8941 | Down | 4.03E-65  | 5.25E-64  |
| Unigene6931   | Potri.003G043400.1 | 7.1501  | 26.5762  | -1.8941 | Down | 8.77E-23  | 4.27E-22  |
| Unigene37187  | Potri.002G031600.4 | 3.0511  | 11.3406  | -1.8941 | Down | 1.11E-15  | 4.17E-15  |
| Unigene87121  | Potri.006G073200.4 | 36.2201 | 134.6398 | -1.8942 | Down | 4.68E-108 | 1.10E-106 |
| Unigene28418  | Potri.016G018100.9 | 2.0132  | 7.4841   | -1.8943 | Down | 9.27E-34  | 6.22E-33  |
| Unigene72380  | Potri.T120600.1    | 9.2344  | 34.333   | -1.8945 | Down | 1.33E-19  | 5.85E-19  |
| Unigene94775  | Potri.004G104000.2 | 5.7471  | 21.3674  | -1.8945 | Down | 1.33E-19  | 5.85E-19  |
| Unigene22858  | Potri.006G142100.5 | 14.6335 | 54.4085  | -1.8946 | Down | 1.43E-66  | 1.91E-65  |
| Unigene80407  | Potri.002G114200.1 | 12.3329 | 45.8565  | -1.8946 | Down | 1.37E-30  | 8.45E-30  |
| Unigene37647  | Potri.005G167700.1 | 67.2243 | 249.9734 | -1.8947 | Down | 1.27E-168 | 5.31E-167 |
| Unigene9583   | Potri.014G079800.1 | 9.7945  | 36.4269  | -1.895  | Down | 2.04E-27  | 1.15E-26  |
| Unigene39878  | Potri.003G204900.1 | 10.4015 | 38.6863  | -1.895  | Down | 4.29E-57  | 4.83E-56  |
| Unigene43446  | Potri.016G025300.1 | 6.7839  | 25.232   | -1.8951 | Down | 1.72E-101 | 3.76E-100 |
| Unigene2638   | Potri.015G035600.1 | 8.2235  | 30.5872  | -1.8951 | Down | 2.56E-31  | 1.62E-30  |
| Unigene9739   | Potri.003G143000.1 | 3.443   | 12.8063  | -1.8951 | Down | 2.06E-16  | 7.97E-16  |
| Unigene7758   | Potri.001G216000.1 | 3.6475  | 13.5666  | -1.8951 | Down | 2.56E-31  | 1.62E-30  |
| Unigene73705  | Potri.016G055000.2 | 63.3389 | 235.6142 | -1.8953 | Down | 1.25E-128 | 3.66E-127 |
| Unigene22281  | Potri.010G117000.1 | 2.4534  | 9.1274   | -1.8954 | Down | 6.92E-47  | 6.33E-46  |
| Unigene27958  | Potri.005G090800.1 | 15.4774 | 57.585   | -1.8955 | Down | 1.52E-58  | 1.76E-57  |
| Unigene710    | Potri.012G144400.2 | 7.2554  | 26.9967  | -1.8957 | Down | 7.76E-82  | 1.30E-80  |
| Unigene11532  | Potri.006G134000.6 | 28.2063 | 104.9558 | -1.8957 | Down | 1.99E-173 | 8.58E-172 |
| Unigene43265  | Potri.005G118900.1 | 7.003   | 26.0588  | -1.8957 | Down | 1.69E-51  | 1.70E-50  |
| Unigene36165  | Potri.004G001200.2 | 14.4883 | 53.9124  | -1.8957 | Down | 1.69E-51  | 1.70E-50  |
| Unigene13425  | Potri.013G062800.1 | 10.3564 | 38.5405  | -1.8959 | Down | 2.55E-90  | 4.79E-89  |
| Unigene4882   | Potri.002G016900.1 | 34.1772 | 127.1925 | -1.8959 | Down | 1.34E-144 | 4.57E-143 |
| Unigene14611  | Potri.T120300.1    | 3.2693  | 12.1676  | -1.896  | Down | 2.92E-09  | 7.98E-09  |
| Unigene20091  | Potri.018G019100.2 | 1.8607  | 6.9253   | -1.896  | Down | 2.92E-09  | 7.98E-09  |
| Unigene6174   | Potri.017G130000.1 | 1.0232  | 3.8081   | -1.896  | Down | 3.00E-05  | 6.05E-05  |
| Unigene8728   | Potri.016G091200.4 | 1.492   | 5.5529   | -1.896  | Down | 3.00E-05  | 6.05E-05  |
| Unigene119318 | Potri.014G106400.7 | 1.205   | 4.4847   | -1.896  | Down | 2.92E-09  | 7.98E-09  |
| Unigene36897  | Potri.011G167500.1 | 3.7642  | 14.0095  | -1.896  | Down | 2.92E-09  | 7.98E-09  |
| Unigene65692  | Potri.011G164000.3 | 6.2736  | 23.3492  | -1.896  | Down | 4.61E-21  | 2.12E-20  |
| Unigene118068 | Potri.011G125800.1 | 1.0156  | 3.7798   | -1.896  | Down | 3.00E-05  | 6.05E-05  |
| Unigene22591  | Potri.008G186800.1 | 1.5944  | 5.9341   | -1.896  | Down | 3.24E-13  | 1.09E-12  |
| Unigene9297   | Potri.007G024800.1 | 2.9307  | 10.9074  | -1.896  | Down | 2.92E-09  | 7.97E-09  |
| Unigene18354  | Potri.006G111200.3 | 8.0767  | 30.0598  | -1.896  | Down | 8.41E-99  | 1.78E-97  |
| Unigene101809 | Potri.006G105400.1 | 1.159   | 4.3137   | -1.896  | Down | 3.00E-05  | 6.05E-05  |
| Unigene27289  | Potri.003G132600.2 | 7.0069  | 26.0784  | -1.896  | Down | 1.15E-36  | 8.29E-36  |

|               |                    |          |          |         |      |           |           |
|---------------|--------------------|----------|----------|---------|------|-----------|-----------|
| Unigene13011  | Potri.003G094800.1 | 1.0941   | 4.0721   | -1.896  | Down | 2.92E-09  | 7.98E-09  |
| Unigene38078  | Potri.003G019500.2 | 2.5805   | 9.604    | -1.896  | Down | 2.92E-09  | 7.97E-09  |
| Unigene41968  | Potri.002G090600.4 | 1.5903   | 5.9188   | -1.896  | Down | 3.00E-05  | 6.05E-05  |
| Unigene96387  | Potri.001G350700.1 | 0.8702   | 3.2387   | -1.896  | Down | 2.92E-09  | 7.97E-09  |
| Unigene29659  | Potri.001G242600.6 | 3.7573   | 13.9839  | -1.896  | Down | 4.61E-21  | 2.12E-20  |
| Unigene35308  | Potri.001G163600.1 | 2.9465   | 10.9662  | -1.896  | Down | 3.81E-17  | 1.52E-16  |
| Unigene41039  | Potri.001G149200.1 | 1.3452   | 5.0067   | -1.896  | Down | 3.00E-05  | 6.05E-05  |
| Unigene61325  | Potri.001G102900.7 | 4.0623   | 15.1192  | -1.896  | Down | 3.24E-13  | 1.09E-12  |
| Unigene112000 | Potri.001G091600.1 | 1.7239   | 6.4161   | -1.896  | Down | 3.00E-05  | 6.05E-05  |
| Unigene101557 | Potri.005G051100.3 | 1.052    | 3.9155   | -1.8961 | Down | 3.00E-05  | 6.05E-05  |
| Unigene16632  | Potri.006G027700.1 | 18.522   | 68.9479  | -1.8963 | Down | 5.97E-53  | 6.19E-52  |
| Unigene34044  | Potri.002G036600.1 | 12.3779  | 46.079   | -1.8963 | Down | 7.46E-81  | 1.24E-79  |
| Unigene38204  | Potri.015G041800.1 | 19.7386  | 73.4837  | -1.8964 | Down | 5.66E-101 | 1.23E-99  |
| Unigene26169  | Potri.013G128100.1 | 15.069   | 56.0985  | -1.8964 | Down | 2.15E-37  | 1.58E-36  |
| Unigene20151  | Potri.009G014600.1 | 21.5266  | 80.1567  | -1.8967 | Down | 2.01E-78  | 3.23E-77  |
| Unigene43472  | Potri.016G069100.1 | 1.2849   | 4.7858   | -1.8971 | Down | 5.97E-14  | 2.08E-13  |
| Unigene85587  | Potri.004G167700.1 | 13.4586  | 50.1279  | -1.8971 | Down | 7.57E-39  | 5.77E-38  |
| Unigene37318  | Potri.002G042000.1 | 12.3743  | 46.0892  | -1.8971 | Down | 1.98E-26  | 1.08E-25  |
| Unigene74613  | Potri.016G052800.1 | 28.32    | 105.4862 | -1.8972 | Down | 9.78E-60  | 1.16E-58  |
| Unigene17775  | Potri.016G022200.1 | 7.5564   | 28.147   | -1.8972 | Down | 5.92E-35  | 4.10E-34  |
| Unigene45404  | Potri.010G158400.5 | 7.4399   | 27.7127  | -1.8972 | Down | 1.35E-80  | 2.23E-79  |
| Unigene37643  | Potri.004G115900.1 | 8.5051   | 31.6845  | -1.8974 | Down | 4.66E-31  | 2.92E-30  |
| Unigene23188  | Potri.013G134800.1 | 1.1581   | 4.3148   | -1.8975 | Down | 5.30E-10  | 1.51E-09  |
| Unigene96792  | Potri.015G138200.1 | 0.8534   | 3.1796   | -1.8976 | Down | 5.30E-10  | 1.51E-09  |
| Unigene27839  | Potri.010G005300.2 | 3.7613   | 14.0142  | -1.8976 | Down | 1.31E-18  | 5.53E-18  |
| Unigene100862 | Potri.009G096600.1 | 4.3668   | 16.2701  | -1.8976 | Down | 5.30E-10  | 1.52E-09  |
| Unigene67581  | Potri.006G136200.1 | 3.0243   | 11.2681  | -1.8976 | Down | 5.30E-10  | 1.51E-09  |
| Unigene6854   | Potri.004G089100.1 | 1.9251   | 7.1728   | -1.8976 | Down | 5.30E-10  | 1.51E-09  |
| Unigene45806  | Potri.004G079200.1 | 1.1841   | 4.4119   | -1.8976 | Down | 5.30E-10  | 1.51E-09  |
| Unigene24775  | Potri.002G160200.1 | 21.923   | 81.6826  | -1.8976 | Down | 1.08E-52  | 1.12E-51  |
| Unigene43285  | Potri.012G092400.1 | 3.2752   | 12.2039  | -1.8977 | Down | 2.66E-57  | 3.00E-56  |
| Unigene90740  | Potri.004G059000.2 | 112.8502 | 420.5095 | -1.8977 | Down | 0         | 0         |
| Unigene12664  | Potri.006G108300.1 | 6.7817   | 25.273   | -1.8979 | Down | 6.45E-45  | 5.65E-44  |
| Unigene34324  | Potri.003G164300.2 | 4.5204   | 16.8459  | -1.8979 | Down | 1.61E-66  | 2.15E-65  |
| Unigene5464   | Potri.010G254200.1 | 6.8775   | 25.6331  | -1.8981 | Down | 5.01E-41  | 4.03E-40  |
| Unigene44295  | Potri.010G227100.1 | 2.5092   | 9.3522   | -1.8981 | Down | 1.10E-14  | 3.96E-14  |
| Unigene2098   | Potri.019G030400.2 | 12.8598  | 47.9333  | -1.8982 | Down | 1.86E-76  | 2.90E-75  |
| Unigene108283 | Potri.016G090800.2 | 15.7527  | 58.7172  | -1.8982 | Down | 1.64E-32  | 1.06E-31  |
| Unigene40199  | Potri.004G186500.2 | 26.4022  | 98.4144  | -1.8982 | Down | 1.65E-129 | 4.86E-128 |

|               |                    |         |          |         |      |           |           |
|---------------|--------------------|---------|----------|---------|------|-----------|-----------|
| Unigene11741  | Potri.002G161700.1 | 3.4267  | 12.7727  | -1.8982 | Down | 1.64E-32  | 1.06E-31  |
| Unigene35115  | Potri.008G005200.1 | 19.0981 | 71.1935  | -1.8983 | Down | 3.51E-77  | 5.52E-76  |
| Unigene48327  | Potri.005G125700.2 | 17.2233 | 64.2053  | -1.8983 | Down | 3.71E-117 | 9.70E-116 |
| Unigene79486  | Potri.016G022400.2 | 85.3882 | 318.3266 | -1.8984 | Down | 9.24E-198 | 4.74E-196 |
| Unigene11197  | Potri.009G051500.1 | 12.1579 | 45.3257  | -1.8984 | Down | 1.35E-95  | 2.72E-94  |
| Unigene18691  | Potri.006G112100.3 | 9.4929  | 35.3883  | -1.8984 | Down | 9.41E-42  | 7.69E-41  |
| Unigene43688  | Potri.001G056100.1 | 4.2647  | 15.899   | -1.8984 | Down | 5.55E-24  | 2.81E-23  |
| Unigene43089  | Potri.018G116100.1 | 9.4867  | 35.3755  | -1.8988 | Down | 3.01E-152 | 1.10E-150 |
| Unigene34900  | Potri.006G180300.1 | 4.131   | 15.4043  | -1.8988 | Down | 9.49E-75  | 1.44E-73  |
| Unigene46670  | Potri.019G104400.1 | 2.3769  | 8.8644   | -1.8989 | Down | 5.25E-06  | 1.14E-05  |
| Unigene50245  | Potri.018G052200.1 | 10.4118 | 38.8293  | -1.8989 | Down | 2.92E-66  | 3.88E-65  |
| Unigene14335  | Potri.017G015200.1 | 1.0317  | 3.8475   | -1.8989 | Down | 5.25E-06  | 1.14E-05  |
| Unigene37755  | Potri.012G058100.3 | 1.6163  | 6.0278   | -1.8989 | Down | 5.25E-06  | 1.14E-05  |
| Unigene42665  | Potri.007G067100.2 | 8.3602  | 31.1782  | -1.8989 | Down | 6.74E-140 | 2.20E-138 |
| Unigene2982   | Potri.005G249800.1 | 8.4386  | 31.4703  | -1.8989 | Down | 1.18E-61  | 1.45E-60  |
| Unigene15803  | Potri.004G074700.1 | 1.9711  | 7.351    | -1.8989 | Down | 5.25E-06  | 1.14E-05  |
| Unigene108678 | Potri.003G166900.1 | 9.2803  | 34.6093  | -1.8989 | Down | 4.52E-20  | 2.01E-19  |
| Unigene38809  | Potri.002G084300.2 | 1.8229  | 6.7982   | -1.8989 | Down | 5.25E-06  | 1.14E-05  |
| Unigene113893 | Potri.001G103800.2 | 1.8578  | 6.9285   | -1.8989 | Down | 5.25E-06  | 1.14E-05  |
| Unigene34208  | Potri.001G084900.1 | 3.5687  | 13.3088  | -1.8989 | Down | 1.38E-38  | 1.04E-37  |
| Unigene35407  | Potri.004G175600.1 | 1.3736  | 5.1228   | -1.899  | Down | 5.25E-06  | 1.14E-05  |
| Unigene44853  | Potri.001G369900.1 | 4.4708  | 16.675   | -1.8991 | Down | 3.38E-76  | 5.23E-75  |
| Unigene39593  | Potri.008G222000.1 | 5.5106  | 20.5564  | -1.8993 | Down | 3.42E-115 | 8.75E-114 |
| Unigene42886  | Potri.002G221300.1 | 5.0834  | 18.963   | -1.8993 | Down | 7.88E-172 | 3.37E-170 |
| Unigene9682   | Potri.018G030300.1 | 14.8592 | 55.4316  | -1.8994 | Down | 6.96E-54  | 7.36E-53  |
| Unigene40207  | Potri.006G153800.1 | 4.6624  | 17.3936  | -1.8994 | Down | 1.93E-25  | 1.02E-24  |
| Unigene81642  | Potri.014G147700.2 | 96.3086 | 359.3122 | -1.8995 | Down | 6.26E-236 | 3.98E-234 |
| Unigene106818 | Potri.014G102000.1 | 2.3285  | 8.6874   | -1.8995 | Down | 8.40E-21  | 3.84E-20  |
| Unigene53422  | Potri.009G054000.1 | 11.3938 | 42.511   | -1.8996 | Down | 2.02E-35  | 1.41E-34  |
| Unigene37048  | Potri.007G017600.3 | 17.672  | 65.9349  | -1.8996 | Down | 2.64E-88  | 4.84E-87  |
| Unigene550    | Potri.001G177000.1 | 40.3363 | 150.4989 | -1.8996 | Down | 2.88E-218 | 1.66E-216 |
| Unigene33676  | Potri.010G087400.1 | 11.6028 | 43.2927  | -1.8997 | Down | 1.49E-64  | 1.92E-63  |
| Unigene26353  | Potri.015G050800.1 | 9.8232  | 36.6575  | -1.8998 | Down | 3.61E-26  | 1.96E-25  |
| Unigene41291  | Potri.011G152700.3 | 8.1086  | 30.258   | -1.8998 | Down | 9.10E-41  | 7.26E-40  |
| Unigene7420   | Potri.001G205800.4 | 17.7576 | 66.2736  | -1.9    | Down | 6.12E-76  | 9.45E-75  |
| Unigene46460  | Potri.009G081100.2 | 4.5907  | 17.1339  | -1.9001 | Down | 1.56E-21  | 7.32E-21  |
| Unigene94529  | Potri.005G090800.1 | 9.9941  | 37.3011  | -1.9001 | Down | 1.56E-21  | 7.32E-21  |
| Unigene31555  | Potri.005G014900.1 | 1.6067  | 5.9969   | -1.9001 | Down | 1.77E-11  | 5.46E-11  |
| Unigene28638  | Potri.007G065300.2 | 8.7561  | 32.683   | -1.9002 | Down | 7.78E-47  | 7.11E-46  |



|               |                    |         |          |         |      |           |           |
|---------------|--------------------|---------|----------|---------|------|-----------|-----------|
| Unigene5625   | Potri.005G040300.1 | 11.5645 | 43.1684  | -1.9003 | Down | 6.74E-27  | 3.74E-26  |
| Unigene56537  | Potri.004G040000.4 | 11.0345 | 41.1898  | -1.9003 | Down | 6.74E-27  | 3.74E-26  |
| Unigene13579  | Potri.010G054800.1 | 3.4125  | 12.7396  | -1.9004 | Down | 2.97E-32  | 1.92E-31  |
| Unigene33655  | Potri.004G176300.1 | 8.3246  | 31.0775  | -1.9004 | Down | 1.46E-47  | 1.36E-46  |
| Unigene93134  | Potri.014G089200.1 | 53.1362 | 198.3817 | -1.9005 | Down | 4.11E-273 | 3.18E-271 |
| Unigene3264   | Potri.010G244700.2 | 6.3718  | 23.7914  | -1.9007 | Down | 1.46E-79  | 2.38E-78  |
| Unigene10793  | Potri.004G111500.1 | 6.9969  | 26.1287  | -1.9008 | Down | 5.90E-196 | 3.00E-194 |
| Unigene10682  | Potri.003G038600.1 | 12.5569 | 46.8906  | -1.9008 | Down | 7.14E-206 | 3.84E-204 |
| Unigene50297  | Potri.008G064400.1 | 8.479   | 31.6651  | -1.9009 | Down | 1.11E-75  | 1.70E-74  |
| Unigene46188  | Potri.018G087700.1 | 4.3372  | 16.1987  | -1.901  | Down | 2.36E-28  | 1.36E-27  |
| Unigene36932  | Potri.005G109500.1 | 1.2862  | 4.8037   | -1.901  | Down | 9.29E-07  | 2.14E-06  |
| Unigene117989 | Potri.005G094400.3 | 1.4058  | 5.2503   | -1.901  | Down | 9.29E-07  | 2.15E-06  |
| Unigene46124  | Potri.002G033800.1 | 3.7804  | 14.1191  | -1.901  | Down | 3.24E-12  | 1.04E-11  |
| Unigene20492  | Potri.013G026800.1 | 1.1257  | 4.2045   | -1.9011 | Down | 9.29E-07  | 2.15E-06  |
| Unigene19509  | Potri.004G197700.1 | 12.9114 | 48.2222  | -1.9011 | Down | 1.04E-33  | 7.00E-33  |
| Unigene3465   | Potri.002G086500.1 | 2.3312  | 8.7068   | -1.9011 | Down | 9.29E-07  | 2.14E-06  |
| Unigene52252  | Potri.011G115100.2 | 27.9378 | 104.3545 | -1.9012 | Down | 1.95E-136 | 6.16E-135 |
| Unigene3154   | Potri.005G129500.1 | 10.5578 | 39.4369  | -1.9012 | Down | 8.42E-56  | 9.27E-55  |
| Unigene1782   | Potri.006G106500.2 | 8.3147  | 31.0598  | -1.9013 | Down | 8.80E-40  | 6.87E-39  |
| Unigene34533  | Potri.008G125900.1 | 5.8659  | 21.913   | -1.9014 | Down | 1.96E-34  | 1.33E-33  |
| Unigene28693  | Potri.002G112100.4 | 61.5015 | 229.7612 | -1.9014 | Down | 0         | 0         |
| Unigene386    | Potri.012G092400.1 | 1.5872  | 5.9299   | -1.9015 | Down | 1.01E-23  | 5.08E-23  |
| Unigene59282  | Potri.010G245200.1 | 2.5525  | 9.5362   | -1.9015 | Down | 1.01E-23  | 5.08E-23  |
| Unigene21751  | Potri.009G040500.3 | 4.0343  | 15.0726  | -1.9015 | Down | 1.38E-62  | 1.72E-61  |
| Unigene12895  | Potri.008G092800.1 | 11.1989 | 41.8393  | -1.9015 | Down | 5.83E-90  | 1.09E-88  |
| Unigene70374  | Potri.006G005100.1 | 2.652   | 9.908    | -1.9015 | Down | 1.01E-23  | 5.08E-23  |
| Unigene17421  | Potri.015G017500.1 | 2.8739  | 10.738   | -1.9016 | Down | 2.39E-18  | 1.00E-17  |
| Unigene85152  | Potri.005G229200.1 | 18.3889 | 68.7083  | -1.9016 | Down | 6.48E-52  | 6.58E-51  |
| Unigene32232  | Potri.002G048000.1 | 7.6637  | 28.6347  | -1.9017 | Down | 1.21E-68  | 1.67E-67  |
| Unigene4023   | Potri.006G214900.1 | 6.6069  | 24.6878  | -1.9018 | Down | 8.24E-30  | 4.98E-29  |
| Unigene70340  | Potri.001G306500.3 | 5.5799  | 20.8508  | -1.9018 | Down | 3.10E-41  | 2.51E-40  |
| Unigene3835   | Potri.012G071600.2 | 3.4597  | 12.9292  | -1.9019 | Down | 5.94E-13  | 1.97E-12  |
| Unigene5110   | Potri.008G129600.1 | 8.5869  | 32.0903  | -1.9019 | Down | 1.89E-24  | 9.71E-24  |
| Unigene18734  | Potri.006G132100.1 | 5.9799  | 22.3475  | -1.9019 | Down | 1.06E-58  | 1.23E-57  |
| Unigene8076   | Potri.005G247200.1 | 1.6441  | 6.144    | -1.9019 | Down | 5.94E-13  | 1.97E-12  |
| Unigene94604  | Potri.002G027100.1 | 3.0294  | 11.3212  | -1.9019 | Down | 5.94E-13  | 1.97E-12  |
| Unigene12998  | Potri.001G190200.1 | 9.2169  | 34.4445  | -1.9019 | Down | 4.31E-70  | 6.06E-69  |
| Unigene22909  | Potri.008G197000.1 | 6.3606  | 23.7727  | -1.9021 | Down | 1.54E-30  | 9.50E-30  |
| Unigene31788  | Potri.002G143000.1 | 3.0456  | 11.3831  | -1.9021 | Down | 1.54E-30  | 9.50E-30  |

|              |                    |         |          |         |      |           |           |
|--------------|--------------------|---------|----------|---------|------|-----------|-----------|
| Unigene21854 | Potri.011G146300.1 | 2.7567  | 10.3046  | -1.9023 | Down | 1.09E-42  | 9.13E-42  |
| Unigene88658 | Potri.001G144800.1 | 7.2833  | 27.2261  | -1.9023 | Down | 3.52E-25  | 1.85E-24  |
| Unigene20900 | Potri.004G235200.3 | 19.0171 | 71.0935  | -1.9024 | Down | 1.35E-167 | 5.60E-166 |
| Unigene45749 | Potri.016G070200.1 | 47.605  | 177.9749 | -1.9025 | Down | 5.45E-222 | 3.20E-220 |
| Unigene32868 | Potri.009G124500.1 | 10.3812 | 38.8117  | -1.9025 | Down | 2.98E-103 | 6.62E-102 |
| Unigene99706 | Potri.006G270600.2 | 1.2289  | 4.5948   | -1.9026 | Down | 1.66E-07  | 4.04E-07  |
| Unigene44904 | Potri.014G153500.1 | 7.2884  | 27.252   | -1.9027 | Down | 4.54E-38  | 3.40E-37  |
| Unigene29590 | Potri.005G238000.1 | 2.4141  | 9.0264   | -1.9027 | Down | 8.24E-20  | 3.64E-19  |
| Unigene52087 | Potri.004G174900.4 | 14.7463 | 55.1378  | -1.9027 | Down | 2.51E-62  | 3.10E-61  |
| Unigene13463 | Potri.004G081700.1 | 4.473   | 16.7272  | -1.9029 | Down | 7.26E-45  | 6.34E-44  |
| Unigene11843 | Potri.001G459900.1 | 2.967   | 11.0966  | -1.903  | Down | 1.23E-26  | 6.75E-26  |
| Unigene13051 | Potri.013G119700.3 | 8.9292  | 33.3965  | -1.9031 | Down | 2.55E-108 | 6.03E-107 |
| Unigene14971 | Potri.001G398700.1 | 26.0203 | 97.3348  | -1.9033 | Down | 7.69E-85  | 1.35E-83  |
| Unigene51554 | Potri.013G080700.1 | 5.9679  | 22.3251  | -1.9034 | Down | 2.01E-14  | 7.16E-14  |
| Unigene28916 | Potri.012G011100.1 | 19.4069 | 72.5996  | -1.9034 | Down | 2.70E-175 | 1.18E-173 |
| Unigene4573  | Potri.003G196200.3 | 41.5942 | 155.5999 | -1.9034 | Down | 4.16E-188 | 2.01E-186 |
| Unigene19726 | Potri.002G008400.1 | 1.5614  | 5.8409   | -1.9034 | Down | 2.01E-14  | 7.16E-14  |
| Unigene5024  | Potri.001G085400.1 | 3.543   | 13.2537  | -1.9034 | Down | 2.01E-14  | 7.16E-14  |
| Unigene42363 | Potri.008G129600.1 | 7.1232  | 26.6506  | -1.9036 | Down | 2.85E-21  | 1.32E-20  |
| Unigene19494 | Potri.017G070500.1 | 1.607   | 6.0141   | -1.904  | Down | 2.98E-08  | 7.66E-08  |
| Unigene7732  | Potri.015G079000.1 | 5.9805  | 22.3816  | -1.904  | Down | 1.41E-69  | 1.98E-68  |
| Unigene21931 | Potri.011G148800.1 | 9.66    | 36.1517  | -1.904  | Down | 2.35E-76  | 3.65E-75  |
| Unigene30397 | Potri.009G076200.3 | 1.1073  | 4.1441   | -1.904  | Down | 2.98E-08  | 7.66E-08  |
| Unigene42684 | Potri.010G159700.1 | 9.1331  | 34.1854  | -1.9042 | Down | 1.92E-133 | 5.92E-132 |
| Unigene93898 | Potri.005G140700.4 | 4.323   | 16.1816  | -1.9042 | Down | 1.50E-29  | 8.98E-29  |
| Unigene18786 | Potri.004G187800.1 | 6.9047  | 25.8443  | -1.9042 | Down | 2.34E-36  | 1.68E-35  |
| Unigene2047  | Potri.002G188700.4 | 20.0905 | 75.1964  | -1.9042 | Down | 2.33E-91  | 4.44E-90  |
| Unigene1617  | Potri.002G043500.1 | 5.106   | 19.1136  | -1.9043 | Down | 7.01E-44  | 6.00E-43  |
| Unigene13894 | Potri.001G300100.1 | 6.6153  | 24.7634  | -1.9043 | Down | 5.73E-65  | 7.43E-64  |
| Unigene11045 | Potri.013G158500.1 | 6.8864  | 25.7821  | -1.9045 | Down | 1.61E-123 | 4.49E-122 |
| Unigene26999 | Potri.004G211300.3 | 4.6918  | 17.5652  | -1.9045 | Down | 6.86E-16  | 2.60E-15  |
| Unigene29230 | Potri.008G068400.1 | 13.0227 | 48.7592  | -1.9046 | Down | 1.23E-59  | 1.46E-58  |
| Unigene46445 | Potri.008G129600.1 | 14.2259 | 53.2688  | -1.9048 | Down | 5.25E-31  | 3.28E-30  |
| Unigene94386 | Potri.004G236900.1 | 5.5528  | 20.794   | -1.9049 | Down | 1.42E-53  | 1.49E-52  |
| Unigene24484 | Potri.018G146900.1 | 2.2487  | 8.4216   | -1.905  | Down | 3.43E-24  | 1.75E-23  |
| Unigene95870 | Potri.017G064900.1 | 1.6809  | 6.2951   | -1.905  | Down | 5.38E-09  | 1.45E-08  |
| Unigene66976 | Potri.017G032000.3 | 3.3332  | 12.4831  | -1.905  | Down | 5.38E-09  | 1.45E-08  |
| Unigene21410 | Potri.016G103500.1 | 6.3871  | 23.9205  | -1.905  | Down | 2.52E-84  | 4.40E-83  |
| Unigene3661  | Potri.009G040200.1 | 2.701   | 10.1156  | -1.905  | Down | 5.38E-09  | 1.45E-08  |

|               |                    |          |          |         |      |          |          |
|---------------|--------------------|----------|----------|---------|------|----------|----------|
| Unigene78322  | Potri.006G184200.1 | 3.319    | 12.4302  | -1.905  | Down | 5.38E-09 | 1.45E-08 |
| Unigene36745  | Potri.004G119000.2 | 3.73     | 13.9691  | -1.905  | Down | 1.27E-16 | 4.96E-16 |
| Unigene3832   | Potri.001G359900.1 | 12.6746  | 47.468   | -1.905  | Down | 2.90E-39 | 2.24E-38 |
| Unigene49266  | Potri.002G119300.1 | 6.7912   | 25.4394  | -1.9053 | Down | 6.40E-25 | 3.34E-24 |
| Unigene43963  | Potri.010G219600.1 | 5.8824   | 22.037   | -1.9055 | Down | 3.45E-33 | 2.28E-32 |
| Unigene72295  | Potri.001G326700.2 | 7.9669   | 29.8463  | -1.9055 | Down | 2.35E-17 | 9.46E-17 |
| Unigene50276  | Potri.011G128800.1 | 4.3654   | 16.3563  | -1.9057 | Down | 6.46E-34 | 4.35E-33 |
| Unigene20201  | Potri.018G152400.3 | 2.1341   | 7.9971   | -1.9058 | Down | 9.76E-10 | 2.74E-09 |
| Unigene44582  | Potri.005G125100.1 | 1.1333   | 4.2468   | -1.9058 | Down | 9.76E-10 | 2.74E-09 |
| Unigene19436  | Potri.002G255500.1 | 1.1363   | 4.258    | -1.9058 | Down | 9.76E-10 | 2.74E-09 |
| Unigene102865 | Potri.016G026500.2 | 2.1027   | 7.8795   | -1.9059 | Down | 9.76E-10 | 2.74E-09 |
| Unigene52590  | Potri.009G137200.2 | 25.5134  | 95.6079  | -1.9059 | Down | 1.31E-67 | 1.77E-66 |
| Unigene3214   | Potri.008G016000.2 | 5.0316   | 18.8552  | -1.9059 | Down | 4.36E-18 | 1.81E-17 |
| Unigene20911  | Potri.005G184500.3 | 2.8983   | 10.8609  | -1.9059 | Down | 9.76E-10 | 2.74E-09 |
| Unigene55963  | Potri.005G114300.1 | 1.2616   | 4.7277   | -1.9059 | Down | 9.76E-10 | 2.74E-09 |
| Unigene53109  | Potri.005G112900.6 | 3.8299   | 14.3519  | -1.9059 | Down | 9.76E-10 | 2.74E-09 |
| Unigene99948  | Potri.003G148700.2 | 2.9944   | 11.221   | -1.9059 | Down | 4.36E-18 | 1.81E-17 |
| Unigene21174  | Potri.001G216400.1 | 2.9582   | 11.0856  | -1.9059 | Down | 9.76E-10 | 2.74E-09 |
| Unigene23376  | Potri.004G193500.2 | 4.8861   | 18.3132  | -1.9061 | Down | 4.17E-27 | 2.33E-26 |
| Unigene18443  | Potri.004G134400.1 | 8.0129   | 30.0325  | -1.9061 | Down | 1.37E-52 | 1.41E-51 |
| Unigene31643  | Potri.017G111300.3 | 13.6574  | 51.1898  | -1.9062 | Down | 2.39E-44 | 2.06E-43 |
| Unigene13676  | Potri.016G092600.1 | 2.0916   | 7.8399   | -1.9062 | Down | 8.09E-19 | 3.44E-18 |
| Unigene35945  | Potri.008G041900.1 | 23.0818  | 86.5164  | -1.9062 | Down | 6.53E-96 | 1.32E-94 |
| Unigene16510  | Potri.001G367400.3 | 20.1757  | 75.6213  | -1.9062 | Down | 2.39E-44 | 2.06E-43 |
| Unigene82570  | Potri.001G161700.3 | 164.5736 | 616.8889 | -1.9063 | Down | 0        | 0        |
| Unigene49057  | Potri.015G134900.2 | 5.5911   | 20.959   | -1.9064 | Down | 7.79E-28 | 4.44E-27 |
| Unigene27653  | Potri.002G026700.2 | 24.6658  | 92.4692  | -1.9065 | Down | 7.35E-90 | 1.37E-88 |
| Unigene107162 | Potri.018G066300.2 | 2.6605   | 9.9746   | -1.9066 | Down | 1.50E-19 | 6.58E-19 |
| Unigene4131   | Potri.014G174200.1 | 11.2348  | 42.1218  | -1.9066 | Down | 1.46E-28 | 8.48E-28 |
| Unigene42220  | Potri.008G073100.1 | 19.5798  | 73.4092  | -1.9066 | Down | 2.09E-73 | 3.09E-72 |
| Unigene2244   | Potri.007G011700.1 | 1.2063   | 4.5228   | -1.9066 | Down | 1.78E-10 | 5.20E-10 |
| Unigene27340  | Potri.002G130100.1 | 10.2154  | 38.3027  | -1.9067 | Down | 3.23E-56 | 3.58E-55 |
| Unigene18214  | Potri.001G279100.5 | 4.4322   | 16.6198  | -1.9068 | Down | 2.72E-29 | 1.62E-28 |
| Unigene824    | Potri.006G106600.1 | 4.656    | 17.4598  | -1.9069 | Down | 1.26E-66 | 1.68E-65 |
| Unigene14033  | Potri.005G129500.3 | 13.5791  | 50.926   | -1.907  | Down | 5.10E-30 | 3.09E-29 |
| Unigene8542   | Potri.006G113700.1 | 16.4406  | 61.6616  | -1.9071 | Down | 4.06E-59 | 4.75E-58 |
| Unigene17343  | Potri.017G120500.1 | 2.1157   | 7.9357   | -1.9072 | Down | 3.24E-11 | 9.89E-11 |
| Unigene106929 | Potri.016G104700.1 | 2.2134   | 8.302    | -1.9072 | Down | 3.24E-11 | 9.89E-11 |
| Unigene40176  | Potri.013G066200.1 | 1.1303   | 4.2395   | -1.9072 | Down | 3.24E-11 | 9.89E-11 |

|               |                    |         |         |         |      |           |           |
|---------------|--------------------|---------|---------|---------|------|-----------|-----------|
| Unigene5331   | Potri.006G247000.1 | 2.4503  | 9.1908  | -1.9072 | Down | 3.24E-11  | 9.89E-11  |
| Unigene43969  | Potri.006G208900.2 | 9.8346  | 36.8903 | -1.9073 | Down | 1.44E-60  | 1.73E-59  |
| Unigene11243  | Potri.016G013300.1 | 3.4021  | 12.762  | -1.9074 | Down | 3.48E-41  | 2.81E-40  |
| Unigene31541  | Potri.015G028300.1 | 7.9585  | 29.8548 | -1.9074 | Down | 1.79E-31  | 1.13E-30  |
| Unigene38989  | Potri.012G088500.2 | 5.585   | 20.9522 | -1.9075 | Down | 9.66E-22  | 4.55E-21  |
| Unigene40546  | Potri.012G057500.1 | 10.879  | 40.8131 | -1.9075 | Down | 6.54E-42  | 5.37E-41  |
| Unigene21312  | Potri.004G158000.1 | 15.1952 | 57.0063 | -1.9075 | Down | 3.46E-223 | 2.04E-221 |
| Unigene22011  | Potri.017G006800.1 | 9.084   | 34.0808 | -1.9076 | Down | 9.89E-144 | 3.33E-142 |
| Unigene44824  | Potri.010G068400.2 | 5.4539  | 20.4641 | -1.9077 | Down | 6.26E-33  | 4.12E-32  |
| Unigene111936 | Potri.009G088900.3 | 27.3845 | 102.752 | -1.9077 | Down | 3.41E-64  | 4.37E-63  |
| Unigene12448  | Potri.003G160500.4 | 8.8663  | 33.2681 | -1.9077 | Down | 6.26E-33  | 4.12E-32  |
| Unigene108228 | Potri.002G082300.2 | 5.2509  | 19.7025 | -1.9077 | Down | 5.93E-12  | 1.88E-11  |
| Unigene22515  | Potri.016G043100.1 | 1.7418  | 6.5358  | -1.9078 | Down | 5.93E-12  | 1.88E-11  |
| Unigene13008  | Potri.008G065200.3 | 1.2954  | 4.8607  | -1.9078 | Down | 5.93E-12  | 1.88E-11  |
| Unigene33371  | Potri.011G133900.1 | 4.1968  | 15.7489 | -1.9079 | Down | 1.17E-33  | 7.85E-33  |
| Unigene3269   | Potri.008G200800.3 | 3.2109  | 12.0498 | -1.908  | Down | 3.35E-23  | 1.66E-22  |
| Unigene6492   | Potri.018G024800.2 | 10.5878 | 39.7379 | -1.9081 | Down | 1.10E-56  | 1.23E-55  |
| Unigene12222  | Potri.013G112500.5 | 14.4908 | 54.3881 | -1.9082 | Down | 3.45E-101 | 7.50E-100 |
| Unigene6035   | Potri.002G020600.1 | 2.4813  | 9.3133  | -1.9082 | Down | 1.09E-12  | 3.57E-12  |
| Unigene30991  | Potri.010G019100.1 | 11.1429 | 41.828  | -1.9083 | Down | 7.72E-36  | 5.48E-35  |
| Unigene33398  | Potri.014G140900.1 | 24.6143 | 92.4079 | -1.9085 | Down | 5.58E-107 | 1.30E-105 |
| Unigene27738  | Potri.011G147500.2 | 11.8267 | 44.3998 | -1.9085 | Down | 1.91E-48  | 1.81E-47  |
| Unigene9179   | Potri.T034400.2    | 3.799   | 14.2633 | -1.9086 | Down | 2.00E-13  | 6.79E-13  |
| Unigene43073  | Potri.018G085200.1 | 7.2061  | 27.0567 | -1.9087 | Down | 7.09E-110 | 1.71E-108 |
| Unigene18106  | Potri.009G003100.1 | 11.3917 | 42.7745 | -1.9088 | Down | 6.50E-87  | 1.17E-85  |
| Unigene51446  | Potri.006G218900.1 | 18.7186 | 70.287  | -1.9088 | Down | 1.75E-99  | 3.75E-98  |
| Unigene34511  | Potri.010G244400.1 | 9.5552  | 35.8836 | -1.909  | Down | 2.23E-102 | 4.91E-101 |
| Unigene63804  | Potri.001G357100.3 | 2.7311  | 10.2565 | -1.909  | Down | 3.68E-14  | 1.29E-13  |
| Unigene22733  | Potri.019G076900.3 | 3.717   | 13.9605 | -1.9091 | Down | 1.59E-53  | 1.67E-52  |
| Unigene10230  | Potri.012G073700.1 | 25.101  | 94.271  | -1.9091 | Down | 1.09E-78  | 1.76E-77  |
| Unigene24102  | Potri.004G015100.1 | 4.0002  | 15.0258 | -1.9093 | Down | 6.79E-15  | 2.46E-14  |
| Unigene32857  | Potri.011G087500.2 | 18.3899 | 69.0858 | -1.9095 | Down | 4.33E-167 | 1.79E-165 |
| Unigene107047 | Potri.010G076700.5 | 1.4738  | 5.5372  | -1.9096 | Down | 1.25E-15  | 4.69E-15  |
| Unigene23278  | Potri.002G027900.1 | 10.9375 | 41.0916 | -1.9096 | Down | 7.87E-44  | 6.73E-43  |
| Unigene1059   | Potri.001G252100.1 | 1.8344  | 6.8918  | -1.9096 | Down | 1.25E-15  | 4.69E-15  |
| Unigene34002  | Potri.018G027700.1 | 19.0432 | 71.5534 | -1.9097 | Down | 7.91E-89  | 1.46E-87  |
| Unigene4910   | Potri.007G119300.1 | 11.0928 | 41.6791 | -1.9097 | Down | 1.73E-30  | 1.07E-29  |
| Unigene36508  | Potri.012G017700.3 | 3.8913  | 14.6221 | -1.9098 | Down | 2.32E-16  | 8.96E-16  |
| Unigene24126  | Potri.005G118800.1 | 12.1902 | 45.8092 | -1.9099 | Down | 4.17E-152 | 1.52E-150 |

|              |                    |         |          |         |      |           |           |
|--------------|--------------------|---------|----------|---------|------|-----------|-----------|
| Unigene1679  | Potri.014G033900.1 | 2.5139  | 9.4479   | -1.9101 | Down | 4.29E-17  | 1.71E-16  |
| Unigene52664 | Potri.009G075700.1 | 13.0397 | 49.0063  | -1.9101 | Down | 1.14E-32  | 7.44E-32  |
| Unigene22043 | Potri.010G219700.1 | 12.6834 | 47.6774  | -1.9104 | Down | 2.54E-117 | 6.64E-116 |
| Unigene91423 | Potri.002G068600.1 | 28.6851 | 107.8303 | -1.9104 | Down | 4.79E-118 | 1.26E-116 |
| Unigene78205 | Potri.005G045600.6 | 22.3797 | 84.1324  | -1.9105 | Down | 1.54E-52  | 1.58E-51  |
| Unigene66937 | Potri.018G039800.1 | 5.9584  | 22.4036  | -1.9107 | Down | 9.25E-38  | 6.88E-37  |
| Unigene44687 | Potri.007G036700.1 | 13.2121 | 49.6747  | -1.9107 | Down | 1.02E-54  | 1.10E-53  |
| Unigene1649  | Potri.005G020800.3 | 10.8973 | 40.9732  | -1.9107 | Down | 1.92E-55  | 2.10E-54  |
| Unigene17065 | Potri.004G001200.3 | 7.3107  | 27.4867  | -1.9107 | Down | 2.74E-19  | 1.19E-18  |
| Unigene37336 | Potri.008G111100.1 | 7.4893  | 28.1613  | -1.9108 | Down | 5.08E-20  | 2.26E-19  |
| Unigene34369 | Potri.002G160900.4 | 4.0302  | 15.1546  | -1.9108 | Down | 1.74E-38  | 1.31E-37  |
| Unigene31799 | Potri.004G228700.2 | 3.4424  | 12.9451  | -1.9109 | Down | 8.21E-96  | 1.66E-94  |
| Unigene22274 | Potri.002G085000.5 | 12.5846 | 47.3314  | -1.9111 | Down | 1.32E-101 | 2.89E-100 |
| Unigene23900 | Potri.005G069000.1 | 5.9721  | 22.4631  | -1.9112 | Down | 7.60E-43  | 6.36E-42  |
| Unigene41478 | Potri.004G041200.1 | 7.2391  | 27.2308  | -1.9114 | Down | 6.10E-23  | 2.99E-22  |
| Unigene32013 | Potri.017G070300.2 | 9.0467  | 34.0349  | -1.9116 | Down | 3.23E-69  | 4.48E-68  |
| Unigene15260 | Potri.018G066200.1 | 6.0161  | 22.6353  | -1.9117 | Down | 3.96E-25  | 2.08E-24  |
| Unigene8271  | Potri.012G033900.1 | 18.168  | 68.3593  | -1.9117 | Down | 5.29E-97  | 1.09E-95  |
| Unigene88420 | Potri.005G094400.1 | 58.0215 | 218.3034 | -1.9117 | Down | 1.75E-188 | 8.47E-187 |
| Unigene32861 | Potri.008G091700.2 | 5.9364  | 22.3377  | -1.9118 | Down | 4.81E-124 | 1.34E-122 |
| Unigene11576 | Potri.010G036200.1 | 7.7171  | 29.0394  | -1.9119 | Down | 1.48E-51  | 1.49E-50  |
| Unigene40749 | Potri.013G014400.2 | 14.4028 | 54.2102  | -1.9122 | Down | 4.38E-58  | 5.03E-57  |
| Unigene21464 | Potri.001G190200.1 | 5.2399  | 19.7239  | -1.9123 | Down | 3.15E-90  | 5.92E-89  |
| Unigene28438 | Potri.010G036900.1 | 9.406   | 35.4096  | -1.9125 | Down | 3.87E-33  | 2.56E-32  |
| Unigene50023 | Potri.012G058100.3 | 3.4216  | 12.882   | -1.9126 | Down | 1.36E-34  | 9.31E-34  |
| Unigene31667 | Potri.005G026800.1 | 7.6239  | 28.7037  | -1.9126 | Down | 2.55E-35  | 1.78E-34  |
| Unigene42285 | Potri.011G169200.3 | 3.8531  | 14.5078  | -1.9127 | Down | 8.95E-37  | 6.50E-36  |
| Unigene43178 | Potri.005G003300.1 | 4.1786  | 15.7329  | -1.9127 | Down | 4.77E-36  | 3.40E-35  |
| Unigene32661 | Potri.005G107600.1 | 7.3849  | 27.8065  | -1.9128 | Down | 4.76E-144 | 1.61E-142 |
| Unigene1072  | Potri.013G031200.1 | 8.0237  | 30.2168  | -1.913  | Down | 7.34E-42  | 6.01E-41  |
| Unigene24277 | Potri.008G140400.1 | 3.9393  | 14.8353  | -1.913  | Down | 7.34E-42  | 6.01E-41  |
| Unigene74865 | Potri.015G144600.1 | 23.4405 | 88.2969  | -1.9134 | Down | 2.68E-51  | 2.69E-50  |
| Unigene3685  | Potri.014G052100.1 | 36.7742 | 138.5258 | -1.9134 | Down | 5.28E-103 | 1.17E-101 |
| Unigene53910 | Potri.001G368600.1 | 10.6886 | 40.2646  | -1.9134 | Down | 3.36E-54  | 3.57E-53  |
| Unigene31838 | Potri.018G076200.1 | 16.7979 | 63.2823  | -1.9135 | Down | 2.84E-280 | 2.28E-278 |
| Unigene40178 | Potri.001G233800.4 | 9.0093  | 33.941   | -1.9135 | Down | 1.49E-58  | 1.73E-57  |
| Unigene21473 | Potri.014G099300.1 | 17.7497 | 66.8719  | -1.9136 | Down | 5.80E-180 | 2.64E-178 |
| Unigene5162  | Potri.019G116700.1 | 62.4789 | 235.4099 | -1.9137 | Down | 2.81E-266 | 2.11E-264 |
| Unigene49994 | Potri.001G228100.1 | 9.172   | 34.5603  | -1.9138 | Down | 2.52E-72  | 3.67E-71  |

|               |                    |         |          |         |      |           |           |
|---------------|--------------------|---------|----------|---------|------|-----------|-----------|
| Unigene86710  | Potri.015G089300.1 | 29.9619 | 112.9138 | -1.914  | Down | 1.95E-90  | 3.68E-89  |
| Unigene20685  | Potri.019G131500.1 | 1.2774  | 4.8167   | -1.9148 | Down | 5.62E-05  | 1.10E-04  |
| Unigene29246  | Potri.019G030300.2 | 1.3798  | 5.2028   | -1.9148 | Down | 1.99E-12  | 6.46E-12  |
| Unigene36533  | Potri.019G025400.2 | 1.5929  | 6.0063   | -1.9148 | Down | 9.78E-06  | 2.07E-05  |
| Unigene48830  | Potri.018G145800.3 | 5.0956  | 19.2142  | -1.9148 | Down | 9.26E-20  | 4.09E-19  |
| Unigene112748 | Potri.017G050600.1 | 1.213   | 4.5739   | -1.9148 | Down | 3.28E-04  | 5.94E-04  |
| Unigene15249  | Potri.016G032100.1 | 1.3134  | 4.9524   | -1.9148 | Down | 5.62E-05  | 1.10E-04  |
| Unigene16053  | Potri.014G118100.6 | 1.3879  | 5.2334   | -1.9148 | Down | 3.28E-04  | 5.94E-04  |
| Unigene117153 | Potri.010G216100.3 | 1.5006  | 5.6583   | -1.9148 | Down | 1.73E-06  | 3.90E-06  |
| Unigene38490  | Potri.009G107100.1 | 4.0742  | 15.3627  | -1.9148 | Down | 1.11E-22  | 5.39E-22  |
| Unigene98907  | Potri.009G082500.1 | 0.8204  | 3.0934   | -1.9148 | Down | 1.99E-12  | 6.46E-12  |
| Unigene104909 | Potri.009G056200.1 | 1.1584  | 4.368    | -1.9148 | Down | 9.91E-09  | 2.63E-08  |
| Unigene40030  | Potri.008G031600.1 | 1.7439  | 6.5758   | -1.9148 | Down | 1.24E-14  | 4.45E-14  |
| Unigene66109  | Potri.008G011800.1 | 1.8879  | 7.1187   | -1.9148 | Down | 1.34E-25  | 7.15E-25  |
| Unigene105282 | Potri.007G071000.1 | 0.9595  | 3.618    | -1.9148 | Down | 3.28E-04  | 5.94E-04  |
| Unigene105520 | Potri.005G141500.1 | 2.9732  | 11.2111  | -1.9148 | Down | 1.79E-09  | 4.97E-09  |
| Unigene21356  | Potri.005G056800.1 | 2.1135  | 7.9693   | -1.9148 | Down | 2.16E-55  | 2.35E-54  |
| Unigene5278   | Potri.003G111600.3 | 1       | 3.7707   | -1.9148 | Down | 5.62E-05  | 1.10E-04  |
| Unigene49262  | Potri.003G032300.3 | 1.367   | 5.1546   | -1.9148 | Down | 1.73E-06  | 3.90E-06  |
| Unigene37125  | Potri.002G062700.1 | 0.901   | 3.3973   | -1.9148 | Down | 5.62E-05  | 1.10E-04  |
| Unigene107490 | Potri.001G215300.1 | 1.4846  | 5.5979   | -1.9148 | Down | 3.28E-04  | 5.94E-04  |
| Unigene52506  | Potri.019G018400.1 | 4.5383  | 17.1131  | -1.9149 | Down | 3.66E-13  | 1.23E-12  |
| Unigene14780  | Potri.017G012600.3 | 1.1303  | 4.2621   | -1.9149 | Down | 5.62E-05  | 1.10E-04  |
| Unigene104497 | Potri.016G136900.3 | 0.9783  | 3.6891   | -1.9149 | Down | 3.07E-07  | 7.35E-07  |
| Unigene8967   | Potri.015G137100.1 | 1.3563  | 5.1145   | -1.9149 | Down | 5.62E-05  | 1.10E-04  |
| Unigene11159  | Potri.015G050400.1 | 2.1141  | 7.972    | -1.9149 | Down | 7.83E-17  | 3.09E-16  |
| Unigene12180  | Potri.015G035600.6 | 3.1432  | 11.8524  | -1.9149 | Down | 1.99E-12  | 6.46E-12  |
| Unigene15014  | Potri.015G034600.1 | 4.2696  | 16.0996  | -1.9149 | Down | 8.75E-28  | 4.98E-27  |
| Unigene9844   | Potri.015G034000.1 | 8.789   | 33.1412  | -1.9149 | Down | 2.00E-31  | 1.27E-30  |
| Unigene117280 | Potri.014G162200.2 | 0.8429  | 3.1785   | -1.9149 | Down | 3.28E-04  | 5.94E-04  |
| Unigene101425 | Potri.014G158700.1 | 1.0219  | 3.8534   | -1.9149 | Down | 3.28E-04  | 5.94E-04  |
| Unigene117944 | Potri.014G153700.1 | 1.136   | 4.2837   | -1.9149 | Down | 9.78E-06  | 2.07E-05  |
| Unigene3563   | Potri.014G147500.3 | 2.6329  | 9.9281   | -1.9149 | Down | 1.99E-12  | 6.46E-12  |
| Unigene46904  | Potri.014G116600.3 | 0.9267  | 3.4944   | -1.9149 | Down | 3.28E-04  | 5.94E-04  |
| Unigene5784   | Potri.014G076300.5 | 3.2434  | 12.2303  | -1.9149 | Down | 4.23E-16  | 1.62E-15  |
| Unigene35306  | Potri.014G023200.5 | 1.7406  | 6.5636   | -1.9149 | Down | 1.73E-06  | 3.90E-06  |
| Unigene48471  | Potri.014G012100.9 | 0.9348  | 3.525    | -1.9149 | Down | 5.62E-05  | 1.10E-04  |
| Unigene36552  | Potri.013G160600.1 | 68.3997 | 257.92   | -1.9149 | Down | 2.18E-241 | 1.44E-239 |
| Unigene8125   | Potri.013G130800.3 | 24.1219 | 90.9581  | -1.9149 | Down | 3.88E-119 | 1.04E-117 |

|               |                    |         |         |         |      |           |           |
|---------------|--------------------|---------|---------|---------|------|-----------|-----------|
| Unigene68141  | Potri.013G115100.1 | 4.4654  | 16.8382 | -1.9149 | Down | 6.73E-14  | 2.34E-13  |
| Unigene97155  | Potri.013G032100.1 | 1.5582  | 5.8756  | -1.9149 | Down | 3.07E-07  | 7.35E-07  |
| Unigene5930   | Potri.012G136200.1 | 5.777   | 21.7839 | -1.9149 | Down | 2.69E-18  | 1.12E-17  |
| Unigene3337   | Potri.012G060800.2 | 6.2613  | 23.61   | -1.9149 | Down | 4.68E-27  | 2.61E-26  |
| Unigene110438 | Potri.011G089500.1 | 1.6726  | 6.3071  | -1.9149 | Down | 5.62E-05  | 1.10E-04  |
| Unigene28204  | Potri.011G055000.1 | 1.7484  | 6.5929  | -1.9149 | Down | 9.78E-06  | 2.07E-05  |
| Unigene21244  | Potri.010G224100.1 | 1.1024  | 4.1571  | -1.9149 | Down | 9.78E-06  | 2.07E-05  |
| Unigene12303  | Potri.010G216100.3 | 2.9345  | 11.0655 | -1.9149 | Down | 2.29E-15  | 8.48E-15  |
| Unigene114263 | Potri.010G060500.1 | 1.1176  | 4.2142  | -1.9149 | Down | 3.28E-04  | 5.94E-04  |
| Unigene102252 | Potri.009G037000.5 | 0.8854  | 3.3388  | -1.9149 | Down | 3.28E-04  | 5.94E-04  |
| Unigene72677  | Potri.008G106800.1 | 3.2278  | 12.1715 | -1.9149 | Down | 5.50E-08  | 1.39E-07  |
| Unigene101276 | Potri.008G106600.1 | 1.5805  | 5.9597  | -1.9149 | Down | 5.62E-05  | 1.10E-04  |
| Unigene31107  | Potri.008G068600.2 | 1.2601  | 4.7516  | -1.9149 | Down | 5.62E-05  | 1.10E-04  |
| Unigene17019  | Potri.008G063600.4 | 1.4075  | 5.3075  | -1.9149 | Down | 3.07E-07  | 7.35E-07  |
| Unigene7169   | Potri.007G091900.1 | 2.1882  | 8.2514  | -1.9149 | Down | 1.79E-09  | 4.96E-09  |
| Unigene88049  | Potri.007G018400.3 | 0.9153  | 3.4515  | -1.9149 | Down | 3.28E-04  | 5.94E-04  |
| Unigene38898  | Potri.006G250600.1 | 3.0401  | 11.4635 | -1.9149 | Down | 5.95E-11  | 1.79E-10  |
| Unigene101489 | Potri.006G224400.1 | 1.273   | 4.8003  | -1.9149 | Down | 5.62E-05  | 1.10E-04  |
| Unigene64901  | Potri.005G193300.2 | 12.6708 | 47.7786 | -1.9149 | Down | 9.60E-60  | 1.14E-58  |
| Unigene116353 | Potri.005G109500.1 | 1.6525  | 6.2313  | -1.9149 | Down | 1.73E-06  | 3.90E-06  |
| Unigene16950  | Potri.005G104800.2 | 2.7473  | 10.3594 | -1.9149 | Down | 5.95E-11  | 1.79E-10  |
| Unigene29676  | Potri.004G226500.1 | 1.0348  | 3.902   | -1.9149 | Down | 1.79E-09  | 4.97E-09  |
| Unigene23616  | Potri.004G222300.3 | 6.5662  | 24.7596 | -1.9149 | Down | 6.09E-54  | 6.44E-53  |
| Unigene36523  | Potri.003G174600.3 | 1.231   | 4.6419  | -1.9149 | Down | 5.62E-05  | 1.10E-04  |
| Unigene22520  | Potri.003G168000.1 | 9.0423  | 34.0965 | -1.9149 | Down | 3.89E-48  | 3.65E-47  |
| Unigene52629  | Potri.003G044500.1 | 1.1239  | 4.238   | -1.9149 | Down | 3.07E-07  | 7.35E-07  |
| Unigene51336  | Potri.003G030000.1 | 5.1831  | 19.5442 | -1.9149 | Down | 5.96E-22  | 2.83E-21  |
| Unigene83371  | Potri.002G257300.1 | 1.6639  | 6.2743  | -1.9149 | Down | 9.78E-06  | 2.07E-05  |
| Unigene114743 | Potri.002G221500.1 | 1.3563  | 5.1145  | -1.9149 | Down | 5.62E-05  | 1.10E-04  |
| Unigene50017  | Potri.002G178200.3 | 4.4387  | 16.7374 | -1.9149 | Down | 3.86E-24  | 1.97E-23  |
| Unigene103986 | Potri.002G170600.2 | 1.0433  | 3.9342  | -1.9149 | Down | 9.78E-06  | 2.07E-05  |
| Unigene70758  | Potri.002G112100.6 | 37.4851 | 141.348 | -1.9149 | Down | 5.76E-75  | 8.76E-74  |
| Unigene15973  | Potri.002G061000.2 | 1.6077  | 6.0624  | -1.9149 | Down | 5.62E-05  | 1.10E-04  |
| Unigene116692 | Potri.001G384300.1 | 1.3646  | 5.1457  | -1.9149 | Down | 9.78E-06  | 2.07E-05  |
| Unigene16669  | Potri.001G253100.2 | 9.1769  | 34.6039 | -1.9149 | Down | 3.86E-24  | 1.97E-23  |
| Unigene44622  | Potri.001G157300.1 | 19.1315 | 72.1406 | -1.9149 | Down | 1.73E-102 | 3.82E-101 |
| Unigene42076  | Potri.001G156500.2 | 7.8231  | 29.4993 | -1.9149 | Down | 5.96E-22  | 2.83E-21  |
| Unigene15795  | Potri.001G008700.2 | 1.0397  | 3.9205  | -1.9149 | Down | 3.28E-04  | 5.94E-04  |
| Unigene10813  | Potri.015G004000.2 | 6.3085  | 23.7988 | -1.9155 | Down | 8.18E-114 | 2.06E-112 |

|               |                    |          |          |         |      |           |           |
|---------------|--------------------|----------|----------|---------|------|-----------|-----------|
| Unigene32363  | Potri.004G227000.1 | 25.5333  | 96.3316  | -1.9156 | Down | 4.91E-196 | 2.50E-194 |
| Unigene76803  | Potri.001G356900.6 | 111.0807 | 419.1246 | -1.9158 | Down | 7.59E-248 | 5.17E-246 |
| Unigene39631  | Potri.014G111900.1 | 19.6433  | 74.1316  | -1.9161 | Down | 2.62E-127 | 7.58E-126 |
| Unigene1937   | Potri.005G073600.1 | 7.9298   | 29.9332  | -1.9164 | Down | 8.81E-51  | 8.74E-50  |
| Unigene2505   | Potri.008G163300.2 | 16.5945  | 62.6561  | -1.9167 | Down | 5.70E-81  | 9.46E-80  |
| Unigene1018   | Potri.014G139000.1 | 39.8109  | 150.3619 | -1.9172 | Down | 0         | 0         |
| Unigene13260  | Potri.003G100000.1 | 3.9391   | 14.8795  | -1.9174 | Down | 3.64E-31  | 2.28E-30  |
| Unigene16448  | Potri.014G141700.1 | 8.8644   | 33.4877  | -1.9175 | Down | 1.04E-29  | 6.25E-29  |
| Unigene35039  | Potri.004G223800.1 | 18.7108  | 70.6856  | -1.9175 | Down | 5.76E-169 | 2.42E-167 |
| Unigene8109   | Potri.001G255000.1 | 3.9236   | 14.8224  | -1.9175 | Down | 1.04E-29  | 6.25E-29  |
| Unigene45384  | Potri.008G011800.3 | 6.1977   | 23.416   | -1.9177 | Down | 1.94E-81  | 3.25E-80  |
| Unigene77926  | Potri.003G170800.1 | 11.6362  | 43.9633  | -1.9177 | Down | 2.97E-28  | 1.71E-27  |
| Unigene45775  | Potri.001G000900.4 | 52.7013  | 199.12   | -1.9177 | Down | 1.27E-184 | 6.00E-183 |
| Unigene79702  | Potri.018G007100.1 | 21.4014  | 80.8645  | -1.9178 | Down | 1.06E-52  | 1.10E-51  |
| Unigene16694  | Potri.010G099100.2 | 29.8103  | 112.6451 | -1.9179 | Down | 1.22E-75  | 1.87E-74  |
| Unigene41951  | Potri.001G131400.1 | 9.7871   | 36.9829  | -1.9179 | Down | 5.21E-100 | 1.12E-98  |
| Unigene84741  | Potri.001G027400.1 | 26.6805  | 100.8205 | -1.9179 | Down | 6.45E-75  | 9.80E-74  |
| Unigene10686  | Potri.006G086500.1 | 6.8202   | 25.7727  | -1.918  | Down | 1.33E-171 | 5.68E-170 |
| Unigene7569   | Potri.015G139800.1 | 4.644    | 17.5512  | -1.9181 | Down | 1.31E-24  | 6.76E-24  |
| Unigene44769  | Potri.017G101800.1 | 3.0297   | 11.4509  | -1.9182 | Down | 7.01E-24  | 3.54E-23  |
| Unigene61263  | Potri.006G011300.1 | 7.4599   | 28.1955  | -1.9182 | Down | 7.01E-24  | 3.54E-23  |
| Unigene25411  | Potri.001G089500.9 | 5.9718   | 22.5712  | -1.9182 | Down | 7.01E-24  | 3.54E-23  |
| Unigene31767  | Potri.001G285600.1 | 5.692    | 21.5139  | -1.9183 | Down | 2.07E-156 | 7.83E-155 |
| Unigene45205  | Potri.009G139500.3 | 11.3563  | 42.9275  | -1.9184 | Down | 5.45E-44  | 4.67E-43  |
| Unigene3306   | Potri.017G033200.6 | 9.481    | 35.8425  | -1.9186 | Down | 1.35E-62  | 1.68E-61  |
| Unigene9079   | Potri.005G138600.8 | 33.6004  | 127.0317 | -1.9186 | Down | 3.52E-81  | 5.86E-80  |
| Unigene33921  | Potri.004G171600.2 | 21.5874  | 81.6172  | -1.9187 | Down | 2.54E-178 | 1.14E-176 |
| Unigene24495  | Potri.001G326400.1 | 9.9014   | 37.4355  | -1.9187 | Down | 4.86E-119 | 1.29E-117 |
| Unigene50987  | Potri.018G123700.2 | 5.3719   | 20.311   | -1.9188 | Down | 5.83E-21  | 2.68E-20  |
| Unigene32361  | Potri.012G115900.1 | 8.4844   | 32.0792  | -1.9188 | Down | 2.65E-98  | 5.55E-97  |
| Unigene102684 | Potri.016G091700.3 | 3.0052   | 11.3636  | -1.9189 | Down | 3.13E-20  | 1.41E-19  |
| Unigene518    | Potri.015G046700.1 | 8.0042   | 30.2683  | -1.919  | Down | 3.53E-38  | 2.65E-37  |
| Unigene43966  | Potri.003G056700.1 | 10.0674  | 38.0702  | -1.919  | Down | 1.17E-74  | 1.77E-73  |
| Unigene84582  | Potri.005G204100.3 | 6.5274   | 24.6852  | -1.9191 | Down | 1.69E-19  | 7.37E-19  |
| Unigene27845  | Potri.009G096600.1 | 4.184    | 15.8247  | -1.9192 | Down | 9.09E-19  | 3.86E-18  |
| Unigene53081  | Potri.006G170700.1 | 24.4616  | 92.5194  | -1.9192 | Down | 3.62E-53  | 3.78E-52  |
| Unigene100254 | Potri.005G219800.1 | 6.3981   | 24.1991  | -1.9192 | Down | 9.09E-19  | 3.86E-18  |
| Unigene49490  | Potri.003G030000.1 | 5.0521   | 19.1082  | -1.9192 | Down | 9.09E-19  | 3.86E-18  |
| Unigene47579  | Potri.003G040900.1 | 18.5829  | 70.2881  | -1.9193 | Down | 1.93E-52  | 1.98E-51  |



|              |                     |         |          |         |      |           |           |
|--------------|---------------------|---------|----------|---------|------|-----------|-----------|
| Unigene28582 | Potri.014G029700.5  | 4.2818  | 16.1971  | -1.9194 | Down | 4.90E-18  | 2.03E-17  |
| Unigene40858 | Potri.010G154000.1  | 14.0459 | 53.1319  | -1.9194 | Down | 1.52E-34  | 1.04E-33  |
| Unigene61863 | Potri.009G008200.1  | 6.8509  | 25.9154  | -1.9194 | Down | 4.90E-18  | 2.03E-17  |
| Unigene50642 | Potri.015G147100.1  | 10.3327 | 39.087   | -1.9195 | Down | 4.28E-83  | 7.30E-82  |
| Unigene9827  | Potri.008G178200.1  | 26.1403 | 98.8984  | -1.9197 | Down | 1.74E-126 | 4.98E-125 |
| Unigene33072 | Potri.002G172400.1  | 3.0449  | 11.5205  | -1.9197 | Down | 2.32E-32  | 1.50E-31  |
| Unigene32135 | Potri.012G121700.2  | 5.3881  | 20.3863  | -1.9198 | Down | 4.61E-63  | 5.79E-62  |
| Unigene52883 | Potri.010G219200.5  | 7.7939  | 29.4891  | -1.9198 | Down | 4.61E-63  | 5.79E-62  |
| Unigene2395  | Potri.002G124300.1  | 11.868  | 44.9039  | -1.9198 | Down | 6.47E-155 | 2.42E-153 |
| Unigene13519 | Potri.010G240000.2  | 5.0388  | 19.0665  | -1.9199 | Down | 1.24E-31  | 7.86E-31  |
| Unigene48420 | Potri.001G140300.1  | 27.9503 | 105.7616 | -1.9199 | Down | 1.78E-106 | 4.10E-105 |
| Unigene49392 | Potri.001G241700.1  | 8.3395  | 31.5581  | -1.92   | Down | 3.98E-75  | 6.07E-74  |
| Unigene13623 | Potri.017G023200.1  | 4.1357  | 15.6511  | -1.9201 | Down | 1.95E-59  | 2.29E-58  |
| Unigene47585 | Potri.017G001600.1  | 40.2111 | 152.1782 | -1.9201 | Down | 3.84E-188 | 1.85E-186 |
| Unigene36680 | Potri.009G046700.2  | 5.8421  | 22.1099  | -1.9201 | Down | 7.72E-16  | 2.92E-15  |
| Unigene92130 | Potri.001G244600.2  | 25.3017 | 95.7586  | -1.9202 | Down | 6.61E-115 | 1.69E-113 |
| Unigene2185  | Potri.016G130000.1  | 4.896   | 18.531   | -1.9203 | Down | 1.89E-29  | 1.13E-28  |
| Unigene90132 | Potri.013G114600.1  | 22.1404 | 83.8087  | -1.9204 | Down | 7.74E-83  | 1.32E-81  |
| Unigene11016 | Potri.008G048900.2  | 6.4055  | 24.2468  | -1.9204 | Down | 2.57E-150 | 9.24E-149 |
| Unigene3261  | Potri.007G058500.1  | 6.0814  | 23.0191  | -1.9204 | Down | 1.55E-56  | 1.73E-55  |
| Unigene6654  | Potri.001G352600.1  | 3.1153  | 11.7925  | -1.9204 | Down | 4.18E-15  | 1.53E-14  |
| Unigene24918 | Potri.018G055000.4  | 9.4896  | 35.9253  | -1.9206 | Down | 5.40E-28  | 3.09E-27  |
| Unigene21589 | Potri.015G040300.4  | 6.9188  | 26.1933  | -1.9206 | Down | 3.73E-67  | 5.03E-66  |
| Unigene20636 | Potri.012G140400.1  | 15.2946 | 57.9006  | -1.9206 | Down | 3.62E-94  | 7.15E-93  |
| Unigene32353 | Potri.010G067900.1  | 4.6423  | 17.5745  | -1.9206 | Down | 2.32E-54  | 2.48E-53  |
| Unigene5770  | Potri.011G166700.4  | 1.8597  | 7.041    | -1.9207 | Down | 2.89E-27  | 1.62E-26  |
| Unigene44671 | Potri.016G058100.1  | 3.3506  | 12.6873  | -1.9209 | Down | 1.55E-26  | 8.48E-26  |
| Unigene22075 | Potri.015G079900.2  | 2.4179  | 9.1556   | -1.9209 | Down | 1.55E-26  | 8.48E-26  |
| Unigene90759 | Potri.013G058100.1  | 25.8155 | 97.7533  | -1.9209 | Down | 3.76E-101 | 8.15E-100 |
| Unigene39926 | Potri.015G108600.5  | 22.3301 | 84.5582  | -1.921  | Down | 1.99E-100 | 4.28E-99  |
| Unigene31676 | Potri.012G095300.1  | 26.9783 | 102.1695 | -1.9211 | Down | 2.96E-98  | 6.20E-97  |
| Unigene54130 | Potri.014G000500.5  | 10.0301 | 37.9902  | -1.9213 | Down | 4.44E-25  | 2.33E-24  |
| Unigene22929 | Potri.005G022600.1  | 1.5275  | 5.7862   | -1.9214 | Down | 6.69E-13  | 2.22E-12  |
| Unigene77174 | Potri.002G246600.14 | 30.4883 | 115.4888 | -1.9214 | Down | 1.61E-70  | 2.28E-69  |
| Unigene42658 | Potri.018G080400.1  | 4.4904  | 17.0104  | -1.9215 | Down | 2.38E-24  | 1.22E-23  |
| Unigene28462 | Potri.012G020400.1  | 2.1532  | 8.1568   | -1.9215 | Down | 6.69E-13  | 2.22E-12  |
| Unigene9237  | Potri.011G115100.5  | 42.8986 | 162.515  | -1.9216 | Down | 3.55E-192 | 1.76E-190 |
| Unigene11645 | Potri.001G095300.1  | 6.4002  | 24.2468  | -1.9216 | Down | 2.23E-46  | 2.02E-45  |
| Unigene34298 | Potri.019G050700.1  | 4.7115  | 17.8507  | -1.9217 | Down | 1.28E-23  | 6.39E-23  |

|               |                    |         |          |         |      |           |           |
|---------------|--------------------|---------|----------|---------|------|-----------|-----------|
| Unigene30410  | Potri.005G164700.1 | 17.6559 | 66.8914  | -1.9217 | Down | 5.28E-57  | 5.94E-56  |
| Unigene25264  | Potri.004G157500.1 | 3.5299  | 13.3739  | -1.9217 | Down | 1.28E-23  | 6.39E-23  |
| Unigene11537  | Potri.007G109000.2 | 4.7174  | 17.8744  | -1.9218 | Down | 6.32E-45  | 5.53E-44  |
| Unigene87667  | Potri.006G170700.2 | 3.3909  | 12.8492  | -1.9219 | Down | 3.65E-12  | 1.17E-11  |
| Unigene17407  | Potri.003G142900.1 | 2.0448  | 7.7484   | -1.9219 | Down | 3.65E-12  | 1.17E-11  |
| Unigene110351 | Potri.015G078500.2 | 4.8506  | 18.3807  | -1.922  | Down | 3.65E-12  | 1.17E-11  |
| Unigene117821 | Potri.005G193100.1 | 2.8023  | 10.6189  | -1.922  | Down | 3.65E-12  | 1.17E-11  |
| Unigene40436  | Potri.001G314300.1 | 16.7176 | 63.3551  | -1.9221 | Down | 1.31E-74  | 1.97E-73  |
| Unigene30258  | Potri.001G161900.3 | 8.7582  | 33.1916  | -1.9221 | Down | 7.87E-33  | 5.17E-32  |
| Unigene428    | Potri.019G103400.1 | 2.4364  | 9.2343   | -1.9223 | Down | 1.19E-52  | 1.23E-51  |
| Unigene40042  | Potri.010G131000.1 | 9.3494  | 35.4389  | -1.9224 | Down | 1.03E-71  | 1.49E-70  |
| Unigene40416  | Potri.009G123100.1 | 5.5487  | 21.0336  | -1.9225 | Down | 1.97E-21  | 9.21E-21  |
| Unigene39189  | Potri.006G075500.1 | 5.431   | 20.5894  | -1.9226 | Down | 1.44E-40  | 1.14E-39  |
| Unigene43184  | Potri.013G067300.2 | 10.3158 | 39.1106  | -1.9227 | Down | 1.14E-145 | 3.92E-144 |
| Unigene50373  | Potri.012G073500.3 | 3.1265  | 11.8545  | -1.9228 | Down | 5.05E-49  | 4.83E-48  |
| Unigene17021  | Potri.001G015000.1 | 5.5896  | 21.1928  | -1.9228 | Down | 1.06E-20  | 4.84E-20  |
| Unigene21     | Potri.001G472800.2 | 3.7836  | 14.3473  | -1.9229 | Down | 2.69E-48  | 2.54E-47  |
| Unigene31131  | Potri.001G241700.1 | 13.9325 | 52.8317  | -1.9229 | Down | 2.69E-48  | 2.54E-47  |
| Unigene30083  | Potri.001G439600.1 | 2.8257  | 10.7161  | -1.9231 | Down | 1.09E-10  | 3.23E-10  |
| Unigene3591   | Potri.005G165400.9 | 32.3263 | 122.6043 | -1.9232 | Down | 8.65E-83  | 1.47E-81  |
| Unigene23396  | Potri.005G114800.1 | 21.404  | 81.1843  | -1.9233 | Down | 8.10E-251 | 5.60E-249 |
| Unigene41902  | Potri.001G209800.1 | 8.6545  | 32.8311  | -1.9235 | Down | 9.80E-28  | 5.57E-27  |
| Unigene103831 | Potri.010G160700.6 | 4.5511  | 17.2679  | -1.9238 | Down | 1.66E-18  | 6.97E-18  |
| Unigene16146  | Potri.009G029800.1 | 2.6316  | 9.9847   | -1.9238 | Down | 5.99E-10  | 1.71E-09  |
| Unigene45398  | Potri.002G009300.1 | 1.5292  | 5.8021   | -1.9238 | Down | 5.99E-10  | 1.71E-09  |
| Unigene11004  | Potri.014G190600.3 | 16.9211 | 64.2175  | -1.9241 | Down | 1.83E-188 | 8.86E-187 |
| Unigene1533   | Potri.006G080700.3 | 10.657  | 40.4442  | -1.9241 | Down | 2.13E-99  | 4.54E-98  |
| Unigene81782  | Potri.001G302000.1 | 9.762   | 37.0457  | -1.9241 | Down | 2.81E-26  | 1.53E-25  |
| Unigene13258  | Potri.019G041400.4 | 9.3366  | 35.4337  | -1.9242 | Down | 8.06E-75  | 1.22E-73  |
| Unigene41135  | Potri.009G057100.2 | 11.5576 | 43.8641  | -1.9242 | Down | 5.01E-34  | 3.39E-33  |
| Unigene22363  | Potri.017G152800.2 | 2.876   | 10.9163  | -1.9243 | Down | 1.50E-25  | 8.00E-25  |
| Unigene42127  | Potri.016G075700.2 | 8.2465  | 31.3007  | -1.9243 | Down | 1.50E-25  | 8.00E-25  |
| Unigene24493  | Potri.002G257400.3 | 4.209   | 15.9754  | -1.9243 | Down | 1.62E-89  | 3.01E-88  |
| Unigene1095   | Potri.001G204700.1 | 1.8093  | 6.8675   | -1.9244 | Down | 1.50E-25  | 8.00E-25  |
| Unigene25753  | Potri.011G087100.1 | 8.4916  | 32.2337  | -1.9245 | Down | 4.90E-41  | 3.94E-40  |
| Unigene33346  | Potri.006G168800.2 | 8.6492  | 32.8325  | -1.9245 | Down | 9.15E-49  | 8.71E-48  |
| Unigene10250  | Potri.007G048300.1 | 3.2637  | 12.3904  | -1.9246 | Down | 3.30E-09  | 8.99E-09  |
| Unigene43256  | Potri.006G149000.2 | 3.135   | 11.9016  | -1.9246 | Down | 9.21E-56  | 1.01E-54  |
| Unigene33403  | Potri.006G003800.3 | 8.9621  | 34.0241  | -1.9246 | Down | 2.61E-40  | 2.06E-39  |

|               |                    |         |          |         |      |           |           |
|---------------|--------------------|---------|----------|---------|------|-----------|-----------|
| Unigene39143  | Potri.003G065600.1 | 3.4456  | 13.0808  | -1.9246 | Down | 8.06E-25  | 4.20E-24  |
| Unigene35135  | Potri.003G015100.1 | 6.831   | 25.9335  | -1.9246 | Down | 8.06E-25  | 4.20E-24  |
| Unigene20831  | Potri.002G227300.2 | 1.8216  | 6.9156   | -1.9246 | Down | 3.30E-09  | 8.99E-09  |
| Unigene1993   | Potri.005G122500.1 | 0.9865  | 3.7452   | -1.9247 | Down | 3.30E-09  | 8.99E-09  |
| Unigene23839  | Potri.004G030000.1 | 1.9436  | 7.3789   | -1.9247 | Down | 3.30E-09  | 8.99E-09  |
| Unigene32619  | Potri.018G143800.1 | 2.2105  | 8.3931   | -1.9248 | Down | 1.39E-39  | 1.08E-38  |
| Unigene21853  | Potri.001G182700.2 | 5.9412  | 22.5571  | -1.9248 | Down | 1.80E-70  | 2.54E-69  |
| Unigene92285  | Potri.019G055200.1 | 40.9014 | 155.3081 | -1.9249 | Down | 2.14E-189 | 1.04E-187 |
| Unigene12027  | Potri.018G066300.2 | 3.6173  | 13.7358  | -1.925  | Down | 4.32E-24  | 2.20E-23  |
| Unigene28118  | Potri.011G108900.2 | 13.9587 | 53.005   | -1.925  | Down | 1.38E-46  | 1.25E-45  |
| Unigene21681  | Potri.005G137700.1 | 2.6213  | 9.9537   | -1.925  | Down | 1.38E-46  | 1.25E-45  |
| Unigene43281  | Potri.001G251600.1 | 6.4317  | 24.4234  | -1.925  | Down | 4.01E-106 | 9.20E-105 |
| Unigene38744  | Potri.011G164900.1 | 4.4804  | 17.0154  | -1.9251 | Down | 2.60E-16  | 1.00E-15  |
| Unigene30285  | Potri.002G002700.1 | 24.729  | 93.9135  | -1.9251 | Down | 5.52E-90  | 1.03E-88  |
| Unigene4753   | Potri.016G032400.2 | 31.5918 | 119.9836 | -1.9252 | Down | 2.93E-89  | 5.43E-88  |
| Unigene74289  | Potri.011G049300.2 | 34.3503 | 130.4617 | -1.9252 | Down | 1.46E-74  | 2.20E-73  |
| Unigene1736   | Potri.009G120500.3 | 6.0935  | 23.143   | -1.9252 | Down | 3.95E-38  | 2.96E-37  |
| Unigene5684   | Potri.001G130900.1 | 12.6505 | 48.0536  | -1.9255 | Down | 2.11E-37  | 1.55E-36  |
| Unigene119424 | Potri.017G060200.1 | 2.7647  | 10.5035  | -1.9257 | Down | 1.24E-22  | 6.03E-22  |
| Unigene13790  | Potri.003G085000.1 | 4.1688  | 15.8377  | -1.9257 | Down | 1.12E-36  | 8.13E-36  |
| Unigene100580 | Potri.001G317400.1 | 1.8265  | 6.9392   | -1.9257 | Down | 1.41E-15  | 5.26E-15  |
| Unigene84946  | Potri.015G065400.4 | 69.3271 | 263.4048 | -1.9258 | Down | 3.90E-195 | 1.97E-193 |
| Unigene92580  | Potri.010G043400.1 | 48.4588 | 184.1273 | -1.9259 | Down | 8.17E-235 | 5.14E-233 |
| Unigene2082   | Potri.012G118500.1 | 2.8976  | 11.0112  | -1.926  | Down | 6.68E-22  | 3.16E-21  |
| Unigene33816  | Potri.001G081400.1 | 17.9194 | 68.0945  | -1.926  | Down | 3.78E-137 | 1.21E-135 |
| Unigene19782  | Potri.007G034500.1 | 26.1227 | 99.2729  | -1.9261 | Down | 9.38E-76  | 1.44E-74  |
| Unigene65158  | Potri.006G118900.1 | 4.4404  | 16.8743  | -1.9261 | Down | 6.68E-22  | 3.16E-21  |
| Unigene101790 | Potri.015G054800.1 | 15.4443 | 58.7081  | -1.9265 | Down | 8.88E-41  | 7.09E-40  |
| Unigene21549  | Potri.017G100300.1 | 4.8357  | 18.3837  | -1.9266 | Down | 1.34E-59  | 1.59E-58  |
| Unigene106409 | Potri.001G119700.1 | 2.351   | 8.9382   | -1.9267 | Down | 4.73E-40  | 3.71E-39  |
| Unigene40223  | Potri.011G131300.1 | 1.8779  | 7.1405   | -1.9269 | Down | 1.93E-20  | 8.72E-20  |
| Unigene30251  | Potri.010G130800.3 | 4.5783  | 17.4088  | -1.9269 | Down | 4.14E-14  | 1.45E-13  |
| Unigene20595  | Potri.007G103600.1 | 6.949   | 26.4231  | -1.9269 | Down | 9.53E-27  | 5.26E-26  |
| Unigene19732  | Potri.007G087200.4 | 2.6202  | 9.9633   | -1.9269 | Down | 1.02E-07  | 2.51E-07  |
| Unigene34146  | Potri.006G180100.1 | 4.8404  | 18.4054  | -1.9269 | Down | 9.53E-27  | 5.26E-26  |
| Unigene79704  | Potri.005G147400.7 | 7.7962  | 29.6448  | -1.9269 | Down | 1.93E-20  | 8.72E-20  |
| Unigene29795  | Potri.003G070500.4 | 2.2249  | 8.46     | -1.9269 | Down | 1.02E-07  | 2.51E-07  |
| Unigene51341  | Potri.003G003400.2 | 2.411   | 9.1677   | -1.9269 | Down | 1.02E-07  | 2.51E-07  |
| Unigene102170 | Potri.002G026800.2 | 1.7     | 6.4641   | -1.9269 | Down | 1.02E-07  | 2.51E-07  |

|               |                    |          |          |         |      |           |           |
|---------------|--------------------|----------|----------|---------|------|-----------|-----------|
| Unigene13090  | Potri.006G024900.2 | 9.8011   | 37.2749  | -1.9272 | Down | 4.48E-106 | 1.03E-104 |
| Unigene96254  | Potri.001G183600.1 | 1.4099   | 5.3626   | -1.9273 | Down | 5.10E-26  | 2.75E-25  |
| Unigene12501  | Potri.005G048900.1 | 5.3755   | 20.4472  | -1.9274 | Down | 7.16E-38  | 5.34E-37  |
| Unigene63428  | Potri.014G161600.2 | 6.4557   | 24.5576  | -1.9275 | Down | 1.38E-31  | 8.78E-31  |
| Unigene26585  | Potri.010G244700.1 | 21.1271  | 80.3704  | -1.9276 | Down | 4.01E-85  | 7.05E-84  |
| Unigene103637 | Potri.011G046900.1 | 1.0572   | 4.0221   | -1.9277 | Down | 2.25E-13  | 7.63E-13  |
| Unigene5896   | Potri.010G129800.5 | 9.5487   | 36.3274  | -1.9277 | Down | 2.73E-25  | 1.44E-24  |
| Unigene15932  | Potri.007G077100.1 | 8.0648   | 30.6819  | -1.9277 | Down | 2.73E-25  | 1.44E-24  |
| Unigene53498  | Potri.003G058300.1 | 5.8797   | 22.3691  | -1.9277 | Down | 2.25E-13  | 7.63E-13  |
| Unigene92743  | Potri.016G084400.2 | 101.4548 | 386.0191 | -1.9278 | Down | 0         | 0         |
| Unigene50462  | Potri.004G225800.4 | 5.9409   | 22.6042  | -1.9278 | Down | 7.39E-31  | 4.60E-30  |
| Unigene83780  | Potri.002G239900.1 | 47.7215  | 181.5721 | -1.9278 | Down | 4.02E-130 | 1.20E-128 |
| Unigene23042  | Potri.018G003100.1 | 39.1717  | 149.0525 | -1.9279 | Down | 1.71E-302 | 1.53E-300 |
| Unigene3182   | Potri.017G058300.3 | 11.2434  | 42.7809  | -1.9279 | Down | 9.51E-95  | 1.90E-93  |
| Unigene36998  | Potri.009G116100.2 | 7.0975   | 27.0071  | -1.928  | Down | 5.59E-19  | 2.40E-18  |
| Unigene31226  | Potri.001G368600.1 | 13.4624  | 51.2295  | -1.928  | Down | 5.68E-42  | 4.66E-41  |
| Unigene44677  | Potri.010G093700.3 | 12.451   | 47.3817  | -1.9281 | Down | 9.18E-88  | 1.67E-86  |
| Unigene82650  | Potri.008G117100.1 | 24.2518  | 92.2885  | -1.9281 | Down | 6.97E-65  | 9.03E-64  |
| Unigene42461  | Potri.014G071400.2 | 8.5467   | 32.5282  | -1.9283 | Down | 8.55E-245 | 5.74E-243 |
| Unigene9231   | Potri.019G089000.1 | 0.8216   | 3.1275   | -1.9285 | Down | 5.68E-07  | 1.33E-06  |
| Unigene9635   | Potri.019G036900.1 | 1.0864   | 4.1356   | -1.9285 | Down | 5.68E-07  | 1.33E-06  |
| Unigene48512  | Potri.018G147400.1 | 11.1263  | 42.3543  | -1.9285 | Down | 1.61E-40  | 1.28E-39  |
| Unigene20631  | Potri.011G155400.4 | 1.6529   | 6.2919   | -1.9285 | Down | 1.22E-12  | 4.01E-12  |
| Unigene48727  | Potri.007G123800.5 | 3.2529   | 12.3827  | -1.9285 | Down | 3.01E-18  | 1.26E-17  |
| Unigene45332  | Potri.006G125400.4 | 2.6023   | 9.9061   | -1.9285 | Down | 7.86E-24  | 3.96E-23  |
| Unigene11611  | Potri.004G177700.1 | 7.5863   | 28.8789  | -1.9285 | Down | 2.10E-90  | 3.96E-89  |
| Unigene106119 | Potri.003G199800.1 | 1.6456   | 6.2642   | -1.9285 | Down | 5.68E-07  | 1.33E-06  |
| Unigene23300  | Potri.003G076600.3 | 2.1073   | 8.0219   | -1.9285 | Down | 1.22E-12  | 4.01E-12  |
| Unigene71496  | Potri.001G102200.1 | 5.5122   | 20.9834  | -1.9285 | Down | 1.22E-12  | 4.01E-12  |
| Unigene46387  | Potri.014G134900.1 | 1.1145   | 4.2427   | -1.9286 | Down | 5.68E-07  | 1.33E-06  |
| Unigene31693  | Potri.012G110200.1 | 1.5541   | 5.9162   | -1.9286 | Down | 5.68E-07  | 1.33E-06  |
| Unigene25643  | Potri.010G150000.3 | 2.3607   | 8.9866   | -1.9286 | Down | 5.68E-07  | 1.33E-06  |
| Unigene10112  | Potri.001G213700.1 | 1.1418   | 4.3466   | -1.9286 | Down | 5.68E-07  | 1.33E-06  |
| Unigene52807  | Potri.005G219800.1 | 21.1398  | 80.4799  | -1.9287 | Down | 1.32E-78  | 2.13E-77  |
| Unigene86358  | Potri.001G306300.1 | 12.7636  | 48.5961  | -1.9288 | Down | 8.58E-40  | 6.69E-39  |
| Unigene23713  | Potri.004G174700.1 | 2.299    | 8.7545   | -1.929  | Down | 4.21E-23  | 2.08E-22  |
| Unigene29594  | Potri.018G107500.2 | 19.9272  | 75.8977  | -1.9293 | Down | 4.28E-117 | 1.12E-115 |
| Unigene10031  | Potri.010G199300.1 | 8.5256   | 32.4762  | -1.9295 | Down | 3.63E-43  | 3.06E-42  |
| Unigene9521   | Potri.001G183100.1 | 1.5729   | 5.9915   | -1.9295 | Down | 6.68E-12  | 2.11E-11  |

|               |                    |         |          |         |      |           |           |
|---------------|--------------------|---------|----------|---------|------|-----------|-----------|
| Unigene12794  | Potri.004G186500.2 | 18.1599 | 69.1805  | -1.9296 | Down | 1.40E-104 | 3.16E-103 |
| Unigene36312  | Potri.008G024500.1 | 1.1688  | 4.4529   | -1.9297 | Down | 3.23E-27  | 1.81E-26  |
| Unigene87101  | Potri.007G052800.4 | 36.2201 | 137.9994 | -1.9298 | Down | 1.78E-113 | 4.46E-112 |
| Unigene462    | Potri.001G336800.1 | 20.5717 | 78.3765  | -1.9298 | Down | 2.10E-215 | 1.19E-213 |
| Unigene63037  | Potri.001G189700.1 | 3.1532  | 12.0141  | -1.9298 | Down | 8.78E-17  | 3.46E-16  |
| Unigene24394  | Potri.019G056400.3 | 12.1887 | 46.447   | -1.93   | Down | 1.03E-81  | 1.74E-80  |
| Unigene53912  | Potri.002G188400.1 | 7.7767  | 29.6346  | -1.9301 | Down | 1.03E-41  | 8.39E-41  |
| Unigene82928  | Potri.005G049100.3 | 22.5205 | 85.8295  | -1.9302 | Down | 5.32E-61  | 6.44E-60  |
| Unigene44568  | Potri.003G004100.1 | 42.1991 | 160.826  | -1.9302 | Down | 2.77E-199 | 1.44E-197 |
| Unigene29710  | Potri.001G161700.4 | 23.2472 | 88.5944  | -1.9302 | Down | 2.32E-51  | 2.33E-50  |
| Unigene51153  | Potri.001G011900.1 | 20.3452 | 77.5475  | -1.9304 | Down | 1.23E-50  | 1.22E-49  |
| Unigene53536  | Potri.018G080400.1 | 2.3201  | 8.8446   | -1.9306 | Down | 3.20E-06  | 7.08E-06  |
| Unigene6045   | Potri.015G137600.4 | 11.2393 | 42.8465  | -1.9306 | Down | 1.97E-35  | 1.38E-34  |
| Unigene118579 | Potri.010G076200.1 | 2.1221  | 8.0898   | -1.9306 | Down | 3.65E-11  | 1.11E-10  |
| Unigene114983 | Potri.006G219500.2 | 8.6588  | 33.0093  | -1.9306 | Down | 9.27E-26  | 4.96E-25  |
| Unigene31402  | Potri.006G204200.1 | 5.1694  | 19.707   | -1.9306 | Down | 9.27E-26  | 4.96E-25  |
| Unigene119528 | Potri.005G113400.1 | 1.8009  | 6.8654   | -1.9306 | Down | 6.53E-21  | 2.99E-20  |
| Unigene103709 | Potri.004G122100.2 | 2.0374  | 7.7669   | -1.9306 | Down | 3.65E-11  | 1.11E-10  |
| Unigene64642  | Potri.001G392600.2 | 1.9914  | 7.5915   | -1.9306 | Down | 3.65E-11  | 1.11E-10  |
| Unigene51843  | Potri.018G135300.1 | 1.5393  | 5.8683   | -1.9307 | Down | 3.20E-06  | 7.08E-06  |
| Unigene51390  | Potri.015G091400.5 | 2.0546  | 7.8327   | -1.9307 | Down | 3.20E-06  | 7.08E-06  |
| Unigene50708  | Potri.012G046400.1 | 1.7442  | 6.6494   | -1.9307 | Down | 4.75E-16  | 1.81E-15  |
| Unigene56061  | Potri.004G168500.4 | 2.493   | 9.504    | -1.9307 | Down | 3.65E-11  | 1.11E-10  |
| Unigene118758 | Potri.001G081700.1 | 1.0039  | 3.8272   | -1.9307 | Down | 3.20E-06  | 7.08E-06  |
| Unigene40633  | Potri.010G115000.6 | 27.2924 | 104.0568 | -1.9308 | Down | 1.85E-68  | 2.53E-67  |
| Unigene45606  | Potri.008G026700.1 | 4.5892  | 17.4977  | -1.9309 | Down | 5.26E-54  | 5.56E-53  |
| Unigene30915  | Potri.004G227700.7 | 10.2674 | 39.1482  | -1.9309 | Down | 3.48E-49  | 3.34E-48  |
| Unigene883    | Potri.003G137100.1 | 5.911   | 22.5382  | -1.9309 | Down | 9.43E-125 | 2.66E-123 |
| Unigene115012 | Potri.004G103700.4 | 16.7251 | 63.7815  | -1.9311 | Down | 1.85E-48  | 1.75E-47  |
| Unigene23330  | Potri.018G064800.2 | 4.7733  | 18.2039  | -1.9312 | Down | 1.23E-43  | 1.05E-42  |
| Unigene38046  | Potri.014G025200.1 | 8.7971  | 33.5509  | -1.9313 | Down | 3.51E-20  | 1.57E-19  |
| Unigene115616 | Potri.017G001600.1 | 4.6942  | 17.9057  | -1.9315 | Down | 2.57E-15  | 9.49E-15  |
| Unigene32340  | Potri.007G087200.4 | 3.2938  | 12.5639  | -1.9315 | Down | 6.57E-43  | 5.51E-42  |
| Unigene17222  | Potri.007G146500.1 | 4.5415  | 17.3254  | -1.9316 | Down | 2.66E-24  | 1.36E-23  |
| Unigene7800   | Potri.002G237600.1 | 1.502   | 5.7311   | -1.9319 | Down | 2.00E-10  | 5.85E-10  |
| Unigene113753 | Potri.002G189900.1 | 3.4563  | 13.1882  | -1.9319 | Down | 2.00E-10  | 5.85E-10  |
| Unigene34745  | Potri.002G023300.2 | 4.6203  | 17.6296  | -1.9319 | Down | 5.11E-73  | 7.53E-72  |
| Unigene37843  | Potri.001G076700.3 | 46.5761 | 177.7102 | -1.9319 | Down | 1.76E-180 | 8.07E-179 |
| Unigene47742  | Potri.015G040100.1 | 3.6096  | 13.7732  | -1.932  | Down | 2.00E-10  | 5.85E-10  |

|               |                    |          |          |         |      |           |           |
|---------------|--------------------|----------|----------|---------|------|-----------|-----------|
| Unigene101710 | Potri.007G074800.3 | 1.2048   | 4.5972   | -1.932  | Down | 1.89E-19  | 8.24E-19  |
| Unigene3125   | Potri.006G119500.1 | 4.7532   | 18.1376  | -1.932  | Down | 4.16E-77  | 6.53E-76  |
| Unigene78901  | Potri.008G064400.1 | 18.4157  | 70.2821  | -1.9322 | Down | 1.48E-45  | 1.32E-44  |
| Unigene34573  | Potri.017G124300.1 | 10.657   | 40.6747  | -1.9323 | Down | 1.50E-97  | 3.11E-96  |
| Unigene78115  | Potri.014G165500.4 | 14.9198  | 56.9433  | -1.9323 | Down | 1.25E-36  | 9.07E-36  |
| Unigene60871  | Potri.011G146300.1 | 3.6983   | 14.116   | -1.9324 | Down | 1.39E-14  | 4.98E-14  |
| Unigene66489  | Potri.003G115600.1 | 5.4547   | 20.8202  | -1.9324 | Down | 9.92E-41  | 7.91E-40  |
| Unigene26704  | Potri.011G111400.2 | 7.727    | 29.4966  | -1.9326 | Down | 8.52E-32  | 5.44E-31  |
| Unigene47420  | Potri.019G041900.1 | 22.4098  | 85.5556  | -1.9327 | Down | 4.07E-57  | 4.58E-56  |
| Unigene53067  | Potri.014G042800.1 | 8.1704   | 31.1914  | -1.9327 | Down | 1.02E-18  | 4.32E-18  |
| Unigene31160  | Potri.005G244700.1 | 92.3704  | 352.6397 | -1.9327 | Down | 0         | 0         |
| Unigene4906   | Potri.001G346200.1 | 21.6442  | 82.6344  | -1.9328 | Down | 2.67E-78  | 4.28E-77  |
| Unigene34245  | Potri.013G031700.1 | 10.4     | 39.7124  | -1.933  | Down | 7.67E-90  | 1.43E-88  |
| Unigene79620  | Potri.005G053900.3 | 27.6293  | 105.5068 | -1.9331 | Down | 1.14E-68  | 1.57E-67  |
| Unigene39501  | Potri.003G128100.1 | 3.4871   | 13.3168  | -1.9331 | Down | 2.24E-43  | 1.89E-42  |
| Unigene43601  | Potri.015G002300.1 | 34.5238  | 131.8635 | -1.9334 | Down | 2.33E-297 | 2.04E-295 |
| Unigene40796  | Potri.007G058700.1 | 1.2396   | 4.7348   | -1.9334 | Down | 1.83E-05  | 3.76E-05  |
| Unigene71585  | Potri.006G110700.1 | 2.0113   | 7.6825   | -1.9334 | Down | 1.83E-05  | 3.76E-05  |
| Unigene95536  | Potri.005G194900.1 | 0.8862   | 3.3849   | -1.9334 | Down | 1.83E-05  | 3.76E-05  |
| Unigene52199  | Potri.T153000.1    | 12.1698  | 46.4854  | -1.9335 | Down | 4.91E-59  | 5.74E-58  |
| Unigene54551  | Potri.T002700.1    | 6.4252   | 24.5426  | -1.9335 | Down | 2.43E-30  | 1.49E-29  |
| Unigene358    | Potri.016G144000.2 | 1.939    | 7.4065   | -1.9335 | Down | 4.11E-22  | 1.96E-21  |
| Unigene35136  | Potri.014G043000.1 | 2.2178   | 8.4715   | -1.9335 | Down | 1.10E-09  | 3.08E-09  |
| Unigene15617  | Potri.009G038600.1 | 0.8958   | 3.4219   | -1.9335 | Down | 1.83E-05  | 3.76E-05  |
| Unigene5848   | Potri.006G111800.3 | 8.3393   | 31.8541  | -1.9335 | Down | 4.11E-22  | 1.96E-21  |
| Unigene108196 | Potri.006G111100.2 | 2.0014   | 7.645    | -1.9335 | Down | 1.83E-05  | 3.76E-05  |
| Unigene8918   | Potri.005G076200.3 | 1.4396   | 5.499    | -1.9335 | Down | 1.10E-09  | 3.08E-09  |
| Unigene6029   | Potri.002G176200.2 | 1.3067   | 4.9912   | -1.9335 | Down | 1.83E-05  | 3.76E-05  |
| Unigene31010  | Potri.014G165500.4 | 9.4761   | 36.2029  | -1.9337 | Down | 3.24E-54  | 3.44E-53  |
| Unigene93198  | Potri.011G103700.1 | 8.9135   | 34.054   | -1.9338 | Down | 4.04E-50  | 3.95E-49  |
| Unigene32166  | Potri.005G080600.1 | 5.2398   | 20.0199  | -1.9339 | Down | 5.94E-74  | 8.88E-73  |
| Unigene12123  | Potri.001G164900.1 | 2.9019   | 11.0884  | -1.934  | Down | 1.30E-29  | 7.81E-29  |
| Unigene49032  | Potri.018G048600.1 | 6.3828   | 24.3905  | -1.9341 | Down | 1.68E-25  | 8.94E-25  |
| Unigene24254  | Potri.014G103600.1 | 4.018    | 15.3553  | -1.9342 | Down | 3.37E-41  | 2.72E-40  |
| Unigene8591   | Potri.014G172800.3 | 5.0051   | 19.1297  | -1.9343 | Down | 2.96E-17  | 1.19E-16  |
| Unigene137    | Potri.001G423600.1 | 4.5239   | 17.2905  | -1.9343 | Down | 6.50E-131 | 1.95E-129 |
| Unigene91371  | Potri.005G154300.1 | 176.9498 | 676.3228 | -1.9344 | Down | 0         | 0         |
| Unigene24257  | Potri.017G039400.1 | 18.2548  | 69.7804  | -1.9345 | Down | 3.11E-79  | 5.05E-78  |
| Unigene45457  | Potri.008G140900.3 | 2.8275   | 10.8079  | -1.9345 | Down | 6.95E-29  | 4.09E-28  |

|               |                    |         |          |         |      |           |           |
|---------------|--------------------|---------|----------|---------|------|-----------|-----------|
| Unigene71463  | Potri.004G223800.1 | 36.1971 | 138.3717 | -1.9346 | Down | 3.82E-75  | 5.83E-74  |
| Unigene28626  | Potri.008G060800.1 | 3.5761  | 13.6713  | -1.9347 | Down | 2.27E-36  | 1.63E-35  |
| Unigene72368  | Potri.006G066000.1 | 35.3078 | 134.9911 | -1.9348 | Down | 2.03E-74  | 3.05E-73  |
| Unigene68912  | Potri.002G139500.1 | 5.8894  | 22.5186  | -1.9349 | Down | 1.19E-20  | 5.40E-20  |
| Unigene48965  | Potri.001G053500.1 | 10.9958 | 42.0435  | -1.9349 | Down | 9.57E-40  | 7.46E-39  |
| Unigene4426   | Potri.010G138600.3 | 15.57   | 59.5405  | -1.9351 | Down | 1.21E-35  | 8.55E-35  |
| Unigene21593  | Potri.006G143400.3 | 10.73   | 41.0321  | -1.9351 | Down | 1.67E-103 | 3.71E-102 |
| Unigene50190  | Potri.010G185000.1 | 5.0521  | 19.3206  | -1.9352 | Down | 7.23E-107 | 1.68E-105 |
| Unigene59317  | Potri.004G075500.5 | 17.4746 | 66.8285  | -1.9352 | Down | 1.63E-65  | 2.14E-64  |
| Unigene14313  | Potri.018G145800.4 | 11.2059 | 42.8585  | -1.9353 | Down | 5.86E-54  | 6.20E-53  |
| Unigene115812 | Potri.017G036600.2 | 12.4748 | 47.7115  | -1.9353 | Down | 5.10E-39  | 3.91E-38  |
| Unigene102817 | Potri.014G078800.5 | 1.1841  | 4.5288   | -1.9353 | Down | 6.07E-09  | 1.63E-08  |
| Unigene118137 | Potri.013G154600.3 | 1.8195  | 6.9589   | -1.9353 | Down | 6.07E-09  | 1.63E-08  |
| Unigene81428  | Potri.004G186300.1 | 2.937   | 11.2329  | -1.9353 | Down | 6.07E-09  | 1.63E-08  |
| Unigene25208  | Potri.004G006000.2 | 2.6834  | 10.2631  | -1.9353 | Down | 6.07E-09  | 1.63E-08  |
| Unigene21269  | Potri.012G024700.3 | 10.8316 | 41.4304  | -1.9354 | Down | 4.03E-246 | 2.72E-244 |
| Unigene81540  | Potri.001G068000.1 | 30.571  | 116.9311 | -1.9354 | Down | 1.06E-79  | 1.73E-78  |
| Unigene44915  | Potri.007G051900.1 | 27.2373 | 104.2012 | -1.9357 | Down | 7.22E-119 | 1.92E-117 |
| Unigene27830  | Potri.018G129900.2 | 33.8332 | 129.4448 | -1.9358 | Down | 5.07E-260 | 3.70E-258 |
| Unigene50407  | Potri.003G031700.1 | 5.1584  | 19.7364  | -1.9359 | Down | 8.26E-31  | 5.13E-30  |
| Unigene88374  | Potri.001G214700.5 | 38.3107 | 146.5792 | -1.9359 | Down | 5.94E-129 | 1.74E-127 |
| Unigene12946  | Potri.016G041000.1 | 1.5564  | 5.9555   | -1.936  | Down | 2.24E-12  | 7.23E-12  |
| Unigene12202  | Potri.011G103400.1 | 1.7197  | 6.5804   | -1.936  | Down | 2.24E-12  | 7.23E-12  |
| Unigene63242  | Potri.008G078600.1 | 6.5957  | 25.2383  | -1.936  | Down | 2.59E-23  | 1.29E-22  |
| Unigene2665   | Potri.006G136900.1 | 4.2308  | 16.1893  | -1.936  | Down | 3.45E-34  | 2.34E-33  |
| Unigene29033  | Potri.001G402800.1 | 4.1724  | 15.9656  | -1.936  | Down | 4.86E-45  | 4.27E-44  |
| Unigene51683  | Potri.001G352700.1 | 2.7951  | 10.6953  | -1.936  | Down | 2.24E-12  | 7.23E-12  |
| Unigene19007  | Potri.001G370900.1 | 5.7983  | 22.1904  | -1.9362 | Down | 1.06E-26  | 5.87E-26  |
| Unigene94083  | Potri.015G146600.1 | 32.8965 | 125.8991 | -1.9363 | Down | 3.67E-244 | 2.46E-242 |
| Unigene1233   | Potri.003G154000.1 | 7.9795  | 30.5388  | -1.9363 | Down | 5.57E-66  | 7.36E-65  |
| Unigene11440  | Potri.011G149700.1 | 10.2977 | 39.4152  | -1.9364 | Down | 6.01E-147 | 2.10E-145 |
| Unigene21214  | Potri.T012200.3    | 6.4527  | 24.6989  | -1.9365 | Down | 1.10E-47  | 1.02E-46  |
| Unigene84334  | Potri.001G097700.1 | 49.6878 | 190.1906 | -1.9365 | Down | 1.67E-139 | 5.45E-138 |
| Unigene27554  | Potri.002G046300.3 | 3.4107  | 13.0563  | -1.9366 | Down | 3.44E-19  | 1.49E-18  |
| Unigene31420  | Potri.T134200.6    | 8.6528  | 33.1256  | -1.9367 | Down | 3.26E-40  | 2.57E-39  |
| Unigene10892  | Potri.003G202800.1 | 15.1475 | 57.9903  | -1.9367 | Down | 5.65E-260 | 4.12E-258 |
| Unigene19557  | Potri.001G292000.3 | 10.5545 | 40.406   | -1.9367 | Down | 3.26E-40  | 2.57E-39  |
| Unigene4616   | Potri.012G144200.2 | 8.2888  | 31.7336  | -1.9368 | Down | 1.39E-22  | 6.73E-22  |
| Unigene91292  | Potri.005G208600.2 | 12.5233 | 47.9505  | -1.9369 | Down | 1.06E-53  | 1.12E-52  |

|               |                    |         |          |         |      |           |           |
|---------------|--------------------|---------|----------|---------|------|-----------|-----------|
| Unigene28745  | Potri.005G088800.1 | 2.9388  | 11.2519  | -1.9369 | Down | 5.70E-26  | 3.07E-25  |
| Unigene13389  | Potri.017G028200.1 | 7.4763  | 28.6323  | -1.9372 | Down | 3.51E-104 | 7.87E-103 |
| Unigene34687  | Potri.006G231000.3 | 13.5786 | 52.0079  | -1.9374 | Down | 2.28E-93  | 4.46E-92  |
| Unigene29514  | Potri.005G134200.1 | 1.1153  | 4.2722   | -1.9375 | Down | 1.05E-04  | 2.02E-04  |
| Unigene19345  | Potri.004G099500.3 | 1.5986  | 6.1235   | -1.9375 | Down | 3.36E-08  | 8.62E-08  |
| Unigene27350  | Potri.001G255500.1 | 1.138   | 4.3591   | -1.9375 | Down | 1.05E-04  | 2.02E-04  |
| Unigene113953 | Potri.017G085600.1 | 1.2813  | 4.9081   | -1.9376 | Down | 1.05E-04  | 2.02E-04  |
| Unigene93937  | Potri.017G078500.1 | 46.4885 | 178.0802 | -1.9376 | Down | 0         | 0         |
| Unigene7458   | Potri.016G000200.4 | 6.6302  | 25.3977  | -1.9376 | Down | 1.01E-65  | 1.32E-64  |
| Unigene47954  | Potri.013G046300.3 | 6.5395  | 25.0505  | -1.9376 | Down | 7.47E-22  | 3.54E-21  |
| Unigene102964 | Potri.009G159900.2 | 1.7334  | 6.6399   | -1.9376 | Down | 1.22E-11  | 3.81E-11  |
| Unigene46534  | Potri.009G158700.5 | 1.502   | 5.7536   | -1.9376 | Down | 3.36E-08  | 8.62E-08  |
| Unigene113935 | Potri.009G087000.3 | 1.2813  | 4.9081   | -1.9376 | Down | 1.05E-04  | 2.02E-04  |
| Unigene15914  | Potri.009G058100.1 | 0.9932  | 3.8045   | -1.9376 | Down | 1.05E-04  | 2.02E-04  |
| Unigene31606  | Potri.005G227300.4 | 2.2682  | 8.6887   | -1.9376 | Down | 1.22E-11  | 3.81E-11  |
| Unigene9486   | Potri.005G209900.3 | 1.2032  | 4.6091   | -1.9376 | Down | 1.05E-04  | 2.02E-04  |
| Unigene47558  | Potri.002G082000.1 | 1.0864  | 4.1616   | -1.9376 | Down | 1.05E-04  | 2.02E-04  |
| Unigene3826   | Potri.001G442900.1 | 1.0409  | 3.9874   | -1.9376 | Down | 3.36E-08  | 8.62E-08  |
| Unigene5610   | Potri.011G072100.1 | 0.8413  | 3.2229   | -1.9377 | Down | 1.05E-04  | 2.02E-04  |
| Unigene1016   | Potri.009G149900.1 | 8.4136  | 32.2321  | -1.9377 | Down | 5.46E-139 | 1.77E-137 |
| Unigene84058  | Potri.008G153800.6 | 44.8951 | 171.9927 | -1.9377 | Down | 1.52E-125 | 4.32E-124 |
| Unigene91204  | Potri.002G055600.4 | 54.4937 | 208.767  | -1.9377 | Down | 1.28E-225 | 7.69E-224 |
| Unigene23645  | Potri.012G063800.1 | 6.6801  | 25.5953  | -1.9379 | Down | 6.36E-98  | 1.33E-96  |
| Unigene22164  | Potri.005G189600.1 | 9.9172  | 37.9973  | -1.9379 | Down | 2.25E-111 | 5.54E-110 |
| Unigene28555  | Potri.001G278800.2 | 6.2166  | 23.8229  | -1.9382 | Down | 2.80E-31  | 1.76E-30  |
| Unigene27     | Potri.015G061400.1 | 2.825   | 10.8274  | -1.9384 | Down | 4.68E-44  | 4.02E-43  |
| Unigene38833  | Potri.005G072100.1 | 12.2758 | 47.0523  | -1.9384 | Down | 3.51E-60  | 4.19E-59  |
| Unigene51936  | Potri.002G171700.1 | 12.2525 | 46.9606  | -1.9384 | Down | 4.68E-44  | 4.02E-43  |
| Unigene79923  | Potri.001G118100.3 | 15.8333 | 60.6879  | -1.9384 | Down | 1.11E-40  | 8.82E-40  |
| Unigene109930 | Potri.014G066000.4 | 16.1802 | 62.021   | -1.9385 | Down | 2.62E-37  | 1.93E-36  |
| Unigene91978  | Potri.019G054800.1 | 14.3524 | 55.0187  | -1.9386 | Down | 3.43E-66  | 4.55E-65  |
| Unigene71327  | Potri.005G172400.1 | 7.9009  | 30.2874  | -1.9386 | Down | 9.99E-18  | 4.08E-17  |
| Unigene39123  | Potri.001G212600.4 | 3.3695  | 12.9167  | -1.9386 | Down | 9.99E-18  | 4.08E-17  |
| Unigene41288  | Potri.017G097100.1 | 8.6743  | 33.254   | -1.9387 | Down | 1.06E-46  | 9.63E-46  |
| Unigene4671   | Potri.003G132900.1 | 3.4724  | 13.3119  | -1.9387 | Down | 1.06E-46  | 9.63E-46  |
| Unigene7534   | Potri.009G044200.3 | 2.1422  | 8.2135   | -1.9389 | Down | 2.54E-14  | 8.98E-14  |
| Unigene100937 | Potri.008G183400.1 | 3.73    | 14.3012  | -1.9389 | Down | 5.89E-40  | 4.62E-39  |
| Unigene35683  | Potri.005G231000.1 | 16.5415 | 63.4227  | -1.9389 | Down | 5.89E-40  | 4.62E-39  |
| Unigene79739  | Potri.008G170400.2 | 40.204  | 154.1531 | -1.939  | Down | 2.64E-100 | 5.67E-99  |



|               |                    |         |          |         |      |           |           |
|---------------|--------------------|---------|----------|---------|------|-----------|-----------|
| Unigene11261  | Potri.T097000.3    | 22.4754 | 86.1848  | -1.9391 | Down | 4.96E-125 | 1.40E-123 |
| Unigene27328  | Potri.006G198300.1 | 13.8025 | 52.9312  | -1.9392 | Down | 3.34E-33  | 2.21E-32  |
| Unigene89180  | Potri.005G124700.3 | 49.0559 | 188.1451 | -1.9393 | Down | 9.77E-174 | 4.22E-172 |
| Unigene41576  | Potri.018G109600.3 | 2.5202  | 9.6662   | -1.9394 | Down | 6.69E-11  | 2.01E-10  |
| Unigene116186 | Potri.014G090500.2 | 2.9984  | 11.4999  | -1.9394 | Down | 6.69E-11  | 2.01E-10  |
| Unigene21885  | Potri.T090100.1    | 7.6343  | 29.2836  | -1.9395 | Down | 1.19E-175 | 5.25E-174 |
| Unigene27260  | Potri.006G229300.9 | 54.477  | 208.9631 | -1.9395 | Down | 1.04E-209 | 5.69E-208 |
| Unigene10670  | Potri.003G103800.1 | 20.1665 | 77.3506  | -1.9395 | Down | 0         | 0         |
| Unigene27836  | Potri.001G242600.5 | 12.1181 | 46.4815  | -1.9395 | Down | 1.23E-54  | 1.32E-53  |
| Unigene37476  | Potri.T110800.1    | 9.654   | 37.0334  | -1.9396 | Down | 1.93E-26  | 1.06E-25  |
| Unigene17911  | Potri.009G124500.1 | 4.6342  | 17.7789  | -1.9398 | Down | 5.39E-17  | 2.14E-16  |
| Unigene38123  | Potri.005G001700.1 | 7.1129  | 27.2886  | -1.9398 | Down | 1.78E-32  | 1.16E-31  |
| Unigene34266  | Potri.002G006900.1 | 1.4279  | 5.4781   | -1.9398 | Down | 1.78E-32  | 1.16E-31  |
| Unigene48923  | Potri.006G249100.1 | 8.509   | 32.6505  | -1.94   | Down | 4.28E-29  | 2.53E-28  |
| Unigene45194  | Potri.003G092700.1 | 9.7192  | 37.2919  | -1.94   | Down | 2.56E-87  | 4.63E-86  |
| Unigene46654  | Potri.006G085400.2 | 20.2339 | 77.6552  | -1.9403 | Down | 3.06E-107 | 7.13E-106 |
| Unigene6858   | Potri.012G077400.4 | 5.8653  | 22.5116  | -1.9404 | Down | 1.03E-25  | 5.53E-25  |
| Unigene119571 | Potri.011G127600.1 | 0.8493  | 3.2598   | -1.9404 | Down | 1.16E-19  | 5.11E-19  |
| Unigene99916  | Potri.010G121500.2 | 1.445   | 5.5461   | -1.9404 | Down | 1.88E-07  | 4.56E-07  |
| Unigene33133  | Potri.008G002400.2 | 1.0753  | 4.1271   | -1.9404 | Down | 1.88E-07  | 4.56E-07  |
| Unigene4320   | Potri.007G027300.2 | 2.6762  | 10.2716  | -1.9404 | Down | 1.88E-07  | 4.56E-07  |
| Unigene12218  | Potri.003G021700.1 | 1.0415  | 3.9975   | -1.9404 | Down | 1.88E-07  | 4.56E-07  |
| Unigene15280  | Potri.002G027900.1 | 5.3604  | 20.5739  | -1.9404 | Down | 1.16E-19  | 5.11E-19  |
| Unigene71377  | Potri.008G153800.6 | 37.8508 | 145.3002 | -1.9406 | Down | 3.86E-79  | 6.26E-78  |
| Unigene4384   | Potri.015G055400.1 | 11.6909 | 44.8835  | -1.9408 | Down | 4.33E-49  | 4.15E-48  |
| Unigene35252  | Potri.014G159300.4 | 7.2014  | 27.6522  | -1.941  | Down | 2.92E-16  | 1.12E-15  |
| Unigene26849  | Potri.004G209800.8 | 13.027  | 50.0216  | -1.941  | Down | 1.02E-45  | 9.08E-45  |
| Unigene31795  | Potri.004G132300.4 | 6.9832  | 26.8143  | -1.941  | Down | 5.05E-236 | 3.22E-234 |
| Unigene26395  | Potri.002G025100.2 | 8.5021  | 32.6505  | -1.9412 | Down | 5.54E-25  | 2.90E-24  |
| Unigene48809  | Potri.010G154000.1 | 8.856   | 34.0115  | -1.9413 | Down | 1.13E-33  | 7.59E-33  |
| Unigene39278  | Potri.007G058400.1 | 6.921   | 26.5814  | -1.9414 | Down | 5.21E-51  | 5.19E-50  |
| Unigene31124  | Potri.006G126300.3 | 2.3504  | 9.0279   | -1.9415 | Down | 3.67E-10  | 1.06E-09  |
| Unigene25     | Potri.006G004800.1 | 4.6358  | 17.809   | -1.9417 | Down | 6.10E-59  | 7.11E-58  |
| Unigene8321   | Potri.004G205500.1 | 4.3882  | 16.8579  | -1.9417 | Down | 2.71E-30  | 1.66E-29  |
| Unigene17175  | Potri.010G246500.2 | 3.345   | 12.8511  | -1.9418 | Down | 1.36E-21  | 6.37E-21  |
| Unigene37844  | Potri.016G004200.2 | 16.0175 | 61.5449  | -1.942  | Down | 1.42E-55  | 1.56E-54  |
| Unigene89714  | Potri.009G100800.2 | 77.4841 | 297.7257 | -1.942  | Down | 2.15E-284 | 1.76E-282 |
| Unigene81767  | Potri.001G327300.1 | 16.4643 | 63.2603  | -1.942  | Down | 2.88E-44  | 2.49E-43  |
| Unigene61686  | Potri.019G098500.2 | 1.7847  | 6.8578   | -1.9421 | Down | 7.51E-13  | 2.48E-12  |

|               |                    |          |          |         |      |           |           |
|---------------|--------------------|----------|----------|---------|------|-----------|-----------|
| Unigene63196  | Potri.012G066600.3 | 2.2246   | 8.5483   | -1.9421 | Down | 7.51E-13  | 2.48E-12  |
| Unigene118246 | Potri.011G131400.1 | 2.6643   | 10.2377  | -1.9421 | Down | 7.51E-13  | 2.48E-12  |
| Unigene7850   | Potri.010G225300.3 | 4.2493   | 16.3284  | -1.9421 | Down | 1.35E-35  | 9.51E-35  |
| Unigene6381   | Potri.003G097600.1 | 21.8757  | 84.0631  | -1.9421 | Down | 1.93E-83  | 3.32E-82  |
| Unigene1110   | Potri.001G044000.4 | 3.3254   | 12.7781  | -1.9421 | Down | 2.97E-24  | 1.52E-23  |
| Unigene90375  | Potri.014G023800.1 | 28.4886  | 109.481  | -1.9422 | Down | 2.79E-111 | 6.85E-110 |
| Unigene11644  | Potri.003G046800.2 | 2.6525   | 10.1936  | -1.9422 | Down | 3.03E-38  | 2.28E-37  |
| Unigene21564  | Potri.002G189400.1 | 3.4716   | 13.3429  | -1.9424 | Down | 1.03E-82  | 1.74E-81  |
| Unigene48646  | Potri.001G160500.2 | 4.585    | 17.6227  | -1.9424 | Down | 1.58E-15  | 5.87E-15  |
| Unigene28605  | Potri.017G058600.2 | 4.9013   | 18.8396  | -1.9425 | Down | 3.46E-46  | 3.12E-45  |
| Unigene17414  | Potri.T054400.1    | 6.82     | 26.2156  | -1.9426 | Down | 3.23E-32  | 2.09E-31  |
| Unigene36557  | Potri.005G129500.3 | 18.0715  | 69.4674  | -1.9426 | Down | 7.83E-49  | 7.46E-48  |
| Unigene42383  | Potri.006G116000.1 | 5.1768   | 19.902   | -1.9428 | Down | 1.95E-282 | 1.58E-280 |
| Unigene10631  | Potri.001G164100.1 | 12.9348  | 49.7287  | -1.9428 | Down | 2.85E-257 | 2.05E-255 |
| Unigene87809  | Potri.011G119700.2 | 125.4516 | 482.3473 | -1.9429 | Down | 0         | 0         |
| Unigene52649  | Potri.010G185800.3 | 7.2606   | 27.9149  | -1.9429 | Down | 7.30E-21  | 3.34E-20  |
| Unigene30091  | Potri.009G055400.1 | 24.1588  | 92.8943  | -1.943  | Down | 7.93E-92  | 1.52E-90  |
| Unigene13308  | Potri.009G036900.1 | 14.9472  | 57.4708  | -1.943  | Down | 6.59E-84  | 1.14E-82  |
| Unigene105158 | Potri.006G061500.2 | 2.7076   | 10.4109  | -1.943  | Down | 1.59E-23  | 7.96E-23  |
| Unigene108311 | Potri.016G011100.1 | 22.2711  | 85.6374  | -1.9431 | Down | 4.16E-48  | 3.91E-47  |
| Unigene21614  | Potri.004G153100.1 | 4.2835   | 16.4717  | -1.9431 | Down | 9.42E-51  | 9.34E-50  |
| Unigene22972  | Potri.006G137900.2 | 16.1046  | 61.9325  | -1.9432 | Down | 4.85E-140 | 1.59E-138 |
| Unigene26217  | Potri.001G249100.1 | 22.1214  | 85.0674  | -1.9432 | Down | 2.14E-53  | 2.24E-52  |
| Unigene33842  | Potri.011G157500.4 | 12.9172  | 49.6786  | -1.9433 | Down | 5.07E-99  | 1.08E-97  |
| Unigene9800   | Potri.011G031000.2 | 20.8263  | 80.0945  | -1.9433 | Down | 9.64E-94  | 1.89E-92  |
| Unigene39673  | Potri.T034400.1    | 3.5426   | 13.6264  | -1.9435 | Down | 2.21E-47  | 2.05E-46  |
| Unigene37589  | Potri.008G059400.2 | 15.0974  | 58.0772  | -1.9437 | Down | 6.90E-66  | 9.11E-65  |
| Unigene31240  | Potri.008G016000.1 | 5.0205   | 19.3128  | -1.9437 | Down | 3.03E-63  | 3.82E-62  |
| Unigene20119  | Potri.019G085900.2 | 1.2583   | 4.8416   | -1.944  | Down | 1.05E-06  | 2.42E-06  |
| Unigene51327  | Potri.019G060700.1 | 1.3987   | 5.3819   | -1.944  | Down | 2.02E-09  | 5.57E-09  |
| Unigene31342  | Potri.017G133400.1 | 5.751    | 22.1284  | -1.944  | Down | 4.15E-28  | 2.39E-27  |
| Unigene53061  | Potri.014G144100.1 | 9.9465   | 38.2716  | -1.944  | Down | 8.55E-23  | 4.17E-22  |
| Unigene60441  | Potri.014G135800.2 | 3.5283   | 13.5761  | -1.944  | Down | 2.02E-09  | 5.57E-09  |
| Unigene43589  | Potri.012G083200.1 | 9.4392   | 36.3193  | -1.944  | Down | 1.60E-157 | 6.14E-156 |
| Unigene118274 | Potri.012G073700.1 | 1.2345   | 4.75     | -1.944  | Down | 1.05E-06  | 2.42E-06  |
| Unigene18657  | Potri.012G037300.1 | 1.981    | 7.6224   | -1.944  | Down | 8.54E-15  | 3.09E-14  |
| Unigene6713   | Potri.010G067500.1 | 2.2704   | 8.7359   | -1.944  | Down | 8.54E-15  | 3.09E-14  |
| Unigene9160   | Potri.010G041700.3 | 1.7642   | 6.788    | -1.944  | Down | 1.05E-06  | 2.42E-06  |
| Unigene101415 | Potri.009G120600.1 | 2.108    | 8.1112   | -1.944  | Down | 3.92E-20  | 1.76E-19  |

|               |                    |         |          |         |      |           |           |
|---------------|--------------------|---------|----------|---------|------|-----------|-----------|
| Unigene9387   | Potri.009G055300.1 | 1.8518  | 7.125    | -1.944  | Down | 1.05E-06  | 2.42E-06  |
| Unigene29499  | Potri.009G003700.1 | 1.0701  | 4.1173   | -1.944  | Down | 2.02E-09  | 5.57E-09  |
| Unigene8851   | Potri.008G114200.1 | 10.574  | 40.686   | -1.944  | Down | 4.59E-36  | 3.27E-35  |
| Unigene51231  | Potri.008G022100.1 | 4.4067  | 16.9558  | -1.944  | Down | 4.09E-12  | 1.30E-11  |
| Unigene38199  | Potri.006G145300.2 | 1.8387  | 7.0749   | -1.944  | Down | 4.09E-12  | 1.30E-11  |
| Unigene10911  | Potri.005G179500.4 | 3.5964  | 13.8379  | -1.944  | Down | 1.37E-54  | 1.47E-53  |
| Unigene37119  | Potri.005G114800.1 | 27.1661 | 104.528  | -1.944  | Down | 7.54E-97  | 1.55E-95  |
| Unigene49175  | Potri.003G076300.1 | 1.1726  | 4.5118   | -1.944  | Down | 2.02E-09  | 5.57E-09  |
| Unigene27913  | Potri.001G358300.1 | 27.5852 | 106.1403 | -1.944  | Down | 1.06E-228 | 6.47E-227 |
| Unigene117831 | Potri.011G096900.1 | 1.3493  | 5.1919   | -1.9441 | Down | 1.05E-06  | 2.42E-06  |
| Unigene21205  | Potri.011G121100.1 | 5.8518  | 22.5204  | -1.9443 | Down | 4.49E-156 | 1.69E-154 |
| Unigene44546  | Potri.001G140800.1 | 9.1195  | 35.0957  | -1.9443 | Down | 1.45E-85  | 2.56E-84  |
| Unigene10962  | Potri.009G046700.2 | 7.2785  | 28.0197  | -1.9447 | Down | 5.60E-123 | 1.55E-121 |
| Unigene32215  | Potri.004G209100.1 | 7.324   | 28.1937  | -1.9447 | Down | 1.88E-164 | 7.65E-163 |
| Unigene17140  | Potri.018G085900.1 | 6.6448  | 25.5811  | -1.9448 | Down | 4.92E-30  | 2.99E-29  |
| Unigene1542   | Potri.009G134300.8 | 12.6345 | 48.6426  | -1.9449 | Down | 1.65E-104 | 3.71E-103 |
| Unigene24457  | Potri.002G091200.1 | 3.2313  | 12.4408  | -1.9449 | Down | 3.39E-76  | 5.25E-75  |
| Unigene28764  | Potri.016G042000.1 | 5.836   | 22.4709  | -1.945  | Down | 3.33E-45  | 2.94E-44  |
| Unigene26464  | Potri.011G002400.1 | 6.9052  | 26.5869  | -1.945  | Down | 7.53E-48  | 7.04E-47  |
| Unigene21915  | Potri.001G305900.2 | 14.1923 | 54.6475  | -1.945  | Down | 2.00E-106 | 4.62E-105 |
| Unigene13197  | Potri.001G116100.1 | 5.3955  | 20.775   | -1.945  | Down | 3.33E-45  | 2.94E-44  |
| Unigene13818  | Potri.001G073400.1 | 4.3924  | 16.9119  | -1.945  | Down | 7.53E-48  | 7.04E-47  |
| Unigene45218  | Potri.019G093600.1 | 16.1998 | 62.3786  | -1.9451 | Down | 5.48E-63  | 6.86E-62  |
| Unigene62852  | Potri.011G138200.1 | 13.9312 | 53.6448  | -1.9451 | Down | 2.41E-60  | 2.88E-59  |
| Unigene72920  | Potri.010G169400.1 | 9.6372  | 37.1088  | -1.9451 | Down | 4.59E-22  | 2.18E-21  |
| Unigene45059  | Potri.008G040000.1 | 8.0166  | 30.8686  | -1.9451 | Down | 2.15E-83  | 3.69E-82  |
| Unigene8411   | Potri.006G087400.2 | 4.4902  | 17.2907  | -1.9451 | Down | 6.56E-40  | 5.13E-39  |
| Unigene107229 | Potri.006G094700.1 | 0.9729  | 3.7465   | -1.9452 | Down | 2.11E-19  | 9.20E-19  |
| Unigene41173  | Potri.003G061800.3 | 5.8436  | 22.5037  | -1.9452 | Down | 2.11E-19  | 9.20E-19  |
| Unigene19900  | Potri.018G102800.1 | 6.2047  | 23.896   | -1.9453 | Down | 1.31E-34  | 8.95E-34  |
| Unigene1495   | Potri.009G155200.1 | 34.4049 | 132.4953 | -1.9453 | Down | 6.38E-159 | 2.46E-157 |
| Unigene7131   | Potri.005G257700.1 | 18.9641 | 73.0332  | -1.9453 | Down | 3.44E-70  | 4.85E-69  |
| Unigene8873   | Potri.005G027200.1 | 3.5951  | 13.847   | -1.9455 | Down | 9.82E-17  | 3.86E-16  |
| Unigene7351   | Potri.011G050900.4 | 8.1696  | 31.4725  | -1.9458 | Down | 3.50E-39  | 2.69E-38  |
| Unigene1938   | Potri.006G119600.2 | 1.4549  | 5.605    | -1.9458 | Down | 4.63E-14  | 1.62E-13  |
| Unigene90585  | Potri.005G160700.1 | 24.77   | 95.4269  | -1.9458 | Down | 5.64E-99  | 1.20E-97  |
| Unigene49126  | Potri.002G155700.2 | 2.8962  | 11.1573  | -1.9458 | Down | 4.63E-14  | 1.62E-13  |
| Unigene9310   | Potri.008G114900.1 | 33.5696 | 129.3329 | -1.9459 | Down | 4.21E-131 | 1.26E-129 |
| Unigene28132  | Potri.005G207700.1 | 22.3797 | 86.2246  | -1.9459 | Down | 1.07E-93  | 2.10E-92  |

|               |                    |         |          |         |      |           |           |
|---------------|--------------------|---------|----------|---------|------|-----------|-----------|
| Unigene70298  | Potri.016G018400.2 | 2.7075  | 10.4324  | -1.946  | Down | 6.96E-34  | 4.69E-33  |
| Unigene188    | Potri.007G001200.1 | 43.7766 | 168.6705 | -1.946  | Down | 0         | 0         |
| Unigene13485  | Potri.004G197100.1 | 7.6062  | 29.3116  | -1.9462 | Down | 8.19E-61  | 9.87E-60  |
| Unigene94837  | Potri.001G196500.2 | 4.1093  | 15.8357  | -1.9462 | Down | 2.24E-11  | 6.88E-11  |
| Unigene35939  | Potri.003G182600.1 | 9.1954  | 35.4411  | -1.9464 | Down | 1.41E-28  | 8.19E-28  |
| Unigene7723   | Potri.007G145200.1 | 3.6329  | 14.0024  | -1.9465 | Down | 1.13E-45  | 1.01E-44  |
| Unigene41265  | Potri.011G136900.1 | 5.5032  | 21.2125  | -1.9466 | Down | 1.14E-18  | 4.82E-18  |
| Unigene1238   | Potri.002G112100.6 | 6.1566  | 23.7321  | -1.9466 | Down | 4.35E-60  | 5.18E-59  |
| Unigene32721  | Potri.003G084900.3 | 7.7095  | 29.7188  | -1.9467 | Down | 2.73E-67  | 3.68E-66  |
| Unigene45211  | Potri.019G081600.3 | 5.2823  | 20.3636  | -1.9468 | Down | 1.91E-57  | 2.17E-56  |
| Unigene22400  | Potri.014G137400.1 | 10.353  | 39.9155  | -1.9469 | Down | 6.52E-221 | 3.81E-219 |
| Unigene42453  | Potri.005G254000.1 | 8.2229  | 31.7052  | -1.947  | Down | 6.86E-170 | 2.89E-168 |
| Unigene21374  | Potri.005G051700.1 | 10.46   | 40.3297  | -1.947  | Down | 1.87E-208 | 1.02E-206 |
| Unigene39065  | Potri.002G023600.1 | 1.7413  | 6.714    | -1.947  | Down | 1.12E-08  | 2.94E-08  |
| Unigene67236  | Potri.008G062900.1 | 4.9044  | 18.9107  | -1.9471 | Down | 5.31E-16  | 2.02E-15  |
| Unigene22800  | Potri.007G018100.1 | 1.8218  | 7.0247   | -1.9471 | Down | 2.89E-23  | 1.43E-22  |
| Unigene37190  | Potri.004G027600.1 | 1.8898  | 7.2869   | -1.9471 | Down | 1.12E-08  | 2.94E-08  |
| Unigene11590  | Potri.016G132000.1 | 6.3522  | 24.495   | -1.9472 | Down | 6.35E-64  | 8.09E-63  |
| Unigene7426   | Potri.001G230000.1 | 9.0673  | 34.9678  | -1.9473 | Down | 4.43E-35  | 3.07E-34  |
| Unigene41645  | Potri.012G017200.3 | 8.3748  | 32.2998  | -1.9474 | Down | 7.24E-47  | 6.63E-46  |
| Unigene35026  | Potri.008G095700.4 | 6.2166  | 23.9772  | -1.9475 | Down | 1.23E-58  | 1.42E-57  |
| Unigene53164  | Potri.005G226000.1 | 12.802  | 49.3801  | -1.9476 | Down | 1.98E-32  | 1.29E-31  |
| Unigene22259  | Potri.T032700.2    | 10.6286 | 41.0001  | -1.9477 | Down | 5.13E-103 | 1.14E-101 |
| Unigene11968  | Potri.010G106800.3 | 23.8434 | 91.9851  | -1.9478 | Down | 1.12E-116 | 2.92E-115 |
| Unigene49669  | Potri.015G008200.1 | 2.3332  | 9.0018   | -1.9479 | Down | 8.91E-30  | 5.38E-29  |
| Unigene10328  | Potri.003G168000.1 | 3.4943  | 13.4826  | -1.948  | Down | 6.13E-18  | 2.53E-17  |
| Unigene3015   | Potri.002G215600.2 | 4.1248  | 15.9146  | -1.948  | Down | 3.85E-46  | 3.47E-45  |
| Unigene22781  | Potri.018G141000.1 | 3.8196  | 14.7388  | -1.9481 | Down | 6.33E-39  | 4.84E-38  |
| Unigene44303  | Potri.009G061000.4 | 17.1283 | 66.0941  | -1.9481 | Down | 3.67E-134 | 1.14E-132 |
| Unigene113978 | Potri.002G261000.3 | 13.8987 | 53.6312  | -1.9481 | Down | 6.33E-39  | 4.84E-38  |
| Unigene51790  | Potri.008G113900.3 | 17.0863 | 65.9326  | -1.9482 | Down | 7.86E-60  | 9.32E-59  |
| Unigene46745  | Potri.001G341400.1 | 8.6196  | 33.2625  | -1.9482 | Down | 1.55E-22  | 7.50E-22  |
| Unigene90349  | Potri.001G140300.1 | 45.5447 | 175.7574 | -1.9482 | Down | 9.38E-178 | 4.19E-176 |
| Unigene48353  | Potri.019G000200.1 | 12.4332 | 47.9823  | -1.9483 | Down | 4.02E-27  | 2.25E-26  |
| Unigene43072  | Potri.014G087300.2 | 2.9929  | 11.5502  | -1.9483 | Down | 1.26E-52  | 1.30E-51  |
| Unigene103165 | Potri.001G296100.2 | 5.3399  | 20.6078  | -1.9483 | Down | 4.02E-27  | 2.25E-26  |
| Unigene35282  | Potri.001G274500.1 | 8.0098  | 30.9117  | -1.9483 | Down | 4.02E-27  | 2.25E-26  |
| Unigene7727   | Potri.009G134300.8 | 6.3781  | 24.6156  | -1.9484 | Down | 9.80E-92  | 1.88E-90  |
| Unigene88767  | Potri.001G302000.1 | 8.6667  | 33.4483  | -1.9484 | Down | 1.06E-31  | 6.74E-31  |

|               |                    |         |          |         |      |           |           |
|---------------|--------------------|---------|----------|---------|------|-----------|-----------|
| Unigene17427  | Potri.009G059300.1 | 10.2723 | 39.648   | -1.9485 | Down | 7.58E-41  | 6.07E-40  |
| Unigene2605   | Potri.006G211800.1 | 2.8804  | 11.1179  | -1.9485 | Down | 1.52E-54  | 1.63E-53  |
| Unigene95915  | Potri.T140500.2    | 0.8759  | 3.3815   | -1.9488 | Down | 5.95E-06  | 1.29E-05  |
| Unigene2437   | Potri.018G118800.1 | 1.6509  | 6.3733   | -1.9488 | Down | 3.37E-38  | 2.53E-37  |
| Unigene4409   | Potri.015G017200.3 | 1.3088  | 5.0525   | -1.9488 | Down | 5.95E-06  | 1.29E-05  |
| Unigene8639   | Potri.014G152000.3 | 1.8886  | 7.291    | -1.9488 | Down | 5.95E-06  | 1.29E-05  |
| Unigene46102  | Potri.010G105600.1 | 2.1314  | 8.2284   | -1.9488 | Down | 5.95E-06  | 1.29E-05  |
| Unigene46197  | Potri.010G034400.1 | 2.2663  | 8.7492   | -1.9488 | Down | 1.22E-10  | 3.62E-10  |
| Unigene71548  | Potri.010G021400.3 | 6.6147  | 25.5364  | -1.9488 | Down | 2.87E-15  | 1.06E-14  |
| Unigene10635  | Potri.009G130400.1 | 9.0019  | 34.7523  | -1.9488 | Down | 9.22E-166 | 3.78E-164 |
| Unigene45191  | Potri.008G049700.2 | 6.0235  | 23.2542  | -1.9488 | Down | 5.04E-61  | 6.10E-60  |
| Unigene6564   | Potri.007G105900.1 | 1.5844  | 6.1167   | -1.9488 | Down | 1.22E-10  | 3.62E-10  |
| Unigene30005  | Potri.002G193400.1 | 2.6226  | 10.1248  | -1.9488 | Down | 2.87E-15  | 1.06E-14  |
| Unigene68476  | Potri.002G088100.2 | 1.6722  | 6.4557   | -1.9488 | Down | 2.87E-15  | 1.06E-14  |
| Unigene49312  | Potri.001G073800.5 | 1.1536  | 4.4535   | -1.9488 | Down | 5.95E-06  | 1.29E-05  |
| Unigene41522  | Potri.001G054900.1 | 1.2608  | 4.8675   | -1.9488 | Down | 5.95E-06  | 1.29E-05  |
| Unigene1546   | Potri.012G142400.4 | 1.5302  | 5.9076   | -1.9489 | Down | 1.22E-10  | 3.62E-10  |
| Unigene1988   | Potri.T155100.2    | 12.2051 | 47.1285  | -1.9491 | Down | 4.32E-83  | 7.37E-82  |
| Unigene35896  | Potri.005G229700.1 | 67.0728 | 258.9978 | -1.9491 | Down | 7.85E-232 | 4.86E-230 |
| Unigene41577  | Potri.005G176700.1 | 3.7619  | 14.5294  | -1.9494 | Down | 4.84E-42  | 3.98E-41  |
| Unigene21858  | Potri.017G112800.1 | 5.1654  | 19.9542  | -1.9497 | Down | 1.30E-70  | 1.85E-69  |
| Unigene85222  | Potri.006G225700.1 | 23.6057 | 91.1895  | -1.9497 | Down | 1.30E-70  | 1.85E-69  |
| Unigene35023  | Potri.001G306000.1 | 2.4151  | 9.3301   | -1.9498 | Down | 2.15E-39  | 1.66E-38  |
| Unigene29802  | Potri.006G127100.1 | 42.2818 | 163.3521 | -1.9499 | Down | 3.49E-121 | 9.54E-120 |
| Unigene17039  | Potri.017G028100.1 | 14.1016 | 54.4868  | -1.95   | Down | 5.18E-125 | 1.46E-123 |
| Unigene6821   | Potri.004G218300.3 | 7.7263  | 29.8519  | -1.95   | Down | 6.97E-46  | 6.24E-45  |
| Unigene103066 | Potri.002G061600.3 | 2.0722  | 8.0062   | -1.95   | Down | 9.78E-24  | 4.92E-23  |
| Unigene48316  | Potri.001G289800.3 | 3.5817  | 13.8386  | -1.95   | Down | 1.37E-12  | 4.48E-12  |
| Unigene45073  | Potri.001G089100.1 | 3.1551  | 12.1904  | -1.95   | Down | 5.71E-68  | 7.78E-67  |
| Unigene28763  | Potri.004G186300.1 | 2.911   | 11.2485  | -1.9501 | Down | 3.02E-30  | 1.85E-29  |
| Unigene42590  | Potri.004G034800.1 | 2.7393  | 10.5844  | -1.9501 | Down | 2.28E-52  | 2.34E-51  |
| Unigene43084  | Potri.013G047200.1 | 6.6337  | 25.6347  | -1.9502 | Down | 2.51E-65  | 3.27E-64  |
| Unigene26638  | Potri.006G061700.4 | 15.1558 | 58.5668  | -1.9502 | Down | 2.51E-65  | 3.27E-64  |
| Unigene38067  | Potri.009G081100.1 | 16.378  | 63.2945  | -1.9503 | Down | 9.10E-61  | 1.10E-59  |
| Unigene53673  | Potri.004G225800.5 | 7.1194  | 27.5127  | -1.9503 | Down | 3.84E-19  | 1.66E-18  |
| Unigene81937  | Potri.005G244700.1 | 69.3945 | 268.2129 | -1.9505 | Down | 2.21E-184 | 1.04E-182 |
| Unigene45100  | Potri.001G353100.1 | 26.3079 | 101.686  | -1.9506 | Down | 2.17E-279 | 1.73E-277 |
| Unigene30595  | Potri.019G103000.1 | 1.7762  | 6.8664   | -1.9508 | Down | 6.20E-08  | 1.56E-07  |
| Unigene119151 | Potri.014G136900.1 | 1.0621  | 4.106    | -1.9508 | Down | 6.20E-08  | 1.56E-07  |

|               |                    |         |          |         |      |           |           |
|---------------|--------------------|---------|----------|---------|------|-----------|-----------|
| Unigene51556  | Potri.013G095200.1 | 4.9154  | 19.0023  | -1.9508 | Down | 1.56E-14  | 5.56E-14  |
| Unigene52727  | Potri.012G035900.2 | 2.1136  | 8.171    | -1.9508 | Down | 6.20E-08  | 1.56E-07  |
| Unigene15853  | Potri.007G065400.2 | 3.0195  | 11.6728  | -1.9508 | Down | 6.20E-08  | 1.56E-07  |
| Unigene50354  | Potri.006G119200.1 | 3.1391  | 12.1351  | -1.9508 | Down | 4.48E-21  | 2.06E-20  |
| Unigene9957   | Potri.005G084400.2 | 1.6909  | 6.5368   | -1.9508 | Down | 6.20E-08  | 1.56E-07  |
| Unigene52536  | Potri.004G086100.1 | 3.9631  | 15.3206  | -1.9508 | Down | 1.56E-14  | 5.56E-14  |
| Unigene46582  | Potri.002G068200.1 | 1.3349  | 5.1606   | -1.9508 | Down | 6.20E-08  | 1.56E-07  |
| Unigene29690  | Potri.001G148600.3 | 8.1995  | 31.6978  | -1.9508 | Down | 4.48E-21  | 2.06E-20  |
| Unigene42009  | Potri.013G032300.2 | 10.657  | 41.2037  | -1.951  | Down | 5.35E-49  | 5.12E-48  |
| Unigene34427  | Potri.001G399000.1 | 4.0543  | 15.6761  | -1.951  | Down | 5.11E-36  | 3.63E-35  |
| Unigene43138  | Potri.015G058900.1 | 8.0693  | 31.2031  | -1.9512 | Down | 1.32E-93  | 2.59E-92  |
| Unigene43675  | Potri.008G127300.1 | 5.8185  | 22.5011  | -1.9513 | Down | 6.10E-38  | 4.56E-37  |
| Unigene50843  | Potri.015G028300.2 | 3.2041  | 12.3919  | -1.9514 | Down | 1.79E-16  | 6.94E-16  |
| Unigene2646   | Potri.005G113100.1 | 9.4197  | 36.4391  | -1.9517 | Down | 1.36E-58  | 1.58E-57  |
| Unigene112663 | Potri.003G098800.2 | 15.9855 | 61.836   | -1.9517 | Down | 8.75E-42  | 7.15E-41  |
| Unigene11054  | Potri.015G061600.1 | 1.2452  | 4.8173   | -1.9518 | Down | 2.07E-18  | 8.68E-18  |
| Unigene90457  | Potri.015G012800.5 | 2.1425  | 8.2889   | -1.9519 | Down | 6.72E-10  | 1.91E-09  |
| Unigene42846  | Potri.006G126000.1 | 12.6698 | 49.0175  | -1.9519 | Down | 8.08E-274 | 6.30E-272 |
| Unigene44990  | Potri.018G111900.2 | 12.784  | 49.4652  | -1.9521 | Down | 7.00E-127 | 2.02E-125 |
| Unigene108829 | Potri.006G134000.8 | 12.6108 | 48.7963  | -1.9521 | Down | 8.63E-29  | 5.07E-28  |
| Unigene10501  | Potri.003G080200.2 | 3.6478  | 14.1146  | -1.9521 | Down | 8.63E-29  | 5.07E-28  |
| Unigene11618  | Potri.001G236200.1 | 6.5981  | 25.5328  | -1.9522 | Down | 1.42E-76  | 2.22E-75  |
| Unigene23297  | Potri.018G150700.1 | 5.3587  | 20.7383  | -1.9523 | Down | 1.02E-30  | 6.35E-30  |
| Unigene20769  | Potri.001G287400.3 | 9.6421  | 37.3148  | -1.9523 | Down | 1.02E-30  | 6.35E-30  |
| Unigene11204  | Potri.011G060000.1 | 7.402   | 28.6464  | -1.9524 | Down | 4.25E-70  | 5.98E-69  |
| Unigene17219  | Potri.019G130500.3 | 17.2874 | 66.9079  | -1.9525 | Down | 5.15E-72  | 7.46E-71  |
| Unigene11673  | Potri.012G055800.4 | 3.7625  | 14.5628  | -1.9525 | Down | 1.22E-32  | 7.96E-32  |
| Unigene35021  | Potri.012G011700.2 | 9.5978  | 37.1468  | -1.9525 | Down | 2.54E-82  | 4.29E-81  |
| Unigene18853  | Potri.011G136300.1 | 5.0863  | 19.6867  | -1.9525 | Down | 1.22E-32  | 7.96E-32  |
| Unigene14567  | Potri.009G061800.1 | 14.7145 | 56.9598  | -1.9527 | Down | 1.45E-34  | 9.94E-34  |
| Unigene6673   | Potri.007G047500.1 | 11.584  | 44.8459  | -1.9528 | Down | 8.13E-94  | 1.60E-92  |
| Unigene27286  | Potri.002G191300.1 | 50.5443 | 195.6799 | -1.9529 | Down | 7.45E-200 | 3.88E-198 |
| Unigene13784  | Potri.019G048100.1 | 3.9827  | 15.4197  | -1.953  | Down | 1.98E-85  | 3.50E-84  |
| Unigene2038   | Potri.010G022700.1 | 2.7888  | 10.7974  | -1.953  | Down | 8.45E-14  | 2.92E-13  |
| Unigene43506  | Potri.009G012400.2 | 6.3828  | 24.7128  | -1.953  | Down | 1.46E-99  | 3.11E-98  |
| Unigene65361  | Potri.006G231000.1 | 3.8753  | 15.0042  | -1.953  | Down | 8.45E-14  | 2.92E-13  |
| Unigene48845  | Potri.004G226500.1 | 1.7868  | 6.9181   | -1.953  | Down | 8.45E-14  | 2.92E-13  |
| Unigene31515  | Potri.003G126700.1 | 2.4918  | 9.6478   | -1.953  | Down | 8.45E-14  | 2.92E-13  |
| Unigene7739   | Potri.017G029200.4 | 35.3461 | 136.8665 | -1.9531 | Down | 8.25E-223 | 4.86E-221 |

|               |                    |         |          |         |      |           |           |
|---------------|--------------------|---------|----------|---------|------|-----------|-----------|
| Unigene10788  | Potri.013G056600.1 | 11.8365 | 45.8316  | -1.9531 | Down | 6.85E-282 | 5.53E-280 |
| Unigene22394  | Potri.014G014500.1 | 6.5657  | 25.4304  | -1.9535 | Down | 4.34E-64  | 5.54E-63  |
| Unigene7516   | Potri.005G135500.1 | 10.9223 | 42.3033  | -1.9535 | Down | 3.12E-78  | 4.98E-77  |
| Unigene61226  | Potri.008G170300.1 | 3.6348  | 14.0788  | -1.9536 | Down | 1.11E-17  | 4.55E-17  |
| Unigene33906  | Potri.002G172100.1 | 14.6876 | 56.8922  | -1.9536 | Down | 5.56E-84  | 9.62E-83  |
| Unigene101515 | Potri.001G163900.1 | 5.5553  | 21.5176  | -1.9536 | Down | 1.11E-17  | 4.55E-17  |
| Unigene76836  | Potri.018G105300.3 | 22.2489 | 86.1867  | -1.9537 | Down | 8.98E-54  | 9.47E-53  |
| Unigene21498  | Potri.017G111400.4 | 20.5988 | 79.7912  | -1.9537 | Down | 6.07E-236 | 3.86E-234 |
| Unigene40146  | Potri.008G096000.1 | 2.4416  | 9.4586   | -1.9538 | Down | 1.30E-19  | 5.69E-19  |
| Unigene39557  | Potri.001G314300.1 | 6.6455  | 25.7441  | -1.9538 | Down | 1.21E-91  | 2.31E-90  |
| Unigene93147  | Potri.005G154500.1 | 34.665  | 134.2993 | -1.9539 | Down | 7.03E-193 | 3.50E-191 |
| Unigene1346   | Potri.013G076900.2 | 5.0774  | 19.6718  | -1.954  | Down | 1.51E-21  | 7.09E-21  |
| Unigene4071   | Potri.007G027500.1 | 24.5631 | 95.1703  | -1.954  | Down | 4.73E-105 | 1.07E-103 |
| Unigene49038  | Potri.015G109300.1 | 10.8197 | 41.9235  | -1.9541 | Down | 2.28E-45  | 2.01E-44  |
| Unigene16835  | Potri.002G169800.1 | 10.7561 | 41.6805  | -1.9542 | Down | 2.09E-25  | 1.11E-24  |
| Unigene44466  | Potri.014G089200.1 | 9.2583  | 35.8796  | -1.9543 | Down | 5.75E-55  | 6.20E-54  |
| Unigene31929  | Potri.006G220900.5 | 11.5471 | 44.7497  | -1.9543 | Down | 5.75E-55  | 6.20E-54  |
| Unigene38555  | Potri.011G154600.2 | 13.7019 | 53.1019  | -1.9544 | Down | 1.89E-84  | 3.31E-83  |
| Unigene32904  | Potri.010G158400.2 | 4.4392  | 17.2065  | -1.9546 | Down | 4.93E-35  | 3.41E-34  |
| Unigene4781   | Potri.010G030200.1 | 11.5541 | 44.7855  | -1.9546 | Down | 5.88E-37  | 4.29E-36  |
| Unigene26074  | Potri.007G004600.1 | 12.5192 | 48.5282  | -1.9547 | Down | 7.03E-39  | 5.37E-38  |
| Unigene27266  | Potri.004G195300.2 | 25.676  | 99.5285  | -1.9547 | Down | 4.30E-115 | 1.10E-113 |
| Unigene50171  | Potri.012G000900.1 | 5.6141  | 21.7651  | -1.9549 | Down | 7.02E-103 | 1.55E-101 |
| Unigene42646  | Potri.008G044600.1 | 7.6706  | 29.7388  | -1.9549 | Down | 1.54E-110 | 3.74E-109 |
| Unigene84309  | Potri.012G077700.4 | 19.7943 | 76.7436  | -1.955  | Down | 4.44E-58  | 5.10E-57  |
| Unigene604    | Potri.008G095700.2 | 5.7515  | 22.3019  | -1.9552 | Down | 1.40E-92  | 2.72E-91  |
| Unigene16130  | Potri.002G245700.2 | 0.7755  | 3.0076   | -1.9554 | Down | 3.41E-05  | 6.85E-05  |
| Unigene103189 | Potri.T062200.1    | 1.7268  | 6.6975   | -1.9555 | Down | 3.41E-05  | 6.85E-05  |
| Unigene76284  | Potri.019G130500.3 | 11.6043 | 45.0074  | -1.9555 | Down | 1.56E-28  | 9.09E-28  |
| Unigene35852  | Potri.019G025200.1 | 3.5456  | 13.7516  | -1.9555 | Down | 4.09E-11  | 1.24E-10  |
| Unigene42062  | Potri.018G040800.1 | 1.7322  | 6.7183   | -1.9555 | Down | 3.46E-07  | 8.25E-07  |
| Unigene95263  | Potri.017G140000.1 | 2.4866  | 9.6444   | -1.9555 | Down | 3.46E-07  | 8.25E-07  |
| Unigene52174  | Potri.017G101900.1 | 2.0198  | 7.8339   | -1.9555 | Down | 3.46E-07  | 8.25E-07  |
| Unigene66619  | Potri.016G118300.5 | 1.6602  | 6.4392   | -1.9555 | Down | 3.46E-07  | 8.25E-07  |
| Unigene36500  | Potri.015G012800.5 | 1.4182  | 5.5006   | -1.9555 | Down | 3.71E-09  | 1.01E-08  |
| Unigene31002  | Potri.014G012700.1 | 0.8144  | 3.1587   | -1.9555 | Down | 3.41E-05  | 6.85E-05  |
| Unigene40912  | Potri.013G157800.1 | 1.1303  | 4.3838   | -1.9555 | Down | 3.41E-05  | 6.85E-05  |
| Unigene46808  | Potri.012G080200.1 | 1.0099  | 3.917    | -1.9555 | Down | 3.46E-07  | 8.25E-07  |
| Unigene16847  | Potri.011G143900.1 | 1.8374  | 7.1264   | -1.9555 | Down | 4.59E-13  | 1.54E-12  |

|               |                    |          |          |         |      |           |           |
|---------------|--------------------|----------|----------|---------|------|-----------|-----------|
| Unigene114568 | Potri.010G110000.1 | 1.3713   | 5.3186   | -1.9555 | Down | 3.41E-05  | 6.85E-05  |
| Unigene20589  | Potri.010G097000.2 | 5.6946   | 22.0865  | -1.9555 | Down | 1.12E-24  | 5.80E-24  |
| Unigene27316  | Potri.010G066000.1 | 6.9359   | 26.9008  | -1.9555 | Down | 6.97E-19  | 2.98E-18  |
| Unigene25778  | Potri.010G025300.1 | 3.3909   | 13.1515  | -1.9555 | Down | 3.71E-09  | 1.01E-08  |
| Unigene33332  | Potri.009G158400.2 | 2.7992   | 10.8568  | -1.9555 | Down | 6.02E-17  | 2.38E-16  |
| Unigene7270   | Potri.009G126200.2 | 3.795    | 14.719   | -1.9555 | Down | 5.23E-15  | 1.91E-14  |
| Unigene6544   | Potri.009G100800.2 | 5.5838   | 21.6567  | -1.9555 | Down | 8.13E-21  | 3.72E-20  |
| Unigene36647  | Potri.007G092700.3 | 1.078    | 4.1811   | -1.9555 | Down | 3.41E-05  | 6.85E-05  |
| Unigene58664  | Potri.007G075200.1 | 1.4155   | 5.4902   | -1.9555 | Down | 3.71E-09  | 1.01E-08  |
| Unigene48058  | Potri.006G276600.3 | 1.0938   | 4.2424   | -1.9555 | Down | 3.41E-05  | 6.85E-05  |
| Unigene49207  | Potri.006G223000.1 | 2.0607   | 7.9926   | -1.9555 | Down | 6.02E-17  | 2.38E-16  |
| Unigene15940  | Potri.005G172400.1 | 10.6137  | 41.1653  | -1.9555 | Down | 1.56E-28  | 9.10E-28  |
| Unigene40502  | Potri.005G090100.2 | 1.397    | 5.4182   | -1.9555 | Down | 3.41E-05  | 6.85E-05  |
| Unigene103681 | Potri.005G008300.2 | 0.886    | 3.4363   | -1.9555 | Down | 3.41E-05  | 6.85E-05  |
| Unigene115973 | Potri.004G028800.2 | 1.227    | 4.7588   | -1.9555 | Down | 3.41E-05  | 6.85E-05  |
| Unigene11869  | Potri.004G005900.1 | 2.6613   | 10.322   | -1.9555 | Down | 1.32E-26  | 7.26E-26  |
| Unigene115970 | Potri.003G182800.1 | 1.227    | 4.7588   | -1.9555 | Down | 3.41E-05  | 6.85E-05  |
| Unigene28560  | Potri.003G031700.1 | 5.8009   | 22.4987  | -1.9555 | Down | 4.48E-40  | 3.52E-39  |
| Unigene19355  | Potri.002G255500.1 | 1.3157   | 5.1029   | -1.9555 | Down | 3.71E-09  | 1.01E-08  |
| Unigene110428 | Potri.002G123500.1 | 1.6726   | 6.4873   | -1.9555 | Down | 3.41E-05  | 6.85E-05  |
| Unigene52847  | Potri.002G088600.1 | 2.1941   | 8.5098   | -1.9555 | Down | 3.46E-07  | 8.25E-07  |
| Unigene6124   | Potri.001G422000.2 | 1.4022   | 5.4386   | -1.9555 | Down | 3.41E-05  | 6.85E-05  |
| Unigene108559 | Potri.001G397600.2 | 2.6899   | 10.4327  | -1.9555 | Down | 3.46E-07  | 8.25E-07  |
| Unigene52870  | Potri.001G277600.1 | 6.6777   | 25.8994  | -1.9555 | Down | 1.56E-28  | 9.10E-28  |
| Unigene547    | Potri.001G212600.4 | 9.7004   | 37.6231  | -1.9555 | Down | 3.44E-61  | 4.17E-60  |
| Unigene20615  | Potri.001G022400.1 | 1.984    | 7.695    | -1.9555 | Down | 3.46E-07  | 8.25E-07  |
| Unigene36591  | Potri.019G087000.2 | 1.0477   | 4.0637   | -1.9556 | Down | 3.41E-05  | 6.85E-05  |
| Unigene104787 | Potri.007G036100.2 | 0.9031   | 3.5028   | -1.9556 | Down | 3.41E-05  | 6.85E-05  |
| Unigene87084  | Potri.005G087100.2 | 36.9397  | 143.2971 | -1.9558 | Down | 7.40E-120 | 1.99E-118 |
| Unigene25437  | Potri.001G092000.1 | 28.3643  | 110.0336 | -1.9558 | Down | 1.87E-106 | 4.32E-105 |
| Unigene77703  | Potri.005G129500.3 | 26.2061  | 101.6755 | -1.956  | Down | 2.66E-64  | 3.42E-63  |
| Unigene81901  | Potri.002G055600.4 | 22.9312  | 88.9704  | -1.956  | Down | 2.20E-62  | 2.73E-61  |
| Unigene17124  | Potri.009G124800.3 | 2.9935   | 11.616   | -1.9562 | Down | 4.12E-45  | 3.62E-44  |
| Unigene36248  | Potri.007G105700.1 | 52.9337  | 205.4051 | -1.9562 | Down | 0         | 0         |
| Unigene30099  | Potri.013G079000.2 | 14.3335  | 55.6276  | -1.9564 | Down | 1.67E-35  | 1.17E-34  |
| Unigene878    | Potri.010G180800.1 | 5.5311   | 21.4678  | -1.9565 | Down | 1.62E-121 | 4.45E-120 |
| Unigene38505  | Potri.005G108800.1 | 11.9686  | 46.4559  | -1.9566 | Down | 8.02E-58  | 9.16E-57  |
| Unigene84715  | Potri.001G084000.2 | 155.0387 | 601.777  | -1.9566 | Down | 0         | 0         |
| Unigene2585   | Potri.012G038400.1 | 3.3426   | 12.9759  | -1.9568 | Down | 7.07E-26  | 3.80E-25  |



|               |                    |         |          |         |      |           |           |
|---------------|--------------------|---------|----------|---------|------|-----------|-----------|
| Unigene48679  | Potri.008G095300.1 | 19.6368 | 76.2288  | -1.9568 | Down | 2.35E-74  | 3.54E-73  |
| Unigene7840   | Potri.007G090300.1 | 9.2062  | 35.7377  | -1.9568 | Down | 1.54E-98  | 3.25E-97  |
| Unigene111442 | Potri.010G216100.3 | 9.2849  | 36.046   | -1.9569 | Down | 6.00E-24  | 3.04E-23  |
| Unigene21115  | Potri.008G055400.1 | 10.5788 | 41.0695  | -1.9569 | Down | 2.63E-46  | 2.37E-45  |
| Unigene64178  | Potri.012G040700.1 | 7.0351  | 27.3145  | -1.957  | Down | 5.11E-22  | 2.43E-21  |
| Unigene39298  | Potri.002G107400.7 | 2.1442  | 8.3258   | -1.9571 | Down | 4.37E-20  | 1.95E-19  |
| Unigene25967  | Potri.002G261000.3 | 85.072  | 330.3345 | -1.9572 | Down | 0         | 0         |
| Unigene32700  | Potri.012G073700.1 | 11.1171 | 43.1702  | -1.9573 | Down | 4.35E-125 | 1.23E-123 |
| Unigene34007  | Potri.010G091200.2 | 4.5265  | 17.5787  | -1.9574 | Down | 2.43E-51  | 2.44E-50  |
| Unigene31802  | Potri.006G137900.1 | 3.7338  | 14.501   | -1.9574 | Down | 1.33E-113 | 3.35E-112 |
| Unigene88823  | Potri.016G040200.4 | 8.86    | 34.4108  | -1.9575 | Down | 7.48E-33  | 4.91E-32  |
| Unigene109811 | Potri.014G051500.3 | 13.859  | 53.8261  | -1.9575 | Down | 7.48E-33  | 4.91E-32  |
| Unigene25573  | Potri.T085200.2    | 12.1664 | 47.2564  | -1.9576 | Down | 6.29E-31  | 3.91E-30  |
| Unigene1079   | Potri.009G041900.1 | 7.568   | 29.3956  | -1.9576 | Down | 5.01E-104 | 1.12E-102 |
| Unigene81180  | Potri.008G203100.1 | 37.0047 | 143.7455 | -1.9577 | Down | 2.79E-98  | 5.84E-97  |
| Unigene92278  | Potri.T077100.1    | 2.6414  | 10.2619  | -1.9579 | Down | 2.84E-14  | 1.00E-13  |
| Unigene35344  | Potri.009G097000.2 | 4.0758  | 15.8346  | -1.9579 | Down | 2.84E-14  | 1.00E-13  |
| Unigene43654  | Potri.003G132900.1 | 1.5215  | 5.9111   | -1.9579 | Down | 2.84E-14  | 1.00E-13  |
| Unigene50227  | Potri.008G045200.5 | 6.1841  | 24.0272  | -1.958  | Down | 1.29E-50  | 1.28E-49  |
| Unigene32969  | Potri.001G448900.1 | 4.4438  | 17.2653  | -1.958  | Down | 1.29E-50  | 1.28E-49  |
| Unigene91238  | Potri.010G254200.1 | 50.731  | 197.1128 | -1.9581 | Down | 1.23E-216 | 7.01E-215 |
| Unigene39646  | Potri.010G237800.3 | 3.3509  | 13.0202  | -1.9581 | Down | 3.79E-25  | 1.99E-24  |
| Unigene28627  | Potri.004G097300.1 | 3.7117  | 14.4221  | -1.9581 | Down | 3.79E-25  | 1.99E-24  |
| Unigene102909 | Potri.008G195300.1 | 1.9305  | 7.5022   | -1.9583 | Down | 2.50E-12  | 8.07E-12  |
| Unigene20677  | Potri.008G130600.1 | 2.7198  | 10.5695  | -1.9583 | Down | 2.50E-12  | 8.07E-12  |
| Unigene29628  | Potri.001G379700.2 | 1.3006  | 5.0544   | -1.9584 | Down | 2.50E-12  | 8.07E-12  |
| Unigene35109  | Potri.001G205500.1 | 5.585   | 21.7043  | -1.9584 | Down | 7.44E-45  | 6.50E-44  |
| Unigene22315  | Potri.019G028600.1 | 35.8013 | 139.1402 | -1.9585 | Down | 0         | 0         |
| Unigene4765   | Potri.005G232900.1 | 5.6514  | 21.9643  | -1.9585 | Down | 9.96E-54  | 1.05E-52  |
| Unigene27600  | Potri.015G033400.1 | 5.3889  | 20.9464  | -1.9586 | Down | 2.74E-21  | 1.28E-20  |
| Unigene22846  | Potri.001G123800.3 | 3.6096  | 14.0305  | -1.9587 | Down | 2.74E-21  | 1.28E-20  |
| Unigene7008   | Potri.003G123300.3 | 23.5288 | 91.4729  | -1.9589 | Down | 3.93E-101 | 8.53E-100 |
| Unigene23386  | Potri.019G056800.1 | 1.6435  | 6.3896   | -1.959  | Down | 2.35E-19  | 1.02E-18  |
| Unigene11727  | Potri.018G123400.1 | 3.0595  | 11.8951  | -1.959  | Down | 4.75E-46  | 4.27E-45  |
| Unigene5870   | Potri.012G102800.1 | 3.5895  | 13.9555  | -1.959  | Down | 2.24E-10  | 6.53E-10  |
| Unigene98828  | Potri.008G200400.1 | 1.6341  | 6.3531   | -1.959  | Down | 2.24E-10  | 6.53E-10  |
| Unigene15631  | Potri.003G157700.2 | 8.1445  | 31.6649  | -1.959  | Down | 2.83E-28  | 1.63E-27  |
| Unigene86353  | Potri.002G119300.1 | 13.6765 | 53.1784  | -1.9591 | Down | 3.96E-44  | 3.40E-43  |
| Unigene54312  | Potri.006G106600.1 | 5.9088  | 22.9772  | -1.9593 | Down | 2.39E-26  | 1.30E-25  |

|               |                    |         |          |         |      |           |           |
|---------------|--------------------|---------|----------|---------|------|-----------|-----------|
| Unigene6456   | Potri.003G177000.1 | 4.3945  | 17.0903  | -1.9594 | Down | 2.03E-17  | 8.18E-17  |
| Unigene82789  | Potri.001G157300.1 | 17.3782 | 67.5842  | -1.9594 | Down | 3.65E-49  | 3.50E-48  |
| Unigene2324   | Potri.014G070600.1 | 17.2479 | 67.0974  | -1.9598 | Down | 4.64E-80  | 7.63E-79  |
| Unigene96597  | Potri.014G084500.1 | 1.6336  | 6.3553   | -1.9599 | Down | 2.05E-08  | 5.33E-08  |
| Unigene31234  | Potri.012G000400.1 | 2.0595  | 8.0124   | -1.9599 | Down | 2.05E-08  | 5.33E-08  |
| Unigene16456  | Potri.004G173800.1 | 2.2568  | 8.78     | -1.9599 | Down | 1.76E-15  | 6.54E-15  |
| Unigene3690   | Potri.001G389200.1 | 8.571   | 33.3452  | -1.9599 | Down | 1.73E-22  | 8.33E-22  |
| Unigene36679  | Potri.013G069700.1 | 8.0246  | 31.2196  | -1.96   | Down | 1.73E-22  | 8.33E-22  |
| Unigene37729  | Potri.012G034800.1 | 6.6805  | 25.9904  | -1.96   | Down | 1.76E-15  | 6.54E-15  |
| Unigene8588   | Potri.011G021600.1 | 4.0143  | 15.6176  | -1.96   | Down | 1.79E-29  | 1.07E-28  |
| Unigene92572  | Potri.005G242300.1 | 1.3786  | 5.3635   | -1.96   | Down | 2.05E-08  | 5.33E-08  |
| Unigene39539  | Potri.010G160200.5 | 4.1977  | 16.3325  | -1.9601 | Down | 2.77E-69  | 3.85E-68  |
| Unigene16913  | Potri.008G045600.1 | 32.353  | 125.8848 | -1.9601 | Down | 3.95E-95  | 7.92E-94  |
| Unigene50667  | Potri.008G025900.3 | 12.2983 | 47.8561  | -1.9602 | Down | 2.02E-60  | 2.42E-59  |
| Unigene42333  | Potri.016G022000.1 | 13.254  | 51.5775  | -1.9603 | Down | 2.15E-72  | 3.14E-71  |
| Unigene44948  | Potri.009G112600.1 | 5.4684  | 21.2797  | -1.9603 | Down | 1.51E-27  | 8.56E-27  |
| Unigene33011  | Potri.003G149300.2 | 6.1398  | 23.8961  | -1.9605 | Down | 1.57E-63  | 1.98E-62  |
| Unigene42400  | Potri.002G068400.1 | 9.5031  | 36.9857  | -1.9605 | Down | 1.57E-63  | 1.98E-62  |
| Unigene7045   | Potri.015G086200.1 | 7.7864  | 30.308   | -1.9607 | Down | 1.28E-25  | 6.83E-25  |
| Unigene60930  | Potri.011G077100.1 | 4.7195  | 18.3704  | -1.9607 | Down | 1.54E-13  | 5.26E-13  |
| Unigene5084   | Potri.008G120100.2 | 4.984   | 19.3998  | -1.9607 | Down | 1.54E-13  | 5.26E-13  |
| Unigene46045  | Potri.010G040600.1 | 2.7025  | 10.522   | -1.961  | Down | 9.34E-41  | 7.46E-40  |
| Unigene24082  | Potri.001G374900.1 | 27.5914 | 107.4227 | -1.961  | Down | 1.97E-293 | 1.69E-291 |
| Unigene51482  | Potri.001G024100.1 | 10.5883 | 41.2222  | -1.961  | Down | 1.03E-35  | 7.25E-35  |
| Unigene109407 | Potri.T010000.1    | 9.9349  | 38.683   | -1.9611 | Down | 1.09E-23  | 5.46E-23  |
| Unigene17811  | Potri.001G107500.1 | 13.9415 | 54.283   | -1.9611 | Down | 8.58E-46  | 7.67E-45  |
| Unigene48912  | Potri.010G036200.1 | 9.3814  | 36.532   | -1.9613 | Down | 8.60E-34  | 5.78E-33  |
| Unigene10739  | Potri.008G171400.1 | 9.2032  | 35.8395  | -1.9613 | Down | 4.12E-155 | 1.54E-153 |
| Unigene22113  | Potri.T061100.1    | 14.3407 | 55.8556  | -1.9616 | Down | 2.00E-164 | 8.14E-163 |
| Unigene3660   | Potri.013G065300.1 | 0.8881  | 3.4592   | -1.9616 | Down | 1.95E-06  | 4.38E-06  |
| Unigene37291  | Potri.010G216100.3 | 4.1268  | 16.0741  | -1.9616 | Down | 1.37E-11  | 4.25E-11  |
| Unigene103742 | Potri.009G130000.1 | 1.527   | 5.9476   | -1.9616 | Down | 5.48E-47  | 5.03E-46  |
| Unigene115226 | Potri.006G212400.1 | 1.7014  | 6.627    | -1.9616 | Down | 1.95E-06  | 4.38E-06  |
| Unigene109630 | Potri.006G180800.1 | 2.2449  | 8.744    | -1.9616 | Down | 1.95E-06  | 4.38E-06  |
| Unigene74598  | Potri.005G190500.1 | 2.2449  | 8.744    | -1.9616 | Down | 1.95E-06  | 4.38E-06  |
| Unigene50535  | Potri.005G140500.3 | 2.7669  | 10.7772  | -1.9616 | Down | 9.27E-22  | 4.37E-21  |
| Unigene71997  | Potri.018G140300.1 | 2.3653  | 9.2132   | -1.9617 | Down | 1.95E-06  | 4.38E-06  |
| Unigene40326  | Potri.008G113700.2 | 0.7988  | 3.1115   | -1.9617 | Down | 1.95E-06  | 4.38E-06  |
| Unigene119303 | Potri.007G056800.1 | 2.1647  | 8.4317   | -1.9617 | Down | 1.09E-16  | 4.29E-16  |

|               |                    |         |          |         |      |           |           |
|---------------|--------------------|---------|----------|---------|------|-----------|-----------|
| Unigene25559  | Potri.006G205900.1 | 1.0295  | 4.01     | -1.9617 | Down | 1.95E-06  | 4.38E-06  |
| Unigene52951  | Potri.001G040200.2 | 1.5393  | 5.9959   | -1.9617 | Down | 1.95E-06  | 4.38E-06  |
| Unigene3228   | Potri.001G326500.1 | 6.1509  | 23.961   | -1.9618 | Down | 2.85E-80  | 4.70E-79  |
| Unigene13880  | Potri.001G019000.1 | 1.9394  | 7.5562   | -1.9621 | Down | 6.08E-30  | 3.68E-29  |
| Unigene14964  | Potri.019G066500.1 | 7.6906  | 29.9663  | -1.9622 | Down | 6.86E-25  | 3.58E-24  |
| Unigene22564  | Potri.019G033500.1 | 12.1629 | 47.3923  | -1.9622 | Down | 3.50E-48  | 3.30E-47  |
| Unigene45454  | Potri.001G408200.6 | 22.2557 | 86.7198  | -1.9622 | Down | 8.66E-113 | 2.15E-111 |
| Unigene33075  | Potri.005G066400.1 | 2.8929  | 11.2731  | -1.9623 | Down | 7.93E-20  | 3.51E-19  |
| Unigene48091  | Potri.002G064900.1 | 6.1012  | 23.7755  | -1.9623 | Down | 2.51E-56  | 2.78E-55  |
| Unigene35525  | Potri.018G127800.3 | 11.847  | 46.1681  | -1.9624 | Down | 2.70E-51  | 2.70E-50  |
| Unigene3440   | Potri.011G095800.2 | 8.0782  | 31.482   | -1.9624 | Down | 4.59E-33  | 3.03E-32  |
| Unigene119222 | Potri.001G093500.1 | 2.0098  | 7.8332   | -1.9625 | Down | 9.53E-15  | 3.43E-14  |
| Unigene13698  | Potri.005G231000.1 | 34.6353 | 134.9919 | -1.9626 | Down | 9.31E-173 | 4.00E-171 |
| Unigene117583 | Potri.001G352000.2 | 3.4183  | 13.3229  | -1.9626 | Down | 9.53E-15  | 3.43E-14  |
| Unigene42951  | Potri.013G095300.1 | 2.9094  | 11.3406  | -1.9627 | Down | 3.48E-36  | 2.49E-35  |
| Unigene40395  | Potri.002G184200.2 | 17.4594 | 68.0583  | -1.9628 | Down | 2.43E-44  | 2.10E-43  |
| Unigene22789  | Potri.002G172800.1 | 26.1147 | 101.7989 | -1.9628 | Down | 2.06E-201 | 1.08E-199 |
| Unigene20806  | Potri.009G119300.1 | 10.8197 | 42.1791  | -1.9629 | Down | 3.86E-31  | 2.42E-30  |
| Unigene46681  | Potri.002G002400.1 | 7.2131  | 28.1194  | -1.9629 | Down | 3.86E-31  | 2.42E-30  |
| Unigene30029  | Potri.001G024100.1 | 45.1064 | 175.8492 | -1.9629 | Down | 1.42E-122 | 3.93E-121 |
| Unigene11680  | Potri.014G127900.1 | 7.8794  | 30.7191  | -1.963  | Down | 1.33E-55  | 1.46E-54  |
| Unigene24296  | Potri.003G124600.1 | 3.1963  | 12.4612  | -1.963  | Down | 1.86E-47  | 1.73E-46  |
| Unigene395    | Potri.002G243600.3 | 5.2689  | 20.5418  | -1.963  | Down | 1.33E-55  | 1.46E-54  |
| Unigene20083  | Potri.010G227100.3 | 14.0501 | 54.7816  | -1.9631 | Down | 2.92E-34  | 1.98E-33  |
| Unigene34942  | Potri.010G160200.7 | 1.1622  | 4.5313   | -1.9631 | Down | 1.23E-09  | 3.44E-09  |
| Unigene91178  | Potri.008G170300.1 | 5.7454  | 22.4015  | -1.9631 | Down | 4.34E-26  | 2.35E-25  |
| Unigene44490  | Potri.008G040500.1 | 1.8829  | 7.3415   | -1.9631 | Down | 1.23E-09  | 3.44E-09  |
| Unigene5003   | Potri.006G067200.1 | 72.2751 | 281.7972 | -1.9631 | Down | 1.79E-242 | 1.19E-240 |
| Unigene3190   | Potri.003G083100.1 | 4.2845  | 16.7055  | -1.9631 | Down | 2.96E-91  | 5.64E-90  |
| Unigene47170  | Potri.002G120100.1 | 16.3186 | 63.6266  | -1.9631 | Down | 1.43E-50  | 1.41E-49  |
| Unigene119544 | Potri.006G051300.1 | 4.2719  | 16.658   | -1.9633 | Down | 1.10E-53  | 1.16E-52  |
| Unigene37862  | Potri.010G023100.2 | 5.2461  | 20.46    | -1.9635 | Down | 1.69E-40  | 1.34E-39  |
| Unigene27800  | Potri.008G113900.3 | 4.6163  | 18.0038  | -1.9635 | Down | 4.98E-21  | 2.29E-20  |
| Unigene23510  | Potri.011G087100.1 | 8.5313  | 33.2739  | -1.9636 | Down | 9.16E-52  | 9.29E-51  |
| Unigene17972  | Potri.002G178200.1 | 3.3146  | 12.928   | -1.9636 | Down | 2.45E-32  | 1.59E-31  |
| Unigene106428 | Potri.019G062200.1 | 0.9539  | 3.7209   | -1.9637 | Down | 8.38E-13  | 2.76E-12  |
| Unigene119394 | Potri.007G070600.1 | 1.4717  | 5.7407   | -1.9637 | Down | 8.38E-13  | 2.76E-12  |
| Unigene107154 | Potri.002G086500.1 | 1.654   | 6.4518   | -1.9637 | Down | 8.38E-13  | 2.76E-12  |
| Unigene85720  | Potri.012G037500.2 | 22.2264 | 86.701   | -1.9638 | Down | 3.07E-69  | 4.26E-68  |

|               |                    |         |          |         |      |           |           |
|---------------|--------------------|---------|----------|---------|------|-----------|-----------|
| Unigene53080  | Potri.012G017500.1 | 5.0311  | 19.6253  | -1.9638 | Down | 8.38E-13  | 2.76E-12  |
| Unigene35543  | Potri.006G116500.5 | 5.2509  | 20.4828  | -1.9638 | Down | 8.38E-13  | 2.76E-12  |
| Unigene48506  | Potri.002G134400.1 | 3.7689  | 14.7019  | -1.9638 | Down | 8.38E-13  | 2.76E-12  |
| Unigene53700  | Potri.001G252500.2 | 8.7586  | 34.1656  | -1.9638 | Down | 3.68E-24  | 1.88E-23  |
| Unigene16614  | Potri.T087500.1    | 16.2857 | 63.5322  | -1.9639 | Down | 7.61E-50  | 7.41E-49  |
| Unigene63704  | Potri.010G250600.1 | 4.9384  | 19.2663  | -1.964  | Down | 5.86E-53  | 6.08E-52  |
| Unigene23792  | Potri.002G067900.1 | 3.2824  | 12.8057  | -1.964  | Down | 2.74E-27  | 1.54E-26  |
| Unigene6704   | Potri.016G040200.4 | 10.0248 | 39.1149  | -1.9641 | Down | 8.24E-45  | 7.20E-44  |
| Unigene42895  | Potri.013G143100.1 | 7.0495  | 27.5059  | -1.9641 | Down | 3.13E-188 | 1.51E-186 |
| Unigene3049   | Potri.008G053000.2 | 1.7514  | 6.8335   | -1.9641 | Down | 5.91E-16  | 2.24E-15  |
| Unigene49978  | Potri.001G456300.1 | 9.2986  | 36.2799  | -1.9641 | Down | 1.97E-70  | 2.79E-69  |
| Unigene18297  | Potri.006G114900.1 | 3.0971  | 12.0844  | -1.9642 | Down | 1.53E-73  | 2.28E-72  |
| Unigene20392  | Potri.005G179600.5 | 49.6132 | 193.5845 | -1.9642 | Down | 1.12E-162 | 4.47E-161 |
| Unigene43317  | Potri.018G109600.2 | 6.7576  | 26.3697  | -1.9643 | Down | 4.87E-51  | 4.85E-50  |
| Unigene4034   | Potri.015G054700.1 | 7.8434  | 30.6084  | -1.9644 | Down | 4.27E-19  | 1.84E-18  |
| Unigene48948  | Potri.015G004600.8 | 5.1885  | 20.2479  | -1.9644 | Down | 1.18E-36  | 8.54E-36  |
| Unigene2465   | Potri.009G120700.2 | 3.4663  | 13.5275  | -1.9644 | Down | 9.83E-75  | 1.49E-73  |
| Unigene17090  | Potri.010G082100.1 | 6.971   | 27.2128  | -1.9648 | Down | 1.31E-31  | 8.30E-31  |
| Unigene12288  | Potri.007G044100.1 | 25.9121 | 101.1515 | -1.9648 | Down | 2.33E-88  | 4.27E-87  |
| Unigene6279   | Potri.004G065800.8 | 16.5184 | 64.4877  | -1.965  | Down | 7.51E-38  | 5.60E-37  |
| Unigene17655  | Potri.013G151600.2 | 17.6943 | 69.085   | -1.9651 | Down | 7.14E-99  | 1.51E-97  |
| Unigene49149  | Potri.010G199300.1 | 10.6151 | 41.4489  | -1.9652 | Down | 4.30E-72  | 6.25E-71  |
| Unigene117533 | Potri.012G099100.1 | 0.8131  | 3.1754   | -1.9654 | Down | 1.98E-04  | 3.69E-04  |
| Unigene54602  | Potri.008G171700.5 | 0.8289  | 3.2371   | -1.9654 | Down | 1.98E-04  | 3.69E-04  |
| Unigene95646  | Potri.004G042100.5 | 1.1687  | 4.5641   | -1.9654 | Down | 7.47E-11  | 2.24E-10  |
| Unigene21198  | Potri.003G176500.1 | 7.0709  | 27.6136  | -1.9654 | Down | 1.93E-230 | 1.19E-228 |
| Unigene12802  | Potri.T153900.2    | 3.2028  | 12.5085  | -1.9655 | Down | 2.68E-20  | 1.20E-19  |
| Unigene114210 | Potri.T134500.1    | 1.1218  | 4.3811   | -1.9655 | Down | 1.98E-04  | 3.69E-04  |
| Unigene95494  | Potri.019G052100.1 | 1.4009  | 5.4712   | -1.9655 | Down | 1.98E-04  | 3.69E-04  |
| Unigene19693  | Potri.019G043300.8 | 1.3381  | 5.2259   | -1.9655 | Down | 1.98E-04  | 3.69E-04  |
| Unigene18994  | Potri.019G039000.1 | 1.0421  | 4.07     | -1.9655 | Down | 7.47E-11  | 2.24E-10  |
| Unigene116539 | Potri.018G018800.1 | 0.9267  | 3.6192   | -1.9655 | Down | 1.98E-04  | 3.69E-04  |
| Unigene53996  | Potri.015G146700.1 | 4.3403  | 16.9509  | -1.9655 | Down | 5.17E-14  | 1.80E-13  |
| Unigene2131   | Potri.015G014800.2 | 3.9366  | 15.3743  | -1.9655 | Down | 3.68E-17  | 1.47E-16  |
| Unigene111109 | Potri.014G168400.1 | 1.303   | 5.089    | -1.9655 | Down | 1.98E-04  | 3.69E-04  |
| Unigene30260  | Potri.013G119900.1 | 1.289   | 5.034    | -1.9655 | Down | 1.14E-07  | 2.82E-07  |
| Unigene95665  | Potri.011G095200.1 | 2.935   | 11.4627  | -1.9655 | Down | 7.47E-11  | 2.24E-10  |
| Unigene112413 | Potri.011G049400.1 | 1.233   | 4.8156   | -1.9655 | Down | 1.98E-04  | 3.69E-04  |
| Unigene112457 | Potri.010G127200.1 | 1.228   | 4.7958   | -1.9655 | Down | 1.98E-04  | 3.69E-04  |

|               |                     |         |          |         |      |           |           |
|---------------|---------------------|---------|----------|---------|------|-----------|-----------|
| Unigene22490  | Potri.009G116100.2  | 9.7657  | 38.1394  | -1.9655 | Down | 9.85E-58  | 1.12E-56  |
| Unigene52721  | Potri.008G202600.1  | 5.5602  | 21.715   | -1.9655 | Down | 2.68E-20  | 1.20E-19  |
| Unigene104354 | Potri.008G070700.5  | 1.2032  | 4.6991   | -1.9655 | Down | 1.14E-07  | 2.82E-07  |
| Unigene56314  | Potri.008G018300.5  | 1.0013  | 3.9106   | -1.9655 | Down | 1.98E-04  | 3.69E-04  |
| Unigene45340  | Potri.006G281400.1  | 8.3663  | 32.674   | -1.9655 | Down | 9.85E-58  | 1.12E-56  |
| Unigene8134   | Potri.006G092900.1  | 2.979   | 11.6343  | -1.9655 | Down | 2.68E-20  | 1.20E-19  |
| Unigene8803   | Potri.005G194900.1  | 1.2974  | 5.0668   | -1.9655 | Down | 1.14E-07  | 2.82E-07  |
| Unigene112682 | Potri.005G069100.1  | 1.2179  | 4.7566   | -1.9655 | Down | 1.98E-04  | 3.69E-04  |
| Unigene9271   | Potri.004G085100.1  | 1.0851  | 4.2377   | -1.9655 | Down | 1.98E-04  | 3.69E-04  |
| Unigene114235 | Potri.003G083600.1  | 1.1218  | 4.3811   | -1.9655 | Down | 1.98E-04  | 3.69E-04  |
| Unigene1463   | Potri.003G009900.1  | 5.6992  | 22.2581  | -1.9655 | Down | 2.80E-45  | 2.47E-44  |
| Unigene26376  | Potri.001G307700.4  | 1.0851  | 4.2377   | -1.9655 | Down | 1.98E-04  | 3.69E-04  |
| Unigene107060 | Potri.001G025100.18 | 1.7622  | 6.8821   | -1.9655 | Down | 7.47E-11  | 2.24E-10  |
| Unigene12689  | Potri.014G040200.1  | 0.7873  | 3.0749   | -1.9656 | Down | 1.98E-04  | 3.69E-04  |
| Unigene21767  | Potri.001G068600.2  | 8.9023  | 34.7705  | -1.9656 | Down | 3.09E-155 | 1.16E-153 |
| Unigene76662  | Potri.010G160500.1  | 49.6232 | 193.8449 | -1.9658 | Down | 3.61E-119 | 9.65E-118 |
| Unigene7968   | Potri.002G175400.1  | 4.9628  | 19.3891  | -1.966  | Down | 1.14E-75  | 1.75E-74  |
| Unigene1329   | Potri.006G083700.3  | 14.264  | 55.7294  | -1.9661 | Down | 1.88E-69  | 2.63E-68  |
| Unigene30279  | Potri.012G091200.3  | 8.4714  | 33.1017  | -1.9662 | Down | 9.28E-28  | 5.28E-27  |
| Unigene7653   | Potri.011G169800.3  | 2.977   | 11.6342  | -1.9664 | Down | 2.59E-61  | 3.15E-60  |
| Unigene32016  | Potri.018G017600.2  | 9.7983  | 38.2927  | -1.9665 | Down | 1.20E-140 | 3.94E-139 |
| Unigene30532  | Potri.005G257000.2  | 15.0479 | 58.8118  | -1.9665 | Down | 2.55E-38  | 1.92E-37  |
| Unigene22957  | Potri.011G049500.1  | 5.9624  | 23.3044  | -1.9666 | Down | 3.35E-35  | 2.33E-34  |
| Unigene107848 | Potri.010G098700.1  | 23.7027 | 92.6437  | -1.9666 | Down | 5.62E-52  | 5.72E-51  |
| Unigene50660  | Potri.006G141400.1  | 10.6094 | 41.4666  | -1.9666 | Down | 1.43E-88  | 2.63E-87  |
| Unigene48814  | Potri.002G045900.2  | 12.7115 | 49.6817  | -1.9666 | Down | 4.33E-55  | 4.69E-54  |
| Unigene52445  | Potri.001G314300.1  | 10.657  | 41.6538  | -1.9666 | Down | 3.35E-35  | 2.33E-34  |
| Unigene32017  | Potri.018G018600.2  | 2.5412  | 9.9332   | -1.9667 | Down | 7.30E-49  | 6.96E-48  |
| Unigene24269  | Potri.015G005600.3  | 3.3647  | 13.1534  | -1.9669 | Down | 5.88E-29  | 3.47E-28  |
| Unigene39199  | Potri.012G059400.1  | 3.4859  | 13.6276  | -1.9669 | Down | 5.88E-29  | 3.46E-28  |
| Unigene35077  | Potri.005G094900.1  | 4.151   | 16.2274  | -1.9669 | Down | 5.88E-29  | 3.46E-28  |
| Unigene114248 | Potri.003G086400.1  | 4.9078  | 19.1862  | -1.9669 | Down | 3.20E-15  | 1.18E-14  |
| Unigene71894  | Potri.001G367400.3  | 31.8411 | 124.4761 | -1.9669 | Down | 6.41E-70  | 8.99E-69  |
| Unigene45712  | Potri.001G084600.2  | 2.5902  | 10.126   | -1.9669 | Down | 5.88E-29  | 3.46E-28  |
| Unigene88321  | Potri.014G154400.1  | 40.1167 | 156.8558 | -1.9672 | Down | 2.15E-140 | 7.07E-139 |
| Unigene10188  | Potri.016G117200.1  | 2.8289  | 11.0622  | -1.9673 | Down | 4.57E-12  | 1.45E-11  |
| Unigene53997  | Potri.016G043100.1  | 4.1615  | 16.2733  | -1.9673 | Down | 4.57E-12  | 1.45E-11  |
| Unigene16340  | Potri.012G143900.1  | 4.3223  | 16.9019  | -1.9673 | Down | 4.57E-12  | 1.45E-11  |
| Unigene44211  | Potri.010G092300.1  | 8.2323  | 32.192   | -1.9673 | Down | 2.81E-33  | 1.87E-32  |

|               |                    |         |          |         |      |           |           |
|---------------|--------------------|---------|----------|---------|------|-----------|-----------|
| Unigene119243 | Potri.007G113600.1 | 1.5736  | 6.1534   | -1.9673 | Down | 4.57E-12  | 1.45E-11  |
| Unigene29194  | Potri.007G107800.1 | 3.4608  | 13.5332  | -1.9673 | Down | 1.06E-22  | 5.14E-22  |
| Unigene27076  | Potri.006G118800.3 | 2.1025  | 8.2216   | -1.9673 | Down | 4.57E-12  | 1.45E-11  |
| Unigene43827  | Potri.001G166400.2 | 5.2452  | 20.5112  | -1.9673 | Down | 1.06E-22  | 5.14E-22  |
| Unigene44317  | Potri.001G084000.2 | 2.1337  | 8.3435   | -1.9673 | Down | 4.57E-12  | 1.45E-11  |
| Unigene24990  | Potri.019G024200.2 | 15.9288 | 62.2932  | -1.9674 | Down | 2.97E-111 | 7.27E-110 |
| Unigene69136  | Potri.017G026200.2 | 1.0899  | 4.2621   | -1.9674 | Down | 4.57E-12  | 1.45E-11  |
| Unigene94832  | Potri.005G218600.1 | 1.0817  | 4.23     | -1.9674 | Down | 4.57E-12  | 1.45E-11  |
| Unigene70823  | Potri.009G121300.2 | 18.557  | 72.5733  | -1.9675 | Down | 1.03E-40  | 8.25E-40  |
| Unigene32446  | Potri.006G038400.1 | 8.9135  | 34.8666  | -1.9678 | Down | 1.91E-52  | 1.96E-51  |
| Unigene20574  | Potri.014G000500.5 | 13.7209 | 53.676   | -1.9679 | Down | 6.60E-42  | 5.41E-41  |
| Unigene5972   | Potri.003G194400.2 | 36.2057 | 141.6499 | -1.968  | Down | 1.11E-259 | 8.09E-258 |
| Unigene1361   | Potri.002G139700.1 | 19.0367 | 74.4788  | -1.968  | Down | 1.27E-145 | 4.36E-144 |
| Unigene81117  | Potri.018G093400.6 | 56.2454 | 220.0618 | -1.9681 | Down | 6.42E-150 | 2.30E-148 |
| Unigene68100  | Potri.018G026400.4 | 4.6624  | 18.242   | -1.9681 | Down | 1.99E-16  | 7.71E-16  |
| Unigene15562  | Potri.013G001400.1 | 10.0524 | 39.3302  | -1.9681 | Down | 2.36E-31  | 1.49E-30  |
| Unigene38839  | Potri.011G126800.1 | 4.9386  | 19.3225  | -1.9681 | Down | 1.99E-16  | 7.71E-16  |
| Unigene2256   | Potri.010G089500.1 | 6.2716  | 24.5379  | -1.9681 | Down | 8.64E-39  | 6.58E-38  |
| Unigene20939  | Potri.008G041800.1 | 1.4522  | 5.6819   | -1.9681 | Down | 6.80E-09  | 1.82E-08  |
| Unigene13507  | Potri.005G047800.1 | 1.2198  | 4.7724   | -1.9681 | Down | 6.80E-09  | 1.82E-08  |
| Unigene17906  | Potri.004G222000.1 | 2.5677  | 10.0463  | -1.9681 | Down | 1.99E-16  | 7.71E-16  |
| Unigene53901  | Potri.017G050400.1 | 19.1897 | 75.0899  | -1.9683 | Down | 6.85E-92  | 1.31E-90  |
| Unigene1066   | Potri.018G088200.1 | 3.758   | 14.7059  | -1.9684 | Down | 1.16E-69  | 1.61E-68  |
| Unigene45063  | Potri.010G052300.1 | 6.3888  | 25.0019  | -1.9684 | Down | 2.24E-81  | 3.74E-80  |
| Unigene18684  | Potri.010G253700.2 | 1.8842  | 7.3742   | -1.9685 | Down | 9.03E-21  | 4.12E-20  |
| Unigene38071  | Potri.009G071600.1 | 19.567  | 76.5825  | -1.9686 | Down | 1.01E-51  | 1.03E-50  |
| Unigene89546  | Potri.001G402500.1 | 32.9236 | 128.8621 | -1.9686 | Down | 4.43E-125 | 1.25E-123 |
| Unigene53869  | Potri.010G219600.5 | 6.1822  | 24.1999  | -1.9688 | Down | 4.20E-25  | 2.21E-24  |
| Unigene630    | Potri.002G238500.1 | 4.1962  | 16.4257  | -1.9688 | Down | 4.76E-72  | 6.90E-71  |
| Unigene39168  | Potri.001G259100.7 | 12.1851 | 47.7011  | -1.9689 | Down | 6.49E-53  | 6.72E-52  |
| Unigene90631  | Potri.016G052800.1 | 14.6705 | 57.437   | -1.9691 | Down | 1.59E-61  | 1.94E-60  |
| Unigene33128  | Potri.010G171100.1 | 15.5948 | 61.0615  | -1.9692 | Down | 1.91E-106 | 4.40E-105 |
| Unigene25093  | Potri.004G041800.2 | 13.0408 | 51.0624  | -1.9692 | Down | 4.60E-38  | 3.45E-37  |
| Unigene39291  | Potri.009G118900.1 | 20.7483 | 81.2456  | -1.9693 | Down | 5.07E-241 | 3.32E-239 |
| Unigene69592  | Potri.002G094000.1 | 3.7914  | 14.8487  | -1.9695 | Down | 1.26E-30  | 7.79E-30  |
| Unigene10637  | Potri.001G078500.1 | 4.0206  | 15.7463  | -1.9695 | Down | 1.32E-59  | 1.55E-58  |
| Unigene51645  | Potri.015G086800.2 | 12.9937 | 50.8903  | -1.9696 | Down | 6.06E-35  | 4.19E-34  |
| Unigene87774  | Potri.016G057100.2 | 14.06   | 55.0825  | -1.97   | Down | 4.47E-49  | 4.29E-48  |
| Unigene48877  | Potri.013G123800.1 | 1.343   | 5.2616   | -1.97   | Down | 4.10E-10  | 1.18E-09  |

|               |                    |         |          |         |      |           |           |
|---------------|--------------------|---------|----------|---------|------|-----------|-----------|
| Unigene4107   | Potri.010G255600.1 | 4.698   | 18.4054  | -1.97   | Down | 1.73E-14  | 6.18E-14  |
| Unigene64411  | Potri.008G117700.1 | 11.5251 | 45.1519  | -1.97   | Down | 9.12E-45  | 7.96E-44  |
| Unigene34570  | Potri.004G100900.1 | 2.3905  | 9.3652   | -1.97   | Down | 4.47E-49  | 4.29E-48  |
| Unigene4547   | Potri.003G033500.1 | 0.9283  | 3.6367   | -1.97   | Down | 1.11E-05  | 2.33E-05  |
| Unigene102057 | Potri.001G289800.4 | 1.0232  | 4.0085   | -1.97   | Down | 4.10E-10  | 1.18E-09  |
| Unigene13850  | Potri.014G031600.2 | 8.1602  | 31.9717  | -1.9701 | Down | 8.75E-115 | 2.23E-113 |
| Unigene30193  | Potri.012G002100.1 | 17.5591 | 68.7966  | -1.9701 | Down | 1.13E-127 | 3.27E-126 |
| Unigene31897  | Potri.010G214300.1 | 3.5692  | 13.9872  | -1.9704 | Down | 1.10E-68  | 1.52E-67  |
| Unigene49     | Potri.008G195900.3 | 4.2884  | 16.8052  | -1.9704 | Down | 5.51E-73  | 8.10E-72  |
| Unigene20120  | Potri.008G085700.1 | 13.4242 | 52.6096  | -1.9705 | Down | 4.47E-60  | 5.32E-59  |
| Unigene20359  | Potri.013G070200.1 | 12.6884 | 49.7307  | -1.9706 | Down | 3.72E-47  | 3.43E-46  |
| Unigene5054   | Potri.012G056000.1 | 7.0468  | 27.6191  | -1.9706 | Down | 2.25E-24  | 1.15E-23  |
| Unigene10784  | Potri.015G117300.2 | 9.7975  | 38.4068  | -1.9709 | Down | 1.35E-289 | 1.15E-287 |
| Unigene73099  | Potri.002G128700.8 | 26.2346 | 102.8664 | -1.9712 | Down | 2.37E-59  | 2.79E-58  |
| Unigene37878  | Potri.015G050800.1 | 15.0599 | 59.0515  | -1.9713 | Down | 2.05E-35  | 1.44E-34  |
| Unigene13347  | Potri.016G110800.1 | 4.895   | 19.1961  | -1.9714 | Down | 3.05E-21  | 1.41E-20  |
| Unigene69737  | Potri.003G093700.1 | 2.1097  | 8.2734   | -1.9714 | Down | 2.49E-11  | 7.66E-11  |
| Unigene12594  | Potri.014G013800.1 | 24.827  | 97.3686  | -1.9715 | Down | 8.48E-249 | 5.81E-247 |
| Unigene54701  | Potri.006G084900.3 | 1.9756  | 7.7476   | -1.9715 | Down | 2.49E-11  | 7.66E-11  |
| Unigene7121   | Potri.005G127200.1 | 4.8315  | 18.9474  | -1.9715 | Down | 3.05E-21  | 1.41E-20  |
| Unigene47388  | Potri.015G103400.1 | 13.3625 | 52.4065  | -1.9716 | Down | 3.07E-56  | 3.40E-55  |
| Unigene15843  | Potri.013G001300.2 | 10.9003 | 42.7541  | -1.9717 | Down | 8.98E-27  | 4.96E-26  |
| Unigene44721  | Potri.012G071500.1 | 11.4288 | 44.8306  | -1.9718 | Down | 5.13E-88  | 9.37E-87  |
| Unigene536    | Potri.011G052600.1 | 8.123   | 31.8624  | -1.9718 | Down | 8.32E-98  | 1.73E-96  |
| Unigene14043  | Potri.007G019500.2 | 12.8921 | 50.5686  | -1.9718 | Down | 4.04E-42  | 3.33E-41  |
| Unigene53287  | Potri.002G027900.1 | 4.8652  | 19.0846  | -1.9718 | Down | 6.69E-17  | 2.64E-16  |
| Unigene42568  | Potri.T013000.1    | 8.2748  | 32.4612  | -1.9719 | Down | 4.65E-207 | 2.51E-205 |
| Unigene78493  | Potri.009G168100.2 | 14.4792 | 56.8019  | -1.972  | Down | 8.31E-38  | 6.19E-37  |
| Unigene53973  | Potri.004G211200.3 | 10.4597 | 41.0357  | -1.972  | Down | 2.58E-43  | 2.18E-42  |
| Unigene32958  | Potri.001G242600.1 | 10.0146 | 39.2895  | -1.972  | Down | 1.12E-105 | 2.55E-104 |
| Unigene16412  | Potri.005G092700.2 | 17.2852 | 67.8248  | -1.9723 | Down | 5.30E-39  | 4.05E-38  |
| Unigene3457   | Potri.003G108900.1 | 12.5655 | 49.3053  | -1.9723 | Down | 5.30E-39  | 4.05E-38  |
| Unigene22362  | Potri.015G082800.2 | 3.6489  | 14.3207  | -1.9726 | Down | 3.30E-51  | 3.30E-50  |
| Unigene107982 | Potri.014G145200.2 | 7.6793  | 30.1389  | -1.9726 | Down | 4.17E-18  | 1.73E-17  |
| Unigene9589   | Potri.012G111800.1 | 1.4465  | 5.6771   | -1.9726 | Down | 6.39E-07  | 1.49E-06  |
| Unigene7943   | Potri.008G096100.2 | 6.2012  | 24.3378  | -1.9726 | Down | 1.38E-133 | 4.26E-132 |
| Unigene98272  | Potri.008G032600.4 | 1.3634  | 5.351    | -1.9726 | Down | 6.39E-07  | 1.49E-06  |
| Unigene41358  | Potri.004G098300.2 | 1.0947  | 4.2965   | -1.9726 | Down | 6.39E-07  | 1.49E-06  |
| Unigene60234  | Potri.003G218600.5 | 7.8134  | 30.665   | -1.9726 | Down | 1.09E-34  | 7.52E-34  |

|               |                     |         |          |         |      |           |           |
|---------------|---------------------|---------|----------|---------|------|-----------|-----------|
| Unigene29925  | Potri.003G147200.1  | 0.9599  | 3.7674   | -1.9726 | Down | 6.39E-07  | 1.49E-06  |
| Unigene31247  | Potri.002G139200.1  | 3.4929  | 13.7087  | -1.9726 | Down | 1.53E-12  | 4.98E-12  |
| Unigene116936 | Potri.017G007200.1  | 6.5109  | 25.5616  | -1.973  | Down | 7.61E-25  | 3.96E-24  |
| Unigene14326  | Potri.013G031400.1  | 15.002  | 58.894   | -1.973  | Down | 4.28E-59  | 5.00E-58  |
| Unigene32586  | Potri.012G051900.1  | 4.9283  | 19.3471  | -1.973  | Down | 4.28E-59  | 5.00E-58  |
| Unigene5798   | Potri.012G101600.3  | 17.8192 | 69.9581  | -1.9731 | Down | 4.29E-48  | 4.03E-47  |
| Unigene43881  | Potri.006G258300.1  | 8.4329  | 33.1091  | -1.9731 | Down | 1.37E-42  | 1.14E-41  |
| Unigene32803  | Potri.002G192300.4  | 7.9163  | 31.0796  | -1.9731 | Down | 3.03E-135 | 9.49E-134 |
| Unigene43041  | Potri.008G183500.1  | 6.2426  | 24.5147  | -1.9734 | Down | 7.58E-159 | 2.92E-157 |
| Unigene106463 | Potri.014G041600.1  | 3.381   | 13.2776  | -1.9735 | Down | 9.40E-14  | 3.24E-13  |
| Unigene116488 | Potri.010G150800.1  | 7.2043  | 28.2924  | -1.9735 | Down | 4.80E-26  | 2.59E-25  |
| Unigene37974  | Potri.010G004700.2  | 10.1429 | 39.8327  | -1.9735 | Down | 4.80E-26  | 2.59E-25  |
| Unigene13038  | Potri.006G191400.3  | 1.8209  | 7.1511   | -1.9735 | Down | 9.40E-14  | 3.24E-13  |
| Unigene52334  | Potri.001G100100.1  | 7.7603  | 30.476   | -1.9735 | Down | 4.80E-26  | 2.59E-25  |
| Unigene30278  | Potri.001G438300.1  | 9.7574  | 38.3213  | -1.9736 | Down | 3.54E-57  | 4.00E-56  |
| Unigene27598  | Potri.014G159300.4  | 6.631   | 26.046   | -1.9738 | Down | 1.80E-39  | 1.39E-38  |
| Unigene10507  | Potri.004G154800.1  | 4.1831  | 16.4309  | -1.9738 | Down | 1.64E-20  | 7.41E-20  |
| Unigene78265  | Potri.001G140200.4  | 35.7191 | 140.3077 | -1.9738 | Down | 1.30E-90  | 2.46E-89  |
| Unigene73618  | Potri.008G192200.2  | 14.4272 | 56.6763  | -1.974  | Down | 5.83E-34  | 3.94E-33  |
| Unigene65621  | Potri.005G105600.1  | 3.4886  | 13.7059  | -1.9741 | Down | 4.59E-54  | 4.86E-53  |
| Unigene16560  | Potri.008G197000.1  | 11.7425 | 46.1386  | -1.9742 | Down | 3.71E-35  | 2.58E-34  |
| Unigene985    | Potri.001G373300.1  | 6.3921  | 25.1158  | -1.9742 | Down | 3.71E-35  | 2.58E-34  |
| Unigene108375 | Potri.013G057400.1  | 3.0632  | 12.0361  | -1.9743 | Down | 3.77E-08  | 9.63E-08  |
| Unigene33960  | Potri.005G199600.5  | 1.7912  | 7.0381   | -1.9743 | Down | 3.77E-08  | 9.63E-08  |
| Unigene51270  | Potri.002G082100.2  | 59.071  | 232.1429 | -1.9745 | Down | 8.35E-292 | 7.14E-290 |
| Unigene6082   | Potri.002G073400.3  | 20.9104 | 82.197   | -1.9749 | Down | 1.33E-74  | 2.01E-73  |
| Unigene22546  | Potri.001G403500.2  | 9.2028  | 36.1788  | -1.975  | Down | 3.13E-98  | 6.55E-97  |
| Unigene73405  | Potri.004G173600.2  | 13.6117 | 53.5168  | -1.9751 | Down | 4.90E-32  | 3.15E-31  |
| Unigene18263  | Potri.003G073300.1  | 2.6662  | 10.4831  | -1.9752 | Down | 6.09E-40  | 4.77E-39  |
| Unigene14601  | Potri.018G026600.1  | 4.7115  | 18.5275  | -1.9754 | Down | 2.57E-25  | 1.36E-24  |
| Unigene17653  | Potri.013G025700.2  | 1.0566  | 4.1551   | -1.9755 | Down | 2.26E-09  | 6.21E-09  |
| Unigene38521  | Potri.008G139700.12 | 21.2928 | 83.7392  | -1.9755 | Down | 1.92E-114 | 4.87E-113 |
| Unigene48368  | Potri.003G077600.1  | 27.1162 | 106.6503 | -1.9757 | Down | 5.12E-92  | 9.85E-91  |
| Unigene74493  | Potri.002G112100.6  | 32.6371 | 128.3694 | -1.9757 | Down | 2.90E-76  | 4.50E-75  |
| Unigene16970  | Potri.001G106000.1  | 6.1515  | 24.1953  | -1.9757 | Down | 1.62E-26  | 8.90E-26  |
| Unigene92423  | Potri.009G169300.3  | 50.1777 | 197.3728 | -1.9758 | Down | 2.18E-253 | 1.53E-251 |
| Unigene84887  | Potri.001G001300.3  | 13.9709 | 54.9529  | -1.9758 | Down | 1.58E-43  | 1.34E-42  |
| Unigene54     | Potri.008G136100.1  | 8.6673  | 34.0994  | -1.9761 | Down | 2.55E-239 | 1.66E-237 |
| Unigene45663  | Potri.013G061800.6  | 28.0134 | 110.2175 | -1.9762 | Down | 1.79E-144 | 6.08E-143 |



|               |                    |         |          |         |      |           |           |
|---------------|--------------------|---------|----------|---------|------|-----------|-----------|
| Unigene13786  | Potri.006G243000.1 | 1.3468  | 5.2991   | -1.9762 | Down | 1.37E-10  | 4.03E-10  |
| Unigene60167  | Potri.017G001600.1 | 2.0622  | 8.1143   | -1.9763 | Down | 1.37E-10  | 4.03E-10  |
| Unigene96830  | Potri.010G155400.5 | 4.8061  | 18.9107  | -1.9763 | Down | 8.80E-20  | 3.88E-19  |
| Unigene22988  | Potri.006G051200.2 | 3.7709  | 14.8376  | -1.9763 | Down | 8.80E-20  | 3.88E-19  |
| Unigene25333  | Potri.004G103700.4 | 10.1827 | 40.066   | -1.9763 | Down | 5.09E-38  | 3.81E-37  |
| Unigene51249  | Potri.001G161900.3 | 10.3777 | 40.8334  | -1.9763 | Down | 6.50E-29  | 3.83E-28  |
| Unigene95320  | Potri.001G148100.1 | 2.1609  | 8.5027   | -1.9763 | Down | 1.37E-10  | 4.03E-10  |
| Unigene7582   | Potri.001G378900.1 | 4.7423  | 18.6613  | -1.9764 | Down | 2.17E-57  | 2.46E-56  |
| Unigene49701  | Potri.014G048700.1 | 5.6064  | 22.0649  | -1.9766 | Down | 5.52E-21  | 2.54E-20  |
| Unigene31917  | Potri.012G142400.2 | 7.7254  | 30.4035  | -1.9766 | Down | 1.43E-116 | 3.72E-115 |
| Unigene64308  | Potri.009G047700.2 | 2.4434  | 9.6165   | -1.9766 | Down | 5.52E-21  | 2.54E-20  |
| Unigene84227  | Potri.006G241800.1 | 6.622   | 26.0621  | -1.9766 | Down | 5.52E-21  | 2.54E-20  |
| Unigene27683  | Potri.005G192000.1 | 8.8938  | 35.0032  | -1.9766 | Down | 2.07E-40  | 1.64E-39  |
| Unigene16918  | Potri.005G223500.1 | 12.7158 | 50.0488  | -1.9767 | Down | 2.61E-31  | 1.65E-30  |
| Unigene6122   | Potri.017G012800.1 | 4.3294  | 17.0428  | -1.9769 | Down | 8.33E-12  | 2.62E-11  |
| Unigene19321  | Potri.005G118300.1 | 3.4268  | 13.4897  | -1.9769 | Down | 8.33E-12  | 2.62E-11  |
| Unigene72214  | Potri.003G101700.1 | 28.2463 | 111.1921 | -1.9769 | Down | 2.34E-63  | 2.95E-62  |
| Unigene66857  | Potri.002G072900.2 | 3.5394  | 13.9328  | -1.9769 | Down | 8.33E-12  | 2.62E-11  |
| Unigene57187  | Potri.001G166500.3 | 1.9792  | 7.791    | -1.9769 | Down | 8.33E-12  | 2.62E-11  |
| Unigene11242  | Potri.008G152600.1 | 3.9436  | 15.5253  | -1.977  | Down | 1.58E-96  | 3.22E-95  |
| Unigene30518  | Potri.014G066500.5 | 13.7622 | 54.1807  | -1.9771 | Down | 5.36E-44  | 4.60E-43  |
| Unigene1524   | Potri.013G106600.1 | 31.8016 | 125.2013 | -1.9771 | Down | 1.62E-234 | 1.02E-232 |
| Unigene37117  | Potri.003G056700.1 | 7.7414  | 30.4801  | -1.9772 | Down | 2.18E-23  | 1.09E-22  |
| Unigene89184  | Potri.016G116400.1 | 3.0994  | 12.2052  | -1.9774 | Down | 5.11E-13  | 1.71E-12  |
| Unigene115193 | Potri.003G168900.1 | 3.8088  | 14.9987  | -1.9774 | Down | 5.11E-13  | 1.71E-12  |
| Unigene27299  | Potri.009G088900.3 | 25.9922 | 102.3615 | -1.9775 | Down | 1.05E-71  | 1.51E-70  |
| Unigene22703  | Potri.010G084100.2 | 12.6337 | 49.7579  | -1.9776 | Down | 1.23E-109 | 2.96E-108 |
| Unigene53800  | Potri.012G003500.1 | 15.9673 | 62.8926  | -1.9778 | Down | 3.65E-51  | 3.64E-50  |
| Unigene17747  | Potri.006G263300.1 | 19.2612 | 75.8688  | -1.9778 | Down | 1.78E-76  | 2.77E-75  |
| Unigene89563  | Potri.012G102500.3 | 6.6681  | 26.2663  | -1.9779 | Down | 5.49E-27  | 3.05E-26  |
| Unigene31304  | Potri.T144600.1    | 6.03    | 23.7585  | -1.9782 | Down | 2.20E-29  | 1.31E-28  |
| Unigene70066  | Potri.001G253200.1 | 8.2976  | 32.693   | -1.9782 | Down | 2.85E-43  | 2.41E-42  |
| Unigene13494  | Potri.013G069600.1 | 2.4522  | 9.6639   | -1.9785 | Down | 8.85E-32  | 5.64E-31  |
| Unigene43871  | Potri.009G092400.1 | 4.4714  | 17.6222  | -1.9786 | Down | 2.34E-94  | 4.64E-93  |
| Unigene92827  | Potri.T119200.2    | 23.3763 | 92.1339  | -1.9787 | Down | 5.69E-128 | 1.65E-126 |
| Unigene86392  | Potri.019G100800.2 | 10.1613 | 40.0517  | -1.9788 | Down | 3.57E-34  | 2.42E-33  |
| Unigene29764  | Potri.018G095800.1 | 19.9472 | 78.6232  | -1.9788 | Down | 1.94E-50  | 1.91E-49  |
| Unigene87117  | Potri.013G131100.6 | 9.8346  | 38.7639  | -1.9788 | Down | 3.57E-34  | 2.42E-33  |
| Unigene53013  | Potri.005G155600.1 | 4.5379  | 17.8866  | -1.9788 | Down | 7.57E-18  | 3.11E-17  |

|               |                    |         |          |         |      |           |           |
|---------------|--------------------|---------|----------|---------|------|-----------|-----------|
| Unigene7394   | Potri.005G057800.1 | 2.439   | 9.6137   | -1.9788 | Down | 7.57E-18  | 3.11E-17  |
| Unigene9995   | Potri.002G063400.3 | 2.4988  | 9.8493   | -1.9788 | Down | 7.57E-18  | 3.11E-17  |
| Unigene15717  | Potri.001G407800.1 | 25.3212 | 99.8096  | -1.9788 | Down | 6.32E-134 | 1.95E-132 |
| Unigene19965  | Potri.010G093300.1 | 5.3633  | 21.1432  | -1.979  | Down | 4.73E-19  | 2.04E-18  |
| Unigene4042   | Potri.002G010300.1 | 4.2345  | 16.6953  | -1.9792 | Down | 2.97E-20  | 1.33E-19  |
| Unigene49196  | Potri.001G353100.1 | 15.7959 | 62.2799  | -1.9792 | Down | 5.11E-96  | 1.04E-94  |
| Unigene12135  | Potri.014G129900.2 | 2.6796  | 10.5659  | -1.9793 | Down | 1.86E-21  | 8.69E-21  |
| Unigene88752  | Potri.007G034800.1 | 16.7848 | 66.1874  | -1.9794 | Down | 2.24E-62  | 2.77E-61  |
| Unigene80368  | Potri.006G038400.2 | 38.0516 | 150.0464 | -1.9794 | Down | 5.63E-102 | 1.23E-100 |
| Unigene21823  | Potri.002G154700.1 | 5.5297  | 21.8068  | -1.9795 | Down | 9.67E-44  | 8.25E-43  |
| Unigene47828  | Potri.001G314300.1 | 6.064   | 23.9139  | -1.9795 | Down | 1.17E-22  | 5.68E-22  |
| Unigene10913  | Potri.010G119600.1 | 7.0869  | 27.951   | -1.9797 | Down | 1.56E-69  | 2.17E-68  |
| Unigene94818  | Potri.009G137200.2 | 21.2284 | 83.7299  | -1.9797 | Down | 6.40E-72  | 9.28E-71  |
| Unigene114988 | Potri.006G104700.1 | 7.8595  | 31       | -1.9798 | Down | 4.65E-25  | 2.44E-24  |
| Unigene75032  | Potri.001G287600.3 | 10.0487 | 39.6347  | -1.9798 | Down | 4.65E-25  | 2.44E-24  |
| Unigene93885  | Potri.012G095500.1 | 3.4619  | 13.6558  | -1.9799 | Down | 2.94E-26  | 1.60E-25  |
| Unigene22553  | Potri.011G035400.1 | 17.0893 | 67.4127  | -1.9799 | Down | 1.22E-179 | 5.55E-178 |
| Unigene33074  | Potri.004G079300.2 | 3.2393  | 12.7792  | -1.98   | Down | 1.18E-28  | 6.86E-28  |
| Unigene51705  | Potri.015G079000.1 | 10.9433 | 43.1742  | -1.9801 | Down | 7.44E-30  | 4.50E-29  |
| Unigene75688  | Potri.007G128300.3 | 23.8583 | 94.1275  | -1.9801 | Down | 4.51E-58  | 5.18E-57  |
| Unigene21796  | Potri.T037500.2    | 13.2541 | 52.2938  | -1.9802 | Down | 4.01E-119 | 1.07E-117 |
| Unigene113283 | Potri.007G000400.5 | 12.7292 | 50.2315  | -1.9805 | Down | 7.69E-36  | 5.45E-35  |
| Unigene51054  | Potri.010G169400.1 | 29.9327 | 118.1328 | -1.9806 | Down | 7.52E-155 | 2.80E-153 |
| Unigene86866  | Potri.010G131400.3 | 23.8134 | 93.9836  | -1.9806 | Down | 1.52E-79  | 2.49E-78  |
| Unigene11461  | Potri.011G107400.2 | 7.5943  | 29.976   | -1.9808 | Down | 2.89E-136 | 9.12E-135 |
| Unigene41937  | Potri.014G190600.3 | 1.2297  | 4.8576   | -1.9819 | Down | 6.36E-05  | 1.25E-04  |
| Unigene29600  | Potri.014G099100.1 | 1.5099  | 5.9645   | -1.9819 | Down | 2.78E-12  | 8.96E-12  |
| Unigene118675 | Potri.009G049200.1 | 1.4255  | 5.631    | -1.9819 | Down | 1.25E-08  | 3.28E-08  |
| Unigene35265  | Potri.005G020900.4 | 1.3872  | 5.4798   | -1.9819 | Down | 1.25E-08  | 3.28E-08  |
| Unigene104767 | Potri.002G247400.1 | 2.1695  | 8.5701   | -1.9819 | Down | 2.49E-24  | 1.28E-23  |
| Unigene12577  | Potri.002G079600.1 | 1.5596  | 6.1608   | -1.9819 | Down | 6.56E-16  | 2.48E-15  |
| Unigene98512  | Potri.T161800.1    | 2.0916  | 8.2624   | -1.982  | Down | 3.61E-06  | 7.94E-06  |
| Unigene48315  | Potri.019G037900.5 | 2.4866  | 9.8231   | -1.982  | Down | 2.78E-12  | 8.95E-12  |
| Unigene38214  | Potri.019G033500.2 | 9.2452  | 36.5216  | -1.982  | Down | 2.60E-36  | 1.87E-35  |
| Unigene114581 | Potri.019G033500.2 | 3.2911  | 13.0011  | -1.982  | Down | 4.55E-11  | 1.38E-10  |
| Unigene36058  | Potri.018G093800.1 | 3.3237  | 13.1298  | -1.982  | Down | 2.78E-12  | 8.96E-12  |
| Unigene53070  | Potri.018G085100.2 | 14.7791 | 58.3823  | -1.982  | Down | 4.10E-35  | 2.84E-34  |
| Unigene7987   | Potri.018G060300.1 | 4.7993  | 18.9587  | -1.982  | Down | 2.49E-24  | 1.28E-23  |
| Unigene116382 | Potri.017G060500.1 | 1.412   | 5.5778   | -1.982  | Down | 3.61E-06  | 7.94E-06  |

|               |                     |         |          |         |      |           |           |
|---------------|---------------------|---------|----------|---------|------|-----------|-----------|
| Unigene44409  | Potri.016G041200.1  | 2.3045  | 9.1037   | -1.982  | Down | 2.78E-12  | 8.95E-12  |
| Unigene20563  | Potri.016G006400.1  | 3.6809  | 14.5407  | -1.982  | Down | 1.71E-13  | 5.84E-13  |
| Unigene41250  | Potri.016G000100.1  | 1.0297  | 4.0678   | -1.982  | Down | 6.36E-05  | 1.25E-04  |
| Unigene52675  | Potri.015G084300.1  | 0.9688  | 3.8272   | -1.982  | Down | 3.61E-06  | 7.94E-06  |
| Unigene104417 | Potri.014G179100.1  | 1.2764  | 5.0423   | -1.982  | Down | 6.36E-05  | 1.25E-04  |
| Unigene49325  | Potri.014G091200.1  | 9.7976  | 38.7037  | -1.982  | Down | 4.54E-47  | 4.17E-46  |
| Unigene106087 | Potri.014G018000.1  | 1.9323  | 7.6333   | -1.982  | Down | 1.06E-14  | 3.81E-14  |
| Unigene98510  | Potri.013G055600.1  | 1.8754  | 7.4084   | -1.982  | Down | 1.25E-08  | 3.28E-08  |
| Unigene28896  | Potri.013G025300.1  | 4.6711  | 18.4524  | -1.982  | Down | 1.98E-55  | 2.16E-54  |
| Unigene116373 | Potri.013G018800.3  | 1.412   | 5.5778   | -1.982  | Down | 3.61E-06  | 7.94E-06  |
| Unigene31456  | Potri.011G164000.3  | 0.9515  | 3.7588   | -1.982  | Down | 2.10E-07  | 5.08E-07  |
| Unigene4814   | Potri.011G098300.1  | 1.5215  | 6.0104   | -1.982  | Down | 1.06E-14  | 3.81E-14  |
| Unigene30113  | Potri.010G166100.6  | 2.8449  | 11.2382  | -1.982  | Down | 1.25E-08  | 3.28E-08  |
| Unigene31055  | Potri.010G073200.1  | 1.2246  | 4.8376   | -1.982  | Down | 4.55E-11  | 1.38E-10  |
| Unigene16691  | Potri.010G067900.2  | 2.3957  | 9.4638   | -1.982  | Down | 2.52E-30  | 1.54E-29  |
| Unigene13981  | Potri.009G020400.2  | 1.5541  | 6.1394   | -1.982  | Down | 6.36E-05  | 1.25E-04  |
| Unigene36884  | Potri.008G058500.10 | 2.1427  | 8.4645   | -1.982  | Down | 2.78E-12  | 8.95E-12  |
| Unigene41133  | Potri.008G028800.1  | 3.0699  | 12.1272  | -1.982  | Down | 1.57E-25  | 8.35E-25  |
| Unigene4524   | Potri.006G145300.1  | 1.8174  | 7.1793   | -1.982  | Down | 7.50E-10  | 2.12E-09  |
| Unigene87444  | Potri.006G134000.3  | 10.9774 | 43.3644  | -1.982  | Down | 1.06E-38  | 8.02E-38  |
| Unigene41736  | Potri.005G055300.1  | 1.2069  | 4.7677   | -1.982  | Down | 7.50E-10  | 2.12E-09  |
| Unigene47362  | Potri.005G003100.1  | 3.439   | 13.5851  | -1.982  | Down | 4.08E-17  | 1.63E-16  |
| Unigene21272  | Potri.005G001800.2  | 6.5851  | 26.0134  | -1.982  | Down | 7.26E-164 | 2.93E-162 |
| Unigene82442  | Potri.004G198900.1  | 3.8586  | 15.2427  | -1.982  | Down | 2.78E-12  | 8.95E-12  |
| Unigene116482 | Potri.004G065800.9  | 1.3944  | 5.5083   | -1.982  | Down | 3.61E-06  | 7.94E-06  |
| Unigene105147 | Potri.003G196300.2  | 3.3848  | 13.3712  | -1.982  | Down | 6.28E-22  | 2.98E-21  |
| Unigene32104  | Potri.003G172600.3  | 3.4813  | 13.7523  | -1.982  | Down | 7.57E-52  | 7.68E-51  |
| Unigene19135  | Potri.002G133800.2  | 1.182   | 4.6694   | -1.982  | Down | 6.36E-05  | 1.25E-04  |
| Unigene45462  | Potri.002G106900.1  | 15.5904 | 61.5872  | -1.982  | Down | 1.04E-75  | 1.59E-74  |
| Unigene44094  | Potri.002G008700.1  | 1.9105  | 7.547    | -1.982  | Down | 7.50E-10  | 2.12E-09  |
| Unigene35389  | Potri.001G423600.1  | 2.2114  | 8.7359   | -1.982  | Down | 2.10E-07  | 5.08E-07  |
| Unigene11190  | Potri.001G357100.2  | 3.1179  | 12.3168  | -1.982  | Down | 1.98E-55  | 2.16E-54  |
| Unigene116639 | Potri.001G345300.1  | 2.0595  | 8.1357   | -1.982  | Down | 1.25E-08  | 3.28E-08  |
| Unigene61143  | Potri.001G307400.1  | 5.7725  | 22.8035  | -1.982  | Down | 4.08E-17  | 1.63E-16  |
| Unigene45567  | Potri.001G166500.3  | 1.6139  | 6.3755   | -1.982  | Down | 2.78E-12  | 8.95E-12  |
| Unigene115083 | Potri.001G144300.1  | 1.984   | 7.8375   | -1.982  | Down | 2.10E-07  | 5.08E-07  |
| Unigene62709  | Potri.T066600.1     | 1.0556  | 4.1702   | -1.9821 | Down | 6.36E-05  | 1.25E-04  |
| Unigene13526  | Potri.002G141300.3  | 7.0189  | 27.7382  | -1.9826 | Down | 1.12E-91  | 2.14E-90  |
| Unigene73686  | Potri.003G015300.1  | 44.1613 | 174.5782 | -1.983  | Down | 1.12E-101 | 2.44E-100 |

|               |                    |         |          |         |      |           |           |
|---------------|--------------------|---------|----------|---------|------|-----------|-----------|
| Unigene11641  | Potri.011G081200.4 | 45.4454 | 179.6787 | -1.9832 | Down | 0         | 0         |
| Unigene50890  | Potri.001G009700.1 | 14.3252 | 56.6378  | -1.9832 | Down | 5.91E-44  | 5.07E-43  |
| Unigene273    | Potri.014G193900.3 | 7.2958  | 28.8469  | -1.9833 | Down | 5.65E-161 | 2.22E-159 |
| Unigene85504  | Potri.002G124000.1 | 58.5217 | 231.4114 | -1.9834 | Down | 7.16E-183 | 3.34E-181 |
| Unigene10713  | Potri.002G240000.2 | 10.1395 | 40.1     | -1.9836 | Down | 7.10E-257 | 5.08E-255 |
| Unigene33957  | Potri.017G057900.1 | 29.8263 | 117.9677 | -1.9837 | Down | 9.09E-180 | 4.13E-178 |
| Unigene117367 | Potri.012G096500.2 | 7.6058  | 30.0828  | -1.9838 | Down | 8.52E-31  | 5.29E-30  |
| Unigene13560  | Potri.006G130400.1 | 9.6899  | 38.3261  | -1.9838 | Down | 4.20E-118 | 1.11E-116 |
| Unigene41988  | Potri.010G132600.1 | 7.1812  | 28.4068  | -1.9839 | Down | 6.93E-82  | 1.16E-80  |
| Unigene45006  | Potri.004G143700.1 | 5.6514  | 22.3541  | -1.9839 | Down | 3.36E-141 | 1.11E-139 |
| Unigene31276  | Potri.003G146100.1 | 6.736   | 26.6457  | -1.9839 | Down | 2.12E-28  | 1.23E-27  |
| Unigene43952  | Potri.001G206100.2 | 14.7405 | 58.3072  | -1.9839 | Down | 1.76E-165 | 7.19E-164 |
| Unigene93670  | Potri.001G356900.1 | 65.3647 | 258.6029 | -1.9842 | Down | 0         | 0         |
| Unigene71813  | Potri.005G045600.6 | 20.661  | 81.7493  | -1.9843 | Down | 8.18E-47  | 7.47E-46  |
| Unigene31146  | Potri.010G151400.1 | 10.6713 | 42.2267  | -1.9844 | Down | 2.01E-44  | 1.74E-43  |
| Unigene64942  | Potri.006G078300.1 | 6.0515  | 23.9452  | -1.9844 | Down | 1.33E-23  | 6.67E-23  |
| Unigene7611   | Potri.018G062700.2 | 3.5523  | 14.0575  | -1.9845 | Down | 2.12E-22  | 1.02E-21  |
| Unigene57500  | Potri.006G046500.1 | 11.2114 | 44.3663  | -1.9845 | Down | 3.14E-43  | 2.65E-42  |
| Unigene17290  | Potri.005G168300.1 | 3.6052  | 14.2665  | -1.9845 | Down | 2.12E-22  | 1.02E-21  |
| Unigene42496  | Potri.010G211100.3 | 5.3755  | 21.2745  | -1.9847 | Down | 7.73E-41  | 6.19E-40  |
| Unigene46718  | Potri.004G171600.1 | 27.2682 | 107.9216 | -1.9847 | Down | 8.89E-79  | 1.43E-77  |
| Unigene22761  | Potri.006G086900.1 | 8.2447  | 32.6327  | -1.9848 | Down | 2.16E-76  | 3.36E-75  |
| Unigene9642   | Potri.015G013700.2 | 4.9426  | 19.5663  | -1.985  | Down | 4.70E-36  | 3.35E-35  |
| Unigene11932  | Potri.013G114100.2 | 2.1357  | 8.4544   | -1.985  | Down | 8.58E-19  | 3.65E-18  |
| Unigene86483  | Potri.001G111800.1 | 15.9326 | 63.0721  | -1.985  | Down | 2.96E-53  | 3.09E-52  |
| Unigene34262  | Potri.013G084800.2 | 5.8221  | 23.0504  | -1.9852 | Down | 7.24E-51  | 7.20E-50  |
| Unigene17941  | Potri.007G082100.2 | 3.2364  | 12.8139  | -1.9852 | Down | 1.37E-17  | 5.58E-17  |
| Unigene21930  | Potri.007G086700.3 | 14.9826 | 59.3271  | -1.9854 | Down | 2.95E-154 | 1.10E-152 |
| Unigene31194  | Potri.002G205700.2 | 4.9823  | 19.7299  | -1.9855 | Down | 2.20E-16  | 8.52E-16  |
| Unigene45343  | Potri.009G112000.1 | 6.7241  | 26.6307  | -1.9857 | Down | 8.81E-129 | 2.59E-127 |
| Unigene46664  | Potri.005G021900.1 | 8.1254  | 32.1815  | -1.9857 | Down | 1.07E-43  | 9.09E-43  |
| Unigene7352   | Potri.017G023200.1 | 3.465   | 13.7245  | -1.9858 | Down | 3.55E-15  | 1.30E-14  |
| Unigene41023  | Potri.016G132000.1 | 13.4437 | 53.2489  | -1.9858 | Down | 1.67E-42  | 1.39E-41  |
| Unigene41293  | Potri.007G027500.1 | 10.2826 | 40.7282  | -1.9858 | Down | 1.67E-42  | 1.39E-41  |
| Unigene1733   | Potri.T010800.1    | 13.6444 | 54.0463  | -1.9859 | Down | 9.02E-149 | 3.20E-147 |
| Unigene21598  | Potri.003G145700.1 | 6.7021  | 26.5495  | -1.986  | Down | 1.11E-105 | 2.54E-104 |
| Unigene40770  | Potri.002G234300.1 | 8.303   | 32.8913  | -1.986  | Down | 1.13E-27  | 6.44E-27  |
| Unigene11338  | Potri.010G231100.3 | 6.8061  | 26.9633  | -1.9861 | Down | 1.57E-52  | 1.62E-51  |
| Unigene96445  | Potri.018G040800.1 | 1.3337  | 5.2839   | -1.9862 | Down | 5.73E-14  | 2.00E-13  |

|               |                     |         |         |         |      |           |           |
|---------------|---------------------|---------|---------|---------|------|-----------|-----------|
| Unigene32136  | Potri.001G472700.1  | 8.1926  | 32.4591 | -1.9862 | Down | 3.07E-149 | 1.09E-147 |
| Unigene44365  | Potri.002G242100.1  | 11.4536 | 45.3809 | -1.9863 | Down | 1.51E-62  | 1.87E-61  |
| Unigene51308  | Potri.001G097500.1  | 7.4944  | 29.6981 | -1.9865 | Down | 1.59E-36  | 1.15E-35  |
| Unigene41371  | Potri.012G110700.1  | 2.3209  | 9.1979  | -1.9866 | Down | 9.30E-13  | 3.06E-12  |
| Unigene51526  | Potri.004G130000.5  | 1.3981  | 5.5409  | -1.9867 | Down | 9.30E-13  | 3.06E-12  |
| Unigene24341  | Potri.014G167200.1  | 5.1004  | 20.2155 | -1.9868 | Down | 3.43E-100 | 7.38E-99  |
| Unigene1087   | Potri.011G077700.2  | 11.4935 | 45.5588 | -1.9869 | Down | 2.37E-171 | 1.01E-169 |
| Unigene32808  | Potri.017G057900.1  | 14.8677 | 58.943  | -1.9871 | Down | 4.85E-93  | 9.46E-92  |
| Unigene10609  | Potri.005G137700.1  | 8.6757  | 34.3927 | -1.9871 | Down | 6.52E-229 | 3.99E-227 |
| Unigene1416   | Potri.010G217600.1  | 1.594   | 6.3197  | -1.9872 | Down | 1.52E-11  | 4.71E-11  |
| Unigene52956  | Potri.008G111100.1  | 6.7817  | 26.8876 | -1.9872 | Down | 1.14E-21  | 5.34E-21  |
| Unigene8140   | Potri.008G102300.4  | 6.0947  | 24.1637 | -1.9872 | Down | 9.76E-32  | 6.22E-31  |
| Unigene23257  | Potri.007G052500.9  | 4.9014  | 19.4325 | -1.9872 | Down | 8.88E-42  | 7.27E-41  |
| Unigene28642  | Potri.010G098700.1  | 10.248  | 40.6317 | -1.9873 | Down | 1.17E-110 | 2.85E-109 |
| Unigene4730   | Potri.004G218300.2  | 11.1325 | 44.1419 | -1.9874 | Down | 1.39E-40  | 1.11E-39  |
| Unigene34193  | Potri.003G129000.1  | 2.4481  | 9.7075  | -1.9874 | Down | 1.54E-30  | 9.48E-30  |
| Unigene18328  | Potri.005G176700.1  | 5.4262  | 21.5173 | -1.9875 | Down | 2.04E-49  | 1.97E-48  |
| Unigene42618  | Potri.005G158100.1  | 8.6227  | 34.1966 | -1.9876 | Down | 1.62E-177 | 7.22E-176 |
| Unigene7453   | Potri.006G081700.1  | 4.5143  | 17.904  | -1.9877 | Down | 7.16E-66  | 9.44E-65  |
| Unigene36682  | Potri.018G145800.4  | 12.1031 | 48.0089 | -1.9879 | Down | 7.83E-46  | 7.00E-45  |
| Unigene118618 | Potri.018G122300.2  | 3.5523  | 14.0909 | -1.9879 | Down | 2.89E-19  | 1.25E-18  |
| Unigene50349  | Potri.015G126800.1  | 5.9142  | 23.4595 | -1.9879 | Down | 5.39E-37  | 3.94E-36  |
| Unigene41230  | Potri.014G079800.2  | 1.5934  | 6.3204  | -1.9879 | Down | 2.49E-10  | 7.25E-10  |
| Unigene29373  | Potri.012G140700.1  | 2.0722  | 8.2197  | -1.9879 | Down | 2.49E-10  | 7.25E-10  |
| Unigene31937  | Potri.001G366800.2  | 9.035   | 35.8387 | -1.9879 | Down | 1.40E-151 | 5.11E-150 |
| Unigene41185  | Potri.001G146200.10 | 2.1095  | 8.3676  | -1.9879 | Down | 2.49E-10  | 7.25E-10  |
| Unigene32480  | Potri.008G014800.1  | 5.2364  | 20.7725 | -1.988  | Down | 6.29E-80  | 1.03E-78  |
| Unigene28737  | Potri.T010700.4     | 15.1571 | 60.1358 | -1.9882 | Down | 5.61E-94  | 1.11E-92  |
| Unigene24016  | Potri.003G173000.1  | 10.8899 | 43.2061 | -1.9882 | Down | 1.00E-68  | 1.38E-67  |
| Unigene89816  | Potri.003G010400.1  | 15.1242 | 60.0026 | -1.9882 | Down | 4.24E-61  | 5.14E-60  |
| Unigene24207  | Potri.014G016900.1  | 8.3597  | 33.1682 | -1.9883 | Down | 1.35E-101 | 2.95E-100 |
| Unigene73679  | Potri.005G116400.3  | 24.9837 | 99.1361 | -1.9884 | Down | 1.03E-58  | 1.20E-57  |
| Unigene12359  | Potri.002G023300.2  | 4.8545  | 19.2651 | -1.9886 | Down | 2.10E-33  | 1.40E-32  |
| Unigene33209  | Potri.001G092000.3  | 22.7304 | 90.205  | -1.9886 | Down | 1.63E-152 | 5.97E-151 |
| Unigene50596  | Potri.014G154000.1  | 11.529  | 45.7563 | -1.9887 | Down | 2.52E-56  | 2.80E-55  |
| Unigene31745  | Potri.015G058900.1  | 1.0484  | 4.1612  | -1.9888 | Down | 4.13E-09  | 1.12E-08  |
| Unigene5911   | Potri.012G047200.5  | 1.947   | 7.7279  | -1.9888 | Down | 4.13E-09  | 1.12E-08  |
| Unigene14952  | Potri.009G112700.2  | 4.9044  | 19.4669 | -1.9889 | Down | 7.40E-17  | 2.92E-16  |
| Unigene9927   | Potri.002G032100.2  | 3.8411  | 15.2464 | -1.9889 | Down | 7.40E-17  | 2.92E-16  |

|               |                    |         |          |         |      |           |           |
|---------------|--------------------|---------|----------|---------|------|-----------|-----------|
| Unigene20525  | Potri.001G107500.1 | 18.1716 | 72.1273  | -1.9889 | Down | 9.23E-63  | 1.15E-61  |
| Unigene100508 | Potri.001G091900.1 | 3.1638  | 12.5579  | -1.9889 | Down | 4.13E-09  | 1.12E-08  |
| Unigene39861  | Potri.011G166900.3 | 8.7764  | 34.8409  | -1.9891 | Down | 1.16E-38  | 8.83E-38  |
| Unigene2576   | Potri.003G046800.1 | 3.1959  | 12.6876  | -1.9891 | Down | 5.21E-31  | 3.25E-30  |
| Unigene34924  | Potri.008G134900.2 | 6.0305  | 23.9427  | -1.9892 | Down | 4.16E-45  | 3.65E-44  |
| Unigene43551  | Potri.T148900.1    | 2.4772  | 9.8366   | -1.9894 | Down | 8.21E-30  | 4.96E-29  |
| Unigene38908  | Potri.008G121700.1 | 13.7234 | 54.4964  | -1.9895 | Down | 2.01E-64  | 2.58E-63  |
| Unigene28468  | Potri.013G114400.5 | 3.5293  | 14.0164  | -1.9897 | Down | 3.83E-22  | 1.83E-21  |
| Unigene50986  | Potri.008G058300.1 | 8.1937  | 32.5434  | -1.9898 | Down | 1.30E-28  | 7.56E-28  |
| Unigene22620  | Potri.010G159700.1 | 5.3907  | 21.4126  | -1.9899 | Down | 1.60E-41  | 1.30E-40  |
| Unigene78     | Potri.006G066300.1 | 7.4878  | 29.7446  | -1.99   | Down | 2.14E-217 | 1.23E-215 |
| Unigene50984  | Potri.010G207000.2 | 1.3879  | 5.5138   | -1.9901 | Down | 6.93E-08  | 1.74E-07  |
| Unigene14383  | Potri.005G098500.2 | 64.2249 | 255.1462 | -1.9901 | Down | 0         | 0         |
| Unigene115850 | Potri.002G088900.1 | 1.9827  | 7.8768   | -1.9901 | Down | 6.93E-08  | 1.74E-07  |
| Unigene47121  | Potri.018G122700.1 | 14.2578 | 56.6433  | -1.9902 | Down | 9.01E-47  | 8.22E-46  |
| Unigene34174  | Potri.018G113200.1 | 3.8933  | 15.4674  | -1.9902 | Down | 9.01E-47  | 8.22E-46  |
| Unigene6841   | Potri.014G172200.1 | 12.4703 | 49.5418  | -1.9902 | Down | 9.01E-47  | 8.22E-46  |
| Unigene18914  | Potri.013G108300.1 | 3.5523  | 14.1127  | -1.9902 | Down | 6.10E-21  | 2.80E-20  |
| Unigene13268  | Potri.009G021700.1 | 6.5984  | 26.2142  | -1.9902 | Down | 1.19E-59  | 1.41E-58  |
| Unigene119181 | Potri.007G042900.1 | 0.9848  | 3.9124   | -1.9902 | Down | 6.93E-08  | 1.74E-07  |
| Unigene47600  | Potri.001G316500.1 | 0.8175  | 3.2478   | -1.9902 | Down | 6.93E-08  | 1.74E-07  |
| Unigene45900  | Potri.012G031400.2 | 2.7087  | 10.7639  | -1.9905 | Down | 3.24E-26  | 1.76E-25  |
| Unigene620    | Potri.008G045900.1 | 9.3029  | 36.9704  | -1.9906 | Down | 1.23E-129 | 3.65E-128 |
| Unigene8064   | Potri.014G070600.1 | 3.7634  | 14.9568  | -1.9907 | Down | 9.72E-20  | 4.29E-19  |
| Unigene20002  | Potri.017G026500.1 | 10.6698 | 42.407   | -1.9908 | Down | 1.25E-49  | 1.21E-48  |
| Unigene47412  | Potri.005G149500.1 | 11.8973 | 47.2869  | -1.9908 | Down | 1.76E-31  | 1.11E-30  |
| Unigene54305  | Potri.014G051500.3 | 12.355  | 49.1153  | -1.9911 | Down | 6.52E-129 | 1.91E-127 |
| Unigene30517  | Potri.013G031700.1 | 19.128  | 76.0428  | -1.9911 | Down | 2.85E-82  | 4.82E-81  |
| Unigene33963  | Potri.011G035400.1 | 19.5306 | 77.6474  | -1.9912 | Down | 2.09E-104 | 4.71E-103 |
| Unigene73194  | Potri.008G068400.1 | 7.4599  | 29.6605  | -1.9913 | Down | 1.55E-18  | 6.55E-18  |
| Unigene52029  | Potri.003G164400.2 | 3.8538  | 15.3228  | -1.9913 | Down | 1.53E-35  | 1.07E-34  |
| Unigene52197  | Potri.013G008300.4 | 24.7119 | 98.2582  | -1.9914 | Down | 1.43E-130 | 4.27E-129 |
| Unigene90023  | Potri.011G087200.8 | 59.5184 | 236.6703 | -1.9915 | Down | 6.31E-240 | 4.12E-238 |
| Unigene119169 | Potri.017G031800.1 | 0.8055  | 3.2041   | -1.992  | Down | 1.18E-06  | 2.70E-06  |
| Unigene36741  | Potri.014G089200.1 | 14.9045 | 59.2896  | -1.992  | Down | 2.35E-80  | 3.87E-79  |
| Unigene47307  | Potri.012G133100.1 | 3.5786  | 14.2353  | -1.992  | Down | 5.07E-12  | 1.61E-11  |
| Unigene32753  | Potri.011G095200.1 | 2.1551  | 8.5728   | -1.992  | Down | 6.92E-28  | 3.96E-27  |
| Unigene117765 | Potri.010G056400.1 | 2.5387  | 10.0989  | -1.992  | Down | 5.07E-12  | 1.61E-11  |
| Unigene78509  | Potri.008G043000.2 | 10.2298 | 40.6939  | -1.992  | Down | 6.92E-28  | 3.96E-27  |

|               |                    |          |          |         |      |           |           |
|---------------|--------------------|----------|----------|---------|------|-----------|-----------|
| Unigene51653  | Potri.002G063500.4 | 9.3449   | 37.1735  | -1.992  | Down | 6.62E-49  | 6.32E-48  |
| Unigene13279  | Potri.001G380900.2 | 2.2819   | 9.0771   | -1.992  | Down | 1.29E-22  | 6.26E-22  |
| Unigene20373  | Potri.001G175000.1 | 8.1041   | 32.2377  | -1.992  | Down | 3.78E-33  | 2.50E-32  |
| Unigene14697  | Potri.005G070300.1 | 1.5777   | 6.2762   | -1.9921 | Down | 2.49E-17  | 1.00E-16  |
| Unigene116847 | Potri.001G342700.1 | 1.4474   | 5.7579   | -1.9921 | Down | 1.18E-06  | 2.70E-06  |
| Unigene82947  | Potri.014G053300.1 | 55.8789  | 222.3076 | -1.9922 | Down | 1.05E-161 | 4.17E-160 |
| Unigene34482  | Potri.009G132900.1 | 9.7036   | 38.6043  | -1.9922 | Down | 2.12E-84  | 3.69E-83  |
| Unigene80734  | Potri.008G087800.1 | 22.3797  | 89.0504  | -1.9924 | Down | 2.99E-62  | 3.70E-61  |
| Unigene8383   | Potri.009G058100.1 | 15.1371  | 60.2388  | -1.9926 | Down | 4.63E-86  | 8.25E-85  |
| Unigene33621  | Potri.003G066000.1 | 3.7684   | 14.997   | -1.9926 | Down | 2.06E-21  | 9.58E-21  |
| Unigene20879  | Potri.008G117700.1 | 15.9721  | 63.5675  | -1.9927 | Down | 2.40E-70  | 3.39E-69  |
| Unigene22747  | Potri.002G137100.1 | 12.3599  | 49.189   | -1.9927 | Down | 4.36E-115 | 1.11E-113 |
| Unigene59058  | Potri.015G000500.1 | 2.9773   | 11.8506  | -1.9929 | Down | 4.00E-16  | 1.53E-15  |
| Unigene28753  | Potri.013G014000.1 | 1.9348   | 7.7012   | -1.9929 | Down | 4.00E-16  | 1.53E-15  |
| Unigene1044   | Potri.008G054500.1 | 8.3482   | 33.2292  | -1.9929 | Down | 1.12E-83  | 1.93E-82  |
| Unigene33089  | Potri.005G187000.1 | 2.2836   | 9.0895   | -1.9929 | Down | 4.00E-16  | 1.53E-15  |
| Unigene40230  | Potri.003G149100.3 | 10.2633  | 40.8507  | -1.9929 | Down | 6.50E-89  | 1.20E-87  |
| Unigene46261  | Potri.008G195900.4 | 23.7483  | 94.5364  | -1.993  | Down | 3.35E-73  | 4.96E-72  |
| Unigene17416  | Potri.014G041400.1 | 2.7309   | 10.8715  | -1.9931 | Down | 8.14E-35  | 5.61E-34  |
| Unigene31924  | Potri.014G160700.1 | 3.481    | 13.8587  | -1.9932 | Down | 1.01E-62  | 1.26E-61  |
| Unigene36788  | Potri.013G027500.1 | 2.914    | 11.6011  | -1.9932 | Down | 3.98E-44  | 3.42E-43  |
| Unigene54440  | Potri.017G071400.1 | 9.7858   | 38.9628  | -1.9933 | Down | 1.48E-29  | 8.89E-29  |
| Unigene49182  | Potri.013G149800.1 | 1.0929   | 4.3513   | -1.9933 | Down | 8.30E-11  | 2.48E-10  |
| Unigene64404  | Potri.008G181900.1 | 241.2255 | 960.4089 | -1.9933 | Down | 0         | 0         |
| Unigene114975 | Potri.001G212300.1 | 3.0639   | 12.1991  | -1.9933 | Down | 8.30E-11  | 2.48E-10  |
| Unigene48818  | Potri.018G057000.1 | 1.5024   | 5.982    | -1.9934 | Down | 8.30E-11  | 2.48E-10  |
| Unigene40238  | Potri.016G129000.1 | 1.3726   | 5.4652   | -1.9934 | Down | 8.30E-11  | 2.48E-10  |
| Unigene118253 | Potri.011G077900.1 | 2.0377   | 8.1134   | -1.9934 | Down | 8.30E-11  | 2.48E-10  |
| Unigene1492   | Potri.017G109600.1 | 5.9353   | 23.6347  | -1.9935 | Down | 6.24E-43  | 5.23E-42  |
| Unigene37711  | Potri.008G131600.1 | 8.9578   | 35.6762  | -1.9937 | Down | 4.87E-51  | 4.86E-50  |
| Unigene38533  | Potri.010G002900.4 | 3.2307   | 12.8677  | -1.9938 | Down | 6.44E-15  | 2.34E-14  |
| Unigene56687  | Potri.003G100300.1 | 5.3517   | 21.3156  | -1.9938 | Down | 6.44E-15  | 2.34E-14  |
| Unigene19275  | Potri.006G256400.1 | 1.9821   | 7.8947   | -1.9939 | Down | 6.44E-15  | 2.34E-14  |
| Unigene52037  | Potri.003G204900.2 | 2.67     | 10.6347  | -1.9939 | Down | 6.44E-15  | 2.34E-14  |
| Unigene41058  | Potri.008G091900.2 | 10.4374  | 41.5799  | -1.9941 | Down | 6.76E-54  | 7.15E-53  |
| Unigene3205   | Potri.002G133500.1 | 5.3597   | 21.3515  | -1.9941 | Down | 2.77E-71  | 3.97E-70  |
| Unigene33625  | Potri.003G146100.1 | 11.7299  | 46.7312  | -1.9942 | Down | 6.02E-58  | 6.89E-57  |
| Unigene21025  | Potri.009G110500.1 | 8.4844   | 33.8039  | -1.9943 | Down | 4.36E-23  | 2.15E-22  |
| Unigene13695  | Potri.005G170800.2 | 15.408   | 61.3872  | -1.9943 | Down | 2.01E-83  | 3.46E-82  |

|               |                    |         |          |         |      |           |           |
|---------------|--------------------|---------|----------|---------|------|-----------|-----------|
| Unigene13464  | Potri.004G103800.1 | 2.8322  | 11.2841  | -1.9943 | Down | 4.36E-23  | 2.15E-22  |
| Unigene12899  | Potri.012G098300.1 | 29.3468 | 116.9353 | -1.9944 | Down | 1.89E-213 | 1.06E-211 |
| Unigene51565  | Potri.006G101300.1 | 6.4029  | 25.5127  | -1.9944 | Down | 3.70E-27  | 2.07E-26  |
| Unigene53892  | Potri.017G058500.1 | 12.1648 | 48.4728  | -1.9945 | Down | 9.40E-57  | 1.05E-55  |
| Unigene10541  | Potri.013G073800.2 | 9.9013  | 39.4546  | -1.9945 | Down | 3.18E-31  | 2.00E-30  |
| Unigene2708   | Potri.019G092100.1 | 9.6703  | 38.5429  | -1.9948 | Down | 6.85E-84  | 1.18E-82  |
| Unigene24144  | Potri.013G031400.1 | 14.8288 | 59.1017  | -1.9948 | Down | 1.05E-67  | 1.42E-66  |
| Unigene41895  | Potri.009G036900.1 | 28.0528 | 111.8051 | -1.9948 | Down | 2.90E-183 | 1.35E-181 |
| Unigene889    | Potri.003G077600.1 | 8.4132  | 33.5336  | -1.9949 | Down | 3.74E-108 | 8.82E-107 |
| Unigene102378 | Potri.T060100.1    | 1.3713  | 5.4664   | -1.995  | Down | 2.06E-05  | 4.22E-05  |
| Unigene116156 | Potri.017G107200.1 | 1.2071  | 4.8118   | -1.995  | Down | 2.06E-05  | 4.22E-05  |
| Unigene116902 | Potri.012G077300.1 | 1.1068  | 4.412    | -1.995  | Down | 2.06E-05  | 4.22E-05  |
| Unigene29647  | Potri.007G005000.1 | 4.8652  | 19.3937  | -1.995  | Down | 5.85E-26  | 3.15E-25  |
| Unigene6257   | Potri.004G030500.1 | 1.2351  | 4.9234   | -1.995  | Down | 2.06E-05  | 4.22E-05  |
| Unigene95722  | Potri.003G217700.1 | 1.6652  | 6.6377   | -1.995  | Down | 2.06E-05  | 4.22E-05  |
| Unigene4430   | Potri.003G188300.1 | 1.6878  | 6.7278   | -1.995  | Down | 1.04E-13  | 3.59E-13  |
| Unigene52044  | Potri.003G168300.1 | 15.6954 | 62.5656  | -1.995  | Down | 1.46E-70  | 2.08E-69  |
| Unigene20277  | Potri.003G070400.1 | 3.6658  | 14.6128  | -1.995  | Down | 4.33E-34  | 2.94E-33  |
| Unigene52616  | Potri.001G139600.2 | 0.8881  | 3.5401   | -1.995  | Down | 2.06E-05  | 4.22E-05  |
| Unigene52217  | Potri.018G054300.1 | 1.0448  | 4.1649   | -1.9951 | Down | 2.06E-05  | 4.22E-05  |
| Unigene100075 | Potri.015G094500.1 | 1.5541  | 6.1952   | -1.9951 | Down | 2.06E-05  | 4.22E-05  |
| Unigene51741  | Potri.010G125200.1 | 1.0477  | 4.1766   | -1.9951 | Down | 2.06E-05  | 4.22E-05  |
| Unigene36481  | Potri.008G152800.7 | 1.2189  | 4.859    | -1.9951 | Down | 2.06E-05  | 4.22E-05  |
| Unigene77554  | Potri.005G046200.1 | 1.6077  | 6.4088   | -1.9951 | Down | 2.06E-05  | 4.22E-05  |
| Unigene104388 | Potri.002G084500.2 | 1.4513  | 5.7854   | -1.9951 | Down | 2.06E-05  | 4.22E-05  |
| Unigene10694  | Potri.011G051700.1 | 6.4539  | 25.7335  | -1.9954 | Down | 7.47E-167 | 3.09E-165 |
| Unigene40288  | Potri.003G010400.1 | 17.3524 | 69.1884  | -1.9954 | Down | 4.57E-45  | 4.02E-44  |
| Unigene2710   | Potri.003G085000.1 | 3.1184  | 12.4352  | -1.9956 | Down | 6.82E-33  | 4.49E-32  |
| Unigene21947  | Potri.002G068400.1 | 10.0513 | 40.0826  | -1.9956 | Down | 3.27E-87  | 5.90E-86  |
| Unigene10662  | Potri.001G455000.1 | 6.2282  | 24.8372  | -1.9956 | Down | 2.79E-110 | 6.75E-109 |
| Unigene42842  | Potri.001G407000.1 | 9.7125  | 38.736   | -1.9958 | Down | 3.29E-174 | 1.43E-172 |
| Unigene38797  | Potri.019G053000.3 | 3.722   | 14.8455  | -1.9959 | Down | 1.10E-20  | 5.02E-20  |
| Unigene1784   | Potri.012G046400.1 | 3.2768  | 13.0696  | -1.9959 | Down | 1.10E-20  | 5.02E-20  |
| Unigene33826  | Potri.003G081900.1 | 6.9308  | 27.6451  | -1.9959 | Down | 7.79E-55  | 8.38E-54  |
| Unigene23132  | Potri.006G004900.1 | 4.0876  | 16.308   | -1.9963 | Down | 1.25E-27  | 7.09E-27  |
| Unigene56662  | Potri.003G150400.1 | 4.0188  | 16.0335  | -1.9963 | Down | 1.25E-27  | 7.08E-27  |
| Unigene52749  | Potri.002G179800.1 | 27.8785 | 111.2343 | -1.9964 | Down | 5.39E-178 | 2.42E-176 |
| Unigene22023  | Potri.012G078400.1 | 7.7982  | 31.1169  | -1.9965 | Down | 2.13E-78  | 3.40E-77  |
| Unigene44517  | Potri.008G008100.1 | 7.3689  | 29.4038  | -1.9965 | Down | 1.47E-34  | 1.00E-33  |



|               |                    |         |          |         |      |           |           |
|---------------|--------------------|---------|----------|---------|------|-----------|-----------|
| Unigene38452  | Potri.007G069100.1 | 2.4775  | 9.8857   | -1.9965 | Down | 1.47E-23  | 7.35E-23  |
| Unigene313    | Potri.007G041000.1 | 17.7457 | 70.8111  | -1.9965 | Down | 9.15E-173 | 3.93E-171 |
| Unigene16334  | Potri.006G214900.1 | 9.7147  | 38.7639  | -1.9965 | Down | 1.47E-34  | 1.00E-33  |
| Unigene35293  | Potri.016G000600.1 | 8.9469  | 35.7051  | -1.9967 | Down | 1.69E-30  | 1.04E-29  |
| Unigene75035  | Potri.010G030200.1 | 12.0925 | 48.2589  | -1.9967 | Down | 1.69E-30  | 1.04E-29  |
| Unigene38588  | Potri.003G036900.5 | 6.8254  | 27.2389  | -1.9967 | Down | 1.69E-30  | 1.04E-29  |
| Unigene32956  | Potri.016G033300.1 | 11.6777 | 46.6085  | -1.9968 | Down | 6.74E-98  | 1.40E-96  |
| Unigene82113  | Potri.001G172400.1 | 55.5893 | 221.872  | -1.9968 | Down | 2.89E-158 | 1.11E-156 |
| Unigene24777  | Potri.016G067200.1 | 14.6684 | 58.547   | -1.9969 | Down | 2.43E-44  | 2.10E-43  |
| Unigene82468  | Potri.009G117300.2 | 28.1533 | 112.3954 | -1.9972 | Down | 1.01E-81  | 1.70E-80  |
| Unigene106769 | Potri.010G099900.1 | 1.4346  | 5.7278   | -1.9973 | Down | 2.29E-08  | 5.92E-08  |
| Unigene28524  | Potri.008G014400.1 | 1.6599  | 6.6274   | -1.9973 | Down | 2.29E-08  | 5.92E-08  |
| Unigene37519  | Potri.002G130100.1 | 4.0647  | 16.2286  | -1.9973 | Down | 2.16E-15  | 8.00E-15  |
| Unigene117439 | Potri.017G114100.2 | 1.7516  | 6.9936   | -1.9974 | Down | 2.29E-08  | 5.92E-08  |
| Unigene52885  | Potri.008G185100.2 | 4.3838  | 17.5043  | -1.9975 | Down | 1.25E-73  | 1.86E-72  |
| Unigene48236  | Potri.006G031800.1 | 6.5613  | 26.2011  | -1.9976 | Down | 4.34E-39  | 3.33E-38  |
| Unigene43366  | Potri.004G125900.1 | 4.12    | 16.4529  | -1.9976 | Down | 1.11E-62  | 1.39E-61  |
| Unigene33359  | Potri.018G151300.2 | 4.7339  | 18.9055  | -1.9977 | Down | 3.13E-25  | 1.65E-24  |
| Unigene35233  | Potri.016G020100.1 | 10.6048 | 42.3521  | -1.9977 | Down | 3.13E-25  | 1.65E-24  |
| Unigene84806  | Potri.002G111300.1 | 52.3781 | 209.1911 | -1.9978 | Down | 1.61E-162 | 6.44E-161 |
| Unigene31336  | Potri.017G054400.2 | 6.1914  | 24.7294  | -1.9979 | Down | 2.81E-18  | 1.17E-17  |
| Unigene49228  | Potri.003G055600.1 | 2.7755  | 11.0856  | -1.9979 | Down | 2.81E-18  | 1.17E-17  |
| Unigene37654  | Potri.014G051200.1 | 17.3797 | 69.4239  | -1.998  | Down | 1.40E-54  | 1.50E-53  |
| Unigene6182   | Potri.004G015300.2 | 20.4885 | 81.842   | -1.998  | Down | 5.36E-81  | 8.90E-80  |
| Unigene11839  | Potri.011G109600.3 | 3.1083  | 12.4171  | -1.9981 | Down | 1.14E-47  | 1.06E-46  |
| Unigene43698  | Potri.006G138000.1 | 35.2548 | 140.8381 | -1.9981 | Down | 8.78E-205 | 4.69E-203 |
| Unigene2236   | Potri.006G083900.3 | 18.2065 | 72.7301  | -1.9981 | Down | 3.06E-110 | 7.41E-109 |
| Unigene25422  | Potri.003G052400.1 | 13.2127 | 52.7824  | -1.9981 | Down | 1.34E-93  | 2.63E-92  |
| Unigene29847  | Potri.015G087100.1 | 4.3038  | 17.1946  | -1.9983 | Down | 2.77E-11  | 8.47E-11  |
| Unigene28449  | Potri.011G088100.1 | 2.6722  | 10.6761  | -1.9983 | Down | 2.77E-11  | 8.47E-11  |
| Unigene37536  | Potri.004G138400.6 | 3.0345  | 12.1237  | -1.9983 | Down | 2.77E-11  | 8.47E-11  |
| Unigene1201   | Potri.002G199500.1 | 3.0858  | 12.3299  | -1.9984 | Down | 1.29E-43  | 1.10E-42  |
| Unigene6933   | Potri.017G052300.1 | 16.1171 | 64.4121  | -1.9987 | Down | 3.58E-87  | 6.47E-86  |
| Unigene89990  | Potri.006G203000.7 | 57.2598 | 228.8385 | -1.9987 | Down | 1.52E-232 | 9.48E-231 |
| Unigene71781  | Potri.018G105100.1 | 17.0042 | 67.9603  | -1.9988 | Down | 1.47E-39  | 1.14E-38  |
| Unigene12673  | Potri.009G075200.2 | 2.0834  | 8.3267   | -1.9988 | Down | 3.49E-14  | 1.23E-13  |
| Unigene51615  | Potri.006G240300.1 | 11.6497 | 46.5708  | -1.9991 | Down | 3.86E-48  | 3.63E-47  |
| Unigene15634  | Potri.002G195800.1 | 24.0234 | 96.0358  | -1.9991 | Down | 1.55E-94  | 3.08E-93  |
| Unigene79549  | Potri.002G094200.1 | 23.3314 | 93.2694  | -1.9991 | Down | 1.28E-63  | 1.63E-62  |

|               |                    |         |          |         |      |           |           |
|---------------|--------------------|---------|----------|---------|------|-----------|-----------|
| Unigene37710  | Potri.001G352300.3 | 3.4072  | 13.6205  | -1.9991 | Down | 4.51E-17  | 1.79E-16  |
| Unigene29716  | Potri.001G272300.2 | 13.8828 | 55.5024  | -1.9993 | Down | 1.68E-35  | 1.18E-34  |
| Unigene31913  | Potri.008G014800.2 | 16.2649 | 65.0312  | -1.9994 | Down | 4.80E-279 | 3.83E-277 |
| Unigene15408  | Potri.012G133600.4 | 27.0657 | 108.2244 | -1.9995 | Down | 1.35E-83  | 2.33E-82  |
| Unigene13664  | Potri.005G225300.1 | 3.9253  | 15.6964  | -1.9996 | Down | 2.66E-89  | 4.94E-88  |
| Unigene32620  | Potri.003G142900.1 | 4.4411  | 17.759   | -1.9996 | Down | 3.91E-68  | 5.33E-67  |
| Unigene43582  | Potri.016G137700.1 | 7.4675  | 29.8646  | -1.9997 | Down | 2.10E-82  | 3.56E-81  |
| Unigene28032  | Potri.001G346000.2 | 6.8933  | 27.5701  | -1.9998 | Down | 1.94E-31  | 1.22E-30  |
| Unigene39363  | Potri.013G159200.1 | 3.2374  | 12.9498  | -2      | Down | 4.97E-40  | 3.90E-39  |
| Unigene113244 | Potri.004G222500.3 | 12.8772 | 51.5072  | -2      | Down | 3.62E-37  | 2.65E-36  |
| Unigene36643  | Potri.006G060600.1 | 14.2597 | 57.0417  | -2.0001 | Down | 9.04E-90  | 1.69E-88  |
| Unigene1111   | Potri.001G130100.4 | 7.5505  | 30.2067  | -2.0002 | Down | 6.80E-63  | 8.51E-62  |
| Unigene3339   | Potri.014G132800.2 | 4.8007  | 19.2064  | -2.0003 | Down | 2.59E-74  | 3.90E-73  |
| Unigene45116  | Potri.009G120500.2 | 4.3507  | 17.406   | -2.0003 | Down | 1.33E-68  | 1.82E-67  |
| Unigene92874  | Potri.006G082300.1 | 56.9309 | 227.7945 | -2.0004 | Down | 0         | 0         |
| Unigene115071 | Potri.009G149900.2 | 1.8518  | 7.41     | -2.0005 | Down | 3.87E-07  | 9.18E-07  |
| Unigene27452  | Potri.008G035600.2 | 0.9194  | 3.6789   | -2.0005 | Down | 3.73E-04  | 6.73E-04  |
| Unigene70465  | Potri.006G138000.1 | 88.0269 | 352.2233 | -2.0005 | Down | 4.96E-194 | 2.49E-192 |
| Unigene21036  | Potri.005G028700.1 | 0.8109  | 3.2448   | -2.0005 | Down | 3.87E-07  | 9.18E-07  |
| Unigene119300 | Potri.001G089600.1 | 0.7806  | 3.1235   | -2.0005 | Down | 3.87E-07  | 9.18E-07  |
| Unigene106018 | Potri.018G141000.1 | 0.989   | 3.9576   | -2.0006 | Down | 3.87E-07  | 9.18E-07  |
| Unigene4767   | Potri.017G087900.1 | 0.7657  | 3.064    | -2.0006 | Down | 3.73E-04  | 6.73E-04  |
| Unigene96870  | Potri.015G118600.1 | 1.5151  | 6.0628   | -2.0006 | Down | 4.55E-10  | 1.30E-09  |
| Unigene113680 | Potri.014G096300.1 | 1.012   | 4.0497   | -2.0006 | Down | 3.73E-04  | 6.73E-04  |
| Unigene23589  | Potri.013G022500.1 | 6.5685  | 26.2847  | -2.0006 | Down | 1.67E-24  | 8.63E-24  |
| Unigene119203 | Potri.013G002500.1 | 1.2634  | 5.0556   | -2.0006 | Down | 4.55E-10  | 1.30E-09  |
| Unigene27155  | Potri.012G142500.1 | 1.7465  | 6.9887   | -2.0006 | Down | 3.87E-07  | 9.18E-07  |
| Unigene114873 | Potri.012G067800.2 | 0.9392  | 3.7583   | -2.0006 | Down | 3.73E-04  | 6.73E-04  |
| Unigene83008  | Potri.010G166100.2 | 0.9816  | 3.9279   | -2.0006 | Down | 3.73E-04  | 6.73E-04  |
| Unigene323    | Potri.010G151600.1 | 1.8085  | 7.2368   | -2.0006 | Down | 1.67E-24  | 8.63E-24  |
| Unigene114690 | Potri.009G151500.2 | 0.9529  | 3.8132   | -2.0006 | Down | 3.73E-04  | 6.73E-04  |
| Unigene39353  | Potri.008G031200.4 | 11.8037 | 47.234   | -2.0006 | Down | 4.04E-73  | 5.96E-72  |
| Unigene46674  | Potri.007G091900.2 | 1.1158  | 4.465    | -2.0006 | Down | 3.73E-04  | 6.73E-04  |
| Unigene9166   | Potri.006G123600.3 | 1.9705  | 7.8854   | -2.0006 | Down | 3.87E-07  | 9.18E-07  |
| Unigene116710 | Potri.005G191400.7 | 0.7936  | 3.1757   | -2.0006 | Down | 3.73E-04  | 6.73E-04  |
| Unigene95563  | Potri.005G180100.2 | 1.1761  | 4.7064   | -2.0006 | Down | 3.73E-04  | 6.73E-04  |
| Unigene6427   | Potri.003G183800.1 | 1.3634  | 5.456    | -2.0006 | Down | 5.66E-13  | 1.88E-12  |
| Unigene24614  | Potri.003G079700.1 | 2.1489  | 8.5993   | -2.0006 | Down | 3.87E-07  | 9.18E-07  |
| Unigene14714  | Potri.003G054900.4 | 1.0239  | 4.0973   | -2.0006 | Down | 3.73E-04  | 6.73E-04  |

|               |                    |         |          |         |      |           |           |
|---------------|--------------------|---------|----------|---------|------|-----------|-----------|
| Unigene73534  | Potri.002G253600.3 | 1.2374  | 4.9517   | -2.0006 | Down | 3.73E-04  | 6.73E-04  |
| Unigene24860  | Potri.002G213100.1 | 7.7939  | 31.1885  | -2.0006 | Down | 1.67E-24  | 8.63E-24  |
| Unigene14388  | Potri.002G198600.2 | 11.6691 | 46.6957  | -2.0006 | Down | 2.05E-47  | 1.90E-46  |
| Unigene36960  | Potri.001G368700.1 | 1.1502  | 4.6027   | -2.0006 | Down | 3.73E-04  | 6.73E-04  |
| Unigene69277  | Potri.009G077600.2 | 1.3153  | 5.2636   | -2.0007 | Down | 3.87E-07  | 9.18E-07  |
| Unigene20085  | Potri.004G063500.1 | 1.3153  | 5.2636   | -2.0007 | Down | 3.87E-07  | 9.18E-07  |
| Unigene32123  | Potri.002G230900.2 | 5.4201  | 21.6937  | -2.0009 | Down | 1.23E-77  | 1.96E-76  |
| Unigene52192  | Potri.005G053900.3 | 45.5535 | 182.353  | -2.0011 | Down | 1.56E-179 | 7.07E-178 |
| Unigene80112  | Potri.012G011700.2 | 13.3429 | 53.4169  | -2.0012 | Down | 1.23E-37  | 9.09E-37  |
| Unigene44879  | Potri.004G173900.1 | 18.8002 | 75.2662  | -2.0013 | Down | 8.94E-104 | 2.00E-102 |
| Unigene9337   | Potri.001G209800.1 | 9.2112  | 36.8773  | -2.0013 | Down | 8.95E-35  | 6.16E-34  |
| Unigene4122   | Potri.016G041200.1 | 11.6688 | 46.7253  | -2.0015 | Down | 2.14E-72  | 3.12E-71  |
| Unigene101357 | Potri.006G121400.1 | 1.711   | 6.8511   | -2.0015 | Down | 3.57E-26  | 1.93E-25  |
| Unigene42653  | Potri.011G169200.1 | 7.2872  | 29.1802  | -2.0016 | Down | 5.84E-143 | 1.95E-141 |
| Unigene66127  | Potri.009G092300.1 | 3.0227  | 12.1047  | -2.0017 | Down | 2.66E-23  | 1.32E-22  |
| Unigene42748  | Potri.001G145300.1 | 6.8957  | 27.6156  | -2.0017 | Down | 1.28E-82  | 2.18E-81  |
| Unigene46584  | Potri.008G203100.1 | 37.0219 | 148.2764 | -2.0018 | Down | 4.93E-165 | 2.01E-163 |
| Unigene84962  | Potri.009G011700.2 | 79.0645 | 316.6707 | -2.0019 | Down | 2.19E-247 | 1.49E-245 |
| Unigene43404  | Potri.006G250800.2 | 1.8996  | 7.6085   | -2.0019 | Down | 1.93E-36  | 1.39E-35  |
| Unigene681    | Potri.005G133500.1 | 3.3026  | 13.2276  | -2.0019 | Down | 1.93E-36  | 1.39E-35  |
| Unigene17339  | Potri.017G130500.1 | 3.1971  | 12.8063  | -2.002  | Down | 1.51E-17  | 6.14E-17  |
| Unigene44935  | Potri.013G051200.1 | 5.3285  | 21.3438  | -2.002  | Down | 1.41E-33  | 9.41E-33  |
| Unigene27424  | Potri.008G178700.1 | 9.8289  | 39.3706  | -2.002  | Down | 1.41E-33  | 9.41E-33  |
| Unigene89360  | Potri.001G135900.2 | 20.5464 | 82.3002  | -2.002  | Down | 2.00E-81  | 3.34E-80  |
| Unigene25690  | Potri.015G046700.1 | 5.6434  | 22.6101  | -2.0023 | Down | 7.62E-28  | 4.35E-27  |
| Unigene23742  | Potri.012G088500.2 | 12.0972 | 48.4666  | -2.0023 | Down | 1.95E-119 | 5.22E-118 |
| Unigene8322   | Potri.006G140300.1 | 1.8679  | 7.4836   | -2.0023 | Down | 1.17E-14  | 4.19E-14  |
| Unigene31852  | Potri.005G195400.1 | 19.5088 | 78.1611  | -2.0023 | Down | 3.98E-289 | 3.37E-287 |
| Unigene28611  | Potri.008G119100.1 | 10.5899 | 42.4333  | -2.0025 | Down | 9.52E-85  | 1.67E-83  |
| Unigene19163  | Potri.001G353100.1 | 49.1366 | 196.8892 | -2.0025 | Down | 2.13E-237 | 1.37E-235 |
| Unigene50728  | Potri.001G156000.3 | 5.8873  | 23.5898  | -2.0025 | Down | 1.91E-61  | 2.33E-60  |
| Unigene79703  | Potri.009G144300.3 | 28.8919 | 115.7795 | -2.0026 | Down | 4.84E-79  | 7.83E-78  |
| Unigene103403 | Potri.008G193200.3 | 3.0372  | 12.1704  | -2.0026 | Down | 5.65E-25  | 2.95E-24  |
| Unigene37307  | Potri.002G036600.1 | 16.5604 | 66.3639  | -2.0027 | Down | 1.70E-45  | 1.51E-44  |
| Unigene19639  | Potri.001G050000.2 | 15.59   | 62.4754  | -2.0027 | Down | 1.70E-45  | 1.51E-44  |
| Unigene75403  | Potri.009G073800.1 | 16.9543 | 67.9495  | -2.0028 | Down | 1.23E-42  | 1.03E-41  |
| Unigene104406 | Potri.008G077100.1 | 4.0367  | 16.1785  | -2.0028 | Down | 9.22E-12  | 2.89E-11  |
| Unigene24262  | Potri.001G410500.1 | 3.2548  | 13.0444  | -2.0028 | Down | 1.23E-42  | 1.03E-41  |
| Unigene37362  | Potri.001G109200.3 | 1.4593  | 5.8486   | -2.0028 | Down | 9.22E-12  | 2.89E-11  |

|              |                    |         |          |         |      |           |           |
|--------------|--------------------|---------|----------|---------|------|-----------|-----------|
| Unigene18470 | Potri.002G040600.4 | 4.694   | 18.8147  | -2.003  | Down | 8.96E-40  | 6.99E-39  |
| Unigene19128 | Potri.008G041100.1 | 4.5307  | 18.1628  | -2.0032 | Down | 3.18E-19  | 1.38E-18  |
| Unigene85782 | Potri.007G087200.4 | 5.474   | 21.9441  | -2.0032 | Down | 3.18E-19  | 1.38E-18  |
| Unigene50269 | Potri.005G003600.3 | 8.1289  | 32.5899  | -2.0033 | Down | 3.04E-94  | 6.03E-93  |
| Unigene43748 | Potri.013G003200.1 | 5.1984  | 20.8432  | -2.0034 | Down | 1.93E-41  | 1.57E-40  |
| Unigene86608 | Potri.016G022400.1 | 16.3186 | 65.4331  | -2.0035 | Down | 3.34E-56  | 3.70E-55  |
| Unigene72022 | Potri.008G136500.1 | 24.1992 | 97.0326  | -2.0035 | Down | 3.34E-56  | 3.70E-55  |
| Unigene18989 | Potri.018G085900.1 | 7.7533  | 31.0903  | -2.0036 | Down | 8.88E-108 | 2.08E-106 |
| Unigene47695 | Potri.016G036900.1 | 42.0025 | 168.4284 | -2.0036 | Down | 8.88E-108 | 2.08E-106 |
| Unigene22017 | Potri.011G024000.2 | 4.0313  | 16.1657  | -2.0036 | Down | 7.33E-130 | 2.17E-128 |
| Unigene4826  | Potri.008G205900.4 | 1.6336  | 6.5509   | -2.0036 | Down | 7.56E-09  | 2.01E-08  |
| Unigene9434  | Potri.003G008600.1 | 1.119   | 4.4873   | -2.0036 | Down | 7.56E-09  | 2.01E-08  |
| Unigene10179 | Potri.015G040000.1 | 1.3786  | 5.5286   | -2.0037 | Down | 7.56E-09  | 2.01E-08  |
| Unigene2845  | Potri.013G032300.2 | 8.9818  | 36.0188  | -2.0037 | Down | 3.49E-31  | 2.19E-30  |
| Unigene27132 | Potri.010G098700.1 | 12.6083 | 50.5617  | -2.0037 | Down | 3.49E-31  | 2.19E-30  |
| Unigene53729 | Potri.005G175400.1 | 2.6124  | 10.4763  | -2.0037 | Down | 7.56E-09  | 2.01E-08  |
| Unigene50107 | Potri.001G379700.1 | 3.2944  | 13.211   | -2.0037 | Down | 1.41E-38  | 1.07E-37  |
| Unigene24676 | Potri.001G289800.1 | 2.5528  | 10.2373  | -2.0037 | Down | 7.56E-09  | 2.01E-08  |
| Unigene22375 | Potri.007G113600.1 | 7.6172  | 30.5492  | -2.0038 | Down | 3.07E-65  | 4.00E-64  |
| Unigene22077 | Potri.018G087500.4 | 3.8717  | 15.5303  | -2.004  | Down | 1.25E-47  | 1.16E-46  |
| Unigene12994 | Potri.003G096300.1 | 2.3934  | 9.6      | -2.004  | Down | 2.57E-28  | 1.49E-27  |
| Unigene62324 | Potri.001G215700.2 | 7.8802  | 31.6083  | -2.004  | Down | 1.22E-81  | 2.04E-80  |
| Unigene32829 | Potri.014G084600.1 | 2.2361  | 8.9699   | -2.0041 | Down | 6.71E-21  | 3.08E-20  |
| Unigene25104 | Potri.006G214900.1 | 13.2809 | 53.2758  | -2.0041 | Down | 3.03E-40  | 2.39E-39  |
| Unigene2033  | Potri.005G100700.1 | 8.7731  | 35.1918  | -2.0041 | Down | 6.68E-67  | 8.95E-66  |
| Unigene1973  | Potri.002G105700.2 | 6.7163  | 26.9409  | -2.0041 | Down | 1.25E-47  | 1.16E-46  |
| Unigene74573 | Potri.018G013400.2 | 13.1239 | 52.6501  | -2.0042 | Down | 7.50E-33  | 4.93E-32  |
| Unigene89624 | Potri.012G118500.1 | 18.7534 | 75.2356  | -2.0043 | Down | 6.20E-76  | 9.58E-75  |
| Unigene77350 | Potri.003G096700.2 | 63.1347 | 253.2886 | -2.0043 | Down | 6.85E-162 | 2.72E-160 |
| Unigene5626  | Potri.016G097300.2 | 8.8482  | 35.501   | -2.0044 | Down | 2.71E-49  | 2.60E-48  |
| Unigene35375 | Potri.009G169300.1 | 34.0324 | 136.5417 | -2.0044 | Down | 3.33E-104 | 7.48E-103 |
| Unigene32288 | Potri.005G121900.1 | 6.6199  | 26.5606  | -2.0044 | Down | 3.43E-61  | 4.16E-60  |
| Unigene53925 | Potri.019G034800.6 | 6.4242  | 25.7779  | -2.0045 | Down | 4.14E-82  | 6.97E-81  |
| Unigene27117 | Potri.001G161700.2 | 62.5946 | 251.1806 | -2.0046 | Down | 1.19E-300 | 1.06E-298 |
| Unigene28452 | Potri.001G024100.1 | 27.3795 | 109.8681 | -2.0046 | Down | 6.92E-115 | 1.77E-113 |
| Unigene10595 | Potri.004G218300.3 | 6.0282  | 24.1923  | -2.0047 | Down | 1.61E-34  | 1.10E-33  |
| Unigene20783 | Potri.008G193500.1 | 4.4404  | 17.8202  | -2.0048 | Down | 5.09E-18  | 2.10E-17  |
| Unigene15075 | Potri.015G019100.1 | 11.0575 | 44.3799  | -2.0049 | Down | 5.35E-60  | 6.36E-59  |
| Unigene23956 | Potri.010G156500.1 | 2.7609  | 11.0816  | -2.005  | Down | 1.42E-22  | 6.88E-22  |

|               |                    |         |          |         |      |           |           |
|---------------|--------------------|---------|----------|---------|------|-----------|-----------|
| Unigene40465  | Potri.011G078800.1 | 7.4599  | 29.9445  | -2.0051 | Down | 4.07E-27  | 2.27E-26  |
| Unigene47285  | Potri.006G156100.2 | 17.7385 | 71.2077  | -2.0051 | Down | 1.16E-61  | 1.42E-60  |
| Unigene2983   | Potri.003G107500.1 | 7.2268  | 29.0087  | -2.0051 | Down | 1.27E-52  | 1.31E-51  |
| Unigene89505  | Potri.018G134400.1 | 3.4479  | 13.8453  | -2.0056 | Down | 3.91E-15  | 1.43E-14  |
| Unigene15788  | Potri.018G023100.3 | 2.7911  | 11.2081  | -2.0056 | Down | 1.51E-10  | 4.45E-10  |
| Unigene51496  | Potri.016G140000.1 | 0.8805  | 3.5356   | -2.0056 | Down | 6.67E-06  | 1.44E-05  |
| Unigene82945  | Potri.014G024700.1 | 15.4828 | 62.1733  | -2.0056 | Down | 6.63E-47  | 6.07E-46  |
| Unigene15038  | Potri.014G023100.1 | 2.1941  | 8.8107   | -2.0056 | Down | 1.51E-10  | 4.45E-10  |
| Unigene9301   | Potri.012G080000.4 | 1.4296  | 5.7407   | -2.0056 | Down | 6.67E-06  | 1.44E-05  |
| Unigene54489  | Potri.012G025400.1 | 6.2355  | 25.0394  | -2.0056 | Down | 3.02E-24  | 1.54E-23  |
| Unigene49651  | Potri.007G049300.6 | 1.1241  | 4.514    | -2.0056 | Down | 6.67E-06  | 1.44E-05  |
| Unigene25699  | Potri.006G201600.1 | 8.8426  | 35.5085  | -2.0056 | Down | 3.02E-24  | 1.54E-23  |
| Unigene104205 | Potri.006G004800.1 | 1.2471  | 5.0079   | -2.0056 | Down | 6.67E-06  | 1.44E-05  |
| Unigene45506  | Potri.005G224900.1 | 6.4715  | 25.9873  | -2.0056 | Down | 6.63E-47  | 6.07E-46  |
| Unigene51232  | Potri.005G063700.1 | 1.0387  | 4.1711   | -2.0056 | Down | 6.67E-06  | 1.44E-05  |
| Unigene29901  | Potri.003G078000.4 | 3.3088  | 13.287   | -2.0056 | Down | 1.51E-10  | 4.45E-10  |
| Unigene30590  | Potri.003G073200.2 | 1.2984  | 5.2139   | -2.0056 | Down | 6.67E-06  | 1.44E-05  |
| Unigene114449 | Potri.001G392600.2 | 1.5196  | 6.1022   | -2.0056 | Down | 6.67E-06  | 1.44E-05  |
| Unigene94573  | Potri.015G053100.3 | 1.315   | 5.2807   | -2.0057 | Down | 6.67E-06  | 1.44E-05  |
| Unigene7223   | Potri.010G146700.1 | 0.9631  | 3.8676   | -2.0057 | Down | 6.67E-06  | 1.44E-05  |
| Unigene116969 | Potri.007G140900.1 | 1.2103  | 4.8602   | -2.0057 | Down | 6.67E-06  | 1.44E-05  |
| Unigene115523 | Potri.006G114300.4 | 1.4099  | 5.6618   | -2.0057 | Down | 6.67E-06  | 1.44E-05  |
| Unigene1523   | Potri.015G041900.1 | 2.0392  | 8.1927   | -2.0063 | Down | 2.26E-21  | 1.05E-20  |
| Unigene32243  | Potri.014G141000.2 | 8.521   | 34.2383  | -2.0065 | Down | 1.17E-197 | 6.00E-196 |
| Unigene38191  | Potri.014G000600.1 | 21.6214 | 86.8839  | -2.0066 | Down | 1.69E-88  | 3.10E-87  |
| Unigene5469   | Potri.010G110000.1 | 11.2202 | 45.0858  | -2.0066 | Down | 3.99E-32  | 2.57E-31  |
| Unigene39839  | Potri.014G005000.4 | 5.6217  | 22.5922  | -2.0067 | Down | 1.37E-27  | 7.78E-27  |
| Unigene43768  | Potri.006G078000.2 | 5.4043  | 21.7179  | -2.0067 | Down | 8.87E-69  | 1.22E-67  |
| Unigene10306  | Potri.004G087300.1 | 31.2835 | 125.7408 | -2.007  | Down | 2.17E-151 | 7.87E-150 |
| Unigene118741 | Potri.002G179300.1 | 2.0162  | 8.1039   | -2.007  | Down | 3.08E-12  | 9.88E-12  |
| Unigene79099  | Potri.003G180300.3 | 10.4128 | 41.8596  | -2.0072 | Down | 2.94E-29  | 1.75E-28  |
| Unigene92999  | Potri.013G110700.2 | 11.6739 | 46.9339  | -2.0073 | Down | 3.01E-69  | 4.18E-68  |
| Unigene20928  | Potri.013G060500.1 | 4.794   | 19.2738  | -2.0073 | Down | 1.71E-18  | 7.20E-18  |
| Unigene107206 | Potri.008G025000.1 | 2.0694  | 8.3198   | -2.0073 | Down | 1.71E-18  | 7.20E-18  |
| Unigene16465  | Potri.007G119300.1 | 18.0608 | 72.6154  | -2.0074 | Down | 1.50E-58  | 1.74E-57  |
| Unigene18956  | Potri.008G207000.2 | 4.1186  | 16.5616  | -2.0076 | Down | 6.29E-31  | 3.92E-30  |
| Unigene31849  | Potri.003G064000.4 | 6.1065  | 24.5546  | -2.0076 | Down | 3.73E-298 | 3.28E-296 |
| Unigene10119  | Potri.015G086800.2 | 17.3212 | 69.6614  | -2.0078 | Down | 3.12E-74  | 4.67E-73  |
| Unigene10616  | Potri.007G146500.2 | 14.2933 | 57.4841  | -2.0078 | Down | 4.17E-285 | 3.44E-283 |

|               |                    |         |          |         |      |           |           |
|---------------|--------------------|---------|----------|---------|------|-----------|-----------|
| Unigene113386 | Potri.007G106400.2 | 21.4399 | 86.2242  | -2.0078 | Down | 7.10E-62  | 8.72E-61  |
| Unigene6372   | Potri.004G157400.1 | 6.7081  | 26.977   | -2.0078 | Down | 1.65E-49  | 1.60E-48  |
| Unigene20760  | Potri.016G056300.1 | 1.4058  | 5.6542   | -2.0079 | Down | 1.27E-07  | 3.13E-07  |
| Unigene3347   | Potri.001G218700.5 | 0.9597  | 3.86     | -2.0079 | Down | 1.27E-07  | 3.13E-07  |
| Unigene55508  | Potri.013G043000.3 | 5.0633  | 20.3654  | -2.008  | Down | 6.33E-14  | 2.20E-13  |
| Unigene5025   | Potri.008G131600.1 | 2.5902  | 10.4184  | -2.008  | Down | 1.27E-07  | 3.13E-07  |
| Unigene23395  | Potri.003G002400.1 | 3.2341  | 13.0079  | -2.008  | Down | 3.58E-51  | 3.58E-50  |
| Unigene86775  | Potri.019G100800.3 | 18.7717 | 75.5114  | -2.0081 | Down | 3.36E-65  | 4.37E-64  |
| Unigene77317  | Potri.002G118900.1 | 29.8396 | 120.0315 | -2.0081 | Down | 1.48E-77  | 2.35E-76  |
| Unigene26866  | Potri.002G011800.1 | 24.162  | 97.1967  | -2.0082 | Down | 4.41E-110 | 1.07E-108 |
| Unigene34350  | Potri.016G051200.1 | 30.7812 | 123.8502 | -2.0085 | Down | 0         | 0         |
| Unigene42432  | Potri.013G021200.2 | 7.1928  | 28.9421  | -2.0085 | Down | 1.22E-265 | 9.11E-264 |
| Unigene40886  | Potri.001G292700.5 | 7.1674  | 28.8388  | -2.0085 | Down | 7.62E-22  | 3.60E-21  |
| Unigene35326  | Potri.011G044400.1 | 21.2222 | 85.3936  | -2.0086 | Down | 1.50E-110 | 3.65E-109 |
| Unigene23076  | Potri.002G148100.1 | 11.3446 | 45.6482  | -2.0086 | Down | 3.66E-56  | 4.05E-55  |
| Unigene42965  | Potri.015G033900.1 | 5.878   | 23.6548  | -2.0087 | Down | 7.95E-58  | 9.08E-57  |
| Unigene28533  | Potri.005G097500.6 | 7.7803  | 31.3099  | -2.0087 | Down | 9.92E-30  | 5.98E-29  |
| Unigene34304  | Potri.003G077600.1 | 7.1717  | 28.86    | -2.0087 | Down | 4.92E-92  | 9.46E-91  |
| Unigene85389  | Potri.001G230000.1 | 8.8068  | 35.4411  | -2.0087 | Down | 9.92E-30  | 5.98E-29  |
| Unigene15263  | Potri.001G207900.1 | 11.2728 | 45.3646  | -2.0087 | Down | 9.92E-30  | 5.98E-29  |
| Unigene36725  | Potri.001G087800.1 | 5.3965  | 21.7171  | -2.0087 | Down | 1.31E-15  | 4.91E-15  |
| Unigene39584  | Potri.007G058500.1 | 5.0017  | 20.1344  | -2.0092 | Down | 5.72E-55  | 6.17E-54  |
| Unigene21592  | Potri.001G357900.1 | 21.715  | 87.4128  | -2.0092 | Down | 4.76E-244 | 3.19E-242 |
| Unigene5526   | Potri.018G085600.1 | 7.4338  | 29.9281  | -2.0093 | Down | 3.44E-25  | 1.81E-24  |
| Unigene46277  | Potri.016G097600.1 | 5.0621  | 20.3796  | -2.0093 | Down | 2.74E-17  | 1.10E-16  |
| Unigene37608  | Potri.014G029400.1 | 1.9363  | 7.7955   | -2.0093 | Down | 2.50E-09  | 6.88E-09  |
| Unigene20802  | Potri.006G207000.1 | 2.2078  | 8.8883   | -2.0093 | Down | 2.74E-17  | 1.10E-16  |
| Unigene21758  | Potri.005G209000.3 | 3.1808  | 12.8059  | -2.0093 | Down | 6.26E-41  | 5.02E-40  |
| Unigene62609  | Potri.001G323100.3 | 4.9559  | 19.9521  | -2.0093 | Down | 2.74E-17  | 1.10E-16  |
| Unigene46991  | Potri.018G086000.2 | 14.6993 | 59.189   | -2.0096 | Down | 8.43E-68  | 1.14E-66  |
| Unigene72144  | Potri.007G035200.1 | 14.4853 | 58.3271  | -2.0096 | Down | 9.82E-35  | 6.75E-34  |
| Unigene34392  | Potri.007G137200.2 | 12.3321 | 49.6598  | -2.0097 | Down | 4.12E-52  | 4.20E-51  |
| Unigene25035  | Potri.002G179800.1 | 26.4488 | 106.5111 | -2.0097 | Down | 1.37E-146 | 4.77E-145 |
| Unigene51684  | Potri.014G146600.2 | 28.0189 | 112.8423 | -2.0098 | Down | 1.36E-132 | 4.15E-131 |
| Unigene97068  | Potri.014G068300.1 | 1.6319  | 6.572    | -2.0098 | Down | 5.75E-19  | 2.47E-18  |
| Unigene75355  | Potri.009G121400.2 | 7.1208  | 28.6776  | -2.0098 | Down | 5.75E-19  | 2.47E-18  |
| Unigene45504  | Potri.003G179100.1 | 2.3844  | 9.6029   | -2.0098 | Down | 5.75E-19  | 2.47E-18  |
| Unigene145    | Potri.002G230800.1 | 6.4366  | 25.9224  | -2.0098 | Down | 1.36E-132 | 4.15E-131 |
| Unigene42484  | Potri.004G216200.1 | 12.5333 | 50.4869  | -2.0101 | Down | 0         | 0         |

|               |                    |         |          |         |      |           |           |
|---------------|--------------------|---------|----------|---------|------|-----------|-----------|
| Unigene18795  | Potri.019G103000.1 | 5.9679  | 24.0412  | -2.0102 | Down | 9.82E-40  | 7.65E-39  |
| Unigene28903  | Potri.017G101800.1 | 3.3555  | 13.5173  | -2.0102 | Down | 3.35E-30  | 2.05E-29  |
| Unigene58380  | Potri.013G021300.3 | 1.4665  | 5.9076   | -2.0102 | Down | 5.03E-11  | 1.52E-10  |
| Unigene20642  | Potri.008G125800.1 | 5.1166  | 20.6119  | -2.0102 | Down | 3.35E-30  | 2.05E-29  |
| Unigene52105  | Potri.005G024600.2 | 11.3628 | 45.7739  | -2.0102 | Down | 9.82E-40  | 7.65E-39  |
| Unigene33470  | Potri.019G034500.3 | 17.8255 | 71.8227  | -2.0105 | Down | 2.96E-73  | 4.38E-72  |
| Unigene24600  | Potri.007G085700.2 | 7.0112  | 28.2505  | -2.0105 | Down | 2.57E-22  | 1.23E-21  |
| Unigene105468 | Potri.006G229300.7 | 12.2501 | 49.3586  | -2.0105 | Down | 6.55E-94  | 1.29E-92  |
| Unigene38456  | Potri.005G069000.1 | 2.5237  | 10.1687  | -2.0105 | Down | 2.57E-22  | 1.23E-21  |
| Unigene102727 | Potri.017G150900.1 | 2.3167  | 9.3349   | -2.0106 | Down | 2.57E-22  | 1.23E-21  |
| Unigene113075 | Potri.018G114700.1 | 4.0284  | 16.2348  | -2.0108 | Down | 1.03E-12  | 3.37E-12  |
| Unigene25935  | Potri.016G001100.1 | 38.3859 | 154.6935 | -2.0108 | Down | 2.13E-89  | 3.97E-88  |
| Unigene22675  | Potri.005G208600.2 | 7.9769  | 32.1482  | -2.0108 | Down | 4.66E-91  | 8.86E-90  |
| Unigene14722  | Potri.004G040200.1 | 3.786   | 15.2583  | -2.0108 | Down | 1.03E-12  | 3.37E-12  |
| Unigene22138  | Potri.001G211000.3 | 11.2862 | 45.4864  | -2.0109 | Down | 2.56E-137 | 8.20E-136 |
| Unigene31733  | Potri.002G128700.8 | 10.553  | 42.5375  | -2.0111 | Down | 1.01E-49  | 9.76E-49  |
| Unigene50871  | Potri.018G115500.1 | 2.4292  | 9.793    | -2.0113 | Down | 2.12E-14  | 7.52E-14  |
| Unigene105852 | Potri.010G081200.3 | 2.11    | 8.5064   | -2.0113 | Down | 2.12E-14  | 7.52E-14  |
| Unigene1470   | Potri.003G142500.2 | 25.419  | 102.4723 | -2.0113 | Down | 6.57E-154 | 2.44E-152 |
| Unigene6787   | Potri.003G045800.1 | 2.2322  | 8.999    | -2.0113 | Down | 2.12E-14  | 7.52E-14  |
| Unigene26989  | Potri.017G148800.1 | 10.1063 | 40.7465  | -2.0114 | Down | 7.18E-42  | 5.88E-41  |
| Unigene41739  | Potri.010G246500.2 | 2.7943  | 11.2665  | -2.0115 | Down | 5.29E-29  | 3.13E-28  |
| Unigene79495  | Potri.017G032200.1 | 16.1837 | 65.2594  | -2.0116 | Down | 3.36E-45  | 2.96E-44  |
| Unigene44692  | Potri.014G005000.4 | 8.3296  | 33.5866  | -2.0116 | Down | 4.84E-58  | 5.56E-57  |
| Unigene75491  | Potri.006G195600.1 | 17.7215 | 71.4606  | -2.0116 | Down | 3.36E-45  | 2.96E-44  |
| Unigene73016  | Potri.001G004500.1 | 38.9058 | 156.8953 | -2.0117 | Down | 5.38E-92  | 1.03E-90  |
| Unigene46310  | Potri.001G211700.2 | 16.7669 | 67.6193  | -2.0118 | Down | 3.54E-79  | 5.75E-78  |
| Unigene3966   | Potri.008G159800.1 | 8.3125  | 33.5259  | -2.0119 | Down | 5.22E-34  | 3.53E-33  |
| Unigene35069  | Potri.019G019700.1 | 10.4232 | 42.0413  | -2.012  | Down | 7.39E-52  | 7.50E-51  |
| Unigene21712  | Potri.019G014000.3 | 7.5535  | 30.4656  | -2.012  | Down | 1.12E-148 | 3.97E-147 |
| Unigene33541  | Potri.004G085600.4 | 4.6342  | 18.6922  | -2.012  | Down | 1.12E-35  | 7.93E-35  |
| Unigene14440  | Potri.009G051200.4 | 6.5566  | 26.45    | -2.0122 | Down | 5.22E-39  | 4.00E-38  |
| Unigene19529  | Potri.014G089400.1 | 6.7544  | 27.2483  | -2.0123 | Down | 5.22E-39  | 4.00E-38  |
| Unigene21286  | Potri.010G132600.1 | 7.1384  | 28.7994  | -2.0124 | Down | 1.16E-139 | 3.79E-138 |
| Unigene100396 | Potri.005G096900.2 | 2.0081  | 8.1015   | -2.0124 | Down | 4.08E-21  | 1.89E-20  |
| Unigene42416  | Potri.006G141900.1 | 6.0251  | 24.3097  | -2.0125 | Down | 1.73E-188 | 8.40E-187 |
| Unigene13924  | Potri.001G472700.1 | 9.1931  | 37.094   | -2.0126 | Down | 7.83E-132 | 2.37E-130 |
| Unigene24146  | Potri.001G068900.1 | 9.5554  | 38.5597  | -2.0127 | Down | 2.97E-96  | 6.04E-95  |
| Unigene35476  | Potri.011G053700.1 | 8.0317  | 32.4122  | -2.0128 | Down | 3.91E-26  | 2.12E-25  |

|               |                    |         |         |         |      |           |           |
|---------------|--------------------|---------|---------|---------|------|-----------|-----------|
| Unigene96838  | Potri.016G021500.1 | 8.9349  | 36.0597 | -2.0129 | Down | 8.36E-28  | 4.76E-27  |
| Unigene19628  | Potri.010G060000.1 | 9.0033  | 36.336  | -2.0129 | Down | 8.36E-28  | 4.76E-27  |
| Unigene11533  | Potri.008G128500.1 | 6.2386  | 25.178  | -2.0129 | Down | 4.08E-80  | 6.71E-79  |
| Unigene24883  | Potri.008G008100.1 | 7.0145  | 28.3096 | -2.0129 | Down | 8.36E-28  | 4.76E-27  |
| Unigene32411  | Potri.002G124100.1 | 6.0031  | 24.2319 | -2.0131 | Down | 5.73E-64  | 7.32E-63  |
| Unigene35817  | Potri.005G234900.1 | 9.4683  | 38.2275 | -2.0134 | Down | 8.23E-43  | 6.89E-42  |
| Unigene28470  | Potri.005G109400.1 | 10.3058 | 41.6113 | -2.0135 | Down | 3.28E-92  | 6.31E-91  |
| Unigene24356  | Potri.002G262300.1 | 18.7414 | 75.6805 | -2.0137 | Down | 2.15E-171 | 9.15E-170 |
| Unigene87338  | Potri.010G192900.2 | 19.8377 | 80.1145 | -2.0138 | Down | 4.37E-71  | 6.25E-70  |
| Unigene50213  | Potri.006G227600.2 | 10.5448 | 42.591  | -2.014  | Down | 1.27E-107 | 2.98E-106 |
| Unigene91144  | Potri.005G192400.2 | 21.17   | 85.5046 | -2.014  | Down | 1.16E-97  | 2.41E-96  |
| Unigene11418  | Potri.002G262300.1 | 7.5867  | 30.6461 | -2.0142 | Down | 0         | 0         |
| Unigene46049  | Potri.017G106500.1 | 1.228   | 4.9611  | -2.0143 | Down | 1.19E-04  | 2.26E-04  |
| Unigene17898  | Potri.011G058400.2 | 1.3165  | 5.3186  | -2.0143 | Down | 2.18E-06  | 4.86E-06  |
| Unigene4978   | Potri.007G145800.1 | 0.9384  | 3.7911  | -2.0143 | Down | 1.19E-04  | 2.26E-04  |
| Unigene106280 | Potri.007G085400.1 | 0.8131  | 3.2849  | -2.0143 | Down | 1.19E-04  | 2.26E-04  |
| Unigene38228  | Potri.T004100.1    | 2.9191  | 11.7935 | -2.0144 | Down | 1.31E-46  | 1.19E-45  |
| Unigene35762  | Potri.018G114300.2 | 2.3641  | 9.5511  | -2.0144 | Down | 1.48E-16  | 5.75E-16  |
| Unigene106580 | Potri.018G113100.1 | 0.7894  | 3.1893  | -2.0144 | Down | 1.19E-04  | 2.26E-04  |
| Unigene105016 | Potri.018G066500.1 | 0.8079  | 3.2641  | -2.0144 | Down | 2.18E-06  | 4.86E-06  |
| Unigene113281 | Potri.018G038300.1 | 1.1841  | 4.784   | -2.0144 | Down | 1.19E-04  | 2.26E-04  |
| Unigene117966 | Potri.017G088800.1 | 0.7535  | 3.0443  | -2.0144 | Down | 1.19E-04  | 2.26E-04  |
| Unigene112037 | Potri.016G048400.1 | 2.497   | 10.0883 | -2.0144 | Down | 4.19E-08  | 1.06E-07  |
| Unigene40899  | Potri.015G059000.2 | 0.8751  | 3.5354  | -2.0144 | Down | 1.19E-04  | 2.26E-04  |
| Unigene29418  | Potri.015G009800.1 | 2.2127  | 8.9395  | -2.0144 | Down | 3.43E-13  | 1.15E-12  |
| Unigene8776   | Potri.014G093400.1 | 0.9354  | 3.7792  | -2.0144 | Down | 1.19E-04  | 2.26E-04  |
| Unigene50562  | Potri.014G069600.4 | 2.2735  | 9.1852  | -2.0144 | Down | 7.09E-15  | 2.57E-14  |
| Unigene116588 | Potri.014G060200.2 | 1.842   | 7.4417  | -2.0144 | Down | 4.19E-08  | 1.06E-07  |
| Unigene24473  | Potri.013G152600.1 | 2.8308  | 11.4366 | -2.0144 | Down | 6.04E-30  | 3.66E-29  |
| Unigene41231  | Potri.013G142100.1 | 2.3312  | 9.4184  | -2.0144 | Down | 8.30E-10  | 2.34E-09  |
| Unigene39004  | Potri.013G051200.1 | 1.9696  | 7.9575  | -2.0144 | Down | 4.19E-08  | 1.06E-07  |
| Unigene62949  | Potri.012G060900.1 | 1.2297  | 4.968   | -2.0144 | Down | 2.18E-06  | 4.86E-06  |
| Unigene72633  | Potri.011G118200.3 | 18.7399 | 75.7113 | -2.0144 | Down | 6.03E-45  | 5.28E-44  |
| Unigene8790   | Potri.011G052800.2 | 10.9466 | 44.2256 | -2.0144 | Down | 1.31E-46  | 1.19E-45  |
| Unigene40141  | Potri.010G200200.1 | 3.2863  | 13.2771 | -2.0144 | Down | 3.09E-18  | 1.29E-17  |
| Unigene103505 | Potri.009G131200.1 | 4.2832  | 17.3046 | -2.0144 | Down | 1.38E-21  | 6.45E-21  |
| Unigene30217  | Potri.009G115600.2 | 1.093   | 4.416   | -2.0144 | Down | 4.19E-08  | 1.06E-07  |
| Unigene71791  | Potri.009G024600.4 | 9.5077  | 38.4123 | -2.0144 | Down | 2.92E-23  | 1.44E-22  |
| Unigene47986  | Potri.008G168100.3 | 2.2692  | 9.1677  | -2.0144 | Down | 4.19E-08  | 1.06E-07  |



|               |                    |         |          |         |      |           |           |
|---------------|--------------------|---------|----------|---------|------|-----------|-----------|
| Unigene17443  | Potri.008G079900.2 | 1.9631  | 7.9313   | -2.0144 | Down | 8.30E-10  | 2.34E-09  |
| Unigene45841  | Potri.008G052500.1 | 1.1093  | 4.4816   | -2.0144 | Down | 1.19E-04  | 2.26E-04  |
| Unigene25585  | Potri.007G004100.2 | 1.089   | 4.3998   | -2.0144 | Down | 4.19E-08  | 1.06E-07  |
| Unigene4965   | Potri.006G198300.1 | 1.9718  | 7.9662   | -2.0144 | Down | 2.18E-06  | 4.86E-06  |
| Unigene106328 | Potri.006G077000.2 | 0.8599  | 3.4742   | -2.0144 | Down | 1.19E-04  | 2.26E-04  |
| Unigene51748  | Potri.006G025400.3 | 1.0013  | 4.0455   | -2.0144 | Down | 1.19E-04  | 2.26E-04  |
| Unigene116670 | Potri.005G251700.1 | 0.9125  | 3.6867   | -2.0144 | Down | 1.19E-04  | 2.26E-04  |
| Unigene20308  | Potri.005G122400.1 | 1.1433  | 4.619    | -2.0144 | Down | 1.19E-04  | 2.26E-04  |
| Unigene15030  | Potri.005G070700.3 | 9.5447  | 38.5616  | -2.0144 | Down | 2.78E-33  | 1.85E-32  |
| Unigene37834  | Potri.004G173500.2 | 4.8412  | 19.5592  | -2.0144 | Down | 6.51E-20  | 2.89E-19  |
| Unigene67084  | Potri.003G223400.4 | 2.7629  | 11.1626  | -2.0144 | Down | 7.09E-15  | 2.57E-14  |
| Unigene114236 | Potri.003G091800.1 | 1.1218  | 4.5322   | -2.0144 | Down | 1.19E-04  | 2.26E-04  |
| Unigene25770  | Potri.003G071500.1 | 0.8094  | 3.27     | -2.0144 | Down | 2.18E-06  | 4.86E-06  |
| Unigene78035  | Potri.002G262700.1 | 1.2752  | 5.1519   | -2.0144 | Down | 1.19E-04  | 2.26E-04  |
| Unigene30916  | Potri.002G068600.1 | 4.9733  | 20.0926  | -2.0144 | Down | 1.38E-21  | 6.45E-21  |
| Unigene26247  | Potri.002G062700.1 | 0.8828  | 3.5667   | -2.0144 | Down | 2.18E-06  | 4.86E-06  |
| Unigene47737  | Potri.002G050800.1 | 4.4098  | 17.8161  | -2.0144 | Down | 1.68E-11  | 5.19E-11  |
| Unigene45763  | Potri.001G316800.1 | 1.6217  | 6.5519   | -2.0144 | Down | 2.18E-06  | 4.86E-06  |
| Unigene39440  | Potri.001G173500.1 | 3.3261  | 13.4377  | -2.0144 | Down | 6.20E-25  | 3.24E-24  |
| Unigene40328  | Potri.001G040900.1 | 1.6086  | 6.499    | -2.0144 | Down | 4.19E-08  | 1.06E-07  |
| Unigene95207  | Potri.001G026100.6 | 4.0107  | 16.2037  | -2.0144 | Down | 3.09E-18  | 1.29E-17  |
| Unigene118019 | Potri.005G172800.1 | 0.7441  | 3.0064   | -2.0145 | Down | 1.19E-04  | 2.26E-04  |
| Unigene345    | Potri.005G099200.2 | 7.7568  | 31.3485  | -2.0149 | Down | 1.23E-88  | 2.27E-87  |
| Unigene26285  | Potri.014G127700.1 | 77.9317 | 314.9913 | -2.015  | Down | 2.85E-254 | 2.01E-252 |
| Unigene23822  | Potri.001G336800.1 | 9.4071  | 38.0236  | -2.0151 | Down | 1.20E-120 | 3.26E-119 |
| Unigene22214  | Potri.015G034000.1 | 4.2887  | 17.3373  | -2.0153 | Down | 4.42E-47  | 4.07E-46  |
| Unigene6600   | Potri.010G090500.1 | 5.5462  | 22.4236  | -2.0154 | Down | 1.77E-77  | 2.81E-76  |
| Unigene90427  | Potri.001G146100.1 | 48.2355 | 195.035  | -2.0156 | Down | 4.02E-207 | 2.18E-205 |
| Unigene8372   | Potri.001G143900.3 | 7.4472  | 30.1133  | -2.0156 | Down | 1.55E-99  | 3.31E-98  |
| Unigene27248  | Potri.010G250800.2 | 12.4332 | 50.28    | -2.0158 | Down | 2.04E-30  | 1.25E-29  |
| Unigene17193  | Potri.008G101200.1 | 2.9388  | 11.8851  | -2.0159 | Down | 9.53E-29  | 5.58E-28  |
| Unigene50311  | Potri.011G132500.1 | 9.4803  | 38.3434  | -2.016  | Down | 2.52E-103 | 5.59E-102 |
| Unigene22797  | Potri.010G156700.1 | 6.268   | 25.351   | -2.016  | Down | 4.46E-27  | 2.49E-26  |
| Unigene80725  | Potri.002G048300.1 | 18.2022 | 73.6193  | -2.016  | Down | 1.53E-52  | 1.57E-51  |
| Unigene78689  | Potri.009G131800.1 | 35.7323 | 144.5317 | -2.0161 | Down | 1.10E-96  | 2.26E-95  |
| Unigene29475  | Potri.002G054400.1 | 8.4368  | 34.1255  | -2.0161 | Down | 3.25E-49  | 3.12E-48  |
| Unigene31291  | Potri.003G212400.1 | 5.2717  | 21.3249  | -2.0162 | Down | 9.83E-24  | 4.94E-23  |
| Unigene84110  | Potri.001G391400.1 | 21.5659 | 87.2384  | -2.0162 | Down | 5.62E-68  | 7.65E-67  |
| Unigene40182  | Potri.005G003800.1 | 10.879  | 44.0124  | -2.0164 | Down | 2.12E-83  | 3.64E-82  |

|               |                    |         |          |         |      |           |           |
|---------------|--------------------|---------|----------|---------|------|-----------|-----------|
| Unigene14463  | Potri.001G216600.1 | 5.2519  | 21.2474  | -2.0164 | Down | 4.63E-22  | 2.20E-21  |
| Unigene32843  | Potri.001G457300.1 | 2.8546  | 11.5498  | -2.0165 | Down | 2.19E-20  | 9.87E-20  |
| Unigene21759  | Potri.007G101200.1 | 5.3418  | 21.615   | -2.0166 | Down | 1.97E-73  | 2.93E-72  |
| Unigene81911  | Potri.018G151900.1 | 5.9505  | 24.0799  | -2.0167 | Down | 1.04E-18  | 4.41E-18  |
| Unigene50745  | Potri.018G063500.1 | 2.958   | 11.9701  | -2.0167 | Down | 1.04E-18  | 4.41E-18  |
| Unigene114328 | Potri.001G394300.1 | 5.7063  | 23.0915  | -2.0167 | Down | 1.04E-18  | 4.41E-18  |
| Unigene28905  | Potri.001G149000.1 | 8.7062  | 35.2335  | -2.0168 | Down | 7.21E-84  | 1.25E-82  |
| Unigene12498  | Potri.010G142200.1 | 6.6122  | 26.7597  | -2.0169 | Down | 3.18E-34  | 2.16E-33  |
| Unigene8303   | Potri.012G041300.2 | 3.5569  | 14.3962  | -2.017  | Down | 1.48E-32  | 9.64E-32  |
| Unigene50811  | Potri.009G008000.1 | 3.0002  | 12.1429  | -2.017  | Down | 4.95E-17  | 1.97E-16  |
| Unigene50694  | Potri.005G181900.1 | 1.7294  | 6.9997   | -2.017  | Down | 4.95E-17  | 1.97E-16  |
| Unigene75062  | Potri.003G090300.1 | 6.3018  | 25.5057  | -2.017  | Down | 4.95E-17  | 1.97E-16  |
| Unigene46252  | Potri.001G225400.1 | 4.4519  | 18.0185  | -2.017  | Down | 4.95E-17  | 1.97E-16  |
| Unigene52299  | Potri.013G061800.6 | 12.2008 | 49.3865  | -2.0171 | Down | 3.91E-60  | 4.66E-59  |
| Unigene29123  | Potri.018G113600.1 | 6.7911  | 27.4922  | -2.0173 | Down | 8.27E-57  | 9.27E-56  |
| Unigene4315   | Potri.016G026500.2 | 4.9039  | 19.8525  | -2.0173 | Down | 2.38E-15  | 8.79E-15  |
| Unigene42175  | Potri.006G067800.1 | 3.0243  | 12.2432  | -2.0173 | Down | 2.38E-15  | 8.79E-15  |
| Unigene78088  | Potri.004G059000.1 | 31.4269 | 127.2247 | -2.0173 | Down | 2.45E-84  | 4.26E-83  |
| Unigene69402  | Potri.001G231300.1 | 3.1561  | 12.7768  | -2.0173 | Down | 2.38E-15  | 8.79E-15  |
| Unigene35244  | Potri.001G156000.1 | 3.537   | 14.3189  | -2.0173 | Down | 2.38E-15  | 8.79E-15  |
| Unigene43239  | Potri.001G448900.1 | 4.3761  | 17.7169  | -2.0174 | Down | 3.81E-55  | 4.13E-54  |
| Unigene28269  | Potri.017G001100.1 | 13.1063 | 53.0684  | -2.0176 | Down | 8.46E-140 | 2.76E-138 |
| Unigene5026   | Potri.016G005500.1 | 6.309   | 25.5452  | -2.0176 | Down | 1.07E-39  | 8.36E-39  |
| Unigene13484  | Potri.017G125200.1 | 9.8935  | 40.0627  | -2.0177 | Down | 6.65E-147 | 2.32E-145 |
| Unigene104518 | Potri.006G121300.1 | 4.5449  | 18.4041  | -2.0177 | Down | 1.15E-13  | 3.94E-13  |
| Unigene56358  | Potri.005G218600.1 | 1.942   | 7.8639   | -2.0177 | Down | 1.15E-13  | 3.94E-13  |
| Unigene79710  | Potri.002G232200.1 | 29.8091 | 120.7203 | -2.0178 | Down | 3.81E-83  | 6.51E-82  |
| Unigene43079  | Potri.003G145600.1 | 3.7208  | 15.0695  | -2.0179 | Down | 2.19E-69  | 3.06E-68  |
| Unigene13885  | Potri.018G124100.1 | 2.8063  | 11.3667  | -2.0181 | Down | 1.07E-34  | 7.38E-34  |
| Unigene32204  | Potri.006G014400.1 | 8.8869  | 35.9964  | -2.0181 | Down | 2.55E-175 | 1.12E-173 |
| Unigene100172 | Potri.014G192800.3 | 1.3754  | 5.5714   | -2.0182 | Down | 5.59E-12  | 1.77E-11  |
| Unigene11000  | Potri.010G113700.1 | 1.9005  | 7.6985   | -2.0182 | Down | 5.00E-33  | 3.30E-32  |
| Unigene48957  | Potri.006G181800.1 | 2.1787  | 8.8257   | -2.0182 | Down | 5.59E-12  | 1.77E-11  |
| Unigene22053  | Potri.001G179500.2 | 5.4906  | 22.2407  | -2.0182 | Down | 1.68E-76  | 2.62E-75  |
| Unigene116066 | Potri.016G038200.2 | 8.6263  | 34.9493  | -2.0184 | Down | 2.33E-31  | 1.47E-30  |
| Unigene48086  | Potri.012G039200.1 | 15.4343 | 62.5296  | -2.0184 | Down | 7.85E-42  | 6.43E-41  |
| Unigene70063  | Potri.018G113500.1 | 11.4628 | 46.458   | -2.019  | Down | 2.24E-133 | 6.88E-132 |
| Unigene7074   | Potri.018G051100.1 | 4.554   | 18.4572  | -2.019  | Down | 5.08E-28  | 2.91E-27  |
| Unigene69931  | Potri.010G169200.3 | 1.6387  | 6.6415   | -2.019  | Down | 2.76E-10  | 8.00E-10  |

|               |                    |         |          |         |      |           |           |
|---------------|--------------------|---------|----------|---------|------|-----------|-----------|
| Unigene16289  | Potri.009G030000.2 | 2.967   | 12.0251  | -2.019  | Down | 2.76E-10  | 8.00E-10  |
| Unigene15118  | Potri.006G050700.1 | 6.6948  | 27.1336  | -2.019  | Down | 3.49E-19  | 1.51E-18  |
| Unigene31978  | Potri.006G226300.1 | 6.7673  | 27.431   | -2.0192 | Down | 8.51E-162 | 3.37E-160 |
| Unigene42811  | Potri.001G452200.1 | 3.5645  | 14.4489  | -2.0192 | Down | 1.94E-77  | 3.06E-76  |
| Unigene105900 | Potri.011G031900.1 | 1.3029  | 5.2819   | -2.0193 | Down | 2.38E-26  | 1.30E-25  |
| Unigene12094  | Potri.012G088500.2 | 7.8525  | 31.8365  | -2.0195 | Down | 2.45E-65  | 3.20E-64  |
| Unigene27192  | Potri.011G053700.1 | 9.3866  | 38.0562  | -2.0195 | Down | 2.45E-65  | 3.20E-64  |
| Unigene46349  | Potri.017G075600.1 | 8.9195  | 36.1667  | -2.0196 | Down | 1.12E-24  | 5.79E-24  |
| Unigene35697  | Potri.006G201600.1 | 7.9055  | 32.0553  | -2.0196 | Down | 9.12E-48  | 8.51E-47  |
| Unigene34315  | Potri.005G108000.2 | 7.4187  | 30.0834  | -2.0197 | Down | 7.87E-32  | 5.03E-31  |
| Unigene51934  | Potri.019G084000.1 | 1.6753  | 6.7949   | -2.02   | Down | 7.96E-16  | 3.01E-15  |
| Unigene17356  | Potri.014G113700.1 | 1.7862  | 7.2447   | -2.02   | Down | 1.38E-08  | 3.62E-08  |
| Unigene92869  | Potri.013G027300.1 | 1.2385  | 5.0232   | -2.02   | Down | 1.38E-08  | 3.62E-08  |
| Unigene16230  | Potri.006G168800.2 | 8.8684  | 35.97    | -2.02   | Down | 3.67E-30  | 2.24E-29  |
| Unigene5709   | Potri.005G178500.1 | 49.376  | 200.2673 | -2.02   | Down | 6.54E-137 | 2.08E-135 |
| Unigene39821  | Potri.018G050800.1 | 9.4464  | 38.3144  | -2.0201 | Down | 1.09E-58  | 1.27E-57  |
| Unigene28486  | Potri.009G164400.1 | 6.5505  | 26.5687  | -2.0201 | Down | 2.65E-37  | 1.95E-36  |
| Unigene51745  | Potri.007G140700.1 | 6.537   | 26.514   | -2.0201 | Down | 5.26E-23  | 2.58E-22  |
| Unigene43029  | Potri.019G066600.1 | 7.1877  | 29.1563  | -2.0202 | Down | 5.03E-57  | 5.66E-56  |
| Unigene38118  | Potri.003G144700.1 | 6.2491  | 25.3524  | -2.0204 | Down | 1.72E-28  | 9.97E-28  |
| Unigene2923   | Potri.002G076000.1 | 28.5813 | 115.9561 | -2.0204 | Down | 8.16E-268 | 6.18E-266 |
| Unigene43074  | Potri.001G125700.1 | 7.1167  | 28.8746  | -2.0205 | Down | 8.06E-61  | 9.72E-60  |
| Unigene44481  | Potri.011G002900.3 | 8.1825  | 33.2015  | -2.0206 | Down | 2.82E-66  | 3.74E-65  |
| Unigene8031   | Potri.016G047900.1 | 1.8314  | 7.432    | -2.0208 | Down | 3.84E-14  | 1.35E-13  |
| Unigene1199   | Potri.010G226900.1 | 4.1949  | 17.0232  | -2.0208 | Down | 4.92E-52  | 5.01E-51  |
| Unigene119483 | Potri.006G104000.3 | 1.2832  | 5.2075   | -2.0208 | Down | 3.84E-14  | 1.35E-13  |
| Unigene39607  | Potri.018G025600.2 | 5.0024  | 20.3019  | -2.0209 | Down | 6.59E-45  | 5.77E-44  |
| Unigene16161  | Potri.001G201800.1 | 36.7692 | 149.2185 | -2.0209 | Down | 5.77E-176 | 2.54E-174 |
| Unigene37325  | Potri.001G123500.1 | 20.1466 | 81.7651  | -2.0209 | Down | 4.22E-106 | 9.69E-105 |
| Unigene10800  | Potri.014G132900.1 | 7.0781  | 28.7308  | -2.0212 | Down | 8.83E-103 | 1.95E-101 |
| Unigene32459  | Potri.008G204100.1 | 11.8177 | 47.9722  | -2.0212 | Down | 1.14E-95  | 2.29E-94  |
| Unigene14354  | Potri.006G110700.1 | 20.5745 | 83.5166  | -2.0212 | Down | 9.56E-67  | 1.28E-65  |
| Unigene34465  | Potri.003G092600.1 | 4.3597  | 17.6967  | -2.0212 | Down | 3.05E-43  | 2.57E-42  |
| Unigene49858  | Potri.002G048300.1 | 6.3392  | 25.7336  | -2.0213 | Down | 1.18E-77  | 1.87E-76  |
| Unigene39074  | Potri.007G098400.2 | 52.5346 | 213.2969 | -2.0215 | Down | 5.50E-295 | 4.76E-293 |
| Unigene32789  | Potri.002G176700.1 | 4.0636  | 16.4981  | -2.0215 | Down | 1.41E-41  | 1.15E-40  |
| Unigene26406  | Potri.002G137200.1 | 20.3316 | 82.5448  | -2.0215 | Down | 8.31E-116 | 2.14E-114 |
| Unigene80489  | Potri.002G215800.2 | 31.8851 | 129.4677 | -2.0216 | Down | 1.09E-90  | 2.06E-89  |
| Unigene41406  | Potri.018G018700.1 | 1.3188  | 5.3556   | -2.0218 | Down | 5.59E-18  | 2.31E-17  |

|               |                    |         |          |         |      |           |           |
|---------------|--------------------|---------|----------|---------|------|-----------|-----------|
| Unigene4989   | Potri.015G053100.3 | 1.3582  | 5.5156   | -2.0218 | Down | 7.11E-07  | 1.65E-06  |
| Unigene40746  | Potri.014G015200.2 | 2.2192  | 9.0118   | -2.0218 | Down | 1.86E-12  | 6.05E-12  |
| Unigene32419  | Potri.009G164400.1 | 2.0009  | 8.1255   | -2.0218 | Down | 5.59E-18  | 2.31E-17  |
| Unigene6627   | Potri.007G127800.2 | 5.5896  | 22.6983  | -2.0218 | Down | 2.23E-45  | 1.98E-44  |
| Unigene91884  | Potri.005G082200.1 | 21.8914 | 88.8973  | -2.0218 | Down | 7.93E-111 | 1.93E-109 |
| Unigene63189  | Potri.002G160500.6 | 7.7672  | 31.5412  | -2.0218 | Down | 6.53E-40  | 5.11E-39  |
| Unigene30619  | Potri.002G067600.1 | 2.0722  | 8.4149   | -2.0218 | Down | 7.11E-07  | 1.65E-06  |
| Unigene36245  | Potri.002G048000.1 | 1.1147  | 4.5266   | -2.0218 | Down | 7.11E-07  | 1.65E-06  |
| Unigene17532  | Potri.001G197600.2 | 2.0901  | 8.4874   | -2.0218 | Down | 1.86E-12  | 6.05E-12  |
| Unigene23077  | Potri.007G007600.3 | 13.6364 | 55.3807  | -2.0219 | Down | 2.28E-87  | 4.14E-86  |
| Unigene35164  | Potri.004G233800.2 | 28.0493 | 113.9117 | -2.0219 | Down | 3.47E-238 | 2.24E-236 |
| Unigene44661  | Potri.008G101400.1 | 3.3094  | 13.4446  | -2.0224 | Down | 8.35E-22  | 3.94E-21  |
| Unigene32658  | Potri.003G187000.1 | 29.0757 | 118.1348 | -2.0225 | Down | 3.51E-273 | 2.72E-271 |
| Unigene44999  | Potri.001G070400.1 | 24.1832 | 98.255   | -2.0225 | Down | 7.23E-101 | 1.56E-99  |
| Unigene27322  | Potri.015G078500.1 | 10.2391 | 41.6035  | -2.0226 | Down | 1.45E-60  | 1.73E-59  |
| Unigene38316  | Potri.003G178300.1 | 35.1192 | 142.7036 | -2.0227 | Down | 4.53E-191 | 2.23E-189 |
| Unigene102616 | Potri.003G007700.5 | 25.7046 | 104.4514 | -2.0227 | Down | 4.61E-79  | 7.46E-78  |
| Unigene50332  | Potri.018G152600.2 | 2.8731  | 11.6754  | -2.0228 | Down | 1.27E-25  | 6.77E-25  |
| Unigene18680  | Potri.013G003400.1 | 9.3866  | 38.1449  | -2.0228 | Down | 1.20E-49  | 1.16E-48  |
| Unigene30220  | Potri.007G043300.2 | 19.0679 | 77.4872  | -2.0228 | Down | 1.20E-49  | 1.16E-48  |
| Unigene43857  | Potri.003G188200.1 | 3.674   | 14.9296  | -2.0228 | Down | 2.21E-40  | 1.75E-39  |
| Unigene36120  | Potri.012G118500.1 | 34.8642 | 141.6839 | -2.0229 | Down | 5.06E-116 | 1.31E-114 |
| Unigene326    | Potri.012G092500.4 | 5.6576  | 22.9943  | -2.023  | Down | 6.01E-72  | 8.71E-71  |
| Unigene26467  | Potri.016G070200.1 | 13.2889 | 54.0141  | -2.0231 | Down | 1.03E-38  | 7.79E-38  |
| Unigene36966  | Potri.012G128600.1 | 10.4667 | 42.543   | -2.0231 | Down | 5.55E-48  | 5.20E-47  |
| Unigene11813  | Potri.010G078200.1 | 4.0825  | 16.5939  | -2.0231 | Down | 1.96E-29  | 1.17E-28  |
| Unigene16002  | Potri.001G452200.1 | 4.9493  | 20.1168  | -2.0231 | Down | 5.55E-48  | 5.20E-47  |
| Unigene35179  | Potri.012G011700.2 | 25.6548 | 104.2855 | -2.0232 | Down | 4.90E-61  | 5.94E-60  |
| Unigene35324  | Potri.009G136900.1 | 21.6717 | 88.0912  | -2.0232 | Down | 2.97E-107 | 6.91E-106 |
| Unigene884    | Potri.018G071200.2 | 12.7432 | 51.8021  | -2.0233 | Down | 1.02E-214 | 5.74E-213 |
| Unigene21967  | Potri.004G162500.1 | 5.4489  | 22.1503  | -2.0233 | Down | 1.62E-42  | 1.34E-41  |
| Unigene46443  | Potri.001G174600.1 | 15.5951 | 63.3956  | -2.0233 | Down | 1.62E-42  | 1.34E-41  |
| Unigene33909  | Potri.017G073800.1 | 4.2697  | 17.3586  | -2.0234 | Down | 5.97E-24  | 3.02E-23  |
| Unigene14379  | Potri.004G082800.1 | 12.4009 | 50.4142  | -2.0234 | Down | 1.41E-55  | 1.54E-54  |
| Unigene31910  | Potri.016G030800.1 | 1.7356  | 7.0562   | -2.0235 | Down | 5.97E-24  | 3.02E-23  |
| Unigene51677  | Potri.010G056900.2 | 15.9293 | 64.7624  | -2.0235 | Down | 6.20E-104 | 1.39E-102 |
| Unigene3123   | Potri.014G134900.1 | 2.2124  | 8.9972   | -2.0239 | Down | 1.42E-31  | 8.98E-31  |
| Unigene39589  | Potri.004G002000.1 | 3.531   | 14.3595  | -2.0239 | Down | 1.42E-31  | 8.98E-31  |
| Unigene72319  | Potri.015G097200.1 | 42.0073 | 170.8847 | -2.0243 | Down | 2.01E-99  | 4.29E-98  |

|               |                    |         |          |         |      |           |           |
|---------------|--------------------|---------|----------|---------|------|-----------|-----------|
| Unigene10054  | Potri.002G045900.2 | 12.1269 | 49.3308  | -2.0243 | Down | 1.27E-140 | 4.17E-139 |
| Unigene12406  | Potri.001G205700.5 | 2.8169  | 11.4591  | -2.0243 | Down | 4.28E-26  | 2.32E-25  |
| Unigene74603  | Potri.001G009700.1 | 17.7864 | 72.3706  | -2.0246 | Down | 4.01E-45  | 3.52E-44  |
| Unigene6202   | Potri.T120400.3    | 2.238   | 9.1086   | -2.025  | Down | 4.57E-09  | 1.23E-08  |
| Unigene29959  | Potri.014G106400.8 | 4.3038  | 17.5166  | -2.025  | Down | 6.22E-13  | 2.06E-12  |
| Unigene12103  | Potri.014G098400.1 | 1.1055  | 4.4993   | -2.025  | Down | 6.22E-13  | 2.06E-12  |
| Unigene114082 | Potri.014G044900.2 | 1.2716  | 5.1754   | -2.025  | Down | 3.82E-05  | 7.65E-05  |
| Unigene83801  | Potri.008G049000.1 | 1.2297  | 5.0048   | -2.025  | Down | 3.82E-05  | 7.65E-05  |
| Unigene12934  | Potri.006G044500.2 | 1.8225  | 7.4175   | -2.025  | Down | 1.33E-20  | 6.04E-20  |
| Unigene48769  | Potri.006G023900.3 | 4.1039  | 16.7029  | -2.025  | Down | 1.33E-20  | 6.04E-20  |
| Unigene40601  | Potri.002G067900.1 | 2.2606  | 9.2007   | -2.025  | Down | 4.57E-09  | 1.23E-08  |
| Unigene107087 | Potri.001G130800.2 | 0.8645  | 3.5184   | -2.025  | Down | 6.22E-13  | 2.07E-12  |
| Unigene116452 | Potri.017G055100.2 | 1.049   | 4.2697   | -2.0251 | Down | 3.82E-05  | 7.65E-05  |
| Unigene5259   | Potri.016G035600.1 | 5.1965  | 21.1501  | -2.0251 | Down | 1.33E-20  | 6.04E-20  |
| Unigene27309  | Potri.012G047800.1 | 0.8128  | 3.3082   | -2.0251 | Down | 3.82E-05  | 7.65E-05  |
| Unigene25245  | Potri.006G020800.1 | 1.241   | 5.051    | -2.0251 | Down | 4.57E-09  | 1.23E-08  |
| Unigene109045 | Potri.001G084400.1 | 4.7729  | 19.426   | -2.0251 | Down | 6.22E-13  | 2.06E-12  |
| Unigene29323  | Potri.002G190800.1 | 9.9357  | 40.4484  | -2.0254 | Down | 3.44E-53  | 3.58E-52  |
| Unigene77540  | Potri.001G134000.2 | 55.9493 | 227.7739 | -2.0254 | Down | 2.06E-148 | 7.29E-147 |
| Unigene107238 | Potri.017G106400.2 | 2.5061  | 10.2033  | -2.0255 | Down | 5.44E-38  | 4.07E-37  |
| Unigene87021  | Potri.015G035800.1 | 65.3344 | 266.0001 | -2.0255 | Down | 1.67E-230 | 1.03E-228 |
| Unigene97639  | Potri.014G192500.1 | 1.3441  | 5.473    | -2.0257 | Down | 2.23E-30  | 1.37E-29  |
| Unigene10775  | Potri.010G126600.1 | 8.2909  | 33.7605  | -2.0257 | Down | 2.00E-183 | 9.37E-182 |
| Unigene45493  | Potri.008G073500.2 | 3.0052  | 12.2365  | -2.0257 | Down | 2.23E-30  | 1.37E-29  |
| Unigene33305  | Potri.011G138900.1 | 6.8216  | 27.779   | -2.0258 | Down | 9.95E-48  | 9.28E-47  |
| Unigene29038  | Potri.018G064800.3 | 2.949   | 12.0102  | -2.026  | Down | 3.97E-40  | 3.12E-39  |
| Unigene50328  | Potri.013G056600.2 | 4.6817  | 19.0672  | -2.026  | Down | 3.97E-40  | 3.12E-39  |
| Unigene31882  | Potri.004G235400.1 | 4.5652  | 18.5929  | -2.026  | Down | 3.91E-113 | 9.76E-112 |
| Unigene36193  | Potri.006G176100.1 | 11.4553 | 46.657   | -2.0261 | Down | 2.53E-36  | 1.81E-35  |
| Unigene18267  | Potri.005G000600.3 | 10.5833 | 43.1052  | -2.0261 | Down | 1.48E-105 | 3.37E-104 |
| Unigene6737   | Potri.001G193400.1 | 3.186   | 12.9765  | -2.0261 | Down | 6.30E-19  | 2.70E-18  |
| Unigene22769  | Potri.014G108600.1 | 6.6089  | 26.9202  | -2.0262 | Down | 2.20E-63  | 2.78E-62  |
| Unigene61296  | Potri.018G066300.2 | 2.3267  | 9.4784   | -2.0264 | Down | 4.30E-15  | 1.57E-14  |
| Unigene13064  | Potri.008G168100.3 | 9.0005  | 36.6673  | -2.0264 | Down | 1.58E-92  | 3.06E-91  |
| Unigene25203  | Potri.008G127300.1 | 5.5596  | 22.6518  | -2.0266 | Down | 6.78E-25  | 3.54E-24  |
| Unigene43498  | Potri.002G215400.1 | 4.8184  | 19.6329  | -2.0266 | Down | 1.14E-156 | 4.32E-155 |
| Unigene65921  | Potri.016G114600.1 | 3.8384  | 15.6426  | -2.0269 | Down | 4.47E-21  | 2.06E-20  |
| Unigene37913  | Potri.013G031900.1 | 2.8036  | 11.4252  | -2.0269 | Down | 3.05E-11  | 9.31E-11  |
| Unigene50558  | Potri.008G149900.2 | 18.2387 | 74.3306  | -2.027  | Down | 7.79E-105 | 1.76E-103 |

|               |                    |          |          |         |      |           |           |
|---------------|--------------------|----------|----------|---------|------|-----------|-----------|
| Unigene75915  | Potri.019G055000.2 | 10.0358  | 40.906   | -2.0272 | Down | 4.88E-27  | 2.71E-26  |
| Unigene17020  | Potri.001G197300.1 | 6.0266   | 24.5674  | -2.0273 | Down | 5.46E-33  | 3.60E-32  |
| Unigene46730  | Potri.016G045200.1 | 3.7946   | 15.4701  | -2.0275 | Down | 6.23E-39  | 4.76E-38  |
| Unigene91881  | Potri.004G158200.1 | 151.6399 | 618.2898 | -2.0276 | Down | 0         | 0         |
| Unigene89904  | Potri.002G239900.1 | 53.6181  | 218.6163 | -2.0276 | Down | 3.06E-225 | 1.83E-223 |
| Unigene22437  | Potri.011G136700.3 | 4.2101   | 17.1687  | -2.0279 | Down | 6.16E-53  | 6.39E-52  |
| Unigene17797  | Potri.009G001700.3 | 1.8717   | 7.6337   | -2.028  | Down | 2.08E-13  | 7.06E-13  |
| Unigene26907  | Potri.016G130700.1 | 1.7121   | 6.983    | -2.0281 | Down | 2.33E-07  | 5.63E-07  |
| Unigene607    | Potri.016G090800.2 | 12.4105  | 50.6172  | -2.0281 | Down | 1.07E-155 | 4.04E-154 |
| Unigene5161   | Potri.008G035600.8 | 1.0856   | 4.4279   | -2.0281 | Down | 2.33E-07  | 5.63E-07  |
| Unigene51585  | Potri.005G082200.1 | 11.6561  | 47.5405  | -2.0281 | Down | 2.54E-31  | 1.60E-30  |
| Unigene40969  | Potri.004G030500.1 | 1.4113   | 5.7563   | -2.0281 | Down | 2.33E-07  | 5.63E-07  |
| Unigene1119   | Potri.004G028400.2 | 1.7121   | 6.983    | -2.0281 | Down | 2.12E-19  | 9.23E-19  |
| Unigene117792 | Potri.002G050900.1 | 2.7198   | 11.0928  | -2.0281 | Down | 2.08E-13  | 7.06E-13  |
| Unigene13320  | Potri.008G132400.1 | 12.3145  | 50.2315  | -2.0282 | Down | 5.58E-75  | 8.48E-74  |
| Unigene1161   | Potri.003G074000.1 | 2.6332   | 10.7418  | -2.0283 | Down | 2.44E-45  | 2.15E-44  |
| Unigene35493  | Potri.013G022500.1 | 10.9401  | 44.6399  | -2.0287 | Down | 1.54E-55  | 1.68E-54  |
| Unigene32160  | Potri.006G095600.1 | 14.6646  | 59.8383  | -2.0287 | Down | 2.94E-298 | 2.59E-296 |
| Unigene7297   | Potri.003G102100.1 | 9.7123   | 39.6286  | -2.0287 | Down | 1.54E-41  | 1.25E-40  |
| Unigene39248  | Potri.011G121800.2 | 7.1559   | 29.2008  | -2.0288 | Down | 1.31E-49  | 1.27E-48  |
| Unigene48692  | Potri.004G153700.2 | 15.3381  | 62.5938  | -2.0289 | Down | 1.13E-57  | 1.29E-56  |
| Unigene29422  | Potri.019G001100.3 | 3.6151   | 14.7544  | -2.029  | Down | 9.77E-38  | 7.26E-37  |
| Unigene7212   | Potri.005G254000.1 | 1.8978   | 7.7461   | -2.0291 | Down | 1.07E-23  | 5.40E-23  |
| Unigene84440  | Potri.013G077900.1 | 19.0523  | 77.7685  | -2.0292 | Down | 6.15E-62  | 7.56E-61  |
| Unigene43679  | Potri.006G084800.1 | 2.4739   | 10.0976  | -2.0292 | Down | 8.25E-46  | 7.37E-45  |
| Unigene82128  | Potri.019G100000.1 | 16.4176  | 67.0271  | -2.0295 | Down | 4.44E-50  | 4.34E-49  |
| Unigene3300   | Potri.014G136800.1 | 3.3488   | 13.672   | -2.0295 | Down | 3.35E-66  | 4.44E-65  |
| Unigene51747  | Potri.010G048700.1 | 1.3271   | 5.4182   | -2.0295 | Down | 1.51E-09  | 4.20E-09  |
| Unigene46616  | Potri.009G097200.1 | 2.9777   | 12.1569  | -2.0295 | Down | 1.51E-09  | 4.20E-09  |
| Unigene45420  | Potri.009G083900.1 | 17.184   | 70.1561  | -2.0295 | Down | 4.08E-235 | 2.57E-233 |
| Unigene28503  | Potri.009G063800.1 | 2.316    | 9.4553   | -2.0295 | Down | 1.51E-09  | 4.20E-09  |
| Unigene29490  | Potri.008G079900.2 | 2.6345   | 10.7559  | -2.0295 | Down | 7.71E-26  | 4.14E-25  |
| Unigene43826  | Potri.006G027300.1 | 45.2631  | 184.7933 | -2.0295 | Down | 2.45E-283 | 1.99E-281 |
| Unigene30923  | Potri.002G173300.1 | 2.7257   | 11.1282  | -2.0295 | Down | 7.71E-26  | 4.14E-25  |
| Unigene46908  | Potri.002G099100.1 | 3.2659   | 13.3333  | -2.0295 | Down | 1.51E-09  | 4.20E-09  |
| Unigene103447 | Potri.001G448800.2 | 3.4236   | 13.9775  | -2.0295 | Down | 1.01E-17  | 4.12E-17  |
| Unigene19721  | Potri.001G198700.6 | 1.8456   | 7.5347   | -2.0295 | Down | 1.51E-09  | 4.20E-09  |
| Unigene39718  | Potri.013G070200.1 | 3.284    | 13.4096  | -2.0297 | Down | 4.54E-36  | 3.24E-35  |
| Unigene33337  | Potri.018G047700.8 | 2.9648   | 12.1071  | -2.0298 | Down | 5.55E-28  | 3.18E-27  |

|               |                    |         |          |         |      |           |           |
|---------------|--------------------|---------|----------|---------|------|-----------|-----------|
| Unigene43017  | Potri.015G144600.1 | 9.4007  | 38.3883  | -2.0298 | Down | 2.40E-54  | 2.56E-53  |
| Unigene26189  | Potri.013G009400.1 | 34.1024 | 139.254  | -2.0298 | Down | 1.32E-191 | 6.50E-190 |
| Unigene30437  | Potri.019G041600.1 | 12.4894 | 51.0043  | -2.0299 | Down | 1.54E-64  | 1.98E-63  |
| Unigene17372  | Potri.002G082700.1 | 26.4749 | 108.1207 | -2.0299 | Down | 7.21E-174 | 3.12E-172 |
| Unigene43728  | Potri.002G007300.1 | 1.4878  | 6.0762   | -2.03   | Down | 7.12E-20  | 3.16E-19  |
| Unigene21774  | Potri.002G258600.1 | 12.7841 | 52.2165  | -2.0302 | Down | 5.87E-146 | 2.03E-144 |
| Unigene5017   | Potri.019G085100.3 | 3.6316  | 14.8351  | -2.0303 | Down | 5.07E-22  | 2.41E-21  |
| Unigene49015  | Potri.014G113700.1 | 1.9087  | 7.7971   | -2.0303 | Down | 1.01E-11  | 3.17E-11  |
| Unigene19967  | Potri.009G115300.1 | 7.7506  | 31.6611  | -2.0303 | Down | 5.07E-22  | 2.41E-21  |
| Unigene20302  | Potri.005G040300.1 | 2.0579  | 8.4066   | -2.0303 | Down | 1.01E-11  | 3.17E-11  |
| Unigene37062  | Potri.015G045900.1 | 2.4064  | 9.8303   | -2.0304 | Down | 1.01E-11  | 3.17E-11  |
| Unigene46709  | Potri.008G089100.1 | 1.5198  | 6.2086   | -2.0304 | Down | 1.01E-11  | 3.17E-11  |
| Unigene12291  | Potri.004G211300.1 | 1.3522  | 5.5239   | -2.0304 | Down | 1.01E-11  | 3.17E-11  |
| Unigene13146  | Potri.003G007900.1 | 1.5263  | 6.235    | -2.0304 | Down | 5.07E-22  | 2.41E-21  |
| Unigene2812   | Potri.010G158200.1 | 11.2548 | 45.982   | -2.0305 | Down | 1.93E-185 | 9.16E-184 |
| Unigene10553  | Potri.015G126800.1 | 6.3977  | 26.1399  | -2.0306 | Down | 3.62E-24  | 1.85E-23  |
| Unigene39026  | Potri.003G082800.1 | 5.553   | 22.6888  | -2.0306 | Down | 3.62E-24  | 1.85E-23  |
| Unigene19025  | Potri.004G211300.3 | 3.3506  | 13.6902  | -2.0307 | Down | 3.62E-24  | 1.85E-23  |
| Unigene53562  | Potri.T041500.5    | 10.1567 | 41.5058  | -2.0309 | Down | 2.60E-26  | 1.42E-25  |
| Unigene5339   | Potri.002G084100.3 | 11.1514 | 45.5709  | -2.0309 | Down | 2.40E-63  | 3.02E-62  |
| Unigene2573   | Potri.014G132800.2 | 3.4111  | 13.941   | -2.031  | Down | 8.16E-41  | 6.53E-40  |
| Unigene52489  | Potri.017G056900.2 | 3.3112  | 13.535   | -2.0313 | Down | 4.82E-16  | 1.84E-15  |
| Unigene2987   | Potri.014G052600.1 | 3.0021  | 12.2727  | -2.0314 | Down | 9.81E-33  | 6.43E-32  |
| Unigene43416  | Potri.018G081600.2 | 2.844   | 11.6274  | -2.0315 | Down | 7.13E-35  | 4.92E-34  |
| Unigene47843  | Potri.008G125800.1 | 13.1447 | 53.7417  | -2.0316 | Down | 1.73E-51  | 1.74E-50  |
| Unigene58173  | Potri.004G143700.1 | 1.0713  | 4.3805   | -2.0317 | Down | 2.40E-20  | 1.08E-19  |
| Unigene33918  | Potri.006G133000.6 | 7.8903  | 32.2641  | -2.0318 | Down | 3.78E-39  | 2.91E-38  |
| Unigene41545  | Potri.001G148100.1 | 12.0446 | 49.2548  | -2.0319 | Down | 2.76E-41  | 2.24E-40  |
| Unigene12017  | Potri.002G003100.3 | 2.4979  | 10.219   | -2.0325 | Down | 3.32E-33  | 2.20E-32  |
| Unigene49553  | Potri.010G076100.1 | 20.5708 | 84.1647  | -2.0326 | Down | 3.79E-111 | 9.28E-110 |
| Unigene76294  | Potri.011G127000.3 | 46.9145 | 191.996  | -2.033  | Down | 2.93E-122 | 8.06E-121 |
| Unigene42370  | Potri.002G201400.1 | 7.3142  | 29.9402  | -2.0333 | Down | 0         | 0         |
| Unigene65748  | Potri.T131800.2    | 6.431   | 26.3282  | -2.0335 | Down | 2.96E-27  | 1.66E-26  |
| Unigene101350 | Potri.T077100.1    | 1.535   | 6.2841   | -2.0335 | Down | 1.23E-05  | 2.59E-05  |
| Unigene35421  | Potri.T013900.1    | 1.743   | 7.1357   | -2.0335 | Down | 1.23E-05  | 2.59E-05  |
| Unigene43992  | Potri.019G018300.1 | 2.0722  | 8.4835   | -2.0335 | Down | 1.14E-18  | 4.82E-18  |
| Unigene118301 | Potri.018G068600.1 | 1.3134  | 5.3769   | -2.0335 | Down | 7.66E-08  | 1.92E-07  |
| Unigene103572 | Potri.014G079100.2 | 1.329   | 5.4408   | -2.0335 | Down | 2.32E-14  | 8.22E-14  |
| Unigene43657  | Potri.013G144300.3 | 1.0304  | 4.2183   | -2.0335 | Down | 5.01E-10  | 1.43E-09  |

|               |                    |         |          |         |      |           |           |
|---------------|--------------------|---------|----------|---------|------|-----------|-----------|
| Unigene64935  | Potri.012G143900.1 | 6.5576  | 26.8467  | -2.0335 | Down | 4.94E-55  | 5.34E-54  |
| Unigene17950  | Potri.012G034600.1 | 1.1904  | 4.8735   | -2.0335 | Down | 7.66E-08  | 1.92E-07  |
| Unigene16713  | Potri.011G121600.4 | 8.55    | 35.0037  | -2.0335 | Down | 8.14E-36  | 5.77E-35  |
| Unigene18744  | Potri.011G082800.4 | 2.0814  | 8.5214   | -2.0335 | Down | 5.74E-23  | 2.82E-22  |
| Unigene12769  | Potri.010G133600.1 | 1.4755  | 6.0405   | -2.0335 | Down | 3.38E-12  | 1.08E-11  |
| Unigene52906  | Potri.010G089600.3 | 2.5316  | 10.3645  | -2.0335 | Down | 7.66E-08  | 1.92E-07  |
| Unigene88801  | Potri.009G097600.1 | 3.2815  | 13.4344  | -2.0335 | Down | 2.32E-14  | 8.22E-14  |
| Unigene17622  | Potri.009G081800.1 | 1.2545  | 5.1358   | -2.0335 | Down | 7.66E-08  | 1.92E-07  |
| Unigene119550 | Potri.007G054500.1 | 1.0411  | 4.2621   | -2.0335 | Down | 1.62E-16  | 6.29E-16  |
| Unigene46729  | Potri.006G240300.1 | 8.5637  | 35.0595  | -2.0335 | Down | 4.33E-40  | 3.40E-39  |
| Unigene38190  | Potri.006G174900.1 | 1.5995  | 6.5482   | -2.0335 | Down | 3.38E-12  | 1.08E-11  |
| Unigene46934  | Potri.005G108500.1 | 5.133   | 21.0143  | -2.0335 | Down | 2.32E-14  | 8.22E-14  |
| Unigene25931  | Potri.004G198900.1 | 1.4457  | 5.9188   | -2.0335 | Down | 7.66E-08  | 1.92E-07  |
| Unigene84338  | Potri.003G207300.1 | 30.2975 | 124.0374 | -2.0335 | Down | 1.19E-97  | 2.47E-96  |
| Unigene31466  | Potri.003G062800.3 | 3.8586  | 15.7969  | -2.0335 | Down | 2.32E-14  | 8.22E-14  |
| Unigene103150 | Potri.002G216100.2 | 1.3385  | 5.4798   | -2.0335 | Down | 7.66E-08  | 1.92E-07  |
| Unigene30387  | Potri.001G398600.1 | 3.4697  | 14.205   | -2.0335 | Down | 5.01E-10  | 1.43E-09  |
| Unigene59900  | Potri.001G120900.1 | 3.3155  | 13.5737  | -2.0335 | Down | 5.01E-10  | 1.43E-09  |
| Unigene33182  | Potri.005G236700.2 | 1.2237  | 5.01     | -2.0336 | Down | 3.38E-12  | 1.08E-11  |
| Unigene32735  | Potri.010G059000.1 | 7.6497  | 31.324   | -2.0338 | Down | 3.75E-115 | 9.58E-114 |
| Unigene81478  | Potri.003G007700.5 | 63.9212 | 261.7554 | -2.0339 | Down | 5.78E-188 | 2.78E-186 |
| Unigene29258  | Potri.005G213300.3 | 6.3018  | 25.8115  | -2.0342 | Down | 4.21E-49  | 4.04E-48  |
| Unigene25596  | Potri.004G130300.1 | 6.0289  | 24.6964  | -2.0343 | Down | 1.46E-40  | 1.16E-39  |
| Unigene28708  | Potri.016G144200.2 | 8.5313  | 34.9483  | -2.0344 | Down | 3.69E-75  | 5.63E-74  |
| Unigene108834 | Potri.009G125300.1 | 14.387  | 58.9383  | -2.0344 | Down | 2.75E-36  | 1.97E-35  |
| Unigene32110  | Potri.003G187600.1 | 3.2174  | 13.1797  | -2.0344 | Down | 2.73E-77  | 4.30E-76  |
| Unigene12548  | Potri.T124300.1    | 2.6543  | 10.8741  | -2.0345 | Down | 3.79E-34  | 2.57E-33  |
| Unigene68902  | Potri.001G394400.3 | 4.4432  | 18.203   | -2.0345 | Down | 3.79E-34  | 2.57E-33  |
| Unigene32292  | Potri.009G134300.8 | 8.7836  | 35.9868  | -2.0346 | Down | 2.27E-62  | 2.81E-61  |
| Unigene43531  | Potri.018G109500.1 | 4.5551  | 18.6646  | -2.0347 | Down | 7.71E-54  | 8.14E-53  |
| Unigene45942  | Potri.001G200200.2 | 7.4374  | 30.4728  | -2.0347 | Down | 7.20E-30  | 4.36E-29  |
| Unigene37484  | Potri.004G003800.1 | 4.824   | 19.7678  | -2.0349 | Down | 1.39E-25  | 7.39E-25  |
| Unigene91992  | Potri.018G027700.1 | 25.4202 | 104.1772 | -2.035  | Down | 2.14E-132 | 6.52E-131 |
| Unigene34459  | Potri.010G054300.8 | 3.5206  | 14.4287  | -2.035  | Down | 5.68E-65  | 7.36E-64  |
| Unigene77841  | Potri.003G222200.2 | 39.2206 | 160.7408 | -2.0351 | Down | 2.20E-106 | 5.06E-105 |
| Unigene87934  | Potri.017G123700.1 | 51.6455 | 211.6833 | -2.0352 | Down | 7.68E-194 | 3.84E-192 |
| Unigene108191 | Potri.019G041900.1 | 6.5502  | 26.8555  | -2.0356 | Down | 5.42E-17  | 2.15E-16  |
| Unigene110756 | Potri.019G053000.1 | 10.2326 | 41.9633  | -2.036  | Down | 3.37E-28  | 1.94E-27  |
| Unigene53778  | Potri.015G066000.1 | 12.1714 | 49.9143  | -2.036  | Down | 1.68E-41  | 1.36E-40  |



|               |                    |         |          |         |      |           |           |
|---------------|--------------------|---------|----------|---------|------|-----------|-----------|
| Unigene12837  | Potri.001G022700.1 | 9.5491  | 39.1621  | -2.036  | Down | 3.62E-79  | 5.87E-78  |
| Unigene77379  | Potri.011G147400.2 | 13.402  | 54.972   | -2.0362 | Down | 3.15E-37  | 2.31E-36  |
| Unigene36530  | Potri.006G231000.3 | 8.1612  | 33.4768  | -2.0363 | Down | 1.63E-59  | 1.92E-58  |
| Unigene5608   | Potri.017G007200.1 | 15.094  | 61.9196  | -2.0364 | Down | 3.04E-46  | 2.74E-45  |
| Unigene107796 | Potri.015G008100.2 | 4.7773  | 19.5977  | -2.0364 | Down | 1.13E-12  | 3.69E-12  |
| Unigene116464 | Potri.007G128000.1 | 3.0306  | 12.4323  | -2.0364 | Down | 1.13E-12  | 3.69E-12  |
| Unigene106357 | Potri.004G008700.1 | 1.6217  | 6.6527   | -2.0364 | Down | 1.13E-12  | 3.69E-12  |
| Unigene74742  | Potri.001G129800.1 | 8.9381  | 36.6667  | -2.0364 | Down | 6.51E-24  | 3.29E-23  |
| Unigene527    | Potri.009G076200.3 | 7.7366  | 31.7397  | -2.0365 | Down | 2.21E-66  | 2.94E-65  |
| Unigene22446  | Potri.007G035200.1 | 13.3994 | 54.9748  | -2.0366 | Down | 1.33E-106 | 3.08E-105 |
| Unigene7954   | Potri.T180700.1    | 3.9843  | 16.3481  | -2.0367 | Down | 5.67E-42  | 4.66E-41  |
| Unigene35855  | Potri.017G036300.2 | 8.7764  | 36.0137  | -2.0368 | Down | 8.21E-31  | 5.10E-30  |
| Unigene8000   | Potri.010G185000.1 | 5.2622  | 21.5933  | -2.0368 | Down | 8.21E-31  | 5.10E-30  |
| Unigene22672  | Potri.013G027300.1 | 1.865   | 7.6543   | -2.0371 | Down | 1.03E-46  | 9.38E-46  |
| Unigene17260  | Potri.010G220500.1 | 2.2948  | 9.4184   | -2.0371 | Down | 1.14E-28  | 6.64E-28  |
| Unigene117879 | Potri.001G237000.2 | 2.0084  | 8.2431   | -2.0371 | Down | 1.66E-10  | 4.89E-10  |
| Unigene27780  | Potri.006G059300.2 | 35.0479 | 143.8651 | -2.0373 | Down | 4.80E-155 | 1.79E-153 |
| Unigene9545   | Potri.015G105200.2 | 12.3697 | 50.7782  | -2.0374 | Down | 2.63E-85  | 4.65E-84  |
| Unigene3620   | Potri.011G115100.3 | 25.6527 | 105.3075 | -2.0374 | Down | 2.58E-76  | 4.01E-75  |
| Unigene105    | Potri.004G091000.1 | 9.4408  | 38.7612  | -2.0376 | Down | 0         | 0         |
| Unigene28889  | Potri.005G059900.1 | 2.1505  | 8.8299   | -2.0377 | Down | 2.63E-40  | 2.07E-39  |
| Unigene37677  | Potri.003G200600.7 | 17.9388 | 73.6532  | -2.0377 | Down | 4.71E-72  | 6.84E-71  |
| Unigene77986  | Potri.014G066500.5 | 10.9986 | 45.1654  | -2.0379 | Down | 2.77E-31  | 1.75E-30  |
| Unigene34114  | Potri.008G091200.1 | 9.7726  | 40.1301  | -2.0379 | Down | 1.20E-83  | 2.08E-82  |
| Unigene15779  | Potri.006G087200.1 | 10.2745 | 42.1978  | -2.0381 | Down | 1.60E-72  | 2.34E-71  |
| Unigene23048  | Potri.001G024600.3 | 9.4313  | 38.7336  | -2.0381 | Down | 8.59E-59  | 1.00E-57  |
| Unigene49604  | Potri.014G109700.2 | 1.6     | 6.5718   | -2.0382 | Down | 2.52E-08  | 6.51E-08  |
| Unigene45628  | Potri.009G168500.1 | 1.2538  | 5.1498   | -2.0382 | Down | 2.52E-08  | 6.51E-08  |
| Unigene36390  | Potri.007G011400.1 | 5.1117  | 20.9961  | -2.0382 | Down | 3.83E-29  | 2.27E-28  |
| Unigene28372  | Potri.004G037000.1 | 1.7605  | 7.231    | -2.0382 | Down | 2.52E-08  | 6.51E-08  |
| Unigene26643  | Potri.003G107500.1 | 2.2436  | 9.2154   | -2.0382 | Down | 2.52E-08  | 6.51E-08  |
| Unigene118655 | Potri.016G051200.1 | 1.2779  | 5.249    | -2.0383 | Down | 2.52E-08  | 6.51E-08  |
| Unigene106993 | Potri.011G131300.1 | 1.1543  | 4.7414   | -2.0383 | Down | 2.52E-08  | 6.51E-08  |
| Unigene48160  | Potri.010G078900.1 | 1.4042  | 5.7678   | -2.0383 | Down | 2.52E-08  | 6.51E-08  |
| Unigene60549  | Potri.008G111100.1 | 6.7055  | 27.5427  | -2.0383 | Down | 3.07E-22  | 1.47E-21  |
| Unigene31577  | Potri.006G194200.2 | 3.5523  | 14.5911  | -2.0383 | Down | 2.60E-15  | 9.60E-15  |
| Unigene54132  | Potri.006G020600.1 | 0.7936  | 3.2597   | -2.0383 | Down | 2.52E-08  | 6.51E-08  |
| Unigene10388  | Potri.004G167600.1 | 1.5263  | 6.2693   | -2.0383 | Down | 2.52E-08  | 6.51E-08  |
| Unigene45226  | Potri.T146100.2    | 5.2722  | 21.6586  | -2.0385 | Down | 1.18E-47  | 1.10E-46  |

|               |                    |         |          |         |      |           |           |
|---------------|--------------------|---------|----------|---------|------|-----------|-----------|
| Unigene32854  | Potri.004G116200.2 | 3.3463  | 13.7476  | -2.0385 | Down | 3.96E-66  | 5.25E-65  |
| Unigene32389  | Potri.003G062700.1 | 3.3224  | 13.6496  | -2.0386 | Down | 6.79E-34  | 4.58E-33  |
| Unigene33304  | Potri.001G049400.3 | 2.6336  | 10.8216  | -2.0388 | Down | 4.31E-20  | 1.93E-19  |
| Unigene43626  | Potri.018G026200.4 | 3.0426  | 12.5048  | -2.0391 | Down | 7.40E-25  | 3.85E-24  |
| Unigene22787  | Potri.018G021100.1 | 3.4489  | 14.1749  | -2.0391 | Down | 4.00E-48  | 3.76E-47  |
| Unigene33782  | Potri.016G140200.3 | 1.7484  | 7.1859   | -2.0391 | Down | 3.76E-13  | 1.26E-12  |
| Unigene10010  | Potri.016G096500.1 | 2.3421  | 9.6258   | -2.0391 | Down | 3.76E-13  | 1.26E-12  |
| Unigene40132  | Potri.006G063500.1 | 3.7719  | 15.5022  | -2.0391 | Down | 1.67E-36  | 1.20E-35  |
| Unigene36414  | Potri.009G029100.3 | 1.4366  | 5.9045   | -2.0392 | Down | 3.76E-13  | 1.26E-12  |
| Unigene23500  | Potri.006G044100.1 | 8.012   | 32.9316  | -2.0392 | Down | 7.30E-53  | 7.56E-52  |
| Unigene1359   | Potri.003G198700.1 | 4.014   | 16.4999  | -2.0393 | Down | 1.29E-29  | 7.77E-29  |
| Unigene1121   | Potri.004G218300.3 | 21.731  | 89.3393  | -2.0395 | Down | 2.26E-174 | 9.82E-173 |
| Unigene812    | Potri.001G027200.1 | 7.0291  | 28.8963  | -2.0395 | Down | 4.32E-209 | 2.36E-207 |
| Unigene27941  | Potri.015G143300.3 | 8.2582  | 33.9572  | -2.0398 | Down | 2.47E-53  | 2.59E-52  |
| Unigene1776   | Potri.004G035900.2 | 10.1037 | 41.5459  | -2.0398 | Down | 2.47E-53  | 2.59E-52  |
| Unigene17405  | Potri.002G168500.1 | 4.345   | 17.8674  | -2.0399 | Down | 8.36E-63  | 1.04E-61  |
| Unigene45721  | Potri.005G109400.1 | 7.5574  | 31.0801  | -2.04   | Down | 9.87E-82  | 1.66E-80  |
| Unigene30153  | Potri.003G099300.3 | 18.4096 | 75.7138  | -2.0401 | Down | 3.36E-51  | 3.36E-50  |
| Unigene117720 | Potri.003G186900.1 | 1.0826  | 4.4532   | -2.0403 | Down | 4.01E-06  | 8.77E-06  |
| Unigene32008  | Potri.017G023300.1 | 8.9356  | 36.7574  | -2.0404 | Down | 2.69E-115 | 6.88E-114 |
| Unigene106975 | Potri.016G069100.1 | 1.5872  | 6.5291   | -2.0404 | Down | 1.45E-20  | 6.58E-20  |
| Unigene56016  | Potri.014G107300.1 | 3.4382  | 14.1434  | -2.0404 | Down | 8.71E-16  | 3.28E-15  |
| Unigene104049 | Potri.009G071800.1 | 0.8674  | 3.5682   | -2.0404 | Down | 4.01E-06  | 8.77E-06  |
| Unigene106299 | Potri.008G220100.3 | 1.0588  | 4.3556   | -2.0404 | Down | 5.53E-11  | 1.67E-10  |
| Unigene27594  | Potri.008G101300.1 | 1.3885  | 5.7116   | -2.0404 | Down | 5.53E-11  | 1.67E-10  |
| Unigene53774  | Potri.002G072300.1 | 4.3804  | 18.019   | -2.0404 | Down | 8.71E-16  | 3.28E-15  |
| Unigene31321  | Potri.004G001200.3 | 10.6715 | 43.9081  | -2.0407 | Down | 6.24E-47  | 5.72E-46  |
| Unigene19676  | Potri.001G205800.8 | 28.4677 | 117.1376 | -2.0408 | Down | 1.38E-144 | 4.69E-143 |
| Unigene17254  | Potri.003G221100.2 | 6.2507  | 25.7229  | -2.041  | Down | 6.05E-28  | 3.46E-27  |
| Unigene81771  | Potri.019G071000.1 | 55.0751 | 226.6697 | -2.0411 | Down | 2.02E-164 | 8.19E-163 |
| Unigene34672  | Potri.004G034700.1 | 12.5026 | 51.455   | -2.0411 | Down | 6.99E-131 | 2.10E-129 |
| Unigene21788  | Potri.002G021400.1 | 2.6719  | 10.9962  | -2.0411 | Down | 3.48E-23  | 1.72E-22  |
| Unigene287    | Potri.009G170100.1 | 3.4756  | 14.3085  | -2.0415 | Down | 7.03E-79  | 1.13E-77  |
| Unigene39848  | Potri.017G026400.1 | 3.589   | 14.776   | -2.0416 | Down | 1.26E-13  | 4.31E-13  |
| Unigene117217 | Potri.009G012400.3 | 2.9755  | 12.2502  | -2.0416 | Down | 1.26E-13  | 4.31E-13  |
| Unigene114760 | Potri.001G256100.1 | 3.784   | 15.579   | -2.0416 | Down | 1.26E-13  | 4.31E-13  |
| Unigene110954 | Potri.004G084800.7 | 25.6843 | 105.7505 | -2.0417 | Down | 2.04E-69  | 2.84E-68  |
| Unigene7118   | Potri.010G220900.1 | 9.0161  | 37.1247  | -2.0418 | Down | 3.61E-33  | 2.39E-32  |
| Unigene49578  | Potri.015G063600.3 | 10.5604 | 43.4919  | -2.0421 | Down | 2.81E-89  | 5.22E-88  |

|              |                    |         |          |         |      |           |           |
|--------------|--------------------|---------|----------|---------|------|-----------|-----------|
| Unigene7271  | Potri.014G106000.1 | 9.2592  | 38.1335  | -2.0421 | Down | 1.50E-62  | 1.86E-61  |
| Unigene50657 | Potri.002G188700.4 | 9.1428  | 37.6573  | -2.0422 | Down | 1.78E-50  | 1.75E-49  |
| Unigene56242 | Potri.T151200.1    | 1.7138  | 7.0596   | -2.0424 | Down | 2.92E-16  | 1.12E-15  |
| Unigene20718 | Potri.018G009400.5 | 5.982   | 24.6419  | -2.0424 | Down | 4.98E-31  | 3.11E-30  |
| Unigene26087 | Potri.009G120800.1 | 5.7023  | 23.4896  | -2.0424 | Down | 2.18E-38  | 1.65E-37  |
| Unigene1172  | Potri.001G385900.1 | 3.2545  | 13.4065  | -2.0424 | Down | 9.76E-46  | 8.71E-45  |
| Unigene82228 | Potri.001G244600.2 | 7.3165  | 30.1389  | -2.0424 | Down | 1.17E-23  | 5.88E-23  |
| Unigene98294 | Potri.018G054100.1 | 1.5133  | 6.234    | -2.0425 | Down | 8.33E-09  | 2.22E-08  |
| Unigene21819 | Potri.009G144800.1 | 11.6589 | 48.0297  | -2.0425 | Down | 2.53E-114 | 6.40E-113 |
| Unigene33461 | Potri.001G129000.1 | 8.3241  | 34.2978  | -2.0427 | Down | 2.75E-58  | 3.18E-57  |
| Unigene86599 | Potri.018G003700.2 | 6.9937  | 28.817   | -2.0428 | Down | 2.83E-26  | 1.54E-25  |
| Unigene35432 | Potri.010G253200.2 | 6.5217  | 26.8723  | -2.0428 | Down | 2.83E-26  | 1.54E-25  |
| Unigene94576 | Potri.009G146800.1 | 2.7784  | 11.4494  | -2.0429 | Down | 6.88E-19  | 2.94E-18  |
| Unigene16598 | Potri.006G165300.3 | 14.8281 | 61.1013  | -2.0429 | Down | 1.33E-43  | 1.13E-42  |
| Unigene32986 | Potri.012G106700.1 | 1.7954  | 7.3987   | -2.043  | Down | 6.88E-19  | 2.94E-18  |
| Unigene54386 | Potri.003G005700.3 | 6.6017  | 27.205   | -2.043  | Down | 3.00E-36  | 2.14E-35  |
| Unigene43609 | Potri.018G074300.1 | 11.2686 | 46.4409  | -2.0431 | Down | 1.30E-100 | 2.81E-99  |
| Unigene52080 | Potri.015G100800.1 | 7.4167  | 30.5656  | -2.0431 | Down | 3.30E-46  | 2.98E-45  |
| Unigene24422 | Potri.015G055500.1 | 6.9734  | 28.7412  | -2.0432 | Down | 7.38E-39  | 5.63E-38  |
| Unigene24716 | Potri.T134200.6    | 5.5889  | 23.0378  | -2.0434 | Down | 1.64E-21  | 7.68E-21  |
| Unigene86398 | Potri.018G139800.3 | 8.5504  | 35.2455  | -2.0434 | Down | 1.68E-31  | 1.06E-30  |
| Unigene397   | Potri.010G103400.1 | 7.7217  | 31.8309  | -2.0434 | Down | 1.11E-103 | 2.49E-102 |
| Unigene34410 | Potri.005G245800.1 | 10.8081 | 44.5518  | -2.0434 | Down | 3.16E-81  | 5.27E-80  |
| Unigene5672  | Potri.001G252100.1 | 1.5104  | 6.2259   | -2.0434 | Down | 1.84E-11  | 5.68E-11  |
| Unigene27168 | Potri.001G177700.1 | 11.6785 | 48.1452  | -2.0435 | Down | 4.51E-44  | 3.88E-43  |
| Unigene45360 | Potri.005G125000.1 | 3.639   | 15.0035  | -2.0437 | Down | 3.95E-24  | 2.01E-23  |
| Unigene25821 | Potri.001G257000.4 | 15.2723 | 62.9674  | -2.0437 | Down | 1.12E-46  | 1.02E-45  |
| Unigene34247 | Potri.001G031700.1 | 16.5331 | 68.1669  | -2.0437 | Down | 1.37E-126 | 3.93E-125 |
| Unigene34109 | Potri.016G051900.2 | 4.7957  | 19.7737  | -2.0438 | Down | 1.01E-36  | 7.34E-36  |
| Unigene22080 | Potri.011G010600.1 | 2.4744  | 10.2026  | -2.0438 | Down | 1.01E-36  | 7.34E-36  |
| Unigene22676 | Potri.019G076900.4 | 2.0842  | 8.5945   | -2.0439 | Down | 4.20E-14  | 1.47E-13  |
| Unigene41922 | Potri.008G171000.1 | 5.2765  | 21.7588  | -2.0439 | Down | 9.55E-27  | 5.27E-26  |
| Unigene35838 | Potri.002G240000.1 | 4.9168  | 20.2753  | -2.0439 | Down | 4.20E-14  | 1.47E-13  |
| Unigene38811 | Potri.005G252500.2 | 12.3474 | 50.9244  | -2.0441 | Down | 9.14E-85  | 1.60E-83  |
| Unigene80094 | Potri.007G128300.3 | 10.6137 | 43.779   | -2.0443 | Down | 5.67E-32  | 3.64E-31  |
| Unigene31628 | Potri.001G222500.2 | 13.8541 | 57.1523  | -2.0445 | Down | 2.34E-52  | 2.40E-51  |
| Unigene44244 | Potri.018G113000.1 | 2.2036  | 9.0909   | -2.0446 | Down | 2.31E-19  | 1.00E-18  |
| Unigene12556 | Potri.018G071500.1 | 11.5563 | 47.6756  | -2.0446 | Down | 5.83E-55  | 6.29E-54  |
| Unigene80658 | Potri.005G145400.1 | 39.5465 | 163.1616 | -2.0447 | Down | 6.00E-116 | 1.55E-114 |

|               |                    |         |          |         |      |           |           |
|---------------|--------------------|---------|----------|---------|------|-----------|-----------|
| Unigene80018  | Potri.011G079000.2 | 7.1554  | 29.5238  | -2.0448 | Down | 5.52E-22  | 2.62E-21  |
| Unigene72079  | Potri.004G039000.1 | 8.5516  | 35.2846  | -2.0448 | Down | 5.52E-22  | 2.62E-21  |
| Unigene5530   | Potri.005G124700.4 | 7.0856  | 29.2387  | -2.0449 | Down | 1.33E-24  | 6.87E-24  |
| Unigene59463  | Potri.008G127900.1 | 5.2592  | 21.7052  | -2.0451 | Down | 7.84E-30  | 4.74E-29  |
| Unigene10185  | Potri.002G238100.1 | 17.5195 | 72.3029  | -2.0451 | Down | 1.98E-55  | 2.15E-54  |
| Unigene32873  | Potri.001G136300.1 | 4.2549  | 17.5639  | -2.0454 | Down | 1.92E-81  | 3.21E-80  |
| Unigene48448  | Potri.018G030500.4 | 10.0193 | 41.3608  | -2.0455 | Down | 1.75E-45  | 1.55E-44  |
| Unigene45725  | Potri.017G057900.1 | 13.8043 | 57.0046  | -2.046  | Down | 1.36E-193 | 6.78E-192 |
| Unigene79058  | Potri.017G042200.4 | 12.1224 | 50.0641  | -2.0461 | Down | 1.59E-35  | 1.12E-34  |
| Unigene17199  | Potri.016G048600.1 | 2.9399  | 12.1413  | -2.0461 | Down | 1.86E-22  | 8.96E-22  |
| Unigene78244  | Potri.015G018100.1 | 12.3278 | 50.9126  | -2.0461 | Down | 1.59E-35  | 1.12E-34  |
| Unigene28045  | Potri.011G139300.1 | 3.6161  | 14.9342  | -2.0461 | Down | 4.48E-25  | 2.35E-24  |
| Unigene7101   | Potri.010G140500.1 | 1.5     | 6.1948   | -2.0461 | Down | 1.40E-14  | 5.02E-14  |
| Unigene62208  | Potri.009G060600.3 | 7.7843  | 32.1482  | -2.0461 | Down | 5.54E-85  | 9.74E-84  |
| Unigene12816  | Potri.008G102300.1 | 5.6658  | 23.399   | -2.0461 | Down | 1.86E-22  | 8.96E-22  |
| Unigene674    | Potri.007G116300.2 | 1.3533  | 5.5889   | -2.0461 | Down | 1.86E-22  | 8.96E-22  |
| Unigene54080  | Potri.007G106400.2 | 4.9488  | 20.4382  | -2.0461 | Down | 4.48E-25  | 2.35E-24  |
| Unigene28651  | Potri.005G218900.2 | 3.3909  | 14.0039  | -2.0461 | Down | 1.09E-27  | 6.16E-27  |
| Unigene30001  | Potri.004G077800.3 | 1.4485  | 5.9823   | -2.0461 | Down | 1.31E-06  | 2.97E-06  |
| Unigene50772  | Potri.003G070400.1 | 2.2606  | 9.336    | -2.0461 | Down | 6.12E-12  | 1.94E-11  |
| Unigene2970   | Potri.001G276600.1 | 4.1475  | 17.1286  | -2.0461 | Down | 8.84E-67  | 1.18E-65  |
| Unigene79699  | Potri.001G157300.1 | 2.7516  | 11.3638  | -2.0461 | Down | 2.75E-09  | 7.54E-09  |
| Unigene53416  | Potri.001G151700.4 | 3.0161  | 12.4563  | -2.0461 | Down | 1.40E-14  | 5.02E-14  |
| Unigene27030  | Potri.001G309500.1 | 34.5021 | 142.514  | -2.0463 | Down | 4.90E-114 | 1.24E-112 |
| Unigene16371  | Potri.013G112700.1 | 24.6887 | 101.9939 | -2.0466 | Down | 4.79E-62  | 5.91E-61  |
| Unigene35591  | Potri.009G032700.2 | 16.1016 | 66.5244  | -2.0467 | Down | 2.56E-96  | 5.22E-95  |
| Unigene39519  | Potri.008G096000.2 | 3.5289  | 14.5822  | -2.0469 | Down | 5.37E-36  | 3.82E-35  |
| Unigene87091  | Potri.005G213200.1 | 18.23   | 75.3311  | -2.0469 | Down | 1.02E-67  | 1.38E-66  |
| Unigene107416 | Potri.009G088900.3 | 12.4953 | 51.638   | -2.047  | Down | 8.93E-31  | 5.54E-30  |
| Unigene53502  | Potri.010G177900.1 | 11.2082 | 46.3219  | -2.0471 | Down | 3.66E-28  | 2.11E-27  |
| Unigene63     | Potri.017G044600.3 | 14.0592 | 58.109   | -2.0472 | Down | 6.37E-288 | 5.36E-286 |
| Unigene24155  | Potri.014G192500.1 | 1.4769  | 6.1044   | -2.0473 | Down | 1.51E-25  | 8.02E-25  |
| Unigene26837  | Potri.001G201800.1 | 18.9596 | 78.3678  | -2.0473 | Down | 3.45E-68  | 4.71E-67  |
| Unigene104168 | Potri.014G150000.1 | 7.4599  | 30.8372  | -2.0474 | Down | 5.50E-63  | 6.89E-62  |
| Unigene28562  | Potri.014G144100.1 | 8.6008  | 35.5521  | -2.0474 | Down | 2.73E-44  | 2.36E-43  |
| Unigene13446  | Potri.007G028600.1 | 5.9255  | 24.4942  | -2.0474 | Down | 2.92E-84  | 5.08E-83  |
| Unigene51136  | Potri.016G058300.1 | 12.4332 | 51.3997  | -2.0476 | Down | 4.47E-39  | 3.43E-38  |
| Unigene19190  | Potri.016G035500.1 | 8.204   | 33.9159  | -2.0476 | Down | 4.47E-39  | 3.43E-38  |
| Unigene35516  | Potri.018G093400.6 | 24.6609 | 101.9575 | -2.0477 | Down | 2.93E-71  | 4.20E-70  |

|               |                    |         |          |         |      |           |           |
|---------------|--------------------|---------|----------|---------|------|-----------|-----------|
| Unigene31765  | Potri.005G234700.2 | 3.9658  | 16.3974  | -2.0478 | Down | 1.10E-17  | 4.49E-17  |
| Unigene100634 | Potri.004G157400.1 | 2.3713  | 9.8046   | -2.0478 | Down | 1.10E-17  | 4.49E-17  |
| Unigene11267  | Potri.002G014200.1 | 2.5844  | 10.686   | -2.0478 | Down | 7.38E-34  | 4.97E-33  |
| Unigene32564  | Potri.001G018800.1 | 5.9358  | 24.5432  | -2.0478 | Down | 4.66E-66  | 6.17E-65  |
| Unigene4990   | Potri.019G081600.3 | 12.6818 | 52.4417  | -2.048  | Down | 3.01E-31  | 1.90E-30  |
| Unigene64892  | Potri.001G148100.1 | 12.6604 | 52.3562  | -2.048  | Down | 2.99E-58  | 3.44E-57  |
| Unigene72921  | Potri.016G137300.3 | 28.7331 | 118.8252 | -2.0481 | Down | 9.93E-72  | 1.43E-70  |
| Unigene106520 | Potri.015G063500.1 | 1.5753  | 6.515    | -2.0481 | Down | 4.69E-15  | 1.71E-14  |
| Unigene55012  | Potri.004G217200.3 | 2.414   | 9.9834   | -2.0481 | Down | 4.69E-15  | 1.71E-14  |
| Unigene35400  | Potri.001G368700.1 | 0.9564  | 3.9554   | -2.0481 | Down | 4.69E-15  | 1.71E-14  |
| Unigene19833  | Potri.003G221200.3 | 25.8639 | 106.9686 | -2.0482 | Down | 6.27E-107 | 1.46E-105 |
| Unigene114815 | Potri.017G129500.1 | 6.7328  | 27.854   | -2.0486 | Down | 2.10E-23  | 1.05E-22  |
| Unigene61389  | Potri.014G108200.1 | 4.0021  | 16.557   | -2.0486 | Down | 2.04E-12  | 6.61E-12  |
| Unigene2799   | Potri.016G114600.1 | 4.9985  | 20.6809  | -2.0487 | Down | 1.63E-53  | 1.71E-52  |
| Unigene36196  | Potri.004G038700.1 | 9.9755  | 41.2755  | -2.0488 | Down | 1.02E-31  | 6.48E-31  |
| Unigene8431   | Potri.003G017500.1 | 3.4659  | 14.3434  | -2.0491 | Down | 4.17E-29  | 2.47E-28  |
| Unigene11728  | Potri.005G011300.1 | 1.9419  | 8.037    | -2.0492 | Down | 2.07E-37  | 1.53E-36  |
| Unigene117486 | Potri.011G140800.1 | 1.9416  | 8.037    | -2.0494 | Down | 9.11E-10  | 2.56E-09  |
| Unigene9880   | Potri.005G140100.1 | 1.9963  | 8.2634   | -2.0494 | Down | 9.11E-10  | 2.56E-09  |
| Unigene99003  | Potri.002G049500.1 | 1.3761  | 5.6962   | -2.0494 | Down | 9.11E-10  | 2.56E-09  |
| Unigene68852  | Potri.005G087500.1 | 7.7939  | 32.2681  | -2.0497 | Down | 3.44E-32  | 2.22E-31  |
| Unigene28835  | Potri.009G028500.1 | 4.1264  | 17.0853  | -2.0498 | Down | 3.59E-46  | 3.23E-45  |
| Unigene26910  | Potri.002G246900.2 | 12.9848 | 53.7631  | -2.0498 | Down | 3.59E-46  | 3.23E-45  |
| Unigene53933  | Potri.007G082500.1 | 38.4102 | 159.0457 | -2.0499 | Down | 2.03E-182 | 9.40E-181 |
| Unigene31995  | Potri.004G125900.1 | 1.944   | 8.0501   | -2.05   | Down | 1.45E-43  | 1.23E-42  |
| Unigene43937  | Potri.003G005000.1 | 12.1176 | 50.1805  | -2.05   | Down | 1.58E-57  | 1.79E-56  |
| Unigene32493  | Potri.018G122900.1 | 5.6543  | 23.42    | -2.0503 | Down | 1.74E-105 | 3.96E-104 |
| Unigene31548  | Potri.018G030500.3 | 32.1411 | 133.1242 | -2.0503 | Down | 3.64E-178 | 1.63E-176 |
| Unigene10991  | Potri.001G353700.3 | 7.9049  | 32.7404  | -2.0503 | Down | 2.44E-133 | 7.50E-132 |
| Unigene32799  | Potri.009G046700.1 | 9.1433  | 37.8737  | -2.0504 | Down | 1.76E-122 | 4.86E-121 |
| Unigene23767  | Potri.001G418900.1 | 12.7908 | 52.9876  | -2.0505 | Down | 2.40E-69  | 3.34E-68  |
| Unigene27961  | Potri.007G126500.1 | 7.5498  | 31.2767  | -2.0506 | Down | 2.37E-38  | 1.79E-37  |
| Unigene6297   | Potri.019G055200.1 | 14.7271 | 61.0192  | -2.0508 | Down | 4.30E-95  | 8.62E-94  |
| Unigene37641  | Potri.T131600.1    | 2.3539  | 9.7537   | -2.0509 | Down | 4.27E-07  | 1.01E-06  |
| Unigene73381  | Potri.019G092100.4 | 9.1923  | 38.0902  | -2.0509 | Down | 2.39E-24  | 1.22E-23  |
| Unigene101207 | Potri.018G113100.1 | 1.7893  | 7.4142   | -2.0509 | Down | 4.27E-07  | 1.01E-06  |
| Unigene62911  | Potri.018G086000.2 | 3.2434  | 13.4399  | -2.0509 | Down | 6.80E-13  | 2.25E-12  |
| Unigene31632  | Potri.018G058000.1 | 17.2407 | 71.4404  | -2.0509 | Down | 4.11E-47  | 3.78E-46  |
| Unigene51180  | Potri.012G046800.1 | 1.8367  | 7.6108   | -2.0509 | Down | 4.27E-07  | 1.01E-06  |

|               |                    |         |          |         |      |           |           |
|---------------|--------------------|---------|----------|---------|------|-----------|-----------|
| Unigene32884  | Potri.012G040600.1 | 5.287   | 21.9078  | -2.0509 | Down | 3.71E-81  | 6.18E-80  |
| Unigene116150 | Potri.012G006500.1 | 3.1385  | 13.0049  | -2.0509 | Down | 6.80E-13  | 2.25E-12  |
| Unigene14859  | Potri.010G078200.1 | 1.5492  | 6.4194   | -2.0509 | Down | 4.27E-07  | 1.01E-06  |
| Unigene18518  | Potri.007G043300.2 | 6.5582  | 27.1751  | -2.0509 | Down | 1.71E-92  | 3.31E-91  |
| Unigene35651  | Potri.001G358300.1 | 4.0074  | 16.6055  | -2.0509 | Down | 6.80E-13  | 2.25E-12  |
| Unigene46291  | Potri.014G093200.1 | 1.1224  | 4.6511   | -2.051  | Down | 4.27E-07  | 1.01E-06  |
| Unigene99474  | Potri.007G125400.1 | 1.0144  | 4.2035   | -2.051  | Down | 4.27E-07  | 1.01E-06  |
| Unigene36437  | Potri.004G232800.1 | 1.4474  | 5.9978   | -2.051  | Down | 4.27E-07  | 1.01E-06  |
| Unigene97656  | Potri.004G150700.1 | 2.1174  | 8.7741   | -2.051  | Down | 4.27E-07  | 1.01E-06  |
| Unigene107037 | Potri.001G310200.1 | 0.9166  | 3.7982   | -2.051  | Down | 4.27E-07  | 1.01E-06  |
| Unigene12372  | Potri.019G080300.2 | 25.2976 | 104.8377 | -2.0511 | Down | 2.87E-155 | 1.07E-153 |
| Unigene29535  | Potri.006G040400.1 | 2.1263  | 8.8136   | -2.0514 | Down | 1.95E-27  | 1.10E-26  |
| Unigene14146  | Potri.003G098200.2 | 5.8065  | 24.0687  | -2.0514 | Down | 1.95E-27  | 1.10E-26  |
| Unigene1261   | Potri.005G219500.1 | 14.1854 | 58.8038  | -2.0515 | Down | 9.15E-88  | 1.67E-86  |
| Unigene10118  | Potri.007G032000.1 | 8.3357  | 34.5581  | -2.0516 | Down | 9.35E-71  | 1.33E-69  |
| Unigene20993  | Potri.016G137300.3 | 4.0623  | 16.8433  | -2.0518 | Down | 5.26E-16  | 2.00E-15  |
| Unigene46235  | Potri.010G211100.3 | 3.9451  | 16.3574  | -2.0518 | Down | 5.26E-16  | 2.00E-15  |
| Unigene72634  | Potri.010G196100.1 | 9.5042  | 39.4124  | -2.052  | Down | 8.04E-25  | 4.18E-24  |
| Unigene3636   | Potri.001G216600.1 | 36.6088 | 151.8108 | -2.052  | Down | 7.40E-187 | 3.55E-185 |
| Unigene18942  | Potri.005G060700.1 | 2.9278  | 12.142   | -2.0521 | Down | 1.32E-33  | 8.85E-33  |
| Unigene98987  | Potri.007G141000.2 | 1.7512  | 7.2635   | -2.0523 | Down | 3.02E-10  | 8.74E-10  |
| Unigene763    | Potri.004G235200.2 | 25.0004 | 103.6944 | -2.0523 | Down | 0         | 0         |
| Unigene70303  | Potri.002G249100.1 | 0.9739  | 4.0395   | -2.0523 | Down | 3.02E-10  | 8.74E-10  |
| Unigene67265  | Potri.018G150600.2 | 2.6931  | 11.1706  | -2.0524 | Down | 3.02E-10  | 8.74E-10  |
| Unigene31533  | Potri.017G155200.1 | 17.4842 | 72.5217  | -2.0524 | Down | 3.34E-54  | 3.55E-53  |
| Unigene35766  | Potri.009G096400.2 | 11.1342 | 46.183   | -2.0524 | Down | 1.10E-36  | 7.96E-36  |
| Unigene21468  | Potri.014G140400.1 | 8.1077  | 33.634   | -2.0526 | Down | 5.24E-180 | 2.38E-178 |
| Unigene3997   | Potri.003G126900.1 | 15.1322 | 62.7804  | -2.0527 | Down | 1.34E-51  | 1.35E-50  |
| Unigene46968  | Potri.015G007400.1 | 9.7123  | 40.2965  | -2.0528 | Down | 7.65E-43  | 6.40E-42  |
| Unigene42674  | Potri.002G059000.1 | 2.3006  | 9.5453   | -2.0528 | Down | 3.34E-22  | 1.59E-21  |
| Unigene23687  | Potri.018G076700.3 | 1.9038  | 7.9003   | -2.053  | Down | 2.27E-13  | 7.70E-13  |
| Unigene32380  | Potri.015G096200.1 | 6.7148  | 27.8636  | -2.053  | Down | 1.45E-69  | 2.03E-68  |
| Unigene47981  | Potri.001G140800.1 | 2.4684  | 10.2433  | -2.053  | Down | 2.27E-13  | 7.70E-13  |
| Unigene32932  | Potri.015G049900.3 | 3.0116  | 12.4978  | -2.0531 | Down | 8.08E-61  | 9.74E-60  |
| Unigene19997  | Potri.015G007400.1 | 12.2071 | 50.6577  | -2.0531 | Down | 1.24E-72  | 1.81E-71  |
| Unigene2946   | Potri.017G144800.3 | 11.3209 | 46.9897  | -2.0534 | Down | 1.88E-126 | 5.39E-125 |
| Unigene107963 | Potri.013G069700.1 | 12.4332 | 51.6104  | -2.0535 | Down | 1.82E-31  | 1.15E-30  |
| Unigene37960  | Potri.004G225700.5 | 38.0141 | 157.8155 | -2.0536 | Down | 3.44E-118 | 9.09E-117 |
| Unigene86541  | Potri.008G121700.2 | 19.3268 | 80.2378  | -2.0537 | Down | 1.67E-70  | 2.37E-69  |

|               |                    |         |          |         |      |           |           |
|---------------|--------------------|---------|----------|---------|------|-----------|-----------|
| Unigene4546   | Potri.016G084900.1 | 23.823  | 98.9174  | -2.0539 | Down | 1.00E-121 | 2.74E-120 |
| Unigene22036  | Potri.008G108100.1 | 3.0577  | 12.697   | -2.054  | Down | 6.67E-68  | 9.07E-67  |
| Unigene5106   | Potri.003G134200.2 | 8.7297  | 36.2522  | -2.0541 | Down | 9.12E-26  | 4.89E-25  |
| Unigene64130  | Potri.002G036600.1 | 8.8426  | 36.721   | -2.0541 | Down | 9.12E-26  | 4.89E-25  |
| Unigene42399  | Potri.017G112200.2 | 7.1506  | 29.6978  | -2.0542 | Down | 7.64E-174 | 3.31E-172 |
| Unigene513    | Potri.013G144600.1 | 3.1854  | 13.229   | -2.0542 | Down | 4.39E-56  | 4.85E-55  |
| Unigene9052   | Potri.017G076000.3 | 3.2102  | 13.3402  | -2.055  | Down | 4.69E-20  | 2.09E-19  |
| Unigene116570 | Potri.016G134900.3 | 0.8059  | 3.3488   | -2.055  | Down | 2.22E-04  | 4.10E-04  |
| Unigene25624  | Potri.013G157000.1 | 1.1206  | 4.6567   | -2.055  | Down | 2.22E-04  | 4.10E-04  |
| Unigene3430   | Potri.013G041000.3 | 0.9426  | 3.917    | -2.055  | Down | 2.22E-04  | 4.10E-04  |
| Unigene69116  | Potri.011G096900.1 | 2.1638  | 8.9917   | -2.055  | Down | 1.00E-10  | 2.98E-10  |
| Unigene58917  | Potri.011G091900.1 | 1.0879  | 4.5208   | -2.055  | Down | 2.22E-04  | 4.10E-04  |
| Unigene14375  | Potri.010G158000.2 | 1.0614  | 4.4106   | -2.055  | Down | 2.22E-04  | 4.10E-04  |
| Unigene106045 | Potri.007G071000.1 | 0.845   | 3.5113   | -2.055  | Down | 2.22E-04  | 4.10E-04  |
| Unigene101308 | Potri.006G077600.2 | 2.0162  | 8.3784   | -2.055  | Down | 1.40E-07  | 3.44E-07  |
| Unigene46964  | Potri.005G104700.3 | 0.9259  | 3.8475   | -2.055  | Down | 2.22E-04  | 4.10E-04  |
| Unigene51519  | Potri.005G093700.1 | 2.0722  | 8.6111   | -2.055  | Down | 1.40E-07  | 3.44E-07  |
| Unigene110819 | Potri.003G146000.4 | 1.1553  | 4.8009   | -2.055  | Down | 2.22E-04  | 4.10E-04  |
| Unigene30120  | Potri.001G215700.2 | 11.0634 | 45.9746  | -2.055  | Down | 2.08E-32  | 1.35E-31  |
| Unigene36712  | Potri.019G002500.1 | 0.8791  | 3.6532   | -2.0551 | Down | 2.22E-04  | 4.10E-04  |
| Unigene33788  | Potri.015G139400.1 | 0.9688  | 4.026    | -2.0551 | Down | 1.40E-07  | 3.44E-07  |
| Unigene28261  | Potri.015G063700.1 | 1.7701  | 7.3559   | -2.0551 | Down | 7.58E-14  | 2.63E-13  |
| Unigene63019  | Potri.013G073200.5 | 1.3888  | 5.7713   | -2.0551 | Down | 1.40E-07  | 3.44E-07  |
| Unigene114685 | Potri.010G195200.1 | 0.9529  | 3.9599   | -2.0551 | Down | 2.22E-04  | 4.10E-04  |
| Unigene27526  | Potri.008G064700.1 | 6.4949  | 26.9901  | -2.0551 | Down | 5.91E-17  | 2.34E-16  |
| Unigene9481   | Potri.007G107800.1 | 1.0239  | 4.2549   | -2.0551 | Down | 2.22E-04  | 4.10E-04  |
| Unigene103874 | Potri.004G195800.1 | 1.0239  | 4.2549   | -2.0551 | Down | 2.22E-04  | 4.10E-04  |
| Unigene26636  | Potri.002G024100.1 | 1.097   | 4.5588   | -2.0551 | Down | 2.22E-04  | 4.10E-04  |
| Unigene5624   | Potri.001G280100.1 | 1.1922  | 4.9543   | -2.0551 | Down | 2.22E-04  | 4.10E-04  |
| Unigene105113 | Potri.001G021500.2 | 0.9742  | 4.0485   | -2.0551 | Down | 2.22E-04  | 4.10E-04  |
| Unigene162    | Potri.005G228100.1 | 6.0543  | 25.1646  | -2.0554 | Down | 8.24E-141 | 2.71E-139 |
| Unigene1591   | Potri.017G070800.2 | 7.5672  | 31.4549  | -2.0555 | Down | 1.71E-57  | 1.94E-56  |
| Unigene82535  | Potri.005G002800.2 | 27.1917 | 113.0401 | -2.0556 | Down | 1.34E-85  | 2.37E-84  |
| Unigene71686  | Potri.002G055600.1 | 18.1013 | 75.2488  | -2.0556 | Down | 3.39E-45  | 2.99E-44  |
| Unigene3411   | Potri.016G134600.1 | 25.9765 | 107.9977 | -2.0557 | Down | 2.99E-70  | 4.21E-69  |
| Unigene22303  | Potri.007G051900.1 | 18.6259 | 77.4376  | -2.0557 | Down | 7.16E-173 | 3.07E-171 |
| Unigene28922  | Potri.001G184700.1 | 4.1228  | 17.1401  | -2.0557 | Down | 4.85E-39  | 3.72E-38  |
| Unigene22726  | Potri.013G161700.3 | 15.8367 | 65.8529  | -2.056  | Down | 7.34E-202 | 3.86E-200 |
| Unigene43081  | Potri.010G091200.1 | 9.392   | 39.0551  | -2.056  | Down | 9.59E-171 | 4.07E-169 |

|               |                    |         |          |         |      |           |           |
|---------------|--------------------|---------|----------|---------|------|-----------|-----------|
| Unigene41929  | Potri.003G068400.1 | 6.7281  | 27.977   | -2.056  | Down | 1.04E-26  | 5.72E-26  |
| Unigene26953  | Potri.003G063000.4 | 14.3563 | 59.6996  | -2.056  | Down | 9.64E-49  | 9.17E-48  |
| Unigene77217  | Potri.003G199000.2 | 32.4344 | 134.8825 | -2.0561 | Down | 1.31E-89  | 2.45E-88  |
| Unigene27927  | Potri.008G059400.3 | 2.7539  | 11.4547  | -2.0564 | Down | 1.97E-36  | 1.42E-35  |
| Unigene89067  | Potri.011G081200.4 | 27.8403 | 115.8075 | -2.0565 | Down | 1.47E-115 | 3.78E-114 |
| Unigene36328  | Potri.007G086900.3 | 4.3597  | 18.1355  | -2.0565 | Down | 1.98E-17  | 7.99E-17  |
| Unigene66564  | Potri.006G184800.2 | 8.2127  | 34.1636  | -2.0565 | Down | 2.37E-33  | 1.58E-32  |
| Unigene22952  | Potri.005G246500.1 | 1.8344  | 7.6308   | -2.0565 | Down | 1.98E-17  | 8.00E-17  |
| Unigene49676  | Potri.014G106300.5 | 9.8126  | 40.8221  | -2.0566 | Down | 9.89E-75  | 1.50E-73  |
| Unigene7816   | Potri.009G124000.1 | 4.8749  | 20.2826  | -2.0568 | Down | 1.37E-68  | 1.88E-67  |
| Unigene44589  | Potri.013G054300.2 | 2.0643  | 8.5892   | -2.0569 | Down | 2.53E-14  | 8.95E-14  |
| Unigene22955  | Potri.008G157000.1 | 11.5962 | 48.2518  | -2.0569 | Down | 1.98E-113 | 4.96E-112 |
| Unigene51319  | Potri.006G244100.1 | 12.6884 | 52.7946  | -2.0569 | Down | 9.30E-53  | 9.61E-52  |
| Unigene41425  | Potri.010G051600.1 | 2.6793  | 11.15    | -2.0571 | Down | 4.28E-24  | 2.18E-23  |
| Unigene2592   | Potri.005G152200.1 | 12.9659 | 53.9593  | -2.0571 | Down | 9.30E-191 | 4.57E-189 |
| Unigene44943  | Potri.005G052900.1 | 4.0884  | 17.0154  | -2.0572 | Down | 8.00E-34  | 5.38E-33  |
| Unigene24537  | Potri.010G132200.3 | 5.0405  | 20.9786  | -2.0573 | Down | 1.57E-43  | 1.33E-42  |
| Unigene21229  | Potri.009G131200.1 | 10.8042 | 44.9744  | -2.0575 | Down | 0         | 0         |
| Unigene36377  | Potri.007G025800.1 | 6.4613  | 26.8956  | -2.0575 | Down | 5.30E-21  | 2.44E-20  |
| Unigene45155  | Potri.006G037100.1 | 5.7924  | 24.1111  | -2.0575 | Down | 9.68E-31  | 6.00E-30  |
| Unigene2044   | Potri.014G089200.1 | 12.5432 | 52.2171  | -2.0576 | Down | 4.24E-102 | 9.30E-101 |
| Unigene75870  | Potri.013G130800.3 | 27.0965 | 112.8069 | -2.0577 | Down | 4.53E-73  | 6.68E-72  |
| Unigene82884  | Potri.009G074100.1 | 16.6089 | 69.1489  | -2.0577 | Down | 1.07E-53  | 1.12E-52  |
| Unigene19011  | Potri.016G059300.2 | 7.1047  | 29.5808  | -2.0578 | Down | 5.30E-44  | 4.54E-43  |
| Unigene31774  | Potri.004G157700.1 | 10.2291 | 42.5902  | -2.0578 | Down | 4.79E-161 | 1.88E-159 |
| Unigene15560  | Potri.001G416500.1 | 2.6188  | 10.9041  | -2.0579 | Down | 6.64E-18  | 2.73E-17  |
| Unigene37067  | Potri.017G033200.6 | 8.1495  | 33.9379  | -2.0581 | Down | 1.44E-24  | 7.45E-24  |
| Unigene34866  | Potri.014G125000.1 | 6.1553  | 25.6354  | -2.0582 | Down | 3.27E-31  | 2.05E-30  |
| Unigene111678 | Potri.018G004400.3 | 2.3808  | 9.9181   | -2.0586 | Down | 4.60E-08  | 1.17E-07  |
| Unigene43784  | Potri.017G088200.1 | 2.0345  | 8.4754   | -2.0586 | Down | 3.97E-28  | 2.28E-27  |
| Unigene46896  | Potri.010G197900.1 | 1.2601  | 5.2494   | -2.0586 | Down | 4.60E-08  | 1.17E-07  |
| Unigene33797  | Potri.007G026300.1 | 6.1596  | 25.6595  | -2.0586 | Down | 2.14E-41  | 1.74E-40  |
| Unigene40592  | Potri.004G114600.3 | 1.3849  | 5.7692   | -2.0586 | Down | 4.60E-08  | 1.17E-07  |
| Unigene19883  | Potri.006G279900.1 | 20.703  | 86.2692  | -2.059  | Down | 4.14E-55  | 4.49E-54  |
| Unigene34049  | Potri.018G122300.2 | 10.6339 | 44.3142  | -2.0591 | Down | 1.23E-88  | 2.27E-87  |
| Unigene58783  | Potri.006G187900.2 | 2.4354  | 10.1499  | -2.0592 | Down | 2.23E-18  | 9.33E-18  |
| Unigene33901  | Potri.013G003400.3 | 8.5902  | 35.8014  | -2.0593 | Down | 4.91E-52  | 5.00E-51  |
| Unigene65426  | Potri.006G196200.2 | 6.2661  | 26.1167  | -2.0593 | Down | 1.35E-122 | 3.73E-121 |
| Unigene43417  | Potri.004G058200.1 | 3.8224  | 15.9341  | -2.0596 | Down | 2.81E-69  | 3.90E-68  |



|               |                    |         |          |         |      |           |           |
|---------------|--------------------|---------|----------|---------|------|-----------|-----------|
| Unigene85706  | Potri.014G144900.1 | 2.938   | 12.2482  | -2.0597 | Down | 1.11E-11  | 3.46E-11  |
| Unigene116025 | Potri.007G008500.5 | 2.8128  | 11.7262  | -2.0597 | Down | 1.11E-11  | 3.46E-11  |
| Unigene46119  | Potri.001G449100.2 | 2.6356  | 10.9877  | -2.0597 | Down | 5.99E-22  | 2.84E-21  |
| Unigene32879  | Potri.004G040300.1 | 3.7714  | 15.7246  | -2.0599 | Down | 6.94E-46  | 6.22E-45  |
| Unigene43085  | Potri.004G071000.1 | 11.3202 | 47.2045  | -2.06   | Down | 3.90E-63  | 4.90E-62  |
| Unigene89889  | Potri.019G127000.2 | 12.6026 | 52.5583  | -2.0602 | Down | 1.61E-56  | 1.79E-55  |
| Unigene6722   | Potri.017G101600.1 | 2.3989  | 10.0046  | -2.0602 | Down | 2.83E-15  | 1.04E-14  |
| Unigene43482  | Potri.015G090100.1 | 6.3569  | 26.5104  | -2.0602 | Down | 4.43E-135 | 1.38E-133 |
| Unigene3181   | Potri.009G116700.1 | 2.5164  | 10.4945  | -2.0602 | Down | 4.52E-29  | 2.67E-28  |
| Unigene38837  | Potri.007G087200.4 | 2.74    | 11.4271  | -2.0602 | Down | 2.83E-15  | 1.04E-14  |
| Unigene44818  | Potri.005G129800.1 | 2.4654  | 10.2819  | -2.0602 | Down | 4.52E-29  | 2.67E-28  |
| Unigene44961  | Potri.001G255500.1 | 1.1347  | 4.7323   | -2.0602 | Down | 2.83E-15  | 1.04E-14  |
| Unigene34697  | Potri.010G102000.1 | 11.7897 | 49.173   | -2.0603 | Down | 2.68E-77  | 4.23E-76  |
| Unigene13597  | Potri.002G045900.2 | 2.8319  | 11.8115  | -2.0603 | Down | 1.26E-32  | 8.21E-32  |
| Unigene39328  | Potri.006G172100.1 | 5.0698  | 21.146   | -2.0604 | Down | 1.26E-32  | 8.21E-32  |
| Unigene23492  | Potri.013G146900.1 | 13.7665 | 57.4228  | -2.0605 | Down | 4.30E-184 | 2.03E-182 |
| Unigene11739  | Potri.006G031800.1 | 6.0129  | 25.0811  | -2.0605 | Down | 2.24E-84  | 3.90E-83  |
| Unigene101589 | Potri.001G296100.2 | 3.3595  | 14.0138  | -2.0605 | Down | 7.48E-19  | 3.19E-18  |
| Unigene47253  | Potri.007G065400.2 | 7.7915  | 32.5054  | -2.0607 | Down | 2.02E-22  | 9.71E-22  |
| Unigene83126  | Potri.014G145200.2 | 24.1679 | 100.8393 | -2.0609 | Down | 3.08E-78  | 4.93E-77  |
| Unigene80188  | Potri.012G089300.1 | 52.462  | 218.895  | -2.0609 | Down | 1.25E-154 | 4.64E-153 |
| Unigene49807  | Potri.005G116500.1 | 3.7374  | 15.5963  | -2.0611 | Down | 4.36E-68  | 5.95E-67  |
| Unigene7566   | Potri.018G068100.1 | 2.5184  | 10.5104  | -2.0612 | Down | 9.47E-44  | 8.09E-43  |
| Unigene26123  | Potri.014G112700.2 | 16.877  | 70.4387  | -2.0613 | Down | 2.19E-54  | 2.33E-53  |
| Unigene32198  | Potri.006G083300.4 | 4.3797  | 18.2802  | -2.0614 | Down | 1.48E-68  | 2.03E-67  |
| Unigene87501  | Potri.012G039200.1 | 56.2435 | 234.7729 | -2.0615 | Down | 4.78E-213 | 2.66E-211 |
| Unigene117150 | Potri.018G037500.2 | 0.8575  | 3.5797   | -2.0616 | Down | 7.10E-05  | 1.39E-04  |
| Unigene117739 | Potri.007G018800.1 | 0.7853  | 3.2783   | -2.0616 | Down | 7.10E-05  | 1.39E-04  |
| Unigene31130  | Potri.016G035500.1 | 3.8586  | 16.1087  | -2.0617 | Down | 6.78E-23  | 3.32E-22  |
| Unigene20743  | Potri.014G175200.5 | 0.9015  | 3.7636   | -2.0617 | Down | 7.10E-05  | 1.39E-04  |
| Unigene35734  | Potri.014G084900.3 | 1.0219  | 4.2662   | -2.0617 | Down | 7.10E-05  | 1.39E-04  |
| Unigene13060  | Potri.014G064800.1 | 4.0488  | 16.9029  | -2.0617 | Down | 4.02E-37  | 2.94E-36  |
| Unigene15204  | Potri.013G041200.1 | 3.7653  | 15.7191  | -2.0617 | Down | 9.48E-16  | 3.56E-15  |
| Unigene35255  | Potri.012G012700.1 | 2.0965  | 8.7523   | -2.0617 | Down | 3.69E-12  | 1.18E-11  |
| Unigene118436 | Potri.011G057700.1 | 4.0598  | 16.9489  | -2.0617 | Down | 6.78E-23  | 3.32E-22  |
| Unigene48770  | Potri.011G002500.2 | 3.6038  | 15.0452  | -2.0617 | Down | 2.51E-19  | 1.09E-18  |
| Unigene38274  | Potri.010G232600.1 | 9.2461  | 38.6004  | -2.0617 | Down | 1.20E-79  | 1.96E-78  |
| Unigene732    | Potri.010G055500.1 | 2.7435  | 11.4535  | -2.0617 | Down | 6.07E-62  | 7.47E-61  |
| Unigene37218  | Potri.009G155200.7 | 11.6366 | 48.5804  | -2.0617 | Down | 2.59E-51  | 2.60E-50  |

|               |                    |         |          |         |      |           |           |
|---------------|--------------------|---------|----------|---------|------|-----------|-----------|
| Unigene118902 | Potri.008G127400.1 | 1.1521  | 4.8098   | -2.0617 | Down | 1.52E-08  | 3.97E-08  |
| Unigene117215 | Potri.008G070700.2 | 1.7051  | 7.1185   | -2.0617 | Down | 1.52E-08  | 3.97E-08  |
| Unigene110414 | Potri.007G135700.1 | 1.3381  | 5.5863   | -2.0617 | Down | 7.10E-05  | 1.39E-04  |
| Unigene26397  | Potri.005G045500.1 | 1.1841  | 4.9434   | -2.0617 | Down | 7.10E-05  | 1.39E-04  |
| Unigene25278  | Potri.004G041800.2 | 1.0254  | 4.2809   | -2.0617 | Down | 7.10E-05  | 1.39E-04  |
| Unigene7206   | Potri.004G041500.1 | 1.2229  | 5.1055   | -2.0617 | Down | 1.52E-08  | 3.97E-08  |
| Unigene31639  | Potri.004G027300.1 | 2.2022  | 9.1937   | -2.0617 | Down | 1.52E-08  | 3.97E-08  |
| Unigene42510  | Potri.003G216900.1 | 4.528   | 18.9035  | -2.0617 | Down | 5.98E-108 | 1.41E-106 |
| Unigene13270  | Potri.002G230800.1 | 6.7895  | 28.3445  | -2.0617 | Down | 1.44E-72  | 2.11E-71  |
| Unigene26486  | Potri.002G151200.1 | 1.2644  | 5.2786   | -2.0617 | Down | 7.10E-05  | 1.39E-04  |
| Unigene48186  | Potri.002G138200.1 | 1.0851  | 4.53     | -2.0617 | Down | 7.10E-05  | 1.39E-04  |
| Unigene1297   | Potri.001G296500.1 | 3.907   | 16.3109  | -2.0617 | Down | 5.14E-30  | 3.12E-29  |
| Unigene40652  | Potri.001G134000.2 | 1.4846  | 6.1977   | -2.0617 | Down | 1.52E-08  | 3.97E-08  |
| Unigene117350 | Potri.015G135300.3 | 0.8358  | 3.4895   | -2.0618 | Down | 7.10E-05  | 1.39E-04  |
| Unigene5077   | Potri.014G025000.1 | 0.9398  | 3.9236   | -2.0618 | Down | 1.52E-08  | 3.97E-08  |
| Unigene26145  | Potri.010G090200.2 | 1.097   | 4.5799   | -2.0618 | Down | 7.10E-05  | 1.39E-04  |
| Unigene43048  | Potri.011G150500.1 | 16.9498 | 70.782   | -2.0621 | Down | 8.76E-152 | 3.19E-150 |
| Unigene18765  | Potri.001G442900.1 | 2.3996  | 10.0236  | -2.0625 | Down | 6.26E-27  | 3.47E-26  |
| Unigene59617  | Potri.013G094800.1 | 3.2121  | 13.4186  | -2.0626 | Down | 2.28E-23  | 1.13E-22  |
| Unigene22841  | Potri.006G199600.2 | 2.7755  | 11.5961  | -2.0628 | Down | 8.43E-20  | 3.73E-19  |
| Unigene41784  | Potri.005G100400.2 | 2.1539  | 8.9992   | -2.0628 | Down | 8.43E-20  | 3.73E-19  |
| Unigene29551  | Potri.002G020200.1 | 5.2575  | 21.9679  | -2.0629 | Down | 1.63E-34  | 1.12E-33  |
| Unigene19838  | Potri.010G145000.1 | 8.8873  | 37.1387  | -2.0631 | Down | 5.85E-31  | 3.65E-30  |
| Unigene35610  | Potri.009G046700.1 | 11.5036 | 48.072   | -2.0631 | Down | 5.85E-31  | 3.65E-30  |
| Unigene36374  | Potri.007G134400.1 | 5.0377  | 21.052   | -2.0631 | Down | 1.24E-45  | 1.10E-44  |
| Unigene107574 | Potri.004G234600.1 | 6.1238  | 25.5906  | -2.0631 | Down | 3.17E-16  | 1.22E-15  |
| Unigene23319  | Potri.009G013600.1 | 23.9783 | 100.2097 | -2.0632 | Down | 2.15E-137 | 6.90E-136 |
| Unigene11639  | Potri.005G064100.1 | 4.8768  | 20.3813  | -2.0632 | Down | 4.38E-42  | 3.61E-41  |
| Unigene10653  | Potri.014G146200.1 | 3.6949  | 15.4426  | -2.0633 | Down | 5.26E-156 | 1.98E-154 |
| Unigene25492  | Potri.010G077100.1 | 14.0084 | 58.5504  | -2.0634 | Down | 1.55E-38  | 1.17E-37  |
| Unigene14943  | Potri.006G075200.1 | 7.2851  | 30.4529  | -2.0636 | Down | 5.52E-35  | 3.82E-34  |
| Unigene29880  | Potri.004G163900.1 | 1.2987  | 5.4289   | -2.0636 | Down | 1.23E-12  | 4.02E-12  |
| Unigene91583  | Potri.003G222200.2 | 28.3233 | 118.3961 | -2.0636 | Down | 7.17E-146 | 2.48E-144 |
| Unigene5711   | Potri.002G143300.1 | 8.3631  | 34.9593  | -2.0636 | Down | 7.68E-24  | 3.88E-23  |
| Unigene6568   | Potri.005G116400.2 | 12.1002 | 50.5903  | -2.0638 | Down | 4.04E-50  | 3.96E-49  |
| Unigene9006   | Potri.004G142000.1 | 8.5413  | 35.7108  | -2.0638 | Down | 4.04E-50  | 3.96E-49  |
| Unigene88396  | Potri.013G160600.1 | 72.9139 | 304.8992 | -2.0641 | Down | 1.64E-289 | 1.39E-287 |
| Unigene24084  | Potri.008G149900.2 | 3.9644  | 16.5793  | -2.0642 | Down | 5.01E-43  | 4.21E-42  |
| Unigene6597   | Potri.012G103700.2 | 1.1243  | 4.7025   | -2.0644 | Down | 5.01E-09  | 1.35E-08  |

|               |                    |         |          |         |      |           |           |
|---------------|--------------------|---------|----------|---------|------|-----------|-----------|
| Unigene112235 | Potri.006G184600.1 | 2.6311  | 11.0051  | -2.0644 | Down | 5.01E-09  | 1.35E-08  |
| Unigene20235  | Potri.002G159400.1 | 1.8816  | 7.8701   | -2.0644 | Down | 5.01E-09  | 1.35E-08  |
| Unigene14344  | Potri.001G218700.3 | 1.5892  | 6.6472   | -2.0644 | Down | 5.01E-09  | 1.35E-08  |
| Unigene94048  | Potri.006G190000.3 | 19.6773 | 82.3077  | -2.0645 | Down | 9.09E-172 | 3.88E-170 |
| Unigene10005  | Potri.017G136000.1 | 34.9056 | 146.0146 | -2.0646 | Down | 2.21E-202 | 1.17E-200 |
| Unigene85241  | Potri.002G160900.4 | 17.805  | 74.4896  | -2.0648 | Down | 1.24E-62  | 1.55E-61  |
| Unigene28249  | Potri.001G051200.2 | 25.9589 | 108.6201 | -2.065  | Down | 1.20E-177 | 5.36E-176 |
| Unigene1729   | Potri.T119700.1    | 2.8692  | 12.008   | -2.0653 | Down | 8.71E-25  | 4.53E-24  |
| Unigene43165  | Potri.016G042000.1 | 1.5492  | 6.4836   | -2.0653 | Down | 4.10E-13  | 1.37E-12  |
| Unigene27259  | Potri.014G096700.1 | 15.3124 | 64.0848  | -2.0653 | Down | 4.00E-71  | 5.72E-70  |
| Unigene99804  | Potri.006G253500.3 | 1.6163  | 6.7645   | -2.0653 | Down | 4.10E-13  | 1.37E-12  |
| Unigene7031   | Potri.001G135500.2 | 1.4199  | 5.9425   | -2.0653 | Down | 4.10E-13  | 1.37E-12  |
| Unigene16496  | Potri.014G072400.3 | 14.8935 | 62.3368  | -2.0654 | Down | 5.30E-52  | 5.40E-51  |
| Unigene82202  | Potri.005G080700.4 | 13.7721 | 57.6503  | -2.0656 | Down | 1.94E-44  | 1.68E-43  |
| Unigene54238  | Potri.012G074800.1 | 11.1105 | 46.5122  | -2.0657 | Down | 7.59E-33  | 4.99E-32  |
| Unigene89619  | Potri.001G333900.1 | 20.9875 | 87.8702  | -2.0658 | Down | 1.23E-91  | 2.34E-90  |
| Unigene72767  | Potri.006G220900.5 | 7.8903  | 33.0369  | -2.0659 | Down | 3.20E-21  | 1.48E-20  |
| Unigene49585  | Potri.001G018100.2 | 5.2267  | 21.8843  | -2.0659 | Down | 3.20E-21  | 1.48E-20  |
| Unigene33935  | Potri.006G175200.1 | 7.9198  | 33.1666  | -2.0662 | Down | 5.88E-57  | 6.61E-56  |
| Unigene22677  | Potri.006G227300.2 | 4.0751  | 17.0686  | -2.0664 | Down | 2.22E-45  | 1.96E-44  |
| Unigene34784  | Potri.014G016200.1 | 3.0076  | 12.5976  | -2.0665 | Down | 2.13E-49  | 2.06E-48  |
| Unigene33001  | Potri.008G059800.1 | 4.3906  | 18.3906  | -2.0665 | Down | 4.70E-97  | 9.68E-96  |
| Unigene21239  | Potri.001G327300.1 | 17.8461 | 74.7534  | -2.0665 | Down | 0         | 0         |
| Unigene22931  | Potri.010G253100.4 | 1.8881  | 7.9105   | -2.0668 | Down | 1.08E-21  | 5.06E-21  |
| Unigene28243  | Potri.009G159000.1 | 2.0102  | 8.422    | -2.0668 | Down | 1.65E-09  | 4.58E-09  |
| Unigene31264  | Potri.006G067100.1 | 1.0021  | 4.1985   | -2.0668 | Down | 1.65E-09  | 4.58E-09  |
| Unigene12092  | Potri.002G140200.1 | 2.0012  | 8.3844   | -2.0668 | Down | 1.19E-17  | 4.86E-17  |
| Unigene114145 | Potri.001G207500.1 | 1.2668  | 5.3075   | -2.0668 | Down | 2.28E-05  | 4.67E-05  |
| Unigene37075  | Potri.T059200.1    | 1.3321  | 5.5813   | -2.0669 | Down | 1.65E-09  | 4.58E-09  |
| Unigene102698 | Potri.017G007700.1 | 1.1904  | 4.9875   | -2.0669 | Down | 2.28E-05  | 4.67E-05  |
| Unigene17642  | Potri.016G059900.2 | 1.4194  | 5.9471   | -2.0669 | Down | 1.65E-09  | 4.58E-09  |
| Unigene16823  | Potri.016G018500.2 | 1.4532  | 6.0887   | -2.0669 | Down | 2.28E-05  | 4.67E-05  |
| Unigene13414  | Potri.014G179700.1 | 6.8685  | 28.7771  | -2.0669 | Down | 8.65E-34  | 5.81E-33  |
| Unigene18648  | Potri.014G153700.1 | 7.1526  | 29.9677  | -2.0669 | Down | 6.55E-62  | 8.05E-61  |
| Unigene103701 | Potri.008G008200.1 | 1.4224  | 5.9597   | -2.0669 | Down | 2.28E-05  | 4.67E-05  |
| Unigene82264  | Potri.007G027500.3 | 11.6202 | 48.6859  | -2.0669 | Down | 8.20E-38  | 6.11E-37  |
| Unigene113500 | Potri.006G149000.2 | 1.3113  | 5.4941   | -2.0669 | Down | 2.28E-05  | 4.67E-05  |
| Unigene30630  | Potri.005G098500.2 | 1.4854  | 6.2234   | -2.0669 | Down | 2.28E-05  | 4.67E-05  |
| Unigene49353  | Potri.004G222100.1 | 1.8048  | 7.5617   | -2.0669 | Down | 1.65E-09  | 4.58E-09  |

|               |                    |         |          |         |      |           |           |
|---------------|--------------------|---------|----------|---------|------|-----------|-----------|
| Unigene46648  | Potri.003G151500.1 | 1.519   | 6.3642   | -2.0669 | Down | 2.28E-05  | 4.67E-05  |
| Unigene35741  | Potri.002G137400.2 | 16.4903 | 69.0904  | -2.0669 | Down | 6.75E-58  | 7.72E-57  |
| Unigene116259 | Potri.002G127600.1 | 1.0725  | 4.4936   | -2.0669 | Down | 2.28E-05  | 4.67E-05  |
| Unigene37793  | Potri.002G097400.2 | 4.7281  | 19.8096  | -2.0669 | Down | 1.19E-17  | 4.86E-17  |
| Unigene118122 | Potri.001G166800.3 | 4.1039  | 17.1942  | -2.0669 | Down | 1.08E-21  | 5.06E-21  |
| Unigene32485  | Potri.008G138900.1 | 8.3433  | 34.9638  | -2.0672 | Down | 2.22E-62  | 2.75E-61  |
| Unigene32310  | Potri.001G108300.1 | 2.8242  | 11.8366  | -2.0673 | Down | 2.77E-38  | 2.09E-37  |
| Unigene68380  | Potri.004G168500.1 | 12.8741 | 53.9603  | -2.0674 | Down | 6.47E-132 | 1.96E-130 |
| Unigene1529   | Potri.002G225600.7 | 22.4225 | 93.9769  | -2.0674 | Down | 1.96E-188 | 9.49E-187 |
| Unigene66262  | Potri.002G137800.1 | 10.2318 | 42.8909  | -2.0676 | Down | 8.27E-51  | 8.20E-50  |
| Unigene4849   | Potri.009G071600.1 | 8.494   | 35.6097  | -2.0678 | Down | 3.62E-22  | 1.73E-21  |
| Unigene49420  | Potri.016G110500.1 | 2.6694  | 11.1928  | -2.068  | Down | 4.00E-18  | 1.66E-17  |
| Unigene19998  | Potri.016G002600.1 | 3.594   | 15.0695  | -2.068  | Down | 4.00E-18  | 1.66E-17  |
| Unigene40078  | Potri.006G031800.1 | 9.6209  | 40.3447  | -2.0681 | Down | 8.88E-60  | 1.05E-58  |
| Unigene2625   | Potri.002G029300.2 | 15.6902 | 65.7944  | -2.0681 | Down | 2.72E-76  | 4.22E-75  |
| Unigene39443  | Potri.012G097100.1 | 5.6221  | 23.5771  | -2.0682 | Down | 3.02E-43  | 2.56E-42  |
| Unigene70652  | Potri.017G026300.1 | 5.2219  | 21.9009  | -2.0683 | Down | 4.57E-14  | 1.60E-13  |
| Unigene82072  | Potri.014G169500.1 | 4.0324  | 16.9119  | -2.0683 | Down | 4.57E-14  | 1.60E-13  |
| Unigene108584 | Potri.009G121200.1 | 5.0211  | 21.0586  | -2.0683 | Down | 4.57E-14  | 1.60E-13  |
| Unigene15920  | Potri.005G083200.1 | 8.3819  | 35.154   | -2.0683 | Down | 2.92E-64  | 3.75E-63  |
| Unigene4375   | Potri.005G077600.1 | 4.7908  | 20.0926  | -2.0683 | Down | 4.57E-14  | 1.60E-13  |
| Unigene32530  | Potri.014G133000.3 | 6.9679  | 29.2272  | -2.0685 | Down | 4.65E-190 | 2.28E-188 |
| Unigene24472  | Potri.019G034500.3 | 11.3894 | 47.7848  | -2.0689 | Down | 1.47E-149 | 5.26E-148 |
| Unigene18268  | Potri.016G134600.1 | 14.0715 | 59.0447  | -2.069  | Down | 3.83E-95  | 7.68E-94  |
| Unigene107280 | Potri.006G142100.4 | 7.0869  | 29.7371  | -2.069  | Down | 1.34E-18  | 5.67E-18  |
| Unigene75554  | Potri.005G229200.1 | 16.0337 | 67.2784  | -2.069  | Down | 3.46E-44  | 2.98E-43  |
| Unigene38683  | Potri.005G063900.1 | 2.1873  | 9.1781   | -2.069  | Down | 5.48E-10  | 1.56E-09  |
| Unigene73662  | Potri.001G298200.1 | 40.1146 | 168.3229 | -2.069  | Down | 1.26E-103 | 2.80E-102 |
| Unigene39024  | Potri.001G135300.1 | 1.9741  | 8.2833   | -2.069  | Down | 5.48E-10  | 1.56E-09  |
| Unigene64277  | Potri.001G130900.1 | 3.4072  | 14.2967  | -2.069  | Down | 5.48E-10  | 1.56E-09  |
| Unigene1877   | Potri.004G150100.1 | 1.5406  | 6.4646   | -2.0691 | Down | 5.48E-10  | 1.56E-09  |
| Unigene34581  | Potri.012G065000.1 | 2.8891  | 12.1252  | -2.0693 | Down | 1.19E-31  | 7.58E-31  |
| Unigene11062  | Potri.006G250700.1 | 2.3247  | 9.7566   | -2.0693 | Down | 1.17E-61  | 1.43E-60  |
| Unigene11751  | Potri.015G031100.1 | 8.955   | 37.5845  | -2.0694 | Down | 1.45E-104 | 3.27E-103 |
| Unigene8121   | Potri.006G004700.1 | 7.3079  | 30.6743  | -2.0695 | Down | 1.20E-57  | 1.37E-56  |
| Unigene33778  | Potri.017G099000.1 | 2.4152  | 10.1384  | -2.0696 | Down | 3.81E-49  | 3.65E-48  |
| Unigene74292  | Potri.014G017000.2 | 10.0622 | 42.2412  | -2.0697 | Down | 1.27E-27  | 7.22E-27  |
| Unigene13264  | Potri.011G074400.1 | 2.2629  | 9.4998   | -2.0697 | Down | 1.53E-14  | 5.45E-14  |
| Unigene84688  | Potri.003G170800.1 | 60.6615 | 254.697  | -2.0699 | Down | 4.90E-206 | 2.64E-204 |

|               |                    |          |          |         |      |           |           |
|---------------|--------------------|----------|----------|---------|------|-----------|-----------|
| Unigene50889  | Potri.002G068400.1 | 16.9149  | 71.025   | -2.07   | Down | 1.46E-71  | 2.11E-70  |
| Unigene48243  | Potri.003G075100.1 | 4.2016   | 17.6445  | -2.0702 | Down | 1.38E-23  | 6.89E-23  |
| Unigene40810  | Potri.012G074300.2 | 8.4383   | 35.442   | -2.0704 | Down | 1.36E-32  | 8.86E-32  |
| Unigene108624 | Potri.006G108800.1 | 12.3734  | 51.9703  | -2.0704 | Down | 1.36E-32  | 8.86E-32  |
| Unigene22263  | Potri.016G016900.1 | 11.9714  | 50.2889  | -2.0706 | Down | 1.36E-152 | 5.01E-151 |
| Unigene32866  | Potri.006G266400.2 | 2.8942   | 12.1572  | -2.0706 | Down | 1.40E-41  | 1.14E-40  |
| Unigene54450  | Potri.014G048400.1 | 16.8131  | 70.6285  | -2.0707 | Down | 4.83E-55  | 5.22E-54  |
| Unigene46409  | Potri.015G130800.1 | 1.2559   | 5.2768   | -2.0709 | Down | 7.38E-06  | 1.58E-05  |
| Unigene21133  | Potri.008G077800.1 | 1.1168   | 4.6923   | -2.0709 | Down | 7.38E-06  | 1.58E-05  |
| Unigene1760   | Potri.006G015400.1 | 1.5607   | 6.5574   | -2.0709 | Down | 5.10E-15  | 1.86E-14  |
| Unigene91849  | Potri.001G216600.1 | 93.502   | 392.8513 | -2.0709 | Down | 0         | 0         |
| Unigene108828 | Potri.019G051300.1 | 3.5523   | 14.9259  | -2.071  | Down | 1.82E-10  | 5.32E-10  |
| Unigene43538  | Potri.014G167400.1 | 1.5089   | 6.3399   | -2.071  | Down | 4.64E-24  | 2.35E-23  |
| Unigene16857  | Potri.010G189700.1 | 1.4685   | 6.1702   | -2.071  | Down | 7.38E-06  | 1.58E-05  |
| Unigene53040  | Potri.009G165200.3 | 7.278    | 30.58    | -2.071  | Down | 1.51E-19  | 6.63E-19  |
| Unigene38564  | Potri.006G158100.2 | 4.3574   | 18.3087  | -2.071  | Down | 4.64E-24  | 2.35E-23  |
| Unigene100741 | Potri.005G183500.1 | 1.0136   | 4.2588   | -2.071  | Down | 7.38E-06  | 1.58E-05  |
| Unigene95736  | Potri.005G179700.1 | 3.5299   | 14.8318  | -2.071  | Down | 1.45E-28  | 8.43E-28  |
| Unigene112742 | Potri.005G146000.2 | 3.0325   | 12.7417  | -2.071  | Down | 1.82E-10  | 5.32E-10  |
| Unigene105365 | Potri.004G206300.3 | 0.9764   | 4.1027   | -2.071  | Down | 7.38E-06  | 1.58E-05  |
| Unigene26468  | Potri.003G131900.1 | 0.9764   | 4.1027   | -2.071  | Down | 7.38E-06  | 1.58E-05  |
| Unigene86986  | Potri.003G012300.1 | 2.4142   | 10.1438  | -2.071  | Down | 1.82E-10  | 5.32E-10  |
| Unigene15335  | Potri.001G060100.2 | 1.1955   | 5.0232   | -2.071  | Down | 7.38E-06  | 1.58E-05  |
| Unigene50755  | Potri.003G018900.1 | 3.8934   | 16.3641  | -2.0714 | Down | 2.22E-74  | 3.33E-73  |
| Unigene34056  | Potri.006G214600.1 | 7.4712   | 31.4042  | -2.0715 | Down | 6.15E-61  | 7.44E-60  |
| Unigene85481  | Potri.019G116300.1 | 84.1498  | 353.741  | -2.0717 | Down | 9.37E-294 | 8.08E-292 |
| Unigene74531  | Potri.018G076600.3 | 26.4205  | 111.0674 | -2.0717 | Down | 2.27E-70  | 3.21E-69  |
| Unigene1657   | Potri.012G116700.5 | 2.2164   | 9.3183   | -2.0718 | Down | 5.08E-20  | 2.26E-19  |
| Unigene43300  | Potri.004G015300.1 | 44.4134  | 186.7162 | -2.0718 | Down | 0         | 0         |
| Unigene103533 | Potri.011G053800.1 | 2.6186   | 11.0096  | -2.0719 | Down | 1.67E-38  | 1.27E-37  |
| Unigene99091  | Potri.003G051200.1 | 2.5111   | 10.5577  | -2.0719 | Down | 5.08E-20  | 2.26E-19  |
| Unigene8666   | Potri.016G029100.2 | 9.6107   | 40.4162  | -2.0722 | Down | 1.96E-122 | 5.41E-121 |
| Unigene20592  | Potri.015G010400.1 | 3.8543   | 16.208   | -2.0722 | Down | 1.71E-15  | 6.35E-15  |
| Unigene34991  | Potri.012G129700.1 | 5.5358   | 23.2803  | -2.0722 | Down | 7.89E-67  | 1.06E-65  |
| Unigene12512  | Potri.001G095500.1 | 1.7232   | 7.2465   | -2.0722 | Down | 1.71E-15  | 6.35E-15  |
| Unigene72848  | Potri.005G195700.1 | 102.5738 | 431.4114 | -2.0724 | Down | 3.26E-258 | 2.35E-256 |
| Unigene27999  | Potri.002G030800.1 | 3.5458   | 14.9133  | -2.0724 | Down | 5.25E-25  | 2.75E-24  |
| Unigene81604  | Potri.016G098200.1 | 119.3586 | 502.0787 | -2.0726 | Down | 0         | 0         |
| Unigene60456  | Potri.006G129000.3 | 1.3436   | 5.6521   | -2.0727 | Down | 6.03E-11  | 1.81E-10  |

|               |                    |         |          |         |      |           |           |
|---------------|--------------------|---------|----------|---------|------|-----------|-----------|
| Unigene11587  | Potri.015G051800.1 | 5.032   | 21.1709  | -2.0729 | Down | 8.83E-125 | 2.49E-123 |
| Unigene45201  | Potri.006G258300.1 | 11.0589 | 46.5368  | -2.0732 | Down | 1.16E-130 | 3.47E-129 |
| Unigene30111  | Potri.001G087700.1 | 2.7189  | 11.4423  | -2.0733 | Down | 5.71E-16  | 2.17E-15  |
| Unigene43207  | Potri.001G274900.1 | 17.2057 | 72.4261  | -2.0736 | Down | 1.35E-127 | 3.91E-126 |
| Unigene21924  | Potri.001G129800.1 | 20.7159 | 87.2242  | -2.074  | Down | 5.16E-173 | 2.22E-171 |
| Unigene22505  | Potri.002G148100.2 | 11.2179 | 47.2352  | -2.0741 | Down | 1.07E-109 | 2.57E-108 |
| Unigene47577  | Potri.017G145300.1 | 0.8141  | 3.4285   | -2.0743 | Down | 2.40E-06  | 5.35E-06  |
| Unigene9720   | Potri.010G106100.1 | 2.6817  | 11.2939  | -2.0743 | Down | 2.00E-11  | 6.18E-11  |
| Unigene1752   | Potri.009G110900.1 | 2.4569  | 10.3471  | -2.0743 | Down | 2.00E-11  | 6.18E-11  |
| Unigene24125  | Potri.006G037300.1 | 0.8638  | 3.6378   | -2.0743 | Down | 2.40E-06  | 5.35E-06  |
| Unigene51135  | Potri.004G036900.1 | 0.7698  | 3.242    | -2.0743 | Down | 2.40E-06  | 5.34E-06  |
| Unigene113161 | Potri.019G063500.2 | 1.6346  | 6.8843   | -2.0744 | Down | 2.40E-06  | 5.35E-06  |
| Unigene105023 | Potri.016G139900.1 | 1.6379  | 6.8981   | -2.0744 | Down | 2.00E-11  | 6.18E-11  |
| Unigene66300  | Potri.016G091400.1 | 2.7785  | 11.7018  | -2.0744 | Down | 1.91E-16  | 7.41E-16  |
| Unigene99494  | Potri.010G251800.1 | 0.8396  | 3.5361   | -2.0744 | Down | 1.91E-16  | 7.41E-16  |
| Unigene36403  | Potri.010G223400.1 | 1.0387  | 4.3746   | -2.0744 | Down | 2.40E-06  | 5.35E-06  |
| Unigene48437  | Potri.009G023100.1 | 1.8565  | 7.8188   | -2.0744 | Down | 2.40E-06  | 5.35E-06  |
| Unigene24212  | Potri.013G151600.2 | 14.6677 | 61.7931  | -2.0748 | Down | 0         | 0         |
| Unigene50638  | Potri.005G053200.1 | 11.2121 | 47.2415  | -2.075  | Down | 9.88E-93  | 1.92E-91  |
| Unigene43208  | Potri.014G134900.1 | 8.5006  | 35.82    | -2.0751 | Down | 3.79E-98  | 7.93E-97  |
| Unigene23481  | Potri.006G130500.1 | 4.8511  | 20.441   | -2.0751 | Down | 2.85E-42  | 2.36E-41  |
| Unigene81264  | Potri.003G131300.5 | 11.6469 | 49.08    | -2.0752 | Down | 2.62E-37  | 1.93E-36  |
| Unigene28667  | Potri.015G103500.6 | 4.026   | 16.9671  | -2.0753 | Down | 2.43E-32  | 1.57E-31  |
| Unigene10053  | Potri.005G125600.1 | 3.0707  | 12.941   | -2.0753 | Down | 6.40E-17  | 2.53E-16  |
| Unigene29398  | Potri.001G098700.3 | 1.1066  | 4.6637   | -2.0753 | Down | 6.40E-17  | 2.53E-16  |
| Unigene32086  | Potri.013G058100.1 | 13.7782 | 58.0689  | -2.0754 | Down | 7.19E-191 | 3.54E-189 |
| Unigene36418  | Potri.001G312800.2 | 1.907   | 8.037    | -2.0754 | Down | 6.40E-17  | 2.53E-16  |
| Unigene37864  | Potri.001G072000.1 | 10.193  | 42.9608  | -2.0754 | Down | 9.64E-43  | 8.05E-42  |
| Unigene103306 | Potri.006G057400.7 | 1.4493  | 6.1086   | -2.0755 | Down | 2.28E-27  | 1.28E-26  |
| Unigene12345  | Potri.005G080100.2 | 4.7351  | 19.9584  | -2.0755 | Down | 2.28E-27  | 1.28E-26  |
| Unigene9540   | Potri.004G217800.4 | 7.0167  | 29.5753  | -2.0755 | Down | 2.28E-27  | 1.28E-26  |
| Unigene39571  | Potri.003G097800.1 | 4.3232  | 18.2227  | -2.0756 | Down | 1.66E-63  | 2.10E-62  |
| Unigene30218  | Potri.017G007800.1 | 11.6245 | 49.0063  | -2.0758 | Down | 1.34E-53  | 1.41E-52  |
| Unigene2773   | Potri.007G053200.1 | 31.9987 | 134.9025 | -2.0758 | Down | 9.89E-225 | 5.90E-223 |
| Unigene3279   | Potri.007G000400.3 | 9.6939  | 40.8744  | -2.076  | Down | 1.33E-90  | 2.51E-89  |
| Unigene82729  | Potri.003G194000.2 | 14.7496 | 62.1878  | -2.076  | Down | 1.21E-48  | 1.15E-47  |
| Unigene4302   | Potri.002G106800.1 | 26.6425 | 112.3324 | -2.076  | Down | 3.47E-85  | 6.12E-84  |
| Unigene13139  | Potri.019G055700.1 | 6.5973  | 27.8205  | -2.0762 | Down | 1.66E-164 | 6.74E-163 |
| Unigene1509   | Potri.004G112900.1 | 9.2652  | 39.0713  | -2.0762 | Down | 7.54E-107 | 1.75E-105 |

|               |                    |         |         |         |      |           |           |
|---------------|--------------------|---------|---------|---------|------|-----------|-----------|
| Unigene32937  | Potri.004G038000.1 | 10.5429 | 44.459  | -2.0762 | Down | 2.87E-180 | 1.31E-178 |
| Unigene106353 | Potri.002G128200.1 | 1.7786  | 7.5005  | -2.0762 | Down | 2.14E-17  | 8.64E-17  |
| Unigene15695  | Potri.015G067200.1 | 16.2172 | 68.3897 | -2.0763 | Down | 6.44E-65  | 8.35E-64  |
| Unigene12007  | Potri.001G357100.3 | 3.2637  | 13.7634 | -2.0763 | Down | 2.76E-33  | 1.84E-32  |
| Unigene70350  | Potri.001G297500.1 | 5.16    | 21.7604 | -2.0763 | Down | 4.10E-49  | 3.93E-48  |
| Unigene23439  | Potri.013G043100.1 | 2.1643  | 9.1285  | -2.0765 | Down | 7.33E-23  | 3.58E-22  |
| Unigene20197  | Potri.003G108900.1 | 14.7939 | 62.3973 | -2.0765 | Down | 1.35E-86  | 2.43E-85  |
| Unigene36683  | Potri.001G366300.2 | 7.0975  | 29.9355 | -2.0765 | Down | 7.33E-23  | 3.58E-22  |
| Unigene8285   | Potri.001G155200.2 | 2.5555  | 10.7785 | -2.0765 | Down | 7.33E-23  | 3.58E-22  |
| Unigene38499  | Potri.T043600.1    | 3.3033  | 13.9388 | -2.0771 | Down | 2.47E-23  | 1.22E-22  |
| Unigene3575   | Potri.017G012600.2 | 1.9893  | 8.3942  | -2.0771 | Down | 7.82E-07  | 1.82E-06  |
| Unigene18851  | Potri.017G007200.1 | 3.4697  | 14.6411 | -2.0771 | Down | 2.22E-12  | 7.17E-12  |
| Unigene51718  | Potri.014G176400.1 | 1.865   | 7.8696  | -2.0771 | Down | 2.22E-12  | 7.16E-12  |
| Unigene101896 | Potri.012G054900.1 | 1.0721  | 4.5238  | -2.0771 | Down | 2.22E-12  | 7.17E-12  |
| Unigene100672 | Potri.010G048300.1 | 1.921   | 8.106   | -2.0771 | Down | 2.22E-12  | 7.17E-12  |
| Unigene86808  | Potri.005G080500.2 | 20.4782 | 86.4113 | -2.0771 | Down | 1.23E-77  | 1.94E-76  |
| Unigene9084   | Potri.004G137100.2 | 4.0324  | 17.0154 | -2.0771 | Down | 2.22E-12  | 7.16E-12  |
| Unigene42134  | Potri.003G189300.1 | 1.4255  | 6.015   | -2.0771 | Down | 7.82E-07  | 1.82E-06  |
| Unigene74303  | Potri.001G403300.1 | 16.6547 | 70.2774 | -2.0771 | Down | 4.26E-45  | 3.75E-44  |
| Unigene41927  | Potri.011G125800.3 | 2.5075  | 10.581  | -2.0772 | Down | 2.22E-12  | 7.16E-12  |
| Unigene8740   | Potri.003G148200.1 | 0.8691  | 3.6674  | -2.0772 | Down | 7.82E-07  | 1.82E-06  |
| Unigene114602 | Potri.001G116000.4 | 1.6395  | 6.9183  | -2.0772 | Down | 7.82E-07  | 1.82E-06  |
| Unigene1822   | Potri.003G142500.2 | 13.5567 | 57.2115 | -2.0773 | Down | 1.59E-83  | 2.73E-82  |
| Unigene23146  | Potri.018G039800.1 | 7.4908  | 31.6157 | -2.0774 | Down | 1.44E-45  | 1.28E-44  |
| Unigene12251  | Potri.005G044700.1 | 10.9307 | 46.1341 | -2.0774 | Down | 2.06E-89  | 3.83E-88  |
| Unigene23530  | Potri.015G014300.1 | 2.1962  | 9.2705  | -2.0776 | Down | 2.94E-29  | 1.75E-28  |
| Unigene19646  | Potri.005G250300.1 | 10.0847 | 42.5666 | -2.0776 | Down | 1.06E-34  | 7.31E-34  |
| Unigene19000  | Potri.015G012600.2 | 2.3299  | 9.8352  | -2.0777 | Down | 1.82E-51  | 1.83E-50  |
| Unigene3158   | Potri.003G037800.4 | 11.5158 | 48.6124 | -2.0777 | Down | 1.25E-73  | 1.87E-72  |
| Unigene10869  | Potri.018G085500.1 | 5.4046  | 22.8175 | -2.0779 | Down | 3.53E-185 | 1.67E-183 |
| Unigene51395  | Potri.010G087700.3 | 4.9502  | 20.8988 | -2.0779 | Down | 1.32E-40  | 1.05E-39  |
| Unigene4014   | Potri.T091800.1    | 10.9967 | 46.4291 | -2.078  | Down | 3.59E-35  | 2.50E-34  |
| Unigene90890  | Potri.005G236000.1 | 13.8702 | 58.5614 | -2.078  | Down | 1.12E-68  | 1.54E-67  |
| Unigene45057  | Potri.002G231700.1 | 8.8153  | 37.2207 | -2.078  | Down | 5.49E-80  | 9.00E-79  |
| Unigene51459  | Potri.010G036900.1 | 2.3849  | 10.072  | -2.0783 | Down | 7.39E-13  | 2.44E-12  |
| Unigene52052  | Potri.002G192300.1 | 2.8003  | 11.8263 | -2.0783 | Down | 7.39E-13  | 2.44E-12  |
| Unigene3630   | Potri.015G040300.3 | 8.1086  | 34.2448 | -2.0784 | Down | 1.21E-35  | 8.56E-35  |
| Unigene44266  | Potri.010G052200.2 | 1.4896  | 6.291   | -2.0784 | Down | 7.39E-13  | 2.44E-12  |
| Unigene10399  | Potri.008G120500.1 | 2.7266  | 11.5151 | -2.0784 | Down | 7.39E-13  | 2.44E-12  |

|               |                    |          |          |         |      |           |           |
|---------------|--------------------|----------|----------|---------|------|-----------|-----------|
| Unigene34348  | Potri.004G108200.1 | 1.6189   | 6.8371   | -2.0784 | Down | 7.39E-13  | 2.44E-12  |
| Unigene24059  | Potri.008G195900.4 | 36.3942  | 153.7398 | -2.0787 | Down | 0         | 0         |
| Unigene45071  | Potri.007G016900.2 | 2.7259   | 11.5147  | -2.0787 | Down | 1.89E-47  | 1.75E-46  |
| Unigene39774  | Potri.002G215600.2 | 10.0574  | 42.4888  | -2.0788 | Down | 3.04E-59  | 3.57E-58  |
| Unigene46756  | Potri.005G019000.1 | 13.332   | 56.3238  | -2.0789 | Down | 5.09E-42  | 4.18E-41  |
| Unigene26973  | Potri.003G113900.1 | 12.5745  | 53.1236  | -2.0789 | Down | 5.09E-42  | 4.18E-41  |
| Unigene42844  | Potri.011G123900.1 | 7.6272   | 32.2292  | -2.0791 | Down | 2.98E-286 | 2.49E-284 |
| Unigene359    | Potri.001G406500.1 | 4.7549   | 20.0926  | -2.0792 | Down | 2.83E-83  | 4.84E-82  |
| Unigene8472   | Potri.018G088200.1 | 1.8507   | 7.8223   | -2.0795 | Down | 2.71E-19  | 1.18E-18  |
| Unigene110303 | Potri.016G035400.1 | 2.1842   | 9.2317   | -2.0795 | Down | 2.56E-07  | 6.16E-07  |
| Unigene16152  | Potri.015G034000.1 | 5.5311   | 23.3777  | -2.0795 | Down | 2.71E-19  | 1.18E-18  |
| Unigene16729  | Potri.011G050900.3 | 1.5692   | 6.6325   | -2.0795 | Down | 2.56E-07  | 6.16E-07  |
| Unigene51000  | Potri.008G108100.1 | 1.4304   | 6.0456   | -2.0795 | Down | 2.56E-07  | 6.16E-07  |
| Unigene38886  | Potri.006G220900.5 | 4.9989   | 21.1283  | -2.0795 | Down | 3.17E-25  | 1.67E-24  |
| Unigene101715 | Potri.006G125400.3 | 2.2192   | 9.3796   | -2.0795 | Down | 2.46E-13  | 8.34E-13  |
| Unigene2411   | Potri.006G106000.1 | 2.2345   | 9.4444   | -2.0795 | Down | 2.71E-19  | 1.18E-18  |
| Unigene6778   | Potri.003G136000.1 | 2.3863   | 10.0859  | -2.0795 | Down | 3.81E-31  | 2.39E-30  |
| Unigene45563  | Potri.004G085100.1 | 9.8919   | 41.8143  | -2.0797 | Down | 6.59E-73  | 9.69E-72  |
| Unigene53046  | Potri.002G216200.2 | 14.2351  | 60.1807  | -2.0798 | Down | 1.58E-37  | 1.17E-36  |
| Unigene48610  | Potri.003G023000.1 | 8.2333   | 34.8093  | -2.0799 | Down | 1.29E-31  | 8.16E-31  |
| Unigene45764  | Potri.001G213400.6 | 12.7182  | 53.7722  | -2.08   | Down | 1.06E-55  | 1.16E-54  |
| Unigene2273   | Potri.001G092600.1 | 29.442   | 124.4823 | -2.08   | Down | 2.08E-283 | 1.70E-281 |
| Unigene51810  | Potri.002G073000.1 | 26.0157  | 110.0028 | -2.0801 | Down | 3.24E-152 | 1.19E-150 |
| Unigene3728   | Potri.001G418900.1 | 13.8202  | 58.4367  | -2.0801 | Down | 6.65E-44  | 5.69E-43  |
| Unigene20733  | Potri.001G255700.2 | 2.0438   | 8.6426   | -2.0802 | Down | 9.11E-20  | 4.02E-19  |
| Unigene46269  | Potri.012G118500.1 | 13.6213  | 57.6034  | -2.0803 | Down | 2.83E-50  | 2.78E-49  |
| Unigene32775  | Potri.009G127800.1 | 2.4453   | 10.3412  | -2.0803 | Down | 4.34E-32  | 2.79E-31  |
| Unigene21831  | Potri.006G164400.1 | 5.5663   | 23.5395  | -2.0803 | Down | 8.35E-99  | 1.77E-97  |
| Unigene88917  | Potri.001G141500.1 | 100.0799 | 423.2297 | -2.0803 | Down | 0         | 0         |
| Unigene119063 | Potri.T004400.1    | 1.7856   | 7.5525   | -2.0805 | Down | 8.22E-14  | 2.84E-13  |
| Unigene7741   | Potri.003G068700.1 | 4.737    | 20.0359  | -2.0805 | Down | 5.26E-63  | 6.59E-62  |
| Unigene13826  | Potri.008G136100.1 | 22.9367  | 97.0243  | -2.0807 | Down | 0         | 0         |
| Unigene44498  | Potri.018G121500.1 | 1.7183   | 7.2695   | -2.0809 | Down | 3.06E-20  | 1.37E-19  |
| Unigene45995  | Potri.004G172000.1 | 12.7396  | 53.9104  | -2.0812 | Down | 8.70E-46  | 7.77E-45  |
| Unigene20532  | Potri.019G112400.1 | 36.1308  | 152.9118 | -2.0814 | Down | 0         | 0         |
| Unigene35601  | Potri.017G142600.3 | 1.8132   | 7.6743   | -2.0815 | Down | 8.39E-08  | 2.09E-07  |
| Unigene114207 | Potri.015G000500.1 | 1.9631   | 8.309    | -2.0815 | Down | 8.39E-08  | 2.09E-07  |
| Unigene4319   | Potri.012G130600.1 | 1.6684   | 7.0613   | -2.0815 | Down | 8.39E-08  | 2.09E-07  |
| Unigene47680  | Potri.004G136700.1 | 1.2958   | 5.4843   | -2.0815 | Down | 8.39E-08  | 2.09E-07  |



|               |                    |          |          |         |      |           |           |
|---------------|--------------------|----------|----------|---------|------|-----------|-----------|
| Unigene26613  | Potri.002G047200.1 | 1.892    | 8.0079   | -2.0815 | Down | 8.39E-08  | 2.09E-07  |
| Unigene45993  | Potri.001G197600.3 | 5.4776   | 23.1838  | -2.0815 | Down | 1.03E-20  | 4.69E-20  |
| Unigene13097  | Potri.001G028100.2 | 1.0382   | 4.394    | -2.0815 | Down | 2.74E-14  | 9.69E-14  |
| Unigene118960 | Potri.013G033800.1 | 0.9797   | 4.1467   | -2.0816 | Down | 8.39E-08  | 2.09E-07  |
| Unigene72838  | Potri.010G218700.2 | 65.4535  | 277.0461 | -2.0816 | Down | 1.77E-167 | 7.33E-166 |
| Unigene91588  | Potri.013G068300.2 | 20.9156  | 88.5389  | -2.0817 | Down | 8.58E-111 | 2.09E-109 |
| Unigene44143  | Potri.017G026500.1 | 12.5432  | 53.1061  | -2.082  | Down | 2.23E-105 | 5.07E-104 |
| Unigene13016  | Potri.001G079100.1 | 4.019    | 17.016   | -2.082  | Down | 1.44E-53  | 1.51E-52  |
| Unigene48545  | Potri.008G049500.1 | 5.6574   | 23.9552  | -2.0821 | Down | 7.94E-41  | 6.36E-40  |
| Unigene50627  | Potri.008G002300.2 | 7.1135   | 30.1222  | -2.0822 | Down | 4.87E-54  | 5.16E-53  |
| Unigene2487   | Potri.015G080000.2 | 13.3981  | 56.7391  | -2.0823 | Down | 8.03E-166 | 3.29E-164 |
| Unigene7575   | Potri.014G143600.1 | 10.5591  | 44.7159  | -2.0823 | Down | 8.70E-107 | 2.02E-105 |
| Unigene7263   | Potri.007G027900.1 | 14.989   | 63.4765  | -2.0823 | Down | 5.81E-120 | 1.57E-118 |
| Unigene52099  | Potri.003G172400.3 | 2.3113   | 9.7887   | -2.0824 | Down | 9.17E-15  | 3.31E-14  |
| Unigene8263   | Potri.003G075000.4 | 1.2491   | 5.29     | -2.0824 | Down | 9.17E-15  | 3.31E-14  |
| Unigene80219  | Potri.016G137900.1 | 195.4074 | 827.62   | -2.0825 | Down | 0         | 0         |
| Unigene31783  | Potri.007G004100.1 | 15.6477  | 66.2729  | -2.0825 | Down | 0         | 0         |
| Unigene18490  | Potri.008G046500.1 | 3.9494   | 16.7287  | -2.0826 | Down | 5.59E-55  | 6.03E-54  |
| Unigene82136  | Potri.004G153700.2 | 10.513   | 44.5296  | -2.0826 | Down | 6.41E-35  | 4.43E-34  |
| Unigene34456  | Potri.010G138100.1 | 4.1098   | 17.4091  | -2.0827 | Down | 8.17E-62  | 1.00E-60  |
| Unigene9563   | Potri.018G021100.1 | 10.4002  | 44.0585  | -2.0828 | Down | 1.78E-75  | 2.72E-74  |
| Unigene53486  | Potri.005G179500.4 | 11.0034  | 46.6148  | -2.0828 | Down | 1.56E-28  | 9.07E-28  |
| Unigene2074   | Potri.001G361200.2 | 4.8113   | 20.3843  | -2.083  | Down | 3.07E-143 | 1.03E-141 |
| Unigene22307  | Potri.001G262600.1 | 4.5002   | 19.0664  | -2.083  | Down | 6.02E-76  | 9.30E-75  |
| Unigene22890  | Potri.002G149200.1 | 8.8243   | 37.389   | -2.0831 | Down | 6.40E-56  | 7.05E-55  |
| Unigene100222 | Potri.016G126200.1 | 1.6194   | 6.8623   | -2.0832 | Down | 3.07E-15  | 1.13E-14  |
| Unigene113123 | Potri.015G134600.1 | 2.238    | 9.4837   | -2.0832 | Down | 2.76E-08  | 7.10E-08  |
| Unigene80341  | Potri.012G118100.2 | 2.2652   | 9.5989   | -2.0832 | Down | 2.76E-08  | 7.10E-08  |
| Unigene65077  | Potri.001G163900.3 | 1.865    | 7.9031   | -2.0832 | Down | 2.76E-08  | 7.10E-08  |
| Unigene24294  | Potri.019G032500.2 | 17.3854  | 73.6729  | -2.0833 | Down | 6.92E-77  | 1.08E-75  |
| Unigene118931 | Potri.018G025100.2 | 1.0677   | 4.5247   | -2.0833 | Down | 2.76E-08  | 7.10E-08  |
| Unigene20697  | Potri.017G155200.1 | 7.2007   | 30.5139  | -2.0833 | Down | 4.67E-70  | 6.58E-69  |
| Unigene4855   | Potri.014G046000.1 | 4.7616   | 20.1781  | -2.0833 | Down | 3.07E-15  | 1.13E-14  |
| Unigene72773  | Potri.011G075000.1 | 18.8291  | 79.7908  | -2.0833 | Down | 1.49E-49  | 1.44E-48  |
| Unigene7280   | Potri.009G122800.1 | 5.5616   | 23.5679  | -2.0833 | Down | 7.31E-36  | 5.19E-35  |
| Unigene74222  | Potri.007G086900.3 | 20.8184  | 88.2205  | -2.0833 | Down | 2.17E-56  | 2.41E-55  |
| Unigene1916   | Potri.006G265200.1 | 1.358    | 5.7547   | -2.0833 | Down | 2.76E-08  | 7.10E-08  |
| Unigene113747 | Potri.006G137900.1 | 6.4806   | 27.4625  | -2.0833 | Down | 3.90E-22  | 1.86E-21  |
| Unigene118340 | Potri.004G205500.1 | 1.3011   | 5.5138   | -2.0833 | Down | 2.76E-08  | 7.10E-08  |

|               |                    |         |          |         |      |           |           |
|---------------|--------------------|---------|----------|---------|------|-----------|-----------|
| Unigene20994  | Potri.003G196600.1 | 1.1754  | 4.9809   | -2.0833 | Down | 2.76E-08  | 7.10E-08  |
| Unigene9573   | Potri.001G379700.2 | 1.1395  | 4.8288   | -2.0833 | Down | 2.76E-08  | 7.10E-08  |
| Unigene60063  | Potri.001G166900.1 | 3.188   | 13.5096  | -2.0833 | Down | 3.07E-15  | 1.13E-14  |
| Unigene17181  | Potri.018G000800.2 | 5.9805  | 25.3489  | -2.0836 | Down | 2.47E-36  | 1.77E-35  |
| Unigene10680  | Potri.012G129900.1 | 2.771   | 11.7452  | -2.0836 | Down | 2.47E-36  | 1.77E-35  |
| Unigene789    | Potri.010G067200.1 | 5.394   | 22.8653  | -2.0837 | Down | 1.82E-71  | 2.62E-70  |
| Unigene79386  | Potri.008G168600.1 | 9.402   | 39.8531  | -2.0837 | Down | 1.77E-29  | 1.06E-28  |
| Unigene47563  | Potri.007G121800.2 | 4.6434  | 19.6825  | -2.0837 | Down | 1.77E-29  | 1.06E-28  |
| Unigene82208  | Potri.018G047700.8 | 68.8607 | 291.961  | -2.084  | Down | 2.52E-220 | 1.47E-218 |
| Unigene21521  | Potri.014G177400.1 | 4.016   | 17.0266  | -2.084  | Down | 4.18E-65  | 5.43E-64  |
| Unigene9558   | Potri.006G129000.2 | 3.6942  | 15.6632  | -2.084  | Down | 1.03E-15  | 3.85E-15  |
| Unigene39243  | Potri.017G152600.1 | 6.7817  | 28.7542  | -2.0841 | Down | 5.98E-30  | 3.62E-29  |
| Unigene41401  | Potri.007G003600.1 | 24.8073 | 105.1879 | -2.0841 | Down | 9.55E-257 | 6.83E-255 |
| Unigene27700  | Potri.006G154800.1 | 2.0947  | 8.8815   | -2.0841 | Down | 1.03E-15  | 3.85E-15  |
| Unigene18926  | Potri.004G222000.1 | 3.4311  | 14.5478  | -2.0841 | Down | 5.98E-30  | 3.62E-29  |
| Unigene9024   | Potri.005G186900.1 | 12.5947 | 53.4063  | -2.0842 | Down | 2.82E-37  | 2.07E-36  |
| Unigene42717  | Potri.001G016600.1 | 5.9818  | 25.3646  | -2.0842 | Down | 9.54E-151 | 3.45E-149 |
| Unigene26056  | Potri.016G075700.2 | 4.4047  | 18.6791  | -2.0843 | Down | 4.41E-23  | 2.17E-22  |
| Unigene13552  | Potri.T046200.1    | 17.9245 | 76.017   | -2.0844 | Down | 1.21E-80  | 2.00E-79  |
| Unigene2294   | Potri.006G244400.6 | 3.878   | 16.4463  | -2.0844 | Down | 6.62E-52  | 6.72E-51  |
| Unigene27676  | Potri.003G045700.5 | 10.1532 | 43.0638  | -2.0845 | Down | 4.58E-45  | 4.02E-44  |
| Unigene118951 | Potri.005G033700.2 | 1.126   | 4.7767   | -2.0848 | Down | 9.09E-09  | 2.41E-08  |
| Unigene26300  | Potri.004G095400.6 | 5.3285  | 22.6042  | -2.0848 | Down | 1.49E-23  | 7.42E-23  |
| Unigene43686  | Potri.001G266400.1 | 8.8921  | 37.7266  | -2.085  | Down | 2.57E-53  | 2.68E-52  |
| Unigene44281  | Potri.004G048500.1 | 3.103   | 13.1676  | -2.0853 | Down | 5.00E-24  | 2.54E-23  |
| Unigene36137  | Potri.010G198800.8 | 28.0341 | 119.0199 | -2.0859 | Down | 1.42E-109 | 3.41E-108 |
| Unigene44459  | Potri.013G041300.1 | 11.3387 | 48.1449  | -2.0861 | Down | 9.47E-103 | 2.09E-101 |
| Unigene54212  | Potri.004G009600.1 | 3.5926  | 15.2544  | -2.0861 | Down | 3.85E-17  | 1.54E-16  |
| Unigene40649  | Potri.002G069000.1 | 2.0722  | 8.7987   | -2.0861 | Down | 3.00E-09  | 8.19E-09  |
| Unigene26609  | Potri.014G003800.1 | 1.8065  | 7.6707   | -2.0862 | Down | 3.00E-09  | 8.19E-09  |
| Unigene43929  | Potri.009G130000.1 | 1.5097  | 6.4105   | -2.0862 | Down | 3.00E-09  | 8.19E-09  |
| Unigene4009   | Potri.005G105400.1 | 3.0632  | 13.0068  | -2.0862 | Down | 3.85E-17  | 1.54E-16  |
| Unigene28004  | Potri.001G292700.5 | 1.6909  | 7.1798   | -2.0862 | Down | 3.00E-09  | 8.19E-09  |
| Unigene18292  | Potri.013G027300.1 | 3.9716  | 16.8657  | -2.0863 | Down | 1.31E-56  | 1.46E-55  |
| Unigene12110  | Potri.007G082300.2 | 2.5292  | 10.7407  | -2.0863 | Down | 7.85E-49  | 7.48E-48  |
| Unigene34185  | Potri.009G061000.4 | 9.9571  | 42.2853  | -2.0864 | Down | 3.67E-88  | 6.72E-87  |
| Unigene26831  | Potri.018G045800.2 | 19.9956 | 84.9275  | -2.0865 | Down | 4.27E-73  | 6.29E-72  |
| Unigene31235  | Potri.001G004800.1 | 6.2772  | 26.6595  | -2.0865 | Down | 2.97E-33  | 1.97E-32  |
| Unigene1530   | Potri.018G131800.1 | 5.3905  | 22.8962  | -2.0866 | Down | 1.62E-41  | 1.32E-40  |

|               |                    |         |          |         |      |           |           |
|---------------|--------------------|---------|----------|---------|------|-----------|-----------|
| Unigene76669  | Potri.016G081300.1 | 11.5021 | 48.8595  | -2.0867 | Down | 1.00E-33  | 6.73E-33  |
| Unigene55711  | Potri.013G047600.1 | 4.7996  | 20.3881  | -2.0867 | Down | 1.29E-17  | 5.25E-17  |
| Unigene11264  | Potri.010G200200.1 | 5.5225  | 23.4576  | -2.0867 | Down | 1.50E-57  | 1.70E-56  |
| Unigene1089   | Potri.001G050700.4 | 20.107  | 85.4116  | -2.0867 | Down | 0         | 0         |
| Unigene32577  | Potri.001G314800.1 | 4.8238  | 20.4952  | -2.087  | Down | 9.79E-67  | 1.31E-65  |
| Unigene27325  | Potri.015G079600.1 | 3.1521  | 13.3951  | -2.0873 | Down | 9.92E-10  | 2.78E-09  |
| Unigene52271  | Potri.015G011100.1 | 7.6877  | 32.6697  | -2.0873 | Down | 2.16E-26  | 1.18E-25  |
| Unigene48603  | Potri.006G003100.3 | 2.3599  | 10.0286  | -2.0873 | Down | 4.32E-18  | 1.79E-17  |
| Unigene97614  | Potri.003G073700.1 | 2.0786  | 8.8333   | -2.0873 | Down | 9.92E-10  | 2.78E-09  |
| Unigene11087  | Potri.005G247700.1 | 4.5542  | 19.3551  | -2.0874 | Down | 2.19E-76  | 3.41E-75  |
| Unigene43510  | Potri.006G034900.2 | 4.7844  | 20.3362  | -2.0876 | Down | 8.49E-94  | 1.67E-92  |
| Unigene10626  | Potri.004G160100.1 | 6.5494  | 27.8371  | -2.0876 | Down | 7.43E-77  | 1.16E-75  |
| Unigene34282  | Potri.010G094800.5 | 2.5416  | 10.8049  | -2.0879 | Down | 1.30E-35  | 9.19E-35  |
| Unigene22624  | Potri.008G195900.4 | 11.5973 | 49.3029  | -2.0879 | Down | 1.68E-86  | 3.00E-85  |
| Unigene28101  | Potri.013G127200.3 | 4.5706  | 19.4331  | -2.0881 | Down | 2.45E-27  | 1.38E-26  |
| Unigene37910  | Potri.008G170100.1 | 5.1702  | 21.9825  | -2.0881 | Down | 2.45E-27  | 1.38E-26  |
| Unigene48599  | Potri.007G076500.5 | 7.2276  | 30.7299  | -2.0881 | Down | 2.45E-27  | 1.38E-26  |
| Unigene38321  | Potri.002G149200.1 | 3.2719  | 13.9121  | -2.0881 | Down | 4.40E-36  | 3.14E-35  |
| Unigene6183   | Potri.014G147700.2 | 55.2866 | 235.0937 | -2.0882 | Down | 4.25E-269 | 3.24E-267 |
| Unigene32730  | Potri.001G444300.1 | 34.387  | 146.2154 | -2.0882 | Down | 0         | 0         |
| Unigene118935 | Potri.013G089000.1 | 1.3473  | 5.7298   | -2.0884 | Down | 3.28E-10  | 9.48E-10  |
| Unigene43978  | Potri.010G177200.2 | 3.6066  | 15.3379  | -2.0884 | Down | 4.86E-19  | 2.09E-18  |
| Unigene27050  | Potri.010G104500.1 | 13.2714 | 56.4399  | -2.0884 | Down | 2.76E-45  | 2.44E-44  |
| Unigene18866  | Potri.008G003700.1 | 1.31    | 5.571    | -2.0884 | Down | 4.86E-19  | 2.09E-18  |
| Unigene98778  | Potri.007G092800.2 | 2.4023  | 10.2166  | -2.0884 | Down | 3.28E-10  | 9.48E-10  |
| Unigene12537  | Potri.001G240200.4 | 7.3061  | 31.071   | -2.0884 | Down | 5.23E-54  | 5.54E-53  |
| Unigene13266  | Potri.T081600.1    | 7.4677  | 31.7606  | -2.0885 | Down | 2.55E-89  | 4.73E-88  |
| Unigene81589  | Potri.016G053700.2 | 14.0422 | 59.7262  | -2.0886 | Down | 9.34E-46  | 8.34E-45  |
| Unigene18478  | Potri.016G038600.1 | 2.86    | 12.1647  | -2.0886 | Down | 9.34E-46  | 8.34E-45  |
| Unigene723    | Potri.012G084700.1 | 8.6595  | 36.8331  | -2.0886 | Down | 1.15E-107 | 2.70E-106 |
| Unigene18687  | Potri.016G132000.1 | 18.2409 | 77.592   | -2.0887 | Down | 1.06E-134 | 3.30E-133 |
| Unigene75349  | Potri.014G052600.1 | 9.8335  | 41.8291  | -2.0887 | Down | 2.79E-28  | 1.61E-27  |
| Unigene25722  | Potri.009G155500.2 | 10.6413 | 45.2675  | -2.0888 | Down | 3.16E-46  | 2.85E-45  |
| Unigene39568  | Potri.005G042400.2 | 3.0369  | 12.9197  | -2.0889 | Down | 2.03E-55  | 2.21E-54  |
| Unigene47739  | Potri.013G009400.1 | 50.4187 | 214.5059 | -2.089  | Down | 1.84E-181 | 8.46E-180 |
| Unigene46586  | Potri.015G092900.1 | 31.0355 | 132.059  | -2.0892 | Down | 1.16E-201 | 6.07E-200 |
| Unigene2307   | Potri.017G088200.2 | 1.7471  | 7.4347   | -2.0893 | Down | 1.09E-10  | 3.23E-10  |
| Unigene10752  | Potri.005G236300.3 | 9.2645  | 39.4251  | -2.0893 | Down | 1.49E-230 | 9.19E-229 |
| Unigene117706 | Potri.015G144200.3 | 5.9206  | 25.1955  | -2.0894 | Down | 3.17E-29  | 1.88E-28  |

|               |                    |         |          |         |      |           |           |
|---------------|--------------------|---------|----------|---------|------|-----------|-----------|
| Unigene63616  | Potri.010G230700.1 | 3.008   | 12.8009  | -2.0894 | Down | 1.09E-10  | 3.23E-10  |
| Unigene19913  | Potri.002G102700.1 | 6.751   | 28.7297  | -2.0894 | Down | 5.48E-20  | 2.44E-19  |
| Unigene18563  | Potri.014G072000.1 | 5.1713  | 22.009   | -2.0895 | Down | 1.74E-66  | 2.32E-65  |
| Unigene15818  | Potri.018G086200.1 | 4.293   | 18.2729  | -2.0896 | Down | 1.07E-29  | 6.42E-29  |
| Unigene40138  | Potri.007G132900.2 | 2.4666  | 10.5     | -2.0898 | Down | 1.84E-20  | 8.32E-20  |
| Unigene27538  | Potri.007G052800.4 | 22.5504 | 95.998   | -2.0899 | Down | 1.01E-86  | 1.81E-85  |
| Unigene21049  | Potri.012G074700.1 | 26.0831 | 111.0456 | -2.09   | Down | 3.76E-182 | 1.74E-180 |
| Unigene27900  | Potri.008G091200.1 | 13.5486 | 57.6838  | -2.09   | Down | 5.14E-78  | 8.18E-77  |
| Unigene21995  | Potri.019G065500.1 | 4.5917  | 19.5505  | -2.0901 | Down | 7.77E-69  | 1.07E-67  |
| Unigene3234   | Potri.014G068400.1 | 1.1238  | 4.7853   | -2.0902 | Down | 3.61E-11  | 1.10E-10  |
| Unigene53196  | Potri.013G070700.4 | 3.1332  | 13.3415  | -2.0902 | Down | 3.61E-11  | 1.10E-10  |
| Unigene7167   | Potri.012G118600.1 | 1.3864  | 5.9033   | -2.0902 | Down | 3.61E-11  | 1.10E-10  |
| Unigene26920  | Potri.010G235900.1 | 5.4207  | 23.0822  | -2.0902 | Down | 6.18E-21  | 2.84E-20  |
| Unigene50985  | Potri.008G182300.1 | 2.2003  | 9.369    | -2.0902 | Down | 3.61E-11  | 1.10E-10  |
| Unigene27664  | Potri.006G090400.2 | 1.8344  | 7.8112   | -2.0902 | Down | 3.61E-11  | 1.10E-10  |
| Unigene94644  | Potri.004G063500.1 | 1.5006  | 6.3896   | -2.0902 | Down | 6.18E-21  | 2.84E-20  |
| Unigene63722  | Potri.003G204300.3 | 6.1195  | 26.0576  | -2.0902 | Down | 6.18E-21  | 2.84E-20  |
| Unigene21752  | Potri.002G182000.2 | 6.9318  | 29.5166  | -2.0902 | Down | 5.42E-50  | 5.29E-49  |
| Unigene44722  | Potri.013G046300.3 | 9.9816  | 42.5058  | -2.0903 | Down | 4.53E-89  | 8.38E-88  |
| Unigene115721 | Potri.005G087600.3 | 2.6373  | 11.2302  | -2.0903 | Down | 3.61E-11  | 1.10E-10  |
| Unigene21713  | Potri.001G024100.1 | 30.2302 | 128.7311 | -2.0903 | Down | 0         | 0         |
| Unigene49795  | Potri.007G130900.1 | 10.1293 | 43.1381  | -2.0904 | Down | 8.53E-41  | 6.81E-40  |
| Unigene43004  | Potri.001G358300.1 | 43.7273 | 186.2167 | -2.0904 | Down | 0         | 0         |
| Unigene26940  | Potri.016G069100.1 | 9.1538  | 38.987   | -2.0906 | Down | 6.20E-51  | 6.17E-50  |
| Unigene9705   | Potri.001G233800.7 | 16.2199 | 69.0832  | -2.0906 | Down | 7.16E-120 | 1.93E-118 |
| Unigene36206  | Potri.014G131600.2 | 9.7158  | 41.3884  | -2.0908 | Down | 9.74E-42  | 7.96E-41  |
| Unigene13477  | Potri.019G133500.1 | 5.6333  | 24.0008  | -2.091  | Down | 1.79E-62  | 2.22E-61  |
| Unigene107181 | Potri.014G105800.1 | 1.2433  | 5.2971   | -2.091  | Down | 1.20E-11  | 3.75E-11  |
| Unigene10033  | Potri.014G070600.1 | 14.4216 | 61.4431  | -2.091  | Down | 6.12E-103 | 1.36E-101 |
| Unigene22859  | Potri.007G001500.3 | 1.7167  | 7.314    | -2.091  | Down | 1.20E-11  | 3.75E-11  |
| Unigene39257  | Potri.011G112700.2 | 18.0236 | 76.7919  | -2.0911 | Down | 6.10E-154 | 2.26E-152 |
| Unigene34990  | Potri.001G222500.2 | 6.722   | 28.6415  | -2.0911 | Down | 6.06E-63  | 7.58E-62  |
| Unigene10743  | Potri.001G092000.1 | 8.3149  | 35.4394  | -2.0916 | Down | 1.57E-148 | 5.56E-147 |
| Unigene10162  | Potri.018G128000.3 | 2.8128  | 11.9897  | -2.0917 | Down | 7.89E-23  | 3.85E-22  |
| Unigene29034  | Potri.016G025500.3 | 7.5537  | 32.1987  | -2.0917 | Down | 6.93E-76  | 1.07E-74  |
| Unigene31499  | Potri.010G189700.1 | 2.8692  | 12.2303  | -2.0917 | Down | 4.00E-12  | 1.28E-11  |
| Unigene14410  | Potri.009G087700.1 | 1.0105  | 4.3072   | -2.0917 | Down | 4.00E-12  | 1.28E-11  |
| Unigene32482  | Potri.006G015200.1 | 4.9589  | 21.1379  | -2.0917 | Down | 4.30E-44  | 3.70E-43  |
| Unigene17486  | Potri.005G081800.1 | 4.0088  | 17.0881  | -2.0917 | Down | 7.89E-23  | 3.85E-22  |

|               |                    |         |          |         |      |           |           |
|---------------|--------------------|---------|----------|---------|------|-----------|-----------|
| Unigene60140  | Potri.003G056500.1 | 2.2111  | 9.4249   | -2.0917 | Down | 4.00E-12  | 1.28E-11  |
| Unigene14657  | Potri.007G142000.1 | 3.1656  | 13.4939  | -2.0918 | Down | 4.00E-12  | 1.28E-11  |
| Unigene3414   | Potri.005G054200.1 | 3.4592  | 14.7454  | -2.0918 | Down | 4.00E-12  | 1.28E-11  |
| Unigene34413  | Potri.008G108300.1 | 2.5365  | 10.813   | -2.0919 | Down | 9.15E-66  | 1.20E-64  |
| Unigene12269  | Potri.005G097400.3 | 6.2103  | 26.4774  | -2.092  | Down | 2.70E-77  | 4.25E-76  |
| Unigene18240  | Potri.016G077300.1 | 4.2285  | 18.0306  | -2.0922 | Down | 1.66E-45  | 1.48E-44  |
| Unigene9878   | Potri.010G036900.1 | 39.192  | 167.1205 | -2.0923 | Down | 3.56E-297 | 3.11E-295 |
| Unigene26639  | Potri.008G064200.1 | 2.86    | 12.1968  | -2.0924 | Down | 1.33E-12  | 4.35E-12  |
| Unigene17879  | Potri.004G116800.1 | 4.6144  | 19.6783  | -2.0924 | Down | 8.93E-24  | 4.49E-23  |
| Unigene63909  | Potri.004G001600.1 | 3.5383  | 15.0893  | -2.0924 | Down | 1.33E-12  | 4.35E-12  |
| Unigene90891  | Potri.016G006500.1 | 11.3398 | 48.3636  | -2.0925 | Down | 1.61E-57  | 1.82E-56  |
| Unigene26683  | Potri.001G017000.1 | 19.2429 | 82.0744  | -2.0926 | Down | 4.68E-69  | 6.49E-68  |
| Unigene48662  | Potri.007G070700.1 | 12.4145 | 52.9549  | -2.0927 | Down | 1.25E-103 | 2.79E-102 |
| Unigene31593  | Potri.019G087600.1 | 2.5202  | 10.7523  | -2.093  | Down | 1.01E-24  | 5.25E-24  |
| Unigene33058  | Potri.013G110700.1 | 8.8621  | 37.8089  | -2.093  | Down | 1.66E-105 | 3.77E-104 |
| Unigene52827  | Potri.012G024800.3 | 2.5478  | 10.8698  | -2.093  | Down | 4.43E-13  | 1.48E-12  |
| Unigene113892 | Potri.010G159700.1 | 3.5728  | 15.2427  | -2.093  | Down | 4.43E-13  | 1.48E-12  |
| Unigene21493  | Potri.009G125300.2 | 12.2566 | 52.2897  | -2.093  | Down | 4.27E-151 | 1.54E-149 |
| Unigene22459  | Potri.018G086000.2 | 23.7852 | 101.4822 | -2.0931 | Down | 5.15E-164 | 2.08E-162 |
| Unigene35578  | Potri.004G124000.2 | 7.0285  | 29.989   | -2.0931 | Down | 2.49E-48  | 2.35E-47  |
| Unigene404    | Potri.002G197800.1 | 38.1791 | 162.8944 | -2.0931 | Down | 0         | 0         |
| Unigene18334  | Potri.006G067100.1 | 3.9052  | 16.6638  | -2.0932 | Down | 2.42E-60  | 2.89E-59  |
| Unigene42614  | Potri.001G115100.1 | 3.0115  | 12.8501  | -2.0932 | Down | 2.42E-60  | 2.89E-59  |
| Unigene16626  | Potri.004G153900.4 | 8.1995  | 34.9888  | -2.0933 | Down | 3.40E-25  | 1.79E-24  |
| Unigene11432  | Potri.013G051200.1 | 4.6795  | 19.9702  | -2.0934 | Down | 2.85E-49  | 2.74E-48  |
| Unigene68512  | Potri.017G118400.1 | 14.4049 | 61.4774  | -2.0935 | Down | 2.83E-97  | 5.84E-96  |
| Unigene39071  | Potri.003G034300.1 | 5.3681  | 22.9097  | -2.0935 | Down | 2.76E-73  | 4.08E-72  |
| Unigene20768  | Potri.016G062100.1 | 3.4147  | 14.5742  | -2.0936 | Down | 1.48E-13  | 5.06E-13  |
| Unigene13733  | Potri.015G009500.1 | 2.6845  | 11.4577  | -2.0936 | Down | 9.64E-50  | 9.36E-49  |
| Unigene10912  | Potri.003G009700.2 | 16.2762 | 69.467   | -2.0936 | Down | 1.10E-145 | 3.79E-144 |
| Unigene53652  | Potri.002G216200.2 | 4.1268  | 17.6131  | -2.0936 | Down | 1.48E-13  | 5.06E-13  |
| Unigene11601  | Potri.003G135000.1 | 4.4714  | 19.0864  | -2.0937 | Down | 1.07E-74  | 1.62E-73  |
| Unigene22932  | Potri.001G182700.5 | 3.709   | 15.8328  | -2.0938 | Down | 3.86E-26  | 2.09E-25  |
| Unigene10691  | Potri.001G094500.1 | 11.8203 | 50.4579  | -2.0938 | Down | 2.50E-209 | 1.37E-207 |
| Unigene78759  | Potri.005G045600.6 | 12.5377 | 53.524   | -2.0939 | Down | 1.17E-38  | 8.85E-38  |
| Unigene44663  | Potri.001G139400.1 | 21.2007 | 90.5083  | -2.0939 | Down | 2.45E-174 | 1.07E-172 |
| Unigene35704  | Potri.009G115600.1 | 1.4788  | 6.314    | -2.0941 | Down | 4.93E-14  | 1.72E-13  |
| Unigene37718  | Potri.009G055400.1 | 8.9919  | 38.3912  | -2.0941 | Down | 3.94E-39  | 3.02E-38  |
| Unigene83915  | Potri.002G096900.1 | 55.5409 | 237.1514 | -2.0942 | Down | 4.56E-190 | 2.24E-188 |

|              |                     |         |          |         |      |           |           |
|--------------|---------------------|---------|----------|---------|------|-----------|-----------|
| Unigene13297 | Potri.008G195900.4  | 6.2259  | 26.5887  | -2.0945 | Down | 4.90E-53  | 5.09E-52  |
| Unigene1857  | Potri.008G093300.1  | 1.3617  | 5.8156   | -2.0945 | Down | 1.65E-14  | 5.87E-14  |
| Unigene20869 | Potri.016G003900.1  | 1.8954  | 8.0954   | -2.0946 | Down | 1.65E-14  | 5.87E-14  |
| Unigene43058 | Potri.012G017700.1  | 5.0847  | 21.7164  | -2.0946 | Down | 1.87E-66  | 2.48E-65  |
| Unigene6400  | Potri.010G054000.1  | 2.0722  | 8.8503   | -2.0946 | Down | 1.65E-14  | 5.87E-14  |
| Unigene35396 | Potri.001G098600.3  | 11.7568 | 50.2154  | -2.0946 | Down | 8.47E-93  | 1.65E-91  |
| Unigene39150 | Potri.015G066600.3  | 6.2288  | 26.6059  | -2.0947 | Down | 5.13E-41  | 4.13E-40  |
| Unigene42103 | Potri.006G027300.1  | 22.5656 | 96.3873  | -2.0947 | Down | 2.46E-80  | 4.06E-79  |
| Unigene26104 | Potri.015G096300.1  | 7.9331  | 33.8875  | -2.0948 | Down | 4.97E-28  | 2.85E-27  |
| Unigene84581 | Potri.010G089500.1  | 7.5931  | 32.4352  | -2.0948 | Down | 4.97E-28  | 2.85E-27  |
| Unigene42796 | Potri.015G088700.1  | 13.0655 | 55.816   | -2.0949 | Down | 1.27E-227 | 7.72E-226 |
| Unigene19276 | Potri.010G177900.1  | 14.8939 | 63.6266  | -2.0949 | Down | 6.42E-55  | 6.92E-54  |
| Unigene72082 | Potri.004G203400.1  | 5.2765  | 22.5429  | -2.095  | Down | 5.50E-15  | 2.01E-14  |
| Unigene82290 | Potri.001G253300.12 | 4.1603  | 17.7742  | -2.095  | Down | 5.50E-15  | 2.01E-14  |
| Unigene11721 | Potri.014G158700.1  | 11.2523 | 48.0759  | -2.0951 | Down | 6.78E-285 | 5.59E-283 |
| Unigene4723  | Potri.018G109500.1  | 3.8989  | 16.6622  | -2.0954 | Down | 1.84E-15  | 6.84E-15  |
| Unigene96647 | Potri.011G054300.1  | 1.1201  | 4.7868   | -2.0954 | Down | 1.84E-15  | 6.84E-15  |
| Unigene5817  | Potri.001G068000.3  | 61.4346 | 262.5433 | -2.0954 | Down | 6.45E-196 | 3.28E-194 |
| Unigene67554 | Potri.010G004400.1  | 3.7237  | 15.9136  | -2.0955 | Down | 1.90E-29  | 1.14E-28  |
| Unigene8552  | Potri.003G124800.2  | 5.8641  | 25.064   | -2.0956 | Down | 6.42E-30  | 3.89E-29  |
| Unigene38617 | Potri.012G034300.1  | 9.4519  | 40.4042  | -2.0958 | Down | 8.76E-45  | 7.64E-44  |
| Unigene49538 | Potri.006G087200.1  | 11.3361 | 48.4586  | -2.0958 | Down | 8.76E-45  | 7.64E-44  |
| Unigene45152 | Potri.009G061000.3  | 5.6407  | 24.1175  | -2.0961 | Down | 3.36E-90  | 6.30E-89  |
| Unigene31952 | Potri.T038900.2     | 3.249   | 13.8919  | -2.0962 | Down | 2.78E-120 | 7.52E-119 |
| Unigene11213 | Potri.002G143300.1  | 18.8114 | 80.4401  | -2.0963 | Down | 1.72E-136 | 5.46E-135 |
| Unigene14894 | Potri.005G080100.2  | 5.4224  | 23.1906  | -2.0965 | Down | 6.90E-17  | 2.72E-16  |
| Unigene75485 | Potri.004G003900.1  | 5.5696  | 23.8202  | -2.0965 | Down | 6.90E-17  | 2.72E-16  |
| Unigene42731 | Potri.013G038000.3  | 1.4812  | 6.3349   | -2.0966 | Down | 6.90E-17  | 2.72E-16  |
| Unigene37521 | Potri.006G044400.1  | 5.6159  | 24.0208  | -2.0967 | Down | 9.46E-33  | 6.20E-32  |
| Unigene85120 | Potri.005G228600.1  | 61.2498 | 261.9793 | -2.0967 | Down | 1.97E-218 | 1.14E-216 |
| Unigene91045 | Potri.013G130800.3  | 50.0721 | 214.1881 | -2.0968 | Down | 3.14E-252 | 2.18E-250 |
| Unigene11126 | Potri.010G101200.1  | 1.3785  | 5.8967   | -2.0968 | Down | 2.31E-17  | 9.30E-17  |
| Unigene13649 | Potri.001G091100.1  | 3.78    | 16.1699  | -2.0969 | Down | 3.19E-33  | 2.12E-32  |
| Unigene38040 | Potri.005G151500.3  | 3.7408  | 16.004   | -2.097  | Down | 1.08E-33  | 7.22E-33  |
| Unigene13203 | Potri.011G022600.1  | 5.669   | 24.2557  | -2.0972 | Down | 2.45E-115 | 6.28E-114 |
| Unigene44034 | Potri.006G265100.1  | 2.3866  | 10.2116  | -2.0972 | Down | 7.74E-18  | 3.18E-17  |
| Unigene2597  | Potri.017G101100.2  | 7.0827  | 30.3064  | -2.0973 | Down | 2.30E-165 | 9.42E-164 |
| Unigene14983 | Potri.010G230600.1  | 11.2692 | 48.2222  | -2.0973 | Down | 1.23E-34  | 8.42E-34  |
| Unigene14702 | Potri.001G273900.1  | 24.3012 | 103.9944 | -2.0974 | Down | 1.79E-101 | 3.91E-100 |

|               |                    |          |          |         |      |           |           |
|---------------|--------------------|----------|----------|---------|------|-----------|-----------|
| Unigene107186 | Potri.009G074100.1 | 1.7461   | 7.4727   | -2.0975 | Down | 2.60E-18  | 1.09E-17  |
| Unigene102409 | Potri.006G165100.3 | 1.3216   | 5.656    | -2.0975 | Down | 2.60E-18  | 1.09E-17  |
| Unigene87365  | Potri.016G063200.1 | 116.2799 | 497.6587 | -2.0976 | Down | 0         | 0         |
| Unigene4365   | Potri.013G019000.1 | 11.7365  | 50.2315  | -2.0976 | Down | 1.40E-35  | 9.84E-35  |
| Unigene45406  | Potri.001G399600.9 | 3.9873   | 17.066   | -2.0976 | Down | 8.71E-53  | 9.00E-52  |
| Unigene63256  | Potri.018G018400.1 | 4.3213   | 18.4999  | -2.098  | Down | 2.92E-19  | 1.27E-18  |
| Unigene88379  | Potri.006G057400.3 | 4.2692   | 18.277   | -2.098  | Down | 2.92E-19  | 1.27E-18  |
| Unigene39639  | Potri.018G058600.3 | 5.4071   | 23.1534  | -2.0983 | Down | 1.50E-56  | 1.67E-55  |
| Unigene49959  | Potri.007G127800.2 | 4.7893   | 20.508   | -2.0983 | Down | 1.50E-56  | 1.67E-55  |
| Unigene52416  | Potri.017G085600.1 | 3.0449   | 13.0397  | -2.0984 | Down | 3.29E-20  | 1.48E-19  |
| Unigene18500  | Potri.004G045400.1 | 3.4577   | 14.8075  | -2.0984 | Down | 7.01E-39  | 5.35E-38  |
| Unigene18235  | Potri.017G001600.1 | 15.3079  | 65.5623  | -2.0986 | Down | 1.21E-133 | 3.73E-132 |
| Unigene10755  | Potri.007G015400.2 | 11.9988  | 51.3904  | -2.0986 | Down | 2.97E-228 | 1.81E-226 |
| Unigene23964  | Potri.015G117300.9 | 4.691    | 20.0926  | -2.0987 | Down | 6.67E-59  | 7.77E-58  |
| Unigene35756  | Potri.014G114100.1 | 14.993   | 64.2175  | -2.0987 | Down | 8.00E-40  | 6.25E-39  |
| Unigene79898  | Potri.008G150000.1 | 12.4839  | 53.4709  | -2.0987 | Down | 8.00E-40  | 6.25E-39  |
| Unigene21513  | Potri.008G073500.1 | 3.3594   | 14.3895  | -2.0987 | Down | 2.00E-78  | 3.20E-77  |
| Unigene7028   | Potri.005G003800.1 | 3.4678   | 14.853   | -2.0987 | Down | 1.11E-20  | 5.04E-20  |
| Unigene78924  | Potri.012G036300.1 | 13.1095  | 56.1584  | -2.0989 | Down | 9.14E-41  | 7.30E-40  |
| Unigene1280   | Potri.010G186200.1 | 2.038    | 8.7315   | -2.0991 | Down | 1.25E-21  | 5.86E-21  |
| Unigene109933 | Potri.004G172000.1 | 22.3116  | 95.6004  | -2.0992 | Down | 1.15E-62  | 1.43E-61  |
| Unigene17143  | Potri.014G099100.2 | 2.2878   | 9.804    | -2.0994 | Down | 4.03E-43  | 3.40E-42  |
| Unigene88241  | Potri.001G320500.3 | 65.5293  | 280.8079 | -2.0994 | Down | 3.05E-270 | 2.34E-268 |
| Unigene52718  | Potri.007G051000.1 | 4.2601   | 18.2567  | -2.0995 | Down | 1.41E-22  | 6.82E-22  |
| Unigene94749  | Potri.019G085100.1 | 2.2756   | 9.7532   | -2.0996 | Down | 4.74E-23  | 2.33E-22  |
| Unigene2662   | Potri.018G097100.1 | 3.1421   | 13.4679  | -2.0997 | Down | 5.27E-45  | 4.62E-44  |
| Unigene13561  | Potri.008G152600.1 | 7.0299   | 30.1307  | -2.0997 | Down | 4.98E-216 | 2.82E-214 |
| Unigene292    | Potri.006G105800.1 | 4.1395   | 17.7441  | -2.0998 | Down | 3.12E-89  | 5.79E-88  |
| Unigene18939  | Potri.001G457300.1 | 1.7922   | 7.6831   | -2.1    | Down | 5.37E-24  | 2.72E-23  |
| Unigene18717  | Potri.019G054200.3 | 17.4065  | 74.6429  | -2.1004 | Down | 2.81E-96  | 5.72E-95  |
| Unigene16364  | Potri.016G081300.1 | 15.9417  | 68.3699  | -2.1006 | Down | 2.04E-74  | 3.07E-73  |
| Unigene76307  | Potri.014G049300.2 | 34.4814  | 147.8816 | -2.1006 | Down | 1.26E-98  | 2.66E-97  |
| Unigene29836  | Potri.014G011700.1 | 9.8352   | 42.1845  | -2.1007 | Down | 4.00E-51  | 3.99E-50  |
| Unigene38509  | Potri.005G234500.1 | 2.0941   | 8.9821   | -2.1007 | Down | 2.32E-26  | 1.27E-25  |
| Unigene43108  | Potri.001G204900.1 | 7.1008   | 30.4565  | -2.1007 | Down | 3.62E-125 | 1.03E-123 |
| Unigene28926  | Potri.015G012800.5 | 3.8938   | 16.7033  | -2.1009 | Down | 3.54E-78  | 5.66E-77  |
| Unigene46515  | Potri.009G013600.1 | 25.2774  | 108.4336 | -2.1009 | Down | 3.54E-78  | 5.66E-77  |
| Unigene61969  | Potri.002G221600.1 | 4.9793   | 21.3606  | -2.1009 | Down | 2.63E-27  | 1.48E-26  |
| Unigene36402  | Potri.017G088300.1 | 23.6325  | 101.3833 | -2.101  | Down | 4.07E-79  | 6.60E-78  |

|               |                    |         |          |         |      |           |           |
|---------------|--------------------|---------|----------|---------|------|-----------|-----------|
| Unigene12055  | Potri.005G118800.1 | 20.0429 | 85.9867  | -2.101  | Down | 1.14E-105 | 2.60E-104 |
| Unigene14451  | Potri.004G168500.4 | 18.3197 | 78.5923  | -2.101  | Down | 1.77E-53  | 1.86E-52  |
| Unigene21962  | Potri.010G062000.3 | 3.7233  | 15.9738  | -2.1011 | Down | 8.87E-28  | 5.05E-27  |
| Unigene48848  | Potri.006G085400.2 | 8.7107  | 37.3779  | -2.1013 | Down | 2.67E-56  | 2.96E-55  |
| Unigene21329  | Potri.007G096100.3 | 13.8171 | 59.2938  | -2.1014 | Down | 1.40E-195 | 7.07E-194 |
| Unigene10764  | Potri.015G052400.1 | 7.753   | 33.2731  | -2.1015 | Down | 1.20E-255 | 8.54E-254 |
| Unigene33204  | Potri.011G131700.2 | 1.4309  | 6.1408   | -2.1015 | Down | 1.14E-29  | 6.88E-29  |
| Unigene963    | Potri.006G129300.1 | 7.8802  | 33.8178  | -2.1015 | Down | 1.35E-141 | 4.49E-140 |
| Unigene41382  | Potri.002G137600.1 | 6.3041  | 27.0543  | -2.1015 | Down | 1.14E-29  | 6.88E-29  |
| Unigene23638  | Potri.013G016900.5 | 9.6383  | 41.3671  | -2.1016 | Down | 4.01E-59  | 4.70E-58  |
| Unigene74421  | Potri.015G035800.1 | 55.6891 | 239.0552 | -2.1019 | Down | 1.89E-151 | 6.87E-150 |
| Unigene32561  | Potri.018G090300.1 | 4.3449  | 18.6523  | -2.102  | Down | 2.05E-62  | 2.54E-61  |
| Unigene12663  | Potri.014G001000.3 | 4.1047  | 17.6251  | -2.1023 | Down | 6.47E-34  | 4.36E-33  |
| Unigene31455  | Potri.010G131400.3 | 20.136  | 86.4653  | -2.1023 | Down | 8.72E-100 | 1.87E-98  |
| Unigene11934  | Potri.010G064100.1 | 13.9538 | 59.9164  | -2.1023 | Down | 7.59E-99  | 1.61E-97  |
| Unigene24047  | Potri.009G158400.1 | 3.0753  | 13.2057  | -2.1024 | Down | 2.19E-34  | 1.49E-33  |
| Unigene70656  | Potri.003G108900.1 | 13.2413 | 56.8621  | -2.1024 | Down | 7.38E-35  | 5.09E-34  |
| Unigene112891 | Potri.003G132600.1 | 32.3363 | 138.8658 | -2.1025 | Down | 3.91E-102 | 8.60E-101 |
| Unigene91973  | Potri.005G258400.1 | 74.1828 | 318.6113 | -2.1026 | Down | 0         | 0         |
| Unigene87196  | Potri.008G138100.1 | 35.7454 | 153.5281 | -2.1027 | Down | 2.40E-141 | 7.94E-140 |
| Unigene23915  | Potri.005G257000.2 | 12.3251 | 52.9396  | -2.1027 | Down | 9.30E-73  | 1.36E-71  |
| Unigene511    | Potri.016G043100.1 | 5.1498  | 22.1301  | -2.1034 | Down | 1.66E-84  | 2.90E-83  |
| Unigene24319  | Potri.014G100600.1 | 2.749   | 11.8132  | -2.1034 | Down | 7.17E-43  | 6.00E-42  |
| Unigene38463  | Potri.011G147400.2 | 7.8069  | 33.55    | -2.1035 | Down | 8.19E-44  | 7.00E-43  |
| Unigene1553   | Potri.006G114700.1 | 30.7845 | 132.2951 | -2.1035 | Down | 0         | 0         |
| Unigene31009  | Potri.010G060500.1 | 15.9732 | 68.6497  | -2.1036 | Down | 2.90E-88  | 5.31E-87  |
| Unigene195    | Potri.005G127000.2 | 13.099  | 56.2993  | -2.1037 | Down | 1.38E-133 | 4.25E-132 |
| Unigene28794  | Potri.009G155500.3 | 6.0402  | 25.9627  | -2.1038 | Down | 4.14E-47  | 3.81E-46  |
| Unigene45115  | Potri.016G060500.1 | 7.1125  | 30.5848  | -2.1044 | Down | 1.46E-164 | 5.96E-163 |
| Unigene2114   | Potri.001G204900.1 | 16.4681 | 70.8169  | -2.1044 | Down | 2.82E-111 | 6.92E-110 |
| Unigene21500  | Potri.017G052300.1 | 11.9421 | 51.3628  | -2.1047 | Down | 4.81E-180 | 2.19E-178 |
| Unigene26292  | Potri.017G032000.3 | 19.8834 | 85.5304  | -2.1049 | Down | 6.29E-66  | 8.31E-65  |
| Unigene42875  | Potri.009G152500.1 | 7.162   | 30.8105  | -2.105  | Down | 4.30E-202 | 2.26E-200 |
| Unigene18632  | Potri.018G152500.1 | 3.7373  | 16.0793  | -2.1051 | Down | 1.89E-73  | 2.81E-72  |
| Unigene43594  | Potri.016G134600.1 | 11.4212 | 49.1412  | -2.1052 | Down | 1.14E-223 | 6.74E-222 |
| Unigene45508  | Potri.018G049500.1 | 7.7863  | 33.5044  | -2.1053 | Down | 4.99E-80  | 8.19E-79  |
| Unigene87973  | Potri.016G000600.1 | 39.7097 | 170.8799 | -2.1054 | Down | 7.65E-164 | 3.09E-162 |
| Unigene10718  | Potri.015G108600.5 | 13.5167 | 58.1801  | -2.1058 | Down | 1.46E-198 | 7.56E-197 |
| Unigene84553  | Potri.007G079900.2 | 27.4418 | 118.1158 | -2.1058 | Down | 2.39E-98  | 5.01E-97  |



|               |                    |         |          |         |      |           |           |
|---------------|--------------------|---------|----------|---------|------|-----------|-----------|
| Unigene22463  | Potri.012G007000.3 | 36.4527 | 156.9178 | -2.1059 | Down | 0         | 0         |
| Unigene22837  | Potri.010G129800.5 | 16.7013 | 71.8985  | -2.106  | Down | 2.59E-114 | 6.55E-113 |
| Unigene1151   | Potri.011G050800.1 | 8.0739  | 34.761   | -2.1061 | Down | 4.12E-125 | 1.17E-123 |
| Unigene15993  | Potri.019G075700.3 | 0.8608  | 3.7094   | -2.1074 | Down | 4.15E-04  | 7.42E-04  |
| Unigene8699   | Potri.016G047800.1 | 0.8608  | 3.7094   | -2.1074 | Down | 4.15E-04  | 7.42E-04  |
| Unigene6406   | Potri.013G149800.1 | 1.2068  | 5.2004   | -2.1074 | Down | 7.19E-12  | 2.27E-11  |
| Unigene115539 | Potri.010G129900.1 | 0.7691  | 3.3142   | -2.1074 | Down | 4.15E-04  | 7.42E-04  |
| Unigene106170 | Potri.010G096700.1 | 0.7853  | 3.384    | -2.1074 | Down | 6.51E-11  | 1.96E-10  |
| Unigene17650  | Potri.008G109900.1 | 0.7346  | 3.1656   | -2.1074 | Down | 1.36E-05  | 2.84E-05  |
| Unigene110608 | Potri.007G130400.1 | 0.9947  | 4.2864   | -2.1074 | Down | 4.15E-04  | 7.42E-04  |
| Unigene10325  | Potri.004G141700.4 | 0.9061  | 3.9046   | -2.1074 | Down | 4.66E-07  | 1.10E-06  |
| Unigene5522   | Potri.003G006900.3 | 0.8575  | 3.6952   | -2.1074 | Down | 4.15E-04  | 7.42E-04  |
| Unigene116244 | Potri.T109200.1    | 0.715   | 3.0813   | -2.1075 | Down | 4.15E-04  | 7.42E-04  |
| Unigene44537  | Potri.019G119500.1 | 1.9552  | 8.4259   | -2.1075 | Down | 8.85E-14  | 3.06E-13  |
| Unigene16240  | Potri.019G108900.1 | 1.1134  | 4.7982   | -2.1075 | Down | 4.15E-04  | 7.42E-04  |
| Unigene79731  | Potri.018G128300.3 | 0.9172  | 3.9526   | -2.1075 | Down | 4.15E-04  | 7.42E-04  |
| Unigene101053 | Potri.018G091500.2 | 1.1303  | 4.8709   | -2.1075 | Down | 1.53E-07  | 3.73E-07  |
| Unigene116414 | Potri.018G063500.1 | 1.1729  | 5.0547   | -2.1075 | Down | 4.39E-06  | 9.57E-06  |
| Unigene109234 | Potri.018G044700.1 | 1.0507  | 4.5279   | -2.1075 | Down | 4.15E-04  | 7.42E-04  |
| Unigene52256  | Potri.018G000600.3 | 1.2981  | 5.5942   | -2.1075 | Down | 1.65E-08  | 4.30E-08  |
| Unigene101786 | Potri.017G023200.1 | 0.7285  | 3.1395   | -2.1075 | Down | 4.39E-06  | 9.57E-06  |
| Unigene10811  | Potri.016G090300.1 | 3.7136  | 16.0036  | -2.1075 | Down | 2.37E-140 | 7.77E-139 |
| Unigene96075  | Potri.016G067600.1 | 0.9286  | 4.0018   | -2.1075 | Down | 4.15E-04  | 7.42E-04  |
| Unigene109940 | Potri.016G063300.1 | 1.0219  | 4.4039   | -2.1075 | Down | 4.15E-04  | 7.42E-04  |
| Unigene49782  | Potri.016G051900.2 | 15.3516 | 66.157   | -2.1075 | Down | 6.45E-62  | 7.93E-61  |
| Unigene14389  | Potri.016G042100.1 | 2.3522  | 10.1368  | -2.1075 | Down | 2.16E-11  | 6.66E-11  |
| Unigene29053  | Potri.016G006500.1 | 10.4608 | 45.0803  | -2.1075 | Down | 2.85E-48  | 2.68E-47  |
| Unigene101099 | Potri.015G123700.3 | 1.6296  | 7.0227   | -2.1075 | Down | 1.36E-05  | 2.84E-05  |
| Unigene79896  | Potri.015G108500.1 | 28.7739 | 124.0001 | -2.1075 | Down | 1.39E-90  | 2.62E-89  |
| Unigene15344  | Potri.015G067300.2 | 1.3134  | 5.6599   | -2.1075 | Down | 2.65E-13  | 8.98E-13  |
| Unigene51166  | Potri.015G063400.1 | 1.1936  | 5.1437   | -2.1075 | Down | 4.21E-05  | 8.39E-05  |
| Unigene7685   | Potri.015G019100.1 | 3.5575  | 15.3308  | -2.1075 | Down | 1.01E-32  | 6.63E-32  |
| Unigene49791  | Potri.015G017700.1 | 5.6898  | 24.5198  | -2.1075 | Down | 4.92E-44  | 4.23E-43  |
| Unigene69029  | Potri.014G146200.1 | 2.4696  | 10.6427  | -2.1075 | Down | 6.05E-29  | 3.56E-28  |
| Unigene98923  | Potri.014G120900.1 | 2.48    | 10.6876  | -2.1075 | Down | 2.65E-13  | 8.98E-13  |
| Unigene96705  | Potri.014G071900.3 | 0.943   | 4.0637   | -2.1075 | Down | 1.36E-05  | 2.84E-05  |
| Unigene114327 | Potri.014G059600.1 | 0.8351  | 3.5987   | -2.1075 | Down | 4.15E-04  | 7.42E-04  |
| Unigene16554  | Potri.014G009900.1 | 3.5865  | 15.4558  | -2.1075 | Down | 2.65E-13  | 8.98E-13  |
| Unigene115122 | Potri.013G152000.1 | 0.7908  | 3.4079   | -2.1075 | Down | 4.15E-04  | 7.42E-04  |

|               |                    |         |         |         |      |           |           |
|---------------|--------------------|---------|---------|---------|------|-----------|-----------|
| Unigene4124   | Potri.013G110800.1 | 0.9688  | 4.1751  | -2.1075 | Down | 4.15E-04  | 7.42E-04  |
| Unigene3822   | Potri.013G093000.1 | 0.7598  | 3.2744  | -2.1075 | Down | 1.43E-06  | 3.25E-06  |
| Unigene12264  | Potri.013G047600.1 | 15.1421 | 65.2542 | -2.1075 | Down | 3.32E-104 | 7.47E-103 |
| Unigene72604  | Potri.013G042700.1 | 1.6217  | 6.9887  | -2.1075 | Down | 1.36E-05  | 2.84E-05  |
| Unigene4200   | Potri.013G020500.1 | 1.711   | 7.3734  | -2.1075 | Down | 4.39E-06  | 9.57E-06  |
| Unigene17887  | Potri.013G019000.1 | 6.2004  | 26.7206 | -2.1075 | Down | 8.89E-32  | 5.67E-31  |
| Unigene14531  | Potri.013G010900.2 | 6.3409  | 27.3259 | -2.1075 | Down | 1.39E-17  | 5.63E-17  |
| Unigene49058  | Potri.013G003100.1 | 2.7915  | 12.0296 | -2.1075 | Down | 6.05E-29  | 3.56E-28  |
| Unigene95747  | Potri.012G143900.2 | 1.4113  | 6.0821  | -2.1075 | Down | 2.16E-11  | 6.66E-11  |
| Unigene11355  | Potri.012G092400.1 | 1.2657  | 5.4543  | -2.1075 | Down | 1.79E-09  | 4.96E-09  |
| Unigene77466  | Potri.012G025400.1 | 0.9688  | 4.1751  | -2.1075 | Down | 4.15E-04  | 7.42E-04  |
| Unigene104888 | Potri.011G152600.2 | 1.6448  | 7.0881  | -2.1075 | Down | 3.69E-16  | 1.41E-15  |
| Unigene19344  | Potri.011G146900.2 | 1.4627  | 6.3036  | -2.1075 | Down | 5.43E-09  | 1.46E-08  |
| Unigene82782  | Potri.011G127000.3 | 9.4662  | 40.7941 | -2.1075 | Down | 3.41E-33  | 2.26E-32  |
| Unigene47455  | Potri.011G094800.1 | 1.1052  | 4.7627  | -2.1075 | Down | 6.51E-11  | 1.96E-10  |
| Unigene50887  | Potri.010G148700.1 | 1.2862  | 5.5428  | -2.1075 | Down | 1.43E-06  | 3.25E-06  |
| Unigene111467 | Potri.010G121600.2 | 1.1206  | 4.8291  | -2.1075 | Down | 1.32E-04  | 2.50E-04  |
| Unigene16323  | Potri.010G120500.1 | 20.3452 | 87.6768 | -2.1075 | Down | 6.71E-78  | 1.07E-76  |
| Unigene52250  | Potri.010G111700.1 | 5.5048  | 23.7226 | -2.1075 | Down | 6.05E-29  | 3.56E-28  |
| Unigene35522  | Potri.010G048700.1 | 1.0239  | 4.4125  | -2.1075 | Down | 1.32E-04  | 2.50E-04  |
| Unigene101935 | Potri.010G022500.1 | 1.0834  | 4.6688  | -2.1075 | Down | 1.32E-04  | 2.50E-04  |
| Unigene40412  | Potri.009G151400.8 | 0.9595  | 4.1348  | -2.1075 | Down | 4.21E-05  | 8.39E-05  |
| Unigene106107 | Potri.009G047800.1 | 0.7655  | 3.2988  | -2.1075 | Down | 1.43E-06  | 3.25E-06  |
| Unigene29826  | Potri.009G012900.6 | 5.7003  | 24.565  | -2.1075 | Down | 2.85E-23  | 1.41E-22  |
| Unigene31185  | Potri.008G214300.3 | 1.3369  | 5.7613  | -2.1075 | Down | 6.51E-11  | 1.96E-10  |
| Unigene27547  | Potri.008G213900.1 | 7.1138  | 30.6568 | -2.1075 | Down | 1.71E-36  | 1.23E-35  |
| Unigene101693 | Potri.008G202100.2 | 3.7187  | 16.0255 | -2.1075 | Down | 4.14E-17  | 1.65E-16  |
| Unigene28014  | Potri.008G202100.2 | 2.3201  | 9.9982  | -2.1075 | Down | 8.85E-14  | 3.06E-13  |
| Unigene48481  | Potri.008G130400.2 | 0.979   | 4.2189  | -2.1075 | Down | 4.39E-06  | 9.57E-06  |
| Unigene27335  | Potri.008G111800.1 | 1.4137  | 6.0922  | -2.1075 | Down | 1.53E-07  | 3.73E-07  |
| Unigene29595  | Potri.008G102100.1 | 1.9593  | 8.4436  | -2.1075 | Down | 2.96E-14  | 1.04E-13  |
| Unigene34040  | Potri.008G101300.1 | 2.8394  | 12.2363 | -2.1075 | Down | 2.52E-22  | 1.21E-21  |
| Unigene47146  | Potri.007G130800.1 | 1.4675  | 6.3242  | -2.1075 | Down | 4.66E-07  | 1.10E-06  |
| Unigene1315   | Potri.007G064300.2 | 3.7381  | 16.1091 | -2.1075 | Down | 5.63E-45  | 4.93E-44  |
| Unigene30804  | Potri.007G044100.1 | 12.2389 | 52.7431 | -2.1075 | Down | 4.27E-51  | 4.26E-50  |
| Unigene98749  | Potri.007G025700.1 | 1.6652  | 7.1759  | -2.1075 | Down | 4.39E-06  | 9.57E-06  |
| Unigene33987  | Potri.006G279200.1 | 3.7254  | 16.0545 | -2.1075 | Down | 2.89E-40  | 2.28E-39  |
| Unigene116254 | Potri.006G262200.1 | 1.5492  | 6.6761  | -2.1075 | Down | 1.53E-07  | 3.73E-07  |
| Unigene115889 | Potri.006G247500.1 | 1.3586  | 5.8548  | -2.1075 | Down | 1.43E-06  | 3.25E-06  |

|               |                    |         |         |         |      |          |          |
|---------------|--------------------|---------|---------|---------|------|----------|----------|
| Unigene40645  | Potri.006G230200.1 | 1.1584  | 4.992   | -2.1075 | Down | 4.39E-06 | 9.57E-06 |
| Unigene22607  | Potri.006G148100.1 | 1.8626  | 8.0268  | -2.1075 | Down | 5.88E-20 | 2.61E-19 |
| Unigene65687  | Potri.006G142100.1 | 0.7873  | 3.3929  | -2.1075 | Down | 4.21E-05 | 8.39E-05 |
| Unigene32348  | Potri.006G114300.4 | 2.7096  | 11.677  | -2.1075 | Down | 8.89E-32 | 5.67E-31 |
| Unigene26550  | Potri.006G065300.1 | 1.0419  | 4.49    | -2.1075 | Down | 4.39E-06 | 9.57E-06 |
| Unigene17849  | Potri.006G054800.1 | 1.7065  | 7.3542  | -2.1075 | Down | 2.16E-11 | 6.66E-11 |
| Unigene52381  | Potri.006G023400.2 | 17.7567 | 76.5217 | -2.1075 | Down | 3.45E-81 | 5.74E-80 |
| Unigene4285   | Potri.006G017000.1 | 1.8821  | 8.1108  | -2.1075 | Down | 1.43E-06 | 3.25E-06 |
| Unigene105615 | Potri.006G001400.1 | 0.8797  | 3.7911  | -2.1075 | Down | 4.39E-06 | 9.57E-06 |
| Unigene112534 | Potri.005G253600.5 | 1.3758  | 5.929   | -2.1075 | Down | 1.36E-05 | 2.84E-05 |
| Unigene53189  | Potri.005G237100.2 | 2.7292  | 11.7615 | -2.1075 | Down | 5.93E-10 | 1.69E-09 |
| Unigene96239  | Potri.005G218600.1 | 1.1254  | 4.8499  | -2.1075 | Down | 1.32E-04 | 2.50E-04 |
| Unigene8478   | Potri.005G215100.1 | 1.6153  | 6.9612  | -2.1075 | Down | 7.19E-12 | 2.27E-11 |
| Unigene100233 | Potri.005G201300.3 | 1.4699  | 6.3346  | -2.1075 | Down | 4.21E-05 | 8.39E-05 |
| Unigene2313   | Potri.005G181500.1 | 2.6175  | 11.2801 | -2.1075 | Down | 1.97E-20 | 8.92E-20 |
| Unigene15961  | Potri.005G111700.1 | 0.7386  | 3.183   | -2.1075 | Down | 4.15E-04 | 7.42E-04 |
| Unigene115743 | Potri.005G081500.2 | 1.2559  | 5.4121  | -2.1075 | Down | 4.39E-06 | 9.57E-06 |
| Unigene38755  | Potri.005G061000.1 | 1.2943  | 5.5778  | -2.1075 | Down | 1.43E-06 | 3.25E-06 |
| Unigene42730  | Potri.005G050900.1 | 2.7748  | 11.9578 | -2.1075 | Down | 4.13E-26 | 2.24E-25 |
| Unigene36018  | Potri.004G210100.5 | 7.3077  | 31.4921 | -2.1075 | Down | 3.22E-24 | 1.64E-23 |
| Unigene17987  | Potri.004G208400.2 | 4.2557  | 18.3396 | -2.1075 | Down | 1.23E-25 | 6.55E-25 |
| Unigene64158  | Potri.004G177700.1 | 4.2426  | 18.2833 | -2.1075 | Down | 7.96E-13 | 2.63E-12 |
| Unigene32756  | Potri.004G162800.1 | 6.7377  | 29.036  | -2.1075 | Down | 7.94E-87 | 1.43E-85 |
| Unigene43868  | Potri.004G100700.5 | 2.2586  | 9.7334  | -2.1075 | Down | 4.64E-18 | 1.92E-17 |
| Unigene104988 | Potri.004G073700.1 | 1.547   | 6.6667  | -2.1075 | Down | 5.93E-10 | 1.69E-09 |
| Unigene118080 | Potri.004G047300.1 | 0.7368  | 3.1751  | -2.1075 | Down | 4.21E-05 | 8.39E-05 |
| Unigene113476 | Potri.004G047000.1 | 1.3165  | 5.6732  | -2.1075 | Down | 1.36E-05 | 2.84E-05 |
| Unigene25709  | Potri.004G023800.1 | 1.6578  | 7.144   | -2.1075 | Down | 4.66E-07 | 1.10E-06 |
| Unigene3083   | Potri.003G186900.1 | 2.9918  | 12.8929 | -2.1075 | Down | 5.63E-45 | 4.93E-44 |
| Unigene46426  | Potri.003G140900.1 | 6.5762  | 28.34   | -2.1075 | Down | 8.89E-32 | 5.67E-31 |
| Unigene45070  | Potri.003G120200.1 | 2.3754  | 10.2367 | -2.1075 | Down | 3.30E-41 | 2.67E-40 |
| Unigene41487  | Potri.003G117500.1 | 0.905   | 3.9001  | -2.1075 | Down | 5.01E-08 | 1.27E-07 |
| Unigene25694  | Potri.003G115000.1 | 0.7657  | 3.2997  | -2.1075 | Down | 1.32E-04 | 2.50E-04 |
| Unigene2127   | Potri.003G111600.1 | 1.8689  | 8.0538  | -2.1075 | Down | 7.96E-13 | 2.63E-12 |
| Unigene42191  | Potri.003G110700.1 | 1.8465  | 7.9575  | -2.1075 | Down | 6.51E-11 | 1.96E-10 |
| Unigene117113 | Potri.003G091900.1 | 0.9702  | 4.1811  | -2.1075 | Down | 1.36E-05 | 2.84E-05 |
| Unigene28501  | Potri.003G086000.1 | 1.5279  | 6.5846  | -2.1075 | Down | 1.79E-09 | 4.96E-09 |
| Unigene13591  | Potri.003G045800.1 | 2.4546  | 10.5778 | -2.1075 | Down | 1.23E-25 | 6.55E-25 |
| Unigene16442  | Potri.002G246100.3 | 2.2316  | 9.617   | -2.1075 | Down | 5.01E-08 | 1.27E-07 |

|               |                    |         |          |         |      |           |           |
|---------------|--------------------|---------|----------|---------|------|-----------|-----------|
| Unigene35561  | Potri.002G139200.1 | 1.4046  | 6.053    | -2.1075 | Down | 1.36E-05  | 2.84E-05  |
| Unigene83643  | Potri.002G111000.1 | 0.8258  | 3.5588   | -2.1075 | Down | 4.15E-04  | 7.42E-04  |
| Unigene84578  | Potri.002G072900.2 | 29.8396 | 128.5927 | -2.1075 | Down | 5.06E-107 | 1.18E-105 |
| Unigene27175  | Potri.002G041300.1 | 0.7435  | 3.2041   | -2.1075 | Down | 4.15E-04  | 7.42E-04  |
| Unigene18531  | Potri.002G032400.1 | 2.6969  | 11.6221  | -2.1075 | Down | 4.91E-60  | 5.84E-59  |
| Unigene26004  | Potri.002G029100.2 | 1.4556  | 6.2728   | -2.1075 | Down | 4.21E-05  | 8.39E-05  |
| Unigene20352  | Potri.002G004700.1 | 1.8107  | 7.803    | -2.1075 | Down | 6.51E-11  | 1.96E-10  |
| Unigene117319 | Potri.001G470000.1 | 1.1558  | 4.9807   | -2.1075 | Down | 1.43E-06  | 3.25E-06  |
| Unigene36302  | Potri.001G469300.3 | 5.2085  | 22.4458  | -2.1075 | Down | 3.69E-16  | 1.41E-15  |
| Unigene94525  | Potri.001G423200.1 | 0.7794  | 3.3588   | -2.1075 | Down | 1.32E-04  | 2.50E-04  |
| Unigene4995   | Potri.001G416500.2 | 3.3094  | 14.2617  | -2.1075 | Down | 3.22E-24  | 1.64E-23  |
| Unigene65900  | Potri.001G407600.1 | 0.8911  | 3.8402   | -2.1075 | Down | 1.32E-04  | 2.50E-04  |
| Unigene65102  | Potri.001G385400.1 | 1.4513  | 6.2545   | -2.1075 | Down | 4.39E-06  | 9.57E-06  |
| Unigene45678  | Potri.001G383600.1 | 1.5276  | 6.5832   | -2.1075 | Down | 1.56E-18  | 6.56E-18  |
| Unigene105633 | Potri.001G378900.1 | 1.2351  | 5.3225   | -2.1075 | Down | 4.39E-06  | 9.57E-06  |
| Unigene65539  | Potri.001G355800.1 | 4.0608  | 17.5     | -2.1075 | Down | 2.96E-14  | 1.04E-13  |
| Unigene16343  | Potri.001G330800.1 | 1.119   | 4.8222   | -2.1075 | Down | 4.15E-04  | 7.42E-04  |
| Unigene7583   | Potri.001G306000.1 | 2.7437  | 11.8239  | -2.1075 | Down | 5.22E-19  | 2.24E-18  |
| Unigene59278  | Potri.001G297900.1 | 1.3165  | 5.6732   | -2.1075 | Down | 1.36E-05  | 2.84E-05  |
| Unigene9092   | Potri.001G256800.2 | 1.6056  | 6.9193   | -2.1075 | Down | 1.53E-07  | 3.73E-07  |
| Unigene3908   | Potri.001G185100.1 | 0.9503  | 4.0953   | -2.1075 | Down | 5.43E-09  | 1.46E-08  |
| Unigene73742  | Potri.001G101400.1 | 5.982   | 25.7792  | -2.1075 | Down | 1.39E-17  | 5.63E-17  |
| Unigene101859 | Potri.001G078100.1 | 1.3586  | 5.8548   | -2.1075 | Down | 7.19E-12  | 2.27E-11  |
| Unigene41568  | Potri.001G051500.1 | 0.8851  | 3.8142   | -2.1075 | Down | 1.32E-04  | 2.50E-04  |
| Unigene51333  | Potri.001G025600.1 | 1.1158  | 4.8085   | -2.1075 | Down | 1.32E-04  | 2.50E-04  |
| Unigene9965   | Potri.019G056800.1 | 0.9764  | 4.2079   | -2.1076 | Down | 4.39E-06  | 9.57E-06  |
| Unigene66636  | Potri.018G070200.2 | 0.9238  | 3.9812   | -2.1076 | Down | 4.21E-05  | 8.39E-05  |
| Unigene112653 | Potri.018G043700.2 | 1.2179  | 5.2487   | -2.1076 | Down | 4.21E-05  | 8.39E-05  |
| Unigene53421  | Potri.016G013300.1 | 1.8867  | 8.1309   | -2.1076 | Down | 1.53E-07  | 3.73E-07  |
| Unigene94989  | Potri.015G139900.1 | 1.0759  | 4.6368   | -2.1076 | Down | 4.15E-04  | 7.42E-04  |
| Unigene52350  | Potri.010G197400.6 | 1.4277  | 6.1528   | -2.1076 | Down | 5.43E-09  | 1.46E-08  |
| Unigene53942  | Potri.010G121100.1 | 0.7528  | 3.2443   | -2.1076 | Down | 1.43E-06  | 3.25E-06  |
| Unigene30924  | Potri.005G009900.1 | 0.773   | 3.3314   | -2.1076 | Down | 4.21E-05  | 8.39E-05  |
| Unigene25572  | Potri.005G005000.1 | 0.9674  | 4.1691   | -2.1076 | Down | 1.36E-05  | 2.84E-05  |
| Unigene115428 | Potri.004G095700.1 | 0.9034  | 3.8934   | -2.1076 | Down | 1.32E-04  | 2.50E-04  |
| Unigene51929  | Potri.003G197600.2 | 1.0129  | 4.3652   | -2.1076 | Down | 1.79E-09  | 4.96E-09  |
| Unigene33824  | Potri.003G003900.1 | 0.8863  | 3.8196   | -2.1076 | Down | 4.66E-07  | 1.10E-06  |
| Unigene30017  | Potri.001G423600.1 | 1.0596  | 4.5665   | -2.1076 | Down | 4.39E-06  | 9.57E-06  |
| Unigene14261  | Potri.001G423600.1 | 0.7664  | 3.3029   | -2.1076 | Down | 1.36E-05  | 2.84E-05  |

|               |                    |         |          |         |      |           |           |
|---------------|--------------------|---------|----------|---------|------|-----------|-----------|
| Unigene61931  | Potri.001G205500.2 | 1.136   | 4.8957   | -2.1076 | Down | 5.93E-10  | 1.69E-09  |
| Unigene87141  | Potri.002G238200.1 | 29.5038 | 127.2747 | -2.109  | Down | 1.43E-117 | 3.74E-116 |
| Unigene5200   | Potri.005G229600.2 | 51.2356 | 221.0922 | -2.1094 | Down | 2.48E-178 | 1.12E-176 |
| Unigene567    | Potri.019G043400.1 | 6.0533  | 26.1242  | -2.1096 | Down | 2.74E-83  | 4.69E-82  |
| Unigene24505  | Potri.010G119600.1 | 6.4518  | 27.8473  | -2.1098 | Down | 3.51E-77  | 5.53E-76  |
| Unigene21972  | Potri.013G115300.2 | 7.0367  | 30.3775  | -2.11   | Down | 3.44E-69  | 4.77E-68  |
| Unigene34887  | Potri.005G244700.1 | 31.6932 | 136.8269 | -2.1101 | Down | 2.41E-132 | 7.33E-131 |
| Unigene246    | Potri.010G070200.1 | 2.493   | 10.7643  | -2.1103 | Down | 4.45E-63  | 5.59E-62  |
| Unigene14801  | Potri.001G472600.8 | 13.6376 | 58.8964  | -2.1106 | Down | 5.79E-57  | 6.51E-56  |
| Unigene44618  | Potri.007G129400.1 | 6.4816  | 27.9979  | -2.1109 | Down | 8.67E-52  | 8.79E-51  |
| Unigene11041  | Potri.012G043800.1 | 6.7059  | 28.9707  | -2.1111 | Down | 1.16E-96  | 2.37E-95  |
| Unigene25705  | Potri.001G355800.1 | 3.0756  | 13.2893  | -2.1113 | Down | 3.86E-46  | 3.48E-45  |
| Unigene46461  | Potri.010G106800.2 | 31.6586 | 136.8033 | -2.1114 | Down | 1.26E-131 | 3.80E-130 |
| Unigene563    | Potri.007G115400.3 | 2.3424  | 10.1217  | -2.1114 | Down | 3.38E-45  | 2.98E-44  |
| Unigene34345  | Potri.005G190000.1 | 6.9668  | 30.1073  | -2.1115 | Down | 7.36E-86  | 1.31E-84  |
| Unigene43756  | Potri.003G044200.3 | 8.6188  | 37.2474  | -2.1116 | Down | 2.17E-85  | 3.84E-84  |
| Unigene110466 | Potri.001G406900.1 | 13.8208 | 59.7396  | -2.1118 | Down | 5.87E-41  | 4.71E-40  |
| Unigene2685   | Potri.018G038500.1 | 7.6102  | 32.8972  | -2.112  | Down | 2.42E-78  | 3.88E-77  |
| Unigene8111   | Potri.007G047800.1 | 3.8487  | 16.6372  | -2.112  | Down | 5.14E-40  | 4.03E-39  |
| Unigene19317  | Potri.001G089600.1 | 3.3561  | 14.5088  | -2.1121 | Down | 4.50E-39  | 3.45E-38  |
| Unigene43576  | Potri.017G048000.1 | 11.963  | 51.723   | -2.1122 | Down | 3.75E-218 | 2.16E-216 |
| Unigene18471  | Potri.006G279200.2 | 2.6047  | 11.2623  | -2.1123 | Down | 3.46E-37  | 2.53E-36  |
| Unigene80057  | Potri.003G018900.1 | 33.2057 | 143.5886 | -2.1124 | Down | 2.45E-105 | 5.56E-104 |
| Unigene32649  | Potri.001G451100.1 | 12.5498 | 54.2712  | -2.1125 | Down | 1.76E-137 | 5.64E-136 |
| Unigene49434  | Potri.001G358300.1 | 58.2166 | 251.7485 | -2.1125 | Down | 0         | 0         |
| Unigene1187   | Potri.016G035500.1 | 7.2138  | 31.1979  | -2.1126 | Down | 1.40E-101 | 3.05E-100 |
| Unigene16611  | Potri.001G109500.1 | 10.6356 | 45.9951  | -2.1126 | Down | 2.66E-35  | 1.86E-34  |
| Unigene10853  | Potri.001G353300.1 | 2.1113  | 9.1315   | -2.1127 | Down | 2.33E-34  | 1.59E-33  |
| Unigene18155  | Potri.005G254000.1 | 14.7025 | 63.5941  | -2.1128 | Down | 7.99E-98  | 1.66E-96  |
| Unigene41759  | Potri.002G006200.1 | 5.932   | 25.6604  | -2.113  | Down | 6.07E-33  | 4.00E-32  |
| Unigene34475  | Potri.008G211200.1 | 3.5843  | 15.5069  | -2.1131 | Down | 5.33E-32  | 3.42E-31  |
| Unigene11471  | Potri.010G076100.1 | 14.669  | 63.4669  | -2.1132 | Down | 1.06E-239 | 6.90E-238 |
| Unigene4119   | Potri.006G198300.2 | 8.8604  | 38.3376  | -2.1133 | Down | 4.69E-31  | 2.93E-30  |
| Unigene30638  | Potri.012G017500.1 | 13.5635 | 58.6895  | -2.1134 | Down | 6.71E-89  | 1.24E-87  |
| Unigene67593  | Potri.008G058300.1 | 8.0683  | 34.9127  | -2.1134 | Down | 1.39E-30  | 8.58E-30  |
| Unigene13082  | Potri.005G114300.1 | 23.9783 | 103.7586 | -2.1134 | Down | 7.93E-117 | 2.06E-115 |
| Unigene6830   | Potri.003G223400.1 | 16.4979 | 71.3867  | -2.1134 | Down | 6.71E-89  | 1.24E-87  |
| Unigene63290  | Potri.003G068400.1 | 3.3658  | 14.5642  | -2.1134 | Down | 1.39E-30  | 8.58E-30  |
| Unigene43008  | Potri.010G034800.3 | 7.1387  | 30.892   | -2.1135 | Down | 1.35E-58  | 1.56E-57  |

|              |                    |         |          |         |      |           |           |
|--------------|--------------------|---------|----------|---------|------|-----------|-----------|
| Unigene44760 | Potri.012G082100.1 | 7.6715  | 33.2027  | -2.1137 | Down | 3.35E-84  | 5.82E-83  |
| Unigene18986 | Potri.004G173600.1 | 14.4284 | 62.45    | -2.1138 | Down | 2.97E-110 | 7.19E-109 |
| Unigene11497 | Potri.003G031000.2 | 12.7757 | 55.2968  | -2.1138 | Down | 3.12E-137 | 9.95E-136 |
| Unigene46661 | Potri.003G129000.3 | 7.9978  | 34.6188  | -2.1139 | Down | 2.65E-55  | 2.88E-54  |
| Unigene86    | Potri.001G357900.1 | 15.4405 | 66.8464  | -2.1141 | Down | 0         | 0         |
| Unigene42181 | Potri.018G128000.3 | 5.7725  | 24.9962  | -2.1144 | Down | 2.48E-26  | 1.35E-25  |
| Unigene94811 | Potri.001G068000.1 | 3.1033  | 13.4379  | -2.1144 | Down | 2.48E-26  | 1.35E-25  |
| Unigene33779 | Potri.012G016900.2 | 2.5724  | 11.1399  | -2.1145 | Down | 3.97E-50  | 3.90E-49  |
| Unigene43694 | Potri.008G105200.1 | 2.2353  | 9.6803   | -2.1146 | Down | 7.36E-26  | 3.96E-25  |
| Unigene23178 | Potri.001G367400.4 | 2.3488  | 10.1728  | -2.1147 | Down | 2.19E-25  | 1.16E-24  |
| Unigene47617 | Potri.013G142000.1 | 4.6864  | 20.2987  | -2.1148 | Down | 6.50E-25  | 3.39E-24  |
| Unigene20945 | Potri.006G235400.2 | 9.8876  | 42.8267  | -2.1148 | Down | 1.86E-118 | 4.93E-117 |
| Unigene45241 | Potri.005G215100.1 | 13.6394 | 59.0782  | -2.1148 | Down | 2.01E-164 | 8.15E-163 |
| Unigene31875 | Potri.002G106800.1 | 24.1116 | 104.4359 | -2.1148 | Down | 0         | 0         |
| Unigene50628 | Potri.007G047900.2 | 3.5523  | 15.3884  | -2.115  | Down | 1.93E-24  | 9.93E-24  |
| Unigene34860 | Potri.004G050700.1 | 16.1556 | 69.9882  | -2.1151 | Down | 5.52E-137 | 1.76E-135 |
| Unigene51750 | Potri.008G116600.1 | 7.4283  | 32.1822  | -2.1152 | Down | 5.74E-24  | 2.91E-23  |
| Unigene49071 | Potri.006G107400.1 | 6.0399  | 26.1775  | -2.1157 | Down | 5.43E-64  | 6.93E-63  |
| Unigene11919 | Potri.003G187100.1 | 23.7565 | 102.9594 | -2.1157 | Down | 2.60E-252 | 1.81E-250 |
| Unigene43599 | Potri.005G223900.2 | 2.7831  | 12.0625  | -2.1158 | Down | 4.59E-43  | 3.86E-42  |
| Unigene75160 | Potri.003G071700.8 | 44.4529 | 192.6688 | -2.1158 | Down | 1.02E-125 | 2.89E-124 |
| Unigene23641 | Potri.016G000600.1 | 22.2163 | 96.3004  | -2.1159 | Down | 1.40E-285 | 1.16E-283 |
| Unigene33306 | Potri.002G147200.1 | 1.9583  | 8.4885   | -2.1159 | Down | 4.49E-22  | 2.14E-21  |
| Unigene62847 | Potri.010G012800.4 | 7.2864  | 31.5874  | -2.1161 | Down | 1.34E-21  | 6.27E-21  |
| Unigene52812 | Potri.004G138000.1 | 5.6967  | 24.6956  | -2.1161 | Down | 1.34E-21  | 6.27E-21  |
| Unigene21742 | Potri.001G148100.1 | 3.5931  | 15.5764  | -2.1161 | Down | 1.19E-41  | 9.70E-41  |
| Unigene79116 | Potri.014G195700.1 | 18.4944 | 80.203   | -2.1166 | Down | 2.39E-58  | 2.76E-57  |
| Unigene8260  | Potri.013G094800.1 | 3.7206  | 16.1347  | -2.1166 | Down | 2.39E-58  | 2.76E-57  |
| Unigene12491 | Potri.006G224600.2 | 9.0112  | 39.0792  | -2.1166 | Down | 2.70E-39  | 2.08E-38  |
| Unigene276   | Potri.007G023400.1 | 10.4712 | 45.4203  | -2.1169 | Down | 1.48E-74  | 2.24E-73  |
| Unigene41517 | Potri.010G012800.5 | 3.5171  | 15.2564  | -2.117  | Down | 1.05E-19  | 4.62E-19  |
| Unigene50846 | Potri.008G115300.2 | 3.1497  | 13.663   | -2.117  | Down | 1.05E-19  | 4.62E-19  |
| Unigene51626 | Potri.001G258900.1 | 13.5526 | 58.7919  | -2.117  | Down | 1.59E-55  | 1.74E-54  |
| Unigene52378 | Potri.012G007000.3 | 12.2131 | 52.9876  | -2.1172 | Down | 3.32E-72  | 4.83E-71  |
| Unigene11196 | Potri.006G050700.3 | 8.5215  | 36.9704  | -2.1172 | Down | 4.65E-143 | 1.56E-141 |
| Unigene30959 | Potri.003G005700.3 | 12.745  | 55.3019  | -2.1174 | Down | 1.21E-53  | 1.27E-52  |
| Unigene18131 | Potri.009G131600.1 | 3.0553  | 13.2579  | -2.1175 | Down | 5.39E-36  | 3.83E-35  |
| Unigene14593 | Potri.008G183600.4 | 4.9549  | 21.5013  | -2.1175 | Down | 9.33E-19  | 3.96E-18  |
| Unigene33085 | Potri.005G116400.1 | 6.059   | 26.2963  | -2.1177 | Down | 6.48E-69  | 8.96E-68  |

|               |                    |         |          |         |      |           |           |
|---------------|--------------------|---------|----------|---------|------|-----------|-----------|
| Unigene103193 | Potri.017G110300.1 | 2.3147  | 10.0463  | -2.1178 | Down | 2.78E-18  | 1.16E-17  |
| Unigene23782  | Potri.016G015700.1 | 2.4153  | 10.4831  | -2.1178 | Down | 4.73E-35  | 3.28E-34  |
| Unigene41     | Potri.008G119100.1 | 9.1847  | 39.8654  | -2.1178 | Down | 8.51E-267 | 6.42E-265 |
| Unigene7292   | Potri.005G231500.1 | 8.9545  | 38.8665  | -2.1178 | Down | 5.65E-68  | 7.69E-67  |
| Unigene16939  | Potri.004G039500.1 | 7.0758  | 30.7106  | -2.1178 | Down | 4.73E-35  | 3.28E-34  |
| Unigene25617  | Potri.016G022800.2 | 7.333   | 31.8291  | -2.1179 | Down | 2.73E-51  | 2.74E-50  |
| Unigene34420  | Potri.003G068500.1 | 3.3702  | 14.6287  | -2.1179 | Down | 2.73E-51  | 2.74E-50  |
| Unigene33983  | Potri.005G158800.1 | 8.5729  | 37.2145  | -2.118  | Down | 3.10E-83  | 5.31E-82  |
| Unigene42055  | Potri.001G201800.1 | 19.6859 | 85.4556  | -2.118  | Down | 3.10E-83  | 5.31E-82  |
| Unigene118345 | Potri.017G012100.1 | 20.0377 | 87.0056  | -2.1184 | Down | 7.40E-112 | 1.82E-110 |
| Unigene10897  | Potri.009G055800.1 | 8.4473  | 36.6801  | -2.1184 | Down | 8.22E-143 | 2.75E-141 |
| Unigene35616  | Potri.007G123800.5 | 4.9833  | 21.6382  | -2.1184 | Down | 2.48E-17  | 9.96E-17  |
| Unigene24545  | Potri.007G112400.4 | 3.0927  | 13.4287  | -2.1184 | Down | 2.48E-17  | 9.96E-17  |
| Unigene12355  | Potri.014G045500.1 | 5.7794  | 25.0978  | -2.1186 | Down | 9.63E-64  | 1.22E-62  |
| Unigene11186  | Potri.013G154900.2 | 2.5683  | 11.1531  | -2.1186 | Down | 1.08E-32  | 7.06E-32  |
| Unigene31935  | Potri.018G106900.1 | 2.4016  | 10.4304  | -2.1187 | Down | 7.39E-17  | 2.92E-16  |
| Unigene93714  | Potri.010G212700.2 | 28.7331 | 124.7856 | -2.1187 | Down | 7.19E-232 | 4.46E-230 |
| Unigene21874  | Potri.004G077800.1 | 3.3974  | 14.7564  | -2.1188 | Down | 4.71E-47  | 4.33E-46  |
| Unigene24288  | Potri.004G032200.1 | 6.6663  | 28.9561  | -2.1189 | Down | 6.15E-122 | 1.69E-120 |
| Unigene38045  | Potri.001G471400.1 | 3.4255  | 14.8791  | -2.1189 | Down | 9.48E-32  | 6.04E-31  |
| Unigene12715  | Potri.005G234900.1 | 10.6667 | 46.3338  | -2.119  | Down | 1.17E-76  | 1.84E-75  |
| Unigene21825  | Potri.002G192900.5 | 8.5625  | 37.1945  | -2.119  | Down | 3.19E-106 | 7.33E-105 |
| Unigene53116  | Potri.010G110700.1 | 5.1163  | 22.2263  | -2.1191 | Down | 2.21E-16  | 8.54E-16  |
| Unigene50652  | Potri.009G134100.3 | 4.8179  | 20.9298  | -2.1191 | Down | 2.81E-31  | 1.77E-30  |
| Unigene52348  | Potri.016G090800.2 | 14.5112 | 63.0434  | -2.1192 | Down | 6.80E-134 | 2.10E-132 |
| Unigene33135  | Potri.018G105400.3 | 1.9994  | 8.6868   | -2.1193 | Down | 8.34E-31  | 5.18E-30  |
| Unigene4818   | Potri.004G022600.1 | 11.6242 | 50.5067  | -2.1193 | Down | 3.60E-45  | 3.17E-44  |
| Unigene26851  | Potri.T127500.1    | 3.1344  | 13.6202  | -2.1195 | Down | 6.60E-16  | 2.50E-15  |
| Unigene30230  | Potri.013G032300.2 | 3.1699  | 13.7745  | -2.1195 | Down | 6.60E-16  | 2.50E-15  |
| Unigene118906 | Potri.009G033300.1 | 2.156   | 9.3688   | -2.1195 | Down | 6.60E-16  | 2.50E-15  |
| Unigene14664  | Potri.001G131400.2 | 10.4578 | 45.4431  | -2.1195 | Down | 1.06E-44  | 9.28E-44  |
| Unigene32864  | Potri.016G043100.1 | 10.8408 | 47.1137  | -2.1197 | Down | 1.99E-114 | 5.06E-113 |
| Unigene28164  | Potri.015G040000.1 | 2.1428  | 9.3126   | -2.1197 | Down | 7.33E-30  | 4.43E-29  |
| Unigene34964  | Potri.009G167500.1 | 2.7338  | 11.8808  | -2.1197 | Down | 7.33E-30  | 4.43E-29  |
| Unigene3514   | Potri.014G031200.1 | 6.7538  | 29.3534  | -2.1198 | Down | 8.33E-86  | 1.48E-84  |
| Unigene35280  | Potri.018G150700.2 | 10.1499 | 44.1175  | -2.1199 | Down | 1.04E-98  | 2.20E-97  |
| Unigene9191   | Potri.010G074800.1 | 4.3389  | 18.8624  | -2.1201 | Down | 6.45E-29  | 3.80E-28  |
| Unigene49013  | Potri.012G027800.6 | 2.9755  | 12.9371  | -2.1203 | Down | 5.90E-15  | 2.15E-14  |
| Unigene21280  | Potri.007G127400.2 | 7.2818  | 31.6628  | -2.1204 | Down | 1.38E-134 | 4.31E-133 |

|               |                    |         |          |         |      |           |           |
|---------------|--------------------|---------|----------|---------|------|-----------|-----------|
| Unigene12510  | Potri.004G095000.5 | 1.3304  | 5.7846   | -2.1204 | Down | 5.90E-15  | 2.15E-14  |
| Unigene606    | Potri.017G026200.2 | 2.6737  | 11.6288  | -2.1208 | Down | 3.15E-79  | 5.12E-78  |
| Unigene33183  | Potri.008G117900.1 | 6.6584  | 28.9599  | -2.1208 | Down | 2.15E-53  | 2.25E-52  |
| Unigene99086  | Potri.007G038100.1 | 1.3062  | 5.6812   | -2.1208 | Down | 1.77E-14  | 6.29E-14  |
| Unigene29424  | Potri.014G132900.1 | 3.0109  | 13.0965  | -2.1209 | Down | 7.60E-66  | 1.00E-64  |
| Unigene21226  | Potri.013G048300.2 | 17.0529 | 74.177   | -2.121  | Down | 0         | 0         |
| Unigene45400  | Potri.004G099100.1 | 5.4551  | 23.7291  | -2.121  | Down | 5.47E-40  | 4.29E-39  |
| Unigene31501  | Potri.003G070400.1 | 4.4225  | 19.2386  | -2.1211 | Down | 5.00E-27  | 2.79E-26  |
| Unigene6696   | Potri.001G415300.3 | 3.0022  | 13.0602  | -2.1211 | Down | 6.63E-65  | 8.59E-64  |
| Unigene7176   | Potri.016G013900.2 | 2.0634  | 8.9775   | -2.1213 | Down | 5.29E-14  | 1.85E-13  |
| Unigene35927  | Potri.002G029300.3 | 16.929  | 73.6562  | -2.1213 | Down | 7.59E-89  | 1.40E-87  |
| Unigene40336  | Potri.017G106900.2 | 14.2356 | 61.9423  | -2.1214 | Down | 1.71E-63  | 2.16E-62  |
| Unigene7995   | Potri.012G088500.2 | 4.5124  | 19.6336  | -2.1214 | Down | 3.07E-113 | 7.67E-112 |
| Unigene81206  | Potri.001G407800.1 | 72.3877 | 314.9694 | -2.1214 | Down | 1.65E-236 | 1.06E-234 |
| Unigene54335  | Potri.008G042100.1 | 7.3165  | 31.839   | -2.1216 | Down | 4.41E-26  | 2.39E-25  |
| Unigene44501  | Potri.008G178200.1 | 24.2795 | 105.6902 | -2.122  | Down | 1.89E-285 | 1.56E-283 |
| Unigene4168   | Potri.007G047500.1 | 8.5806  | 37.3553  | -2.1222 | Down | 1.09E-48  | 1.04E-47  |
| Unigene36571  | Potri.006G255000.1 | 2.8509  | 12.4139  | -2.1225 | Down | 4.76E-13  | 1.59E-12  |
| Unigene105336 | Potri.005G083200.1 | 1.1024  | 4.8004   | -2.1225 | Down | 4.76E-13  | 1.59E-12  |
| Unigene475    | Potri.003G031700.1 | 9.7507  | 42.4634  | -2.1226 | Down | 8.20E-161 | 3.21E-159 |
| Unigene34915  | Potri.016G117800.1 | 4.1591  | 18.1143  | -2.1228 | Down | 6.92E-92  | 1.33E-90  |
| Unigene105407 | Potri.014G137200.1 | 1.1152  | 4.857    | -2.1228 | Down | 3.44E-24  | 1.75E-23  |
| Unigene52500  | Potri.009G074800.1 | 29.9843 | 130.6019 | -2.1229 | Down | 1.71E-180 | 7.85E-179 |
| Unigene12213  | Potri.008G068400.1 | 14.5955 | 63.578   | -2.123  | Down | 1.89E-79  | 3.08E-78  |
| Unigene29027  | Potri.006G005800.1 | 4.3469  | 18.9344  | -2.123  | Down | 2.47E-46  | 2.23E-45  |
| Unigene43339  | Potri.019G045900.1 | 2.7854  | 12.1338  | -2.1231 | Down | 8.39E-35  | 5.78E-34  |
| Unigene118739 | Potri.005G072200.1 | 3.5671  | 15.5394  | -2.1231 | Down | 1.02E-23  | 5.13E-23  |
| Unigene116122 | Potri.003G015300.3 | 2.7854  | 12.1338  | -2.1231 | Down | 1.43E-12  | 4.67E-12  |
| Unigene39796  | Potri.012G017500.1 | 6.54    | 28.4936  | -2.1233 | Down | 2.16E-45  | 1.91E-44  |
| Unigene111615 | Potri.011G045500.1 | 7.173   | 31.2552  | -2.1234 | Down | 3.04E-23  | 1.50E-22  |
| Unigene20686  | Potri.006G111100.2 | 4.9659  | 21.6382  | -2.1235 | Down | 3.04E-23  | 1.50E-22  |
| Unigene42547  | Potri.005G190000.1 | 3.5463  | 15.4532  | -2.1235 | Down | 1.69E-55  | 1.85E-54  |
| Unigene42834  | Potri.005G001800.1 | 10.3712 | 45.1918  | -2.1235 | Down | 2.22E-163 | 8.93E-162 |
| Unigene21352  | Potri.002G137600.1 | 6.4973  | 28.3111  | -2.1235 | Down | 2.84E-131 | 8.54E-130 |
| Unigene109996 | Potri.002G063500.2 | 15.1583 | 66.0579  | -2.1236 | Down | 1.89E-44  | 1.64E-43  |
| Unigene7127   | Potri.005G139500.1 | 1.1945  | 5.2059   | -2.1237 | Down | 4.29E-12  | 1.37E-11  |
| Unigene10125  | Potri.004G091100.2 | 8.6616  | 37.7472  | -2.1237 | Down | 4.99E-55  | 5.40E-54  |
| Unigene34987  | Potri.009G084600.2 | 0.846   | 3.6871   | -2.1238 | Down | 4.29E-12  | 1.37E-11  |
| Unigene33173  | Potri.006G061800.2 | 4.0623  | 17.7054  | -2.1238 | Down | 9.03E-23  | 4.40E-22  |



|               |                    |         |          |         |      |           |           |
|---------------|--------------------|---------|----------|---------|------|-----------|-----------|
| Unigene26896  | Potri.004G130400.3 | 1.0985  | 4.7878   | -2.1238 | Down | 4.29E-12  | 1.37E-11  |
| Unigene56104  | Potri.011G003000.1 | 4.8811  | 21.2781  | -2.1241 | Down | 7.70E-85  | 1.35E-83  |
| Unigene21197  | Potri.013G048700.1 | 8.5204  | 37.1493  | -2.1243 | Down | 0         | 0         |
| Unigene12685  | Potri.002G026600.3 | 10.311  | 44.9567  | -2.1244 | Down | 2.43E-73  | 3.60E-72  |
| Unigene23597  | Potri.019G021200.1 | 5.06    | 22.0655  | -2.1246 | Down | 3.32E-52  | 3.39E-51  |
| Unigene28277  | Potri.012G118500.1 | 1.9012  | 8.2906   | -2.1246 | Down | 1.29E-11  | 4.02E-11  |
| Unigene64804  | Potri.010G192300.1 | 2.9897  | 13.0372  | -2.1246 | Down | 1.29E-11  | 4.02E-11  |
| Unigene46869  | Potri.005G232600.1 | 1.3742  | 5.9925   | -2.1246 | Down | 1.29E-11  | 4.02E-11  |
| Unigene36997  | Potri.007G098400.2 | 43.5625 | 189.9801 | -2.1247 | Down | 4.05E-152 | 1.48E-150 |
| Unigene6027   | Potri.001G161700.4 | 7.2136  | 31.4658  | -2.125  | Down | 2.38E-21  | 1.11E-20  |
| Unigene85712  | Potri.007G105900.3 | 18.1388 | 79.1318  | -2.1252 | Down | 4.74E-70  | 6.67E-69  |
| Unigene42534  | Potri.005G235400.1 | 1.5363  | 6.7021   | -2.1252 | Down | 4.99E-31  | 3.12E-30  |
| Unigene2327   | Potri.013G088500.1 | 4.5557  | 19.8779  | -2.1254 | Down | 3.28E-40  | 2.58E-39  |
| Unigene28911  | Potri.010G211100.3 | 6.4806  | 28.277   | -2.1254 | Down | 2.38E-88  | 4.36E-87  |
| Unigene17271  | Potri.007G068500.1 | 2.984   | 13.02    | -2.1254 | Down | 1.48E-30  | 9.13E-30  |
| Unigene117503 | Potri.007G010600.2 | 2.0438  | 8.9178   | -2.1254 | Down | 3.89E-11  | 1.18E-10  |
| Unigene27182  | Potri.001G324500.1 | 1.9946  | 8.7032   | -2.1254 | Down | 3.89E-11  | 1.18E-10  |
| Unigene21820  | Potri.010G102100.1 | 4.2118  | 18.3814  | -2.1257 | Down | 1.52E-58  | 1.77E-57  |
| Unigene83817  | Potri.015G004600.1 | 7.9244  | 34.5917  | -2.1261 | Down | 1.30E-29  | 7.82E-29  |
| Unigene5750   | Potri.014G010100.1 | 6.904   | 30.1389  | -2.1261 | Down | 8.50E-39  | 6.47E-38  |
| Unigene8425   | Potri.007G024100.1 | 13.4809 | 58.848   | -2.1261 | Down | 1.12E-94  | 2.23E-93  |
| Unigene94696  | Potri.011G116300.4 | 1.4873  | 6.4937   | -2.1263 | Down | 6.28E-20  | 2.79E-19  |
| Unigene28661  | Potri.006G140300.2 | 3.5613  | 15.549   | -2.1263 | Down | 3.86E-29  | 2.29E-28  |
| Unigene36195  | Potri.010G153700.1 | 1.1467  | 5.0069   | -2.1264 | Down | 1.17E-10  | 3.47E-10  |
| Unigene31418  | Potri.002G064400.1 | 1.2499  | 5.4573   | -2.1264 | Down | 1.17E-10  | 3.47E-10  |
| Unigene13837  | Potri.002G208800.1 | 2.8229  | 12.3272  | -2.1266 | Down | 7.45E-38  | 5.56E-37  |
| Unigene20154  | Potri.001G135900.3 | 13.1741 | 57.5326  | -2.1267 | Down | 8.03E-119 | 2.14E-117 |
| Unigene113241 | Potri.001G000900.5 | 16.5776 | 72.3972  | -2.1267 | Down | 1.01E-55  | 1.11E-54  |
| Unigene21910  | Potri.004G143300.1 | 1.5386  | 6.7199   | -2.1268 | Down | 1.87E-19  | 8.16E-19  |
| Unigene24060  | Potri.008G163800.1 | 1.7716  | 7.7378   | -2.1269 | Down | 1.87E-19  | 8.16E-19  |
| Unigene35158  | Potri.005G241800.1 | 4.2076  | 18.3774  | -2.1269 | Down | 1.87E-19  | 8.16E-19  |
| Unigene27224  | Potri.013G118000.5 | 9.9586  | 43.5015  | -2.1271 | Down | 3.40E-28  | 1.96E-27  |
| Unigene10901  | Potri.005G218900.2 | 8.3396  | 36.4321  | -2.1272 | Down | 5.26E-116 | 1.36E-114 |
| Unigene19671  | Potri.017G057900.1 | 31.1548 | 136.1187 | -2.1273 | Down | 4.45E-141 | 1.47E-139 |
| Unigene43866  | Potri.004G211300.1 | 0.6965  | 3.0431   | -2.1273 | Down | 3.54E-10  | 1.02E-09  |
| Unigene61597  | Potri.018G001800.2 | 6.4146  | 28.0273  | -2.1274 | Down | 1.01E-27  | 5.74E-27  |
| Unigene62383  | Potri.016G005300.1 | 2.1247  | 9.2833   | -2.1274 | Down | 3.54E-10  | 1.02E-09  |
| Unigene11518  | Potri.012G054900.1 | 2.8269  | 12.3517  | -2.1274 | Down | 1.93E-36  | 1.39E-35  |
| Unigene29550  | Potri.011G015600.1 | 2.437   | 10.648   | -2.1274 | Down | 5.58E-19  | 2.39E-18  |

|               |                    |         |          |         |      |           |           |
|---------------|--------------------|---------|----------|---------|------|-----------|-----------|
| Unigene45084  | Potri.003G133300.1 | 0.955   | 4.1729   | -2.1275 | Down | 3.54E-10  | 1.02E-09  |
| Unigene25532  | Potri.013G145400.2 | 4.1862  | 18.2936  | -2.1276 | Down | 1.13E-44  | 9.85E-44  |
| Unigene6531   | Potri.010G059000.1 | 8.0387  | 35.1274  | -2.1276 | Down | 4.66E-62  | 5.75E-61  |
| Unigene15667  | Potri.001G230100.1 | 17.5941 | 76.8826  | -2.1276 | Down | 4.66E-62  | 5.75E-61  |
| Unigene51971  | Potri.014G069400.1 | 11.0345 | 48.2222  | -2.1277 | Down | 2.84E-70  | 4.02E-69  |
| Unigene41659  | Potri.018G126600.1 | 6.8642  | 29.9994  | -2.1278 | Down | 3.00E-27  | 1.68E-26  |
| Unigene15448  | Potri.018G114100.1 | 64.3096 | 281.0985 | -2.128  | Down | 1.37E-170 | 5.81E-169 |
| Unigene35008  | Potri.008G176100.1 | 6.8739  | 30.0479  | -2.1281 | Down | 1.20E-60  | 1.44E-59  |
| Unigene44838  | Potri.006G140400.1 | 9.2583  | 40.4722  | -2.1281 | Down | 6.46E-136 | 2.03E-134 |
| Unigene60436  | Potri.003G207600.1 | 5.7096  | 24.9582  | -2.1281 | Down | 1.20E-60  | 1.44E-59  |
| Unigene6834   | Potri.008G021400.2 | 5.1448  | 22.4909  | -2.1282 | Down | 8.89E-27  | 4.92E-26  |
| Unigene112743 | Potri.016G087800.1 | 2.5776  | 11.2715  | -2.1286 | Down | 1.07E-09  | 2.99E-09  |
| Unigene79891  | Potri.016G043500.1 | 2.5881  | 11.3175  | -2.1286 | Down | 1.07E-09  | 2.99E-09  |
| Unigene30550  | Potri.006G192600.2 | 2.8954  | 12.6611  | -2.1286 | Down | 1.07E-09  | 2.99E-09  |
| Unigene35144  | Potri.003G221200.3 | 12.515  | 54.7259  | -2.1286 | Down | 5.14E-51  | 5.12E-50  |
| Unigene100140 | Potri.001G317200.2 | 1.2433  | 5.4368   | -2.1286 | Down | 1.07E-09  | 2.99E-09  |
| Unigene49098  | Potri.018G057900.1 | 11.9891 | 52.4321  | -2.1287 | Down | 5.55E-67  | 7.46E-66  |
| Unigene62750  | Potri.004G071600.4 | 12.7704 | 55.8506  | -2.1288 | Down | 1.52E-50  | 1.50E-49  |
| Unigene106366 | Potri.010G139600.1 | 1.6302  | 7.1301   | -2.1289 | Down | 4.41E-34  | 2.99E-33  |
| Unigene119563 | Potri.017G011400.2 | 1.2048  | 5.2698   | -2.129  | Down | 7.84E-26  | 4.21E-25  |
| Unigene29467  | Potri.005G089800.1 | 2.5478  | 11.1443  | -2.129  | Down | 7.84E-26  | 4.21E-25  |
| Unigene12867  | Potri.T122400.1    | 1.7736  | 7.7591   | -2.1292 | Down | 1.48E-17  | 6.01E-17  |
| Unigene66485  | Potri.017G012600.3 | 5.4464  | 23.8266  | -2.1292 | Down | 1.48E-17  | 6.01E-17  |
| Unigene22749  | Potri.001G008000.1 | 4.6267  | 20.2465  | -2.1296 | Down | 6.64E-41  | 5.32E-40  |
| Unigene13763  | Potri.014G194800.1 | 1.7949  | 7.8558   | -2.1299 | Down | 4.42E-17  | 1.76E-16  |
| Unigene50688  | Potri.014G046000.1 | 3.0869  | 13.5105  | -2.1299 | Down | 6.92E-25  | 3.61E-24  |
| Unigene36033  | Potri.013G115100.1 | 8.6242  | 37.7462  | -2.1299 | Down | 3.55E-79  | 5.76E-78  |
| Unigene112134 | Potri.010G119500.1 | 2.497   | 10.929   | -2.1299 | Down | 3.23E-09  | 8.81E-09  |
| Unigene54451  | Potri.007G032700.1 | 3.9919  | 17.4718  | -2.1299 | Down | 4.42E-17  | 1.76E-16  |
| Unigene104202 | Potri.006G152100.3 | 1.091   | 4.7752   | -2.1299 | Down | 3.23E-09  | 8.81E-09  |
| Unigene35413  | Potri.005G256700.4 | 5.13    | 22.4531  | -2.1299 | Down | 6.92E-25  | 3.61E-24  |
| Unigene89853  | Potri.002G204400.6 | 13.0447 | 57.0937  | -2.1299 | Down | 1.09E-63  | 1.38E-62  |
| Unigene81328  | Potri.007G065600.1 | 18.6498 | 81.6361  | -2.13   | Down | 3.21E-63  | 4.03E-62  |
| Unigene2503   | Potri.001G383600.1 | 5.4827  | 23.9995  | -2.13   | Down | 3.21E-63  | 4.04E-62  |
| Unigene2399   | Potri.017G074300.1 | 2.0868  | 9.1352   | -2.1301 | Down | 1.01E-47  | 9.45E-47  |
| Unigene12753  | Potri.018G150700.2 | 4.4505  | 19.4837  | -2.1302 | Down | 9.47E-63  | 1.18E-61  |
| Unigene33651  | Potri.017G135800.1 | 35.8248 | 156.8348 | -2.1302 | Down | 1.21E-283 | 9.87E-282 |
| Unigene29656  | Potri.009G159800.1 | 4.5452  | 19.8983  | -2.1302 | Down | 3.40E-32  | 2.20E-31  |
| Unigene75738  | Potri.004G090700.1 | 10.585  | 46.3397  | -2.1302 | Down | 3.40E-32  | 2.20E-31  |

|               |                    |         |          |         |      |           |           |
|---------------|--------------------|---------|----------|---------|------|-----------|-----------|
| Unigene99618  | Potri.016G011400.1 | 5.0088  | 21.9296  | -2.1303 | Down | 2.06E-24  | 1.06E-23  |
| Unigene9177   | Potri.008G154100.1 | 5.0376  | 22.0557  | -2.1303 | Down | 2.06E-24  | 1.06E-23  |
| Unigene90121  | Potri.005G053200.1 | 53.2566 | 233.1601 | -2.1303 | Down | 5.31E-260 | 3.87E-258 |
| Unigene4239   | Potri.001G346900.1 | 4.4158  | 19.3334  | -2.1303 | Down | 2.06E-24  | 1.06E-23  |
| Unigene33503  | Potri.009G046300.1 | 11.3869 | 49.858   | -2.1304 | Down | 2.69E-77  | 4.24E-76  |
| Unigene104485 | Potri.017G107300.1 | 1.5905  | 6.9647   | -2.1306 | Down | 1.32E-16  | 5.15E-16  |
| Unigene37907  | Potri.003G204300.9 | 3.203   | 14.0259  | -2.1306 | Down | 1.32E-16  | 5.15E-16  |
| Unigene10701  | Potri.005G159300.2 | 6.7881  | 29.734   | -2.131  | Down | 9.59E-142 | 3.18E-140 |
| Unigene29612  | Potri.002G255400.3 | 5.553   | 24.3256  | -2.1311 | Down | 4.04E-53  | 4.20E-52  |
| Unigene7903   | Potri.002G171700.1 | 8.1532  | 35.7143  | -2.1311 | Down | 1.09E-82  | 1.86E-81  |
| Unigene42549  | Potri.018G141100.2 | 11.9542 | 52.3687  | -2.1312 | Down | 1.20E-279 | 9.61E-278 |
| Unigene29206  | Potri.006G105300.1 | 4.7276  | 20.7105  | -2.1312 | Down | 1.13E-67  | 1.53E-66  |
| Unigene94911  | Potri.T014700.1    | 1.0361  | 4.5394   | -2.1313 | Down | 9.80E-09  | 2.60E-08  |
| Unigene2335   | Potri.017G101600.3 | 2.6813  | 11.7474  | -2.1313 | Down | 1.82E-23  | 9.05E-23  |
| Unigene113813 | Potri.013G075300.2 | 4.3038  | 18.8561  | -2.1313 | Down | 3.94E-16  | 1.51E-15  |
| Unigene98526  | Potri.008G147900.1 | 1.2587  | 5.5147   | -2.1313 | Down | 3.94E-16  | 1.51E-15  |
| Unigene31750  | Potri.008G129500.1 | 2.1686  | 9.5012   | -2.1313 | Down | 9.80E-09  | 2.60E-08  |
| Unigene36778  | Potri.015G004400.2 | 9.0192  | 39.5264  | -2.1317 | Down | 2.63E-30  | 1.61E-29  |
| Unigene76854  | Potri.016G081300.1 | 7.1982  | 31.5489  | -2.1319 | Down | 5.40E-23  | 2.65E-22  |
| Unigene91032  | Potri.015G116800.1 | 78.3013 | 343.2195 | -2.132  | Down | 0         | 0         |
| Unigene10431  | Potri.013G056000.1 | 1.1083  | 4.8585   | -2.1322 | Down | 1.18E-15  | 4.42E-15  |
| Unigene22282  | Potri.019G043100.1 | 1.1733  | 5.1444   | -2.1324 | Down | 1.61E-22  | 7.76E-22  |
| Unigene32578  | Potri.015G105400.1 | 2.8369  | 12.4392  | -2.1325 | Down | 1.04E-119 | 2.79E-118 |
| Unigene88957  | Potri.015G085100.1 | 55.4628 | 243.2079 | -2.1326 | Down | 1.34E-250 | 9.27E-249 |
| Unigene83685  | Potri.013G161600.4 | 19.3354 | 84.8026  | -2.1329 | Down | 3.01E-70  | 4.25E-69  |
| Unigene119165 | Potri.015G034100.1 | 0.8689  | 3.8112   | -2.133  | Down | 2.98E-08  | 7.65E-08  |
| Unigene74438  | Potri.014G024700.1 | 2.4176  | 10.6044  | -2.133  | Down | 2.98E-08  | 7.65E-08  |
| Unigene10550  | Potri.008G080200.1 | 13.3213 | 58.4326  | -2.133  | Down | 8.90E-70  | 1.25E-68  |
| Unigene35517  | Potri.007G123900.1 | 1.865   | 8.1806   | -2.133  | Down | 2.98E-08  | 7.65E-08  |
| Unigene44126  | Potri.007G115400.1 | 1.2815  | 5.621    | -2.133  | Down | 3.53E-15  | 1.29E-14  |
| Unigene29503  | Potri.001G261600.1 | 1.2187  | 5.3455   | -2.133  | Down | 3.53E-15  | 1.29E-14  |
| Unigene119241 | Potri.009G105600.1 | 0.8159  | 3.579    | -2.1331 | Down | 2.98E-08  | 7.65E-08  |
| Unigene42642  | Potri.018G113500.1 | 10.9971 | 48.2467  | -2.1333 | Down | 6.95E-49  | 6.63E-48  |
| Unigene12179  | Potri.010G109300.1 | 5.4478  | 23.9029  | -2.1334 | Down | 4.94E-62  | 6.09E-61  |
| Unigene35769  | Potri.010G149500.2 | 4.3008  | 18.871   | -2.1335 | Down | 2.04E-28  | 1.18E-27  |
| Unigene33044  | Potri.005G167300.1 | 2.4866  | 10.9109  | -2.1335 | Down | 2.04E-28  | 1.18E-27  |
| Unigene89112  | Potri.010G023800.1 | 36.7636 | 161.3182 | -2.1336 | Down | 2.04E-168 | 8.54E-167 |
| Unigene87358  | Potri.018G027700.1 | 9.7097  | 42.6091  | -2.1337 | Down | 1.34E-41  | 1.09E-40  |
| Unigene10945  | Potri.002G168400.1 | 7.8895  | 34.6225  | -2.1337 | Down | 1.25E-94  | 2.50E-93  |

|               |                    |         |          |         |      |           |           |
|---------------|--------------------|---------|----------|---------|------|-----------|-----------|
| Unigene48846  | Potri.018G051500.2 | 5.9961  | 26.3151  | -2.1338 | Down | 8.91E-35  | 6.13E-34  |
| Unigene52610  | Potri.002G084100.3 | 6.6224  | 29.0635  | -2.1338 | Down | 8.91E-35  | 6.13E-34  |
| Unigene36170  | Potri.012G095300.1 | 16.7759 | 73.6408  | -2.1341 | Down | 1.79E-47  | 1.66E-46  |
| Unigene110316 | Potri.015G006700.6 | 6.7206  | 29.5054  | -2.1343 | Down | 4.23E-21  | 1.95E-20  |
| Unigene1049   | Potri.005G165700.1 | 1.6217  | 7.1198   | -2.1343 | Down | 4.23E-21  | 1.95E-20  |
| Unigene87568  | Potri.001G248200.1 | 7.7414  | 33.9931  | -2.1346 | Down | 7.82E-34  | 5.26E-33  |
| Unigene69289  | Potri.019G064000.3 | 10.7891 | 47.3809  | -2.1347 | Down | 7.14E-53  | 7.40E-52  |
| Unigene20513  | Potri.018G006200.1 | 10.5988 | 46.5534  | -2.135  | Down | 2.11E-52  | 2.17E-51  |
| Unigene11896  | Potri.014G132600.1 | 1.9711  | 8.6578   | -2.135  | Down | 1.26E-20  | 5.73E-20  |
| Unigene11992  | Potri.013G000500.1 | 4.0074  | 17.6018  | -2.135  | Down | 4.64E-46  | 4.17E-45  |
| Unigene114142 | Potri.011G066100.1 | 1.8298  | 8.037    | -2.135  | Down | 9.06E-08  | 2.25E-07  |
| Unigene12639  | Potri.008G205600.3 | 7.0021  | 30.7555  | -2.135  | Down | 2.11E-52  | 2.17E-51  |
| Unigene42020  | Potri.002G093500.2 | 1.2595  | 5.532    | -2.135  | Down | 9.06E-08  | 2.25E-07  |
| Unigene49306  | Potri.010G160700.5 | 0.9063  | 3.981    | -2.1351 | Down | 9.06E-08  | 2.25E-07  |
| Unigene11394  | Potri.010G028200.1 | 4.77    | 20.9581  | -2.1354 | Down | 0         | 0         |
| Unigene10628  | Potri.006G027600.1 | 5.7015  | 25.0533  | -2.1356 | Down | 1.67E-181 | 7.71E-180 |
| Unigene22746  | Potri.019G064600.1 | 6.4618  | 28.3985  | -2.1358 | Down | 5.45E-51  | 5.43E-50  |
| Unigene35379  | Potri.013G122500.1 | 12.5281 | 55.0629  | -2.1359 | Down | 1.20E-44  | 1.04E-43  |
| Unigene11729  | Potri.015G028900.2 | 3.3166  | 14.5775  | -2.136  | Down | 4.64E-69  | 6.43E-68  |
| Unigene3738   | Potri.011G087600.1 | 5.4214  | 23.8308  | -2.1361 | Down | 6.37E-75  | 9.68E-74  |
| Unigene1381   | Potri.009G005900.1 | 3.3543  | 14.7442  | -2.1361 | Down | 4.69E-26  | 2.53E-25  |
| Unigene40018  | Potri.003G146000.4 | 1.4368  | 6.3157   | -2.1361 | Down | 9.47E-14  | 3.27E-13  |
| Unigene33549  | Potri.003G029700.1 | 1.4593  | 6.4145   | -2.1361 | Down | 9.47E-14  | 3.27E-13  |
| Unigene54296  | Potri.001G405500.1 | 5.2683  | 23.1576  | -2.1361 | Down | 4.69E-26  | 2.53E-25  |
| Unigene45012  | Potri.011G128800.1 | 3.1199  | 13.7152  | -2.1362 | Down | 2.18E-56  | 2.42E-55  |
| Unigene25522  | Potri.016G016900.1 | 18.7126 | 82.2647  | -2.1363 | Down | 1.88E-74  | 2.83E-73  |
| Unigene1051   | Potri.006G238900.4 | 1.5678  | 6.8928   | -2.1363 | Down | 6.03E-32  | 3.87E-31  |
| Unigene39462  | Potri.016G065900.3 | 2.1751  | 9.5634   | -2.1364 | Down | 7.90E-38  | 5.89E-37  |
| Unigene47956  | Potri.001G289800.4 | 6.1488  | 27.0337  | -2.1364 | Down | 4.04E-68  | 5.52E-67  |
| Unigene3991   | Potri.001G216600.1 | 11.3587 | 49.9421  | -2.1365 | Down | 7.90E-38  | 5.89E-37  |
| Unigene50513  | Potri.018G129800.1 | 4.331   | 19.0451  | -2.1366 | Down | 1.39E-25  | 7.42E-25  |
| Unigene21502  | Potri.004G068500.2 | 5.3458  | 23.5065  | -2.1366 | Down | 1.32E-109 | 3.17E-108 |
| Unigene9728   | Potri.003G009700.2 | 4.0979  | 18.0203  | -2.1367 | Down | 1.39E-25  | 7.42E-25  |
| Unigene401    | Potri.002G070700.1 | 21.1783 | 93.1317  | -2.1367 | Down | 4.00E-306 | 3.63E-304 |
| Unigene89083  | Potri.002G006200.3 | 27.4103 | 120.5556 | -2.1369 | Down | 3.11E-126 | 8.91E-125 |
| Unigene45192  | Potri.013G160500.1 | 3.6638  | 16.1156  | -2.137  | Down | 1.04E-66  | 1.39E-65  |
| Unigene17048  | Potri.019G010100.1 | 1.7084  | 7.5156   | -2.1372 | Down | 2.84E-13  | 9.59E-13  |
| Unigene46976  | Potri.017G150500.3 | 1.3815  | 6.0774   | -2.1372 | Down | 2.77E-07  | 6.65E-07  |
| Unigene4899   | Potri.011G004800.1 | 1.1596  | 5.1012   | -2.1372 | Down | 2.77E-07  | 6.65E-07  |

|               |                    |         |          |         |      |           |           |
|---------------|--------------------|---------|----------|---------|------|-----------|-----------|
| Unigene115555 | Potri.006G266900.1 | 1.5329  | 6.7434   | -2.1372 | Down | 2.77E-07  | 6.65E-07  |
| Unigene105098 | Potri.004G207300.6 | 1.0173  | 4.4752   | -2.1372 | Down | 2.77E-07  | 6.65E-07  |
| Unigene20228  | Potri.T136800.1    | 1.2644  | 5.5624   | -2.1373 | Down | 2.77E-07  | 6.65E-07  |
| Unigene103279 | Potri.018G057100.1 | 0.9267  | 4.0768   | -2.1373 | Down | 2.77E-07  | 6.65E-07  |
| Unigene20310  | Potri.008G101300.1 | 1.576   | 6.9334   | -2.1373 | Down | 2.77E-07  | 6.65E-07  |
| Unigene9647   | Potri.006G279400.4 | 1.6516  | 7.266    | -2.1373 | Down | 2.77E-07  | 6.65E-07  |
| Unigene29759  | Potri.004G223800.1 | 25.5207 | 112.2718 | -2.1373 | Down | 5.78E-78  | 9.18E-77  |
| Unigene1613   | Potri.001G081900.1 | 6.4293  | 28.2883  | -2.1375 | Down | 9.06E-66  | 1.19E-64  |
| Unigene78904  | Potri.008G040000.1 | 20.2885 | 89.2818  | -2.1377 | Down | 2.68E-65  | 3.49E-64  |
| Unigene3606   | Potri.016G068000.1 | 13.9773 | 61.5255  | -2.1381 | Down | 2.46E-87  | 4.45E-86  |
| Unigene58201  | Potri.015G125400.1 | 3.8624  | 17.0014  | -2.1381 | Down | 9.93E-19  | 4.22E-18  |
| Unigene10876  | Potri.007G112300.2 | 6.9728  | 30.692   | -2.1381 | Down | 1.73E-144 | 5.90E-143 |
| Unigene28655  | Potri.006G240200.1 | 2.0888  | 9.1944   | -2.1381 | Down | 9.93E-19  | 4.22E-18  |
| Unigene33992  | Potri.017G136000.1 | 17.5131 | 77.1048  | -2.1384 | Down | 1.68E-103 | 3.73E-102 |
| Unigene74400  | Potri.016G004900.2 | 11.9706 | 52.708   | -2.1385 | Down | 1.80E-35  | 1.26E-34  |
| Unigene18191  | Potri.004G082900.2 | 8.7391  | 38.4796  | -2.1385 | Down | 2.78E-69  | 3.86E-68  |
| Unigene39877  | Potri.002G048000.1 | 5.0365  | 22.1766  | -2.1385 | Down | 1.80E-35  | 1.26E-34  |
| Unigene24408  | Potri.003G053200.3 | 1.9409  | 8.5462   | -2.1386 | Down | 8.52E-13  | 2.81E-12  |
| Unigene47798  | Potri.017G112900.1 | 27.746  | 122.1981 | -2.1389 | Down | 2.39E-135 | 7.48E-134 |
| Unigene31950  | Potri.018G003100.1 | 19.1885 | 84.5229  | -2.1391 | Down | 2.91E-228 | 1.77E-226 |
| Unigene92188  | Potri.011G119500.6 | 16.4605 | 72.5081  | -2.1391 | Down | 3.74E-101 | 8.11E-100 |
| Unigene31909  | Potri.018G138000.2 | 3.1733  | 13.9794  | -2.1392 | Down | 2.58E-117 | 6.75E-116 |
| Unigene74554  | Potri.010G235700.1 | 9.6703  | 42.6038  | -2.1393 | Down | 4.10E-29  | 2.43E-28  |
| Unigene82856  | Potri.009G125600.1 | 7.912   | 34.8576  | -2.1394 | Down | 4.10E-29  | 2.43E-28  |
| Unigene34999  | Potri.003G164000.1 | 2.5976  | 11.4456  | -2.1395 | Down | 6.16E-40  | 4.82E-39  |
| Unigene88674  | Potri.001G177000.4 | 55.2872 | 243.6079 | -2.1395 | Down | 5.68E-247 | 3.84E-245 |
| Unigene24656  | Potri.006G004300.1 | 22.8155 | 100.5321 | -2.1396 | Down | 5.73E-89  | 1.06E-87  |
| Unigene23646  | Potri.018G119100.1 | 2.0737  | 9.1396   | -2.1399 | Down | 1.82E-39  | 1.41E-38  |
| Unigene40721  | Potri.018G037500.2 | 1.3257  | 5.8428   | -2.1399 | Down | 2.56E-12  | 8.25E-12  |
| Unigene119037 | Potri.017G118100.1 | 0.7406  | 3.2641   | -2.1399 | Down | 8.47E-07  | 1.96E-06  |
| Unigene42075  | Potri.016G067300.1 | 1.0309  | 4.5436   | -2.1399 | Down | 8.47E-07  | 1.96E-06  |
| Unigene29678  | Potri.014G133000.3 | 9.3553  | 41.2324  | -2.1399 | Down | 1.82E-39  | 1.41E-38  |
| Unigene41554  | Potri.010G101500.1 | 1.1119  | 4.9006   | -2.1399 | Down | 8.47E-07  | 1.96E-06  |
| Unigene31538  | Potri.006G043800.1 | 3.218   | 14.183   | -2.1399 | Down | 2.56E-12  | 8.25E-12  |
| Unigene41740  | Potri.004G001800.1 | 13.6117 | 59.9921  | -2.1399 | Down | 3.01E-77  | 4.74E-76  |
| Unigene79086  | Potri.003G120300.2 | 5.1287  | 22.6042  | -2.1399 | Down | 8.84E-18  | 3.62E-17  |
| Unigene3450   | Potri.002G004100.2 | 4.2739  | 18.8368  | -2.1399 | Down | 8.84E-18  | 3.62E-17  |
| Unigene98675  | Potri.017G094100.4 | 1.4246  | 6.2789   | -2.14   | Down | 8.47E-07  | 1.96E-06  |
| Unigene20672  | Potri.009G023600.1 | 1.2358  | 5.4468   | -2.14   | Down | 8.47E-07  | 1.96E-06  |

|               |                    |         |          |         |      |           |           |
|---------------|--------------------|---------|----------|---------|------|-----------|-----------|
| Unigene112374 | Potri.001G103400.2 | 1.6954  | 7.4725   | -2.14   | Down | 8.47E-07  | 1.96E-06  |
| Unigene83976  | Potri.001G074700.1 | 1.4974  | 6.5998   | -2.14   | Down | 8.47E-07  | 1.96E-06  |
| Unigene22961  | Potri.002G065500.1 | 6.431   | 28.349   | -2.1402 | Down | 1.35E-60  | 1.62E-59  |
| Unigene3009   | Potri.009G123400.3 | 8.5004  | 37.4744  | -2.1403 | Down | 2.48E-124 | 6.97E-123 |
| Unigene54307  | Potri.006G038400.1 | 10.629  | 46.8616  | -2.1404 | Down | 1.24E-134 | 3.86E-133 |
| Unigene13337  | Potri.002G105300.1 | 2.1064  | 9.2869   | -2.1404 | Down | 1.39E-33  | 9.26E-33  |
| Unigene17386  | Potri.010G074800.6 | 13.5349 | 59.6844  | -2.1407 | Down | 3.77E-86  | 6.73E-85  |
| Unigene84607  | Potri.002G172800.1 | 17.1844 | 75.7778  | -2.1407 | Down | 4.73E-65  | 6.14E-64  |
| Unigene45119  | Potri.001G309100.2 | 6.6037  | 29.1208  | -2.1407 | Down | 5.40E-144 | 1.83E-142 |
| Unigene88516  | Potri.001G257000.4 | 13.1383 | 57.9387  | -2.1407 | Down | 1.17E-59  | 1.39E-58  |
| Unigene22543  | Potri.002G106600.1 | 2.3528  | 10.3758  | -2.1408 | Down | 1.60E-38  | 1.21E-37  |
| Unigene77447  | Potri.009G060800.1 | 22.4443 | 98.9843  | -2.1409 | Down | 5.63E-70  | 7.91E-69  |
| Unigene119090 | Potri.015G104600.1 | 2.083   | 9.1872   | -2.141  | Down | 2.64E-17  | 1.06E-16  |
| Unigene25453  | Potri.004G111400.1 | 30.7327 | 135.5543 | -2.141  | Down | 1.34E-116 | 3.49E-115 |
| Unigene16095  | Potri.010G064900.3 | 31.083  | 137.1099 | -2.1411 | Down | 8.12E-132 | 2.46E-130 |
| Unigene107282 | Potri.016G064100.1 | 3.9165  | 17.2796  | -2.1414 | Down | 7.69E-12  | 2.42E-11  |
| Unigene95184  | Potri.002G066200.1 | 3.4355  | 15.1576  | -2.1414 | Down | 7.69E-12  | 2.42E-11  |
| Unigene29285  | Potri.002G056600.2 | 4.0376  | 17.8141  | -2.1414 | Down | 2.85E-22  | 1.37E-21  |
| Unigene33215  | Potri.019G076300.1 | 1.8216  | 8.037    | -2.1415 | Down | 7.69E-12  | 2.42E-11  |
| Unigene17453  | Potri.015G037800.1 | 1.615   | 7.1256   | -2.1415 | Down | 7.69E-12  | 2.42E-11  |
| Unigene40272  | Potri.001G164100.1 | 8.2888  | 36.5707  | -2.1415 | Down | 5.49E-43  | 4.61E-42  |
| Unigene33907  | Potri.016G022800.2 | 4.064   | 17.9334  | -2.1417 | Down | 1.40E-37  | 1.04E-36  |
| Unigene32547  | Potri.014G154400.1 | 16.9297 | 74.7133  | -2.1418 | Down | 2.09E-185 | 9.92E-184 |
| Unigene34878  | Potri.005G112600.1 | 2.4124  | 10.6461  | -2.1418 | Down | 7.56E-53  | 7.82E-52  |
| Unigene118913 | Potri.004G228700.1 | 2.2194  | 9.7956   | -2.142  | Down | 7.87E-17  | 3.10E-16  |
| Unigene108710 | Potri.004G173900.1 | 22.1299 | 97.675   | -2.142  | Down | 1.06E-62  | 1.32E-61  |
| Unigene32748  | Potri.012G090800.1 | 7.9619  | 35.1504  | -2.1424 | Down | 2.00E-137 | 6.42E-136 |
| Unigene5261   | Potri.002G179800.1 | 11.3909 | 50.2917  | -2.1424 | Down | 6.60E-52  | 6.71E-51  |
| Unigene34769  | Potri.001G056200.3 | 4.063   | 17.9398  | -2.1425 | Down | 9.24E-62  | 1.13E-60  |
| Unigene39755  | Potri.018G029200.1 | 4.1846  | 18.4785  | -2.1427 | Down | 1.42E-41  | 1.16E-40  |
| Unigene104807 | Potri.T076500.1    | 0.9419  | 4.1606   | -2.1431 | Down | 2.60E-06  | 5.79E-06  |
| Unigene15282  | Potri.017G057700.4 | 2.8365  | 12.5292  | -2.1431 | Down | 2.31E-11  | 7.12E-11  |
| Unigene27991  | Potri.016G118000.1 | 6.1398  | 27.1209  | -2.1431 | Down | 4.21E-41  | 3.39E-40  |
| Unigene68161  | Potri.012G027600.1 | 2.5813  | 11.402   | -2.1431 | Down | 2.31E-11  | 7.12E-11  |
| Unigene106941 | Potri.008G196400.1 | 0.7755  | 3.4254   | -2.1431 | Down | 2.60E-06  | 5.79E-06  |
| Unigene12683  | Potri.008G159800.1 | 12.3583 | 54.5889  | -2.1431 | Down | 4.25E-164 | 1.72E-162 |
| Unigene32668  | Potri.005G179500.4 | 3.3483  | 14.7899  | -2.1431 | Down | 2.80E-26  | 1.52E-25  |
| Unigene118448 | Potri.003G062700.1 | 0.842   | 3.7192   | -2.1431 | Down | 2.60E-06  | 5.79E-06  |
| Unigene26580  | Potri.002G107700.2 | 3.0449  | 13.4497  | -2.1431 | Down | 2.31E-11  | 7.12E-11  |

|               |                    |         |          |         |      |           |           |
|---------------|--------------------|---------|----------|---------|------|-----------|-----------|
| Unigene106711 | Potri.T108700.1    | 1.1418  | 5.0437   | -2.1432 | Down | 2.35E-16  | 9.09E-16  |
| Unigene46     | Potri.017G108100.1 | 5.6421  | 24.9241  | -2.1432 | Down | 1.25E-163 | 5.05E-162 |
| Unigene113285 | Potri.015G096300.1 | 1.4801  | 6.5381   | -2.1432 | Down | 2.60E-06  | 5.79E-06  |
| Unigene21835  | Potri.001G413000.1 | 2.4555  | 10.8466  | -2.1432 | Down | 5.76E-51  | 5.74E-50  |
| Unigene115355 | Potri.001G191300.1 | 1.2996  | 5.7407   | -2.1432 | Down | 2.60E-06  | 5.79E-06  |
| Unigene11238  | Potri.001G146400.1 | 8.2755  | 36.5672  | -2.1436 | Down | 9.95E-70  | 1.39E-68  |
| Unigene4435   | Potri.016G051900.2 | 5.0488  | 22.3128  | -2.1439 | Down | 8.32E-26  | 4.46E-25  |
| Unigene31217  | Potri.018G086000.2 | 16.8496 | 74.4745  | -2.144  | Down | 4.80E-117 | 1.25E-115 |
| Unigene65594  | Potri.010G176000.4 | 5.4687  | 24.1716  | -2.144  | Down | 7.52E-21  | 3.44E-20  |
| Unigene48118  | Potri.002G149500.1 | 15.3664 | 67.9187  | -2.144  | Down | 2.07E-59  | 2.44E-58  |
| Unigene44633  | Potri.001G228100.1 | 6.1814  | 27.3214  | -2.144  | Down | 2.07E-59  | 2.44E-58  |
| Unigene10995  | Potri.001G230600.1 | 6.3126  | 27.9021  | -2.1441 | Down | 2.52E-131 | 7.60E-130 |
| Unigene48294  | Potri.016G007500.1 | 7.0651  | 31.2303  | -2.1442 | Down | 3.19E-35  | 2.22E-34  |
| Unigene66164  | Potri.009G052600.1 | 8.8375  | 39.0651  | -2.1442 | Down | 3.19E-35  | 2.22E-34  |
| Unigene66916  | Potri.007G128300.1 | 7.6897  | 33.9955  | -2.1443 | Down | 1.27E-44  | 1.10E-43  |
| Unigene27446  | Potri.007G038100.2 | 2.9799  | 13.1737  | -2.1443 | Down | 7.03E-16  | 2.66E-15  |
| Unigene11479  | Potri.001G230100.2 | 9.8246  | 43.4336  | -2.1443 | Down | 1.16E-144 | 3.94E-143 |
| Unigene1267   | Potri.016G138000.1 | 1.385   | 6.123    | -2.1444 | Down | 7.03E-16  | 2.66E-15  |
| Unigene5706   | Potri.015G041600.1 | 35.0252 | 154.8601 | -2.1445 | Down | 1.49E-153 | 5.49E-152 |
| Unigene32742  | Potri.014G168600.1 | 7.6317  | 33.7428  | -2.1445 | Down | 1.23E-115 | 3.16E-114 |
| Unigene43145  | Potri.007G140800.1 | 1.9314  | 8.5397   | -2.1445 | Down | 1.09E-39  | 8.48E-39  |
| Unigene87026  | Potri.008G124700.1 | 35.7354 | 158.0186 | -2.1447 | Down | 3.60E-148 | 1.27E-146 |
| Unigene21795  | Potri.006G043100.1 | 4.2665  | 18.8659  | -2.1447 | Down | 3.81E-82  | 6.43E-81  |
| Unigene45485  | Potri.004G115800.1 | 3.7041  | 16.3803  | -2.1448 | Down | 3.75E-44  | 3.23E-43  |
| Unigene42853  | Potri.001G456300.1 | 7.434   | 32.8746  | -2.1448 | Down | 1.35E-86  | 2.42E-85  |
| Unigene51353  | Potri.016G069000.1 | 8.1459  | 36.0281  | -2.145  | Down | 8.26E-30  | 4.99E-29  |
| Unigene22803  | Potri.010G252100.2 | 3.0547  | 13.5105  | -2.145  | Down | 8.26E-30  | 4.99E-29  |
| Unigene42569  | Potri.005G250700.1 | 8.7493  | 38.6969  | -2.145  | Down | 4.11E-189 | 2.00E-187 |
| Unigene53686  | Potri.002G260100.2 | 5.8089  | 25.6922  | -2.145  | Down | 2.24E-20  | 1.01E-19  |
| Unigene51559  | Potri.002G112100.5 | 1.2219  | 5.4042   | -2.145  | Down | 6.97E-11  | 2.09E-10  |
| Unigene91323  | Potri.005G144800.1 | 19.4567 | 86.0698  | -2.1452 | Down | 7.67E-109 | 1.82E-107 |
| Unigene48328  | Potri.019G019700.1 | 19.9738 | 88.3585  | -2.1453 | Down | 5.13E-132 | 1.56E-130 |
| Unigene18961  | Potri.003G116200.1 | 3.0973  | 13.7027  | -2.1454 | Down | 7.34E-25  | 3.82E-24  |
| Unigene92932  | Potri.005G137700.1 | 20.2339 | 89.5246  | -2.1455 | Down | 1.93E-140 | 6.35E-139 |
| Unigene51692  | Potri.007G116300.2 | 1.5336  | 6.786    | -2.1456 | Down | 2.10E-15  | 7.79E-15  |
| Unigene87466  | Potri.015G017200.2 | 6.61    | 29.2487  | -2.1457 | Down | 2.45E-29  | 1.46E-28  |
| Unigene31573  | Potri.018G001900.1 | 12.7064 | 56.2298  | -2.1458 | Down | 1.14E-47  | 1.06E-46  |
| Unigene5502   | Potri.014G197300.1 | 16.4034 | 72.6035  | -2.146  | Down | 2.51E-79  | 4.09E-78  |
| Unigene50461  | Potri.005G114800.1 | 21.4755 | 95.0593  | -2.1461 | Down | 6.70E-152 | 2.44E-150 |

|               |                    |         |          |         |      |           |           |
|---------------|--------------------|---------|----------|---------|------|-----------|-----------|
| Unigene1285   | Potri.018G001900.1 | 8.9364  | 39.5573  | -2.1462 | Down | 5.95E-70  | 8.35E-69  |
| Unigene44464  | Potri.014G156400.1 | 2.1182  | 9.3765   | -2.1462 | Down | 2.18E-24  | 1.12E-23  |
| Unigene32098  | Potri.014G099700.1 | 5.523   | 24.4495  | -2.1463 | Down | 5.03E-106 | 1.15E-104 |
| Unigene21482  | Potri.016G084900.1 | 7.5041  | 33.2247  | -2.1465 | Down | 1.60E-186 | 7.67E-185 |
| Unigene9342   | Potri.012G039200.1 | 31.5434 | 139.656  | -2.1465 | Down | 9.11E-205 | 4.86E-203 |
| Unigene27813  | Potri.006G189300.1 | 14.5998 | 64.6411  | -2.1465 | Down | 6.19E-74  | 9.24E-73  |
| Unigene54222  | Potri.017G012800.2 | 15.3586 | 68.0057  | -2.1466 | Down | 9.92E-47  | 9.05E-46  |
| Unigene33232  | Potri.009G004200.1 | 8.539   | 37.8095  | -2.1466 | Down | 9.72E-92  | 1.86E-90  |
| Unigene16379  | Potri.018G086800.3 | 1.5687  | 6.9479   | -2.147  | Down | 8.02E-06  | 1.71E-05  |
| Unigene119471 | Potri.010G245300.1 | 1.189   | 5.2663   | -2.147  | Down | 6.29E-15  | 2.28E-14  |
| Unigene63062  | Potri.010G204000.1 | 1.4724  | 6.5213   | -2.147  | Down | 8.02E-06  | 1.71E-05  |
| Unigene53003  | Potri.008G067400.6 | 1.5687  | 6.9479   | -2.147  | Down | 8.02E-06  | 1.71E-05  |
| Unigene36301  | Potri.008G036300.3 | 3.2592  | 14.4355  | -2.147  | Down | 2.10E-10  | 6.13E-10  |
| Unigene51425  | Potri.006G135100.1 | 1.0021  | 4.4384   | -2.147  | Down | 2.10E-10  | 6.13E-10  |
| Unigene1882   | Potri.003G223800.1 | 1.1556  | 5.1183   | -2.147  | Down | 2.10E-10  | 6.13E-10  |
| Unigene37106  | Potri.002G038700.1 | 0.8976  | 3.9755   | -2.147  | Down | 8.02E-06  | 1.71E-05  |
| Unigene118428 | Potri.014G068300.1 | 0.7629  | 3.3792   | -2.1471 | Down | 8.02E-06  | 1.71E-05  |
| Unigene119081 | Potri.013G144800.1 | 1.1758  | 5.2079   | -2.1471 | Down | 2.10E-10  | 6.13E-10  |
| Unigene104064 | Potri.011G022900.1 | 1.5121  | 6.6975   | -2.1471 | Down | 8.02E-06  | 1.71E-05  |
| Unigene102583 | Potri.008G014400.1 | 2.6502  | 11.7383  | -2.1471 | Down | 6.29E-15  | 2.28E-14  |
| Unigene117830 | Potri.005G145800.1 | 0.8674  | 3.842    | -2.1471 | Down | 8.02E-06  | 1.71E-05  |
| Unigene10907  | Potri.019G025500.1 | 1.4563  | 6.4529   | -2.1476 | Down | 2.15E-32  | 1.40E-31  |
| Unigene11451  | Potri.001G276900.1 | 3.4984  | 15.5008  | -2.1476 | Down | 7.33E-37  | 5.34E-36  |
| Unigene89718  | Potri.003G204300.3 | 22.7713 | 100.907  | -2.1477 | Down | 3.64E-111 | 8.91E-110 |
| Unigene34919  | Potri.T044200.3    | 2.6741  | 11.8506  | -2.1478 | Down | 8.89E-50  | 8.64E-49  |
| Unigene7172   | Potri.019G048700.7 | 5.3719  | 23.8054  | -2.1478 | Down | 6.40E-28  | 3.66E-27  |
| Unigene79538  | Potri.019G010200.1 | 8.1353  | 36.0509  | -2.1478 | Down | 6.40E-28  | 3.66E-27  |
| Unigene9698   | Potri.004G164000.1 | 6.2166  | 27.5512  | -2.1479 | Down | 1.93E-23  | 9.59E-23  |
| Unigene74199  | Potri.001G110300.1 | 7.6334  | 33.8303  | -2.1479 | Down | 1.93E-23  | 9.59E-23  |
| Unigene43203  | Potri.016G059900.1 | 2.7307  | 12.1024  | -2.148  | Down | 2.56E-45  | 2.27E-44  |
| Unigene16601  | Potri.011G126200.3 | 12.2008 | 54.081   | -2.1481 | Down | 9.14E-54  | 9.64E-53  |
| Unigene1432   | Potri.005G071900.3 | 9.6421  | 42.7366  | -2.1481 | Down | 3.19E-58  | 3.68E-57  |
| Unigene9963   | Potri.002G236200.1 | 42.8028 | 189.7269 | -2.1481 | Down | 7.17E-279 | 5.70E-277 |
| Unigene38700  | Potri.011G077500.1 | 3.1457  | 13.9438  | -2.1482 | Down | 5.92E-19  | 2.54E-18  |
| Unigene81917  | Potri.019G068400.1 | 26.4145 | 117.1156 | -2.1485 | Down | 5.81E-92  | 1.12E-90  |
| Unigene119402 | Potri.017G088500.1 | 1.3088  | 5.8027   | -2.1485 | Down | 1.88E-14  | 6.70E-14  |
| Unigene25064  | Potri.014G084500.1 | 1.1784  | 5.2246   | -2.1485 | Down | 1.88E-14  | 6.70E-14  |
| Unigene47760  | Potri.003G097700.1 | 17.1882 | 76.2133  | -2.1486 | Down | 1.25E-74  | 1.90E-73  |
| Unigene62453  | Potri.015G040100.1 | 6.5465  | 29.0318  | -2.1488 | Down | 5.73E-23  | 2.81E-22  |



|               |                    |         |          |         |      |           |           |
|---------------|--------------------|---------|----------|---------|------|-----------|-----------|
| Unigene12425  | Potri.010G129800.4 | 18.4286 | 81.7205  | -2.1488 | Down | 1.14E-125 | 3.24E-124 |
| Unigene21637  | Potri.003G155200.1 | 4.2028  | 18.6399  | -2.149  | Down | 2.88E-61  | 3.50E-60  |
| Unigene12327  | Potri.005G216300.3 | 5.8534  | 25.9627  | -2.1491 | Down | 2.30E-48  | 2.17E-47  |
| Unigene31778  | Potri.019G047600.2 | 5.8938  | 26.1461  | -2.1493 | Down | 4.05E-246 | 2.73E-244 |
| Unigene25263  | Potri.010G254200.1 | 12.6397 | 56.0724  | -2.1493 | Down | 2.36E-52  | 2.42E-51  |
| Unigene44253  | Potri.002G229100.2 | 4.9442  | 21.9334  | -2.1493 | Down | 1.90E-35  | 1.33E-34  |
| Unigene7377   | Potri.002G086500.1 | 1.6053  | 7.1214   | -2.1493 | Down | 6.35E-10  | 1.80E-09  |
| Unigene18201  | Potri.017G109600.1 | 2.1715  | 9.6334   | -2.1494 | Down | 1.77E-18  | 7.43E-18  |
| Unigene43132  | Potri.019G084800.2 | 3.3769  | 14.9826  | -2.1495 | Down | 2.43E-56  | 2.70E-55  |
| Unigene12020  | Potri.008G073500.2 | 3.8779  | 17.2065  | -2.1496 | Down | 1.93E-39  | 1.49E-38  |
| Unigene49888  | Potri.008G062400.1 | 4.7649  | 21.1414  | -2.1496 | Down | 6.78E-48  | 6.35E-47  |
| Unigene74473  | Potri.003G038700.1 | 10.1883 | 45.2084  | -2.1497 | Down | 5.61E-31  | 3.50E-30  |
| Unigene15441  | Potri.001G455000.1 | 14.7735 | 65.557   | -2.1497 | Down | 6.97E-52  | 7.07E-51  |
| Unigene43987  | Potri.003G051600.4 | 1.3413  | 5.9521   | -2.1498 | Down | 1.70E-22  | 8.22E-22  |
| Unigene46332  | Potri.001G405600.1 | 1.9012  | 8.4369   | -2.1498 | Down | 1.70E-22  | 8.22E-22  |
| Unigene10882  | Potri.001G011000.2 | 12.9291 | 57.3759  | -2.1498 | Down | 7.84E-127 | 2.26E-125 |
| Unigene64471  | Potri.010G199300.3 | 5.4446  | 24.1637  | -2.1499 | Down | 5.63E-35  | 3.90E-34  |
| Unigene2354   | Potri.010G123500.2 | 2.1656  | 9.611    | -2.1499 | Down | 5.63E-35  | 3.90E-34  |
| Unigene29742  | Potri.003G131300.4 | 21.9556 | 97.439   | -2.1499 | Down | 3.82E-89  | 7.08E-88  |
| Unigene53999  | Potri.001G064600.4 | 13.6462 | 60.5718  | -2.1501 | Down | 5.70E-39  | 4.36E-38  |
| Unigene2156   | Potri.T130000.1    | 17.363  | 77.0714  | -2.1502 | Down | 3.26E-266 | 2.45E-264 |
| Unigene33226  | Potri.013G071900.1 | 4.2579  | 18.8999  | -2.1502 | Down | 5.70E-39  | 4.36E-38  |
| Unigene40580  | Potri.004G209000.1 | 8.0042  | 35.5286  | -2.1502 | Down | 1.67E-26  | 9.16E-26  |
| Unigene28913  | Potri.016G004300.1 | 3.8698  | 17.1792  | -2.1503 | Down | 5.80E-43  | 4.87E-42  |
| Unigene78589  | Potri.015G078500.2 | 13.0078 | 57.7451  | -2.1503 | Down | 5.80E-43  | 4.87E-42  |
| Unigene30760  | Potri.014G115200.2 | 10.0515 | 44.6212  | -2.1503 | Down | 5.80E-43  | 4.87E-42  |
| Unigene16660  | Potri.001G460400.1 | 21.5221 | 95.5379  | -2.1503 | Down | 7.56E-134 | 2.34E-132 |
| Unigene55203  | Potri.001G129000.1 | 6.2166  | 27.5971  | -2.1503 | Down | 5.80E-43  | 4.87E-42  |
| Unigene48978  | Potri.015G014800.2 | 11.4768 | 50.9601  | -2.1506 | Down | 2.44E-71  | 3.51E-70  |
| Unigene4627   | Potri.004G040000.2 | 5.1936  | 23.0599  | -2.1506 | Down | 5.27E-18  | 2.18E-17  |
| Unigene32350  | Potri.006G210900.1 | 13.2761 | 58.9534  | -2.1507 | Down | 1.63E-189 | 7.98E-188 |
| Unigene18627  | Potri.001G448900.1 | 8.1106  | 36.0194  | -2.1509 | Down | 2.89E-87  | 5.22E-86  |
| Unigene77     | Potri.016G003800.1 | 8.844   | 39.28    | -2.151  | Down | 1.68E-200 | 8.78E-199 |
| Unigene5197   | Potri.019G080300.2 | 6.535   | 29.0287  | -2.1512 | Down | 4.94E-34  | 3.34E-33  |
| Unigene1147   | Potri.016G053300.2 | 5.4385  | 24.163   | -2.1515 | Down | 5.64E-58  | 6.46E-57  |
| Unigene34426  | Potri.003G223400.1 | 15.8977 | 70.6306  | -2.1515 | Down | 1.04E-258 | 7.49E-257 |
| Unigene87465  | Potri.T125700.2    | 23.7253 | 105.4226 | -2.1517 | Down | 8.90E-102 | 1.95E-100 |
| Unigene106787 | Potri.005G155600.1 | 0.6956  | 3.0912   | -2.1518 | Down | 2.49E-05  | 5.07E-05  |
| Unigene117942 | Potri.004G137600.2 | 0.7574  | 3.3658   | -2.1518 | Down | 2.49E-05  | 5.07E-05  |

|               |                    |         |          |         |      |           |           |
|---------------|--------------------|---------|----------|---------|------|-----------|-----------|
| Unigene5122   | Potri.001G416300.1 | 0.87    | 3.8662   | -2.1518 | Down | 2.49E-05  | 5.07E-05  |
| Unigene31125  | Potri.T059200.1    | 1.0753  | 4.7788   | -2.1519 | Down | 1.92E-09  | 5.31E-09  |
| Unigene35666  | Potri.016G024600.1 | 0.9595  | 4.264    | -2.1519 | Down | 2.49E-05  | 5.07E-05  |
| Unigene117673 | Potri.016G010700.1 | 0.7936  | 3.5269   | -2.1519 | Down | 2.49E-05  | 5.07E-05  |
| Unigene101682 | Potri.015G074900.3 | 1.0081  | 4.4801   | -2.1519 | Down | 2.49E-05  | 5.07E-05  |
| Unigene33773  | Potri.013G057700.1 | 3.0826  | 13.6995  | -2.1519 | Down | 1.51E-21  | 7.06E-21  |
| Unigene22828  | Potri.009G001500.2 | 1.1656  | 5.1801   | -2.1519 | Down | 1.92E-09  | 5.31E-09  |
| Unigene77599  | Potri.007G004100.1 | 2.5724  | 11.432   | -2.1519 | Down | 1.92E-09  | 5.31E-09  |
| Unigene12387  | Potri.005G082000.1 | 1.2974  | 5.7657   | -2.1519 | Down | 1.92E-09  | 5.31E-09  |
| Unigene37495  | Potri.005G022600.1 | 1.2081  | 5.3689   | -2.1519 | Down | 2.49E-05  | 5.07E-05  |
| Unigene40269  | Potri.002G260600.2 | 2.2954  | 10.2009  | -2.1519 | Down | 1.51E-21  | 7.06E-21  |
| Unigene51903  | Potri.002G178200.1 | 7.1047  | 31.5741  | -2.1519 | Down | 1.47E-25  | 7.84E-25  |
| Unigene73958  | Potri.002G076000.1 | 15.4101 | 68.4846  | -2.1519 | Down | 1.53E-45  | 1.36E-44  |
| Unigene94603  | Potri.009G063800.1 | 1.0772  | 4.7874   | -2.152  | Down | 2.49E-05  | 5.07E-05  |
| Unigene77709  | Potri.010G154000.1 | 40.9974 | 182.2191 | -2.1521 | Down | 1.10E-128 | 3.21E-127 |
| Unigene85188  | Potri.006G039000.2 | 34.2999 | 152.4509 | -2.1521 | Down | 1.15E-132 | 3.53E-131 |
| Unigene33890  | Potri.010G177200.4 | 10.6143 | 47.1914  | -2.1525 | Down | 1.68E-72  | 2.45E-71  |
| Unigene44619  | Potri.001G373100.1 | 2.8664  | 12.7436  | -2.1525 | Down | 4.44E-41  | 3.57E-40  |
| Unigene12419  | Potri.009G134300.8 | 3.6221  | 16.1073  | -2.1528 | Down | 4.38E-25  | 2.30E-24  |
| Unigene46245  | Potri.018G030300.1 | 25.2976 | 112.5031 | -2.1529 | Down | 4.27E-177 | 1.90E-175 |
| Unigene10745  | Potri.018G097600.1 | 7.3364  | 32.6297  | -2.153  | Down | 2.85E-250 | 1.96E-248 |
| Unigene13361  | Potri.005G137500.1 | 4.0074  | 17.8232  | -2.153  | Down | 1.31E-40  | 1.04E-39  |
| Unigene104079 | Potri.015G079400.2 | 0.8629  | 3.8386   | -2.1533 | Down | 4.69E-17  | 1.87E-16  |
| Unigene6067   | Potri.010G138600.3 | 10.1429 | 45.1202  | -2.1533 | Down | 1.29E-32  | 8.39E-32  |
| Unigene52900  | Potri.008G204800.1 | 7.8392  | 34.8726  | -2.1533 | Down | 1.29E-32  | 8.39E-32  |
| Unigene10355  | Potri.006G208900.2 | 4.2511  | 18.9107  | -2.1533 | Down | 4.69E-17  | 1.87E-16  |
| Unigene46628  | Potri.005G080100.2 | 2.5638  | 11.4051  | -2.1533 | Down | 4.69E-17  | 1.87E-16  |
| Unigene79009  | Potri.001G450100.3 | 8.3924  | 37.3388  | -2.1535 | Down | 1.29E-28  | 7.50E-28  |
| Unigene11889  | Potri.T012200.3    | 8.4491  | 37.595   | -2.1537 | Down | 3.99E-63  | 5.02E-62  |
| Unigene20560  | Potri.018G014900.1 | 1.1113  | 4.9451   | -2.1538 | Down | 5.07E-13  | 1.69E-12  |
| Unigene43853  | Potri.015G131800.1 | 2.2938  | 10.2075  | -2.1538 | Down | 1.30E-24  | 6.72E-24  |
| Unigene44250  | Potri.002G026700.2 | 19.0258 | 84.6644  | -2.1538 | Down | 5.69E-128 | 1.65E-126 |
| Unigene46357  | Potri.016G084400.2 | 23.5386 | 104.7546 | -2.1539 | Down | 1.22E-66  | 1.63E-65  |
| Unigene10772  | Potri.001G233800.7 | 6.9519  | 30.9383  | -2.1539 | Down | 1.76E-131 | 5.32E-130 |
| Unigene37631  | Potri.001G056100.1 | 27.353  | 121.7277 | -2.1539 | Down | 1.36E-89  | 2.54E-88  |
| Unigene18126  | Potri.008G197000.1 | 20.3493 | 90.5754  | -2.1541 | Down | 1.03E-225 | 6.21E-224 |
| Unigene69530  | Potri.019G000200.1 | 3.7104  | 16.5159  | -2.1542 | Down | 1.34E-20  | 6.06E-20  |
| Unigene52176  | Potri.017G023500.1 | 2.6007  | 11.5763  | -2.1542 | Down | 1.34E-20  | 6.07E-20  |
| Unigene111563 | Potri.007G118300.2 | 6.0572  | 26.9619  | -2.1542 | Down | 1.34E-20  | 6.07E-20  |

|               |                     |         |          |         |      |           |           |
|---------------|---------------------|---------|----------|---------|------|-----------|-----------|
| Unigene47432  | Potri.012G116500.1  | 22.8559 | 101.7455 | -2.1543 | Down | 1.64E-145 | 5.65E-144 |
| Unigene22219  | Potri.019G075900.3  | 2.01    | 8.9482   | -2.1544 | Down | 1.10E-54  | 1.19E-53  |
| Unigene46813  | Potri.011G002400.1  | 8.2684  | 36.8199  | -2.1548 | Down | 1.05E-46  | 9.53E-46  |
| Unigene6761   | Potri.010G074300.1  | 2.3459  | 10.4465  | -2.1548 | Down | 1.40E-16  | 5.46E-16  |
| Unigene42281  | Potri.008G136500.1  | 11.2801 | 50.2315  | -2.1548 | Down | 3.40E-39  | 2.62E-38  |
| Unigene118625 | Potri.007G033000.1  | 1.2084  | 5.3812   | -2.1548 | Down | 5.82E-09  | 1.56E-08  |
| Unigene102653 | Potri.006G186600.1  | 1.2517  | 5.5738   | -2.1548 | Down | 1.40E-16  | 5.46E-16  |
| Unigene30888  | Potri.006G040600.3  | 2.5146  | 11.1977  | -2.1548 | Down | 1.40E-16  | 5.46E-16  |
| Unigene16665  | Potri.001G088600.5  | 14.5955 | 64.9952  | -2.1548 | Down | 1.05E-46  | 9.53E-46  |
| Unigene321    | Potri.015G020600.1  | 5.8297  | 25.9663  | -2.1551 | Down | 1.03E-109 | 2.48E-108 |
| Unigene84004  | Potri.019G034500.2  | 16.1994 | 72.1574  | -2.1552 | Down | 3.03E-61  | 3.69E-60  |
| Unigene73000  | Potri.015G109300.3  | 13.2065 | 58.8358  | -2.1554 | Down | 1.01E-38  | 7.66E-38  |
| Unigene9606   | Potri.005G137500.1  | 4.3128  | 19.2136  | -2.1554 | Down | 3.98E-20  | 1.78E-19  |
| Unigene106928 | Potri.001G1375900.1 | 1.6508  | 7.3545   | -2.1555 | Down | 3.98E-20  | 1.78E-19  |
| Unigene10647  | Potri.015G058300.1  | 4.689   | 20.8922  | -2.1556 | Down | 2.76E-101 | 6.00E-100 |
| Unigene45150  | Potri.012G014700.1  | 2.7106  | 12.0769  | -2.1556 | Down | 9.37E-50  | 9.10E-49  |
| Unigene9552   | Potri.014G099300.1  | 2.3379  | 10.4184  | -2.1558 | Down | 1.52E-12  | 4.96E-12  |
| Unigene37663  | Potri.016G058300.1  | 6.8099  | 30.3473  | -2.1559 | Down | 1.15E-23  | 5.76E-23  |
| Unigene13800  | Potri.015G038400.1  | 2.521   | 11.2346  | -2.1559 | Down | 1.15E-23  | 5.76E-23  |
| Unigene37387  | Potri.011G154600.1  | 6.8957  | 30.7299  | -2.1559 | Down | 1.15E-23  | 5.76E-23  |
| Unigene118979 | Potri.006G151300.1  | 1.5224  | 6.7845   | -2.1559 | Down | 1.52E-12  | 4.96E-12  |
| Unigene37264  | Potri.007G005900.2  | 1.8632  | 8.3047   | -2.1561 | Down | 3.36E-27  | 1.88E-26  |
| Unigene100791 | Potri.003G069600.5  | 4.5306  | 20.1929  | -2.1561 | Down | 2.98E-38  | 2.24E-37  |
| Unigene35897  | Potri.012G019300.3  | 3.8358  | 17.1001  | -2.1564 | Down | 4.18E-16  | 1.60E-15  |
| Unigene17726  | Potri.004G223700.1  | 2.9717  | 13.2479  | -2.1564 | Down | 4.18E-16  | 1.60E-15  |
| Unigene17954  | Potri.008G063900.1  | 21.4014 | 95.4124  | -2.1565 | Down | 6.76E-107 | 1.57E-105 |
| Unigene11786  | Potri.005G191900.1  | 11.3612 | 50.6552  | -2.1566 | Down | 1.97E-164 | 7.99E-163 |
| Unigene21199  | Potri.014G180900.1  | 4.6436  | 20.7064  | -2.1568 | Down | 6.16E-110 | 1.49E-108 |
| Unigene80159  | Potri.015G037000.1  | 22.7436 | 101.4431 | -2.1571 | Down | 6.22E-77  | 9.76E-76  |
| Unigene10176  | Potri.008G193300.4  | 4.9866  | 22.2415  | -2.1571 | Down | 9.97E-27  | 5.50E-26  |
| Unigene18032  | Potri.017G069800.1  | 4.0653  | 18.1326  | -2.1572 | Down | 5.59E-102 | 1.23E-100 |
| Unigene32727  | Potri.012G051800.1  | 4.7188  | 21.0479  | -2.1572 | Down | 1.91E-80  | 3.16E-79  |
| Unigene29591  | Potri.009G068100.2  | 5.3927  | 24.059   | -2.1575 | Down | 5.64E-80  | 9.25E-79  |
| Unigene34154  | Potri.T170200.1     | 26.8316 | 119.713  | -2.1576 | Down | 3.36E-225 | 2.01E-223 |
| Unigene12813  | Potri.015G094800.2  | 7.4822  | 33.3874  | -2.1578 | Down | 5.75E-69  | 7.95E-68  |
| Unigene114809 | Potri.018G124100.1  | 0.9426  | 4.2071   | -2.1581 | Down | 7.76E-05  | 1.50E-04  |
| Unigene43142  | Potri.016G025500.5  | 11.9196 | 53.2017  | -2.1581 | Down | 3.21E-149 | 1.14E-147 |
| Unigene49236  | Potri.015G141700.1  | 1.4835  | 6.6214   | -2.1581 | Down | 4.57E-12  | 1.46E-11  |
| Unigene119052 | Potri.013G009100.1  | 6.5508  | 29.2387  | -2.1581 | Down | 6.41E-51  | 6.37E-50  |

|               |                    |         |          |         |      |           |           |
|---------------|--------------------|---------|----------|---------|------|-----------|-----------|
| Unigene18881  | Potri.012G119200.1 | 5.5134  | 24.6081  | -2.1581 | Down | 6.41E-51  | 6.37E-50  |
| Unigene15443  | Potri.011G119500.8 | 6.1676  | 27.5284  | -2.1581 | Down | 1.02E-22  | 4.94E-22  |
| Unigene103305 | Potri.011G007800.1 | 0.9292  | 4.1472   | -2.1581 | Down | 7.76E-05  | 1.50E-04  |
| Unigene38849  | Potri.010G119100.4 | 1.0004  | 4.465    | -2.1581 | Down | 7.76E-05  | 1.50E-04  |
| Unigene117714 | Potri.009G075300.2 | 1.3815  | 6.166    | -2.1581 | Down | 1.77E-08  | 4.61E-08  |
| Unigene20468  | Potri.007G104400.1 | 2.1534  | 9.6113   | -2.1581 | Down | 1.25E-15  | 4.68E-15  |
| Unigene116065 | Potri.007G051800.2 | 0.8505  | 3.796    | -2.1581 | Down | 7.76E-05  | 1.50E-04  |
| Unigene114007 | Potri.007G008200.1 | 0.9928  | 4.4311   | -2.1581 | Down | 7.76E-05  | 1.50E-04  |
| Unigene24830  | Potri.006G218600.1 | 0.9226  | 4.1179   | -2.1581 | Down | 7.76E-05  | 1.50E-04  |
| Unigene94664  | Potri.003G188700.2 | 1.8518  | 8.265    | -2.1581 | Down | 1.77E-08  | 4.61E-08  |
| Unigene44528  | Potri.003G126700.1 | 1.5151  | 6.7623   | -2.1581 | Down | 4.57E-12  | 1.46E-11  |
| Unigene2433   | Potri.003G045800.1 | 1.2074  | 5.389    | -2.1581 | Down | 1.25E-15  | 4.68E-15  |
| Unigene15691  | Potri.002G173800.4 | 3.369   | 15.037   | -2.1581 | Down | 1.25E-15  | 4.68E-15  |
| Unigene15511  | Potri.002G166700.4 | 0.8342  | 3.7232   | -2.1581 | Down | 7.76E-05  | 1.50E-04  |
| Unigene17778  | Potri.001G216000.1 | 2.2065  | 9.8482   | -2.1581 | Down | 4.57E-12  | 1.46E-11  |
| Unigene223    | Potri.001G036800.2 | 5.7294  | 25.5724  | -2.1581 | Down | 2.96E-26  | 1.61E-25  |
| Unigene66125  | Potri.017G117600.1 | 1.0528  | 4.6991   | -2.1582 | Down | 7.76E-05  | 1.50E-04  |
| Unigene24800  | Potri.016G138000.3 | 0.7679  | 3.4276   | -2.1582 | Down | 7.76E-05  | 1.50E-04  |
| Unigene103765 | Potri.016G128500.1 | 1.2433  | 5.5494   | -2.1582 | Down | 7.76E-05  | 1.50E-04  |
| Unigene106792 | Potri.006G238300.1 | 1.1604  | 5.1794   | -2.1582 | Down | 1.77E-08  | 4.61E-08  |
| Unigene43402  | Potri.005G159300.1 | 2.7903  | 12.4543  | -2.1582 | Down | 2.96E-26  | 1.61E-25  |
| Unigene42085  | Potri.003G204900.3 | 1.4751  | 6.584    | -2.1582 | Down | 4.57E-12  | 1.46E-11  |
| Unigene243    | Potri.008G134500.1 | 7.3195  | 32.6775  | -2.1585 | Down | 4.71E-75  | 7.17E-74  |
| Unigene24549  | Potri.007G043900.1 | 26.862  | 119.9277 | -2.1585 | Down | 4.91E-256 | 3.50E-254 |
| Unigene45153  | Potri.014G031200.1 | 11.9513 | 53.3726  | -2.1589 | Down | 4.82E-64  | 6.16E-63  |
| Unigene22673  | Potri.011G060000.1 | 9.5395  | 42.6004  | -2.1589 | Down | 3.34E-102 | 7.34E-101 |
| Unigene87330  | Potri.001G141500.1 | 37.6559 | 168.1636 | -2.1589 | Down | 6.64E-161 | 2.60E-159 |
| Unigene10925  | Potri.T148900.1    | 1.5732  | 7.0262   | -2.159  | Down | 2.59E-29  | 1.54E-28  |
| Unigene119304 | Potri.016G127600.1 | 3.0528  | 13.6343  | -2.159  | Down | 2.59E-29  | 1.54E-28  |
| Unigene45608  | Potri.011G022900.1 | 7.8201  | 34.9259  | -2.159  | Down | 1.19E-84  | 2.09E-83  |
| Unigene3160   | Potri.006G138400.1 | 2.2634  | 10.1098  | -2.1592 | Down | 8.79E-26  | 4.71E-25  |
| Unigene13200  | Potri.009G003100.1 | 12.8161 | 57.2493  | -2.1593 | Down | 2.77E-108 | 6.55E-107 |
| Unigene53195  | Potri.014G157200.3 | 11.2348 | 50.1912  | -2.1595 | Down | 2.03E-39  | 1.57E-38  |
| Unigene74737  | Potri.009G088900.3 | 23.3767 | 104.4445 | -2.1596 | Down | 3.94E-70  | 5.55E-69  |
| Unigene3012   | Potri.003G116700.1 | 2.0745  | 9.2685   | -2.1596 | Down | 5.02E-53  | 5.21E-52  |
| Unigene47607  | Potri.002G027900.1 | 15.5841 | 69.636   | -2.1598 | Down | 4.20E-63  | 5.28E-62  |
| Unigene13207  | Potri.012G100100.1 | 13.6298 | 60.9123  | -2.16   | Down | 5.97E-124 | 1.67E-122 |
| Unigene45390  | Potri.004G076600.1 | 11.2146 | 50.1314  | -2.1603 | Down | 7.79E-93  | 1.51E-91  |
| Unigene54124  | Potri.002G134400.1 | 12.0634 | 53.9288  | -2.1604 | Down | 1.61E-45  | 1.43E-44  |

|               |                    |         |          |         |      |           |           |
|---------------|--------------------|---------|----------|---------|------|-----------|-----------|
| Unigene2357   | Potri.005G207700.1 | 12.6359 | 56.4922  | -2.1605 | Down | 7.09E-96  | 1.43E-94  |
| Unigene52111  | Potri.012G106500.1 | 8.1977  | 36.6524  | -2.1606 | Down | 3.66E-62  | 4.52E-61  |
| Unigene6263   | Potri.006G131100.1 | 1.501   | 6.711    | -2.1606 | Down | 1.38E-11  | 4.28E-11  |
| Unigene106626 | Potri.005G097300.1 | 0.9947  | 4.4472   | -2.1606 | Down | 8.98E-22  | 4.24E-21  |
| Unigene12450  | Potri.004G032700.1 | 1.3393  | 5.9881   | -2.1606 | Down | 1.38E-11  | 4.28E-11  |
| Unigene4434   | Potri.012G037100.2 | 12.5274 | 56.0157  | -2.1607 | Down | 1.01E-68  | 1.39E-67  |
| Unigene45591  | Potri.001G264800.1 | 3.1959  | 14.2912  | -2.1608 | Down | 1.78E-38  | 1.34E-37  |
| Unigene83104  | Potri.018G093400.6 | 34.3548 | 153.6404 | -2.161  | Down | 4.11E-125 | 1.16E-123 |
| Unigene37069  | Potri.006G144500.1 | 35.0285 | 156.663  | -2.1611 | Down | 7.22E-258 | 5.21E-256 |
| Unigene32569  | Potri.004G085600.2 | 30.575  | 136.7652 | -2.1613 | Down | 0         | 0         |
| Unigene8994   | Potri.001G050700.4 | 27.9747 | 125.1355 | -2.1613 | Down | 1.58E-104 | 3.56E-103 |
| Unigene52195  | Potri.014G031300.1 | 11.1842 | 50.0327  | -2.1614 | Down | 5.10E-101 | 1.11E-99  |
| Unigene72111  | Potri.015G010400.1 | 10.6829 | 47.7931  | -2.1615 | Down | 1.99E-31  | 1.26E-30  |
| Unigene38884  | Potri.015G090100.2 | 7.6213  | 34.0995  | -2.1616 | Down | 1.41E-44  | 1.22E-43  |
| Unigene9482   | Potri.006G159200.1 | 0.7771  | 3.4776   | -2.1619 | Down | 5.37E-08  | 1.36E-07  |
| Unigene118161 | Potri.005G159300.2 | 2.3539  | 10.534   | -2.1619 | Down | 1.12E-14  | 4.02E-14  |
| Unigene117394 | Potri.004G211400.4 | 1.3507  | 6.0446   | -2.1619 | Down | 5.37E-08  | 1.36E-07  |
| Unigene42007  | Potri.001G370700.1 | 1.4829  | 6.6361   | -2.1619 | Down | 5.37E-08  | 1.36E-07  |
| Unigene106831 | Potri.001G215700.2 | 1.0496  | 4.697    | -2.1619 | Down | 5.37E-08  | 1.36E-07  |
| Unigene14250  | Potri.001G143900.2 | 2.2659  | 10.1402  | -2.1619 | Down | 5.37E-08  | 1.36E-07  |
| Unigene49833  | Potri.012G144900.1 | 3.2027  | 14.3329  | -2.162  | Down | 1.76E-34  | 1.20E-33  |
| Unigene85928  | Potri.010G057100.1 | 4.9311  | 22.0678  | -2.162  | Down | 2.67E-21  | 1.24E-20  |
| Unigene11852  | Potri.008G083800.2 | 3.4147  | 15.2817  | -2.162  | Down | 6.75E-28  | 3.86E-27  |
| Unigene494    | Potri.006G031900.1 | 2.4305  | 10.8772  | -2.162  | Down | 1.12E-14  | 4.02E-14  |
| Unigene105821 | Potri.003G105100.1 | 0.8643  | 3.8681   | -2.162  | Down | 5.37E-08  | 1.36E-07  |
| Unigene46210  | Potri.002G160200.1 | 30.5178 | 136.5735 | -2.162  | Down | 9.97E-120 | 2.68E-118 |
| Unigene95995  | Potri.001G074700.1 | 1.061   | 4.7484   | -2.162  | Down | 5.37E-08  | 1.36E-07  |
| Unigene8302   | Potri.011G097200.1 | 2.4397  | 10.9224  | -2.1625 | Down | 2.30E-24  | 1.18E-23  |
| Unigene33256  | Potri.004G197100.1 | 5.2672  | 23.5815  | -2.1625 | Down | 6.94E-70  | 9.73E-69  |
| Unigene8356   | Potri.017G111400.4 | 8.6185  | 38.5869  | -2.1626 | Down | 2.51E-63  | 3.16E-62  |
| Unigene44684  | Potri.010G027900.1 | 3.0352  | 13.5888  | -2.1626 | Down | 2.30E-24  | 1.18E-23  |
| Unigene13701  | Potri.006G062300.2 | 5.7788  | 25.8738  | -2.1627 | Down | 1.38E-40  | 1.10E-39  |
| Unigene39590  | Potri.012G005500.2 | 4.1278  | 18.4852  | -2.1629 | Down | 1.23E-43  | 1.05E-42  |
| Unigene44026  | Potri.019G042700.3 | 3.7154  | 16.6392  | -2.163  | Down | 2.00E-27  | 1.13E-26  |
| Unigene48859  | Potri.008G151900.1 | 2.1495  | 9.6263   | -2.163  | Down | 2.00E-27  | 1.13E-26  |
| Unigene8170   | Potri.006G140500.1 | 5.0993  | 22.8395  | -2.1632 | Down | 1.19E-91  | 2.28E-90  |
| Unigene100034 | Potri.013G041200.1 | 3.3909  | 15.1896  | -2.1633 | Down | 7.95E-21  | 3.64E-20  |
| Unigene34201  | Potri.006G075500.1 | 3.2659  | 14.6296  | -2.1633 | Down | 9.86E-50  | 9.57E-49  |
| Unigene10135  | Potri.004G147700.1 | 1.6034  | 7.1824   | -2.1633 | Down | 4.14E-11  | 1.26E-10  |

|               |                    |         |          |         |      |           |           |
|---------------|--------------------|---------|----------|---------|------|-----------|-----------|
| Unigene105257 | Potri.007G020600.1 | 1.1467  | 5.1369   | -2.1634 | Down | 4.14E-11  | 1.26E-10  |
| Unigene24517  | Potri.004G020900.1 | 1.1375  | 5.0957   | -2.1634 | Down | 4.14E-11  | 1.26E-10  |
| Unigene8407   | Potri.002G180000.1 | 3.1806  | 14.2517  | -2.1638 | Down | 6.84E-24  | 3.46E-23  |
| Unigene7195   | Potri.016G032100.1 | 1.0258  | 4.5976   | -2.1641 | Down | 3.35E-14  | 1.18E-13  |
| Unigene11927  | Potri.008G095800.1 | 1.608   | 7.208    | -2.1643 | Down | 5.19E-30  | 3.15E-29  |
| Unigene23347  | Potri.002G253500.2 | 34.1772 | 153.1947 | -2.1643 | Down | 2.00E-206 | 1.08E-204 |
| Unigene16925  | Potri.010G051600.4 | 5.696   | 25.5364  | -2.1645 | Down | 4.57E-33  | 3.02E-32  |
| Unigene28294  | Potri.002G183000.1 | 25.2464 | 113.1854 | -2.1645 | Down | 1.62E-158 | 6.24E-157 |
| Unigene45124  | Potri.012G014300.1 | 6.6283  | 29.7175  | -2.1646 | Down | 3.21E-83  | 5.50E-82  |
| Unigene106815 | Potri.010G056300.1 | 2.5415  | 11.3952  | -2.1647 | Down | 4.04E-36  | 2.88E-35  |
| Unigene2552   | Potri.017G075600.1 | 1.1686  | 5.2401   | -2.1648 | Down | 2.37E-20  | 1.07E-19  |
| Unigene53643  | Potri.016G094800.1 | 5.9744  | 26.7901  | -2.1648 | Down | 2.37E-20  | 1.07E-19  |
| Unigene40192  | Potri.006G184300.1 | 2.681   | 12.0231  | -2.165  | Down | 3.19E-42  | 2.63E-41  |
| Unigene18195  | Potri.006G100200.1 | 7.6906  | 34.4888  | -2.165  | Down | 3.19E-42  | 2.63E-41  |
| Unigene4158   | Potri.005G229600.2 | 39.7404 | 178.2448 | -2.1652 | Down | 2.76E-265 | 2.06E-263 |
| Unigene74186  | Potri.002G004500.2 | 35.0337 | 157.173  | -2.1655 | Down | 1.44E-103 | 3.20E-102 |
| Unigene94612  | Potri.008G193200.1 | 4.3849  | 19.674   | -2.1657 | Down | 9.42E-42  | 7.70E-41  |
| Unigene23707  | Potri.001G252500.2 | 8.4348  | 37.8563  | -2.1661 | Down | 1.25E-102 | 2.75E-101 |
| Unigene25074  | Potri.003G123700.2 | 0.9061  | 4.0673   | -2.1663 | Down | 2.44E-04  | 4.48E-04  |
| Unigene51822  | Potri.T151000.1    | 1.7215  | 7.7279   | -2.1664 | Down | 1.00E-13  | 3.46E-13  |
| Unigene27511  | Potri.019G054600.4 | 1.1506  | 5.1652   | -2.1664 | Down | 1.64E-07  | 3.99E-07  |
| Unigene63550  | Potri.019G013100.1 | 3.5808  | 16.0741  | -2.1664 | Down | 7.05E-20  | 3.12E-19  |
| Unigene8691   | Potri.017G081900.1 | 1.6516  | 7.4142   | -2.1664 | Down | 1.64E-07  | 3.99E-07  |
| Unigene20483  | Potri.015G130700.4 | 1.5381  | 6.9047   | -2.1664 | Down | 1.64E-07  | 3.99E-07  |
| Unigene109957 | Potri.014G179100.1 | 1.0219  | 4.5874   | -2.1664 | Down | 2.44E-04  | 4.48E-04  |
| Unigene6306   | Potri.014G010700.1 | 0.9605  | 4.3117   | -2.1664 | Down | 1.00E-13  | 3.46E-13  |
| Unigene115792 | Potri.014G008300.1 | 0.7485  | 3.36     | -2.1664 | Down | 2.44E-04  | 4.48E-04  |
| Unigene52284  | Potri.013G014100.2 | 2.4116  | 10.8258  | -2.1664 | Down | 8.33E-17  | 3.28E-16  |
| Unigene104754 | Potri.012G059200.1 | 0.7664  | 3.4405   | -2.1664 | Down | 1.00E-13  | 3.46E-13  |
| Unigene110001 | Potri.010G246200.1 | 1.0219  | 4.5874   | -2.1664 | Down | 2.44E-04  | 4.48E-04  |
| Unigene118449 | Potri.008G181400.4 | 1.0104  | 4.5356   | -2.1664 | Down | 1.64E-07  | 3.99E-07  |
| Unigene20894  | Potri.008G167400.1 | 0.8742  | 3.9243   | -2.1664 | Down | 2.44E-04  | 4.48E-04  |
| Unigene25391  | Potri.008G055700.1 | 0.9483  | 4.2569   | -2.1664 | Down | 2.44E-04  | 4.48E-04  |
| Unigene74480  | Potri.007G137200.2 | 2.0722  | 9.3021   | -2.1664 | Down | 1.64E-07  | 3.99E-07  |
| Unigene24798  | Potri.006G080700.2 | 21.4502 | 96.2904  | -2.1664 | Down | 4.88E-93  | 9.51E-92  |
| Unigene51402  | Potri.005G216300.4 | 0.6761  | 3.0351   | -2.1664 | Down | 2.44E-04  | 4.48E-04  |
| Unigene113250 | Potri.005G053200.1 | 0.8881  | 3.9866   | -2.1664 | Down | 2.44E-04  | 4.48E-04  |
| Unigene116227 | Potri.004G229600.1 | 0.7173  | 3.22     | -2.1664 | Down | 2.44E-04  | 4.48E-04  |
| Unigene55981  | Potri.003G135600.1 | 0.7993  | 3.588    | -2.1664 | Down | 2.44E-04  | 4.48E-04  |

|               |                    |         |          |         |      |           |           |
|---------------|--------------------|---------|----------|---------|------|-----------|-----------|
| Unigene114732 | Potri.003G102600.1 | 0.8138  | 3.6532   | -2.1664 | Down | 2.44E-04  | 4.48E-04  |
| Unigene68602  | Potri.003G071300.1 | 1.3165  | 5.9096   | -2.1664 | Down | 1.64E-07  | 3.99E-07  |
| Unigene24593  | Potri.003G063300.2 | 1.6997  | 7.6301   | -2.1664 | Down | 1.25E-10  | 3.69E-10  |
| Unigene22210  | Potri.002G254600.2 | 4.4171  | 19.8282  | -2.1664 | Down | 7.05E-20  | 3.12E-19  |
| Unigene48372  | Potri.002G143000.1 | 3.3237  | 14.9202  | -2.1664 | Down | 1.25E-10  | 3.69E-10  |
| Unigene39633  | Potri.002G104100.3 | 2.9912  | 13.4276  | -2.1664 | Down | 3.54E-35  | 2.46E-34  |
| Unigene23417  | Potri.002G084700.1 | 1.0377  | 4.6583   | -2.1664 | Down | 1.25E-10  | 3.69E-10  |
| Unigene48045  | Potri.001G343700.1 | 0.9837  | 4.416    | -2.1664 | Down | 1.64E-07  | 3.99E-07  |
| Unigene51438  | Potri.001G123500.1 | 11.2839 | 50.6536  | -2.1664 | Down | 3.13E-38  | 2.36E-37  |
| Unigene7423   | Potri.001G010500.4 | 1.2813  | 5.7517   | -2.1664 | Down | 1.25E-10  | 3.69E-10  |
| Unigene24691  | Potri.001G005100.1 | 2.4593  | 11.0399  | -2.1664 | Down | 7.05E-20  | 3.12E-19  |
| Unigene101424 | Potri.006G210900.1 | 0.8413  | 3.7768   | -2.1665 | Down | 1.64E-07  | 3.99E-07  |
| Unigene53508  | Potri.001G148300.1 | 1.097   | 4.9247   | -2.1665 | Down | 2.44E-04  | 4.48E-04  |
| Unigene64398  | Potri.001G323100.3 | 8.7469  | 39.2719  | -2.1667 | Down | 6.84E-117 | 1.78E-115 |
| Unigene28306  | Potri.002G134300.1 | 7.6533  | 34.3701  | -2.167  | Down | 5.88E-50  | 5.73E-49  |
| Unigene85295  | Potri.019G066600.4 | 10.787  | 48.4463  | -2.1671 | Down | 7.34E-44  | 6.28E-43  |
| Unigene21639  | Potri.015G079500.1 | 3.6442  | 16.3718  | -2.1675 | Down | 1.83E-79  | 2.99E-78  |
| Unigene32240  | Potri.001G030200.1 | 3.4276  | 15.3982  | -2.1675 | Down | 2.10E-109 | 5.03E-108 |
| Unigene82890  | Potri.006G227600.4 | 24.7725 | 111.3054 | -2.1677 | Down | 3.68E-91  | 7.00E-90  |
| Unigene34214  | Potri.015G053400.1 | 6.0494  | 27.1831  | -2.1678 | Down | 7.45E-103 | 1.65E-101 |
| Unigene34793  | Potri.010G148900.2 | 10.7694 | 48.3976  | -2.168  | Down | 2.39E-203 | 1.27E-201 |
| Unigene42659  | Potri.018G080400.1 | 8.1442  | 36.6028  | -2.1681 | Down | 1.19E-87  | 2.17E-86  |
| Unigene10971  | Potri.014G047500.1 | 4.9832  | 22.3963  | -2.1681 | Down | 7.28E-70  | 1.02E-68  |
| Unigene33964  | Potri.008G197000.1 | 10.9819 | 49.3564  | -2.1681 | Down | 1.19E-87  | 2.17E-86  |
| Unigene50840  | Potri.T099700.5    | 1.4637  | 6.5797   | -2.1684 | Down | 2.49E-16  | 9.60E-16  |
| Unigene31798  | Potri.011G091200.1 | 17.6614 | 79.391   | -2.1684 | Down | 0         | 0         |
| Unigene5840   | Potri.001G244400.1 | 11.3068 | 50.8266  | -2.1684 | Down | 5.73E-46  | 5.14E-45  |
| Unigene20435  | Potri.001G145900.1 | 2.142   | 9.6285   | -2.1684 | Down | 2.49E-16  | 9.60E-16  |
| Unigene86432  | Potri.012G108200.1 | 34.3255 | 154.3326 | -2.1687 | Down | 1.37E-142 | 4.56E-141 |
| Unigene104949 | Potri.012G140700.1 | 1.0929  | 4.9144   | -2.1689 | Down | 3.01E-13  | 1.01E-12  |
| Unigene50616  | Potri.012G051200.1 | 1.7508  | 7.873    | -2.1689 | Down | 3.01E-13  | 1.01E-12  |
| Unigene87725  | Potri.003G015300.1 | 24.0116 | 107.9977 | -2.1692 | Down | 1.37E-106 | 3.18E-105 |
| Unigene16996  | Potri.017G138600.1 | 5.2988  | 23.8425  | -2.1698 | Down | 1.19E-27  | 6.76E-27  |
| Unigene9614   | Potri.010G055200.3 | 2.2171  | 9.976    | -2.1698 | Down | 6.25E-19  | 2.68E-18  |
| Unigene102048 | Potri.010G040600.2 | 1.8928  | 8.5169   | -2.1698 | Down | 3.76E-10  | 1.08E-09  |
| Unigene107115 | Potri.009G112000.2 | 3.3939  | 15.2711  | -2.1698 | Down | 1.06E-53  | 1.12E-52  |
| Unigene51872  | Potri.004G075500.5 | 4.4342  | 19.9521  | -2.1698 | Down | 6.25E-19  | 2.68E-18  |
| Unigene47043  | Potri.003G157100.3 | 1.7045  | 7.6698   | -2.1698 | Down | 3.76E-10  | 1.08E-09  |
| Unigene21005  | Potri.003G101000.1 | 3.2155  | 14.4683  | -2.1698 | Down | 5.01E-45  | 4.39E-44  |

|               |                    |         |          |         |      |           |           |
|---------------|--------------------|---------|----------|---------|------|-----------|-----------|
| Unigene12964  | Potri.003G129000.3 | 9.1538  | 41.1991  | -2.1702 | Down | 2.82E-56  | 3.13E-55  |
| Unigene11569  | Potri.001G387500.2 | 3.6801  | 16.5646  | -2.1703 | Down | 6.76E-62  | 8.31E-61  |
| Unigene58     | Potri.005G149500.1 | 10.7421 | 48.3545  | -2.1704 | Down | 1.00E-304 | 9.03E-303 |
| Unigene119387 | Potri.008G133800.1 | 1.4307  | 6.4406   | -2.1705 | Down | 7.43E-16  | 2.81E-15  |
| Unigene85617  | Potri.012G068800.1 | 84.5969 | 380.8618 | -2.1706 | Down | 0         | 0         |
| Unigene8335   | Potri.010G254200.1 | 14.2065 | 63.9577  | -2.1706 | Down | 1.53E-121 | 4.18E-120 |
| Unigene18909  | Potri.008G142500.1 | 4.3553  | 19.6113  | -2.1708 | Down | 1.59E-21  | 7.44E-21  |
| Unigene21326  | Potri.005G132000.1 | 4.0849  | 18.3929  | -2.1708 | Down | 1.05E-75  | 1.61E-74  |
| Unigene18237  | Potri.004G149400.1 | 2.5124  | 11.3129  | -2.1708 | Down | 1.59E-21  | 7.44E-21  |
| Unigene73610  | Potri.002G007800.2 | 6.8617  | 30.8971  | -2.1708 | Down | 1.59E-21  | 7.44E-21  |
| Unigene5307   | Potri.017G106900.2 | 22.5602 | 101.5973 | -2.171  | Down | 2.80E-78  | 4.48E-77  |
| Unigene10890  | Potri.013G076600.1 | 9.4465  | 42.5439  | -2.1711 | Down | 1.32E-120 | 3.59E-119 |
| Unigene50844  | Potri.010G223400.1 | 4.4877  | 20.2115  | -2.1711 | Down | 8.06E-33  | 5.29E-32  |
| Unigene80575  | Potri.002G172800.1 | 34.9028 | 157.1903 | -2.1711 | Down | 1.32E-120 | 3.59E-119 |
| Unigene48852  | Potri.019G112000.1 | 6.1596  | 27.7425  | -2.1712 | Down | 1.87E-38  | 1.41E-37  |
| Unigene11081  | Potri.005G147900.1 | 4.0421  | 18.2098  | -2.1715 | Down | 2.35E-156 | 8.88E-155 |
| Unigene31529  | Potri.T105500.1    | 0.9542  | 4.2989   | -2.1716 | Down | 5.00E-07  | 1.18E-06  |
| Unigene116553 | Potri.015G020400.1 | 1.2703  | 5.723    | -2.1716 | Down | 5.00E-07  | 1.18E-06  |
| Unigene4728   | Potri.005G202900.1 | 1.3365  | 6.0212   | -2.1716 | Down | 5.00E-07  | 1.18E-06  |
| Unigene14143  | Potri.004G163600.2 | 2.8692  | 12.9267  | -2.1716 | Down | 9.03E-13  | 2.98E-12  |
| Unigene33110  | Potri.002G062600.9 | 4.5387  | 20.4482  | -2.1716 | Down | 9.17E-30  | 5.53E-29  |
| Unigene96567  | Potri.019G028400.1 | 0.89    | 4.0098   | -2.1717 | Down | 5.00E-07  | 1.18E-06  |
| Unigene64252  | Potri.010G150000.3 | 3.8525  | 17.357   | -2.1717 | Down | 9.03E-13  | 2.98E-12  |
| Unigene15049  | Potri.009G162800.1 | 0.7598  | 3.4232   | -2.1717 | Down | 5.00E-07  | 1.18E-06  |
| Unigene115685 | Potri.009G130000.1 | 1.3861  | 6.245    | -2.1717 | Down | 5.00E-07  | 1.18E-06  |
| Unigene107222 | Potri.001G378900.1 | 1.9445  | 8.7608   | -2.1717 | Down | 4.07E-24  | 2.07E-23  |
| Unigene103393 | Potri.001G208900.3 | 1.0797  | 4.8645   | -2.1717 | Down | 5.00E-07  | 1.18E-06  |
| Unigene1924   | Potri.008G129200.1 | 13.9743 | 62.9643  | -2.1718 | Down | 4.60E-139 | 1.49E-137 |
| Unigene32532  | Potri.015G103700.1 | 4.5382  | 20.4495  | -2.1719 | Down | 1.01E-71  | 1.46E-70  |
| Unigene24507  | Potri.002G111700.1 | 4.4166  | 19.9016  | -2.1719 | Down | 1.01E-71  | 1.46E-70  |
| Unigene17881  | Potri.001G036800.2 | 7.4439  | 33.5452  | -2.172  | Down | 3.06E-49  | 2.94E-48  |
| Unigene38210  | Potri.T159400.1    | 11.5658 | 52.1265  | -2.1722 | Down | 4.63E-63  | 5.81E-62  |
| Unigene89945  | Potri.003G037800.3 | 4.9531  | 22.3251  | -2.1723 | Down | 1.05E-26  | 5.79E-26  |
| Unigene119173 | Potri.007G104400.2 | 2.3545  | 10.6137  | -2.1724 | Down | 4.73E-21  | 2.18E-20  |
| Unigene69600  | Potri.009G060800.6 | 7.7667  | 35.02    | -2.1728 | Down | 3.82E-43  | 3.22E-42  |
| Unigene107240 | Potri.009G020600.2 | 2.0938  | 9.4417   | -2.1729 | Down | 2.39E-51  | 2.40E-50  |
| Unigene62014  | Potri.017G152600.1 | 8.8507  | 39.9128  | -2.173  | Down | 1.63E-37  | 1.21E-36  |
| Unigene2166   | Potri.018G073400.2 | 6.057   | 27.3162  | -2.1731 | Down | 1.04E-111 | 2.56E-110 |
| Unigene14119  | Potri.018G026900.1 | 7.2247  | 32.5826  | -2.1731 | Down | 1.21E-23  | 6.06E-23  |



|               |                     |         |          |         |      |           |           |
|---------------|---------------------|---------|----------|---------|------|-----------|-----------|
| Unigene18957  | Potri.017G022000.1  | 3.0377  | 13.6995  | -2.1731 | Down | 1.21E-23  | 6.06E-23  |
| Unigene44155  | Potri.010G141700.2  | 1.481   | 6.679    | -2.1731 | Down | 1.21E-23  | 6.06E-23  |
| Unigene7056   | Potri.003G132600.1  | 20.63   | 93.0437  | -2.1732 | Down | 3.60E-180 | 1.64E-178 |
| Unigene118767 | Potri.012G070500.1  | 1.228   | 5.5399   | -2.1735 | Down | 1.14E-09  | 3.18E-09  |
| Unigene27327  | Potri.011G169600.1  | 1.3088  | 5.9044   | -2.1735 | Down | 1.14E-09  | 3.18E-09  |
| Unigene22507  | Potri.018G028600.2  | 2.3013  | 10.382   | -2.1736 | Down | 3.11E-26  | 1.69E-25  |
| Unigene31516  | Potri.018G005600.2  | 1.3976  | 6.3054   | -2.1736 | Down | 1.14E-09  | 3.18E-09  |
| Unigene31351  | Potri.013G051200.4  | 7.3077  | 32.9683  | -2.1736 | Down | 3.11E-26  | 1.69E-25  |
| Unigene24337  | Potri.013G035600.1  | 2.1741  | 9.8084   | -2.1736 | Down | 5.56E-18  | 2.29E-17  |
| Unigene49511  | Potri.010G137700.1  | 2.0508  | 9.2523   | -2.1736 | Down | 1.14E-09  | 3.18E-09  |
| Unigene5736   | Potri.004G083700.1  | 1.0307  | 4.6501   | -2.1736 | Down | 1.14E-09  | 3.18E-09  |
| Unigene23631  | Potri.002G020200.1  | 14.1346 | 63.7676  | -2.1736 | Down | 1.84E-75  | 2.82E-74  |
| Unigene18932  | Potri.002G007800.1  | 2.3267  | 10.4967  | -2.1736 | Down | 5.56E-18  | 2.29E-17  |
| Unigene21641  | Potri.016G112900.1  | 6.6488  | 29.9971  | -2.1737 | Down | 3.40E-176 | 1.50E-174 |
| Unigene110    | Potri.013G150300.4  | 8.1788  | 36.9019  | -2.1737 | Down | 2.06E-162 | 8.20E-161 |
| Unigene69521  | Potri.006G233000.1  | 8.4546  | 38.1492  | -2.1738 | Down | 2.98E-45  | 2.63E-44  |
| Unigene8434   | Potri.008G130000.1  | 16.5285 | 74.6093  | -2.1744 | Down | 3.07E-193 | 1.53E-191 |
| Unigene38831  | Potri.011G098300.1  | 1.6251  | 7.3367   | -2.1746 | Down | 2.71E-12  | 8.73E-12  |
| Unigene62221  | Potri.010G155600.1  | 2.3808  | 10.7486  | -2.1746 | Down | 2.71E-12  | 8.73E-12  |
| Unigene103153 | Potri.001G368000.12 | 0.9541  | 4.3073   | -2.1746 | Down | 2.71E-12  | 8.73E-12  |
| Unigene103324 | Potri.011G041400.1  | 0.9658  | 4.3604   | -2.1747 | Down | 2.71E-12  | 8.73E-12  |
| Unigene9004   | Potri.002G215800.2  | 16.037  | 72.411   | -2.1748 | Down | 5.35E-93  | 1.04E-91  |
| Unigene177    | Potri.017G006800.1  | 9.2568  | 41.7985  | -2.1749 | Down | 1.77E-71  | 2.55E-70  |
| Unigene30949  | Potri.011G119500.8  | 5.1278  | 23.1576  | -2.1751 | Down | 3.76E-39  | 2.89E-38  |
| Unigene1407   | Potri.006G114700.1  | 16.1789 | 73.0773  | -2.1753 | Down | 2.56E-124 | 7.19E-123 |
| Unigene10675  | Potri.001G179800.1  | 6.7418  | 30.4527  | -2.1754 | Down | 1.01E-182 | 4.72E-181 |
| Unigene31860  | Potri.T048300.1     | 8.4278  | 38.0742  | -2.1756 | Down | 8.06E-185 | 3.82E-183 |
| Unigene38158  | Potri.014G096800.1  | 2.025   | 9.149    | -2.1757 | Down | 1.66E-17  | 6.72E-17  |
| Unigene157    | Potri.012G037100.1  | 8.9184  | 40.2936  | -2.1757 | Down | 1.76E-274 | 1.38E-272 |
| Unigene42445  | Potri.004G235800.1  | 12.1794 | 55.0325  | -2.1758 | Down | 0         | 0         |
| Unigene33319  | Potri.002G142700.1  | 7.5047  | 33.91    | -2.1758 | Down | 4.24E-36  | 3.02E-35  |
| Unigene21651  | Potri.014G043100.1  | 2.7799  | 12.5615  | -2.1759 | Down | 1.28E-54  | 1.37E-53  |
| Unigene40281  | Potri.008G130200.2  | 7.1812  | 32.4484  | -2.1759 | Down | 4.24E-36  | 3.02E-35  |
| Unigene17907  | Potri.010G118300.1  | 1.6557  | 7.4821   | -2.176  | Down | 4.19E-20  | 1.87E-19  |
| Unigene36871  | Potri.010G254200.1  | 27.731  | 125.3282 | -2.1761 | Down | 2.15E-162 | 8.57E-161 |
| Unigene72489  | Potri.010G074800.6  | 13.8747 | 62.7045  | -2.1761 | Down | 2.92E-41  | 2.36E-40  |
| Unigene18621  | Potri.005G129800.1  | 5.2818  | 23.8694  | -2.1761 | Down | 9.02E-60  | 1.07E-58  |
| Unigene15513  | Potri.006G260100.1  | 1.3474  | 6.0897   | -2.1762 | Down | 1.07E-22  | 5.19E-22  |
| Unigene16046  | Potri.001G289900.1  | 2.1363  | 9.6561   | -2.1763 | Down | 2.03E-46  | 1.84E-45  |

|               |                    |         |          |         |      |           |           |
|---------------|--------------------|---------|----------|---------|------|-----------|-----------|
| Unigene20312  | Potri.008G153200.1 | 18.924  | 85.5413  | -2.1764 | Down | 1.21E-72  | 1.78E-71  |
| Unigene92895  | Potri.012G088500.2 | 28.4635 | 128.6707 | -2.1765 | Down | 1.71E-203 | 9.05E-202 |
| Unigene9796   | Potri.011G057200.1 | 34.5831 | 156.3508 | -2.1766 | Down | 9.87E-172 | 4.22E-170 |
| Unigene3148   | Potri.006G277100.1 | 6.552   | 29.6199  | -2.1766 | Down | 2.31E-80  | 3.82E-79  |
| Unigene39017  | Potri.004G034800.1 | 9.9048  | 44.7778  | -2.1766 | Down | 6.19E-83  | 1.06E-81  |
| Unigene76290  | Potri.007G073200.4 | 11.7701 | 53.2231  | -2.1769 | Down | 3.29E-38  | 2.47E-37  |
| Unigene7882   | Potri.002G163000.2 | 6.2961  | 28.4688  | -2.1769 | Down | 1.25E-35  | 8.84E-35  |
| Unigene40733  | Potri.016G005500.1 | 12.3822 | 55.9958  | -2.1771 | Down | 2.28E-43  | 1.93E-42  |
| Unigene45290  | Potri.015G146100.1 | 3.2759  | 14.8161  | -2.1772 | Down | 1.11E-53  | 1.17E-52  |
| Unigene44487  | Potri.013G104100.4 | 26.1043 | 118.0622 | -2.1772 | Down | 6.99E-251 | 4.83E-249 |
| Unigene9967   | Potri.005G234900.1 | 11.8293 | 53.5037  | -2.1773 | Down | 7.86E-59  | 9.15E-58  |
| Unigene81108  | Potri.003G101600.1 | 18.6498 | 84.357   | -2.1773 | Down | 1.48E-66  | 1.97E-65  |
| Unigene85774  | Potri.T046200.1    | 16.6766 | 75.433   | -2.1774 | Down | 3.95E-69  | 5.48E-68  |
| Unigene19194  | Potri.009G046700.2 | 15.2225 | 68.8615  | -2.1775 | Down | 1.03E-89  | 1.93E-88  |
| Unigene19507  | Potri.T044400.2    | 1.0734  | 4.8569   | -2.1778 | Down | 8.15E-12  | 2.56E-11  |
| Unigene47988  | Potri.008G216800.2 | 1.7512  | 7.9238   | -2.1778 | Down | 1.53E-06  | 3.48E-06  |
| Unigene69718  | Potri.005G144700.1 | 0.8575  | 3.88     | -2.1778 | Down | 1.53E-06  | 3.48E-06  |
| Unigene98548  | Potri.001G241400.2 | 0.901   | 4.0768   | -2.1778 | Down | 3.44E-09  | 9.37E-09  |
| Unigene2568   | Potri.017G138500.5 | 16.8499 | 76.2446  | -2.1779 | Down | 5.90E-115 | 1.51E-113 |
| Unigene28347  | Potri.014G164300.2 | 6.6268  | 29.9859  | -2.1779 | Down | 9.73E-38  | 7.23E-37  |
| Unigene7009   | Potri.014G039700.1 | 10.7491 | 48.6392  | -2.1779 | Down | 3.29E-53  | 3.43E-52  |
| Unigene53035  | Potri.013G150200.1 | 7.3497  | 33.2567  | -2.1779 | Down | 3.18E-22  | 1.52E-21  |
| Unigene5287   | Potri.013G079000.2 | 7.0046  | 31.6954  | -2.1779 | Down | 3.18E-22  | 1.52E-21  |
| Unigene87015  | Potri.012G082700.2 | 1.2071  | 5.4621   | -2.1779 | Down | 1.53E-06  | 3.48E-06  |
| Unigene26350  | Potri.011G050600.1 | 1.535   | 6.9456   | -2.1779 | Down | 1.53E-06  | 3.48E-06  |
| Unigene34835  | Potri.010G102900.1 | 1.8465  | 8.3553   | -2.1779 | Down | 1.42E-32  | 9.26E-32  |
| Unigene41939  | Potri.010G081200.3 | 1.9631  | 8.883    | -2.1779 | Down | 1.99E-14  | 7.07E-14  |
| Unigene39072  | Potri.009G123000.1 | 1.8511  | 8.3761   | -2.1779 | Down | 8.15E-12  | 2.56E-11  |
| Unigene9702   | Potri.009G116100.2 | 9.0114  | 40.7762  | -2.1779 | Down | 6.17E-61  | 7.45E-60  |
| Unigene53806  | Potri.009G060600.1 | 8.9112  | 40.3224  | -2.1779 | Down | 9.73E-38  | 7.23E-37  |
| Unigene115809 | Potri.008G173900.1 | 1.2475  | 5.6447   | -2.1779 | Down | 1.53E-06  | 3.48E-06  |
| Unigene27112  | Potri.008G145100.2 | 5.8855  | 26.6316  | -2.1779 | Down | 6.73E-43  | 5.64E-42  |
| Unigene33488  | Potri.007G102000.1 | 4.924   | 22.2809  | -2.1779 | Down | 6.73E-43  | 5.64E-42  |
| Unigene78647  | Potri.006G063000.1 | 19.5901 | 88.6438  | -2.1779 | Down | 4.37E-66  | 5.79E-65  |
| Unigene31275  | Potri.004G069200.1 | 0.9515  | 4.3056   | -2.1779 | Down | 1.53E-06  | 3.48E-06  |
| Unigene36171  | Potri.003G062700.1 | 2.8781  | 13.023   | -2.1779 | Down | 1.99E-14  | 7.07E-14  |
| Unigene118545 | Potri.002G245700.2 | 0.8234  | 3.7258   | -2.1779 | Down | 1.53E-06  | 3.48E-06  |
| Unigene33538  | Potri.001G387300.1 | 10.9705 | 49.6405  | -2.1779 | Down | 8.73E-56  | 9.60E-55  |
| Unigene15459  | Potri.001G367900.1 | 6.1596  | 27.8716  | -2.1779 | Down | 4.69E-48  | 4.40E-47  |

|               |                    |          |          |         |      |           |           |
|---------------|--------------------|----------|----------|---------|------|-----------|-----------|
| Unigene24822  | Potri.001G084400.3 | 1.6504   | 7.468    | -2.1779 | Down | 1.53E-06  | 3.48E-06  |
| Unigene23159  | Potri.005G186900.1 | 24.2392  | 109.7044 | -2.1782 | Down | 1.74E-114 | 4.41E-113 |
| Unigene21653  | Potri.005G108800.1 | 14.5468  | 65.8368  | -2.1782 | Down | 0         | 0         |
| Unigene12456  | Potri.015G142200.1 | 11.6324  | 52.6494  | -2.1783 | Down | 1.73E-96  | 3.52E-95  |
| Unigene71576  | Potri.006G063000.1 | 28.2962  | 128.078  | -2.1783 | Down | 4.67E-81  | 7.77E-80  |
| Unigene85322  | Potri.009G037000.1 | 17.3547  | 78.5565  | -2.1784 | Down | 9.17E-71  | 1.30E-69  |
| Unigene23468  | Potri.005G221100.1 | 13.4705  | 60.9723  | -2.1784 | Down | 1.05E-157 | 4.03E-156 |
| Unigene23559  | Potri.019G041500.1 | 17.0655  | 77.2562  | -2.1786 | Down | 8.34E-160 | 3.24E-158 |
| Unigene7876   | Potri.006G079300.2 | 5.8852   | 26.6473  | -2.1788 | Down | 5.15E-78  | 8.20E-77  |
| Unigene17770  | Potri.003G003500.1 | 13.7629  | 62.3193  | -2.1789 | Down | 7.22E-73  | 1.06E-71  |
| Unigene44077  | Potri.008G088600.4 | 4.9789   | 22.5474  | -2.1791 | Down | 4.21E-32  | 2.71E-31  |
| Unigene27695  | Potri.013G112500.1 | 11.366   | 51.4819  | -2.1793 | Down | 5.69E-75  | 8.65E-74  |
| Unigene17916  | Potri.011G046900.1 | 6.9937   | 31.6783  | -2.1794 | Down | 1.08E-49  | 1.05E-48  |
| Unigene50000  | Potri.007G003200.7 | 6.4482   | 29.2082  | -2.1794 | Down | 4.42E-95  | 8.85E-94  |
| Unigene40847  | Potri.018G032500.1 | 9.8289   | 44.5296  | -2.1797 | Down | 5.88E-42  | 4.83E-41  |
| Unigene79832  | Potri.006G138000.1 | 47.6945  | 216.0778 | -2.1797 | Down | 1.34E-162 | 5.35E-161 |
| Unigene88457  | Potri.013G144000.1 | 37.0755  | 167.9814 | -2.1798 | Down | 2.09E-172 | 8.94E-171 |
| Unigene3466   | Potri.011G137200.2 | 4.2273   | 19.1549  | -2.1799 | Down | 3.71E-19  | 1.60E-18  |
| Unigene116057 | Potri.002G240800.2 | 4.1444   | 18.7794  | -2.1799 | Down | 3.71E-19  | 1.60E-18  |
| Unigene83575  | Potri.001G231100.1 | 160.2091 | 726.0028 | -2.18   | Down | 0         | 0         |
| Unigene47409  | Potri.013G136700.1 | 58.3288  | 264.3371 | -2.1801 | Down | 0         | 0         |
| Unigene31711  | Potri.015G028300.2 | 5.0428   | 22.8559  | -2.1803 | Down | 1.25E-31  | 7.92E-31  |
| Unigene53001  | Potri.002G057800.1 | 3.0299   | 13.7328  | -2.1803 | Down | 1.48E-16  | 5.75E-16  |
| Unigene23125  | Potri.014G025200.2 | 26.4787  | 120.0184 | -2.1804 | Down | 1.38E-275 | 1.09E-273 |
| Unigene32950  | Potri.001G211700.1 | 8.0686   | 36.5759  | -2.1805 | Down | 3.08E-178 | 1.38E-176 |
| Unigene67865  | Potri.016G020100.1 | 2.984    | 13.529   | -2.1807 | Down | 5.95E-14  | 2.07E-13  |
| Unigene50483  | Potri.003G096300.1 | 1.6987   | 7.7015   | -2.1807 | Down | 5.95E-14  | 2.07E-13  |
| Unigene90865  | Potri.015G035800.1 | 20.294   | 92.011   | -2.1808 | Down | 2.64E-113 | 6.61E-112 |
| Unigene42240  | Potri.006G214600.1 | 24.1219  | 109.3663 | -2.1808 | Down | 2.64E-113 | 6.62E-112 |
| Unigene79577  | Potri.005G053900.3 | 7.3678   | 33.405   | -2.1808 | Down | 1.85E-26  | 1.01E-25  |
| Unigene110777 | Potri.006G076200.1 | 11.0578  | 50.1426  | -2.181  | Down | 2.52E-36  | 1.81E-35  |
| Unigene14296  | Potri.016G006600.1 | 6.0984   | 27.656   | -2.1811 | Down | 7.19E-24  | 3.63E-23  |
| Unigene54181  | Potri.015G050300.2 | 6.5733   | 29.8095  | -2.1811 | Down | 7.19E-24  | 3.63E-23  |
| Unigene73970  | Potri.010G239900.6 | 33.447   | 151.685  | -2.1811 | Down | 1.89E-100 | 4.07E-99  |
| Unigene30066  | Potri.008G195300.5 | 13.7419  | 62.3223  | -2.1812 | Down | 5.19E-56  | 5.73E-55  |
| Unigene20117  | Potri.015G035600.1 | 8.4772   | 38.4499  | -2.1813 | Down | 4.02E-105 | 9.10E-104 |
| Unigene51834  | Potri.013G014100.2 | 2.4607   | 11.1626  | -2.1815 | Down | 2.45E-11  | 7.53E-11  |
| Unigene25180  | Potri.012G092500.4 | 13.8057  | 62.6263  | -2.1815 | Down | 1.08E-60  | 1.30E-59  |
| Unigene47957  | Potri.001G028200.1 | 1.6914   | 7.6726   | -2.1815 | Down | 2.81E-21  | 1.30E-20  |

|               |                    |         |          |         |      |           |           |
|---------------|--------------------|---------|----------|---------|------|-----------|-----------|
| Unigene7704   | Potri.009G106700.5 | 3.1385  | 14.2404  | -2.1818 | Down | 1.42E-28  | 8.27E-28  |
| Unigene117101 | Potri.008G130100.1 | 5.622   | 25.5089  | -2.1818 | Down | 1.42E-28  | 8.27E-28  |
| Unigene23328  | Potri.T004100.1    | 2.7708  | 12.5722  | -2.1819 | Down | 1.42E-28  | 8.27E-28  |
| Unigene214    | Potri.006G072900.1 | 5.9372  | 26.9406  | -2.1819 | Down | 1.08E-89  | 2.01E-88  |
| Unigene41021  | Potri.002G237200.1 | 12.8359 | 58.2441  | -2.1819 | Down | 1.06E-45  | 9.41E-45  |
| Unigene73204  | Potri.012G095400.1 | 20.0707 | 91.0865  | -2.1821 | Down | 3.20E-60  | 3.81E-59  |
| Unigene49318  | Potri.010G098700.1 | 12.9529 | 58.7919  | -2.1823 | Down | 1.20E-57  | 1.37E-56  |
| Unigene43     | Potri.005G246700.2 | 16.128  | 73.2133  | -2.1825 | Down | 0         | 0         |
| Unigene35224  | Potri.001G082100.1 | 41.1498 | 186.7964 | -2.1825 | Down | 1.09E-178 | 4.92E-177 |
| Unigene208    | Potri.001G094500.1 | 3.8688  | 17.5631  | -2.1826 | Down | 2.35E-137 | 7.52E-136 |
| Unigene82597  | Potri.001G214700.5 | 24.6291 | 111.813  | -2.1827 | Down | 2.51E-91  | 4.78E-90  |
| Unigene27179  | Potri.T021900.1    | 1.0868  | 4.9343   | -2.1828 | Down | 4.41E-16  | 1.68E-15  |
| Unigene6838   | Potri.019G020100.1 | 1.0229  | 4.6443   | -2.1828 | Down | 4.41E-16  | 1.68E-15  |
| Unigene59372  | Potri.015G117200.1 | 7.6691  | 34.82    | -2.1828 | Down | 1.66E-81  | 2.77E-80  |
| Unigene52989  | Potri.008G127300.1 | 3.9862  | 18.0987  | -2.1828 | Down | 4.41E-16  | 1.68E-15  |
| Unigene27225  | Potri.006G240500.7 | 1.01    | 4.5859   | -2.1828 | Down | 1.04E-08  | 2.76E-08  |
| Unigene32261  | Potri.003G141600.1 | 3.7538  | 17.0434  | -2.1828 | Down | 5.25E-67  | 7.05E-66  |
| Unigene33939  | Potri.009G132900.1 | 12.1584 | 55.2084  | -2.1829 | Down | 1.98E-93  | 3.88E-92  |
| Unigene27027  | Potri.004G084900.1 | 1.0159  | 4.6127   | -2.1829 | Down | 1.04E-08  | 2.76E-08  |
| Unigene45122  | Potri.005G075000.1 | 11.1035 | 50.4198  | -2.183  | Down | 1.48E-141 | 4.89E-140 |
| Unigene101089 | Potri.014G157000.1 | 2.5293  | 11.4864  | -2.1831 | Down | 1.18E-42  | 9.86E-42  |
| Unigene31807  | Potri.019G014300.1 | 5.1195  | 23.2531  | -2.1833 | Down | 6.61E-165 | 2.70E-163 |
| Unigene25751  | Potri.014G023200.3 | 2.8752  | 13.0602  | -2.1834 | Down | 8.35E-21  | 3.82E-20  |
| Unigene83251  | Potri.002G072900.2 | 17.3972 | 79.0209  | -2.1834 | Down | 1.55E-66  | 2.06E-65  |
| Unigene88663  | Potri.012G077300.1 | 45.7968 | 208.0595 | -2.1837 | Down | 9.93E-217 | 5.67E-215 |
| Unigene21934  | Potri.010G064500.1 | 1.9171  | 8.7105   | -2.1838 | Down | 1.63E-25  | 8.66E-25  |
| Unigene85251  | Potri.008G170300.1 | 2.9892  | 13.5818  | -2.1838 | Down | 1.78E-13  | 6.08E-13  |
| Unigene39080  | Potri.010G052200.1 | 5.5348  | 25.1482  | -2.1839 | Down | 1.63E-25  | 8.66E-25  |
| Unigene23074  | Potri.006G144500.1 | 16.6043 | 75.4445  | -2.1839 | Down | 2.56E-73  | 3.79E-72  |
| Unigene104643 | Potri.001G104800.4 | 1.1098  | 5.0426   | -2.1839 | Down | 1.78E-13  | 6.08E-13  |
| Unigene22542  | Potri.009G075300.2 | 3.1177  | 14.1686  | -2.1841 | Down | 3.24E-30  | 1.98E-29  |
| Unigene66131  | Potri.006G132300.1 | 6.4132  | 29.1462  | -2.1842 | Down | 7.19E-47  | 6.58E-46  |
| Unigene49396  | Potri.001G244600.2 | 22.4025 | 101.8107 | -2.1842 | Down | 6.11E-104 | 1.37E-102 |
| Unigene8586   | Potri.005G203000.1 | 2.2436  | 10.1974  | -2.1843 | Down | 6.53E-35  | 4.51E-34  |
| Unigene34571  | Potri.012G066600.3 | 4.3048  | 19.5694  | -2.1846 | Down | 7.06E-87  | 1.27E-85  |
| Unigene72530  | Potri.007G065600.1 | 92.438  | 420.2945 | -2.1848 | Down | 7.92E-268 | 6.00E-266 |
| Unigene94629  | Potri.005G220500.5 | 2.1703  | 9.868    | -2.1849 | Down | 2.50E-32  | 1.62E-31  |
| Unigene48636  | Potri.013G031200.1 | 16.365  | 74.417   | -2.185  | Down | 9.86E-82  | 1.65E-80  |
| Unigene67012  | Potri.018G129900.2 | 3.0334  | 13.7985  | -2.1855 | Down | 1.32E-15  | 4.93E-15  |

|               |                     |          |          |         |      |           |           |
|---------------|---------------------|----------|----------|---------|------|-----------|-----------|
| Unigene105817 | Potri.017G042500.1  | 1.1576   | 5.2656   | -2.1855 | Down | 4.72E-06  | 1.03E-05  |
| Unigene45910  | Potri.014G180700.1  | 0.8542   | 3.8856   | -2.1855 | Down | 4.72E-06  | 1.03E-05  |
| Unigene89337  | Potri.014G146300.1  | 1.902    | 8.6518   | -2.1855 | Down | 7.38E-11  | 2.21E-10  |
| Unigene102385 | Potri.014G128600.7  | 3.2356   | 14.7184  | -2.1855 | Down | 2.49E-20  | 1.12E-19  |
| Unigene26140  | Potri.012G143600.1  | 1.1227   | 5.1071   | -2.1855 | Down | 4.72E-06  | 1.03E-05  |
| Unigene4594   | Potri.012G075900.1  | 1.447    | 6.5821   | -2.1855 | Down | 4.72E-06  | 1.03E-05  |
| Unigene29917  | Potri.012G018800.1  | 0.8881   | 4.0398   | -2.1855 | Down | 4.72E-06  | 1.03E-05  |
| Unigene62999  | Potri.010G126900.1  | 3.0611   | 13.9244  | -2.1855 | Down | 1.32E-15  | 4.93E-15  |
| Unigene23105  | Potri.004G161800.3  | 1.627    | 7.4008   | -2.1855 | Down | 1.32E-15  | 4.93E-15  |
| Unigene114459 | Potri.004G069400.1  | 1.2433   | 5.6557   | -2.1855 | Down | 4.72E-06  | 1.03E-05  |
| Unigene115819 | Potri.001G273100.1  | 1.119    | 5.0901   | -2.1855 | Down | 4.72E-06  | 1.03E-05  |
| Unigene116262 | Potri.001G188800.3  | 1.0725   | 4.8787   | -2.1855 | Down | 4.72E-06  | 1.03E-05  |
| Unigene116944 | Potri.001G123100.1  | 0.9932   | 4.5179   | -2.1855 | Down | 4.72E-06  | 1.03E-05  |
| Unigene118399 | Potri.001G057100.2  | 0.7682   | 3.4944   | -2.1855 | Down | 4.72E-06  | 1.03E-05  |
| Unigene61682  | Potri.001G015400.2  | 1.0623   | 4.8324   | -2.1855 | Down | 4.72E-06  | 1.03E-05  |
| Unigene52013  | Potri.004G040400.1  | 17.8606  | 81.2654  | -2.1859 | Down | 1.64E-113 | 4.12E-112 |
| Unigene48655  | Potri.017G028300.3  | 18.592   | 84.6004  | -2.186  | Down | 4.34E-169 | 1.82E-167 |
| Unigene23738  | Potri.005G146500.1  | 1.7423   | 7.9284   | -2.186  | Down | 3.06E-41  | 2.47E-40  |
| Unigene81349  | Potri.004G065800.4  | 18.3561  | 83.5346  | -2.1861 | Down | 9.21E-67  | 1.23E-65  |
| Unigene4066   | Potri.019G112400.1  | 30.7004  | 139.7209 | -2.1862 | Down | 4.83E-113 | 1.20E-111 |
| Unigene32010  | Potri.004G163600.2  | 2.611    | 11.8833  | -2.1863 | Down | 1.01E-52  | 1.05E-51  |
| Unigene25234  | Potri.018G058000.1  | 6.2426   | 28.4155  | -2.1865 | Down | 1.89E-22  | 9.08E-22  |
| Unigene32878  | Potri.004G039100.1  | 1.9303   | 8.7873   | -2.1866 | Down | 7.95E-55  | 8.55E-54  |
| Unigene39159  | Potri.018G113100.1  | 3.1506   | 14.344   | -2.1867 | Down | 9.83E-18  | 4.02E-17  |
| Unigene14942  | Potri.007G071100.4  | 3.8543   | 17.5475  | -2.1867 | Down | 9.83E-18  | 4.02E-17  |
| Unigene31762  | Potri.001G146400.1  | 8.5969   | 39.1395  | -2.1867 | Down | 5.72E-34  | 3.86E-33  |
| Unigene50446  | Potri.006G047100.4  | 2.689    | 12.2425  | -2.1868 | Down | 9.83E-18  | 4.02E-17  |
| Unigene14597  | Potri.011G154600.1  | 8.6551   | 39.4081  | -2.1869 | Down | 1.85E-45  | 1.64E-44  |
| Unigene44304  | Potri.002G143200.1  | 4.9575   | 22.5724  | -2.1869 | Down | 1.85E-45  | 1.64E-44  |
| Unigene19502  | Potri.003G078800.1  | 2.984    | 13.5899  | -2.1872 | Down | 5.35E-13  | 1.78E-12  |
| Unigene2319   | Potri.010G180400.7  | 6.3015   | 28.7037  | -2.1875 | Down | 1.32E-72  | 1.94E-71  |
| Unigene51623  | Potri.005G128900.1  | 14.0983  | 64.2246  | -2.1876 | Down | 6.30E-68  | 8.57E-67  |
| Unigene26064  | Potri.010G033100.1  | 109.8631 | 500.537  | -2.1878 | Down | 0         | 0         |
| Unigene88159  | Potri.004G125000.10 | 29.7942  | 135.7476 | -2.1878 | Down | 2.95E-138 | 9.50E-137 |
| Unigene60890  | Potri.001G345300.1  | 4.6992   | 21.411   | -2.1879 | Down | 1.10E-26  | 6.06E-26  |
| Unigene9791   | Potri.008G032900.1  | 15.3162  | 69.7902  | -2.188  | Down | 2.27E-90  | 4.27E-89  |
| Unigene47502  | Potri.010G211100.2  | 8.2393   | 37.5462  | -2.1881 | Down | 2.67E-40  | 2.11E-39  |
| Unigene12930  | Potri.010G189700.1  | 8.5354   | 38.8978  | -2.1882 | Down | 6.92E-54  | 7.31E-53  |
| Unigene9760   | Potri.019G133000.6  | 1.1303   | 5.1519   | -2.1884 | Down | 3.17E-08  | 8.13E-08  |

|               |                    |         |          |         |      |           |           |
|---------------|--------------------|---------|----------|---------|------|-----------|-----------|
| Unigene114020 | Potri.014G017000.2 | 7.3748  | 33.615   | -2.1884 | Down | 8.44E-29  | 4.95E-28  |
| Unigene38293  | Potri.008G193500.1 | 8.5319  | 38.8889  | -2.1884 | Down | 2.08E-42  | 1.72E-41  |
| Unigene52039  | Potri.008G092300.1 | 1.7318  | 7.8935   | -2.1884 | Down | 3.17E-08  | 8.13E-08  |
| Unigene27861  | Potri.003G093300.2 | 1.7601  | 8.0225   | -2.1884 | Down | 3.94E-15  | 1.44E-14  |
| Unigene44563  | Potri.002G239800.3 | 1.2965  | 5.9096   | -2.1884 | Down | 3.94E-15  | 1.44E-14  |
| Unigene118707 | Potri.006G240200.1 | 1.0208  | 4.653    | -2.1885 | Down | 3.17E-08  | 8.14E-08  |
| Unigene32390  | Potri.009G168100.3 | 26.2531 | 119.6798 | -2.1886 | Down | 7.57E-288 | 6.36E-286 |
| Unigene43240  | Potri.002G143300.1 | 12.9336 | 58.9715  | -2.1889 | Down | 2.40E-235 | 1.52E-233 |
| Unigene48549  | Potri.014G159300.4 | 13.0023 | 59.2873  | -2.189  | Down | 2.04E-53  | 2.14E-52  |
| Unigene38955  | Potri.T124300.1    | 28.4321 | 129.6542 | -2.1891 | Down | 0         | 0         |
| Unigene27623  | Potri.019G101800.1 | 2.1328  | 9.7257   | -2.1891 | Down | 4.27E-24  | 2.17E-23  |
| Unigene48259  | Potri.012G103300.1 | 4.7215  | 21.5338  | -2.1893 | Down | 2.93E-17  | 1.18E-16  |
| Unigene38656  | Potri.011G071300.2 | 1.5224  | 6.9436   | -2.1893 | Down | 2.93E-17  | 1.18E-16  |
| Unigene23016  | Potri.004G157700.1 | 3.3957  | 15.491   | -2.1896 | Down | 3.88E-35  | 2.69E-34  |
| Unigene87566  | Potri.008G144500.3 | 85.7772 | 391.3304 | -2.1897 | Down | 0         | 0         |
| Unigene50318  | Potri.019G077800.1 | 0.9137  | 4.1691   | -2.1899 | Down | 2.23E-10  | 6.49E-10  |
| Unigene104894 | Potri.014G005000.4 | 0.9521  | 4.3443   | -2.1899 | Down | 2.23E-10  | 6.49E-10  |
| Unigene21311  | Potri.010G135900.1 | 7.7648  | 35.4294  | -2.1899 | Down | 4.91E-257 | 3.52E-255 |
| Unigene3278   | Potri.017G108600.1 | 0.9666  | 4.4106   | -2.19   | Down | 2.23E-10  | 6.49E-10  |
| Unigene104566 | Potri.014G141700.1 | 1.3491  | 6.156    | -2.19   | Down | 2.23E-10  | 6.49E-10  |
| Unigene114730 | Potri.010G171500.1 | 2.3058  | 10.5212  | -2.19   | Down | 2.23E-10  | 6.49E-10  |
| Unigene53565  | Potri.007G080400.3 | 5.9261  | 27.0405  | -2.19   | Down | 2.20E-19  | 9.59E-19  |
| Unigene20829  | Potri.007G003200.7 | 8.4772  | 38.6809  | -2.19   | Down | 3.73E-46  | 3.36E-45  |
| Unigene118193 | Potri.004G159700.1 | 1.5316  | 6.9887   | -2.19   | Down | 2.23E-10  | 6.49E-10  |
| Unigene2373   | Potri.002G238200.1 | 20.7637 | 94.744   | -2.19   | Down | 3.15E-117 | 8.24E-116 |
| Unigene55638  | Potri.012G127500.1 | 144.235 | 658.1948 | -2.1901 | Down | 0         | 0         |
| Unigene50705  | Potri.006G184800.1 | 3.6638  | 16.721   | -2.1902 | Down | 2.33E-39  | 1.80E-38  |
| Unigene104898 | Potri.004G007600.2 | 1.1134  | 5.0823   | -2.1905 | Down | 1.67E-21  | 7.79E-21  |
| Unigene108505 | Potri.001G405800.1 | 6.8143  | 31.1049  | -2.1905 | Down | 1.67E-21  | 7.79E-21  |
| Unigene1901   | Potri.016G092600.1 | 2.2065  | 10.0746  | -2.1909 | Down | 1.27E-23  | 6.35E-23  |
| Unigene50590  | Potri.010G055200.3 | 1.0094  | 4.6089   | -2.1909 | Down | 1.61E-12  | 5.23E-12  |
| Unigene104469 | Potri.009G167500.1 | 2.3808  | 10.8708  | -2.1909 | Down | 1.61E-12  | 5.23E-12  |
| Unigene33252  | Potri.007G002700.1 | 2.9227  | 13.3451  | -2.1909 | Down | 1.15E-34  | 7.88E-34  |
| Unigene116194 | Potri.001G308900.1 | 2.5186  | 11.4999  | -2.1909 | Down | 1.61E-12  | 5.23E-12  |
| Unigene29502  | Potri.016G094700.5 | 4.6023  | 21.0177  | -2.1912 | Down | 8.89E-37  | 6.46E-36  |
| Unigene38414  | Potri.016G001700.3 | 9.9642  | 45.5052  | -2.1912 | Down | 6.72E-61  | 8.11E-60  |
| Unigene12991  | Potri.002G154700.1 | 7.0247  | 32.0812  | -2.1912 | Down | 6.72E-61  | 8.11E-60  |
| Unigene45214  | Potri.011G151500.1 | 45.8314 | 209.352  | -2.1915 | Down | 0         | 0         |
| Unigene104580 | Potri.014G148700.5 | 1.9467  | 8.8928   | -2.1916 | Down | 1.18E-14  | 4.23E-14  |

|               |                     |         |          |         |      |           |           |
|---------------|---------------------|---------|----------|---------|------|-----------|-----------|
| Unigene94109  | Potri.011G091200.1  | 38.5495 | 176.0931 | -2.1916 | Down | 0         | 0         |
| Unigene26305  | Potri.010G154000.1  | 14.2582 | 65.132   | -2.1916 | Down | 3.26E-67  | 4.38E-66  |
| Unigene104036 | Potri.005G085200.1  | 3.2719  | 14.9461  | -2.1916 | Down | 7.42E-28  | 4.23E-27  |
| Unigene33619  | Potri.005G144800.2  | 10.5307 | 48.1097  | -2.1917 | Down | 6.20E-139 | 2.01E-137 |
| Unigene24726  | Potri.005G034100.1  | 6.2562  | 28.5818  | -2.1917 | Down | 4.18E-43  | 3.52E-42  |
| Unigene9019   | Potri.003G038700.1  | 19.7412 | 90.1866  | -2.1917 | Down | 1.11E-110 | 2.71E-109 |
| Unigene50100  | Potri.001G228100.1  | 4.7266  | 21.5926  | -2.1917 | Down | 2.56E-69  | 3.56E-68  |
| Unigene32192  | Potri.010G176700.1  | 3.2897  | 15.0295  | -2.1918 | Down | 2.01E-71  | 2.89E-70  |
| Unigene44353  | Potri.008G171400.2  | 11.2377 | 51.3478  | -2.192  | Down | 1.25E-75  | 1.92E-74  |
| Unigene289    | Potri.005G048900.1  | 8.1417  | 37.2037  | -2.192  | Down | 4.15E-108 | 9.76E-107 |
| Unigene53430  | Potri.003G023000.1  | 13.4093 | 61.2741  | -2.192  | Down | 2.54E-47  | 2.35E-46  |
| Unigene65555  | Potri.007G095200.10 | 3.5678  | 16.307   | -2.1924 | Down | 6.56E-19  | 2.81E-18  |
| Unigene100462 | Potri.006G266000.2  | 1.6239  | 7.4221   | -2.1924 | Down | 6.56E-19  | 2.81E-18  |
| Unigene45625  | Potri.006G078000.1  | 5.5545  | 25.3878  | -2.1924 | Down | 3.00E-88  | 5.49E-87  |
| Unigene21466  | Potri.006G044700.1  | 6.5984  | 30.1583  | -2.1924 | Down | 1.30E-241 | 8.58E-240 |
| Unigene17300  | Potri.015G002200.5  | 10.702  | 48.9174  | -2.1925 | Down | 4.67E-73  | 6.88E-72  |
| Unigene50894  | Potri.001G131400.1  | 22.806  | 104.2519 | -2.1926 | Down | 6.05E-114 | 1.52E-112 |
| Unigene37785  | Potri.003G018900.1  | 25.7285 | 117.6224 | -2.1927 | Down | 7.27E-101 | 1.57E-99  |
| Unigene11672  | Potri.001G161500.1  | 6.8972  | 31.5322  | -2.1927 | Down | 4.19E-161 | 1.65E-159 |
| Unigene86701  | Potri.001G358300.1  | 44.148  | 201.8483 | -2.1929 | Down | 5.64E-191 | 2.78E-189 |
| Unigene62315  | Potri.003G161700.1  | 11.7299 | 53.6409  | -2.1931 | Down | 1.08E-74  | 1.64E-73  |
| Unigene10695  | Potri.002G238200.1  | 9.4677  | 43.2938  | -2.1931 | Down | 6.17E-167 | 2.55E-165 |
| Unigene19882  | Potri.006G178200.1  | 16.1741 | 73.9692  | -2.1932 | Down | 3.58E-53  | 3.73E-52  |
| Unigene91712  | Potri.013G078200.3  | 13.6336 | 62.3564  | -2.1934 | Down | 3.30E-85  | 5.81E-84  |
| Unigene15628  | Potri.009G012400.3  | 7.876   | 36.0226  | -2.1934 | Down | 1.69E-29  | 1.01E-28  |
| Unigene46995  | Potri.006G110700.1  | 9.3691  | 42.8515  | -2.1934 | Down | 1.69E-29  | 1.01E-28  |
| Unigene12058  | Potri.006G012300.1  | 3.5142  | 16.0741  | -2.1935 | Down | 1.30E-31  | 8.27E-31  |
| Unigene43112  | Potri.006G258300.1  | 4.4295  | 20.263   | -2.1936 | Down | 6.56E-68  | 8.92E-67  |
| Unigene2540   | Potri.005G242300.1  | 2.6894  | 12.3026  | -2.1936 | Down | 1.01E-33  | 6.75E-33  |
| Unigene2438   | Potri.005G187400.1  | 4.8377  | 22.1321  | -2.1937 | Down | 6.04E-38  | 4.51E-37  |
| Unigene40343  | Potri.003G128500.4  | 24.5137 | 112.1956 | -2.1944 | Down | 8.66E-148 | 3.05E-146 |
| Unigene86065  | Potri.002G239900.1  | 54.0027 | 247.1999 | -2.1946 | Down | 1.36E-227 | 8.27E-226 |
| Unigene52009  | Potri.018G135600.1  | 1.412   | 6.4651   | -2.1949 | Down | 9.65E-08  | 2.39E-07  |
| Unigene12249  | Potri.018G124400.2  | 1.1865  | 5.4326   | -2.1949 | Down | 6.72E-10  | 1.91E-09  |
| Unigene106704 | Potri.016G063800.3  | 0.921   | 4.217    | -2.1949 | Down | 6.72E-10  | 1.91E-09  |
| Unigene4764   | Potri.014G084600.1  | 1.3815  | 6.3254   | -2.1949 | Down | 1.46E-05  | 3.05E-05  |
| Unigene27015  | Potri.012G116000.1  | 1.1477  | 5.255    | -2.1949 | Down | 1.46E-05  | 3.05E-05  |
| Unigene102456 | Potri.007G028600.1  | 2.4815  | 11.3621  | -2.1949 | Down | 1.95E-18  | 8.21E-18  |
| Unigene46818  | Potri.006G006500.1  | 1.3157  | 6.0242   | -2.1949 | Down | 4.82E-12  | 1.53E-11  |

|               |                    |         |         |         |      |           |           |
|---------------|--------------------|---------|---------|---------|------|-----------|-----------|
| Unigene28439  | Potri.003G056000.1 | 1.2538  | 5.7407  | -2.1949 | Down | 9.65E-08  | 2.39E-07  |
| Unigene31700  | Potri.002G261800.2 | 0.7423  | 3.3987  | -2.1949 | Down | 1.46E-05  | 3.05E-05  |
| Unigene106762 | Potri.001G304200.1 | 0.6646  | 3.043   | -2.1949 | Down | 1.46E-05  | 3.05E-05  |
| Unigene46399  | Potri.001G012300.1 | 1.4797  | 6.775   | -2.1949 | Down | 3.53E-14  | 1.24E-13  |
| Unigene7233   | Potri.T164000.2    | 0.822   | 3.7639  | -2.195  | Down | 6.72E-10  | 1.91E-09  |
| Unigene72801  | Potri.019G100600.1 | 7.173   | 32.8437 | -2.195  | Down | 1.12E-22  | 5.43E-22  |
| Unigene71184  | Potri.018G122300.2 | 19.2037 | 87.93   | -2.195  | Down | 1.91E-56  | 2.13E-55  |
| Unigene10284  | Potri.018G108000.1 | 1.3401  | 6.1361  | -2.195  | Down | 9.65E-08  | 2.39E-07  |
| Unigene40391  | Potri.018G102600.1 | 0.7866  | 3.6018  | -2.195  | Down | 9.65E-08  | 2.39E-07  |
| Unigene6352   | Potri.017G056900.3 | 3.2863  | 15.0473 | -2.195  | Down | 4.82E-12  | 1.53E-11  |
| Unigene13151  | Potri.014G168600.1 | 17.6351 | 80.7474 | -2.195  | Down | 3.02E-134 | 9.38E-133 |
| Unigene97394  | Potri.014G139000.4 | 2.2563  | 10.3312 | -2.195  | Down | 1.95E-18  | 8.21E-18  |
| Unigene9845   | Potri.013G079800.1 | 4.3882  | 20.0926 | -2.195  | Down | 1.12E-22  | 5.43E-22  |
| Unigene58037  | Potri.012G123500.1 | 1.4142  | 6.4753  | -2.195  | Down | 1.46E-05  | 3.05E-05  |
| Unigene9945   | Potri.012G117300.1 | 1.2996  | 5.9508  | -2.195  | Down | 4.82E-12  | 1.53E-11  |
| Unigene27903  | Potri.012G052500.2 | 2.1623  | 9.9007  | -2.195  | Down | 2.61E-16  | 1.01E-15  |
| Unigene28289  | Potri.011G169100.1 | 1.9946  | 9.133   | -2.195  | Down | 4.82E-12  | 1.53E-11  |
| Unigene11179  | Potri.011G136900.1 | 2.9038  | 13.2958 | -2.195  | Down | 4.14E-90  | 7.76E-89  |
| Unigene38960  | Potri.011G121800.1 | 8.5746  | 39.2614 | -2.195  | Down | 2.44E-54  | 2.60E-53  |
| Unigene37512  | Potri.011G045600.1 | 0.6907  | 3.1627  | -2.195  | Down | 1.46E-05  | 3.05E-05  |
| Unigene45172  | Potri.010G092300.1 | 3.2047  | 14.6738 | -2.195  | Down | 1.47E-20  | 6.68E-20  |
| Unigene96151  | Potri.008G068600.1 | 0.9238  | 4.23    | -2.195  | Down | 6.72E-10  | 1.91E-09  |
| Unigene16866  | Potri.006G143500.1 | 1.1218  | 5.1365  | -2.195  | Down | 1.46E-05  | 3.05E-05  |
| Unigene23367  | Potri.006G004900.2 | 2.8239  | 12.9303 | -2.195  | Down | 6.52E-27  | 3.62E-26  |
| Unigene6075   | Potri.005G251000.5 | 1.3381  | 6.1269  | -2.195  | Down | 1.46E-05  | 3.05E-05  |
| Unigene105242 | Potri.005G245200.1 | 0.9153  | 4.1911  | -2.195  | Down | 9.65E-08  | 2.39E-07  |
| Unigene15595  | Potri.005G054700.1 | 1.0482  | 4.7996  | -2.195  | Down | 9.65E-08  | 2.39E-07  |
| Unigene99570  | Potri.004G157400.1 | 1.2752  | 5.8389  | -2.195  | Down | 9.65E-08  | 2.39E-07  |
| Unigene91120  | Potri.004G087300.1 | 15.3964 | 70.4969 | -2.195  | Down | 4.14E-90  | 7.76E-89  |
| Unigene47547  | Potri.003G216800.1 | 2.1781  | 9.973   | -2.195  | Down | 1.12E-22  | 5.43E-22  |
| Unigene83891  | Potri.003G161700.1 | 11.4349 | 52.3581 | -2.195  | Down | 6.54E-46  | 5.86E-45  |
| Unigene47180  | Potri.003G157900.1 | 3.73    | 17.0787 | -2.195  | Down | 4.82E-12  | 1.53E-11  |
| Unigene9304   | Potri.002G137800.2 | 2.4359  | 11.1534 | -2.195  | Down | 6.72E-10  | 1.91E-09  |
| Unigene34342  | Potri.002G127100.3 | 4.4371  | 20.3167 | -2.195  | Down | 2.30E-35  | 1.61E-34  |
| Unigene45691  | Potri.002G123500.1 | 0.6558  | 3.0029  | -2.195  | Down | 1.46E-05  | 3.05E-05  |
| Unigene118277 | Potri.001G423600.1 | 0.7054  | 3.23    | -2.195  | Down | 1.46E-05  | 3.05E-05  |
| Unigene20814  | Potri.001G334700.1 | 4.7066  | 21.5504 | -2.195  | Down | 1.12E-22  | 5.43E-22  |
| Unigene119535 | Potri.001G266700.1 | 2.1721  | 9.9457  | -2.195  | Down | 2.30E-35  | 1.61E-34  |
| Unigene106271 | Potri.001G218700.5 | 1.1134  | 5.0981  | -2.195  | Down | 6.72E-10  | 1.91E-09  |



|               |                    |         |          |         |      |           |           |
|---------------|--------------------|---------|----------|---------|------|-----------|-----------|
| Unigene33653  | Potri.001G252500.1 | 20.3149 | 93.0308  | -2.1952 | Down | 3.47E-226 | 2.09E-224 |
| Unigene21330  | Potri.017G112600.2 | 14.1521 | 64.8393  | -2.1959 | Down | 8.34E-256 | 5.94E-254 |
| Unigene33280  | Potri.008G187300.1 | 5.6477  | 25.8763  | -2.1959 | Down | 1.18E-49  | 1.14E-48  |
| Unigene105069 | Potri.007G081300.1 | 4.2643  | 19.5401  | -2.1961 | Down | 2.48E-43  | 2.10E-42  |
| Unigene34187  | Potri.002G183700.2 | 6.7023  | 30.7145  | -2.1962 | Down | 1.90E-74  | 2.86E-73  |
| Unigene4235   | Potri.010G137600.1 | 7.0779  | 32.4387  | -2.1963 | Down | 6.81E-35  | 4.70E-34  |
| Unigene34383  | Potri.005G119900.1 | 4.2036  | 19.2646  | -2.1963 | Down | 2.41E-72  | 3.51E-71  |
| Unigene78164  | Potri.004G025900.2 | 9.3646  | 42.9212  | -2.1964 | Down | 8.81E-33  | 5.78E-32  |
| Unigene9065   | Potri.018G107800.1 | 2.7136  | 12.4383  | -2.1965 | Down | 1.14E-30  | 7.07E-30  |
| Unigene78840  | Potri.010G201100.1 | 33.0858 | 151.6613 | -2.1966 | Down | 1.85E-113 | 4.64E-112 |
| Unigene51189  | Potri.002G149200.1 | 6.3409  | 29.0673  | -2.1966 | Down | 1.48E-28  | 8.64E-28  |
| Unigene9243   | Potri.012G048700.1 | 34.5075 | 158.1955 | -2.1967 | Down | 1.46E-255 | 1.04E-253 |
| Unigene15494  | Potri.007G064300.1 | 5.6551  | 25.9259  | -2.1968 | Down | 1.93E-26  | 1.06E-25  |
| Unigene30412  | Potri.007G007600.3 | 12.4774 | 57.2031  | -2.1968 | Down | 2.72E-51  | 2.73E-50  |
| Unigene1314   | Potri.001G345200.1 | 4.4103  | 20.219   | -2.1968 | Down | 2.72E-51  | 2.73E-50  |
| Unigene93717  | Potri.006G066800.1 | 32.0135 | 146.7912 | -2.197  | Down | 1.20E-285 | 9.96E-284 |
| Unigene44264  | Potri.018G055400.1 | 7.2977  | 33.4653  | -2.1972 | Down | 1.86E-63  | 2.35E-62  |
| Unigene34069  | Potri.009G021000.2 | 5.2675  | 24.1571  | -2.1973 | Down | 9.42E-41  | 7.51E-40  |
| Unigene30892  | Potri.012G081800.1 | 4.4556  | 20.4355  | -2.1974 | Down | 4.39E-20  | 1.96E-19  |
| Unigene40186  | Potri.008G221500.2 | 2.3779  | 10.9064  | -2.1974 | Down | 4.39E-20  | 1.96E-19  |
| Unigene118    | Potri.002G130700.1 | 8.813   | 40.425   | -2.1975 | Down | 1.55E-210 | 8.56E-209 |
| Unigene44536  | Potri.015G067200.1 | 13.7028 | 62.8551  | -2.1976 | Down | 2.45E-157 | 9.34E-156 |
| Unigene52532  | Potri.015G134600.3 | 2.9573  | 13.5664  | -2.1977 | Down | 5.83E-18  | 2.40E-17  |
| Unigene28925  | Potri.003G038900.1 | 3.4413  | 15.787   | -2.1977 | Down | 5.83E-18  | 2.40E-17  |
| Unigene8794   | Potri.002G045000.1 | 6.9866  | 32.051   | -2.1977 | Down | 3.39E-67  | 4.56E-66  |
| Unigene108193 | Potri.001G109500.1 | 5.6404  | 25.8754  | -2.1977 | Down | 5.83E-18  | 2.40E-17  |
| Unigene32279  | Potri.014G105900.2 | 4.788   | 21.9677  | -2.1979 | Down | 2.46E-185 | 1.17E-183 |
| Unigene52927  | Potri.001G358800.1 | 2.2234  | 10.2012  | -2.1979 | Down | 2.61E-32  | 1.69E-31  |
| Unigene72650  | Potri.011G053700.1 | 9.6835  | 44.4356  | -2.1981 | Down | 3.38E-30  | 2.06E-29  |
| Unigene87620  | Potri.007G089000.1 | 25.2561 | 115.8946 | -2.1981 | Down | 8.70E-116 | 2.24E-114 |
| Unigene92948  | Potri.002G004500.1 | 36.5105 | 167.5414 | -2.1981 | Down | 3.05E-270 | 2.34E-268 |
| Unigene11378  | Potri.018G060300.2 | 9.0143  | 41.368   | -2.1982 | Down | 1.96E-166 | 8.08E-165 |
| Unigene42503  | Potri.014G194800.1 | 10.3838 | 47.6555  | -2.1983 | Down | 3.11E-162 | 1.24E-160 |
| Unigene20258  | Potri.006G279900.1 | 7.8903  | 36.2108  | -2.1983 | Down | 2.17E-42  | 1.80E-41  |
| Unigene35453  | Potri.018G082900.5 | 2.7854  | 12.7862  | -2.1986 | Down | 1.06E-13  | 3.63E-13  |
| Unigene29784  | Potri.004G181100.1 | 2.1078  | 9.676    | -2.1987 | Down | 3.58E-38  | 2.69E-37  |
| Unigene10521  | Potri.005G193100.1 | 7.5498  | 34.6658  | -2.199  | Down | 3.88E-46  | 3.50E-45  |
| Unigene23828  | Potri.004G050200.1 | 3.036   | 13.9402  | -2.199  | Down | 7.51E-24  | 3.79E-23  |
| Unigene4267   | Potri.002G221600.1 | 3.1269  | 14.3576  | -2.199  | Down | 7.51E-24  | 3.79E-23  |

|               |                    |         |         |         |      |           |           |
|---------------|--------------------|---------|---------|---------|------|-----------|-----------|
| Unigene43516  | Potri.001G005500.1 | 5.6493  | 25.9389 | -2.199  | Down | 3.14E-169 | 1.32E-167 |
| Unigene45291  | Potri.013G019000.2 | 3.3509  | 15.3876 | -2.1991 | Down | 5.97E-34  | 4.03E-33  |
| Unigene76747  | Potri.014G112700.2 | 12.488  | 57.3569 | -2.1994 | Down | 6.40E-42  | 5.25E-41  |
| Unigene42107  | Potri.006G026900.4 | 0.9513  | 4.3691  | -2.1994 | Down | 9.87E-22  | 4.65E-21  |
| Unigene79631  | Potri.005G256700.1 | 2.9164  | 13.3951 | -2.1994 | Down | 1.45E-11  | 4.50E-11  |
| Unigene25743  | Potri.005G181900.1 | 1.0024  | 4.604   | -2.1994 | Down | 1.45E-11  | 4.50E-11  |
| Unigene15307  | Potri.004G174600.2 | 5.211   | 23.9338 | -2.1994 | Down | 9.87E-22  | 4.65E-21  |
| Unigene43076  | Potri.001G394300.2 | 5.8877  | 27.0457 | -2.1996 | Down | 4.93E-98  | 1.03E-96  |
| Unigene25721  | Potri.007G034500.1 | 15.9692 | 73.3657 | -2.1998 | Down | 7.71E-76  | 1.19E-74  |
| Unigene25649  | Potri.019G046400.9 | 3.2352  | 14.8644 | -2.1999 | Down | 1.31E-19  | 5.73E-19  |
| Unigene111548 | Potri.017G006000.1 | 10.8392 | 49.8022 | -2.2    | Down | 1.06E-37  | 7.86E-37  |
| Unigene18142  | Potri.014G013200.1 | 6.1426  | 28.2253 | -2.2001 | Down | 1.15E-45  | 1.02E-44  |
| Unigene106378 | Potri.013G027500.3 | 2.6799  | 12.3148 | -2.2001 | Down | 1.30E-27  | 7.39E-27  |
| Unigene158    | Potri.015G100700.1 | 7.5535  | 34.712  | -2.2002 | Down | 4.04E-181 | 1.86E-179 |
| Unigene56106  | Potri.001G145300.2 | 10.478  | 48.1609 | -2.2005 | Down | 3.38E-99  | 7.18E-98  |
| Unigene4789   | Potri.012G014300.1 | 9.3695  | 43.0693 | -2.2006 | Down | 2.29E-57  | 2.59E-56  |
| Unigene52505  | Potri.007G135700.1 | 5.0709  | 23.3098 | -2.2006 | Down | 1.70E-25  | 9.04E-25  |
| Unigene45376  | Potri.006G004800.1 | 1.6312  | 7.4981  | -2.2006 | Down | 2.03E-09  | 5.61E-09  |
| Unigene32311  | Potri.005G241400.1 | 8.493   | 39.0388 | -2.2006 | Down | 4.56E-234 | 2.86E-232 |
| Unigene17496  | Potri.005G203200.1 | 0.9564  | 4.3963  | -2.2006 | Down | 2.03E-09  | 5.61E-09  |
| Unigene42366  | Potri.001G215000.2 | 3.5078  | 16.1245 | -2.2006 | Down | 1.74E-17  | 7.03E-17  |
| Unigene105319 | Potri.013G144800.1 | 1.0117  | 4.6507  | -2.2007 | Down | 1.74E-17  | 7.03E-17  |
| Unigene26936  | Potri.001G300500.1 | 19.7733 | 90.9009 | -2.2007 | Down | 5.41E-95  | 1.08E-93  |
| Unigene11144  | Potri.019G042800.1 | 7.6173  | 35.0224 | -2.2009 | Down | 1.32E-114 | 3.35E-113 |
| Unigene30687  | Potri.004G233900.2 | 12.0045 | 55.1969 | -2.201  | Down | 8.68E-91  | 1.64E-89  |
| Unigene49033  | Potri.014G039300.1 | 2.9794  | 13.7037 | -2.2015 | Down | 2.97E-29  | 1.76E-28  |
| Unigene24949  | Potri.013G159800.5 | 6.8055  | 31.3022 | -2.2015 | Down | 2.97E-29  | 1.76E-28  |
| Unigene64620  | Potri.008G056500.1 | 3.7882  | 17.4241 | -2.2015 | Down | 2.33E-15  | 8.63E-15  |
| Unigene108341 | Potri.004G030300.1 | 4.7077  | 21.6532 | -2.2015 | Down | 2.33E-15  | 8.63E-15  |
| Unigene32429  | Potri.019G018400.1 | 5.9659  | 27.4422 | -2.2016 | Down | 9.60E-63  | 1.20E-61  |
| Unigene33669  | Potri.013G041000.3 | 1.3232  | 6.0875  | -2.2018 | Down | 2.94E-21  | 1.36E-20  |
| Unigene28901  | Potri.002G221600.2 | 7.4685  | 34.3586 | -2.2018 | Down | 4.69E-94  | 9.26E-93  |
| Unigene11124  | Potri.T129800.1    | 23.0847 | 106.206 | -2.2019 | Down | 0         | 0         |
| Unigene33578  | Potri.006G232700.1 | 1.6975  | 7.8097  | -2.2019 | Down | 2.94E-21  | 1.36E-20  |
| Unigene18987  | Potri.006G251800.2 | 5.7661  | 26.5313 | -2.202  | Down | 1.10E-52  | 1.14E-51  |
| Unigene17192  | Potri.002G166700.4 | 12.9628 | 59.6471 | -2.2021 | Down | 5.20E-84  | 9.01E-83  |
| Unigene31951  | Potri.005G201400.1 | 8.5685  | 39.4387 | -2.2025 | Down | 1.34E-198 | 6.93E-197 |
| Unigene62837  | Potri.003G081400.9 | 1.6747  | 7.709   | -2.2026 | Down | 2.95E-07  | 7.06E-07  |
| Unigene53721  | Potri.012G043800.2 | 11.3073 | 52.0509 | -2.2027 | Down | 1.28E-42  | 1.07E-41  |

|               |                    |         |          |         |      |           |           |
|---------------|--------------------|---------|----------|---------|------|-----------|-----------|
| Unigene30577  | Potri.010G166100.6 | 13.4209 | 61.7801  | -2.2027 | Down | 1.28E-42  | 1.07E-41  |
| Unigene105605 | Potri.002G213500.2 | 0.7487  | 3.4465   | -2.2027 | Down | 2.95E-07  | 7.06E-07  |
| Unigene52457  | Potri.001G056000.4 | 1.6027  | 7.3778   | -2.2027 | Down | 2.95E-07  | 7.06E-07  |
| Unigene28985  | Potri.011G089800.1 | 9.454   | 43.5224  | -2.2028 | Down | 2.63E-157 | 1.01E-155 |
| Unigene43400  | Potri.005G058900.1 | 8.2637  | 38.0446  | -2.2028 | Down | 5.90E-99  | 1.25E-97  |
| Unigene12540  | Potri.001G017000.1 | 24.1614 | 111.2343 | -2.2028 | Down | 7.33E-202 | 3.85E-200 |
| Unigene26653  | Potri.010G183300.1 | 12.7462 | 58.6877  | -2.203  | Down | 3.25E-52  | 3.32E-51  |
| Unigene30405  | Potri.001G032500.1 | 9.9465  | 45.7984  | -2.203  | Down | 2.30E-46  | 2.08E-45  |
| Unigene53146  | Potri.004G001200.3 | 11.7365 | 54.0422  | -2.2031 | Down | 1.65E-40  | 1.31E-39  |
| Unigene3126   | Potri.007G025700.3 | 3.6833  | 16.9627  | -2.2033 | Down | 3.13E-77  | 4.93E-76  |
| Unigene77987  | Potri.005G160700.1 | 12.752  | 58.7322  | -2.2034 | Down | 2.96E-44  | 2.55E-43  |
| Unigene21676  | Potri.004G171600.1 | 15.8072 | 72.8015  | -2.2034 | Down | 1.98E-183 | 9.26E-182 |
| Unigene52734  | Potri.016G068000.1 | 5.6689  | 26.1115  | -2.2035 | Down | 2.12E-38  | 1.60E-37  |
| Unigene23598  | Potri.011G047500.1 | 8.6891  | 40.0221  | -2.2035 | Down | 2.87E-154 | 1.07E-152 |
| Unigene119482 | Potri.001G257700.1 | 1.7248  | 7.9441   | -2.2035 | Down | 6.62E-23  | 3.24E-22  |
| Unigene37496  | Potri.017G023500.1 | 4.2419  | 19.541   | -2.2037 | Down | 5.18E-17  | 2.06E-16  |
| Unigene88615  | Potri.006G139800.2 | 25.678  | 118.29   | -2.2037 | Down | 4.25E-125 | 1.20E-123 |
| Unigene106925 | Potri.003G077600.1 | 1.0993  | 5.064    | -2.2037 | Down | 5.18E-17  | 2.06E-16  |
| Unigene106541 | Potri.009G013000.3 | 3.948   | 18.1887  | -2.2038 | Down | 1.36E-57  | 1.54E-56  |
| Unigene866    | Potri.018G111900.2 | 9.7226  | 44.8036  | -2.2042 | Down | 8.56E-119 | 2.28E-117 |
| Unigene26160  | Potri.019G018400.1 | 6.6695  | 30.7377  | -2.2044 | Down | 2.01E-30  | 1.23E-29  |
| Unigene98     | Potri.011G148800.1 | 9.1434  | 42.1405  | -2.2044 | Down | 5.33E-283 | 4.33E-281 |
| Unigene118903 | Potri.008G039600.6 | 2.5922  | 11.947   | -2.2044 | Down | 8.73E-21  | 3.99E-20  |
| Unigene50290  | Potri.014G100200.1 | 5.1126  | 23.5651  | -2.2045 | Down | 5.70E-63  | 7.14E-62  |
| Unigene51318  | Potri.007G100200.1 | 19.2184 | 88.579   | -2.2045 | Down | 1.04E-91  | 1.99E-90  |
| Unigene13182  | Potri.017G044700.1 | 18.5121 | 85.338   | -2.2047 | Down | 6.28E-145 | 2.15E-143 |
| Unigene52623  | Potri.010G253100.3 | 8.6185  | 39.7286  | -2.2047 | Down | 3.54E-34  | 2.40E-33  |
| Unigene45550  | Potri.008G060800.1 | 3.1601  | 14.5671  | -2.2047 | Down | 3.54E-34  | 2.40E-33  |
| Unigene5020   | Potri.009G083900.1 | 30.5501 | 140.8396 | -2.2048 | Down | 3.11E-276 | 2.45E-274 |
| Unigene21436  | Potri.018G085900.1 | 3.1449  | 14.4992  | -2.2049 | Down | 4.43E-97  | 9.13E-96  |
| Unigene439    | Potri.006G274700.1 | 15.578  | 71.8212  | -2.2049 | Down | 1.97E-228 | 1.20E-226 |
| Unigene37699  | Potri.019G020100.1 | 5.9143  | 27.2716  | -2.2051 | Down | 1.12E-41  | 9.15E-41  |
| Unigene40884  | Potri.015G010400.1 | 19.7959 | 91.296   | -2.2053 | Down | 1.48E-153 | 5.45E-152 |
| Unigene44889  | Potri.009G101800.2 | 3.7169  | 17.1419  | -2.2054 | Down | 4.58E-32  | 2.94E-31  |
| Unigene41752  | Potri.014G083600.1 | 2.6233  | 12.0997  | -2.2055 | Down | 1.16E-18  | 4.90E-18  |
| Unigene1655   | Potri.006G014900.2 | 1.9567  | 9.0252   | -2.2055 | Down | 1.16E-18  | 4.90E-18  |
| Unigene23691  | Potri.018G127000.1 | 3.0826  | 14.2203  | -2.2057 | Down | 2.14E-60  | 2.56E-59  |
| Unigene10855  | Potri.018G098700.3 | 2.6067  | 12.0249  | -2.2057 | Down | 2.14E-60  | 2.56E-59  |
| Unigene279    | Potri.006G257900.4 | 1.7959  | 8.2851   | -2.2058 | Down | 2.58E-43  | 2.18E-42  |

|               |                    |         |          |         |      |           |           |
|---------------|--------------------|---------|----------|---------|------|-----------|-----------|
| Unigene51605  | Potri.001G273000.1 | 5.1041  | 23.5471  | -2.2058 | Down | 1.97E-22  | 9.47E-22  |
| Unigene23637  | Potri.001G130400.1 | 1.5709  | 7.2472   | -2.2058 | Down | 1.97E-22  | 9.47E-22  |
| Unigene49693  | Potri.017G001600.1 | 18.8745 | 87.0795  | -2.2059 | Down | 1.87E-158 | 7.22E-157 |
| Unigene39729  | Potri.017G100300.1 | 3.9263  | 18.1155  | -2.206  | Down | 3.40E-26  | 1.84E-25  |
| Unigene27926  | Potri.015G038400.1 | 1.605   | 7.4055   | -2.206  | Down | 3.40E-26  | 1.84E-25  |
| Unigene9550   | Potri.017G109900.1 | 4.7521  | 21.928   | -2.2061 | Down | 5.94E-30  | 3.60E-29  |
| Unigene90933  | Potri.007G008100.2 | 23.4055 | 107.9977 | -2.2061 | Down | 1.38E-135 | 4.32E-134 |
| Unigene36943  | Potri.005G002800.2 | 39.8719 | 183.9897 | -2.2062 | Down | 1.61E-150 | 5.79E-149 |
| Unigene36342  | Potri.001G082100.1 | 29.4181 | 135.7608 | -2.2063 | Down | 6.49E-173 | 2.79E-171 |
| Unigene5535   | Potri.015G006800.1 | 5.5314  | 25.5285  | -2.2064 | Down | 3.31E-41  | 2.68E-40  |
| Unigene2658   | Potri.001G358700.1 | 6.9007  | 31.8533  | -2.2066 | Down | 1.15E-63  | 1.45E-62  |
| Unigene16863  | Potri.010G193300.1 | 24.6382 | 113.7352 | -2.2067 | Down | 1.27E-78  | 2.04E-77  |
| Unigene34537  | Potri.006G167800.4 | 5.3711  | 24.7943  | -2.2067 | Down | 1.27E-78  | 2.04E-77  |
| Unigene6875   | Potri.002G260800.1 | 13.6258 | 62.9021  | -2.2068 | Down | 2.63E-97  | 5.43E-96  |
| Unigene24385  | Potri.019G072000.1 | 0.6963  | 3.2148   | -2.2069 | Down | 4.54E-05  | 9.03E-05  |
| Unigene9807   | Potri.018G015200.3 | 0.8185  | 3.7792   | -2.207  | Down | 4.54E-05  | 9.03E-05  |
| Unigene64047  | Potri.014G144900.1 | 6.871   | 31.7252  | -2.207  | Down | 4.45E-24  | 2.26E-23  |
| Unigene14083  | Potri.013G001300.1 | 2.5598  | 11.8192  | -2.207  | Down | 6.15E-09  | 1.65E-08  |
| Unigene39668  | Potri.011G109000.1 | 4.8723  | 22.4967  | -2.207  | Down | 2.65E-65  | 3.46E-64  |
| Unigene17358  | Potri.010G073000.1 | 2.0505  | 9.4677   | -2.207  | Down | 9.48E-13  | 3.12E-12  |
| Unigene99107  | Potri.009G153300.1 | 0.7503  | 3.4642   | -2.207  | Down | 4.54E-05  | 9.03E-05  |
| Unigene102987 | Potri.009G005700.2 | 1.2799  | 5.9096   | -2.207  | Down | 4.54E-05  | 9.03E-05  |
| Unigene5984   | Potri.008G171600.2 | 12.3878 | 57.1979  | -2.207  | Down | 2.46E-50  | 2.42E-49  |
| Unigene87769  | Potri.008G053800.1 | 0.8134  | 3.7556   | -2.207  | Down | 4.54E-05  | 9.03E-05  |
| Unigene118359 | Potri.005G242800.2 | 1.2088  | 5.5813   | -2.207  | Down | 6.15E-09  | 1.65E-08  |
| Unigene43231  | Potri.005G100900.1 | 3.0916  | 14.2746  | -2.207  | Down | 7.61E-43  | 6.37E-42  |
| Unigene45561  | Potri.005G036600.2 | 1.4152  | 6.5342   | -2.207  | Down | 6.15E-09  | 1.65E-08  |
| Unigene66048  | Potri.004G020200.1 | 4.0706  | 18.7949  | -2.207  | Down | 7.72E-28  | 4.41E-27  |
| Unigene30173  | Potri.003G203800.1 | 2.8176  | 13.0096  | -2.207  | Down | 9.48E-13  | 3.12E-12  |
| Unigene100611 | Potri.003G180600.1 | 1.2862  | 5.9387   | -2.207  | Down | 4.54E-05  | 9.03E-05  |
| Unigene42173  | Potri.003G062600.1 | 1.8069  | 8.3429   | -2.207  | Down | 6.15E-09  | 1.65E-08  |
| Unigene106548 | Potri.002G185000.1 | 1.3599  | 6.2789   | -2.207  | Down | 6.15E-09  | 1.65E-08  |
| Unigene74180  | Potri.001G060800.1 | 1.2201  | 5.6334   | -2.207  | Down | 4.54E-05  | 9.03E-05  |
| Unigene26454  | Potri.008G144400.4 | 0.9706  | 4.4816   | -2.2071 | Down | 4.54E-05  | 9.03E-05  |
| Unigene26843  | Potri.006G241000.3 | 1.5495  | 7.1546   | -2.2071 | Down | 6.15E-09  | 1.65E-08  |
| Unigene26289  | Potri.003G079600.1 | 1.0879  | 5.0232   | -2.2071 | Down | 4.54E-05  | 9.03E-05  |
| Unigene5510   | Potri.001G112100.1 | 0.6889  | 3.1809   | -2.2071 | Down | 4.54E-05  | 9.03E-05  |
| Unigene13887  | Potri.012G049200.2 | 8.7116  | 40.2391  | -2.2076 | Down | 9.80E-95  | 1.96E-93  |
| Unigene1995   | Potri.018G080400.1 | 11.7183 | 54.1304  | -2.2077 | Down | 1.59E-83  | 2.73E-82  |

|               |                    |         |          |         |      |           |           |
|---------------|--------------------|---------|----------|---------|------|-----------|-----------|
| Unigene14198  | Potri.017G054400.2 | 8.6588  | 40.0058  | -2.208  | Down | 1.76E-29  | 1.05E-28  |
| Unigene12125  | Potri.004G052000.1 | 4.5853  | 21.1851  | -2.208  | Down | 1.76E-29  | 1.05E-28  |
| Unigene13434  | Potri.004G085000.1 | 4.2547  | 19.6597  | -2.2081 | Down | 7.26E-50  | 7.07E-49  |
| Unigene598    | Potri.004G050200.1 | 5.6478  | 26.096   | -2.2081 | Down | 9.75E-102 | 2.13E-100 |
| Unigene18298  | Potri.009G124500.1 | 3.088   | 14.2706  | -2.2083 | Down | 2.25E-42  | 1.86E-41  |
| Unigene21220  | Potri.010G136100.1 | 5.9439  | 27.4747  | -2.2086 | Down | 1.77E-213 | 9.92E-212 |
| Unigene7969   | Potri.009G029300.1 | 2.8806  | 13.3155  | -2.2087 | Down | 2.31E-64  | 2.96E-63  |
| Unigene23210  | Potri.004G196100.1 | 1.303   | 6.0249   | -2.2091 | Down | 2.08E-14  | 7.40E-14  |
| Unigene97220  | Potri.011G136700.3 | 1.6132  | 7.4605   | -2.2093 | Down | 1.32E-23  | 6.61E-23  |
| Unigene80518  | Potri.010G250800.2 | 9.7368  | 45.0268  | -2.2093 | Down | 1.62E-36  | 1.17E-35  |
| Unigene21664  | Potri.008G070000.1 | 6.2207  | 28.7681  | -2.2093 | Down | 3.32E-137 | 1.06E-135 |
| Unigene73874  | Potri.006G208600.2 | 11.3825 | 52.637   | -2.2093 | Down | 1.62E-36  | 1.17E-35  |
| Unigene22621  | Potri.001G405200.2 | 4.4295  | 20.4854  | -2.2094 | Down | 1.36E-89  | 2.54E-88  |
| Unigene13413  | Potri.002G040600.1 | 3.6177  | 16.7326  | -2.2095 | Down | 9.16E-33  | 6.01E-32  |
| Unigene37653  | Potri.018G078900.1 | 1.0227  | 4.7315   | -2.2099 | Down | 1.31E-10  | 3.88E-10  |
| Unigene58308  | Potri.016G025800.1 | 2.6094  | 12.0721  | -2.2099 | Down | 1.31E-10  | 3.88E-10  |
| Unigene107764 | Potri.014G097800.2 | 3.1236  | 14.4508  | -2.2099 | Down | 1.31E-10  | 3.88E-10  |
| Unigene4704   | Potri.013G026600.1 | 1.2078  | 5.5877   | -2.2099 | Down | 1.31E-10  | 3.88E-10  |
| Unigene6941   | Potri.011G006800.1 | 1.7963  | 8.3103   | -2.2099 | Down | 1.31E-10  | 3.88E-10  |
| Unigene49973  | Potri.008G032800.2 | 2.4435  | 11.3045  | -2.2099 | Down | 7.72E-20  | 3.42E-19  |
| Unigene38000  | Potri.006G167800.4 | 1.5932  | 7.3707   | -2.2099 | Down | 1.31E-10  | 3.88E-10  |
| Unigene92594  | Potri.005G107600.2 | 23.5697 | 109.0506 | -2.21   | Down | 2.71E-167 | 1.12E-165 |
| Unigene31233  | Potri.002G154700.1 | 15.7235 | 72.7475  | -2.21   | Down | 3.14E-98  | 6.58E-97  |
| Unigene32293  | Potri.011G084000.1 | 8.1957  | 37.9276  | -2.2103 | Down | 3.98E-96  | 8.09E-95  |
| Unigene75892  | Potri.001G421300.1 | 13.5483 | 62.7105  | -2.2106 | Down | 3.52E-45  | 3.09E-44  |
| Unigene30767  | Potri.019G051300.1 | 2.8933  | 13.3951  | -2.2109 | Down | 1.74E-21  | 8.12E-21  |
| Unigene17825  | Potri.017G047600.1 | 1.5166  | 7.0214   | -2.2109 | Down | 1.74E-21  | 8.12E-21  |
| Unigene87589  | Potri.004G218300.3 | 16.5385 | 76.5794  | -2.2111 | Down | 1.92E-77  | 3.04E-76  |
| Unigene30740  | Potri.001G257000.1 | 12.8449 | 59.4794  | -2.2112 | Down | 1.41E-57  | 1.60E-56  |
| Unigene21238  | Potri.012G142700.1 | 2.8226  | 13.0713  | -2.2113 | Down | 2.71E-104 | 6.10E-103 |
| Unigene21052  | Potri.010G164100.3 | 4.6101  | 21.3504  | -2.2114 | Down | 4.51E-43  | 3.80E-42  |
| Unigene36331  | Potri.017G130600.1 | 1.6878  | 7.8188   | -2.2118 | Down | 9.02E-07  | 2.08E-06  |
| Unigene16608  | Potri.017G001300.1 | 10.9705 | 50.8225  | -2.2118 | Down | 4.30E-50  | 4.21E-49  |
| Unigene63288  | Potri.015G077600.1 | 6.3869  | 29.5884  | -2.2118 | Down | 1.54E-28  | 8.98E-28  |
| Unigene35506  | Potri.012G097600.1 | 1.7349  | 8.037    | -2.2118 | Down | 9.02E-07  | 2.08E-06  |
| Unigene118817 | Potri.008G172500.1 | 0.749   | 3.4698   | -2.2118 | Down | 9.02E-07  | 2.08E-06  |
| Unigene75654  | Potri.008G045300.1 | 21.8421 | 101.1871 | -2.2118 | Down | 1.34E-71  | 1.93E-70  |
| Unigene10534  | Potri.006G263700.1 | 1.5132  | 7.01     | -2.2118 | Down | 2.85E-12  | 9.16E-12  |
| Unigene51969  | Potri.006G184800.3 | 4.4804  | 20.7563  | -2.2118 | Down | 3.92E-23  | 1.93E-22  |

|               |                    |          |          |         |      |           |           |
|---------------|--------------------|----------|----------|---------|------|-----------|-----------|
| Unigene56398  | Potri.005G049100.4 | 2.1623   | 10.0172  | -2.2118 | Down | 2.85E-12  | 9.15E-12  |
| Unigene90811  | Potri.005G003500.1 | 1.8886   | 8.7492   | -2.2118 | Down | 2.85E-12  | 9.15E-12  |
| Unigene118766 | Potri.002G249700.1 | 0.7691   | 3.5628   | -2.2118 | Down | 9.02E-07  | 2.08E-06  |
| Unigene119516 | Potri.001G101800.1 | 1.1179   | 5.1787   | -2.2118 | Down | 1.03E-17  | 4.19E-17  |
| Unigene119406 | Potri.017G086300.1 | 0.9933   | 4.6018   | -2.2119 | Down | 2.85E-12  | 9.15E-12  |
| Unigene3726   | Potri.016G095900.5 | 2.3682   | 10.9712  | -2.2119 | Down | 2.85E-12  | 9.15E-12  |
| Unigene98971  | Potri.013G107700.2 | 0.8056   | 3.7321   | -2.2119 | Down | 9.02E-07  | 2.08E-06  |
| Unigene30194  | Potri.011G052600.1 | 1.0177   | 4.7148   | -2.2119 | Down | 2.85E-12  | 9.15E-12  |
| Unigene3316   | Potri.010G074700.2 | 3.027    | 14.0232  | -2.2119 | Down | 4.30E-50  | 4.21E-49  |
| Unigene40202  | Potri.008G099700.3 | 0.7159   | 3.3166   | -2.2119 | Down | 9.02E-07  | 2.08E-06  |
| Unigene52924  | Potri.006G007800.1 | 0.8535   | 3.9542   | -2.2119 | Down | 9.02E-07  | 2.08E-06  |
| Unigene101272 | Potri.001G399800.2 | 0.8966   | 4.1538   | -2.2119 | Down | 9.02E-07  | 2.08E-06  |
| Unigene113711 | Potri.001G078400.1 | 2.8914   | 13.3951  | -2.2119 | Down | 2.85E-12  | 9.16E-12  |
| Unigene68701  | Potri.008G036400.2 | 0.6578   | 3.0476   | -2.212  | Down | 9.02E-07  | 2.08E-06  |
| Unigene27573  | Potri.002G154700.1 | 14.3318  | 66.4145  | -2.2123 | Down | 1.30E-85  | 2.30E-84  |
| Unigene49726  | Potri.018G024000.2 | 11.519   | 53.3833  | -2.2124 | Down | 1.70E-69  | 2.37E-68  |
| Unigene18070  | Potri.014G045100.1 | 5.0136   | 23.2357  | -2.2124 | Down | 4.03E-64  | 5.15E-63  |
| Unigene15172  | Potri.010G052800.1 | 1.923    | 8.9127   | -2.2125 | Down | 3.52E-30  | 2.14E-29  |
| Unigene29350  | Potri.009G012400.3 | 2.2463   | 10.4121  | -2.2126 | Down | 5.51E-48  | 5.16E-47  |
| Unigene32815  | Potri.006G224600.2 | 10.4923  | 48.6322  | -2.2126 | Down | 2.33E-197 | 1.19E-195 |
| Unigene91928  | Potri.006G167200.1 | 7.1923   | 33.3375  | -2.2126 | Down | 5.51E-48  | 5.16E-47  |
| Unigene45653  | Potri.019G097000.2 | 3.6911   | 17.1101  | -2.2127 | Down | 1.33E-42  | 1.11E-41  |
| Unigene476    | Potri.012G043000.3 | 4.2315   | 19.6142  | -2.2127 | Down | 6.61E-176 | 2.91E-174 |
| Unigene53395  | Potri.016G113600.4 | 2.5275   | 11.7172  | -2.2128 | Down | 2.30E-19  | 9.99E-19  |
| Unigene47490  | Potri.009G060600.2 | 8.7396   | 40.5215  | -2.213  | Down | 5.13E-62  | 6.32E-61  |
| Unigene53217  | Potri.009G034900.5 | 8.2235   | 38.1285  | -2.213  | Down | 8.02E-32  | 5.13E-31  |
| Unigene22524  | Potri.015G106000.3 | 8.3561   | 38.75    | -2.2133 | Down | 7.46E-39  | 5.69E-38  |
| Unigene109146 | Potri.011G114800.1 | 4.0466   | 18.7657  | -2.2133 | Down | 6.23E-14  | 2.17E-13  |
| Unigene82294  | Potri.006G218900.1 | 112.1856 | 520.2439 | -2.2133 | Down | 0         | 0         |
| Unigene52361  | Potri.006G062300.7 | 6.2876   | 29.163   | -2.2136 | Down | 1.83E-33  | 1.22E-32  |
| Unigene14792  | Potri.001G375500.2 | 6.2166   | 28.8366  | -2.2137 | Down | 5.16E-21  | 2.38E-20  |
| Unigene11319  | Potri.004G159300.4 | 10.3481  | 48.0059  | -2.2138 | Down | 6.24E-74  | 9.31E-73  |
| Unigene103449 | Potri.010G057600.1 | 1.5346   | 7.1193   | -2.2139 | Down | 4.57E-28  | 2.62E-27  |
| Unigene7620   | Potri.001G460500.1 | 2.3359   | 10.8378  | -2.214  | Down | 4.20E-35  | 2.91E-34  |
| Unigene11610  | Potri.006G166500.1 | 6.2902   | 29.1878  | -2.2142 | Down | 3.50E-63  | 4.40E-62  |
| Unigene17403  | Potri.009G131700.1 | 4.2349   | 19.6539  | -2.2144 | Down | 1.04E-29  | 6.27E-29  |
| Unigene16093  | Potri.006G220900.5 | 15.0188  | 69.7018  | -2.2144 | Down | 8.64E-51  | 8.57E-50  |
| Unigene90202  | Potri.003G053200.3 | 1.2931   | 6.001    | -2.2144 | Down | 1.87E-08  | 4.87E-08  |
| Unigene15206  | Potri.001G087300.1 | 7.9491   | 36.8913  | -2.2144 | Down | 9.61E-37  | 6.98E-36  |

|               |                    |         |          |         |      |           |           |
|---------------|--------------------|---------|----------|---------|------|-----------|-----------|
| Unigene16746  | Potri.001G298200.1 | 28.8889 | 134.082  | -2.2145 | Down | 1.76E-129 | 5.18E-128 |
| Unigene73217  | Potri.009G043600.1 | 14.387  | 66.784   | -2.2147 | Down | 2.08E-45  | 1.84E-44  |
| Unigene22595  | Potri.001G160300.1 | 4.6987  | 21.8113  | -2.2147 | Down | 4.15E-89  | 7.69E-88  |
| Unigene2093   | Potri.005G227700.1 | 3.639   | 16.8928  | -2.2148 | Down | 2.20E-38  | 1.66E-37  |
| Unigene7229   | Potri.006G191400.2 | 5.1702  | 24.005   | -2.215  | Down | 2.63E-24  | 1.35E-23  |
| Unigene21848  | Potri.001G190000.2 | 7.2     | 33.4281  | -2.215  | Down | 2.59E-294 | 2.23E-292 |
| Unigene33054  | Potri.014G193900.1 | 3.3565  | 15.5851  | -2.2151 | Down | 5.06E-40  | 3.97E-39  |
| Unigene26721  | Potri.001G407000.1 | 3.4709  | 16.1162  | -2.2151 | Down | 5.06E-40  | 3.97E-39  |
| Unigene28608  | Potri.014G164300.4 | 13.9152 | 64.6322  | -2.2156 | Down | 8.25E-132 | 2.50E-130 |
| Unigene43263  | Potri.004G157000.2 | 7.0605  | 32.7958  | -2.2157 | Down | 1.41E-190 | 6.92E-189 |
| Unigene89091  | Potri.007G128300.3 | 8.2531  | 38.3376  | -2.2158 | Down | 2.67E-43  | 2.26E-42  |
| Unigene14487  | Potri.015G061400.1 | 0.7791  | 3.6198   | -2.216  | Down | 3.96E-10  | 1.14E-09  |
| Unigene104564 | Potri.010G211100.3 | 2.0094  | 9.336    | -2.216  | Down | 3.96E-10  | 1.14E-09  |
| Unigene52346  | Potri.004G052500.2 | 1.0676  | 4.9602   | -2.216  | Down | 3.96E-10  | 1.14E-09  |
| Unigene113622 | Potri.001G133800.2 | 2.3222  | 10.789   | -2.216  | Down | 3.96E-10  | 1.14E-09  |
| Unigene105253 | Potri.014G100400.2 | 1.3594  | 6.3161   | -2.2161 | Down | 3.96E-10  | 1.14E-09  |
| Unigene25111  | Potri.003G157900.1 | 2.4918  | 11.5774  | -2.2161 | Down | 6.84E-19  | 2.92E-18  |
| Unigene466    | Potri.005G218900.2 | 7.8724  | 36.5813  | -2.2162 | Down | 9.35E-171 | 3.97E-169 |
| Unigene32996  | Potri.001G101800.1 | 2.0876  | 9.7008   | -2.2163 | Down | 1.42E-46  | 1.29E-45  |
| Unigene88486  | Potri.002G190200.4 | 9.6041  | 44.6369  | -2.2165 | Down | 3.26E-48  | 3.07E-47  |
| Unigene37664  | Potri.011G147400.2 | 7.3935  | 34.3677  | -2.2167 | Down | 7.52E-50  | 7.32E-49  |
| Unigene458    | Potri.003G207100.1 | 4.9702  | 23.1036  | -2.2167 | Down | 3.50E-175 | 1.53E-173 |
| Unigene40538  | Potri.008G089800.1 | 4.8735  | 22.6559  | -2.2169 | Down | 2.03E-70  | 2.87E-69  |
| Unigene69595  | Potri.004G106300.1 | 6.9073  | 32.1121  | -2.2169 | Down | 5.71E-91  | 1.08E-89  |
| Unigene70007  | Potri.017G008300.1 | 2.9903  | 13.9037  | -2.2171 | Down | 3.46E-22  | 1.65E-21  |
| Unigene49755  | Potri.016G038100.7 | 8.4368  | 39.2284  | -2.2171 | Down | 4.00E-53  | 4.17E-52  |
| Unigene20577  | Potri.014G043000.1 | 1.6481  | 7.6632   | -2.2171 | Down | 8.55E-12  | 2.68E-11  |
| Unigene21287  | Potri.005G195500.1 | 10.7377 | 49.9271  | -2.2171 | Down | 2.23E-217 | 1.28E-215 |
| Unigene10064  | Potri.005G145400.1 | 2.2286  | 10.3622  | -2.2171 | Down | 8.55E-12  | 2.68E-11  |
| Unigene1486   | Potri.002G021400.1 | 5.0046  | 23.2724  | -2.2173 | Down | 4.80E-65  | 6.24E-64  |
| Unigene50120  | Potri.001G368700.1 | 3.3673  | 15.6586  | -2.2173 | Down | 4.80E-65  | 6.24E-64  |
| Unigene75276  | Potri.008G079200.1 | 43.9117 | 204.2139 | -2.2174 | Down | 7.84E-142 | 2.61E-140 |
| Unigene83804  | Potri.018G065200.1 | 96.5963 | 449.25   | -2.2175 | Down | 0         | 0         |
| Unigene43429  | Potri.017G155300.6 | 5.2184  | 24.2772  | -2.2179 | Down | 2.22E-49  | 2.14E-48  |
| Unigene44463  | Potri.016G037600.1 | 2.6471  | 12.3148  | -2.2179 | Down | 1.77E-25  | 9.38E-25  |
| Unigene27822  | Potri.012G142200.1 | 1.9354  | 9.0038   | -2.2179 | Down | 1.87E-13  | 6.35E-13  |
| Unigene999    | Potri.009G110400.1 | 4.7894  | 22.2817  | -2.2179 | Down | 1.92E-37  | 1.42E-36  |
| Unigene4961   | Potri.004G201400.2 | 11.3971 | 53.0221  | -2.2179 | Down | 2.22E-49  | 2.14E-48  |
| Unigene8711   | Potri.001G164800.4 | 89.1198 | 414.6787 | -2.2182 | Down | 0         | 0         |

|               |                    |         |          |         |      |           |           |
|---------------|--------------------|---------|----------|---------|------|-----------|-----------|
| Unigene42222  | Potri.013G150200.1 | 5.0231  | 23.3742  | -2.2183 | Down | 4.01E-27  | 2.24E-26  |
| Unigene328    | Potri.005G097400.1 | 9.1187  | 42.4322  | -2.2183 | Down | 3.00E-205 | 1.61E-203 |
| Unigene14235  | Potri.006G066800.1 | 13.2294 | 61.5645  | -2.2184 | Down | 1.01E-40  | 8.08E-40  |
| Unigene24458  | Potri.017G149700.1 | 3.5796  | 16.6603  | -2.2185 | Down | 9.13E-29  | 5.35E-28  |
| Unigene77248  | Potri.012G088500.2 | 17.1902 | 80.021   | -2.2188 | Down | 3.36E-59  | 3.95E-58  |
| Unigene58388  | Potri.006G257100.2 | 6.3603  | 29.6163  | -2.2192 | Down | 1.08E-33  | 7.27E-33  |
| Unigene38834  | Potri.004G039500.1 | 11.877  | 55.3075  | -2.2193 | Down | 2.23E-67  | 3.01E-66  |
| Unigene53958  | Potri.006G281000.2 | 2.389   | 11.1257  | -2.2194 | Down | 2.04E-18  | 8.55E-18  |
| Unigene35930  | Potri.015G063600.3 | 14.4422 | 67.2612  | -2.2195 | Down | 1.20E-70  | 1.70E-69  |
| Unigene548    | Potri.018G024800.2 | 6.7868  | 31.6148  | -2.2198 | Down | 4.00E-134 | 1.24E-132 |
| Unigene45560  | Potri.015G125400.1 | 3.096   | 14.4222  | -2.2198 | Down | 9.92E-59  | 1.15E-57  |
| Unigene20030  | Potri.002G055600.1 | 9.4788  | 44.1639  | -2.2201 | Down | 1.58E-43  | 1.34E-42  |
| Unigene38721  | Potri.010G146800.2 | 8.1174  | 37.8239  | -2.2202 | Down | 2.50E-110 | 6.06E-109 |
| Unigene45036  | Potri.006G107500.1 | 2.7276  | 12.7094  | -2.2202 | Down | 2.32E-23  | 1.15E-22  |
| Unigene38539  | Potri.001G089100.1 | 4.1444  | 19.3112  | -2.2202 | Down | 2.32E-23  | 1.15E-22  |
| Unigene1236   | Potri.003G220800.1 | 2.617   | 12.1948  | -2.2203 | Down | 8.38E-47  | 7.65E-46  |
| Unigene44646  | Potri.002G171700.1 | 19.5708 | 91.2022  | -2.2204 | Down | 3.47E-140 | 1.14E-138 |
| Unigene42963  | Potri.014G086500.1 | 12.1672 | 56.7052  | -2.2205 | Down | 1.57E-266 | 1.18E-264 |
| Unigene35083  | Potri.011G078800.1 | 17.375  | 80.9808  | -2.2206 | Down | 1.08E-101 | 2.36E-100 |
| Unigene62276  | Potri.019G119500.1 | 5.9327  | 27.655   | -2.2208 | Down | 1.26E-56  | 1.41E-55  |
| Unigene39323  | Potri.001G109200.3 | 4.0948  | 19.088   | -2.2208 | Down | 1.26E-56  | 1.41E-55  |
| Unigene46306  | Potri.007G090400.1 | 9.6579  | 45.029   | -2.2211 | Down | 3.21E-33  | 2.13E-32  |
| Unigene1708   | Potri.005G177200.1 | 3.4123  | 15.9093  | -2.2211 | Down | 3.21E-33  | 2.13E-32  |
| Unigene105552 | Potri.011G003000.1 | 1.8832  | 8.782    | -2.2214 | Down | 3.85E-38  | 2.89E-37  |
| Unigene35050  | Potri.006G017500.1 | 26.4392 | 123.2992 | -2.2214 | Down | 0         | 0         |
| Unigene33943  | Potri.013G026600.1 | 4.2121  | 19.6448  | -2.2215 | Down | 4.67E-43  | 3.93E-42  |
| Unigene87445  | Potri.012G126000.2 | 18.1776 | 84.8213  | -2.2223 | Down | 1.38E-85  | 2.45E-84  |
| Unigene28949  | Potri.002G238000.1 | 6.6573  | 31.069   | -2.2225 | Down | 2.98E-118 | 7.87E-117 |
| Unigene116028 | Potri.014G189100.1 | 0.7338  | 3.4256   | -2.2229 | Down | 1.42E-04  | 2.69E-04  |
| Unigene113845 | Potri.011G136500.1 | 0.8608  | 4.0185   | -2.2229 | Down | 1.42E-04  | 2.69E-04  |
| Unigene46330  | Potri.008G207700.3 | 0.8435  | 3.9377   | -2.2229 | Down | 2.77E-06  | 6.15E-06  |
| Unigene17282  | Potri.007G126000.1 | 1.7394  | 8.1203   | -2.2229 | Down | 3.05E-21  | 1.41E-20  |
| Unigene113323 | Potri.007G123200.1 | 0.8846  | 4.1297   | -2.2229 | Down | 1.42E-04  | 2.69E-04  |
| Unigene64594  | Potri.006G151100.2 | 0.6506  | 3.0373   | -2.2229 | Down | 1.42E-04  | 2.69E-04  |
| Unigene102797 | Potri.005G235400.1 | 0.8168  | 3.8132   | -2.2229 | Down | 1.42E-04  | 2.69E-04  |
| Unigene112698 | Potri.005G210700.2 | 0.9135  | 4.2646   | -2.2229 | Down | 1.42E-04  | 2.69E-04  |
| Unigene30400  | Potri.T064100.1    | 0.805   | 3.7583   | -2.223  | Down | 1.42E-04  | 2.69E-04  |
| Unigene111688 | Potri.T025300.1    | 0.9523  | 4.446    | -2.223  | Down | 1.42E-04  | 2.69E-04  |
| Unigene64713  | Potri.T002600.1    | 1.0409  | 4.8596   | -2.223  | Down | 1.42E-04  | 2.69E-04  |



|               |                    |        |         |        |      |          |          |
|---------------|--------------------|--------|---------|--------|------|----------|----------|
| Unigene74196  | Potri.018G152600.2 | 2.6023 | 12.149  | -2.223 | Down | 1.20E-09 | 3.34E-09 |
| Unigene115881 | Potri.018G149900.2 | 0.7435 | 3.4711  | -2.223 | Down | 1.42E-04 | 2.69E-04 |
| Unigene14788  | Potri.016G116300.2 | 8.0852 | 37.7462 | -2.223 | Down | 1.38E-42 | 1.15E-41 |
| Unigene57602  | Potri.016G113600.7 | 1.0657 | 4.9753  | -2.223 | Down | 5.67E-08 | 1.43E-07 |
| Unigene96721  | Potri.016G043100.1 | 1.902  | 8.8795  | -2.223 | Down | 2.57E-11 | 7.88E-11 |
| Unigene114134 | Potri.015G121700.1 | 0.8445 | 3.9427  | -2.223 | Down | 1.42E-04 | 2.69E-04 |
| Unigene9843   | Potri.015G095000.2 | 7.2193 | 33.7037 | -2.223 | Down | 3.17E-44 | 2.73E-43 |
| Unigene94676  | Potri.014G180800.1 | 1.2319 | 5.7513  | -2.223 | Down | 2.57E-11 | 7.88E-11 |
| Unigene107388 | Potri.014G142700.1 | 1.6785 | 7.8361  | -2.223 | Down | 2.77E-06 | 6.15E-06 |
| Unigene1846   | Potri.014G117800.2 | 2.5521 | 11.9146 | -2.223 | Down | 6.88E-23 | 3.36E-22 |
| Unigene97602  | Potri.012G137500.2 | 0.9646 | 4.5035  | -2.223 | Down | 2.77E-06 | 6.15E-06 |
| Unigene46678  | Potri.012G040700.1 | 1.6062 | 7.4987  | -2.223 | Down | 2.77E-06 | 6.15E-06 |
| Unigene15557  | Potri.010G250800.2 | 1.3702 | 6.3968  | -2.223 | Down | 2.77E-06 | 6.15E-06 |
| Unigene95023  | Potri.010G235700.1 | 0.9895 | 4.6197  | -2.223 | Down | 3.05E-21 | 1.41E-20 |
| Unigene33672  | Potri.010G118300.1 | 2.8529 | 13.3192 | -2.223 | Down | 4.16E-31 | 2.60E-30 |
| Unigene111409 | Potri.009G022600.1 | 0.9646 | 4.5035  | -2.223 | Down | 1.42E-04 | 2.69E-04 |
| Unigene51442  | Potri.007G128000.1 | 2.821  | 13.1699 | -2.223 | Down | 2.72E-16 | 1.05E-15 |
| Unigene48683  | Potri.007G093200.6 | 2.8257 | 13.1921 | -2.223 | Down | 6.06E-18 | 2.50E-17 |
| Unigene105631 | Potri.007G075500.1 | 0.9187 | 4.2891  | -2.223 | Down | 1.20E-09 | 3.34E-09 |
| Unigene41636  | Potri.007G034900.1 | 0.8248 | 3.8507  | -2.223 | Down | 2.77E-06 | 6.15E-06 |
| Unigene4450   | Potri.006G200800.1 | 1.2163 | 5.6783  | -2.223 | Down | 2.57E-11 | 7.88E-11 |
| Unigene37152  | Potri.006G134200.2 | 1.5816 | 7.3839  | -2.223 | Down | 1.23E-14 | 4.41E-14 |
| Unigene47614  | Potri.006G132300.1 | 1.5399 | 7.1891  | -2.223 | Down | 2.77E-06 | 6.15E-06 |
| Unigene39007  | Potri.005G083300.1 | 3.0553 | 14.2637 | -2.223 | Down | 1.23E-14 | 4.41E-14 |
| Unigene36736  | Potri.005G077500.2 | 1.0081 | 4.7064  | -2.223 | Down | 2.77E-06 | 6.15E-06 |
| Unigene115047 | Potri.005G072100.1 | 2.3893 | 11.1546 | -2.223 | Down | 2.57E-11 | 7.88E-11 |
| Unigene40529  | Potri.005G042400.1 | 0.8558 | 3.9955  | -2.223 | Down | 5.67E-08 | 1.43E-07 |
| Unigene16897  | Potri.004G040900.5 | 1.119  | 5.2241  | -2.223 | Down | 1.42E-04 | 2.69E-04 |
| Unigene106092 | Potri.003G081400.9 | 1.1349 | 5.2983  | -2.223 | Down | 1.20E-09 | 3.34E-09 |
| Unigene50906  | Potri.003G066200.1 | 7.2038 | 33.6314 | -2.223 | Down | 3.52E-26 | 1.91E-25 |
| Unigene19350  | Potri.003G023300.1 | 5.4979 | 25.6674 | -2.223 | Down | 1.82E-29 | 1.09E-28 |
| Unigene43986  | Potri.002G169700.1 | 5.3697 | 25.0691 | -2.223 | Down | 2.06E-52 | 2.12E-51 |
| Unigene116602 | Potri.002G014100.1 | 1.0329 | 4.8222  | -2.223 | Down | 2.77E-06 | 6.15E-06 |
| Unigene104597 | Potri.002G013100.2 | 1.2573 | 5.8697  | -2.223 | Down | 5.59E-13 | 1.86E-12 |
| Unigene12367  | Potri.001G345300.1 | 2.422  | 11.3075 | -2.223 | Down | 6.06E-18 | 2.50E-17 |
| Unigene19551  | Potri.001G315800.1 | 7.0303 | 32.8214 | -2.223 | Down | 6.00E-41 | 4.81E-40 |
| Unigene24897  | Potri.001G200400.1 | 4.8979 | 22.8663 | -2.223 | Down | 6.88E-23 | 3.36E-22 |
| Unigene51105  | Potri.001G127600.1 | 1.0458 | 4.8823  | -2.223 | Down | 1.42E-04 | 2.69E-04 |
| Unigene30441  | Potri.001G072500.1 | 1.2573 | 5.8697  | -2.223 | Down | 2.77E-06 | 6.15E-06 |

|               |                    |         |          |         |      |           |           |
|---------------|--------------------|---------|----------|---------|------|-----------|-----------|
| Unigene36953  | Potri.007G050300.1 | 0.7052  | 3.2925   | -2.2231 | Down | 2.77E-06  | 6.15E-06  |
| Unigene12113  | Potri.007G100200.1 | 11.6749 | 54.5205  | -2.2234 | Down | 5.76E-150 | 2.06E-148 |
| Unigene13321  | Potri.015G147200.1 | 13.8922 | 64.8909  | -2.2237 | Down | 2.22E-81  | 3.71E-80  |
| Unigene30372  | Potri.015G136900.2 | 20.4402 | 95.48    | -2.2238 | Down | 1.78E-76  | 2.77E-75  |
| Unigene6712   | Potri.010G184300.1 | 11.297  | 52.7759  | -2.2239 | Down | 4.96E-65  | 6.44E-64  |
| Unigene22486  | Potri.014G115000.1 | 5.5586  | 25.9693  | -2.224  | Down | 4.00E-60  | 4.77E-59  |
| Unigene3352   | Potri.013G073800.2 | 12.5505 | 58.635   | -2.224  | Down | 4.00E-60  | 4.77E-59  |
| Unigene1490   | Potri.006G224900.2 | 5.3493  | 24.9913  | -2.224  | Down | 9.25E-62  | 1.13E-60  |
| Unigene73733  | Potri.016G121100.1 | 36.068  | 168.5125 | -2.2241 | Down | 1.40E-113 | 3.51E-112 |
| Unigene30589  | Potri.015G109300.3 | 11.8615 | 55.4279  | -2.2243 | Down | 4.96E-47  | 4.55E-46  |
| Unigene36093  | Potri.010G080600.1 | 7.4974  | 35.0358  | -2.2244 | Down | 2.15E-45  | 1.91E-44  |
| Unigene106822 | Potri.004G214100.2 | 1.5717  | 7.3454   | -2.2245 | Down | 1.77E-40  | 1.40E-39  |
| Unigene47638  | Potri.001G075600.1 | 24.222  | 113.2047 | -2.2245 | Down | 5.18E-118 | 1.37E-116 |
| Unigene6560   | Potri.013G126900.2 | 5.8281  | 27.2409  | -2.2247 | Down | 3.36E-37  | 2.47E-36  |
| Unigene15969  | Potri.001G358300.1 | 21.532  | 100.6457 | -2.2247 | Down | 4.20E-71  | 6.00E-70  |
| Unigene4907   | Potri.005G010200.1 | 7.1219  | 33.2926  | -2.2249 | Down | 6.41E-34  | 4.33E-33  |
| Unigene103465 | Potri.010G132600.1 | 4.1078  | 19.2048  | -2.225  | Down | 3.02E-90  | 5.68E-89  |
| Unigene32660  | Potri.005G211100.1 | 2.4882  | 11.6326  | -2.225  | Down | 2.73E-61  | 3.31E-60  |
| Unigene62295  | Potri.001G166800.3 | 4.0845  | 19.0963  | -2.2251 | Down | 1.23E-30  | 7.60E-30  |
| Unigene23324  | Potri.010G012800.3 | 5.4057  | 25.2759  | -2.2252 | Down | 5.40E-29  | 3.19E-28  |
| Unigene105599 | Potri.004G057600.1 | 3.0276  | 14.1562  | -2.2252 | Down | 5.40E-29  | 3.19E-28  |
| Unigene26819  | Potri.003G163200.1 | 7.2441  | 33.8751  | -2.2253 | Down | 2.37E-27  | 1.33E-26  |
| Unigene35699  | Potri.002G163000.1 | 20.3242 | 95.0511  | -2.2255 | Down | 6.04E-98  | 1.26E-96  |
| Unigene18004  | Potri.003G166900.1 | 4.9002  | 22.9186  | -2.2256 | Down | 3.37E-48  | 3.17E-47  |
| Unigene12692  | Potri.010G129400.1 | 2.6008  | 12.1649  | -2.2257 | Down | 5.34E-69  | 7.39E-68  |
| Unigene116310 | Potri.006G150900.1 | 4.8549  | 22.7078  | -2.2257 | Down | 4.61E-24  | 2.34E-23  |
| Unigene8276   | Potri.015G094800.2 | 6.3786  | 29.8444  | -2.2261 | Down | 3.47E-59  | 4.07E-58  |
| Unigene11001  | Potri.010G185200.1 | 5.6621  | 26.4933  | -2.2262 | Down | 1.38E-151 | 5.03E-150 |
| Unigene22436  | Potri.002G113400.1 | 19.1196 | 89.4814  | -2.2265 | Down | 1.26E-257 | 9.04E-256 |
| Unigene37560  | Potri.019G053200.4 | 13.4975 | 63.1705  | -2.2266 | Down | 1.22E-52  | 1.26E-51  |
| Unigene16754  | Potri.006G170700.1 | 14.3245 | 67.0422  | -2.2266 | Down | 4.85E-86  | 8.65E-85  |
| Unigene74845  | Potri.010G036900.1 | 25.955  | 121.4815 | -2.2267 | Down | 2.09E-84  | 3.64E-83  |
| Unigene28167  | Potri.010G002200.2 | 2.5451  | 11.9137  | -2.2268 | Down | 1.81E-17  | 7.30E-17  |
| Unigene63115  | Potri.005G065100.1 | 3.642   | 17.0483  | -2.2268 | Down | 1.81E-17  | 7.30E-17  |
| Unigene103419 | Potri.003G126500.1 | 1.1544  | 5.4038   | -2.2268 | Down | 1.81E-17  | 7.30E-17  |
| Unigene28997  | Potri.017G094800.1 | 3.3085  | 15.4885  | -2.2269 | Down | 9.94E-48  | 9.27E-47  |
| Unigene15918  | Potri.010G036900.1 | 25.0466 | 117.2554 | -2.227  | Down | 7.19E-78  | 1.14E-76  |
| Unigene354    | Potri.002G229100.1 | 9.0153  | 42.2131  | -2.2272 | Down | 1.93E-101 | 4.21E-100 |
| Unigene2879   | Potri.T113400.1    | 12.0487 | 56.4342  | -2.2277 | Down | 3.05E-156 | 1.15E-154 |

|               |                     |         |          |         |      |           |           |
|---------------|---------------------|---------|----------|---------|------|-----------|-----------|
| Unigene3284   | Potri.016G016100.1  | 3.7876  | 17.7418  | -2.2278 | Down | 7.03E-27  | 3.89E-26  |
| Unigene48673  | Potri.006G150900.1  | 7.09    | 33.2109  | -2.2278 | Down | 7.03E-27  | 3.89E-26  |
| Unigene36094  | Potri.003G047200.1  | 1.8099  | 8.4779   | -2.2278 | Down | 3.68E-14  | 1.29E-13  |
| Unigene32483  | Potri.001G055900.4  | 1.3008  | 6.0933   | -2.2278 | Down | 7.03E-27  | 3.89E-26  |
| Unigene41472  | Potri.006G111300.1  | 13.7873 | 64.5881  | -2.2279 | Down | 3.73E-63  | 4.69E-62  |
| Unigene39641  | Potri.012G000900.1  | 2.08    | 9.7442   | -2.228  | Down | 1.56E-50  | 1.54E-49  |
| Unigene23460  | Potri.015G050300.1  | 10.6023 | 49.681   | -2.2283 | Down | 8.36E-93  | 1.63E-91  |
| Unigene84748  | Potri.015G052200.1  | 70.6169 | 330.9202 | -2.2284 | Down | 2.93E-293 | 2.52E-291 |
| Unigene115869 | Potri.018G122900.1  | 4.9568  | 23.23    | -2.2285 | Down | 1.37E-23  | 6.84E-23  |
| Unigene45974  | Potri.013G119700.3  | 4.6479  | 21.7826  | -2.2285 | Down | 1.37E-23  | 6.84E-23  |
| Unigene12224  | Potri.010G220800.1  | 1.4905  | 6.9852   | -2.2285 | Down | 1.37E-23  | 6.84E-23  |
| Unigene41685  | Potri.010G157400.2  | 18.329  | 85.8996  | -2.2285 | Down | 1.82E-111 | 4.46E-110 |
| Unigene96950  | Potri.010G092300.2  | 2.5724  | 12.0556  | -2.2285 | Down | 1.68E-12  | 5.46E-12  |
| Unigene49822  | Potri.009G075300.2  | 6.8565  | 32.1334  | -2.2285 | Down | 1.30E-56  | 1.46E-55  |
| Unigene31656  | Potri.006G058900.1  | 1.9376  | 9.0808   | -2.2285 | Down | 1.68E-12  | 5.46E-12  |
| Unigene76166  | Potri.001G177000.4  | 3.3303  | 15.6076  | -2.2285 | Down | 1.68E-12  | 5.46E-12  |
| Unigene116970 | Potri.001G166500.1  | 2.2006  | 10.313   | -2.2285 | Down | 1.68E-12  | 5.46E-12  |
| Unigene50076  | Potri.005G074200.2  | 3.8327  | 17.9641  | -2.2287 | Down | 5.65E-55  | 6.09E-54  |
| Unigene65277  | Potri.004G162400.10 | 21.3455 | 100.0481 | -2.2287 | Down | 3.35E-108 | 7.90E-107 |
| Unigene31198  | Potri.014G140100.1  | 3.1052  | 14.5575  | -2.229  | Down | 2.46E-92  | 4.75E-91  |
| Unigene2182   | Potri.001G097500.2  | 7.6248  | 35.7449  | -2.229  | Down | 5.32E-83  | 9.07E-82  |
| Unigene50122  | Potri.001G209400.2  | 8.1991  | 38.446   | -2.2293 | Down | 9.85E-108 | 2.31E-106 |
| Unigene43513  | Potri.017G080000.1  | 5.9936  | 28.1066  | -2.2294 | Down | 9.29E-125 | 2.62E-123 |
| Unigene64702  | Potri.014G110500.1  | 2.4964  | 11.7075  | -2.2295 | Down | 2.69E-20  | 1.21E-19  |
| Unigene42008  | Potri.014G075000.5  | 1.3549  | 6.3541   | -2.2295 | Down | 7.73E-11  | 2.31E-10  |
| Unigene118218 | Potri.011G084000.2  | 4.5618  | 21.3936  | -2.2295 | Down | 1.08E-29  | 6.48E-29  |
| Unigene10807  | Potri.004G106600.1  | 1.7772  | 8.3344   | -2.2295 | Down | 1.99E-48  | 1.89E-47  |
| Unigene34196  | Potri.019G122900.1  | 3.2307  | 15.153   | -2.2297 | Down | 3.84E-56  | 4.25E-55  |
| Unigene18110  | Potri.005G209800.4  | 5.6338  | 26.4239  | -2.2297 | Down | 1.73E-65  | 2.27E-64  |
| Unigene9745   | Potri.018G029200.1  | 4.0858  | 19.1696  | -2.2301 | Down | 1.20E-18  | 5.08E-18  |
| Unigene32070  | Potri.010G168500.4  | 1.8152  | 8.5165   | -2.2301 | Down | 1.20E-18  | 5.08E-18  |
| Unigene22054  | Potri.007G036100.2  | 3.5654  | 16.7315  | -2.2304 | Down | 6.05E-59  | 7.06E-58  |
| Unigene7261   | Potri.006G227300.1  | 6.5972  | 30.959   | -2.2304 | Down | 6.05E-59  | 7.06E-58  |
| Unigene21684  | Potri.010G146800.1  | 7.5243  | 35.3137  | -2.2306 | Down | 3.91E-233 | 2.44E-231 |
| Unigene42249  | Potri.019G025500.1  | 1.2523  | 5.8784   | -2.2308 | Down | 3.62E-09  | 9.83E-09  |
| Unigene30874  | Potri.010G229100.2  | 0.9853  | 4.6251   | -2.2308 | Down | 3.62E-09  | 9.83E-09  |
| Unigene74622  | Potri.016G025500.3  | 2.4064  | 11.2963  | -2.2309 | Down | 3.62E-09  | 9.83E-09  |
| Unigene29669  | Potri.015G033900.1  | 1.5269  | 7.1675   | -2.2309 | Down | 3.62E-09  | 9.83E-09  |
| Unigene99787  | Potri.006G216100.1  | 0.9652  | 4.531    | -2.2309 | Down | 3.62E-09  | 9.83E-09  |

|               |                    |         |          |         |      |           |           |
|---------------|--------------------|---------|----------|---------|------|-----------|-----------|
| Unigene5695   | Potri.002G172700.1 | 1.3706  | 6.4339   | -2.2309 | Down | 3.62E-09  | 9.83E-09  |
| Unigene50159  | Potri.018G057900.1 | 8.4261  | 39.5558  | -2.231  | Down | 5.75E-208 | 3.13E-206 |
| Unigene33249  | Potri.014G076500.1 | 0.8083  | 3.7946   | -2.231  | Down | 3.62E-09  | 9.83E-09  |
| Unigene32229  | Potri.017G042800.1 | 6.6786  | 31.3608  | -2.2313 | Down | 5.41E-235 | 3.41E-233 |
| Unigene36191  | Potri.001G228100.1 | 4.2535  | 19.9751  | -2.2315 | Down | 4.06E-23  | 2.00E-22  |
| Unigene51883  | Potri.002G004500.1 | 32.5239 | 152.757  | -2.2317 | Down | 3.80E-219 | 2.20E-217 |
| Unigene41841  | Potri.018G026700.1 | 3.5865  | 16.8469  | -2.2318 | Down | 2.42E-15  | 8.96E-15  |
| Unigene101435 | Potri.014G197000.1 | 1.2126  | 5.696    | -2.2318 | Down | 2.42E-15  | 8.96E-15  |
| Unigene22719  | Potri.002G245300.1 | 2.5807  | 12.1223  | -2.2318 | Down | 4.82E-43  | 4.05E-42  |
| Unigene9490   | Potri.015G071800.2 | 3.4032  | 15.9861  | -2.2319 | Down | 2.42E-15  | 8.96E-15  |
| Unigene12550  | Potri.010G030200.1 | 7.2506  | 34.0648  | -2.2321 | Down | 3.34E-55  | 3.62E-54  |
| Unigene94717  | Potri.001G226500.1 | 3.8039  | 17.8727  | -2.2322 | Down | 1.80E-21  | 8.41E-21  |
| Unigene42945  | Potri.001G184100.5 | 8.9082  | 41.857   | -2.2323 | Down | 3.41E-87  | 6.16E-86  |
| Unigene70924  | Potri.001G161700.2 | 61.0525 | 286.8944 | -2.2324 | Down | 5.04E-183 | 2.35E-181 |
| Unigene87947  | Potri.001G353100.1 | 31.6759 | 148.8707 | -2.2326 | Down | 6.87E-154 | 2.55E-152 |
| Unigene10726  | Potri.013G130400.1 | 5.7438  | 26.999   | -2.2328 | Down | 5.77E-225 | 3.45E-223 |
| Unigene51716  | Potri.008G138100.1 | 21.3799 | 100.5044 | -2.2329 | Down | 4.71E-155 | 1.76E-153 |
| Unigene114465 | Potri.T151000.1    | 1.5196  | 7.144    | -2.233  | Down | 1.73E-07  | 4.21E-07  |
| Unigene60674  | Potri.019G128900.1 | 1.9173  | 9.0135   | -2.233  | Down | 1.73E-07  | 4.21E-07  |
| Unigene115293 | Potri.016G056600.5 | 1.4346  | 6.7444   | -2.233  | Down | 1.73E-07  | 4.21E-07  |
| Unigene15945  | Potri.008G134600.1 | 1.6885  | 7.9378   | -2.233  | Down | 1.73E-07  | 4.21E-07  |
| Unigene16444  | Potri.006G199000.1 | 1.1493  | 5.4031   | -2.233  | Down | 1.73E-07  | 4.21E-07  |
| Unigene30521  | Potri.004G159000.1 | 1.1089  | 5.2132   | -2.233  | Down | 1.73E-07  | 4.21E-07  |
| Unigene92035  | Potri.001G391400.4 | 17.2852 | 81.2614  | -2.233  | Down | 4.74E-117 | 1.24E-115 |
| Unigene5438   | Potri.019G087000.2 | 1.121   | 5.2702   | -2.2331 | Down | 1.73E-07  | 4.21E-07  |
| Unigene94291  | Potri.011G153600.1 | 47.6873 | 224.2061 | -2.2331 | Down | 0         | 0         |
| Unigene98081  | Potri.011G107800.2 | 1.3321  | 6.2626   | -2.2331 | Down | 1.73E-07  | 4.21E-07  |
| Unigene65247  | Potri.004G141700.4 | 1.8565  | 8.728    | -2.2331 | Down | 1.73E-07  | 4.21E-07  |
| Unigene13547  | Potri.004G136700.1 | 1.4515  | 6.8239   | -2.2331 | Down | 8.01E-20  | 3.54E-19  |
| Unigene82217  | Potri.001G298200.1 | 35.865  | 168.6233 | -2.2332 | Down | 1.15E-139 | 3.74E-138 |
| Unigene38374  | Potri.010G066600.2 | 6.7946  | 31.9499  | -2.2334 | Down | 9.84E-55  | 1.06E-53  |
| Unigene78117  | Potri.001G399700.1 | 11.7454 | 55.2333  | -2.2334 | Down | 1.42E-42  | 1.18E-41  |
| Unigene47682  | Potri.014G140900.1 | 18.582  | 87.3846  | -2.2335 | Down | 2.18E-77  | 3.44E-76  |
| Unigene42381  | Potri.006G170700.1 | 8.0644  | 37.9254  | -2.2335 | Down | 0         | 0         |
| Unigene90843  | Potri.015G037000.1 | 35.3215 | 166.1191 | -2.2336 | Down | 1.19E-208 | 6.50E-207 |
| Unigene49309  | Potri.008G205100.1 | 6.4357  | 30.2694  | -2.2337 | Down | 4.26E-53  | 4.43E-52  |
| Unigene11279  | Potri.019G064100.1 | 4.8937  | 23.0181  | -2.2338 | Down | 5.11E-47  | 4.69E-46  |
| Unigene29047  | Potri.002G079100.1 | 3.9212  | 18.444   | -2.2338 | Down | 5.11E-47  | 4.69E-46  |
| Unigene22925  | Potri.017G070300.1 | 6.1161  | 28.77    | -2.2339 | Down | 6.18E-41  | 4.96E-40  |

|               |                    |         |          |         |      |           |           |
|---------------|--------------------|---------|----------|---------|------|-----------|-----------|
| Unigene3064   | Potri.009G011900.1 | 3.3309  | 15.669   | -2.2339 | Down | 1.55E-57  | 1.76E-56  |
| Unigene32816  | Potri.006G141400.1 | 21.6011 | 101.6131 | -2.2339 | Down | 1.22E-191 | 6.04E-190 |
| Unigene17713  | Potri.018G001900.1 | 7.912   | 37.2203  | -2.234  | Down | 1.09E-90  | 2.06E-89  |
| Unigene12430  | Potri.015G081500.1 | 1.2936  | 6.0859   | -2.2341 | Down | 3.58E-18  | 1.49E-17  |
| Unigene44300  | Potri.012G037100.2 | 15.7107 | 73.9224  | -2.2343 | Down | 3.88E-164 | 1.57E-162 |
| Unigene55589  | Potri.014G011700.1 | 6.8473  | 32.2258  | -2.2346 | Down | 1.20E-22  | 5.84E-22  |
| Unigene49712  | Potri.010G220700.1 | 1.5079  | 7.0965   | -2.2346 | Down | 5.03E-12  | 1.60E-11  |
| Unigene86083  | Potri.006G129100.2 | 2.3862  | 11.2302  | -2.2346 | Down | 5.03E-12  | 1.60E-11  |
| Unigene30301  | Potri.005G054100.1 | 1.6034  | 7.5461   | -2.2346 | Down | 5.03E-12  | 1.60E-11  |
| Unigene22478  | Potri.003G067000.1 | 7.8417  | 36.9059  | -2.2346 | Down | 8.68E-86  | 1.54E-84  |
| Unigene32347  | Potri.010G120800.1 | 4.2486  | 19.9998  | -2.2349 | Down | 1.66E-124 | 4.68E-123 |
| Unigene43662  | Potri.009G128900.1 | 9.8045  | 46.1556  | -2.235  | Down | 4.38E-78  | 6.98E-77  |
| Unigene18823  | Potri.006G217300.1 | 2.0138  | 9.4803   | -2.235  | Down | 4.15E-27  | 2.31E-26  |
| Unigene3809   | Potri.001G436400.1 | 4.9877  | 23.4803  | -2.235  | Down | 4.15E-27  | 2.31E-26  |
| Unigene14013  | Potri.008G062000.1 | 3.4865  | 16.4173  | -2.2354 | Down | 6.06E-66  | 8.00E-65  |
| Unigene2903   | Potri.001G421300.1 | 7.5593  | 35.597   | -2.2354 | Down | 1.31E-119 | 3.52E-118 |
| Unigene75900  | Potri.001G088600.1 | 11.7084 | 55.142   | -2.2356 | Down | 1.83E-40  | 1.45E-39  |
| Unigene38183  | Potri.005G114300.1 | 15.9051 | 74.9113  | -2.2357 | Down | 7.78E-127 | 2.24E-125 |
| Unigene54028  | Potri.014G072100.1 | 8.1622  | 38.4469  | -2.2358 | Down | 2.36E-49  | 2.27E-48  |
| Unigene20948  | Potri.014G150600.1 | 6.1562  | 29.001   | -2.236  | Down | 6.36E-30  | 3.85E-29  |
| Unigene38676  | Potri.018G026900.1 | 11.2108 | 52.8277  | -2.2364 | Down | 4.89E-61  | 5.92E-60  |
| Unigene25840  | Potri.006G237400.3 | 0.7593  | 3.5788   | -2.2367 | Down | 8.54E-06  | 1.81E-05  |
| Unigene107237 | Potri.T121800.3    | 1.1424  | 5.3847   | -2.2368 | Down | 8.07E-24  | 4.07E-23  |
| Unigene26749  | Potri.019G118000.1 | 1.2807  | 6.0364   | -2.2368 | Down | 8.54E-06  | 1.81E-05  |
| Unigene102440 | Potri.015G118900.1 | 0.8934  | 4.211    | -2.2368 | Down | 8.54E-06  | 1.81E-05  |
| Unigene113160 | Potri.015G004200.1 | 1.1888  | 5.6035   | -2.2368 | Down | 8.54E-06  | 1.81E-05  |
| Unigene96220  | Potri.014G189400.1 | 0.9413  | 4.4369   | -2.2368 | Down | 8.54E-06  | 1.81E-05  |
| Unigene38077  | Potri.013G007100.1 | 1.4009  | 6.6032   | -2.2368 | Down | 8.54E-06  | 1.81E-05  |
| Unigene54070  | Potri.011G103900.2 | 3.2434  | 15.2878  | -2.2368 | Down | 7.24E-15  | 2.62E-14  |
| Unigene7230   | Potri.010G220100.6 | 1.9827  | 9.3454   | -2.2368 | Down | 2.33E-10  | 6.78E-10  |
| Unigene14015  | Potri.010G022700.1 | 1.3203  | 6.2234   | -2.2368 | Down | 8.54E-06  | 1.81E-05  |
| Unigene40722  | Potri.009G052700.2 | 1.667   | 7.8574   | -2.2368 | Down | 2.33E-10  | 6.78E-10  |
| Unigene106689 | Potri.008G053500.1 | 0.7021  | 3.3094   | -2.2368 | Down | 8.54E-06  | 1.81E-05  |
| Unigene98391  | Potri.006G164000.1 | 0.7368  | 3.4728   | -2.2368 | Down | 8.54E-06  | 1.81E-05  |
| Unigene116890 | Potri.005G214400.8 | 1.7762  | 8.3719   | -2.2368 | Down | 2.33E-10  | 6.78E-10  |
| Unigene47333  | Potri.005G071600.1 | 0.9564  | 4.508    | -2.2368 | Down | 8.54E-06  | 1.81E-05  |
| Unigene113767 | Potri.005G036500.1 | 1.1521  | 5.4304   | -2.2368 | Down | 8.54E-06  | 1.81E-05  |
| Unigene52092  | Potri.003G177000.1 | 1.4075  | 6.6343   | -2.2368 | Down | 2.33E-10  | 6.78E-10  |
| Unigene9051   | Potri.002G043500.1 | 2.2778  | 10.7365  | -2.2368 | Down | 7.24E-15  | 2.62E-14  |

|               |                    |         |          |         |      |           |           |
|---------------|--------------------|---------|----------|---------|------|-----------|-----------|
| Unigene11664  | Potri.002G033800.1 | 6.2704  | 29.5553  | -2.2368 | Down | 3.79E-77  | 5.96E-76  |
| Unigene119100 | Potri.001G182600.1 | 1.0361  | 4.8836   | -2.2368 | Down | 2.33E-10  | 6.78E-10  |
| Unigene1069   | Potri.015G035600.1 | 4.8691  | 22.9595  | -2.2374 | Down | 5.32E-121 | 1.45E-119 |
| Unigene48321  | Potri.013G071900.1 | 3.438   | 16.2139  | -2.2376 | Down | 4.29E-31  | 2.68E-30  |
| Unigene20698  | Potri.004G102400.2 | 5.0175  | 23.6624  | -2.2376 | Down | 4.29E-31  | 2.68E-30  |
| Unigene80249  | Potri.001G148100.1 | 20.3864 | 96.1516  | -2.2377 | Down | 1.11E-76  | 1.74E-75  |
| Unigene45157  | Potri.013G060300.1 | 2.2342  | 10.538   | -2.2378 | Down | 3.02E-47  | 2.79E-46  |
| Unigene27597  | Potri.010G200200.1 | 3.2549  | 15.3538  | -2.2379 | Down | 3.57E-22  | 1.71E-21  |
| Unigene75622  | Potri.004G070500.5 | 9.7449  | 45.9777  | -2.2382 | Down | 6.61E-34  | 4.46E-33  |
| Unigene3497   | Potri.002G004100.2 | 7.3252  | 34.5611  | -2.2382 | Down | 4.73E-50  | 4.62E-49  |
| Unigene90389  | Potri.005G002800.2 | 25.258  | 119.1845 | -2.2384 | Down | 5.22E-145 | 1.79E-143 |
| Unigene42184  | Potri.001G300900.1 | 2.8176  | 13.2987  | -2.2387 | Down | 3.29E-13  | 1.11E-12  |
| Unigene80932  | Potri.008G121700.2 | 12.4827 | 58.917   | -2.2388 | Down | 2.05E-48  | 1.94E-47  |
| Unigene12476  | Potri.008G203100.1 | 17.7117 | 83.6046  | -2.2389 | Down | 6.92E-133 | 2.12E-131 |
| Unigene90164  | Potri.006G201000.1 | 3.3909  | 16.0096  | -2.2392 | Down | 1.59E-20  | 7.19E-20  |
| Unigene13888  | Potri.002G009300.3 | 1.6259  | 7.6764   | -2.2392 | Down | 1.59E-20  | 7.19E-20  |
| Unigene31862  | Potri.008G105200.1 | 2.5801  | 12.1825  | -2.2393 | Down | 8.90E-47  | 8.12E-46  |
| Unigene49527  | Potri.006G011300.1 | 5.1382  | 24.2615  | -2.2393 | Down | 8.90E-47  | 8.12E-46  |
| Unigene30307  | Potri.009G169300.3 | 26.8432 | 126.7768 | -2.2397 | Down | 1.93E-97  | 4.00E-96  |
| Unigene802    | Potri.003G223400.1 | 5.0055  | 23.6416  | -2.2397 | Down | 1.92E-272 | 1.49E-270 |
| Unigene90099  | Potri.001G125700.1 | 12.4998 | 59.0389  | -2.2398 | Down | 2.63E-71  | 3.77E-70  |
| Unigene32927  | Potri.010G059000.1 | 3.5687  | 16.8578  | -2.2399 | Down | 1.25E-59  | 1.47E-58  |
| Unigene36594  | Potri.007G128300.4 | 1.5455  | 7.3006   | -2.2399 | Down | 1.27E-30  | 7.83E-30  |
| Unigene116669 | Potri.002G113800.3 | 1.4829  | 7.0048   | -2.2399 | Down | 1.10E-08  | 2.89E-08  |
| Unigene9488   | Potri.010G110400.9 | 2.1744  | 10.2716  | -2.24   | Down | 1.10E-08  | 2.89E-08  |
| Unigene14997  | Potri.008G074800.1 | 2.4124  | 11.3958  | -2.24   | Down | 1.27E-30  | 7.83E-30  |
| Unigene17912  | Potri.006G152700.4 | 1.4014  | 6.6201   | -2.24   | Down | 1.10E-08  | 2.89E-08  |
| Unigene479    | Potri.001G331400.1 | 6.1242  | 28.9298  | -2.24   | Down | 1.01E-124 | 2.84E-123 |
| Unigene2898   | Potri.002G255400.1 | 6.168   | 29.1399  | -2.2401 | Down | 3.84E-84  | 6.66E-83  |
| Unigene49747  | Potri.001G140300.1 | 13.7131 | 64.7839  | -2.2401 | Down | 4.58E-113 | 1.14E-111 |
| Unigene50524  | Potri.014G164300.4 | 8.5256  | 40.2809  | -2.2402 | Down | 3.43E-55  | 3.72E-54  |
| Unigene50391  | Potri.010G051900.3 | 10.2875 | 48.6061  | -2.2402 | Down | 2.10E-101 | 4.57E-100 |
| Unigene961    | Potri.005G009000.1 | 6.8327  | 32.2809  | -2.2402 | Down | 1.13E-69  | 1.59E-68  |
| Unigene50420  | Potri.006G027200.1 | 2.2409  | 10.5914  | -2.2407 | Down | 7.08E-19  | 3.02E-18  |
| Unigene31044  | Potri.008G151100.2 | 2.9956  | 14.1585  | -2.2408 | Down | 7.08E-19  | 3.02E-18  |
| Unigene13845  | Potri.009G168100.2 | 19.4917 | 92.1346  | -2.2409 | Down | 1.95E-214 | 1.10E-212 |
| Unigene49891  | Potri.019G112100.1 | 4.4361  | 20.9704  | -2.241  | Down | 5.56E-29  | 3.28E-28  |
| Unigene22278  | Potri.016G068900.3 | 6.1993  | 29.3058  | -2.241  | Down | 2.61E-267 | 1.97E-265 |
| Unigene7715   | Potri.010G028300.2 | 4.2307  | 19.9996  | -2.241  | Down | 2.33E-56  | 2.59E-55  |

|               |                    |         |          |         |      |           |           |
|---------------|--------------------|---------|----------|---------|------|-----------|-----------|
| Unigene975    | Potri.006G017400.1 | 3.4355  | 16.2403  | -2.241  | Down | 2.33E-56  | 2.59E-55  |
| Unigene25407  | Potri.002G132400.1 | 1.9098  | 9.028    | -2.241  | Down | 5.56E-29  | 3.28E-28  |
| Unigene15185  | Potri.015G127200.1 | 1.2862  | 6.0817   | -2.2414 | Down | 1.51E-11  | 4.69E-11  |
| Unigene106319 | Potri.002G084700.1 | 1.0846  | 5.1286   | -2.2414 | Down | 1.06E-21  | 5.00E-21  |
| Unigene119556 | Potri.015G110100.1 | 3.0454  | 14.4016  | -2.2415 | Down | 9.13E-65  | 1.18E-63  |
| Unigene11538  | Potri.019G098500.1 | 5.9667  | 28.2187  | -2.2416 | Down | 1.70E-110 | 4.13E-109 |
| Unigene28422  | Potri.012G091900.1 | 1.5211  | 7.1963   | -2.2421 | Down | 2.16E-14  | 7.67E-14  |
| Unigene60768  | Potri.013G041200.1 | 2.1182  | 10.0215  | -2.2422 | Down | 2.16E-14  | 7.67E-14  |
| Unigene12503  | Potri.012G095600.1 | 3.3784  | 15.9855  | -2.2424 | Down | 4.95E-43  | 4.16E-42  |
| Unigene45496  | Potri.006G208400.1 | 4.3547  | 20.6078  | -2.2425 | Down | 3.22E-121 | 8.80E-120 |
| Unigene15407  | Potri.006G190000.1 | 23.8596 | 112.909  | -2.2425 | Down | 5.71E-90  | 1.07E-88  |
| Unigene43385  | Potri.004G057800.1 | 5.8367  | 27.6216  | -2.2426 | Down | 1.00E-271 | 7.74E-270 |
| Unigene78825  | Potri.014G091200.1 | 15.4504 | 73.1404  | -2.243  | Down | 4.68E-57  | 5.27E-56  |
| Unigene32842  | Potri.001G211200.2 | 1.929   | 9.1321   | -2.2431 | Down | 7.37E-60  | 8.74E-59  |
| Unigene2871   | Potri.014G150000.1 | 1.5241  | 7.2161   | -2.2433 | Down | 7.10E-23  | 3.47E-22  |
| Unigene54227  | Potri.007G032700.1 | 10.9058 | 51.6385  | -2.2434 | Down | 2.89E-68  | 3.95E-67  |
| Unigene94838  | Potri.015G019100.1 | 5.1154  | 24.2259  | -2.2436 | Down | 1.65E-28  | 9.57E-28  |
| Unigene83020  | Potri.014G019400.1 | 64.503  | 305.468  | -2.2436 | Down | 1.12E-258 | 8.10E-257 |
| Unigene32860  | Potri.007G075000.2 | 10.5204 | 49.8224  | -2.2436 | Down | 2.71E-106 | 6.24E-105 |
| Unigene23420  | Potri.002G149500.1 | 7.0211  | 33.2513  | -2.2436 | Down | 2.03E-55  | 2.21E-54  |
| Unigene80933  | Potri.009G044200.1 | 15.009  | 71.0846  | -2.2437 | Down | 3.19E-58  | 3.67E-57  |
| Unigene56495  | Potri.015G101900.1 | 6.5243  | 30.9015  | -2.2438 | Down | 2.53E-31  | 1.59E-30  |
| Unigene29556  | Potri.008G123000.1 | 3.9617  | 18.7638  | -2.2438 | Down | 2.53E-31  | 1.59E-30  |
| Unigene46844  | Potri.005G093100.2 | 16.9671 | 80.3704  | -2.2439 | Down | 1.97E-69  | 2.75E-68  |
| Unigene106408 | Potri.001G312900.5 | 2.2629  | 10.7189  | -2.2439 | Down | 3.90E-34  | 2.64E-33  |
| Unigene92558  | Potri.001G450100.4 | 78.6667 | 372.8294 | -2.2447 | Down | 0         | 0         |
| Unigene11749  | Potri.005G122100.1 | 4.1323  | 19.5857  | -2.2448 | Down | 2.56E-171 | 1.09E-169 |
| Unigene105436 | Potri.005G195300.1 | 0.7038  | 3.3361   | -2.2449 | Down | 4.50E-04  | 8.01E-04  |
| Unigene113284 | Potri.001G403300.1 | 0.7401  | 3.5082   | -2.2449 | Down | 4.50E-04  | 8.01E-04  |
| Unigene38649  | Potri.T096100.1    | 1.6954  | 8.037    | -2.245  | Down | 7.02E-10  | 1.99E-09  |
| Unigene6689   | Potri.019G093000.1 | 9.8938  | 46.9005  | -2.245  | Down | 9.38E-58  | 1.07E-56  |
| Unigene60499  | Potri.018G127800.2 | 2.7426  | 13.0011  | -2.245  | Down | 7.02E-10  | 1.99E-09  |
| Unigene17315  | Potri.017G086900.1 | 1.5748  | 7.465    | -2.245  | Down | 3.15E-21  | 1.46E-20  |
| Unigene33486  | Potri.016G018400.1 | 5.0576  | 23.9749  | -2.245  | Down | 4.76E-24  | 2.42E-23  |
| Unigene25070  | Potri.015G080300.4 | 0.749   | 3.5505   | -2.245  | Down | 5.28E-07  | 1.24E-06  |
| Unigene19876  | Potri.014G180100.1 | 1.7818  | 8.4466   | -2.245  | Down | 7.02E-10  | 1.99E-09  |
| Unigene118688 | Potri.014G023300.1 | 0.7886  | 3.7382   | -2.245  | Down | 5.28E-07  | 1.24E-06  |
| Unigene115222 | Potri.013G127200.3 | 1.9631  | 9.306    | -2.245  | Down | 7.02E-10  | 1.99E-09  |
| Unigene26888  | Potri.013G053600.1 | 1.5388  | 7.2943   | -2.245  | Down | 1.43E-15  | 5.33E-15  |

|               |                    |         |          |         |      |           |           |
|---------------|--------------------|---------|----------|---------|------|-----------|-----------|
| Unigene107825 | Potri.013G034400.1 | 0.9187  | 4.355    | -2.245  | Down | 4.50E-04  | 8.01E-04  |
| Unigene17974  | Potri.013G008300.2 | 4.7215  | 22.3816  | -2.245  | Down | 4.76E-24  | 2.42E-23  |
| Unigene27385  | Potri.010G095500.1 | 0.8004  | 3.7943   | -2.245  | Down | 4.50E-04  | 8.01E-04  |
| Unigene82929  | Potri.009G013300.2 | 1.4075  | 6.6723   | -2.245  | Down | 5.28E-07  | 1.24E-06  |
| Unigene113816 | Potri.006G279100.1 | 0.7173  | 3.4003   | -2.245  | Down | 4.50E-04  | 8.01E-04  |
| Unigene20395  | Potri.006G264800.1 | 1.492   | 7.0726   | -2.245  | Down | 3.15E-21  | 1.46E-20  |
| Unigene14914  | Potri.006G247300.7 | 1.3393  | 6.3488   | -2.245  | Down | 9.86E-13  | 3.24E-12  |
| Unigene20147  | Potri.006G132900.1 | 1.903   | 9.0212   | -2.245  | Down | 7.02E-10  | 1.99E-09  |
| Unigene105422 | Potri.006G066000.1 | 7.9208  | 37.5476  | -2.245  | Down | 1.71E-32  | 1.11E-31  |
| Unigene36656  | Potri.006G010100.2 | 1.397   | 6.6223   | -2.245  | Down | 5.28E-07  | 1.24E-06  |
| Unigene111711 | Potri.005G258800.1 | 1.5872  | 7.524    | -2.245  | Down | 5.28E-07  | 1.24E-06  |
| Unigene111473 | Potri.005G222800.2 | 0.8004  | 3.7943   | -2.245  | Down | 4.50E-04  | 8.01E-04  |
| Unigene107113 | Potri.005G085400.2 | 0.9548  | 4.526    | -2.245  | Down | 7.02E-10  | 1.99E-09  |
| Unigene14641  | Potri.005G050500.1 | 0.752   | 3.5648   | -2.245  | Down | 4.50E-04  | 8.01E-04  |
| Unigene31151  | Potri.003G164300.1 | 1.8374  | 8.7101   | -2.245  | Down | 9.86E-13  | 3.24E-12  |
| Unigene115211 | Potri.003G107600.1 | 0.6567  | 3.1129   | -2.245  | Down | 4.50E-04  | 8.01E-04  |
| Unigene71599  | Potri.001G465300.2 | 5.4852  | 26.0022  | -2.245  | Down | 2.11E-18  | 8.83E-18  |
| Unigene118818 | Potri.001G353400.1 | 0.749   | 3.5505   | -2.245  | Down | 5.28E-07  | 1.24E-06  |
| Unigene4149   | Potri.001G308900.1 | 3.422   | 16.2216  | -2.245  | Down | 2.11E-18  | 8.83E-18  |
| Unigene111540 | Potri.001G218900.1 | 0.797   | 3.7781   | -2.245  | Down | 4.50E-04  | 8.01E-04  |
| Unigene16455  | Potri.001G166500.3 | 0.8363  | 3.9645   | -2.245  | Down | 4.50E-04  | 8.01E-04  |
| Unigene6548   | Potri.001G123000.1 | 2.5118  | 11.9067  | -2.245  | Down | 9.86E-13  | 3.24E-12  |
| Unigene19632  | Potri.001G029300.1 | 1.1372  | 5.3907   | -2.245  | Down | 5.28E-07  | 1.24E-06  |
| Unigene26918  | Potri.T116600.2    | 0.7612  | 3.6085   | -2.2451 | Down | 4.50E-04  | 8.01E-04  |
| Unigene15252  | Potri.019G112400.1 | 0.9613  | 4.5571   | -2.2451 | Down | 7.02E-10  | 1.99E-09  |
| Unigene39166  | Potri.018G038300.1 | 0.6453  | 3.0591   | -2.2451 | Down | 5.28E-07  | 1.24E-06  |
| Unigene5147   | Potri.013G043500.1 | 0.9395  | 4.4538   | -2.2451 | Down | 5.28E-07  | 1.24E-06  |
| Unigene19750  | Potri.002G111400.1 | 1.2237  | 5.801    | -2.2451 | Down | 1.43E-15  | 5.33E-15  |
| Unigene43418  | Potri.007G128300.3 | 9.1171  | 43.2242  | -2.2452 | Down | 2.13E-204 | 1.14E-202 |
| Unigene93459  | Potri.015G136900.2 | 36.9786 | 175.3348 | -2.2453 | Down | 0         | 0         |
| Unigene86369  | Potri.006G258800.1 | 15.7377 | 74.6297  | -2.2455 | Down | 6.25E-73  | 9.19E-72  |
| Unigene32275  | Potri.013G014100.1 | 6.0575  | 28.7277  | -2.2456 | Down | 5.65E-176 | 2.49E-174 |
| Unigene43537  | Potri.006G113400.3 | 6.7576  | 32.0464  | -2.2456 | Down | 4.56E-130 | 1.35E-128 |
| Unigene33303  | Potri.006G145200.1 | 7.5721  | 35.912   | -2.2457 | Down | 1.09E-107 | 2.56E-106 |
| Unigene73684  | Potri.013G077000.1 | 14.4272 | 68.4286  | -2.2458 | Down | 1.05E-47  | 9.79E-47  |
| Unigene11997  | Potri.015G063600.3 | 15.0108 | 71.1992  | -2.2459 | Down | 3.12E-131 | 9.38E-130 |
| Unigene22345  | Potri.008G186900.1 | 10.0028 | 47.4562  | -2.2462 | Down | 7.35E-95  | 1.47E-93  |
| Unigene64759  | Potri.014G046000.1 | 7.9491  | 37.7148  | -2.2463 | Down | 7.47E-31  | 4.65E-30  |
| Unigene107099 | Potri.001G314900.1 | 1.5879  | 7.5347   | -2.2464 | Down | 4.87E-28  | 2.79E-27  |



|               |                    |         |          |         |      |           |           |
|---------------|--------------------|---------|----------|---------|------|-----------|-----------|
| Unigene31808  | Potri.009G166900.2 | 8.2553  | 39.1798  | -2.2467 | Down | 0         | 0         |
| Unigene71632  | Potri.002G043100.1 | 37.8481 | 179.6515 | -2.2469 | Down | 6.08E-118 | 1.60E-116 |
| Unigene740    | Potri.011G149100.1 | 4.5155  | 21.4355  | -2.247  | Down | 1.19E-55  | 1.31E-54  |
| Unigene108684 | Potri.016G005400.2 | 5.7109  | 27.1106  | -2.2471 | Down | 1.40E-19  | 6.15E-19  |
| Unigene260    | Potri.018G129700.1 | 8.0914  | 38.4205  | -2.2474 | Down | 7.15E-232 | 4.44E-230 |
| Unigene19658  | Potri.006G190200.2 | 2.6856  | 12.7521  | -2.2474 | Down | 9.44E-17  | 3.71E-16  |
| Unigene25265  | Potri.006G011900.1 | 3.0426  | 14.4472  | -2.2474 | Down | 9.44E-17  | 3.71E-16  |
| Unigene107621 | Potri.004G123300.4 | 4.9856  | 23.6735  | -2.2474 | Down | 9.44E-17  | 3.71E-16  |
| Unigene119549 | Potri.001G340000.1 | 0.8141  | 3.8658   | -2.2475 | Down | 9.44E-17  | 3.71E-16  |
| Unigene54366  | Potri.002G026200.1 | 9.3124  | 44.2307  | -2.2478 | Down | 2.77E-106 | 6.39E-105 |
| Unigene115543 | Potri.013G028900.1 | 8.4597  | 40.1852  | -2.248  | Down | 8.17E-39  | 6.22E-38  |
| Unigene119134 | Potri.004G226200.1 | 1.3932  | 6.6179   | -2.248  | Down | 6.46E-14  | 2.25E-13  |
| Unigene14251  | Potri.004G049400.1 | 4.623   | 21.9604  | -2.248  | Down | 2.14E-26  | 1.17E-25  |
| Unigene14339  | Potri.017G106900.2 | 8.6671  | 41.1857  | -2.2485 | Down | 3.40E-33  | 2.25E-32  |
| Unigene40476  | Potri.012G130600.1 | 8.3014  | 39.4501  | -2.2486 | Down | 8.61E-43  | 7.20E-42  |
| Unigene29854  | Potri.013G009900.2 | 2.2094  | 10.5014  | -2.2489 | Down | 4.54E-11  | 1.38E-10  |
| Unigene30002  | Potri.007G137200.2 | 6.5596  | 31.1782  | -2.2489 | Down | 2.21E-30  | 1.36E-29  |
| Unigene51243  | Potri.001G343400.1 | 2.3398  | 11.1214  | -2.2489 | Down | 4.54E-11  | 1.38E-10  |
| Unigene58523  | Potri.001G307400.2 | 8.4546  | 40.1852  | -2.2489 | Down | 2.21E-30  | 1.36E-29  |
| Unigene30084  | Potri.001G106600.2 | 1.1764  | 5.5916   | -2.2489 | Down | 4.54E-11  | 1.38E-10  |
| Unigene6717   | Potri.010G093200.2 | 4.5632  | 21.6957  | -2.2493 | Down | 1.44E-27  | 8.15E-27  |
| Unigene23018  | Potri.006G188100.1 | 1.869   | 8.8863   | -2.2493 | Down | 1.44E-27  | 8.15E-27  |
| Unigene32128  | Potri.019G109700.1 | 3.3968  | 16.1515  | -2.2494 | Down | 2.56E-60  | 3.07E-59  |
| Unigene21841  | Potri.015G050400.1 | 9.1706  | 43.6052  | -2.2494 | Down | 7.21E-119 | 1.92E-117 |
| Unigene26554  | Potri.003G103000.2 | 2.5531  | 12.1428  | -2.2498 | Down | 9.45E-25  | 4.91E-24  |
| Unigene38607  | Potri.013G111200.1 | 4.2882  | 20.3977  | -2.25   | Down | 1.49E-31  | 9.45E-31  |
| Unigene24087  | Potri.008G007500.1 | 8.9542  | 42.5969  | -2.2501 | Down | 2.94E-175 | 1.29E-173 |
| Unigene24531  | Potri.010G138600.3 | 17.7775 | 84.5769  | -2.2502 | Down | 2.31E-122 | 6.37E-121 |
| Unigene44862  | Potri.001G148400.3 | 12.9688 | 61.6997  | -2.2502 | Down | 4.02E-129 | 1.18E-127 |
| Unigene106020 | Potri.001G319100.1 | 0.7853  | 3.7365   | -2.2504 | Down | 3.32E-08  | 8.52E-08  |
| Unigene94559  | Potri.019G037400.1 | 0.6534  | 3.1092   | -2.2505 | Down | 3.32E-08  | 8.52E-08  |
| Unigene51169  | Potri.005G189400.1 | 1.5224  | 7.2443   | -2.2505 | Down | 3.32E-08  | 8.52E-08  |
| Unigene97302  | Potri.005G046100.1 | 1.0556  | 5.0232   | -2.2505 | Down | 3.32E-08  | 8.52E-08  |
| Unigene21255  | Potri.001G334900.1 | 8.1561  | 38.8115  | -2.2505 | Down | 7.90E-229 | 4.82E-227 |
| Unigene32309  | Potri.001G017000.1 | 17.1358 | 81.5567  | -2.2508 | Down | 2.18E-282 | 1.77E-280 |
| Unigene24532  | Potri.010G087800.1 | 2.7968  | 13.3129  | -2.251  | Down | 8.10E-64  | 1.03E-62  |
| Unigene23795  | Potri.001G276000.1 | 2.3767  | 11.3163  | -2.2514 | Down | 1.05E-36  | 7.62E-36  |
| Unigene3130   | Potri.019G063700.1 | 1.9479  | 9.2755   | -2.2515 | Down | 1.83E-47  | 1.69E-46  |
| Unigene20202  | Potri.008G003000.1 | 2.1314  | 10.1496  | -2.2515 | Down | 3.26E-58  | 3.76E-57  |

|               |                    |         |          |         |      |           |           |
|---------------|--------------------|---------|----------|---------|------|-----------|-----------|
| Unigene12408  | Potri.019G034500.3 | 18.2797 | 87.0679  | -2.2519 | Down | 3.10E-141 | 1.02E-139 |
| Unigene106767 | Potri.009G160700.1 | 0.8367  | 3.9853   | -2.2519 | Down | 2.95E-12  | 9.50E-12  |
| Unigene37416  | Potri.001G280100.1 | 10.2215 | 48.6859  | -2.2519 | Down | 6.79E-34  | 4.57E-33  |
| Unigene91041  | Potri.002G113400.1 | 43.0379 | 205.0143 | -2.252  | Down | 3.23E-264 | 2.39E-262 |
| Unigene17428  | Potri.006G133000.6 | 6.8254  | 32.521   | -2.2524 | Down | 7.49E-42  | 6.13E-41  |
| Unigene3434   | Potri.006G101900.1 | 2.2397  | 10.6727  | -2.2525 | Down | 2.81E-16  | 1.08E-15  |
| Unigene29983  | Potri.003G083200.2 | 2.7948  | 13.3179  | -2.2525 | Down | 2.81E-16  | 1.08E-15  |
| Unigene104608 | Potri.017G089600.1 | 1.7256  | 8.223    | -2.2526 | Down | 2.81E-16  | 1.08E-15  |
| Unigene51644  | Potri.007G026600.1 | 1.1531  | 5.495    | -2.2526 | Down | 2.81E-16  | 1.08E-15  |
| Unigene42149  | Potri.005G111100.1 | 2.1647  | 10.3154  | -2.2526 | Down | 2.81E-16  | 1.08E-15  |
| Unigene12896  | Potri.017G086300.1 | 5.7162  | 27.2473  | -2.253  | Down | 2.44E-136 | 7.71E-135 |
| Unigene7815   | Potri.019G054200.3 | 4       | 19.0691  | -2.2532 | Down | 1.19E-69  | 1.66E-68  |
| Unigene43960  | Potri.008G197000.1 | 9.2098  | 43.9061  | -2.2532 | Down | 5.38E-47  | 4.94E-46  |
| Unigene32420  | Potri.008G191800.1 | 36.9653 | 176.2244 | -2.2532 | Down | 0         | 0         |
| Unigene8363   | Potri.012G108100.1 | 3.3584  | 16.0125  | -2.2534 | Down | 2.87E-28  | 1.66E-27  |
| Unigene45528  | Potri.005G156900.1 | 4.4872  | 21.3973  | -2.2535 | Down | 2.25E-101 | 4.90E-100 |
| Unigene94587  | Potri.019G103100.2 | 2.4822  | 11.8381  | -2.2537 | Down | 3.44E-44  | 2.96E-43  |
| Unigene24736  | Potri.014G099100.1 | 1.8078  | 8.6213   | -2.2537 | Down | 3.26E-40  | 2.57E-39  |
| Unigene39554  | Potri.T082300.1    | 2.3087  | 11.0114  | -2.2538 | Down | 4.15E-56  | 4.59E-55  |
| Unigene22312  | Potri.004G203200.1 | 2.2506  | 10.7349  | -2.2539 | Down | 4.45E-60  | 5.30E-59  |
| Unigene21126  | Potri.018G001800.2 | 15.2057 | 72.5294  | -2.254  | Down | 5.14E-68  | 7.00E-67  |
| Unigene53970  | Potri.007G040400.2 | 31.3228 | 149.4126 | -2.254  | Down | 5.76E-162 | 2.29E-160 |
| Unigene40075  | Potri.004G138000.1 | 18.752  | 89.4534  | -2.2541 | Down | 1.75E-209 | 9.60E-208 |
| Unigene11102  | Potri.019G126000.1 | 1.5269  | 7.285    | -2.2543 | Down | 1.88E-25  | 9.96E-25  |
| Unigene26108  | Potri.019G018400.1 | 8.4833  | 40.4754  | -2.2543 | Down | 2.10E-37  | 1.55E-36  |
| Unigene45862  | Potri.018G110200.1 | 1.978   | 9.4374   | -2.2543 | Down | 2.12E-09  | 5.84E-09  |
| Unigene107258 | Potri.016G055100.1 | 1.3055  | 6.2287   | -2.2543 | Down | 2.65E-05  | 5.39E-05  |
| Unigene3548   | Potri.012G067800.2 | 0.9292  | 4.4332   | -2.2543 | Down | 2.65E-05  | 5.39E-05  |
| Unigene60821  | Potri.011G116300.4 | 0.8211  | 3.9174   | -2.2543 | Down | 2.65E-05  | 5.39E-05  |
| Unigene25845  | Potri.011G002400.1 | 0.7985  | 3.8096   | -2.2543 | Down | 2.65E-05  | 5.39E-05  |
| Unigene38568  | Potri.010G216000.1 | 2.0777  | 9.9131   | -2.2543 | Down | 1.93E-13  | 6.58E-13  |
| Unigene30642  | Potri.010G203300.1 | 1.2144  | 5.7941   | -2.2543 | Down | 2.65E-05  | 5.39E-05  |
| Unigene35567  | Potri.008G110700.2 | 2.0559  | 9.809    | -2.2543 | Down | 1.93E-13  | 6.58E-13  |
| Unigene106731 | Potri.006G264800.1 | 1.3424  | 6.4048   | -2.2543 | Down | 2.12E-09  | 5.84E-09  |
| Unigene117076 | Potri.006G113000.2 | 0.759   | 3.6213   | -2.2543 | Down | 2.65E-05  | 5.39E-05  |
| Unigene20338  | Potri.005G100900.1 | 1.8007  | 8.5913   | -2.2543 | Down | 1.93E-13  | 6.58E-13  |
| Unigene26043  | Potri.004G066500.1 | 1.339   | 6.3884   | -2.2543 | Down | 2.12E-09  | 5.84E-09  |
| Unigene60544  | Potri.003G053200.3 | 1.1017  | 5.2563   | -2.2543 | Down | 2.65E-05  | 5.39E-05  |
| Unigene45849  | Potri.002G093600.1 | 0.7314  | 3.4895   | -2.2543 | Down | 2.65E-05  | 5.39E-05  |

|               |                    |         |          |         |      |           |           |
|---------------|--------------------|---------|----------|---------|------|-----------|-----------|
| Unigene114930 | Potri.019G055000.3 | 0.9358  | 4.465    | -2.2544 | Down | 2.65E-05  | 5.39E-05  |
| Unigene108066 | Potri.018G132100.2 | 1.2736  | 6.0768   | -2.2544 | Down | 2.65E-05  | 5.39E-05  |
| Unigene12523  | Potri.015G144700.4 | 1.855   | 8.8507   | -2.2544 | Down | 1.86E-17  | 7.53E-17  |
| Unigene48398  | Potri.014G066400.1 | 1.1761  | 5.6114   | -2.2544 | Down | 2.65E-05  | 5.39E-05  |
| Unigene103629 | Potri.012G106700.1 | 1.2695  | 6.0571   | -2.2544 | Down | 1.93E-13  | 6.58E-13  |
| Unigene33345  | Potri.010G113100.1 | 2.2625  | 10.795   | -2.2544 | Down | 1.85E-21  | 8.65E-21  |
| Unigene19558  | Potri.008G183400.1 | 2.0136  | 9.6073   | -2.2544 | Down | 1.93E-13  | 6.58E-13  |
| Unigene41457  | Potri.007G001000.1 | 0.7817  | 3.7298   | -2.2544 | Down | 2.65E-05  | 5.39E-05  |
| Unigene10239  | Potri.006G013000.1 | 1.2705  | 6.062    | -2.2544 | Down | 2.12E-09  | 5.84E-09  |
| Unigene95411  | Potri.005G095300.8 | 0.9358  | 4.465    | -2.2544 | Down | 2.65E-05  | 5.39E-05  |
| Unigene53663  | Potri.002G027900.1 | 6.5547  | 31.2738  | -2.2544 | Down | 1.88E-25  | 9.96E-25  |
| Unigene117359 | Potri.002G016800.1 | 0.7293  | 3.4797   | -2.2544 | Down | 2.65E-05  | 5.39E-05  |
| Unigene19224  | Potri.001G251900.1 | 1.892   | 9.0271   | -2.2544 | Down | 1.93E-13  | 6.58E-13  |
| Unigene110632 | Potri.001G238800.1 | 1.1604  | 5.5366   | -2.2544 | Down | 2.65E-05  | 5.39E-05  |
| Unigene118495 | Potri.009G023200.5 | 10.2636 | 48.9954  | -2.2551 | Down | 1.63E-71  | 2.34E-70  |
| Unigene49616  | Potri.002G188700.4 | 8.0951  | 38.6422  | -2.2551 | Down | 1.76E-75  | 2.69E-74  |
| Unigene19836  | Potri.014G001100.4 | 6.2166  | 29.6793  | -2.2553 | Down | 1.30E-30  | 8.04E-30  |
| Unigene3066   | Potri.001G206800.2 | 2.2937  | 10.9508  | -2.2553 | Down | 1.52E-88  | 2.79E-87  |
| Unigene84479  | Potri.010G178100.1 | 56.2836 | 268.7656 | -2.2556 | Down | 1.89E-240 | 1.24E-238 |
| Unigene3124   | Potri.012G060100.1 | 2.4842  | 11.8638  | -2.2557 | Down | 9.61E-40  | 7.49E-39  |
| Unigene332    | Potri.003G026600.2 | 1.8149  | 8.6674   | -2.2557 | Down | 9.61E-40  | 7.49E-39  |
| Unigene22407  | Potri.018G073000.2 | 11.766  | 56.1939  | -2.2558 | Down | 7.35E-112 | 1.81E-110 |
| Unigene50421  | Potri.010G060600.1 | 1.3385  | 6.3931   | -2.2559 | Down | 1.24E-18  | 5.24E-18  |
| Unigene22512  | Potri.001G392600.2 | 3.9998  | 19.1061  | -2.256  | Down | 7.31E-49  | 6.97E-48  |
| Unigene27091  | Potri.007G053200.1 | 29.7795 | 142.2686 | -2.2562 | Down | 3.44E-114 | 8.68E-113 |
| Unigene74208  | Potri.005G080500.2 | 13.185  | 62.988   | -2.2562 | Down | 6.88E-45  | 6.02E-44  |
| Unigene109908 | Potri.001G205800.8 | 16.8614 | 80.5539  | -2.2562 | Down | 5.66E-58  | 6.48E-57  |
| Unigene104875 | Potri.010G106400.3 | 1.0901  | 5.2082   | -2.2563 | Down | 1.27E-14  | 4.55E-14  |
| Unigene38268  | Potri.006G266000.2 | 1.2635  | 6.0367   | -2.2563 | Down | 1.27E-14  | 4.55E-14  |
| Unigene70563  | Potri.009G160400.1 | 4.2894  | 20.4945  | -2.2564 | Down | 1.27E-14  | 4.55E-14  |
| Unigene7143   | Potri.001G053500.1 | 17.3897 | 83.0856  | -2.2564 | Down | 3.80E-80  | 6.26E-79  |
| Unigene92665  | Potri.016G134600.1 | 22.7271 | 108.5977 | -2.2565 | Down | 1.13E-172 | 4.85E-171 |
| Unigene46701  | Potri.015G104200.3 | 5.912   | 28.257   | -2.2569 | Down | 5.92E-33  | 3.90E-32  |
| Unigene45082  | Potri.001G257000.4 | 10.0381 | 47.9832  | -2.257  | Down | 9.26E-110 | 2.23E-108 |
| Unigene25878  | Potri.016G016900.1 | 5.1448  | 24.5961  | -2.2572 | Down | 5.71E-29  | 3.37E-28  |
| Unigene43351  | Potri.010G102100.3 | 1.0619  | 5.0768   | -2.2573 | Down | 1.37E-10  | 4.03E-10  |
| Unigene114921 | Potri.008G127900.1 | 2.139   | 10.2263  | -2.2573 | Down | 1.37E-10  | 4.03E-10  |
| Unigene4397   | Potri.008G004300.4 | 19.8105 | 94.7104  | -2.2573 | Down | 1.52E-74  | 2.29E-73  |
| Unigene28024  | Potri.003G062700.1 | 1.8856  | 9.0147   | -2.2573 | Down | 8.24E-20  | 3.64E-19  |

|               |                    |         |          |         |      |           |           |
|---------------|--------------------|---------|----------|---------|------|-----------|-----------|
| Unigene119230 | Potri.001G248800.2 | 0.9398  | 4.4931   | -2.2573 | Down | 1.37E-10  | 4.03E-10  |
| Unigene32651  | Potri.002G167200.1 | 2.9783  | 14.2405  | -2.2574 | Down | 1.78E-61  | 2.18E-60  |
| Unigene48311  | Potri.006G227600.2 | 25.8624 | 123.6639 | -2.2575 | Down | 1.76E-144 | 5.96E-143 |
| Unigene52414  | Potri.003G077600.1 | 5.4423  | 26.0274  | -2.2577 | Down | 5.56E-25  | 2.91E-24  |
| Unigene33297  | Potri.005G099200.2 | 2.7406  | 13.107   | -2.2578 | Down | 5.56E-25  | 2.91E-24  |
| Unigene31395  | Potri.002G215600.2 | 9.5603  | 45.7253  | -2.2579 | Down | 7.06E-77  | 1.11E-75  |
| Unigene37433  | Potri.015G120400.4 | 3.5591  | 17.025   | -2.2581 | Down | 8.38E-16  | 3.16E-15  |
| Unigene25171  | Potri.009G068100.1 | 2.9049  | 13.8958  | -2.2581 | Down | 8.38E-16  | 3.16E-15  |
| Unigene4295   | Potri.006G111300.1 | 4.1629  | 19.9132  | -2.2581 | Down | 8.38E-16  | 3.16E-15  |
| Unigene16722  | Potri.005G116400.2 | 13.3739 | 63.9791  | -2.2582 | Down | 8.28E-64  | 1.05E-62  |
| Unigene73822  | Potri.T120400.2    | 5.9539  | 28.4881  | -2.2585 | Down | 5.50E-21  | 2.53E-20  |
| Unigene41842  | Potri.008G196500.1 | 9.8358  | 47.0662  | -2.2586 | Down | 1.38E-45  | 1.22E-44  |
| Unigene21142  | Potri.002G143200.1 | 3.6871  | 17.6445  | -2.2587 | Down | 3.73E-26  | 2.02E-25  |
| Unigene18054  | Potri.012G116200.2 | 2.0878  | 9.9922   | -2.2588 | Down | 2.59E-31  | 1.63E-30  |
| Unigene31599  | Potri.014G136200.1 | 31.4541 | 150.5446 | -2.2589 | Down | 8.59E-195 | 4.34E-193 |
| Unigene32255  | Potri.001G044900.1 | 4.5324  | 21.6936  | -2.2589 | Down | 9.46E-141 | 3.12E-139 |
| Unigene253    | Potri.007G078100.1 | 4.3063  | 20.6158  | -2.2592 | Down | 1.41E-77  | 2.24E-76  |
| Unigene10390  | Potri.006G110700.1 | 29.6081 | 141.762  | -2.2594 | Down | 9.78E-206 | 5.27E-204 |
| Unigene23781  | Potri.008G195900.4 | 19.4704 | 93.2297  | -2.2595 | Down | 4.22E-299 | 3.73E-297 |
| Unigene16428  | Potri.002G048000.1 | 11.9236 | 57.0937  | -2.2595 | Down | 1.78E-68  | 2.45E-67  |
| Unigene106559 | Potri.001G132600.1 | 1.7622  | 8.4378   | -2.2595 | Down | 8.86E-12  | 2.78E-11  |
| Unigene26420  | Potri.001G118400.1 | 0.852   | 4.0797   | -2.2595 | Down | 1.62E-06  | 3.66E-06  |
| Unigene45481  | Potri.001G109500.1 | 6.8911  | 32.9966  | -2.2595 | Down | 1.31E-73  | 1.95E-72  |
| Unigene47523  | Potri.008G147100.5 | 1.5121  | 7.2406   | -2.2596 | Down | 1.62E-06  | 3.66E-06  |
| Unigene103102 | Potri.004G061700.1 | 0.9844  | 4.7138   | -2.2596 | Down | 1.62E-06  | 3.66E-06  |
| Unigene116473 | Potri.001G021600.1 | 1.049   | 5.0232   | -2.2596 | Down | 1.62E-06  | 3.66E-06  |
| Unigene32280  | Potri.015G103700.1 | 3.0612  | 14.6635  | -2.2601 | Down | 8.36E-39  | 6.36E-38  |
| Unigene72355  | Potri.001G072000.1 | 11.7693 | 56.3763  | -2.2601 | Down | 8.36E-39  | 6.36E-38  |
| Unigene3902   | Potri.004G162800.2 | 12.4332 | 59.5699  | -2.2604 | Down | 5.65E-72  | 8.19E-71  |
| Unigene72277  | Potri.006G011500.2 | 15.7527 | 75.4936  | -2.2608 | Down | 1.99E-51  | 2.00E-50  |
| Unigene19440  | Potri.015G086800.2 | 15.8961 | 76.1901  | -2.2609 | Down | 2.63E-74  | 3.95E-73  |
| Unigene26893  | Potri.016G025000.3 | 2.4702  | 11.8427  | -2.2613 | Down | 5.78E-13  | 1.92E-12  |
| Unigene20590  | Potri.004G025200.1 | 2.4339  | 11.6688  | -2.2613 | Down | 1.65E-24  | 8.49E-24  |
| Unigene11808  | Potri.001G329100.1 | 3.7281  | 17.8756  | -2.2615 | Down | 3.29E-117 | 8.60E-116 |
| Unigene37323  | Potri.014G076500.1 | 6.537   | 31.3472  | -2.2616 | Down | 7.65E-31  | 4.76E-30  |
| Unigene19057  | Potri.001G271700.3 | 3.4462  | 16.5254  | -2.2616 | Down | 7.65E-31  | 4.76E-30  |
| Unigene100319 | Potri.008G197200.1 | 2.6704  | 12.8073  | -2.2618 | Down | 2.45E-19  | 1.06E-18  |
| Unigene18202  | Potri.001G079900.1 | 12.7692 | 61.2432  | -2.2619 | Down | 4.02E-132 | 1.22E-130 |
| Unigene21236  | Potri.011G164400.2 | 3.9485  | 18.9405  | -2.2621 | Down | 7.53E-194 | 3.77E-192 |

|               |                    |         |          |         |      |           |           |
|---------------|--------------------|---------|----------|---------|------|-----------|-----------|
| Unigene6401   | Potri.002G033800.1 | 1.7196  | 8.2488   | -2.2621 | Down | 1.10E-25  | 5.90E-25  |
| Unigene11499  | Potri.011G044400.1 | 10.1106 | 48.5078  | -2.2623 | Down | 1.74E-154 | 6.46E-153 |
| Unigene51115  | Potri.006G075200.1 | 1.1558  | 5.5467   | -2.2627 | Down | 1.01E-07  | 2.50E-07  |
| Unigene37111  | Potri.018G124100.1 | 0.9432  | 4.5266   | -2.2628 | Down | 1.01E-07  | 2.50E-07  |
| Unigene42980  | Potri.018G056300.1 | 1.1979  | 5.7491   | -2.2628 | Down | 3.79E-14  | 1.33E-13  |
| Unigene33747  | Potri.018G050300.1 | 3.1971  | 15.3434  | -2.2628 | Down | 1.63E-20  | 7.38E-20  |
| Unigene20629  | Potri.017G073900.1 | 2.1824  | 10.4738  | -2.2628 | Down | 3.79E-14  | 1.33E-13  |
| Unigene20380  | Potri.012G103700.1 | 1.0335  | 4.9599   | -2.2628 | Down | 1.01E-07  | 2.50E-07  |
| Unigene67596  | Potri.008G202100.2 | 1.8022  | 8.6489   | -2.2628 | Down | 1.63E-20  | 7.38E-20  |
| Unigene8857   | Potri.003G143700.5 | 3.1806  | 15.2641  | -2.2628 | Down | 3.79E-14  | 1.33E-13  |
| Unigene40943  | Potri.003G019500.1 | 1.4706  | 7.0576   | -2.2628 | Down | 1.01E-07  | 2.50E-07  |
| Unigene3408   | Potri.001G130100.4 | 1.9445  | 9.3321   | -2.2628 | Down | 1.01E-07  | 2.50E-07  |
| Unigene32088  | Potri.006G102800.1 | 10.7069 | 51.3884  | -2.2629 | Down | 8.00E-300 | 7.08E-298 |
| Unigene22500  | Potri.002G006600.1 | 3.3773  | 16.2132  | -2.2632 | Down | 1.13E-40  | 9.00E-40  |
| Unigene49770  | Potri.019G014300.1 | 10.2729 | 49.3216  | -2.2634 | Down | 3.92E-87  | 7.08E-86  |
| Unigene39886  | Potri.002G187500.2 | 2.7365  | 13.1387  | -2.2634 | Down | 4.99E-28  | 2.86E-27  |
| Unigene2760   | Potri.007G004100.2 | 9.0869  | 43.635   | -2.2636 | Down | 6.19E-62  | 7.61E-61  |
| Unigene68026  | Potri.004G236900.4 | 5.2124  | 25.029   | -2.2636 | Down | 2.39E-108 | 5.65E-107 |
| Unigene39909  | Potri.004G228200.1 | 2.5851  | 12.4136  | -2.2636 | Down | 1.09E-21  | 5.13E-21  |
| Unigene980    | Potri.015G002300.1 | 12.5351 | 60.1955  | -2.2637 | Down | 9.26E-96  | 1.87E-94  |
| Unigene45090  | Potri.013G075300.2 | 5.1866  | 24.9077  | -2.2637 | Down | 1.25E-55  | 1.37E-54  |
| Unigene46619  | Potri.018G121200.1 | 5.614   | 26.961   | -2.2638 | Down | 1.59E-35  | 1.12E-34  |
| Unigene15832  | Potri.005G004900.3 | 10.3541 | 49.7275  | -2.2638 | Down | 2.53E-49  | 2.44E-48  |
| Unigene46778  | Potri.011G114300.5 | 1.029   | 4.9423   | -2.2639 | Down | 2.50E-15  | 9.23E-15  |
| Unigene29460  | Potri.005G075000.1 | 9.8281  | 47.2017  | -2.2639 | Down | 6.33E-97  | 1.30E-95  |
| Unigene1788   | Potri.012G013900.2 | 4.077   | 19.5828  | -2.264  | Down | 4.32E-98  | 9.03E-97  |
| Unigene49398  | Potri.007G112900.1 | 4.5907  | 22.0503  | -2.264  | Down | 3.36E-29  | 1.99E-28  |
| Unigene10512  | Potri.014G172200.1 | 11.868  | 57.0092  | -2.2641 | Down | 4.91E-78  | 7.82E-77  |
| Unigene4180   | Potri.001G373100.1 | 3.0185  | 14.5012  | -2.2643 | Down | 5.77E-58  | 6.61E-57  |
| Unigene25354  | Potri.008G014800.2 | 19.0562 | 91.56    | -2.2645 | Down | 8.52E-123 | 2.36E-121 |
| Unigene9137   | Potri.006G004300.1 | 24.104  | 115.8168 | -2.2645 | Down | 2.28E-80  | 3.77E-79  |
| Unigene15066  | Potri.007G032700.1 | 11.8821 | 57.1053  | -2.2648 | Down | 9.08E-68  | 1.23E-66  |
| Unigene33582  | Potri.012G074900.3 | 2.6098  | 12.5444  | -2.265  | Down | 4.92E-39  | 3.77E-38  |
| Unigene10598  | Potri.010G128300.1 | 1.2276  | 5.9006   | -2.265  | Down | 6.41E-09  | 1.71E-08  |
| Unigene46225  | Potri.004G137000.3 | 1.6837  | 8.0929   | -2.265  | Down | 6.41E-09  | 1.71E-08  |
| Unigene1879   | Potri.003G085000.2 | 6.6323  | 31.8794  | -2.265  | Down | 6.18E-69  | 8.55E-68  |
| Unigene101031 | Potri.014G180600.1 | 0.7027  | 3.3779   | -2.2651 | Down | 6.41E-09  | 1.71E-08  |
| Unigene25242  | Potri.003G137100.1 | 0.88    | 4.23     | -2.2651 | Down | 6.41E-09  | 1.71E-08  |
| Unigene67219  | Potri.018G128000.3 | 9.8157  | 47.1912  | -2.2654 | Down | 1.10E-47  | 1.02E-46  |

|               |                    |         |          |         |      |           |           |
|---------------|--------------------|---------|----------|---------|------|-----------|-----------|
| Unigene37444  | Potri.006G120200.1 | 11.2849 | 54.2628  | -2.2656 | Down | 2.50E-56  | 2.77E-55  |
| Unigene36686  | Potri.T149500.1    | 23.819  | 114.5497 | -2.2658 | Down | 8.98E-137 | 2.85E-135 |
| Unigene14009  | Potri.018G124700.4 | 4.7689  | 22.9368  | -2.2659 | Down | 1.09E-17  | 4.47E-17  |
| Unigene18733  | Potri.010G015900.1 | 2.4749  | 11.9032  | -2.2659 | Down | 1.09E-17  | 4.47E-17  |
| Unigene103893 | Potri.001G271700.3 | 2.8692  | 13.7999  | -2.2659 | Down | 1.09E-17  | 4.47E-17  |
| Unigene50589  | Potri.014G128500.1 | 4.1186  | 19.8114  | -2.2661 | Down | 1.53E-42  | 1.27E-41  |
| Unigene13345  | Potri.008G168300.1 | 2.2881  | 11.0087  | -2.2664 | Down | 1.04E-43  | 8.83E-43  |
| Unigene38772  | Potri.013G115200.1 | 1.9814  | 9.5334   | -2.2665 | Down | 5.35E-61  | 6.47E-60  |
| Unigene100911 | Potri.013G082000.1 | 1.0173  | 4.8953   | -2.2667 | Down | 7.27E-19  | 3.10E-18  |
| Unigene34665  | Potri.012G066600.2 | 2.4013  | 11.5554  | -2.2667 | Down | 7.02E-45  | 6.14E-44  |
| Unigene96834  | Potri.008G190900.1 | 1.4346  | 6.9036   | -2.2667 | Down | 4.11E-10  | 1.18E-09  |
| Unigene33194  | Potri.005G246500.3 | 1.1465  | 5.5172   | -2.2667 | Down | 7.27E-19  | 3.10E-18  |
| Unigene83084  | Potri.005G213400.3 | 2.1034  | 10.1218  | -2.2667 | Down | 4.11E-10  | 1.18E-09  |
| Unigene16824  | Potri.004G071000.1 | 2.7426  | 13.1981  | -2.2667 | Down | 4.11E-10  | 1.18E-09  |
| Unigene25670  | Potri.004G069400.1 | 1.2203  | 5.8722   | -2.2667 | Down | 7.27E-19  | 3.10E-18  |
| Unigene107018 | Potri.003G129900.2 | 1.0247  | 4.9312   | -2.2667 | Down | 7.27E-19  | 3.10E-18  |
| Unigene44837  | Potri.017G021800.1 | 3.73    | 17.9562  | -2.2672 | Down | 3.23E-47  | 2.98E-46  |
| Unigene106878 | Potri.008G116800.4 | 3.3843  | 16.2913  | -2.2672 | Down | 9.92E-29  | 5.81E-28  |
| Unigene38903  | Potri.019G014300.2 | 7.4136  | 35.6924  | -2.2674 | Down | 1.45E-38  | 1.10E-37  |
| Unigene15905  | Potri.009G113300.1 | 3.9134  | 18.8409  | -2.2674 | Down | 4.84E-20  | 2.16E-19  |
| Unigene33865  | Potri.010G014800.1 | 8.2227  | 39.5982  | -2.2678 | Down | 2.19E-97  | 4.54E-96  |
| Unigene43801  | Potri.008G118600.1 | 9.3774  | 45.1612  | -2.2678 | Down | 5.79E-79  | 9.36E-78  |
| Unigene32399  | Potri.019G029400.2 | 4.9693  | 23.9327  | -2.2679 | Down | 1.50E-98  | 3.16E-97  |
| Unigene77692  | Potri.015G136600.1 | 2.7332  | 13.1641  | -2.2679 | Down | 2.66E-11  | 8.15E-11  |
| Unigene40126  | Potri.001G399700.1 | 13.6224 | 65.6067  | -2.2679 | Down | 1.50E-98  | 3.16E-97  |
| Unigene94522  | Potri.015G061400.1 | 1.1105  | 5.3486   | -2.268  | Down | 2.66E-11  | 8.15E-11  |
| Unigene14334  | Potri.013G047500.2 | 9.0262  | 43.4744  | -2.268  | Down | 6.64E-41  | 5.33E-40  |
| Unigene82506  | Potri.010G166100.6 | 21.7818 | 104.911  | -2.268  | Down | 6.34E-90  | 1.19E-88  |
| Unigene99284  | Potri.002G024800.2 | 1.9042  | 9.1714   | -2.268  | Down | 2.66E-11  | 8.15E-11  |
| Unigene48440  | Potri.002G157500.3 | 17.9448 | 86.4465  | -2.2682 | Down | 1.84E-82  | 3.12E-81  |
| Unigene38671  | Potri.015G010200.3 | 17.0185 | 81.9854  | -2.2683 | Down | 5.31E-113 | 1.32E-111 |
| Unigene33401  | Potri.003G123600.1 | 5.3543  | 25.7963  | -2.2684 | Down | 4.67E-53  | 4.86E-52  |
| Unigene26311  | Potri.001G087300.1 | 5.8637  | 28.2525  | -2.2685 | Down | 2.16E-22  | 1.04E-21  |
| Unigene49627  | Potri.001G467800.3 | 14.8967 | 71.786   | -2.2687 | Down | 3.66E-76  | 5.66E-75  |
| Unigene11268  | Potri.002G149500.1 | 12.6915 | 61.165   | -2.2688 | Down | 7.70E-153 | 2.83E-151 |
| Unigene116460 | Potri.010G216300.2 | 2.2147  | 10.6742  | -2.2689 | Down | 1.73E-12  | 5.63E-12  |
| Unigene32343  | Potri.018G025600.2 | 4.2373  | 20.423   | -2.269  | Down | 1.40E-45  | 1.25E-44  |
| Unigene12228  | Potri.017G130400.2 | 4.5648  | 22.0016  | -2.269  | Down | 1.40E-45  | 1.25E-44  |
| Unigene36957  | Potri.010G200500.9 | 3.7696  | 18.1688  | -2.269  | Down | 1.44E-23  | 7.22E-23  |

|               |                     |         |          |         |      |           |           |
|---------------|---------------------|---------|----------|---------|------|-----------|-----------|
| Unigene83469  | Potri.003G134500.1  | 42.2728 | 203.7539 | -2.269  | Down | 3.17E-178 | 1.42E-176 |
| Unigene28723  | Potri.001G358500.2  | 3.5702  | 17.2078  | -2.269  | Down | 1.44E-23  | 7.22E-23  |
| Unigene83543  | Potri.019G112400.1  | 29.4252 | 141.8389 | -2.2691 | Down | 1.19E-124 | 3.35E-123 |
| Unigene75091  | Potri.016G038100.10 | 22.9929 | 110.8304 | -2.2691 | Down | 1.16E-79  | 1.90E-78  |
| Unigene45261  | Potri.008G205100.2  | 11.7817 | 56.7974  | -2.2693 | Down | 5.57E-127 | 1.60E-125 |
| Unigene12484  | Potri.004G026000.1  | 4.5752  | 22.0559  | -2.2693 | Down | 9.34E-36  | 6.61E-35  |
| Unigene39060  | Potri.013G144100.1  | 3.6479  | 17.5872  | -2.2694 | Down | 9.67E-25  | 5.02E-24  |
| Unigene28287  | Potri.013G062500.4  | 3.089   | 14.8927  | -2.2694 | Down | 9.67E-25  | 5.02E-24  |
| Unigene14924  | Potri.004G158000.1  | 4.9403  | 23.8184  | -2.2694 | Down | 6.46E-48  | 6.05E-47  |
| Unigene25820  | Potri.011G146300.1  | 7.3878  | 35.6231  | -2.2696 | Down | 1.89E-96  | 3.86E-95  |
| Unigene119380 | Potri.010G059200.1  | 2.1638  | 10.4348  | -2.2698 | Down | 6.49E-26  | 3.49E-25  |
| Unigene113507 | Potri.010G034800.3  | 3.0597  | 14.7555  | -2.2698 | Down | 1.13E-13  | 3.90E-13  |
| Unigene13442  | Potri.004G040000.4  | 7.7644  | 37.4437  | -2.2698 | Down | 8.51E-208 | 4.62E-206 |
| Unigene27109  | Potri.002G045500.1  | 2.1401  | 10.3208  | -2.2698 | Down | 1.13E-13  | 3.90E-13  |
| Unigene11167  | Potri.007G003200.4  | 4.5557  | 21.9715  | -2.2699 | Down | 1.07E-75  | 1.65E-74  |
| Unigene517    | Potri.012G056000.2  | 22.4599 | 108.3488 | -2.2703 | Down | 3.58E-131 | 1.08E-129 |
| Unigene19310  | Potri.007G092900.1  | 3.9902  | 19.2515  | -2.2704 | Down | 7.45E-15  | 2.70E-14  |
| Unigene85841  | Potri.004G202800.5  | 34.7622 | 167.7117 | -2.2704 | Down | 4.67E-160 | 1.82E-158 |
| Unigene5773   | Potri.003G121500.1  | 2.928   | 14.1265  | -2.2704 | Down | 7.45E-15  | 2.70E-14  |
| Unigene102444 | Potri.016G127500.1  | 1.075   | 5.1868   | -2.2705 | Down | 7.45E-15  | 2.70E-14  |
| Unigene54454  | Potri.012G119000.1  | 3.4592  | 16.6898  | -2.2705 | Down | 7.45E-15  | 2.70E-14  |
| Unigene22923  | Potri.001G188800.4  | 1.1355  | 5.4786   | -2.2705 | Down | 2.93E-28  | 1.69E-27  |
| Unigene73477  | Potri.003G194500.1  | 16.6169 | 80.18    | -2.2706 | Down | 4.32E-56  | 4.78E-55  |
| Unigene25298  | Potri.005G094600.3  | 4.9458  | 23.8669  | -2.2707 | Down | 1.97E-29  | 1.18E-28  |
| Unigene21446  | Potri.005G034100.1  | 3.2376  | 15.6235  | -2.2707 | Down | 2.94E-57  | 3.32E-56  |
| Unigene22475  | Potri.001G156600.8  | 3.65    | 17.6147  | -2.2708 | Down | 6.09E-44  | 5.22E-43  |
| Unigene11747  | Potri.006G068100.1  | 3.5638  | 17.2     | -2.2709 | Down | 2.35E-87  | 4.26E-86  |
| Unigene38359  | Potri.003G170700.1  | 12.2999 | 59.3621  | -2.2709 | Down | 6.78E-73  | 9.97E-72  |
| Unigene7182   | Potri.002G061300.4  | 2.7835  | 13.4351  | -2.271  | Down | 4.92E-16  | 1.87E-15  |
| Unigene3013   | Potri.017G153200.1  | 4.1854  | 20.2031  | -2.2711 | Down | 9.26E-61  | 1.12E-59  |
| Unigene20127  | Potri.019G110600.1  | 8.1132  | 39.1635  | -2.2712 | Down | 2.80E-46  | 2.53E-45  |
| Unigene37302  | Potri.018G095800.3  | 9.0213  | 43.5495  | -2.2712 | Down | 8.96E-32  | 5.71E-31  |
| Unigene21213  | Potri.017G128000.1  | 4.5529  | 21.9805  | -2.2714 | Down | 4.54E-170 | 1.92E-168 |
| Unigene3041   | Potri.008G207700.1  | 13.0929 | 63.2097  | -2.2714 | Down | 0         | 0         |
| Unigene27846  | Potri.017G061600.1  | 3.8003  | 18.3487  | -2.2715 | Down | 6.04E-33  | 3.98E-32  |
| Unigene37909  | Potri.017G052000.1  | 3.7162  | 17.9425  | -2.2715 | Down | 3.25E-17  | 1.30E-16  |
| Unigene50997  | Potri.001G412100.1  | 3.0704  | 14.8244  | -2.2715 | Down | 3.25E-17  | 1.30E-16  |
| Unigene35885  | Potri.011G070100.1  | 11.9531 | 57.7177  | -2.2716 | Down | 8.76E-50  | 8.52E-49  |
| Unigene19688  | Potri.019G066500.1  | 3.2978  | 15.9271  | -2.2719 | Down | 2.16E-18  | 9.06E-18  |

|               |                    |         |          |         |      |           |           |
|---------------|--------------------|---------|----------|---------|------|-----------|-----------|
| Unigene105195 | Potri.014G087300.2 | 1.2306  | 5.9432   | -2.2719 | Down | 2.16E-18  | 9.06E-18  |
| Unigene114606 | Potri.008G169500.2 | 3.9622  | 19.1358  | -2.2719 | Down | 2.16E-18  | 9.06E-18  |
| Unigene40995  | Potri.001G051200.2 | 2.3162  | 11.1865  | -2.2719 | Down | 2.16E-18  | 9.06E-18  |
| Unigene100958 | Potri.008G067200.1 | 0.8084  | 3.9044   | -2.272  | Down | 2.16E-18  | 9.06E-18  |
| Unigene1385   | Potri.004G106400.1 | 6.3298  | 30.5714  | -2.272  | Down | 1.88E-120 | 5.10E-119 |
| Unigene9913   | Potri.002G129100.2 | 1.354   | 6.5407   | -2.2722 | Down | 1.44E-19  | 6.30E-19  |
| Unigene10905  | Potri.012G036500.1 | 10.8556 | 52.4511  | -2.2725 | Down | 0         | 0         |
| Unigene72587  | Potri.001G134000.2 | 48.2912 | 233.346  | -2.2726 | Down | 5.04E-157 | 1.92E-155 |
| Unigene46044  | Potri.009G100800.3 | 17.8691 | 86.3515  | -2.2728 | Down | 1.85E-61  | 2.26E-60  |
| Unigene53833  | Potri.006G168800.1 | 8.0835  | 39.0655  | -2.2728 | Down | 2.65E-42  | 2.19E-41  |
| Unigene63814  | Potri.009G020600.2 | 5.0095  | 24.2098  | -2.2729 | Down | 3.32E-103 | 7.37E-102 |
| Unigene39463  | Potri.003G080200.2 | 3.3909  | 16.3891  | -2.273  | Down | 5.85E-65  | 7.58E-64  |
| Unigene90801  | Potri.017G135800.1 | 20.8272 | 100.667  | -2.2731 | Down | 2.65E-129 | 7.81E-128 |
| Unigene33913  | Potri.012G086700.1 | 2.6902  | 13.0034  | -2.2731 | Down | 4.28E-23  | 2.11E-22  |
| Unigene19123  | Potri.015G048300.1 | 18.8492 | 91.1151  | -2.2732 | Down | 2.32E-111 | 5.69E-110 |
| Unigene70320  | Potri.016G064600.1 | 4.1922  | 20.2663  | -2.2733 | Down | 5.60E-47  | 5.13E-46  |
| Unigene3302   | Potri.005G260100.2 | 10.6876 | 51.6667  | -2.2733 | Down | 4.63E-204 | 2.46E-202 |
| Unigene49573  | Potri.013G060900.3 | 7.8829  | 38.1138  | -2.2735 | Down | 2.58E-49  | 2.48E-48  |
| Unigene32554  | Potri.010G249600.1 | 2.7292  | 13.1967  | -2.2736 | Down | 1.75E-50  | 1.73E-49  |
| Unigene46953  | Potri.010G010100.1 | 2.9655  | 14.3417  | -2.2739 | Down | 8.66E-28  | 4.93E-27  |
| Unigene46376  | Potri.008G060800.1 | 11.6561 | 56.3709  | -2.2739 | Down | 5.49E-54  | 5.81E-53  |
| Unigene71003  | Potri.005G170800.2 | 8.3506  | 40.3851  | -2.2739 | Down | 8.66E-28  | 4.93E-27  |
| Unigene47156  | Potri.003G040900.1 | 12.9088 | 62.4371  | -2.274  | Down | 4.64E-112 | 1.15E-110 |
| Unigene31683  | Potri.010G046800.1 | 2.9767  | 14.3986  | -2.2741 | Down | 3.92E-30  | 2.39E-29  |
| Unigene12003  | Potri.010G030500.1 | 1.468   | 7.101    | -2.2742 | Down | 3.92E-30  | 2.39E-29  |
| Unigene19400  | Potri.019G018000.1 | 4.9176  | 23.7912  | -2.2744 | Down | 1.78E-32  | 1.16E-31  |
| Unigene34896  | Potri.001G082100.1 | 30.1688 | 145.9668 | -2.2745 | Down | 1.91E-161 | 7.55E-160 |
| Unigene43851  | Potri.018G113600.2 | 6.0632  | 29.3369  | -2.2746 | Down | 7.97E-67  | 1.07E-65  |
| Unigene24867  | Potri.001G201800.1 | 15.1322 | 73.22    | -2.2746 | Down | 5.43E-68  | 7.40E-67  |
| Unigene65186  | Potri.018G089700.4 | 6.6528  | 32.1952  | -2.2748 | Down | 3.71E-37  | 2.72E-36  |
| Unigene43934  | Potri.002G213500.2 | 6.3013  | 30.4948  | -2.2748 | Down | 7.99E-74  | 1.19E-72  |
| Unigene22082  | Potri.015G042800.4 | 11.6593 | 56.426   | -2.2749 | Down | 0         | 0         |
| Unigene72678  | Potri.017G135800.1 | 68.5021 | 331.7211 | -2.2758 | Down | 7.64E-224 | 4.53E-222 |
| Unigene27968  | Potri.019G103000.1 | 13.6632 | 66.1874  | -2.2763 | Down | 3.30E-161 | 1.30E-159 |
| Unigene6206   | Potri.014G116500.6 | 0.7853  | 3.807    | -2.2773 | Down | 4.97E-06  | 1.08E-05  |
| Unigene115904 | Potri.011G053600.2 | 0.7411  | 3.5927   | -2.2773 | Down | 8.26E-05  | 1.60E-04  |
| Unigene3985   | Potri.001G300700.1 | 0.7105  | 3.4444   | -2.2773 | Down | 4.97E-06  | 1.08E-05  |
| Unigene26388  | Potri.TI16200.1    | 1.3428  | 6.51     | -2.2774 | Down | 5.19E-12  | 1.65E-11  |
| Unigene105377 | Potri.019G126300.1 | 1.2559  | 6.0887   | -2.2774 | Down | 3.08E-07  | 7.37E-07  |



|               |                    |         |         |         |      |           |           |
|---------------|--------------------|---------|---------|---------|------|-----------|-----------|
| Unigene9529   | Potri.019G050200.2 | 0.8289  | 4.0185  | -2.2774 | Down | 4.97E-06  | 1.08E-05  |
| Unigene99350  | Potri.018G082100.1 | 1.5186  | 7.3622  | -2.2774 | Down | 7.99E-11  | 2.39E-10  |
| Unigene105661 | Potri.018G031900.2 | 0.7201  | 3.491   | -2.2774 | Down | 3.08E-07  | 7.37E-07  |
| Unigene97662  | Potri.018G000500.3 | 1.2399  | 6.0111  | -2.2774 | Down | 1.94E-08  | 5.05E-08  |
| Unigene102629 | Potri.017G119600.2 | 1.2591  | 6.1041  | -2.2774 | Down | 4.97E-06  | 1.08E-05  |
| Unigene20721  | Potri.017G043100.1 | 0.8846  | 4.2885  | -2.2774 | Down | 8.26E-05  | 1.60E-04  |
| Unigene41884  | Potri.017G012600.3 | 7.0229  | 34.0481 | -2.2774 | Down | 3.23E-54  | 3.43E-53  |
| Unigene7168   | Potri.016G120700.2 | 1.3165  | 6.3824  | -2.2774 | Down | 1.94E-08  | 5.05E-08  |
| Unigene5774   | Potri.016G063800.3 | 1.2862  | 6.2356  | -2.2774 | Down | 1.94E-08  | 5.05E-08  |
| Unigene115848 | Potri.016G059300.2 | 0.9914  | 4.8062  | -2.2774 | Down | 4.97E-06  | 1.08E-05  |
| Unigene4209   | Potri.016G015900.1 | 0.7016  | 3.4013  | -2.2774 | Down | 8.26E-05  | 1.60E-04  |
| Unigene48539  | Potri.015G069200.1 | 0.6994  | 3.3906  | -2.2774 | Down | 8.26E-05  | 1.60E-04  |
| Unigene6244   | Potri.014G194800.1 | 5.8054  | 28.1453 | -2.2774 | Down | 5.68E-25  | 2.97E-24  |
| Unigene117339 | Potri.014G037400.1 | 0.6269  | 3.0392  | -2.2774 | Down | 8.26E-05  | 1.60E-04  |
| Unigene3470   | Potri.013G130000.1 | 1.7065  | 8.2734  | -2.2774 | Down | 1.24E-09  | 3.46E-09  |
| Unigene25163  | Potri.013G033800.1 | 1.0875  | 5.2721  | -2.2774 | Down | 3.08E-07  | 7.36E-07  |
| Unigene33294  | Potri.012G051800.1 | 1.8798  | 9.1136  | -2.2774 | Down | 8.47E-24  | 4.27E-23  |
| Unigene40418  | Potri.011G122900.1 | 2.7934  | 13.5426 | -2.2774 | Down | 1.89E-21  | 8.84E-21  |
| Unigene115444 | Potri.011G041600.1 | 0.7744  | 3.7543  | -2.2774 | Down | 8.26E-05  | 1.60E-04  |
| Unigene100265 | Potri.011G002400.1 | 0.9082  | 4.4029  | -2.2774 | Down | 1.24E-09  | 3.46E-09  |
| Unigene27212  | Potri.010G065600.2 | 4.0423  | 19.5977 | -2.2774 | Down | 2.22E-14  | 7.87E-14  |
| Unigene114267 | Potri.009G160500.5 | 0.8382  | 4.0637  | -2.2774 | Down | 8.26E-05  | 1.60E-04  |
| Unigene42841  | Potri.009G139900.1 | 3.9473  | 19.1369 | -2.2774 | Down | 1.57E-105 | 3.59E-104 |
| Unigene23364  | Potri.009G108900.1 | 1.3894  | 6.7359  | -2.2774 | Down | 9.68E-17  | 3.80E-16  |
| Unigene74016  | Potri.009G084600.4 | 1.0458  | 5.0701  | -2.2774 | Down | 8.26E-05  | 1.60E-04  |
| Unigene10068  | Potri.008G195300.5 | 0.9443  | 4.5781  | -2.2774 | Down | 1.94E-08  | 5.05E-08  |
| Unigene45581  | Potri.008G075900.1 | 1.1818  | 5.7294  | -2.2774 | Down | 7.99E-11  | 2.39E-10  |
| Unigene111757 | Potri.008G067200.1 | 0.9483  | 4.5975  | -2.2774 | Down | 8.26E-05  | 1.60E-04  |
| Unigene26187  | Potri.008G016900.1 | 1.0713  | 5.1936  | -2.2774 | Down | 2.22E-14  | 7.87E-14  |
| Unigene43125  | Potri.007G030800.1 | 2.5878  | 12.5459 | -2.2774 | Down | 2.18E-69  | 3.03E-68  |
| Unigene11556  | Potri.006G224800.4 | 6.9752  | 33.8167 | -2.2774 | Down | 1.48E-70  | 2.10E-69  |
| Unigene16121  | Potri.006G203000.5 | 4.3882  | 21.2745 | -2.2774 | Down | 1.46E-15  | 5.47E-15  |
| Unigene113862 | Potri.006G108700.1 | 0.8575  | 4.1571  | -2.2774 | Down | 8.26E-05  | 1.60E-04  |
| Unigene28988  | Potri.005G122500.1 | 2.4459  | 11.8579 | -2.2774 | Down | 2.20E-55  | 2.39E-54  |
| Unigene34477  | Potri.005G099000.1 | 5.699   | 27.6298 | -2.2774 | Down | 1.04E-92  | 2.02E-91  |
| Unigene5031   | Potri.004G126500.1 | 1.772   | 8.5907  | -2.2774 | Down | 3.39E-13  | 1.14E-12  |
| Unigene57529  | Potri.004G120500.1 | 1.0219  | 4.9543  | -2.2774 | Down | 7.99E-11  | 2.39E-10  |
| Unigene16089  | Potri.004G059000.1 | 13.5101 | 65.4987 | -2.2774 | Down | 2.20E-55  | 2.39E-54  |
| Unigene117685 | Potri.003G183200.1 | 0.7915  | 3.8373  | -2.2774 | Down | 4.97E-06  | 1.08E-05  |

|               |                    |         |          |         |      |           |           |
|---------------|--------------------|---------|----------|---------|------|-----------|-----------|
| Unigene2290   | Potri.003G136300.1 | 1.2074  | 5.8536   | -2.2774 | Down | 6.42E-18  | 2.64E-17  |
| Unigene101725 | Potri.003G132500.1 | 0.9875  | 4.7874   | -2.2774 | Down | 2.22E-14  | 7.87E-14  |
| Unigene36790  | Potri.003G076300.1 | 1.186   | 5.7499   | -2.2774 | Down | 3.39E-13  | 1.14E-12  |
| Unigene98505  | Potri.003G009900.1 | 0.9859  | 4.7797   | -2.2774 | Down | 8.26E-05  | 1.60E-04  |
| Unigene104237 | Potri.002G229500.1 | 0.7278  | 3.5285   | -2.2774 | Down | 1.94E-08  | 5.05E-08  |
| Unigene37895  | Potri.002G195300.2 | 1.4312  | 6.9385   | -2.2774 | Down | 7.99E-11  | 2.39E-10  |
| Unigene103361 | Potri.002G095800.1 | 0.9834  | 4.7677   | -2.2774 | Down | 1.24E-09  | 3.46E-09  |
| Unigene92378  | Potri.001G466200.1 | 26.0781 | 126.4301 | -2.2774 | Down | 4.87E-194 | 2.44E-192 |
| Unigene9108   | Potri.001G405500.1 | 1.3764  | 6.6728   | -2.2774 | Down | 3.08E-07  | 7.36E-07  |
| Unigene30829  | Potri.001G361500.1 | 2.1047  | 10.2038  | -2.2774 | Down | 5.19E-12  | 1.65E-11  |
| Unigene102133 | Potri.001G345300.1 | 2.7758  | 13.4574  | -2.2774 | Down | 7.99E-11  | 2.39E-10  |
| Unigene14444  | Potri.001G233200.1 | 2.7859  | 13.5062  | -2.2774 | Down | 5.19E-12  | 1.65E-11  |
| Unigene38816  | Potri.001G196800.1 | 6.5823  | 31.9118  | -2.2774 | Down | 1.09E-36  | 7.93E-36  |
| Unigene110014 | Potri.001G042000.1 | 1.0173  | 4.9318   | -2.2774 | Down | 8.26E-05  | 1.60E-04  |
| Unigene16376  | Potri.T171900.1    | 0.6766  | 3.2804   | -2.2775 | Down | 4.97E-06  | 1.08E-05  |
| Unigene110758 | Potri.019G130500.2 | 1.3203  | 6.4012   | -2.2775 | Down | 4.97E-06  | 1.08E-05  |
| Unigene4465   | Potri.019G063100.8 | 1.0811  | 5.2415   | -2.2775 | Down | 8.26E-05  | 1.60E-04  |
| Unigene116606 | Potri.019G050700.1 | 0.9181  | 4.4513   | -2.2775 | Down | 4.97E-06  | 1.08E-05  |
| Unigene30147  | Potri.018G127000.1 | 1.3022  | 6.3134   | -2.2775 | Down | 1.24E-09  | 3.46E-09  |
| Unigene119405 | Potri.018G085900.1 | 1.2913  | 6.2605   | -2.2775 | Down | 9.68E-17  | 3.80E-16  |
| Unigene101373 | Potri.016G024200.1 | 1.1337  | 5.4965   | -2.2775 | Down | 3.08E-07  | 7.37E-07  |
| Unigene97305  | Potri.015G092200.1 | 1.0313  | 5        | -2.2775 | Down | 8.26E-05  | 1.60E-04  |
| Unigene115577 | Potri.015G071100.1 | 0.7638  | 3.7031   | -2.2775 | Down | 8.26E-05  | 1.60E-04  |
| Unigene41963  | Potri.010G126900.4 | 0.6891  | 3.341    | -2.2775 | Down | 4.97E-06  | 1.08E-05  |
| Unigene83022  | Potri.006G207800.1 | 0.8413  | 4.0789   | -2.2775 | Down | 8.26E-05  | 1.60E-04  |
| Unigene7      | Potri.006G003200.1 | 1.1676  | 5.6609   | -2.2775 | Down | 5.19E-12  | 1.65E-11  |
| Unigene5544   | Potri.005G071900.4 | 0.8742  | 4.2383   | -2.2775 | Down | 8.26E-05  | 1.60E-04  |
| Unigene91675  | Potri.004G045300.2 | 0.6891  | 3.341    | -2.2775 | Down | 4.97E-06  | 1.08E-05  |
| Unigene101872 | Potri.002G255500.1 | 0.6295  | 3.052    | -2.2775 | Down | 4.97E-06  | 1.08E-05  |
| Unigene38485  | Potri.007G043300.1 | 20.6021 | 99.9095  | -2.2778 | Down | 1.78E-235 | 1.12E-233 |
| Unigene31061  | Potri.018G085200.1 | 9.6115  | 46.6452  | -2.2789 | Down | 2.02E-65  | 2.64E-64  |
| Unigene11304  | Potri.005G208900.1 | 8.2918  | 40.243   | -2.279  | Down | 3.68E-182 | 1.70E-180 |
| Unigene52167  | Potri.010G038700.5 | 10.6734 | 51.808   | -2.2792 | Down | 4.39E-56  | 4.85E-55  |
| Unigene79535  | Potri.015G055400.1 | 13.1011 | 63.5989  | -2.2793 | Down | 2.06E-51  | 2.07E-50  |
| Unigene4105   | Potri.007G096100.3 | 12.2412 | 59.4245  | -2.2793 | Down | 2.06E-51  | 2.07E-50  |
| Unigene40167  | Potri.005G192400.2 | 7.0143  | 34.0507  | -2.2793 | Down | 2.06E-51  | 2.07E-50  |
| Unigene16010  | Potri.015G092100.4 | 8.1877  | 39.7496  | -2.2794 | Down | 4.46E-49  | 4.27E-48  |
| Unigene17130  | Potri.015G066200.2 | 6.957   | 33.7736  | -2.2794 | Down | 3.03E-50  | 2.97E-49  |
| Unigene70591  | Potri.008G107100.1 | 14.7333 | 71.5297  | -2.2795 | Down | 6.57E-48  | 6.15E-47  |

|              |                    |          |          |         |      |           |           |
|--------------|--------------------|----------|----------|---------|------|-----------|-----------|
| Unigene65751 | Potri.002G085500.1 | 6.9589   | 33.7876  | -2.2796 | Down | 1.43E-45  | 1.27E-44  |
| Unigene39196 | Potri.010G055200.2 | 2.656    | 12.8974  | -2.2798 | Down | 4.58E-42  | 3.77E-41  |
| Unigene29604 | Potri.001G021500.2 | 5.644    | 27.407   | -2.2798 | Down | 4.58E-42  | 3.77E-41  |
| Unigene9669  | Potri.005G123200.1 | 19.4992  | 94.6939  | -2.2799 | Down | 4.45E-156 | 1.68E-154 |
| Unigene13639 | Potri.004G222500.3 | 8.8291   | 42.8779  | -2.2799 | Down | 1.05E-191 | 5.20E-190 |
| Unigene46987 | Potri.006G020600.2 | 6.0513   | 29.3908  | -2.28   | Down | 2.18E-37  | 1.61E-36  |
| Unigene87329 | Potri.018G008200.3 | 33.8547  | 164.4522 | -2.2802 | Down | 2.03E-168 | 8.47E-167 |
| Unigene785   | Potri.001G280100.1 | 4.3213   | 20.9911  | -2.2802 | Down | 4.77E-35  | 3.31E-34  |
| Unigene10879 | Potri.018G128000.3 | 5.9394   | 28.8591  | -2.2806 | Down | 2.76E-60  | 3.30E-59  |
| Unigene88475 | Potri.008G114900.1 | 39.4214  | 191.5415 | -2.2806 | Down | 3.11E-208 | 1.69E-206 |
| Unigene39644 | Potri.001G285600.1 | 2.3114   | 11.2304  | -2.2806 | Down | 1.88E-61  | 2.29E-60  |
| Unigene4740  | Potri.005G071900.4 | 10.751   | 52.2408  | -2.2807 | Down | 4.06E-59  | 4.75E-58  |
| Unigene20329 | Potri.008G049500.1 | 5.7091   | 27.7469  | -2.281  | Down | 5.08E-28  | 2.91E-27  |
| Unigene22125 | Potri.015G141700.1 | 2.5605   | 12.4475  | -2.2814 | Down | 7.82E-98  | 1.63E-96  |
| Unigene196   | Potri.006G180800.1 | 4.3496   | 21.1449  | -2.2814 | Down | 1.19E-168 | 4.99E-167 |
| Unigene4539  | Potri.013G113500.1 | 4.8087   | 23.383   | -2.2817 | Down | 2.51E-23  | 1.24E-22  |
| Unigene17819 | Potri.010G036200.1 | 6.6671   | 32.4199  | -2.2817 | Down | 4.20E-45  | 3.69E-44  |
| Unigene53372 | Potri.006G229400.1 | 7.1225   | 34.632   | -2.2817 | Down | 2.85E-46  | 2.57E-45  |
| Unigene37294 | Potri.007G051900.1 | 20.5217  | 99.7908  | -2.2818 | Down | 1.65E-88  | 3.03E-87  |
| Unigene37836 | Potri.006G100600.1 | 21.8077  | 106.0479 | -2.2818 | Down | 5.09E-109 | 1.21E-107 |
| Unigene22443 | Potri.004G173900.1 | 37.1029  | 180.445  | -2.282  | Down | 0         | 0         |
| Unigene37702 | Potri.001G320500.1 | 52.149   | 253.6217 | -2.282  | Down | 0         | 0         |
| Unigene25149 | Potri.010G034300.1 | 16.1552  | 78.5787  | -2.2821 | Down | 2.28E-121 | 6.24E-120 |
| Unigene2456  | Potri.001G269900.2 | 1.7435   | 8.481    | -2.2822 | Down | 5.61E-21  | 2.58E-20  |
| Unigene70377 | Potri.014G054200.2 | 1.3987   | 6.8041   | -2.2823 | Down | 5.61E-21  | 2.58E-20  |
| Unigene48325 | Potri.009G122800.1 | 4.3189   | 21.0091  | -2.2823 | Down | 5.61E-21  | 2.58E-20  |
| Unigene6732  | Potri.010G170900.1 | 2.0197   | 9.8269   | -2.2826 | Down | 4.34E-38  | 3.25E-37  |
| Unigene34916 | Potri.008G105800.2 | 2.3657   | 11.5118  | -2.2828 | Down | 6.42E-37  | 4.68E-36  |
| Unigene17683 | Potri.002G079100.1 | 1.9884   | 9.677    | -2.283  | Down | 1.27E-18  | 5.35E-18  |
| Unigene14866 | Potri.001G370500.1 | 3.6667   | 17.845   | -2.283  | Down | 1.27E-18  | 5.35E-18  |
| Unigene42546 | Potri.004G030500.1 | 2.416    | 11.7597  | -2.2832 | Down | 2.23E-83  | 3.83E-82  |
| Unigene29748 | Potri.012G034300.1 | 11.4834  | 55.9058  | -2.2834 | Down | 7.02E-80  | 1.15E-78  |
| Unigene82457 | Potri.001G294400.1 | 11.5757  | 56.3517  | -2.2834 | Down | 2.62E-49  | 2.52E-48  |
| Unigene12572 | Potri.009G010000.1 | 9.5313   | 46.4111  | -2.2837 | Down | 2.21E-76  | 3.44E-75  |
| Unigene86453 | Potri.005G063300.6 | 148.3308 | 722.2657 | -2.2837 | Down | 0         | 0         |
| Unigene12290 | Potri.019G043300.7 | 4.0899   | 19.9164  | -2.2838 | Down | 4.58E-31  | 2.86E-30  |
| Unigene25872 | Potri.007G097100.1 | 48.864   | 237.9526 | -2.2838 | Down | 5.84E-178 | 2.62E-176 |
| Unigene33262 | Potri.002G167200.1 | 9.7329   | 47.406   | -2.2841 | Down | 6.29E-100 | 1.35E-98  |
| Unigene1770  | Potri.004G034000.1 | 16.4012  | 79.8954  | -2.2843 | Down | 4.10E-111 | 1.00E-109 |

|               |                    |         |          |         |      |           |           |
|---------------|--------------------|---------|----------|---------|------|-----------|-----------|
| Unigene116633 | Potri.T168100.1    | 5.2631  | 25.6396  | -2.2844 | Down | 1.01E-28  | 5.91E-28  |
| Unigene113532 | Potri.018G067200.1 | 6.7023  | 32.6505  | -2.2844 | Down | 1.01E-28  | 5.91E-28  |
| Unigene39950  | Potri.017G058800.1 | 1.6156  | 7.8705   | -2.2844 | Down | 4.36E-15  | 1.60E-14  |
| Unigene37787  | Potri.013G041200.1 | 1.1577  | 5.64     | -2.2844 | Down | 4.36E-15  | 1.60E-14  |
| Unigene97830  | Potri.008G021400.2 | 3.0749  | 14.9794  | -2.2844 | Down | 4.36E-15  | 1.60E-14  |
| Unigene89194  | Potri.007G003100.1 | 2.4511  | 11.9407  | -2.2844 | Down | 4.36E-15  | 1.60E-14  |
| Unigene4230   | Potri.005G070700.5 | 11.862  | 57.7929  | -2.2845 | Down | 1.11E-54  | 1.20E-53  |
| Unigene53610  | Potri.006G046500.2 | 10.8235 | 52.7431  | -2.2848 | Down | 5.86E-40  | 4.59E-39  |
| Unigene20153  | Potri.017G089800.8 | 2.117   | 10.3178  | -2.285  | Down | 6.63E-14  | 2.30E-13  |
| Unigene116286 | Potri.014G106500.2 | 2.4946  | 12.1579  | -2.285  | Down | 6.63E-14  | 2.30E-13  |
| Unigene20847  | Potri.012G104000.2 | 4.4379  | 21.6294  | -2.285  | Down | 2.23E-26  | 1.22E-25  |
| Unigene94668  | Potri.006G051000.1 | 2.4658  | 12.0176  | -2.285  | Down | 8.65E-39  | 6.59E-38  |
| Unigene30320  | Potri.001G241600.1 | 3.096   | 15.0893  | -2.285  | Down | 6.63E-14  | 2.30E-13  |
| Unigene4878   | Potri.002G018600.1 | 2.539   | 12.3747  | -2.2851 | Down | 2.23E-26  | 1.22E-25  |
| Unigene8323   | Potri.015G086800.2 | 17.7534 | 86.5384  | -2.2852 | Down | 2.21E-182 | 1.03E-180 |
| Unigene84396  | Potri.002G146300.1 | 85.1986 | 415.2953 | -2.2852 | Down | 0         | 0         |
| Unigene48537  | Potri.010G231200.1 | 9.668   | 47.1292  | -2.2853 | Down | 3.95E-97  | 8.14E-96  |
| Unigene23698  | Potri.006G057300.4 | 1.8262  | 8.9027   | -2.2854 | Down | 3.33E-25  | 1.75E-24  |
| Unigene45598  | Potri.012G134300.4 | 7.1714  | 34.9624  | -2.2855 | Down | 3.76E-107 | 8.75E-106 |
| Unigene42157  | Potri.010G192300.1 | 7.6161  | 37.1345  | -2.2856 | Down | 1.13E-47  | 1.06E-46  |
| Unigene7837   | Potri.016G127700.1 | 2.4546  | 11.9683  | -2.2857 | Down | 7.00E-59  | 8.16E-58  |
| Unigene109300 | Potri.001G145300.2 | 6.6544  | 32.45    | -2.2858 | Down | 4.97E-24  | 2.52E-23  |
| Unigene2606   | Potri.001G455100.1 | 5.5775  | 27.2015  | -2.286  | Down | 9.50E-68  | 1.29E-66  |
| Unigene46027  | Potri.012G088500.2 | 12.3774 | 60.3679  | -2.2861 | Down | 2.46E-45  | 2.18E-44  |
| Unigene10096  | Potri.009G083900.1 | 6.5542  | 31.9684  | -2.2862 | Down | 4.14E-34  | 2.81E-33  |
| Unigene79238  | Potri.003G170700.1 | 10.8339 | 52.8577  | -2.2866 | Down | 5.36E-43  | 4.50E-42  |
| Unigene23775  | Potri.001G141100.1 | 5.3942  | 26.321   | -2.2867 | Down | 3.05E-133 | 9.37E-132 |
| Unigene50414  | Potri.008G204700.3 | 2.902   | 14.1614  | -2.2868 | Down | 1.11E-21  | 5.22E-21  |
| Unigene105960 | Potri.008G037300.1 | 1.4746  | 7.196    | -2.2869 | Down | 1.11E-21  | 5.22E-21  |
| Unigene36180  | Potri.010G129300.1 | 12.1497 | 59.2961  | -2.287  | Down | 9.52E-61  | 1.15E-59  |
| Unigene6975   | Potri.016G116200.3 | 7.3188  | 35.7202  | -2.2871 | Down | 1.04E-50  | 1.03E-49  |
| Unigene1751   | Potri.003G005500.1 | 2.4942  | 12.1736  | -2.2871 | Down | 1.17E-40  | 9.30E-40  |
| Unigene18628  | Potri.007G015300.1 | 8.194   | 40.0013  | -2.2874 | Down | 2.06E-58  | 2.38E-57  |
| Unigene53118  | Potri.004G225800.5 | 5.2814  | 25.7825  | -2.2874 | Down | 1.66E-20  | 7.53E-20  |
| Unigene93368  | Potri.T081600.1    | 15.6947 | 76.6207  | -2.2875 | Down | 8.62E-143 | 2.88E-141 |
| Unigene94906  | Potri.011G145900.1 | 0.8995  | 4.3932   | -2.2881 | Down | 2.40E-10  | 6.98E-10  |
| Unigene118222 | Potri.007G032000.1 | 4.0251  | 19.6589  | -2.2881 | Down | 2.98E-28  | 1.72E-27  |
| Unigene104113 | Potri.003G107500.1 | 1.5081  | 7.3655   | -2.2881 | Down | 2.40E-10  | 6.98E-10  |
| Unigene117568 | Potri.001G156000.3 | 1.5121  | 7.3854   | -2.2881 | Down | 2.40E-10  | 6.98E-10  |

|               |                    |         |          |         |      |           |           |
|---------------|--------------------|---------|----------|---------|------|-----------|-----------|
| Unigene26537  | Potri.017G050400.1 | 3.9311  | 19.2062  | -2.2886 | Down | 4.43E-27  | 2.47E-26  |
| Unigene52991  | Potri.009G159800.1 | 3.151   | 15.3951  | -2.2886 | Down | 4.43E-27  | 2.47E-26  |
| Unigene8753   | Potri.018G138200.2 | 10.3405 | 50.5299  | -2.2888 | Down | 2.08E-51  | 2.09E-50  |
| Unigene27314  | Potri.015G108600.2 | 3.9862  | 19.4791  | -2.2888 | Down | 3.76E-18  | 1.56E-17  |
| Unigene88771  | Potri.001G472600.8 | 17.0042 | 83.0888  | -2.2888 | Down | 2.13E-93  | 4.18E-92  |
| Unigene23540  | Potri.005G144800.1 | 10.9265 | 53.3968  | -2.2889 | Down | 4.47E-166 | 1.84E-164 |
| Unigene72570  | Potri.003G028000.1 | 5.0453  | 24.6547  | -2.2889 | Down | 3.76E-18  | 1.56E-17  |
| Unigene971    | Potri.001G070400.1 | 15.0234 | 73.4153  | -2.2889 | Down | 1.65E-224 | 9.80E-223 |
| Unigene11026  | Potri.016G031800.1 | 3.7856  | 18.5027  | -2.2891 | Down | 1.90E-106 | 4.38E-105 |
| Unigene22329  | Potri.010G054800.1 | 2.0527  | 10.0328  | -2.2891 | Down | 6.60E-26  | 3.55E-25  |
| Unigene10711  | Potri.014G076500.1 | 4.638   | 22.6699  | -2.2892 | Down | 6.04E-58  | 6.92E-57  |
| Unigene15241  | Potri.011G057200.1 | 13.2219 | 64.6262  | -2.2892 | Down | 6.04E-58  | 6.92E-57  |
| Unigene106897 | Potri.001G249000.1 | 0.73    | 3.5685   | -2.2893 | Down | 1.22E-33  | 8.18E-33  |
| Unigene28225  | Potri.001G050700.4 | 37.5211 | 183.4196 | -2.2894 | Down | 5.21E-302 | 4.65E-300 |
| Unigene776    | Potri.001G455800.1 | 3.3068  | 16.166   | -2.2895 | Down | 8.88E-57  | 9.95E-56  |
| Unigene9580   | Potri.016G010600.1 | 1.6606  | 8.1196   | -2.2897 | Down | 5.67E-17  | 2.25E-16  |
| Unigene27858  | Potri.011G109600.1 | 2.5027  | 12.237   | -2.2897 | Down | 1.81E-32  | 1.18E-31  |
| Unigene117662 | Potri.003G107500.1 | 1.2931  | 6.3225   | -2.2897 | Down | 3.74E-09  | 1.01E-08  |
| Unigene118561 | Potri.003G038400.9 | 1.0657  | 5.2108   | -2.2897 | Down | 3.74E-09  | 1.01E-08  |
| Unigene105015 | Potri.008G011800.1 | 1.6412  | 8.025    | -2.2898 | Down | 5.18E-71  | 7.39E-70  |
| Unigene8543   | Potri.006G106400.1 | 0.8946  | 4.3744   | -2.2898 | Down | 3.74E-09  | 1.01E-08  |
| Unigene27568  | Potri.006G110700.1 | 10.3312 | 50.5206  | -2.2899 | Down | 6.25E-93  | 1.22E-91  |
| Unigene43308  | Potri.008G028800.1 | 6.3537  | 31.0746  | -2.2901 | Down | 4.52E-84  | 7.83E-83  |
| Unigene51100  | Potri.010G120700.2 | 6.4884  | 31.737   | -2.2902 | Down | 1.66E-112 | 4.13E-111 |
| Unigene43600  | Potri.002G249300.1 | 22.7509 | 111.279  | -2.2902 | Down | 0         | 0         |
| Unigene24816  | Potri.016G064300.2 | 0.7744  | 3.7891   | -2.2907 | Down | 8.57E-16  | 3.23E-15  |
| Unigene105118 | Potri.012G139800.1 | 1.1551  | 5.6519   | -2.2907 | Down | 8.57E-16  | 3.23E-15  |
| Unigene29686  | Potri.002G242200.3 | 2.3072  | 11.2891  | -2.2907 | Down | 8.57E-16  | 3.23E-15  |
| Unigene33053  | Potri.006G246000.1 | 1.5121  | 7.399    | -2.2908 | Down | 3.98E-30  | 2.43E-29  |
| Unigene20136  | Potri.009G137400.2 | 17.1032 | 83.7028  | -2.291  | Down | 3.33E-113 | 8.33E-112 |
| Unigene1305   | Potri.013G157800.4 | 1.2595  | 6.1644   | -2.2911 | Down | 3.14E-43  | 2.65E-42  |
| Unigene109524 | Potri.004G001200.1 | 6.072   | 29.7184  | -2.2911 | Down | 2.20E-22  | 1.06E-21  |
| Unigene27666  | Potri.004G038300.1 | 2.1288  | 10.4202  | -2.2913 | Down | 5.92E-29  | 3.49E-28  |
| Unigene16628  | Potri.013G078200.1 | 9.2232  | 45.1536  | -2.2915 | Down | 4.64E-42  | 3.82E-41  |
| Unigene45107  | Potri.008G054400.1 | 3.0791  | 15.0747  | -2.2915 | Down | 1.33E-48  | 1.26E-47  |
| Unigene89110  | Potri.006G267500.1 | 7.2884  | 35.6817  | -2.2915 | Down | 4.64E-42  | 3.82E-41  |
| Unigene61424  | Potri.004G196300.1 | 3.1469  | 15.406   | -2.2915 | Down | 4.64E-42  | 3.82E-41  |
| Unigene118512 | Potri.015G090300.2 | 5.4828  | 26.8498  | -2.2919 | Down | 6.85E-41  | 5.49E-40  |
| Unigene30636  | Potri.014G114100.1 | 4.2739  | 20.9298  | -2.2919 | Down | 6.85E-41  | 5.49E-40  |

|               |                    |         |          |         |      |           |           |
|---------------|--------------------|---------|----------|---------|------|-----------|-----------|
| Unigene117790 | Potri.014G018200.1 | 1.0685  | 5.2324   | -2.2919 | Down | 5.88E-08  | 1.48E-07  |
| Unigene4220   | Potri.012G139900.1 | 1.5425  | 7.5536   | -2.2919 | Down | 5.88E-08  | 1.48E-07  |
| Unigene27434  | Potri.009G124600.2 | 1.2862  | 6.2986   | -2.2919 | Down | 5.88E-08  | 1.48E-07  |
| Unigene119128 | Potri.006G039000.3 | 0.6978  | 3.4171   | -2.2919 | Down | 5.88E-08  | 1.48E-07  |
| Unigene18382  | Potri.004G157300.1 | 4.2338  | 20.7335  | -2.2919 | Down | 1.41E-73  | 2.10E-72  |
| Unigene118740 | Potri.004G019700.1 | 0.853   | 4.1773   | -2.292  | Down | 5.88E-08  | 1.48E-07  |
| Unigene10255  | Potri.013G028700.1 | 8.8507  | 43.3637  | -2.2926 | Down | 1.22E-51  | 1.24E-50  |
| Unigene8390   | Potri.016G116300.3 | 5.36    | 26.2628  | -2.2927 | Down | 4.25E-45  | 3.73E-44  |
| Unigene17714  | Potri.002G020700.1 | 5.9297  | 29.057   | -2.2929 | Down | 1.49E-38  | 1.13E-37  |
| Unigene42671  | Potri.003G189200.2 | 5.0121  | 24.5632  | -2.293  | Down | 1.65E-129 | 4.87E-128 |
| Unigene9870   | Potri.004G044900.1 | 0.841   | 4.1227   | -2.2934 | Down | 1.98E-13  | 6.73E-13  |
| Unigene4922   | Potri.001G352700.1 | 4.9078  | 24.0582  | -2.2934 | Down | 1.95E-25  | 1.03E-24  |
| Unigene44788  | Potri.001G020200.1 | 2.1429  | 10.5064  | -2.2936 | Down | 9.24E-43  | 7.72E-42  |
| Unigene52583  | Potri.011G144400.3 | 4.0665  | 19.9415  | -2.2939 | Down | 7.41E-19  | 3.16E-18  |
| Unigene107664 | Potri.015G002300.1 | 12.3716 | 60.6757  | -2.2941 | Down | 1.36E-41  | 1.11E-40  |
| Unigene34667  | Potri.019G084800.1 | 9.3142  | 45.6881  | -2.2943 | Down | 6.63E-131 | 1.99E-129 |
| Unigene85095  | Potri.008G135900.1 | 52.2194 | 256.1983 | -2.2946 | Down | 3.66E-239 | 2.37E-237 |
| Unigene35397  | Potri.003G194500.1 | 8.7211  | 42.7871  | -2.2946 | Down | 2.01E-40  | 1.60E-39  |
| Unigene5586   | Potri.001G331400.1 | 8.7526  | 42.9416  | -2.2946 | Down | 2.01E-40  | 1.60E-39  |
| Unigene102732 | Potri.009G101700.1 | 0.6965  | 3.4182   | -2.295  | Down | 9.40E-07  | 2.17E-06  |
| Unigene38602  | Potri.001G082100.1 | 41.9228 | 205.7381 | -2.295  | Down | 0         | 0         |
| Unigene26526  | Potri.013G034700.1 | 0.7936  | 3.895    | -2.2951 | Down | 9.40E-07  | 2.17E-06  |
| Unigene93130  | Potri.013G016900.5 | 8.1267  | 39.8859  | -2.2951 | Down | 1.78E-71  | 2.56E-70  |
| Unigene111482 | Potri.010G195900.2 | 1.4408  | 7.0712   | -2.2951 | Down | 9.40E-07  | 2.17E-06  |
| Unigene3649   | Potri.006G077800.1 | 6.3339  | 31.0867  | -2.2951 | Down | 2.98E-39  | 2.29E-38  |
| Unigene104892 | Potri.005G053500.1 | 0.8031  | 3.9416   | -2.2951 | Down | 9.40E-07  | 2.17E-06  |
| Unigene106235 | Potri.019G104600.1 | 2.0469  | 10.0463  | -2.2952 | Down | 3.03E-12  | 9.73E-12  |
| Unigene110539 | Potri.016G121100.1 | 1.4986  | 7.3553   | -2.2952 | Down | 9.40E-07  | 2.17E-06  |
| Unigene4113   | Potri.008G009100.1 | 3.5839  | 17.59    | -2.2952 | Down | 1.12E-17  | 4.55E-17  |
| Unigene25496  | Potri.002G172500.2 | 3.9034  | 19.1581  | -2.2952 | Down | 1.12E-17  | 4.55E-17  |
| Unigene32175  | Potri.005G112000.2 | 9.6703  | 47.4719  | -2.2954 | Down | 6.40E-202 | 3.36E-200 |
| Unigene53956  | Potri.016G006500.1 | 6.431   | 31.5741  | -2.2956 | Down | 1.84E-43  | 1.56E-42  |
| Unigene43989  | Potri.003G034300.1 | 8.8808  | 43.6023  | -2.2956 | Down | 3.11E-85  | 5.49E-84  |
| Unigene44952  | Potri.010G112800.1 | 6.802   | 33.3976  | -2.2957 | Down | 1.66E-74  | 2.50E-73  |
| Unigene42262  | Potri.001G252500.2 | 30.8303 | 151.3752 | -2.2957 | Down | 1.57E-183 | 7.37E-182 |
| Unigene63996  | Potri.009G137200.2 | 9.4745  | 46.5246  | -2.2959 | Down | 2.08E-58  | 2.40E-57  |
| Unigene36340  | Potri.003G174800.2 | 12.1114 | 59.4741  | -2.2959 | Down | 4.56E-84  | 7.90E-83  |
| Unigene21877  | Potri.015G013700.2 | 2.86    | 14.0456  | -2.296  | Down | 2.43E-73  | 3.60E-72  |
| Unigene36279  | Potri.006G189300.1 | 5.2074  | 25.5724  | -2.296  | Down | 2.60E-27  | 1.46E-26  |

|               |                     |         |          |         |      |           |           |
|---------------|---------------------|---------|----------|---------|------|-----------|-----------|
| Unigene32993  | Potri.003G131300.5  | 9.5129  | 46.7159  | -2.296  | Down | 5.69E-130 | 1.69E-128 |
| Unigene10871  | Potri.003G213200.2  | 10.0383 | 49.3001  | -2.2961 | Down | 4.90E-180 | 2.23E-178 |
| Unigene46061  | Potri.016G038100.10 | 6.0104  | 29.5199  | -2.2962 | Down | 6.50E-22  | 3.08E-21  |
| Unigene85942  | Potri.003G201200.2  | 8.5979  | 42.2285  | -2.2962 | Down | 2.72E-42  | 2.25E-41  |
| Unigene32898  | Potri.014G086500.1  | 10.2955 | 50.5723  | -2.2963 | Down | 1.51E-142 | 5.03E-141 |
| Unigene2567   | Potri.005G098300.1  | 2.6013  | 12.7776  | -2.2963 | Down | 6.50E-37  | 4.74E-36  |
| Unigene48386  | Potri.017G138600.1  | 7.0093  | 34.4316  | -2.2964 | Down | 7.16E-52  | 7.27E-51  |
| Unigene83998  | Potri.013G056600.3  | 11.4349 | 56.1713  | -2.2964 | Down | 7.16E-52  | 7.27E-51  |
| Unigene93867  | Potri.010G093300.1  | 64.0065 | 314.4401 | -2.2965 | Down | 0         | 0         |
| Unigene31641  | Potri.009G014900.3  | 1.5138  | 7.4369   | -2.2965 | Down | 1.68E-16  | 6.55E-16  |
| Unigene43403  | Potri.006G189300.1  | 3.4665  | 17.0302  | -2.2965 | Down | 1.69E-46  | 1.53E-45  |
| Unigene46632  | Potri.001G369500.1  | 2.1486  | 10.5556  | -2.2965 | Down | 1.68E-16  | 6.55E-16  |
| Unigene6626   | Potri.008G196400.1  | 1.9714  | 9.6852   | -2.2966 | Down | 1.68E-16  | 6.55E-16  |
| Unigene6707   | Potri.005G072100.1  | 1.9798  | 9.7264   | -2.2966 | Down | 1.68E-16  | 6.55E-16  |
| Unigene1380   | Potri.018G089500.1  | 6.6394  | 32.625   | -2.2969 | Down | 3.31E-75  | 5.06E-74  |
| Unigene9044   | Potri.008G009400.1  | 11.2127 | 55.1006  | -2.2969 | Down | 2.82E-60  | 3.37E-59  |
| Unigene34914  | Potri.005G235900.5  | 11.586  | 56.9358  | -2.297  | Down | 2.53E-94  | 5.02E-93  |
| Unigene24095  | Potri.014G180100.3  | 6.4557  | 31.7274  | -2.2971 | Down | 1.61E-98  | 3.40E-97  |
| Unigene36047  | Potri.019G014300.2  | 5.8509  | 28.76    | -2.2973 | Down | 9.73E-21  | 4.44E-20  |
| Unigene104972 | Potri.006G262600.1  | 1.4243  | 7.0012   | -2.2973 | Down | 4.66E-11  | 1.41E-10  |
| Unigene56716  | Potri.004G040400.1  | 7.429   | 36.5168  | -2.2973 | Down | 2.33E-30  | 1.43E-29  |
| Unigene39427  | Potri.002G263700.1  | 1.9871  | 9.7675   | -2.2973 | Down | 2.33E-30  | 1.43E-29  |
| Unigene29099  | Potri.016G105900.2  | 2.7134  | 13.3402  | -2.2976 | Down | 3.67E-44  | 3.16E-43  |
| Unigene73044  | Potri.009G125000.1  | 12.6711 | 62.2967  | -2.2976 | Down | 3.67E-44  | 3.16E-43  |
| Unigene32514  | Potri.004G145200.2  | 2.2059  | 10.8457  | -2.2977 | Down | 1.42E-34  | 9.75E-34  |
| Unigene4888   | Potri.001G079100.1  | 3.799   | 18.6787  | -2.2977 | Down | 1.42E-34  | 9.75E-34  |
| Unigene53556  | Potri.006G034900.1  | 6.8617  | 33.7404  | -2.2978 | Down | 5.76E-25  | 3.01E-24  |
| Unigene13940  | Potri.016G058300.1  | 25.2955 | 124.3906 | -2.2979 | Down | 0         | 0         |
| Unigene11814  | Potri.008G161300.2  | 2.4064  | 11.8358  | -2.2982 | Down | 3.47E-29  | 2.06E-28  |
| Unigene8010   | Potri.002G130700.1  | 10.4621 | 51.4567  | -2.2982 | Down | 4.73E-98  | 9.87E-97  |
| Unigene41595  | Potri.003G140900.1  | 9.6014  | 47.2257  | -2.2983 | Down | 5.41E-116 | 1.40E-114 |
| Unigene24994  | Potri.003G073700.4  | 8.521   | 41.9173  | -2.2985 | Down | 2.11E-33  | 1.40E-32  |
| Unigene86818  | Potri.001G146700.1  | 31.2049 | 153.518  | -2.2986 | Down | 6.89E-155 | 2.57E-153 |
| Unigene32321  | Potri.010G028300.2  | 2.2202  | 10.9234  | -2.2987 | Down | 1.32E-55  | 1.44E-54  |
| Unigene13150  | Potri.001G201600.1  | 3.0378  | 14.9473  | -2.2988 | Down | 4.75E-122 | 1.31E-120 |
| Unigene63452  | Potri.001G206700.1  | 4.6157  | 22.7134  | -2.2989 | Down | 8.60E-24  | 4.33E-23  |
| Unigene35560  | Potri.015G010200.1  | 13.5077 | 66.4792  | -2.2991 | Down | 1.94E-54  | 2.07E-53  |
| Unigene29144  | Potri.009G074100.1  | 10.8353 | 53.3444  | -2.2996 | Down | 1.29E-100 | 2.79E-99  |
| Unigene41201  | Potri.T146500.1     | 4.9531  | 24.3943  | -2.3001 | Down | 4.64E-31  | 2.90E-30  |

|               |                    |         |         |         |      |           |           |
|---------------|--------------------|---------|---------|---------|------|-----------|-----------|
| Unigene9390   | Potri.T143600.1    | 0.9259  | 4.56    | -2.3001 | Down | 7.22E-10  | 2.05E-09  |
| Unigene15218  | Potri.018G114400.1 | 0.9292  | 4.5763  | -2.3001 | Down | 1.53E-05  | 3.19E-05  |
| Unigene97958  | Potri.016G127300.1 | 1.1579  | 5.7026  | -2.3001 | Down | 7.22E-10  | 2.05E-09  |
| Unigene35774  | Potri.015G028400.1 | 1.1017  | 5.4259  | -2.3001 | Down | 1.53E-05  | 3.18E-05  |
| Unigene31225  | Potri.014G153700.1 | 6.3905  | 31.4737 | -2.3001 | Down | 4.64E-31  | 2.90E-30  |
| Unigene56939  | Potri.013G127200.3 | 1.0444  | 5.1437  | -2.3001 | Down | 1.53E-05  | 3.18E-05  |
| Unigene41955  | Potri.006G266900.3 | 2.6241  | 12.9239 | -2.3001 | Down | 2.20E-18  | 9.21E-18  |
| Unigene117742 | Potri.005G003200.1 | 0.6871  | 3.384   | -2.3001 | Down | 1.53E-05  | 3.19E-05  |
| Unigene43357  | Potri.002G231000.1 | 7.2387  | 35.6511 | -2.3001 | Down | 3.97E-182 | 1.84E-180 |
| Unigene15130  | Potri.001G281100.1 | 12.0105 | 59.1526 | -2.3001 | Down | 2.77E-98  | 5.81E-97  |
| Unigene50134  | Potri.001G234300.1 | 1.1206  | 5.519   | -2.3001 | Down | 1.53E-05  | 3.18E-05  |
| Unigene117297 | Potri.001G081900.1 | 0.7355  | 3.6223  | -2.3001 | Down | 1.53E-05  | 3.19E-05  |
| Unigene21010  | Potri.017G149700.1 | 1.2172  | 5.995   | -2.3002 | Down | 7.22E-10  | 2.05E-09  |
| Unigene97213  | Potri.015G025300.2 | 1.0856  | 5.3469  | -2.3002 | Down | 7.22E-10  | 2.05E-09  |
| Unigene26835  | Potri.013G005900.1 | 5.0628  | 24.9349 | -2.3002 | Down | 4.64E-31  | 2.90E-30  |
| Unigene21182  | Potri.010G074800.8 | 1.4425  | 7.1046  | -2.3002 | Down | 3.87E-14  | 1.36E-13  |
| Unigene62406  | Potri.007G130900.2 | 5.8183  | 28.6557 | -2.3002 | Down | 2.83E-35  | 1.97E-34  |
| Unigene117826 | Potri.004G223900.1 | 0.6764  | 3.3314  | -2.3002 | Down | 1.53E-05  | 3.19E-05  |
| Unigene103432 | Potri.002G160800.1 | 1.1254  | 5.5428  | -2.3002 | Down | 1.53E-05  | 3.19E-05  |
| Unigene3482   | Potri.002G008700.1 | 0.8096  | 3.9874  | -2.3002 | Down | 7.22E-10  | 2.05E-09  |
| Unigene1518   | Potri.006G237100.1 | 19.1501 | 94.3372 | -2.3005 | Down | 4.75E-254 | 3.34E-252 |
| Unigene47315  | Potri.005G216200.2 | 7.406   | 36.4858 | -2.3006 | Down | 9.68E-68  | 1.31E-66  |
| Unigene10015  | Potri.001G124000.1 | 6.1791  | 30.4415 | -2.3006 | Down | 9.68E-68  | 1.31E-66  |
| Unigene85740  | Potri.007G023400.1 | 11.3299 | 55.8204 | -2.3007 | Down | 3.87E-55  | 4.20E-54  |
| Unigene42405  | Potri.017G101400.1 | 6.5835  | 32.4412 | -2.3009 | Down | 1.09E-184 | 5.17E-183 |
| Unigene39615  | Potri.018G020200.4 | 4.3817  | 21.5973 | -2.3013 | Down | 9.10E-50  | 8.84E-49  |
| Unigene33588  | Potri.014G110500.1 | 1.3713  | 6.7591  | -2.3013 | Down | 1.14E-25  | 6.09E-25  |
| Unigene43469  | Potri.016G121100.1 | 25.7253 | 126.814 | -2.3015 | Down | 0         | 0         |
| Unigene42950  | Potri.008G155400.1 | 2.7076  | 13.3484 | -2.3016 | Down | 7.76E-77  | 1.22E-75  |
| Unigene18318  | Potri.014G177400.1 | 5.6719  | 27.9637 | -2.3017 | Down | 1.86E-92  | 3.60E-91  |
| Unigene9802   | Potri.008G118600.1 | 1.4325  | 7.0636  | -2.3019 | Down | 3.31E-17  | 1.32E-16  |
| Unigene13000  | Potri.010G244200.2 | 2.4252  | 11.9599 | -2.302  | Down | 2.15E-44  | 1.86E-43  |
| Unigene60502  | Potri.016G020100.1 | 6.3821  | 31.4759 | -2.3021 | Down | 1.02E-28  | 5.98E-28  |
| Unigene56     | Potri.007G046700.3 | 3.377   | 16.6542 | -2.3021 | Down | 6.01E-215 | 3.39E-213 |
| Unigene11561  | Potri.005G228500.1 | 2.8823  | 14.2155 | -2.3022 | Down | 6.73E-83  | 1.15E-81  |
| Unigene47486  | Potri.003G199700.1 | 29.6155 | 146.081 | -2.3023 | Down | 5.82E-113 | 1.45E-111 |
| Unigene2534   | Potri.008G170300.3 | 2.9777  | 14.6895 | -2.3025 | Down | 1.97E-47  | 1.83E-46  |
| Unigene48695  | Potri.008G140700.1 | 5.4515  | 26.8932 | -2.3025 | Down | 1.70E-24  | 8.77E-24  |
| Unigene51736  | Potri.003G093000.1 | 1.9     | 9.373   | -2.3025 | Down | 5.91E-13  | 1.96E-12  |



|               |                    |         |          |         |      |           |           |
|---------------|--------------------|---------|----------|---------|------|-----------|-----------|
| Unigene20723  | Potri.003G003400.2 | 1.652   | 8.1494   | -2.3025 | Down | 5.91E-13  | 1.96E-12  |
| Unigene32079  | Potri.015G097200.1 | 39.7679 | 196.1984 | -2.3026 | Down | 4.01E-263 | 2.97E-261 |
| Unigene21590  | Potri.012G114400.1 | 6.5372  | 32.2507  | -2.3026 | Down | 1.14E-191 | 5.63E-190 |
| Unigene98824  | Potri.004G074500.1 | 1.0437  | 5.1489   | -2.3026 | Down | 5.91E-13  | 1.96E-12  |
| Unigene817    | Potri.008G005500.1 | 4.1401  | 20.4261  | -2.3027 | Down | 4.17E-66  | 5.52E-65  |
| Unigene24890  | Potri.003G071000.1 | 5.4981  | 27.1267  | -2.3027 | Down | 1.14E-54  | 1.22E-53  |
| Unigene7411   | Potri.001G396500.1 | 6.0425  | 29.8174  | -2.3029 | Down | 1.81E-50  | 1.79E-49  |
| Unigene12040  | Potri.T063900.1    | 2.2436  | 11.0786  | -2.3039 | Down | 5.01E-16  | 1.91E-15  |
| Unigene44886  | Potri.014G194500.2 | 0.9423  | 4.653    | -2.3039 | Down | 1.13E-08  | 2.97E-08  |
| Unigene87126  | Potri.005G083200.8 | 43.1763 | 213.2013 | -2.3039 | Down | 1.95E-218 | 1.13E-216 |
| Unigene116652 | Potri.002G139000.1 | 1.3688  | 6.759    | -2.3039 | Down | 1.13E-08  | 2.97E-08  |
| Unigene5132   | Potri.016G025600.1 | 0.973   | 4.8048   | -2.304  | Down | 1.13E-08  | 2.97E-08  |
| Unigene33533  | Potri.011G081200.4 | 19.2309 | 94.9987  | -2.3045 | Down | 5.37E-221 | 3.14E-219 |
| Unigene119540 | Potri.008G199800.1 | 1.3618  | 6.7274   | -2.3045 | Down | 2.26E-26  | 1.23E-25  |
| Unigene73539  | Potri.001G235500.3 | 22.6272 | 111.7949 | -2.3047 | Down | 6.20E-79  | 1.00E-77  |
| Unigene8401   | Potri.006G068000.1 | 2.3187  | 11.4569  | -2.3048 | Down | 1.12E-36  | 8.11E-36  |
| Unigene44061  | Potri.006G038400.2 | 2.874   | 14.2028  | -2.305  | Down | 2.03E-29  | 1.21E-28  |
| Unigene118802 | Potri.016G003000.1 | 1.2836  | 6.345    | -2.3054 | Down | 9.06E-12  | 2.84E-11  |
| Unigene20659  | Potri.011G132800.1 | 2.2566  | 11.1546  | -2.3054 | Down | 9.06E-12  | 2.84E-11  |
| Unigene113867 | Potri.009G150100.1 | 2.4295  | 12.0094  | -2.3054 | Down | 9.06E-12  | 2.84E-11  |
| Unigene41957  | Potri.005G082500.1 | 1.6643  | 8.2269   | -2.3054 | Down | 9.06E-12  | 2.84E-11  |
| Unigene107102 | Potri.010G067900.1 | 1.0802  | 5.3398   | -2.3055 | Down | 9.06E-12  | 2.84E-11  |
| Unigene113719 | Potri.010G054300.5 | 2.4482  | 12.1021  | -2.3055 | Down | 9.06E-12  | 2.84E-11  |
| Unigene119249 | Potri.006G148100.1 | 0.9846  | 4.8672   | -2.3055 | Down | 9.06E-12  | 2.84E-11  |
| Unigene4552   | Potri.003G190300.2 | 1.5206  | 7.5167   | -2.3055 | Down | 9.06E-12  | 2.84E-11  |
| Unigene32846  | Potri.001G093900.1 | 3.4884  | 17.2449  | -2.3055 | Down | 1.31E-158 | 5.06E-157 |
| Unigene15814  | Potri.007G097100.1 | 37.4806 | 185.3201 | -2.3058 | Down | 1.05E-126 | 3.03E-125 |
| Unigene92325  | Potri.006G063000.1 | 67.2028 | 332.2777 | -2.3058 | Down | 0         | 0         |
| Unigene33794  | Potri.019G081600.1 | 4.863   | 24.0483  | -2.306  | Down | 3.87E-62  | 4.78E-61  |
| Unigene7126   | Potri.014G066000.4 | 2.2858  | 11.3056  | -2.3063 | Down | 7.59E-15  | 2.75E-14  |
| Unigene1744   | Potri.007G094400.1 | 20.6294 | 102.0345 | -2.3063 | Down | 2.40E-121 | 6.56E-120 |
| Unigene16265  | Potri.005G033100.1 | 39.137  | 193.6016 | -2.3065 | Down | 1.98E-130 | 5.90E-129 |
| Unigene45784  | Potri.001G125700.1 | 10.7786 | 53.3256  | -2.3067 | Down | 1.16E-47  | 1.08E-46  |
| Unigene119477 | Potri.012G016900.2 | 1.1697  | 5.7874   | -2.3068 | Down | 6.52E-18  | 2.68E-17  |
| Unigene12483  | Potri.005G187300.2 | 16.0117 | 79.2336  | -2.307  | Down | 1.29E-212 | 7.18E-211 |
| Unigene26513  | Potri.018G026900.1 | 13.6865 | 67.7315  | -2.3071 | Down | 9.03E-57  | 1.01E-55  |
| Unigene33028  | Potri.006G078000.2 | 8.0984  | 40.0766  | -2.3071 | Down | 1.98E-147 | 6.93E-146 |
| Unigene49251  | Potri.016G063800.4 | 1.6647  | 8.2388   | -2.3072 | Down | 5.69E-21  | 2.62E-20  |
| Unigene39239  | Potri.012G061900.3 | 1.6588  | 8.2109   | -2.3074 | Down | 5.03E-24  | 2.55E-23  |

|               |                    |         |          |         |      |           |           |
|---------------|--------------------|---------|----------|---------|------|-----------|-----------|
| Unigene85662  | Potri.006G218900.1 | 32.19   | 159.3646 | -2.3076 | Down | 3.50E-154 | 1.30E-152 |
| Unigene31054  | Potri.007G135000.1 | 1.3575  | 6.7207   | -2.3077 | Down | 4.48E-27  | 2.50E-26  |
| Unigene18757  | Potri.018G123700.1 | 2.8692  | 14.2062  | -2.3078 | Down | 4.02E-30  | 2.45E-29  |
| Unigene81502  | Potri.012G007000.3 | 6.8748  | 34.0392  | -2.3078 | Down | 4.02E-30  | 2.45E-29  |
| Unigene38979  | Potri.004G193500.2 | 5.0521  | 25.0144  | -2.3078 | Down | 4.02E-30  | 2.45E-29  |
| Unigene44018  | Potri.013G150300.2 | 4.2257  | 20.9243  | -2.3079 | Down | 3.63E-33  | 2.40E-32  |
| Unigene29911  | Potri.008G136500.1 | 9.1489  | 45.3031  | -2.3079 | Down | 3.63E-33  | 2.40E-32  |
| Unigene22942  | Potri.001G290600.2 | 1.6382  | 8.1117   | -2.3079 | Down | 3.63E-33  | 2.41E-32  |
| Unigene17196  | Potri.016G032600.2 | 5.4565  | 27.0241  | -2.3082 | Down | 2.74E-42  | 2.27E-41  |
| Unigene24480  | Potri.007G133700.1 | 5.4063  | 26.7762  | -2.3082 | Down | 6.30E-86  | 1.12E-84  |
| Unigene11990  | Potri.015G109800.1 | 2.1661  | 10.7293  | -2.3084 | Down | 2.12E-51  | 2.13E-50  |
| Unigene1067   | Potri.012G048700.1 | 23.6855 | 117.3386 | -2.3086 | Down | 5.44E-285 | 4.49E-283 |
| Unigene42477  | Potri.001G276900.1 | 2.4743  | 12.2574  | -2.3086 | Down | 1.43E-66  | 1.90E-65  |
| Unigene83125  | Potri.010G119500.1 | 37.998  | 188.2835 | -2.3089 | Down | 1.60E-166 | 6.60E-165 |
| Unigene110495 | Potri.T063300.1    | 0.8326  | 4.1262   | -2.3091 | Down | 2.60E-04  | 4.76E-04  |
| Unigene96736  | Potri.018G079600.1 | 1.021   | 5.0598   | -2.3091 | Down | 1.40E-10  | 4.12E-10  |
| Unigene116034 | Potri.017G151400.1 | 0.6095  | 3.0205   | -2.3091 | Down | 2.60E-04  | 4.76E-04  |
| Unigene90968  | Potri.017G083200.5 | 0.9302  | 4.6098   | -2.3091 | Down | 1.79E-07  | 4.35E-07  |
| Unigene109349 | Potri.016G131400.3 | 0.8715  | 4.319    | -2.3091 | Down | 2.60E-04  | 4.76E-04  |
| Unigene69673  | Potri.015G040100.1 | 1.3713  | 6.796    | -2.3091 | Down | 1.40E-10  | 4.12E-10  |
| Unigene113931 | Potri.013G128100.1 | 6.4064  | 31.7494  | -2.3091 | Down | 5.98E-29  | 3.52E-28  |
| Unigene17577  | Potri.012G059100.3 | 1.1608  | 5.7527   | -2.3091 | Down | 1.40E-10  | 4.12E-10  |
| Unigene19527  | Potri.010G051900.3 | 8.9827  | 44.5171  | -2.3091 | Down | 2.10E-65  | 2.74E-64  |
| Unigene67438  | Potri.009G123400.1 | 5.5068  | 27.2911  | -2.3091 | Down | 3.39E-47  | 3.13E-46  |
| Unigene30504  | Potri.009G095900.1 | 3.8256  | 18.9592  | -2.3091 | Down | 6.67E-26  | 3.59E-25  |
| Unigene64946  | Potri.008G132400.1 | 2.4326  | 12.0556  | -2.3091 | Down | 1.40E-10  | 4.12E-10  |
| Unigene67169  | Potri.006G258800.1 | 7.5201  | 37.2685  | -2.3091 | Down | 5.39E-32  | 3.46E-31  |
| Unigene41684  | Potri.004G046700.1 | 1.5413  | 7.6385   | -2.3091 | Down | 1.40E-10  | 4.12E-10  |
| Unigene10384  | Potri.002G104100.3 | 0.9739  | 4.8264   | -2.3091 | Down | 1.79E-07  | 4.35E-07  |
| Unigene35221  | Potri.001G000400.4 | 0.9233  | 4.5755   | -2.3091 | Down | 2.60E-04  | 4.76E-04  |
| Unigene27464  | Potri.016G060000.1 | 0.7011  | 3.4747   | -2.3092 | Down | 2.60E-04  | 4.76E-04  |
| Unigene118171 | Potri.012G124600.1 | 2.2578  | 11.1896  | -2.3092 | Down | 9.83E-17  | 3.86E-16  |
| Unigene26545  | Potri.011G033200.1 | 0.8923  | 4.4223   | -2.3092 | Down | 2.60E-04  | 4.76E-04  |
| Unigene9887   | Potri.006G150200.4 | 2.422   | 12.0034  | -2.3092 | Down | 1.15E-13  | 3.97E-13  |
| Unigene112069 | Potri.006G056600.1 | 0.7803  | 3.8672   | -2.3092 | Down | 2.60E-04  | 4.76E-04  |
| Unigene109647 | Potri.006G054800.1 | 0.8634  | 4.279    | -2.3092 | Down | 2.60E-04  | 4.76E-04  |
| Unigene103213 | Potri.005G065200.2 | 0.8477  | 4.2012   | -2.3092 | Down | 2.60E-04  | 4.76E-04  |
| Unigene103026 | Potri.005G045100.1 | 0.7902  | 3.9164   | -2.3092 | Down | 2.60E-04  | 4.76E-04  |
| Unigene36010  | Potri.002G099800.2 | 0.9187  | 4.553    | -2.3092 | Down | 2.60E-04  | 4.76E-04  |

|               |                    |         |          |         |      |           |           |
|---------------|--------------------|---------|----------|---------|------|-----------|-----------|
| Unigene106243 | Potri.001G125700.1 | 0.6806  | 3.3732   | -2.3092 | Down | 1.79E-07  | 4.35E-07  |
| Unigene595    | Potri.012G119000.1 | 4.6083  | 22.8493  | -2.3098 | Down | 1.47E-111 | 3.60E-110 |
| Unigene20754  | Potri.001G157300.1 | 5.6875  | 28.2151  | -2.3106 | Down | 8.89E-28  | 5.06E-27  |
| Unigene15604  | Potri.002G213400.1 | 2.5959  | 12.8799  | -2.3108 | Down | 9.95E-25  | 5.16E-24  |
| Unigene11564  | Potri.002G056000.1 | 9.2375  | 45.8337  | -2.3108 | Down | 4.01E-114 | 1.01E-112 |
| Unigene71310  | Potri.016G125300.3 | 13.1102 | 65.0523  | -2.3109 | Down | 7.37E-45  | 6.44E-44  |
| Unigene16165  | Potri.012G121700.8 | 4.2591  | 21.1355  | -2.311  | Down | 1.12E-21  | 5.29E-21  |
| Unigene1929   | Potri.010G064100.1 | 15.5525 | 77.1755  | -2.311  | Down | 4.23E-145 | 1.45E-143 |
| Unigene16483  | Potri.004G199400.5 | 2.9804  | 14.7897  | -2.311  | Down | 1.12E-21  | 5.29E-21  |
| Unigene25343  | Potri.004G171600.1 | 8.8873  | 44.1022  | -2.311  | Down | 8.05E-42  | 6.59E-41  |
| Unigene18218  | Potri.017G006800.1 | 9.5729  | 47.5062  | -2.3111 | Down | 5.15E-119 | 1.37E-117 |
| Unigene7324   | Potri.014G196500.1 | 0.9161  | 4.5473   | -2.3114 | Down | 1.28E-18  | 5.42E-18  |
| Unigene72623  | Potri.014G025200.2 | 30.2721 | 150.2577 | -2.3114 | Down | 7.16E-104 | 1.60E-102 |
| Unigene106907 | Potri.009G111000.1 | 1.0023  | 4.9749   | -2.3114 | Down | 1.28E-18  | 5.42E-18  |
| Unigene33714  | Potri.007G046200.3 | 13.1746 | 65.3931  | -2.3114 | Down | 7.18E-189 | 3.49E-187 |
| Unigene3542   | Potri.006G047700.2 | 8.0544  | 39.9786  | -2.3114 | Down | 8.43E-53  | 8.71E-52  |
| Unigene10710  | Potri.002G153700.2 | 3.312   | 16.4394  | -2.3114 | Down | 8.43E-53  | 8.71E-52  |
| Unigene44653  | Potri.002G008700.1 | 3.6234  | 17.9877  | -2.3116 | Down | 1.07E-32  | 7.00E-32  |
| Unigene32634  | Potri.001G370500.1 | 3.9923  | 19.8205  | -2.3117 | Down | 1.09E-150 | 3.94E-149 |
| Unigene31759  | Potri.010G001000.1 | 1.865   | 9.2601   | -2.3119 | Down | 1.49E-15  | 5.55E-15  |
| Unigene32026  | Potri.011G007600.1 | 8.4207  | 41.8291  | -2.3125 | Down | 4.74E-183 | 2.22E-181 |
| Unigene47966  | Potri.018G076200.2 | 10.0709 | 50.0306  | -2.3126 | Down | 1.43E-34  | 9.82E-34  |
| Unigene4162   | Potri.013G013200.1 | 0.9012  | 4.477    | -2.3126 | Down | 1.77E-12  | 5.73E-12  |
| Unigene11910  | Potri.011G156100.7 | 7.5949  | 37.7305  | -2.3126 | Down | 1.55E-56  | 1.73E-55  |
| Unigene57110  | Potri.006G241000.3 | 2.1588  | 10.7247  | -2.3126 | Down | 1.77E-12  | 5.73E-12  |
| Unigene87752  | Potri.005G244700.1 | 50.1975 | 249.3736 | -2.3126 | Down | 1.64E-264 | 1.22E-262 |
| Unigene43330  | Potri.003G136100.3 | 1.6159  | 8.0274   | -2.3126 | Down | 1.47E-45  | 1.30E-44  |
| Unigene58505  | Potri.002G046300.1 | 2.0532  | 10.1999  | -2.3126 | Down | 1.77E-12  | 5.73E-12  |
| Unigene39636  | Potri.015G145400.1 | 3.2413  | 16.1054  | -2.3129 | Down | 1.60E-42  | 1.33E-41  |
| Unigene8983   | Potri.016G093100.1 | 29.0569 | 144.3856 | -2.313  | Down | 7.02E-300 | 6.22E-298 |
| Unigene99038  | Potri.008G009100.1 | 1.168   | 5.8045   | -2.3131 | Down | 1.68E-20  | 7.62E-20  |
| Unigene11437  | Potri.001G136600.1 | 5.815   | 28.8972  | -2.3131 | Down | 2.27E-69  | 3.17E-68  |
| Unigene18229  | Potri.005G074300.1 | 22.5106 | 111.8841 | -2.3133 | Down | 3.24E-211 | 1.79E-209 |
| Unigene43616  | Potri.006G069100.2 | 5.8542  | 29.1027  | -2.3136 | Down | 2.16E-44  | 1.87E-43  |
| Unigene67366  | Potri.010G111700.2 | 1.1573  | 5.7544   | -2.3139 | Down | 2.17E-09  | 5.99E-09  |
| Unigene50544  | Potri.018G130300.1 | 3.4268  | 17.0397  | -2.314  | Down | 2.12E-33  | 1.41E-32  |
| Unigene8988   | Potri.018G000900.1 | 2.0568  | 10.2274  | -2.314  | Down | 3.60E-65  | 4.68E-64  |
| Unigene103256 | Potri.010G210300.4 | 1.1628  | 5.782    | -2.314  | Down | 2.17E-09  | 5.99E-09  |
| Unigene38784  | Potri.006G083700.3 | 1.0339  | 5.141    | -2.314  | Down | 2.17E-09  | 5.99E-09  |

|               |                    |         |          |         |      |           |           |
|---------------|--------------------|---------|----------|---------|------|-----------|-----------|
| Unigene73692  | Potri.004G171600.1 | 11.4362 | 56.8659  | -2.314  | Down | 2.36E-41  | 1.92E-40  |
| Unigene48837  | Potri.004G069600.1 | 21.1976 | 105.4038 | -2.314  | Down | 1.45E-128 | 4.25E-127 |
| Unigene8438   | Potri.016G064500.3 | 5.1182  | 25.4557  | -2.3143 | Down | 2.92E-46  | 2.64E-45  |
| Unigene48130  | Potri.010G138600.1 | 4.6624  | 23.192   | -2.3145 | Down | 2.35E-30  | 1.44E-29  |
| Unigene51925  | Potri.007G113600.1 | 4.255   | 21.1655  | -2.3145 | Down | 2.35E-30  | 1.44E-29  |
| Unigene11098  | Potri.001G165800.1 | 3.5769  | 17.7931  | -2.3145 | Down | 5.46E-150 | 1.96E-148 |
| Unigene15059  | Potri.008G159800.1 | 10.2764 | 51.12    | -2.3146 | Down | 3.64E-51  | 3.63E-50  |
| Unigene2925   | Potri.015G125100.1 | 9.679   | 48.1544  | -2.3147 | Down | 7.49E-152 | 2.73E-150 |
| Unigene35101  | Potri.011G114500.1 | 2.3704  | 11.7927  | -2.3147 | Down | 3.19E-43  | 2.69E-42  |
| Unigene86022  | Potri.001G027400.1 | 11.1773 | 55.6098  | -2.3148 | Down | 4.55E-56  | 5.02E-55  |
| Unigene15161  | Potri.018G095800.1 | 7.3205  | 36.4296  | -2.3151 | Down | 2.62E-27  | 1.47E-26  |
| Unigene13580  | Potri.015G120400.6 | 1.8561  | 9.2369   | -2.3151 | Down | 2.26E-14  | 8.00E-14  |
| Unigene37033  | Potri.012G044700.1 | 5.6352  | 28.0429  | -2.3151 | Down | 2.62E-27  | 1.47E-26  |
| Unigene66250  | Potri.012G004700.5 | 3.2774  | 16.3095  | -2.3151 | Down | 2.26E-14  | 8.00E-14  |
| Unigene117564 | Potri.008G025800.6 | 2.117   | 10.535   | -2.3151 | Down | 2.26E-14  | 8.00E-14  |
| Unigene88566  | Potri.005G232800.1 | 12.8772 | 64.105   | -2.3156 | Down | 1.24E-72  | 1.81E-71  |
| Unigene117274 | Potri.005G116400.3 | 13.9477 | 69.4419  | -2.3158 | Down | 1.99E-82  | 3.36E-81  |
| Unigene7890   | Potri.017G058600.2 | 7.1839  | 35.7688  | -2.3159 | Down | 6.28E-110 | 1.52E-108 |
| Unigene45026  | Potri.014G149800.1 | 39.6772 | 197.5639 | -2.3159 | Down | 0         | 0         |
| Unigene104702 | Potri.003G083300.2 | 1.4111  | 7.0262   | -2.3159 | Down | 2.94E-24  | 1.50E-23  |
| Unigene44587  | Potri.001G238300.1 | 2.0355  | 10.1352  | -2.3159 | Down | 5.82E-47  | 5.34E-46  |
| Unigene7703   | Potri.003G221800.2 | 2.7789  | 13.8386  | -2.3161 | Down | 3.49E-29  | 2.07E-28  |
| Unigene33363  | Potri.001G204900.1 | 9.6456  | 48.0343  | -2.3161 | Down | 1.10E-116 | 2.87E-115 |
| Unigene12468  | Potri.011G087000.1 | 5.1955  | 25.8748  | -2.3162 | Down | 1.43E-66  | 1.91E-65  |
| Unigene25432  | Potri.002G213100.1 | 5.1616  | 25.7059  | -2.3162 | Down | 4.22E-34  | 2.86E-33  |
| Unigene44901  | Potri.017G096500.1 | 50.136  | 249.7275 | -2.3164 | Down | 0         | 0         |
| Unigene43708  | Potri.005G128900.1 | 4.3553  | 21.6968  | -2.3166 | Down | 2.47E-73  | 3.65E-72  |
| Unigene71657  | Potri.009G044200.1 | 40.4078 | 201.32   | -2.3168 | Down | 6.00E-137 | 1.91E-135 |
| Unigene52615  | Potri.015G113200.2 | 0.8266  | 4.1187   | -2.3169 | Down | 2.88E-06  | 6.38E-06  |
| Unigene49417  | Potri.014G157100.2 | 1.5109  | 7.5284   | -2.3169 | Down | 2.71E-11  | 8.31E-11  |
| Unigene101914 | Potri.008G138000.2 | 0.9816  | 4.891    | -2.3169 | Down | 2.88E-06  | 6.39E-06  |
| Unigene102660 | Potri.006G040500.1 | 2.3404  | 11.6616  | -2.3169 | Down | 2.71E-11  | 8.32E-11  |
| Unigene118011 | Potri.005G016400.1 | 0.746   | 3.7171   | -2.3169 | Down | 2.88E-06  | 6.38E-06  |
| Unigene115826 | Potri.005G005900.1 | 0.9947  | 4.9562   | -2.3169 | Down | 2.88E-06  | 6.38E-06  |
| Unigene97025  | Potri.003G062700.1 | 0.7711  | 3.842    | -2.3169 | Down | 2.88E-06  | 6.38E-06  |
| Unigene114422 | Potri.001G350700.1 | 2.2186  | 11.0547  | -2.3169 | Down | 2.71E-11  | 8.31E-11  |
| Unigene118534 | Potri.001G314500.1 | 0.6602  | 3.2895   | -2.3169 | Down | 2.88E-06  | 6.38E-06  |
| Unigene55580  | Potri.001G171800.1 | 1.1611  | 5.7854   | -2.3169 | Down | 2.88E-06  | 6.38E-06  |
| Unigene116909 | Potri.015G144100.1 | 0.8854  | 4.412    | -2.317  | Down | 2.88E-06  | 6.38E-06  |

|               |                    |         |          |         |      |           |           |
|---------------|--------------------|---------|----------|---------|------|-----------|-----------|
| Unigene35298  | Potri.015G104200.3 | 1.4485  | 7.2177   | -2.317  | Down | 2.88E-06  | 6.38E-06  |
| Unigene97274  | Potri.015G038500.2 | 1.126   | 5.6108   | -2.317  | Down | 2.88E-06  | 6.38E-06  |
| Unigene15629  | Potri.008G097400.1 | 1.5501  | 7.7239   | -2.317  | Down | 2.71E-11  | 8.31E-11  |
| Unigene18163  | Potri.005G055900.1 | 6.6841  | 33.3055  | -2.317  | Down | 2.66E-70  | 3.75E-69  |
| Unigene33485  | Potri.004G207100.6 | 5.3497  | 26.6567  | -2.317  | Down | 8.58E-46  | 7.67E-45  |
| Unigene48541  | Potri.004G200800.1 | 0.9533  | 4.7503   | -2.317  | Down | 2.88E-06  | 6.38E-06  |
| Unigene36449  | Potri.004G002100.1 | 0.9181  | 4.5749   | -2.317  | Down | 2.88E-06  | 6.38E-06  |
| Unigene30977  | Potri.003G222600.1 | 1.7149  | 8.5451   | -2.317  | Down | 2.71E-11  | 8.31E-11  |
| Unigene102215 | Potri.003G063000.7 | 1.1521  | 5.7407   | -2.317  | Down | 2.88E-06  | 6.38E-06  |
| Unigene45080  | Potri.018G085400.1 | 3.0501  | 15.2031  | -2.3174 | Down | 1.45E-52  | 1.49E-51  |
| Unigene38207  | Potri.018G042200.1 | 2.7855  | 13.8837  | -2.3174 | Down | 2.69E-108 | 6.35E-107 |
| Unigene93060  | Potri.007G034500.1 | 19.7386 | 98.3819  | -2.3174 | Down | 9.75E-174 | 4.22E-172 |
| Unigene53735  | Potri.018G145800.4 | 10.7183 | 53.4263  | -2.3175 | Down | 1.16E-47  | 1.08E-46  |
| Unigene49030  | Potri.010G002300.1 | 7.7081  | 38.4258  | -2.3176 | Down | 4.93E-74  | 7.37E-73  |
| Unigene4945   | Potri.010G203900.1 | 2.0591  | 10.2681  | -2.3181 | Down | 4.39E-23  | 2.16E-22  |
| Unigene32248  | Potri.019G041400.3 | 5.8628  | 29.2405  | -2.3183 | Down | 7.23E-73  | 1.06E-71  |
| Unigene104101 | Potri.014G153700.1 | 1.7304  | 8.6308   | -2.3184 | Down | 3.80E-18  | 1.58E-17  |
| Unigene37397  | Potri.003G052400.1 | 16.2588 | 81.1064  | -2.3186 | Down | 9.85E-75  | 1.49E-73  |
| Unigene51160  | Potri.008G036300.3 | 9.4492  | 47.1506  | -2.319  | Down | 4.90E-60  | 5.83E-59  |
| Unigene33568  | Potri.001G148400.3 | 6.562   | 32.7435  | -2.319  | Down | 4.90E-60  | 5.83E-59  |
| Unigene107231 | Potri.009G147200.1 | 0.6827  | 3.4068   | -2.3191 | Down | 3.44E-13  | 1.16E-12  |
| Unigene82552  | Potri.002G237000.1 | 31.7473 | 158.4401 | -2.3192 | Down | 1.41E-138 | 4.55E-137 |
| Unigene51226  | Potri.002G149200.1 | 5.7979  | 28.9417  | -2.3195 | Down | 1.51E-38  | 1.15E-37  |
| Unigene97902  | Potri.T003400.1    | 0.9646  | 4.8153   | -2.3196 | Down | 4.98E-20  | 2.22E-19  |
| Unigene119024 | Potri.008G142600.1 | 2.0345  | 10.1559  | -2.3196 | Down | 4.98E-20  | 2.22E-19  |
| Unigene27262  | Potri.006G019200.1 | 11.9976 | 59.8939  | -2.3197 | Down | 9.05E-64  | 1.15E-62  |
| Unigene16270  | Potri.018G124700.4 | 3.3354  | 16.6525  | -2.3198 | Down | 4.24E-52  | 4.32E-51  |
| Unigene23082  | Potri.001G204000.1 | 4.5277  | 22.609   | -2.32   | Down | 2.04E-40  | 1.62E-39  |
| Unigene11169  | Potri.011G050600.1 | 3.5923  | 17.9405  | -2.3202 | Down | 3.20E-133 | 9.83E-132 |
| Unigene30384  | Potri.001G229100.1 | 1.0741  | 5.365    | -2.3204 | Down | 3.42E-08  | 8.75E-08  |
| Unigene88487  | Potri.019G091700.1 | 8.599   | 42.9525  | -2.3205 | Down | 4.61E-49  | 4.41E-48  |
| Unigene117521 | Potri.011G146800.3 | 1.121   | 5.5996   | -2.3205 | Down | 3.42E-08  | 8.75E-08  |
| Unigene94840  | Potri.010G048400.4 | 1.6346  | 8.1651   | -2.3205 | Down | 3.42E-08  | 8.75E-08  |
| Unigene41437  | Potri.008G094200.2 | 2.1041  | 10.51    | -2.3205 | Down | 4.42E-15  | 1.62E-14  |
| Unigene52858  | Potri.006G106400.1 | 1.1334  | 5.6615   | -2.3205 | Down | 3.42E-08  | 8.75E-08  |
| Unigene24040  | Potri.005G044300.3 | 1.2121  | 6.0545   | -2.3205 | Down | 4.42E-15  | 1.62E-14  |
| Unigene1541   | Potri.004G035800.2 | 2.8296  | 14.1341  | -2.3205 | Down | 6.56E-22  | 3.11E-21  |
| Unigene42931  | Potri.001G233900.1 | 1.3601  | 6.7937   | -2.3205 | Down | 2.75E-42  | 2.28E-41  |
| Unigene23219  | Potri.001G032800.1 | 6.1963  | 30.957   | -2.3208 | Down | 1.81E-64  | 2.32E-63  |

|               |                    |         |          |         |      |           |           |
|---------------|--------------------|---------|----------|---------|------|-----------|-----------|
| Unigene71040  | Potri.002G184200.2 | 78.8672 | 394.0549 | -2.3209 | Down | 7.01E-263 | 5.17E-261 |
| Unigene32251  | Potri.009G131200.1 | 12.6884 | 63.4007  | -2.321  | Down | 4.23E-73  | 6.23E-72  |
| Unigene1856   | Potri.001G368600.1 | 2.5303  | 12.6431  | -2.321  | Down | 2.24E-37  | 1.65E-36  |
| Unigene167    | Potri.003G102700.1 | 4.8697  | 24.3344  | -2.3211 | Down | 7.35E-233 | 4.58E-231 |
| Unigene28534  | Potri.007G096100.3 | 11.9891 | 59.919   | -2.3213 | Down | 3.34E-68  | 4.56E-67  |
| Unigene13809  | Potri.006G096200.1 | 6.2455  | 31.2136  | -2.3213 | Down | 2.36E-90  | 4.44E-89  |
| Unigene78485  | Potri.013G140500.1 | 56.8149 | 284.0094 | -2.3216 | Down | 8.77E-224 | 5.20E-222 |
| Unigene69179  | Potri.006G186800.2 | 4.2165  | 21.0827  | -2.3219 | Down | 1.15E-25  | 6.14E-25  |
| Unigene8783   | Potri.018G143400.1 | 6.9364  | 34.6862  | -2.3221 | Down | 4.90E-67  | 6.59E-66  |
| Unigene42884  | Potri.014G165400.1 | 7.7769  | 38.89    | -2.3221 | Down | 0         | 0         |
| Unigene79370  | Potri.006G087200.1 | 12.4846 | 62.4365  | -2.3222 | Down | 1.24E-51  | 1.26E-50  |
| Unigene93483  | Potri.010G182600.1 | 16.3863 | 81.9503  | -2.3223 | Down | 5.31E-160 | 2.07E-158 |
| Unigene22544  | Potri.009G120800.1 | 20.2782 | 101.423  | -2.3224 | Down | 6.25E-205 | 3.34E-203 |
| Unigene8802   | Potri.018G026200.3 | 1.8195  | 9.1012   | -2.3225 | Down | 4.20E-10  | 1.20E-09  |
| Unigene94823  | Potri.015G034600.2 | 1.6551  | 8.279    | -2.3225 | Down | 7.48E-19  | 3.19E-18  |
| Unigene118922 | Potri.012G131500.1 | 1.0004  | 5.0039   | -2.3225 | Down | 4.20E-10  | 1.20E-09  |
| Unigene169    | Potri.012G081500.1 | 5.598   | 28.0015  | -2.3225 | Down | 0         | 0         |
| Unigene72888  | Potri.008G107900.1 | 5.0211  | 25.1158  | -2.3225 | Down | 7.48E-19  | 3.19E-18  |
| Unigene17485  | Potri.006G187900.2 | 3.3618  | 16.8157  | -2.3225 | Down | 1.53E-27  | 8.65E-27  |
| Unigene8727   | Potri.001G383600.1 | 5.1702  | 25.8618  | -2.3225 | Down | 7.48E-19  | 3.19E-18  |
| Unigene22221  | Potri.006G144500.1 | 24.6418 | 123.2677 | -2.3226 | Down | 0         | 0         |
| Unigene10856  | Potri.001G024600.3 | 6.407   | 32.0514  | -2.3227 | Down | 1.64E-98  | 3.46E-97  |
| Unigene46848  | Potri.019G133500.1 | 9.3025  | 46.5455  | -2.323  | Down | 7.19E-66  | 9.48E-65  |
| Unigene38298  | Potri.001G124000.1 | 9.7161  | 48.6157  | -2.323  | Down | 1.29E-93  | 2.53E-92  |
| Unigene51703  | Potri.014G122900.1 | 3.4723  | 17.3774  | -2.3232 | Down | 9.82E-21  | 4.48E-20  |
| Unigene684    | Potri.004G157000.2 | 9.3912  | 46.9983  | -2.3232 | Down | 1.20E-154 | 4.49E-153 |
| Unigene39935  | Potri.015G060000.1 | 17.6251 | 88.2087  | -2.3233 | Down | 7.86E-108 | 1.84E-106 |
| Unigene12332  | Potri.010G063500.1 | 13.1336 | 65.7356  | -2.3234 | Down | 1.08E-109 | 2.58E-108 |
| Unigene6422   | Potri.006G157700.1 | 5.8414  | 29.2375  | -2.3234 | Down | 5.71E-61  | 6.91E-60  |
| Unigene32239  | Potri.013G143900.1 | 1.7531  | 8.7751   | -2.3235 | Down | 8.07E-42  | 6.61E-41  |
| Unigene22395  | Potri.008G180400.1 | 21.8469 | 109.3612 | -2.3236 | Down | 4.00E-305 | 3.62E-303 |
| Unigene23310  | Potri.006G240300.1 | 7.2478  | 36.281   | -2.3236 | Down | 2.48E-52  | 2.54E-51  |
| Unigene46497  | Potri.015G081500.1 | 2.3616  | 11.8236  | -2.3238 | Down | 1.09E-43  | 9.29E-43  |
| Unigene41467  | Potri.006G109600.3 | 7.3165  | 36.6304  | -2.3238 | Down | 3.65E-33  | 2.42E-32  |
| Unigene103170 | Potri.004G078200.3 | 2.0066  | 10.0463  | -2.3238 | Down | 5.27E-12  | 1.67E-11  |
| Unigene22764  | Potri.003G123600.1 | 5.058   | 25.3234  | -2.3238 | Down | 3.77E-117 | 9.84E-116 |
| Unigene45858  | Potri.006G128800.1 | 2.886   | 14.451   | -2.324  | Down | 6.57E-100 | 1.41E-98  |
| Unigene20315  | Potri.001G361200.1 | 1.3134  | 6.5796   | -2.3247 | Down | 6.73E-14  | 2.33E-13  |
| Unigene106942 | Potri.009G116300.1 | 0.9198  | 4.6082   | -2.3248 | Down | 6.73E-14  | 2.34E-13  |

|               |                     |         |          |         |      |           |           |
|---------------|---------------------|---------|----------|---------|------|-----------|-----------|
| Unigene17606  | Potri.009G114900.1  | 4.6624  | 23.3577  | -2.3248 | Down | 2.28E-26  | 1.24E-25  |
| Unigene10385  | Potri.001G358300.4  | 2.3682  | 11.8642  | -2.3248 | Down | 6.73E-14  | 2.34E-13  |
| Unigene908    | Potri.019G084700.1  | 2.7137  | 13.5978  | -2.325  | Down | 7.53E-94  | 1.48E-92  |
| Unigene11033  | Potri.011G002900.2  | 6.3775  | 31.9591  | -2.3252 | Down | 1.75E-136 | 5.55E-135 |
| Unigene33870  | Potri.002G079100.1  | 1.418   | 7.1071   | -2.3254 | Down | 8.67E-16  | 3.27E-15  |
| Unigene12376  | Potri.001G201000.1  | 3.4211  | 17.1491  | -2.3256 | Down | 2.93E-46  | 2.64E-45  |
| Unigene105449 | Potri.005G070100.2  | 1.125   | 5.6408   | -2.326  | Down | 1.13E-17  | 4.59E-17  |
| Unigene62799  | Potri.013G047900.2  | 2.6255  | 13.1675  | -2.3263 | Down | 1.47E-19  | 6.46E-19  |
| Unigene11218  | Potri.002G033800.1  | 12.2306 | 61.3395  | -2.3263 | Down | 0         | 0         |
| Unigene30256  | Potri.T046200.1     | 17.7503 | 89.0277  | -2.3264 | Down | 2.20E-93  | 4.31E-92  |
| Unigene37887  | Potri.016G007500.1  | 7.5949  | 38.0941  | -2.3265 | Down | 1.81E-57  | 2.05E-56  |
| Unigene34113  | Potri.010G188500.2  | 7.6915  | 38.5814  | -2.3266 | Down | 2.46E-59  | 2.89E-58  |
| Unigene33466  | Potri.002G232100.6  | 1.745   | 8.7538   | -2.3267 | Down | 1.94E-21  | 9.04E-21  |
| Unigene24067  | Potri.017G130400.1  | 3.1573  | 15.8406  | -2.3269 | Down | 6.17E-65  | 8.00E-64  |
| Unigene11923  | Potri.006G266900.1  | 2.5749  | 12.9195  | -2.327  | Down | 2.56E-23  | 1.27E-22  |
| Unigene78402  | Potri.002G198500.1  | 6.0059  | 30.1389  | -2.3272 | Down | 3.39E-25  | 1.78E-24  |
| Unigene70776  | Potri.001G025100.16 | 22.8251 | 114.5578 | -2.3274 | Down | 5.35E-78  | 8.51E-77  |
| Unigene10513  | Potri.004G173900.1  | 18.1259 | 90.9811  | -2.3275 | Down | 5.37E-109 | 1.28E-107 |
| Unigene9738   | Potri.001G131400.2  | 12.1941 | 61.2052  | -2.3275 | Down | 1.96E-54  | 2.09E-53  |
| Unigene55720  | Potri.014G019400.1  | 76.6451 | 384.7267 | -2.3276 | Down | 2.26E-303 | 2.03E-301 |
| Unigene20709  | Potri.005G107600.2  | 3.6309  | 18.2256  | -2.3276 | Down | 6.00E-29  | 3.54E-28  |
| Unigene20883  | Potri.003G090000.2  | 4.7605  | 23.897   | -2.3276 | Down | 3.61E-58  | 4.15E-57  |
| Unigene29415  | Potri.013G036400.1  | 1.7086  | 8.5789   | -2.328  | Down | 1.44E-34  | 9.85E-34  |
| Unigene46891  | Potri.009G026100.1  | 8.1809  | 41.0815  | -2.3282 | Down | 2.60E-38  | 1.96E-37  |
| Unigene43359  | Potri.008G152600.1  | 7.9429  | 39.9031  | -2.3288 | Down | 3.53E-171 | 1.50E-169 |
| Unigene13058  | Potri.004G082900.2  | 6.1553  | 30.9307  | -2.3291 | Down | 5.42E-85  | 9.52E-84  |
| Unigene82686  | Potri.008G120400.2  | 39.2851 | 197.4117 | -2.3292 | Down | 9.71E-174 | 4.20E-172 |
| Unigene45415  | Potri.013G060900.1  | 6.8501  | 34.4262  | -2.3293 | Down | 3.14E-109 | 7.49E-108 |
| Unigene11501  | Potri.018G007100.1  | 25.4296 | 127.8369 | -2.3297 | Down | 0         | 0         |
| Unigene96350  | Potri.017G015600.3  | 0.7993  | 4.0185   | -2.3298 | Down | 4.76E-05  | 9.44E-05  |
| Unigene106202 | Potri.015G089700.1  | 0.6602  | 3.3191   | -2.3298 | Down | 4.76E-05  | 9.45E-05  |
| Unigene116961 | Potri.011G022600.3  | 0.6602  | 3.3191   | -2.3298 | Down | 4.76E-05  | 9.44E-05  |
| Unigene106248 | Potri.002G114800.1  | 0.7993  | 4.0185   | -2.3298 | Down | 6.55E-09  | 1.75E-08  |
| Unigene36188  | Potri.001G272100.1  | 0.9816  | 4.935    | -2.3298 | Down | 4.76E-05  | 9.44E-05  |
| Unigene82361  | Potri.001G094100.4  | 0.8575  | 4.3111   | -2.3298 | Down | 4.76E-05  | 9.44E-05  |
| Unigene115050 | Potri.018G104000.1  | 0.7964  | 4.0042   | -2.3299 | Down | 4.76E-05  | 9.45E-05  |
| Unigene68661  | Potri.018G103900.1  | 2.4027  | 12.0802  | -2.3299 | Down | 1.32E-14  | 4.71E-14  |
| Unigene35385  | Potri.018G095800.1  | 3.0987  | 15.5795  | -2.3299 | Down | 2.22E-18  | 9.28E-18  |
| Unigene75446  | Potri.018G060500.2  | 1.519   | 7.637    | -2.3299 | Down | 5.44E-07  | 1.28E-06  |

|               |                    |         |         |         |      |          |          |
|---------------|--------------------|---------|---------|---------|------|----------|----------|
| Unigene115412 | Potri.018G015200.3 | 0.7744  | 3.8934  | -2.3299 | Down | 4.76E-05 | 9.44E-05 |
| Unigene37984  | Potri.016G002600.1 | 1.497   | 7.5263  | -2.3299 | Down | 6.55E-09 | 1.75E-08 |
| Unigene103214 | Potri.015G135500.1 | 1.1536  | 5.7999  | -2.3299 | Down | 6.55E-09 | 1.75E-08 |
| Unigene31731  | Potri.014G084900.2 | 1.3758  | 6.9171  | -2.3299 | Down | 5.44E-07 | 1.28E-06 |
| Unigene49643  | Potri.013G156300.1 | 1.1438  | 5.7505  | -2.3299 | Down | 1.03E-12 | 3.37E-12 |
| Unigene38345  | Potri.013G115500.1 | 0.7784  | 3.9137  | -2.3299 | Down | 6.55E-09 | 1.75E-08 |
| Unigene43739  | Potri.013G079000.2 | 5.6352  | 28.332  | -2.3299 | Down | 3.76E-93 | 7.34E-92 |
| Unigene32107  | Potri.011G122900.1 | 1.977   | 9.9398  | -2.3299 | Down | 2.31E-48 | 2.18E-47 |
| Unigene116238 | Potri.011G052400.6 | 0.715   | 3.5948  | -2.3299 | Down | 4.76E-05 | 9.44E-05 |
| Unigene19988  | Potri.011G010900.1 | 1.1145  | 5.6035  | -2.3299 | Down | 8.13E-11 | 2.43E-10 |
| Unigene28659  | Potri.011G006600.1 | 3.0062  | 15.1144 | -2.3299 | Down | 4.24E-52 | 4.32E-51 |
| Unigene86182  | Potri.010G238500.1 | 0.751   | 3.7758  | -2.3299 | Down | 4.76E-05 | 9.44E-05 |
| Unigene77039  | Potri.010G220800.1 | 0.9773  | 4.9135  | -2.3299 | Down | 4.76E-05 | 9.44E-05 |
| Unigene31633  | Potri.010G068200.3 | 1.497   | 7.5263  | -2.3299 | Down | 6.55E-09 | 1.75E-08 |
| Unigene8178   | Potri.010G024900.4 | 2.1941  | 11.0312 | -2.3299 | Down | 6.55E-09 | 1.75E-08 |
| Unigene105985 | Potri.009G143300.2 | 2.3465  | 11.7975 | -2.3299 | Down | 1.59E-31 | 1.01E-30 |
| Unigene6285   | Potri.009G107800.4 | 0.8228  | 4.1367  | -2.3299 | Down | 4.76E-05 | 9.44E-05 |
| Unigene8534   | Potri.009G042400.3 | 3.443   | 17.3106 | -2.3299 | Down | 1.70E-16 | 6.61E-16 |
| Unigene5576   | Potri.009G018500.1 | 2.6197  | 13.1711 | -2.3299 | Down | 1.32E-14 | 4.71E-14 |
| Unigene83611  | Potri.008G217300.2 | 12.8002 | 64.3556 | -2.3299 | Down | 1.44E-59 | 1.69E-58 |
| Unigene8446   | Potri.008G181300.3 | 2.108   | 10.5983 | -2.3299 | Down | 5.05E-24 | 2.56E-23 |
| Unigene37233  | Potri.008G153800.6 | 6.1676  | 31.0091 | -2.3299 | Down | 8.92E-28 | 5.08E-27 |
| Unigene96959  | Potri.008G096000.2 | 1.1265  | 5.6637  | -2.3299 | Down | 5.44E-07 | 1.28E-06 |
| Unigene38022  | Potri.007G043300.2 | 5.8382  | 29.3527 | -2.3299 | Down | 5.05E-24 | 2.56E-23 |
| Unigene62045  | Potri.007G015300.1 | 0.9403  | 4.7277  | -2.3299 | Down | 4.76E-05 | 9.44E-05 |
| Unigene115591 | Potri.006G217500.1 | 0.7638  | 3.8402  | -2.3299 | Down | 4.76E-05 | 9.44E-05 |
| Unigene97062  | Potri.006G066600.1 | 1.0081  | 5.0684  | -2.3299 | Down | 6.55E-09 | 1.75E-08 |
| Unigene4265   | Potri.005G082400.3 | 3.2751  | 16.4661 | -2.3299 | Down | 1.03E-12 | 3.37E-12 |
| Unigene26481  | Potri.004G052500.2 | 1.0409  | 5.2334  | -2.3299 | Down | 4.76E-05 | 9.44E-05 |
| Unigene26030  | Potri.004G013400.2 | 0.8351  | 4.1985  | -2.3299 | Down | 4.76E-05 | 9.44E-05 |
| Unigene62116  | Potri.003G103600.2 | 2.7484  | 13.8181 | -2.3299 | Down | 1.32E-14 | 4.71E-14 |
| Unigene40583  | Potri.002G216400.3 | 1.3072  | 6.5723  | -2.3299 | Down | 8.13E-11 | 2.43E-10 |
| Unigene17598  | Potri.002G171900.1 | 1.6954  | 8.5241  | -2.3299 | Down | 1.70E-16 | 6.61E-16 |
| Unigene97360  | Potri.001G469700.1 | 1.711   | 8.6023  | -2.3299 | Down | 8.13E-11 | 2.43E-10 |
| Unigene33760  | Potri.001G347000.1 | 1.6912  | 8.5027  | -2.3299 | Down | 1.03E-12 | 3.37E-12 |
| Unigene45374  | Potri.001G249000.1 | 1.4887  | 7.4846  | -2.3299 | Down | 1.03E-12 | 3.37E-12 |
| Unigene4331   | Potri.001G204600.1 | 1.2961  | 6.5165  | -2.3299 | Down | 1.03E-12 | 3.37E-12 |
| Unigene4518   | Potri.001G042400.1 | 0.9325  | 4.6883  | -2.3299 | Down | 4.76E-05 | 9.44E-05 |
| Unigene51132  | Potri.002G139500.1 | 1.097   | 5.5156  | -2.33   | Down | 4.76E-05 | 9.44E-05 |



|               |                    |         |          |         |      |           |           |
|---------------|--------------------|---------|----------|---------|------|-----------|-----------|
| Unigene2880   | Potri.014G106000.3 | 21.0964 | 106.083  | -2.3301 | Down | 1.09E-285 | 9.02E-284 |
| Unigene11448  | Potri.013G003000.1 | 7.6055  | 38.2642  | -2.3309 | Down | 7.95E-132 | 2.41E-130 |
| Unigene2769   | Potri.012G034300.1 | 23.3641 | 117.5529 | -2.3309 | Down | 7.91E-247 | 5.35E-245 |
| Unigene44946  | Potri.001G091700.1 | 6.2166  | 31.2801  | -2.331  | Down | 3.43E-113 | 8.57E-112 |
| Unigene874    | Potri.005G087500.1 | 2.9345  | 14.7679  | -2.3313 | Down | 4.61E-49  | 4.41E-48  |
| Unigene42870  | Potri.002G072900.1 | 9.463   | 47.6269  | -2.3314 | Down | 4.32E-87  | 7.79E-86  |
| Unigene18187  | Potri.008G105800.1 | 4.4094  | 22.1953  | -2.3316 | Down | 1.03E-39  | 7.99E-39  |
| Unigene104197 | Potri.010G245200.1 | 2.1916  | 11.0339  | -2.3319 | Down | 4.23E-34  | 2.86E-33  |
| Unigene10690  | Potri.005G073300.1 | 5.0294  | 25.3213  | -2.3319 | Down | 7.24E-162 | 2.87E-160 |
| Unigene13898  | Potri.014G117800.1 | 3.2513  | 16.3708  | -2.332  | Down | 1.61E-91  | 3.07E-90  |
| Unigene28618  | Potri.011G087800.1 | 16.4707 | 82.9315  | -2.332  | Down | 4.71E-183 | 2.20E-181 |
| Unigene12253  | Potri.001G436400.1 | 3.8819  | 19.5471  | -2.3321 | Down | 2.36E-30  | 1.45E-29  |
| Unigene91669  | Potri.018G032600.1 | 3.9625  | 19.9534  | -2.3322 | Down | 2.36E-30  | 1.45E-29  |
| Unigene29058  | Potri.013G034000.1 | 2.3796  | 11.984   | -2.3323 | Down | 1.77E-28  | 1.03E-27  |
| Unigene50633  | Potri.006G086600.1 | 3.3414  | 16.8276  | -2.3323 | Down | 1.77E-28  | 1.03E-27  |
| Unigene660    | Potri.003G132900.1 | 4.6989  | 23.6637  | -2.3323 | Down | 3.39E-82  | 5.73E-81  |
| Unigene76997  | Potri.014G099300.1 | 20.0343 | 100.9017 | -2.3324 | Down | 1.83E-78  | 2.93E-77  |
| Unigene23516  | Potri.013G036300.1 | 2.9428  | 14.8212  | -2.3324 | Down | 1.68E-53  | 1.77E-52  |
| Unigene171    | Potri.008G160600.1 | 2.0462  | 10.3053  | -2.3324 | Down | 1.68E-53  | 1.77E-52  |
| Unigene2813   | Potri.001G220100.1 | 5.7664  | 29.0475  | -2.3327 | Down | 5.30E-71  | 7.56E-70  |
| Unigene75535  | Potri.001G131600.1 | 17.7215 | 89.2803  | -2.3328 | Down | 2.86E-67  | 3.85E-66  |
| Unigene44852  | Potri.017G121500.1 | 1.6518  | 8.3241   | -2.3333 | Down | 5.72E-21  | 2.63E-20  |
| Unigene46149  | Potri.014G042800.1 | 15.9469 | 80.3704  | -2.3334 | Down | 1.96E-75  | 3.00E-74  |
| Unigene100563 | Potri.005G247400.1 | 7.0989  | 35.7778  | -2.3334 | Down | 1.52E-38  | 1.15E-37  |
| Unigene23799  | Potri.005G133500.1 | 1.2918  | 6.5111   | -2.3335 | Down | 1.13E-36  | 8.16E-36  |
| Unigene909    | Potri.001G249000.1 | 11.5864 | 58.4087  | -2.3338 | Down | 1.50E-118 | 3.98E-117 |
| Unigene54126  | Potri.007G137200.1 | 9.2655  | 46.7121  | -2.3339 | Down | 1.83E-50  | 1.80E-49  |
| Unigene44567  | Potri.003G159000.4 | 7.5776  | 38.2037  | -2.3339 | Down | 4.19E-66  | 5.55E-65  |
| Unigene27211  | Potri.014G010700.1 | 1.7205  | 8.6747   | -2.334  | Down | 3.34E-17  | 1.34E-16  |
| Unigene85896  | Potri.010G100900.2 | 6.322   | 31.8757  | -2.334  | Down | 6.26E-33  | 4.12E-32  |
| Unigene54279  | Potri.001G257100.1 | 3.6284  | 18.2944  | -2.334  | Down | 3.34E-17  | 1.33E-16  |
| Unigene3671   | Potri.004G087300.1 | 19.7273 | 99.4807  | -2.3342 | Down | 3.92E-76  | 6.06E-75  |
| Unigene43328  | Potri.001G098700.1 | 2.0573  | 10.3756  | -2.3344 | Down | 7.39E-45  | 6.45E-44  |
| Unigene96887  | Potri.T040900.1    | 1.6412  | 8.2782   | -2.3346 | Down | 2.57E-15  | 9.50E-15  |
| Unigene1256   | Potri.006G074300.1 | 4.8448  | 24.4374  | -2.3346 | Down | 8.55E-112 | 2.11E-110 |
| Unigene27142  | Potri.014G099300.1 | 7.5802  | 38.2408  | -2.3348 | Down | 4.06E-41  | 3.27E-40  |
| Unigene99630  | Potri.001G106600.2 | 3.471   | 17.5105  | -2.3348 | Down | 4.06E-41  | 3.27E-40  |
| Unigene24585  | Potri.006G133900.3 | 6.2675  | 31.6211  | -2.3349 | Down | 2.63E-27  | 1.47E-26  |
| Unigene74893  | Potri.002G072900.2 | 24.8093 | 125.164  | -2.3349 | Down | 1.88E-92  | 3.62E-91  |

|               |                    |         |          |         |      |           |           |
|---------------|--------------------|---------|----------|---------|------|-----------|-----------|
| Unigene37442  | Potri.002G183000.1 | 19.6191 | 99.001   | -2.3352 | Down | 5.25E-160 | 2.04E-158 |
| Unigene4478   | Potri.014G086500.1 | 2.531   | 12.7732  | -2.3353 | Down | 2.00E-13  | 6.80E-13  |
| Unigene44756  | Potri.012G044700.1 | 2.1739  | 10.9708  | -2.3353 | Down | 1.98E-25  | 1.05E-24  |
| Unigene100260 | Potri.008G050400.1 | 2.8926  | 14.5979  | -2.3353 | Down | 2.00E-13  | 6.80E-13  |
| Unigene64630  | Potri.003G131800.1 | 5.0381  | 25.4252  | -2.3353 | Down | 2.24E-37  | 1.65E-36  |
| Unigene51070  | Potri.002G106200.1 | 3.1497  | 15.8955  | -2.3353 | Down | 2.00E-13  | 6.80E-13  |
| Unigene21233  | Potri.001G266700.1 | 10.2584 | 51.7691  | -2.3353 | Down | 1.37E-300 | 1.22E-298 |
| Unigene2289   | Potri.003G124800.2 | 7.8728  | 39.7328  | -2.3354 | Down | 1.53E-142 | 5.11E-141 |
| Unigene58755  | Potri.011G147400.2 | 7.3243  | 36.9704  | -2.3356 | Down | 1.67E-35  | 1.17E-34  |
| Unigene46106  | Potri.014G007500.1 | 2.3271  | 11.7475  | -2.3357 | Down | 1.49E-23  | 7.44E-23  |
| Unigene8161   | Potri.001G211700.2 | 15.9986 | 80.7644  | -2.3358 | Down | 2.50E-111 | 6.13E-110 |
| Unigene41075  | Potri.015G024100.1 | 10.2484 | 51.7401  | -2.3359 | Down | 1.33E-55  | 1.46E-54  |
| Unigene19481  | Potri.003G168300.1 | 21.326  | 107.6711 | -2.3359 | Down | 2.10E-161 | 8.30E-160 |
| Unigene117608 | Potri.014G051200.1 | 4.8128  | 24.3056  | -2.3363 | Down | 9.27E-32  | 5.91E-31  |
| Unigene13521  | Potri.010G193500.2 | 2.3404  | 11.8192  | -2.3363 | Down | 8.07E-42  | 6.60E-41  |
| Unigene30914  | Potri.008G021400.2 | 10.3405 | 52.2209  | -2.3363 | Down | 6.17E-72  | 8.94E-71  |
| Unigene94619  | Potri.001G231500.1 | 1.1324  | 5.719    | -2.3364 | Down | 1.58E-11  | 4.88E-11  |
| Unigene93389  | Potri.007G091000.1 | 39.459  | 199.3045 | -2.3365 | Down | 0         | 0         |
| Unigene48094  | Potri.001G097700.1 | 14.141  | 71.4281  | -2.3366 | Down | 2.94E-88  | 5.38E-87  |
| Unigene23282  | Potri.006G166500.1 | 3.73    | 18.8455  | -2.337  | Down | 4.45E-38  | 3.33E-37  |
| Unigene9492   | Potri.013G101000.1 | 10.9383 | 55.2694  | -2.3371 | Down | 1.80E-64  | 2.32E-63  |
| Unigene23168  | Potri.008G175900.1 | 11.7006 | 59.1287  | -2.3373 | Down | 2.73E-115 | 6.99E-114 |
| Unigene92843  | Potri.018G122300.2 | 8.9782  | 45.3755  | -2.3374 | Down | 6.22E-79  | 1.00E-77  |
| Unigene52397  | Potri.012G118600.2 | 1.4096  | 7.1259   | -2.3378 | Down | 6.56E-18  | 2.70E-17  |
| Unigene62511  | Potri.006G068000.1 | 1.1518  | 5.8226   | -2.3378 | Down | 1.26E-09  | 3.52E-09  |
| Unigene24948  | Potri.010G151400.1 | 4.5413  | 22.963   | -2.3381 | Down | 7.87E-49  | 7.50E-48  |
| Unigene3708   | Potri.018G092900.1 | 7.3565  | 37.2131  | -2.3387 | Down | 3.38E-82  | 5.70E-81  |
| Unigene44318  | Potri.006G069100.2 | 4.5713  | 23.1261  | -2.3388 | Down | 4.31E-45  | 3.78E-44  |
| Unigene7993   | Potri.005G045600.5 | 9.6272  | 48.7033  | -2.3388 | Down | 7.87E-132 | 2.39E-130 |
| Unigene118929 | Potri.003G090300.2 | 1.6372  | 8.2824   | -2.3388 | Down | 5.04E-16  | 1.92E-15  |
| Unigene106259 | Potri.006G102100.1 | 1.3259  | 6.7079   | -2.3389 | Down | 5.04E-16  | 1.92E-15  |
| Unigene73496  | Potri.007G031000.1 | 17.5007 | 88.5598  | -2.3392 | Down | 5.26E-64  | 6.72E-63  |
| Unigene21622  | Potri.006G240300.1 | 5.7155  | 28.9282  | -2.3395 | Down | 1.63E-122 | 4.51E-121 |
| Unigene1845   | Potri.018G113500.1 | 10.2179 | 51.7306  | -2.3399 | Down | 3.63E-79  | 5.89E-78  |
| Unigene43341  | Potri.007G085300.1 | 8.4711  | 42.8907  | -2.34   | Down | 6.10E-161 | 2.39E-159 |
| Unigene48841  | Potri.004G030300.1 | 12.7385 | 64.4937  | -2.34   | Down | 4.76E-98  | 9.93E-97  |
| Unigene118626 | Potri.005G206400.1 | 0.8039  | 4.0705   | -2.3401 | Down | 1.04E-07  | 2.56E-07  |
| Unigene101287 | Potri.001G200400.1 | 1.1269  | 5.7061   | -2.3401 | Down | 1.04E-07  | 2.56E-07  |
| Unigene16578  | Potri.014G152000.3 | 0.9455  | 4.7876   | -2.3402 | Down | 3.91E-14  | 1.37E-13  |

|               |                    |         |         |         |      |           |           |
|---------------|--------------------|---------|---------|---------|------|-----------|-----------|
| Unigene102505 | Potri.013G012100.1 | 1.097   | 5.555   | -2.3402 | Down | 1.04E-07  | 2.56E-07  |
| Unigene107537 | Potri.005G010800.2 | 1.8557  | 9.3965  | -2.3402 | Down | 1.04E-07  | 2.56E-07  |
| Unigene19759  | Potri.004G068100.1 | 1.0219  | 5.1745  | -2.3402 | Down | 1.04E-07  | 2.56E-07  |
| Unigene28432  | Potri.003G115700.1 | 1.6614  | 8.4129  | -2.3402 | Down | 3.91E-14  | 1.37E-13  |
| Unigene47689  | Potri.002G021900.1 | 1.4627  | 7.4067  | -2.3402 | Down | 3.91E-14  | 1.37E-13  |
| Unigene95626  | Potri.001G266200.1 | 1.1993  | 6.073   | -2.3402 | Down | 1.04E-07  | 2.56E-07  |
| Unigene9083   | Potri.001G003400.1 | 5.0633  | 25.6385 | -2.3402 | Down | 1.69E-20  | 7.65E-20  |
| Unigene21331  | Potri.014G195900.1 | 5.4066  | 27.3792 | -2.3403 | Down | 8.65E-170 | 3.65E-168 |
| Unigene24091  | Potri.015G023800.1 | 7.1847  | 36.3973 | -2.3408 | Down | 5.68E-61  | 6.87E-60  |
| Unigene27645  | Potri.011G045900.2 | 2.718   | 13.7689 | -2.3408 | Down | 2.72E-31  | 1.72E-30  |
| Unigene44422  | Potri.015G040100.1 | 1.3949  | 7.0686  | -2.3413 | Down | 1.29E-18  | 5.45E-18  |
| Unigene106623 | Potri.004G104400.1 | 0.6435  | 3.261   | -2.3413 | Down | 1.29E-18  | 5.45E-18  |
| Unigene19019  | Potri.002G111200.1 | 1.3536  | 6.8596  | -2.3413 | Down | 1.29E-18  | 5.45E-18  |
| Unigene33930  | Potri.015G052900.1 | 2.3412  | 11.8664 | -2.3416 | Down | 2.04E-29  | 1.22E-28  |
| Unigene21424  | Potri.002G077400.1 | 1.8235  | 9.2426  | -2.3416 | Down | 2.04E-29  | 1.22E-28  |
| Unigene42542  | Potri.001G336400.1 | 4.3398  | 22.001  | -2.3419 | Down | 5.58E-218 | 3.21E-216 |
| Unigene24404  | Potri.008G171600.2 | 11.8081 | 59.8662 | -2.342  | Down | 5.30E-109 | 1.26E-107 |
| Unigene24081  | Potri.003G005700.2 | 8.1899  | 41.5279 | -2.3422 | Down | 8.34E-60  | 9.88E-59  |
| Unigene25291  | Potri.013G004700.3 | 4.4759  | 22.7046 | -2.3427 | Down | 9.89E-17  | 3.88E-16  |
| Unigene12258  | Potri.001G276900.3 | 1.2364  | 6.272   | -2.3428 | Down | 9.89E-17  | 3.88E-16  |
| Unigene31070  | Potri.011G087000.1 | 7.173   | 36.3915 | -2.343  | Down | 1.93E-36  | 1.39E-35  |
| Unigene12395  | Potri.002G062600.1 | 10.8353 | 54.979  | -2.3431 | Down | 8.05E-139 | 2.60E-137 |
| Unigene50830  | Potri.017G041600.2 | 4.21    | 21.3643 | -2.3433 | Down | 2.26E-69  | 3.15E-68  |
| Unigene28413  | Potri.005G073000.2 | 2.5944  | 13.1655 | -2.3433 | Down | 2.51E-45  | 2.22E-44  |
| Unigene3982   | Potri.001G166800.1 | 5.9165  | 30.0234 | -2.3433 | Down | 2.51E-45  | 2.22E-44  |
| Unigene10198  | Potri.019G038200.6 | 4.5943  | 23.3225 | -2.3438 | Down | 5.15E-39  | 3.94E-38  |
| Unigene73497  | Potri.016G022500.1 | 10.4297 | 52.9454 | -2.3438 | Down | 5.15E-39  | 3.94E-38  |
| Unigene455    | Potri.014G068500.2 | 5.0654  | 25.7152 | -2.3439 | Down | 3.13E-85  | 5.52E-84  |
| Unigene72861  | Potri.011G147400.2 | 14.346  | 72.8357 | -2.344  | Down | 2.46E-52  | 2.52E-51  |
| Unigene48157  | Potri.015G079900.3 | 0.661   | 3.3572  | -2.3445 | Down | 8.85E-06  | 1.88E-05  |
| Unigene5126   | Potri.014G132800.2 | 1.2201  | 6.1968  | -2.3445 | Down | 8.85E-06  | 1.88E-05  |
| Unigene41498  | Potri.005G185400.5 | 1.865   | 9.4722  | -2.3445 | Down | 2.44E-10  | 7.08E-10  |
| Unigene110557 | Potri.005G082500.2 | 1.1656  | 5.9201  | -2.3445 | Down | 8.85E-06  | 1.88E-05  |
| Unigene14648  | Potri.004G199200.2 | 2.146   | 10.8995 | -2.3445 | Down | 7.64E-15  | 2.77E-14  |
| Unigene99572  | Potri.002G206000.1 | 1.0712  | 5.4405  | -2.3445 | Down | 2.54E-19  | 1.10E-18  |
| Unigene116880 | Potri.001G415000.1 | 0.7771  | 3.9468  | -2.3445 | Down | 8.85E-06  | 1.88E-05  |
| Unigene48493  | Potri.001G368800.1 | 0.7038  | 3.5744  | -2.3445 | Down | 8.85E-06  | 1.88E-05  |
| Unigene46280  | Potri.001G070600.1 | 0.7213  | 3.6633  | -2.3445 | Down | 8.85E-06  | 1.88E-05  |
| Unigene117053 | Potri.T108800.1    | 1.5224  | 7.7324  | -2.3446 | Down | 2.44E-10  | 7.08E-10  |

|               |                    |         |          |         |      |           |           |
|---------------|--------------------|---------|----------|---------|------|-----------|-----------|
| Unigene27271  | Potri.019G132300.1 | 1.0199  | 5.1801   | -2.3446 | Down | 8.85E-06  | 1.88E-05  |
| Unigene41909  | Potri.018G060300.1 | 1.0947  | 5.5602   | -2.3446 | Down | 2.44E-10  | 7.08E-10  |
| Unigene40273  | Potri.016G056500.1 | 2.838   | 14.4143  | -2.3446 | Down | 8.67E-24  | 4.37E-23  |
| Unigene74702  | Potri.015G078600.3 | 1.2032  | 6.1111   | -2.3446 | Down | 8.85E-06  | 1.88E-05  |
| Unigene104600 | Potri.012G109600.1 | 1.1063  | 5.6191   | -2.3446 | Down | 8.85E-06  | 1.88E-05  |
| Unigene25841  | Potri.010G189300.3 | 1.9198  | 9.7508   | -2.3446 | Down | 7.64E-15  | 2.76E-14  |
| Unigene30999  | Potri.009G153600.1 | 1.518   | 7.71     | -2.3446 | Down | 2.44E-10  | 7.08E-10  |
| Unigene105033 | Potri.009G071800.1 | 1.0528  | 5.3472   | -2.3446 | Down | 8.85E-06  | 1.88E-05  |
| Unigene55050  | Potri.008G152700.2 | 1.1254  | 5.716    | -2.3446 | Down | 8.85E-06  | 1.88E-05  |
| Unigene36076  | Potri.003G121300.1 | 1.1814  | 6.0005   | -2.3446 | Down | 8.85E-06  | 1.88E-05  |
| Unigene36834  | Potri.002G053000.1 | 0.8703  | 4.4204   | -2.3446 | Down | 8.85E-06  | 1.88E-05  |
| Unigene33934  | Potri.001G343800.3 | 0.9915  | 5.0359   | -2.3446 | Down | 7.64E-15  | 2.76E-14  |
| Unigene23988  | Potri.001G209400.1 | 5.2971  | 26.9084  | -2.3448 | Down | 6.48E-124 | 1.81E-122 |
| Unigene23734  | Potri.014G041400.1 | 3.9227  | 19.9287  | -2.3449 | Down | 3.33E-75  | 5.08E-74  |
| Unigene45428  | Potri.008G169500.2 | 5.1646  | 26.2406  | -2.3451 | Down | 1.37E-155 | 5.14E-154 |
| Unigene35806  | Potri.015G136900.2 | 56.1281 | 285.2122 | -2.3452 | Down | 0         | 0         |
| Unigene2186   | Potri.010G188500.2 | 8.4978  | 43.1904  | -2.3455 | Down | 9.14E-85  | 1.60E-83  |
| Unigene84356  | Potri.005G005400.1 | 35.6895 | 181.4116 | -2.3457 | Down | 2.92E-170 | 1.24E-168 |
| Unigene26374  | Potri.008G190000.1 | 3.4235  | 17.4027  | -2.3458 | Down | 1.84E-116 | 4.78E-115 |
| Unigene4047   | Potri.005G121600.2 | 2.9914  | 15.2079  | -2.3459 | Down | 6.56E-22  | 3.11E-21  |
| Unigene12963  | Potri.003G139400.2 | 17.3586 | 88.2529  | -2.346  | Down | 0.00E+00  | 1.84E-306 |
| Unigene11331  | Potri.005G022500.1 | 2.4025  | 12.2179  | -2.3464 | Down | 1.32E-76  | 2.07E-75  |
| Unigene8654   | Potri.006G120200.1 | 12.6818 | 64.4973  | -2.3465 | Down | 7.35E-45  | 6.43E-44  |
| Unigene28762  | Potri.014G114100.1 | 14.9326 | 75.9514  | -2.3466 | Down | 1.55E-149 | 5.52E-148 |
| Unigene43137  | Potri.013G125700.2 | 2.0117  | 10.2328  | -2.3467 | Down | 2.03E-40  | 1.61E-39  |
| Unigene32066  | Potri.008G080100.2 | 7.6568  | 38.9478  | -2.3467 | Down | 2.42E-179 | 1.10E-177 |
| Unigene33042  | Potri.010G199300.1 | 15.8788 | 80.7729  | -2.3468 | Down | 1.65E-163 | 6.64E-162 |
| Unigene13554  | Potri.006G199500.1 | 6.9986  | 35.6012  | -2.3468 | Down | 1.97E-113 | 4.93E-112 |
| Unigene17966  | Potri.009G106600.2 | 22.0792 | 112.3215 | -2.3469 | Down | 3.99E-216 | 2.27E-214 |
| Unigene74767  | Potri.014G000500.5 | 6.1879  | 31.4815  | -2.347  | Down | 1.71E-24  | 8.83E-24  |
| Unigene40833  | Potri.005G203500.1 | 0.7638  | 3.8859   | -2.347  | Down | 5.96E-13  | 1.98E-12  |
| Unigene46248  | Potri.002G061000.1 | 4.6091  | 23.449   | -2.347  | Down | 5.65E-36  | 4.02E-35  |
| Unigene21284  | Potri.009G131700.1 | 4.5601  | 23.2041  | -2.3472 | Down | 1.51E-125 | 4.29E-124 |
| Unigene25122  | Potri.004G058400.1 | 4.6624  | 23.7344  | -2.3478 | Down | 4.50E-27  | 2.51E-26  |
| Unigene43887  | Potri.016G007500.1 | 11.974  | 60.9628  | -2.348  | Down | 2.40E-145 | 8.23E-144 |
| Unigene53356  | Potri.008G092800.1 | 5.1975  | 26.4608  | -2.348  | Down | 4.21E-34  | 2.85E-33  |
| Unigene347    | Potri.005G187900.1 | 3.1221  | 15.8962  | -2.3481 | Down | 6.20E-134 | 1.92E-132 |
| Unigene366    | Potri.013G041200.1 | 7.9996  | 40.739   | -2.3484 | Down | 5.10E-160 | 1.99E-158 |
| Unigene117850 | Potri.012G028300.3 | 1.0575  | 5.3856   | -2.3484 | Down | 1.98E-08  | 5.15E-08  |

|               |                    |         |          |         |      |           |           |
|---------------|--------------------|---------|----------|---------|------|-----------|-----------|
| Unigene38084  | Potri.006G173600.1 | 26.1327 | 133.0825 | -2.3484 | Down | 4.79E-146 | 1.66E-144 |
| Unigene28216  | Potri.019G039000.1 | 1.5601  | 7.9454   | -2.3485 | Down | 1.98E-08  | 5.15E-08  |
| Unigene247    | Potri.014G039200.1 | 9.7677  | 49.7452  | -2.3485 | Down | 0         | 0         |
| Unigene117494 | Potri.013G084100.5 | 2.2482  | 11.45    | -2.3485 | Down | 1.50E-15  | 5.58E-15  |
| Unigene49602  | Potri.009G053300.8 | 2.0566  | 10.4743  | -2.3485 | Down | 1.50E-15  | 5.58E-15  |
| Unigene28472  | Potri.009G013600.1 | 28.1024 | 143.1254 | -2.3485 | Down | 1.12E-106 | 2.59E-105 |
| Unigene118213 | Potri.008G016900.1 | 0.9863  | 5.0232   | -2.3485 | Down | 1.98E-08  | 5.15E-08  |
| Unigene36109  | Potri.007G098900.3 | 4.8081  | 24.4879  | -2.3485 | Down | 1.29E-22  | 6.27E-22  |
| Unigene37194  | Potri.001G353800.1 | 1.6885  | 8.5993   | -2.3485 | Down | 1.98E-08  | 5.15E-08  |
| Unigene44676  | Potri.016G072600.1 | 4.9375  | 25.1519  | -2.3488 | Down | 2.83E-60  | 3.38E-59  |
| Unigene3241   | Potri.014G168600.2 | 15.8749 | 80.871   | -2.3489 | Down | 0         | 0         |
| Unigene52425  | Potri.014G072400.3 | 6.9136  | 35.2195  | -2.3489 | Down | 2.86E-53  | 2.98E-52  |
| Unigene118938 | Potri.011G126900.1 | 2.6188  | 13.3442  | -2.3492 | Down | 3.38E-25  | 1.78E-24  |
| Unigene72714  | Potri.005G244700.1 | 55.232  | 281.4896 | -2.3495 | Down | 9.72E-198 | 4.98E-196 |
| Unigene16482  | Potri.002G149200.1 | 4.0577  | 20.6811  | -2.3496 | Down | 3.81E-18  | 1.58E-17  |
| Unigene32502  | Potri.006G228900.2 | 5.6408  | 28.7526  | -2.3497 | Down | 1.20E-103 | 2.67E-102 |
| Unigene74690  | Potri.001G304000.1 | 27.502  | 140.1853 | -2.3497 | Down | 1.20E-103 | 2.67E-102 |
| Unigene19775  | Potri.019G100600.2 | 6.1294  | 31.2462  | -2.3499 | Down | 5.69E-54  | 6.02E-53  |
| Unigene34582  | Potri.006G054800.1 | 1.1917  | 6.077    | -2.3503 | Down | 9.82E-21  | 4.48E-20  |
| Unigene50156  | Potri.006G046500.1 | 17.0301 | 86.8519  | -2.3505 | Down | 5.00E-119 | 1.33E-117 |
| Unigene21666  | Potri.004G232500.1 | 2.6018  | 13.271   | -2.3507 | Down | 8.29E-74  | 1.24E-72  |
| Unigene84635  | Potri.002G082700.2 | 17.0512 | 86.9723  | -2.3507 | Down | 2.28E-83  | 3.90E-82  |
| Unigene2264   | Potri.017G138500.3 | 6.7318  | 34.3387  | -2.3508 | Down | 3.05E-64  | 3.90E-63  |
| Unigene10955  | Potri.012G027700.1 | 9.076   | 46.2965  | -2.3508 | Down | 1.64E-251 | 1.14E-249 |
| Unigene9556   | Potri.005G091700.2 | 3.73    | 19.0265  | -2.3508 | Down | 6.23E-33  | 4.10E-32  |
| Unigene42556  | Potri.002G139400.1 | 2.6878  | 13.7102  | -2.3508 | Down | 6.23E-33  | 4.10E-32  |
| Unigene50243  | Potri.016G101000.1 | 1.8493  | 9.4354   | -2.3511 | Down | 1.66E-35  | 1.16E-34  |
| Unigene9142   | Potri.001G387500.3 | 3.3735  | 17.2124  | -2.3511 | Down | 1.66E-35  | 1.16E-34  |
| Unigene9283   | Potri.010G078400.3 | 9.2539  | 47.2191  | -2.3512 | Down | 9.54E-106 | 2.18E-104 |
| Unigene10992  | Potri.001G165800.1 | 8.2558  | 42.1292  | -2.3513 | Down | 9.78E-215 | 5.52E-213 |
| Unigene119274 | Potri.015G073200.1 | 1.0836  | 5.5301   | -2.3515 | Down | 1.16E-13  | 3.99E-13  |
| Unigene33040  | Potri.009G115400.6 | 1.2114  | 6.1823   | -2.3515 | Down | 1.16E-13  | 3.99E-13  |
| Unigene80764  | Potri.001G075600.1 | 26.1097 | 133.2541 | -2.3515 | Down | 1.95E-113 | 4.88E-112 |
| Unigene22107  | Potri.009G065000.1 | 3.3415  | 17.0551  | -2.3516 | Down | 6.97E-104 | 1.56E-102 |
| Unigene50789  | Potri.006G076200.1 | 7.498   | 38.2684  | -2.3516 | Down | 4.50E-77  | 7.06E-76  |
| Unigene38871  | Potri.015G046200.1 | 2.6643  | 13.6031  | -2.3521 | Down | 2.93E-16  | 1.13E-15  |
| Unigene24750  | Potri.003G153300.1 | 1.2672  | 6.47     | -2.3521 | Down | 2.93E-16  | 1.13E-15  |
| Unigene103588 | Potri.012G110700.1 | 2.2695  | 11.5878  | -2.3522 | Down | 2.93E-16  | 1.13E-15  |
| Unigene4322   | Potri.015G132100.3 | 4.6977  | 23.9897  | -2.3524 | Down | 1.24E-33  | 8.27E-33  |

|               |                    |         |          |         |      |           |           |
|---------------|--------------------|---------|----------|---------|------|-----------|-----------|
| Unigene41267  | Potri.014G001100.4 | 17.7664 | 90.734   | -2.3525 | Down | 2.13E-117 | 5.57E-116 |
| Unigene16994  | Potri.005G229300.1 | 4.0445  | 20.6575  | -2.3526 | Down | 3.29E-36  | 2.36E-35  |
| Unigene32603  | Potri.003G162500.2 | 5.7031  | 29.1308  | -2.3527 | Down | 6.92E-145 | 2.36E-143 |
| Unigene12913  | Potri.010G046300.1 | 13.766  | 70.3395  | -2.3532 | Down | 7.82E-156 | 2.95E-154 |
| Unigene11494  | Potri.006G004700.1 | 12.5575 | 64.1624  | -2.3532 | Down | 2.41E-66  | 3.21E-65  |
| Unigene12950  | Potri.014G123800.1 | 2.1366  | 10.9177  | -2.3533 | Down | 5.04E-24  | 2.56E-23  |
| Unigene52753  | Potri.006G175200.1 | 4.7458  | 24.2548  | -2.3535 | Down | 3.57E-79  | 5.80E-78  |
| Unigene19285  | Potri.011G106800.1 | 4.1768  | 21.3484  | -2.3537 | Down | 3.49E-29  | 2.07E-28  |
| Unigene118793 | Potri.017G008300.1 | 3.8664  | 19.7659  | -2.354  | Down | 2.45E-34  | 1.67E-33  |
| Unigene33929  | Potri.013G110800.1 | 4.4102  | 22.5488  | -2.3541 | Down | 1.74E-39  | 1.35E-38  |
| Unigene119474 | Potri.010G074700.1 | 2.7484  | 14.0531  | -2.3542 | Down | 4.67E-42  | 3.84E-41  |
| Unigene44540  | Potri.013G108200.1 | 3.3111  | 16.9337  | -2.3545 | Down | 6.59E-55  | 7.10E-54  |
| Unigene59732  | Potri.006G180800.1 | 5.4099  | 27.6695  | -2.3546 | Down | 1.30E-62  | 1.62E-61  |
| Unigene21745  | Potri.010G074800.6 | 24.5838 | 125.7575 | -2.3549 | Down | 0         | 0         |
| Unigene9530   | Potri.001G050700.4 | 52.2418 | 267.2558 | -2.3549 | Down | 1.82E-299 | 1.61E-297 |
| Unigene47367  | Potri.019G080100.1 | 0.7711  | 3.9458   | -2.3553 | Down | 1.66E-06  | 3.76E-06  |
| Unigene4086   | Potri.T064300.1    | 10.2057 | 52.2277  | -2.3554 | Down | 1.31E-55  | 1.44E-54  |
| Unigene41523  | Potri.017G151600.2 | 3.7207  | 19.0404  | -2.3554 | Down | 2.62E-27  | 1.47E-26  |
| Unigene88260  | Potri.016G127700.1 | 2.2606  | 11.5685  | -2.3554 | Down | 2.27E-14  | 8.03E-14  |
| Unigene25326  | Potri.013G144000.1 | 11.9359 | 61.0815  | -2.3554 | Down | 9.28E-43  | 7.76E-42  |
| Unigene111994 | Potri.012G124300.1 | 1.2538  | 6.4161   | -2.3554 | Down | 1.66E-06  | 3.76E-06  |
| Unigene106681 | Potri.012G059300.5 | 0.7269  | 3.7199   | -2.3554 | Down | 9.14E-12  | 2.86E-11  |
| Unigene12906  | Potri.011G032300.2 | 0.8468  | 4.3333   | -2.3554 | Down | 2.27E-14  | 8.03E-14  |
| Unigene22855  | Potri.010G055600.1 | 0.9015  | 4.6134   | -2.3554 | Down | 9.14E-12  | 2.86E-11  |
| Unigene116514 | Potri.005G042800.1 | 0.9267  | 4.7424   | -2.3554 | Down | 1.66E-06  | 3.76E-06  |
| Unigene41427  | Potri.019G056400.6 | 1.7248  | 8.8268   | -2.3555 | Down | 9.14E-12  | 2.86E-11  |
| Unigene16649  | Potri.015G104400.2 | 1.089   | 5.5731   | -2.3555 | Down | 1.66E-06  | 3.76E-06  |
| Unigene20316  | Potri.010G168900.1 | 1.5381  | 7.8713   | -2.3555 | Down | 2.27E-14  | 8.03E-14  |
| Unigene98001  | Potri.004G169500.1 | 1.4675  | 7.51     | -2.3555 | Down | 3.79E-09  | 1.03E-08  |
| Unigene39082  | Potri.003G220800.1 | 2.2836  | 11.6865  | -2.3555 | Down | 5.74E-17  | 2.28E-16  |
| Unigene118633 | Potri.003G102200.1 | 0.6417  | 3.284    | -2.3555 | Down | 1.66E-06  | 3.76E-06  |
| Unigene34176  | Potri.002G059000.2 | 1.5788  | 8.0796   | -2.3555 | Down | 3.82E-22  | 1.82E-21  |
| Unigene119360 | Potri.001G405200.2 | 2.511   | 12.8502  | -2.3555 | Down | 1.83E-32  | 1.19E-31  |
| Unigene14145  | Potri.013G115100.1 | 31.7737 | 162.6261 | -2.3557 | Down | 6.83E-223 | 4.02E-221 |
| Unigene93819  | Potri.001G061200.1 | 39.4801 | 202.1007 | -2.3559 | Down | 0         | 0         |
| Unigene74116  | Potri.008G157000.1 | 12.7237 | 65.1601  | -2.3565 | Down | 1.33E-48  | 1.26E-47  |
| Unigene24661  | Potri.003G115300.2 | 8.8747  | 45.4509  | -2.3565 | Down | 4.95E-46  | 4.45E-45  |
| Unigene31809  | Potri.014G072900.1 | 2.3782  | 12.1814  | -2.3567 | Down | 2.57E-38  | 1.94E-37  |
| Unigene24021  | Potri.009G008200.1 | 3.9518  | 20.242   | -2.3568 | Down | 2.57E-38  | 1.94E-37  |

|               |                    |         |          |         |      |           |           |
|---------------|--------------------|---------|----------|---------|------|-----------|-----------|
| Unigene46340  | Potri.014G184800.1 | 9.6669  | 49.5192  | -2.3569 | Down | 7.60E-70  | 1.06E-68  |
| Unigene12997  | Potri.013G119400.1 | 2.7765  | 14.2229  | -2.3569 | Down | 9.65E-36  | 6.82E-35  |
| Unigene2917   | Potri.004G033900.2 | 3.2092  | 16.4394  | -2.3569 | Down | 9.65E-36  | 6.82E-35  |
| Unigene33375  | Potri.003G058300.1 | 2.9862  | 15.2971  | -2.3569 | Down | 9.65E-36  | 6.82E-35  |
| Unigene22334  | Potri.010G131900.1 | 1.1465  | 5.8741   | -2.3571 | Down | 1.37E-30  | 8.43E-30  |
| Unigene32297  | Potri.010G045200.1 | 13.4913 | 69.1332  | -2.3573 | Down | 4.82E-231 | 2.97E-229 |
| Unigene9899   | Potri.010G229000.2 | 4.0591  | 20.8018  | -2.3575 | Down | 1.97E-25  | 1.04E-24  |
| Unigene48916  | Potri.002G260800.1 | 10.5985 | 54.3163  | -2.3575 | Down | 4.20E-118 | 1.11E-116 |
| Unigene11661  | Potri.018G066600.1 | 11.9568 | 61.2786  | -2.3576 | Down | 4.65E-163 | 1.86E-161 |
| Unigene66020  | Potri.007G038100.1 | 2.9016  | 14.8741  | -2.3579 | Down | 1.37E-41  | 1.11E-40  |
| Unigene42593  | Potri.001G329700.1 | 11.964  | 61.3545  | -2.3585 | Down | 4.86E-275 | 3.81E-273 |
| Unigene39158  | Potri.016G137700.1 | 4.6879  | 24.0452  | -2.3587 | Down | 2.71E-31  | 1.70E-30  |
| Unigene9801   | Potri.003G196600.1 | 1.545   | 7.9261   | -2.359  | Down | 4.43E-15  | 1.62E-14  |
| Unigene95684  | Potri.001G275500.1 | 1.9058  | 9.7774   | -2.3591 | Down | 4.43E-15  | 1.62E-14  |
| Unigene11984  | Potri.010G149600.1 | 9.4704  | 48.5902  | -2.3592 | Down | 7.19E-159 | 2.78E-157 |
| Unigene13371  | Potri.013G068300.3 | 28.4246 | 145.897  | -2.3597 | Down | 1.09E-296 | 9.51E-295 |
| Unigene18678  | Potri.011G076700.2 | 4.8392  | 24.8375  | -2.3597 | Down | 4.11E-59  | 4.82E-58  |
| Unigene9824   | Potri.019G034800.6 | 1.6599  | 8.5209   | -2.3599 | Down | 1.78E-12  | 5.77E-12  |
| Unigene41549  | Potri.017G058700.1 | 2.8499  | 14.6292  | -2.3599 | Down | 1.48E-23  | 7.42E-23  |
| Unigene4006   | Potri.014G181400.1 | 2.135   | 10.9596  | -2.3599 | Down | 1.78E-12  | 5.77E-12  |
| Unigene48485  | Potri.010G012800.4 | 8.0605  | 41.3771  | -2.3599 | Down | 1.43E-34  | 9.76E-34  |
| Unigene13831  | Potri.008G091700.1 | 1.8705  | 9.6018   | -2.3599 | Down | 1.45E-45  | 1.29E-44  |
| Unigene26186  | Potri.003G215700.1 | 3.2855  | 16.8653  | -2.3599 | Down | 1.48E-23  | 7.42E-23  |
| Unigene21529  | Potri.017G121500.1 | 2.1496  | 11.0366  | -2.3602 | Down | 2.88E-95  | 5.80E-94  |
| Unigene1896   | Potri.019G038200.8 | 5.4478  | 27.9754  | -2.3604 | Down | 3.88E-90  | 7.27E-89  |
| Unigene26199  | Potri.002G006600.1 | 10.5591 | 54.2205  | -2.3604 | Down | 2.09E-51  | 2.10E-50  |
| Unigene48778  | Potri.019G097000.3 | 4.4581  | 22.8944  | -2.3605 | Down | 2.02E-40  | 1.60E-39  |
| Unigene106867 | Potri.006G114600.2 | 1.3057  | 6.7053   | -2.3605 | Down | 5.71E-21  | 2.62E-20  |
| Unigene13241  | Potri.005G208600.3 | 9.0098  | 46.2708  | -2.3605 | Down | 2.92E-126 | 8.35E-125 |
| Unigene25827  | Potri.008G118600.1 | 7.94    | 40.782   | -2.3607 | Down | 2.03E-29  | 1.21E-28  |
| Unigene40085  | Potri.001G070200.1 | 3.1552  | 16.2076  | -2.3609 | Down | 7.54E-38  | 5.62E-37  |
| Unigene27775  | Potri.001G184700.1 | 0.9047  | 4.6483   | -2.3612 | Down | 7.30E-10  | 2.07E-09  |
| Unigene20837  | Potri.006G096600.1 | 0.6679  | 3.4318   | -2.3613 | Down | 7.30E-10  | 2.07E-09  |
| Unigene118963 | Potri.003G136800.1 | 0.908   | 4.6657   | -2.3613 | Down | 7.30E-10  | 2.07E-09  |
| Unigene92831  | Potri.001G215700.2 | 0.9526  | 4.8949   | -2.3613 | Down | 7.30E-10  | 2.07E-09  |
| Unigene90008  | Potri.005G185100.1 | 14.9198 | 76.6777  | -2.3616 | Down | 2.29E-97  | 4.74E-96  |
| Unigene90293  | Potri.007G046200.3 | 31.4777 | 161.8039 | -2.3618 | Down | 8.97E-208 | 4.87E-206 |
| Unigene24003  | Potri.011G168600.1 | 1.5921  | 8.1841   | -2.3619 | Down | 2.93E-24  | 1.50E-23  |
| Unigene43630  | Potri.010G013600.1 | 2.1978  | 11.2979  | -2.3619 | Down | 5.73E-47  | 5.25E-46  |

|               |                    |          |          |         |      |           |           |
|---------------|--------------------|----------|----------|---------|------|-----------|-----------|
| Unigene32599  | Potri.014G035700.1 | 5.0838   | 26.1353  | -2.362  | Down | 3.25E-61  | 3.95E-60  |
| Unigene93319  | Potri.001G024100.1 | 25.0658  | 128.8649 | -2.3621 | Down | 2.96E-245 | 1.99E-243 |
| Unigene116803 | Potri.013G094800.1 | 2.4717   | 12.7092  | -2.3623 | Down | 8.67E-16  | 3.27E-15  |
| Unigene20093  | Potri.008G140400.1 | 2.6471   | 13.6111  | -2.3623 | Down | 8.67E-16  | 3.27E-15  |
| Unigene107160 | Potri.007G127600.1 | 1.3088   | 6.7296   | -2.3623 | Down | 8.67E-16  | 3.27E-15  |
| Unigene103484 | Potri.003G220800.1 | 2.3246   | 11.9531  | -2.3623 | Down | 8.67E-16  | 3.27E-15  |
| Unigene11733  | Potri.012G131500.1 | 1.5107   | 7.7711   | -2.3629 | Down | 1.14E-47  | 1.06E-46  |
| Unigene33149  | Potri.014G155300.1 | 1.2199   | 6.2759   | -2.3631 | Down | 1.52E-27  | 8.59E-27  |
| Unigene43961  | Potri.001G299400.1 | 1.6359   | 8.416    | -2.3631 | Down | 1.52E-27  | 8.59E-27  |
| Unigene13001  | Potri.018G038300.1 | 4.4275   | 22.7865  | -2.3636 | Down | 8.98E-92  | 1.72E-90  |
| Unigene54491  | Potri.T106600.2    | 1.447    | 7.4481   | -2.3638 | Down | 3.14E-07  | 7.51E-07  |
| Unigene118909 | Potri.019G099100.2 | 0.6456   | 3.323    | -2.3638 | Down | 3.14E-07  | 7.51E-07  |
| Unigene99643  | Potri.018G005900.2 | 0.8564   | 4.4081   | -2.3638 | Down | 3.14E-07  | 7.51E-07  |
| Unigene10129  | Potri.016G138000.3 | 1.059    | 5.451    | -2.3638 | Down | 3.46E-13  | 1.16E-12  |
| Unigene1537   | Potri.014G144100.1 | 6.7364   | 34.6749  | -2.3638 | Down | 1.11E-36  | 8.06E-36  |
| Unigene60292  | Potri.013G083400.1 | 1.0051   | 5.1735   | -2.3638 | Down | 3.14E-07  | 7.51E-07  |
| Unigene28282  | Potri.008G036500.3 | 0.7862   | 4.0468   | -2.3638 | Down | 3.14E-07  | 7.51E-07  |
| Unigene37995  | Potri.007G024200.1 | 0.9      | 4.6326   | -2.3638 | Down | 3.14E-07  | 7.51E-07  |
| Unigene95028  | Potri.006G076200.1 | 2.0022   | 10.3059  | -2.3638 | Down | 4.35E-19  | 1.87E-18  |
| Unigene9073   | Potri.002G258800.1 | 1.0021   | 5.1581   | -2.3638 | Down | 3.14E-07  | 7.51E-07  |
| Unigene13309  | Potri.011G147400.2 | 3.3055   | 17.015   | -2.3639 | Down | 3.28E-54  | 3.48E-53  |
| Unigene6349   | Potri.010G190100.2 | 0.7612   | 3.9183   | -2.3639 | Down | 3.14E-07  | 7.51E-07  |
| Unigene50954  | Potri.004G147700.1 | 0.8299   | 4.2719   | -2.3639 | Down | 3.46E-13  | 1.16E-12  |
| Unigene90063  | Potri.003G219000.1 | 22.1591  | 114.0741 | -2.364  | Down | 6.66E-145 | 2.28E-143 |
| Unigene8581   | Potri.011G136300.1 | 5.1578   | 26.5643  | -2.3647 | Down | 6.52E-55  | 7.02E-54  |
| Unigene84664  | Potri.007G130900.1 | 5.4423   | 28.0295  | -2.3647 | Down | 3.01E-28  | 1.73E-27  |
| Unigene42169  | Potri.001G147600.3 | 5.7927   | 29.8345  | -2.3647 | Down | 3.01E-28  | 1.73E-27  |
| Unigene21571  | Potri.018G147500.1 | 18.4221  | 94.8879  | -2.3648 | Down | 0         | 0         |
| Unigene44179  | Potri.003G128500.4 | 9.0241   | 46.4815  | -2.3648 | Down | 6.47E-138 | 2.08E-136 |
| Unigene70653  | Potri.013G140500.1 | 161.3206 | 831.0301 | -2.365  | Down | 0         | 0         |
| Unigene44166  | Potri.018G107400.1 | 1.6372   | 8.4358   | -2.3653 | Down | 1.70E-16  | 6.60E-16  |
| Unigene2485   | Potri.010G234700.1 | 1.1041   | 5.689    | -2.3653 | Down | 1.70E-16  | 6.60E-16  |
| Unigene119388 | Potri.009G089500.1 | 1.1752   | 6.0553   | -2.3653 | Down | 1.70E-16  | 6.60E-16  |
| Unigene7559   | Potri.001G087400.1 | 4.0088   | 20.6559  | -2.3653 | Down | 1.68E-46  | 1.52E-45  |
| Unigene39215  | Potri.005G255500.1 | 10.2484  | 52.8313  | -2.366  | Down | 1.88E-113 | 4.71E-112 |
| Unigene3544   | Potri.006G113600.2 | 24.0439  | 123.9559 | -2.3661 | Down | 1.15E-273 | 8.92E-272 |
| Unigene19385  | Potri.018G147400.4 | 1.8259   | 9.414    | -2.3662 | Down | 1.41E-10  | 4.15E-10  |
| Unigene37011  | Potri.017G130600.1 | 1.6684   | 8.6019   | -2.3662 | Down | 1.41E-10  | 4.15E-10  |
| Unigene16001  | Potri.007G004100.1 | 30.4224  | 156.8479 | -2.3662 | Down | 3.17E-171 | 1.35E-169 |



|               |                    |          |          |         |      |           |           |
|---------------|--------------------|----------|----------|---------|------|-----------|-----------|
| Unigene48868  | Potri.006G241900.1 | 10.1561  | 52.3645  | -2.3662 | Down | 6.87E-111 | 1.68E-109 |
| Unigene16580  | Potri.004G162500.1 | 1.4307   | 7.3765   | -2.3662 | Down | 1.41E-10  | 4.15E-10  |
| Unigene74830  | Potri.012G108200.1 | 34.5494  | 178.1482 | -2.3663 | Down | 2.51E-132 | 7.64E-131 |
| Unigene90447  | Potri.011G151500.1 | 40.1312  | 206.9222 | -2.3663 | Down | 1.51E-268 | 1.15E-266 |
| Unigene895    | Potri.018G121600.2 | 7.7633   | 40.041   | -2.3667 | Down | 7.49E-115 | 1.91E-113 |
| Unigene22910  | Potri.012G011700.2 | 8.4806   | 43.7428  | -2.3668 | Down | 3.22E-75  | 4.92E-74  |
| Unigene74335  | Potri.009G069700.1 | 14.7463  | 76.0715  | -2.367  | Down | 5.14E-57  | 5.79E-56  |
| Unigene9753   | Potri.007G024100.1 | 14.354   | 74.0491  | -2.367  | Down | 7.63E-91  | 1.45E-89  |
| Unigene38076  | Potri.010G023800.1 | 9.4154   | 48.5734  | -2.3671 | Down | 2.19E-69  | 3.05E-68  |
| Unigene73631  | Potri.007G097100.2 | 70.0246  | 361.2877 | -2.3672 | Down | 2.11E-260 | 1.54E-258 |
| Unigene19964  | Potri.005G185600.1 | 4.6344   | 23.9178  | -2.3676 | Down | 4.62E-42  | 3.80E-41  |
| Unigene35272  | Potri.011G126800.1 | 4.2832   | 22.1115  | -2.368  | Down | 3.33E-17  | 1.33E-16  |
| Unigene42917  | Potri.007G071500.1 | 1.192    | 6.1535   | -2.368  | Down | 3.33E-17  | 1.33E-16  |
| Unigene106523 | Potri.005G259700.1 | 1.2313   | 6.3567   | -2.3681 | Down | 3.33E-17  | 1.33E-16  |
| Unigene92206  | Potri.010G128600.1 | 25.3249  | 130.7545 | -2.3682 | Down | 1.84E-205 | 9.90E-204 |
| Unigene2112   | Potri.006G139800.2 | 15.0801  | 77.8588  | -2.3682 | Down | 1.60E-136 | 5.06E-135 |
| Unigene31908  | Potri.010G008600.1 | 4.9733   | 25.6786  | -2.3683 | Down | 3.56E-124 | 9.98E-123 |
| Unigene17948  | Potri.014G127700.1 | 11.7575  | 60.7146  | -2.3685 | Down | 3.30E-96  | 6.71E-95  |
| Unigene1601   | Potri.002G124300.1 | 13.8581  | 71.5641  | -2.3685 | Down | 8.07E-194 | 4.04E-192 |
| Unigene32935  | Potri.014G129400.1 | 23.64    | 122.0861 | -2.3686 | Down | 0         | 0         |
| Unigene100923 | Potri.001G002000.1 | 123.2661 | 636.5847 | -2.3686 | Down | 0         | 0         |
| Unigene93466  | Potri.015G000900.2 | 45.041   | 232.6331 | -2.3687 | Down | 0         | 0         |
| Unigene50422  | Potri.010G002800.2 | 1.7837   | 9.2126   | -2.3687 | Down | 8.61E-24  | 4.34E-23  |
| Unigene77211  | Potri.006G117400.3 | 42.6512  | 220.3198 | -2.3689 | Down | 4.28E-173 | 1.85E-171 |
| Unigene47845  | Potri.015G007400.1 | 5.6824   | 29.354   | -2.369  | Down | 4.46E-27  | 2.49E-26  |
| Unigene42815  | Potri.001G167200.1 | 3.8733   | 20.0105  | -2.3691 | Down | 1.50E-84  | 2.62E-83  |
| Unigene17781  | Potri.001G098600.3 | 2.8742   | 14.8495  | -2.3692 | Down | 2.33E-30  | 1.43E-29  |
| Unigene21342  | Potri.011G076700.1 | 2.3784   | 12.291   | -2.3695 | Down | 5.51E-82  | 9.27E-81  |
| Unigene84510  | Potri.003G202800.1 | 15.107   | 78.0659  | -2.3695 | Down | 1.87E-75  | 2.87E-74  |
| Unigene16263  | Potri.003G009700.3 | 7.8705   | 40.6768  | -2.3697 | Down | 9.73E-47  | 8.88E-46  |
| Unigene16980  | Potri.014G114100.1 | 11.5802  | 59.8573  | -2.3699 | Down | 6.84E-176 | 3.01E-174 |
| Unigene52351  | Potri.010G121500.2 | 6.7887   | 35.0901  | -2.3699 | Down | 8.08E-60  | 9.58E-59  |
| Unigene9445   | Potri.001G320500.3 | 18.2399  | 94.2807  | -2.3699 | Down | 6.92E-118 | 1.82E-116 |
| Unigene52330  | Potri.001G003800.1 | 10.9199  | 56.4444  | -2.3699 | Down | 8.08E-60  | 9.58E-59  |
| Unigene107085 | Potri.003G155200.1 | 7.1389   | 36.906   | -2.3701 | Down | 5.97E-86  | 1.06E-84  |
| Unigene51894  | Potri.017G141900.3 | 0.6661   | 3.4444   | -2.3704 | Down | 1.49E-04  | 2.80E-04  |
| Unigene114901 | Potri.010G229100.2 | 0.6709   | 3.4692   | -2.3704 | Down | 1.49E-04  | 2.80E-04  |
| Unigene97171  | Potri.018G041800.1 | 1.8284   | 9.4553   | -2.3705 | Down | 3.31E-21  | 1.53E-20  |
| Unigene40926  | Potri.016G010300.1 | 1.0627   | 5.4954   | -2.3705 | Down | 5.97E-08  | 1.50E-07  |

|               |                    |         |         |         |      |           |           |
|---------------|--------------------|---------|---------|---------|------|-----------|-----------|
| Unigene76350  | Potri.015G121300.1 | 0.8289  | 4.2864  | -2.3705 | Down | 1.49E-04  | 2.80E-04  |
| Unigene46336  | Potri.014G097800.2 | 11.1996 | 57.9171 | -2.3705 | Down | 7.44E-77  | 1.17E-75  |
| Unigene116422 | Potri.014G042600.2 | 2.3459  | 12.1314 | -2.3705 | Down | 1.31E-14  | 4.71E-14  |
| Unigene113764 | Potri.013G158900.1 | 0.7201  | 3.7237  | -2.3705 | Down | 1.49E-04  | 2.80E-04  |
| Unigene117391 | Potri.013G141200.1 | 1.039   | 5.373   | -2.3705 | Down | 5.97E-08  | 1.50E-07  |
| Unigene5829   | Potri.012G070000.4 | 0.8091  | 4.1841  | -2.3705 | Down | 5.97E-08  | 1.50E-07  |
| Unigene51682  | Potri.010G174200.1 | 1.039   | 5.373   | -2.3705 | Down | 5.97E-08  | 1.50E-07  |
| Unigene96147  | Potri.010G130400.1 | 0.5902  | 3.052   | -2.3705 | Down | 1.49E-04  | 2.80E-04  |
| Unigene113656 | Potri.010G117700.1 | 0.7229  | 3.7382  | -2.3705 | Down | 1.49E-04  | 2.80E-04  |
| Unigene109971 | Potri.008G098200.1 | 0.8516  | 4.4039  | -2.3705 | Down | 1.49E-04  | 2.80E-04  |
| Unigene100158 | Potri.007G131100.1 | 1.0507  | 5.4335  | -2.3705 | Down | 5.97E-08  | 1.50E-07  |
| Unigene2292   | Potri.007G052900.1 | 3.2563  | 16.8395 | -2.3705 | Down | 1.28E-37  | 9.50E-37  |
| Unigene38791  | Potri.002G109000.3 | 1.2297  | 6.359   | -2.3705 | Down | 2.73E-11  | 8.35E-11  |
| Unigene26845  | Potri.001G317200.2 | 0.6882  | 3.5588  | -2.3705 | Down | 1.49E-04  | 2.80E-04  |
| Unigene107758 | Potri.T004100.1    | 1.8374  | 9.5019  | -2.3706 | Down | 5.97E-08  | 1.50E-07  |
| Unigene1985   | Potri.017G114100.2 | 1.4485  | 7.4908  | -2.3706 | Down | 8.82E-28  | 5.02E-27  |
| Unigene20505  | Potri.016G024300.2 | 1.984   | 10.2601 | -2.3706 | Down | 3.31E-21  | 1.53E-20  |
| Unigene114803 | Potri.015G064000.1 | 0.6757  | 3.4944  | -2.3706 | Down | 1.49E-04  | 2.80E-04  |
| Unigene82491  | Potri.010G138300.6 | 0.7118  | 3.6811  | -2.3706 | Down | 1.49E-04  | 2.80E-04  |
| Unigene109633 | Potri.009G124000.1 | 0.8634  | 4.465   | -2.3706 | Down | 1.49E-04  | 2.80E-04  |
| Unigene117466 | Potri.003G144900.2 | 1.0275  | 5.3137  | -2.3706 | Down | 5.97E-08  | 1.50E-07  |
| Unigene102600 | Potri.003G067600.2 | 0.7091  | 3.6671  | -2.3706 | Down | 1.49E-04  | 2.80E-04  |
| Unigene32890  | Potri.002G169900.3 | 2.2114  | 11.4361 | -2.3706 | Down | 4.61E-31  | 2.88E-30  |
| Unigene10760  | Potri.016G133900.1 | 17.519  | 90.6258 | -2.371  | Down | 0         | 0         |
| Unigene2612   | Potri.010G151600.1 | 3.6901  | 19.0898 | -2.3711 | Down | 2.74E-74  | 4.11E-73  |
| Unigene11836  | Potri.014G100400.2 | 1.7344  | 8.9736  | -2.3713 | Down | 1.11E-54  | 1.19E-53  |
| Unigene8848   | Potri.009G096400.2 | 8.6263  | 44.6357 | -2.3714 | Down | 3.85E-48  | 3.62E-47  |
| Unigene76642  | Potri.001G241700.1 | 11.6664 | 60.3663 | -2.3714 | Down | 3.85E-48  | 3.62E-47  |
| Unigene45181  | Potri.008G185100.2 | 4.8012  | 24.8467 | -2.3716 | Down | 7.37E-115 | 1.88E-113 |
| Unigene35300  | Potri.002G050800.3 | 7.6705  | 39.6991 | -2.3717 | Down | 4.81E-35  | 3.33E-34  |
| Unigene26451  | Potri.015G136900.2 | 14.4579 | 74.8403 | -2.372  | Down | 2.69E-112 | 6.67E-111 |
| Unigene90589  | Potri.010G078400.3 | 11.8549 | 61.3681 | -2.372  | Down | 3.20E-82  | 5.40E-81  |
| Unigene25679  | Potri.006G231000.3 | 6.3588  | 32.9168 | -2.372  | Down | 2.20E-55  | 2.40E-54  |
| Unigene20082  | Potri.001G123800.3 | 2.004   | 10.3771 | -2.3724 | Down | 6.52E-22  | 3.09E-21  |
| Unigene19826  | Potri.015G000400.1 | 1.1172  | 5.7851  | -2.3725 | Down | 6.52E-22  | 3.09E-21  |
| Unigene65518  | Potri.006G067000.1 | 3.0834  | 15.9669 | -2.3725 | Down | 2.68E-42  | 2.22E-41  |
| Unigene39244  | Potri.007G058500.1 | 4.4658  | 23.127  | -2.3726 | Down | 2.36E-59  | 2.77E-58  |
| Unigene17866  | Potri.004G085600.4 | 16.8869 | 87.4678 | -2.3728 | Down | 6.40E-121 | 1.74E-119 |
| Unigene33064  | Potri.005G125400.1 | 2.1174  | 10.9676 | -2.3729 | Down | 9.53E-36  | 6.74E-35  |

|               |                    |          |          |         |      |           |           |
|---------------|--------------------|----------|----------|---------|------|-----------|-----------|
| Unigene50079  | Potri.001G421300.1 | 5.7798   | 29.9398  | -2.373  | Down | 2.14E-114 | 5.44E-113 |
| Unigene31734  | Potri.017G136000.1 | 36.7075  | 190.1735 | -2.3732 | Down | 8.49E-286 | 7.06E-284 |
| Unigene22314  | Potri.014G028100.1 | 9.2298   | 47.82    | -2.3732 | Down | 1.34E-176 | 5.96E-175 |
| Unigene28487  | Potri.002G050900.1 | 23.3905  | 121.182  | -2.3732 | Down | 0         | 0         |
| Unigene5764   | Potri.011G118200.3 | 15.2095  | 78.8098  | -2.3734 | Down | 8.72E-57  | 9.77E-56  |
| Unigene49536  | Potri.010G029500.5 | 7.9388   | 41.1355  | -2.3734 | Down | 5.33E-43  | 4.48E-42  |
| Unigene8417   | Potri.006G143300.3 | 1.7406   | 9.0193   | -2.3734 | Down | 2.57E-15  | 9.48E-15  |
| Unigene50861  | Potri.015G091100.1 | 2.4297   | 12.5933  | -2.3738 | Down | 6.63E-26  | 3.56E-25  |
| Unigene95577  | Potri.005G154900.1 | 115.4336 | 598.4444 | -2.3742 | Down | 0         | 0         |
| Unigene117422 | Potri.002G261000.3 | 1.6532   | 8.5714   | -2.3743 | Down | 5.29E-12  | 1.68E-11  |
| Unigene45497  | Potri.004G209000.1 | 4.2004   | 21.7821  | -2.3745 | Down | 6.02E-51  | 5.99E-50  |
| Unigene21457  | Potri.006G074400.1 | 2.7455   | 14.2375  | -2.3746 | Down | 1.56E-177 | 6.97E-176 |
| Unigene11343  | Potri.006G106000.1 | 2.4694   | 12.8073  | -2.3747 | Down | 3.46E-58  | 3.98E-57  |
| Unigene18164  | Potri.002G215600.1 | 3.6226   | 18.7916  | -2.375  | Down | 3.75E-37  | 2.75E-36  |
| Unigene4072   | Potri.001G144800.3 | 3.3128   | 17.1845  | -2.375  | Down | 2.52E-19  | 1.09E-18  |
| Unigene5081   | Potri.018G138100.1 | 23.9945  | 124.4761 | -2.3751 | Down | 2.90E-140 | 9.51E-139 |
| Unigene107703 | Potri.016G072500.1 | 9.0479   | 46.9491  | -2.3754 | Down | 7.10E-34  | 4.78E-33  |
| Unigene7116   | Potri.007G002500.1 | 2.7946   | 14.5011  | -2.3754 | Down | 7.10E-34  | 4.78E-33  |
| Unigene101023 | Potri.008G115300.1 | 0.9498   | 4.9301   | -2.3759 | Down | 1.14E-08  | 3.00E-08  |
| Unigene33685  | Potri.010G180700.2 | 1.9491   | 10.1179  | -2.376  | Down | 4.18E-45  | 3.67E-44  |
| Unigene9413   | Potri.010G085900.2 | 5.6205   | 29.1756  | -2.376  | Down | 1.35E-30  | 8.34E-30  |
| Unigene26766  | Potri.008G055300.1 | 1.6412   | 8.5193   | -2.376  | Down | 1.14E-08  | 3.00E-08  |
| Unigene71054  | Potri.007G139300.1 | 2.0312   | 10.5436  | -2.376  | Down | 1.14E-08  | 3.00E-08  |
| Unigene48055  | Potri.006G245700.2 | 2.1824   | 11.3288  | -2.376  | Down | 5.02E-16  | 1.91E-15  |
| Unigene10311  | Potri.006G192600.2 | 1.7385   | 9.0246   | -2.376  | Down | 5.02E-16  | 1.91E-15  |
| Unigene64389  | Potri.002G229200.2 | 5.3986   | 28.0239  | -2.376  | Down | 2.53E-23  | 1.26E-22  |
| Unigene88365  | Potri.018G151300.1 | 30.4463  | 158.0779 | -2.3763 | Down | 7.25E-180 | 3.29E-178 |
| Unigene22558  | Potri.007G008100.4 | 10.8489  | 56.3261  | -2.3763 | Down | 8.44E-140 | 2.76E-138 |
| Unigene31299  | Potri.001G173500.1 | 5.4852   | 28.4842  | -2.3765 | Down | 1.41E-34  | 9.64E-34  |
| Unigene10430  | Potri.T091800.2    | 3.0625   | 15.9049  | -2.3767 | Down | 2.59E-27  | 1.45E-26  |
| Unigene33576  | Potri.005G134600.1 | 2.4448   | 12.6972  | -2.3767 | Down | 2.59E-27  | 1.45E-26  |
| Unigene92067  | Potri.008G045300.1 | 7.8222   | 40.6288  | -2.3769 | Down | 2.93E-64  | 3.75E-63  |
| Unigene119150 | Potri.011G147500.2 | 1.7494   | 9.0871   | -2.377  | Down | 4.95E-20  | 2.21E-19  |
| Unigene29958  | Potri.002G027900.1 | 9.2697   | 48.1509  | -2.377  | Down | 5.06E-57  | 5.70E-56  |
| Unigene1710   | Potri.014G024700.1 | 5.4457   | 28.2904  | -2.3771 | Down | 8.83E-50  | 8.58E-49  |
| Unigene4584   | Potri.004G172000.1 | 27.902   | 144.9799 | -2.3774 | Down | 2.79E-191 | 1.37E-189 |
| Unigene20663  | Potri.018G106800.5 | 1.1343   | 5.8948   | -2.3776 | Down | 1.03E-12  | 3.37E-12  |
| Unigene30702  | Potri.014G049300.6 | 1.7614   | 9.1533   | -2.3776 | Down | 1.03E-12  | 3.37E-12  |
| Unigene18979  | Potri.009G111200.7 | 1.9815   | 10.2975  | -2.3776 | Down | 4.99E-24  | 2.54E-23  |

|               |                    |         |          |         |      |           |           |
|---------------|--------------------|---------|----------|---------|------|-----------|-----------|
| Unigene26208  | Potri.002G186900.2 | 0.8734  | 4.5388   | -2.3776 | Down | 1.03E-12  | 3.37E-12  |
| Unigene33528  | Potri.008G217300.2 | 17.1755 | 89.2652  | -2.3777 | Down | 3.52E-155 | 1.32E-153 |
| Unigene39488  | Potri.017G145100.1 | 5.2727  | 27.4038  | -2.3778 | Down | 6.77E-73  | 9.96E-72  |
| Unigene988    | Potri.001G118200.6 | 3.4401  | 17.8792  | -2.3778 | Down | 5.37E-144 | 1.82E-142 |
| Unigene85493  | Potri.006G167200.1 | 53.6907 | 279.0717 | -2.3779 | Down | 1.42E-275 | 1.12E-273 |
| Unigene16248  | Potri.005G121600.2 | 9.5985  | 49.8913  | -2.3779 | Down | 7.32E-77  | 1.15E-75  |
| Unigene11762  | Potri.016G065400.1 | 2.7351  | 14.2177  | -2.378  | Down | 1.87E-54  | 2.00E-53  |
| Unigene44731  | Potri.002G166600.1 | 1.8442  | 9.5868   | -2.3781 | Down | 5.11E-28  | 2.93E-27  |
| Unigene45029  | Potri.001G271700.3 | 1.5738  | 8.1812   | -2.3781 | Down | 5.11E-28  | 2.93E-27  |
| Unigene53332  | Potri.014G106000.1 | 16.298  | 84.7307  | -2.3782 | Down | 5.97E-100 | 1.28E-98  |
| Unigene27533  | Potri.006G279400.5 | 2.4287  | 12.6306  | -2.3787 | Down | 3.73E-55  | 4.04E-54  |
| Unigene22103  | Potri.001G459400.1 | 2.6572  | 13.8192  | -2.3787 | Down | 3.73E-55  | 4.04E-54  |
| Unigene96682  | Potri.007G133400.1 | 0.996   | 5.1804   | -2.3788 | Down | 9.74E-21  | 4.44E-20  |
| Unigene49581  | Potri.001G423700.1 | 3.4669  | 18.0318  | -2.3788 | Down | 9.74E-21  | 4.44E-20  |
| Unigene89359  | Potri.017G109900.3 | 15.9103 | 82.7543  | -2.3789 | Down | 2.38E-101 | 5.17E-100 |
| Unigene21470  | Potri.008G092800.1 | 2.1997  | 11.4414  | -2.3789 | Down | 4.29E-63  | 5.38E-62  |
| Unigene7793   | Potri.001G008700.2 | 3.1048  | 16.152   | -2.3791 | Down | 4.36E-98  | 9.11E-97  |
| Unigene6510   | Potri.008G067400.6 | 4.4847  | 23.3333  | -2.3793 | Down | 1.01E-28  | 5.92E-28  |
| Unigene37623  | Potri.001G109200.3 | 5.9274  | 30.8398  | -2.3793 | Down | 1.01E-28  | 5.92E-28  |
| Unigene3029   | Potri.015G030300.2 | 3.9216  | 20.4047  | -2.3794 | Down | 7.95E-60  | 9.43E-59  |
| Unigene48902  | Potri.006G211200.1 | 5.461   | 28.4183  | -2.3796 | Down | 1.10E-36  | 7.95E-36  |
| Unigene40814  | Potri.006G208900.2 | 5.8487  | 30.4361  | -2.3796 | Down | 1.10E-36  | 7.95E-36  |
| Unigene45587  | Potri.001G399700.1 | 3.273   | 17.0321  | -2.3796 | Down | 1.10E-36  | 7.95E-36  |
| Unigene19748  | Potri.006G026300.1 | 4.3235  | 22.5006  | -2.3797 | Down | 1.15E-40  | 9.19E-40  |
| Unigene51306  | Potri.004G024900.3 | 10.2335 | 53.2712  | -2.3801 | Down | 1.97E-72  | 2.88E-71  |
| Unigene46782  | Potri.019G133500.1 | 0.7691  | 4.0047   | -2.3805 | Down | 2.73E-05  | 5.55E-05  |
| Unigene3185   | Potri.019G091700.1 | 4.101   | 21.355   | -2.3805 | Down | 2.00E-29  | 1.19E-28  |
| Unigene5097   | Potri.019G025200.1 | 1.5434  | 8.037    | -2.3805 | Down | 2.19E-09  | 6.03E-09  |
| Unigene105918 | Potri.017G033200.7 | 0.7691  | 4.0047   | -2.3805 | Down | 2.73E-05  | 5.55E-05  |
| Unigene24825  | Potri.016G140500.1 | 1.6101  | 8.384    | -2.3805 | Down | 2.00E-13  | 6.79E-13  |
| Unigene94675  | Potri.013G004200.2 | 0.7825  | 4.0747   | -2.3805 | Down | 2.73E-05  | 5.55E-05  |
| Unigene5937   | Potri.010G188500.2 | 5.8061  | 30.2337  | -2.3805 | Down | 2.42E-45  | 2.14E-44  |
| Unigene51282  | Potri.009G061000.3 | 1.6101  | 8.384    | -2.3805 | Down | 2.19E-09  | 6.03E-09  |
| Unigene35200  | Potri.008G206400.3 | 0.8138  | 4.2377   | -2.3805 | Down | 2.73E-05  | 5.55E-05  |
| Unigene86568  | Potri.008G107100.1 | 5.1702  | 26.9228  | -2.3805 | Down | 2.00E-29  | 1.19E-28  |
| Unigene105243 | Potri.007G112400.4 | 2.2606  | 11.7714  | -2.3805 | Down | 2.00E-29  | 1.19E-28  |
| Unigene40785  | Potri.006G192400.3 | 0.7038  | 3.6647   | -2.3805 | Down | 2.73E-05  | 5.55E-05  |
| Unigene119518 | Potri.006G090000.3 | 0.6674  | 3.4753   | -2.3805 | Down | 2.00E-13  | 6.79E-13  |
| Unigene110935 | Potri.004G125900.1 | 0.9859  | 5.1338   | -2.3805 | Down | 2.73E-05  | 5.55E-05  |

|               |                    |          |          |         |      |           |           |
|---------------|--------------------|----------|----------|---------|------|-----------|-----------|
| Unigene116252 | Potri.003G106200.4 | 0.715    | 3.7232   | -2.3805 | Down | 2.73E-05  | 5.55E-05  |
| Unigene51829  | Potri.003G053800.3 | 0.8811   | 4.5881   | -2.3805 | Down | 2.73E-05  | 5.55E-05  |
| Unigene115927 | Potri.001G345100.1 | 0.7386   | 3.8461   | -2.3805 | Down | 2.73E-05  | 5.55E-05  |
| Unigene60572  | Potri.001G296100.2 | 1.3646   | 7.1059   | -2.3805 | Down | 2.19E-09  | 6.03E-09  |
| Unigene113457 | Potri.001G113200.1 | 2.6329   | 13.7102  | -2.3805 | Down | 2.00E-13  | 6.79E-13  |
| Unigene6214   | Potri.001G046500.3 | 1.0864   | 5.6571   | -2.3805 | Down | 2.19E-09  | 6.03E-09  |
| Unigene115020 | Potri.018G151600.1 | 0.7964   | 4.1472   | -2.3806 | Down | 2.73E-05  | 5.55E-05  |
| Unigene114225 | Potri.017G007300.2 | 0.8413   | 4.3811   | -2.3806 | Down | 2.73E-05  | 5.55E-05  |
| Unigene116988 | Potri.012G071100.1 | 0.6582   | 3.4276   | -2.3806 | Down | 2.73E-05  | 5.55E-05  |
| Unigene89190  | Potri.018G058600.1 | 151.5427 | 789.3523 | -2.3809 | Down | 0         | 0         |
| Unigene434    | Potri.014G036800.4 | 4.6499   | 24.2192  | -2.3809 | Down | 1.17E-93  | 2.29E-92  |
| Unigene32140  | Potri.007G043300.2 | 9.9411   | 51.7805  | -2.3809 | Down | 1.04E-161 | 4.11E-160 |
| Unigene30637  | Potri.005G085300.1 | 2.2592   | 11.7724  | -2.3815 | Down | 4.12E-34  | 2.79E-33  |
| Unigene535    | Potri.019G062100.1 | 4.4382   | 23.1277  | -2.3816 | Down | 4.65E-95  | 9.31E-94  |
| Unigene71956  | Potri.007G053800.1 | 22.3797  | 116.6351 | -2.3817 | Down | 3.64E-83  | 6.23E-82  |
| Unigene14758  | Potri.T094800.1    | 9.6592   | 50.3516  | -2.3821 | Down | 7.87E-88  | 1.44E-86  |
| Unigene94975  | Potri.018G107600.1 | 3.536    | 18.4336  | -2.3821 | Down | 3.78E-22  | 1.80E-21  |
| Unigene43580  | Potri.006G059700.4 | 5.7932   | 30.1989  | -2.3821 | Down | 7.87E-88  | 1.44E-86  |
| Unigene94719  | Potri.002G023300.2 | 1.212    | 6.3184   | -2.3822 | Down | 3.78E-22  | 1.80E-21  |
| Unigene107239 | Potri.017G070500.1 | 0.6618   | 3.451    | -2.3825 | Down | 3.78E-18  | 1.57E-17  |
| Unigene23546  | Potri.014G144900.1 | 7.0912   | 36.9765  | -2.3825 | Down | 8.16E-35  | 5.62E-34  |
| Unigene12680  | Potri.014G097800.2 | 11.2362  | 58.593   | -2.3826 | Down | 2.93E-130 | 8.73E-129 |
| Unigene78199  | Potri.008G114900.1 | 26.8239  | 139.8787 | -2.3826 | Down | 1.03E-113 | 2.60E-112 |
| Unigene39413  | Potri.014G030100.1 | 4.1245   | 21.5094  | -2.3827 | Down | 1.90E-47  | 1.76E-46  |
| Unigene74773  | Potri.010G063500.1 | 10.8289  | 56.4815  | -2.3829 | Down | 1.79E-43  | 1.52E-42  |
| Unigene24033  | Potri.005G145400.1 | 19.8731  | 103.6638 | -2.383  | Down | 2.37E-265 | 1.77E-263 |
| Unigene8609   | Potri.016G048600.2 | 2.2861   | 11.9259  | -2.3831 | Down | 3.89E-14  | 1.37E-13  |
| Unigene93185  | Potri.005G009000.1 | 21.2944  | 111.0829 | -2.3831 | Down | 3.90E-207 | 2.11E-205 |
| Unigene106939 | Potri.001G041600.1 | 0.6611   | 3.4487   | -2.3831 | Down | 3.89E-14  | 1.37E-13  |
| Unigene8895   | Potri.005G124700.4 | 7.6295   | 39.8091  | -2.3834 | Down | 3.19E-103 | 7.08E-102 |
| Unigene28017  | Potri.012G129700.1 | 1.8595   | 9.7026   | -2.3835 | Down | 1.62E-35  | 1.14E-34  |
| Unigene13110  | Potri.014G007100.1 | 6.7385   | 35.1654  | -2.3837 | Down | 4.04E-180 | 1.84E-178 |
| Unigene38148  | Potri.002G160300.3 | 3.0526   | 15.9302  | -2.3837 | Down | 7.44E-23  | 3.63E-22  |
| Unigene45293  | Potri.003G018500.1 | 8.3387   | 43.5205  | -2.3838 | Down | 1.51E-112 | 3.74E-111 |
| Unigene1189   | Potri.008G062000.1 | 7.4961   | 39.1318  | -2.3841 | Down | 4.06E-139 | 1.32E-137 |
| Unigene16375  | Potri.018G066100.1 | 1.7134   | 8.9458   | -2.3843 | Down | 4.21E-10  | 1.21E-09  |
| Unigene44326  | Potri.010G237700.1 | 3.873    | 20.221   | -2.3843 | Down | 7.08E-45  | 6.19E-44  |
| Unigene94608  | Potri.001G372300.1 | 0.9325   | 4.8686   | -2.3843 | Down | 4.21E-10  | 1.21E-09  |
| Unigene57150  | Potri.018G051800.1 | 2.1744   | 11.3528  | -2.3844 | Down | 4.21E-10  | 1.21E-09  |

|               |                    |         |          |         |      |           |           |
|---------------|--------------------|---------|----------|---------|------|-----------|-----------|
| Unigene16657  | Potri.013G079000.2 | 6.5526  | 34.2117  | -2.3844 | Down | 1.59E-53  | 1.67E-52  |
| Unigene46179  | Potri.011G015500.1 | 6.5526  | 34.2117  | -2.3844 | Down | 7.08E-45  | 6.19E-44  |
| Unigene37837  | Potri.002G181900.3 | 1.125   | 5.8739   | -2.3844 | Down | 4.21E-10  | 1.21E-09  |
| Unigene86533  | Potri.001G449100.2 | 6.4012  | 33.4214  | -2.3844 | Down | 3.21E-36  | 2.30E-35  |
| Unigene7554   | Potri.001G011900.1 | 3.9786  | 20.7772  | -2.3847 | Down | 1.49E-49  | 1.45E-48  |
| Unigene52572  | Potri.016G035600.1 | 2.3137  | 12.0858  | -2.385  | Down | 1.47E-23  | 7.33E-23  |
| Unigene23245  | Potri.003G143000.1 | 1.3482  | 7.0423   | -2.385  | Down | 1.47E-23  | 7.33E-23  |
| Unigene29629  | Potri.016G035600.1 | 3.9897  | 20.8428  | -2.3852 | Down | 3.33E-72  | 4.85E-71  |
| Unigene48942  | Potri.014G070600.1 | 7.1025  | 37.1051  | -2.3852 | Down | 2.02E-107 | 4.71E-106 |
| Unigene54244  | Potri.010G012800.3 | 8.5356  | 44.5942  | -2.3853 | Down | 2.97E-50  | 2.92E-49  |
| Unigene37041  | Potri.012G077300.2 | 2.5902  | 13.5346  | -2.3855 | Down | 7.60E-15  | 2.75E-14  |
| Unigene65     | Potri.010G252000.2 | 3.2719  | 17.0963  | -2.3855 | Down | 7.60E-15  | 2.75E-14  |
| Unigene45867  | Potri.006G160400.3 | 1.3042  | 6.8146   | -2.3855 | Down | 7.60E-15  | 2.75E-14  |
| Unigene116402 | Potri.004G085600.4 | 4.6918  | 24.5155  | -2.3855 | Down | 2.96E-28  | 1.71E-27  |
| Unigene42806  | Potri.015G073700.1 | 2.1835  | 11.4121  | -2.3858 | Down | 3.08E-82  | 5.21E-81  |
| Unigene23253  | Potri.012G109400.3 | 3.2858  | 17.1754  | -2.386  | Down | 1.26E-37  | 9.35E-37  |
| Unigene41818  | Potri.011G117100.1 | 1.559   | 8.149    | -2.386  | Down | 1.46E-19  | 6.39E-19  |
| Unigene66     | Potri.010G252000.2 | 4.5501  | 23.7843  | -2.386  | Down | 1.60E-109 | 3.84E-108 |
| Unigene32333  | Potri.002G136600.1 | 2.9023  | 15.1708  | -2.386  | Down | 1.26E-55  | 1.38E-54  |
| Unigene40663  | Potri.018G111200.1 | 0.8527  | 4.4575   | -2.3861 | Down | 1.46E-19  | 6.39E-19  |
| Unigene13900  | Potri.004G209000.1 | 6.6342  | 34.6832  | -2.3862 | Down | 1.19E-186 | 5.72E-185 |
| Unigene1255   | Potri.017G069300.3 | 5.408   | 28.2753  | -2.3864 | Down | 5.55E-47  | 5.09E-46  |
| Unigene89     | Potri.011G125200.5 | 4.439   | 23.2087  | -2.3864 | Down | 1.23E-295 | 1.07E-293 |
| Unigene53550  | Potri.006G008800.1 | 5.982   | 31.2762  | -2.3864 | Down | 2.89E-24  | 1.48E-23  |
| Unigene13996  | Potri.002G033800.1 | 3.2434  | 16.958   | -2.3864 | Down | 2.89E-24  | 1.48E-23  |
| Unigene29583  | Potri.016G011800.1 | 1.8271  | 9.5542   | -2.3866 | Down | 5.86E-29  | 3.46E-28  |
| Unigene100117 | Potri.019G097100.1 | 2.0532  | 10.7376  | -2.3867 | Down | 1.20E-33  | 8.06E-33  |
| Unigene27707  | Potri.012G086500.1 | 4.8258  | 25.2376  | -2.3867 | Down | 1.20E-33  | 8.06E-33  |
| Unigene109363 | Potri.006G167200.1 | 17.9526 | 93.8907  | -2.3868 | Down | 2.45E-70  | 3.46E-69  |
| Unigene23489  | Potri.005G034100.1 | 2.5049  | 13.1007  | -2.3868 | Down | 2.50E-38  | 1.88E-37  |
| Unigene119565 | Potri.001G190000.2 | 3.6809  | 19.2514  | -2.3868 | Down | 1.27E-111 | 3.13E-110 |
| Unigene21953  | Potri.001G164100.1 | 4.5865  | 23.9868  | -2.3868 | Down | 2.70E-102 | 5.94E-101 |
| Unigene41997  | Potri.004G040300.3 | 13.3866 | 70.0159  | -2.3869 | Down | 1.13E-79  | 1.85E-78  |
| Unigene32139  | Potri.010G111700.2 | 3.7888  | 19.8177  | -2.387  | Down | 2.87E-130 | 8.55E-129 |
| Unigene19773  | Potri.002G213500.2 | 3.3166  | 17.348   | -2.387  | Down | 1.10E-47  | 1.03E-46  |
| Unigene92190  | Potri.010G212700.2 | 70.8691 | 370.7522 | -2.3872 | Down | 0         | 0         |
| Unigene90642  | Potri.004G233900.1 | 12.6569 | 66.2178  | -2.3873 | Down | 1.05E-89  | 1.97E-88  |
| Unigene84244  | Potri.015G105300.4 | 24.3726 | 127.5191 | -2.3874 | Down | 2.41E-122 | 6.63E-121 |
| Unigene70288  | Potri.016G063800.3 | 2.4138  | 12.6314  | -2.3876 | Down | 1.16E-29  | 6.97E-29  |

|               |                    |         |          |         |      |           |           |
|---------------|--------------------|---------|----------|---------|------|-----------|-----------|
| Unigene4952   | Potri.015G057600.1 | 1.9058  | 9.973    | -2.3876 | Down | 8.13E-11  | 2.43E-10  |
| Unigene8477   | Potri.013G079000.2 | 5.365   | 28.0746  | -2.3876 | Down | 9.89E-58  | 1.13E-56  |
| Unigene115636 | Potri.013G051200.1 | 0.8881  | 4.6473   | -2.3876 | Down | 5.09E-06  | 1.10E-05  |
| Unigene85248  | Potri.013G027500.3 | 1.8195  | 9.5212   | -2.3876 | Down | 8.13E-11  | 2.43E-10  |
| Unigene114135 | Potri.013G000200.2 | 0.9853  | 5.1558   | -2.3876 | Down | 5.09E-06  | 1.10E-05  |
| Unigene51164  | Potri.011G078900.1 | 1.7037  | 8.9155   | -2.3876 | Down | 2.87E-20  | 1.29E-19  |
| Unigene20601  | Potri.011G066100.1 | 1.5006  | 7.8523   | -2.3876 | Down | 1.48E-15  | 5.54E-15  |
| Unigene69410  | Potri.010G192900.2 | 5.707   | 29.8644  | -2.3876 | Down | 2.09E-76  | 3.25E-75  |
| Unigene109728 | Potri.010G113300.1 | 2.4064  | 12.5926  | -2.3876 | Down | 8.13E-11  | 2.43E-10  |
| Unigene11491  | Potri.010G085900.1 | 8.8128  | 46.1168  | -2.3876 | Down | 0         | 0         |
| Unigene9113   | Potri.009G111000.1 | 1.1922  | 6.2388   | -2.3876 | Down | 5.09E-06  | 1.10E-05  |
| Unigene38938  | Potri.009G002400.1 | 4.4759  | 23.4222  | -2.3876 | Down | 1.04E-43  | 8.87E-43  |
| Unigene54253  | Potri.008G155900.1 | 2.4288  | 12.7097  | -2.3876 | Down | 8.13E-11  | 2.43E-10  |
| Unigene12801  | Potri.008G108700.1 | 1.8631  | 9.7493   | -2.3876 | Down | 2.39E-34  | 1.63E-33  |
| Unigene98382  | Potri.004G096900.1 | 1.2768  | 6.6812   | -2.3876 | Down | 8.13E-11  | 2.43E-10  |
| Unigene13406  | Potri.004G076300.1 | 1.6319  | 8.5394   | -2.3876 | Down | 2.87E-20  | 1.29E-19  |
| Unigene19812  | Potri.002G253600.3 | 1.0486  | 5.4871   | -2.3876 | Down | 5.09E-06  | 1.10E-05  |
| Unigene16407  | Potri.001G410100.4 | 1.7291  | 9.0483   | -2.3876 | Down | 8.13E-11  | 2.43E-10  |
| Unigene9060   | Potri.001G068100.1 | 1.1868  | 6.2104   | -2.3876 | Down | 5.09E-06  | 1.10E-05  |
| Unigene25423  | Potri.015G119300.1 | 0.9742  | 5.0981   | -2.3877 | Down | 5.09E-06  | 1.10E-05  |
| Unigene22593  | Potri.007G049900.1 | 1.0549  | 5.5204   | -2.3877 | Down | 8.13E-11  | 2.43E-10  |
| Unigene26571  | Potri.001G392600.2 | 13.1259 | 68.7037  | -2.388  | Down | 8.97E-82  | 1.51E-80  |
| Unigene21518  | Potri.002G192300.1 | 5.4626  | 28.5986  | -2.3883 | Down | 2.07E-44  | 1.79E-43  |
| Unigene106014 | Potri.016G068900.1 | 1.2188  | 6.382    | -2.3885 | Down | 2.29E-30  | 1.41E-29  |
| Unigene61203  | Potri.016G040200.4 | 4.2775  | 22.3968  | -2.3885 | Down | 4.73E-35  | 3.28E-34  |
| Unigene36876  | Potri.013G030900.1 | 3.2866  | 17.2105  | -2.3886 | Down | 2.29E-30  | 1.41E-29  |
| Unigene72262  | Potri.017G108800.1 | 63.9162 | 334.7467 | -2.3888 | Down | 3.36E-237 | 2.16E-235 |
| Unigene107910 | Potri.011G123900.1 | 6.5823  | 34.4726  | -2.3888 | Down | 1.13E-25  | 6.02E-25  |
| Unigene34105  | Potri.008G003300.1 | 1.7645  | 9.241    | -2.3888 | Down | 1.13E-25  | 6.02E-25  |
| Unigene91400  | Potri.005G229800.1 | 54.7475 | 286.7632 | -2.389  | Down | 0         | 0         |
| Unigene73960  | Potri.001G131000.2 | 5.0783  | 26.6015  | -2.3891 | Down | 5.64E-21  | 2.59E-20  |
| Unigene118984 | Potri.001G327400.1 | 1.5196  | 7.9626   | -2.3895 | Down | 2.90E-16  | 1.12E-15  |
| Unigene119102 | Potri.019G023500.1 | 2.8443  | 14.904   | -2.3896 | Down | 4.54E-31  | 2.84E-30  |
| Unigene34727  | Potri.018G109500.3 | 2.1795  | 11.4205  | -2.3896 | Down | 4.54E-31  | 2.84E-30  |
| Unigene21484  | Potri.015G100800.1 | 15.3048 | 80.2004  | -2.3896 | Down | 0         | 0         |
| Unigene99835  | Potri.004G002800.1 | 1.3181  | 6.9086   | -2.3899 | Down | 2.22E-26  | 1.21E-25  |
| Unigene34767  | Potri.001G466800.1 | 1.804   | 9.4553   | -2.3899 | Down | 2.22E-26  | 1.21E-25  |
| Unigene84287  | Potri.008G175500.2 | 11.0417 | 57.8841  | -2.3902 | Down | 1.45E-56  | 1.62E-55  |
| Unigene41585  | Potri.005G128900.1 | 8.0701  | 42.3058  | -2.3902 | Down | 1.45E-56  | 1.62E-55  |

|               |                    |         |          |         |      |           |           |
|---------------|--------------------|---------|----------|---------|------|-----------|-----------|
| Unigene101603 | Potri.T078500.1    | 1.2351  | 6.4758   | -2.3904 | Down | 1.57E-11  | 4.87E-11  |
| Unigene107077 | Potri.015G148200.1 | 1.7971  | 9.4224   | -2.3904 | Down | 8.98E-32  | 5.73E-31  |
| Unigene105206 | Potri.011G098300.1 | 1.1303  | 5.9263   | -2.3904 | Down | 1.57E-11  | 4.87E-11  |
| Unigene16272  | Potri.009G071800.1 | 1.4093  | 7.3892   | -2.3904 | Down | 1.57E-11  | 4.87E-11  |
| Unigene119515 | Potri.005G113000.1 | 2.2402  | 11.7458  | -2.3904 | Down | 7.70E-42  | 6.30E-41  |
| Unigene40990  | Potri.002G069200.2 | 2.6145  | 13.708   | -2.3904 | Down | 1.57E-11  | 4.87E-11  |
| Unigene112705 | Potri.014G194600.1 | 2.2836  | 11.9736  | -2.3905 | Down | 1.57E-11  | 4.87E-11  |
| Unigene103461 | Potri.008G182500.1 | 1.9887  | 10.4272  | -2.3905 | Down | 8.98E-32  | 5.73E-31  |
| Unigene99200  | Potri.007G111900.1 | 1.3072  | 6.854    | -2.3905 | Down | 1.57E-11  | 4.87E-11  |
| Unigene118714 | Potri.002G157000.9 | 1.1729  | 6.1499   | -2.3905 | Down | 1.57E-11  | 4.87E-11  |
| Unigene36621  | Potri.019G032500.2 | 31.5077 | 165.2336 | -2.3907 | Down | 1.23E-183 | 5.78E-182 |
| Unigene670    | Potri.003G139100.1 | 8.0022  | 41.9665  | -2.3908 | Down | 1.04E-82  | 1.76E-81  |
| Unigene43519  | Potri.014G099700.1 | 11.0865 | 58.1521  | -2.391  | Down | 1.22E-159 | 4.74E-158 |
| Unigene18610  | Potri.011G096600.1 | 5.3285  | 27.9499  | -2.391  | Down | 5.22E-68  | 7.11E-67  |
| Unigene33606  | Potri.011G119500.8 | 8.7332  | 45.8129  | -2.3912 | Down | 2.23E-73  | 3.31E-72  |
| Unigene73302  | Potri.005G186900.1 | 24.5111 | 128.5927 | -2.3913 | Down | 3.85E-94  | 7.61E-93  |
| Unigene19257  | Potri.005G134500.1 | 1.3198  | 6.9242   | -2.3913 | Down | 5.69E-17  | 2.26E-16  |
| Unigene99064  | Potri.002G152300.3 | 1.4842  | 7.7868   | -2.3913 | Down | 5.69E-17  | 2.26E-16  |
| Unigene27561  | Potri.010G210200.3 | 1.2823  | 6.7276   | -2.3914 | Down | 5.69E-17  | 2.26E-16  |
| Unigene6703   | Potri.001G472600.2 | 7.551   | 39.6242  | -2.3916 | Down | 1.91E-79  | 3.11E-78  |
| Unigene11209  | Potri.003G092400.1 | 3.3467  | 17.5629  | -2.3917 | Down | 3.03E-43  | 2.56E-42  |
| Unigene7616   | Potri.017G069300.2 | 3.0186  | 15.8422  | -2.3918 | Down | 2.07E-69  | 2.89E-68  |
| Unigene105250 | Potri.019G061600.1 | 1.3881  | 7.2855   | -2.3919 | Down | 8.68E-28  | 4.94E-27  |
| Unigene3914   | Potri.018G105300.3 | 14.9592 | 78.5149  | -2.3919 | Down | 2.65E-205 | 1.42E-203 |
| Unigene23186  | Potri.014G165500.4 | 27.3063 | 143.3227 | -2.392  | Down | 6.52E-289 | 5.51E-287 |
| Unigene13697  | Potri.014G109800.1 | 3.9752  | 20.8671  | -2.3921 | Down | 3.52E-33  | 2.33E-32  |
| Unigene83719  | Potri.012G017500.1 | 13.0274 | 68.4035  | -2.3925 | Down | 1.92E-65  | 2.52E-64  |
| Unigene43288  | Potri.016G029100.1 | 3.8165  | 20.0408  | -2.3926 | Down | 1.51E-81  | 2.53E-80  |
| Unigene104066 | Potri.006G066700.2 | 0.7332  | 3.8507   | -2.3928 | Down | 3.05E-12  | 9.80E-12  |
| Unigene112942 | Potri.015G094600.4 | 1.2032  | 6.3194   | -2.3929 | Down | 9.55E-07  | 2.20E-06  |
| Unigene14425  | Potri.014G163200.1 | 0.7894  | 4.1461   | -2.3929 | Down | 9.55E-07  | 2.20E-06  |
| Unigene40480  | Potri.010G030600.1 | 2.8877  | 15.1667  | -2.3929 | Down | 1.11E-17  | 4.54E-17  |
| Unigene115544 | Potri.009G069900.3 | 1.0254  | 5.3856   | -2.3929 | Down | 9.55E-07  | 2.20E-06  |
| Unigene117436 | Potri.008G102200.1 | 0.8243  | 4.3293   | -2.3929 | Down | 9.55E-07  | 2.20E-06  |
| Unigene44083  | Potri.006G190200.1 | 2.4802  | 13.0263  | -2.3929 | Down | 1.30E-87  | 2.36E-86  |
| Unigene23311  | Potri.006G105300.1 | 2.1662  | 11.3773  | -2.3929 | Down | 4.31E-23  | 2.12E-22  |
| Unigene19705  | Potri.005G104700.3 | 1.0991  | 5.7725   | -2.3929 | Down | 3.05E-12  | 9.80E-12  |
| Unigene15097  | Potri.003G201800.3 | 1.1566  | 6.0745   | -2.3929 | Down | 1.11E-17  | 4.55E-17  |
| Unigene15841  | Potri.003G194600.7 | 0.9564  | 5.0232   | -2.3929 | Down | 9.55E-07  | 2.20E-06  |



|               |                     |         |          |         |      |           |           |
|---------------|---------------------|---------|----------|---------|------|-----------|-----------|
| Unigene36649  | Potri.002G122300.1  | 1.3944  | 7.3235   | -2.3929 | Down | 9.55E-07  | 2.20E-06  |
| Unigene1765   | Potri.001G378000.2  | 8.1381  | 42.7424  | -2.3929 | Down | 3.02E-82  | 5.10E-81  |
| Unigene114137 | Potri.001G292000.3  | 1.126   | 5.914    | -2.3929 | Down | 9.55E-07  | 2.20E-06  |
| Unigene44713  | Potri.011G155100.1  | 0.8186  | 4.2997   | -2.393  | Down | 3.05E-12  | 9.80E-12  |
| Unigene30403  | Potri.010G123800.1  | 1.0811  | 5.6783   | -2.393  | Down | 9.55E-07  | 2.20E-06  |
| Unigene117489 | Potri.005G124100.1  | 0.8175  | 4.2938   | -2.393  | Down | 9.55E-07  | 2.20E-06  |
| Unigene36102  | Potri.007G082500.1  | 25.5277 | 134.0932 | -2.3931 | Down | 3.25E-131 | 9.76E-130 |
| Unigene11211  | Potri.018G074300.1  | 7.8166  | 41.0846  | -2.394  | Down | 4.50E-140 | 1.47E-138 |
| Unigene39654  | Potri.016G094800.1  | 5.4464  | 28.6275  | -2.394  | Down | 3.03E-68  | 4.13E-67  |
| Unigene88604  | Potri.015G010200.3  | 12.8772 | 67.6929  | -2.3942 | Down | 1.11E-79  | 1.81E-78  |
| Unigene30611  | Potri.010G209700.1  | 7.0698  | 37.1647  | -2.3942 | Down | 1.13E-40  | 9.02E-40  |
| Unigene28820  | Potri.008G118600.1  | 19.1195 | 100.5136 | -2.3943 | Down | 5.95E-275 | 4.66E-273 |
| Unigene26753  | Potri.008G121000.2  | 9.9169  | 52.1451  | -2.3946 | Down | 9.38E-47  | 8.56E-46  |
| Unigene32773  | Potri.014G026100.1  | 1.6991  | 8.9349   | -2.3947 | Down | 3.32E-58  | 3.82E-57  |
| Unigene75498  | Potri.004G235600.1  | 36.962  | 194.38   | -2.3948 | Down | 6.24E-149 | 2.22E-147 |
| Unigene38168  | Potri.001G229700.2  | 6.2995  | 33.1305  | -2.3949 | Down | 7.85E-53  | 8.12E-52  |
| Unigene86468  | Potri.017G121100.3  | 4.1993  | 22.0886  | -2.3951 | Down | 1.67E-24  | 8.63E-24  |
| Unigene116819 | Potri.017G007800.1  | 5.7125  | 30.0484  | -2.3951 | Down | 5.43E-36  | 3.86E-35  |
| Unigene31015  | Potri.011G081300.1  | 0.9578  | 5.0383   | -2.3951 | Down | 5.93E-13  | 1.97E-12  |
| Unigene17566  | Potri.004G163900.1  | 1.9099  | 10.0463  | -2.3951 | Down | 5.93E-13  | 1.97E-12  |
| Unigene9330   | Potri.003G198500.1  | 2.745   | 14.4388  | -2.3951 | Down | 5.93E-13  | 1.97E-12  |
| Unigene29771  | Potri.001G143400.12 | 2.7934  | 14.6933  | -2.3951 | Down | 5.93E-13  | 1.97E-12  |
| Unigene44887  | Potri.007G034500.2  | 7.0524  | 37.1038  | -2.3954 | Down | 7.91E-123 | 2.19E-121 |
| Unigene33224  | Potri.004G184400.1  | 2.6776  | 14.0883  | -2.3955 | Down | 1.33E-30  | 8.19E-30  |
| Unigene48801  | Potri.001G232900.1  | 1.8309  | 9.6334   | -2.3955 | Down | 1.33E-30  | 8.19E-30  |
| Unigene47331  | Potri.009G155200.1  | 12.3734 | 65.1078  | -2.3956 | Down | 3.70E-48  | 3.49E-47  |
| Unigene7048   | Potri.008G217300.3  | 3.6052  | 18.9722  | -2.3957 | Down | 4.29E-19  | 1.85E-18  |
| Unigene34599  | Potri.001G276600.1  | 6.5274  | 34.3584  | -2.3961 | Down | 1.89E-72  | 2.76E-71  |
| Unigene8593   | Potri.015G066000.1  | 29.2084 | 153.7548 | -2.3962 | Down | 0         | 0         |
| Unigene90599  | Potri.008G043100.1  | 16.0542 | 84.5132  | -2.3962 | Down | 3.33E-114 | 8.41E-113 |
| Unigene32800  | Potri.001G249900.1  | 10.9169 | 57.4681  | -2.3962 | Down | 5.49E-244 | 3.68E-242 |
| Unigene70333  | Potri.002G036600.1  | 5.4913  | 28.911   | -2.3964 | Down | 3.77E-73  | 5.56E-72  |
| Unigene53311  | Potri.009G120800.1  | 14.7298 | 77.5549  | -2.3965 | Down | 2.76E-85  | 4.87E-84  |
| Unigene80625  | Potri.008G114900.1  | 56.3238 | 296.6281 | -2.3968 | Down | 6.17E-255 | 4.37E-253 |
| Unigene2764   | Potri.001G113900.1  | 6.565   | 34.5743  | -2.3968 | Down | 2.30E-122 | 6.33E-121 |
| Unigene95502  | Potri.006G074300.1  | 0.7038  | 3.7068   | -2.3969 | Down | 1.15E-13  | 3.96E-13  |
| Unigene64928  | Potri.019G035000.1  | 5.1965  | 27.3707  | -2.397  | Down | 5.20E-32  | 3.34E-31  |
| Unigene27413  | Potri.014G143400.2  | 1.5986  | 8.4198   | -2.397  | Down | 1.81E-07  | 4.39E-07  |
| Unigene4966   | Potri.014G068400.1  | 1.6139  | 8.5007   | -2.397  | Down | 1.81E-07  | 4.39E-07  |

|               |                    |         |          |         |      |           |           |
|---------------|--------------------|---------|----------|---------|------|-----------|-----------|
| Unigene116858 | Potri.013G043500.1 | 1.0021  | 5.2781   | -2.397  | Down | 1.81E-07  | 4.39E-07  |
| Unigene9332   | Potri.013G041200.1 | 1.5054  | 7.9289   | -2.397  | Down | 1.81E-07  | 4.39E-07  |
| Unigene102002 | Potri.013G006700.2 | 0.6823  | 3.5938   | -2.397  | Down | 1.81E-07  | 4.39E-07  |
| Unigene102147 | Potri.011G012000.1 | 1.4285  | 7.524    | -2.397  | Down | 1.81E-07  | 4.39E-07  |
| Unigene28215  | Potri.010G171100.5 | 1.8411  | 9.6973   | -2.397  | Down | 8.43E-20  | 3.73E-19  |
| Unigene115500 | Potri.010G133600.1 | 1.1576  | 6.0971   | -2.397  | Down | 1.81E-07  | 4.39E-07  |
| Unigene115582 | Potri.006G133200.3 | 1.1457  | 6.0346   | -2.397  | Down | 1.81E-07  | 4.39E-07  |
| Unigene36242  | Potri.005G076600.1 | 0.6851  | 3.6085   | -2.397  | Down | 1.81E-07  | 4.39E-07  |
| Unigene101598 | Potri.001G074700.1 | 0.7955  | 4.1899   | -2.397  | Down | 1.81E-07  | 4.39E-07  |
| Unigene99092  | Potri.001G048900.1 | 0.7527  | 3.9645   | -2.397  | Down | 1.81E-07  | 4.39E-07  |
| Unigene44316  | Potri.012G097600.1 | 1.4149  | 7.4527   | -2.3971 | Down | 6.52E-26  | 3.51E-25  |
| Unigene46112  | Potri.008G173900.2 | 1.4595  | 7.6876   | -2.3971 | Down | 1.15E-13  | 3.96E-13  |
| Unigene118680 | Potri.006G192300.1 | 0.7112  | 3.7461   | -2.3971 | Down | 1.81E-07  | 4.39E-07  |
| Unigene36317  | Potri.005G255400.1 | 1.2911  | 6.8006   | -2.3971 | Down | 1.81E-07  | 4.39E-07  |
| Unigene104539 | Potri.002G213400.1 | 0.8904  | 4.6901   | -2.3971 | Down | 1.81E-07  | 4.39E-07  |
| Unigene6258   | Potri.001G110900.1 | 0.805   | 4.2402   | -2.3971 | Down | 1.81E-07  | 4.39E-07  |
| Unigene48885  | Potri.016G022500.1 | 14.2567 | 75.1017  | -2.3972 | Down | 1.05E-117 | 2.77E-116 |
| Unigene42656  | Potri.008G040500.2 | 7.2986  | 38.447   | -2.3972 | Down | 7.95E-130 | 2.35E-128 |
| Unigene23906  | Potri.006G133200.5 | 19.7419 | 103.9928 | -2.3972 | Down | 4.00E-160 | 1.56E-158 |
| Unigene2336   | Potri.001G406800.1 | 3.4597  | 18.2289  | -2.3975 | Down | 6.93E-45  | 6.06E-44  |
| Unigene83463  | Potri.014G025200.2 | 5.1114  | 26.939   | -2.3979 | Down | 1.29E-26  | 7.07E-26  |
| Unigene107363 | Potri.010G043200.4 | 6.9004  | 36.3676  | -2.3979 | Down | 1.29E-26  | 7.07E-26  |
| Unigene12681  | Potri.002G019500.1 | 2.5369  | 13.3704  | -2.3979 | Down | 1.29E-26  | 7.07E-26  |
| Unigene6497   | Potri.003G058900.1 | 6.397   | 33.7174  | -2.398  | Down | 1.38E-45  | 1.22E-44  |
| Unigene2126   | Potri.017G138600.1 | 12.8343 | 67.6544  | -2.3982 | Down | 6.66E-153 | 2.45E-151 |
| Unigene51354  | Potri.012G103300.1 | 8.5606  | 45.126   | -2.3982 | Down | 1.66E-39  | 1.29E-38  |
| Unigene34030  | Potri.008G007500.1 | 13.5437 | 71.397   | -2.3982 | Down | 5.79E-128 | 1.68E-126 |
| Unigene11036  | Potri.006G160500.1 | 5.0927  | 26.8494  | -2.3984 | Down | 1.52E-147 | 5.35E-146 |
| Unigene52455  | Potri.001G307400.2 | 12.0086 | 63.3162  | -2.3985 | Down | 6.90E-91  | 1.31E-89  |
| Unigene35811  | Potri.010G217600.1 | 1.3499  | 7.1185   | -2.3987 | Down | 2.25E-14  | 7.96E-14  |
| Unigene27334  | Potri.007G044100.1 | 26.6043 | 140.2881 | -2.3987 | Down | 4.01E-136 | 1.26E-134 |
| Unigene28272  | Potri.003G023000.1 | 7.945   | 41.8971  | -2.3987 | Down | 6.46E-66  | 8.52E-65  |
| Unigene100338 | Potri.017G152800.2 | 2.4607  | 12.9765  | -2.3988 | Down | 2.25E-14  | 7.97E-14  |
| Unigene1510   | Potri.015G142200.1 | 9.8048  | 51.7089  | -2.3989 | Down | 2.37E-98  | 4.97E-97  |
| Unigene49809  | Potri.008G149000.2 | 4.3387  | 22.8832  | -2.399  | Down | 5.43E-47  | 4.98E-46  |
| Unigene33944  | Potri.018G107600.1 | 6.3323  | 33.407   | -2.3993 | Down | 1.62E-106 | 3.75E-105 |
| Unigene30668  | Potri.001G278200.1 | 1.5343  | 8.094    | -2.3993 | Down | 3.26E-21  | 1.51E-20  |
| Unigene98952  | Potri.001G092200.1 | 2.6383  | 13.9178  | -2.3993 | Down | 3.26E-21  | 1.51E-20  |
| Unigene44899  | Potri.006G219200.1 | 18.8032 | 99.2117  | -2.3995 | Down | 1.62E-291 | 1.39E-289 |

|               |                    |         |          |         |      |           |           |
|---------------|--------------------|---------|----------|---------|------|-----------|-----------|
| Unigene15270  | Potri.005G098100.1 | 1.9954  | 10.5286  | -2.3996 | Down | 5.02E-28  | 2.88E-27  |
| Unigene30942  | Potri.016G085500.1 | 3.8397  | 20.2614  | -2.3997 | Down | 8.00E-35  | 5.51E-34  |
| Unigene22148  | Potri.012G007000.2 | 9.739   | 51.3914  | -2.3997 | Down | 3.75E-101 | 8.13E-100 |
| Unigene33919  | Potri.010G120800.1 | 13.5871 | 71.6994  | -2.3997 | Down | 6.46E-108 | 1.52E-106 |
| Unigene48999  | Potri.004G171600.1 | 9.1303  | 48.1917  | -2.4001 | Down | 5.04E-89  | 9.33E-88  |
| Unigene34539  | Potri.013G104100.4 | 30.3996 | 160.4715 | -2.4002 | Down | 0         | 0         |
| Unigene26857  | Potri.002G142800.1 | 0.7475  | 3.946    | -2.4002 | Down | 3.44E-08  | 8.80E-08  |
| Unigene116959 | Potri.017G145400.1 | 1.1003  | 5.8085   | -2.4003 | Down | 3.44E-08  | 8.80E-08  |
| Unigene48988  | Potri.012G052500.2 | 4.3676  | 23.0571  | -2.4003 | Down | 1.58E-35  | 1.11E-34  |
| Unigene23406  | Potri.011G154200.1 | 1.3345  | 7.045    | -2.4003 | Down | 4.39E-15  | 1.60E-14  |
| Unigene54376  | Potri.010G211100.3 | 5.2046  | 27.4755  | -2.4003 | Down | 6.41E-22  | 3.04E-21  |
| Unigene28109  | Potri.009G021700.1 | 2.5033  | 13.2153  | -2.4003 | Down | 4.39E-15  | 1.60E-14  |
| Unigene102111 | Potri.007G132100.1 | 1.2951  | 6.8371   | -2.4003 | Down | 3.44E-08  | 8.80E-08  |
| Unigene106331 | Potri.006G021300.1 | 0.6794  | 3.5867   | -2.4003 | Down | 3.44E-08  | 8.80E-08  |
| Unigene52796  | Potri.006G004300.2 | 2.4379  | 12.8698  | -2.4003 | Down | 4.39E-15  | 1.60E-14  |
| Unigene10537  | Potri.003G196900.2 | 3.6885  | 19.4717  | -2.4003 | Down | 7.11E-56  | 7.83E-55  |
| Unigene117805 | Potri.001G422700.1 | 0.9688  | 5.1145   | -2.4003 | Down | 3.44E-08  | 8.80E-08  |
| Unigene106504 | Potri.001G392700.1 | 0.9739  | 5.1412   | -2.4003 | Down | 3.44E-08  | 8.80E-08  |
| Unigene22521  | Potri.004G114400.1 | 18.8978 | 99.7683  | -2.4004 | Down | 2.22E-259 | 1.61E-257 |
| Unigene119553 | Potri.014G077200.1 | 2.6559  | 14.0239  | -2.4006 | Down | 2.38E-63  | 3.00E-62  |
| Unigene33941  | Potri.001G276600.1 | 13.0443 | 68.8998  | -2.4011 | Down | 4.88E-127 | 1.41E-125 |
| Unigene43942  | Potri.005G257000.2 | 7.7917  | 41.16    | -2.4012 | Down | 9.40E-107 | 2.18E-105 |
| Unigene10697  | Potri.010G076700.2 | 9.0365  | 47.7379  | -2.4013 | Down | 0         | 0         |
| Unigene15608  | Potri.005G203100.6 | 2.2316  | 11.7922  | -2.4017 | Down | 8.57E-16  | 3.23E-15  |
| Unigene71773  | Potri.008G158000.1 | 23.4036 | 123.7074 | -2.4021 | Down | 1.46E-88  | 2.69E-87  |
| Unigene36288  | Potri.003G109400.5 | 3.0217  | 15.9723  | -2.4021 | Down | 2.49E-23  | 1.24E-22  |
| Unigene12657  | Potri.016G088500.1 | 1.3615  | 7.1979   | -2.4024 | Down | 7.68E-31  | 4.77E-30  |
| Unigene7485   | Potri.005G045500.1 | 7.5571  | 39.9526  | -2.4024 | Down | 1.00E-96  | 2.05E-95  |
| Unigene16144  | Potri.018G145800.3 | 7.4015  | 39.136   | -2.4026 | Down | 2.63E-53  | 2.75E-52  |
| Unigene6253   | Potri.016G032600.2 | 11.2286 | 59.374   | -2.4027 | Down | 8.78E-61  | 1.06E-59  |
| Unigene3942   | Potri.016G013100.1 | 8.2219  | 43.48    | -2.4028 | Down | 4.71E-113 | 1.18E-111 |
| Unigene40279  | Potri.019G126100.1 | 0.9887  | 5.2289   | -2.4029 | Down | 6.57E-09  | 1.75E-08  |
| Unigene2969   | Potri.002G215600.1 | 1.5842  | 8.3784   | -2.4029 | Down | 1.68E-16  | 6.52E-16  |
| Unigene111293 | Potri.001G065500.1 | 1.7762  | 9.3939   | -2.4029 | Down | 6.57E-09  | 1.75E-08  |
| Unigene73464  | Potri.018G022700.6 | 21.3898 | 113.128  | -2.403  | Down | 6.77E-84  | 1.17E-82  |
| Unigene99913  | Potri.004G032700.1 | 0.6838  | 3.6167   | -2.403  | Down | 6.57E-09  | 1.75E-08  |
| Unigene2835   | Potri.003G100500.1 | 3.136   | 16.586   | -2.403  | Down | 1.58E-46  | 1.44E-45  |
| Unigene102638 | Potri.001G182600.1 | 0.8173  | 4.3227   | -2.403  | Down | 6.57E-09  | 1.75E-08  |
| Unigene48010  | Potri.017G006800.1 | 12.4332 | 65.7758  | -2.4034 | Down | 3.14E-47  | 2.90E-46  |

|               |                     |         |          |         |      |           |           |
|---------------|---------------------|---------|----------|---------|------|-----------|-----------|
| Unigene26539  | Potri.015G037500.1  | 6.6795  | 35.3402  | -2.4035 | Down | 2.33E-70  | 3.30E-69  |
| Unigene38507  | Potri.002G046300.4  | 4.6404  | 24.5541  | -2.4036 | Down | 2.07E-55  | 2.26E-54  |
| Unigene65215  | Potri.014G013800.2  | 4.4188  | 23.383   | -2.4037 | Down | 9.67E-25  | 5.02E-24  |
| Unigene30886  | Potri.012G077500.2  | 2.013   | 10.6523  | -2.4037 | Down | 9.67E-25  | 5.02E-24  |
| Unigene11155  | Potri.001G135400.1  | 7.4911  | 39.6388  | -2.4037 | Down | 2.00E-262 | 1.47E-260 |
| Unigene31442  | Potri.005G003500.2  | 2.0186  | 10.6845  | -2.4041 | Down | 3.28E-17  | 1.31E-16  |
| Unigene52030  | Potri.005G079900.3  | 1.5857  | 8.3936   | -2.4042 | Down | 3.28E-17  | 1.31E-16  |
| Unigene50736  | Potri.018G145800.3  | 3.6855  | 19.5107  | -2.4043 | Down | 3.79E-41  | 3.06E-40  |
| Unigene72096  | Potri.008G107300.1  | 14.7379 | 78.0181  | -2.4043 | Down | 8.19E-57  | 9.18E-56  |
| Unigene11194  | Potri.013G154800.1  | 4.0839  | 21.6221  | -2.4045 | Down | 3.67E-73  | 5.42E-72  |
| Unigene44945  | Potri.009G067800.2  | 8.3152  | 44.0246  | -2.4045 | Down | 3.67E-73  | 5.42E-72  |
| Unigene64380  | Potri.016G092900.1  | 8.8912  | 47.0774  | -2.4046 | Down | 1.63E-57  | 1.85E-56  |
| Unigene44228  | Potri.005G164700.1  | 26.1261 | 138.3469 | -2.4047 | Down | 6.17E-218 | 3.54E-216 |
| Unigene18890  | Potri.003G087700.10 | 2.6929  | 14.2593  | -2.4047 | Down | 1.18E-33  | 7.89E-33  |
| Unigene111784 | Potri.012G143900.1  | 1.8966  | 10.0463  | -2.4052 | Down | 1.26E-09  | 3.51E-09  |
| Unigene99437  | Potri.008G045400.4  | 1.9718  | 10.4446  | -2.4052 | Down | 1.26E-09  | 3.51E-09  |
| Unigene37615  | Potri.006G166500.2  | 4.0324  | 21.3597  | -2.4052 | Down | 3.77E-26  | 2.04E-25  |
| Unigene45263  | Potri.005G190000.1  | 3.3217  | 17.595   | -2.4052 | Down | 2.33E-34  | 1.59E-33  |
| Unigene3059   | Potri.001G368800.1  | 4.5364  | 24.0297  | -2.4052 | Down | 9.74E-51  | 9.66E-50  |
| Unigene6188   | Potri.003G083600.1  | 17.6491 | 93.5041  | -2.4054 | Down | 8.58E-68  | 1.16E-66  |
| Unigene10950  | Potri.008G200200.2  | 5.904   | 31.2801  | -2.4055 | Down | 1.72E-117 | 4.52E-116 |
| Unigene40980  | Potri.001G165800.1  | 14.8848 | 78.8611  | -2.4055 | Down | 1.28E-59  | 1.51E-58  |
| Unigene42756  | Potri.004G082000.1  | 8.5227  | 45.1616  | -2.4057 | Down | 1.69E-285 | 1.40E-283 |
| Unigene75389  | Potri.004G160100.1  | 6.2731  | 33.2441  | -2.4058 | Down | 7.44E-27  | 4.12E-26  |
| Unigene1494   | Potri.005G116500.1  | 2.089   | 11.0718  | -2.406  | Down | 5.88E-44  | 5.04E-43  |
| Unigene116306 | Potri.005G087000.2  | 2.9603  | 15.6914  | -2.4062 | Down | 1.26E-18  | 5.34E-18  |
| Unigene39693  | Potri.018G005700.1  | 2.3605  | 12.5137  | -2.4063 | Down | 1.23E-87  | 2.24E-86  |
| Unigene8674   | Potri.013G047500.2  | 5.3285  | 28.2535  | -2.4066 | Down | 1.82E-36  | 1.31E-35  |
| Unigene91508  | Potri.012G071600.4  | 66.2419 | 351.2414 | -2.4066 | Down | 0         | 0         |
| Unigene21282  | Potri.015G066400.1  | 6.2947  | 33.3777  | -2.4067 | Down | 0         | 0         |
| Unigene49113  | Potri.008G198900.2  | 2.7344  | 14.5029  | -2.407  | Down | 2.90E-28  | 1.68E-27  |
| Unigene37248  | Potri.005G218600.1  | 1.2694  | 6.7326   | -2.407  | Down | 2.43E-10  | 7.06E-10  |
| Unigene95232  | Potri.002G155500.1  | 0.6474  | 3.4337   | -2.407  | Down | 2.43E-10  | 7.05E-10  |
| Unigene46393  | Potri.015G084800.1  | 0.9063  | 4.8072   | -2.4071 | Down | 2.43E-10  | 7.05E-10  |
| Unigene5012   | Potri.014G107300.2  | 1.9242  | 10.2058  | -2.4071 | Down | 2.43E-10  | 7.05E-10  |
| Unigene63379  | Potri.010G027900.1  | 5.051   | 26.7901  | -2.4071 | Down | 3.60E-37  | 2.64E-36  |
| Unigene32414  | Potri.002G137600.1  | 6.6652  | 35.3519  | -2.4071 | Down | 1.07E-72  | 1.56E-71  |
| Unigene119015 | Potri.002G126700.1  | 0.8848  | 4.6932   | -2.4071 | Down | 2.43E-10  | 7.06E-10  |
| Unigene118195 | Potri.001G380400.4  | 1.1712  | 6.2122   | -2.4071 | Down | 2.43E-10  | 7.06E-10  |

|               |                     |         |          |         |      |           |           |
|---------------|---------------------|---------|----------|---------|------|-----------|-----------|
| Unigene22117  | Potri.005G165400.8  | 8.7476  | 46.4043  | -2.4073 | Down | 3.79E-136 | 1.20E-134 |
| Unigene9630   | Potri.001G088600.1  | 6.59    | 34.9786  | -2.4081 | Down | 3.34E-104 | 7.51E-103 |
| Unigene23348  | Potri.006G237600.1  | 2.5964  | 13.7817  | -2.4082 | Down | 1.13E-29  | 6.82E-29  |
| Unigene39083  | Potri.004G227700.7  | 2.4786  | 13.1563  | -2.4082 | Down | 1.13E-29  | 6.82E-29  |
| Unigene29859  | Potri.017G078100.6  | 21.5945 | 114.6482 | -2.4085 | Down | 1.38E-219 | 8.04E-218 |
| Unigene34738  | Potri.017G116400.1  | 3.428   | 18.2021  | -2.4087 | Down | 2.24E-30  | 1.38E-29  |
| Unigene11890  | Potri.015G086800.1  | 16.0077 | 85.0029  | -2.4087 | Down | 7.89E-213 | 4.39E-211 |
| Unigene116009 | Potri.012G110700.1  | 1.7121  | 9.0911   | -2.4087 | Down | 4.68E-11  | 1.42E-10  |
| Unigene104970 | Potri.010G082100.1  | 1.8069  | 9.5944   | -2.4087 | Down | 4.68E-11  | 1.42E-10  |
| Unigene11892  | Potri.003G113700.1  | 3.1145  | 16.5375  | -2.4087 | Down | 3.73E-59  | 4.37E-58  |
| Unigene21015  | Potri.001G111300.1  | 1.5136  | 8.037    | -2.4087 | Down | 4.68E-11  | 1.42E-10  |
| Unigene22812  | Potri.014G185300.1  | 2.9581  | 15.7085  | -2.4088 | Down | 2.20E-136 | 6.94E-135 |
| Unigene87840  | Potri.010G167100.10 | 17.8992 | 95.0511  | -2.4088 | Down | 1.06E-107 | 2.47E-106 |
| Unigene403    | Potri.001G342300.4  | 3.7013  | 19.6552  | -2.4088 | Down | 1.06E-107 | 2.48E-106 |
| Unigene32881  | Potri.016G059300.1  | 4.1662  | 22.1256  | -2.4089 | Down | 5.78E-118 | 1.52E-116 |
| Unigene32625  | Potri.018G076600.3  | 17.6993 | 94.0009  | -2.409  | Down | 2.89E-186 | 1.38E-184 |
| Unigene31906  | Potri.002G065800.3  | 10.5757 | 56.1947  | -2.4097 | Down | 4.01E-243 | 2.67E-241 |
| Unigene7111   | Potri.019G053000.1  | 3.4278  | 18.2148  | -2.4098 | Down | 4.35E-42  | 3.58E-41  |
| Unigene43800  | Potri.002G120200.1  | 7.3498  | 39.0582  | -2.4098 | Down | 2.10E-184 | 9.90E-183 |
| Unigene93057  | Potri.001G236800.1  | 1.0537  | 5.6002   | -2.41   | Down | 9.07E-12  | 2.84E-11  |
| Unigene44486  | Potri.016G057800.1  | 0.9781  | 5.1988   | -2.4101 | Down | 3.70E-22  | 1.77E-21  |
| Unigene77338  | Potri.006G111300.1  | 17.1902 | 91.3777  | -2.4103 | Down | 2.45E-74  | 3.68E-73  |
| Unigene50308  | Potri.006G019900.1  | 5.6995  | 30.3024  | -2.4105 | Down | 1.68E-117 | 4.39E-116 |
| Unigene90434  | Potri.004G153700.2  | 22.4578 | 119.3985 | -2.4105 | Down | 3.10E-159 | 1.20E-157 |
| Unigene20186  | Potri.010G041000.2  | 2.7862  | 14.8153  | -2.4107 | Down | 7.29E-23  | 3.56E-22  |
| Unigene27270  | Potri.018G085600.2  | 1.6859  | 8.9679   | -2.4113 | Down | 1.76E-12  | 5.71E-12  |
| Unigene19861  | Potri.014G111900.1  | 2.6883  | 14.3001  | -2.4113 | Down | 1.76E-12  | 5.71E-12  |
| Unigene41875  | Potri.013G004600.1  | 4.7871  | 25.465   | -2.4113 | Down | 1.35E-34  | 9.25E-34  |
| Unigene59320  | Potri.012G089700.1  | 2.0794  | 11.0614  | -2.4113 | Down | 1.76E-12  | 5.71E-12  |
| Unigene33475  | Potri.010G171500.1  | 14.424  | 76.7282  | -2.4113 | Down | 3.47E-177 | 1.55E-175 |
| Unigene24019  | Potri.007G139100.2  | 9.8295  | 52.288   | -2.4113 | Down | 2.82E-155 | 1.06E-153 |
| Unigene101643 | Potri.006G137900.2  | 1.1936  | 6.3493   | -2.4113 | Down | 1.76E-12  | 5.71E-12  |
| Unigene22493  | Potri.004G050200.1  | 2.0989  | 11.1652  | -2.4113 | Down | 1.35E-34  | 9.25E-34  |
| Unigene28070  | Potri.003G038500.1  | 1.6811  | 8.9426   | -2.4113 | Down | 1.76E-12  | 5.71E-12  |
| Unigene37717  | Potri.001G184700.1  | 3.639   | 19.3575  | -2.4113 | Down | 1.44E-23  | 7.18E-23  |
| Unigene4631   | Potri.009G115600.2  | 0.8323  | 4.4277   | -2.4114 | Down | 1.76E-12  | 5.71E-12  |
| Unigene73463  | Potri.008G203100.1  | 57.0984 | 303.7697 | -2.4115 | Down | 4.28E-223 | 2.53E-221 |
| Unigene16906  | Potri.002G074800.1  | 8.9652  | 47.6976  | -2.4115 | Down | 7.69E-113 | 1.91E-111 |
| Unigene43377  | Potri.012G007000.2  | 8.9962  | 47.8644  | -2.4116 | Down | 5.53E-180 | 2.51E-178 |

|               |                    |         |          |         |      |           |           |
|---------------|--------------------|---------|----------|---------|------|-----------|-----------|
| Unigene25755  | Potri.019G094200.1 | 8.898   | 47.3508  | -2.4118 | Down | 1.14E-69  | 1.59E-68  |
| Unigene12237  | Potri.003G088300.1 | 5.7518  | 30.6084  | -2.4118 | Down | 1.14E-69  | 1.59E-68  |
| Unigene22398  | Potri.001G367900.1 | 19.4521 | 103.5148 | -2.4118 | Down | 0         | 0         |
| Unigene16566  | Potri.009G014600.1 | 2.977   | 15.8477  | -2.4123 | Down | 3.42E-13  | 1.15E-12  |
| Unigene70070  | Potri.001G204200.1 | 1.1635  | 6.1937   | -2.4123 | Down | 3.42E-13  | 1.15E-12  |
| Unigene43206  | Potri.006G160300.1 | 4.131   | 21.992   | -2.4124 | Down | 9.06E-166 | 3.71E-164 |
| Unigene48870  | Potri.013G155100.3 | 14.5833 | 77.6511  | -2.4127 | Down | 7.05E-109 | 1.67E-107 |
| Unigene23901  | Potri.004G040000.4 | 7.2017  | 38.3553  | -2.413  | Down | 1.42E-74  | 2.14E-73  |
| Unigene33092  | Potri.013G000200.1 | 2.2049  | 11.7454  | -2.4133 | Down | 2.18E-26  | 1.19E-25  |
| Unigene111725 | Potri.012G037100.2 | 2.8449  | 15.1546  | -2.4133 | Down | 6.65E-14  | 2.31E-13  |
| Unigene109368 | Potri.010G226100.1 | 3.1373  | 16.7125  | -2.4133 | Down | 6.65E-14  | 2.31E-13  |
| Unigene32033  | Potri.010G220800.1 | 1.8     | 9.5884   | -2.4133 | Down | 5.62E-76  | 8.68E-75  |
| Unigene38079  | Potri.006G240500.7 | 0.9773  | 5.2059   | -2.4133 | Down | 6.65E-14  | 2.31E-13  |
| Unigene89556  | Potri.018G058600.3 | 71.9944 | 383.5554 | -2.4135 | Down | 0         | 0         |
| Unigene24353  | Potri.004G115800.1 | 2.4554  | 13.0824  | -2.4136 | Down | 2.23E-77  | 3.52E-76  |
| Unigene31969  | Potri.009G116700.1 | 2.4284  | 12.9416  | -2.4139 | Down | 2.56E-53  | 2.68E-52  |
| Unigene74243  | Potri.015G041600.1 | 55.5156 | 295.8753 | -2.414  | Down | 1.04E-221 | 6.10E-220 |
| Unigene113444 | Potri.009G051500.1 | 2.7792  | 14.8134  | -2.4142 | Down | 1.30E-14  | 4.64E-14  |
| Unigene94660  | Potri.005G156900.1 | 3.122   | 16.6406  | -2.4142 | Down | 1.30E-14  | 4.64E-14  |
| Unigene100645 | Potri.001G010500.2 | 0.9668  | 5.1534   | -2.4142 | Down | 1.30E-14  | 4.64E-14  |
| Unigene47487  | Potri.003G038700.1 | 21.874  | 116.6052 | -2.4143 | Down | 8.89E-121 | 2.42E-119 |
| Unigene21673  | Potri.015G112600.1 | 2.782   | 14.8308  | -2.4144 | Down | 1.19E-94  | 2.37E-93  |
| Unigene79943  | Potri.006G145100.6 | 18.1169 | 96.6085  | -2.4148 | Down | 1.11E-83  | 1.91E-82  |
| Unigene22903  | Potri.003G131300.5 | 4.6722  | 24.9165  | -2.4149 | Down | 4.99E-43  | 4.19E-42  |
| Unigene96021  | Potri.008G125800.1 | 1.1822  | 6.3048   | -2.415  | Down | 2.53E-15  | 9.34E-15  |
| Unigene45641  | Potri.018G066600.1 | 7.2485  | 38.6667  | -2.4153 | Down | 5.94E-101 | 1.29E-99  |
| Unigene20464  | Potri.006G021400.1 | 2.0666  | 11.0249  | -2.4154 | Down | 1.97E-44  | 1.70E-43  |
| Unigene13248  | Potri.006G129100.2 | 1.8717  | 9.9863   | -2.4156 | Down | 1.30E-30  | 8.00E-30  |
| Unigene42091  | Potri.013G140100.1 | 1.5168  | 8.0965   | -2.4163 | Down | 9.67E-17  | 3.80E-16  |
| Unigene28826  | Potri.008G131700.2 | 19.9188 | 106.3481 | -2.4166 | Down | 1.28E-250 | 8.86E-249 |
| Unigene63194  | Potri.004G162800.2 | 2.7763  | 14.8256  | -2.4169 | Down | 1.89E-17  | 7.65E-17  |
| Unigene78328  | Potri.001G050700.4 | 25.92   | 138.4346 | -2.4171 | Down | 5.92E-115 | 1.51E-113 |
| Unigene30567  | Potri.010G106800.3 | 24.4896 | 130.8049 | -2.4172 | Down | 3.58E-181 | 1.65E-179 |
| Unigene30966  | Potri.012G017200.1 | 2.8151  | 15.0379  | -2.4173 | Down | 3.71E-18  | 1.54E-17  |
| Unigene86946  | Potri.009G134300.8 | 26.2792 | 140.3873 | -2.4174 | Down | 1.44E-151 | 5.25E-150 |
| Unigene32449  | Potri.018G090300.1 | 7.8041  | 41.6943  | -2.4175 | Down | 2.06E-136 | 6.53E-135 |
| Unigene41444  | Potri.016G053300.4 | 3.5345  | 18.883   | -2.4175 | Down | 3.74E-119 | 9.99E-118 |
| Unigene49444  | Potri.009G044200.2 | 27.0078 | 144.2854 | -2.4175 | Down | 4.86E-286 | 4.05E-284 |
| Unigene84067  | Potri.003G030900.1 | 10.4439 | 55.8209  | -2.4181 | Down | 5.85E-55  | 6.30E-54  |

|              |                    |         |          |         |      |           |           |
|--------------|--------------------|---------|----------|---------|------|-----------|-----------|
| Unigene21855 | Potri.016G082100.1 | 15.8087 | 84.5086  | -2.4184 | Down | 0         | 0         |
| Unigene41651 | Potri.013G129600.2 | 5.3142  | 28.4105  | -2.4185 | Down | 2.38E-38  | 1.80E-37  |
| Unigene30026 | Potri.008G056500.1 | 4.6515  | 24.8676  | -2.4185 | Down | 2.38E-38  | 1.80E-37  |
| Unigene3830  | Potri.004G172000.1 | 25.9475 | 138.7263 | -2.4186 | Down | 2.16E-112 | 5.35E-111 |
| Unigene69924 | Potri.003G153200.1 | 4.205   | 22.4836  | -2.4187 | Down | 4.72E-39  | 3.62E-38  |
| Unigene28734 | Potri.002G221000.1 | 1.7454  | 9.3324   | -2.4187 | Down | 2.81E-20  | 1.26E-19  |
| Unigene36722 | Potri.015G117200.1 | 22.4269 | 119.9198 | -2.4188 | Down | 3.76E-133 | 1.16E-131 |
| Unigene13470 | Potri.015G130700.4 | 2.9949  | 16.0154  | -2.4189 | Down | 9.37E-40  | 7.30E-39  |
| Unigene42500 | Potri.005G222500.1 | 4.6599  | 24.9242  | -2.4192 | Down | 4.21E-158 | 1.62E-156 |
| Unigene22002 | Potri.016G018900.1 | 2.6233  | 14.034   | -2.4195 | Down | 5.67E-62  | 6.98E-61  |
| Unigene54290 | Potri.014G046000.1 | 4.1603  | 22.2564  | -2.4195 | Down | 1.09E-21  | 5.11E-21  |
| Unigene26270 | Potri.001G242600.1 | 5.8306  | 31.193   | -2.4195 | Down | 7.90E-103 | 1.75E-101 |
| Unigene55588 | Potri.014G153500.1 | 3.6495  | 19.5261  | -2.4196 | Down | 1.45E-42  | 1.21E-41  |
| Unigene20501 | Potri.002G029900.1 | 4.5281  | 24.2269  | -2.4196 | Down | 1.45E-42  | 1.21E-41  |
| Unigene4067  | Potri.017G041700.2 | 28.9974 | 155.1667 | -2.4198 | Down | 0         | 0         |
| Unigene6611  | Potri.005G054700.1 | 2.076   | 11.1087  | -2.4198 | Down | 2.14E-22  | 1.03E-21  |
| Unigene53434 | Potri.019G038200.6 | 5.613   | 30.0414  | -2.4201 | Down | 4.21E-23  | 2.07E-22  |
| Unigene26782 | Potri.018G005600.2 | 18.0759 | 96.7536  | -2.4202 | Down | 4.62E-89  | 8.55E-88  |
| Unigene31949 | Potri.008G138100.2 | 8.997   | 48.1544  | -2.4202 | Down | 3.20E-239 | 2.08E-237 |
| Unigene13201 | Potri.009G134000.1 | 5.1475  | 27.558   | -2.4205 | Down | 8.89E-47  | 8.12E-46  |
| Unigene12554 | Potri.009G040600.1 | 12.2646 | 65.6585  | -2.4205 | Down | 3.46E-136 | 1.09E-134 |
| Unigene11799 | Potri.014G138400.1 | 7.4599  | 39.9387  | -2.4206 | Down | 9.92E-115 | 2.52E-113 |
| Unigene21398 | Potri.006G090000.1 | 7.9898  | 42.7764  | -2.4206 | Down | 0         | 0         |
| Unigene36054 | Potri.018G074000.1 | 9.762   | 52.2722  | -2.4208 | Down | 1.15E-94  | 2.30E-93  |
| Unigene11227 | Potri.008G071900.1 | 1.535   | 8.2213   | -2.4211 | Down | 2.75E-50  | 2.70E-49  |
| Unigene31189 | Potri.016G062100.1 | 8.7616  | 46.9277  | -2.4212 | Down | 2.75E-50  | 2.70E-49  |
| Unigene48277 | Potri.016G006500.1 | 3.8624  | 20.6871  | -2.4212 | Down | 6.36E-26  | 3.42E-25  |
| Unigene30393 | Potri.010G052300.2 | 4.1053  | 21.9881  | -2.4212 | Down | 6.36E-26  | 3.42E-25  |
| Unigene31433 | Potri.006G235700.1 | 5.2429  | 28.0812  | -2.4212 | Down | 6.36E-26  | 3.42E-25  |
| Unigene73599 | Potri.003G015200.1 | 51.5508 | 276.1785 | -2.4215 | Down | 5.74E-205 | 3.07E-203 |
| Unigene33308 | Potri.006G051600.1 | 4.8881  | 26.1892  | -2.4216 | Down | 8.58E-79  | 1.38E-77  |
| Unigene39187 | Potri.001G024600.2 | 2.8632  | 15.3404  | -2.4216 | Down | 4.30E-53  | 4.47E-52  |
| Unigene53268 | Potri.014G195700.1 | 19.4268 | 104.0908 | -2.4217 | Down | 7.22E-106 | 1.65E-104 |
| Unigene30312 | Potri.019G000800.1 | 19.7    | 105.5739 | -2.422  | Down | 1.62E-190 | 7.93E-189 |
| Unigene8452  | Potri.011G066100.1 | 2.4176  | 12.961   | -2.4225 | Down | 7.47E-31  | 4.65E-30  |
| Unigene5602  | Potri.001G149000.1 | 3.8873  | 20.8405  | -2.4225 | Down | 7.47E-31  | 4.65E-30  |
| Unigene20514 | Potri.016G013100.2 | 3.9311  | 21.0775  | -2.4227 | Down | 1.48E-31  | 9.38E-31  |
| Unigene27519 | Potri.003G120300.3 | 12.6065 | 67.6288  | -2.4235 | Down | 3.20E-69  | 4.44E-68  |
| Unigene52295 | Potri.001G451100.1 | 9.8157  | 52.6738  | -2.4239 | Down | 7.92E-75  | 1.20E-73  |

|               |                    |         |          |         |      |           |           |
|---------------|--------------------|---------|----------|---------|------|-----------|-----------|
| Unigene5108   | Potri.018G018400.1 | 15.6155 | 83.7989  | -2.424  | Down | 1.47E-148 | 5.20E-147 |
| Unigene78916  | Potri.006G251900.2 | 8.4275  | 45.2294  | -2.4241 | Down | 2.73E-39  | 2.10E-38  |
| Unigene49532  | Potri.016G079600.1 | 1.8666  | 10.0203  | -2.4244 | Down | 4.22E-42  | 3.48E-41  |
| Unigene89301  | Potri.019G032500.1 | 12.3979 | 66.5567  | -2.4245 | Down | 3.10E-83  | 5.31E-82  |
| Unigene6092   | Potri.003G139600.3 | 10.0156 | 53.7663  | -2.4245 | Down | 4.22E-42  | 3.48E-41  |
| Unigene10903  | Potri.006G014400.1 | 10.2241 | 54.8923  | -2.4246 | Down | 5.35E-253 | 3.74E-251 |
| Unigene76322  | Potri.008G191800.1 | 32.1605 | 172.7071 | -2.425  | Down | 6.67E-137 | 2.12E-135 |
| Unigene796    | Potri.013G003000.2 | 8.8726  | 47.6561  | -2.4252 | Down | 2.67E-145 | 9.18E-144 |
| Unigene34351  | Potri.001G074400.1 | 2.1119  | 11.3429  | -2.4252 | Down | 4.02E-49  | 3.86E-48  |
| Unigene44372  | Potri.016G026800.1 | 3.901   | 20.9562  | -2.4255 | Down | 1.25E-52  | 1.29E-51  |
| Unigene30953  | Potri.004G025900.2 | 9.7473  | 52.3668  | -2.4256 | Down | 4.93E-54  | 5.22E-53  |
| Unigene26502  | Potri.014G022800.1 | 2.9208  | 15.6979  | -2.4261 | Down | 1.89E-62  | 2.35E-61  |
| Unigene11420  | Potri.001G082100.1 | 2.963   | 15.9239  | -2.4261 | Down | 4.78E-61  | 5.79E-60  |
| Unigene914    | Potri.014G157200.3 | 8.8082  | 47.3422  | -2.4262 | Down | 1.21E-126 | 3.48E-125 |
| Unigene760    | Potri.007G028800.1 | 7.1834  | 38.6161  | -2.4265 | Down | 9.25E-205 | 4.94E-203 |
| Unigene39002  | Potri.018G023100.2 | 6.9364  | 37.2947  | -2.4267 | Down | 9.11E-76  | 1.40E-74  |
| Unigene93242  | Potri.005G195700.1 | 81.2452 | 436.9958 | -2.4273 | Down | 0         | 0         |
| Unigene36824  | Potri.004G065800.8 | 49.6217 | 267.124  | -2.4285 | Down | 0         | 0         |
| Unigene113252 | Potri.006G159200.1 | 0.5921  | 3.1893   | -2.4293 | Down | 4.68E-04  | 8.32E-04  |
| Unigene97422  | Potri.005G092500.1 | 0.6573  | 3.5405   | -2.4293 | Down | 5.47E-07  | 1.29E-06  |
| Unigene113745 | Potri.001G150900.1 | 0.5761  | 3.1031   | -2.4293 | Down | 4.68E-04  | 8.32E-04  |
| Unigene13773  | Potri.019G103900.2 | 2.3743  | 12.79    | -2.4294 | Down | 3.78E-45  | 3.33E-44  |
| Unigene101065 | Potri.019G021200.1 | 0.5851  | 3.1518   | -2.4294 | Down | 4.68E-04  | 8.32E-04  |
| Unigene116724 | Potri.019G015000.2 | 0.907   | 4.8857   | -2.4294 | Down | 5.47E-07  | 1.29E-06  |
| Unigene63754  | Potri.018G145800.3 | 4.1444  | 22.3251  | -2.4294 | Down | 8.23E-20  | 3.64E-19  |
| Unigene111946 | Potri.018G130300.1 | 0.6269  | 3.3769   | -2.4294 | Down | 4.68E-04  | 8.32E-04  |
| Unigene41390  | Potri.018G113300.1 | 0.9609  | 5.1761   | -2.4294 | Down | 3.77E-09  | 1.02E-08  |
| Unigene111129 | Potri.018G097600.1 | 0.6487  | 3.4944   | -2.4294 | Down | 4.68E-04  | 8.32E-04  |
| Unigene100510 | Potri.018G096500.1 | 0.6661  | 3.588    | -2.4294 | Down | 4.68E-04  | 8.32E-04  |
| Unigene913    | Potri.018G038300.1 | 2.1295  | 11.4712  | -2.4294 | Down | 1.49E-46  | 1.35E-45  |
| Unigene16034  | Potri.017G130200.1 | 0.6358  | 3.4249   | -2.4294 | Down | 1.56E-05  | 3.24E-05  |
| Unigene108235 | Potri.017G126300.1 | 0.7243  | 3.9015   | -2.4294 | Down | 4.68E-04  | 8.32E-04  |
| Unigene42600  | Potri.017G070100.1 | 2.7542  | 14.8361  | -2.4294 | Down | 5.09E-132 | 1.55E-130 |
| Unigene37065  | Potri.016G135100.1 | 2.5724  | 13.857   | -2.4294 | Down | 3.82E-14  | 1.34E-13  |
| Unigene25370  | Potri.015G147700.2 | 1.519   | 8.1825   | -2.4294 | Down | 1.04E-07  | 2.56E-07  |
| Unigene53717  | Potri.015G147200.1 | 6.7817  | 36.532   | -2.4294 | Down | 6.61E-34  | 4.46E-33  |
| Unigene68094  | Potri.015G017500.1 | 1.4174  | 7.6352   | -2.4294 | Down | 7.46E-15  | 2.70E-14  |
| Unigene99396  | Potri.014G194500.1 | 0.6459  | 3.4792   | -2.4294 | Down | 4.68E-04  | 8.31E-04  |
| Unigene113595 | Potri.014G179100.1 | 0.7257  | 3.9091   | -2.4294 | Down | 8.48E-05  | 1.64E-04  |



|               |                     |        |         |         |      |          |          |
|---------------|---------------------|--------|---------|---------|------|----------|----------|
| Unigene111451 | Potri.014G123800.3  | 1.1206 | 6.0364  | -2.4294 | Down | 2.91E-06 | 6.44E-06 |
| Unigene118541 | Potri.014G053100.1  | 0.5764 | 3.1048  | -2.4294 | Down | 2.91E-06 | 6.44E-06 |
| Unigene101033 | Potri.014G044000.1  | 1.1017 | 5.9345  | -2.4294 | Down | 2.91E-06 | 6.44E-06 |
| Unigene110661 | Potri.014G034100.2  | 0.8289 | 4.465   | -2.4294 | Down | 8.48E-05 | 1.64E-04 |
| Unigene10412  | Potri.013G115000.2  | 1.6268 | 8.7631  | -2.4294 | Down | 2.69E-11 | 8.25E-11 |
| Unigene25576  | Potri.013G095300.1  | 1.0872 | 5.8566  | -2.4294 | Down | 1.39E-10 | 4.11E-10 |
| Unigene27689  | Potri.013G051200.1  | 2.4475 | 13.1841 | -2.4294 | Down | 4.19E-19 | 1.81E-18 |
| Unigene36433  | Potri.013G022200.2  | 1.2716 | 6.8498  | -2.4294 | Down | 1.04E-07 | 2.56E-07 |
| Unigene72651  | Potri.013G001300.1  | 6.635  | 35.7416 | -2.4294 | Down | 1.43E-27 | 8.09E-27 |
| Unigene15058  | Potri.012G051200.1  | 0.8089 | 4.3574  | -2.4294 | Down | 1.04E-07 | 2.56E-07 |
| Unigene43990  | Potri.012G007000.3  | 8.332  | 44.8833 | -2.4294 | Down | 1.05E-76 | 1.64E-75 |
| Unigene102658 | Potri.011G049400.1  | 1.7904 | 9.6444  | -2.4294 | Down | 2.14E-18 | 8.96E-18 |
| Unigene94798  | Potri.011G019600.1  | 0.7836 | 4.2211  | -2.4294 | Down | 8.48E-05 | 1.64E-04 |
| Unigene7357   | Potri.010G189700.1  | 1.1168 | 6.0157  | -2.4294 | Down | 1.97E-08 | 5.13E-08 |
| Unigene2321   | Potri.010G145900.3  | 1.373  | 7.3961  | -2.4294 | Down | 3.82E-14 | 1.34E-13 |
| Unigene43312  | Potri.010G114800.2  | 1.8058 | 9.7276  | -2.4294 | Down | 6.25E-22 | 2.96E-21 |
| Unigene110508 | Potri.010G099300.1  | 0.9991 | 5.3819  | -2.4294 | Down | 1.56E-05 | 3.24E-05 |
| Unigene113908 | Potri.010G059100.1  | 1.0004 | 5.3888  | -2.4294 | Down | 2.91E-06 | 6.44E-06 |
| Unigene19925  | Potri.010G059000.2  | 0.6782 | 3.6532  | -2.4294 | Down | 4.68E-04 | 8.31E-04 |
| Unigene113950 | Potri.009G137800.4  | 1.1389 | 6.1351  | -2.4294 | Down | 5.47E-07 | 1.29E-06 |
| Unigene110986 | Potri.009G105500.4  | 0.6544 | 3.525   | -2.4294 | Down | 4.68E-04 | 8.32E-04 |
| Unigene10090  | Potri.009G101700.1  | 1.0379 | 5.591   | -2.4294 | Down | 1.01E-12 | 3.32E-12 |
| Unigene30465  | Potri.009G064600.3  | 1.1206 | 6.0364  | -2.4294 | Down | 2.91E-06 | 6.44E-06 |
| Unigene31659  | Potri.009G014400.1  | 1.9592 | 10.5537 | -2.4294 | Down | 8.23E-20 | 3.64E-19 |
| Unigene52264  | Potri.008G204000.1  | 0.8811 | 4.7463  | -2.4294 | Down | 1.56E-05 | 3.24E-05 |
| Unigene27840  | Potri.008G101400.1  | 3.8406 | 20.6887 | -2.4294 | Down | 4.83E-43 | 4.06E-42 |
| Unigene113049 | Potri.008G096200.1  | 0.8988 | 4.8416  | -2.4294 | Down | 1.56E-05 | 3.24E-05 |
| Unigene101016 | Potri.008G055800.1  | 0.7936 | 4.275   | -2.4294 | Down | 8.48E-05 | 1.64E-04 |
| Unigene52747  | Potri.008G047200.2  | 0.7993 | 4.3056  | -2.4294 | Down | 7.24E-10 | 2.05E-09 |
| Unigene63300  | Potri.008G009100.1  | 3.1584 | 17.0139 | -2.4294 | Down | 2.84E-16 | 1.10E-15 |
| Unigene116017 | Potri.007G022700.6  | 0.8561 | 4.6114  | -2.4294 | Down | 2.91E-06 | 6.44E-06 |
| Unigene16903  | Potri.007G019500.15 | 2.598  | 13.9948 | -2.4294 | Down | 2.69E-11 | 8.25E-11 |
| Unigene16894  | Potri.007G001500.3  | 0.6243 | 3.3628  | -2.4294 | Down | 4.68E-04 | 8.31E-04 |
| Unigene26403  | Potri.006G254900.5  | 2.426  | 13.0684 | -2.4294 | Down | 1.01E-12 | 3.32E-12 |
| Unigene46799  | Potri.006G193600.2  | 6.7651 | 36.4425 | -2.4294 | Down | 1.43E-27 | 8.09E-27 |
| Unigene102093 | Potri.006G176700.1  | 1.2392 | 6.6753  | -2.4294 | Down | 1.97E-08 | 5.13E-08 |
| Unigene38918  | Potri.006G152700.4  | 1.1111 | 5.985   | -2.4294 | Down | 2.69E-11 | 8.25E-11 |
| Unigene12638  | Potri.006G066100.2  | 0.9816 | 5.2875  | -2.4294 | Down | 1.39E-10 | 4.11E-10 |
| Unigene115038 | Potri.006G044500.2  | 1.5929 | 8.5805  | -2.4294 | Down | 7.24E-10 | 2.05E-09 |

|               |                    |         |          |         |      |          |          |
|---------------|--------------------|---------|----------|---------|------|----------|----------|
| Unigene35660  | Potri.006G013900.1 | 1.7084  | 9.2027   | -2.4294 | Down | 3.82E-14 | 1.34E-13 |
| Unigene4775   | Potri.005G251700.1 | 1.2644  | 6.8111   | -2.4294 | Down | 7.24E-10 | 2.05E-09 |
| Unigene43013  | Potri.005G211100.1 | 1.0856  | 5.8477   | -2.4294 | Down | 4.19E-19 | 1.81E-18 |
| Unigene24724  | Potri.005G144900.1 | 28.1614 | 151.7007 | -2.4294 | Down | 0        | 0        |
| Unigene105125 | Potri.005G088800.1 | 1.6135  | 8.6915   | -2.4294 | Down | 1.96E-13 | 6.68E-13 |
| Unigene14703  | Potri.005G087300.1 | 0.7561  | 4.0728   | -2.4294 | Down | 1.04E-07 | 2.56E-07 |
| Unigene77398  | Potri.004G233800.1 | 8.0735  | 43.4905  | -2.4294 | Down | 1.02E-36 | 7.38E-36 |
| Unigene53432  | Potri.004G211500.3 | 4.8875  | 26.3282  | -2.4294 | Down | 2.82E-28 | 1.63E-27 |
| Unigene72032  | Potri.004G171600.1 | 15.2837 | 82.3307  | -2.4294 | Down | 1.39E-60 | 1.66E-59 |
| Unigene48282  | Potri.004G137100.2 | 2.4632  | 13.2687  | -2.4294 | Down | 2.69E-11 | 8.25E-11 |
| Unigene47448  | Potri.004G129000.1 | 0.8109  | 4.368    | -2.4294 | Down | 1.56E-05 | 3.24E-05 |
| Unigene71103  | Potri.004G124000.2 | 9.7865  | 52.7182  | -2.4294 | Down | 7.93E-39 | 6.04E-38 |
| Unigene16634  | Potri.004G100700.3 | 0.6646  | 3.58     | -2.4294 | Down | 5.47E-07 | 1.29E-06 |
| Unigene49722  | Potri.004G085100.1 | 1.6371  | 8.8188   | -2.4294 | Down | 1.43E-27 | 8.09E-27 |
| Unigene99766  | Potri.004G080200.1 | 0.5874  | 3.1642   | -2.4294 | Down | 1.56E-05 | 3.24E-05 |
| Unigene113663 | Potri.004G056600.2 | 3.4697  | 18.6908  | -2.4294 | Down | 2.14E-18 | 8.96E-18 |
| Unigene20782  | Potri.004G016000.1 | 0.9024  | 4.8611   | -2.4294 | Down | 1.56E-05 | 3.24E-05 |
| Unigene103135 | Potri.003G219800.1 | 0.9853  | 5.3075   | -2.4294 | Down | 2.91E-06 | 6.44E-06 |
| Unigene117841 | Potri.003G185300.1 | 0.5783  | 3.1151   | -2.4294 | Down | 1.56E-05 | 3.24E-05 |
| Unigene50797  | Potri.003G163800.4 | 7.0477  | 37.9646  | -2.4294 | Down | 5.26E-76 | 8.13E-75 |
| Unigene36362  | Potri.003G088900.1 | 0.5641  | 3.0386   | -2.4294 | Down | 5.47E-07 | 1.29E-06 |
| Unigene20378  | Potri.003G044200.3 | 12.947  | 69.7429  | -2.4294 | Down | 5.14E-90 | 9.62E-89 |
| Unigene108533 | Potri.003G005300.1 | 0.7173  | 3.864    | -2.4294 | Down | 4.68E-04 | 8.32E-04 |
| Unigene76299  | Potri.002G238200.1 | 16.7434 | 90.1935  | -2.4294 | Down | 1.68E-72 | 2.45E-71 |
| Unigene113465 | Potri.002G221100.1 | 0.5851  | 3.1518   | -2.4294 | Down | 4.68E-04 | 8.32E-04 |
| Unigene53066  | Potri.002G204700.1 | 0.8881  | 4.784    | -2.4294 | Down | 8.48E-05 | 1.64E-04 |
| Unigene49096  | Potri.002G177900.1 | 3.7589  | 20.2484  | -2.4294 | Down | 2.96E-47 | 2.73E-46 |
| Unigene31610  | Potri.002G154700.1 | 0.8382  | 4.5152   | -2.4294 | Down | 1.56E-05 | 3.24E-05 |
| Unigene117312 | Potri.002G138800.1 | 1.1558  | 6.2259   | -2.4294 | Down | 3.77E-09 | 1.02E-08 |
| Unigene115860 | Potri.002G125400.3 | 1.2392  | 6.6753   | -2.4294 | Down | 1.97E-08 | 5.13E-08 |
| Unigene83408  | Potri.001G455100.1 | 13.1727 | 70.959   | -2.4294 | Down | 2.69E-68 | 3.68E-67 |
| Unigene26841  | Potri.001G387300.1 | 0.8988  | 4.8416   | -2.4294 | Down | 1.56E-05 | 3.24E-05 |
| Unigene19870  | Potri.001G372300.1 | 0.749   | 4.0347   | -2.4294 | Down | 8.48E-05 | 1.64E-04 |
| Unigene117911 | Potri.001G327500.4 | 0.6661  | 3.588    | -2.4294 | Down | 2.91E-06 | 6.44E-06 |
| Unigene35475  | Potri.001G295800.1 | 0.6944  | 3.7406   | -2.4294 | Down | 2.91E-06 | 6.44E-06 |
| Unigene16225  | Potri.001G233300.1 | 0.7038  | 3.7911   | -2.4294 | Down | 4.68E-04 | 8.31E-04 |
| Unigene31530  | Potri.001G224500.1 | 0.6782  | 3.6532   | -2.4294 | Down | 5.47E-07 | 1.29E-06 |
| Unigene102480 | Potri.001G193400.1 | 2.0799  | 11.2041  | -2.4294 | Down | 5.21E-12 | 1.65E-11 |
| Unigene14173  | Potri.001G187300.1 | 0.952   | 5.128    | -2.4294 | Down | 3.77E-09 | 1.02E-08 |

|               |                    |         |         |         |      |           |           |
|---------------|--------------------|---------|---------|---------|------|-----------|-----------|
| Unigene98745  | Potri.001G177300.3 | 0.8846  | 4.765   | -2.4294 | Down | 1.56E-05  | 3.24E-05  |
| Unigene17189  | Potri.001G059300.1 | 3.3839  | 18.2283 | -2.4294 | Down | 1.69E-32  | 1.10E-31  |
| Unigene100771 | Potri.018G032300.2 | 1.4986  | 8.0729  | -2.4295 | Down | 1.04E-07  | 2.56E-07  |
| Unigene100840 | Potri.017G031800.1 | 0.607   | 3.27    | -2.4295 | Down | 1.04E-07  | 2.56E-07  |
| Unigene52598  | Potri.016G024600.1 | 0.8413  | 4.5322  | -2.4295 | Down | 1.04E-07  | 2.56E-07  |
| Unigene37557  | Potri.015G110300.1 | 0.8445  | 4.5493  | -2.4295 | Down | 1.56E-05  | 3.24E-05  |
| Unigene111045 | Potri.015G062900.1 | 1.4659  | 7.8967  | -2.4295 | Down | 1.04E-07  | 2.56E-07  |
| Unigene116387 | Potri.015G004600.1 | 0.9413  | 5.0707  | -2.4295 | Down | 5.47E-07  | 1.29E-06  |
| Unigene103492 | Potri.014G009300.1 | 1.504   | 8.1019  | -2.4295 | Down | 5.21E-12  | 1.65E-11  |
| Unigene78876  | Potri.012G067800.2 | 0.7803  | 4.2035  | -2.4295 | Down | 8.48E-05  | 1.64E-04  |
| Unigene4970   | Potri.010G074700.1 | 3.6246  | 19.5253 | -2.4295 | Down | 2.02E-105 | 4.59E-104 |
| Unigene4423   | Potri.010G066000.1 | 0.9278  | 4.9982  | -2.4295 | Down | 8.48E-05  | 1.64E-04  |
| Unigene17845  | Potri.008G060500.1 | 0.9844  | 5.303   | -2.4295 | Down | 1.04E-07  | 2.56E-07  |
| Unigene6356   | Potri.008G036800.2 | 2.3312  | 12.5579 | -2.4295 | Down | 4.19E-19  | 1.81E-18  |
| Unigene101111 | Potri.008G003200.1 | 0.9688  | 5.2189  | -2.4295 | Down | 1.56E-05  | 3.24E-05  |
| Unigene25110  | Potri.007G068000.1 | 1.1149  | 6.0059  | -2.4295 | Down | 3.77E-09  | 1.02E-08  |
| Unigene115865 | Potri.006G275000.5 | 0.7435  | 4.0052  | -2.4295 | Down | 1.56E-05  | 3.24E-05  |
| Unigene22101  | Potri.005G102700.4 | 2.4566  | 13.2335 | -2.4295 | Down | 1.82E-51  | 1.83E-50  |
| Unigene116617 | Potri.005G005400.7 | 1.2624  | 6.8006  | -2.4295 | Down | 3.77E-09  | 1.02E-08  |
| Unigene113549 | Potri.005G003200.1 | 1.0199  | 5.4941  | -2.4295 | Down | 2.91E-06  | 6.44E-06  |
| Unigene113501 | Potri.004G086400.2 | 0.5828  | 3.1395  | -2.4295 | Down | 4.68E-04  | 8.32E-04  |
| Unigene115422 | Potri.003G221500.3 | 1.2906  | 6.9525  | -2.4295 | Down | 1.97E-08  | 5.13E-08  |
| Unigene102106 | Potri.003G115800.2 | 0.6175  | 3.3266  | -2.4295 | Down | 8.48E-05  | 1.64E-04  |
| Unigene102447 | Potri.003G062500.1 | 0.5828  | 3.1395  | -2.4295 | Down | 2.91E-06  | 6.44E-06  |
| Unigene99960  | Potri.003G018800.3 | 2.1082  | 11.3567 | -2.4295 | Down | 1.39E-10  | 4.11E-10  |
| Unigene28557  | Potri.002G257000.2 | 1.4075  | 7.5821  | -2.4295 | Down | 1.46E-15  | 5.43E-15  |
| Unigene63648  | Potri.002G230200.1 | 1.7268  | 9.3021  | -2.4295 | Down | 9.59E-44  | 8.19E-43  |
| Unigene96666  | Potri.002G204900.1 | 0.6165  | 3.3211  | -2.4295 | Down | 5.47E-07  | 1.29E-06  |
| Unigene9818   | Potri.002G187500.2 | 1.3075  | 7.0435  | -2.4295 | Down | 7.46E-15  | 2.70E-14  |
| Unigene117115 | Potri.002G173800.1 | 1.617   | 8.7107  | -2.4295 | Down | 5.21E-12  | 1.65E-11  |
| Unigene116115 | Potri.002G136900.1 | 1.3321  | 7.1759  | -2.4295 | Down | 3.77E-09  | 1.02E-08  |
| Unigene9248   | Potri.001G292100.1 | 1.7995  | 9.6938  | -2.4295 | Down | 3.77E-09  | 1.02E-08  |
| Unigene48577  | Potri.001G152000.3 | 0.7342  | 3.9552  | -2.4295 | Down | 8.48E-05  | 1.64E-04  |
| Unigene15281  | Potri.001G144700.1 | 1.7149  | 9.238   | -2.4295 | Down | 1.01E-12  | 3.32E-12  |
| Unigene52853  | Potri.001G041600.1 | 1.1409  | 6.146   | -2.4295 | Down | 1.39E-10  | 4.11E-10  |
| Unigene32732  | Potri.018G111200.1 | 3.6102  | 19.4672 | -2.4309 | Down | 2.35E-141 | 7.78E-140 |
| Unigene11207  | Potri.006G061400.1 | 12.4119 | 66.9294 | -2.4309 | Down | 8.75E-274 | 6.81E-272 |
| Unigene32796  | Potri.004G138600.1 | 8.1724  | 44.0683 | -2.4309 | Down | 1.48E-138 | 4.78E-137 |
| Unigene25549  | Potri.009G057500.1 | 16.7356 | 90.2694 | -2.4313 | Down | 3.68E-109 | 8.78E-108 |

|               |                    |          |           |         |      |           |           |
|---------------|--------------------|----------|-----------|---------|------|-----------|-----------|
| Unigene92358  | Potri.009G090700.2 | 22.8074  | 123.0299  | -2.4314 | Down | 7.45E-204 | 3.96E-202 |
| Unigene78649  | Potri.003G029600.1 | 18.6498  | 100.6319  | -2.4319 | Down | 2.37E-85  | 4.19E-84  |
| Unigene80530  | Potri.002G029100.3 | 16.4777  | 88.9239   | -2.4321 | Down | 4.78E-79  | 7.74E-78  |
| Unigene14749  | Potri.009G139600.1 | 13.2131  | 71.325    | -2.4324 | Down | 3.09E-69  | 4.29E-68  |
| Unigene12565  | Potri.014G035700.1 | 6.9883   | 37.7371   | -2.433  | Down | 2.12E-116 | 5.51E-115 |
| Unigene49910  | Potri.017G048400.1 | 2.0419   | 11.0289   | -2.4333 | Down | 1.64E-54  | 1.75E-53  |
| Unigene28056  | Potri.018G109700.5 | 194.0602 | 1048.2677 | -2.4334 | Down | 0         | 0         |
| Unigene71687  | Potri.008G201900.1 | 13.1645  | 71.1121   | -2.4334 | Down | 2.09E-52  | 2.14E-51  |
| Unigene22881  | Potri.014G018000.2 | 3.6767   | 19.863    | -2.4336 | Down | 2.66E-50  | 2.61E-49  |
| Unigene22946  | Potri.009G124600.1 | 2.7303   | 14.7527   | -2.4338 | Down | 1.71E-47  | 1.58E-46  |
| Unigene30669  | Potri.002G179800.1 | 20.7096  | 111.9188  | -2.4341 | Down | 9.79E-133 | 3.00E-131 |
| Unigene33927  | Potri.004G015500.1 | 2.4599   | 13.3049   | -2.4353 | Down | 2.96E-36  | 2.12E-35  |
| Unigene74417  | Potri.010G128600.1 | 15.6138  | 84.4824   | -2.4358 | Down | 2.86E-65  | 3.73E-64  |
| Unigene85266  | Potri.015G085100.3 | 29.1118  | 157.5204  | -2.4359 | Down | 8.40E-160 | 3.26E-158 |
| Unigene3128   | Potri.005G249600.1 | 3.5103   | 18.9978   | -2.4362 | Down | 1.78E-122 | 4.91E-121 |
| Unigene54245  | Potri.003G128500.4 | 2.7292   | 14.7719   | -2.4363 | Down | 2.48E-31  | 1.57E-30  |
| Unigene55229  | Potri.T047200.2    | 2.0978   | 11.3555   | -2.4364 | Down | 1.26E-30  | 7.76E-30  |
| Unigene21970  | Potri.010G015400.1 | 1.8514   | 10.022    | -2.4365 | Down | 1.26E-30  | 7.76E-30  |
| Unigene43245  | Potri.006G100400.1 | 6.7656   | 36.6366   | -2.437  | Down | 3.55E-109 | 8.46E-108 |
| Unigene1817   | Potri.002G045000.1 | 5.5584   | 30.0995   | -2.437  | Down | 1.88E-55  | 2.05E-54  |
| Unigene224    | Potri.001G036800.2 | 4.3016   | 23.294    | -2.437  | Down | 3.55E-109 | 8.46E-108 |
| Unigene34968  | Potri.007G043300.2 | 3.1558   | 17.0941   | -2.4374 | Down | 1.20E-52  | 1.24E-51  |
| Unigene44583  | Potri.008G171400.2 | 10.8527  | 58.8021   | -2.4378 | Down | 1.28E-74  | 1.93E-73  |
| Unigene51052  | Potri.006G111300.1 | 29.4317  | 159.485   | -2.438  | Down | 2.33E-287 | 1.96E-285 |
| Unigene25665  | Potri.018G024600.2 | 3.9578   | 21.4493   | -2.4382 | Down | 5.42E-25  | 2.84E-24  |
| Unigene4237   | Potri.014G047500.1 | 7.2527   | 39.3081   | -2.4382 | Down | 4.08E-71  | 5.83E-70  |
| Unigene24483  | Potri.003G161700.1 | 5.7518   | 31.1717   | -2.4382 | Down | 8.12E-72  | 1.17E-70  |
| Unigene81410  | Potri.001G193000.1 | 18.5029  | 100.3048  | -2.4386 | Down | 5.69E-91  | 1.08E-89  |
| Unigene105949 | Potri.014G144900.1 | 3.6247   | 19.6517   | -2.4387 | Down | 1.40E-23  | 6.98E-23  |
| Unigene51916  | Potri.002G055400.3 | 17.5238  | 95.0039   | -2.4387 | Down | 5.23E-178 | 2.35E-176 |
| Unigene40077  | Potri.016G003000.1 | 4.4537   | 24.149    | -2.4389 | Down | 2.05E-109 | 4.90E-108 |
| Unigene31093  | Potri.003G149300.2 | 7.9865   | 43.3055   | -2.4389 | Down | 3.29E-66  | 4.36E-65  |
| Unigene75100  | Potri.011G127000.3 | 20.4381  | 110.8304  | -2.439  | Down | 9.07E-87  | 1.63E-85  |
| Unigene30498  | Potri.005G027600.2 | 1.8775   | 10.1812   | -2.439  | Down | 7.09E-23  | 3.46E-22  |
| Unigene11038  | Potri.005G004000.1 | 3.0216   | 16.3851   | -2.439  | Down | 1.65E-65  | 2.17E-64  |
| Unigene36097  | Potri.003G056000.1 | 2.7905   | 15.1321   | -2.439  | Down | 7.09E-23  | 3.46E-22  |
| Unigene13115  | Potri.015G101900.1 | 4.7642   | 25.8396   | -2.4393 | Down | 1.15E-84  | 2.01E-83  |
| Unigene33439  | Potri.008G134500.1 | 15.147   | 82.1553   | -2.4393 | Down | 2.21E-228 | 1.34E-226 |
| Unigene44551  | Potri.005G208400.1 | 8.128    | 44.0838   | -2.4393 | Down | 3.25E-105 | 7.36E-104 |

|               |                     |         |          |         |      |           |           |
|---------------|---------------------|---------|----------|---------|------|-----------|-----------|
| Unigene13677  | Potri.003G035900.1  | 1.1822  | 6.4121   | -2.4393 | Down | 3.60E-22  | 1.72E-21  |
| Unigene4865   | Potri.010G167100.10 | 3.7044  | 20.0926  | -2.4394 | Down | 3.60E-22  | 1.72E-21  |
| Unigene113628 | Potri.017G054800.1  | 4.0638  | 22.0471  | -2.4397 | Down | 1.83E-21  | 8.55E-21  |
| Unigene8893   | Potri.007G115500.1  | 3.5523  | 19.2725  | -2.4397 | Down | 1.83E-21  | 8.55E-21  |
| Unigene46314  | Potri.001G399700.1  | 4.1609  | 22.5742  | -2.4397 | Down | 1.83E-21  | 8.55E-21  |
| Unigene915    | Potri.002G092400.1  | 1.762   | 9.5603   | -2.4398 | Down | 1.34E-60  | 1.61E-59  |
| Unigene46174  | Potri.010G080600.1  | 5.812   | 31.5458  | -2.4403 | Down | 8.53E-58  | 9.74E-57  |
| Unigene370    | Potri.019G001800.1  | 5.8472  | 31.7447  | -2.4407 | Down | 7.86E-219 | 4.54E-217 |
| Unigene49509  | Potri.018G015200.3  | 14.2728 | 77.5     | -2.4409 | Down | 2.96E-108 | 6.99E-107 |
| Unigene17599  | Potri.010G205400.1  | 2.1437  | 11.6399  | -2.4409 | Down | 2.41E-19  | 1.05E-18  |
| Unigene23163  | Potri.011G045600.1  | 2.2371  | 12.149   | -2.4411 | Down | 1.71E-36  | 1.23E-35  |
| Unigene406    | Potri.008G166300.1  | 7.7939  | 42.3273  | -2.4412 | Down | 6.29E-141 | 2.07E-139 |
| Unigene49094  | Potri.013G035600.6  | 1.59    | 8.6366   | -2.4414 | Down | 1.23E-18  | 5.20E-18  |
| Unigene24719  | Potri.012G051800.1  | 10.6243 | 57.7251  | -2.4418 | Down | 1.49E-100 | 3.21E-99  |
| Unigene27373  | Potri.005G226300.2  | 8.3901  | 45.5891  | -2.4419 | Down | 3.77E-67  | 5.08E-66  |
| Unigene54400  | Potri.002G139400.1  | 4.9367  | 26.8295  | -2.4422 | Down | 1.11E-33  | 7.43E-33  |
| Unigene44892  | Potri.010G115000.1  | 26.8073 | 145.7084 | -2.4424 | Down | 0         | 0         |
| Unigene45864  | Potri.015G108200.1  | 2.6817  | 14.577   | -2.4425 | Down | 3.20E-17  | 1.28E-16  |
| Unigene115856 | Potri.012G089700.1  | 2.7262  | 14.8191  | -2.4425 | Down | 3.20E-17  | 1.28E-16  |
| Unigene104707 | Potri.007G127800.1  | 0.9421  | 5.1212   | -2.4425 | Down | 3.20E-17  | 1.28E-16  |
| Unigene53149  | Potri.005G121600.2  | 3.537   | 19.2265  | -2.4425 | Down | 3.20E-17  | 1.28E-16  |
| Unigene38766  | Potri.014G014100.1  | 2.3656  | 12.8616  | -2.4428 | Down | 2.83E-32  | 1.83E-31  |
| Unigene733    | Potri.004G048400.1  | 10.4242 | 56.684   | -2.443  | Down | 2.17E-197 | 1.11E-195 |
| Unigene26409  | Potri.013G046900.4  | 1.9582  | 10.6491  | -2.4431 | Down | 1.63E-16  | 6.36E-16  |
| Unigene41811  | Potri.006G246000.1  | 2.2836  | 12.4188  | -2.4431 | Down | 1.63E-16  | 6.36E-16  |
| Unigene24374  | Potri.016G136200.1  | 2.0393  | 11.0917  | -2.4433 | Down | 7.24E-46  | 6.48E-45  |
| Unigene103388 | Potri.011G098300.1  | 1.1085  | 6.0308   | -2.4437 | Down | 8.36E-16  | 3.15E-15  |
| Unigene44314  | Potri.010G021400.3  | 11.6923 | 63.6092  | -2.4437 | Down | 6.00E-88  | 1.10E-86  |
| Unigene30562  | Potri.018G020200.5  | 12.8043 | 69.6667  | -2.4438 | Down | 1.18E-214 | 6.68E-213 |
| Unigene24287  | Potri.006G258300.1  | 2.4499  | 13.3291  | -2.4438 | Down | 3.65E-30  | 2.23E-29  |
| Unigene3815   | Potri.006G168600.1  | 7.9928  | 43.4861  | -2.4438 | Down | 1.84E-44  | 1.59E-43  |
| Unigene48721  | Potri.005G144900.2  | 7.0156  | 38.1696  | -2.4438 | Down | 1.84E-44  | 1.59E-43  |
| Unigene36755  | Potri.003G139600.1  | 8.6743  | 47.1943  | -2.4438 | Down | 9.77E-59  | 1.14E-57  |
| Unigene87948  | Potri.014G172800.3  | 20.4287 | 111.1585 | -2.4439 | Down | 1.43E-128 | 4.18E-127 |
| Unigene34776  | Potri.006G039500.1  | 1.7967  | 9.7768   | -2.444  | Down | 4.91E-58  | 5.63E-57  |
| Unigene35568  | Potri.006G036500.1  | 11.2468 | 61.1981  | -2.444  | Down | 4.91E-58  | 5.63E-57  |
| Unigene17255  | Potri.002G148100.2  | 11.3145 | 61.5691  | -2.444  | Down | 7.58E-86  | 1.35E-84  |
| Unigene21191  | Potri.011G084000.2  | 7.7834  | 42.3633  | -2.4443 | Down | 1.24E-56  | 1.39E-55  |
| Unigene86823  | Potri.014G068400.1  | 2.316   | 12.6071  | -2.4445 | Down | 4.28E-15  | 1.57E-14  |

|               |                     |         |          |         |      |           |           |
|---------------|---------------------|---------|----------|---------|------|-----------|-----------|
| Unigene89592  | Potri.002G055400.7  | 1.9741  | 10.7459  | -2.4445 | Down | 4.28E-15  | 1.57E-14  |
| Unigene95200  | Potri.014G017000.2  | 0.9551  | 5.1992   | -2.4446 | Down | 4.28E-15  | 1.57E-14  |
| Unigene27701  | Potri.011G081200.4  | 44.4221 | 241.8685 | -2.4449 | Down | 0         | 0         |
| Unigene70800  | Potri.007G052500.8  | 20.2271 | 110.1594 | -2.4452 | Down | 1.53E-79  | 2.50E-78  |
| Unigene118724 | Potri.013G001300.1  | 1.4017  | 7.6344   | -2.4453 | Down | 2.20E-14  | 7.79E-14  |
| Unigene34624  | Potri.016G015200.2  | 2.6433  | 14.3971  | -2.4454 | Down | 3.01E-40  | 2.37E-39  |
| Unigene19471  | Potri.004G088700.1  | 1.8195  | 9.9102   | -2.4454 | Down | 2.20E-14  | 7.79E-14  |
| Unigene7368   | Potri.001G412900.11 | 1.3401  | 7.2991   | -2.4454 | Down | 2.20E-14  | 7.78E-14  |
| Unigene63338  | Potri.001G307400.2  | 3.038   | 16.5468  | -2.4454 | Down | 2.20E-14  | 7.78E-14  |
| Unigene54461  | Potri.019G085900.2  | 5.6952  | 31.0247  | -2.4456 | Down | 2.01E-52  | 2.07E-51  |
| Unigene47746  | Potri.001G133800.1  | 2.6607  | 14.4948  | -2.4457 | Down | 1.52E-39  | 1.18E-38  |
| Unigene44287  | Potri.006G126800.1  | 2.7776  | 15.1336  | -2.4458 | Down | 1.21E-26  | 6.68E-26  |
| Unigene16788  | Potri.002G237000.1  | 5.06    | 27.5689  | -2.4458 | Down | 1.21E-26  | 6.68E-26  |
| Unigene119160 | Potri.002G160200.1  | 2.1758  | 11.8546  | -2.4458 | Down | 1.21E-26  | 6.68E-26  |
| Unigene44208  | Potri.001G193700.1  | 1.4252  | 7.765    | -2.4458 | Down | 1.21E-26  | 6.68E-26  |
| Unigene36048  | Potri.018G113600.2  | 10.8169 | 58.9383  | -2.4459 | Down | 6.95E-64  | 8.86E-63  |
| Unigene56614  | Potri.006G177000.1  | 2.4961  | 13.6     | -2.4459 | Down | 1.21E-26  | 6.68E-26  |
| Unigene8982   | Potri.014G157500.1  | 5.0248  | 27.3801  | -2.446  | Down | 7.65E-39  | 5.83E-38  |
| Unigene42693  | Potri.002G106500.1  | 11.0834 | 60.4007  | -2.4462 | Down | 0         | 0         |
| Unigene23932  | Potri.T036000.1     | 1.0361  | 5.6469   | -2.4463 | Down | 1.13E-13  | 3.88E-13  |
| Unigene25609  | Potri.014G043900.1  | 2.4769  | 13.4997  | -2.4463 | Down | 1.76E-62  | 2.18E-61  |
| Unigene46996  | Potri.009G057500.1  | 5.5138  | 30.0515  | -2.4463 | Down | 6.15E-26  | 3.31E-25  |
| Unigene2746   | Potri.011G149400.1  | 0.9785  | 5.3332   | -2.4464 | Down | 1.13E-13  | 3.88E-13  |
| Unigene34279  | Potri.017G118900.2  | 6.7123  | 36.5911  | -2.4466 | Down | 4.12E-121 | 1.12E-119 |
| Unigene41029  | Potri.008G213900.1  | 9.1541  | 49.9003  | -2.4466 | Down | 1.29E-49  | 1.25E-48  |
| Unigene48201  | Potri.008G110300.2  | 9.7847  | 53.3425  | -2.4467 | Down | 7.87E-97  | 1.61E-95  |
| Unigene46181  | Potri.004G173500.2  | 6.9849  | 38.0781  | -2.4467 | Down | 1.95E-37  | 1.44E-36  |
| Unigene21654  | Potri.010G163800.1  | 2.7387  | 14.9337  | -2.447  | Down | 2.60E-118 | 6.88E-117 |
| Unigene52254  | Potri.001G403700.3  | 1.5872  | 8.6569   | -2.4474 | Down | 5.80E-13  | 1.93E-12  |
| Unigene43490  | Potri.001G079500.1  | 4.6624  | 25.4297  | -2.4474 | Down | 6.97E-82  | 1.17E-80  |
| Unigene54968  | Potri.010G164100.3  | 5.8894  | 32.1319  | -2.4478 | Down | 1.42E-57  | 1.62E-56  |
| Unigene7524   | Potri.019G109400.1  | 3.6106  | 19.7005  | -2.4479 | Down | 1.58E-90  | 2.98E-89  |
| Unigene46299  | Potri.001G090100.1  | 4.0858  | 22.2936  | -2.4479 | Down | 8.03E-24  | 4.05E-23  |
| Unigene21232  | Potri.014G143600.1  | 3.1153  | 16.9993  | -2.448  | Down | 3.46E-134 | 1.07E-132 |
| Unigene22299  | Potri.014G089400.1  | 3.3591  | 18.3301  | -2.4481 | Down | 7.15E-57  | 8.03E-56  |
| Unigene86776  | Potri.013G061800.6  | 9.2639  | 50.5598  | -2.4483 | Down | 3.60E-56  | 3.98E-55  |
| Unigene22326  | Potri.005G147800.1  | 13.8789 | 75.7496  | -2.4483 | Down | 6.45E-208 | 3.50E-206 |
| Unigene45676  | Potri.011G058800.1  | 7.0121  | 38.2738  | -2.4484 | Down | 1.19E-120 | 3.23E-119 |
| Unigene100269 | Potri.008G148100.1  | 1.04    | 5.6767   | -2.4485 | Down | 2.99E-12  | 9.61E-12  |

|               |                    |          |          |         |      |           |           |
|---------------|--------------------|----------|----------|---------|------|-----------|-----------|
| Unigene12780  | Potri.001G423700.1 | 3.3193   | 18.1227  | -2.4488 | Down | 5.32E-44  | 4.57E-43  |
| Unigene98724  | Potri.016G114600.1 | 1.1119   | 6.0713   | -2.449  | Down | 3.22E-33  | 2.14E-32  |
| Unigene16827  | Potri.005G234900.1 | 8.9818   | 49.0555  | -2.4493 | Down | 2.30E-53  | 2.41E-52  |
| Unigene123    | Potri.014G099700.1 | 5.0665   | 27.6752  | -2.4495 | Down | 0         | 0         |
| Unigene706    | Potri.005G123000.1 | 5.3285   | 29.1066  | -2.4495 | Down | 2.17E-124 | 6.09E-123 |
| Unigene52592  | Potri.009G032400.1 | 1.1708   | 6.3972   | -2.4499 | Down | 1.54E-11  | 4.78E-11  |
| Unigene40984  | Potri.009G008200.1 | 2.2704   | 12.405   | -2.4499 | Down | 1.54E-11  | 4.78E-11  |
| Unigene47928  | Potri.002G113600.2 | 2.2606   | 12.3513  | -2.4499 | Down | 1.54E-11  | 4.78E-11  |
| Unigene80198  | Potri.017G129100.8 | 56.0248  | 306.1885 | -2.4503 | Down | 7.14E-268 | 5.41E-266 |
| Unigene7393   | Potri.004G084100.1 | 3.0957   | 16.9201  | -2.4504 | Down | 4.16E-31  | 2.60E-30  |
| Unigene79404  | Potri.002G040700.1 | 103.5756 | 566.2461 | -2.4507 | Down | 0         | 0         |
| Unigene95685  | Potri.010G146000.2 | 6.0897   | 33.2963  | -2.4509 | Down | 2.10E-30  | 1.29E-29  |
| Unigene115953 | Potri.008G132500.1 | 4.924    | 26.9228  | -2.4509 | Down | 2.10E-30  | 1.29E-29  |
| Unigene12211  | Potri.009G115300.1 | 11.3129  | 61.8587  | -2.451  | Down | 2.09E-173 | 9.04E-172 |
| Unigene20331  | Potri.014G120100.2 | 1.8161   | 9.9334   | -2.4514 | Down | 7.99E-11  | 2.39E-10  |
| Unigene29902  | Potri.003G179900.1 | 1.2595   | 6.8889   | -2.4514 | Down | 7.99E-11  | 2.39E-10  |
| Unigene3867   | Potri.014G140700.1 | 2.309    | 12.6296  | -2.4515 | Down | 7.99E-11  | 2.39E-10  |
| Unigene30527  | Potri.008G062400.2 | 4.5317   | 24.7871  | -2.4515 | Down | 2.72E-20  | 1.22E-19  |
| Unigene24576  | Potri.007G037700.1 | 14.2616  | 78.0066  | -2.4515 | Down | 3.29E-95  | 6.61E-94  |
| Unigene16190  | Potri.009G000100.2 | 5.211    | 28.5138  | -2.452  | Down | 5.38E-29  | 3.18E-28  |
| Unigene100789 | Potri.002G090100.1 | 0.8664   | 4.7407   | -2.452  | Down | 5.38E-29  | 3.18E-28  |
| Unigene49031  | Potri.014G149800.1 | 17.441   | 95.4399  | -2.4521 | Down | 4.84E-147 | 1.69E-145 |
| Unigene39282  | Potri.002G206700.1 | 7.5906   | 41.5392  | -2.4522 | Down | 2.16E-110 | 5.25E-109 |
| Unigene5388   | Potri.005G209800.1 | 1.2652   | 6.9247   | -2.4524 | Down | 1.38E-19  | 6.07E-19  |
| Unigene22919  | Potri.011G154300.1 | 2.2046   | 12.0684  | -2.4526 | Down | 2.72E-28  | 1.57E-27  |
| Unigene44170  | Potri.010G251300.1 | 6.3018   | 34.4969  | -2.4526 | Down | 5.23E-55  | 5.65E-54  |
| Unigene29054  | Potri.002G073400.1 | 21.2593  | 116.3772 | -2.4526 | Down | 0         | 0         |
| Unigene32981  | Potri.011G052600.1 | 3.4547   | 18.9125  | -2.4527 | Down | 8.82E-179 | 3.98E-177 |
| Unigene103182 | Potri.017G129000.7 | 1.7553   | 9.6129   | -2.4533 | Down | 7.06E-19  | 3.01E-18  |
| Unigene118760 | Potri.015G135300.3 | 0.9248   | 5.0647   | -2.4533 | Down | 4.14E-10  | 1.19E-09  |
| Unigene17831  | Potri.010G002300.1 | 3.6809   | 20.1587  | -2.4533 | Down | 6.08E-45  | 5.33E-44  |
| Unigene36989  | Potri.005G226500.1 | 1.0433   | 5.714    | -2.4533 | Down | 4.14E-10  | 1.19E-09  |
| Unigene34294  | Potri.005G191800.1 | 1.3543   | 7.4169   | -2.4533 | Down | 7.06E-19  | 3.01E-18  |
| Unigene23167  | Potri.004G142100.1 | 3.7676   | 20.6338  | -2.4533 | Down | 6.08E-45  | 5.33E-44  |
| Unigene49723  | Potri.003G085600.5 | 1.1477   | 6.2854   | -2.4533 | Down | 4.14E-10  | 1.19E-09  |
| Unigene56484  | Potri.001G161000.1 | 3.7613   | 20.5991  | -2.4533 | Down | 7.06E-19  | 3.01E-18  |
| Unigene13907  | Potri.003G034900.3 | 6.8281   | 37.4037  | -2.4536 | Down | 1.40E-146 | 4.86E-145 |
| Unigene36474  | Potri.008G170100.1 | 22.2761  | 122.044  | -2.4538 | Down | 9.50E-95  | 1.90E-93  |
| Unigene82517  | Potri.009G076200.1 | 28.3306  | 155.2192 | -2.4539 | Down | 3.50E-145 | 1.20E-143 |

|               |                    |         |          |         |      |           |           |
|---------------|--------------------|---------|----------|---------|------|-----------|-----------|
| Unigene119558 | Potri.010G014000.1 | 2.0539  | 11.2551  | -2.4541 | Down | 3.71E-60  | 4.43E-59  |
| Unigene100129 | Potri.010G131000.1 | 1.8855  | 10.3333  | -2.4543 | Down | 3.60E-18  | 1.50E-17  |
| Unigene7804   | Potri.002G160300.1 | 4.0382  | 22.1313  | -2.4543 | Down | 5.10E-151 | 1.84E-149 |
| Unigene13036  | Potri.010G018800.2 | 3.1846  | 17.455   | -2.4545 | Down | 1.86E-59  | 2.20E-58  |
| Unigene21360  | Potri.001G123700.1 | 4.7023  | 25.7741  | -2.4545 | Down | 6.05E-257 | 4.34E-255 |
| Unigene20445  | Potri.009G089600.1 | 1.2594  | 6.9037   | -2.4546 | Down | 3.54E-26  | 1.92E-25  |
| Unigene29092  | Potri.002G201400.4 | 3.2779  | 17.9679  | -2.4546 | Down | 4.78E-133 | 1.47E-131 |
| Unigene12569  | Potri.015G116700.2 | 2.079   | 11.3968  | -2.4547 | Down | 3.54E-26  | 1.92E-25  |
| Unigene86981  | Potri.008G063900.1 | 8.2083  | 44.997   | -2.4547 | Down | 8.48E-51  | 8.42E-50  |
| Unigene19709  | Potri.004G039500.1 | 5.5783  | 30.5874  | -2.455  | Down | 4.27E-50  | 4.18E-49  |
| Unigene42295  | Potri.008G128800.1 | 2.088   | 11.4523  | -2.4554 | Down | 1.84E-17  | 7.42E-17  |
| Unigene35171  | Potri.004G203300.1 | 1.2103  | 6.6383   | -2.4554 | Down | 2.16E-09  | 5.95E-09  |
| Unigene64418  | Potri.003G101700.2 | 11.4157 | 62.6126  | -2.4554 | Down | 8.73E-137 | 2.77E-135 |
| Unigene45843  | Potri.003G031200.1 | 1.0602  | 5.8149   | -2.4554 | Down | 2.16E-09  | 5.95E-09  |
| Unigene113702 | Potri.002G043500.1 | 1.5903  | 8.7224   | -2.4554 | Down | 2.16E-09  | 5.95E-09  |
| Unigene60807  | Potri.004G033600.2 | 10.2652 | 56.3099  | -2.4556 | Down | 2.17E-96  | 4.43E-95  |
| Unigene74218  | Potri.009G137200.2 | 7.4599  | 40.9328  | -2.456  | Down | 9.35E-33  | 6.13E-32  |
| Unigene25077  | Potri.005G034100.1 | 4.4704  | 24.5325  | -2.4562 | Down | 9.09E-25  | 4.72E-24  |
| Unigene104082 | Potri.001G274500.1 | 2.4137  | 13.2469  | -2.4563 | Down | 2.41E-86  | 4.31E-85  |
| Unigene11454  | Potri.013G152400.1 | 4.9778  | 27.3216  | -2.4565 | Down | 9.02E-109 | 2.14E-107 |
| Unigene10842  | Potri.011G002600.1 | 6.3493  | 34.8519  | -2.4566 | Down | 5.72E-215 | 3.23E-213 |
| Unigene82728  | Potri.008G080200.1 | 24.9609 | 137.0575 | -2.457  | Down | 4.35E-129 | 1.28E-127 |
| Unigene18832  | Potri.001G049700.1 | 1.3492  | 7.4087   | -2.4571 | Down | 4.61E-24  | 2.34E-23  |
| Unigene38895  | Potri.015G042800.6 | 13.0232 | 71.516   | -2.4572 | Down | 2.69E-76  | 4.17E-75  |
| Unigene94750  | Potri.010G001700.2 | 1.728   | 9.4901   | -2.4573 | Down | 2.39E-31  | 1.51E-30  |
| Unigene23298  | Potri.001G081900.1 | 2.0666  | 11.3496  | -2.4573 | Down | 2.39E-31  | 1.51E-30  |
| Unigene24039  | Potri.003G135000.1 | 8.6581  | 47.556   | -2.4575 | Down | 7.16E-164 | 2.89E-162 |
| Unigene99439  | Potri.003G076700.1 | 0.7229  | 3.9718   | -2.4579 | Down | 1.13E-08  | 2.97E-08  |
| Unigene117049 | Potri.002G042800.1 | 1.0875  | 5.9751   | -2.4579 | Down | 1.13E-08  | 2.97E-08  |
| Unigene28292  | Potri.019G001500.1 | 2.5202  | 13.8476  | -2.458  | Down | 4.80E-16  | 1.83E-15  |
| Unigene37791  | Potri.008G174500.1 | 1.2475  | 6.8543   | -2.458  | Down | 1.13E-08  | 2.97E-08  |
| Unigene99479  | Potri.008G105400.1 | 0.7566  | 4.1571   | -2.458  | Down | 1.13E-08  | 2.97E-08  |
| Unigene87105  | Potri.007G034500.1 | 5.9967  | 32.9493  | -2.458  | Down | 6.43E-38  | 4.80E-37  |
| Unigene16045  | Potri.006G184800.3 | 3.2434  | 17.8213  | -2.458  | Down | 4.80E-16  | 1.83E-15  |
| Unigene105613 | Potri.001G013800.5 | 1.2774  | 7.0186   | -2.458  | Down | 1.13E-08  | 2.97E-08  |
| Unigene24096  | Potri.009G100200.1 | 5.9124  | 32.4902  | -2.4582 | Down | 1.04E-109 | 2.49E-108 |
| Unigene1820   | Potri.003G030900.1 | 9.256   | 50.8696  | -2.4583 | Down | 1.73E-123 | 4.81E-122 |
| Unigene19483  | Potri.004G177700.1 | 6.8987  | 37.9177  | -2.4585 | Down | 1.76E-44  | 1.53E-43  |
| Unigene7996   | Potri.005G164100.6 | 2.9526  | 16.2299  | -2.4586 | Down | 3.25E-37  | 2.38E-36  |



|               |                    |         |          |         |      |           |           |
|---------------|--------------------|---------|----------|---------|------|-----------|-----------|
| Unigene44703  | Potri.003G117000.2 | 5.1207  | 28.1485  | -2.4586 | Down | 1.52E-65  | 1.99E-64  |
| Unigene40196  | Potri.006G043100.1 | 3.3595  | 18.4685  | -2.4587 | Down | 6.11E-30  | 3.70E-29  |
| Unigene5987   | Potri.005G154500.1 | 11.147  | 61.2786  | -2.4587 | Down | 2.71E-58  | 3.13E-57  |
| Unigene43229  | Potri.017G088900.2 | 9.7055  | 53.3752  | -2.4593 | Down | 1.28E-223 | 7.55E-222 |
| Unigene31920  | Potri.018G099400.8 | 5.5777  | 30.6784  | -2.4595 | Down | 5.48E-236 | 3.48E-234 |
| Unigene18562  | Potri.017G141000.3 | 2.1346  | 11.7409  | -2.4595 | Down | 3.09E-29  | 1.84E-28  |
| Unigene84513  | Potri.011G091200.1 | 46.6579 | 256.6668 | -2.4597 | Down | 6.90E-255 | 4.89E-253 |
| Unigene86565  | Potri.004G158200.1 | 40.254  | 221.4828 | -2.46   | Down | 5.03E-239 | 3.26E-237 |
| Unigene49430  | Potri.014G133000.3 | 4.9289  | 27.125   | -2.4603 | Down | 1.56E-28  | 9.09E-28  |
| Unigene47820  | Potri.003G098800.2 | 2.5532  | 14.0529  | -2.4605 | Down | 4.17E-35  | 2.90E-34  |
| Unigene39609  | Potri.005G035600.1 | 2.5208  | 13.876   | -2.4606 | Down | 3.13E-48  | 2.95E-47  |
| Unigene37856  | Potri.002G216200.2 | 14.1286 | 77.7827  | -2.4608 | Down | 4.42E-147 | 1.55E-145 |
| Unigene40316  | Potri.001G161000.1 | 0.5942  | 3.2717   | -2.461  | Down | 5.91E-08  | 1.49E-07  |
| Unigene29238  | Potri.008G062700.1 | 2.7018  | 14.8774  | -2.4611 | Down | 7.92E-28  | 4.52E-27  |
| Unigene51154  | Potri.006G131400.7 | 1.0006  | 5.5097   | -2.4611 | Down | 1.26E-14  | 4.51E-14  |
| Unigene38926  | Potri.003G201400.1 | 1.502   | 8.2708   | -2.4611 | Down | 1.26E-14  | 4.51E-14  |
| Unigene109842 | Potri.003G069900.5 | 3.0798  | 16.9589  | -2.4611 | Down | 1.26E-14  | 4.51E-14  |
| Unigene9897   | Potri.003G019100.1 | 0.9483  | 5.2218   | -2.4611 | Down | 5.91E-08  | 1.49E-07  |
| Unigene27509  | Potri.002G230000.1 | 1.5259  | 8.4024   | -2.4611 | Down | 5.91E-08  | 1.49E-07  |
| Unigene103649 | Potri.018G064700.2 | 0.5632  | 3.1015   | -2.4612 | Down | 5.91E-08  | 1.49E-07  |
| Unigene10326  | Potri.017G055600.1 | 1.2961  | 7.1371   | -2.4612 | Down | 5.91E-08  | 1.49E-07  |
| Unigene35798  | Potri.015G071500.1 | 1.2364  | 6.8085   | -2.4612 | Down | 1.26E-14  | 4.51E-14  |
| Unigene5395   | Potri.014G014100.1 | 1.3113  | 7.2208   | -2.4612 | Down | 1.26E-14  | 4.51E-14  |
| Unigene119466 | Potri.009G047700.2 | 0.8079  | 4.4489   | -2.4612 | Down | 1.26E-14  | 4.51E-14  |
| Unigene21734  | Potri.008G193500.1 | 9.0603  | 49.9008  | -2.4614 | Down | 2.35E-157 | 8.97E-156 |
| Unigene22519  | Potri.008G062400.2 | 7.9887  | 44.0037  | -2.4616 | Down | 4.74E-105 | 1.07E-103 |
| Unigene71086  | Potri.018G105300.3 | 9.7865  | 53.9118  | -2.4617 | Down | 2.88E-40  | 2.27E-39  |
| Unigene92298  | Potri.011G138200.1 | 19.0891 | 105.1527 | -2.4617 | Down | 1.45E-175 | 6.39E-174 |
| Unigene35725  | Potri.013G040700.3 | 4.9285  | 27.1522  | -2.4618 | Down | 1.06E-33  | 7.13E-33  |
| Unigene92030  | Potri.004G209700.3 | 74.351  | 409.604  | -2.4618 | Down | 0         | 0         |
| Unigene110811 | Potri.015G136900.2 | 11.553  | 63.6562  | -2.462  | Down | 1.11E-52  | 1.14E-51  |
| Unigene47965  | Potri.003G217000.6 | 4.8895  | 26.9406  | -2.462  | Down | 4.01E-27  | 2.24E-26  |
| Unigene47263  | Potri.002G238200.1 | 19.9509 | 109.9252 | -2.462  | Down | 1.20E-135 | 3.77E-134 |
| Unigene42914  | Potri.018G087300.3 | 5.6319  | 31.0341  | -2.4622 | Down | 1.44E-90  | 2.72E-89  |
| Unigene38007  | Potri.014G148500.1 | 1.5517  | 8.5514   | -2.4623 | Down | 1.56E-20  | 7.07E-20  |
| Unigene43122  | Potri.013G014100.1 | 7.5503  | 41.6105  | -2.4623 | Down | 4.57E-172 | 1.96E-170 |
| Unigene5843   | Potri.013G008700.1 | 4.1622  | 22.9383  | -2.4623 | Down | 1.56E-20  | 7.07E-20  |
| Unigene21029  | Potri.015G028300.2 | 8.2185  | 45.2935  | -2.4624 | Down | 1.45E-39  | 1.13E-38  |
| Unigene13857  | Potri.011G067300.4 | 3.9226  | 21.6208  | -2.4625 | Down | 2.53E-83  | 4.34E-82  |

|               |                    |         |          |         |      |           |           |
|---------------|--------------------|---------|----------|---------|------|-----------|-----------|
| Unigene13855  | Potri.007G100200.1 | 15.4179 | 84.994   | -2.4628 | Down | 1.30E-213 | 7.29E-212 |
| Unigene14029  | Potri.002G239600.1 | 1.0952  | 6.0382   | -2.4629 | Down | 6.46E-14  | 2.25E-13  |
| Unigene116027 | Potri.009G115400.5 | 4.158   | 22.9253  | -2.463  | Down | 2.03E-26  | 1.11E-25  |
| Unigene75293  | Potri.001G460400.1 | 17.2934 | 95.3485  | -2.463  | Down | 4.46E-76  | 6.90E-75  |
| Unigene32951  | Potri.003G174700.1 | 7.5684  | 41.7342  | -2.4632 | Down | 5.58E-205 | 2.99E-203 |
| Unigene6443   | Potri.017G048400.2 | 1.9148  | 10.562   | -2.4636 | Down | 1.98E-56  | 2.20E-55  |
| Unigene104799 | Potri.006G079700.2 | 1.227   | 6.768    | -2.4636 | Down | 7.95E-20  | 3.52E-19  |
| Unigene25388  | Potri.006G145100.1 | 3.1717  | 17.4956  | -2.4637 | Down | 7.95E-20  | 3.52E-19  |
| Unigene32037  | Potri.001G280100.1 | 1.2221  | 6.7414   | -2.4637 | Down | 7.95E-20  | 3.52E-19  |
| Unigene93163  | Potri.015G027000.2 | 32.05   | 176.8149 | -2.4638 | Down | 0         | 0         |
| Unigene76379  | Potri.005G114800.1 | 9.5725  | 52.8098  | -2.4638 | Down | 5.10E-44  | 4.37E-43  |
| Unigene12568  | Potri.012G050500.1 | 5.5892  | 30.8455  | -2.4643 | Down | 4.95E-109 | 1.18E-107 |
| Unigene43337  | Potri.003G181400.1 | 6.8538  | 37.8243  | -2.4643 | Down | 4.95E-109 | 1.18E-107 |
| Unigene23892  | Potri.001G182900.2 | 3.1923  | 17.6187  | -2.4644 | Down | 2.57E-43  | 2.17E-42  |
| Unigene36086  | Potri.004G065800.8 | 9.8556  | 54.397   | -2.4645 | Down | 3.57E-49  | 3.43E-48  |
| Unigene25049  | Potri.019G095500.1 | 0.9296  | 5.1327   | -2.465  | Down | 3.12E-07  | 7.46E-07  |
| Unigene106730 | Potri.018G100600.3 | 0.7156  | 3.9511   | -2.465  | Down | 3.12E-07  | 7.46E-07  |
| Unigene106318 | Potri.018G021700.1 | 0.8087  | 4.465    | -2.465  | Down | 3.12E-07  | 7.46E-07  |
| Unigene14007  | Potri.013G041200.1 | 0.8406  | 4.6411   | -2.465  | Down | 3.12E-07  | 7.46E-07  |
| Unigene34000  | Potri.017G071400.1 | 3.7047  | 20.4554  | -2.4651 | Down | 5.02E-66  | 6.63E-65  |
| Unigene106782 | Potri.011G085200.1 | 0.6558  | 3.6211   | -2.4651 | Down | 3.12E-07  | 7.46E-07  |
| Unigene20684  | Potri.008G192200.2 | 1.7149  | 9.4689   | -2.4651 | Down | 3.32E-13  | 1.12E-12  |
| Unigene31227  | Potri.006G153700.1 | 2.9544  | 16.3128  | -2.4651 | Down | 4.05E-19  | 1.74E-18  |
| Unigene115547 | Potri.006G113600.2 | 1.0219  | 5.6424   | -2.4651 | Down | 3.12E-07  | 7.46E-07  |
| Unigene96560  | Potri.002G110100.1 | 0.6417  | 3.5432   | -2.4651 | Down | 3.12E-07  | 7.46E-07  |
| Unigene100993 | Potri.002G106600.1 | 0.6751  | 3.7276   | -2.4651 | Down | 3.12E-07  | 7.46E-07  |
| Unigene14525  | Potri.001G391400.4 | 0.9688  | 5.3493   | -2.4651 | Down | 3.12E-07  | 7.46E-07  |
| Unigene115519 | Potri.001G048900.1 | 1.0254  | 5.6618   | -2.4651 | Down | 3.12E-07  | 7.46E-07  |
| Unigene47890  | Potri.010G201100.1 | 7.4482  | 41.133   | -2.4653 | Down | 1.50E-94  | 3.00E-93  |
| Unigene30822  | Potri.002G064900.1 | 3.5924  | 19.8456  | -2.4658 | Down | 4.75E-36  | 3.38E-35  |
| Unigene28778  | Potri.006G004300.1 | 12.9905 | 71.7791  | -2.4661 | Down | 1.29E-75  | 1.97E-74  |
| Unigene1061   | Potri.001G075600.1 | 17.5611 | 97.0463  | -2.4663 | Down | 6.56E-273 | 5.07E-271 |
| Unigene1477   | Potri.012G054300.1 | 3.929   | 21.7143  | -2.4664 | Down | 4.50E-58  | 5.17E-57  |
| Unigene1712   | Potri.002G249300.1 | 16.6413 | 91.9795  | -2.4665 | Down | 1.24E-192 | 6.18E-191 |
| Unigene105343 | Potri.010G062400.1 | 1.9278  | 10.6559  | -2.4666 | Down | 2.06E-18  | 8.66E-18  |
| Unigene119339 | Potri.007G049000.6 | 2.4617  | 13.6065  | -2.4666 | Down | 2.40E-35  | 1.67E-34  |
| Unigene22396  | Potri.015G112600.1 | 4.9517  | 27.3718  | -2.4667 | Down | 4.63E-80  | 7.60E-79  |
| Unigene41775  | Potri.010G052200.1 | 3.3909  | 18.7467  | -2.4669 | Down | 1.77E-29  | 1.06E-28  |
| Unigene22656  | Potri.005G252800.1 | 7.5599  | 41.8007  | -2.4671 | Down | 2.39E-90  | 4.50E-89  |

|               |                    |          |          |         |      |           |           |
|---------------|--------------------|----------|----------|---------|------|-----------|-----------|
| Unigene83421  | Potri.006G063000.1 | 49.0857  | 271.4369 | -2.4672 | Down | 8.75E-261 | 6.41E-259 |
| Unigene102248 | Potri.018G143700.1 | 0.7782   | 4.3036   | -2.4673 | Down | 1.71E-12  | 5.57E-12  |
| Unigene48021  | Potri.017G135300.1 | 1.3165   | 7.2806   | -2.4673 | Down | 1.71E-12  | 5.57E-12  |
| Unigene70171  | Potri.008G214300.4 | 8.4953   | 46.9781  | -2.4673 | Down | 1.73E-95  | 3.47E-94  |
| Unigene36768  | Potri.015G130700.4 | 1.9227   | 10.6332  | -2.4674 | Down | 1.71E-12  | 5.57E-12  |
| Unigene116685 | Potri.011G068100.4 | 1.7058   | 9.4337   | -2.4674 | Down | 1.71E-12  | 5.57E-12  |
| Unigene24697  | Potri.004G025900.2 | 4.7616   | 26.3341  | -2.4674 | Down | 1.34E-23  | 6.72E-23  |
| Unigene11088  | Potri.003G000500.2 | 3.2911   | 18.2015  | -2.4674 | Down | 1.21E-34  | 8.30E-34  |
| Unigene32999  | Potri.014G148900.2 | 8.8146   | 48.7576  | -2.4677 | Down | 6.00E-220 | 3.49E-218 |
| Unigene912    | Potri.017G007500.1 | 2.5894   | 14.325   | -2.4678 | Down | 4.34E-94  | 8.57E-93  |
| Unigene44102  | Potri.008G081400.1 | 1.4936   | 8.2632   | -2.4679 | Down | 8.98E-29  | 5.26E-28  |
| Unigene72289  | Potri.002G236200.1 | 118.0549 | 653.1071 | -2.4679 | Down | 0         | 0         |
| Unigene88565  | Potri.T051500.1    | 65.3852  | 361.7864 | -2.4681 | Down | 0         | 0         |
| Unigene10645  | Potri.019G071400.2 | 11.3257  | 62.6685  | -2.4681 | Down | 0         | 0         |
| Unigene41418  | Potri.016G032700.1 | 0.8814   | 4.8775   | -2.4683 | Down | 1.05E-17  | 4.30E-17  |
| Unigene32936  | Potri.005G237700.1 | 1.3838   | 7.6576   | -2.4683 | Down | 6.11E-34  | 4.12E-33  |
| Unigene13543  | Potri.012G122200.1 | 3.5179   | 19.4696  | -2.4684 | Down | 2.88E-55  | 3.12E-54  |
| Unigene13218  | Potri.008G161100.4 | 5.0922   | 28.1826  | -2.4684 | Down | 3.49E-146 | 1.21E-144 |
| Unigene45822  | Potri.003G194000.6 | 16.2588  | 89.9874  | -2.4685 | Down | 1.47E-76  | 2.30E-75  |
| Unigene52547  | Potri.012G103300.1 | 2.4584   | 13.6082  | -2.4687 | Down | 6.82E-23  | 3.33E-22  |
| Unigene38729  | Potri.011G167000.9 | 1.9631   | 10.8668  | -2.4687 | Down | 6.82E-23  | 3.33E-22  |
| Unigene80946  | Potri.007G028800.1 | 12.9285  | 71.5649  | -2.4687 | Down | 1.45E-65  | 1.90E-64  |
| Unigene18043  | Potri.013G084100.7 | 6.9368   | 38.4087  | -2.4691 | Down | 2.74E-91  | 5.22E-90  |
| Unigene25730  | Potri.001G056100.1 | 18.8266  | 104.272  | -2.4695 | Down | 4.25E-158 | 1.63E-156 |
| Unigene106727 | Potri.019G061200.1 | 1.3599   | 7.5347   | -2.47   | Down | 8.83E-12  | 2.77E-11  |
| Unigene20171  | Potri.016G133700.1 | 2.6643   | 14.7619  | -2.47   | Down | 5.38E-17  | 2.13E-16  |
| Unigene97940  | Potri.015G121900.1 | 2.4749   | 13.7125  | -2.47   | Down | 8.83E-12  | 2.77E-11  |
| Unigene14959  | Potri.012G092700.1 | 0.7253   | 4.0185   | -2.47   | Down | 1.66E-06  | 3.75E-06  |
| Unigene48706  | Potri.010G099300.3 | 0.825    | 4.5708   | -2.47   | Down | 8.83E-12  | 2.77E-11  |
| Unigene5157   | Potri.006G276600.3 | 0.7134   | 3.9526   | -2.47   | Down | 8.83E-12  | 2.77E-11  |
| Unigene46043  | Potri.006G107300.3 | 0.8723   | 4.833    | -2.47   | Down | 5.38E-17  | 2.13E-16  |
| Unigene6913   | Potri.003G223600.1 | 2.0293   | 11.2435  | -2.47   | Down | 5.38E-17  | 2.13E-16  |
| Unigene36183  | Potri.003G132500.1 | 1.5006   | 8.3142   | -2.47   | Down | 8.83E-12  | 2.77E-11  |
| Unigene4681   | Potri.002G088000.4 | 0.8942   | 4.9543   | -2.47   | Down | 1.66E-06  | 3.75E-06  |
| Unigene104127 | Potri.017G015600.3 | 1.0542   | 5.8412   | -2.4701 | Down | 5.38E-17  | 2.13E-16  |
| Unigene60975  | Potri.016G002600.1 | 1.1604   | 6.4296   | -2.4701 | Down | 1.66E-06  | 3.75E-06  |
| Unigene44506  | Potri.014G180100.1 | 1.6473   | 9.1272   | -2.4701 | Down | 3.46E-22  | 1.65E-21  |
| Unigene116497 | Potri.014G142700.1 | 1.6268   | 9.0135   | -2.4701 | Down | 8.83E-12  | 2.77E-11  |
| Unigene35408  | Potri.014G136900.2 | 0.6889   | 3.8171   | -2.4701 | Down | 1.66E-06  | 3.75E-06  |

|               |                    |         |          |         |      |           |           |
|---------------|--------------------|---------|----------|---------|------|-----------|-----------|
| Unigene36762  | Potri.014G104000.4 | 1.3563  | 7.5152   | -2.4701 | Down | 8.83E-12  | 2.77E-11  |
| Unigene97187  | Potri.014G088500.1 | 1.1146  | 6.1757   | -2.4701 | Down | 3.46E-22  | 1.65E-21  |
| Unigene119444 | Potri.010G085900.2 | 1.6525  | 9.1561   | -2.4701 | Down | 2.30E-27  | 1.29E-26  |
| Unigene41761  | Potri.009G120800.1 | 3.4582  | 19.1612  | -2.4701 | Down | 3.46E-22  | 1.65E-21  |
| Unigene82158  | Potri.008G098700.1 | 1.0081  | 5.5856   | -2.4701 | Down | 1.66E-06  | 3.75E-06  |
| Unigene106683 | Potri.007G048800.1 | 0.603   | 3.341    | -2.4701 | Down | 1.66E-06  | 3.75E-06  |
| Unigene116537 | Potri.007G043300.2 | 4.8652  | 26.9565  | -2.4701 | Down | 1.56E-32  | 1.01E-31  |
| Unigene53192  | Potri.006G250600.1 | 1.0571  | 5.857    | -2.4701 | Down | 1.66E-06  | 3.75E-06  |
| Unigene106582 | Potri.005G204500.1 | 0.7173  | 3.9744   | -2.4701 | Down | 1.66E-06  | 3.75E-06  |
| Unigene116343 | Potri.004G219100.3 | 1.6525  | 9.1561   | -2.4701 | Down | 8.83E-12  | 2.77E-11  |
| Unigene103646 | Potri.004G015000.1 | 0.7912  | 4.3838   | -2.4701 | Down | 1.66E-06  | 3.75E-06  |
| Unigene114384 | Potri.003G196900.2 | 0.9706  | 5.3779   | -2.4701 | Down | 1.66E-06  | 3.75E-06  |
| Unigene46635  | Potri.016G121100.1 | 29.9935 | 166.1955 | -2.4702 | Down | 0         | 0         |
| Unigene118616 | Potri.011G156500.1 | 0.5651  | 3.1313   | -2.4702 | Down | 1.66E-06  | 3.75E-06  |
| Unigene90935  | Potri.019G010200.1 | 10.3506 | 57.3644  | -2.4704 | Down | 2.41E-83  | 4.14E-82  |
| Unigene36485  | Potri.002G214800.3 | 10.7159 | 59.3897  | -2.4705 | Down | 3.36E-78  | 5.37E-77  |
| Unigene44955  | Potri.003G001800.1 | 7.4599  | 41.35    | -2.4707 | Down | 1.84E-52  | 1.89E-51  |
| Unigene45244  | Potri.007G057600.2 | 4.6891  | 25.9941  | -2.4708 | Down | 1.21E-82  | 2.05E-81  |
| Unigene21580  | Potri.003G223700.1 | 1.4876  | 8.2481   | -2.4711 | Down | 7.87E-32  | 5.03E-31  |
| Unigene51428  | Potri.019G041600.2 | 4.2315  | 23.4695  | -2.4715 | Down | 1.76E-21  | 8.22E-21  |
| Unigene12626  | Potri.004G181200.1 | 1.7952  | 9.9568   | -2.4715 | Down | 1.76E-21  | 8.22E-21  |
| Unigene42993  | Potri.011G079000.1 | 6.14    | 34.0652  | -2.472  | Down | 5.41E-110 | 1.31E-108 |
| Unigene49713  | Potri.001G172400.3 | 5.9366  | 32.9446  | -2.4723 | Down | 9.51E-41  | 7.59E-40  |
| Unigene21542  | Potri.014G145400.2 | 2.3452  | 13.0181  | -2.4727 | Down | 3.85E-79  | 6.24E-78  |
| Unigene50089  | Potri.010G193000.1 | 3.981   | 22.1005  | -2.4729 | Down | 1.79E-117 | 4.69E-116 |
| Unigene41880  | Potri.016G011100.1 | 4.5106  | 25.0457  | -2.4732 | Down | 4.79E-40  | 3.76E-39  |
| Unigene106118 | Potri.010G062700.9 | 1.5442  | 8.5746   | -2.4732 | Down | 4.57E-11  | 1.38E-10  |
| Unigene119282 | Potri.004G032200.2 | 1.4716  | 8.1712   | -2.4732 | Down | 8.95E-21  | 4.09E-20  |
| Unigene80969  | Potri.003G174800.2 | 36.5595 | 202.9991 | -2.4732 | Down | 8.38E-184 | 3.94E-182 |
| Unigene48904  | Potri.007G096100.2 | 11.1981 | 62.1851  | -2.4733 | Down | 4.71E-102 | 1.03E-100 |
| Unigene2423   | Potri.008G197700.1 | 7.7444  | 43.0118  | -2.4735 | Down | 2.10E-182 | 9.74E-181 |
| Unigene23511  | Potri.008G108300.1 | 1.7527  | 9.7365   | -2.4738 | Down | 2.99E-25  | 1.58E-24  |
| Unigene40190  | Potri.015G057800.1 | 2.0508  | 11.3927  | -2.4739 | Down | 2.99E-25  | 1.58E-24  |
| Unigene29459  | Potri.008G166700.1 | 1.9282  | 10.7117  | -2.4739 | Down | 2.99E-25  | 1.58E-24  |
| Unigene50820  | Potri.015G056400.1 | 6.3352  | 35.2004  | -2.4741 | Down | 1.89E-67  | 2.56E-66  |
| Unigene94613  | Potri.004G236900.1 | 1.0825  | 6.0145   | -2.4741 | Down | 2.10E-53  | 2.20E-52  |
| Unigene51     | Potri.001G189700.1 | 9.242   | 51.3606  | -2.4744 | Down | 0         | 0         |
| Unigene33808  | Potri.001G189700.5 | 14.3743 | 79.8939  | -2.4746 | Down | 9.53E-146 | 3.29E-144 |
| Unigene41297  | Potri.001G124000.2 | 16.9149 | 94.0381  | -2.475  | Down | 5.15E-117 | 1.34E-115 |

|               |                    |         |          |         |      |           |           |
|---------------|--------------------|---------|----------|---------|------|-----------|-----------|
| Unigene22561  | Potri.014G066500.1 | 18.0109 | 100.168  | -2.4755 | Down | 1.79E-220 | 1.04E-218 |
| Unigene27886  | Potri.004G226700.1 | 5.8396  | 32.4769  | -2.4755 | Down | 7.96E-84  | 1.37E-82  |
| Unigene34150  | Potri.001G408200.8 | 1.6688  | 9.281    | -2.4755 | Down | 5.15E-29  | 3.04E-28  |
| Unigene90605  | Potri.007G008100.2 | 21.2454 | 118.1735 | -2.4757 | Down | 3.88E-165 | 1.58E-163 |
| Unigene81409  | Potri.005G071900.4 | 18.9435 | 105.3675 | -2.4757 | Down | 3.75E-97  | 7.73E-96  |
| Unigene24959  | Potri.002G021400.1 | 2.7841  | 15.4906  | -2.4761 | Down | 9.48E-56  | 1.04E-54  |
| Unigene33251  | Potri.013G003000.2 | 6.7457  | 37.5347  | -2.4762 | Down | 1.56E-127 | 4.51E-126 |
| Unigene22428  | Potri.015G095500.2 | 3.0096  | 16.7481  | -2.4764 | Down | 9.42E-96  | 1.90E-94  |
| Unigene38384  | Potri.013G076700.1 | 9.7873  | 54.4659  | -2.4764 | Down | 9.42E-96  | 1.90E-94  |
| Unigene21491  | Potri.014G095300.6 | 9.1265  | 50.7973  | -2.4766 | Down | 5.58E-291 | 4.75E-289 |
| Unigene40674  | Potri.T064300.1    | 1.0104  | 5.6241   | -2.4767 | Down | 2.37E-10  | 6.89E-10  |
| Unigene36067  | Potri.011G024500.2 | 1.9128  | 10.6474  | -2.4767 | Down | 2.37E-10  | 6.89E-10  |
| Unigene114677 | Potri.009G053300.5 | 0.8168  | 4.5465   | -2.4767 | Down | 8.87E-06  | 1.88E-05  |
| Unigene28310  | Potri.008G032800.2 | 1.3688  | 7.6192   | -2.4767 | Down | 2.37E-10  | 6.89E-10  |
| Unigene58891  | Potri.007G031000.1 | 5.4224  | 30.1832  | -2.4767 | Down | 1.34E-50  | 1.33E-49  |
| Unigene3175   | Potri.006G194200.2 | 1.5872  | 8.835    | -2.4767 | Down | 7.21E-15  | 2.61E-14  |
| Unigene115077 | Potri.006G068900.1 | 0.7936  | 4.4175   | -2.4767 | Down | 8.87E-06  | 1.88E-05  |
| Unigene99006  | Potri.005G242900.1 | 0.8575  | 4.773    | -2.4767 | Down | 8.87E-06  | 1.88E-05  |
| Unigene106678 | Potri.003G163100.1 | 0.6487  | 3.6108   | -2.4767 | Down | 2.37E-10  | 6.89E-10  |
| Unigene103427 | Potri.001G452000.1 | 0.7411  | 4.125    | -2.4767 | Down | 8.87E-06  | 1.88E-05  |
| Unigene118962 | Potri.001G339100.1 | 0.8382  | 4.6657   | -2.4767 | Down | 2.37E-10  | 6.89E-10  |
| Unigene14367  | Potri.001G220100.1 | 6.0897  | 33.8977  | -2.4767 | Down | 3.10E-37  | 2.27E-36  |
| Unigene9329   | Potri.018G090700.2 | 0.8916  | 4.9631   | -2.4768 | Down | 8.87E-06  | 1.88E-05  |
| Unigene24595  | Potri.018G050900.6 | 1.8806  | 10.4684  | -2.4768 | Down | 2.37E-10  | 6.89E-10  |
| Unigene29953  | Potri.016G010600.1 | 1.9805  | 11.0243  | -2.4768 | Down | 7.21E-15  | 2.61E-14  |
| Unigene77301  | Potri.007G054500.1 | 0.973   | 5.4163   | -2.4768 | Down | 8.87E-06  | 1.88E-05  |
| Unigene104703 | Potri.006G151600.2 | 0.6199  | 3.4508   | -2.4768 | Down | 8.87E-06  | 1.88E-05  |
| Unigene22933  | Potri.006G139600.2 | 0.5843  | 3.2526   | -2.4768 | Down | 8.87E-06  | 1.88E-05  |
| Unigene6066   | Potri.005G176600.1 | 2.3978  | 13.3472  | -2.4768 | Down | 7.21E-15  | 2.61E-14  |
| Unigene28005  | Potri.004G171300.1 | 1.7215  | 9.5826   | -2.4768 | Down | 2.32E-19  | 1.01E-18  |
| Unigene78748  | Potri.005G071900.4 | 44.0385 | 245.1635 | -2.4769 | Down | 9.58E-210 | 5.26E-208 |
| Unigene63505  | Potri.008G217300.3 | 8.506   | 47.3571  | -2.477  | Down | 5.38E-121 | 1.47E-119 |
| Unigene32900  | Potri.003G067000.1 | 6.6299  | 36.9137  | -2.4771 | Down | 8.56E-99  | 1.81E-97  |
| Unigene16160  | Potri.013G135700.2 | 13.6732 | 76.1461  | -2.4774 | Down | 1.55E-102 | 3.43E-101 |
| Unigene53914  | Potri.005G156500.2 | 4.4898  | 25.0041  | -2.4774 | Down | 6.76E-50  | 6.58E-49  |
| Unigene52231  | Potri.019G091300.1 | 10.2754 | 57.2335  | -2.4777 | Down | 7.03E-76  | 1.08E-74  |
| Unigene25218  | Potri.008G180400.1 | 9.4798  | 52.8015  | -2.4777 | Down | 3.72E-115 | 9.51E-114 |
| Unigene48128  | Potri.014G106300.3 | 3.8328  | 21.3515  | -2.4779 | Down | 4.52E-32  | 2.90E-31  |
| Unigene23387  | Potri.006G098300.2 | 5.6018  | 31.2061  | -2.4779 | Down | 4.57E-184 | 2.15E-182 |

|               |                    |         |          |         |      |           |           |
|---------------|--------------------|---------|----------|---------|------|-----------|-----------|
| Unigene22014  | Potri.008G189200.1 | 2.1986  | 12.2516  | -2.4783 | Down | 9.64E-45  | 8.41E-44  |
| Unigene87179  | Potri.002G093100.2 | 14.5851 | 81.272   | -2.4783 | Down | 2.98E-92  | 5.75E-91  |
| Unigene13049  | Potri.009G052000.1 | 1.8059  | 10.065   | -2.4786 | Down | 2.75E-40  | 2.17E-39  |
| Unigene53120  | Potri.017G073800.1 | 7.5585  | 42.1325  | -2.4788 | Down | 7.89E-36  | 5.59E-35  |
| Unigene1102   | Potri.010G183100.1 | 3.4191  | 19.0641  | -2.4792 | Down | 4.26E-116 | 1.10E-114 |
| Unigene4715   | Potri.017G035500.1 | 33.7472 | 188.1966 | -2.4794 | Down | 0         | 0         |
| Unigene8884   | Potri.019G103000.1 | 1.4712  | 8.2049   | -2.4795 | Down | 3.70E-14  | 1.30E-13  |
| Unigene107147 | Potri.008G016000.2 | 0.9578  | 5.3418   | -2.4795 | Down | 3.70E-14  | 1.30E-13  |
| Unigene22508  | Potri.003G123500.1 | 4.4218  | 24.6604  | -2.4795 | Down | 6.92E-65  | 8.96E-64  |
| Unigene89494  | Potri.004G173900.1 | 10.0301 | 55.9441  | -2.4796 | Down | 4.46E-73  | 6.57E-72  |
| Unigene17728  | Potri.015G085100.1 | 18.0184 | 100.5153 | -2.4799 | Down | 3.06E-277 | 2.42E-275 |
| Unigene34158  | Potri.005G255000.1 | 6.5987  | 36.8113  | -2.4799 | Down | 1.89E-89  | 3.51E-88  |
| Unigene51439  | Potri.016G084700.4 | 4.8803  | 27.2283  | -2.4801 | Down | 1.98E-22  | 9.55E-22  |
| Unigene23552  | Potri.014G087300.4 | 5.9062  | 32.9622  | -2.4805 | Down | 2.62E-84  | 4.56E-83  |
| Unigene16389  | Potri.002G102700.1 | 5.0671  | 28.2813  | -2.4806 | Down | 2.73E-55  | 2.97E-54  |
| Unigene72822  | Potri.004G226700.1 | 32.6371 | 182.1858 | -2.4808 | Down | 3.91E-137 | 1.25E-135 |
| Unigene99344  | Potri.018G138000.1 | 0.6431  | 3.5902   | -2.4809 | Down | 1.23E-09  | 3.44E-09  |
| Unigene5127   | Potri.014G107400.1 | 1.0575  | 5.9035   | -2.4809 | Down | 1.23E-09  | 3.44E-09  |
| Unigene46851  | Potri.003G207200.3 | 1.8908  | 10.5556  | -2.4809 | Down | 1.23E-09  | 3.44E-09  |
| Unigene111004 | Potri.018G019900.1 | 1.7995  | 10.0463  | -2.481  | Down | 1.23E-09  | 3.44E-09  |
| Unigene30608  | Potri.014G038100.1 | 0.7236  | 4.0398   | -2.481  | Down | 1.23E-09  | 3.44E-09  |
| Unigene94742  | Potri.010G134100.1 | 1.3235  | 7.3889   | -2.481  | Down | 1.23E-09  | 3.44E-09  |
| Unigene117825 | Potri.008G134900.2 | 1.0629  | 5.9341   | -2.481  | Down | 1.23E-09  | 3.44E-09  |
| Unigene4597   | Potri.008G025800.6 | 1.4246  | 7.9533   | -2.481  | Down | 1.23E-09  | 3.44E-09  |
| Unigene52979  | Potri.008G005200.1 | 3.2693  | 18.2514  | -2.481  | Down | 6.03E-18  | 2.48E-17  |
| Unigene98058  | Potri.005G061400.1 | 1.1059  | 6.174    | -2.481  | Down | 1.23E-09  | 3.44E-09  |
| Unigene28861  | Potri.003G154600.1 | 3.9014  | 21.7803  | -2.481  | Down | 7.71E-51  | 7.65E-50  |
| Unigene48528  | Potri.003G120300.3 | 11.0806 | 61.8751  | -2.4813 | Down | 1.37E-54  | 1.47E-53  |
| Unigene32095  | Potri.003G018900.1 | 9.2759  | 51.8055  | -2.4815 | Down | 0         | 0         |
| Unigene24011  | Potri.004G083300.4 | 3.73    | 20.832   | -2.4816 | Down | 7.80E-95  | 1.56E-93  |
| Unigene78699  | Potri.018G122700.1 | 21.1573 | 118.1918 | -2.4819 | Down | 2.57E-102 | 5.65E-101 |
| Unigene14682  | Potri.005G174600.2 | 3.0892  | 17.2575  | -2.4819 | Down | 1.01E-21  | 4.75E-21  |
| Unigene18203  | Potri.013G119400.1 | 3.176   | 17.7452  | -2.4821 | Down | 1.01E-33  | 6.80E-33  |
| Unigene53604  | Potri.002G215600.2 | 14.3846 | 80.3704  | -2.4821 | Down | 7.90E-66  | 1.04E-64  |
| Unigene52763  | Potri.016G066000.4 | 10.0611 | 56.224   | -2.4824 | Down | 1.96E-93  | 3.84E-92  |
| Unigene83344  | Potri.013G155100.3 | 57.8212 | 323.1249 | -2.4824 | Down | 0         | 0         |
| Unigene3960   | Potri.008G129400.1 | 1.8251  | 10.1999  | -2.4825 | Down | 1.90E-13  | 6.46E-13  |
| Unigene110719 | Potri.001G291800.1 | 5.2814  | 29.5166  | -2.4825 | Down | 1.71E-25  | 9.10E-25  |
| Unigene31684  | Potri.018G008700.1 | 1.6395  | 9.1631   | -2.4826 | Down | 1.90E-13  | 6.47E-13  |

|               |                     |         |          |         |      |           |           |
|---------------|---------------------|---------|----------|---------|------|-----------|-----------|
| Unigene80470  | Potri.001G347400.2  | 2.4064  | 13.4491  | -2.4826 | Down | 1.90E-13  | 6.46E-13  |
| Unigene89471  | Potri.001G146100.1  | 73.1323 | 408.8506 | -2.483  | Down | 0         | 0         |
| Unigene40234  | Potri.018G087700.3  | 6.4478  | 36.0524  | -2.4832 | Down | 1.11E-60  | 1.34E-59  |
| Unigene30272  | Potri.006G184200.1  | 2.219   | 12.4085  | -2.4833 | Down | 3.08E-17  | 1.23E-16  |
| Unigene30009  | Potri.006G164500.1  | 1.1206  | 6.2664   | -2.4834 | Down | 3.08E-17  | 1.23E-16  |
| Unigene18777  | Potri.001G025300.1  | 10.514  | 58.7945  | -2.4834 | Down | 8.93E-96  | 1.81E-94  |
| Unigene9114   | Potri.012G033500.3  | 7.0858  | 39.6356  | -2.4838 | Down | 4.48E-95  | 8.97E-94  |
| Unigene84821  | Potri.004G065800.9  | 42.7225 | 238.9737 | -2.4838 | Down | 1.01E-242 | 6.68E-241 |
| Unigene81821  | Potri.010G221700.1  | 11.3205 | 63.3269  | -2.4839 | Down | 5.58E-60  | 6.63E-59  |
| Unigene38667  | Potri.006G049300.1  | 1.9671  | 11.0041  | -2.4839 | Down | 5.12E-21  | 2.36E-20  |
| Unigene119141 | Potri.003G136000.1  | 1.6354  | 9.1484   | -2.4839 | Down | 5.12E-21  | 2.36E-20  |
| Unigene25764  | Potri.001G212300.1  | 25.8788 | 144.7715 | -2.4839 | Down | 9.52E-161 | 3.73E-159 |
| Unigene8413   | Potri.T081900.1     | 3.0768  | 17.2139  | -2.4841 | Down | 2.78E-44  | 2.40E-43  |
| Unigene88809  | Potri.017G054400.2  | 6.2348  | 34.8822  | -2.4841 | Down | 2.78E-44  | 2.40E-43  |
| Unigene21563  | Potri.013G073300.1  | 2.5492  | 14.2624  | -2.4841 | Down | 6.84E-87  | 1.23E-85  |
| Unigene80851  | Potri.T093900.4     | 29.1263 | 162.9822 | -2.4843 | Down | 3.91E-148 | 1.38E-146 |
| Unigene42837  | Potri.004G071600.1  | 5.966   | 33.3864  | -2.4844 | Down | 3.70E-286 | 3.09E-284 |
| Unigene15016  | Potri.008G170100.1  | 15.1087 | 84.567   | -2.4847 | Down | 2.04E-97  | 4.22E-96  |
| Unigene64839  | Potri.004G089800.2  | 8.5575  | 47.9016  | -2.4848 | Down | 1.62E-70  | 2.30E-69  |
| Unigene32138  | Potri.010G115000.6  | 18.0768 | 101.2038 | -2.4851 | Down | 0         | 0         |
| Unigene30481  | Potri.008G124100.1  | 15.8579 | 88.7925  | -2.4852 | Down | 6.11E-108 | 1.44E-106 |
| Unigene87114  | Potri.008G021400.2  | 13.9124 | 77.9154  | -2.4855 | Down | 1.56E-88  | 2.87E-87  |
| Unigene1911   | Potri.005G106100.1  | 8.4383  | 47.256   | -2.4855 | Down | 1.50E-156 | 5.68E-155 |
| Unigene29607  | Potri.013G141300.1  | 9.7574  | 54.6489  | -2.4856 | Down | 3.06E-107 | 7.13E-106 |
| Unigene48456  | Potri.017G088200.2  | 0.6857  | 3.8412   | -2.4859 | Down | 6.42E-09  | 1.72E-08  |
| Unigene45965  | Potri.014G116900.1  | 0.6301  | 3.5298   | -2.4859 | Down | 4.80E-05  | 9.52E-05  |
| Unigene106395 | Potri.005G020600.6  | 0.954   | 5.3443   | -2.4859 | Down | 6.42E-09  | 1.72E-08  |
| Unigene9053   | Potri.017G133200.4  | 3.4751  | 19.4686  | -2.486  | Down | 7.08E-58  | 8.09E-57  |
| Unigene46722  | Potri.016G111400.1  | 0.8439  | 4.7277   | -2.486  | Down | 4.80E-05  | 9.52E-05  |
| Unigene85696  | Potri.016G088000.2  | 1.9161  | 10.7344  | -2.486  | Down | 9.77E-13  | 3.21E-12  |
| Unigene25742  | Potri.011G141400.1  | 0.6544  | 3.666    | -2.486  | Down | 4.80E-05  | 9.52E-05  |
| Unigene101121 | Potri.005G182800.1  | 0.7654  | 4.2879   | -2.486  | Down | 9.77E-13  | 3.21E-12  |
| Unigene7952   | Potri.005G147900.1  | 1.7369  | 9.7305   | -2.486  | Down | 1.31E-31  | 8.30E-31  |
| Unigene48765  | Potri.004G157200.3  | 1.4854  | 8.3215   | -2.486  | Down | 2.28E-35  | 1.60E-34  |
| Unigene109124 | Potri.004G015500.1  | 0.8797  | 4.9284   | -2.486  | Down | 4.80E-05  | 9.52E-05  |
| Unigene102512 | Potri.002G194100.1  | 0.5406  | 3.0285   | -2.486  | Down | 4.80E-05  | 9.52E-05  |
| Unigene115578 | Potri.002G124800.1  | 0.6365  | 3.5659   | -2.486  | Down | 4.80E-05  | 9.52E-05  |
| Unigene115930 | Potri.001G412900.11 | 1.231   | 6.8965   | -2.486  | Down | 6.42E-09  | 1.72E-08  |
| Unigene105040 | Potri.001G091800.1  | 0.9613  | 5.3856   | -2.486  | Down | 1.57E-16  | 6.12E-16  |

|               |                    |         |          |         |      |           |           |
|---------------|--------------------|---------|----------|---------|------|-----------|-----------|
| Unigene108976 | Potri.001G084600.2 | 0.8839  | 4.9517   | -2.486  | Down | 4.80E-05  | 9.52E-05  |
| Unigene114762 | Potri.018G040500.1 | 2.0271  | 11.3567  | -2.4861 | Down | 9.77E-13  | 3.21E-12  |
| Unigene102871 | Potri.017G081500.2 | 0.6258  | 3.5061   | -2.4861 | Down | 4.80E-05  | 9.52E-05  |
| Unigene17341  | Potri.016G055700.1 | 1.4318  | 8.0216   | -2.4861 | Down | 1.57E-16  | 6.12E-16  |
| Unigene115900 | Potri.016G040500.1 | 0.6175  | 3.4597   | -2.4861 | Down | 4.80E-05  | 9.52E-05  |
| Unigene47806  | Potri.013G153100.1 | 0.6258  | 3.5061   | -2.4861 | Down | 4.80E-05  | 9.52E-05  |
| Unigene115774 | Potri.003G162100.1 | 0.6258  | 3.5061   | -2.4861 | Down | 4.80E-05  | 9.52E-05  |
| Unigene13358  | Potri.014G135500.3 | 3.5042  | 19.6388  | -2.4865 | Down | 1.20E-79  | 1.96E-78  |
| Unigene850    | Potri.017G081300.1 | 5.3362  | 29.9066  | -2.4866 | Down | 6.66E-76  | 1.03E-74  |
| Unigene52685  | Potri.005G125700.2 | 6.8999  | 38.6769  | -2.4868 | Down | 1.99E-53  | 2.09E-52  |
| Unigene25495  | Potri.005G137700.1 | 16.4423 | 92.1799  | -2.487  | Down | 1.09E-82  | 1.85E-81  |
| Unigene39029  | Potri.011G057300.2 | 9.0184  | 50.5617  | -2.4871 | Down | 6.03E-79  | 9.73E-78  |
| Unigene40875  | Potri.002G024200.1 | 2.6643  | 14.9428  | -2.4876 | Down | 1.00E-52  | 1.04E-51  |
| Unigene970    | Potri.016G035900.1 | 9.0608  | 50.8225  | -2.4878 | Down | 6.01E-169 | 2.52E-167 |
| Unigene23143  | Potri.019G109400.1 | 11.0702 | 62.1044  | -2.488  | Down | 4.95E-85  | 8.70E-84  |
| Unigene37211  | Potri.009G104300.1 | 12.4872 | 70.062   | -2.4882 | Down | 1.61E-59  | 1.89E-58  |
| Unigene10035  | Potri.016G010600.1 | 1.2974  | 7.2799   | -2.4883 | Down | 1.33E-19  | 5.82E-19  |
| Unigene10914  | Potri.005G051600.1 | 3.8132  | 21.396   | -2.4883 | Down | 1.48E-149 | 5.28E-148 |
| Unigene24012  | Potri.009G137200.2 | 6.9333  | 38.9087  | -2.4885 | Down | 2.41E-120 | 6.53E-119 |
| Unigene10794  | Potri.018G033700.1 | 2.6643  | 14.9537  | -2.4887 | Down | 7.38E-95  | 1.47E-93  |
| Unigene14023  | Potri.008G077400.5 | 2.0542  | 11.5314  | -2.4889 | Down | 8.04E-16  | 3.03E-15  |
| Unigene107172 | Potri.006G191800.2 | 1.0437  | 5.8591   | -2.489  | Down | 8.04E-16  | 3.03E-15  |
| Unigene30683  | Potri.004G138200.1 | 24.7854 | 139.1429 | -2.489  | Down | 6.17E-155 | 2.31E-153 |
| Unigene1104   | Potri.017G151200.1 | 6.178   | 34.6941  | -2.4895 | Down | 7.27E-62  | 8.92E-61  |
| Unigene44375  | Potri.006G144500.1 | 12.4726 | 70.0534  | -2.4897 | Down | 2.58E-160 | 1.01E-158 |
| Unigene118784 | Potri.016G001300.1 | 1.0635  | 5.9746   | -2.49   | Down | 5.04E-12  | 1.60E-11  |
| Unigene94655  | Potri.015G078500.2 | 2.9755  | 16.7152  | -2.49   | Down | 1.13E-22  | 5.51E-22  |
| Unigene81085  | Potri.008G092800.1 | 2.0722  | 11.641   | -2.49   | Down | 5.04E-12  | 1.60E-11  |
| Unigene118736 | Potri.003G064000.4 | 1.0879  | 6.1115   | -2.49   | Down | 5.04E-12  | 1.60E-11  |
| Unigene33378  | Potri.003G038500.2 | 1.9893  | 11.1753  | -2.49   | Down | 1.13E-22  | 5.51E-22  |
| Unigene14089  | Potri.001G407000.1 | 2.2364  | 12.5633  | -2.49   | Down | 1.13E-22  | 5.51E-22  |
| Unigene25336  | Potri.007G130900.1 | 9.6979  | 54.4911  | -2.4903 | Down | 1.27E-50  | 1.26E-49  |
| Unigene22131  | Potri.015G134600.1 | 8.3685  | 47.0258  | -2.4904 | Down | 1.40E-238 | 9.08E-237 |
| Unigene75812  | Potri.T155100.2    | 13.8828 | 78.0278  | -2.4907 | Down | 3.29E-64  | 4.21E-63  |
| Unigene52542  | Potri.001G001400.2 | 2.139   | 12.0268  | -2.4912 | Down | 9.81E-26  | 5.25E-25  |
| Unigene44410  | Potri.005G145400.8 | 7.7385  | 43.5201  | -2.4916 | Down | 9.56E-115 | 2.43E-113 |
| Unigene24411  | Potri.005G123000.1 | 8.1106  | 45.6156  | -2.4916 | Down | 4.38E-135 | 1.37E-133 |
| Unigene10357  | Potri.004G001900.2 | 4.1717  | 23.4634  | -2.4917 | Down | 5.74E-53  | 5.95E-52  |
| Unigene38352  | Potri.018G065600.3 | 18.1743 | 102.2275 | -2.4918 | Down | 2.40E-131 | 7.24E-130 |



|               |                     |         |          |         |      |           |           |
|---------------|---------------------|---------|----------|---------|------|-----------|-----------|
| Unigene106746 | Potri.T118800.1     | 0.7862  | 4.4232   | -2.4921 | Down | 3.37E-08  | 8.63E-08  |
| Unigene28479  | Potri.018G025600.2  | 2.9107  | 16.3761  | -2.4922 | Down | 5.76E-22  | 2.74E-21  |
| Unigene9591   | Potri.016G015700.1  | 2.0386  | 11.4699  | -2.4922 | Down | 5.76E-22  | 2.74E-21  |
| Unigene55917  | Potri.010G171500.1  | 4.7549  | 26.7522  | -2.4922 | Down | 1.31E-35  | 9.20E-35  |
| Unigene115027 | Potri.006G058300.1  | 1.1946  | 6.7214   | -2.4922 | Down | 3.37E-08  | 8.63E-08  |
| Unigene38187  | Potri.004G099100.1  | 3.7135  | 20.8928  | -2.4922 | Down | 1.31E-35  | 9.20E-35  |
| Unigene33296  | Potri.002G172800.1  | 10.6163 | 59.73    | -2.4922 | Down | 2.05E-198 | 1.06E-196 |
| Unigene26945  | Potri.002G123100.1  | 2.9577  | 16.6406  | -2.4922 | Down | 4.12E-15  | 1.51E-14  |
| Unigene117010 | Potri.001G315900.2  | 0.9844  | 5.5387   | -2.4922 | Down | 3.37E-08  | 8.63E-08  |
| Unigene37237  | Potri.001G100200.1  | 1.0361  | 5.8293   | -2.4922 | Down | 3.37E-08  | 8.63E-08  |
| Unigene37822  | Potri.016G038100.10 | 5.0056  | 28.1818  | -2.4931 | Down | 4.97E-25  | 2.60E-24  |
| Unigene10994  | Potri.009G159300.1  | 13.7734 | 77.5492  | -2.4932 | Down | 0         | 0         |
| Unigene9952   | Potri.009G076200.3  | 22.2901 | 125.5033 | -2.4933 | Down | 6.37E-152 | 2.33E-150 |
| Unigene44965  | Potri.005G151200.1  | 1.2457  | 7.0141   | -2.4933 | Down | 1.03E-41  | 8.38E-41  |
| Unigene33101  | Potri.013G080700.1  | 2.4904  | 14.0252  | -2.4936 | Down | 6.59E-35  | 4.55E-34  |
| Unigene107171 | Potri.012G095500.1  | 0.6142  | 3.4591   | -2.4936 | Down | 3.44E-18  | 1.43E-17  |
| Unigene104232 | Potri.006G213400.5  | 1.5996  | 9.0084   | -2.4936 | Down | 3.44E-18  | 1.43E-17  |
| Unigene10251  | Potri.006G109600.3  | 2.0722  | 11.6699  | -2.4936 | Down | 3.44E-18  | 1.43E-17  |
| Unigene11719  | Potri.003G093600.1  | 3.361   | 18.9315  | -2.4938 | Down | 3.06E-71  | 4.38E-70  |
| Unigene41165  | Potri.001G073900.4  | 3.4086  | 19.2008  | -2.4939 | Down | 4.32E-28  | 2.48E-27  |
| Unigene22419  | Potri.011G037100.1  | 3.7125  | 20.9161  | -2.4942 | Down | 3.45E-130 | 1.03E-128 |
| Unigene30862  | Potri.016G101000.1  | 1.1045  | 6.2246   | -2.4946 | Down | 2.60E-11  | 7.99E-11  |
| Unigene30236  | Potri.012G095400.1  | 9.5417  | 53.7879  | -2.495  | Down | 1.25E-76  | 1.96E-75  |
| Unigene27704  | Potri.007G040300.1  | 55.1458 | 310.9114 | -2.4952 | Down | 0         | 0         |
| Unigene46503  | Potri.002G239900.1  | 26.0853 | 147.0831 | -2.4953 | Down | 1.28E-163 | 5.15E-162 |
| Unigene51444  | Potri.013G104700.1  | 3.0195  | 17.0309  | -2.4958 | Down | 2.11E-14  | 7.50E-14  |
| Unigene42247  | Potri.006G040600.2  | 2.0521  | 11.5744  | -2.4958 | Down | 2.11E-14  | 7.50E-14  |
| Unigene9355   | Potri.008G107100.1  | 18.3971 | 103.7846 | -2.496  | Down | 1.50E-139 | 4.90E-138 |
| Unigene16195  | Potri.014G129900.2  | 7.148   | 40.3252  | -2.4961 | Down | 2.32E-43  | 1.96E-42  |
| Unigene84544  | Potri.004G106800.1  | 39.9734 | 225.5557 | -2.4964 | Down | 4.04E-228 | 2.46E-226 |
| Unigene39156  | Potri.019G131200.2  | 1.185   | 6.6874   | -2.4966 | Down | 1.76E-17  | 7.11E-17  |
| Unigene5925   | Potri.014G152000.3  | 4.1887  | 23.6384  | -2.4966 | Down | 1.68E-33  | 1.12E-32  |
| Unigene32580  | Potri.002G143200.1  | 5.2469  | 29.6102  | -2.4966 | Down | 3.94E-113 | 9.84E-112 |
| Unigene42163  | Potri.T017700.1     | 16.4601 | 92.8978  | -2.4967 | Down | 2.34E-84  | 4.08E-83  |
| Unigene39044  | Potri.014G020900.1  | 1.7528  | 9.8952   | -2.4971 | Down | 1.49E-20  | 6.75E-20  |
| Unigene49629  | Potri.005G122000.1  | 1.4685  | 8.2902   | -2.4971 | Down | 1.49E-20  | 6.75E-20  |
| Unigene44279  | Potri.005G018700.1  | 19.5908 | 110.6015 | -2.4971 | Down | 2.57E-175 | 1.12E-173 |
| Unigene51186  | Potri.003G129000.3  | 4.229   | 23.8742  | -2.4971 | Down | 1.31E-39  | 1.02E-38  |
| Unigene16244  | Potri.008G005500.1  | 8.2999  | 46.8648  | -2.4973 | Down | 1.08E-64  | 1.39E-63  |

|               |                    |         |          |         |      |           |           |
|---------------|--------------------|---------|----------|---------|------|-----------|-----------|
| Unigene24322  | Potri.006G086600.2 | 3.1939  | 18.0349  | -2.4974 | Down | 1.20E-152 | 4.41E-151 |
| Unigene105865 | Potri.015G042500.1 | 1.494   | 8.4367   | -2.4975 | Down | 1.28E-23  | 6.40E-23  |
| Unigene45502  | Potri.012G072400.2 | 1.4617  | 8.2543   | -2.4975 | Down | 1.28E-23  | 6.40E-23  |
| Unigene34956  | Potri.010G251300.1 | 2.0922  | 11.8146  | -2.4975 | Down | 9.73E-68  | 1.32E-66  |
| Unigene78820  | Potri.012G071600.4 | 24.5022 | 138.3783 | -2.4976 | Down | 7.48E-121 | 2.04E-119 |
| Unigene90749  | Potri.009G044200.1 | 31.7807 | 179.5008 | -2.4978 | Down | 5.33E-255 | 3.78E-253 |
| Unigene17571  | Potri.016G088000.2 | 5.7158  | 32.2903  | -2.4981 | Down | 6.02E-61  | 7.27E-60  |
| Unigene87380  | Potri.003G133000.1 | 10.1834 | 57.535   | -2.4982 | Down | 4.88E-67  | 6.56E-66  |
| Unigene76565  | Potri.004G114300.2 | 68.5194 | 387.1588 | -2.4983 | Down | 0         | 0         |
| Unigene12812  | Potri.002G187500.2 | 2.0494  | 11.5796  | -2.4983 | Down | 7.48E-36  | 5.30E-35  |
| Unigene865    | Potri.010G158300.1 | 4.9608  | 28.0338  | -2.4985 | Down | 2.95E-82  | 4.99E-81  |
| Unigene18559  | Potri.002G213100.1 | 4.2331  | 23.9218  | -2.4985 | Down | 5.87E-42  | 4.82E-41  |
| Unigene2920   | Potri.007G016900.2 | 5.608   | 31.7079  | -2.4993 | Down | 8.27E-100 | 1.77E-98  |
| Unigene31831  | Potri.001G118300.1 | 16.3309 | 92.3472  | -2.4995 | Down | 0         | 0         |
| Unigene48161  | Potri.011G010600.1 | 0.6243  | 3.5309   | -2.4997 | Down | 2.64E-04  | 4.84E-04  |
| Unigene110264 | Potri.003G059700.1 | 0.6721  | 3.8013   | -2.4997 | Down | 2.64E-04  | 4.84E-04  |
| Unigene114922 | Potri.001G465600.1 | 0.5348  | 3.0247   | -2.4997 | Down | 2.64E-04  | 4.84E-04  |
| Unigene102517 | Potri.017G144800.2 | 0.9777  | 5.5301   | -2.4998 | Down | 8.98E-17  | 3.53E-16  |
| Unigene109585 | Potri.017G142700.3 | 1.3815  | 7.8138   | -2.4998 | Down | 1.77E-07  | 4.31E-07  |
| Unigene37998  | Potri.017G115400.2 | 2.8284  | 15.9979  | -2.4998 | Down | 1.08E-13  | 3.73E-13  |
| Unigene57166  | Potri.016G056600.5 | 0.7173  | 4.0572   | -2.4998 | Down | 2.64E-04  | 4.84E-04  |
| Unigene116438 | Potri.014G054400.1 | 0.9354  | 5.2908   | -2.4998 | Down | 1.77E-07  | 4.31E-07  |
| Unigene30037  | Potri.012G022700.2 | 1.5607  | 8.8273   | -2.4998 | Down | 8.98E-17  | 3.53E-16  |
| Unigene51357  | Potri.010G219700.1 | 0.6191  | 3.5016   | -2.4998 | Down | 2.64E-04  | 4.84E-04  |
| Unigene94592  | Potri.010G193500.1 | 0.8725  | 4.935    | -2.4998 | Down | 1.35E-10  | 3.98E-10  |
| Unigene19238  | Potri.010G067500.2 | 1.8307  | 10.3545  | -2.4998 | Down | 1.08E-13  | 3.73E-13  |
| Unigene75075  | Potri.009G122600.2 | 0.6813  | 3.8534   | -2.4998 | Down | 2.64E-04  | 4.84E-04  |
| Unigene67406  | Potri.008G187300.1 | 1.0219  | 5.7801   | -2.4998 | Down | 1.77E-07  | 4.31E-07  |
| Unigene94902  | Potri.008G135600.7 | 0.735   | 4.1571   | -2.4998 | Down | 2.64E-04  | 4.84E-04  |
| Unigene39971  | Potri.007G023900.1 | 2.9041  | 16.4261  | -2.4998 | Down | 5.61E-26  | 3.02E-25  |
| Unigene102026 | Potri.006G154200.1 | 0.6661  | 3.7674   | -2.4998 | Down | 1.77E-07  | 4.31E-07  |
| Unigene36491  | Potri.005G239500.1 | 0.6016  | 3.4028   | -2.4998 | Down | 2.64E-04  | 4.84E-04  |
| Unigene115419 | Potri.004G225700.5 | 1.5488  | 8.7601   | -2.4998 | Down | 1.35E-10  | 3.98E-10  |
| Unigene110206 | Potri.001G168100.1 | 0.6751  | 3.8185   | -2.4998 | Down | 2.64E-04  | 4.84E-04  |
| Unigene95277  | Potri.001G143900.2 | 0.6844  | 3.8711   | -2.4998 | Down | 2.64E-04  | 4.84E-04  |
| Unigene108546 | Potri.001G123600.1 | 0.7173  | 4.0572   | -2.4998 | Down | 2.64E-04  | 4.84E-04  |
| Unigene2643   | Potri.001G079000.1 | 1.1375  | 6.4337   | -2.4998 | Down | 7.58E-20  | 3.36E-19  |
| Unigene110658 | Potri.001G003500.2 | 0.6631  | 3.7506   | -2.4998 | Down | 2.64E-04  | 4.84E-04  |
| Unigene104043 | Potri.019G063500.3 | 0.6515  | 3.6851   | -2.4999 | Down | 2.64E-04  | 4.84E-04  |

|               |                    |         |          |         |      |           |           |
|---------------|--------------------|---------|----------|---------|------|-----------|-----------|
| Unigene118204 | Potri.011G063800.1 | 0.719   | 4.0669   | -2.4999 | Down | 1.77E-07  | 4.31E-07  |
| Unigene20424  | Potri.010G250800.2 | 2.2268  | 12.5954  | -2.4999 | Down | 4.89E-29  | 2.89E-28  |
| Unigene100614 | Potri.010G112200.9 | 1.5541  | 8.7905   | -2.4999 | Down | 1.35E-10  | 3.98E-10  |
| Unigene103785 | Potri.005G143400.2 | 0.822   | 4.6495   | -2.4999 | Down | 1.77E-07  | 4.31E-07  |
| Unigene100795 | Potri.005G142300.1 | 0.6515  | 3.6851   | -2.4999 | Down | 2.64E-04  | 4.84E-04  |
| Unigene114727 | Potri.005G098200.3 | 0.5425  | 3.0687   | -2.4999 | Down | 2.64E-04  | 4.84E-04  |
| Unigene97617  | Potri.003G056900.1 | 0.8304  | 4.697    | -2.4999 | Down | 1.35E-10  | 3.98E-10  |
| Unigene114697 | Potri.002G251000.1 | 0.5445  | 3.0799   | -2.4999 | Down | 2.64E-04  | 4.84E-04  |
| Unigene109654 | Potri.002G040800.2 | 0.6907  | 3.9069   | -2.4999 | Down | 2.64E-04  | 4.84E-04  |
| Unigene113880 | Potri.002G031300.1 | 0.5716  | 3.2333   | -2.4999 | Down | 2.64E-04  | 4.84E-04  |
| Unigene97132  | Potri.001G412000.1 | 0.8691  | 4.9159   | -2.4999 | Down | 1.35E-10  | 3.98E-10  |
| Unigene101995 | Potri.001G139600.2 | 0.5944  | 3.3621   | -2.4999 | Down | 2.64E-04  | 4.84E-04  |
| Unigene46524  | Potri.002G155900.1 | 0.5505  | 3.114    | -2.5    | Down | 2.64E-04  | 4.84E-04  |
| Unigene11933  | Potri.005G090300.1 | 16.5526 | 93.6444  | -2.5001 | Down | 0         | 0         |
| Unigene33118  | Potri.018G059100.1 | 2.339   | 13.2383  | -2.5008 | Down | 7.62E-59  | 8.88E-58  |
| Unigene42701  | Potri.012G047200.2 | 1.7762  | 10.0557  | -2.5011 | Down | 1.49E-40  | 1.18E-39  |
| Unigene16147  | Potri.010G028700.1 | 5.0281  | 28.4645  | -2.5011 | Down | 1.33E-43  | 1.13E-42  |
| Unigene67863  | Potri.018G081700.6 | 4.7916  | 27.1275  | -2.5012 | Down | 1.49E-40  | 1.18E-39  |
| Unigene75970  | Potri.010G066900.1 | 64.8979 | 367.4333 | -2.5012 | Down | 4.33E-297 | 3.78E-295 |
| Unigene2593   | Potri.008G202400.1 | 2.55    | 14.4365  | -2.5012 | Down | 1.49E-40  | 1.18E-39  |
| Unigene3004   | Potri.008G077400.5 | 5.7265  | 32.4316  | -2.5017 | Down | 3.83E-58  | 4.40E-57  |
| Unigene53934  | Potri.005G222500.1 | 4.8788  | 27.6379  | -2.502  | Down | 2.84E-25  | 1.50E-24  |
| Unigene75158  | Potri.002G040700.1 | 62.6769 | 355.0611 | -2.5021 | Down | 3.80E-282 | 3.08E-280 |
| Unigene10822  | Potri.003G001800.1 | 11.14   | 63.1141  | -2.5022 | Down | 4.00E-308 | 3.66E-306 |
| Unigene81103  | Potri.001G161700.2 | 37.1515 | 210.4939 | -2.5023 | Down | 4.07E-193 | 2.03E-191 |
| Unigene37409  | Potri.016G021500.1 | 4.6841  | 26.5409  | -2.5024 | Down | 3.29E-22  | 1.57E-21  |
| Unigene44525  | Potri.008G151100.2 | 3.693   | 20.9281  | -2.5026 | Down | 7.51E-40  | 5.87E-39  |
| Unigene27797  | Potri.014G038400.1 | 1.3028  | 7.3841   | -2.5028 | Down | 8.48E-37  | 6.16E-36  |
| Unigene36620  | Potri.012G039200.1 | 35.7454 | 202.6004 | -2.5028 | Down | 2.76E-212 | 1.53E-210 |
| Unigene54682  | Potri.018G143400.1 | 7.8525  | 44.5114  | -2.503  | Down | 6.35E-69  | 8.78E-68  |
| Unigene10964  | Potri.018G024200.1 | 6.4174  | 36.3815  | -2.5031 | Down | 1.58E-237 | 1.01E-235 |
| Unigene26080  | Potri.004G138200.1 | 23.2136 | 131.6035 | -2.5032 | Down | 5.40E-159 | 2.09E-157 |
| Unigene61873  | Potri.018G114300.2 | 1.947   | 11.0399  | -2.5034 | Down | 4.59E-16  | 1.75E-15  |
| Unigene101844 | Potri.014G107000.1 | 0.9412  | 5.3367   | -2.5034 | Down | 4.59E-16  | 1.75E-15  |
| Unigene24542  | Potri.013G036300.1 | 6.5668  | 37.234   | -2.5034 | Down | 2.22E-135 | 6.97E-134 |
| Unigene46744  | Potri.006G193500.1 | 0.8728  | 4.9489   | -2.5034 | Down | 4.59E-16  | 1.75E-15  |
| Unigene104631 | Potri.009G041200.1 | 0.6717  | 3.809    | -2.5035 | Down | 4.59E-16  | 1.75E-15  |
| Unigene15159  | Potri.001G311600.1 | 8.4986  | 48.1968  | -2.5036 | Down | 9.66E-57  | 1.08E-55  |
| Unigene31927  | Potri.007G065800.2 | 9.8641  | 55.9564  | -2.504  | Down | 0         | 0         |

|               |                    |         |          |         |      |           |           |
|---------------|--------------------|---------|----------|---------|------|-----------|-----------|
| Unigene1010   | Potri.002G166600.2 | 2.1083  | 11.9613  | -2.5042 | Down | 1.31E-73  | 1.94E-72  |
| Unigene103007 | Potri.019G075700.1 | 0.9816  | 5.5695   | -2.5043 | Down | 5.57E-13  | 1.86E-12  |
| Unigene61695  | Potri.017G138600.1 | 8.2684  | 46.9157  | -2.5044 | Down | 4.28E-36  | 3.05E-35  |
| Unigene103333 | Potri.010G045100.1 | 1.4762  | 8.3763   | -2.5044 | Down | 5.57E-13  | 1.86E-12  |
| Unigene112371 | Potri.006G218900.9 | 2.312   | 13.1183  | -2.5044 | Down | 5.57E-13  | 1.86E-12  |
| Unigene12587  | Potri.001G204200.1 | 3.9401  | 22.3566  | -2.5044 | Down | 1.34E-47  | 1.25E-46  |
| Unigene38358  | Potri.010G120800.1 | 3.0283  | 17.1881  | -2.5048 | Down | 4.85E-33  | 3.20E-32  |
| Unigene33690  | Potri.005G164300.1 | 1.4134  | 8.0222   | -2.5048 | Down | 4.85E-33  | 3.20E-32  |
| Unigene22993  | Potri.001G391400.4 | 7.6295  | 43.3056  | -2.5049 | Down | 2.20E-84  | 3.84E-83  |
| Unigene82368  | Potri.T017700.1    | 30.154  | 171.2105 | -2.5053 | Down | 3.24E-163 | 1.30E-161 |
| Unigene68328  | Potri.010G201100.1 | 7.7045  | 43.7426  | -2.5053 | Down | 6.04E-50  | 5.89E-49  |
| Unigene85024  | Potri.002G137200.1 | 8.2742  | 46.9771  | -2.5053 | Down | 6.04E-50  | 5.89E-49  |
| Unigene22540  | Potri.004G001900.2 | 7.2998  | 41.4537  | -2.5056 | Down | 2.02E-120 | 5.46E-119 |
| Unigene7775   | Potri.003G103800.1 | 4.6708  | 26.5265  | -2.5057 | Down | 1.62E-162 | 6.45E-161 |
| Unigene94328  | Potri.005G035200.1 | 3.3985  | 19.3016  | -2.5058 | Down | 8.91E-64  | 1.13E-62  |
| Unigene48831  | Potri.003G128500.4 | 24.8064 | 140.8903 | -2.5058 | Down | 5.18E-213 | 2.88E-211 |
| Unigene7438   | Potri.009G020400.1 | 2.7694  | 15.7304  | -2.5059 | Down | 9.20E-123 | 2.55E-121 |
| Unigene69397  | Potri.013G094700.1 | 1.995   | 11.3326  | -2.506  | Down | 6.33E-27  | 3.51E-26  |
| Unigene49671  | Potri.011G056800.2 | 1.0106  | 5.7407   | -2.506  | Down | 7.01E-10  | 1.99E-09  |
| Unigene21030  | Potri.004G073700.1 | 1.3067  | 7.4227   | -2.506  | Down | 7.01E-10  | 1.99E-09  |
| Unigene118731 | Potri.001G028000.1 | 0.8566  | 4.8658   | -2.506  | Down | 7.01E-10  | 1.99E-09  |
| Unigene104792 | Potri.019G118500.4 | 1.4003  | 7.9548   | -2.5061 | Down | 7.01E-10  | 1.99E-09  |
| Unigene118475 | Potri.017G102300.1 | 0.922   | 5.2376   | -2.5061 | Down | 7.01E-10  | 1.99E-09  |
| Unigene119458 | Potri.005G245400.1 | 1.0093  | 5.7337   | -2.5061 | Down | 1.97E-18  | 8.26E-18  |
| Unigene51848  | Potri.001G084100.1 | 1.6153  | 9.1761   | -2.5061 | Down | 7.01E-10  | 1.99E-09  |
| Unigene47381  | Potri.017G101100.2 | 15.2589 | 86.6933  | -2.5063 | Down | 2.07E-91  | 3.95E-90  |
| Unigene87214  | Potri.007G093200.6 | 18.7693 | 106.6454 | -2.5064 | Down | 4.61E-122 | 1.27E-120 |
| Unigene50432  | Potri.012G034300.1 | 15.9855 | 90.8334  | -2.5065 | Down | 2.78E-144 | 9.42E-143 |
| Unigene27443  | Potri.002G100700.1 | 3.4968  | 19.871   | -2.5066 | Down | 8.52E-41  | 6.81E-40  |
| Unigene74907  | Potri.002G040700.1 | 37.2995 | 211.9862 | -2.5067 | Down | 7.75E-169 | 3.25E-167 |
| Unigene45637  | Potri.002G192300.1 | 6.3023  | 35.8203  | -2.5068 | Down | 6.75E-77  | 1.06E-75  |
| Unigene82274  | Potri.001G323100.3 | 22.3797 | 127.2016 | -2.5069 | Down | 2.31E-121 | 6.31E-120 |
| Unigene33764  | Potri.014G150100.2 | 7.0787  | 40.2439  | -2.5072 | Down | 1.77E-101 | 3.87E-100 |
| Unigene78387  | Potri.006G113600.2 | 30.1873 | 171.6385 | -2.5074 | Down | 2.90E-148 | 1.03E-146 |
| Unigene4769   | Potri.006G026300.2 | 2.7072  | 15.3935  | -2.5074 | Down | 2.35E-15  | 8.69E-15  |
| Unigene16943  | Potri.005G045100.1 | 3.5389  | 20.1307  | -2.508  | Down | 4.29E-40  | 3.38E-39  |
| Unigene4151   | Potri.003G023200.1 | 6.0355  | 34.333   | -2.5081 | Down | 4.29E-40  | 3.38E-39  |
| Unigene2457   | Potri.002G221600.2 | 5.865   | 33.3664  | -2.5082 | Down | 1.68E-108 | 3.97E-107 |
| Unigene50604  | Potri.009G131800.1 | 2.5234  | 14.3579  | -2.5084 | Down | 3.20E-26  | 1.74E-25  |

|               |                    |          |           |         |      |           |           |
|---------------|--------------------|----------|-----------|---------|------|-----------|-----------|
| Unigene114108 | Potri.005G211400.2 | 9.0423   | 51.4492   | -2.5084 | Down | 6.87E-51  | 6.83E-50  |
| Unigene16100  | Potri.010G231300.1 | 5.1953   | 29.5648   | -2.5086 | Down | 1.24E-31  | 7.86E-31  |
| Unigene23924  | Potri.003G008400.2 | 3.1196   | 17.7546   | -2.5088 | Down | 4.85E-37  | 3.54E-36  |
| Unigene117351 | Potri.013G148500.1 | 0.7314   | 4.1649    | -2.5095 | Down | 9.39E-07  | 2.17E-06  |
| Unigene41860  | Potri.012G033500.3 | 0.7376   | 4.2001    | -2.5095 | Down | 2.87E-12  | 9.23E-12  |
| Unigene115250 | Potri.T002400.1    | 0.9161   | 5.217     | -2.5096 | Down | 9.39E-07  | 2.17E-06  |
| Unigene37396  | Potri.019G112000.1 | 0.9599   | 5.4664    | -2.5096 | Down | 9.39E-07  | 2.17E-06  |
| Unigene117316 | Potri.016G087900.1 | 0.7355   | 4.1883    | -2.5096 | Down | 9.39E-07  | 2.17E-06  |
| Unigene118333 | Potri.015G091100.1 | 1.2172   | 6.9317    | -2.5096 | Down | 2.87E-12  | 9.23E-12  |
| Unigene5148   | Potri.008G142500.1 | 1.1868   | 6.7584    | -2.5096 | Down | 9.39E-07  | 2.17E-06  |
| Unigene21974  | Potri.008G070800.1 | 2.424    | 13.8037   | -2.5096 | Down | 2.16E-39  | 1.67E-38  |
| Unigene17607  | Potri.008G049000.1 | 1.0585   | 6.0278    | -2.5096 | Down | 1.00E-17  | 4.10E-17  |
| Unigene118042 | Potri.004G141700.4 | 0.6495   | 3.6986    | -2.5096 | Down | 9.39E-07  | 2.17E-06  |
| Unigene104771 | Potri.003G152400.4 | 1.0081   | 5.7407    | -2.5096 | Down | 2.87E-12  | 9.24E-12  |
| Unigene19167  | Potri.003G011900.1 | 1.3575   | 7.7306    | -2.5096 | Down | 1.00E-17  | 4.10E-17  |
| Unigene47783  | Potri.002G056000.1 | 3.0645   | 17.4513   | -2.5096 | Down | 1.41E-28  | 8.22E-28  |
| Unigene108439 | Potri.019G109500.1 | 1.2613   | 7.1829    | -2.5097 | Down | 9.39E-07  | 2.17E-06  |
| Unigene33234  | Potri.011G120000.1 | 1.01     | 5.7518    | -2.5097 | Down | 3.70E-23  | 1.83E-22  |
| Unigene95099  | Potri.009G028700.1 | 0.6002   | 3.4181    | -2.5097 | Down | 9.39E-07  | 2.17E-06  |
| Unigene26816  | Potri.009G021700.1 | 0.8422   | 4.7963    | -2.5097 | Down | 9.39E-07  | 2.17E-06  |
| Unigene68507  | Potri.006G027300.6 | 0.7481   | 4.2603    | -2.5097 | Down | 9.39E-07  | 2.17E-06  |
| Unigene39361  | Potri.002G141500.1 | 3.7111   | 21.143    | -2.5103 | Down | 3.87E-47  | 3.56E-46  |
| Unigene80566  | Potri.001G210000.3 | 5.6923   | 32.4387   | -2.5106 | Down | 6.24E-31  | 3.89E-30  |
| Unigene21746  | Potri.008G105100.4 | 8.2524   | 47.0297   | -2.5107 | Down | 9.39E-196 | 4.76E-194 |
| Unigene30183  | Potri.004G145700.4 | 1.1161   | 6.3614    | -2.5109 | Down | 1.62E-25  | 8.62E-25  |
| Unigene46193  | Potri.005G080100.2 | 7.6548   | 43.6339   | -2.511  | Down | 4.33E-44  | 3.72E-43  |
| Unigene103204 | Potri.011G107400.2 | 2.2599   | 12.8829   | -2.5111 | Down | 3.99E-81  | 6.64E-80  |
| Unigene48944  | Potri.019G072600.1 | 1.6733   | 9.5393    | -2.5112 | Down | 4.33E-20  | 1.93E-19  |
| Unigene49055  | Potri.016G048200.1 | 1.3262   | 7.5608    | -2.5112 | Down | 4.33E-20  | 1.93E-19  |
| Unigene1551   | Potri.010G120800.1 | 5.7896   | 33.0093   | -2.5113 | Down | 7.46E-89  | 1.38E-87  |
| Unigene46871  | Potri.018G047700.9 | 7.3091   | 41.6851   | -2.5118 | Down | 6.38E-99  | 1.35E-97  |
| Unigene118252 | Potri.T028800.2    | 4.5185   | 25.772    | -2.5119 | Down | 4.87E-41  | 3.92E-40  |
| Unigene29399  | Potri.012G119000.1 | 1.5773   | 8.9967    | -2.5119 | Down | 1.20E-14  | 4.32E-14  |
| Unigene10790  | Potri.007G009200.1 | 5.908    | 33.7028   | -2.5121 | Down | 4.16E-169 | 1.75E-167 |
| Unigene41912  | Potri.008G194600.1 | 4.9248   | 28.0949   | -2.5122 | Down | 8.74E-49  | 8.32E-48  |
| Unigene20550  | Potri.018G093300.1 | 2.8529   | 16.279    | -2.5125 | Down | 1.88E-22  | 9.06E-22  |
| Unigene83843  | Potri.013G100400.1 | 363.0216 | 2071.3781 | -2.5125 | Down | 0         | 0         |
| Unigene1672   | Potri.011G152500.3 | 1.6701   | 9.5298    | -2.5125 | Down | 1.88E-22  | 9.06E-22  |
| Unigene24632  | Potri.005G256100.1 | 1.7012   | 9.7069    | -2.5125 | Down | 1.88E-22  | 9.06E-22  |

|               |                    |         |          |         |      |           |           |
|---------------|--------------------|---------|----------|---------|------|-----------|-----------|
| Unigene33465  | Potri.001G081600.1 | 9.746   | 55.6111  | -2.5125 | Down | 2.91E-64  | 3.74E-63  |
| Unigene35505  | Potri.013G031200.1 | 9.6099  | 54.8379  | -2.5126 | Down | 7.73E-93  | 1.50E-91  |
| Unigene1109   | Potri.012G039200.1 | 24.0478 | 137.25   | -2.5128 | Down | 0         | 0         |
| Unigene22856  | Potri.003G118900.1 | 2.3015  | 13.1386  | -2.5132 | Down | 5.97E-69  | 8.25E-68  |
| Unigene52001  | Potri.011G003700.1 | 1.3514  | 7.7167   | -2.5135 | Down | 8.22E-25  | 4.28E-24  |
| Unigene47959  | Potri.011G002500.2 | 1.4513  | 8.2872   | -2.5135 | Down | 3.65E-09  | 9.92E-09  |
| Unigene35295  | Potri.008G076100.1 | 1.0827  | 6.1823   | -2.5135 | Down | 5.12E-17  | 2.03E-16  |
| Unigene38965  | Potri.002G190200.1 | 3.2936  | 18.8063  | -2.5135 | Down | 1.40E-32  | 9.12E-32  |
| Unigene105582 | Potri.002G049700.5 | 0.692   | 3.9514   | -2.5135 | Down | 3.65E-09  | 9.92E-09  |
| Unigene118821 | Potri.001G078900.1 | 0.749   | 4.2767   | -2.5135 | Down | 3.65E-09  | 9.92E-09  |
| Unigene84458  | Potri.009G076200.2 | 48.5295 | 277.1195 | -2.5136 | Down | 4.80E-282 | 3.89E-280 |
| Unigene1217   | Potri.007G105600.1 | 22.581  | 128.9586 | -2.5137 | Down | 5.23E-279 | 4.17E-277 |
| Unigene39414  | Potri.007G037700.4 | 4.5929  | 26.2403  | -2.5143 | Down | 3.61E-27  | 2.02E-26  |
| Unigene4472   | Potri.009G045100.2 | 20.7105 | 118.3354 | -2.5144 | Down | 3.40E-157 | 1.30E-155 |
| Unigene13749  | Potri.003G101800.1 | 10.0143 | 57.2287  | -2.5147 | Down | 7.10E-162 | 2.82E-160 |
| Unigene17777  | Potri.001G261600.1 | 3.038   | 17.3651  | -2.515  | Down | 1.59E-29  | 9.55E-29  |
| Unigene42431  | Potri.002G052800.2 | 8.4642  | 48.384   | -2.5151 | Down | 1.04E-254 | 7.34E-253 |
| Unigene81406  | Potri.018G039800.1 | 9.1046  | 52.0509  | -2.5153 | Down | 9.93E-50  | 9.64E-49  |
| Unigene42643  | Potri.006G189300.1 | 8.684   | 49.6538  | -2.5155 | Down | 2.68E-130 | 8.00E-129 |
| Unigene118953 | Potri.016G064600.1 | 3.6527  | 20.8872  | -2.5156 | Down | 5.53E-42  | 4.54E-41  |
| Unigene9903   | Potri.011G154200.1 | 2.8301  | 16.1835  | -2.5156 | Down | 7.06E-32  | 4.52E-31  |
| Unigene51113  | Potri.008G004600.1 | 1.3     | 7.4337   | -2.5156 | Down | 1.48E-11  | 4.60E-11  |
| Unigene67508  | Potri.006G038400.1 | 9.7368  | 55.6783  | -2.5156 | Down | 4.47E-52  | 4.56E-51  |
| Unigene17045  | Potri.005G253500.1 | 0.9397  | 5.3736   | -2.5156 | Down | 1.48E-11  | 4.60E-11  |
| Unigene13662  | Potri.001G144400.4 | 3.1226  | 17.856   | -2.5156 | Down | 3.08E-72  | 4.48E-71  |
| Unigene51849  | Potri.017G001600.1 | 9.1897  | 52.5611  | -2.5159 | Down | 2.01E-54  | 2.15E-53  |
| Unigene119566 | Potri.004G057800.2 | 1.1743  | 6.7167   | -2.516  | Down | 2.48E-44  | 2.14E-43  |
| Unigene3932   | Potri.004G164000.1 | 9.9151  | 56.7171  | -2.5161 | Down | 7.53E-67  | 1.01E-65  |
| Unigene20865  | Potri.004G089800.1 | 17.9325 | 102.5882 | -2.5162 | Down | 9.71E-157 | 3.69E-155 |
| Unigene32995  | Potri.002G155700.1 | 3.6989  | 21.1642  | -2.5165 | Down | 5.05E-94  | 9.96E-93  |
| Unigene38213  | Potri.012G056400.1 | 2.0189  | 11.5528  | -2.5166 | Down | 4.99E-49  | 4.77E-48  |
| Unigene83016  | Potri.T160700.1    | 15.2844 | 87.4708  | -2.5167 | Down | 2.69E-86  | 4.81E-85  |
| Unigene109580 | Potri.014G018000.2 | 2.7629  | 15.8136  | -2.5169 | Down | 6.17E-14  | 2.15E-13  |
| Unigene62322  | Potri.006G275700.2 | 2.4016  | 13.7454  | -2.5169 | Down | 1.83E-26  | 1.00E-25  |
| Unigene106650 | Potri.006G271500.1 | 0.6508  | 3.7249   | -2.5169 | Down | 6.17E-14  | 2.15E-13  |
| Unigene44645  | Potri.007G109100.6 | 18.7706 | 107.4499 | -2.5171 | Down | 1.78E-182 | 8.29E-181 |
| Unigene49211  | Potri.015G077600.1 | 9.8394  | 56.3286  | -2.5172 | Down | 1.77E-120 | 4.79E-119 |
| Unigene10777  | Potri.006G141200.1 | 7.2041  | 41.2415  | -2.5172 | Down | 0         | 0         |
| Unigene70139  | Potri.008G129900.1 | 2.3106  | 13.2291  | -2.5174 | Down | 8.06E-29  | 4.73E-28  |

|               |                    |         |          |         |      |           |           |
|---------------|--------------------|---------|----------|---------|------|-----------|-----------|
| Unigene1116   | Potri.014G149700.1 | 8.7593  | 50.1534  | -2.5175 | Down | 4.96E-236 | 3.16E-234 |
| Unigene49332  | Potri.002G184200.2 | 36.8658 | 211.1125 | -2.5177 | Down | 0         | 0         |
| Unigene37157  | Potri.010G208900.2 | 2.6248  | 15.0322  | -2.5178 | Down | 2.62E-16  | 1.01E-15  |
| Unigene3227   | Potri.008G180400.1 | 10.8363 | 62.0597  | -2.5178 | Down | 1.59E-75  | 2.44E-74  |
| Unigene110487 | Potri.006G280000.1 | 3.1638  | 18.1192  | -2.5178 | Down | 2.62E-16  | 1.01E-15  |
| Unigene2188   | Potri.003G204300.3 | 3.3481  | 19.175   | -2.5178 | Down | 5.59E-46  | 5.01E-45  |
| Unigene1885   | Potri.003G038700.1 | 30.1712 | 172.8262 | -2.5181 | Down | 0         | 0         |
| Unigene12774  | Potri.006G214600.1 | 8.651   | 49.573   | -2.5186 | Down | 5.13E-109 | 1.22E-107 |
| Unigene74225  | Potri.017G155200.2 | 21.1653 | 121.3032 | -2.5188 | Down | 1.31E-96  | 2.68E-95  |
| Unigene33067  | Potri.005G159300.1 | 4.8917  | 28.0345  | -2.5188 | Down | 1.03E-57  | 1.18E-56  |
| Unigene59536  | Potri.012G017200.1 | 4.9264  | 28.2434  | -2.5193 | Down | 2.11E-23  | 1.05E-22  |
| Unigene11579  | Potri.005G106000.1 | 2.3872  | 13.6859  | -2.5193 | Down | 2.81E-45  | 2.48E-44  |
| Unigene19164  | Potri.003G034900.3 | 6.9165  | 39.653   | -2.5193 | Down | 1.17E-110 | 2.85E-109 |
| Unigene38956  | Potri.019G085900.2 | 10.3076 | 59.1014  | -2.5195 | Down | 1.44E-93  | 2.83E-92  |
| Unigene2472   | Potri.005G242900.1 | 5.8312  | 33.4425  | -2.5198 | Down | 2.92E-182 | 1.35E-180 |
| Unigene90764  | Potri.002G118900.1 | 15.8499 | 90.9024  | -2.5198 | Down | 1.00E-131 | 3.03E-130 |
| Unigene10381  | Potri.006G109100.1 | 2.8822  | 16.5307  | -2.5199 | Down | 4.08E-28  | 2.34E-27  |
| Unigene32523  | Potri.005G037600.1 | 3.1391  | 18.0038  | -2.5199 | Down | 3.73E-81  | 6.22E-80  |
| Unigene18340  | Potri.010G251700.4 | 4.8107  | 27.5931  | -2.52   | Down | 2.67E-112 | 6.61E-111 |
| Unigene380    | Potri.017G118900.2 | 7.7669  | 44.5542  | -2.5202 | Down | 1.60E-265 | 1.20E-263 |
| Unigene42921  | Potri.015G105200.4 | 7.4379  | 42.6721  | -2.5203 | Down | 8.30E-160 | 3.23E-158 |
| Unigene16666  | Potri.003G101700.1 | 9.8629  | 56.607   | -2.5209 | Down | 1.41E-44  | 1.23E-43  |
| Unigene88095  | Potri.014G189400.1 | 36.7292 | 210.8802 | -2.5214 | Down | 1.13E-252 | 7.87E-251 |
| Unigene54980  | Potri.009G125600.1 | 10.7458 | 61.713   | -2.5218 | Down | 3.75E-96  | 7.63E-95  |
| Unigene42471  | Potri.003G181900.1 | 21.472  | 123.3421 | -2.5221 | Down | 0         | 0         |
| Unigene93463  | Potri.004G188600.1 | 60.4111 | 347.0729 | -2.5224 | Down | 0         | 0         |
| Unigene92680  | Potri.017G109000.3 | 1.1303  | 6.4946   | -2.5225 | Down | 3.17E-13  | 1.07E-12  |
| Unigene41214  | Potri.016G026300.1 | 0.5595  | 3.2148   | -2.5225 | Down | 5.02E-06  | 1.09E-05  |
| Unigene117084 | Potri.015G072400.1 | 0.9759  | 5.6072   | -2.5225 | Down | 1.91E-08  | 4.98E-08  |
| Unigene1312   | Potri.015G045600.1 | 2.1113  | 12.1314  | -2.5225 | Down | 5.71E-18  | 2.36E-17  |
| Unigene113383 | Potri.015G030100.1 | 0.8811  | 5.0627   | -2.5225 | Down | 5.02E-06  | 1.09E-05  |
| Unigene49615  | Potri.014G047300.6 | 3.4537  | 19.8445  | -2.5225 | Down | 4.69E-25  | 2.46E-24  |
| Unigene29814  | Potri.013G076400.1 | 0.8928  | 5.13     | -2.5225 | Down | 1.91E-08  | 4.98E-08  |
| Unigene75672  | Potri.010G152000.1 | 1.0081  | 5.7925   | -2.5225 | Down | 5.02E-06  | 1.09E-05  |
| Unigene87336  | Potri.008G066900.1 | 1.4255  | 8.1906   | -2.5225 | Down | 7.67E-11  | 2.30E-10  |
| Unigene50518  | Potri.008G002400.2 | 1.4641  | 8.4126   | -2.5225 | Down | 5.71E-18  | 2.36E-17  |
| Unigene4561   | Potri.007G026700.1 | 0.5558  | 3.1935   | -2.5225 | Down | 1.91E-08  | 4.98E-08  |
| Unigene36185  | Potri.005G217800.1 | 1.6062  | 9.2291   | -2.5225 | Down | 1.91E-08  | 4.98E-08  |
| Unigene115245 | Potri.003G094400.1 | 0.7853  | 4.512    | -2.5225 | Down | 5.02E-06  | 1.09E-05  |

|               |                    |         |          |         |      |           |           |
|---------------|--------------------|---------|----------|---------|------|-----------|-----------|
| Unigene110674 | Potri.003G013300.1 | 0.9947  | 5.7152   | -2.5225 | Down | 5.02E-06  | 1.09E-05  |
| Unigene26603  | Potri.001G292100.1 | 1.138   | 6.5386   | -2.5225 | Down | 1.91E-08  | 4.98E-08  |
| Unigene41211  | Potri.001G291900.1 | 0.6544  | 3.76     | -2.5225 | Down | 1.91E-08  | 4.98E-08  |
| Unigene40500  | Potri.001G276900.1 | 5.3285  | 30.6173  | -2.5225 | Down | 6.44E-51  | 6.41E-50  |
| Unigene114295 | Potri.001G248200.1 | 0.8382  | 4.8162   | -2.5225 | Down | 5.02E-06  | 1.09E-05  |
| Unigene113237 | Potri.001G136600.1 | 0.8881  | 5.1029   | -2.5225 | Down | 5.02E-06  | 1.09E-05  |
| Unigene1484   | Potri.017G072900.1 | 1.7691  | 10.1654  | -2.5226 | Down | 2.47E-20  | 1.11E-19  |
| Unigene112754 | Potri.017G057900.1 | 0.9097  | 5.2273   | -2.5226 | Down | 5.02E-06  | 1.09E-05  |
| Unigene9120   | Potri.014G194800.1 | 1.1252  | 6.4656   | -2.5226 | Down | 1.07E-22  | 5.21E-22  |
| Unigene96481  | Potri.012G092900.1 | 0.9646  | 5.5428   | -2.5226 | Down | 7.67E-11  | 2.30E-10  |
| Unigene37782  | Potri.010G186200.1 | 1.1079  | 6.366    | -2.5226 | Down | 5.02E-06  | 1.09E-05  |
| Unigene26714  | Potri.009G022700.1 | 1.1496  | 6.6058   | -2.5226 | Down | 1.91E-08  | 4.98E-08  |
| Unigene69209  | Potri.008G200400.1 | 0.5889  | 3.384    | -2.5226 | Down | 5.02E-06  | 1.09E-05  |
| Unigene8833   | Potri.008G060300.1 | 2.6516  | 15.2361  | -2.5226 | Down | 4.69E-25  | 2.46E-24  |
| Unigene119479 | Potri.006G021300.1 | 1.0361  | 5.9534   | -2.5226 | Down | 2.47E-20  | 1.11E-19  |
| Unigene116035 | Potri.005G213400.3 | 1.097   | 6.3036   | -2.5226 | Down | 1.91E-08  | 4.98E-08  |
| Unigene115725 | Potri.002G228300.3 | 0.7535  | 4.3297   | -2.5226 | Down | 5.02E-06  | 1.09E-05  |
| Unigene14585  | Potri.001G122500.1 | 1.0111  | 5.8099   | -2.5226 | Down | 1.91E-08  | 4.98E-08  |
| Unigene117539 | Potri.010G009700.1 | 0.6081  | 3.4944   | -2.5227 | Down | 5.02E-06  | 1.09E-05  |
| Unigene8200   | Potri.003G018900.1 | 19.0383 | 109.421  | -2.5229 | Down | 4.78E-193 | 2.38E-191 |
| Unigene13884  | Potri.002G006600.1 | 5.2885  | 30.4125  | -2.5237 | Down | 8.27E-120 | 2.22E-118 |
| Unigene1414   | Potri.001G081500.1 | 10.7217 | 61.6607  | -2.5238 | Down | 8.72E-113 | 2.17E-111 |
| Unigene43869  | Potri.002G149200.1 | 9.9038  | 56.96    | -2.5239 | Down | 6.77E-159 | 2.62E-157 |
| Unigene78646  | Potri.019G112400.1 | 8.3062  | 47.7832  | -2.5242 | Down | 3.58E-43  | 3.02E-42  |
| Unigene86461  | Potri.007G052500.8 | 37.0525 | 213.1679 | -2.5243 | Down | 2.47E-236 | 1.58E-234 |
| Unigene40914  | Potri.016G121100.1 | 13.8541 | 79.7143  | -2.5245 | Down | 5.74E-73  | 8.45E-72  |
| Unigene49913  | Potri.009G132900.1 | 11.2591 | 64.7842  | -2.5246 | Down | 8.13E-142 | 2.70E-140 |
| Unigene2361   | Potri.008G055700.1 | 2.9469  | 16.9631  | -2.5251 | Down | 4.60E-29  | 2.72E-28  |
| Unigene29974  | Potri.008G134500.1 | 8.6179  | 49.6149  | -2.5254 | Down | 7.32E-52  | 7.43E-51  |
| Unigene12006  | Potri.001G204900.1 | 3.1164  | 17.9417  | -2.5254 | Down | 1.04E-26  | 5.75E-26  |
| Unigene31615  | Potri.018G039800.1 | 10.253  | 59.0399  | -2.5256 | Down | 1.18E-92  | 2.29E-91  |
| Unigene22597  | Potri.011G058100.3 | 4.1286  | 23.7737  | -2.5256 | Down | 3.62E-47  | 3.34E-46  |
| Unigene46300  | Potri.018G124400.2 | 2.5693  | 14.795   | -2.5257 | Down | 2.38E-24  | 1.22E-23  |
| Unigene17043  | Potri.008G088800.1 | 8.6017  | 49.5344  | -2.5257 | Down | 2.60E-90  | 4.89E-89  |
| Unigene22940  | Potri.016G132000.1 | 6.1787  | 35.5842  | -2.5259 | Down | 2.40E-108 | 5.67E-107 |
| Unigene32397  | Potri.001G461700.1 | 1.694   | 9.7568   | -2.526  | Down | 1.80E-42  | 1.50E-41  |
| Unigene20     | Potri.006G121200.2 | 7.0517  | 40.625   | -2.5263 | Down | 0         | 0         |
| Unigene22110  | Potri.005G226500.1 | 1.3843  | 7.9749   | -2.5263 | Down | 3.36E-58  | 3.87E-57  |
| Unigene13306  | Potri.008G137900.2 | 7.145   | 41.1637  | -2.5264 | Down | 2.69E-94  | 5.34E-93  |



|               |                    |         |          |         |      |           |           |
|---------------|--------------------|---------|----------|---------|------|-----------|-----------|
| Unigene17980  | Potri.002G260800.1 | 23.2737 | 134.0891 | -2.5264 | Down | 1.85E-238 | 1.19E-236 |
| Unigene12252  | Potri.006G181800.1 | 1.377   | 7.9338   | -2.5265 | Down | 1.25E-19  | 5.51E-19  |
| Unigene48825  | Potri.018G115500.1 | 12.5467 | 72.3019  | -2.5267 | Down | 4.48E-204 | 2.38E-202 |
| Unigene65010  | Potri.014G042700.3 | 1.9536  | 11.2577  | -2.5267 | Down | 2.02E-35  | 1.42E-34  |
| Unigene47435  | Potri.009G121200.1 | 5.3821  | 31.0154  | -2.5267 | Down | 2.02E-35  | 1.42E-34  |
| Unigene13544  | Potri.019G091300.1 | 6.8609  | 39.5399  | -2.5268 | Down | 1.27E-100 | 2.74E-99  |
| Unigene31739  | Potri.009G038300.4 | 11.4071 | 65.7399  | -2.5268 | Down | 1.27E-100 | 2.74E-99  |
| Unigene11305  | Potri.005G036700.1 | 8.699   | 50.1515  | -2.5274 | Down | 1.15E-162 | 4.62E-161 |
| Unigene4035   | Potri.004G071000.1 | 4.6312  | 26.7002  | -2.5274 | Down | 1.03E-30  | 6.36E-30  |
| Unigene71964  | Potri.016G011400.1 | 22.7436 | 131.141  | -2.5276 | Down | 6.36E-100 | 1.36E-98  |
| Unigene116982 | Potri.001G403000.2 | 1.865   | 10.7555  | -2.5278 | Down | 6.85E-15  | 2.48E-14  |
| Unigene6791   | Potri.001G041600.1 | 1.1243  | 6.4838   | -2.5278 | Down | 6.85E-15  | 2.48E-14  |
| Unigene25213  | Potri.017G057400.5 | 1.1183  | 6.4495   | -2.5279 | Down | 6.85E-15  | 2.48E-14  |
| Unigene103803 | Potri.014G051300.1 | 1.321   | 7.6184   | -2.5279 | Down | 6.85E-15  | 2.48E-14  |
| Unigene38966  | Potri.002G181700.1 | 1.0802  | 6.2297   | -2.5279 | Down | 6.85E-15  | 2.48E-14  |
| Unigene53236  | Potri.008G136500.1 | 15.786  | 91.0564  | -2.5281 | Down | 1.48E-90  | 2.80E-89  |
| Unigene93173  | Potri.017G139400.2 | 3.3033  | 19.0546  | -2.5282 | Down | 2.03E-39  | 1.57E-38  |
| Unigene71049  | Potri.014G127700.1 | 76.6303 | 442.0373 | -2.5282 | Down | 0         | 0         |
| Unigene23294  | Potri.008G131700.2 | 9.1316  | 52.6811  | -2.5283 | Down | 1.33E-196 | 6.79E-195 |
| Unigene6335   | Potri.010G208200.1 | 5.5061  | 31.7654  | -2.5284 | Down | 5.28E-26  | 2.85E-25  |
| Unigene4960   | Potri.015G147600.3 | 13.0284 | 75.1691  | -2.5285 | Down | 1.38E-156 | 5.24E-155 |
| Unigene104098 | Potri.T037300.1    | 0.6299  | 3.6356   | -2.529  | Down | 1.63E-12  | 5.32E-12  |
| Unigene101498 | Potri.010G237700.1 | 1.518   | 8.7613   | -2.529  | Down | 1.63E-12  | 5.32E-12  |
| Unigene106824 | Potri.005G227900.1 | 0.688   | 3.9709   | -2.529  | Down | 1.63E-12  | 5.32E-12  |
| Unigene45761  | Potri.001G084400.1 | 2.3844  | 13.7621  | -2.529  | Down | 1.63E-12  | 5.32E-12  |
| Unigene37529  | Potri.001G009700.1 | 1.7883  | 10.3215  | -2.529  | Down | 1.63E-12  | 5.32E-12  |
| Unigene23162  | Potri.005G253600.5 | 4.4467  | 25.6699  | -2.5293 | Down | 1.88E-54  | 2.01E-53  |
| Unigene43918  | Potri.003G176500.1 | 8.4452  | 48.7783  | -2.53   | Down | 1.92E-58  | 2.22E-57  |
| Unigene38928  | Potri.001G296100.1 | 4.803   | 27.7443  | -2.5302 | Down | 1.02E-38  | 7.76E-38  |
| Unigene36099  | Potri.004G065800.8 | 26.6701 | 154.078  | -2.5304 | Down | 0         | 0         |
| Unigene45686  | Potri.014G176400.1 | 5.6205  | 32.4785  | -2.5307 | Down | 3.99E-97  | 8.23E-96  |
| Unigene42345  | Potri.013G039000.4 | 1.5483  | 8.9469   | -2.5307 | Down | 3.98E-10  | 1.14E-09  |
| Unigene114615 | Potri.011G107400.1 | 1.5029  | 8.6847   | -2.5307 | Down | 3.98E-10  | 1.14E-09  |
| Unigene96629  | Potri.005G256100.1 | 0.6544  | 3.7814   | -2.5307 | Down | 3.98E-10  | 1.14E-09  |
| Unigene41749  | Potri.004G063500.1 | 0.9138  | 5.2805   | -2.5307 | Down | 6.38E-19  | 2.73E-18  |
| Unigene27680  | Potri.003G148200.1 | 1.2358  | 7.1413   | -2.5307 | Down | 3.98E-10  | 1.14E-09  |
| Unigene19578  | Potri.001G100300.1 | 0.6492  | 3.7515   | -2.5307 | Down | 3.98E-10  | 1.14E-09  |
| Unigene107073 | Potri.008G129900.1 | 0.7905  | 4.5683   | -2.5308 | Down | 3.98E-10  | 1.14E-09  |
| Unigene23274  | Potri.010G143000.1 | 1.0702  | 6.1867   | -2.5313 | Down | 5.15E-34  | 3.48E-33  |

|               |                    |         |          |         |      |           |           |
|---------------|--------------------|---------|----------|---------|------|-----------|-----------|
| Unigene35394  | Potri.004G090700.1 | 5.3471  | 30.9117  | -2.5313 | Down | 5.15E-34  | 3.48E-33  |
| Unigene21861  | Potri.005G186900.1 | 7.7226  | 44.6455  | -2.5314 | Down | 9.84E-155 | 3.67E-153 |
| Unigene38059  | Potri.004G228300.1 | 32.6199 | 188.6184 | -2.5316 | Down | 1.13E-188 | 5.48E-187 |
| Unigene36935  | Potri.016G056600.5 | 3.0195  | 17.4614  | -2.5318 | Down | 2.14E-55  | 2.33E-54  |
| Unigene19698  | Potri.018G134100.1 | 1.1618  | 6.7195   | -2.532  | Down | 1.49E-16  | 5.80E-16  |
| Unigene53452  | Potri.010G132600.1 | 2.8926  | 16.7302  | -2.532  | Down | 1.49E-16  | 5.80E-16  |
| Unigene7525   | Potri.010G120700.2 | 4.7603  | 27.5324  | -2.532  | Down | 1.00E-121 | 2.75E-120 |
| Unigene65084  | Potri.007G070700.7 | 8.5642  | 49.5334  | -2.532  | Down | 9.86E-62  | 1.21E-60  |
| Unigene37761  | Potri.004G082900.2 | 8.3199  | 48.1417  | -2.5326 | Down | 4.70E-72  | 6.82E-71  |
| Unigene28789  | Potri.013G114400.3 | 1.8847  | 10.906   | -2.5327 | Down | 1.05E-50  | 1.04E-49  |
| Unigene42769  | Potri.018G147000.1 | 2.3354  | 13.5149  | -2.5328 | Down | 4.84E-57  | 5.44E-56  |
| Unigene941    | Potri.014G112700.2 | 5.5789  | 32.2866  | -2.5329 | Down | 1.23E-152 | 4.51E-151 |
| Unigene24778  | Potri.008G015400.1 | 5.8174  | 33.672   | -2.5331 | Down | 5.17E-42  | 4.25E-41  |
| Unigene12516  | Potri.006G113600.1 | 12.9424 | 74.9301  | -2.5334 | Down | 9.56E-243 | 6.34E-241 |
| Unigene94170  | Potri.003G133600.2 | 27.9266 | 161.673  | -2.5334 | Down | 0         | 0         |
| Unigene10193  | Potri.019G072800.2 | 0.7751  | 4.4882   | -2.5337 | Down | 1.00E-07  | 2.49E-07  |
| Unigene117008 | Potri.010G141700.1 | 0.8751  | 5.0673   | -2.5337 | Down | 1.00E-07  | 2.49E-07  |
| Unigene1650   | Potri.T085100.1    | 1.4772  | 8.5543   | -2.5338 | Down | 3.51E-14  | 1.23E-13  |
| Unigene29565  | Potri.015G129700.1 | 3.3217  | 19.2352  | -2.5338 | Down | 1.16E-39  | 8.99E-39  |
| Unigene18826  | Potri.010G190300.1 | 2.0896  | 12.1006  | -2.5338 | Down | 2.59E-33  | 1.73E-32  |
| Unigene41150  | Potri.010G164700.4 | 1.3145  | 7.6122   | -2.5338 | Down | 1.00E-07  | 2.49E-07  |
| Unigene6225   | Potri.008G173000.2 | 4.4759  | 25.9195  | -2.5338 | Down | 1.40E-20  | 6.37E-20  |
| Unigene37708  | Potri.008G105700.1 | 0.8     | 4.6326   | -2.5338 | Down | 1.00E-07  | 2.49E-07  |
| Unigene43865  | Potri.008G105100.4 | 7.1903  | 41.6377  | -2.5338 | Down | 2.42E-90  | 4.55E-89  |
| Unigene35159  | Potri.001G413000.1 | 0.6751  | 3.9094   | -2.5338 | Down | 1.00E-07  | 2.49E-07  |
| Unigene18294  | Potri.001G020300.1 | 9.7039  | 56.1939  | -2.5338 | Down | 2.38E-52  | 2.44E-51  |
| Unigene59893  | Potri.016G047500.5 | 0.6939  | 4.0185   | -2.5339 | Down | 1.00E-07  | 2.49E-07  |
| Unigene2315   | Potri.T043200.1    | 9.8799  | 57.228   | -2.5342 | Down | 1.41E-142 | 4.70E-141 |
| Unigene50835  | Potri.008G105100.1 | 6.1603  | 35.6848  | -2.5342 | Down | 2.75E-117 | 7.20E-116 |
| Unigene22568  | Potri.T146100.3    | 14.737  | 85.3739  | -2.5344 | Down | 0         | 0         |
| Unigene49397  | Potri.001G232800.1 | 5.8143  | 33.6847  | -2.5344 | Down | 1.16E-43  | 9.92E-43  |
| Unigene71609  | Potri.013G150300.1 | 8.2278  | 47.6707  | -2.5345 | Down | 2.59E-37  | 1.91E-36  |
| Unigene50004  | Potri.010G052200.1 | 7.6466  | 44.3043  | -2.5346 | Down | 6.75E-138 | 2.17E-136 |
| Unigene37209  | Potri.016G011700.1 | 10.4774 | 60.7293  | -2.5351 | Down | 3.82E-160 | 1.49E-158 |
| Unigene97196  | Potri.014G039700.1 | 3.0227  | 17.52    | -2.5351 | Down | 2.60E-41  | 2.11E-40  |
| Unigene87210  | Potri.005G049400.2 | 21.3994 | 124.0332 | -2.5351 | Down | 1.61E-143 | 5.41E-142 |
| Unigene32731  | Potri.002G133000.1 | 5.3644  | 31.0937  | -2.5351 | Down | 3.37E-137 | 1.08E-135 |
| Unigene43762  | Potri.006G214600.1 | 4.8447  | 28.0835  | -2.5352 | Down | 2.76E-91  | 5.25E-90  |
| Unigene117459 | Potri.016G116200.3 | 2.1578  | 12.5094  | -2.5354 | Down | 3.25E-18  | 1.35E-17  |

|               |                    |         |          |         |      |           |           |
|---------------|--------------------|---------|----------|---------|------|-----------|-----------|
| Unigene38696  | Potri.009G168500.1 | 1.4559  | 8.4404   | -2.5354 | Down | 3.25E-18  | 1.35E-17  |
| Unigene9208   | Potri.002G072900.2 | 10.0853 | 58.4669  | -2.5354 | Down | 1.20E-51  | 1.21E-50  |
| Unigene60074  | Potri.001G291700.1 | 3.2911  | 19.0795  | -2.5354 | Down | 3.25E-18  | 1.35E-17  |
| Unigene10859  | Potri.002G007700.1 | 1.9002  | 11.0193  | -2.5358 | Down | 5.76E-66  | 7.61E-65  |
| Unigene10983  | Potri.013G135700.1 | 12.2719 | 71.1714  | -2.5359 | Down | 5.08E-283 | 4.14E-281 |
| Unigene23716  | Potri.T046200.1    | 31.1047 | 180.4119 | -2.5361 | Down | 0         | 0         |
| Unigene58220  | Potri.010G121500.2 | 0.9325  | 5.4095   | -2.5363 | Down | 8.42E-12  | 2.64E-11  |
| Unigene33418  | Potri.009G130500.1 | 1.2245  | 7.1034   | -2.5363 | Down | 3.10E-22  | 1.48E-21  |
| Unigene101474 | Potri.014G023100.1 | 1.8867  | 10.9454  | -2.5364 | Down | 8.42E-12  | 2.64E-11  |
| Unigene104286 | Potri.008G019900.1 | 0.8597  | 4.9875   | -2.5364 | Down | 8.42E-12  | 2.64E-11  |
| Unigene21456  | Potri.007G132700.1 | 7.0475  | 40.8882  | -2.5365 | Down | 7.26E-216 | 4.11E-214 |
| Unigene17574  | Potri.003G174800.2 | 44.7779 | 259.8113 | -2.5366 | Down | 0         | 0         |
| Unigene30208  | Potri.008G197200.1 | 4.3739  | 25.3939  | -2.5375 | Down | 2.95E-30  | 1.81E-29  |
| Unigene10958  | Potri.001G298400.1 | 1.576   | 9.1502   | -2.5375 | Down | 7.61E-16  | 2.88E-15  |
| Unigene8318   | Potri.014G143600.1 | 8.0177  | 46.5698  | -2.5381 | Down | 3.58E-93  | 6.99E-92  |
| Unigene33326  | Potri.009G120800.1 | 8.033   | 46.6634  | -2.5383 | Down | 1.10E-137 | 3.52E-136 |
| Unigene4484   | Potri.014G112700.2 | 10.4864 | 60.9213  | -2.5384 | Down | 1.45E-64  | 1.87E-63  |
| Unigene11404  | Potri.008G095600.1 | 3.0268  | 17.5842  | -2.5384 | Down | 3.99E-105 | 9.05E-104 |
| Unigene8724   | Potri.004G093800.1 | 35.4212 | 205.7829 | -2.5384 | Down | 0         | 0         |
| Unigene10730  | Potri.012G034300.1 | 12.3829 | 71.9816  | -2.5393 | Down | 0         | 0         |
| Unigene50803  | Potri.004G193500.1 | 2.3382  | 13.595   | -2.5396 | Down | 6.82E-52  | 6.92E-51  |
| Unigene12864  | Potri.008G009400.1 | 8.7032  | 50.6222  | -2.5402 | Down | 1.37E-135 | 4.30E-134 |
| Unigene105952 | Potri.016G139500.1 | 0.5921  | 3.4444   | -2.5403 | Down | 2.71E-05  | 5.51E-05  |
| Unigene108789 | Potri.017G083300.2 | 0.8881  | 5.1667   | -2.5404 | Down | 2.71E-05  | 5.51E-05  |
| Unigene114954 | Potri.016G100400.3 | 0.6685  | 3.8889   | -2.5404 | Down | 2.71E-05  | 5.51E-05  |
| Unigene109036 | Potri.015G130800.1 | 0.8839  | 5.1422   | -2.5404 | Down | 2.71E-05  | 5.51E-05  |
| Unigene24856  | Potri.014G193400.1 | 0.6301  | 3.6655   | -2.5404 | Down | 2.71E-05  | 5.51E-05  |
| Unigene106277 | Potri.010G167300.2 | 0.6895  | 4.0111   | -2.5404 | Down | 2.07E-09  | 5.71E-09  |
| Unigene2147   | Potri.008G200200.2 | 2.6796  | 15.5891  | -2.5404 | Down | 1.48E-41  | 1.21E-40  |
| Unigene95301  | Potri.006G186600.1 | 1.0537  | 6.1299   | -2.5404 | Down | 2.07E-09  | 5.71E-09  |
| Unigene31065  | Potri.005G147200.1 | 0.7853  | 4.5684   | -2.5404 | Down | 2.07E-09  | 5.71E-09  |
| Unigene95018  | Potri.005G127100.2 | 0.5774  | 3.3591   | -2.5404 | Down | 2.71E-05  | 5.51E-05  |
| Unigene115385 | Potri.003G189200.2 | 0.6476  | 3.7674   | -2.5404 | Down | 2.71E-05  | 5.51E-05  |
| Unigene111137 | Potri.002G111200.1 | 0.8109  | 4.7174   | -2.5404 | Down | 2.71E-05  | 5.51E-05  |
| Unigene118720 | Potri.001G177300.3 | 1.1705  | 6.8096   | -2.5404 | Down | 1.80E-13  | 6.14E-13  |
| Unigene119476 | Potri.018G081700.1 | 1.518   | 8.8314   | -2.5405 | Down | 1.49E-29  | 8.95E-29  |
| Unigene111095 | Potri.018G005000.1 | 0.8144  | 4.738    | -2.5405 | Down | 2.71E-05  | 5.51E-05  |
| Unigene107947 | Potri.017G007200.1 | 0.9142  | 5.3186   | -2.5405 | Down | 2.71E-05  | 5.51E-05  |
| Unigene10319  | Potri.016G137600.1 | 3.8692  | 22.5104  | -2.5405 | Down | 1.57E-21  | 7.37E-21  |

|               |                    |         |          |         |      |           |           |
|---------------|--------------------|---------|----------|---------|------|-----------|-----------|
| Unigene7689   | Potri.015G041200.1 | 2.0988  | 12.2106  | -2.5405 | Down | 1.49E-29  | 8.95E-29  |
| Unigene51907  | Potri.014G131300.1 | 1.3534  | 7.8737   | -2.5405 | Down | 1.57E-21  | 7.37E-21  |
| Unigene101445 | Potri.009G030500.2 | 0.9053  | 5.267    | -2.5405 | Down | 1.80E-13  | 6.14E-13  |
| Unigene26500  | Potri.008G151100.2 | 0.6757  | 3.9312   | -2.5405 | Down | 2.71E-05  | 5.51E-05  |
| Unigene41120  | Potri.006G133200.5 | 4.5959  | 26.738   | -2.5405 | Down | 1.79E-77  | 2.83E-76  |
| Unigene94528  | Potri.006G105800.1 | 0.5283  | 3.0737   | -2.5405 | Down | 2.71E-05  | 5.51E-05  |
| Unigene117972 | Potri.005G147300.1 | 0.9395  | 5.466    | -2.5405 | Down | 2.07E-09  | 5.71E-09  |
| Unigene98493  | Potri.003G216500.1 | 0.6311  | 3.6717   | -2.5405 | Down | 2.07E-09  | 5.71E-09  |
| Unigene107752 | Potri.003G177000.1 | 0.9187  | 5.3448   | -2.5405 | Down | 2.71E-05  | 5.51E-05  |
| Unigene5295   | Potri.001G264800.1 | 3.575   | 20.7987  | -2.5405 | Down | 1.52E-25  | 8.09E-25  |
| Unigene71859  | Potri.001G162500.1 | 0.9097  | 5.2927   | -2.5405 | Down | 2.71E-05  | 5.51E-05  |
| Unigene94773  | Potri.001G057700.1 | 0.5744  | 3.3419   | -2.5405 | Down | 1.80E-13  | 6.14E-13  |
| Unigene46508  | Potri.001G048900.1 | 1.2058  | 7.0151   | -2.5405 | Down | 1.80E-13  | 6.14E-13  |
| Unigene96225  | Potri.011G087900.3 | 0.5939  | 3.4554   | -2.5406 | Down | 2.07E-09  | 5.71E-09  |
| Unigene116265 | Potri.005G225800.1 | 0.5958  | 3.4665   | -2.5406 | Down | 2.71E-05  | 5.51E-05  |
| Unigene88029  | Potri.018G018400.1 | 26.2012 | 152.4819 | -2.5409 | Down | 2.65E-184 | 1.25E-182 |
| Unigene67994  | Potri.018G024300.4 | 9.4444  | 54.9971  | -2.5418 | Down | 7.20E-128 | 2.09E-126 |
| Unigene34067  | Potri.008G108100.1 | 2.1906  | 12.7572  | -2.5419 | Down | 3.33E-31  | 2.09E-30  |
| Unigene106649 | Potri.015G028300.2 | 2.7439  | 15.9817  | -2.5421 | Down | 3.38E-27  | 1.89E-26  |
| Unigene35507  | Potri.002G072900.1 | 4.6807  | 27.2629  | -2.5421 | Down | 7.74E-53  | 8.00E-52  |
| Unigene46986  | Potri.001G017000.1 | 4.9119  | 28.6092  | -2.5421 | Down | 3.38E-27  | 1.89E-26  |
| Unigene48234  | Potri.016G019500.1 | 1.2204  | 7.1084   | -2.5422 | Down | 3.38E-27  | 1.89E-26  |
| Unigene105370 | Potri.008G025300.1 | 1.9747  | 11.504   | -2.5424 | Down | 3.48E-23  | 1.72E-22  |
| Unigene102492 | Potri.017G085600.1 | 2.3648  | 13.7811  | -2.5429 | Down | 3.63E-19  | 1.57E-18  |
| Unigene17308  | Potri.007G022000.1 | 1.8735  | 10.9179  | -2.5429 | Down | 7.43E-37  | 5.41E-36  |
| Unigene116673 | Potri.006G063700.2 | 2.5018  | 14.5794  | -2.5429 | Down | 3.63E-19  | 1.57E-18  |
| Unigene79981  | Potri.012G071600.4 | 5.9375  | 34.6085  | -2.5432 | Down | 7.45E-33  | 4.90E-32  |
| Unigene20285  | Potri.008G065100.1 | 1.6587  | 9.6683   | -2.5432 | Down | 7.45E-33  | 4.90E-32  |
| Unigene82485  | Potri.003G142500.1 | 39.8621 | 232.3687 | -2.5433 | Down | 1.57E-225 | 9.40E-224 |
| Unigene63507  | Potri.T114300.1    | 3.0632  | 17.8601  | -2.5436 | Down | 3.89E-15  | 1.43E-14  |
| Unigene11101  | Potri.014G047500.1 | 8.1996  | 47.8145  | -2.5438 | Down | 1.88E-230 | 1.16E-228 |
| Unigene352    | Potri.002G025200.1 | 9.8983  | 57.7233  | -2.5439 | Down | 0         | 0         |
| Unigene766    | Potri.010G051900.2 | 6.3178  | 36.8473  | -2.5441 | Down | 5.45E-85  | 9.57E-84  |
| Unigene80257  | Potri.003G142500.1 | 55.5718 | 324.2474 | -2.5447 | Down | 3.05E-296 | 2.66E-294 |
| Unigene50740  | Potri.016G004900.2 | 4.7415  | 27.6699  | -2.5449 | Down | 8.63E-50  | 8.40E-49  |
| Unigene36531  | Potri.010G191900.4 | 1.1968  | 6.9841   | -2.5449 | Down | 4.35E-11  | 1.32E-10  |
| Unigene95397  | Potri.006G138500.1 | 0.8846  | 5.1621   | -2.5449 | Down | 4.35E-11  | 1.32E-10  |
| Unigene21014  | Potri.002G187400.1 | 1.3605  | 7.9393   | -2.5449 | Down | 7.99E-21  | 3.65E-20  |
| Unigene41938  | Potri.011G164700.1 | 1.0011  | 5.8451   | -2.5456 | Down | 1.71E-26  | 9.37E-26  |

|               |                    |         |          |         |      |           |           |
|---------------|--------------------|---------|----------|---------|------|-----------|-----------|
| Unigene98254  | Potri.015G032800.1 | 3.968   | 23.1706  | -2.5458 | Down | 8.44E-42  | 6.90E-41  |
| Unigene24526  | Potri.002G122000.1 | 1.6143  | 9.4284   | -2.5461 | Down | 8.46E-17  | 3.33E-16  |
| Unigene22810  | Potri.019G031400.1 | 9.5352  | 55.6953  | -2.5462 | Down | 1.36E-83  | 2.35E-82  |
| Unigene22738  | Potri.002G050900.1 | 11.9758 | 69.9545  | -2.5463 | Down | 8.95E-156 | 3.37E-154 |
| Unigene84543  | Potri.007G097100.2 | 47.1926 | 275.6792 | -2.5464 | Down | 8.55E-285 | 7.04E-283 |
| Unigene44338  | Potri.002G178200.1 | 3.6322  | 21.2214  | -2.5466 | Down | 1.90E-43  | 1.61E-42  |
| Unigene45921  | Potri.013G047500.2 | 15.8824 | 92.8149  | -2.5469 | Down | 1.07E-160 | 4.18E-159 |
| Unigene11401  | Potri.002G160200.1 | 8.0111  | 46.8137  | -2.5469 | Down | 4.06E-102 | 8.92E-101 |
| Unigene92200  | Potri.003G083600.1 | 11.0038 | 64.3312  | -2.5475 | Down | 4.99E-111 | 1.22E-109 |
| Unigene48520  | Potri.019G007200.1 | 1.0614  | 6.2075   | -2.548  | Down | 5.31E-07  | 1.25E-06  |
| Unigene36955  | Potri.017G142700.2 | 0.603   | 3.5266   | -2.548  | Down | 5.31E-07  | 1.25E-06  |
| Unigene117221 | Potri.013G048900.2 | 0.7439  | 4.3505   | -2.548  | Down | 5.31E-07  | 1.25E-06  |
| Unigene112887 | Potri.001G453500.1 | 1.0571  | 6.1823   | -2.548  | Down | 5.31E-07  | 1.25E-06  |
| Unigene25698  | Potri.017G083500.2 | 1.0361  | 6.0597   | -2.5481 | Down | 5.31E-07  | 1.25E-06  |
| Unigene102850 | Potri.016G100500.5 | 0.9791  | 5.7264   | -2.5481 | Down | 1.85E-18  | 7.77E-18  |
| Unigene103296 | Potri.016G092600.1 | 0.7679  | 4.4913   | -2.5481 | Down | 5.31E-07  | 1.25E-06  |
| Unigene100484 | Potri.016G085500.1 | 0.6269  | 3.6664   | -2.5481 | Down | 9.27E-13  | 3.05E-12  |
| Unigene35723  | Potri.016G024600.1 | 1.0834  | 6.3363   | -2.5481 | Down | 5.31E-07  | 1.25E-06  |
| Unigene26105  | Potri.014G087000.4 | 0.759   | 4.4391   | -2.5481 | Down | 5.31E-07  | 1.25E-06  |
| Unigene20481  | Potri.008G092400.1 | 1.4075  | 8.232    | -2.5481 | Down | 9.27E-13  | 3.05E-12  |
| Unigene118735 | Potri.006G149000.1 | 1.0879  | 6.3627   | -2.5481 | Down | 9.27E-13  | 3.05E-12  |
| Unigene46504  | Potri.005G254000.1 | 7.912   | 46.2739  | -2.5481 | Down | 2.21E-52  | 2.27E-51  |
| Unigene27382  | Potri.009G118800.1 | 0.8236  | 4.8172   | -2.5482 | Down | 5.31E-07  | 1.25E-06  |
| Unigene118804 | Potri.006G254800.1 | 0.5285  | 3.0912   | -2.5482 | Down | 5.31E-07  | 1.25E-06  |
| Unigene27082  | Potri.005G003600.2 | 8.0731  | 47.2314  | -2.5486 | Down | 2.68E-65  | 3.50E-64  |
| Unigene12363  | Potri.012G103300.1 | 5.0195  | 29.3695  | -2.5487 | Down | 1.02E-100 | 2.19E-99  |
| Unigene54121  | Potri.012G071600.4 | 15.1063 | 88.4075  | -2.549  | Down | 6.08E-67  | 8.15E-66  |
| Unigene76343  | Potri.008G171600.2 | 18.4011 | 107.6964 | -2.5491 | Down | 4.16E-91  | 7.90E-90  |
| Unigene119127 | Potri.012G093000.2 | 1.9063  | 11.1588  | -2.5493 | Down | 8.65E-26  | 4.64E-25  |
| Unigene43069  | Potri.004G233100.2 | 8.5688  | 50.1636  | -2.5495 | Down | 2.84E-111 | 6.97E-110 |
| Unigene11781  | Potri.001G093900.1 | 4.8512  | 28.4008  | -2.5495 | Down | 4.02E-87  | 7.25E-86  |
| Unigene81553  | Potri.003G220900.1 | 58.9479 | 345.12   | -2.5496 | Down | 0         | 0         |
| Unigene30221  | Potri.014G071200.1 | 3.7462  | 21.9352  | -2.5497 | Down | 4.06E-20  | 1.81E-19  |
| Unigene40882  | Potri.006G063500.2 | 3.2373  | 18.9553  | -2.5497 | Down | 4.06E-20  | 1.81E-19  |
| Unigene73077  | Potri.002G102700.1 | 4.1047  | 24.0342  | -2.5497 | Down | 4.06E-20  | 1.81E-19  |
| Unigene42926  | Potri.006G274800.1 | 1.6403  | 9.6045   | -2.5498 | Down | 9.50E-39  | 7.22E-38  |
| Unigene12829  | Potri.002G045500.1 | 3.298   | 19.3169  | -2.5502 | Down | 5.79E-59  | 6.76E-58  |
| Unigene8551   | Potri.006G242100.1 | 1.3292  | 7.7864   | -2.5504 | Down | 1.99E-14  | 7.09E-14  |
| Unigene40742  | Potri.005G248300.1 | 1.8195  | 10.6589  | -2.5504 | Down | 1.99E-14  | 7.09E-14  |

|               |                    |         |          |         |      |           |           |
|---------------|--------------------|---------|----------|---------|------|-----------|-----------|
| Unigene31999  | Potri.001G319600.2 | 5.4738  | 32.0644  | -2.5504 | Down | 3.04E-149 | 1.08E-147 |
| Unigene52476  | Potri.009G053400.3 | 5.6837  | 33.2963  | -2.5505 | Down | 2.13E-40  | 1.69E-39  |
| Unigene45013  | Potri.002G080000.1 | 3.443   | 20.1699  | -2.5505 | Down | 2.13E-40  | 1.69E-39  |
| Unigene45883  | Potri.010G250800.2 | 7.9928  | 46.8281  | -2.5506 | Down | 2.01E-86  | 3.60E-85  |
| Unigene16772  | Potri.010G132600.1 | 6.7887  | 39.7743  | -2.5506 | Down | 1.61E-73  | 2.39E-72  |
| Unigene16489  | Potri.016G113600.1 | 30.0366 | 175.9926 | -2.5507 | Down | 1.93E-198 | 9.95E-197 |
| Unigene44782  | Potri.002G014400.1 | 4.4081  | 25.8333  | -2.551  | Down | 3.66E-75  | 5.58E-74  |
| Unigene3151   | Potri.017G125200.1 | 5.972   | 35.0053  | -2.5513 | Down | 5.58E-97  | 1.15E-95  |
| Unigene60383  | Potri.018G138100.1 | 4.6454  | 27.2317  | -2.5514 | Down | 4.29E-29  | 2.54E-28  |
| Unigene8094   | Potri.012G086500.1 | 6.2018  | 36.3671  | -2.5519 | Down | 2.90E-58  | 3.35E-57  |
| Unigene86148  | Potri.006G240300.1 | 8.7616  | 51.3777  | -2.5519 | Down | 2.90E-58  | 3.35E-57  |
| Unigene84354  | Potri.019G079300.1 | 20.2598 | 118.821  | -2.5521 | Down | 1.04E-123 | 2.90E-122 |
| Unigene8838   | Potri.008G156800.2 | 0.6038  | 3.5415   | -2.5522 | Down | 1.08E-08  | 2.85E-08  |
| Unigene41113  | Potri.006G111100.2 | 1.0204  | 5.985    | -2.5522 | Down | 1.08E-08  | 2.85E-08  |
| Unigene102494 | Potri.005G029000.1 | 1.2297  | 7.2127   | -2.5522 | Down | 1.08E-08  | 2.85E-08  |
| Unigene19992  | Potri.016G143400.3 | 1.3428  | 7.8763   | -2.5523 | Down | 1.08E-08  | 2.85E-08  |
| Unigene111209 | Potri.013G075500.3 | 1.4595  | 8.5612   | -2.5523 | Down | 1.08E-08  | 2.85E-08  |
| Unigene49734  | Potri.010G183200.2 | 3.0704  | 18.0098  | -2.5523 | Down | 1.98E-23  | 9.83E-23  |
| Unigene95628  | Potri.008G086900.1 | 0.7235  | 4.2437   | -2.5523 | Down | 1.08E-08  | 2.85E-08  |
| Unigene110423 | Potri.008G041800.1 | 1.5054  | 8.8299   | -2.5523 | Down | 1.08E-08  | 2.85E-08  |
| Unigene44301  | Potri.006G228900.4 | 0.9172  | 5.38     | -2.5523 | Down | 1.08E-08  | 2.85E-08  |
| Unigene4269   | Potri.005G076300.1 | 1.1265  | 6.6076   | -2.5523 | Down | 1.08E-08  | 2.85E-08  |
| Unigene112520 | Potri.005G018700.1 | 1.3758  | 8.07     | -2.5523 | Down | 1.08E-08  | 2.85E-08  |
| Unigene117318 | Potri.004G019500.1 | 0.9456  | 5.5467   | -2.5523 | Down | 1.08E-08  | 2.85E-08  |
| Unigene31101  | Potri.002G106600.1 | 1.2573  | 7.3748   | -2.5523 | Down | 4.32E-16  | 1.65E-15  |
| Unigene45769  | Potri.001G375900.1 | 0.6893  | 4.0433   | -2.5523 | Down | 1.08E-08  | 2.85E-08  |
| Unigene31158  | Potri.009G115500.1 | 6.9626  | 40.855   | -2.5528 | Down | 5.49E-47  | 5.04E-46  |
| Unigene52433  | Potri.008G050400.1 | 9.9851  | 58.5886  | -2.5528 | Down | 1.45E-99  | 3.09E-98  |
| Unigene40012  | Potri.015G073900.1 | 1.9232  | 11.2868  | -2.5531 | Down | 2.14E-32  | 1.39E-31  |
| Unigene44502  | Potri.008G032900.1 | 7.9071  | 46.4127  | -2.5533 | Down | 4.98E-119 | 1.33E-117 |
| Unigene11398  | Potri.007G103400.1 | 4.4652  | 26.2095  | -2.5533 | Down | 1.40E-95  | 2.81E-94  |
| Unigene28981  | Potri.006G134500.1 | 3.8608  | 22.6659  | -2.5536 | Down | 3.18E-97  | 6.56E-96  |
| Unigene47148  | Potri.005G129200.1 | 2.5695  | 15.0918  | -2.5542 | Down | 9.72E-27  | 5.37E-26  |
| Unigene43903  | Potri.008G200200.3 | 8.0696  | 47.3979  | -2.5543 | Down | 4.61E-111 | 1.13E-109 |
| Unigene45048  | Potri.008G186400.1 | 2.6156  | 15.3638  | -2.5543 | Down | 7.46E-61  | 9.01E-60  |
| Unigene42572  | Potri.005G180100.1 | 2.7292  | 16.0313  | -2.5543 | Down | 5.35E-213 | 2.98E-211 |
| Unigene31703  | Potri.004G162800.2 | 1.4863  | 8.7309   | -2.5544 | Down | 1.07E-35  | 7.57E-35  |
| Unigene1440   | Potri.017G010900.2 | 13.1336 | 77.1631  | -2.5546 | Down | 5.94E-184 | 2.80E-182 |
| Unigene33000  | Potri.017G050500.1 | 5.7798  | 33.9583  | -2.5547 | Down | 4.52E-141 | 1.49E-139 |

|               |                    |         |          |         |      |           |           |
|---------------|--------------------|---------|----------|---------|------|-----------|-----------|
| Unigene70364  | Potri.006G134500.1 | 3.9215  | 23.0402  | -2.5547 | Down | 2.02E-71  | 2.91E-70  |
| Unigene52937  | Potri.001G082100.1 | 45.3549 | 266.4864 | -2.5547 | Down | 0         | 0         |
| Unigene98735  | Potri.018G098500.1 | 0.8767  | 5.1519   | -2.5549 | Down | 2.25E-10  | 6.56E-10  |
| Unigene13109  | Potri.013G115500.1 | 0.7698  | 4.5237   | -2.5549 | Down | 2.25E-10  | 6.56E-10  |
| Unigene117909 | Potri.001G376200.1 | 1.0467  | 6.1508   | -2.5549 | Down | 2.25E-10  | 6.57E-10  |
| Unigene30449  | Potri.016G066000.4 | 4.2298  | 24.8568  | -2.555  | Down | 2.16E-28  | 1.25E-27  |
| Unigene11567  | Potri.007G101600.1 | 6.8765  | 40.4097  | -2.555  | Down | 1.90E-135 | 5.96E-134 |
| Unigene18041  | Potri.002G079400.2 | 4.9011  | 28.8017  | -2.555  | Down | 3.83E-64  | 4.90E-63  |
| Unigene66175  | Potri.001G405500.1 | 1.7167  | 10.0883  | -2.555  | Down | 2.25E-10  | 6.56E-10  |
| Unigene103825 | Potri.001G370900.1 | 1.2211  | 7.1759   | -2.555  | Down | 2.25E-10  | 6.57E-10  |
| Unigene10231  | Potri.019G098500.2 | 12.4332 | 73.0718  | -2.5551 | Down | 3.50E-128 | 1.02E-126 |
| Unigene21383  | Potri.006G128500.1 | 7.8792  | 46.3116  | -2.5553 | Down | 1.20E-266 | 9.05E-265 |
| Unigene119116 | Potri.011G164400.2 | 2.2393  | 13.1653  | -2.5556 | Down | 4.83E-30  | 2.93E-29  |
| Unigene7216   | Potri.006G190900.3 | 2.9469  | 17.3259  | -2.5557 | Down | 4.83E-30  | 2.93E-29  |
| Unigene12660  | Potri.018G151300.1 | 16.1103 | 94.7265  | -2.5558 | Down | 6.88E-241 | 4.51E-239 |
| Unigene77593  | Potri.007G004100.1 | 13.3442 | 78.4651  | -2.5558 | Down | 4.47E-69  | 6.19E-68  |
| Unigene52639  | Potri.010G128600.1 | 12.5505 | 73.7992  | -2.5559 | Down | 1.48E-88  | 2.73E-87  |
| Unigene35104  | Potri.007G101600.1 | 4.3433  | 25.5399  | -2.5559 | Down | 5.05E-108 | 1.19E-106 |
| Unigene22007  | Potri.019G035500.1 | 16.5663 | 97.4519  | -2.5564 | Down | 3.41E-266 | 2.57E-264 |
| Unigene21672  | Potri.010G057100.1 | 9.6711  | 56.898   | -2.5566 | Down | 0         | 0         |
| Unigene21035  | Potri.002G150000.1 | 1.1798  | 6.942    | -2.5568 | Down | 4.77E-12  | 1.52E-11  |
| Unigene66818  | Potri.001G418400.1 | 1.672   | 9.8384   | -2.5568 | Down | 4.77E-12  | 1.52E-11  |
| Unigene34241  | Potri.001G313000.1 | 3.3342  | 19.6189  | -2.5568 | Down | 1.19E-75  | 1.82E-74  |
| Unigene118521 | Potri.011G063800.1 | 1.0775  | 6.3403   | -2.5569 | Down | 4.77E-12  | 1.52E-11  |
| Unigene37435  | Potri.002G042700.1 | 1.0799  | 6.3545   | -2.5569 | Down | 4.77E-12  | 1.52E-11  |
| Unigene32410  | Potri.003G018500.1 | 17.6825 | 104.0777 | -2.5573 | Down | 0         | 0         |
| Unigene10982  | Potri.012G143900.1 | 4.0958  | 24.1179  | -2.5579 | Down | 2.87E-108 | 6.78E-107 |
| Unigene36652  | Potri.014G157400.2 | 2.6899  | 15.8422  | -2.5581 | Down | 1.02E-13  | 3.52E-13  |
| Unigene32250  | Potri.004G171600.1 | 19.643  | 115.6811 | -2.5581 | Down | 1.74E-146 | 6.07E-145 |
| Unigene96505  | Potri.017G043600.1 | 1.3952  | 8.2174   | -2.5582 | Down | 4.92E-26  | 2.65E-25  |
| Unigene44576  | Potri.016G067300.1 | 1.3449  | 7.9211   | -2.5582 | Down | 1.02E-13  | 3.52E-13  |
| Unigene22793  | Potri.013G119600.1 | 1.2189  | 7.1791   | -2.5582 | Down | 1.02E-13  | 3.52E-13  |
| Unigene36784  | Potri.010G063500.1 | 7.6018  | 44.7716  | -2.5582 | Down | 9.62E-63  | 1.20E-61  |
| Unigene119403 | Potri.006G187900.1 | 1.5101  | 8.8939   | -2.5582 | Down | 4.92E-26  | 2.65E-25  |
| Unigene35781  | Potri.001G290600.2 | 0.9885  | 5.8219   | -2.5582 | Down | 1.02E-13  | 3.52E-13  |
| Unigene58313  | Potri.010G167200.2 | 7.1263  | 41.9821  | -2.5585 | Down | 6.11E-40  | 4.78E-39  |
| Unigene1695   | Potri.003G038700.1 | 21.0062 | 123.7472 | -2.5585 | Down | 0         | 0         |
| Unigene41455  | Potri.005G052100.3 | 1.9332  | 11.394   | -2.5592 | Down | 2.21E-15  | 8.18E-15  |
| Unigene8548   | Potri.012G048700.1 | 13.1007 | 77.2239  | -2.5594 | Down | 1.29E-129 | 3.82E-128 |

|               |                    |         |          |         |      |           |           |
|---------------|--------------------|---------|----------|---------|------|-----------|-----------|
| Unigene12021  | Potri.T164900.1    | 6.8051  | 40.116   | -2.5595 | Down | 4.22E-88  | 7.71E-87  |
| Unigene736    | Potri.005G211400.2 | 9.6257  | 56.7444  | -2.5595 | Down | 1.12E-203 | 5.91E-202 |
| Unigene17101  | Potri.001G430000.1 | 2.7649  | 16.2989  | -2.5595 | Down | 6.96E-45  | 6.09E-44  |
| Unigene48779  | Potri.T000200.1    | 6.1826  | 36.4522  | -2.5597 | Down | 6.74E-76  | 1.04E-74  |
| Unigene29916  | Potri.004G040300.3 | 9.0858  | 53.5803  | -2.56   | Down | 3.54E-48  | 3.33E-47  |
| Unigene110207 | Potri.002G261000.3 | 3.2067  | 18.9107  | -2.56   | Down | 4.80E-17  | 1.91E-16  |
| Unigene84046  | Potri.012G127500.1 | 38.7915 | 228.9826 | -2.5614 | Down | 4.26E-235 | 2.69E-233 |
| Unigene7329   | Potri.006G076200.1 | 2.6643  | 15.7296  | -2.5617 | Down | 5.07E-22  | 2.41E-21  |
| Unigene48775  | Potri.003G121500.1 | 5.6985  | 33.6471  | -2.5618 | Down | 1.61E-127 | 4.66E-126 |
| Unigene21431  | Potri.015G002100.1 | 5.1908  | 30.6521  | -2.562  | Down | 2.88E-195 | 1.46E-193 |
| Unigene30688  | Potri.015G146600.6 | 3.0243  | 17.8601  | -2.5621 | Down | 1.12E-23  | 5.63E-23  |
| Unigene8110   | Potri.010G057100.1 | 3.73    | 22.0274  | -2.5621 | Down | 7.88E-46  | 7.04E-45  |
| Unigene93287  | Potri.003G094000.1 | 36.6299 | 216.3652 | -2.5624 | Down | 0         | 0         |
| Unigene90917  | Potri.016G121100.1 | 25.8947 | 152.9858 | -2.5627 | Down | 4.42E-228 | 2.68E-226 |
| Unigene40881  | Potri.009G060800.1 | 13.5635 | 80.149   | -2.563  | Down | 1.06E-109 | 2.55E-108 |
| Unigene32776  | Potri.014G095300.3 | 19.4039 | 114.681  | -2.5632 | Down | 0         | 0         |
| Unigene40828  | Potri.011G138200.1 | 17.8998 | 105.7959 | -2.5633 | Down | 3.66E-148 | 1.29E-146 |
| Unigene11008  | Potri.013G041200.1 | 2.7055  | 15.9944  | -2.5636 | Down | 1.67E-97  | 3.45E-96  |
| Unigene14656  | Potri.001G123500.1 | 7.7482  | 45.815   | -2.5639 | Down | 6.88E-37  | 5.01E-36  |
| Unigene119289 | Potri.008G072600.2 | 2.9817  | 17.6379  | -2.5645 | Down | 3.96E-45  | 3.48E-44  |
| Unigene50064  | Potri.015G056400.1 | 5.051   | 29.8877  | -2.5649 | Down | 5.24E-55  | 5.65E-54  |
| Unigene35727  | Potri.005G127100.1 | 15.2004 | 89.9443  | -2.5649 | Down | 2.64E-108 | 6.25E-107 |
| Unigene81481  | Potri.006G006000.1 | 40.6638 | 240.6385 | -2.5651 | Down | 1.63E-229 | 9.99E-228 |
| Unigene23891  | Potri.019G119500.1 | 1.5655  | 9.2649   | -2.5652 | Down | 3.11E-63  | 3.92E-62  |
| Unigene7483   | Potri.006G175200.1 | 9.7553  | 57.7335  | -2.5652 | Down | 7.13E-183 | 3.32E-181 |
| Unigene50080  | Potri.012G072400.2 | 4.656   | 27.5619  | -2.5655 | Down | 2.18E-76  | 3.39E-75  |
| Unigene30276  | Potri.011G081200.4 | 12.7683 | 75.6045  | -2.5659 | Down | 5.80E-106 | 1.33E-104 |
| Unigene113264 | Potri.018G152500.1 | 0.5921  | 3.5082   | -2.5668 | Down | 1.48E-04  | 2.80E-04  |
| Unigene115030 | Potri.015G114800.1 | 0.531   | 3.1462   | -2.5668 | Down | 1.48E-04  | 2.80E-04  |
| Unigene102131 | Potri.012G077000.1 | 0.6701  | 3.9704   | -2.5668 | Down | 2.83E-06  | 6.27E-06  |
| Unigene5181   | Potri.012G041600.1 | 0.5761  | 3.4134   | -2.5668 | Down | 1.48E-04  | 2.80E-04  |
| Unigene113939 | Potri.009G134100.3 | 0.5695  | 3.3743   | -2.5668 | Down | 1.48E-04  | 2.80E-04  |
| Unigene100635 | Potri.006G095800.4 | 0.5348  | 3.1687   | -2.5668 | Down | 1.48E-04  | 2.80E-04  |
| Unigene115306 | Potri.002G071100.2 | 0.5199  | 3.0804   | -2.5668 | Down | 1.48E-04  | 2.80E-04  |
| Unigene116164 | Potri.019G071200.1 | 1.2032  | 7.1296   | -2.5669 | Down | 1.17E-09  | 3.28E-09  |
| Unigene99015  | Potri.018G114300.2 | 1.0507  | 6.2259   | -2.5669 | Down | 2.83E-06  | 6.27E-06  |
| Unigene104682 | Potri.018G023100.3 | 3.0885  | 18.3009  | -2.5669 | Down | 5.68E-23  | 2.79E-22  |
| Unigene69346  | Potri.017G125200.1 | 2.2853  | 13.5416  | -2.5669 | Down | 1.26E-24  | 6.50E-24  |
| Unigene108104 | Potri.017G119600.2 | 0.7278  | 4.3126   | -2.5669 | Down | 1.48E-04  | 2.80E-04  |



|               |                    |        |         |         |      |          |          |
|---------------|--------------------|--------|---------|---------|------|----------|----------|
| Unigene31252  | Potri.017G041800.4 | 4.4909 | 26.6109 | -2.5669 | Down | 3.09E-31 | 1.94E-30 |
| Unigene4876   | Potri.017G028300.3 | 0.6844 | 4.0554  | -2.5669 | Down | 2.83E-06 | 6.27E-06 |
| Unigene101939 | Potri.016G026400.1 | 0.5526 | 3.2744  | -2.5669 | Down | 1.48E-04 | 2.80E-04 |
| Unigene29374  | Potri.015G141900.1 | 2.9065 | 17.2222 | -2.5669 | Down | 3.46E-36 | 2.48E-35 |
| Unigene117261 | Potri.015G047600.1 | 0.634  | 3.7567  | -2.5669 | Down | 2.83E-06 | 6.27E-06 |
| Unigene117176 | Potri.015G008200.1 | 0.855  | 5.0663  | -2.5669 | Down | 5.67E-08 | 1.43E-07 |
| Unigene85016  | Potri.014G149600.1 | 2.1014 | 12.4518 | -2.5669 | Down | 1.13E-14 | 4.06E-14 |
| Unigene485    | Potri.014G129200.1 | 0.735  | 4.355   | -2.5669 | Down | 1.48E-04 | 2.80E-04 |
| Unigene111386 | Potri.014G015700.2 | 0.6431 | 3.8107  | -2.5669 | Down | 1.48E-04 | 2.80E-04 |
| Unigene105490 | Potri.013G152100.1 | 1.2671 | 7.5081  | -2.5669 | Down | 1.13E-14 | 4.06E-14 |
| Unigene36108  | Potri.013G060200.5 | 0.5968 | 3.5363  | -2.5669 | Down | 2.83E-06 | 6.27E-06 |
| Unigene48629  | Potri.012G109200.1 | 1.1804 | 6.9943  | -2.5669 | Down | 1.17E-09 | 3.28E-09 |
| Unigene41292  | Potri.011G158500.1 | 1.535  | 9.0954  | -2.5669 | Down | 1.17E-09 | 3.28E-09 |
| Unigene99910  | Potri.010G177800.1 | 1.0361 | 6.1394  | -2.5669 | Down | 5.67E-08 | 1.43E-07 |
| Unigene41375  | Potri.008G173900.6 | 1.1206 | 6.64    | -2.5669 | Down | 5.25E-13 | 1.75E-12 |
| Unigene112077 | Potri.008G125000.1 | 0.6243 | 3.6991  | -2.5669 | Down | 1.48E-04 | 2.80E-04 |
| Unigene118336 | Potri.008G110400.1 | 0.5217 | 3.0912  | -2.5669 | Down | 2.83E-06 | 6.27E-06 |
| Unigene39595  | Potri.008G064200.1 | 2.5795 | 15.2848 | -2.5669 | Down | 8.82E-43 | 7.38E-42 |
| Unigene111412 | Potri.008G058700.2 | 0.6431 | 3.8107  | -2.5669 | Down | 1.48E-04 | 2.80E-04 |
| Unigene4702   | Potri.008G058500.2 | 2.2049 | 13.0651 | -2.5669 | Down | 2.46E-11 | 7.56E-11 |
| Unigene46590  | Potri.006G242500.1 | 1.2644 | 7.4922  | -2.5669 | Down | 1.17E-09 | 3.28E-09 |
| Unigene112873 | Potri.006G005500.1 | 3.0202 | 17.8962 | -2.5669 | Down | 5.34E-18 | 2.21E-17 |
| Unigene1304   | Potri.005G168300.1 | 0.9537 | 5.651   | -2.5669 | Down | 2.45E-16 | 9.45E-16 |
| Unigene20114  | Potri.005G044900.5 | 1.1372 | 6.7384  | -2.5669 | Down | 1.17E-09 | 3.28E-09 |
| Unigene55408  | Potri.003G207200.3 | 2.0072 | 11.8934 | -2.5669 | Down | 2.46E-11 | 7.56E-11 |
| Unigene112966 | Potri.003G159600.1 | 0.6016 | 3.5648  | -2.5669 | Down | 1.48E-04 | 2.80E-04 |
| Unigene5962   | Potri.003G093200.2 | 1.4501 | 8.5925  | -2.5669 | Down | 2.45E-16 | 9.45E-16 |
| Unigene40530  | Potri.002G173200.1 | 0.7744 | 4.5886  | -2.5669 | Down | 2.46E-11 | 7.56E-11 |
| Unigene76536  | Potri.002G023400.2 | 0.6602 | 3.9118  | -2.5669 | Down | 1.48E-04 | 2.80E-04 |
| Unigene24007  | Potri.001G467800.3 | 1.2716 | 7.5347  | -2.5669 | Down | 2.46E-11 | 7.56E-11 |
| Unigene45904  | Potri.001G406000.1 | 1.1477 | 6.8006  | -2.5669 | Down | 2.46E-11 | 7.56E-11 |
| Unigene112751 | Potri.001G156100.1 | 1.213  | 7.1876  | -2.5669 | Down | 5.67E-08 | 1.43E-07 |
| Unigene117689 | Potri.T099700.5    | 0.5936 | 3.5175  | -2.567  | Down | 2.83E-06 | 6.27E-06 |
| Unigene116705 | Potri.T010900.3    | 0.6802 | 4.0307  | -2.567  | Down | 2.83E-06 | 6.27E-06 |
| Unigene31460  | Potri.018G106600.1 | 2.9164 | 17.2813 | -2.567  | Down | 6.90E-33 | 4.54E-32 |
| Unigene17550  | Potri.018G055400.1 | 1.0199 | 6.0435  | -2.567  | Down | 5.25E-13 | 1.75E-12 |
| Unigene118159 | Potri.015G003900.1 | 0.9053 | 5.3645  | -2.567  | Down | 1.17E-09 | 3.28E-09 |
| Unigene98255  | Potri.014G098400.1 | 1.0191 | 6.0388  | -2.567  | Down | 1.17E-09 | 3.28E-09 |
| Unigene44345  | Potri.012G077400.4 | 3.3835 | 20.0492 | -2.567  | Down | 3.46E-36 | 2.48E-35 |

|               |                    |          |          |         |      |           |           |
|---------------|--------------------|----------|----------|---------|------|-----------|-----------|
| Unigene52411  | Potri.008G178200.1 | 1.5423   | 9.139    | -2.567  | Down | 6.90E-33  | 4.54E-32  |
| Unigene97566  | Potri.008G142300.1 | 0.5546   | 3.2865   | -2.567  | Down | 1.48E-04  | 2.80E-04  |
| Unigene46492  | Potri.008G097700.1 | 0.9605   | 5.6915   | -2.567  | Down | 2.83E-06  | 6.27E-06  |
| Unigene6545   | Potri.005G045600.1 | 2.3385   | 13.857   | -2.567  | Down | 5.34E-18  | 2.21E-17  |
| Unigene103713 | Potri.004G210200.6 | 0.6939   | 4.112    | -2.567  | Down | 1.48E-04  | 2.80E-04  |
| Unigene44809  | Potri.002G079400.2 | 1.4075   | 8.3403   | -2.567  | Down | 2.46E-11  | 7.56E-11  |
| Unigene106549 | Potri.001G126700.1 | 0.5469   | 3.2407   | -2.567  | Down | 1.17E-09  | 3.28E-09  |
| Unigene141    | Potri.015G066000.2 | 10.3916  | 61.6069  | -2.5677 | Down | 7.25E-296 | 6.30E-294 |
| Unigene34039  | Potri.018G030500.3 | 21.501   | 127.5049 | -2.5681 | Down | 7.17E-191 | 3.53E-189 |
| Unigene32417  | Potri.005G137700.1 | 3.0372   | 18.0153  | -2.5684 | Down | 5.46E-75  | 8.30E-74  |
| Unigene18506  | Potri.015G006100.1 | 3.9294   | 23.3158  | -2.5689 | Down | 1.95E-110 | 4.73E-109 |
| Unigene15831  | Potri.005G087100.2 | 25.5139  | 151.3922 | -2.5689 | Down | 6.47E-164 | 2.61E-162 |
| Unigene21821  | Potri.009G067800.2 | 5.574    | 33.079   | -2.5691 | Down | 1.39E-100 | 3.01E-99  |
| Unigene47654  | Potri.016G011800.1 | 15.0814  | 89.51    | -2.5693 | Down | 5.19E-94  | 1.03E-92  |
| Unigene21065  | Potri.001G190300.1 | 5.9636   | 35.3957  | -2.5693 | Down | 5.07E-47  | 4.65E-46  |
| Unigene41830  | Potri.003G092400.1 | 2.147    | 12.745   | -2.5695 | Down | 9.98E-44  | 8.51E-43  |
| Unigene93701  | Potri.012G011700.2 | 41.4704  | 246.1825 | -2.5696 | Down | 0         | 0         |
| Unigene27803  | Potri.019G093800.1 | 109.7115 | 651.3697 | -2.5698 | Down | 0         | 0         |
| Unigene48121  | Potri.001G424000.2 | 12.7567  | 75.7394  | -2.5698 | Down | 1.41E-77  | 2.23E-76  |
| Unigene44127  | Potri.004G164000.1 | 3.8648   | 22.9491  | -2.57   | Down | 3.91E-37  | 2.86E-36  |
| Unigene83466  | Potri.002G011800.1 | 14.7817  | 87.8121  | -2.5706 | Down | 5.02E-90  | 9.40E-89  |
| Unigene21135  | Potri.001G248200.1 | 2.8946   | 17.1968  | -2.5707 | Down | 1.56E-30  | 9.59E-30  |
| Unigene36507  | Potri.016G007500.1 | 4.8788   | 28.9944  | -2.5712 | Down | 3.13E-27  | 1.76E-26  |
| Unigene20157  | Potri.010G110700.1 | 7.7926   | 46.3168  | -2.5714 | Down | 3.10E-75  | 4.74E-74  |
| Unigene31975  | Potri.001G086100.1 | 6.1098   | 36.3146  | -2.5714 | Down | 4.39E-222 | 2.58E-220 |
| Unigene11803  | Potri.014G087600.1 | 4.0285   | 23.9484  | -2.5716 | Down | 2.95E-94  | 5.85E-93  |
| Unigene3468   | Potri.007G093200.7 | 1.5305   | 9.0997   | -2.5718 | Down | 6.36E-24  | 3.22E-23  |
| Unigene51200  | Potri.012G134500.1 | 32.1859  | 191.4199 | -2.5722 | Down | 0         | 0         |
| Unigene40450  | Potri.009G160400.1 | 3.3067   | 19.6651  | -2.5722 | Down | 2.88E-22  | 1.38E-21  |
| Unigene39117  | Potri.009G159700.1 | 1.8631   | 11.08    | -2.5722 | Down | 5.01E-43  | 4.21E-42  |
| Unigene94792  | Potri.004G209000.1 | 2.4095   | 14.3296  | -2.5722 | Down | 2.88E-22  | 1.38E-21  |
| Unigene60012  | Potri.003G146500.1 | 3.4794   | 20.6924  | -2.5722 | Down | 2.88E-22  | 1.38E-21  |
| Unigene39746  | Potri.002G168400.1 | 4.5413   | 27.0076  | -2.5722 | Down | 1.00E-63  | 1.28E-62  |
| Unigene4538   | Potri.001G078000.1 | 7.5022   | 44.6249  | -2.5725 | Down | 1.96E-60  | 2.34E-59  |
| Unigene78060  | Potri.003G015300.1 | 3.6662   | 21.8099  | -2.5726 | Down | 1.31E-20  | 5.93E-20  |
| Unigene28158  | Potri.002G160000.1 | 1.3748   | 8.1787   | -2.5726 | Down | 1.31E-20  | 5.93E-20  |
| Unigene86284  | Potri.019G093800.1 | 58.063   | 345.4588 | -2.5728 | Down | 0         | 0         |
| Unigene119514 | Potri.016G142200.1 | 1.6428   | 9.7748   | -2.5729 | Down | 4.41E-38  | 3.30E-37  |
| Unigene16934  | Potri.009G092300.1 | 2.1578   | 12.8416  | -2.5732 | Down | 5.95E-19  | 2.55E-18  |

|               |                    |         |          |         |      |           |           |
|---------------|--------------------|---------|----------|---------|------|-----------|-----------|
| Unigene32218  | Potri.007G013800.1 | 1.9153  | 11.4004  | -2.5734 | Down | 5.85E-68  | 7.97E-67  |
| Unigene19530  | Potri.001G083800.2 | 3.2221  | 19.1806  | -2.5736 | Down | 1.46E-50  | 1.45E-49  |
| Unigene44147  | Potri.014G159300.4 | 14.2456 | 84.8224  | -2.5739 | Down | 3.14E-110 | 7.61E-109 |
| Unigene11716  | Potri.002G260300.1 | 9.6191  | 57.2825  | -2.5741 | Down | 5.80E-198 | 2.98E-196 |
| Unigene21488  | Potri.004G000300.1 | 7.5294  | 44.8444  | -2.5743 | Down | 0         | 0         |
| Unigene95081  | Potri.002G179500.2 | 2.8057  | 16.7142  | -2.5746 | Down | 1.25E-15  | 4.68E-15  |
| Unigene98615  | Potri.002G000200.2 | 1.485   | 8.8464   | -2.5746 | Down | 1.25E-15  | 4.68E-15  |
| Unigene32909  | Potri.012G004000.1 | 2.4223  | 14.4353  | -2.5752 | Down | 2.50E-120 | 6.77E-119 |
| Unigene40535  | Potri.001G018800.2 | 5.8698  | 34.9819  | -2.5752 | Down | 2.93E-67  | 3.95E-66  |
| Unigene38644  | Potri.017G073900.1 | 1.5986  | 9.5296   | -2.5756 | Down | 5.78E-14  | 2.01E-13  |
| Unigene52048  | Potri.017G007600.1 | 1.6456  | 9.8099   | -2.5756 | Down | 5.78E-14  | 2.01E-13  |
| Unigene119135 | Potri.015G110100.1 | 0.9483  | 5.6532   | -2.5757 | Down | 5.78E-14  | 2.01E-13  |
| Unigene119115 | Potri.004G085500.1 | 0.9613  | 5.7309   | -2.5757 | Down | 5.78E-14  | 2.01E-13  |
| Unigene117960 | Potri.004G072100.4 | 1.4164  | 8.444    | -2.5757 | Down | 5.78E-14  | 2.01E-13  |
| Unigene2860   | Potri.003G221800.1 | 1.2006  | 7.1575   | -2.5757 | Down | 5.78E-14  | 2.01E-13  |
| Unigene35730  | Potri.002G215800.2 | 10.9855 | 65.5074  | -2.5761 | Down | 3.88E-73  | 5.73E-72  |
| Unigene24328  | Potri.002G251000.1 | 8.3693  | 49.912   | -2.5762 | Down | 3.44E-107 | 8.00E-106 |
| Unigene45455  | Potri.013G083400.1 | 2.425   | 14.4629  | -2.5763 | Down | 1.71E-71  | 2.46E-70  |
| Unigene34303  | Potri.008G189200.1 | 2.2325  | 13.3168  | -2.5765 | Down | 9.89E-36  | 6.99E-35  |
| Unigene94714  | Potri.007G006400.1 | 1.3267  | 7.9161   | -2.5769 | Down | 3.22E-23  | 1.59E-22  |
| Unigene48678  | Potri.011G015500.1 | 1.7442  | 10.4077  | -2.577  | Down | 2.70E-12  | 8.69E-12  |
| Unigene42153  | Potri.004G005900.1 | 2.0037  | 11.9559  | -2.577  | Down | 2.70E-12  | 8.69E-12  |
| Unigene470    | Potri.001G032500.1 | 6.8682  | 40.9821  | -2.577  | Down | 9.59E-56  | 1.05E-54  |
| Unigene86058  | Potri.001G100800.2 | 59.1518 | 353.0074 | -2.5772 | Down | 0         | 0         |
| Unigene13753  | Potri.001G166800.1 | 6.7313  | 40.1852  | -2.5777 | Down | 1.94E-72  | 2.84E-71  |
| Unigene14982  | Potri.017G100400.1 | 1.7904  | 10.6893  | -2.5778 | Down | 1.46E-21  | 6.84E-21  |
| Unigene61809  | Potri.008G111200.1 | 7.4599  | 44.5386  | -2.5778 | Down | 1.26E-41  | 1.03E-40  |
| Unigene11172  | Potri.003G125000.1 | 2.0764  | 12.3963  | -2.5778 | Down | 2.09E-92  | 4.04E-91  |
| Unigene55743  | Potri.013G032200.1 | 2.1904  | 13.0804  | -2.5781 | Down | 8.83E-31  | 5.48E-30  |
| Unigene4890   | Potri.011G066500.1 | 3.73    | 22.2766  | -2.5783 | Down | 5.62E-40  | 4.40E-39  |
| Unigene94382  | Potri.007G109100.3 | 52.1421 | 311.4041 | -2.5783 | Down | 0         | 0         |
| Unigene99426  | Potri.019G076300.1 | 0.9935  | 5.9353   | -2.5787 | Down | 1.27E-10  | 3.76E-10  |
| Unigene37018  | Potri.015G017400.1 | 1.0941  | 6.5368   | -2.5788 | Down | 1.27E-10  | 3.76E-10  |
| Unigene69980  | Potri.011G154200.1 | 2.4135  | 14.4194  | -2.5788 | Down | 3.96E-29  | 2.34E-28  |
| Unigene37191  | Potri.007G131300.9 | 1.7762  | 10.6117  | -2.5788 | Down | 1.27E-10  | 3.76E-10  |
| Unigene37462  | Potri.006G177000.1 | 14.6012 | 87.2348  | -2.5788 | Down | 2.38E-93  | 4.65E-92  |
| Unigene8638   | Potri.004G124000.2 | 2.5018  | 14.9469  | -2.5788 | Down | 6.63E-20  | 2.94E-19  |
| Unigene37956  | Potri.003G216200.1 | 1.2396  | 7.4057   | -2.5788 | Down | 1.27E-10  | 3.76E-10  |
| Unigene21314  | Potri.001G191300.2 | 8.0386  | 48.031   | -2.5789 | Down | 0         | 0         |

|               |                    |         |          |         |      |           |           |
|---------------|--------------------|---------|----------|---------|------|-----------|-----------|
| Unigene20168  | Potri.001G369400.1 | 1.521   | 9.0904   | -2.5793 | Down | 1.11E-36  | 8.07E-36  |
| Unigene39297  | Potri.004G030700.4 | 2.5349  | 15.1507  | -2.5794 | Down | 1.11E-36  | 8.07E-36  |
| Unigene92632  | Potri.001G466200.1 | 94.7302 | 566.2758 | -2.5796 | Down | 0         | 0         |
| Unigene21114  | Potri.013G028900.1 | 6.2074  | 37.1077  | -2.5797 | Down | 6.15E-96  | 1.25E-94  |
| Unigene44322  | Potri.017G033300.2 | 4.54    | 27.1418  | -2.5798 | Down | 3.21E-44  | 2.77E-43  |
| Unigene18198  | Potri.002G055400.7 | 9.0231  | 53.9454  | -2.5798 | Down | 4.03E-120 | 1.09E-118 |
| Unigene5612   | Potri.012G017200.3 | 3.0387  | 18.1693  | -2.58   | Down | 1.89E-68  | 2.59E-67  |
| Unigene49642  | Potri.006G240500.7 | 1.2433  | 7.4343   | -2.58   | Down | 3.02E-18  | 1.26E-17  |
| Unigene62554  | Potri.001G114100.1 | 4.0765  | 24.3746  | -2.58   | Down | 4.97E-35  | 3.44E-34  |
| Unigene19510  | Potri.002G031300.1 | 1.0163  | 6.0771   | -2.5801 | Down | 3.02E-18  | 1.26E-17  |
| Unigene22831  | Potri.001G079900.1 | 5.9576  | 35.6272  | -2.5802 | Down | 2.79E-59  | 3.27E-58  |
| Unigene119494 | Potri.T081800.1    | 1.1809  | 7.0631   | -2.5804 | Down | 8.00E-26  | 4.29E-25  |
| Unigene51926  | Potri.013G114400.5 | 3.6918  | 22.0813  | -2.5804 | Down | 8.00E-26  | 4.29E-25  |
| Unigene59135  | Potri.011G128800.1 | 4.1051  | 24.5534  | -2.5804 | Down | 4.17E-50  | 4.08E-49  |
| Unigene15763  | Potri.002G019500.1 | 2.1808  | 13.044   | -2.5805 | Down | 8.00E-26  | 4.29E-25  |
| Unigene3330   | Potri.019G109400.1 | 7.5548  | 45.2182  | -2.5814 | Down | 1.41E-174 | 6.16E-173 |
| Unigene26203  | Potri.018G093900.1 | 0.8198  | 4.9066   | -2.5814 | Down | 1.39E-16  | 5.41E-16  |
| Unigene14074  | Potri.017G122600.1 | 1.0142  | 6.0703   | -2.5814 | Down | 6.10E-09  | 1.63E-08  |
| Unigene101336 | Potri.008G156100.2 | 0.5141  | 3.077    | -2.5814 | Down | 6.10E-09  | 1.63E-08  |
| Unigene44608  | Potri.008G056000.1 | 2.7367  | 16.3798  | -2.5814 | Down | 5.93E-92  | 1.14E-90  |
| Unigene35744  | Potri.005G254000.1 | 1.1116  | 6.6532   | -2.5814 | Down | 6.10E-09  | 1.63E-08  |
| Unigene46796  | Potri.T143600.1    | 1.0899  | 6.5236   | -2.5815 | Down | 6.10E-09  | 1.63E-08  |
| Unigene5412   | Potri.019G039000.1 | 0.9122  | 5.4599   | -2.5815 | Down | 6.10E-09  | 1.63E-08  |
| Unigene104224 | Potri.008G130400.2 | 0.725   | 4.3397   | -2.5815 | Down | 6.10E-09  | 1.63E-08  |
| Unigene46022  | Potri.006G239300.1 | 1.3929  | 8.3372   | -2.5815 | Down | 1.39E-16  | 5.41E-16  |
| Unigene47257  | Potri.003G082800.1 | 1.3646  | 8.1677   | -2.5815 | Down | 6.10E-09  | 1.63E-08  |
| Unigene11058  | Potri.002G094000.1 | 5.4189  | 32.4389  | -2.5817 | Down | 2.46E-216 | 1.40E-214 |
| Unigene27872  | Potri.008G152600.1 | 5.2429  | 31.3896  | -2.5818 | Down | 3.16E-60  | 3.77E-59  |
| Unigene27536  | Potri.001G235500.3 | 6.8557  | 41.0615  | -2.5824 | Down | 4.72E-51  | 4.70E-50  |
| Unigene89753  | Potri.018G114100.1 | 62.8852 | 376.7225 | -2.5827 | Down | 0         | 0         |
| Unigene43158  | Potri.T012700.1    | 1.4776  | 8.8524   | -2.5828 | Down | 5.61E-36  | 3.99E-35  |
| Unigene53689  | Potri.014G189900.6 | 2.4459  | 14.6577  | -2.5832 | Down | 6.39E-15  | 2.32E-14  |
| Unigene24622  | Potri.006G153300.1 | 1.5109  | 9.0544   | -2.5832 | Down | 6.39E-15  | 2.32E-14  |
| Unigene52148  | Potri.002G197300.1 | 1.0811  | 6.4791   | -2.5833 | Down | 6.39E-15  | 2.32E-14  |
| Unigene35586  | Potri.010G167600.1 | 10.7809 | 64.6167  | -2.5834 | Down | 1.42E-74  | 2.14E-73  |
| Unigene3274   | Potri.001G324700.2 | 1.495   | 8.9622   | -2.5837 | Down | 2.50E-34  | 1.70E-33  |
| Unigene33288  | Potri.002G194100.1 | 1.6414  | 9.8413   | -2.5839 | Down | 1.58E-59  | 1.86E-58  |
| Unigene10608  | Potri.007G043300.2 | 5.2295  | 31.3608  | -2.5842 | Down | 2.76E-71  | 3.95E-70  |
| Unigene33143  | Potri.008G169300.1 | 2.5843  | 15.4987  | -2.5843 | Down | 8.97E-27  | 4.96E-26  |

|               |                    |         |          |         |      |           |           |
|---------------|--------------------|---------|----------|---------|------|-----------|-----------|
| Unigene34504  | Potri.003G148700.2 | 2.5548  | 15.3218  | -2.5843 | Down | 5.34E-52  | 5.43E-51  |
| Unigene74171  | Potri.001G252500.1 | 20.567  | 123.3723 | -2.5846 | Down | 1.17E-100 | 2.52E-99  |
| Unigene39345  | Potri.005G178300.3 | 4.5546  | 27.3239  | -2.5848 | Down | 2.14E-81  | 3.58E-80  |
| Unigene14733  | Potri.004G216100.1 | 13.3281 | 79.9572  | -2.5848 | Down | 2.84E-118 | 7.52E-117 |
| Unigene72445  | Potri.003G134500.1 | 9.1897  | 55.1333  | -2.5848 | Down | 1.82E-44  | 1.58E-43  |
| Unigene89766  | Potri.001G450100.3 | 59.1259 | 354.8221 | -2.5852 | Down | 0         | 0         |
| Unigene89385  | Potri.007G086800.2 | 17.1747 | 103.0739 | -2.5853 | Down | 1.82E-138 | 5.87E-137 |
| Unigene15838  | Potri.017G028900.9 | 0.5948  | 3.57     | -2.5854 | Down | 2.99E-07  | 7.16E-07  |
| Unigene21862  | Potri.019G119900.1 | 1.6941  | 10.1685  | -2.5855 | Down | 1.05E-48  | 9.96E-48  |
| Unigene116515 | Potri.016G117800.1 | 0.8109  | 4.8672   | -2.5855 | Down | 2.99E-07  | 7.16E-07  |
| Unigene25850  | Potri.014G095300.7 | 0.7076  | 4.2472   | -2.5855 | Down | 2.99E-07  | 7.16E-07  |
| Unigene39986  | Potri.012G080000.4 | 2.4914  | 14.9544  | -2.5855 | Down | 5.00E-31  | 3.13E-30  |
| Unigene118747 | Potri.010G210200.3 | 1.0834  | 6.503    | -2.5855 | Down | 2.97E-13  | 1.00E-12  |
| Unigene31607  | Potri.018G085600.2 | 0.8422  | 5.0556   | -2.5856 | Down | 2.99E-07  | 7.16E-07  |
| Unigene95436  | Potri.015G009800.1 | 0.6907  | 4.1461   | -2.5856 | Down | 2.99E-07  | 7.16E-07  |
| Unigene117058 | Potri.009G069900.3 | 0.7612  | 4.5692   | -2.5856 | Down | 2.99E-07  | 7.16E-07  |
| Unigene110473 | Potri.006G143300.4 | 1.1656  | 6.9965   | -2.5856 | Down | 2.99E-07  | 7.16E-07  |
| Unigene41900  | Potri.006G076200.1 | 1.9631  | 11.7836  | -2.5856 | Down | 3.37E-19  | 1.46E-18  |
| Unigene28051  | Potri.005G186800.1 | 4.1887  | 25.1426  | -2.5856 | Down | 6.32E-37  | 4.61E-36  |
| Unigene115571 | Potri.003G092700.2 | 1.7883  | 10.7344  | -2.5856 | Down | 2.97E-13  | 1.00E-12  |
| Unigene64385  | Potri.002G215600.2 | 1.518   | 9.1118   | -2.5856 | Down | 2.97E-13  | 1.00E-12  |
| Unigene95579  | Potri.002G145100.1 | 0.7634  | 4.5825   | -2.5856 | Down | 2.97E-13  | 1.00E-12  |
| Unigene113517 | Potri.001G009700.1 | 1.0199  | 6.122    | -2.5856 | Down | 2.99E-07  | 7.16E-07  |
| Unigene54392  | Potri.007G141000.1 | 5.4423  | 32.6773  | -2.586  | Down | 1.38E-70  | 1.96E-69  |
| Unigene106722 | Potri.015G020600.1 | 2.1067  | 12.6509  | -2.5862 | Down | 6.04E-53  | 6.26E-52  |
| Unigene44461  | Potri.004G164000.1 | 6.1975  | 37.2177  | -2.5862 | Down | 1.91E-92  | 3.69E-91  |
| Unigene18869  | Potri.011G016300.1 | 1.4224  | 8.5422   | -2.5863 | Down | 4.64E-47  | 4.27E-46  |
| Unigene50698  | Potri.003G062600.1 | 1.8397  | 11.0497  | -2.5865 | Down | 2.82E-35  | 1.97E-34  |
| Unigene22647  | Potri.004G211200.3 | 1.2358  | 7.4238   | -2.5867 | Down | 2.24E-29  | 1.34E-28  |
| Unigene89636  | Potri.018G022700.6 | 9.5321  | 57.2639  | -2.5868 | Down | 4.72E-79  | 7.63E-78  |
| Unigene79197  | Potri.009G076200.3 | 18.2629 | 109.7173 | -2.5868 | Down | 6.62E-101 | 1.43E-99  |
| Unigene109443 | Potri.015G054800.1 | 3.2962  | 19.8122  | -2.5875 | Down | 1.54E-17  | 6.24E-17  |
| Unigene46160  | Potri.010G002100.1 | 5.1163  | 30.7612  | -2.5879 | Down | 1.01E-27  | 5.72E-27  |
| Unigene119534 | Potri.016G092600.1 | 1.054   | 6.3373   | -2.588  | Down | 1.01E-27  | 5.72E-27  |
| Unigene33875  | Potri.001G342600.3 | 16.0149 | 96.297   | -2.5881 | Down | 1.42E-198 | 7.34E-197 |
| Unigene22628  | Potri.019G034500.1 | 5.2198  | 31.3984  | -2.5886 | Down | 4.06E-42  | 3.35E-41  |
| Unigene95261  | Potri.009G003800.1 | 0.6367  | 3.8299   | -2.5886 | Down | 1.39E-11  | 4.32E-11  |
| Unigene39312  | Potri.006G253500.3 | 2.5075  | 15.0835  | -2.5886 | Down | 4.06E-42  | 3.35E-41  |
| Unigene118021 | Potri.005G025800.1 | 1.1162  | 6.7142   | -2.5886 | Down | 1.39E-11  | 4.32E-11  |

|               |                    |         |          |         |      |           |           |
|---------------|--------------------|---------|----------|---------|------|-----------|-----------|
| Unigene41081  | Potri.001G305500.1 | 1.565   | 9.414    | -2.5886 | Down | 1.39E-11  | 4.32E-11  |
| Unigene9721   | Potri.012G037400.1 | 1.1656  | 7.0115   | -2.5887 | Down | 1.39E-11  | 4.32E-11  |
| Unigene22085  | Potri.018G076600.3 | 18.9639 | 114.094  | -2.5889 | Down | 3.58E-281 | 2.88E-279 |
| Unigene54355  | Potri.016G020100.1 | 4.507   | 27.125   | -2.5894 | Down | 4.53E-26  | 2.45E-25  |
| Unigene86919  | Potri.015G027000.1 | 50.9841 | 306.8688 | -2.5895 | Down | 0         | 0         |
| Unigene20983  | Potri.018G038200.1 | 1.5852  | 9.544    | -2.5899 | Down | 7.07E-16  | 2.68E-15  |
| Unigene14580  | Potri.012G123700.2 | 1.7862  | 10.7538  | -2.5899 | Down | 7.07E-16  | 2.68E-15  |
| Unigene31271  | Potri.005G044000.3 | 2.3184  | 13.9583  | -2.5899 | Down | 2.52E-30  | 1.54E-29  |
| Unigene2175   | Potri.003G092400.1 | 1.0684  | 6.4323   | -2.5899 | Down | 2.52E-30  | 1.54E-29  |
| Unigene16674  | Potri.001G124000.2 | 5.4694  | 32.9403  | -2.5904 | Down | 3.43E-53  | 3.57E-52  |
| Unigene83313  | Potri.013G079000.2 | 6.8197  | 41.0849  | -2.5908 | Down | 4.59E-43  | 3.86E-42  |
| Unigene39771  | Potri.005G228100.2 | 2.2184  | 13.3681  | -2.5912 | Down | 1.52E-51  | 1.53E-50  |
| Unigene104011 | Potri.017G142700.3 | 2.0162  | 12.1524  | -2.5915 | Down | 2.96E-64  | 3.79E-63  |
| Unigene45559  | Potri.001G334900.1 | 9.8013  | 59.0752  | -2.5915 | Down | 8.98E-154 | 3.32E-152 |
| Unigene19052  | Potri.001G462800.1 | 7.3835  | 44.5055  | -2.5916 | Down | 9.36E-100 | 2.00E-98  |
| Unigene4813   | Potri.008G176000.1 | 22.592  | 136.2376 | -2.5922 | Down | 1.56E-253 | 1.09E-251 |
| Unigene30398  | Potri.001G254000.1 | 12.5011 | 75.393   | -2.5924 | Down | 2.66E-157 | 1.01E-155 |
| Unigene113852 | Potri.013G033900.2 | 0.7146  | 4.3111   | -2.5928 | Down | 1.52E-05  | 3.16E-05  |
| Unigene116081 | Potri.017G100400.1 | 0.6075  | 3.6651   | -2.5929 | Down | 1.52E-05  | 3.16E-05  |
| Unigene30526  | Potri.016G088800.4 | 0.9142  | 5.5156   | -2.5929 | Down | 1.52E-05  | 3.16E-05  |
| Unigene16158  | Potri.015G035800.1 | 2.2652  | 13.6662  | -2.5929 | Down | 3.27E-14  | 1.15E-13  |
| Unigene23494  | Potri.015G006800.1 | 8.1193  | 48.9857  | -2.5929 | Down | 2.44E-141 | 8.06E-140 |
| Unigene97813  | Potri.010G132200.4 | 1.743   | 10.5158  | -2.5929 | Down | 6.60E-10  | 1.87E-09  |
| Unigene117446 | Potri.009G154100.1 | 0.5152  | 3.1082   | -2.5929 | Down | 1.52E-05  | 3.16E-05  |
| Unigene116678 | Potri.005G064800.5 | 0.5686  | 3.4304   | -2.5929 | Down | 1.52E-05  | 3.16E-05  |
| Unigene27632  | Potri.002G190200.3 | 1.8284  | 11.0312  | -2.5929 | Down | 9.23E-23  | 4.50E-22  |
| Unigene65495  | Potri.001G454500.1 | 2.914   | 17.581   | -2.5929 | Down | 9.23E-23  | 4.50E-22  |
| Unigene49206  | Potri.001G379000.1 | 4.3456  | 26.2179  | -2.5929 | Down | 1.72E-52  | 1.76E-51  |
| Unigene101135 | Potri.001G255800.1 | 0.8688  | 5.2415   | -2.5929 | Down | 3.27E-14  | 1.15E-13  |
| Unigene7746   | Potri.001G100200.1 | 0.6567  | 3.9619   | -2.5929 | Down | 1.52E-05  | 3.16E-05  |
| Unigene47637  | Potri.001G016300.1 | 0.7445  | 4.4918   | -2.5929 | Down | 6.60E-10  | 1.87E-09  |
| Unigene25267  | Potri.T092400.1    | 1.6726  | 10.0914  | -2.593  | Down | 6.60E-10  | 1.87E-09  |
| Unigene110431 | Potri.018G151300.2 | 0.8363  | 5.0457   | -2.593  | Down | 1.52E-05  | 3.16E-05  |
| Unigene24876  | Potri.017G023300.1 | 1.6954  | 10.229   | -2.593  | Down | 3.27E-14  | 1.15E-13  |
| Unigene107425 | Potri.014G127400.1 | 0.9278  | 5.5979   | -2.593  | Down | 1.52E-05  | 3.16E-05  |
| Unigene117161 | Potri.010G094300.1 | 1.6077  | 9.6999   | -2.593  | Down | 3.27E-14  | 1.15E-13  |
| Unigene25251  | Potri.009G076000.3 | 0.7581  | 4.5739   | -2.593  | Down | 1.52E-05  | 3.16E-05  |
| Unigene116116 | Potri.009G009800.1 | 0.6055  | 3.6532   | -2.593  | Down | 1.52E-05  | 3.16E-05  |
| Unigene112121 | Potri.008G198800.1 | 0.7803  | 4.7079   | -2.593  | Down | 1.52E-05  | 3.16E-05  |

|               |                    |         |          |         |      |           |           |
|---------------|--------------------|---------|----------|---------|------|-----------|-----------|
| Unigene18586  | Potri.008G162500.4 | 1.1057  | 6.6711   | -2.593  | Down | 5.08E-27  | 2.83E-26  |
| Unigene96702  | Potri.006G021200.1 | 0.7011  | 4.23     | -2.593  | Down | 1.52E-05  | 3.16E-05  |
| Unigene94594  | Potri.003G151400.1 | 0.8955  | 5.4031   | -2.593  | Down | 1.71E-18  | 7.20E-18  |
| Unigene113427 | Potri.002G043700.1 | 0.7342  | 4.4299   | -2.593  | Down | 1.52E-05  | 3.16E-05  |
| Unigene19512  | Potri.001G310900.1 | 2.2268  | 13.4351  | -2.593  | Down | 1.71E-18  | 7.20E-18  |
| Unigene13     | Potri.011G169100.1 | 3.3042  | 19.9373  | -2.5931 | Down | 8.84E-254 | 6.22E-252 |
| Unigene8147   | Potri.012G103300.1 | 6.6574  | 40.1852  | -2.5936 | Down | 1.48E-63  | 1.87E-62  |
| Unigene19767  | Potri.005G191700.2 | 8.3672  | 50.503   | -2.5936 | Down | 5.03E-72  | 7.29E-71  |
| Unigene40079  | Potri.004G041300.1 | 1.6217  | 9.7915   | -2.594  | Down | 2.30E-42  | 1.91E-41  |
| Unigene925    | Potri.015G056700.1 | 6.4413  | 38.8941  | -2.5941 | Down | 1.87E-147 | 6.57E-146 |
| Unigene28810  | Potri.006G239900.1 | 3.689   | 22.276   | -2.5942 | Down | 2.21E-70  | 3.13E-69  |
| Unigene76140  | Potri.001G131600.1 | 20.648  | 124.6818 | -2.5942 | Down | 8.10E-107 | 1.88E-105 |
| Unigene49271  | Potri.005G073500.2 | 2.6245  | 15.8513  | -2.5945 | Down | 1.27E-29  | 7.63E-29  |
| Unigene19482  | Potri.019G018000.1 | 10.6472 | 64.3111  | -2.5946 | Down | 3.93E-133 | 1.21E-131 |
| Unigene43131  | Potri.006G030300.1 | 15.2589 | 92.1731  | -2.5947 | Down | 0         | 0         |
| Unigene48964  | Potri.009G159800.1 | 2.8692  | 17.3326  | -2.5948 | Down | 2.29E-25  | 1.21E-24  |
| Unigene54178  | Potri.006G150900.1 | 4.4632  | 26.9619  | -2.5948 | Down | 2.29E-25  | 1.21E-24  |
| Unigene74758  | Potri.002G016300.1 | 15.8136 | 95.5556  | -2.5952 | Down | 8.59E-80  | 1.41E-78  |
| Unigene107    | Potri.013G087200.1 | 5.2724  | 31.8611  | -2.5953 | Down | 0         | 0         |
| Unigene48012  | Potri.005G098500.2 | 7.6464  | 46.213   | -2.5954 | Down | 1.80E-36  | 1.30E-35  |
| Unigene104337 | Potri.009G160400.1 | 1.1061  | 6.6865   | -2.5958 | Down | 7.83E-17  | 3.09E-16  |
| Unigene3841   | Potri.009G105200.1 | 1.6537  | 9.9968   | -2.5958 | Down | 7.83E-17  | 3.09E-16  |
| Unigene42312  | Potri.005G178200.1 | 6.5608  | 39.6616  | -2.5958 | Down | 1.49E-47  | 1.38E-46  |
| Unigene38292  | Potri.002G260300.2 | 1.4105  | 8.5267   | -2.5958 | Down | 7.83E-17  | 3.09E-16  |
| Unigene18542  | Potri.003G018800.1 | 4.6327  | 28.007   | -2.5959 | Down | 2.76E-150 | 9.92E-149 |
| Unigene115693 | Potri.006G062800.1 | 1.6382  | 9.9105   | -2.5968 | Down | 1.52E-12  | 4.97E-12  |
| Unigene97231  | Potri.015G089700.1 | 0.7369  | 4.4582   | -2.5969 | Down | 1.52E-12  | 4.97E-12  |
| Unigene40277  | Potri.006G143400.2 | 1.7014  | 10.2931  | -2.5969 | Down | 1.52E-12  | 4.97E-12  |
| Unigene119319 | Potri.015G092100.4 | 0.712   | 4.3077   | -2.597  | Down | 1.52E-12  | 4.97E-12  |
| Unigene21385  | Potri.001G213700.1 | 3.1296  | 18.9369  | -2.5971 | Down | 6.59E-137 | 2.09E-135 |
| Unigene4454   | Potri.003G032300.3 | 7.6554  | 46.327   | -2.5973 | Down | 1.15E-41  | 9.42E-41  |
| Unigene37270  | Potri.011G118200.3 | 15.9313 | 96.4445  | -2.5978 | Down | 5.93E-109 | 1.41E-107 |
| Unigene46721  | Potri.008G072600.2 | 6.1774  | 37.4001  | -2.598  | Down | 2.74E-158 | 1.06E-156 |
| Unigene21761  | Potri.T100600.1    | 2.3697  | 14.3482  | -2.5981 | Down | 2.93E-44  | 2.53E-43  |
| Unigene87248  | Potri.011G044400.1 | 3.4559  | 20.9271  | -2.5982 | Down | 2.56E-26  | 1.40E-25  |
| Unigene11882  | Potri.008G038400.1 | 2.7843  | 16.8602  | -2.5982 | Down | 4.30E-51  | 4.29E-50  |
| Unigene23066  | Potri.013G124000.1 | 4.8594  | 29.4314  | -2.5985 | Down | 9.49E-65  | 1.23E-63  |
| Unigene56428  | Potri.013G003400.3 | 6.3361  | 38.382   | -2.5988 | Down | 7.47E-47  | 6.83E-46  |
| Unigene27347  | Potri.013G106900.2 | 0.8153  | 4.9408   | -2.5993 | Down | 3.19E-08  | 8.19E-08  |

|               |                    |         |          |         |      |           |           |
|---------------|--------------------|---------|----------|---------|------|-----------|-----------|
| Unigene29127  | Potri.010G237700.1 | 3.5471  | 21.4958  | -2.5993 | Down | 2.81E-56  | 3.12E-55  |
| Unigene117064 | Potri.009G077900.2 | 0.87    | 5.2721   | -2.5993 | Down | 3.19E-08  | 8.19E-08  |
| Unigene26794  | Potri.006G082300.1 | 0.921   | 5.5813   | -2.5993 | Down | 3.19E-08  | 8.19E-08  |
| Unigene58948  | Potri.003G221200.3 | 2.8419  | 17.2222  | -2.5993 | Down | 3.61E-15  | 1.32E-14  |
| Unigene119087 | Potri.002G147000.1 | 0.5217  | 3.1614   | -2.5993 | Down | 3.19E-08  | 8.19E-08  |
| Unigene3488   | Potri.001G246800.1 | 1.3944  | 8.4502   | -2.5993 | Down | 3.19E-08  | 8.19E-08  |
| Unigene96158  | Potri.001G213500.1 | 1.1702  | 7.0915   | -2.5993 | Down | 3.19E-08  | 8.19E-08  |
| Unigene8037   | Potri.015G083200.1 | 1.4142  | 8.5703   | -2.5994 | Down | 3.61E-15  | 1.32E-14  |
| Unigene119016 | Potri.010G253700.2 | 0.5435  | 3.2939   | -2.5994 | Down | 3.19E-08  | 8.19E-08  |
| Unigene2834   | Potri.010G004200.2 | 1.9269  | 11.6774  | -2.5994 | Down | 1.91E-49  | 1.84E-48  |
| Unigene42561  | Potri.009G145200.2 | 2.9502  | 17.879   | -2.5994 | Down | 3.29E-97  | 6.78E-96  |
| Unigene42920  | Potri.009G013600.2 | 10.0772 | 61.0694  | -2.5994 | Down | 4.67E-247 | 3.17E-245 |
| Unigene105228 | Potri.005G140700.3 | 0.8175  | 4.9543   | -2.5994 | Down | 3.19E-08  | 8.19E-08  |
| Unigene27348  | Potri.005G027800.3 | 1.3751  | 8.3333   | -2.5994 | Down | 3.61E-15  | 1.32E-14  |
| Unigene29074  | Potri.001G361500.1 | 2.4064  | 14.5833  | -2.5994 | Down | 3.29E-97  | 6.78E-96  |
| Unigene30067  | Potri.001G076700.3 | 6.9529  | 42.1359  | -2.5994 | Down | 1.43E-83  | 2.45E-82  |
| Unigene45103  | Potri.001G113900.1 | 4.8259  | 29.2521  | -2.5997 | Down | 5.59E-93  | 1.09E-91  |
| Unigene51549  | Potri.005G247100.1 | 2.0257  | 12.2796  | -2.5998 | Down | 1.08E-65  | 1.41E-64  |
| Unigene21531  | Potri.008G111200.1 | 7.7295  | 46.8666  | -2.6001 | Down | 4.15E-75  | 6.33E-74  |
| Unigene33     | Potri.004G226700.1 | 21.9132 | 132.8682 | -2.6001 | Down | 0         | 0         |
| Unigene1755   | Potri.019G103000.1 | 10.6178 | 64.3949  | -2.6005 | Down | 1.21E-199 | 6.31E-198 |
| Unigene46797  | Potri.002G118900.1 | 20.0573 | 121.6929 | -2.601  | Down | 4.24E-99  | 9.00E-98  |
| Unigene96909  | Potri.017G101200.1 | 1.4642  | 8.8839   | -2.6011 | Down | 8.69E-18  | 3.56E-17  |
| Unigene41700  | Potri.010G137100.1 | 3.1462  | 19.0891  | -2.6011 | Down | 1.22E-66  | 1.63E-65  |
| Unigene3977   | Potri.004G073700.1 | 3.1403  | 19.0569  | -2.6013 | Down | 1.47E-43  | 1.25E-42  |
| Unigene33425  | Potri.004G235000.1 | 1.1942  | 7.2479   | -2.6015 | Down | 2.87E-27  | 1.61E-26  |
| Unigene24242  | Potri.015G101200.1 | 2.2928  | 13.9172  | -2.6017 | Down | 1.02E-36  | 7.39E-36  |
| Unigene44386  | Potri.003G107900.1 | 2.3171  | 14.0648  | -2.6017 | Down | 1.02E-36  | 7.39E-36  |
| Unigene118859 | Potri.015G020800.4 | 0.8077  | 4.9045   | -2.6022 | Down | 7.18E-11  | 2.15E-10  |
| Unigene15728  | Potri.001G186600.2 | 0.705   | 4.2809   | -2.6022 | Down | 7.18E-11  | 2.15E-10  |
| Unigene106159 | Potri.001G034600.1 | 0.6771  | 4.1114   | -2.6022 | Down | 7.18E-11  | 2.15E-10  |
| Unigene104100 | Potri.010G024400.1 | 1.2547  | 7.6192   | -2.6023 | Down | 7.18E-11  | 2.15E-10  |
| Unigene52472  | Potri.008G211200.1 | 1.9584  | 11.8925  | -2.6023 | Down | 2.12E-20  | 9.57E-20  |
| Unigene3874   | Potri.005G211400.2 | 3.0392  | 18.4554  | -2.6023 | Down | 2.12E-20  | 9.57E-20  |
| Unigene76897  | Potri.012G039200.1 | 34.682  | 210.6198 | -2.6024 | Down | 5.47E-183 | 2.55E-181 |
| Unigene13427  | Potri.001G351400.1 | 4.77    | 28.9797  | -2.603  | Down | 1.45E-115 | 3.73E-114 |
| Unigene78525  | Potri.013G155100.3 | 62.9528 | 382.5225 | -2.6032 | Down | 0         | 0         |
| Unigene11060  | Potri.017G101500.1 | 1.0922  | 6.6383   | -2.6036 | Down | 4.23E-47  | 3.89E-46  |
| Unigene22541  | Potri.012G077200.1 | 6.7907  | 41.2808  | -2.6038 | Down | 5.21E-179 | 2.35E-177 |



|               |                    |         |          |         |      |           |           |
|---------------|--------------------|---------|----------|---------|------|-----------|-----------|
| Unigene9572   | Potri.010G142900.1 | 2.5851  | 15.716   | -2.6039 | Down | 1.29E-25  | 6.89E-25  |
| Unigene41502  | Potri.001G239600.1 | 0.9617  | 5.8465   | -2.6039 | Down | 1.67E-13  | 5.71E-13  |
| Unigene34677  | Potri.014G083900.1 | 1.1814  | 7.1824   | -2.604  | Down | 1.29E-25  | 6.89E-25  |
| Unigene24751  | Potri.001G301800.1 | 0.7713  | 4.6893   | -2.604  | Down | 1.67E-13  | 5.71E-13  |
| Unigene10756  | Potri.006G279100.1 | 13.4385 | 81.722   | -2.6044 | Down | 0         | 0         |
| Unigene3664   | Potri.006G176700.1 | 1.0516  | 6.3976   | -2.6049 | Down | 3.99E-16  | 1.53E-15  |
| Unigene7478   | Potri.002G260100.2 | 16.8752 | 102.6635 | -2.6049 | Down | 8.92E-218 | 5.12E-216 |
| Unigene51524  | Potri.018G036400.1 | 3.1159  | 18.9571  | -2.605  | Down | 8.07E-31  | 5.01E-30  |
| Unigene17385  | Potri.008G151900.1 | 4.9154  | 29.9053  | -2.605  | Down | 1.88E-45  | 1.66E-44  |
| Unigene68690  | Potri.001G053100.1 | 1.0395  | 6.3242   | -2.605  | Down | 3.99E-16  | 1.53E-15  |
| Unigene48729  | Potri.001G034700.1 | 2.4019  | 14.6128  | -2.605  | Down | 3.99E-16  | 1.53E-15  |
| Unigene94236  | Potri.010G152400.1 | 0.7799  | 4.7451   | -2.6051 | Down | 3.99E-16  | 1.53E-15  |
| Unigene105658 | Potri.008G096500.1 | 0.9058  | 5.5111   | -2.6051 | Down | 3.99E-16  | 1.53E-15  |
| Unigene15607  | Potri.008G221500.1 | 5.1114  | 31.1063  | -2.6054 | Down | 2.03E-33  | 1.35E-32  |
| Unigene33590  | Potri.001G358500.2 | 2.5323  | 15.4105  | -2.6054 | Down | 2.03E-33  | 1.35E-32  |
| Unigene2362   | Potri.011G167000.9 | 0.9372  | 5.7047   | -2.6057 | Down | 9.66E-19  | 4.11E-18  |
| Unigene34305  | Potri.008G123200.5 | 2.7547  | 16.7673  | -2.6057 | Down | 2.42E-119 | 6.48E-118 |
| Unigene40757  | Potri.006G243600.2 | 26.4645 | 161.154  | -2.6063 | Down | 1.08E-238 | 6.96E-237 |
| Unigene46171  | Potri.001G472600.8 | 2.493   | 15.1857  | -2.6068 | Down | 5.83E-24  | 2.96E-23  |
| Unigene69146  | Potri.001G327100.1 | 6.1056  | 37.1952  | -2.6069 | Down | 5.40E-49  | 5.16E-48  |
| Unigene30061  | Potri.010G081200.1 | 2.3662  | 14.4237  | -2.6078 | Down | 2.28E-34  | 1.56E-33  |
| Unigene46906  | Potri.009G111400.4 | 13.7155 | 83.6141  | -2.6079 | Down | 2.58E-72  | 3.76E-71  |
| Unigene1730   | Potri.010G075900.1 | 4.0523  | 24.7065  | -2.6081 | Down | 1.46E-39  | 1.13E-38  |
| Unigene37112  | Potri.017G012100.1 | 21.3893 | 130.4316 | -2.6083 | Down | 1.81E-176 | 8.02E-175 |
| Unigene7059   | Potri.008G026700.1 | 8.2662  | 50.407   | -2.6083 | Down | 1.81E-176 | 8.02E-175 |
| Unigene11999  | Potri.016G136700.1 | 1.9156  | 11.6817  | -2.6084 | Down | 2.39E-47  | 2.21E-46  |
| Unigene40022  | Potri.014G029600.1 | 3.9263  | 23.9474  | -2.6086 | Down | 3.99E-55  | 4.32E-54  |
| Unigene42536  | Potri.013G068200.1 | 5.0833  | 31.0096  | -2.6089 | Down | 4.34E-198 | 2.23E-196 |
| Unigene77707  | Potri.019G079300.1 | 16.2382 | 99.0773  | -2.6092 | Down | 8.60E-89  | 1.59E-87  |
| Unigene12319  | Potri.006G066800.1 | 8.2321  | 50.2315  | -2.6093 | Down | 3.84E-99  | 8.15E-98  |
| Unigene81808  | Potri.003G018500.1 | 20.3188 | 123.9956 | -2.6094 | Down | 2.01E-122 | 5.55E-121 |
| Unigene104838 | Potri.013G021700.1 | 1.0747  | 6.5608   | -2.6099 | Down | 2.64E-22  | 1.26E-21  |
| Unigene6251   | Potri.006G080700.3 | 0.7691  | 4.6952   | -2.6099 | Down | 1.59E-06  | 3.60E-06  |
| Unigene97892  | Potri.004G075700.1 | 0.6661  | 4.0664   | -2.6099 | Down | 1.59E-06  | 3.60E-06  |
| Unigene91444  | Potri.018G138100.1 | 30.3003 | 184.9856 | -2.61   | Down | 1.59E-296 | 1.39E-294 |
| Unigene27429  | Potri.018G026700.1 | 1.0657  | 6.5062   | -2.61   | Down | 1.59E-06  | 3.60E-06  |
| Unigene97554  | Potri.015G027000.3 | 0.9006  | 5.4982   | -2.61   | Down | 7.84E-12  | 2.47E-11  |
| Unigene5769   | Potri.013G105500.2 | 1.9376  | 11.8294  | -2.61   | Down | 7.84E-12  | 2.47E-11  |
| Unigene1118   | Potri.012G092400.1 | 2.2964  | 14.0198  | -2.61   | Down | 4.06E-30  | 2.47E-29  |

|               |                    |         |         |         |      |           |           |
|---------------|--------------------|---------|---------|---------|------|-----------|-----------|
| Unigene56089  | Potri.011G152400.1 | 0.9172  | 5.5996  | -2.61   | Down | 3.43E-09  | 9.34E-09  |
| Unigene40895  | Potri.011G020900.1 | 1.492   | 9.1086  | -2.61   | Down | 3.43E-09  | 9.34E-09  |
| Unigene68767  | Potri.010G205400.2 | 1.9015  | 11.6091 | -2.61   | Down | 2.57E-35  | 1.79E-34  |
| Unigene117676 | Potri.010G164100.3 | 0.8928  | 5.4507  | -2.61   | Down | 3.43E-09  | 9.34E-09  |
| Unigene118589 | Potri.010G138100.2 | 1.4659  | 8.9495  | -2.61   | Down | 4.42E-17  | 1.76E-16  |
| Unigene110952 | Potri.010G130800.2 | 0.9816  | 5.9925  | -2.61   | Down | 1.59E-06  | 3.60E-06  |
| Unigene106442 | Potri.010G075000.1 | 0.7109  | 4.3402  | -2.61   | Down | 1.84E-14  | 6.56E-14  |
| Unigene104667 | Potri.009G006800.1 | 1.1134  | 6.7975  | -2.61   | Down | 1.02E-32  | 6.68E-32  |
| Unigene49714  | Potri.008G080100.2 | 8.3022  | 50.6852 | -2.61   | Down | 2.96E-61  | 3.60E-60  |
| Unigene40250  | Potri.008G030000.1 | 1.5352  | 9.3725  | -2.61   | Down | 6.53E-25  | 3.41E-24  |
| Unigene95276  | Potri.007G070700.1 | 1.0794  | 6.5899  | -2.61   | Down | 3.43E-09  | 9.34E-09  |
| Unigene117296 | Potri.006G280800.1 | 0.6322  | 3.8596  | -2.61   | Down | 1.59E-06  | 3.60E-06  |
| Unigene119066 | Potri.005G222500.1 | 0.5931  | 3.6209  | -2.61   | Down | 3.43E-09  | 9.34E-09  |
| Unigene42334  | Potri.005G216200.2 | 0.7082  | 4.3237  | -2.61   | Down | 1.59E-06  | 3.60E-06  |
| Unigene4117   | Potri.005G010700.2 | 1.0313  | 6.2963  | -2.61   | Down | 1.59E-06  | 3.60E-06  |
| Unigene53419  | Potri.004G049400.1 | 1.6139  | 9.8531  | -2.61   | Down | 3.43E-09  | 9.34E-09  |
| Unigene52387  | Potri.003G148900.1 | 1.0691  | 6.5269  | -2.61   | Down | 3.43E-09  | 9.34E-09  |
| Unigene117015 | Potri.002G064900.1 | 3.6096  | 22.037  | -2.61   | Down | 4.06E-30  | 2.47E-29  |
| Unigene114288 | Potri.001G380500.1 | 4.191   | 25.5861 | -2.61   | Down | 1.62E-27  | 9.17E-27  |
| Unigene40594  | Potri.001G343900.1 | 0.6893  | 4.2083  | -2.61   | Down | 3.43E-09  | 9.34E-09  |
| Unigene37816  | Potri.001G315600.2 | 1.0822  | 6.6069  | -2.61   | Down | 1.84E-14  | 6.56E-14  |
| Unigene104943 | Potri.001G132600.1 | 0.6065  | 3.7027  | -2.61   | Down | 1.59E-06  | 3.60E-06  |
| Unigene94890  | Potri.019G039300.5 | 0.5936  | 3.6241  | -2.6101 | Down | 1.59E-06  | 3.60E-06  |
| Unigene117441 | Potri.016G122800.1 | 0.6182  | 3.7743  | -2.6101 | Down | 1.59E-06  | 3.60E-06  |
| Unigene104808 | Potri.011G006700.3 | 0.7443  | 4.5442  | -2.6101 | Down | 4.42E-17  | 1.76E-16  |
| Unigene10323  | Potri.010G204800.1 | 1.2911  | 7.8825  | -2.6101 | Down | 3.43E-09  | 9.34E-09  |
| Unigene105321 | Potri.008G122200.6 | 0.7699  | 4.7006  | -2.6101 | Down | 3.43E-09  | 9.34E-09  |
| Unigene106279 | Potri.006G004300.1 | 1.3971  | 8.5297  | -2.6101 | Down | 4.06E-30  | 2.47E-29  |
| Unigene94947  | Potri.004G203300.1 | 0.7629  | 4.6578  | -2.6101 | Down | 3.43E-09  | 9.34E-09  |
| Unigene46138  | Potri.004G159000.1 | 0.6907  | 4.217   | -2.6101 | Down | 1.59E-06  | 3.60E-06  |
| Unigene11225  | Potri.003G030900.1 | 33.6553 | 205.479 | -2.6101 | Down | 0         | 0         |
| Unigene17446  | Potri.001G037900.4 | 1.5541  | 9.4882  | -2.6101 | Down | 1.07E-19  | 4.73E-19  |
| Unigene36921  | Potri.008G217300.3 | 10.282  | 62.8115 | -2.6109 | Down | 6.44E-83  | 1.10E-81  |
| Unigene25435  | Potri.004G120500.1 | 2.3403  | 14.2962 | -2.6109 | Down | 1.66E-85  | 2.94E-84  |
| Unigene34682  | Potri.009G151300.2 | 5.2006  | 31.7809 | -2.6114 | Down | 3.15E-157 | 1.20E-155 |
| Unigene1481   | Potri.006G252100.1 | 1.9631  | 11.9966 | -2.6114 | Down | 1.99E-54  | 2.13E-53  |
| Unigene44888  | Potri.008G016000.2 | 2.5902  | 15.8305 | -2.6116 | Down | 8.40E-97  | 1.72E-95  |
| Unigene2518   | Potri.016G025100.2 | 2.9069  | 17.7685 | -2.6118 | Down | 7.31E-84  | 1.26E-82  |
| Unigene10821  | Potri.001G326700.1 | 2.1574  | 13.1897 | -2.612  | Down | 1.66E-73  | 2.46E-72  |

|               |                    |          |          |         |      |           |           |
|---------------|--------------------|----------|----------|---------|------|-----------|-----------|
| Unigene14816  | Potri.018G067200.2 | 7.5621   | 46.2405  | -2.6123 | Down | 9.74E-66  | 1.28E-64  |
| Unigene41573  | Potri.005G236600.1 | 3.4      | 20.7929  | -2.6125 | Down | 4.56E-31  | 2.85E-30  |
| Unigene24282  | Potri.011G091200.1 | 6.021    | 36.8319  | -2.6129 | Down | 7.25E-104 | 1.62E-102 |
| Unigene38169  | Potri.011G057200.1 | 2.0465   | 12.5215  | -2.6132 | Down | 1.35E-47  | 1.26E-46  |
| Unigene34798  | Potri.009G151600.1 | 3.2      | 19.5809  | -2.6133 | Down | 1.43E-112 | 3.55E-111 |
| Unigene29769  | Potri.004G084100.2 | 2.9697   | 18.1729  | -2.6134 | Down | 5.31E-45  | 4.66E-44  |
| Unigene45621  | Potri.010G040100.5 | 2.4955   | 15.2757  | -2.6138 | Down | 4.20E-116 | 1.09E-114 |
| Unigene11329  | Potri.018G137800.1 | 2.3682   | 14.4968  | -2.6139 | Down | 8.24E-40  | 6.43E-39  |
| Unigene98865  | Potri.007G036600.2 | 1.3815   | 8.46     | -2.6144 | Down | 4.91E-18  | 2.03E-17  |
| Unigene27942  | Potri.017G142700.3 | 4.6421   | 28.428   | -2.6145 | Down | 3.90E-51  | 3.90E-50  |
| Unigene119270 | Potri.006G141800.1 | 1.0853   | 6.6463   | -2.6145 | Down | 4.91E-18  | 2.03E-17  |
| Unigene57945  | Potri.001G036800.2 | 3.1358   | 19.2035  | -2.6145 | Down | 4.91E-18  | 2.03E-17  |
| Unigene117493 | Potri.001G025100.4 | 49.869   | 305.5177 | -2.615  | Down | 0         | 0         |
| Unigene969    | Potri.010G103000.1 | 4.6775   | 28.6574  | -2.6151 | Down | 8.49E-204 | 4.51E-202 |
| Unigene19328  | Potri.014G027800.1 | 0.9832   | 6.0245   | -2.6153 | Down | 2.04E-15  | 7.55E-15  |
| Unigene41301  | Potri.013G016500.2 | 1.9128   | 11.7207  | -2.6153 | Down | 2.04E-29  | 1.22E-28  |
| Unigene33434  | Potri.009G110400.1 | 3.2329   | 19.8096  | -2.6153 | Down | 3.64E-71  | 5.21E-70  |
| Unigene8559   | Potri.016G017000.1 | 12.0376  | 73.7947  | -2.616  | Down | 2.15E-63  | 2.71E-62  |
| Unigene42369  | Potri.015G037000.1 | 13.6804  | 83.8696  | -2.616  | Down | 0         | 0         |
| Unigene54285  | Potri.010G212700.2 | 101.5783 | 622.8269 | -2.6162 | Down | 0         | 0         |
| Unigene100153 | Potri.017G112600.4 | 0.9452   | 5.7967   | -2.6165 | Down | 8.59E-13  | 2.83E-12  |
| Unigene105349 | Potri.016G128500.1 | 0.8753   | 5.3677   | -2.6165 | Down | 8.59E-13  | 2.83E-12  |
| Unigene22171  | Potri.009G077900.4 | 9.6022   | 58.896   | -2.6167 | Down | 2.34E-242 | 1.55E-240 |
| Unigene106316 | Potri.001G255800.1 | 1.9293   | 11.8362  | -2.6171 | Down | 5.76E-33  | 3.80E-32  |
| Unigene6574   | Potri.008G107100.1 | 13.1383  | 80.6103  | -2.6172 | Down | 2.32E-104 | 5.22E-103 |
| Unigene31398  | Potri.015G108900.2 | 2.3963   | 14.7046  | -2.6174 | Down | 1.33E-21  | 6.27E-21  |
| Unigene385    | Potri.017G073900.2 | 6.7698   | 41.5498  | -2.6177 | Down | 1.37E-136 | 4.35E-135 |
| Unigene117038 | Potri.006G160300.1 | 10.7972  | 66.2703  | -2.6177 | Down | 6.85E-88  | 1.25E-86  |
| Unigene538    | Potri.004G028000.1 | 2.1353   | 13.1066  | -2.6178 | Down | 1.34E-96  | 2.74E-95  |
| Unigene12047  | Potri.008G056500.1 | 6.3021   | 38.6852  | -2.6179 | Down | 2.10E-151 | 7.61E-150 |
| Unigene80961  | Potri.010G177900.1 | 26.6001  | 163.3024 | -2.618  | Down | 1.61E-157 | 6.15E-156 |
| Unigene1798   | Potri.005G125600.1 | 2.3925   | 14.689   | -2.6181 | Down | 5.30E-74  | 7.92E-73  |
| Unigene31813  | Potri.002G055000.1 | 5.7505   | 35.3102  | -2.6183 | Down | 4.76E-161 | 1.87E-159 |
| Unigene4595   | Potri.011G058500.1 | 1.5607   | 9.5839   | -2.6184 | Down | 3.72E-10  | 1.07E-09  |
| Unigene48431  | Potri.007G034200.2 | 1.498    | 9.199    | -2.6184 | Down | 3.72E-10  | 1.07E-09  |
| Unigene13056  | Potri.006G114300.4 | 2.6194   | 16.0854  | -2.6184 | Down | 3.00E-45  | 2.65E-44  |
| Unigene106282 | Potri.006G095000.2 | 0.6301   | 3.8692   | -2.6184 | Down | 3.72E-10  | 1.07E-09  |
| Unigene118883 | Potri.002G095100.3 | 0.7257   | 4.4563   | -2.6184 | Down | 3.72E-10  | 1.07E-09  |
| Unigene27189  | Potri.014G035700.1 | 8.0042   | 49.1536  | -2.6185 | Down | 3.00E-45  | 2.65E-44  |

|               |                     |         |          |         |      |           |           |
|---------------|---------------------|---------|----------|---------|------|-----------|-----------|
| Unigene94886  | Potri.006G257900.2  | 2.0438  | 12.551   | -2.6185 | Down | 5.45E-19  | 2.34E-18  |
| Unigene73974  | Potri.006G004700.2  | 14.0092 | 86.0303  | -2.6185 | Down | 2.06E-71  | 2.96E-70  |
| Unigene18924  | Potri.005G247100.1  | 2.0722  | 12.7253  | -2.6185 | Down | 1.63E-36  | 1.18E-35  |
| Unigene62527  | Potri.002G176300.1  | 3.161   | 19.4115  | -2.6185 | Down | 5.45E-19  | 2.34E-18  |
| Unigene3780   | Potri.001G377800.2  | 4.5303  | 27.8205  | -2.6185 | Down | 9.17E-28  | 5.22E-27  |
| Unigene103954 | Potri.001G358300.2  | 0.6819  | 4.1875   | -2.6185 | Down | 3.72E-10  | 1.07E-09  |
| Unigene107660 | Potri.001G229700.1  | 1.8465  | 11.3394  | -2.6185 | Down | 3.72E-10  | 1.07E-09  |
| Unigene32901  | Potri.018G104500.1  | 7.2123  | 44.3023  | -2.6189 | Down | 1.74E-118 | 4.60E-117 |
| Unigene35938  | Potri.016G121600.1  | 34.1617 | 209.8561 | -2.6189 | Down | 0         | 0         |
| Unigene58919  | Potri.013G016900.5  | 7.1585  | 43.9737  | -2.6189 | Down | 2.20E-51  | 2.22E-50  |
| Unigene3442   | Potri.007G041100.6  | 3.3392  | 20.5136  | -2.619  | Down | 1.18E-42  | 9.85E-42  |
| Unigene85422  | Potri.005G071900.4  | 33.4276 | 205.3756 | -2.6192 | Down | 2.39E-227 | 1.45E-225 |
| Unigene23880  | Potri.006G090600.3  | 9.9924  | 61.411   | -2.6196 | Down | 5.19E-217 | 2.96E-215 |
| Unigene71934  | Potri.015G101900.1  | 11.0989 | 68.2168  | -2.6197 | Down | 6.37E-55  | 6.86E-54  |
| Unigene17859  | Potri.016G056800.1  | 0.7966  | 4.8969   | -2.6199 | Down | 2.25E-16  | 8.70E-16  |
| Unigene12768  | Potri.018G039500.1  | 0.9311  | 5.7239   | -2.62   | Down | 2.25E-16  | 8.70E-16  |
| Unigene22236  | Potri.005G244400.1  | 20.6098 | 126.7026 | -2.62   | Down | 0         | 0         |
| Unigene33448  | Potri.002G040600.4  | 6.408   | 39.4036  | -2.6204 | Down | 2.93E-94  | 5.81E-93  |
| Unigene1003   | Potri.018G029800.4  | 3.1543  | 19.398   | -2.6205 | Down | 2.55E-121 | 6.96E-120 |
| Unigene14600  | Potri.016G024200.1  | 4.2832  | 26.3415  | -2.6206 | Down | 1.49E-22  | 7.20E-22  |
| Unigene87651  | Potri.002G228300.1  | 60.6848 | 373.2563 | -2.6208 | Down | 0         | 0         |
| Unigene27954  | Potri.002G229900.1  | 2.9725  | 18.2848  | -2.6209 | Down | 1.03E-28  | 6.02E-28  |
| Unigene73827  | Potri.004G087300.1  | 6.6544  | 40.9399  | -2.6211 | Down | 7.28E-35  | 5.02E-34  |
| Unigene44702  | Potri.010G051900.3  | 9.3093  | 57.2824  | -2.6213 | Down | 6.51E-132 | 1.98E-130 |
| Unigene97347  | Potri.016G022700.2  | 1.4386  | 8.8562   | -2.622  | Down | 9.43E-14  | 3.25E-13  |
| Unigene35465  | Potri.004G002000.1  | 1.3815  | 8.5048   | -2.622  | Down | 9.43E-14  | 3.25E-13  |
| Unigene105976 | Potri.001G094100.3  | 0.9259  | 5.7      | -2.622  | Down | 9.43E-14  | 3.25E-13  |
| Unigene94582  | Potri.T077100.1     | 0.9161  | 5.64     | -2.6221 | Down | 1.68E-07  | 4.09E-07  |
| Unigene114625 | Potri.T035900.2     | 0.9564  | 5.8879   | -2.6221 | Down | 1.68E-07  | 4.09E-07  |
| Unigene14949  | Potri.016G099400.2  | 0.7293  | 4.49     | -2.6221 | Down | 1.68E-07  | 4.09E-07  |
| Unigene44285  | Potri.015G006100.1  | 2.7369  | 16.8491  | -2.6221 | Down | 2.89E-32  | 1.87E-31  |
| Unigene54001  | Potri.010G112800.1  | 2.4632  | 15.1642  | -2.6221 | Down | 9.43E-14  | 3.25E-13  |
| Unigene41642  | Potri.010G069000.2  | 1.5872  | 9.7715   | -2.6221 | Down | 4.12E-26  | 2.23E-25  |
| Unigene52958  | Potri.006G279600.4  | 1.012   | 6.2303   | -2.6221 | Down | 1.68E-07  | 4.09E-07  |
| Unigene115849 | Potri.005G196300.5  | 0.8674  | 5.3402   | -2.6221 | Down | 1.68E-07  | 4.09E-07  |
| Unigene100123 | Potri.003G090300.2  | 2.3736  | 14.6128  | -2.6221 | Down | 1.50E-44  | 1.31E-43  |
| Unigene113556 | Potri.001G100800.2  | 1.0199  | 6.2789   | -2.6221 | Down | 1.68E-07  | 4.09E-07  |
| Unigene87885  | Potri.018G126700.1  | 0.8083  | 4.9765   | -2.6222 | Down | 1.68E-07  | 4.09E-07  |
| Unigene23656  | Potri.001G449500.12 | 36.6096 | 225.4553 | -2.6225 | Down | 0         | 0         |

|               |                    |         |          |         |      |           |           |
|---------------|--------------------|---------|----------|---------|------|-----------|-----------|
| Unigene12278  | Potri.011G142000.1 | 3.8312  | 23.5971  | -2.6227 | Down | 4.32E-48  | 4.06E-47  |
| Unigene43444  | Potri.006G153300.1 | 1.8638  | 11.4815  | -2.623  | Down | 5.12E-70  | 7.20E-69  |
| Unigene18915  | Potri.011G122900.1 | 1.2601  | 7.7655   | -2.6235 | Down | 1.66E-23  | 8.29E-23  |
| Unigene106909 | Potri.012G060000.1 | 0.5642  | 3.4782   | -2.6241 | Down | 2.49E-17  | 1.00E-16  |
| Unigene106947 | Potri.006G057400.5 | 1.4105  | 8.6955   | -2.6241 | Down | 2.49E-17  | 1.00E-16  |
| Unigene26078  | Potri.015G095000.3 | 10.2371 | 63.117   | -2.6242 | Down | 2.81E-90  | 5.29E-89  |
| Unigene55254  | Potri.016G137300.3 | 7.8968  | 48.6929  | -2.6244 | Down | 6.67E-43  | 5.59E-42  |
| Unigene41655  | Potri.018G053000.1 | 3.2978  | 20.3376  | -2.6246 | Down | 4.62E-27  | 2.57E-26  |
| Unigene85012  | Potri.008G005200.1 | 7.6175  | 46.9771  | -2.6246 | Down | 1.41E-52  | 1.45E-51  |
| Unigene4421   | Potri.006G167200.1 | 26.5186 | 163.5444 | -2.6246 | Down | 2.51E-189 | 1.23E-187 |
| Unigene119496 | Potri.009G137000.1 | 1.613   | 9.9486   | -2.6247 | Down | 9.22E-37  | 6.70E-36  |
| Unigene7479   | Potri.018G145900.1 | 12.2925 | 75.8233  | -2.6249 | Down | 5.03E-206 | 2.71E-204 |
| Unigene36868  | Potri.012G021800.5 | 10.5537 | 65.1063  | -2.625  | Down | 8.78E-66  | 1.16E-64  |
| Unigene30929  | Potri.014G051300.1 | 1.0575  | 6.5249   | -2.6253 | Down | 4.04E-11  | 1.23E-10  |
| Unigene25671  | Potri.011G100800.1 | 1.865   | 11.5076  | -2.6253 | Down | 4.04E-11  | 1.23E-10  |
| Unigene106628 | Potri.002G019100.1 | 0.8602  | 5.3075   | -2.6253 | Down | 4.04E-11  | 1.23E-10  |
| Unigene25476  | Potri.015G084800.1 | 0.7741  | 4.7767   | -2.6254 | Down | 4.04E-11  | 1.23E-10  |
| Unigene108100 | Potri.009G036900.1 | 2.0014  | 12.3496  | -2.6254 | Down | 4.04E-11  | 1.23E-10  |
| Unigene31480  | Potri.008G045300.1 | 5.8115  | 35.8593  | -2.6254 | Down | 5.51E-50  | 5.38E-49  |
| Unigene41601  | Potri.016G045200.1 | 2.2692  | 14.0063  | -2.6258 | Down | 7.53E-44  | 6.44E-43  |
| Unigene22914  | Potri.009G128500.1 | 1.4361  | 8.865    | -2.626  | Down | 3.66E-34  | 2.48E-33  |
| Unigene44399  | Potri.007G028800.2 | 13.4213 | 82.8543  | -2.6261 | Down | 6.90E-145 | 2.36E-143 |
| Unigene102643 | Potri.009G163400.2 | 1.4035  | 8.6651   | -2.6262 | Down | 1.86E-24  | 9.57E-24  |
| Unigene95639  | Potri.002G195300.3 | 1.603   | 9.8969   | -2.6262 | Down | 1.86E-24  | 9.57E-24  |
| Unigene118674 | Potri.007G133700.1 | 3.2469  | 20.0499  | -2.6265 | Down | 1.04E-37  | 7.71E-37  |
| Unigene58351  | Potri.013G005900.2 | 13.0424 | 80.5494  | -2.6267 | Down | 1.02E-139 | 3.34E-138 |
| Unigene62352  | Potri.010G074300.1 | 8.5005  | 52.5013  | -2.6267 | Down | 1.04E-103 | 2.32E-102 |
| Unigene18984  | Potri.001G320500.3 | 10.1856 | 62.9053  | -2.6267 | Down | 1.54E-126 | 4.41E-125 |
| Unigene103746 | Potri.015G000100.1 | 1.3103  | 8.0935   | -2.6269 | Down | 1.04E-14  | 3.74E-14  |
| Unigene13913  | Potri.014G100700.1 | 1.3755  | 8.4964   | -2.6269 | Down | 1.80E-54  | 1.92E-53  |
| Unigene8041   | Potri.012G129700.1 | 2.0382  | 12.5899  | -2.6269 | Down | 5.17E-28  | 2.97E-27  |
| Unigene28031  | Potri.012G120200.3 | 1.457   | 8.9998   | -2.6269 | Down | 1.04E-14  | 3.74E-14  |
| Unigene6865   | Potri.011G106400.1 | 1.8314  | 11.3124  | -2.6269 | Down | 5.17E-28  | 2.97E-27  |
| Unigene106180 | Potri.001G423700.1 | 1.7162  | 10.601   | -2.6269 | Down | 1.04E-14  | 3.74E-14  |
| Unigene1602   | Potri.007G102400.3 | 4.6132  | 28.4968  | -2.627  | Down | 1.19E-176 | 5.27E-175 |
| Unigene12832  | Potri.005G194700.3 | 8.9159  | 55.0784  | -2.627  | Down | 1.37E-97  | 2.84E-96  |
| Unigene119348 | Potri.002G106500.2 | 2.5925  | 16.0171  | -2.6272 | Down | 8.49E-45  | 7.41E-44  |
| Unigene11650  | Potri.009G013900.1 | 11.5614 | 71.4368  | -2.6274 | Down | 0         | 0         |
| Unigene28144  | Potri.014G000600.1 | 2.3742  | 14.674   | -2.6277 | Down | 4.11E-35  | 2.85E-34  |

|               |                    |         |          |         |      |           |           |
|---------------|--------------------|---------|----------|---------|------|-----------|-----------|
| Unigene60570  | Potri.014G154400.1 | 9.4074  | 58.1441  | -2.6278 | Down | 7.03E-52  | 7.14E-51  |
| Unigene15552  | Potri.009G098800.1 | 1.1931  | 7.3741   | -2.6278 | Down | 2.77E-18  | 1.15E-17  |
| Unigene44636  | Potri.008G079200.1 | 4.9215  | 30.418   | -2.6278 | Down | 7.03E-52  | 7.14E-51  |
| Unigene28090  | Potri.005G145400.5 | 4.4107  | 27.2722  | -2.6284 | Down | 3.34E-42  | 2.76E-41  |
| Unigene32685  | Potri.001G080200.1 | 3.1971  | 19.7737  | -2.6287 | Down | 2.08E-25  | 1.10E-24  |
| Unigene74379  | Potri.011G052900.1 | 10.0622 | 62.2403  | -2.6289 | Down | 7.95E-53  | 8.22E-52  |
| Unigene38949  | Potri.016G127700.1 | 3.3516  | 20.7332  | -2.629  | Down | 5.80E-29  | 3.42E-28  |
| Unigene66390  | Potri.005G207700.1 | 4.043   | 25.0104  | -2.629  | Down | 5.80E-29  | 3.42E-28  |
| Unigene32122  | Potri.009G063700.1 | 6.3594  | 39.3463  | -2.6293 | Down | 1.34E-217 | 7.66E-216 |
| Unigene75769  | Potri.002G010300.1 | 11.7611 | 72.7678  | -2.6293 | Down | 1.93E-63  | 2.44E-62  |
| Unigene41449  | Potri.002G139400.1 | 5.2933  | 32.7582  | -2.6296 | Down | 1.32E-39  | 1.02E-38  |
| Unigene2360   | Potri.004G205000.1 | 1.676   | 10.3738  | -2.6299 | Down | 1.08E-46  | 9.84E-46  |
| Unigene45609  | Potri.001G092300.1 | 2.1433  | 13.2687  | -2.6301 | Down | 7.53E-61  | 9.08E-60  |
| Unigene108253 | Potri.011G073900.1 | 12.8557 | 79.5901  | -2.6302 | Down | 2.19E-64  | 2.81E-63  |
| Unigene83414  | Potri.017G150100.1 | 89.8517 | 556.3186 | -2.6303 | Down | 0         | 0         |
| Unigene32358  | Potri.005G188700.1 | 2.7172  | 16.8252  | -2.6304 | Down | 3.94E-89  | 7.31E-88  |
| Unigene6476   | Potri.003G219000.1 | 9.6552  | 59.7851  | -2.6304 | Down | 1.35E-85  | 2.39E-84  |
| Unigene115335 | Potri.009G014400.1 | 0.5199  | 3.2204   | -2.6309 | Down | 8.28E-05  | 1.60E-04  |
| Unigene24998  | Potri.015G011400.2 | 0.5761  | 3.5686   | -2.631  | Down | 8.28E-05  | 1.60E-04  |
| Unigene108758 | Potri.011G057100.1 | 0.7139  | 4.4223   | -2.631  | Down | 8.28E-05  | 1.60E-04  |
| Unigene108837 | Potri.010G104300.2 | 0.7105  | 4.4012   | -2.631  | Down | 8.28E-05  | 1.60E-04  |
| Unigene110121 | Potri.010G076900.2 | 0.6782  | 4.2012   | -2.631  | Down | 8.28E-05  | 1.60E-04  |
| Unigene4943   | Potri.009G160900.1 | 0.8036  | 4.9781   | -2.631  | Down | 4.41E-12  | 1.40E-11  |
| Unigene115998 | Potri.009G109800.1 | 0.4908  | 3.0403   | -2.631  | Down | 8.28E-05  | 1.60E-04  |
| Unigene104522 | Potri.008G141600.1 | 0.6115  | 3.7879   | -2.631  | Down | 8.28E-05  | 1.60E-04  |
| Unigene114918 | Potri.008G131300.1 | 0.5348  | 3.3128   | -2.631  | Down | 8.28E-05  | 1.60E-04  |
| Unigene105630 | Potri.007G055600.1 | 0.5348  | 3.3128   | -2.631  | Down | 8.28E-05  | 1.60E-04  |
| Unigene112190 | Potri.006G227200.3 | 0.6217  | 3.8511   | -2.631  | Down | 8.28E-05  | 1.60E-04  |
| Unigene111226 | Potri.004G138300.3 | 0.6487  | 4.0185   | -2.631  | Down | 8.28E-05  | 1.60E-04  |
| Unigene53198  | Potri.003G146000.4 | 0.5968  | 3.697    | -2.631  | Down | 8.28E-05  | 1.60E-04  |
| Unigene104651 | Potri.003G123600.1 | 1.5364  | 9.5175   | -2.631  | Down | 1.83E-33  | 1.22E-32  |
| Unigene111250 | Potri.002G114800.1 | 0.6459  | 4.0011   | -2.631  | Down | 8.28E-05  | 1.60E-04  |
| Unigene106856 | Potri.001G252000.1 | 1.2591  | 7.7997   | -2.631  | Down | 1.15E-15  | 4.30E-15  |
| Unigene51097  | Potri.001G229700.1 | 1.865   | 11.5532  | -2.631  | Down | 4.41E-12  | 1.40E-11  |
| Unigene47849  | Potri.016G118400.1 | 0.6431  | 3.9839   | -2.6311 | Down | 1.79E-08  | 4.67E-08  |
| Unigene35830  | Potri.011G109600.1 | 0.4924  | 3.0504   | -2.6311 | Down | 8.28E-05  | 1.60E-04  |
| Unigene111773 | Potri.006G003200.1 | 0.6322  | 3.9164   | -2.6311 | Down | 8.28E-05  | 1.60E-04  |
| Unigene40411  | Potri.005G240900.1 | 0.5805  | 3.5963   | -2.6311 | Down | 8.28E-05  | 1.60E-04  |
| Unigene29375  | Potri.004G222000.1 | 2.168   | 13.4305  | -2.6311 | Down | 1.48E-40  | 1.18E-39  |

|               |                     |         |          |         |      |           |           |
|---------------|---------------------|---------|----------|---------|------|-----------|-----------|
| Unigene113319 | Potri.004G183900.1  | 0.5897  | 3.6532   | -2.6311 | Down | 8.28E-05  | 1.60E-04  |
| Unigene84027  | Potri.004G046600.1  | 1.6276  | 10.0828  | -2.6311 | Down | 4.41E-12  | 1.40E-11  |
| Unigene95948  | Potri.004G039700.1  | 0.6972  | 4.319    | -2.6311 | Down | 8.28E-05  | 1.60E-04  |
| Unigene25682  | Potri.001G251500.1  | 0.5127  | 3.1762   | -2.6311 | Down | 8.28E-05  | 1.60E-04  |
| Unigene2096   | Potri.001G012300.1  | 1.5147  | 9.3833   | -2.6311 | Down | 1.15E-15  | 4.30E-15  |
| Unigene35949  | Potri.014G124200.1  | 0.5716  | 3.5412   | -2.6312 | Down | 8.28E-05  | 1.60E-04  |
| Unigene111535 | Potri.007G126900.2  | 0.6403  | 3.9668   | -2.6312 | Down | 8.28E-05  | 1.60E-04  |
| Unigene115831 | Potri.004G025200.1  | 0.4973  | 3.0809   | -2.6312 | Down | 8.28E-05  | 1.60E-04  |
| Unigene18197  | Potri.007G094500.1  | 8.3683  | 51.8593  | -2.6316 | Down | 1.86E-208 | 1.01E-206 |
| Unigene28615  | Potri.010G159900.1  | 3.5583  | 22.0545  | -2.6318 | Down | 6.93E-77  | 1.09E-75  |
| Unigene40903  | Potri.014G156200.1  | 2.6705  | 16.5552  | -2.6321 | Down | 1.15E-55  | 1.26E-54  |
| Unigene21944  | Potri.014G155300.1  | 2.0823  | 12.9096  | -2.6322 | Down | 3.97E-52  | 4.05E-51  |
| Unigene82967  | Potri.008G171000.1  | 36.1735 | 224.2789 | -2.6323 | Down | 6.27E-229 | 3.84E-227 |
| Unigene38255  | Potri.018G126900.1  | 1.7837  | 11.0605  | -2.6325 | Down | 1.67E-41  | 1.36E-40  |
| Unigene67093  | Potri.002G134300.2  | 2.879   | 17.8524  | -2.6325 | Down | 1.67E-41  | 1.36E-40  |
| Unigene90064  | Potri.002G083200.8  | 61.6646 | 382.4076 | -2.6326 | Down | 0         | 0         |
| Unigene48605  | Potri.005G179500.4  | 3.4502  | 21.3986  | -2.6328 | Down | 2.06E-34  | 1.41E-33  |
| Unigene55541  | Potri.012G027600.1  | 8.2621  | 51.2469  | -2.6329 | Down | 6.53E-93  | 1.27E-91  |
| Unigene27998  | Potri.006G041100.1  | 1.4022  | 8.7018   | -2.6336 | Down | 9.37E-24  | 4.72E-23  |
| Unigene51099  | Potri.005G159300.1  | 2.4866  | 15.4362  | -2.6341 | Down | 3.42E-20  | 1.53E-19  |
| Unigene72655  | Potri.T046200.1     | 29.5886 | 183.7314 | -2.6345 | Down | 5.13E-148 | 1.81E-146 |
| Unigene117135 | Potri.017G051200.1  | 1.8274  | 11.3491  | -2.6347 | Down | 1.27E-16  | 4.95E-16  |
| Unigene87672  | Potri.001G025100.16 | 66.6481 | 413.9454 | -2.6348 | Down | 0         | 0         |
| Unigene86950  | Potri.014G001100.3  | 11.868  | 73.7164  | -2.6349 | Down | 1.11E-88  | 2.04E-87  |
| Unigene81979  | Potri.002G239900.1  | 62.8888 | 390.6376 | -2.635  | Down | 0         | 0         |
| Unigene103776 | Potri.001G050700.4  | 1.3832  | 8.5934   | -2.6352 | Down | 2.92E-28  | 1.68E-27  |
| Unigene6679   | Potri.007G074800.3  | 1.9946  | 12.3922  | -2.6353 | Down | 2.92E-28  | 1.68E-27  |
| Unigene119358 | Potri.014G094100.1  | 0.6801  | 4.2271   | -2.6358 | Down | 4.83E-13  | 1.61E-12  |
| Unigene102481 | Potri.018G036500.3  | 1.1914  | 7.4051   | -2.6359 | Down | 4.83E-13  | 1.61E-12  |
| Unigene113626 | Potri.010G138100.1  | 1.8867  | 11.7272  | -2.6359 | Down | 4.83E-13  | 1.61E-12  |
| Unigene20067  | Potri.008G189200.1  | 1.1198  | 6.9605   | -2.6359 | Down | 4.83E-13  | 1.61E-12  |
| Unigene52724  | Potri.005G054400.3  | 1.1827  | 7.351    | -2.6359 | Down | 4.83E-13  | 1.61E-12  |
| Unigene106877 | Potri.002G139200.1  | 1.1463  | 7.125    | -2.6359 | Down | 4.83E-13  | 1.61E-12  |
| Unigene69362  | Potri.T128700.2     | 3.4175  | 21.2498  | -2.6364 | Down | 9.21E-33  | 6.04E-32  |
| Unigene49731  | Potri.013G161100.2  | 1.2303  | 7.6515   | -2.6367 | Down | 3.80E-21  | 1.76E-20  |
| Unigene2742   | Potri.004G027300.1  | 1.5934  | 9.9097   | -2.6367 | Down | 3.80E-21  | 1.76E-20  |
| Unigene45674  | Potri.002G014400.1  | 2.3707  | 14.7459  | -2.6369 | Down | 2.03E-68  | 2.77E-67  |
| Unigene81062  | Potri.011G138900.1  | 4.5884  | 28.5443  | -2.6371 | Down | 3.27E-29  | 1.94E-28  |
| Unigene93770  | Potri.009G045100.2  | 25.3707 | 157.857  | -2.6374 | Down | 0         | 0         |

|               |                    |         |          |         |      |           |           |
|---------------|--------------------|---------|----------|---------|------|-----------|-----------|
| Unigene101174 | Potri.018G022700.7 | 5.3657  | 33.3941  | -2.6378 | Down | 2.08E-93  | 4.07E-92  |
| Unigene13700  | Potri.009G095800.3 | 12.7134 | 79.1252  | -2.6378 | Down | 1.99E-109 | 4.76E-108 |
| Unigene102805 | Potri.010G144500.1 | 1.4854  | 9.2462   | -2.638  | Down | 1.93E-09  | 5.33E-09  |
| Unigene16088  | Potri.007G051000.3 | 3.0152  | 18.7691  | -2.638  | Down | 1.17E-25  | 6.25E-25  |
| Unigene104103 | Potri.006G154800.1 | 1.3591  | 8.46     | -2.638  | Down | 1.93E-09  | 5.33E-09  |
| Unigene110739 | Potri.006G069300.1 | 1.4854  | 9.2462   | -2.638  | Down | 1.93E-09  | 5.33E-09  |
| Unigene117649 | Potri.005G183900.1 | 0.8976  | 5.5872   | -2.638  | Down | 1.93E-09  | 5.33E-09  |
| Unigene51006  | Potri.004G158000.1 | 1.0864  | 6.7626   | -2.638  | Down | 1.93E-09  | 5.33E-09  |
| Unigene4496   | Potri.001G076600.1 | 1.2936  | 8.0525   | -2.638  | Down | 1.40E-17  | 5.70E-17  |
| Unigene116799 | Potri.008G026600.1 | 1.0111  | 6.2941   | -2.6381 | Down | 1.93E-09  | 5.33E-09  |
| Unigene42067  | Potri.005G186900.1 | 7.6748  | 47.7923  | -2.6386 | Down | 3.05E-46  | 2.75E-45  |
| Unigene50040  | Potri.007G041100.3 | 2.9081  | 18.1174  | -2.6392 | Down | 1.06E-42  | 8.87E-42  |
| Unigene50350  | Potri.019G084800.1 | 4.7616  | 29.6687  | -2.6394 | Down | 3.23E-55  | 3.51E-54  |
| Unigene21510  | Potri.011G058100.3 | 9.7006  | 60.4618  | -2.6399 | Down | 6.51E-255 | 4.61E-253 |
| Unigene38750  | Potri.017G054400.1 | 1.5136  | 9.4348   | -2.64   | Down | 5.30E-14  | 1.85E-13  |
| Unigene27605  | Potri.008G116400.1 | 1.5314  | 9.5455   | -2.64   | Down | 5.30E-14  | 1.85E-13  |
| Unigene118944 | Potri.002G221300.1 | 2.9614  | 18.4594  | -2.64   | Down | 3.72E-39  | 2.86E-38  |
| Unigene68595  | Potri.T029400.1    | 13.9393 | 86.8953  | -2.6401 | Down | 4.13E-131 | 1.24E-129 |
| Unigene11177  | Potri.009G042000.1 | 6.3458  | 39.5589  | -2.6401 | Down | 1.25E-118 | 3.32E-117 |
| Unigene91717  | Potri.T146100.4    | 40.7215 | 253.9226 | -2.6405 | Down | 0         | 0         |
| Unigene66511  | Potri.T077100.1    | 3.5786  | 22.3169  | -2.6407 | Down | 3.88E-48  | 3.65E-47  |
| Unigene63752  | Potri.008G041400.1 | 5.2849  | 32.9584  | -2.6407 | Down | 3.88E-48  | 3.65E-47  |
| Unigene44855  | Potri.004G111400.1 | 14.7578 | 92.0527  | -2.641  | Down | 1.85E-294 | 1.60E-292 |
| Unigene21200  | Potri.002G262900.1 | 4.5679  | 28.4933  | -2.641  | Down | 5.97E-142 | 1.99E-140 |
| Unigene13748  | Potri.002G163000.1 | 3.357   | 20.941   | -2.6411 | Down | 4.27E-74  | 6.39E-73  |
| Unigene40877  | Potri.015G117500.1 | 1.2313  | 7.6833   | -2.6415 | Down | 4.73E-23  | 2.32E-22  |
| Unigene3880   | Potri.015G017700.1 | 1.5733  | 9.8168   | -2.6415 | Down | 4.73E-23  | 2.32E-22  |
| Unigene119400 | Potri.002G036600.1 | 1.7138  | 10.698   | -2.6421 | Down | 4.62E-32  | 2.97E-31  |
| Unigene66809  | Potri.009G053300.8 | 4.9311  | 30.786   | -2.6423 | Down | 1.47E-36  | 1.06E-35  |
| Unigene39148  | Potri.T050500.2    | 1.7239  | 10.7639  | -2.6425 | Down | 4.72E-41  | 3.80E-40  |
| Unigene43062  | Potri.013G047600.1 | 9.7958  | 61.1708  | -2.6426 | Down | 3.04E-234 | 1.91E-232 |
| Unigene11077  | Potri.008G159400.1 | 13.4326 | 83.8803  | -2.6426 | Down | 0         | 0         |
| Unigene57993  | Potri.014G195000.1 | 2.7681  | 17.2968  | -2.6435 | Down | 1.65E-37  | 1.22E-36  |
| Unigene100343 | Potri.014G128200.1 | 0.8326  | 5.2025   | -2.6435 | Down | 8.49E-06  | 1.80E-05  |
| Unigene105084 | Potri.012G098300.2 | 0.8881  | 5.5494   | -2.6435 | Down | 2.09E-10  | 6.09E-10  |
| Unigene106397 | Potri.010G134200.1 | 1.5895  | 9.9321   | -2.6435 | Down | 5.84E-15  | 2.13E-14  |
| Unigene116335 | Potri.010G111300.1 | 0.5921  | 3.6996   | -2.6435 | Down | 8.49E-06  | 1.80E-05  |
| Unigene37145  | Potri.010G051600.1 | 0.5518  | 3.4478   | -2.6435 | Down | 8.49E-06  | 1.80E-05  |
| Unigene34097  | Potri.009G011800.1 | 2.8319  | 17.6954  | -2.6435 | Down | 5.19E-33  | 3.42E-32  |



|               |                     |         |         |         |      |           |           |
|---------------|---------------------|---------|---------|---------|------|-----------|-----------|
| Unigene64313  | Potri.005G143400.1  | 3.3453  | 20.9035 | -2.6435 | Down | 1.73E-19  | 7.55E-19  |
| Unigene104321 | Potri.002G160300.3  | 0.7401  | 4.6245  | -2.6435 | Down | 2.09E-10  | 6.09E-10  |
| Unigene41100  | Potri.001G420300.1  | 5.0067  | 31.2851 | -2.6435 | Down | 1.65E-37  | 1.22E-36  |
| Unigene19947  | Potri.001G274500.1  | 1.9495  | 12.1816 | -2.6435 | Down | 5.84E-15  | 2.13E-14  |
| Unigene25957  | Potri.001G201500.2  | 1.1584  | 7.2383  | -2.6435 | Down | 2.09E-10  | 6.09E-10  |
| Unigene41268  | Potri.001G176600.1  | 0.4934  | 3.083   | -2.6435 | Down | 8.49E-06  | 1.80E-05  |
| Unigene94685  | Potri.014G100100.2  | 0.743   | 4.6429  | -2.6436 | Down | 8.49E-06  | 1.80E-05  |
| Unigene112120 | Potri.012G094700.1  | 0.7803  | 4.876   | -2.6436 | Down | 8.49E-06  | 1.80E-05  |
| Unigene56323  | Potri.012G023400.1  | 0.9325  | 5.8269  | -2.6436 | Down | 8.49E-06  | 1.80E-05  |
| Unigene33298  | Potri.009G075300.2  | 1.8676  | 11.6704 | -2.6436 | Down | 5.19E-33  | 3.42E-32  |
| Unigene17462  | Potri.005G202600.1  | 2.5202  | 15.7483 | -2.6436 | Down | 1.64E-28  | 9.55E-28  |
| Unigene102520 | Potri.003G194500.1  | 0.6343  | 3.9638  | -2.6436 | Down | 8.49E-06  | 1.80E-05  |
| Unigene51754  | Potri.003G110700.1  | 0.9764  | 6.1014  | -2.6436 | Down | 2.09E-10  | 6.09E-10  |
| Unigene114300 | Potri.001G237200.1  | 0.6985  | 4.3647  | -2.6436 | Down | 8.49E-06  | 1.80E-05  |
| Unigene21208  | Potri.008G135800.1  | 2.9887  | 18.6773 | -2.6437 | Down | 1.11E-275 | 8.75E-274 |
| Unigene23955  | Potri.001G093300.1  | 8.8605  | 55.3736 | -2.6437 | Down | 2.88E-262 | 2.12E-260 |
| Unigene8746   | Potri.001G080200.1  | 0.5501  | 3.4377  | -2.6437 | Down | 8.49E-06  | 1.80E-05  |
| Unigene14337  | Potri.018G122700.1  | 11.3044 | 70.6594 | -2.644  | Down | 4.48E-205 | 2.40E-203 |
| Unigene43543  | Potri.014G045300.1  | 2.1856  | 13.6616 | -2.644  | Down | 9.65E-97  | 1.98E-95  |
| Unigene17508  | Potri.002G072300.1  | 6.6147  | 41.3729 | -2.6449 | Down | 2.51E-66  | 3.33E-65  |
| Unigene43561  | Potri.007G069300.2  | 1.9929  | 12.4657 | -2.645  | Down | 5.83E-122 | 1.60E-120 |
| Unigene31441  | Potri.014G035800.1  | 5.6383  | 35.2789 | -2.6455 | Down | 2.19E-48  | 2.07E-47  |
| Unigene67108  | Potri.008G039600.6  | 1.9631  | 12.2833 | -2.6455 | Down | 5.90E-25  | 3.08E-24  |
| Unigene1926   | Potri.015G129700.1  | 3.6403  | 22.7925 | -2.6464 | Down | 9.75E-64  | 1.24E-62  |
| Unigene33451  | Potri.009G060800.1  | 7.9849  | 50.0056 | -2.6467 | Down | 1.62E-198 | 8.38E-197 |
| Unigene22432  | Potri.006G175200.1  | 11.8031 | 73.913  | -2.6467 | Down | 1.04E-231 | 6.42E-230 |
| Unigene115711 | Potri.004G203300.1  | 2.0162  | 12.6258 | -2.6467 | Down | 6.44E-16  | 2.44E-15  |
| Unigene25848  | Potri.003G068000.10 | 1.3262  | 8.3049  | -2.6467 | Down | 6.44E-16  | 2.44E-15  |
| Unigene23187  | Potri.016G113600.1  | 10.7045 | 67.047  | -2.647  | Down | 1.79E-146 | 6.21E-145 |
| Unigene33581  | Potri.002G198500.1  | 1.8719  | 11.7269 | -2.6472 | Down | 6.59E-26  | 3.55E-25  |
| Unigene102021 | Potri.013G154600.4  | 1.5781  | 9.8917  | -2.648  | Down | 2.27E-11  | 6.98E-11  |
| Unigene16378  | Potri.009G062100.2  | 0.5667  | 3.5523  | -2.6481 | Down | 2.27E-11  | 6.98E-11  |
| Unigene10207  | Potri.005G121600.2  | 2.9992  | 18.8001 | -2.6481 | Down | 3.15E-51  | 3.15E-50  |
| Unigene37278  | Potri.005G064200.1  | 1.2103  | 7.5866  | -2.6481 | Down | 2.27E-11  | 6.98E-11  |
| Unigene10013  | Potri.001G168100.1  | 1.1962  | 7.4981  | -2.6481 | Down | 2.27E-11  | 6.98E-11  |
| Unigene1468   | Potri.001G088600.1  | 14.484  | 90.7965 | -2.6482 | Down | 3.99E-205 | 2.14E-203 |
| Unigene31983  | Potri.005G040500.1  | 6.256   | 39.2223 | -2.6484 | Down | 5.85E-216 | 3.32E-214 |
| Unigene15906  | Potri.003G062100.1  | 1.0994  | 6.8949  | -2.6488 | Down | 7.38E-27  | 4.09E-26  |
| Unigene19571  | Potri.019G125300.1  | 2.6848  | 16.8385 | -2.6489 | Down | 7.38E-27  | 4.09E-26  |

|               |                    |         |          |         |      |           |           |
|---------------|--------------------|---------|----------|---------|------|-----------|-----------|
| Unigene1154   | Potri.017G083000.1 | 6.3682  | 39.9402  | -2.6489 | Down | 1.16E-102 | 2.56E-101 |
| Unigene26034  | Potri.019G034900.1 | 2.9813  | 18.7008  | -2.6491 | Down | 2.99E-42  | 2.48E-41  |
| Unigene12771  | Potri.004G002000.1 | 3.718   | 23.3229  | -2.6491 | Down | 1.31E-57  | 1.49E-56  |
| Unigene40522  | Potri.014G074900.1 | 3.5926  | 22.5401  | -2.6494 | Down | 2.60E-32  | 1.68E-31  |
| Unigene43790  | Potri.016G023200.1 | 18.876  | 118.4663 | -2.6499 | Down | 5.96E-265 | 4.44E-263 |
| Unigene22712  | Potri.004G178600.8 | 3.9407  | 24.7332  | -2.6499 | Down | 2.53E-79  | 4.12E-78  |
| Unigene43383  | Potri.015G095900.1 | 2.0554  | 12.9007  | -2.65   | Down | 4.48E-100 | 9.61E-99  |
| Unigene17802  | Potri.014G042800.1 | 0.9335  | 5.8594   | -2.65   | Down | 2.38E-22  | 1.14E-21  |
| Unigene21517  | Potri.014G117800.1 | 3.5589  | 22.3415  | -2.6502 | Down | 1.23E-48  | 1.17E-47  |
| Unigene48373  | Potri.004G030300.1 | 3.2314  | 20.2915  | -2.6506 | Down | 2.92E-33  | 1.94E-32  |
| Unigene2168   | Potri.001G175600.1 | 2.014   | 12.647   | -2.6507 | Down | 1.51E-133 | 4.65E-132 |
| Unigene45588  | Potri.004G106400.1 | 5.2175  | 32.7701  | -2.6509 | Down | 1.22E-86  | 2.19E-85  |
| Unigene40434  | Potri.013G028700.1 | 15.8678 | 99.686   | -2.6513 | Down | 7.40E-141 | 2.44E-139 |
| Unigene101226 | Potri.018G146000.1 | 0.8198  | 5.1519   | -2.6518 | Down | 8.87E-07  | 2.05E-06  |
| Unigene98442  | Potri.017G140000.1 | 0.538   | 3.381    | -2.6518 | Down | 8.87E-07  | 2.05E-06  |
| Unigene107373 | Potri.016G110700.1 | 1.119   | 7.0324   | -2.6518 | Down | 8.87E-07  | 2.05E-06  |
| Unigene28093  | Potri.015G145400.1 | 1.2974  | 8.1535   | -2.6518 | Down | 2.48E-12  | 7.98E-12  |
| Unigene117874 | Potri.014G009200.1 | 0.5753  | 3.6156   | -2.6518 | Down | 8.87E-07  | 2.05E-06  |
| Unigene110029 | Potri.012G037100.2 | 3.0518  | 19.1793  | -2.6518 | Down | 7.89E-18  | 3.24E-17  |
| Unigene104016 | Potri.008G117000.1 | 0.5851  | 3.6771   | -2.6518 | Down | 2.48E-12  | 7.98E-12  |
| Unigene107169 | Potri.007G066300.1 | 1.0725  | 6.7403   | -2.6518 | Down | 7.89E-18  | 3.24E-17  |
| Unigene6726   | Potri.005G228100.1 | 1.3815  | 8.682    | -2.6518 | Down | 7.89E-18  | 3.24E-17  |
| Unigene104868 | Potri.002G098100.2 | 0.8553  | 5.3751   | -2.6518 | Down | 7.89E-18  | 3.24E-17  |
| Unigene107554 | Potri.002G072900.2 | 1.1134  | 6.9974   | -2.6518 | Down | 8.87E-07  | 2.05E-06  |
| Unigene96388  | Potri.001G470600.1 | 1.865   | 11.7207  | -2.6518 | Down | 2.48E-12  | 7.98E-12  |
| Unigene8597   | Potri.015G066400.1 | 0.8916  | 5.6035   | -2.6519 | Down | 2.48E-12  | 7.98E-12  |
| Unigene108023 | Potri.009G123100.1 | 1.097   | 6.8945   | -2.6519 | Down | 8.87E-07  | 2.05E-06  |
| Unigene117116 | Potri.008G076200.1 | 0.6468  | 4.065    | -2.6519 | Down | 8.87E-07  | 2.05E-06  |
| Unigene114021 | Potri.005G106900.1 | 0.8509  | 5.3478   | -2.6519 | Down | 8.87E-07  | 2.05E-06  |
| Unigene116766 | Potri.005G106100.1 | 0.6761  | 4.2492   | -2.6519 | Down | 8.87E-07  | 2.05E-06  |
| Unigene115853 | Potri.003G172600.4 | 0.7435  | 4.6727   | -2.6519 | Down | 8.87E-07  | 2.05E-06  |
| Unigene6852   | Potri.003G040700.3 | 1.0846  | 6.8166   | -2.6519 | Down | 7.89E-18  | 3.24E-17  |
| Unigene30997  | Potri.004G193500.2 | 6.1402  | 38.6054  | -2.6524 | Down | 2.42E-62  | 3.00E-61  |
| Unigene8797   | Potri.013G069600.1 | 2.5888  | 16.279   | -2.6527 | Down | 2.01E-90  | 3.79E-89  |
| Unigene22294  | Potri.004G093800.1 | 29.9388 | 188.2706 | -2.6527 | Down | 0         | 0         |
| Unigene38303  | Potri.013G113000.3 | 3.4109  | 21.4558  | -2.6531 | Down | 7.38E-58  | 8.44E-57  |
| Unigene92931  | Potri.003G058900.1 | 19.2258 | 120.9435 | -2.6532 | Down | 2.43E-243 | 1.62E-241 |
| Unigene9130   | Potri.010G253000.1 | 3.9451  | 24.826   | -2.6537 | Down | 1.50E-41  | 1.22E-40  |
| Unigene15262  | Potri.011G144300.1 | 1.5962  | 10.0463  | -2.654  | Down | 8.75E-19  | 3.72E-18  |

|               |                    |          |          |         |      |           |           |
|---------------|--------------------|----------|----------|---------|------|-----------|-----------|
| Unigene38515  | Potri.015G116700.2 | 1.1467   | 7.2177   | -2.6541 | Down | 8.75E-19  | 3.72E-18  |
| Unigene13428  | Potri.002G025200.1 | 7.6756   | 48.3179  | -2.6542 | Down | 2.03E-111 | 5.00E-110 |
| Unigene13370  | Potri.009G038300.4 | 8.0745   | 50.832   | -2.6543 | Down | 3.32E-123 | 9.22E-122 |
| Unigene100675 | Potri.010G086600.2 | 0.8282   | 5.2162   | -2.6549 | Down | 3.32E-25  | 1.75E-24  |
| Unigene102761 | Potri.002G254600.2 | 1.9954   | 12.5682  | -2.655  | Down | 3.32E-25  | 1.75E-24  |
| Unigene63336  | Potri.006G186800.2 | 130.8141 | 824.1974 | -2.6555 | Down | 0         | 0         |
| Unigene49814  | Potri.015G146100.2 | 6.0436   | 38.0806  | -2.6556 | Down | 1.28E-91  | 2.46E-90  |
| Unigene5560   | Potri.005G158300.4 | 1.8426   | 11.6104  | -2.6556 | Down | 1.30E-31  | 8.28E-31  |
| Unigene1785   | Potri.001G149400.1 | 11.3055  | 71.2353  | -2.6556 | Down | 2.96E-241 | 1.95E-239 |
| Unigene42698  | Potri.001G380500.1 | 10.661   | 67.1964  | -2.656  | Down | 0         | 0         |
| Unigene31137  | Potri.001G081900.1 | 4.5892   | 28.9291  | -2.6562 | Down | 2.14E-44  | 1.85E-43  |
| Unigene38     | Potri.011G097700.1 | 7.1584   | 45.1315  | -2.6564 | Down | 0         | 0         |
| Unigene22078  | Potri.016G032600.1 | 10.0644  | 63.4646  | -2.6567 | Down | 3.62E-255 | 2.57E-253 |
| Unigene1206   | Potri.008G198600.5 | 3.2044   | 20.2077  | -2.6568 | Down | 6.50E-70  | 9.11E-69  |
| Unigene19963  | Potri.006G087200.1 | 8.4452   | 53.2644  | -2.657  | Down | 2.41E-45  | 2.14E-44  |
| Unigene61671  | Potri.006G258800.1 | 5.7225   | 36.0998  | -2.6573 | Down | 3.11E-77  | 4.90E-76  |
| Unigene5665   | Potri.005G001900.1 | 0.6353   | 4.0087   | -2.6576 | Down | 9.39E-08  | 2.33E-07  |
| Unigene116340 | Potri.001G330900.4 | 0.8263   | 5.2139   | -2.6576 | Down | 9.39E-08  | 2.33E-07  |
| Unigene15790  | Potri.019G126300.2 | 0.759    | 4.7895   | -2.6577 | Down | 9.39E-08  | 2.33E-07  |
| Unigene50225  | Potri.018G038500.1 | 2.8771   | 18.1553  | -2.6577 | Down | 4.15E-27  | 2.32E-26  |
| Unigene117166 | Potri.016G057200.1 | 0.7503   | 4.7345   | -2.6577 | Down | 9.39E-08  | 2.33E-07  |
| Unigene103667 | Potri.015G139400.1 | 1.9269   | 12.1594  | -2.6577 | Down | 4.15E-27  | 2.32E-26  |
| Unigene47909  | Potri.015G131000.1 | 2.8692   | 18.1054  | -2.6577 | Down | 1.08E-20  | 4.92E-20  |
| Unigene99197  | Potri.015G110500.1 | 0.6058   | 3.8227   | -2.6577 | Down | 9.39E-08  | 2.33E-07  |
| Unigene118446 | Potri.013G144500.1 | 0.5907   | 3.7276   | -2.6577 | Down | 9.39E-08  | 2.33E-07  |
| Unigene116332 | Potri.012G092400.1 | 0.8289   | 5.2305   | -2.6577 | Down | 9.39E-08  | 2.33E-07  |
| Unigene36282  | Potri.008G135900.1 | 2.4101   | 15.2086  | -2.6577 | Down | 1.08E-20  | 4.92E-20  |
| Unigene3490   | Potri.001G387300.1 | 6.3682   | 40.1852  | -2.6577 | Down | 4.70E-59  | 5.50E-58  |
| Unigene116566 | Potri.009G168300.1 | 0.8083   | 5.1009   | -2.6578 | Down | 9.39E-08  | 2.33E-07  |
| Unigene99582  | Potri.006G266300.1 | 0.6527   | 4.119    | -2.6578 | Down | 9.39E-08  | 2.33E-07  |
| Unigene77511  | Potri.006G145100.6 | 19.3764  | 122.2952 | -2.658  | Down | 5.69E-111 | 1.39E-109 |
| Unigene30734  | Potri.003G048800.1 | 10.2555  | 64.7383  | -2.6582 | Down | 1.20E-124 | 3.37E-123 |
| Unigene1192   | Potri.001G462800.1 | 7.101    | 44.833   | -2.6585 | Down | 4.38E-171 | 1.86E-169 |
| Unigene13608  | Potri.002G085900.1 | 1.4617   | 9.2317   | -2.6589 | Down | 4.64E-28  | 2.67E-27  |
| Unigene4289   | Potri.003G088300.5 | 8.4299   | 53.2485  | -2.6592 | Down | 2.86E-68  | 3.90E-67  |
| Unigene26131  | Potri.015G053100.3 | 0.7633   | 4.8244   | -2.66   | Down | 3.28E-15  | 1.20E-14  |
| Unigene6488   | Potri.018G032500.1 | 10.8289  | 68.4607  | -2.6604 | Down | 3.74E-133 | 1.15E-131 |
| Unigene5119   | Potri.018G119200.1 | 3.796    | 24.0044  | -2.6607 | Down | 1.34E-22  | 6.49E-22  |
| Unigene17932  | Potri.008G200900.1 | 1.7227   | 10.8936  | -2.6607 | Down | 1.34E-22  | 6.49E-22  |

|               |                    |         |          |         |      |           |           |
|---------------|--------------------|---------|----------|---------|------|-----------|-----------|
| Unigene94628  | Potri.001G426800.1 | 1.0604  | 6.7058   | -2.6608 | Down | 1.34E-22  | 6.49E-22  |
| Unigene4211   | Potri.001G061200.1 | 25.858  | 163.576  | -2.6613 | Down | 4.09E-208 | 2.23E-206 |
| Unigene38163  | Potri.002G260300.2 | 10.4038 | 65.8406  | -2.6619 | Down | 3.79E-125 | 1.07E-123 |
| Unigene51094  | Potri.016G055700.1 | 1.4846  | 9.3965   | -2.662  | Down | 1.00E-08  | 2.66E-08  |
| Unigene103720 | Potri.015G071700.1 | 0.7691  | 4.8678   | -2.662  | Down | 1.00E-08  | 2.66E-08  |
| Unigene118553 | Potri.007G007100.1 | 0.6573  | 4.1601   | -2.662  | Down | 1.00E-08  | 2.66E-08  |
| Unigene118071 | Potri.010G052300.2 | 2.2158  | 14.025   | -2.6621 | Down | 1.49E-23  | 7.47E-23  |
| Unigene72894  | Potri.008G069000.2 | 1.4277  | 9.0369   | -2.6621 | Down | 1.00E-08  | 2.66E-08  |
| Unigene35687  | Potri.004G158600.1 | 1.2081  | 7.6466   | -2.6621 | Down | 1.00E-08  | 2.66E-08  |
| Unigene46827  | Potri.015G140100.1 | 5.5051  | 34.8595  | -2.6627 | Down | 2.02E-91  | 3.86E-90  |
| Unigene22533  | Potri.002G088800.1 | 2.6373  | 16.71    | -2.6636 | Down | 3.74E-40  | 2.94E-39  |
| Unigene26701  | Potri.014G024700.4 | 10.2709 | 65.0826  | -2.6637 | Down | 2.33E-71  | 3.35E-70  |
| Unigene47387  | Potri.011G119500.8 | 11.2625 | 71.3679  | -2.6637 | Down | 6.09E-87  | 1.10E-85  |
| Unigene22586  | Potri.008G039000.1 | 4.9177  | 31.1604  | -2.6637 | Down | 7.89E-110 | 1.90E-108 |
| Unigene1114   | Potri.001G147600.2 | 18.1078 | 114.7511 | -2.6638 | Down | 0         | 0         |
| Unigene115364 | Potri.017G114600.5 | 2.2094  | 14.0018  | -2.6639 | Down | 4.00E-17  | 1.60E-16  |
| Unigene33376  | Potri.010G251700.5 | 5.7211  | 36.2573  | -2.6639 | Down | 3.34E-95  | 6.71E-94  |
| Unigene7520   | Potri.003G100500.1 | 3.3766  | 21.4039  | -2.6642 | Down | 1.43E-80  | 2.37E-79  |
| Unigene119317 | Potri.018G041700.1 | 1.4304  | 9.0683   | -2.6644 | Down | 1.86E-25  | 9.89E-25  |
| Unigene33743  | Potri.005G127000.2 | 7.5342  | 47.7878  | -2.6651 | Down | 5.18E-132 | 1.57E-130 |
| Unigene42387  | Potri.006G253500.1 | 4.8764  | 30.9332  | -2.6653 | Down | 0         | 0         |
| Unigene21512  | Potri.006G262900.1 | 9.0186  | 57.2151  | -2.6654 | Down | 0         | 0         |
| Unigene119297 | Potri.019G023500.1 | 0.5018  | 3.1836   | -2.6655 | Down | 1.08E-09  | 3.02E-09  |
| Unigene32807  | Potri.008G178200.1 | 2.0345  | 12.908   | -2.6655 | Down | 2.80E-51  | 2.80E-50  |
| Unigene20139  | Potri.006G092600.1 | 2.6054  | 16.5299  | -2.6655 | Down | 3.91E-109 | 9.33E-108 |
| Unigene46146  | Potri.006G220100.1 | 0.8268  | 5.2459   | -2.6656 | Down | 1.08E-09  | 3.02E-09  |
| Unigene118862 | Potri.002G077500.1 | 0.6608  | 4.1926   | -2.6656 | Down | 1.08E-09  | 3.02E-09  |
| Unigene22682  | Potri.004G208100.2 | 5.2939  | 33.6017  | -2.6661 | Down | 1.93E-162 | 7.69E-161 |
| Unigene79210  | Potri.011G081000.1 | 51.5384 | 327.1509 | -2.6662 | Down | 2.00E-307 | 1.82E-305 |
| Unigene67607  | Potri.007G065400.2 | 2.7792  | 17.65    | -2.6669 | Down | 4.91E-19  | 2.11E-18  |
| Unigene29800  | Potri.004G026000.1 | 3.3587  | 21.3305  | -2.6669 | Down | 4.91E-19  | 2.11E-18  |
| Unigene32628  | Potri.003G174900.1 | 1.5986  | 10.1539  | -2.6672 | Down | 7.64E-46  | 6.83E-45  |
| Unigene50361  | Potri.002G033100.1 | 3.5736  | 22.6994  | -2.6672 | Down | 7.64E-46  | 6.83E-45  |
| Unigene42069  | Potri.019G092100.1 | 2.9094  | 18.4852  | -2.6676 | Down | 1.47E-37  | 1.09E-36  |
| Unigene52806  | Potri.010G142900.1 | 47.912  | 304.4996 | -2.668  | Down | 0         | 0         |
| Unigene94780  | Potri.006G007100.1 | 2.5761  | 16.3726  | -2.668  | Down | 2.83E-111 | 6.95E-110 |
| Unigene35056  | Potri.017G116200.1 | 6.4117  | 40.7558  | -2.6682 | Down | 2.18E-213 | 1.22E-211 |
| Unigene47310  | Potri.016G108400.1 | 1.0749  | 6.8326   | -2.6682 | Down | 1.17E-10  | 3.46E-10  |
| Unigene116805 | Potri.015G033700.1 | 1.1201  | 7.1199   | -2.6682 | Down | 1.17E-10  | 3.46E-10  |

|               |                     |         |          |         |      |           |           |
|---------------|---------------------|---------|----------|---------|------|-----------|-----------|
| Unigene47016  | Potri.010G119500.1  | 1.8557  | 11.7957  | -2.6682 | Down | 1.17E-10  | 3.46E-10  |
| Unigene118478 | Potri.006G217500.1  | 0.8363  | 5.316    | -2.6682 | Down | 1.17E-10  | 3.46E-10  |
| Unigene15956  | Potri.005G165600.1  | 0.9739  | 6.1904   | -2.6682 | Down | 1.17E-10  | 3.46E-10  |
| Unigene34228  | Potri.004G171300.1  | 2.2855  | 14.5277  | -2.6682 | Down | 9.71E-48  | 9.06E-47  |
| Unigene16480  | Potri.003G131300.4  | 3.693   | 23.4745  | -2.6682 | Down | 2.92E-29  | 1.74E-28  |
| Unigene18803  | Potri.001G296800.2  | 3.499   | 22.2413  | -2.6682 | Down | 9.71E-48  | 9.06E-47  |
| Unigene88660  | Potri.003G220900.1  | 38.2927 | 243.4891 | -2.6687 | Down | 0         | 0         |
| Unigene69319  | Potri.006G235500.1  | 6.0312  | 38.3557  | -2.6689 | Down | 1.20E-96  | 2.45E-95  |
| Unigene54007  | Potri.001G200400.1  | 16.9973 | 108.0931 | -2.6689 | Down | 2.11E-134 | 6.57E-133 |
| Unigene25057  | Potri.002G107700.10 | 2.5267  | 16.0741  | -2.6694 | Down | 6.07E-21  | 2.78E-20  |
| Unigene10940  | Potri.004G133900.2  | 3.1119  | 19.8014  | -2.6697 | Down | 4.40E-198 | 2.26E-196 |
| Unigene87858  | Potri.009G060800.1  | 20.2087 | 128.6424 | -2.6703 | Down | 3.44E-163 | 1.38E-161 |
| Unigene97058  | Potri.004G130300.1  | 0.6322  | 4.0247   | -2.6704 | Down | 1.27E-11  | 3.95E-11  |
| Unigene53943  | Potri.018G085600.2  | 1.7685  | 11.2588  | -2.6705 | Down | 1.27E-11  | 3.95E-11  |
| Unigene105193 | Potri.007G049900.1  | 1.0547  | 6.7148   | -2.6705 | Down | 1.27E-11  | 3.95E-11  |
| Unigene41500  | Potri.002G202600.1  | 1.0912  | 6.9469   | -2.6705 | Down | 6.75E-22  | 3.20E-21  |
| Unigene114682 | Potri.001G093300.1  | 1.4974  | 9.533    | -2.6705 | Down | 1.27E-11  | 3.95E-11  |
| Unigene34908  | Potri.014G032800.1  | 2.2802  | 14.5195  | -2.6708 | Down | 1.37E-63  | 1.73E-62  |
| Unigene18834  | Potri.005G211400.2  | 10.303  | 65.6171  | -2.671  | Down | 1.07E-74  | 1.62E-73  |
| Unigene109845 | Potri.014G149800.2  | 3.9353  | 25.0697  | -2.6714 | Down | 7.52E-23  | 3.67E-22  |
| Unigene50509  | Potri.008G147100.4  | 2.3504  | 14.9731  | -2.6714 | Down | 1.75E-65  | 2.29E-64  |
| Unigene11544  | Potri.015G066600.3  | 2.5759  | 16.4106  | -2.6715 | Down | 4.38E-119 | 1.17E-117 |
| Unigene43037  | Potri.011G169100.1  | 10.3456 | 65.917   | -2.6716 | Down | 0         | 0         |
| Unigene18953  | Potri.005G034100.1  | 3.3711  | 21.479   | -2.6716 | Down | 1.09E-87  | 1.98E-86  |
| Unigene36326  | Potri.006G054800.1  | 0.6711  | 4.2776   | -2.6722 | Down | 1.39E-12  | 4.53E-12  |
| Unigene24316  | Potri.001G076600.1  | 3.2028  | 20.4161  | -2.6723 | Down | 4.29E-46  | 3.86E-45  |
| Unigene40821  | Potri.002G188700.4  | 4.9908  | 31.8369  | -2.6734 | Down | 7.37E-37  | 5.36E-36  |
| Unigene106890 | Potri.012G041300.3  | 0.7571  | 4.83     | -2.6735 | Down | 7.37E-37  | 5.36E-36  |
| Unigene34151  | Potri.010G251700.8  | 6.6918  | 42.6929  | -2.6735 | Down | 3.05E-108 | 7.19E-107 |
| Unigene33785  | Potri.T034200.1     | 1.4389  | 9.1818   | -2.6738 | Down | 1.05E-25  | 5.59E-25  |
| Unigene113276 | Potri.005G005800.1  | 1.9242  | 12.2788  | -2.6738 | Down | 1.52E-13  | 5.20E-13  |
| Unigene113736 | Potri.002G032900.1  | 1.8722  | 11.947   | -2.6738 | Down | 1.52E-13  | 5.20E-13  |
| Unigene52279  | Potri.009G111400.4  | 3.0885  | 19.7087  | -2.6739 | Down | 1.05E-25  | 5.59E-25  |
| Unigene25365  | Potri.003G198200.1  | 4.8599  | 31.0225  | -2.6743 | Down | 6.80E-76  | 1.05E-74  |
| Unigene80794  | Potri.008G039000.1  | 2.0888  | 13.3415  | -2.6752 | Down | 1.67E-14  | 5.95E-14  |
| Unigene96668  | Potri.005G195300.1  | 1.3888  | 8.8707   | -2.6752 | Down | 1.67E-14  | 5.95E-14  |
| Unigene4483   | Potri.001G022700.2  | 2.2508  | 14.3766  | -2.6752 | Down | 1.67E-14  | 5.95E-14  |
| Unigene50285  | Potri.005G040500.1  | 2.7051  | 17.2809  | -2.6754 | Down | 1.26E-67  | 1.70E-66  |
| Unigene32664  | Potri.004G058500.1  | 2.7489  | 17.5651  | -2.6758 | Down | 3.03E-163 | 1.22E-161 |

|               |                    |         |          |         |      |           |           |
|---------------|--------------------|---------|----------|---------|------|-----------|-----------|
| Unigene79     | Potri.003G204000.3 | 2.7752  | 17.7375  | -2.6761 | Down | 1.16E-235 | 7.35E-234 |
| Unigene30660  | Potri.010G083300.4 | 14.0664 | 89.9059  | -2.6762 | Down | 2.08E-84  | 3.63E-83  |
| Unigene85478  | Potri.015G139800.1 | 15.4877 | 99.003   | -2.6763 | Down | 3.22E-113 | 8.04E-112 |
| Unigene102322 | Potri.002G042600.5 | 1.4273  | 9.1237   | -2.6763 | Down | 1.84E-15  | 6.83E-15  |
| Unigene5439   | Potri.008G043000.2 | 1.7594  | 11.2468  | -2.6764 | Down | 1.84E-15  | 6.83E-15  |
| Unigene103093 | Potri.005G076600.1 | 0.9613  | 6.1452   | -2.6764 | Down | 1.84E-15  | 6.83E-15  |
| Unigene6470   | Potri.012G141900.1 | 2.534   | 16.2017  | -2.6767 | Down | 3.52E-101 | 7.65E-100 |
| Unigene3070   | Potri.010G102600.2 | 7.6449  | 48.8865  | -2.6769 | Down | 5.33E-117 | 1.39E-115 |
| Unigene16189  | Potri.009G111400.4 | 2.1858  | 13.9775  | -2.6769 | Down | 1.84E-30  | 1.13E-29  |
| Unigene21621  | Potri.002G000800.1 | 17.6226 | 112.7053 | -2.6771 | Down | 0         | 0         |
| Unigene43389  | Potri.010G209300.1 | 10.1961 | 65.2141  | -2.6772 | Down | 1.25E-148 | 4.44E-147 |
| Unigene20441  | Potri.015G017500.1 | 1.7501  | 11.1953  | -2.6774 | Down | 2.03E-16  | 7.86E-16  |
| Unigene118210 | Potri.013G148300.1 | 1.4346  | 9.1769   | -2.6774 | Down | 2.03E-16  | 7.86E-16  |
| Unigene118392 | Potri.009G070200.1 | 1.3688  | 8.756    | -2.6774 | Down | 2.03E-16  | 7.86E-16  |
| Unigene90536  | Potri.008G131700.2 | 18.6498 | 119.3063 | -2.6774 | Down | 3.42E-181 | 1.57E-179 |
| Unigene10050  | Potri.002G253500.1 | 1.9318  | 12.3587  | -2.6775 | Down | 4.33E-77  | 6.80E-76  |
| Unigene66700  | Potri.009G148600.1 | 2.5776  | 16.4988  | -2.6783 | Down | 2.24E-17  | 9.03E-17  |
| Unigene14871  | Potri.003G008400.2 | 3.0339  | 19.4196  | -2.6783 | Down | 2.24E-17  | 9.03E-17  |
| Unigene75845  | Potri.002G180800.5 | 5.6869  | 36.4009  | -2.6783 | Down | 2.60E-33  | 1.73E-32  |
| Unigene19010  | Potri.005G055900.1 | 6.0697  | 38.8668  | -2.6788 | Down | 3.00E-117 | 7.83E-116 |
| Unigene119292 | Potri.004G159800.1 | 1.0081  | 6.4562   | -2.679  | Down | 2.48E-18  | 1.04E-17  |
| Unigene40203  | Potri.015G013700.1 | 3.9485  | 25.2962  | -2.6795 | Down | 6.33E-54  | 6.69E-53  |
| Unigene43798  | Potri.006G251800.2 | 4.4854  | 28.7401  | -2.6798 | Down | 4.14E-37  | 3.03E-36  |
| Unigene4673   | Potri.001G098700.3 | 2.0722  | 13.2776  | -2.6798 | Down | 4.14E-37  | 3.03E-36  |
| Unigene36432  | Potri.010G015500.1 | 0.979   | 6.2756   | -2.6804 | Down | 3.06E-20  | 1.37E-19  |
| Unigene56092  | Potri.006G150900.1 | 2.3682  | 15.1811  | -2.6804 | Down | 3.06E-20  | 1.37E-19  |
| Unigene46846  | Potri.018G145800.4 | 10.1046 | 64.7802  | -2.6805 | Down | 2.43E-77  | 3.84E-76  |
| Unigene68362  | Potri.003G069600.5 | 1.5034  | 9.6414   | -2.681  | Down | 3.40E-21  | 1.58E-20  |
| Unigene118248 | Potri.001G032800.1 | 1.8605  | 11.9315  | -2.681  | Down | 3.40E-21  | 1.58E-20  |
| Unigene20181  | Potri.009G041900.1 | 4.2207  | 27.0721  | -2.6813 | Down | 7.46E-42  | 6.11E-41  |
| Unigene111635 | Potri.010G085900.2 | 3.4919  | 22.4011  | -2.6815 | Down | 3.79E-22  | 1.81E-21  |
| Unigene17552  | Potri.002G160200.1 | 11.514  | 73.8669  | -2.6815 | Down | 3.11E-290 | 2.65E-288 |
| Unigene52259  | Potri.001G003800.1 | 16.4118 | 105.2852 | -2.6815 | Down | 1.34E-145 | 4.60E-144 |
| Unigene44226  | Potri.005G137900.1 | 1.1418  | 7.3297   | -2.6824 | Down | 4.71E-24  | 2.39E-23  |
| Unigene101421 | Potri.002G038700.2 | 1.7727  | 11.3792  | -2.6824 | Down | 4.71E-24  | 2.39E-23  |
| Unigene21194  | Potri.008G203400.6 | 7.8099  | 50.1434  | -2.6827 | Down | 0         | 0         |
| Unigene47933  | Potri.003G103000.2 | 1.7762  | 11.4049  | -2.6828 | Down | 5.26E-25  | 2.75E-24  |
| Unigene83336  | Potri.019G079300.1 | 21.155  | 135.85   | -2.6829 | Down | 5.83E-144 | 1.97E-142 |
| Unigene17476  | Potri.018G090300.1 | 6.9822  | 44.8372  | -2.6829 | Down | 7.35E-73  | 1.08E-71  |

|               |                    |         |          |         |      |           |           |
|---------------|--------------------|---------|----------|---------|------|-----------|-----------|
| Unigene37628  | Potri.012G006300.2 | 3.9909  | 25.6325  | -2.6832 | Down | 5.87E-26  | 3.16E-25  |
| Unigene49376  | Potri.002G057600.3 | 14.1445 | 90.8682  | -2.6835 | Down | 3.80E-128 | 1.11E-126 |
| Unigene38835  | Potri.T093000.1    | 8.1448  | 52.3505  | -2.6843 | Down | 3.26E-84  | 5.67E-83  |
| Unigene115556 | Potri.007G140500.1 | 3.8321  | 24.6341  | -2.6844 | Down | 9.21E-30  | 5.55E-29  |
| Unigene1953   | Potri.001G454500.1 | 4.0079  | 25.7687  | -2.6847 | Down | 7.38E-60  | 8.76E-59  |
| Unigene45573  | Potri.010G200400.1 | 2.1068  | 13.5464  | -2.6848 | Down | 6.03E-119 | 1.61E-117 |
| Unigene65446  | Potri.005G157200.1 | 4.8815  | 31.42    | -2.6863 | Down | 2.61E-38  | 1.97E-37  |
| Unigene104588 | Potri.015G089000.1 | 2.0271  | 13.0493  | -2.6865 | Down | 6.78E-77  | 1.06E-75  |
| Unigene2416   | Potri.010G192400.1 | 5.249   | 33.8018  | -2.687  | Down | 8.20E-126 | 2.34E-124 |
| Unigene52482  | Potri.003G131800.1 | 7.7559  | 49.9445  | -2.687  | Down | 7.23E-125 | 2.04E-123 |
| Unigene8731   | Potri.001G124000.2 | 10.3544 | 66.6796  | -2.687  | Down | 1.83E-84  | 3.20E-83  |
| Unigene21807  | Potri.004G089800.2 | 12.2789 | 79.1074  | -2.6876 | Down | 0         | 0         |
| Unigene43396  | Potri.004G180500.3 | 1.7307  | 11.1595  | -2.6888 | Down | 7.65E-65  | 9.89E-64  |
| Unigene23496  | Potri.010G052200.1 | 3.6666  | 23.6527  | -2.6895 | Down | 4.31E-78  | 6.87E-77  |
| Unigene27295  | Potri.001G088600.1 | 5.7927  | 37.3692  | -2.6895 | Down | 4.88E-79  | 7.89E-78  |
| Unigene32954  | Potri.006G242100.1 | 4.1994  | 27.0995  | -2.69   | Down | 1.39E-185 | 6.59E-184 |
| Unigene23555  | Potri.013G154800.1 | 6.1199  | 39.5031  | -2.6904 | Down | 3.43E-111 | 8.41E-110 |
| Unigene41017  | Potri.006G006000.1 | 20.6171 | 133.1029 | -2.6906 | Down | 2.28E-125 | 6.46E-124 |
| Unigene34050  | Potri.014G135100.1 | 10.081  | 65.1013  | -2.691  | Down | 3.21E-162 | 1.28E-160 |
| Unigene32195  | Potri.012G088900.1 | 2.4311  | 15.6999  | -2.6911 | Down | 6.07E-167 | 2.51E-165 |
| Unigene32688  | Potri.004G072200.1 | 11.2474 | 72.6772  | -2.6919 | Down | 0         | 0         |
| Unigene109932 | Potri.018G104000.1 | 0.511   | 3.3029   | -2.6923 | Down | 4.59E-04  | 8.16E-04  |
| Unigene109924 | Potri.008G121500.1 | 0.511   | 3.3029   | -2.6923 | Down | 4.59E-04  | 8.16E-04  |
| Unigene97777  | Potri.005G193100.1 | 0.5375  | 3.4742   | -2.6923 | Down | 4.72E-06  | 1.03E-05  |
| Unigene109445 | Potri.003G188600.1 | 0.5205  | 3.3643   | -2.6923 | Down | 4.59E-04  | 8.16E-04  |
| Unigene111514 | Potri.001G065800.4 | 0.4803  | 3.1044   | -2.6923 | Down | 4.59E-04  | 8.16E-04  |
| Unigene5219   | Potri.T160900.1    | 0.7707  | 4.9816   | -2.6924 | Down | 4.72E-06  | 1.03E-05  |
| Unigene9700   | Potri.T107700.1    | 0.6557  | 4.2383   | -2.6924 | Down | 6.03E-10  | 1.71E-09  |
| Unigene106208 | Potri.019G086200.1 | 0.6487  | 4.1932   | -2.6924 | Down | 6.53E-11  | 1.96E-10  |
| Unigene20323  | Potri.018G146900.2 | 1.6268  | 10.5158  | -2.6924 | Down | 9.34E-15  | 3.37E-14  |
| Unigene98386  | Potri.017G000800.1 | 0.8881  | 5.7407   | -2.6924 | Down | 6.03E-10  | 1.71E-09  |
| Unigene98980  | Potri.016G022900.1 | 0.5609  | 3.6257   | -2.6924 | Down | 4.59E-05  | 9.12E-05  |
| Unigene119266 | Potri.014G173700.2 | 0.6293  | 4.0678   | -2.6924 | Down | 7.10E-12  | 2.24E-11  |
| Unigene119302 | Potri.013G127100.2 | 0.6661  | 4.3056   | -2.6924 | Down | 7.75E-13  | 2.56E-12  |
| Unigene6326   | Potri.013G053500.1 | 1.4439  | 9.3333   | -2.6924 | Down | 7.75E-13  | 2.56E-12  |
| Unigene102977 | Potri.013G048300.2 | 1.1111  | 7.182    | -2.6924 | Down | 5.23E-08  | 1.32E-07  |
| Unigene21180  | Potri.012G137500.2 | 0.6481  | 4.1892   | -2.6924 | Down | 6.03E-10  | 1.71E-09  |
| Unigene107631 | Potri.012G064100.3 | 0.554   | 3.5809   | -2.6924 | Down | 4.59E-04  | 8.16E-04  |
| Unigene37049  | Potri.012G034600.1 | 0.5451  | 3.5235   | -2.6924 | Down | 5.23E-08  | 1.32E-07  |

|               |                    |        |         |         |      |          |          |
|---------------|--------------------|--------|---------|---------|------|----------|----------|
| Unigene112107 | Potri.010G201700.1 | 0.6243 | 4.0353  | -2.6924 | Down | 4.59E-05 | 9.13E-05 |
| Unigene100878 | Potri.010G188200.1 | 0.5133 | 3.318   | -2.6924 | Down | 4.59E-04 | 8.16E-04 |
| Unigene5371   | Potri.010G121500.2 | 2.5432 | 16.4394 | -2.6924 | Down | 1.91E-21 | 8.90E-21 |
| Unigene114188 | Potri.010G097700.1 | 0.5609 | 3.6257  | -2.6924 | Down | 4.59E-05 | 9.12E-05 |
| Unigene94753  | Potri.007G130300.1 | 0.5432 | 3.5113  | -2.6924 | Down | 4.59E-04 | 8.16E-04 |
| Unigene110824 | Potri.007G096300.3 | 0.6602 | 4.2675  | -2.6924 | Down | 4.59E-05 | 9.13E-05 |
| Unigene107284 | Potri.007G065600.1 | 1.119  | 7.2333  | -2.6924 | Down | 4.94E-07 | 1.17E-06 |
| Unigene21296  | Potri.007G041300.1 | 1.5287 | 9.8816  | -2.6924 | Down | 1.71E-20 | 7.75E-20 |
| Unigene109032 | Potri.006G199800.7 | 0.8839 | 5.7135  | -2.6924 | Down | 4.72E-06 | 1.03E-05 |
| Unigene85709  | Potri.006G110000.1 | 0.8942 | 5.7801  | -2.6924 | Down | 5.23E-08 | 1.32E-07 |
| Unigene26001  | Potri.003G003800.1 | 0.486  | 3.1415  | -2.6924 | Down | 4.59E-05 | 9.12E-05 |
| Unigene108265 | Potri.002G253700.1 | 0.5432 | 3.5113  | -2.6924 | Down | 4.59E-04 | 8.16E-04 |
| Unigene17975  | Potri.002G193000.1 | 1.8085 | 11.6902 | -2.6924 | Down | 1.14E-16 | 4.44E-16 |
| Unigene95829  | Potri.002G165900.1 | 0.538  | 3.4776  | -2.6924 | Down | 4.59E-04 | 8.16E-04 |
| Unigene70968  | Potri.002G055400.2 | 2.0413 | 13.1951 | -2.6924 | Down | 7.10E-12 | 2.24E-11 |
| Unigene111223 | Potri.002G004100.3 | 0.8109 | 5.2415  | -2.6924 | Down | 4.72E-06 | 1.03E-05 |
| Unigene12497  | Potri.001G164900.1 | 1.916  | 12.3852 | -2.6924 | Down | 2.33E-60 | 2.78E-59 |
| Unigene118391 | Potri.001G161400.7 | 0.5133 | 3.318   | -2.6924 | Down | 4.94E-07 | 1.17E-06 |
| Unigene108614 | Potri.T106100.1    | 0.8966 | 5.7959  | -2.6925 | Down | 4.72E-06 | 1.03E-05 |
| Unigene15990  | Potri.T051500.1    | 9.2785 | 59.9779 | -2.6925 | Down | 5.42E-49 | 5.18E-48 |
| Unigene30476  | Potri.019G093000.1 | 1.2103 | 7.8237  | -2.6925 | Down | 7.10E-12 | 2.24E-11 |
| Unigene99784  | Potri.018G003600.1 | 1.4055 | 9.0854  | -2.6925 | Down | 8.50E-14 | 2.94E-13 |
| Unigene82867  | Potri.017G118200.1 | 0.7064 | 4.5665  | -2.6925 | Down | 4.72E-06 | 1.03E-05 |
| Unigene26390  | Potri.017G017200.1 | 0.7071 | 4.5708  | -2.6925 | Down | 4.59E-05 | 9.12E-05 |
| Unigene114861 | Potri.017G002100.1 | 1.0772 | 6.9635  | -2.6925 | Down | 5.60E-09 | 1.50E-08 |
| Unigene41656  | Potri.016G116300.2 | 3.0538 | 19.7401 | -2.6925 | Down | 4.12E-28 | 2.37E-27 |
| Unigene33973  | Potri.015G080500.1 | 1.0441 | 6.7493  | -2.6925 | Down | 4.61E-29 | 2.73E-28 |
| Unigene108244 | Potri.014G115200.2 | 0.9053 | 5.8522  | -2.6925 | Down | 4.72E-06 | 1.03E-05 |
| Unigene60794  | Potri.014G106000.2 | 8.8737 | 57.3611 | -2.6925 | Down | 1.61E-57 | 1.83E-56 |
| Unigene113059 | Potri.014G079700.2 | 1.1936 | 7.7156  | -2.6925 | Down | 5.60E-09 | 1.50E-08 |
| Unigene101413 | Potri.014G013100.1 | 0.7894 | 5.1029  | -2.6925 | Down | 7.75E-13 | 2.56E-12 |
| Unigene106886 | Potri.013G126600.2 | 0.6979 | 4.5114  | -2.6925 | Down | 1.39E-18 | 5.87E-18 |
| Unigene19641  | Potri.013G091300.1 | 1.2509 | 8.086   | -2.6925 | Down | 7.10E-12 | 2.24E-11 |
| Unigene47757  | Potri.012G021800.5 | 2.2553 | 14.5788 | -2.6925 | Down | 8.50E-14 | 2.94E-13 |
| Unigene118634 | Potri.011G135300.1 | 0.5615 | 3.6296  | -2.6925 | Down | 5.23E-08 | 1.32E-07 |
| Unigene1819   | Potri.010G219600.5 | 4.2179 | 27.2654 | -2.6925 | Down | 6.12E-50 | 5.96E-49 |
| Unigene37231  | Potri.010G098400.1 | 0.8674 | 5.6072  | -2.6925 | Down | 4.94E-07 | 1.17E-06 |
| Unigene52315  | Potri.010G052200.1 | 4.7173 | 30.4935 | -2.6925 | Down | 2.35E-42 | 1.95E-41 |
| Unigene107500 | Potri.009G060700.3 | 0.5567 | 3.5987  | -2.6925 | Down | 4.59E-04 | 8.16E-04 |



|               |                    |         |          |         |      |           |           |
|---------------|--------------------|---------|----------|---------|------|-----------|-----------|
| Unigene24448  | Potri.009G050900.1 | 1.8916  | 12.2275  | -2.6925 | Down | 6.49E-32  | 4.16E-31  |
| Unigene94596  | Potri.008G119000.1 | 1.892   | 12.2303  | -2.6925 | Down | 9.34E-15  | 3.37E-14  |
| Unigene29963  | Potri.008G056600.3 | 0.8041  | 5.1981   | -2.6925 | Down | 8.50E-14  | 2.94E-13  |
| Unigene98165  | Potri.008G023800.1 | 0.4973  | 3.2148   | -2.6925 | Down | 4.59E-05  | 9.12E-05  |
| Unigene115063 | Potri.008G004600.1 | 0.6613  | 4.275    | -2.6925 | Down | 4.72E-06  | 1.03E-05  |
| Unigene80973  | Potri.007G140500.1 | 16.8736 | 109.0741 | -2.6925 | Down | 1.50E-109 | 3.59E-108 |
| Unigene99070  | Potri.007G135000.1 | 0.6498  | 4.2005   | -2.6925 | Down | 4.72E-06  | 1.03E-05  |
| Unigene36399  | Potri.007G005100.1 | 0.7908  | 5.1119   | -2.6925 | Down | 4.94E-07  | 1.17E-06  |
| Unigene4064   | Potri.006G275000.5 | 1.2644  | 8.1733   | -2.6925 | Down | 5.60E-09  | 1.50E-08  |
| Unigene20353  | Potri.006G175200.1 | 1.9409  | 12.5465  | -2.6925 | Down | 2.36E-23  | 1.17E-22  |
| Unigene43443  | Potri.006G132600.1 | 4.6677  | 30.1729  | -2.6925 | Down | 1.03E-106 | 2.38E-105 |
| Unigene58658  | Potri.006G104000.3 | 1.647   | 10.6465  | -2.6925 | Down | 8.17E-34  | 5.49E-33  |
| Unigene78552  | Potri.006G051100.1 | 12.9053 | 83.4225  | -2.6925 | Down | 2.74E-79  | 4.45E-78  |
| Unigene105324 | Potri.006G046000.1 | 0.4895  | 3.1642   | -2.6925 | Down | 4.72E-06  | 1.03E-05  |
| Unigene29908  | Potri.006G012000.2 | 1.7715  | 11.4512  | -2.6925 | Down | 1.39E-18  | 5.87E-18  |
| Unigene21801  | Potri.005G259300.1 | 8.4784  | 54.8062  | -2.6925 | Down | 4.49E-288 | 3.79E-286 |
| Unigene25501  | Potri.005G237100.2 | 1.0725  | 6.9329   | -2.6925 | Down | 6.03E-10  | 1.71E-09  |
| Unigene105911 | Potri.005G128900.1 | 2.5306  | 16.3586  | -2.6925 | Down | 2.36E-23  | 1.17E-22  |
| Unigene73407  | Potri.005G122000.1 | 0.7071  | 4.5708   | -2.6925 | Down | 4.59E-05  | 9.12E-05  |
| Unigene53713  | Potri.005G000600.4 | 2.3682  | 15.3086  | -2.6925 | Down | 1.14E-16  | 4.44E-16  |
| Unigene81789  | Potri.004G162000.1 | 6.2408  | 40.3416  | -2.6925 | Down | 2.35E-42  | 1.95E-41  |
| Unigene113958 | Potri.004G104300.4 | 0.7118  | 4.6014   | -2.6925 | Down | 4.72E-06  | 1.03E-05  |
| Unigene100553 | Potri.003G221500.2 | 0.923   | 5.9664   | -2.6925 | Down | 1.26E-17  | 5.11E-17  |
| Unigene107774 | Potri.003G100800.2 | 0.5512  | 3.5632   | -2.6925 | Down | 4.59E-04  | 8.16E-04  |
| Unigene100781 | Potri.002G028100.2 | 0.4844  | 3.1313   | -2.6925 | Down | 4.72E-06  | 1.03E-05  |
| Unigene111336 | Potri.001G314700.2 | 0.4823  | 3.1178   | -2.6925 | Down | 4.59E-04  | 8.16E-04  |
| Unigene63961  | Potri.001G108700.3 | 0.6016  | 3.8889   | -2.6925 | Down | 4.59E-05  | 9.12E-05  |
| Unigene25942  | Potri.001G088600.1 | 1.5672  | 10.1307  | -2.6925 | Down | 6.53E-11  | 1.96E-10  |
| Unigene48183  | Potri.001G056700.9 | 0.5465  | 3.5328   | -2.6925 | Down | 4.59E-05  | 9.12E-05  |
| Unigene111781 | Potri.015G049600.1 | 0.4741  | 3.065    | -2.6926 | Down | 4.59E-04  | 8.16E-04  |
| Unigene110571 | Potri.013G119600.2 | 0.4995  | 3.2292   | -2.6926 | Down | 4.59E-04  | 8.16E-04  |
| Unigene101158 | Potri.013G079600.2 | 0.553   | 3.575    | -2.6926 | Down | 1.39E-18  | 5.87E-18  |
| Unigene105077 | Potri.010G054500.1 | 0.4797  | 3.1011   | -2.6926 | Down | 5.60E-09  | 1.50E-08  |
| Unigene14667  | Potri.008G041400.1 | 0.518   | 3.3488   | -2.6926 | Down | 4.59E-05  | 9.12E-05  |
| Unigene110778 | Potri.008G032000.1 | 0.4951  | 3.2006   | -2.6926 | Down | 4.59E-04  | 8.16E-04  |
| Unigene97104  | Potri.002G207800.1 | 0.5634  | 3.6422   | -2.6926 | Down | 4.72E-06  | 1.03E-05  |
| Unigene103489 | Potri.002G106200.1 | 0.5651  | 3.6532   | -2.6926 | Down | 6.53E-11  | 1.96E-10  |
| Unigene99700  | Potri.001G382700.1 | 0.5458  | 3.5285   | -2.6926 | Down | 6.03E-10  | 1.71E-09  |
| Unigene93583  | Potri.011G091200.1 | 63.6323 | 411.5312 | -2.6932 | Down | 0         | 0         |

|               |                    |         |          |         |      |           |           |
|---------------|--------------------|---------|----------|---------|------|-----------|-----------|
| Unigene10963  | Potri.007G140500.1 | 12.9407 | 83.7139  | -2.6936 | Down | 0         | 0         |
| Unigene24437  | Potri.001G091400.1 | 6.7938  | 43.9645  | -2.694  | Down | 1.17E-146 | 4.06E-145 |
| Unigene31474  | Potri.010G002500.7 | 18.5194 | 119.8999 | -2.6947 | Down | 1.37E-203 | 7.27E-202 |
| Unigene32747  | Potri.007G112800.1 | 3.5885  | 23.2338  | -2.6948 | Down | 7.24E-199 | 3.75E-197 |
| Unigene74215  | Potri.003G094000.1 | 17.5221 | 113.4531 | -2.6948 | Down | 1.64E-97  | 3.40E-96  |
| Unigene25759  | Potri.001G257000.4 | 10.6101 | 68.7037  | -2.6949 | Down | 9.96E-94  | 1.96E-92  |
| Unigene23513  | Potri.001G020300.1 | 9.3529  | 60.5795  | -2.6953 | Down | 3.88E-160 | 1.51E-158 |
| Unigene43997  | Potri.013G076800.1 | 4.9814  | 32.266   | -2.6954 | Down | 1.54E-79  | 2.50E-78  |
| Unigene10874  | Potri.005G216300.1 | 2.8352  | 18.367   | -2.6956 | Down | 7.43E-148 | 2.61E-146 |
| Unigene36003  | Potri.004G173900.1 | 12.599  | 81.6206  | -2.6956 | Down | 7.30E-74  | 1.09E-72  |
| Unigene9539   | Potri.007G104500.1 | 19.2848 | 124.9846 | -2.6962 | Down | 0         | 0         |
| Unigene10723  | Potri.014G070600.1 | 2.9552  | 19.1604  | -2.6968 | Down | 3.24E-107 | 7.53E-106 |
| Unigene299    | Potri.006G078500.1 | 3.8686  | 25.0863  | -2.697  | Down | 7.87E-153 | 2.90E-151 |
| Unigene102154 | Potri.002G051800.3 | 1.593   | 10.3296  | -2.697  | Down | 4.37E-52  | 4.45E-51  |
| Unigene65037  | Potri.017G110600.1 | 9.1691  | 59.4626  | -2.6971 | Down | 1.18E-99  | 2.53E-98  |
| Unigene46454  | Potri.012G088500.1 | 14.9912 | 97.2905  | -2.6982 | Down | 1.10E-81  | 1.85E-80  |
| Unigene24064  | Potri.003G154600.1 | 8.7993  | 57.107   | -2.6982 | Down | 2.18E-280 | 1.75E-278 |
| Unigene21443  | Potri.002G102700.1 | 4.9246  | 31.9702  | -2.6986 | Down | 2.66E-149 | 9.47E-148 |
| Unigene66385  | Potri.007G043300.2 | 6.5572  | 42.5706  | -2.6987 | Down | 4.63E-75  | 7.05E-74  |
| Unigene9123   | Potri.014G154000.1 | 4.9638  | 32.2398  | -2.6993 | Down | 5.14E-35  | 3.56E-34  |
| Unigene15295  | Potri.013G003000.2 | 11.6043 | 75.3696  | -2.6993 | Down | 1.95E-68  | 2.68E-67  |
| Unigene42034  | Potri.001G100800.2 | 10.32   | 67.0283  | -2.6993 | Down | 1.95E-68  | 2.68E-67  |
| Unigene6210   | Potri.005G003500.1 | 1.3962  | 9.0685   | -2.6994 | Down | 5.14E-35  | 3.56E-34  |
| Unigene47369  | Potri.003G018900.1 | 8.0177  | 52.078   | -2.6994 | Down | 1.73E-67  | 2.33E-66  |
| Unigene37266  | Potri.004G228300.1 | 17.0799 | 110.9491 | -2.6995 | Down | 2.39E-131 | 7.20E-130 |
| Unigene31797  | Potri.010G083300.2 | 1.7101  | 11.1088  | -2.6996 | Down | 5.17E-98  | 1.08E-96  |
| Unigene10087  | Potri.016G040200.4 | 5.074   | 32.9661  | -2.6998 | Down | 1.27E-126 | 3.64E-125 |
| Unigene4575   | Potri.001G421300.1 | 11.9402 | 77.597   | -2.7002 | Down | 1.45E-209 | 7.94E-208 |
| Unigene94540  | Potri.002G230200.1 | 1.0948  | 7.1178   | -2.7008 | Down | 2.58E-29  | 1.54E-28  |
| Unigene39151  | Potri.010G154600.1 | 1.829   | 11.8937  | -2.7011 | Down | 2.31E-28  | 1.33E-27  |
| Unigene112139 | Potri.010G030200.1 | 4.1962  | 27.2925  | -2.7013 | Down | 2.06E-27  | 1.16E-26  |
| Unigene33888  | Potri.013G031100.2 | 1.603   | 10.4282  | -2.7016 | Down | 1.84E-26  | 1.01E-25  |
| Unigene7355   | Potri.008G202400.1 | 1.5012  | 9.7664   | -2.7017 | Down | 1.84E-26  | 1.01E-25  |
| Unigene14666  | Potri.003G102600.1 | 5.1519  | 33.5247  | -2.702  | Down | 1.70E-49  | 1.65E-48  |
| Unigene436    | Potri.003G219000.1 | 12.1668 | 79.1744  | -2.7021 | Down | 1.88E-263 | 1.39E-261 |
| Unigene51201  | Potri.002G040600.4 | 12.8834 | 83.8404  | -2.7021 | Down | 2.94E-120 | 7.93E-119 |
| Unigene80478  | Potri.006G144500.1 | 25.5682 | 166.4121 | -2.7023 | Down | 3.16E-164 | 1.28E-162 |
| Unigene107114 | Potri.003G223600.1 | 0.7619  | 4.959    | -2.7024 | Down | 1.48E-24  | 7.62E-24  |
| Unigene10272  | Potri.018G022700.6 | 26.7812 | 174.3393 | -2.7026 | Down | 0         | 0         |

|               |                    |         |          |         |      |           |           |
|---------------|--------------------|---------|----------|---------|------|-----------|-----------|
| Unigene88828  | Potri.010G247500.5 | 7.5474  | 49.1414  | -2.7029 | Down | 9.67E-68  | 1.31E-66  |
| Unigene31218  | Potri.009G112600.1 | 2.4441  | 15.9138  | -2.7029 | Down | 1.32E-23  | 6.63E-23  |
| Unigene70772  | Potri.001G301000.1 | 4.2681  | 27.7898  | -2.7029 | Down | 1.32E-23  | 6.63E-23  |
| Unigene104619 | Potri.015G000100.2 | 2.4569  | 16.0019  | -2.7033 | Down | 1.19E-22  | 5.76E-22  |
| Unigene119099 | Potri.003G146400.1 | 1.4246  | 9.2789   | -2.7034 | Down | 1.19E-22  | 5.76E-22  |
| Unigene105891 | Potri.001G416100.2 | 0.8168  | 5.3217   | -2.7038 | Down | 1.07E-21  | 5.02E-21  |
| Unigene42550  | Potri.007G056900.1 | 4.2431  | 27.6568  | -2.7044 | Down | 0.00E+00  | 1.84E-306 |
| Unigene24839  | Potri.010G247500.5 | 15.2677 | 99.5261  | -2.7046 | Down | 3.85E-153 | 1.42E-151 |
| Unigene29701  | Potri.014G187300.1 | 25.5046 | 166.2694 | -2.7047 | Down | 0         | 0         |
| Unigene35022  | Potri.001G100000.1 | 1.5219  | 9.924    | -2.705  | Down | 2.23E-56  | 2.48E-55  |
| Unigene15522  | Potri.018G114300.2 | 1.9154  | 12.49    | -2.7051 | Down | 8.63E-20  | 3.81E-19  |
| Unigene18652  | Potri.014G160300.1 | 1.1745  | 7.6608   | -2.7054 | Down | 3.64E-37  | 2.66E-36  |
| Unigene51800  | Potri.008G032700.2 | 1.0266  | 6.6975   | -2.7057 | Down | 7.78E-19  | 3.31E-18  |
| Unigene81281  | Potri.016G011400.1 | 13.2686 | 86.565   | -2.7058 | Down | 4.11E-88  | 7.51E-87  |
| Unigene29725  | Potri.014G039700.1 | 5.0576  | 33.0074  | -2.7063 | Down | 1.33E-101 | 2.90E-100 |
| Unigene106804 | Potri.006G168400.1 | 0.7733  | 5.0477   | -2.7065 | Down | 7.02E-18  | 2.89E-17  |
| Unigene95832  | Potri.017G009200.1 | 2.2974  | 14.9967  | -2.7066 | Down | 7.02E-18  | 2.89E-17  |
| Unigene7053   | Potri.004G133600.3 | 1.8065  | 11.7922  | -2.7066 | Down | 7.02E-18  | 2.89E-17  |
| Unigene31154  | Potri.002G008700.1 | 1.1049  | 7.2146   | -2.707  | Down | 2.28E-33  | 1.52E-32  |
| Unigene79282  | Potri.016G058300.1 | 15.1675 | 99.0457  | -2.7071 | Down | 6.26E-96  | 1.27E-94  |
| Unigene75949  | Potri.013G144100.1 | 2.6762  | 17.4797  | -2.7074 | Down | 6.35E-17  | 2.51E-16  |
| Unigene2073   | Potri.004G049100.1 | 9.0033  | 58.8055  | -2.7074 | Down | 2.03E-109 | 4.87E-108 |
| Unigene26662  | Potri.014G175200.5 | 30.2591 | 197.6983 | -2.7079 | Down | 5.82E-196 | 2.96E-194 |
| Unigene52828  | Potri.002G068700.1 | 21.2592 | 138.9118 | -2.708  | Down | 4.82E-268 | 3.66E-266 |
| Unigene1411   | Potri.005G191900.1 | 9.8325  | 64.2503  | -2.7081 | Down | 1.04E-178 | 4.70E-177 |
| Unigene22635  | Potri.002G008800.3 | 5.0179  | 32.7969  | -2.7084 | Down | 1.80E-59  | 2.12E-58  |
| Unigene51103  | Potri.001G328000.1 | 0.9024  | 5.8982   | -2.7084 | Down | 5.75E-16  | 2.18E-15  |
| Unigene36320  | Potri.017G017300.1 | 6.2876  | 41.1037  | -2.7087 | Down | 1.59E-58  | 1.84E-57  |
| Unigene29546  | Potri.013G026500.5 | 1.6875  | 11.0337  | -2.709  | Down | 1.44E-29  | 8.67E-29  |
| Unigene7543   | Potri.008G120000.2 | 2.8847  | 18.8639  | -2.7091 | Down | 4.13E-43  | 3.48E-42  |
| Unigene79587  | Potri.005G141600.2 | 26.2478 | 171.6553 | -2.7092 | Down | 1.99E-166 | 8.19E-165 |
| Unigene57528  | Potri.T041700.2    | 5.615   | 36.7284  | -2.7095 | Down | 3.67E-42  | 3.03E-41  |
| Unigene36291  | Potri.012G042200.6 | 1.3088  | 8.5608   | -2.7095 | Down | 5.22E-15  | 1.90E-14  |
| Unigene542    | Potri.005G125800.1 | 2.6139  | 17.0977  | -2.7095 | Down | 3.73E-123 | 1.04E-121 |
| Unigene16581  | Potri.018G050300.1 | 1.8387  | 12.0273  | -2.7096 | Down | 5.22E-15  | 1.90E-14  |
| Unigene35248  | Potri.001G317600.1 | 1.0199  | 6.6714   | -2.7096 | Down | 5.22E-15  | 1.90E-14  |
| Unigene44146  | Potri.018G092600.1 | 1.266   | 8.2832   | -2.7099 | Down | 3.26E-41  | 2.63E-40  |
| Unigene7316   | Potri.004G047100.1 | 4.1332  | 27.0436  | -2.71   | Down | 3.26E-41  | 2.63E-40  |
| Unigene93381  | Potri.001G100800.2 | 39.7906 | 260.3917 | -2.7102 | Down | 0         | 0         |

|               |                    |         |          |         |      |           |           |
|---------------|--------------------|---------|----------|---------|------|-----------|-----------|
| Unigene6434   | Potri.008G088500.1 | 10.3018 | 67.4346  | -2.7106 | Down | 1.30E-141 | 4.31E-140 |
| Unigene106037 | Potri.011G071900.1 | 1.5642  | 10.2407  | -2.7108 | Down | 4.74E-14  | 1.66E-13  |
| Unigene2317   | Potri.004G136800.1 | 6.4341  | 42.1242  | -2.7108 | Down | 1.01E-139 | 3.29E-138 |
| Unigene32697  | Potri.003G048800.1 | 1.4189  | 9.2893   | -2.7108 | Down | 6.81E-52  | 6.91E-51  |
| Unigene36572  | Potri.015G095000.3 | 7.0787  | 46.345   | -2.7109 | Down | 6.81E-52  | 6.91E-51  |
| Unigene119031 | Potri.007G076200.5 | 0.8768  | 5.7407   | -2.7109 | Down | 4.74E-14  | 1.66E-13  |
| Unigene45879  | Potri.002G079400.2 | 2.3945  | 15.6772  | -2.7109 | Down | 1.03E-26  | 5.69E-26  |
| Unigene2535   | Potri.002G260600.1 | 2.6335  | 17.2461  | -2.7112 | Down | 2.01E-149 | 7.18E-148 |
| Unigene57201  | Potri.014G159300.4 | 7.8392  | 51.3553  | -2.7117 | Down | 1.29E-61  | 1.57E-60  |
| Unigene28450  | Potri.006G133000.2 | 2.3312  | 15.2731  | -2.7118 | Down | 2.03E-37  | 1.50E-36  |
| Unigene90027  | Potri.004G034000.1 | 16.0861 | 105.3914 | -2.7119 | Down | 2.75E-156 | 1.04E-154 |
| Unigene103967 | Potri.006G187500.1 | 1.7815  | 11.6757  | -2.7123 | Down | 4.20E-48  | 3.95E-47  |
| Unigene2001   | Potri.001G020900.1 | 0.6191  | 4.0574   | -2.7123 | Down | 4.33E-13  | 1.45E-12  |
| Unigene80104  | Potri.017G041700.6 | 72.7796 | 476.9951 | -2.7124 | Down | 0         | 0         |
| Unigene8881   | Potri.016G113100.1 | 1.5224  | 9.978    | -2.7124 | Down | 4.33E-13  | 1.45E-12  |
| Unigene118814 | Potri.011G100800.1 | 0.9006  | 5.9025   | -2.7124 | Down | 4.33E-13  | 1.45E-12  |
| Unigene19377  | Potri.003G133800.1 | 1.5623  | 10.2392  | -2.7124 | Down | 8.26E-25  | 4.30E-24  |
| Unigene40383  | Potri.003G128100.1 | 1.9674  | 12.8946  | -2.7124 | Down | 8.26E-25  | 4.30E-24  |
| Unigene1364   | Potri.001G403400.1 | 0.773   | 5.0665   | -2.7124 | Down | 8.26E-25  | 4.30E-24  |
| Unigene40528  | Potri.019G078400.1 | 0.7811  | 5.1196   | -2.7125 | Down | 4.33E-13  | 1.45E-12  |
| Unigene54418  | Potri.005G044000.1 | 5.6701  | 37.1676  | -2.7126 | Down | 5.39E-82  | 9.07E-81  |
| Unigene13851  | Potri.013G060200.5 | 2.9739  | 19.4953  | -2.7127 | Down | 8.91E-59  | 1.04E-57  |
| Unigene11429  | Potri.019G001500.1 | 3.8122  | 24.9976  | -2.7131 | Down | 3.40E-136 | 1.07E-134 |
| Unigene21107  | Potri.005G242300.1 | 7.8082  | 51.1998  | -2.7131 | Down | 3.40E-136 | 1.07E-134 |
| Unigene13862  | Potri.002G253400.1 | 1.3405  | 8.7905   | -2.7132 | Down | 7.40E-24  | 3.74E-23  |
| Unigene51662  | Potri.007G076700.2 | 1.513   | 9.9223   | -2.7133 | Down | 7.40E-24  | 3.74E-23  |
| Unigene4356   | Potri.005G205800.2 | 10.5711 | 69.3519  | -2.7138 | Down | 8.02E-121 | 2.18E-119 |
| Unigene20434  | Potri.014G148900.2 | 9.3512  | 61.3532  | -2.7139 | Down | 6.38E-88  | 1.16E-86  |
| Unigene79598  | Potri.011G015500.1 | 1.6885  | 11.0799  | -2.7141 | Down | 3.96E-12  | 1.27E-11  |
| Unigene3856   | Potri.003G137500.1 | 0.9723  | 6.3801   | -2.7141 | Down | 3.96E-12  | 1.27E-11  |
| Unigene2087   | Potri.002G046300.3 | 1.5253  | 10.009   | -2.7141 | Down | 1.28E-33  | 8.55E-33  |
| Unigene393    | Potri.014G015200.2 | 2.1127  | 13.8641  | -2.7142 | Down | 5.48E-55  | 5.91E-54  |
| Unigene40566  | Potri.003G107500.1 | 0.716   | 4.6988   | -2.7143 | Down | 3.96E-12  | 1.27E-11  |
| Unigene497    | Potri.009G011800.1 | 3.812   | 25.0283  | -2.7149 | Down | 8.31E-218 | 4.78E-216 |
| Unigene119223 | Potri.018G127900.1 | 1.2413  | 8.1517   | -2.7152 | Down | 5.96E-22  | 2.83E-21  |
| Unigene94023  | Potri.006G111600.1 | 26.9037 | 176.6686 | -2.7152 | Down | 0         | 0         |
| Unigene95256  | Potri.005G107600.2 | 12.4332 | 81.6461  | -2.7152 | Down | 3.42E-83  | 5.85E-82  |
| Unigene49259  | Potri.009G139900.1 | 3.5027  | 23.0031  | -2.7153 | Down | 6.67E-93  | 1.30E-91  |
| Unigene52722  | Potri.003G219800.2 | 3.2025  | 21.0397  | -2.7158 | Down | 3.38E-51  | 3.38E-50  |

|               |                     |         |          |         |      |           |           |
|---------------|---------------------|---------|----------|---------|------|-----------|-----------|
| Unigene2413   | Potri.008G040100.2  | 5.6523  | 37.1404  | -2.7161 | Down | 2.03E-207 | 1.10E-205 |
| Unigene48565  | Potri.017G110800.3  | 1.2433  | 8.171    | -2.7163 | Down | 3.64E-11  | 1.11E-10  |
| Unigene24680  | Potri.008G113900.3  | 2.8619  | 18.8079  | -2.7163 | Down | 9.05E-31  | 5.62E-30  |
| Unigene114552 | Potri.006G123900.1  | 2.7426  | 18.0242  | -2.7163 | Down | 5.36E-21  | 2.46E-20  |
| Unigene105832 | Potri.004G234100.1  | 1.2475  | 8.1983   | -2.7163 | Down | 5.36E-21  | 2.46E-20  |
| Unigene43470  | Potri.004G228200.1  | 1.54    | 10.121   | -2.7163 | Down | 2.99E-50  | 2.94E-49  |
| Unigene116296 | Potri.004G071600.4  | 7.1273  | 46.8401  | -2.7163 | Down | 5.64E-60  | 6.70E-59  |
| Unigene28781  | Potri.004G184200.1  | 2.4549  | 16.1451  | -2.7174 | Down | 7.44E-67  | 9.97E-66  |
| Unigene30438  | Potri.008G147100.3  | 1.9102  | 12.5646  | -2.7176 | Down | 4.82E-20  | 2.15E-19  |
| Unigene48424  | Potri.003G180700.1  | 11.6909 | 76.9217  | -2.718  | Down | 1.91E-83  | 3.29E-82  |
| Unigene36210  | Potri.009G045100.1  | 25.8707 | 170.2554 | -2.7183 | Down | 7.21E-244 | 4.82E-242 |
| Unigene92511  | Potri.004G111400.1  | 31.4183 | 206.7621 | -2.7183 | Down | 0         | 0         |
| Unigene10437  | Potri.002G230200.1  | 1.5144  | 9.9665   | -2.7183 | Down | 1.85E-46  | 1.68E-45  |
| Unigene26363  | Potri.001G013000.1  | 7.2396  | 47.6458  | -2.7184 | Down | 1.85E-46  | 1.68E-45  |
| Unigene445    | Potri.008G038700.1  | 12.9231 | 85.066   | -2.7186 | Down | 0         | 0         |
| Unigene20393  | Potri.002G178100.1  | 10.6758 | 70.2886  | -2.7189 | Down | 1.32E-80  | 2.18E-79  |
| Unigene99441  | Potri.002G160900.4  | 1.5835  | 10.4254  | -2.7189 | Down | 3.36E-10  | 9.69E-10  |
| Unigene100341 | Potri.010G207900.1  | 0.6081  | 4.004    | -2.7191 | Down | 3.36E-10  | 9.69E-10  |
| Unigene34534  | Potri.003G163800.6  | 7.5213  | 49.5287  | -2.7192 | Down | 3.45E-97  | 7.12E-96  |
| Unigene21453  | Potri.007G026500.3  | 20.3205 | 133.8726 | -2.7199 | Down | 0         | 0         |
| Unigene43475  | Potri.007G008600.14 | 14.1161 | 93.0112  | -2.7201 | Down | 0         | 0         |
| Unigene22019  | Potri.014G029600.1  | 4.5449  | 29.9532  | -2.7204 | Down | 4.01E-143 | 1.35E-141 |
| Unigene27047  | Potri.005G192800.1  | 1.5353  | 10.1193  | -2.7205 | Down | 3.92E-18  | 1.63E-17  |
| Unigene14279  | Potri.001G309700.1  | 0.9394  | 6.1915   | -2.7205 | Down | 3.92E-18  | 1.63E-17  |
| Unigene24731  | Potri.001G255800.1  | 8.8478  | 58.3153  | -2.7205 | Down | 1.89E-51  | 1.90E-50  |
| Unigene104622 | Potri.002G195800.1  | 0.6675  | 4.4011   | -2.721  | Down | 5.16E-26  | 2.78E-25  |
| Unigene47821  | Potri.003G134500.1  | 19.4772 | 128.5104 | -2.722  | Down | 3.48E-151 | 1.26E-149 |
| Unigene96450  | Potri.007G045900.2  | 0.609   | 4.0185   | -2.7221 | Down | 3.11E-09  | 8.49E-09  |
| Unigene26962  | Potri.014G066600.1  | 0.5526  | 3.6464   | -2.7222 | Down | 3.11E-09  | 8.49E-09  |
| Unigene26165  | Potri.014G035700.1  | 5.2814  | 34.8509  | -2.7222 | Down | 1.32E-48  | 1.25E-47  |
| Unigene7033   | Potri.010G254200.1  | 1.0361  | 6.8371   | -2.7222 | Down | 3.11E-09  | 8.49E-09  |
| Unigene101286 | Potri.008G142400.2  | 2.4326  | 16.0522  | -2.7222 | Down | 4.62E-25  | 2.42E-24  |
| Unigene55569  | Potri.006G221700.3  | 1.4346  | 9.4667   | -2.7222 | Down | 3.11E-09  | 8.49E-09  |
| Unigene31527  | Potri.004G033600.2  | 5.5999  | 36.9532  | -2.7222 | Down | 1.94E-56  | 2.16E-55  |
| Unigene40493  | Potri.002G079100.1  | 0.5851  | 3.8609   | -2.7222 | Down | 3.11E-09  | 8.49E-09  |
| Unigene4659   | Potri.018G114500.6  | 0.8477  | 5.594    | -2.7223 | Down | 3.54E-17  | 1.42E-16  |
| Unigene86111  | Potri.013G004700.1  | 1.0013  | 6.6076   | -2.7223 | Down | 3.11E-09  | 8.49E-09  |
| Unigene35678  | Potri.012G108500.1  | 0.6165  | 4.0683   | -2.7223 | Down | 3.11E-09  | 8.49E-09  |
| Unigene118644 | Potri.001G181300.1  | 0.6403  | 4.2255   | -2.7223 | Down | 3.11E-09  | 8.49E-09  |

|               |                    |         |          |         |      |           |           |
|---------------|--------------------|---------|----------|---------|------|-----------|-----------|
| Unigene27293  | Potri.017G041700.6 | 55.3619 | 365.3848 | -2.7225 | Down | 0         | 0         |
| Unigene50043  | Potri.002G119700.2 | 22.5377 | 148.7638 | -2.7226 | Down | 0         | 0         |
| Unigene16047  | Potri.010G223500.1 | 7.5316  | 49.7163  | -2.7227 | Down | 2.55E-63  | 3.21E-62  |
| Unigene61335  | Potri.016G011400.1 | 6.1512  | 40.6082  | -2.7228 | Down | 1.17E-47  | 1.09E-46  |
| Unigene51910  | Potri.010G052200.1 | 7.2916  | 48.1417  | -2.723  | Down | 5.08E-78  | 8.09E-77  |
| Unigene20037  | Potri.012G051800.1 | 6.496   | 42.8943  | -2.7232 | Down | 1.03E-92  | 2.00E-91  |
| Unigene23533  | Potri.001G088600.1 | 7.1523  | 47.228   | -2.7232 | Down | 1.03E-92  | 2.00E-91  |
| Unigene52575  | Potri.001G189500.2 | 3.9416  | 26.0299  | -2.7233 | Down | 1.52E-54  | 1.63E-53  |
| Unigene36672  | Potri.013G024000.1 | 2.6155  | 17.2747  | -2.7235 | Down | 4.14E-24  | 2.11E-23  |
| Unigene31980  | Potri.007G018400.1 | 1.1468  | 7.5752   | -2.7237 | Down | 1.99E-61  | 2.43E-60  |
| Unigene9341   | Potri.009G106600.2 | 26.9812 | 178.242  | -2.7238 | Down | 0         | 0         |
| Unigene43924  | Potri.018G038000.1 | 2.0054  | 13.251   | -2.7241 | Down | 3.50E-75  | 5.35E-74  |
| Unigene41393  | Potri.005G141600.2 | 49.9035 | 329.9456 | -2.725  | Down | 0         | 0         |
| Unigene46899  | Potri.002G215600.1 | 3.5582  | 23.5295  | -2.7253 | Down | 4.52E-30  | 2.74E-29  |
| Unigene6017   | Potri.T046100.1    | 4.0946  | 27.0888  | -2.7259 | Down | 1.61E-64  | 2.08E-63  |
| Unigene77165  | Potri.004G072200.2 | 20.5958 | 136.2803 | -2.7262 | Down | 2.29E-126 | 6.57E-125 |
| Unigene36726  | Potri.008G113400.1 | 0.8263  | 5.4682   | -2.7263 | Down | 2.91E-08  | 7.48E-08  |
| Unigene118681 | Potri.003G159800.2 | 0.5532  | 3.6609   | -2.7263 | Down | 2.91E-08  | 7.48E-08  |
| Unigene37257  | Potri.017G145100.1 | 0.9066  | 5.9999   | -2.7264 | Down | 2.91E-08  | 7.48E-08  |
| Unigene102588 | Potri.014G152000.3 | 0.7794  | 5.1581   | -2.7264 | Down | 2.91E-08  | 7.48E-08  |
| Unigene119017 | Potri.014G086900.1 | 0.4756  | 3.1475   | -2.7264 | Down | 2.91E-08  | 7.48E-08  |
| Unigene46020  | Potri.014G024300.1 | 0.7273  | 4.8133   | -2.7264 | Down | 2.91E-08  | 7.48E-08  |
| Unigene100671 | Potri.005G072200.1 | 0.989   | 6.5453   | -2.7264 | Down | 2.91E-08  | 7.48E-08  |
| Unigene17227  | Potri.003G033100.1 | 1.4452  | 9.5644   | -2.7264 | Down | 3.33E-22  | 1.59E-21  |
| Unigene99110  | Potri.003G012800.1 | 1.2862  | 8.5121   | -2.7264 | Down | 2.91E-08  | 7.48E-08  |
| Unigene102578 | Potri.002G075800.1 | 1.0723  | 7.0964   | -2.7264 | Down | 2.91E-15  | 1.07E-14  |
| Unigene25823  | Potri.001G300900.1 | 1.1922  | 7.8902   | -2.7264 | Down | 2.91E-08  | 7.48E-08  |
| Unigene5273   | Potri.001G399100.1 | 0.8368  | 5.5383   | -2.7265 | Down | 2.91E-08  | 7.48E-08  |
| Unigene98524  | Potri.001G150800.1 | 0.518   | 3.4285   | -2.7266 | Down | 2.91E-08  | 7.48E-08  |
| Unigene31625  | Potri.005G156700.1 | 8.0293  | 53.1609  | -2.727  | Down | 9.59E-218 | 5.51E-216 |
| Unigene4369   | Potri.002G232600.2 | 4.4342  | 29.3661  | -2.7274 | Down | 4.48E-35  | 3.11E-34  |
| Unigene2744   | Potri.002G185100.1 | 1.2277  | 8.1304   | -2.7274 | Down | 4.48E-35  | 3.11E-34  |
| Unigene35913  | Potri.003G222500.1 | 4.027   | 26.6716  | -2.7275 | Down | 1.12E-61  | 1.36E-60  |
| Unigene34515  | Potri.006G139800.2 | 6.3244  | 41.8886  | -2.7276 | Down | 3.09E-88  | 5.65E-87  |
| Unigene6416   | Potri.007G058700.1 | 1.6954  | 11.2302  | -2.7277 | Down | 3.60E-28  | 2.07E-27  |
| Unigene17378  | Potri.002G176300.2 | 11.5834 | 76.7281  | -2.7277 | Down | 4.19E-207 | 2.26E-205 |
| Unigene81324  | Potri.007G046200.3 | 42.4393 | 281.1382 | -2.7278 | Down | 1.15E-285 | 9.52E-284 |
| Unigene19409  | Potri.016G093100.1 | 13.807  | 91.4713  | -2.7279 | Down | 1.74E-133 | 5.37E-132 |
| Unigene104166 | Potri.010G074800.7 | 1.8511  | 12.265   | -2.7281 | Down | 2.99E-21  | 1.39E-20  |

|               |                     |         |          |         |      |           |           |
|---------------|---------------------|---------|----------|---------|------|-----------|-----------|
| Unigene43198  | Potri.005G249700.1  | 7.3661  | 48.8048  | -2.7281 | Down | 3.86E-264 | 2.86E-262 |
| Unigene21209  | Potri.010G083300.4  | 7.9072  | 52.4045  | -2.7285 | Down | 0         | 0         |
| Unigene9272   | Potri.002G063500.7  | 2.9447  | 19.5158  | -2.7285 | Down | 3.99E-34  | 2.71E-33  |
| Unigene29183  | Potri.014G119800.1  | 3.4316  | 22.7448  | -2.7286 | Down | 5.79E-47  | 5.30E-46  |
| Unigene13043  | Potri.002G098100.2  | 2.6278  | 17.4188  | -2.7287 | Down | 1.35E-72  | 1.98E-71  |
| Unigene1569   | Potri.013G108200.1  | 1.5164  | 10.052   | -2.7288 | Down | 1.35E-72  | 1.98E-71  |
| Unigene104148 | Potri.001G373100.1  | 0.4645  | 3.0793   | -2.7289 | Down | 2.65E-14  | 9.35E-14  |
| Unigene49240  | Potri.005G192400.3  | 2.5189  | 16.7003  | -2.729  | Down | 3.22E-27  | 1.80E-26  |
| Unigene399    | Potri.003G036900.4  | 9.3938  | 62.2821  | -2.729  | Down | 0         | 0         |
| Unigene101671 | Potri.001G131000.3  | 1.0144  | 6.7256   | -2.729  | Down | 2.65E-14  | 9.35E-14  |
| Unigene89111  | Potri.018G092100.10 | 62.9162 | 417.2102 | -2.7293 | Down | 0         | 0         |
| Unigene2490   | Potri.005G159400.1  | 2.0861  | 13.8446  | -2.7304 | Down | 2.88E-26  | 1.57E-25  |
| Unigene45047  | Potri.003G071800.1  | 1.4086  | 9.3482   | -2.7304 | Down | 2.88E-26  | 1.57E-25  |
| Unigene38907  | Potri.004G209700.9  | 22.0513 | 146.3854 | -2.7308 | Down | 0         | 0         |
| Unigene44701  | Potri.006G123900.1  | 3.5558  | 23.6108  | -2.7312 | Down | 4.64E-50  | 4.53E-49  |
| Unigene103291 | Potri.017G017900.4  | 0.6115  | 4.0624   | -2.7319 | Down | 2.74E-07  | 6.60E-07  |
| Unigene35152  | Potri.011G158500.1  | 1.1332  | 7.5284   | -2.7319 | Down | 2.41E-13  | 8.17E-13  |
| Unigene116965 | Potri.002G085500.1  | 0.6602  | 4.386    | -2.7319 | Down | 2.74E-07  | 6.60E-07  |
| Unigene105820 | Potri.018G026700.1  | 1.5596  | 10.3613  | -2.732  | Down | 2.41E-13  | 8.17E-13  |
| Unigene44201  | Potri.017G052400.1  | 26.0089 | 172.7964 | -2.732  | Down | 2.12E-256 | 1.52E-254 |
| Unigene49902  | Potri.015G012500.1  | 3.2434  | 21.5486  | -2.732  | Down | 4.75E-55  | 5.13E-54  |
| Unigene117250 | Potri.010G200200.2  | 0.6358  | 4.224    | -2.732  | Down | 2.74E-07  | 6.60E-07  |
| Unigene24704  | Potri.008G021400.2  | 10.7251 | 71.2549  | -2.732  | Down | 1.24E-90  | 2.34E-89  |
| Unigene104070 | Potri.006G190500.2  | 0.7485  | 4.9728   | -2.732  | Down | 2.74E-07  | 6.60E-07  |
| Unigene2735   | Potri.006G184300.1  | 2.0818  | 13.8312  | -2.732  | Down | 2.58E-25  | 1.36E-24  |
| Unigene101857 | Potri.005G209600.1  | 0.7798  | 5.1807   | -2.732  | Down | 2.74E-07  | 6.60E-07  |
| Unigene275    | Potri.005G121600.2  | 2.6023  | 17.289   | -2.732  | Down | 2.42E-19  | 1.05E-18  |
| Unigene46600  | Potri.005G062500.3  | 0.6304  | 4.1883   | -2.732  | Down | 2.74E-07  | 6.60E-07  |
| Unigene119110 | Potri.004G113700.1  | 0.7717  | 5.1271   | -2.732  | Down | 2.41E-13  | 8.17E-13  |
| Unigene118043 | Potri.001G035700.1  | 1.1134  | 7.3973   | -2.732  | Down | 2.41E-13  | 8.17E-13  |
| Unigene112739 | Potri.016G003900.1  | 0.9097  | 6.0441   | -2.7321 | Down | 2.74E-07  | 6.60E-07  |
| Unigene31874  | Potri.014G028100.1  | 10.6769 | 70.943   | -2.7322 | Down | 0         | 0         |
| Unigene31014  | Potri.001G358500.1  | 2.8004  | 18.6094  | -2.7323 | Down | 2.61E-119 | 6.97E-118 |
| Unigene51711  | Potri.006G011500.2  | 5.6424  | 37.4977  | -2.7324 | Down | 1.30E-95  | 2.62E-94  |
| Unigene42384  | Potri.013G000300.2  | 6.671   | 44.335   | -2.7325 | Down | 0         | 0         |
| Unigene2562   | Potri.001G361500.1  | 3.6031  | 23.9471  | -2.7325 | Down | 6.67E-72  | 9.67E-71  |
| Unigene52046  | Potri.019G093500.1  | 6.8172  | 45.3264  | -2.7331 | Down | 5.90E-71  | 8.40E-70  |
| Unigene42278  | Potri.010G002500.7  | 12.4631 | 82.882   | -2.7334 | Down | 3.21E-139 | 1.04E-137 |
| Unigene32282  | Potri.006G020800.1  | 2.0228  | 13.4532  | -2.7335 | Down | 6.12E-76  | 9.45E-75  |

|               |                     |         |          |         |      |           |           |
|---------------|---------------------|---------|----------|---------|------|-----------|-----------|
| Unigene24817  | Potri.016G121600.1  | 9.9816  | 66.4094  | -2.734  | Down | 1.39E-114 | 3.52E-113 |
| Unigene34205  | Potri.001G032800.1  | 5.6847  | 37.8214  | -2.734  | Down | 3.82E-58  | 4.39E-57  |
| Unigene75077  | Potri.001G025100.16 | 29.1243 | 193.7698 | -2.734  | Down | 5.79E-171 | 2.46E-169 |
| Unigene55     | Potri.011G142000.1  | 9.0083  | 59.9367  | -2.7341 | Down | 0         | 0         |
| Unigene3483   | Potri.018G067200.2  | 5.49    | 36.532   | -2.7343 | Down | 2.50E-35  | 1.75E-34  |
| Unigene49187  | Potri.010G141400.1  | 37.2995 | 248.2063 | -2.7343 | Down | 0         | 0         |
| Unigene49531  | Potri.008G039400.1  | 4.0132  | 26.7054  | -2.7343 | Down | 2.50E-35  | 1.75E-34  |
| Unigene23904  | Potri.002G098100.2  | 3.3432  | 22.2466  | -2.7343 | Down | 3.30E-52  | 3.37E-51  |
| Unigene1594   | Potri.003G085800.1  | 8.0988  | 53.9034  | -2.7346 | Down | 5.72E-180 | 2.60E-178 |
| Unigene32103  | Potri.T023100.1     | 1.215   | 8.0873   | -2.7347 | Down | 4.78E-74  | 7.15E-73  |
| Unigene40158  | Potri.009G120700.2  | 2.6333  | 17.5276  | -2.7347 | Down | 4.78E-74  | 7.15E-73  |
| Unigene33724  | Potri.010G145900.2  | 4.5273  | 30.1389  | -2.7349 | Down | 4.07E-68  | 5.56E-67  |
| Unigene32948  | Potri.002G022000.1  | 2.2155  | 14.7515  | -2.7352 | Down | 3.48E-62  | 4.31E-61  |
| Unigene66897  | Potri.013G040700.4  | 8.5935  | 57.2245  | -2.7353 | Down | 6.40E-95  | 1.28E-93  |
| Unigene32179  | Potri.011G144300.1  | 2.9197  | 19.4438  | -2.7354 | Down | 2.54E-160 | 9.94E-159 |
| Unigene19459  | Potri.017G076800.5  | 1.1303  | 7.5278   | -2.7355 | Down | 2.21E-12  | 7.13E-12  |
| Unigene9103   | Potri.006G146600.2  | 2.7262  | 18.1568  | -2.7355 | Down | 2.07E-23  | 1.03E-22  |
| Unigene29363  | Potri.016G000900.1  | 1.5512  | 10.3312  | -2.7356 | Down | 2.07E-23  | 1.03E-22  |
| Unigene97953  | Potri.010G172100.1  | 1.1334  | 7.5486   | -2.7356 | Down | 2.21E-12  | 7.13E-12  |
| Unigene22262  | Potri.012G131100.1  | 5.3079  | 35.368   | -2.7362 | Down | 2.98E-184 | 1.41E-182 |
| Unigene32509  | Potri.015G007600.1  | 1.151   | 7.6696   | -2.7363 | Down | 2.01E-28  | 1.17E-27  |
| Unigene49124  | Potri.008G089800.1  | 2.2631  | 15.0807  | -2.7363 | Down | 2.65E-55  | 2.89E-54  |
| Unigene84489  | Potri.008G105100.4  | 9.3583  | 62.3663  | -2.7364 | Down | 3.30E-71  | 4.72E-70  |
| Unigene74063  | Potri.008G185200.2  | 7.4948  | 49.9498  | -2.7365 | Down | 2.26E-44  | 1.95E-43  |
| Unigene116    | Potri.001G161400.2  | 10.0487 | 66.9686  | -2.7365 | Down | 0         | 0         |
| Unigene89687  | Potri.013G155100.3  | 62.9236 | 419.5514 | -2.7372 | Down | 0         | 0         |
| Unigene55725  | Potri.008G217300.2  | 3.9165  | 26.1204  | -2.7375 | Down | 1.86E-22  | 8.95E-22  |
| Unigene109243 | Potri.012G003500.1  | 3.6774  | 24.5262  | -2.7376 | Down | 1.86E-22  | 8.95E-22  |
| Unigene42606  | Potri.011G075400.1  | 2.5261  | 16.85    | -2.7378 | Down | 7.24E-142 | 2.41E-140 |
| Unigene105894 | Potri.012G144900.1  | 2.0204  | 13.4788  | -2.738  | Down | 2.08E-53  | 2.18E-52  |
| Unigene2143   | Potri.001G265700.1  | 3.7138  | 24.7896  | -2.7388 | Down | 1.81E-47  | 1.67E-46  |
| Unigene40477  | Potri.001G204900.1  | 6.2166  | 41.5058  | -2.7391 | Down | 2.08E-72  | 3.04E-71  |
| Unigene51429  | Potri.019G099200.1  | 0.7257  | 4.8472   | -2.7397 | Down | 2.62E-06  | 5.81E-06  |
| Unigene118467 | Potri.016G029100.2  | 0.8401  | 5.6114   | -2.7397 | Down | 2.02E-11  | 6.24E-11  |
| Unigene116087 | Potri.015G059800.5  | 0.6075  | 4.0578   | -2.7397 | Down | 2.62E-06  | 5.82E-06  |
| Unigene100691 | Potri.010G184200.1  | 0.5601  | 3.741    | -2.7397 | Down | 2.62E-06  | 5.82E-06  |
| Unigene99552  | Potri.010G042100.7  | 0.7886  | 5.2674   | -2.7397 | Down | 2.02E-11  | 6.24E-11  |
| Unigene103283 | Potri.008G181400.2  | 1.119   | 7.4744   | -2.7397 | Down | 1.79E-16  | 6.94E-16  |
| Unigene102936 | Potri.008G129800.1  | 1.2559  | 8.3888   | -2.7397 | Down | 2.02E-11  | 6.24E-11  |



|               |                    |         |          |         |      |           |           |
|---------------|--------------------|---------|----------|---------|------|-----------|-----------|
| Unigene102548 | Potri.006G142200.1 | 0.6544  | 4.371    | -2.7397 | Down | 2.02E-11  | 6.24E-11  |
| Unigene47065  | Potri.004G033900.2 | 0.6857  | 4.5799   | -2.7397 | Down | 2.62E-06  | 5.81E-06  |
| Unigene102848 | Potri.001G423900.1 | 0.9233  | 6.167    | -2.7397 | Down | 2.62E-06  | 5.82E-06  |
| Unigene118118 | Potri.T073000.1    | 0.4571  | 3.0533   | -2.7398 | Down | 2.62E-06  | 5.82E-06  |
| Unigene115751 | Potri.019G058800.1 | 0.6258  | 4.1803   | -2.7398 | Down | 2.62E-06  | 5.82E-06  |
| Unigene67524  | Potri.014G098400.1 | 0.6258  | 4.1803   | -2.7398 | Down | 2.62E-06  | 5.81E-06  |
| Unigene94607  | Potri.010G147400.1 | 0.8252  | 5.5121   | -2.7398 | Down | 2.62E-06  | 5.81E-06  |
| Unigene98894  | Potri.009G074700.2 | 0.9973  | 6.6617   | -2.7398 | Down | 2.02E-11  | 6.24E-11  |
| Unigene43232  | Potri.008G160900.1 | 1.0332  | 6.9016   | -2.7398 | Down | 1.67E-21  | 7.80E-21  |
| Unigene115588 | Potri.007G129600.2 | 0.6365  | 4.2517   | -2.7398 | Down | 2.62E-06  | 5.82E-06  |
| Unigene116657 | Potri.005G102600.1 | 0.5703  | 3.8096   | -2.7398 | Down | 2.62E-06  | 5.82E-06  |
| Unigene49561  | Potri.004G124000.2 | 4.3171  | 28.8366  | -2.7398 | Down | 1.63E-51  | 1.65E-50  |
| Unigene17394  | Potri.004G078000.3 | 2.9525  | 19.7215  | -2.7398 | Down | 1.58E-31  | 1.00E-30  |
| Unigene103445 | Potri.001G414800.1 | 0.5298  | 3.539    | -2.7398 | Down | 2.62E-06  | 5.82E-06  |
| Unigene14931  | Potri.001G190300.1 | 0.7803  | 5.2123   | -2.7398 | Down | 2.62E-06  | 5.82E-06  |
| Unigene104490 | Potri.001G019000.1 | 0.749   | 5.003    | -2.7398 | Down | 2.62E-06  | 5.82E-06  |
| Unigene100806 | Potri.014G048200.1 | 0.5738  | 3.8331   | -2.7399 | Down | 2.62E-06  | 5.82E-06  |
| Unigene118527 | Potri.013G161200.1 | 0.827   | 5.5244   | -2.7399 | Down | 2.02E-11  | 6.24E-11  |
| Unigene116219 | Potri.013G034600.1 | 0.5977  | 3.9928   | -2.7399 | Down | 2.62E-06  | 5.82E-06  |
| Unigene112288 | Potri.007G098500.2 | 0.7738  | 5.1691   | -2.7399 | Down | 2.62E-06  | 5.82E-06  |
| Unigene114686 | Potri.006G095800.3 | 0.6806  | 4.5465   | -2.7399 | Down | 2.62E-06  | 5.82E-06  |
| Unigene45622  | Potri.010G148900.2 | 3.9281  | 26.2533  | -2.7406 | Down | 2.13E-114 | 5.40E-113 |
| Unigene50091  | Potri.015G066600.3 | 3.9882  | 26.661   | -2.7409 | Down | 2.08E-123 | 5.79E-122 |
| Unigene42117  | Potri.009G042200.1 | 1.2695  | 8.4876   | -2.7411 | Down | 1.40E-35  | 9.84E-35  |
| Unigene34051  | Potri.017G009700.1 | 2.3645  | 15.8125  | -2.7415 | Down | 1.66E-112 | 4.11E-111 |
| Unigene47305  | Potri.015G095500.2 | 10.9204 | 73.0362  | -2.7416 | Down | 1.37E-78  | 2.20E-77  |
| Unigene83556  | Potri.012G127500.1 | 41.0157 | 274.327  | -2.7416 | Down | 5.85E-299 | 5.16E-297 |
| Unigene42850  | Potri.019G091700.1 | 5.7725  | 38.6105  | -2.7417 | Down | 0         | 0         |
| Unigene20573  | Potri.006G117900.4 | 3.2552  | 21.7731  | -2.7417 | Down | 1.44E-25  | 7.65E-25  |
| Unigene103087 | Potri.012G104400.1 | 0.8854  | 5.9224   | -2.7418 | Down | 1.44E-25  | 7.65E-25  |
| Unigene108383 | Potri.003G078800.1 | 3.4236  | 22.9075  | -2.7422 | Down | 1.50E-20  | 6.80E-20  |
| Unigene13594  | Potri.014G024700.1 | 4.6101  | 30.8538  | -2.7426 | Down | 1.17E-100 | 2.52E-99  |
| Unigene9924   | Potri.018G055500.1 | 8.8189  | 59.0318  | -2.7428 | Down | 1.16E-123 | 3.24E-122 |
| Unigene14990  | Potri.012G094700.1 | 1.3187  | 8.8286   | -2.7431 | Down | 1.62E-15  | 6.03E-15  |
| Unigene84712  | Potri.002G139400.1 | 5.575   | 37.325   | -2.7431 | Down | 1.12E-43  | 9.53E-43  |
| Unigene77745  | Potri.014G138000.2 | 5.9231  | 39.6678  | -2.7435 | Down | 1.11E-38  | 8.42E-38  |
| Unigene23277  | Potri.019G020100.1 | 6.7881  | 45.4628  | -2.7436 | Down | 9.08E-99  | 1.92E-97  |
| Unigene38370  | Potri.018G118800.1 | 1.9444  | 13.0227  | -2.7436 | Down | 9.61E-62  | 1.18E-60  |
| Unigene79161  | Potri.017G041700.6 | 40.8741 | 273.7617 | -2.7437 | Down | 1.18E-264 | 8.74E-263 |

|               |                    |         |          |         |      |           |           |
|---------------|--------------------|---------|----------|---------|------|-----------|-----------|
| Unigene271    | Potri.015G060000.1 | 14.8698 | 99.6     | -2.7438 | Down | 0         | 0         |
| Unigene5372   | Potri.011G091200.1 | 44.1919 | 296.0019 | -2.7438 | Down | 0         | 0         |
| Unigene106973 | Potri.005G152100.3 | 0.9683  | 6.4859   | -2.7438 | Down | 1.29E-24  | 6.65E-24  |
| Unigene20165  | Potri.018G013600.1 | 1.2141  | 8.1388   | -2.7449 | Down | 1.35E-19  | 5.93E-19  |
| Unigene6645   | Potri.010G183300.1 | 6.9729  | 46.7436  | -2.7449 | Down | 6.01E-128 | 1.75E-126 |
| Unigene47265  | Potri.004G025900.2 | 5.5487  | 37.1962  | -2.7449 | Down | 8.27E-56  | 9.10E-55  |
| Unigene3461   | Potri.014G068500.2 | 1.5121  | 10.1368  | -2.745  | Down | 1.87E-10  | 5.46E-10  |
| Unigene99304  | Potri.008G128800.1 | 0.5748  | 3.8534   | -2.745  | Down | 1.87E-10  | 5.46E-10  |
| Unigene38597  | Potri.001G394400.3 | 1.8394  | 12.3308  | -2.745  | Down | 1.35E-19  | 5.93E-19  |
| Unigene32294  | Potri.012G066600.3 | 3.3776  | 22.6493  | -2.7454 | Down | 5.43E-118 | 1.43E-116 |
| Unigene38594  | Potri.005G237100.2 | 2.0287  | 13.6103  | -2.7461 | Down | 7.93E-46  | 7.09E-45  |
| Unigene45925  | Potri.005G191700.1 | 18.7291 | 125.6856 | -2.7465 | Down | 2.08E-238 | 1.34E-236 |
| Unigene43514  | Potri.017G129500.1 | 7.7225  | 51.8399  | -2.7469 | Down | 1.49E-249 | 1.03E-247 |
| Unigene104067 | Potri.011G079800.2 | 1.0657  | 7.1538   | -2.7469 | Down | 7.83E-41  | 6.27E-40  |
| Unigene46595  | Potri.009G046900.1 | 0.6977  | 4.6835   | -2.7469 | Down | 1.47E-14  | 5.26E-14  |
| Unigene6524   | Potri.008G055100.2 | 1.0704  | 7.1854   | -2.7469 | Down | 1.47E-14  | 5.26E-14  |
| Unigene52787  | Potri.006G123900.1 | 5.8539  | 39.2958  | -2.7469 | Down | 4.83E-80  | 7.93E-79  |
| Unigene119104 | Potri.001G021000.2 | 0.8389  | 5.6315   | -2.7469 | Down | 1.47E-14  | 5.26E-14  |
| Unigene42602  | Potri.015G103500.5 | 9.7881  | 65.7241  | -2.7473 | Down | 0         | 0         |
| Unigene24848  | Potri.012G117600.3 | 12.8437 | 86.2465  | -2.7474 | Down | 4.65E-75  | 7.08E-74  |
| Unigene28025  | Potri.018G040300.1 | 2.5374  | 17.04    | -2.7475 | Down | 8.80E-32  | 5.61E-31  |
| Unigene96827  | Potri.013G078300.1 | 0.9294  | 6.2414   | -2.7475 | Down | 8.80E-32  | 5.61E-31  |
| Unigene18238  | Potri.005G259600.1 | 4.8511  | 32.5779  | -2.7475 | Down | 3.77E-92  | 7.26E-91  |
| Unigene12553  | Potri.010G209300.1 | 8.348   | 56.0679  | -2.7477 | Down | 1.48E-190 | 7.25E-189 |
| Unigene175    | Potri.001G108800.1 | 8.7728  | 58.9253  | -2.7478 | Down | 6.33E-293 | 5.44E-291 |
| Unigene82315  | Potri.005G145400.8 | 24.1012 | 161.9773 | -2.7486 | Down | 1.17E-170 | 4.96E-169 |
| Unigene20159  | Potri.004G020900.1 | 1.5805  | 10.6252  | -2.749  | Down | 8.95E-27  | 4.95E-26  |
| Unigene21268  | Potri.010G202500.1 | 4.0311  | 27.1063  | -2.7494 | Down | 2.59E-89  | 4.81E-88  |
| Unigene47823  | Potri.001G342300.4 | 12.1855 | 81.9714  | -2.75   | Down | 2.48E-84  | 4.32E-83  |
| Unigene22617  | Potri.014G023100.1 | 4.5227  | 30.44    | -2.7507 | Down | 1.86E-91  | 3.54E-90  |
| Unigene637    | Potri.001G094000.1 | 13.1034 | 88.2132  | -2.7511 | Down | 2.92E-192 | 1.45E-190 |
| Unigene115041 | Potri.010G001400.3 | 0.531   | 3.5752   | -2.7512 | Down | 2.54E-05  | 5.17E-05  |
| Unigene111893 | Potri.015G117200.1 | 1.8886  | 12.7168  | -2.7513 | Down | 1.34E-13  | 4.60E-13  |
| Unigene107943 | Potri.011G045600.1 | 0.7314  | 4.9247   | -2.7513 | Down | 2.54E-05  | 5.17E-05  |
| Unigene102685 | Potri.010G213800.1 | 0.4549  | 3.0629   | -2.7513 | Down | 2.54E-05  | 5.17E-05  |
| Unigene110765 | Potri.010G096800.2 | 0.6602  | 4.4453   | -2.7513 | Down | 2.54E-05  | 5.17E-05  |
| Unigene96632  | Potri.010G054500.1 | 0.7832  | 5.2736   | -2.7513 | Down | 1.73E-09  | 4.79E-09  |
| Unigene113479 | Potri.008G072900.1 | 0.5851  | 3.9397   | -2.7513 | Down | 2.54E-05  | 5.17E-05  |
| Unigene118605 | Potri.004G147800.1 | 0.6473  | 4.3585   | -2.7513 | Down | 1.73E-09  | 4.79E-09  |

|               |                    |         |          |         |      |           |           |
|---------------|--------------------|---------|----------|---------|------|-----------|-----------|
| Unigene115074 | Potri.003G122700.3 | 0.5291  | 3.5625   | -2.7513 | Down | 2.54E-05  | 5.17E-05  |
| Unigene9275   | Potri.T112100.1    | 0.7497  | 5.0484   | -2.7514 | Down | 1.73E-09  | 4.79E-09  |
| Unigene77078  | Potri.019G054300.3 | 2.6061  | 17.5481  | -2.7514 | Down | 1.10E-17  | 4.49E-17  |
| Unigene27403  | Potri.013G160600.2 | 0.7386  | 4.9734   | -2.7514 | Down | 2.54E-05  | 5.17E-05  |
| Unigene102760 | Potri.009G001500.2 | 1.0753  | 7.2406   | -2.7514 | Down | 1.10E-17  | 4.49E-17  |
| Unigene25747  | Potri.008G050400.1 | 3.413   | 22.9817  | -2.7514 | Down | 7.00E-30  | 4.23E-29  |
| Unigene56869  | Potri.006G062300.7 | 3.9964  | 26.9097  | -2.7514 | Down | 8.01E-26  | 4.30E-25  |
| Unigene101500 | Potri.006G004800.1 | 1.0184  | 6.8575   | -2.7514 | Down | 1.73E-09  | 4.79E-09  |
| Unigene114621 | Potri.003G183200.1 | 0.5465  | 3.68     | -2.7514 | Down | 2.54E-05  | 5.17E-05  |
| Unigene8996   | Potri.001G144300.1 | 1.4346  | 9.6599   | -2.7514 | Down | 1.10E-17  | 4.49E-17  |
| Unigene107021 | Potri.001G137800.2 | 0.7254  | 4.8847   | -2.7514 | Down | 1.34E-13  | 4.60E-13  |
| Unigene113583 | Potri.019G090200.1 | 0.5805  | 3.9091   | -2.7515 | Down | 2.54E-05  | 5.17E-05  |
| Unigene114088 | Potri.017G004400.1 | 0.5651  | 3.8054   | -2.7515 | Down | 2.54E-05  | 5.17E-05  |
| Unigene2174   | Potri.001G351000.1 | 19.2136 | 129.387  | -2.7515 | Down | 0         | 0         |
| Unigene11188  | Potri.004G050600.1 | 8.1144  | 54.6476  | -2.7516 | Down | 8.68E-247 | 5.87E-245 |
| Unigene1230   | Potri.005G229300.1 | 4.2295  | 28.4884  | -2.7518 | Down | 6.63E-130 | 1.97E-128 |
| Unigene11612  | Potri.008G157000.1 | 4.3971  | 29.6216  | -2.752  | Down | 1.44E-89  | 2.69E-88  |
| Unigene24004  | Potri.004G143000.1 | 3.5801  | 24.1291  | -2.7527 | Down | 4.77E-132 | 1.45E-130 |
| Unigene104634 | Potri.017G053400.1 | 0.6945  | 4.6822   | -2.7531 | Down | 5.50E-33  | 3.63E-32  |
| Unigene26505  | Potri.019G067800.1 | 12.6601 | 85.3569  | -2.7532 | Down | 9.55E-96  | 1.93E-94  |
| Unigene43702  | Potri.002G040600.4 | 2.025   | 13.6531  | -2.7532 | Down | 5.50E-33  | 3.63E-32  |
| Unigene70109  | Potri.005G208900.1 | 3.6354  | 24.5185  | -2.7537 | Down | 2.84E-52  | 2.90E-51  |
| Unigene24423  | Potri.016G005400.2 | 1.4826  | 10.0043  | -2.7544 | Down | 8.35E-21  | 3.82E-20  |
| Unigene20320  | Potri.010G185800.2 | 1.3296  | 8.9719   | -2.7544 | Down | 8.35E-21  | 3.82E-20  |
| Unigene15665  | Potri.005G118300.2 | 1.1303  | 7.6269   | -2.7544 | Down | 8.35E-21  | 3.82E-20  |
| Unigene37161  | Potri.008G110300.1 | 3.7815  | 25.5247  | -2.7549 | Down | 2.18E-135 | 6.83E-134 |
| Unigene99135  | Potri.012G055200.1 | 0.5534  | 3.7363   | -2.7552 | Down | 9.94E-17  | 3.90E-16  |
| Unigene41769  | Potri.006G280500.1 | 0.8338  | 5.6295   | -2.7552 | Down | 9.94E-17  | 3.90E-16  |
| Unigene45482  | Potri.003G174900.1 | 1.3103  | 8.8464   | -2.7552 | Down | 4.90E-32  | 3.15E-31  |
| Unigene99168  | Potri.002G171600.1 | 1.3321  | 8.9938   | -2.7552 | Down | 9.94E-17  | 3.90E-16  |
| Unigene110435 | Potri.001G403300.1 | 2.5089  | 16.9391  | -2.7552 | Down | 9.94E-17  | 3.90E-16  |
| Unigene119288 | Potri.001G211700.1 | 1.6903  | 11.4121  | -2.7552 | Down | 4.90E-32  | 3.15E-31  |
| Unigene79274  | Potri.016G072500.1 | 8.6671  | 58.527   | -2.7555 | Down | 1.83E-58  | 2.12E-57  |
| Unigene65300  | Potri.T040800.4    | 10.4484 | 70.5662  | -2.7557 | Down | 5.33E-96  | 1.08E-94  |
| Unigene52521  | Potri.012G062500.2 | 7.7777  | 52.5291  | -2.7557 | Down | 5.33E-96  | 1.08E-94  |
| Unigene36200  | Potri.010G066600.1 | 14.6365 | 98.8522  | -2.7557 | Down | 5.33E-96  | 1.08E-94  |
| Unigene119428 | Potri.014G077500.1 | 1.2562  | 8.4847   | -2.7558 | Down | 5.58E-28  | 3.19E-27  |
| Unigene34756  | Potri.017G055100.2 | 1.5329  | 10.3543  | -2.7559 | Down | 1.35E-65  | 1.77E-64  |
| Unigene93678  | Potri.001G250500.1 | 31.2233 | 210.9075 | -2.7559 | Down | 0         | 0         |

|               |                    |         |          |         |      |           |           |
|---------------|--------------------|---------|----------|---------|------|-----------|-----------|
| Unigene52759  | Potri.015G125100.1 | 12.6227 | 85.271   | -2.756  | Down | 2.80E-114 | 7.08E-113 |
| Unigene4822   | Potri.018G029100.1 | 14.9011 | 100.6649 | -2.7561 | Down | 6.43E-163 | 2.58E-161 |
| Unigene34140  | Potri.015G029000.1 | 2.7274  | 18.4248  | -2.7561 | Down | 3.45E-39  | 2.65E-38  |
| Unigene33887  | Potri.017G044600.5 | 3.9298  | 26.5509  | -2.7562 | Down | 2.11E-121 | 5.79E-120 |
| Unigene93559  | Potri.010G142900.1 | 70.7384 | 477.9289 | -2.7562 | Down | 0         | 0         |
| Unigene104371 | Potri.014G001100.3 | 0.9911  | 6.6975   | -2.7565 | Down | 1.23E-12  | 4.01E-12  |
| Unigene14546  | Potri.T128700.2    | 1.5483  | 10.4633  | -2.7566 | Down | 1.23E-12  | 4.01E-12  |
| Unigene9382   | Potri.013G085000.1 | 1.6954  | 11.4578  | -2.7566 | Down | 1.23E-12  | 4.01E-12  |
| Unigene3552   | Potri.010G091200.1 | 1.4447  | 9.7633   | -2.7566 | Down | 1.23E-12  | 4.01E-12  |
| Unigene73697  | Potri.009G044200.1 | 5.8061  | 39.2374  | -2.7566 | Down | 3.87E-35  | 2.69E-34  |
| Unigene49738  | Potri.006G048100.1 | 2.088   | 14.1108  | -2.7566 | Down | 2.46E-46  | 2.23E-45  |
| Unigene40501  | Potri.005G251800.1 | 1.6511  | 11.1581  | -2.7566 | Down | 6.42E-24  | 3.25E-23  |
| Unigene50335  | Potri.004G122000.1 | 2.8218  | 19.07    | -2.7566 | Down | 1.62E-57  | 1.84E-56  |
| Unigene357    | Potri.006G184200.1 | 1.8221  | 12.3173  | -2.757  | Down | 1.79E-53  | 1.87E-52  |
| Unigene22151  | Potri.008G144500.6 | 8.9609  | 60.5795  | -2.7571 | Down | 4.08E-164 | 1.65E-162 |
| Unigene19528  | Potri.010G026800.4 | 1.6316  | 11.0351  | -2.7577 | Down | 3.06E-38  | 2.30E-37  |
| Unigene10510  | Potri.009G003100.1 | 1.3165  | 8.9038   | -2.7577 | Down | 7.52E-20  | 3.33E-19  |
| Unigene10832  | Potri.003G192500.1 | 9.9536  | 67.3188  | -2.7577 | Down | 5.81E-287 | 4.87E-285 |
| Unigene45019  | Potri.007G141000.1 | 1.7397  | 11.7707  | -2.7583 | Down | 4.99E-27  | 2.78E-26  |
| Unigene21560  | Potri.002G260100.2 | 8.5614  | 57.9297  | -2.7584 | Down | 0         | 0         |
| Unigene37948  | Potri.003G018800.3 | 6.8993  | 46.6892  | -2.7586 | Down | 8.50E-67  | 1.14E-65  |
| Unigene22388  | Potri.004G058100.1 | 2.9593  | 20.0284  | -2.7587 | Down | 3.21E-153 | 1.18E-151 |
| Unigene6789   | Potri.017G131900.1 | 3.1692  | 21.4496  | -2.7588 | Down | 2.43E-41  | 1.97E-40  |
| Unigene18857  | Potri.010G029500.5 | 2.6933  | 18.2312  | -2.759  | Down | 1.27E-55  | 1.39E-54  |
| Unigene73273  | Potri.003G204300.3 | 18.1169 | 122.6606 | -2.7593 | Down | 1.60E-105 | 3.66E-104 |
| Unigene104415 | Potri.018G031800.1 | 0.509   | 3.4467   | -2.7595 | Down | 1.61E-08  | 4.22E-08  |
| Unigene116580 | Potri.014G048100.1 | 0.8059  | 5.4573   | -2.7595 | Down | 1.61E-08  | 4.22E-08  |
| Unigene1166   | Potri.009G151400.9 | 10.8361 | 73.3754  | -2.7595 | Down | 7.17E-248 | 4.89E-246 |
| Unigene116022 | Potri.008G062100.1 | 0.8561  | 5.7972   | -2.7595 | Down | 1.61E-08  | 4.22E-08  |
| Unigene117607 | Potri.001G468400.1 | 0.7019  | 4.7531   | -2.7595 | Down | 1.61E-08  | 4.22E-08  |
| Unigene114197 | Potri.001G163300.2 | 0.9816  | 6.6472   | -2.7595 | Down | 1.61E-08  | 4.22E-08  |
| Unigene109859 | Potri.016G001300.1 | 1.1977  | 8.1108   | -2.7596 | Down | 1.61E-08  | 4.22E-08  |
| Unigene115628 | Potri.013G077700.1 | 0.8881  | 6.0141   | -2.7596 | Down | 1.61E-08  | 4.22E-08  |
| Unigene100724 | Potri.012G004000.1 | 1.1352  | 7.6876   | -2.7596 | Down | 1.61E-08  | 4.22E-08  |
| Unigene117068 | Potri.006G087400.2 | 1.518   | 10.2799  | -2.7596 | Down | 9.01E-16  | 3.39E-15  |
| Unigene12500  | Potri.004G038300.2 | 3.4929  | 23.6542  | -2.7596 | Down | 1.02E-58  | 1.19E-57  |
| Unigene105932 | Potri.002G007300.1 | 0.8422  | 5.7037   | -2.7597 | Down | 9.01E-16  | 3.39E-15  |
| Unigene22405  | Potri.004G040300.3 | 6.1246  | 41.4832  | -2.7598 | Down | 6.10E-126 | 1.74E-124 |
| Unigene88395  | Potri.002G055400.7 | 13.2571 | 89.8115  | -2.7601 | Down | 6.58E-122 | 1.81E-120 |

|               |                     |         |          |         |      |           |           |
|---------------|---------------------|---------|----------|---------|------|-----------|-----------|
| Unigene59703  | Potri.017G106800.2  | 4.5523  | 30.8508  | -2.7606 | Down | 3.06E-33  | 2.03E-32  |
| Unigene31279  | Potri.013G148500.1  | 1.9293  | 13.0775  | -2.7609 | Down | 4.46E-26  | 2.41E-25  |
| Unigene13391  | Potri.005G074200.2  | 10.5295 | 71.372   | -2.7609 | Down | 3.34E-302 | 2.98E-300 |
| Unigene2810   | Potri.003G110700.1  | 1.667   | 11.2998  | -2.761  | Down | 4.46E-26  | 2.41E-25  |
| Unigene32338  | Potri.016G052500.1  | 2.6231  | 17.7835  | -2.7612 | Down | 3.86E-127 | 1.11E-125 |
| Unigene6101   | Potri.017G036600.1  | 4.9346  | 33.4616  | -2.7615 | Down | 2.42E-36  | 1.74E-35  |
| Unigene100736 | Potri.010G134100.3  | 0.8376  | 5.6801   | -2.7616 | Down | 6.77E-19  | 2.90E-18  |
| Unigene44635  | Potri.010G170200.1  | 1.8401  | 12.4842  | -2.7622 | Down | 1.92E-39  | 1.48E-38  |
| Unigene21302  | Potri.014G023000.1  | 12.4639 | 84.5652  | -2.7623 | Down | 0         | 0         |
| Unigene100492 | Potri.014G043100.1  | 0.8198  | 5.5641   | -2.7628 | Down | 1.12E-11  | 3.51E-11  |
| Unigene49035  | Potri.010G134200.1  | 1.3134  | 8.9143   | -2.7628 | Down | 1.12E-11  | 3.51E-11  |
| Unigene35406  | Potri.004G175600.1  | 1.1584  | 7.8623   | -2.7628 | Down | 1.12E-11  | 3.51E-11  |
| Unigene13920  | Potri.012G033500.3  | 2.5421  | 17.2569  | -2.7631 | Down | 3.49E-117 | 9.10E-116 |
| Unigene81575  | Potri.006G006000.1  | 27.2067 | 184.6944 | -2.7631 | Down | 1.04E-191 | 5.14E-190 |
| Unigene4872   | Potri.003G134500.1  | 14.0335 | 95.2907  | -2.7635 | Down | 2.03E-79  | 3.31E-78  |
| Unigene42371  | Potri.001G161600.1  | 8.6033  | 58.422   | -2.7635 | Down | 0         | 0         |
| Unigene74028  | Potri.009G126000.1  | 69.0216 | 468.7022 | -2.7636 | Down | 0         | 0         |
| Unigene43039  | Potri.007G027300.2  | 8.7854  | 59.6689  | -2.7638 | Down | 0         | 0         |
| Unigene53397  | Potri.010G038300.1  | 3.6263  | 24.6374  | -2.7643 | Down | 7.80E-52  | 7.92E-51  |
| Unigene67184  | Potri.018G048700.1  | 5.051   | 34.3249  | -2.7646 | Down | 1.36E-41  | 1.10E-40  |
| Unigene6228   | Potri.009G154600.1  | 1.2032  | 8.1766   | -2.7646 | Down | 8.18E-15  | 2.96E-14  |
| Unigene4891   | Potri.002G188400.1  | 3.9263  | 26.6817  | -2.7646 | Down | 3.11E-28  | 1.79E-27  |
| Unigene77008  | Potri.015G144200.1  | 27.8525 | 189.3443 | -2.7651 | Down | 8.72E-177 | 3.87E-175 |
| Unigene36486  | Potri.002G026600.3  | 9.0975  | 61.846   | -2.7651 | Down | 3.87E-104 | 8.69E-103 |
| Unigene52370  | Potri.006G104100.1  | 7.6208  | 51.8166  | -2.7654 | Down | 4.81E-186 | 2.30E-184 |
| Unigene119336 | Potri.014G117400.1  | 0.8587  | 5.8399   | -2.7657 | Down | 6.11E-18  | 2.52E-17  |
| Unigene41941  | Potri.006G004300.1  | 2.1314  | 14.4954  | -2.7657 | Down | 6.11E-18  | 2.52E-17  |
| Unigene38376  | Potri.019G031400.1  | 12.5057 | 85.0567  | -2.7658 | Down | 2.64E-237 | 1.69E-235 |
| Unigene48503  | Potri.013G110000.1  | 8.8891  | 60.4656  | -2.766  | Down | 5.54E-54  | 5.86E-53  |
| Unigene12863  | Potri.013G101000.1  | 11.518  | 78.3503  | -2.766  | Down | 5.53E-178 | 2.48E-176 |
| Unigene7964   | Potri.014G157500.1  | 44.5588 | 303.1694 | -2.7663 | Down | 0         | 0         |
| Unigene1740   | Potri.T138900.1     | 1.3525  | 9.2027   | -2.7664 | Down | 4.65E-21  | 2.14E-20  |
| Unigene33823  | Potri.009G053700.22 | 10.1952 | 69.3865  | -2.7668 | Down | 0         | 0         |
| Unigene43052  | Potri.011G136100.2  | 2.2309  | 15.1846  | -2.7669 | Down | 1.63E-111 | 4.00E-110 |
| Unigene29749  | Potri.011G112700.3  | 1.4346  | 9.7653   | -2.767  | Down | 3.57E-24  | 1.82E-23  |
| Unigene68467  | Potri.006G175200.1  | 2.7919  | 19.0098  | -2.7674 | Down | 2.78E-27  | 1.56E-26  |
| Unigene2748   | Potri.017G083300.2  | 1.4405  | 9.8107   | -2.7678 | Down | 2.17E-30  | 1.33E-29  |
| Unigene43939  | Potri.012G077400.4  | 3.1     | 21.1161  | -2.768  | Down | 1.71E-33  | 1.14E-32  |
| Unigene40897  | Potri.018G015100.1  | 10.544  | 71.8506  | -2.7686 | Down | 5.80E-84  | 1.00E-82  |

|               |                    |         |          |         |      |           |           |
|---------------|--------------------|---------|----------|---------|------|-----------|-----------|
| Unigene12404  | Potri.006G110000.1 | 3.2799  | 22.3525  | -2.7687 | Down | 6.78E-46  | 6.07E-45  |
| Unigene12137  | Potri.013G110000.1 | 5.7994  | 39.5275  | -2.7689 | Down | 2.06E-99  | 4.39E-98  |
| Unigene51161  | Potri.018G151600.1 | 2.9274  | 19.9567  | -2.7692 | Down | 2.26E-61  | 2.75E-60  |
| Unigene80380  | Potri.018G039800.1 | 10.0769 | 68.7037  | -2.7693 | Down | 1.19E-70  | 1.69E-69  |
| Unigene284    | Potri.003G167900.1 | 6.4795  | 44.1808  | -2.7695 | Down | 0         | 0         |
| Unigene91048  | Potri.001G082100.1 | 17.678  | 120.5556 | -2.7697 | Down | 3.31E-198 | 1.70E-196 |
| Unigene92883  | Potri.007G026500.2 | 29.5349 | 201.4733 | -2.7701 | Down | 0         | 0         |
| Unigene86024  | Potri.014G175200.5 | 34.0343 | 232.1812 | -2.7702 | Down | 1.44E-280 | 1.15E-278 |
| Unigene51251  | Potri.019G104500.1 | 1.0825  | 7.3859   | -2.7704 | Down | 2.48E-26  | 1.35E-25  |
| Unigene105198 | Potri.015G121700.1 | 0.7993  | 5.4537   | -2.7704 | Down | 1.52E-07  | 3.71E-07  |
| Unigene6868   | Potri.015G022000.1 | 1.7349  | 11.8375  | -2.7704 | Down | 1.52E-32  | 9.90E-32  |
| Unigene108416 | Potri.013G048500.1 | 0.5406  | 3.6885   | -2.7704 | Down | 2.52E-04  | 4.63E-04  |
| Unigene31701  | Potri.010G243400.1 | 0.8608  | 5.8732   | -2.7704 | Down | 1.52E-07  | 3.71E-07  |
| Unigene16346  | Potri.010G003100.1 | 0.5813  | 3.9663   | -2.7704 | Down | 1.52E-07  | 3.71E-07  |
| Unigene96491  | Potri.007G009600.1 | 0.4682  | 3.1946   | -2.7704 | Down | 2.52E-04  | 4.63E-04  |
| Unigene116396 | Potri.003G193600.1 | 0.7038  | 4.802    | -2.7704 | Down | 1.52E-07  | 3.71E-07  |
| Unigene101765 | Potri.002G028200.1 | 0.4702  | 3.2081   | -2.7704 | Down | 2.52E-04  | 4.63E-04  |
| Unigene114768 | Potri.002G011100.1 | 0.8109  | 5.5327   | -2.7704 | Down | 1.52E-07  | 3.71E-07  |
| Unigene15985  | Potri.001G469900.1 | 1.3282  | 9.0625   | -2.7704 | Down | 7.45E-14  | 2.58E-13  |
| Unigene44924  | Potri.001G465800.1 | 0.6922  | 4.7228   | -2.7704 | Down | 1.03E-10  | 3.08E-10  |
| Unigene6299   | Potri.001G397800.1 | 0.7235  | 4.9365   | -2.7704 | Down | 1.03E-10  | 3.08E-10  |
| Unigene27736  | Potri.001G031500.1 | 1.0485  | 7.1539   | -2.7704 | Down | 1.20E-35  | 8.45E-35  |
| Unigene4804   | Potri.019G060400.1 | 0.4973  | 3.3934   | -2.7705 | Down | 2.52E-04  | 4.63E-04  |
| Unigene109892 | Potri.018G121200.1 | 0.5133  | 3.5024   | -2.7705 | Down | 2.52E-04  | 4.63E-04  |
| Unigene107489 | Potri.018G047400.6 | 0.5567  | 3.7986   | -2.7705 | Down | 2.52E-04  | 4.63E-04  |
| Unigene113979 | Potri.018G022100.1 | 3.8292  | 26.128   | -2.7705 | Down | 1.94E-29  | 1.16E-28  |
| Unigene109104 | Potri.018G021900.1 | 0.5278  | 3.6015   | -2.7705 | Down | 2.52E-04  | 4.63E-04  |
| Unigene51447  | Potri.017G145400.1 | 1.2196  | 8.3217   | -2.7705 | Down | 7.45E-14  | 2.58E-13  |
| Unigene10421  | Potri.017G088900.1 | 3.1257  | 21.3273  | -2.7705 | Down | 4.80E-48  | 4.51E-47  |
| Unigene68147  | Potri.017G041800.4 | 2.5598  | 17.4661  | -2.7705 | Down | 3.20E-23  | 1.58E-22  |
| Unigene61401  | Potri.016G037900.1 | 1.9128  | 13.0516  | -2.7705 | Down | 7.45E-14  | 2.58E-13  |
| Unigene23476  | Potri.013G116700.1 | 1.2175  | 8.3073   | -2.7705 | Down | 1.20E-35  | 8.45E-35  |
| Unigene48271  | Potri.013G100500.2 | 1.5541  | 10.6044  | -2.7705 | Down | 1.03E-10  | 3.08E-10  |
| Unigene70526  | Potri.013G040700.1 | 0.5595  | 3.8176   | -2.7705 | Down | 2.52E-04  | 4.63E-04  |
| Unigene106334 | Potri.013G030900.1 | 1.6954  | 11.5685  | -2.7705 | Down | 1.94E-29  | 1.16E-28  |
| Unigene35443  | Potri.012G007600.1 | 1.5872  | 10.8301  | -2.7705 | Down | 7.45E-14  | 2.58E-13  |
| Unigene99581  | Potri.010G081300.5 | 0.4476  | 3.0541   | -2.7705 | Down | 2.52E-04  | 4.63E-04  |
| Unigene118989 | Potri.010G038100.1 | 0.6205  | 4.2339   | -2.7705 | Down | 1.03E-10  | 3.08E-10  |
| Unigene97685  | Potri.009G147600.1 | 1.4485  | 9.8837   | -2.7705 | Down | 2.48E-26  | 1.35E-25  |

|               |                    |         |          |         |      |           |           |
|---------------|--------------------|---------|----------|---------|------|-----------|-----------|
| Unigene54390  | Potri.008G110300.2 | 2.4866  | 16.9671  | -2.7705 | Down | 5.52E-17  | 2.19E-16  |
| Unigene104556 | Potri.008G101800.1 | 0.5411  | 3.6921   | -2.7705 | Down | 5.52E-17  | 2.19E-16  |
| Unigene111325 | Potri.007G124700.1 | 0.4844  | 3.3053   | -2.7705 | Down | 2.52E-04  | 4.63E-04  |
| Unigene17696  | Potri.006G207800.1 | 1.0885  | 7.4272   | -2.7705 | Down | 5.52E-17  | 2.19E-16  |
| Unigene109144 | Potri.006G148800.1 | 0.5278  | 3.6015   | -2.7705 | Down | 2.52E-04  | 4.63E-04  |
| Unigene94858  | Potri.006G132100.1 | 1.0811  | 7.377    | -2.7705 | Down | 1.52E-07  | 3.71E-07  |
| Unigene118111 | Potri.006G050000.1 | 0.5485  | 3.7427   | -2.7705 | Down | 1.52E-07  | 3.71E-07  |
| Unigene114831 | Potri.005G107800.1 | 0.8079  | 5.5128   | -2.7705 | Down | 1.52E-07  | 3.71E-07  |
| Unigene110046 | Potri.004G169500.1 | 0.5086  | 3.4705   | -2.7705 | Down | 2.52E-04  | 4.63E-04  |
| Unigene23820  | Potri.003G067000.1 | 4.0136  | 27.3859  | -2.7705 | Down | 3.40E-156 | 1.28E-154 |
| Unigene24352  | Potri.002G254600.1 | 2.4105  | 16.4477  | -2.7705 | Down | 3.82E-119 | 1.02E-117 |
| Unigene115916 | Potri.002G092400.7 | 1.4821  | 10.1128  | -2.7705 | Down | 7.45E-14  | 2.58E-13  |
| Unigene24694  | Potri.001G326800.1 | 0.5828  | 3.9767   | -2.7705 | Down | 1.52E-07  | 3.71E-07  |
| Unigene105486 | Potri.001G085400.4 | 1.262   | 8.6111   | -2.7705 | Down | 1.03E-10  | 3.08E-10  |
| Unigene113168 | Potri.001G039900.1 | 0.4458  | 3.0419   | -2.7705 | Down | 2.52E-04  | 4.63E-04  |
| Unigene108107 | Potri.005G033700.2 | 0.5458  | 3.7245   | -2.7706 | Down | 2.52E-04  | 4.63E-04  |
| Unigene111783 | Potri.002G243500.3 | 0.4741  | 3.2352   | -2.7706 | Down | 2.52E-04  | 4.63E-04  |
| Unigene118311 | Potri.002G180900.1 | 0.5253  | 3.5846   | -2.7706 | Down | 1.52E-07  | 3.71E-07  |
| Unigene105961 | Potri.002G166100.1 | 0.6406  | 4.3713   | -2.7706 | Down | 1.03E-10  | 3.08E-10  |
| Unigene21538  | Potri.010G054100.1 | 2.6884  | 18.3593  | -2.7717 | Down | 1.07E-132 | 3.29E-131 |
| Unigene10687  | Potri.008G111200.1 | 2.9656  | 20.2573  | -2.772  | Down | 8.23E-102 | 1.80E-100 |
| Unigene18613  | Potri.004G040000.4 | 2.8348  | 19.3693  | -2.7725 | Down | 6.70E-41  | 5.37E-40  |
| Unigene86585  | Potri.002G118900.1 | 18.7113 | 127.85   | -2.7725 | Down | 1.36E-158 | 5.26E-157 |
| Unigene58276  | Potri.006G111300.1 | 12.515  | 85.5258  | -2.7727 | Down | 4.81E-107 | 1.12E-105 |
| Unigene71880  | Potri.003G029200.1 | 11.6447 | 79.5863  | -2.7728 | Down | 8.19E-68  | 1.11E-66  |
| Unigene88819  | Potri.011G058100.3 | 17.1731 | 117.3738 | -2.7729 | Down | 8.04E-164 | 3.24E-162 |
| Unigene9677   | Potri.T021000.1    | 1.9077  | 13.0407  | -2.7731 | Down | 1.35E-31  | 8.59E-31  |
| Unigene71388  | Potri.012G004900.3 | 16.9042 | 115.6067 | -2.7738 | Down | 7.85E-97  | 1.61E-95  |
| Unigene22454  | Potri.005G229300.1 | 3.3441  | 22.8838  | -2.7746 | Down | 6.92E-96  | 1.40E-94  |
| Unigene82723  | Potri.017G150100.1 | 71.7626 | 491.0846 | -2.7747 | Down | 0         | 0         |
| Unigene8968   | Potri.014G068500.2 | 1.2606  | 8.6282   | -2.7749 | Down | 3.76E-19  | 1.62E-18  |
| Unigene99305  | Potri.010G129400.1 | 0.8455  | 5.7867   | -2.7749 | Down | 3.76E-19  | 1.62E-18  |
| Unigene43202  | Potri.015G143800.1 | 1.1645  | 7.9706   | -2.775  | Down | 7.50E-37  | 5.46E-36  |
| Unigene17011  | Potri.008G135600.8 | 0.9578  | 6.5559   | -2.775  | Down | 3.76E-19  | 1.62E-18  |
| Unigene10364  | Potri.T098900.1    | 21.0015 | 143.7711 | -2.7752 | Down | 2.02E-200 | 1.06E-198 |
| Unigene32939  | Potri.008G029700.1 | 6.6617  | 45.6233  | -2.7758 | Down | 9.27E-237 | 5.94E-235 |
| Unigene6571   | Potri.019G063500.2 | 1.1708  | 8.019    | -2.7759 | Down | 5.00E-16  | 1.91E-15  |
| Unigene53247  | Potri.012G122600.1 | 1.9128  | 13.1007  | -2.7759 | Down | 5.00E-16  | 1.91E-15  |
| Unigene94848  | Potri.010G164700.2 | 1.7465  | 11.9615  | -2.7759 | Down | 5.00E-16  | 1.91E-15  |

|               |                    |         |          |         |      |           |           |
|---------------|--------------------|---------|----------|---------|------|-----------|-----------|
| Unigene36110  | Potri.004G032700.1 | 0.8315  | 5.695    | -2.7759 | Down | 5.00E-16  | 1.91E-15  |
| Unigene22104  | Potri.005G102700.4 | 3.1419  | 21.5204  | -2.776  | Down | 3.92E-187 | 1.88E-185 |
| Unigene28904  | Potri.008G091900.2 | 3.7981  | 26.0207  | -2.7763 | Down | 1.40E-82  | 2.37E-81  |
| Unigene12420  | Potri.005G109300.1 | 1.2752  | 8.7392   | -2.7768 | Down | 5.28E-39  | 4.04E-38  |
| Unigene54109  | Potri.005G186900.1 | 5.1023  | 34.9725  | -2.777  | Down | 7.00E-62  | 8.60E-61  |
| Unigene27458  | Potri.010G076700.3 | 1.2703  | 8.7089   | -2.7773 | Down | 6.80E-13  | 2.25E-12  |
| Unigene57203  | Potri.002G072300.1 | 1.6478  | 11.297   | -2.7773 | Down | 6.80E-13  | 2.25E-12  |
| Unigene92328  | Potri.001G351200.2 | 16.8604 | 115.586  | -2.7773 | Down | 1.38E-221 | 8.10E-220 |
| Unigene107127 | Potri.011G150900.1 | 0.7998  | 5.4834   | -2.7774 | Down | 1.99E-24  | 1.02E-23  |
| Unigene101768 | Potri.004G191300.2 | 1.0493  | 7.1943   | -2.7774 | Down | 6.80E-13  | 2.25E-12  |
| Unigene57128  | Potri.013G051200.1 | 5.2289  | 35.8662  | -2.778  | Down | 8.45E-33  | 5.54E-32  |
| Unigene41758  | Potri.016G065400.1 | 1.2521  | 8.5908   | -2.7784 | Down | 2.58E-21  | 1.20E-20  |
| Unigene2869   | Potri.014G036800.3 | 1.3346  | 9.1571   | -2.7785 | Down | 2.58E-21  | 1.20E-20  |
| Unigene56200  | Potri.019G119900.1 | 5.4892  | 37.6754  | -2.779  | Down | 1.00E-214 | 5.66E-213 |
| Unigene16833  | Potri.018G032500.1 | 10.956  | 75.1981  | -2.779  | Down | 2.99E-94  | 5.93E-93  |
| Unigene34766  | Potri.005G169300.1 | 1.7642  | 12.1099  | -2.7791 | Down | 4.69E-38  | 3.51E-37  |
| Unigene50081  | Potri.004G230300.1 | 1.3697  | 9.4029   | -2.7792 | Down | 2.10E-46  | 1.90E-45  |
| Unigene20403  | Potri.017G112900.1 | 20.5319 | 140.9554 | -2.7793 | Down | 7.71E-189 | 3.75E-187 |
| Unigene25958  | Potri.007G094500.2 | 6.7674  | 46.4588  | -2.7793 | Down | 2.10E-46  | 1.90E-45  |
| Unigene106641 | Potri.001G042000.1 | 0.4563  | 3.1337   | -2.7798 | Down | 9.58E-10  | 2.69E-09  |
| Unigene102280 | Potri.016G140500.1 | 0.5226  | 3.5892   | -2.7799 | Down | 9.58E-10  | 2.69E-09  |
| Unigene115415 | Potri.010G130800.3 | 1.0325  | 7.0915   | -2.7799 | Down | 9.58E-10  | 2.69E-09  |
| Unigene28510  | Potri.005G149700.1 | 1.7199  | 11.8124  | -2.7799 | Down | 3.39E-18  | 1.41E-17  |
| Unigene30540  | Potri.005G060800.2 | 0.7105  | 4.8796   | -2.7799 | Down | 9.58E-10  | 2.69E-09  |
| Unigene4946   | Potri.019G109500.1 | 1.4699  | 10.0958  | -2.78   | Down | 9.58E-10  | 2.69E-09  |
| Unigene26912  | Potri.017G059800.3 | 0.8501  | 5.8389   | -2.78   | Down | 9.58E-10  | 2.69E-09  |
| Unigene3503   | Potri.015G023800.1 | 1.4415  | 9.9007   | -2.78   | Down | 9.58E-10  | 2.69E-09  |
| Unigene47960  | Potri.009G051200.4 | 1.4415  | 9.9007   | -2.78   | Down | 1.38E-26  | 7.57E-26  |
| Unigene10004  | Potri.008G199500.1 | 1.7248  | 11.8465  | -2.78   | Down | 3.39E-18  | 1.41E-17  |
| Unigene118059 | Potri.008G026500.1 | 0.7404  | 5.0855   | -2.78   | Down | 9.58E-10  | 2.69E-09  |
| Unigene116915 | Potri.006G041600.3 | 0.8854  | 6.0814   | -2.78   | Down | 9.58E-10  | 2.69E-09  |
| Unigene37401  | Potri.003G120500.1 | 0.7404  | 5.0855   | -2.78   | Down | 9.58E-10  | 2.69E-09  |
| Unigene40246  | Potri.008G064200.1 | 2.7114  | 18.632   | -2.7807 | Down | 3.31E-40  | 2.60E-39  |
| Unigene117111 | Potri.002G254600.3 | 3.1353  | 21.5486  | -2.7809 | Down | 7.53E-32  | 4.81E-31  |
| Unigene94646  | Potri.017G141000.3 | 3.0374  | 20.878   | -2.7811 | Down | 8.46E-54  | 8.93E-53  |
| Unigene33749  | Potri.019G070600.1 | 1.5006  | 10.3157  | -2.7812 | Down | 1.78E-23  | 8.87E-23  |
| Unigene2027   | Potri.T131300.1    | 4.5606  | 31.3526  | -2.7813 | Down | 2.86E-89  | 5.31E-88  |
| Unigene40289  | Potri.010G085500.1 | 2.1519  | 14.7935  | -2.7813 | Down | 1.78E-23  | 8.87E-23  |
| Unigene18855  | Potri.001G342600.3 | 9.8189  | 67.5298  | -2.7819 | Down | 1.73E-167 | 7.17E-166 |



|               |                     |         |          |         |      |           |           |
|---------------|---------------------|---------|----------|---------|------|-----------|-----------|
| Unigene42554  | Potri.003G138200.1  | 2.9633  | 20.3818  | -2.782  | Down | 1.26E-145 | 4.34E-144 |
| Unigene72648  | Potri.019G131300.1  | 4.6624  | 32.0709  | -2.7821 | Down | 9.60E-29  | 5.63E-28  |
| Unigene8337   | Potri.014G095300.5  | 1.5968  | 10.9837  | -2.7821 | Down | 2.33E-42  | 1.93E-41  |
| Unigene103818 | Potri.006G149000.1  | 0.746   | 5.1313   | -2.7821 | Down | 4.54E-15  | 1.66E-14  |
| Unigene91997  | Potri.004G138200.1  | 24.4519 | 168.2421 | -2.7825 | Down | 0         | 0         |
| Unigene27071  | Potri.014G041200.1  | 6.4015  | 44.0474  | -2.7826 | Down | 5.35E-80  | 8.77E-79  |
| Unigene52106  | Potri.004G156000.5  | 5.496   | 37.8167  | -2.7826 | Down | 5.35E-80  | 8.77E-79  |
| Unigene63564  | Potri.001G374200.4  | 2.6681  | 18.362   | -2.7828 | Down | 7.49E-53  | 7.75E-52  |
| Unigene116987 | Potri.016G025300.1  | 1.9747  | 13.5921  | -2.7831 | Down | 2.32E-20  | 1.04E-19  |
| Unigene709    | Potri.006G237400.3  | 1.4657  | 10.0914  | -2.7835 | Down | 2.09E-111 | 5.15E-110 |
| Unigene119450 | Potri.006G067000.1  | 1.075   | 7.4025   | -2.7837 | Down | 1.23E-25  | 6.58E-25  |
| Unigene51781  | Potri.019G027100.2  | 6.2166  | 42.829   | -2.7844 | Down | 3.37E-81  | 5.62E-80  |
| Unigene51980  | Potri.014G106000.5  | 4.1203  | 28.3866  | -2.7844 | Down | 2.07E-41  | 1.68E-40  |
| Unigene85719  | Potri.011G087600.1  | 12.9016 | 88.9029  | -2.7847 | Down | 2.26E-107 | 5.28E-106 |
| Unigene4449   | Potri.016G143200.1  | 11.0567 | 76.2084  | -2.785  | Down | 1.40E-88  | 2.58E-87  |
| Unigene117180 | Potri.019G088600.1  | 0.5344  | 3.6846   | -2.7855 | Down | 1.44E-06  | 3.28E-06  |
| Unigene118276 | Potri.014G098900.1  | 0.4409  | 3.04     | -2.7855 | Down | 1.44E-06  | 3.28E-06  |
| Unigene114987 | Potri.007G077100.2  | 0.6661  | 4.5926   | -2.7855 | Down | 1.44E-06  | 3.28E-06  |
| Unigene117862 | Potri.006G096600.2  | 0.4807  | 3.3142   | -2.7855 | Down | 1.44E-06  | 3.28E-06  |
| Unigene24956  | Potri.005G225900.1  | 0.7201  | 4.965    | -2.7855 | Down | 1.44E-06  | 3.28E-06  |
| Unigene35442  | Potri.T091500.1     | 0.7869  | 5.4259   | -2.7856 | Down | 1.44E-06  | 3.28E-06  |
| Unigene58528  | Potri.010G138100.1  | 1.0596  | 7.3064   | -2.7856 | Down | 6.23E-12  | 1.97E-11  |
| Unigene105922 | Potri.009G053000.1  | 0.5453  | 3.76     | -2.7856 | Down | 1.44E-06  | 3.28E-06  |
| Unigene9974   | Potri.008G155900.1  | 1.6504  | 11.3799  | -2.7856 | Down | 2.61E-38  | 1.96E-37  |
| Unigene113091 | Potri.006G188000.1  | 0.746   | 5.1437   | -2.7856 | Down | 1.44E-06  | 3.28E-06  |
| Unigene36272  | Potri.005G250600.1  | 1.0419  | 7.1839   | -2.7856 | Down | 1.60E-22  | 7.71E-22  |
| Unigene116105 | Potri.005G101300.2  | 0.6055  | 4.1751   | -2.7856 | Down | 1.44E-06  | 3.28E-06  |
| Unigene19523  | Potri.003G013300.1  | 0.9781  | 6.7444   | -2.7856 | Down | 3.07E-17  | 1.23E-16  |
| Unigene115113 | Potri.001G276200.4  | 0.659   | 4.5439   | -2.7856 | Down | 1.44E-06  | 3.28E-06  |
| Unigene105649 | Potri.016G091400.1  | 0.6279  | 4.3297   | -2.7857 | Down | 1.44E-06  | 3.28E-06  |
| Unigene46755  | Potri.009G115900.2  | 0.7342  | 5.0627   | -2.7857 | Down | 1.44E-06  | 3.28E-06  |
| Unigene101851 | Potri.008G036700.8  | 0.444   | 3.0617   | -2.7857 | Down | 1.44E-06  | 3.28E-06  |
| Unigene117046 | Potri.002G189400.1  | 0.5437  | 3.7491   | -2.7857 | Down | 1.44E-06  | 3.28E-06  |
| Unigene772    | Potri.008G025300.1  | 3.956   | 27.2883  | -2.7862 | Down | 2.13E-82  | 3.60E-81  |
| Unigene1070   | Potri.T061100.1     | 2.1732  | 14.9935  | -2.7864 | Down | 1.03E-110 | 2.50E-109 |
| Unigene87281  | Potri.006G173600.1  | 38.6104 | 266.4035 | -2.7866 | Down | 0         | 0         |
| Unigene52626  | Potri.006G145200.1  | 7.0774  | 48.8405  | -2.7868 | Down | 2.62E-79  | 4.27E-78  |
| Unigene76476  | Potri.012G043200.1  | 10.5627 | 72.9024  | -2.787  | Down | 7.85E-69  | 1.08E-67  |
| Unigene8201   | Potri.007G089000.12 | 2.231   | 15.3981  | -2.787  | Down | 3.30E-35  | 2.29E-34  |

|               |                    |         |          |         |      |           |           |
|---------------|--------------------|---------|----------|---------|------|-----------|-----------|
| Unigene14202  | Potri.018G115100.3 | 1.4759  | 10.1909  | -2.7876 | Down | 1.10E-24  | 5.72E-24  |
| Unigene109279 | Potri.003G083600.1 | 2.977   | 20.5643  | -2.7882 | Down | 2.09E-19  | 9.10E-19  |
| Unigene55396  | Potri.001G447900.1 | 4.0006  | 27.6353  | -2.7882 | Down | 2.32E-37  | 1.71E-36  |
| Unigene105102 | Potri.013G002500.1 | 0.971   | 6.7078   | -2.7883 | Down | 2.09E-19  | 9.10E-19  |
| Unigene62493  | Potri.012G007900.2 | 5.247   | 36.2527  | -2.7885 | Down | 5.19E-50  | 5.07E-49  |
| Unigene78815  | Potri.010G212700.1 | 29.8084 | 205.9702 | -2.7886 | Down | 2.82E-202 | 1.49E-200 |
| Unigene3091   | Potri.006G041100.1 | 4.0361  | 27.8897  | -2.7887 | Down | 4.00E-93  | 7.80E-92  |
| Unigene31057  | Potri.002G119400.1 | 2.2629  | 15.6369  | -2.7887 | Down | 4.18E-32  | 2.69E-31  |
| Unigene181    | Potri.007G036100.1 | 4.3228  | 29.8728  | -2.7888 | Down | 2.86E-75  | 4.37E-74  |
| Unigene100447 | Potri.013G069000.1 | 1.5488  | 10.7068  | -2.7893 | Down | 4.13E-14  | 1.45E-13  |
| Unigene112690 | Potri.003G074000.1 | 1.8269  | 12.6296  | -2.7893 | Down | 4.13E-14  | 1.45E-13  |
| Unigene31476  | Potri.016G016800.1 | 3.7911  | 26.2192  | -2.7899 | Down | 2.93E-34  | 1.99E-33  |
| Unigene38425  | Potri.014G180900.1 | 4.3038  | 29.7728  | -2.7903 | Down | 1.06E-61  | 1.30E-60  |
| Unigene94762  | Potri.010G134100.1 | 1.9741  | 13.6563  | -2.7903 | Down | 1.43E-21  | 6.72E-21  |
| Unigene29899  | Potri.009G040600.1 | 2.9652  | 20.513   | -2.7903 | Down | 1.43E-21  | 6.72E-21  |
| Unigene39546  | Potri.002G221400.1 | 22.8191 | 157.8912 | -2.7906 | Down | 0         | 0         |
| Unigene48740  | Potri.014G039700.1 | 5.9133  | 40.9203  | -2.7908 | Down | 1.86E-56  | 2.07E-55  |
| Unigene93584  | Potri.002G228300.1 | 70.6337 | 488.831  | -2.7909 | Down | 0         | 0         |
| Unigene67916  | Potri.014G086500.1 | 4.5253  | 31.3208  | -2.791  | Down | 2.06E-36  | 1.48E-35  |
| Unigene41156  | Potri.001G114100.1 | 1.8344  | 12.6964  | -2.791  | Down | 2.06E-36  | 1.48E-35  |
| Unigene32624  | Potri.001G015200.1 | 5.5292  | 38.2809  | -2.7915 | Down | 2.90E-130 | 8.65E-129 |
| Unigene85916  | Potri.006G275000.1 | 29.5868 | 204.8764 | -2.7917 | Down | 3.36E-248 | 2.30E-246 |
| Unigene118279 | Potri.007G011700.1 | 0.6173  | 4.275    | -2.7919 | Down | 8.92E-09  | 2.37E-08  |
| Unigene118240 | Potri.005G040700.1 | 0.6217  | 4.3056   | -2.7919 | Down | 8.92E-09  | 2.37E-08  |
| Unigene23502  | Potri.003G133300.1 | 1.3571  | 9.3988   | -2.7919 | Down | 1.45E-38  | 1.10E-37  |
| Unigene38993  | Potri.019G071000.8 | 2.1698  | 15.0277  | -2.792  | Down | 9.88E-24  | 4.97E-23  |
| Unigene3922   | Potri.016G001600.1 | 1.8452  | 12.7797  | -2.792  | Down | 3.72E-31  | 2.34E-30  |
| Unigene116760 | Potri.014G094800.1 | 0.7888  | 5.4632   | -2.792  | Down | 8.92E-09  | 2.37E-08  |
| Unigene102534 | Potri.013G087100.1 | 0.967   | 6.6975   | -2.792  | Down | 8.92E-09  | 2.37E-08  |
| Unigene117329 | Potri.012G066600.3 | 2.2003  | 15.2388  | -2.792  | Down | 9.88E-24  | 4.97E-23  |
| Unigene118497 | Potri.010G174200.1 | 0.5841  | 4.0455   | -2.792  | Down | 8.92E-09  | 2.37E-08  |
| Unigene26146  | Potri.006G102800.1 | 0.8134  | 5.6334   | -2.792  | Down | 8.92E-09  | 2.37E-08  |
| Unigene14430  | Potri.005G050900.1 | 1.0834  | 7.5035   | -2.792  | Down | 8.92E-09  | 2.37E-08  |
| Unigene23532  | Potri.008G208200.1 | 30.0831 | 208.4198 | -2.7925 | Down | 0         | 0         |
| Unigene77767  | Potri.004G188600.1 | 40.8214 | 282.8487 | -2.7926 | Down | 1.47E-270 | 1.13E-268 |
| Unigene29164  | Potri.017G084700.1 | 5.4163  | 37.5383  | -2.793  | Down | 4.21E-104 | 9.44E-103 |
| Unigene84742  | Potri.015G140600.1 | 17.787  | 123.2728 | -2.793  | Down | 4.01E-143 | 1.34E-141 |
| Unigene41876  | Potri.002G066000.3 | 1.6626  | 11.526   | -2.7934 | Down | 2.88E-50  | 2.83E-49  |
| Unigene50410  | Potri.001G074400.1 | 3.6274  | 25.1476  | -2.7934 | Down | 2.88E-50  | 2.83E-49  |

|               |                     |         |          |         |      |           |           |
|---------------|---------------------|---------|----------|---------|------|-----------|-----------|
| Unigene23454  | Potri.018G151300.2  | 20.8272 | 144.422  | -2.7937 | Down | 0         | 0         |
| Unigene104195 | Potri.008G066900.1  | 0.7005  | 4.8581   | -2.7939 | Down | 1.88E-18  | 7.91E-18  |
| Unigene20130  | Potri.007G008600.14 | 12.5696 | 87.1729  | -2.7939 | Down | 9.59E-229 | 5.85E-227 |
| Unigene102424 | Potri.017G023200.1  | 1.6395  | 11.3711  | -2.794  | Down | 1.88E-18  | 7.91E-18  |
| Unigene14452  | Potri.006G105800.1  | 1.4176  | 9.8315   | -2.794  | Down | 1.88E-18  | 7.91E-18  |
| Unigene58587  | Potri.009G169900.1  | 8.4546  | 58.6704  | -2.7948 | Down | 1.24E-73  | 1.84E-72  |
| Unigene44699  | Potri.005G091500.1  | 4.2319  | 29.3702  | -2.795  | Down | 3.60E-47  | 3.32E-46  |
| Unigene45173  | Potri.001G087100.1  | 4.9275  | 34.2009  | -2.7951 | Down | 3.29E-176 | 1.45E-174 |
| Unigene47311  | Potri.016G056600.5  | 2.402   | 16.673   | -2.7952 | Down | 8.82E-76  | 1.36E-74  |
| Unigene82360  | Potri.008G146400.1  | 1.2862  | 8.93     | -2.7955 | Down | 5.73E-11  | 1.72E-10  |
| Unigene19386  | Potri.003G072200.1  | 0.778   | 5.4015   | -2.7955 | Down | 1.29E-20  | 5.85E-20  |
| Unigene117574 | Potri.002G107200.1  | 0.9073  | 6.2993   | -2.7955 | Down | 5.73E-11  | 1.73E-10  |
| Unigene118671 | Potri.010G121600.1  | 0.7142  | 4.959    | -2.7956 | Down | 5.73E-11  | 1.73E-10  |
| Unigene74206  | Potri.005G164700.1  | 14.3994 | 99.9957  | -2.7959 | Down | 1.34E-89  | 2.50E-88  |
| Unigene37158  | Potri.001G131400.1  | 12.8043 | 88.9672  | -2.7966 | Down | 6.41E-148 | 2.26E-146 |
| Unigene43908  | Potri.011G164800.1  | 1.095   | 7.6108   | -2.7971 | Down | 1.63E-34  | 1.11E-33  |
| Unigene88180  | Potri.003G105200.2  | 3.5253  | 24.5032  | -2.7972 | Down | 1.63E-34  | 1.11E-33  |
| Unigene15648  | Potri.010G100100.2  | 1.1824  | 8.2223   | -2.7978 | Down | 3.76E-13  | 1.26E-12  |
| Unigene16372  | Potri.007G036100.2  | 0.9118  | 6.3403   | -2.7978 | Down | 3.76E-13  | 1.26E-12  |
| Unigene35364  | Potri.004G132200.3  | 1.0106  | 7.0275   | -2.7978 | Down | 3.76E-13  | 1.26E-12  |
| Unigene47374  | Potri.005G167300.1  | 2.4982  | 17.3745  | -2.798  | Down | 6.68E-109 | 1.59E-107 |
| Unigene16294  | Potri.003G030900.1  | 10.1862 | 70.8486  | -2.7981 | Down | 6.86E-74  | 1.02E-72  |
| Unigene84514  | Potri.007G097100.2  | 39.5723 | 275.2471 | -2.7982 | Down | 0         | 0         |
| Unigene118346 | Potri.011G168300.1  | 4.1637  | 28.9707  | -2.7987 | Down | 1.14E-52  | 1.17E-51  |
| Unigene82507  | Potri.003G186500.1  | 8.6842  | 60.4312  | -2.7988 | Down | 1.67E-66  | 2.22E-65  |
| Unigene115581 | Potri.017G121100.3  | 1.6549  | 11.5207  | -2.7994 | Down | 2.51E-15  | 9.29E-15  |
| Unigene112792 | Potri.017G054800.1  | 3.9422  | 27.4436  | -2.7994 | Down | 2.96E-29  | 1.76E-28  |
| Unigene78994  | Potri.012G039200.1  | 36.9887 | 257.5202 | -2.7995 | Down | 1.60E-254 | 1.13E-252 |
| Unigene74439  | Potri.006G004300.1  | 20.5493 | 143.0668 | -2.7995 | Down | 3.39E-128 | 9.87E-127 |
| Unigene73390  | Potri.019G093400.1  | 30.4053 | 211.7817 | -2.8002 | Down | 1.33E-184 | 6.31E-183 |
| Unigene9279   | Potri.002G055000.1  | 2.5202  | 17.5584  | -2.8006 | Down | 1.70E-17  | 6.88E-17  |
| Unigene19176  | Potri.001G300700.1  | 0.7064  | 4.9217   | -2.8006 | Down | 1.70E-17  | 6.88E-17  |
| Unigene73664  | Potri.005G237300.1  | 13.5475 | 94.3973  | -2.8007 | Down | 1.13E-83  | 1.94E-82  |
| Unigene50180  | Potri.001G326200.2  | 3.286   | 22.8984  | -2.8008 | Down | 8.86E-102 | 1.94E-100 |
| Unigene77653  | Potri.001G148100.1  | 5.1448  | 35.8549  | -2.801  | Down | 1.02E-35  | 7.18E-35  |
| Unigene34691  | Potri.003G071700.8  | 12.2576 | 85.4409  | -2.8013 | Down | 0         | 0         |
| Unigene9701   | Potri.001G141400.1  | 0.7331  | 5.1103   | -2.8013 | Down | 1.16E-19  | 5.09E-19  |
| Unigene33275  | Potri.003G174900.1  | 3.5293  | 24.6032  | -2.8014 | Down | 5.07E-56  | 5.59E-55  |
| Unigene51739  | Potri.010G039000.1  | 1.544   | 10.7686  | -2.8021 | Down | 7.94E-22  | 3.75E-21  |

|               |                     |         |          |         |      |           |           |
|---------------|---------------------|---------|----------|---------|------|-----------|-----------|
| Unigene87426  | Potri.007G091100.1  | 73.6548 | 513.8874 | -2.8026 | Down | 0         | 0         |
| Unigene22659  | Potri.006G123900.1  | 8.5648  | 59.7585  | -2.8027 | Down | 6.40E-248 | 4.37E-246 |
| Unigene22811  | Potri.018G085400.3  | 3.0767  | 21.4695  | -2.8028 | Down | 4.71E-71  | 6.72E-70  |
| Unigene36065  | Potri.T051500.1     | 2.6343  | 18.3833  | -2.8029 | Down | 1.25E-48  | 1.19E-47  |
| Unigene2139   | Potri.016G133500.1  | 15.0325 | 104.9203 | -2.8031 | Down | 0         | 0         |
| Unigene17297  | Potri.008G009300.1  | 1.5741  | 10.9864  | -2.8031 | Down | 3.80E-26  | 2.06E-25  |
| Unigene40487  | Potri.007G043300.2  | 2.9582  | 20.6469  | -2.8031 | Down | 3.80E-26  | 2.06E-25  |
| Unigene35239  | Potri.017G063700.1  | 0.7078  | 4.9403   | -2.8032 | Down | 3.80E-26  | 2.06E-25  |
| Unigene12714  | Potri.010G063000.1  | 1.2969  | 9.0542   | -2.8035 | Down | 2.64E-28  | 1.53E-27  |
| Unigene58760  | Potri.008G164400.1  | 4.3294  | 30.2286  | -2.8037 | Down | 3.18E-57  | 3.60E-56  |
| Unigene29333  | Potri.011G151400.1  | 1.2237  | 8.5448   | -2.8038 | Down | 1.84E-30  | 1.13E-29  |
| Unigene33573  | Potri.014G023100.1  | 4.3441  | 30.3406  | -2.8041 | Down | 1.15E-63  | 1.45E-62  |
| Unigene89361  | Potri.014G024700.1  | 7.3756  | 51.537   | -2.8048 | Down | 1.51E-76  | 2.36E-75  |
| Unigene10128  | Potri.011G106600.7  | 1.4997  | 10.4813  | -2.8051 | Down | 2.22E-43  | 1.88E-42  |
| Unigene48184  | Potri.012G034300.1  | 7.5655  | 52.8852  | -2.8054 | Down | 1.11E-47  | 1.03E-46  |
| Unigene32834  | Potri.001G020300.12 | 10.2659 | 71.7804  | -2.8057 | Down | 0         | 0         |
| Unigene75992  | Potri.005G214200.1  | 82.4253 | 577.1241 | -2.8077 | Down | 0         | 0         |
| Unigene105532 | Potri.014G076400.8  | 0.5695  | 3.9878   | -2.8078 | Down | 1.40E-05  | 2.92E-05  |
| Unigene95327  | Potri.001G416100.2  | 0.5921  | 4.1461   | -2.8078 | Down | 1.40E-05  | 2.91E-05  |
| Unigene105675 | Potri.001G080200.1  | 0.5024  | 3.5179   | -2.8078 | Down | 1.40E-05  | 2.92E-05  |
| Unigene109984 | Potri.019G029600.3  | 0.6813  | 4.7708   | -2.8079 | Down | 1.40E-05  | 2.92E-05  |
| Unigene98960  | Potri.019G002800.2  | 0.5291  | 3.705    | -2.8079 | Down | 1.40E-05  | 2.91E-05  |
| Unigene27180  | Potri.018G149900.2  | 0.6     | 4.2017   | -2.8079 | Down | 8.37E-08  | 2.09E-07  |
| Unigene9968   | Potri.016G022200.1  | 1.3088  | 9.165    | -2.8079 | Down | 3.44E-12  | 1.10E-11  |
| Unigene110090 | Potri.015G077100.1  | 0.6782  | 4.7492   | -2.8079 | Down | 1.40E-05  | 2.92E-05  |
| Unigene22439  | Potri.014G072600.1  | 1.1865  | 8.3087   | -2.8079 | Down | 1.04E-18  | 4.42E-18  |
| Unigene8737   | Potri.013G106700.1  | 0.8198  | 5.7407   | -2.8079 | Down | 8.37E-08  | 2.08E-07  |
| Unigene107116 | Potri.013G106200.1  | 0.6196  | 4.3389   | -2.8079 | Down | 3.44E-12  | 1.10E-11  |
| Unigene102679 | Potri.013G013000.1  | 0.6721  | 4.7064   | -2.8079 | Down | 8.37E-08  | 2.09E-07  |
| Unigene112708 | Potri.012G034100.2  | 0.6065  | 4.2472   | -2.8079 | Down | 1.40E-05  | 2.92E-05  |
| Unigene52395  | Potri.012G007400.1  | 1.3088  | 9.165    | -2.8079 | Down | 1.54E-16  | 5.98E-16  |
| Unigene114948 | Potri.011G152400.1  | 2.6738  | 18.7243  | -2.8079 | Down | 4.91E-23  | 2.41E-22  |
| Unigene15658  | Potri.011G045600.1  | 0.8913  | 6.2414   | -2.8079 | Down | 4.91E-23  | 2.41E-22  |
| Unigene118454 | Potri.011G009700.2  | 0.5052  | 3.5377   | -2.8079 | Down | 8.37E-08  | 2.09E-07  |
| Unigene101612 | Potri.010G087900.1  | 0.6661  | 4.6644   | -2.8079 | Down | 8.37E-08  | 2.09E-07  |
| Unigene105645 | Potri.010G071500.1  | 0.4454  | 3.1189   | -2.8079 | Down | 1.40E-05  | 2.92E-05  |
| Unigene103452 | Potri.009G090300.2  | 1.6764  | 11.7395  | -2.8079 | Down | 1.04E-18  | 4.42E-18  |
| Unigene114851 | Potri.008G045300.1  | 1.6159  | 11.3157  | -2.8079 | Down | 2.28E-14  | 8.09E-14  |
| Unigene106166 | Potri.007G064100.2  | 1.4556  | 10.1933  | -2.8079 | Down | 2.36E-27  | 1.32E-26  |

|               |                    |         |          |         |      |           |           |
|---------------|--------------------|---------|----------|---------|------|-----------|-----------|
| Unigene47700  | Potri.005G149900.1 | 0.5588  | 3.9132   | -2.8079 | Down | 1.40E-05  | 2.92E-05  |
| Unigene11842  | Potri.005G035200.1 | 1.8752  | 13.1316  | -2.8079 | Down | 2.12E-100 | 4.55E-99  |
| Unigene48158  | Potri.003G183100.1 | 0.486   | 3.4033   | -2.8079 | Down | 1.40E-05  | 2.92E-05  |
| Unigene115862 | Potri.003G179700.1 | 0.4957  | 3.4711   | -2.8079 | Down | 1.40E-05  | 2.92E-05  |
| Unigene111713 | Potri.003G106600.1 | 0.6349  | 4.446    | -2.8079 | Down | 1.40E-05  | 2.92E-05  |
| Unigene106714 | Potri.003G096900.1 | 0.5291  | 3.705    | -2.8079 | Down | 8.37E-08  | 2.09E-07  |
| Unigene98338  | Potri.003G081000.2 | 0.7841  | 5.4908   | -2.8079 | Down | 1.54E-16  | 5.98E-16  |
| Unigene99560  | Potri.002G213500.2 | 0.4577  | 3.205    | -2.8079 | Down | 1.40E-05  | 2.91E-05  |
| Unigene43266  | Potri.001G461700.1 | 1.6473  | 11.5358  | -2.8079 | Down | 9.83E-47  | 8.97E-46  |
| Unigene75249  | Potri.001G375800.1 | 18.6498 | 130.6019 | -2.8079 | Down | 1.07E-119 | 2.86E-118 |
| Unigene92995  | Potri.001G084400.1 | 27.3863 | 191.7825 | -2.8079 | Down | 0         | 0         |
| Unigene30225  | Potri.001G032800.1 | 3.2135  | 22.5037  | -2.8079 | Down | 1.15E-31  | 7.29E-31  |
| Unigene27167  | Potri.018G000800.2 | 0.7915  | 5.5428   | -2.808  | Down | 5.29E-10  | 1.51E-09  |
| Unigene105972 | Potri.017G074200.6 | 0.7803  | 5.4645   | -2.808  | Down | 3.44E-12  | 1.10E-11  |
| Unigene116544 | Potri.016G043900.1 | 0.4619  | 3.2347   | -2.808  | Down | 1.40E-05  | 2.92E-05  |
| Unigene104936 | Potri.014G072600.1 | 0.5709  | 3.998    | -2.808  | Down | 8.37E-08  | 2.09E-07  |
| Unigene108764 | Potri.013G139800.1 | 1.0657  | 7.463    | -2.808  | Down | 8.37E-08  | 2.09E-07  |
| Unigene107907 | Potri.010G151400.1 | 1.097   | 7.6825   | -2.808  | Down | 8.37E-08  | 2.09E-07  |
| Unigene116735 | Potri.009G060900.1 | 1.3563  | 9.4983   | -2.808  | Down | 2.28E-14  | 8.09E-14  |
| Unigene116845 | Potri.009G025300.1 | 0.4467  | 3.1282   | -2.808  | Down | 1.40E-05  | 2.92E-05  |
| Unigene26992  | Potri.008G106000.1 | 0.7535  | 5.2768   | -2.808  | Down | 8.37E-08  | 2.09E-07  |
| Unigene103205 | Potri.008G080500.1 | 0.5465  | 3.8272   | -2.808  | Down | 1.40E-05  | 2.92E-05  |
| Unigene3882   | Potri.008G024500.3 | 1.5681  | 10.9815  | -2.808  | Down | 1.54E-16  | 5.98E-16  |
| Unigene112955 | Potri.007G112900.1 | 0.6016  | 4.213    | -2.808  | Down | 1.40E-05  | 2.92E-05  |
| Unigene117286 | Potri.007G003900.2 | 1.4751  | 10.3301  | -2.808  | Down | 1.54E-16  | 5.98E-16  |
| Unigene111986 | Potri.006G061100.1 | 0.9403  | 6.585    | -2.808  | Down | 8.37E-08  | 2.09E-07  |
| Unigene113832 | Potri.005G236000.2 | 0.5738  | 4.0185   | -2.808  | Down | 1.40E-05  | 2.92E-05  |
| Unigene102366 | Potri.004G195800.1 | 1.0541  | 7.3818   | -2.808  | Down | 1.64E-29  | 9.83E-29  |
| Unigene80216  | Potri.003G090000.2 | 6.3424  | 44.4152  | -2.808  | Down | 9.83E-47  | 8.97E-46  |
| Unigene117438 | Potri.002G003800.1 | 0.6182  | 4.3293   | -2.808  | Down | 8.37E-08  | 2.09E-07  |
| Unigene114358 | Potri.001G300700.1 | 0.5567  | 3.8986   | -2.808  | Down | 1.40E-05  | 2.92E-05  |
| Unigene35445  | Potri.001G262500.1 | 1.1922  | 8.349    | -2.808  | Down | 1.54E-16  | 5.98E-16  |
| Unigene53328  | Potri.001G164900.1 | 0.8907  | 6.2377   | -2.808  | Down | 5.29E-10  | 1.51E-09  |
| Unigene104579 | Potri.002G170600.2 | 0.4721  | 3.3064   | -2.8081 | Down | 8.37E-08  | 2.09E-07  |
| Unigene40284  | Potri.003G133600.2 | 11.2396 | 78.763   | -2.8089 | Down | 4.83E-123 | 1.34E-121 |
| Unigene19582  | Potri.008G032900.1 | 27.572  | 193.2361 | -2.8091 | Down | 0         | 0         |
| Unigene12543  | Potri.009G125600.1 | 8.4317  | 59.1231  | -2.8098 | Down | 1.57E-128 | 4.60E-127 |
| Unigene22820  | Potri.003G124600.1 | 0.901   | 6.319    | -2.8101 | Down | 1.11E-58  | 1.29E-57  |
| Unigene98150  | Potri.001G405500.1 | 1.895   | 13.2955  | -2.8107 | Down | 8.71E-46  | 7.78E-45  |

|               |                    |         |          |         |      |           |           |
|---------------|--------------------|---------|----------|---------|------|-----------|-----------|
| Unigene38167  | Potri.T011100.1    | 1.7165  | 12.0456  | -2.811  | Down | 1.74E-41  | 1.42E-40  |
| Unigene63604  | Potri.017G032900.1 | 8.5829  | 60.2346  | -2.8111 | Down | 7.24E-117 | 1.89E-115 |
| Unigene27337  | Potri.008G041400.1 | 6.7001  | 47.0316  | -2.8114 | Down | 3.81E-106 | 8.75E-105 |
| Unigene50403  | Potri.011G161600.1 | 1.2357  | 8.678    | -2.812  | Down | 1.02E-30  | 6.32E-30  |
| Unigene32474  | Potri.003G056000.1 | 6.2987  | 44.2416  | -2.8123 | Down | 1.59E-194 | 7.98E-193 |
| Unigene473    | Potri.015G095500.2 | 5.5915  | 39.2872  | -2.8128 | Down | 0         | 0         |
| Unigene17664  | Potri.001G036800.2 | 5.3633  | 37.69    | -2.813  | Down | 3.86E-49  | 3.70E-48  |
| Unigene39382  | Potri.019G053700.1 | 2.1715  | 15.2759  | -2.8145 | Down | 2.20E-38  | 1.66E-37  |
| Unigene5713   | Potri.008G204200.1 | 12.2412 | 86.1112  | -2.8145 | Down | 1.56E-93  | 3.06E-92  |
| Unigene41180  | Potri.005G038700.3 | 1.1508  | 8.0954   | -2.8145 | Down | 6.41E-20  | 2.84E-19  |
| Unigene11146  | Potri.001G102200.1 | 7.1533  | 50.3347  | -2.8149 | Down | 1.28E-243 | 8.58E-242 |
| Unigene41825  | Potri.011G055900.1 | 2.5224  | 17.7509  | -2.815  | Down | 1.72E-52  | 1.77E-51  |
| Unigene30564  | Potri.018G038600.1 | 1.442   | 10.1499  | -2.8153 | Down | 9.40E-18  | 3.85E-17  |
| Unigene26010  | Potri.012G104000.1 | 0.8439  | 5.9399   | -2.8153 | Down | 9.40E-18  | 3.85E-17  |
| Unigene25478  | Potri.008G095800.1 | 1.1981  | 8.4329   | -2.8153 | Down | 9.40E-18  | 3.85E-17  |
| Unigene23785  | Potri.005G047400.1 | 1.0637  | 7.487    | -2.8153 | Down | 9.40E-18  | 3.85E-17  |
| Unigene13764  | Potri.005G024200.2 | 7.4298  | 52.3003  | -2.8154 | Down | 1.06E-161 | 4.20E-160 |
| Unigene11935  | Potri.008G042300.6 | 2.8227  | 19.8754  | -2.8158 | Down | 2.75E-62  | 3.40E-61  |
| Unigene14579  | Potri.018G121600.2 | 3.6138  | 25.446   | -2.8159 | Down | 6.35E-32  | 4.07E-31  |
| Unigene36364  | Potri.001G070300.1 | 12.7466 | 89.7695  | -2.8161 | Down | 1.51E-265 | 1.13E-263 |
| Unigene61586  | Potri.019G103900.3 | 3.4884  | 24.5737  | -2.8165 | Down | 9.09E-30  | 5.48E-29  |
| Unigene52912  | Potri.008G049600.1 | 1.5692  | 11.0542  | -2.8165 | Down | 1.39E-15  | 5.20E-15  |
| Unigene916    | Potri.010G172700.1 | 0.6726  | 4.7401   | -2.8171 | Down | 1.30E-27  | 7.39E-27  |
| Unigene23640  | Potri.003G103600.1 | 2.0684  | 14.5835  | -2.8177 | Down | 2.80E-99  | 5.96E-98  |
| Unigene119121 | Potri.017G067400.2 | 0.7014  | 4.9459   | -2.8179 | Down | 2.08E-13  | 7.06E-13  |
| Unigene51997  | Potri.013G019800.3 | 0.6793  | 4.7903   | -2.818  | Down | 2.08E-13  | 7.06E-13  |
| Unigene41067  | Potri.006G241200.1 | 1.5965  | 11.2581  | -2.818  | Down | 2.08E-13  | 7.06E-13  |
| Unigene117174 | Potri.005G112900.6 | 1.179   | 8.3142   | -2.818  | Down | 2.08E-13  | 7.06E-13  |
| Unigene30940  | Potri.002G025100.2 | 0.6671  | 4.7046   | -2.8181 | Down | 2.08E-13  | 7.06E-13  |
| Unigene22403  | Potri.005G175800.1 | 4.6303  | 32.6563  | -2.8182 | Down | 8.11E-236 | 5.15E-234 |
| Unigene487    | Potri.001G118500.1 | 22.5189 | 158.8215 | -2.8182 | Down | 0         | 0         |
| Unigene99025  | Potri.013G071900.1 | 2.0084  | 14.1679  | -2.8185 | Down | 3.02E-47  | 2.79E-46  |
| Unigene27494  | Potri.018G087500.5 | 1.708   | 12.0496  | -2.8186 | Down | 2.77E-35  | 1.94E-34  |
| Unigene34470  | Potri.002G202000.2 | 1.5866  | 11.1942  | -2.8187 | Down | 4.80E-57  | 5.40E-56  |
| Unigene38439  | Potri.008G089800.1 | 2.8606  | 20.1832  | -2.8188 | Down | 4.80E-57  | 5.40E-56  |
| Unigene76703  | Potri.002G093100.2 | 26.2904 | 185.5246 | -2.819  | Down | 2.53E-175 | 1.11E-173 |
| Unigene19362  | Potri.005G252800.1 | 2.0699  | 14.6087  | -2.8192 | Down | 6.75E-55  | 7.27E-54  |
| Unigene63187  | Potri.014G024700.1 | 4.5834  | 32.3525  | -2.8194 | Down | 3.95E-33  | 2.62E-32  |
| Unigene21437  | Potri.008G155800.1 | 5.0897  | 35.9425  | -2.82   | Down | 1.49E-150 | 5.36E-149 |

|               |                    |         |          |         |      |           |           |
|---------------|--------------------|---------|----------|---------|------|-----------|-----------|
| Unigene35911  | Potri.010G244100.1 | 2.472   | 17.459   | -2.8202 | Down | 1.34E-50  | 1.33E-49  |
| Unigene7046   | Potri.009G005400.1 | 3.8884  | 27.4625  | -2.8202 | Down | 2.14E-60  | 2.56E-59  |
| Unigene36443  | Potri.005G180100.2 | 0.9248  | 6.5315   | -2.8202 | Down | 3.16E-11  | 9.66E-11  |
| Unigene45696  | Potri.010G183900.1 | 1.3803  | 9.7489   | -2.8203 | Down | 1.34E-50  | 1.33E-49  |
| Unigene30557  | Potri.009G020400.2 | 0.852   | 6.0176   | -2.8203 | Down | 3.16E-11  | 9.66E-11  |
| Unigene37208  | Potri.005G018700.1 | 24.8289 | 175.3866 | -2.8204 | Down | 8.21E-242 | 5.41E-240 |
| Unigene56098  | Potri.005G023300.1 | 3.6028  | 25.4582  | -2.8209 | Down | 1.22E-38  | 9.23E-38  |
| Unigene105787 | Potri.001G160300.1 | 1.2466  | 8.8107   | -2.8213 | Down | 8.10E-29  | 4.76E-28  |
| Unigene32798  | Potri.018G073600.1 | 2.4799  | 17.5299  | -2.8215 | Down | 2.27E-108 | 5.38E-107 |
| Unigene58177  | Potri.010G199300.1 | 7.3567  | 52.0044  | -2.8215 | Down | 9.58E-64  | 1.22E-62  |
| Unigene63327  | Potri.017G035500.1 | 13.7519 | 97.2157  | -2.8216 | Down | 1.40E-160 | 5.47E-159 |
| Unigene1860   | Potri.008G131600.1 | 4.6049  | 32.5781  | -2.8227 | Down | 2.46E-34  | 1.68E-33  |
| Unigene12244  | Potri.005G090300.3 | 10.505  | 74.3534  | -2.8233 | Down | 5.98E-174 | 2.59E-172 |
| Unigene99452  | Potri.T157500.1    | 0.6972  | 4.936    | -2.8237 | Down | 8.49E-17  | 3.34E-16  |
| Unigene14000  | Potri.014G112200.3 | 0.4756  | 3.3671   | -2.8237 | Down | 4.92E-09  | 1.33E-08  |
| Unigene95442  | Potri.008G097400.1 | 0.5732  | 4.0582   | -2.8237 | Down | 8.49E-17  | 3.34E-16  |
| Unigene11265  | Potri.007G001000.1 | 1.3616  | 9.6435   | -2.8243 | Down | 2.70E-68  | 3.69E-67  |
| Unigene42873  | Potri.005G090100.2 | 1.6147  | 11.438   | -2.8245 | Down | 2.37E-45  | 2.09E-44  |
| Unigene94595  | Potri.006G218800.1 | 1.2706  | 9.0044   | -2.8251 | Down | 7.43E-51  | 7.38E-50  |
| Unigene53272  | Potri.008G036300.3 | 2.4438  | 17.3212  | -2.8253 | Down | 2.43E-22  | 1.17E-21  |
| Unigene18746  | Potri.003G036900.1 | 1.3372  | 9.4776   | -2.8253 | Down | 2.43E-22  | 1.17E-21  |
| Unigene37798  | Potri.014G175200.5 | 11.7625 | 83.3718  | -2.8254 | Down | 8.91E-85  | 1.56E-83  |
| Unigene65560  | Potri.009G151400.5 | 7.8961  | 55.9838  | -2.8258 | Down | 1.63E-116 | 4.22E-115 |
| Unigene23554  | Potri.014G194900.5 | 2.6456  | 18.7614  | -2.8261 | Down | 3.01E-101 | 6.53E-100 |
| Unigene28719  | Potri.015G105400.1 | 1.3543  | 9.6055   | -2.8263 | Down | 7.22E-28  | 4.12E-27  |
| Unigene19637  | Potri.008G077500.1 | 0.5052  | 3.5831   | -2.8263 | Down | 1.26E-14  | 4.53E-14  |
| Unigene118775 | Potri.001G126100.1 | 0.9172  | 6.5054   | -2.8263 | Down | 1.26E-14  | 4.53E-14  |
| Unigene34684  | Potri.003G137000.1 | 1.4879  | 10.5576  | -2.8269 | Down | 3.33E-65  | 4.34E-64  |
| Unigene33515  | Potri.010G048300.1 | 4.2132  | 29.9053  | -2.8274 | Down | 3.41E-76  | 5.29E-75  |
| Unigene32126  | Potri.008G166300.1 | 11.3635 | 80.6551  | -2.8274 | Down | 0         | 0         |
| Unigene101684 | Potri.016G041000.1 | 1.0811  | 7.677    | -2.828  | Down | 1.04E-25  | 5.56E-25  |
| Unigene50595  | Potri.015G029000.1 | 2.2854  | 16.2321  | -2.8283 | Down | 1.59E-90  | 3.00E-89  |
| Unigene43098  | Potri.006G003600.1 | 10.8702 | 77.213   | -2.8285 | Down | 2.85E-225 | 1.71E-223 |
| Unigene43785  | Potri.015G095000.3 | 6.2224  | 44.215   | -2.829  | Down | 6.54E-197 | 3.33E-195 |
| Unigene45983  | Potri.012G007600.1 | 4.5725  | 32.4913  | -2.829  | Down | 2.32E-99  | 4.95E-98  |
| Unigene34231  | Potri.014G014000.1 | 43.2704 | 307.5042 | -2.8292 | Down | 0         | 0         |
| Unigene2613   | Potri.005G259600.1 | 5.0151  | 35.6545  | -2.8297 | Down | 2.03E-212 | 1.13E-210 |
| Unigene117199 | Potri.001G256100.3 | 0.5329  | 3.7889   | -2.8298 | Down | 7.94E-07  | 1.84E-06  |
| Unigene40608  | Potri.018G151900.2 | 1.5329  | 10.8995  | -2.8299 | Down | 5.20E-18  | 2.15E-17  |

|               |                    |         |          |         |      |           |           |
|---------------|--------------------|---------|----------|---------|------|-----------|-----------|
| Unigene112875 | Potri.015G007700.1 | 0.7551  | 5.3689   | -2.8299 | Down | 7.94E-07  | 1.84E-06  |
| Unigene46438  | Potri.011G101400.1 | 0.5997  | 4.264    | -2.8299 | Down | 7.94E-07  | 1.84E-06  |
| Unigene15114  | Potri.011G082100.2 | 0.6217  | 4.4204   | -2.8299 | Down | 7.94E-07  | 1.84E-06  |
| Unigene97787  | Potri.011G027000.1 | 0.5902  | 4.1966   | -2.8299 | Down | 7.94E-07  | 1.84E-06  |
| Unigene101855 | Potri.010G186500.1 | 0.7401  | 5.2623   | -2.8299 | Down | 7.94E-07  | 1.84E-06  |
| Unigene53630  | Potri.008G181200.2 | 0.818   | 5.8163   | -2.8299 | Down | 7.94E-07  | 1.84E-06  |
| Unigene112463 | Potri.006G239100.2 | 0.7675  | 5.4573   | -2.8299 | Down | 7.94E-07  | 1.84E-06  |
| Unigene15856  | Potri.001G213600.2 | 0.477   | 3.3916   | -2.8299 | Down | 7.94E-07  | 1.84E-06  |
| Unigene86744  | Potri.T172000.4    | 2.4459  | 17.3916  | -2.83   | Down | 1.50E-23  | 7.51E-23  |
| Unigene45693  | Potri.T105800.1    | 1.0822  | 7.695    | -2.83   | Down | 1.36E-34  | 9.35E-34  |
| Unigene119330 | Potri.017G085000.1 | 0.8097  | 5.7574   | -2.83   | Down | 5.20E-18  | 2.15E-17  |
| Unigene5758   | Potri.014G049000.1 | 7.5529  | 53.7055  | -2.83   | Down | 4.21E-73  | 6.21E-72  |
| Unigene114771 | Potri.009G162100.1 | 0.6757  | 4.8048   | -2.83   | Down | 7.94E-07  | 1.84E-06  |
| Unigene105502 | Potri.009G026000.2 | 0.6933  | 4.9298   | -2.83   | Down | 7.94E-07  | 1.84E-06  |
| Unigene19225  | Potri.008G121000.2 | 1.4401  | 10.2402  | -2.83   | Down | 1.90E-12  | 6.17E-12  |
| Unigene106946 | Potri.005G097800.1 | 0.7836  | 5.5719   | -2.83   | Down | 1.90E-12  | 6.17E-12  |
| Unigene15671  | Potri.002G233300.1 | 0.5283  | 3.7567   | -2.83   | Down | 7.94E-07  | 1.84E-06  |
| Unigene116597 | Potri.001G025400.1 | 0.5756  | 4.0929   | -2.83   | Down | 7.94E-07  | 1.84E-06  |
| Unigene105497 | Potri.001G001000.1 | 0.6322  | 4.4953   | -2.83   | Down | 7.94E-07  | 1.84E-06  |
| Unigene117594 | Potri.019G019700.1 | 0.5013  | 3.5648   | -2.8301 | Down | 7.94E-07  | 1.84E-06  |
| Unigene95080  | Potri.015G079400.1 | 0.6175  | 4.3911   | -2.8301 | Down | 7.94E-07  | 1.84E-06  |
| Unigene3884   | Potri.005G137400.6 | 0.6343  | 4.5106   | -2.8301 | Down | 7.94E-07  | 1.84E-06  |
| Unigene803    | Potri.008G151900.1 | 2.6741  | 19.0246  | -2.8307 | Down | 3.34E-129 | 9.84E-128 |
| Unigene21532  | Potri.010G132700.1 | 2.3278  | 16.564   | -2.831  | Down | 5.81E-49  | 5.54E-48  |
| Unigene22525  | Potri.002G050800.1 | 2.358   | 16.7823  | -2.8313 | Down | 5.97E-38  | 4.46E-37  |
| Unigene10224  | Potri.012G081300.1 | 1.1363  | 8.0903   | -2.8318 | Down | 6.44E-27  | 3.57E-26  |
| Unigene93822  | Potri.003G018900.1 | 23.5486 | 167.6544 | -2.8318 | Down | 0         | 0         |
| Unigene43973  | Potri.005G019100.1 | 1.9085  | 13.5888  | -2.8319 | Down | 2.58E-52  | 2.64E-51  |
| Unigene43750  | Potri.003G160500.4 | 6.2479  | 44.4871  | -2.8319 | Down | 4.62E-148 | 1.63E-146 |
| Unigene30459  | Potri.011G066500.1 | 1.4887  | 10.6032  | -2.8324 | Down | 2.18E-21  | 1.02E-20  |
| Unigene75274  | Potri.010G002500.7 | 21.3625 | 152.1558 | -2.8324 | Down | 1.97E-140 | 6.46E-139 |
| Unigene31605  | Potri.005G211400.2 | 14.622  | 104.1461 | -2.8324 | Down | 2.10E-239 | 1.37E-237 |
| Unigene25358  | Potri.001G201500.4 | 1.6194  | 11.5378  | -2.8328 | Down | 8.50E-36  | 6.02E-35  |
| Unigene11023  | Potri.015G095500.2 | 13.8315 | 98.5519  | -2.8329 | Down | 0         | 0         |
| Unigene19824  | Potri.012G071600.4 | 1.7195  | 12.2551  | -2.8333 | Down | 7.68E-16  | 2.90E-15  |
| Unigene102942 | Potri.008G064100.1 | 1.1856  | 8.4497   | -2.8333 | Down | 7.68E-16  | 2.90E-15  |
| Unigene118484 | Potri.004G142100.1 | 1.0872  | 7.7487   | -2.8333 | Down | 7.68E-16  | 2.90E-15  |
| Unigene111974 | Potri.003G194700.1 | 2.0374  | 14.5207  | -2.8333 | Down | 7.68E-16  | 2.90E-15  |
| Unigene100042 | Potri.013G146800.1 | 0.5586  | 3.9815   | -2.8334 | Down | 7.68E-16  | 2.90E-15  |



|               |                    |         |          |         |      |           |           |
|---------------|--------------------|---------|----------|---------|------|-----------|-----------|
| Unigene24610  | Potri.010G108500.2 | 1.1224  | 7.9998   | -2.8334 | Down | 2.78E-30  | 1.70E-29  |
| Unigene13930  | Potri.016G113100.1 | 2.8998  | 20.6703  | -2.8335 | Down | 3.37E-82  | 5.68E-81  |
| Unigene74634  | Potri.009G067700.3 | 25.6112 | 182.5927 | -2.8338 | Down | 5.66E-166 | 2.32E-164 |
| Unigene303    | Potri.015G146400.1 | 11.4176 | 81.407   | -2.8339 | Down | 0         | 0         |
| Unigene17955  | Potri.018G141600.1 | 0.5886  | 4.2008   | -2.8353 | Down | 2.92E-10  | 8.44E-10  |
| Unigene107100 | Potri.005G203500.1 | 0.5154  | 3.6784   | -2.8353 | Down | 2.92E-10  | 8.44E-10  |
| Unigene106747 | Potri.014G089600.1 | 0.7832  | 5.5901   | -2.8354 | Down | 2.92E-10  | 8.44E-10  |
| Unigene77679  | Potri.013G115800.1 | 2.5724  | 18.3605  | -2.8354 | Down | 3.19E-19  | 1.38E-18  |
| Unigene110361 | Potri.012G115500.1 | 2.6762  | 19.1015  | -2.8354 | Down | 3.19E-19  | 1.38E-18  |
| Unigene117324 | Potri.004G223900.1 | 0.8382  | 5.9826   | -2.8354 | Down | 2.92E-10  | 8.44E-10  |
| Unigene32230  | Potri.006G054700.1 | 2.7971  | 19.9718  | -2.836  | Down | 6.86E-236 | 4.36E-234 |
| Unigene47732  | Potri.014G175100.1 | 0.8685  | 6.2051   | -2.8369 | Down | 1.35E-22  | 6.51E-22  |
| Unigene28847  | Potri.003G152600.3 | 1.1125  | 7.9487   | -2.8369 | Down | 1.35E-22  | 6.51E-22  |
| Unigene178    | Potri.007G145200.1 | 3.73    | 26.6522  | -2.837  | Down | 3.57E-152 | 1.31E-150 |
| Unigene87969  | Potri.019G093400.1 | 89.7485 | 641.3559 | -2.8372 | Down | 0         | 0         |
| Unigene107214 | Potri.014G178500.3 | 0.4998  | 3.5731   | -2.8378 | Down | 1.15E-13  | 3.95E-13  |
| Unigene115611 | Potri.013G021700.1 | 1.4003  | 10.012   | -2.8379 | Down | 1.15E-13  | 3.95E-13  |
| Unigene50617  | Potri.008G041400.1 | 1.6919  | 12.097   | -2.8379 | Down | 5.75E-26  | 3.10E-25  |
| Unigene19635  | Potri.006G274800.1 | 1.2358  | 8.8359   | -2.8379 | Down | 1.15E-13  | 3.95E-13  |
| Unigene61721  | Potri.006G007200.1 | 1.7239  | 12.3257  | -2.8379 | Down | 1.15E-13  | 3.95E-13  |
| Unigene58788  | Potri.001G257700.1 | 0.9432  | 6.7437   | -2.8379 | Down | 1.15E-13  | 3.95E-13  |
| Unigene37174  | Potri.012G033500.3 | 0.9367  | 6.6975   | -2.838  | Down | 1.15E-13  | 3.95E-13  |
| Unigene23700  | Potri.002G260100.2 | 14.2647 | 101.9998 | -2.838  | Down | 3.13E-151 | 1.14E-149 |
| Unigene20408  | Potri.007G002500.1 | 3.7886  | 27.0911  | -2.8381 | Down | 6.58E-252 | 4.57E-250 |
| Unigene47660  | Potri.019G063100.3 | 10.9705 | 78.4793  | -2.8387 | Down | 7.38E-85  | 1.30E-83  |
| Unigene11914  | Potri.018G030500.3 | 14.8377 | 106.1496 | -2.8388 | Down | 5.65E-282 | 4.57E-280 |
| Unigene84150  | Potri.006G111600.1 | 22.9744 | 164.3808 | -2.8389 | Down | 3.88E-190 | 1.90E-188 |
| Unigene94666  | Potri.T108400.1    | 0.6963  | 4.983    | -2.8392 | Down | 4.69E-17  | 1.87E-16  |
| Unigene53496  | Potri.014G112700.2 | 5.1448  | 36.8199  | -2.8393 | Down | 1.08E-32  | 7.04E-32  |
| Unigene50907  | Potri.009G001700.2 | 1.473   | 10.5422  | -2.8393 | Down | 1.08E-32  | 7.04E-32  |
| Unigene76498  | Potri.001G454500.1 | 7.4269  | 53.1654  | -2.8397 | Down | 1.26E-51  | 1.27E-50  |
| Unigene26425  | Potri.015G079400.1 | 2.0162  | 14.4359  | -2.84   | Down | 5.61E-55  | 6.05E-54  |
| Unigene62051  | Potri.014G077500.1 | 1.2733  | 9.1183   | -2.8402 | Down | 1.96E-20  | 8.85E-20  |
| Unigene362    | Potri.001G442600.3 | 8.486   | 60.7755  | -2.8403 | Down | 0         | 0         |
| Unigene49923  | Potri.001G068600.1 | 5.0576  | 36.2263  | -2.8405 | Down | 7.37E-144 | 2.49E-142 |
| Unigene81295  | Potri.005G063300.4 | 65.3111 | 467.9273 | -2.8409 | Down | 0         | 0         |
| Unigene105564 | Potri.002G055000.2 | 1.0448  | 7.4855   | -2.8409 | Down | 8.30E-24  | 4.18E-23  |
| Unigene100897 | Potri.019G000800.1 | 2.4562  | 17.6003  | -2.8411 | Down | 1.78E-49  | 1.72E-48  |
| Unigene85915  | Potri.004G228300.1 | 63.346  | 454.0247 | -2.8414 | Down | 0         | 0         |

|               |                    |         |          |         |      |          |          |
|---------------|--------------------|---------|----------|---------|------|----------|----------|
| Unigene37012  | Potri.017G028300.3 | 55.5865 | 398.4121 | -2.8415 | Down | 0        | 0        |
| Unigene36613  | Potri.004G071600.4 | 5.4084  | 38.7787  | -2.842  | Down | 6.70E-34 | 4.51E-33 |
| Unigene45461  | Potri.002G006100.1 | 4.1801  | 30.0003  | -2.8434 | Down | 3.95E-74 | 5.92E-73 |
| Unigene58138  | Potri.003G121700.1 | 5.633   | 40.4312  | -2.8435 | Down | 3.59E-84 | 6.23E-83 |
| Unigene109929 | Potri.013G067300.6 | 0.511   | 3.6699   | -2.8443 | Down | 1.38E-04 | 2.61E-04 |
| Unigene114128 | Potri.004G233700.1 | 0.4223  | 3.0328   | -2.8443 | Down | 1.38E-04 | 2.61E-04 |
| Unigene108530 | Potri.015G134100.1 | 0.538   | 3.864    | -2.8444 | Down | 1.38E-04 | 2.61E-04 |
| Unigene37624  | Potri.015G029000.1 | 0.9476  | 6.8058   | -2.8444 | Down | 1.83E-38 | 1.38E-37 |
| Unigene4210   | Potri.011G077800.1 | 0.7158  | 5.141    | -2.8444 | Down | 1.74E-11 | 5.39E-11 |
| Unigene8976   | Potri.010G093100.4 | 0.8564  | 6.1508   | -2.8444 | Down | 1.74E-11 | 5.39E-11 |
| Unigene117948 | Potri.009G150400.1 | 0.8499  | 6.1041   | -2.8444 | Down | 1.74E-11 | 5.39E-11 |
| Unigene62972  | Potri.008G103000.2 | 0.7691  | 5.5237   | -2.8444 | Down | 4.60E-08 | 1.17E-07 |
| Unigene104416 | Potri.008G095400.2 | 0.4191  | 3.0101   | -2.8444 | Down | 4.60E-08 | 1.17E-07 |
| Unigene103012 | Potri.005G010800.2 | 0.5157  | 3.7037   | -2.8444 | Down | 1.38E-04 | 2.61E-04 |
| Unigene5321   | Potri.001G146600.1 | 0.6217  | 4.465    | -2.8444 | Down | 4.60E-08 | 1.17E-07 |
| Unigene113115 | Potri.001G098100.1 | 0.4476  | 3.2148   | -2.8444 | Down | 1.38E-04 | 2.61E-04 |
| Unigene106879 | Potri.018G141300.1 | 0.4672  | 3.3558   | -2.8445 | Down | 4.60E-08 | 1.17E-07 |
| Unigene14643  | Potri.017G035500.1 | 2.4614  | 17.6788  | -2.8445 | Down | 3.55E-45 | 3.12E-44 |
| Unigene26366  | Potri.017G007900.1 | 0.5133  | 3.6867   | -2.8445 | Down | 1.38E-04 | 2.61E-04 |
| Unigene105669 | Potri.016G038100.7 | 0.8759  | 6.2912   | -2.8445 | Down | 6.96E-15 | 2.52E-14 |
| Unigene31088  | Potri.015G072900.1 | 1.488   | 10.6876  | -2.8445 | Down | 2.87E-18 | 1.20E-17 |
| Unigene96272  | Potri.015G040100.1 | 2.1728  | 15.6059  | -2.8445 | Down | 1.21E-21 | 5.67E-21 |
| Unigene23215  | Potri.014G001000.3 | 2.1941  | 15.7589  | -2.8445 | Down | 2.21E-28 | 1.28E-27 |
| Unigene98027  | Potri.012G092400.1 | 1.0081  | 7.2406   | -2.8445 | Down | 4.60E-08 | 1.17E-07 |
| Unigene116614 | Potri.010G248900.2 | 0.6886  | 4.9459   | -2.8445 | Down | 4.60E-08 | 1.17E-07 |
| Unigene71129  | Potri.010G223400.1 | 2.2158  | 15.9149  | -2.8445 | Down | 6.96E-15 | 2.52E-14 |
| Unigene95596  | Potri.009G153300.1 | 0.5133  | 3.6867   | -2.8445 | Down | 1.38E-04 | 2.61E-04 |
| Unigene33441  | Potri.009G048300.1 | 4.2659  | 30.6397  | -2.8445 | Down | 3.55E-45 | 3.12E-44 |
| Unigene110416 | Potri.009G024000.1 | 0.5018  | 3.6041   | -2.8445 | Down | 1.38E-04 | 2.61E-04 |
| Unigene22960  | Potri.006G232700.1 | 1.0111  | 7.2624   | -2.8445 | Down | 1.21E-21 | 5.67E-21 |
| Unigene104589 | Potri.006G134500.1 | 0.5897  | 4.2356   | -2.8445 | Down | 6.96E-15 | 2.52E-14 |
| Unigene5383   | Potri.005G203100.1 | 0.5354  | 3.8455   | -2.8445 | Down | 1.38E-04 | 2.61E-04 |
| Unigene115590 | Potri.003G107900.1 | 1.5276  | 10.9721  | -2.8445 | Down | 6.96E-15 | 2.52E-14 |
| Unigene51587  | Potri.003G053800.3 | 0.788   | 5.6599   | -2.8445 | Down | 4.60E-08 | 1.17E-07 |
| Unigene31532  | Potri.002G046300.1 | 1.4309  | 10.2775  | -2.8445 | Down | 2.87E-18 | 1.20E-17 |
| Unigene25830  | Potri.001G466800.1 | 0.6304  | 4.5279   | -2.8445 | Down | 4.60E-08 | 1.17E-07 |
| Unigene105345 | Potri.001G090400.1 | 1.0159  | 7.2969   | -2.8445 | Down | 5.13E-25 | 2.69E-24 |
| Unigene104350 | Potri.013G073400.1 | 0.4341  | 3.1182   | -2.8446 | Down | 6.96E-15 | 2.52E-14 |
| Unigene111088 | Potri.010G030000.1 | 0.4886  | 3.5096   | -2.8446 | Down | 1.38E-04 | 2.61E-04 |

|               |                     |         |          |         |      |           |           |
|---------------|---------------------|---------|----------|---------|------|-----------|-----------|
| Unigene117877 | Potri.009G070800.2  | 0.5738  | 4.1216   | -2.8446 | Down | 4.60E-08  | 1.17E-07  |
| Unigene25039  | Potri.009G067700.3  | 0.5086  | 3.6532   | -2.8446 | Down | 1.38E-04  | 2.61E-04  |
| Unigene113256 | Potri.006G124200.1  | 0.444   | 3.1893   | -2.8446 | Down | 1.38E-04  | 2.61E-04  |
| Unigene113431 | Potri.004G053900.1  | 0.4405  | 3.1642   | -2.8446 | Down | 1.38E-04  | 2.61E-04  |
| Unigene20628  | Potri.016G016400.1  | 8.4373  | 60.6153  | -2.8448 | Down | 5.60E-227 | 3.38E-225 |
| Unigene8006   | Potri.005G131300.1  | 9.1406  | 65.6782  | -2.8451 | Down | 4.36E-140 | 1.43E-138 |
| Unigene44128  | Potri.003G086000.1  | 9.2811  | 66.6923  | -2.8452 | Down | 5.03E-120 | 1.36E-118 |
| Unigene48103  | Potri.011G058100.3  | 12.1941 | 87.6347  | -2.8453 | Down | 1.30E-96  | 2.66E-95  |
| Unigene15593  | Potri.006G098300.1  | 13.2103 | 94.9375  | -2.8453 | Down | 1.30E-96  | 2.66E-95  |
| Unigene2356   | Potri.008G007500.1  | 3.7244  | 26.7702  | -2.8455 | Down | 1.56E-76  | 2.44E-75  |
| Unigene22289  | Potri.012G080600.1  | 1.6135  | 11.6057  | -2.8466 | Down | 1.14E-39  | 8.87E-39  |
| Unigene42372  | Potri.003G073700.4  | 6.1544  | 44.2898  | -2.8473 | Down | 5.85E-260 | 4.26E-258 |
| Unigene44394  | Potri.009G134000.2  | 17.5573 | 126.3564 | -2.8474 | Down | 2.81E-253 | 1.97E-251 |
| Unigene31008  | Potri.002G155500.1  | 2.063   | 14.8472  | -2.8474 | Down | 1.37E-29  | 8.22E-29  |
| Unigene34376  | Potri.004G138200.1  | 19.7844 | 142.4054 | -2.8476 | Down | 0         | 0         |
| Unigene11364  | Potri.010G192400.1  | 6.3163  | 45.4859  | -2.8483 | Down | 4.18E-108 | 9.84E-107 |
| Unigene103387 | Potri.005G232900.1  | 1.3668  | 9.8429   | -2.8483 | Down | 3.14E-44  | 2.70E-43  |
| Unigene94824  | Potri.005G131300.1  | 1.589   | 11.4429  | -2.8483 | Down | 7.43E-23  | 3.63E-22  |
| Unigene24753  | Potri.006G048500.1  | 0.5357  | 3.8598   | -2.849  | Down | 1.76E-19  | 7.68E-19  |
| Unigene28058  | Potri.003G050100.1  | 1.2988  | 9.3576   | -2.849  | Down | 1.62E-37  | 1.20E-36  |
| Unigene33534  | Potri.015G054600.1  | 21.462  | 154.6811 | -2.8494 | Down | 0         | 0         |
| Unigene9280   | Potri.015G070000.2  | 13.2353 | 95.4274  | -2.85   | Down | 4.09E-162 | 1.63E-160 |
| Unigene51261  | Potri.013G095200.1  | 0.8963  | 6.4623   | -2.85   | Down | 4.24E-16  | 1.62E-15  |
| Unigene20135  | Potri.001G291700.1  | 3.8484  | 27.7469  | -2.85   | Down | 1.96E-45  | 1.74E-44  |
| Unigene101365 | Potri.T161700.1     | 1.0775  | 7.7691   | -2.8501 | Down | 4.24E-16  | 1.62E-15  |
| Unigene105009 | Potri.018G113000.1  | 1.068   | 7.7007   | -2.8501 | Down | 4.24E-16  | 1.62E-15  |
| Unigene33560  | Potri.001G352700.4  | 4.0081  | 28.9051  | -2.8503 | Down | 1.07E-56  | 1.20E-55  |
| Unigene24406  | Potri.018G151600.1  | 2.799   | 20.1909  | -2.8507 | Down | 2.41E-53  | 2.53E-52  |
| Unigene79511  | Potri.015G095500.2  | 31.905  | 230.1516 | -2.8507 | Down | 5.28E-234 | 3.31E-232 |
| Unigene83430  | Potri.005G051000.1  | 3.1892  | 23.0057  | -2.8507 | Down | 1.97E-27  | 1.11E-26  |
| Unigene102949 | Potri.019G021200.1  | 2.9537  | 21.3137  | -2.8512 | Down | 5.43E-50  | 5.30E-49  |
| Unigene42686  | Potri.006G170900.1  | 3.3862  | 24.4403  | -2.8515 | Down | 3.82E-151 | 1.39E-149 |
| Unigene38679  | Potri.018G021100.2  | 1.0627  | 7.6707   | -2.8516 | Down | 1.05E-12  | 3.44E-12  |
| Unigene25530  | Potri.014G036500.1  | 0.6882  | 4.9675   | -2.8516 | Down | 1.05E-12  | 3.44E-12  |
| Unigene14633  | Potri.008G202500.1  | 2.6643  | 19.2315  | -2.8516 | Down | 4.58E-24  | 2.33E-23  |
| Unigene10310  | Potri.007G114500.1  | 0.921   | 6.6479   | -2.8516 | Down | 1.05E-12  | 3.44E-12  |
| Unigene118121 | Potri.017G057400.5  | 0.9142  | 6.599    | -2.8517 | Down | 1.05E-12  | 3.44E-12  |
| Unigene103592 | Potri.013G010500.2  | 0.5828  | 4.2069   | -2.8517 | Down | 1.05E-12  | 3.44E-12  |
| Unigene57282  | Potri.009G053700.19 | 1.8019  | 13.0068  | -2.8517 | Down | 1.05E-12  | 3.44E-12  |

|               |                    |         |          |         |      |           |           |
|---------------|--------------------|---------|----------|---------|------|-----------|-----------|
| Unigene89577  | Potri.006G121700.1 | 66.9106 | 483.006  | -2.8517 | Down | 0         | 0         |
| Unigene119423 | Potri.001G371200.2 | 0.9713  | 7.0115   | -2.8517 | Down | 4.58E-24  | 2.33E-23  |
| Unigene68473  | Potri.002G104700.4 | 4.1074  | 29.6605  | -2.8522 | Down | 2.77E-43  | 2.35E-42  |
| Unigene10073  | Potri.019G092000.1 | 3.3458  | 24.1645  | -2.8525 | Down | 5.28E-32  | 3.39E-31  |
| Unigene23829  | Potri.009G029600.2 | 10.05   | 72.595   | -2.8527 | Down | 0         | 0         |
| Unigene47298  | Potri.003G052400.1 | 8.3069  | 60.0146  | -2.8529 | Down | 4.22E-59  | 4.94E-58  |
| Unigene31507  | Potri.016G013500.1 | 1.4281  | 10.3178  | -2.853  | Down | 1.08E-20  | 4.92E-20  |
| Unigene12589  | Potri.004G038300.2 | 2.4482  | 17.6877  | -2.853  | Down | 6.30E-40  | 4.93E-39  |
| Unigene65386  | Potri.019G041900.1 | 7.1425  | 51.6209  | -2.8535 | Down | 8.48E-83  | 1.44E-81  |
| Unigene72236  | Potri.010G001400.3 | 1.2675  | 9.1685   | -2.8547 | Down | 2.70E-09  | 7.41E-09  |
| Unigene42813  | Potri.001G081900.1 | 2.1668  | 15.6739  | -2.8547 | Down | 3.28E-33  | 2.18E-32  |
| Unigene97054  | Potri.005G117100.1 | 0.6729  | 4.8678   | -2.8548 | Down | 2.70E-09  | 7.41E-09  |
| Unigene18233  | Potri.015G144100.1 | 1.4905  | 10.7874  | -2.8555 | Down | 1.08E-45  | 9.65E-45  |
| Unigene13014  | Potri.T077100.1    | 2.7344  | 19.7934  | -2.8557 | Down | 5.88E-74  | 8.78E-73  |
| Unigene21315  | Potri.019G057900.1 | 7.9467  | 57.5323  | -2.8559 | Down | 0         | 0         |
| Unigene40835  | Potri.013G000200.1 | 1.6008  | 11.5899  | -2.856  | Down | 3.72E-58  | 4.28E-57  |
| Unigene1395   | Potri.017G112900.1 | 6.1066  | 44.2156  | -2.8561 | Down | 4.68E-127 | 1.35E-125 |
| Unigene117209 | Potri.006G172900.1 | 4.5825  | 33.1815  | -2.8562 | Down | 3.00E-50  | 2.95E-49  |
| Unigene7870   | Potri.003G018500.1 | 10.6189 | 76.921   | -2.8567 | Down | 1.82E-226 | 1.10E-224 |
| Unigene6392   | Potri.001G253000.1 | 12.295  | 89.0772  | -2.857  | Down | 8.07E-203 | 4.26E-201 |
| Unigene45381  | Potri.015G080200.1 | 1.3043  | 9.4513   | -2.8572 | Down | 8.23E-72  | 1.19E-70  |
| Unigene91318  | Potri.006G173600.1 | 28.5126 | 206.6254 | -2.8573 | Down | 0         | 0         |
| Unigene26825  | Potri.016G131400.3 | 3.6633  | 26.5509  | -2.8575 | Down | 1.88E-51  | 1.89E-50  |
| Unigene21062  | Potri.011G136100.1 | 1.5281  | 11.0753  | -2.8575 | Down | 1.75E-26  | 9.59E-26  |
| Unigene42123  | Potri.001G086100.2 | 3.2563  | 23.6008  | -2.8575 | Down | 5.57E-39  | 4.27E-38  |
| Unigene69059  | Potri.002G254600.3 | 1.3857  | 10.0463  | -2.858  | Down | 5.23E-56  | 5.77E-55  |
| Unigene45565  | Potri.014G152000.3 | 1.6852  | 12.225   | -2.8588 | Down | 1.58E-18  | 6.66E-18  |
| Unigene119206 | Potri.003G201800.3 | 0.8995  | 6.5253   | -2.8588 | Down | 1.58E-18  | 6.66E-18  |
| Unigene46220  | Potri.001G088200.1 | 0.7936  | 5.757    | -2.8588 | Down | 1.58E-18  | 6.66E-18  |
| Unigene20930  | Potri.001G036800.2 | 4.8441  | 35.1403  | -2.8588 | Down | 1.27E-35  | 8.96E-35  |
| Unigene9848   | Potri.016G016300.1 | 1.3761  | 9.9878   | -2.8596 | Down | 9.57E-45  | 8.35E-44  |
| Unigene44820  | Potri.019G091300.1 | 6.5285  | 47.4064  | -2.8603 | Down | 8.43E-172 | 3.60E-170 |
| Unigene12869  | Potri.008G009300.1 | 0.8622  | 6.2617   | -2.8605 | Down | 2.92E-32  | 1.89E-31  |
| Unigene46698  | Potri.003G201400.1 | 10.3425 | 75.1226  | -2.8607 | Down | 1.53E-177 | 6.81E-176 |
| Unigene32567  | Potri.001G029300.1 | 1.1012  | 8.0017   | -2.8612 | Down | 4.61E-55  | 4.99E-54  |
| Unigene16586  | Potri.018G050300.1 | 8.0198  | 58.2808  | -2.8614 | Down | 4.39E-122 | 1.21E-120 |
| Unigene53978  | Potri.004G069000.1 | 10.5715 | 76.8247  | -2.8614 | Down | 4.39E-122 | 1.21E-120 |
| Unigene61349  | Potri.017G110800.3 | 0.7005  | 5.0939   | -2.8623 | Down | 7.64E-06  | 1.64E-05  |
| Unigene110388 | Potri.011G131300.1 | 0.6691  | 4.8655   | -2.8623 | Down | 7.64E-06  | 1.64E-05  |

|               |                     |         |          |         |      |           |           |
|---------------|---------------------|---------|----------|---------|------|-----------|-----------|
| Unigene106146 | Potri.010G068200.2  | 0.4577  | 3.3282   | -2.8623 | Down | 7.64E-06  | 1.64E-05  |
| Unigene100002 | Potri.009G044900.1  | 0.5526  | 4.0185   | -2.8623 | Down | 7.64E-06  | 1.64E-05  |
| Unigene114916 | Potri.008G095700.4  | 0.5348  | 3.8889   | -2.8623 | Down | 7.64E-06  | 1.64E-05  |
| Unigene37748  | Potri.008G079500.1  | 0.7314  | 5.3186   | -2.8623 | Down | 7.64E-06  | 1.64E-05  |
| Unigene108354 | Potri.006G083700.3  | 0.7208  | 5.2415   | -2.8623 | Down | 7.64E-06  | 1.64E-05  |
| Unigene9159   | Potri.004G141000.4  | 1.3088  | 9.5175   | -2.8623 | Down | 2.53E-24  | 1.30E-23  |
| Unigene95617  | Potri.004G012000.2  | 0.6813  | 4.9543   | -2.8623 | Down | 7.64E-06  | 1.64E-05  |
| Unigene105970 | Potri.001G467300.1  | 0.4251  | 3.0912   | -2.8623 | Down | 7.64E-06  | 1.64E-05  |
| Unigene49384  | Potri.001G168100.1  | 0.7751  | 5.6364   | -2.8623 | Down | 1.60E-10  | 4.71E-10  |
| Unigene4937   | Potri.T172000.4     | 1.4142  | 10.2844  | -2.8624 | Down | 1.60E-10  | 4.71E-10  |
| Unigene105360 | Potri.017G022500.2  | 0.9354  | 6.8025   | -2.8624 | Down | 1.60E-10  | 4.71E-10  |
| Unigene111823 | Potri.015G126900.1  | 0.6322  | 4.5975   | -2.8624 | Down | 7.64E-06  | 1.64E-05  |
| Unigene3901   | Potri.014G024000.4  | 0.7957  | 5.7867   | -2.8624 | Down | 1.60E-10  | 4.71E-10  |
| Unigene36007  | Potri.010G180800.1  | 1.8069  | 13.1401  | -2.8624 | Down | 1.81E-33  | 1.21E-32  |
| Unigene96000  | Potri.010G124300.1  | 0.6631  | 4.8222   | -2.8624 | Down | 7.64E-06  | 1.64E-05  |
| Unigene16618  | Potri.008G057900.3  | 0.6349  | 4.617    | -2.8624 | Down | 1.60E-10  | 4.71E-10  |
| Unigene13195  | Potri.005G214400.5  | 0.4312  | 3.1358   | -2.8624 | Down | 1.60E-10  | 4.71E-10  |
| Unigene104993 | Potri.001G372000.1  | 0.6191  | 4.5021   | -2.8624 | Down | 1.60E-10  | 4.71E-10  |
| Unigene109880 | Potri.001G055000.1  | 0.6844  | 4.9771   | -2.8624 | Down | 7.64E-06  | 1.64E-05  |
| Unigene104171 | Potri.011G105800.1  | 0.7497  | 5.4523   | -2.8625 | Down | 1.60E-10  | 4.71E-10  |
| Unigene114562 | Potri.005G055900.1  | 0.5485  | 3.989    | -2.8625 | Down | 7.64E-06  | 1.64E-05  |
| Unigene113796 | Potri.004G132600.1  | 0.5738  | 4.1731   | -2.8625 | Down | 7.64E-06  | 1.64E-05  |
| Unigene95764  | Potri.002G011500.1  | 0.9185  | 6.6799   | -2.8625 | Down | 1.81E-33  | 1.21E-32  |
| Unigene66711  | Potri.019G050100.3  | 7.5667  | 55.0509  | -2.863  | Down | 2.05E-98  | 4.32E-97  |
| Unigene85393  | Potri.008G171000.1  | 31.7305 | 230.9254 | -2.8635 | Down | 2.37E-280 | 1.90E-278 |
| Unigene5536   | Potri.006G098300.1  | 10.1372 | 73.7896  | -2.8638 | Down | 1.60E-90  | 3.02E-89  |
| Unigene1519   | Potri.010G046300.1  | 9.2352  | 67.2329  | -2.864  | Down | 5.35E-119 | 1.43E-117 |
| Unigene27910  | Potri.011G027500.1  | 1.717   | 12.5021  | -2.8642 | Down | 1.13E-34  | 7.74E-34  |
| Unigene61753  | Potri.016G011400.1  | 4.2004  | 30.5914  | -2.8645 | Down | 4.17E-30  | 2.54E-29  |
| Unigene87850  | Potri.010G114200.1  | 13.0491 | 95.0511  | -2.8648 | Down | 1.73E-130 | 5.18E-129 |
| Unigene86397  | Potri.008G139700.12 | 10.9049 | 79.4359  | -2.8648 | Down | 5.12E-102 | 1.12E-100 |
| Unigene51966  | Potri.002G168400.1  | 6.6288  | 48.2862  | -2.8648 | Down | 4.45E-78  | 7.09E-77  |
| Unigene52413  | Potri.011G018300.1  | 1.0894  | 7.9364   | -2.865  | Down | 1.56E-25  | 8.31E-25  |
| Unigene50044  | Potri.014G114100.1  | 9.5496  | 69.5979  | -2.8655 | Down | 1.54E-195 | 7.77E-194 |
| Unigene71966  | Potri.001G333900.1  | 3.0931  | 22.5429  | -2.8655 | Down | 5.96E-21  | 2.73E-20  |
| Unigene47658  | Potri.008G175000.1  | 13.3862 | 97.5926  | -2.866  | Down | 2.96E-119 | 7.90E-118 |
| Unigene49380  | Potri.015G046700.1  | 1.6056  | 11.7096  | -2.8665 | Down | 2.33E-16  | 9.02E-16  |
| Unigene37542  | Potri.006G222200.2  | 1.4055  | 10.2501  | -2.8665 | Down | 2.33E-16  | 9.02E-16  |
| Unigene64666  | Potri.001G326700.2  | 2.046   | 14.9211  | -2.8665 | Down | 2.33E-16  | 9.02E-16  |

|               |                    |         |          |         |      |           |           |
|---------------|--------------------|---------|----------|---------|------|-----------|-----------|
| Unigene23653  | Potri.014G118600.1 | 18.9215 | 138.0131 | -2.8667 | Down | 0         | 0         |
| Unigene13707  | Potri.005G145400.8 | 5.9744  | 43.5775  | -2.8667 | Down | 3.12E-86  | 5.58E-85  |
| Unigene18038  | Potri.016G057400.1 | 6.5412  | 47.7166  | -2.8669 | Down | 2.55E-151 | 9.27E-150 |
| Unigene101164 | Potri.002G028300.1 | 1.3362  | 9.7481   | -2.867  | Down | 1.20E-41  | 9.76E-41  |
| Unigene1934   | Potri.010G191000.1 | 2.4206  | 17.6625  | -2.8673 | Down | 5.73E-52  | 5.82E-51  |
| Unigene17     | Potri.004G040300.1 | 6.3319  | 46.2044  | -2.8673 | Down | 1.09E-137 | 3.49E-136 |
| Unigene8101   | Potri.009G139600.1 | 5.9793  | 43.6362  | -2.8675 | Down | 9.95E-98  | 2.07E-96  |
| Unigene39470  | Potri.015G022500.1 | 3.0606  | 22.3392  | -2.8677 | Down | 1.11E-209 | 6.12E-208 |
| Unigene102995 | Potri.017G125500.1 | 1.0036  | 7.3282   | -2.8683 | Down | 3.66E-22  | 1.75E-21  |
| Unigene62510  | Potri.011G081200.4 | 4.2315  | 30.8987  | -2.8683 | Down | 1.61E-32  | 1.05E-31  |
| Unigene51247  | Potri.008G095800.1 | 0.8012  | 5.8504   | -2.8683 | Down | 9.58E-12  | 3.00E-11  |
| Unigene107707 | Potri.006G248700.1 | 4.9856  | 36.4054  | -2.8683 | Down | 1.61E-32  | 1.05E-31  |
| Unigene53705  | Potri.004G025900.2 | 12.1336 | 88.6011  | -2.8683 | Down | 2.20E-94  | 4.38E-93  |
| Unigene5874   | Potri.003G121500.1 | 5.8894  | 43.0052  | -2.8683 | Down | 7.47E-43  | 6.26E-42  |
| Unigene42328  | Potri.002G230200.1 | 0.751   | 5.4839   | -2.8683 | Down | 9.58E-12  | 3.00E-11  |
| Unigene24991  | Potri.011G116900.1 | 1.4164  | 10.343   | -2.8684 | Down | 9.58E-12  | 3.00E-11  |
| Unigene104176 | Potri.006G225400.1 | 0.9403  | 6.8664   | -2.8684 | Down | 9.58E-12  | 3.00E-11  |
| Unigene51199  | Potri.019G131300.1 | 24.2881 | 177.3926 | -2.8686 | Down | 0         | 0         |
| Unigene15460  | Potri.014G106000.1 | 15.5942 | 113.8959 | -2.8686 | Down | 1.34E-255 | 9.50E-254 |
| Unigene22509  | Potri.014G109800.1 | 9.3593  | 68.4088  | -2.8697 | Down | 2.68E-235 | 1.69E-233 |
| Unigene6983   | Potri.009G011700.3 | 3.6512  | 26.6873  | -2.8697 | Down | 3.93E-60  | 4.68E-59  |
| Unigene35260  | Potri.001G133800.1 | 0.7223  | 5.2802   | -2.8699 | Down | 1.42E-17  | 5.78E-17  |
| Unigene22661  | Potri.002G169900.3 | 8.1539  | 59.6236  | -2.8703 | Down | 1.76E-109 | 4.22E-108 |
| Unigene12242  | Potri.005G064200.1 | 4.0094  | 29.3208  | -2.8705 | Down | 2.16E-77  | 3.41E-76  |
| Unigene16627  | Potri.019G097000.3 | 2.1673  | 15.8529  | -2.8708 | Down | 2.26E-23  | 1.12E-22  |
| Unigene39770  | Potri.017G041600.3 | 6.2364  | 45.6243  | -2.871  | Down | 3.58E-122 | 9.85E-121 |
| Unigene11691  | Potri.005G237300.2 | 18.0438 | 132.0164 | -2.8711 | Down | 0         | 0         |
| Unigene23745  | Potri.005G064200.1 | 3.1083  | 22.7451  | -2.8714 | Down | 1.25E-117 | 3.29E-116 |
| Unigene26957  | Potri.005G040000.1 | 2.4866  | 18.1988  | -2.8716 | Down | 6.22E-35  | 4.30E-34  |
| Unigene32852  | Potri.001G247000.1 | 2.1742  | 15.9125  | -2.8716 | Down | 7.31E-135 | 2.28E-133 |
| Unigene93874  | Potri.006G004300.1 | 33.7659 | 247.2146 | -2.8721 | Down | 0         | 0         |
| Unigene115820 | Potri.004G090800.2 | 0.6217  | 4.5543   | -2.8729 | Down | 4.35E-07  | 1.03E-06  |
| Unigene117851 | Potri.004G018600.1 | 0.4807  | 3.5214   | -2.8729 | Down | 4.35E-07  | 1.03E-06  |
| Unigene102870 | Potri.002G185000.1 | 0.5138  | 3.7639   | -2.8729 | Down | 4.35E-07  | 1.03E-06  |
| Unigene20893  | Potri.014G132800.2 | 0.6155  | 4.5092   | -2.873  | Down | 4.35E-07  | 1.03E-06  |
| Unigene103538 | Potri.012G111600.1 | 0.6521  | 4.7773   | -2.873  | Down | 4.35E-07  | 1.03E-06  |
| Unigene110132 | Potri.010G125900.1 | 0.8439  | 6.1823   | -2.873  | Down | 4.35E-07  | 1.03E-06  |
| Unigene15596  | Potri.009G096600.1 | 1.711   | 12.5348  | -2.873  | Down | 5.76E-13  | 1.91E-12  |
| Unigene14286  | Potri.007G104300.1 | 3.9263  | 28.7641  | -2.873  | Down | 3.46E-59  | 4.05E-58  |

|               |                    |         |          |         |      |           |           |
|---------------|--------------------|---------|----------|---------|------|-----------|-----------|
| Unigene20045  | Potri.002G017500.1 | 1.1003  | 8.0607   | -2.873  | Down | 5.76E-13  | 1.91E-12  |
| Unigene52484  | Potri.001G373500.1 | 2.887   | 21.1501  | -2.873  | Down | 2.30E-30  | 1.41E-29  |
| Unigene3814   | Potri.T014300.1    | 0.8634  | 6.3254   | -2.8731 | Down | 4.35E-07  | 1.03E-06  |
| Unigene118316 | Potri.018G103800.4 | 0.8735  | 6.3995   | -2.8731 | Down | 5.76E-13  | 1.91E-12  |
| Unigene109463 | Potri.016G006500.1 | 0.8674  | 6.3549   | -2.8731 | Down | 4.35E-07  | 1.03E-06  |
| Unigene102707 | Potri.013G016900.5 | 0.752   | 5.5093   | -2.8731 | Down | 4.35E-07  | 1.03E-06  |
| Unigene37360  | Potri.008G079400.1 | 0.6831  | 5.0048   | -2.8731 | Down | 4.35E-07  | 1.03E-06  |
| Unigene6125   | Potri.002G238200.1 | 0.8735  | 6.3995   | -2.8731 | Down | 5.76E-13  | 1.91E-12  |
| Unigene114226 | Potri.001G131100.1 | 0.7011  | 5.1365   | -2.8731 | Down | 4.35E-07  | 1.03E-06  |
| Unigene64965  | Potri.001G065600.2 | 0.5359  | 3.9261   | -2.8731 | Down | 4.35E-07  | 1.03E-06  |
| Unigene116733 | Potri.007G017900.4 | 0.5651  | 4.1403   | -2.8732 | Down | 4.35E-07  | 1.03E-06  |
| Unigene94557  | Potri.004G214000.3 | 0.444   | 3.2531   | -2.8732 | Down | 4.35E-07  | 1.03E-06  |
| Unigene21769  | Potri.004G073100.1 | 5.8143  | 42.6081  | -2.8735 | Down | 1.24E-123 | 3.47E-122 |
| Unigene11676  | Potri.004G216100.2 | 4.5796  | 33.5634  | -2.8736 | Down | 3.76E-89  | 6.98E-88  |
| Unigene2956   | Potri.010G129500.1 | 2.4866  | 18.2346  | -2.8744 | Down | 2.41E-37  | 1.77E-36  |
| Unigene82099  | Potri.012G043200.1 | 37.4436 | 274.6248 | -2.8747 | Down | 6.37E-301 | 5.67E-299 |
| Unigene27081  | Potri.002G033100.1 | 2.921   | 21.424   | -2.8747 | Down | 1.43E-31  | 9.05E-31  |
| Unigene6237   | Potri.005G207200.1 | 30.0166 | 220.212  | -2.8751 | Down | 0         | 0         |
| Unigene2656   | Potri.005G127100.2 | 6.1379  | 45.0459  | -2.8756 | Down | 1.40E-136 | 4.45E-135 |
| Unigene29576  | Potri.014G174400.1 | 1.9993  | 14.674   | -2.8757 | Down | 1.50E-38  | 1.14E-37  |
| Unigene105714 | Potri.008G085200.1 | 1.7149  | 12.5867  | -2.8757 | Down | 5.34E-20  | 2.38E-19  |
| Unigene80747  | Potri.001G070700.1 | 2.3872  | 17.5207  | -2.8757 | Down | 5.34E-20  | 2.38E-19  |
| Unigene32434  | Potri.018G106600.1 | 1.0691  | 7.8493   | -2.8762 | Down | 8.86E-33  | 5.81E-32  |
| Unigene15995  | Potri.005G214100.1 | 38.5913 | 283.384  | -2.8764 | Down | 2.78E-277 | 2.20E-275 |
| Unigene95919  | Potri.001G107200.1 | 0.4412  | 3.2407   | -2.8768 | Down | 3.48E-14  | 1.22E-13  |
| Unigene38294  | Potri.012G058200.1 | 1.2586  | 9.2451   | -2.8769 | Down | 3.48E-14  | 1.22E-13  |
| Unigene28396  | Potri.006G044500.1 | 0.7998  | 5.875    | -2.8769 | Down | 5.32E-27  | 2.96E-26  |
| Unigene48266  | Potri.001G126200.1 | 0.8656  | 6.3584   | -2.8769 | Down | 3.48E-14  | 1.22E-13  |
| Unigene119022 | Potri.002G237500.1 | 0.7473  | 5.4898   | -2.877  | Down | 3.48E-14  | 1.22E-13  |
| Unigene76914  | Potri.006G051100.1 | 71.4908 | 525.2277 | -2.8771 | Down | 0         | 0         |
| Unigene27729  | Potri.003G100500.1 | 4.8307  | 35.4927  | -2.8772 | Down | 3.71E-72  | 5.39E-71  |
| Unigene33564  | Potri.009G011700.2 | 13.9961 | 102.8379 | -2.8773 | Down | 1.45E-232 | 9.04E-231 |
| Unigene18422  | Potri.019G081800.1 | 2.1247  | 15.6163  | -2.8777 | Down | 1.09E-53  | 1.15E-52  |
| Unigene83964  | Potri.010G141400.2 | 45.0589 | 331.1613 | -2.8777 | Down | 0         | 0         |
| Unigene26423  | Potri.010G110700.1 | 2.8983  | 21.3145  | -2.8786 | Down | 3.30E-28  | 1.90E-27  |
| Unigene34090  | Potri.004G063900.1 | 2.4409  | 17.956   | -2.879  | Down | 9.18E-76  | 1.41E-74  |
| Unigene62713  | Potri.001G125800.1 | 9.1298  | 67.1715  | -2.8792 | Down | 4.27E-137 | 1.36E-135 |
| Unigene118494 | Potri.005G086200.3 | 0.5007  | 3.6859   | -2.88   | Down | 2.52E-08  | 6.51E-08  |
| Unigene97368  | Potri.002G173300.1 | 0.6661  | 4.9036   | -2.88   | Down | 2.52E-08  | 6.51E-08  |

|               |                     |         |         |         |      |           |           |
|---------------|---------------------|---------|---------|---------|------|-----------|-----------|
| Unigene116305 | Potri.001G119000.1  | 0.7105  | 5.2305  | -2.88   | Down | 2.52E-08  | 6.51E-08  |
| Unigene117906 | Potri.019G070300.1  | 0.5709  | 4.203   | -2.8801 | Down | 2.52E-08  | 6.51E-08  |
| Unigene5855   | Potri.017G075600.1  | 0.7964  | 5.8633  | -2.8801 | Down | 2.02E-22  | 9.71E-22  |
| Unigene115454 | Potri.015G105400.1  | 0.7744  | 5.701   | -2.8801 | Down | 2.52E-08  | 6.51E-08  |
| Unigene88865  | Potri.012G050700.1  | 4.5806  | 33.7227 | -2.8801 | Down | 2.45E-50  | 2.41E-49  |
| Unigene118798 | Potri.011G128900.2  | 0.9079  | 6.6839  | -2.8801 | Down | 2.11E-15  | 7.82E-15  |
| Unigene117012 | Potri.010G026800.4  | 0.6563  | 4.8317  | -2.8801 | Down | 2.52E-08  | 6.51E-08  |
| Unigene112074 | Potri.008G010400.13 | 0.9364  | 6.8937  | -2.8801 | Down | 2.52E-08  | 6.51E-08  |
| Unigene15396  | Potri.006G265700.1  | 1.0507  | 7.7352  | -2.8801 | Down | 2.52E-08  | 6.51E-08  |
| Unigene78540  | Potri.006G080700.2  | 2.8329  | 20.8556 | -2.8801 | Down | 2.02E-22  | 9.71E-22  |
| Unigene94793  | Potri.005G139500.1  | 0.706   | 5.1975  | -2.8801 | Down | 2.52E-08  | 6.51E-08  |
| Unigene41965  | Potri.004G085500.1  | 1.1936  | 8.7872  | -2.8801 | Down | 2.11E-15  | 7.82E-15  |
| Unigene102622 | Potri.003G196900.2  | 0.5905  | 4.3472  | -2.8801 | Down | 2.52E-08  | 6.51E-08  |
| Unigene61502  | Potri.001G422000.1  | 2.9973  | 22.066  | -2.8801 | Down | 2.02E-22  | 9.71E-22  |
| Unigene101883 | Potri.001G395100.1  | 0.5354  | 3.9416  | -2.8801 | Down | 2.52E-08  | 6.51E-08  |
| Unigene52340  | Potri.001G365800.1  | 0.7908  | 5.8219  | -2.8801 | Down | 2.52E-08  | 6.51E-08  |
| Unigene118220 | Potri.001G189300.1  | 0.5367  | 3.9511  | -2.8801 | Down | 2.52E-08  | 6.51E-08  |
| Unigene21525  | Potri.006G174600.1  | 9.5551  | 70.3737 | -2.8807 | Down | 0         | 0         |
| Unigene27551  | Potri.013G036300.1  | 2.4524  | 18.0649 | -2.8809 | Down | 1.53E-51  | 1.55E-50  |
| Unigene45079  | Potri.011G128900.1  | 1.7123  | 12.614  | -2.881  | Down | 1.42E-44  | 1.23E-43  |
| Unigene52887  | Potri.007G046200.3  | 5.9591  | 43.9105 | -2.8814 | Down | 1.13E-95  | 2.27E-94  |
| Unigene47958  | Potri.009G134100.1  | 0.8642  | 6.3686  | -2.8815 | Down | 1.27E-30  | 7.83E-30  |
| Unigene11029  | Potri.015G023800.1  | 5.1302  | 37.8118 | -2.8817 | Down | 6.78E-199 | 3.51E-197 |
| Unigene38663  | Potri.010G190300.1  | 1.3551  | 9.9887  | -2.8819 | Down | 1.24E-23  | 6.23E-23  |
| Unigene36668  | Potri.009G137400.2  | 11.2461 | 82.8946 | -2.8819 | Down | 5.90E-141 | 1.95E-139 |
| Unigene8058   | Potri.002G134400.1  | 4.3441  | 32.0352 | -2.8825 | Down | 4.56E-69  | 6.32E-68  |
| Unigene40425  | Potri.008G176000.1  | 13.3368 | 98.3603 | -2.8827 | Down | 1.48E-144 | 5.03E-143 |
| Unigene17502  | Potri.012G051300.1  | 1.3698  | 10.1031 | -2.8828 | Down | 1.28E-16  | 5.01E-16  |
| Unigene30013  | Potri.010G170000.1  | 1.2794  | 9.4366  | -2.8828 | Down | 1.28E-16  | 5.01E-16  |
| Unigene29949  | Potri.008G202500.1  | 1.8437  | 13.5988 | -2.8828 | Down | 1.28E-16  | 5.01E-16  |
| Unigene4112   | Potri.008G058300.1  | 2.1551  | 15.8955 | -2.8828 | Down | 1.28E-16  | 5.01E-16  |
| Unigene38110  | Potri.001G399600.1  | 0.7541  | 5.5622  | -2.8828 | Down | 1.28E-16  | 5.01E-16  |
| Unigene3063   | Potri.001G319600.2  | 8.7064  | 64.2246 | -2.883  | Down | 3.10E-214 | 1.74E-212 |
| Unigene10102  | Potri.006G151300.1  | 1.6611  | 12.2562 | -2.8833 | Down | 2.00E-78  | 3.20E-77  |
| Unigene25292  | Potri.001G250500.1  | 10.4312 | 76.9649 | -2.8833 | Down | 2.00E-78  | 3.20E-77  |
| Unigene58431  | Potri.016G056600.5  | 2.1665  | 15.9885 | -2.8836 | Down | 1.80E-71  | 2.58E-70  |
| Unigene65897  | Potri.013G049100.2  | 5.6551  | 41.7408 | -2.8838 | Down | 2.36E-56  | 2.62E-55  |
| Unigene39509  | Potri.001G238400.1  | 2.0407  | 15.0644 | -2.884  | Down | 1.62E-64  | 2.09E-63  |
| Unigene39392  | Potri.015G037400.1  | 3.9902  | 29.4692 | -2.8847 | Down | 4.95E-82  | 8.34E-81  |



|               |                    |         |          |         |      |           |           |
|---------------|--------------------|---------|----------|---------|------|-----------|-----------|
| Unigene48131  | Potri.005G203000.1 | 1.6453  | 12.1512  | -2.8847 | Down | 3.48E-90  | 6.53E-89  |
| Unigene101773 | Potri.011G089500.2 | 0.8211  | 6.0657   | -2.885  | Down | 1.48E-09  | 4.13E-09  |
| Unigene22735  | Potri.001G351200.2 | 15.1314 | 111.7776 | -2.885  | Down | 0         | 0         |
| Unigene100804 | Potri.015G095400.1 | 1.2201  | 9.0135   | -2.8851 | Down | 1.48E-09  | 4.13E-09  |
| Unigene45144  | Potri.015G057600.1 | 1.282   | 9.4708   | -2.8851 | Down | 4.74E-26  | 2.56E-25  |
| Unigene117050 | Potri.014G036000.1 | 0.7612  | 5.6236   | -2.8851 | Down | 1.48E-09  | 4.12E-09  |
| Unigene4608   | Potri.008G111800.4 | 0.6669  | 4.9269   | -2.8851 | Down | 7.83E-18  | 3.21E-17  |
| Unigene44446  | Potri.006G066100.2 | 1.0371  | 7.6619   | -2.8851 | Down | 3.03E-34  | 2.06E-33  |
| Unigene34649  | Potri.006G098700.1 | 0.4463  | 3.2972   | -2.8852 | Down | 1.48E-09  | 4.12E-09  |
| Unigene117853 | Potri.004G167600.1 | 0.6729  | 4.9714   | -2.8852 | Down | 1.48E-09  | 4.12E-09  |
| Unigene105344 | Potri.016G053800.1 | 0.4344  | 3.2095   | -2.8853 | Down | 1.48E-09  | 4.12E-09  |
| Unigene426    | Potri.002G033800.1 | 2.6725  | 19.7521  | -2.8857 | Down | 4.35E-110 | 1.05E-108 |
| Unigene31833  | Potri.010G018800.1 | 6.0214  | 44.5046  | -2.8858 | Down | 0         | 0         |
| Unigene93796  | Potri.017G150100.1 | 60.5685 | 447.7602 | -2.8861 | Down | 0         | 0         |
| Unigene35477  | Potri.014G072000.1 | 4.6226  | 34.1746  | -2.8861 | Down | 1.89E-35  | 1.32E-34  |
| Unigene12558  | Potri.004G030500.1 | 0.9745  | 7.2044   | -2.8861 | Down | 1.89E-35  | 1.32E-34  |
| Unigene86286  | Potri.009G159700.1 | 3.6056  | 26.6562  | -2.8862 | Down | 1.89E-35  | 1.32E-34  |
| Unigene72895  | Potri.016G143200.1 | 7.8525  | 58.0667  | -2.8865 | Down | 5.29E-53  | 5.49E-52  |
| Unigene68776  | Potri.005G044100.1 | 2.5724  | 19.0218  | -2.8865 | Down | 2.93E-27  | 1.64E-26  |
| Unigene32407  | Potri.007G043300.4 | 1.8413  | 13.6185  | -2.8868 | Down | 4.85E-88  | 8.87E-87  |
| Unigene16155  | Potri.008G068600.2 | 1.3165  | 9.739    | -2.8871 | Down | 4.79E-19  | 2.06E-18  |
| Unigene92853  | Potri.002G093700.1 | 2.1898  | 16.1999  | -2.8871 | Down | 1.17E-36  | 8.50E-36  |
| Unigene3579   | Potri.012G007600.1 | 1.0718  | 7.9293   | -2.8872 | Down | 4.79E-19  | 2.06E-18  |
| Unigene80841  | Potri.004G209700.9 | 35.9621 | 266.0869 | -2.8873 | Down | 5.56E-284 | 4.56E-282 |
| Unigene46449  | Potri.001G250500.1 | 12.0493 | 89.152   | -2.8873 | Down | 2.03E-160 | 7.92E-159 |
| Unigene30859  | Potri.004G072200.1 | 1.7331  | 12.8268  | -2.8877 | Down | 1.81E-28  | 1.05E-27  |
| Unigene116423 | Potri.003G018900.1 | 2.6893  | 19.9036  | -2.8877 | Down | 1.81E-28  | 1.05E-27  |
| Unigene22834  | Potri.006G186300.1 | 1.5374  | 11.3786  | -2.8878 | Down | 1.81E-28  | 1.05E-27  |
| Unigene119346 | Potri.014G147300.2 | 1.6401  | 12.1411  | -2.888  | Down | 7.31E-38  | 5.45E-37  |
| Unigene106825 | Potri.001G079300.1 | 0.4162  | 3.0825   | -2.8888 | Down | 8.80E-11  | 2.63E-10  |
| Unigene106977 | Potri.008G032700.1 | 0.6102  | 4.5198   | -2.8889 | Down | 8.80E-11  | 2.63E-10  |
| Unigene36820  | Potri.006G248400.1 | 0.7957  | 5.8938   | -2.8889 | Down | 8.80E-11  | 2.63E-10  |
| Unigene30927  | Potri.007G003000.1 | 0.6891  | 5.1044   | -2.889  | Down | 2.94E-20  | 1.32E-19  |
| Unigene47995  | Potri.005G233600.1 | 8.9449  | 66.2615  | -2.889  | Down | 1.45E-180 | 6.66E-179 |
| Unigene47113  | Potri.017G012100.1 | 8.0816  | 59.876   | -2.8893 | Down | 9.65E-78  | 1.53E-76  |
| Unigene52687  | Potri.009G137400.1 | 8.8586  | 65.6358  | -2.8893 | Down | 2.21E-68  | 3.02E-67  |
| Unigene16986  | Potri.017G089800.4 | 4.8351  | 35.8265  | -2.8894 | Down | 5.09E-59  | 5.95E-58  |
| Unigene12302  | Potri.012G059500.1 | 2.4799  | 18.3751  | -2.8894 | Down | 5.09E-59  | 5.95E-58  |
| Unigene77748  | Potri.014G035800.1 | 10.5655 | 78.3008  | -2.8897 | Down | 6.06E-79  | 9.79E-78  |

|               |                     |         |          |         |      |           |           |
|---------------|---------------------|---------|----------|---------|------|-----------|-----------|
| Unigene86110  | Potri.005G002800.2  | 31.0412 | 230.0536 | -2.8897 | Down | 1.07E-291 | 9.17E-290 |
| Unigene12236  | Potri.005G255500.1  | 13.2451 | 98.1667  | -2.8898 | Down | 0         | 0         |
| Unigene483    | Potri.009G103500.1  | 8.0514  | 59.6779  | -2.8899 | Down | 0         | 0         |
| Unigene64477  | Potri.005G020800.2  | 2.3485  | 17.4136  | -2.8904 | Down | 1.80E-21  | 8.43E-21  |
| Unigene11325  | Potri.009G162400.1  | 3.9847  | 29.5583  | -2.891  | Down | 4.80E-216 | 2.73E-214 |
| Unigene82175  | Potri.006G121700.1  | 64.3741 | 477.5678 | -2.8912 | Down | 0         | 0         |
| Unigene40569  | Potri.004G064500.1  | 1.2872  | 9.5499   | -2.8912 | Down | 2.91E-53  | 3.04E-52  |
| Unigene63467  | Potri.004G012000.2  | 7.6691  | 56.8977  | -2.8912 | Down | 2.91E-53  | 3.04E-52  |
| Unigene119561 | Potri.006G196200.2  | 1.5417  | 11.4394  | -2.8914 | Down | 2.15E-74  | 3.23E-73  |
| Unigene70676  | Potri.018G022700.6  | 26.6692 | 197.9121 | -2.8916 | Down | 2.44E-169 | 1.03E-167 |
| Unigene118588 | Potri.005G136000.1  | 0.733   | 5.4399   | -2.8917 | Down | 5.26E-12  | 1.67E-11  |
| Unigene30802  | Potri.014G109600.1  | 2.3312  | 17.302   | -2.8918 | Down | 1.11E-22  | 5.39E-22  |
| Unigene19352  | Potri.010G253100.3  | 1.2163  | 9.0271   | -2.8918 | Down | 5.26E-12  | 1.67E-11  |
| Unigene16459  | Potri.003G197400.2  | 0.4326  | 3.2107   | -2.8918 | Down | 5.26E-12  | 1.67E-11  |
| Unigene53940  | Potri.003G221200.3  | 9.1613  | 68.0328  | -2.8926 | Down | 1.94E-67  | 2.62E-66  |
| Unigene1157   | Potri.001G371800.1  | 5.8753  | 43.6379  | -2.8928 | Down | 4.83E-234 | 3.03E-232 |
| Unigene269    | Potri.003G201400.1  | 13.3043 | 98.819   | -2.8929 | Down | 0         | 0         |
| Unigene5924   | Potri.003G110700.1  | 1.3173  | 9.7849   | -2.893  | Down | 6.84E-24  | 3.46E-23  |
| Unigene52835  | Potri.016G122800.1  | 9.1467  | 67.9565  | -2.8933 | Down | 3.66E-92  | 7.05E-91  |
| Unigene46767  | Potri.005G218200.1  | 2.3162  | 17.2099  | -2.8934 | Down | 1.04E-35  | 7.34E-35  |
| Unigene41119  | Potri.011G092900.1  | 0.5997  | 4.4578   | -2.894  | Down | 3.16E-13  | 1.07E-12  |
| Unigene117278 | Potri.010G129400.1  | 2.1133  | 15.7098  | -2.8941 | Down | 4.22E-25  | 2.21E-24  |
| Unigene46910  | Potri.009G085400.8  | 1.0342  | 7.6879   | -2.8941 | Down | 6.46E-37  | 4.71E-36  |
| Unigene31477  | Potri.008G063800.1  | 10.8564 | 80.7046  | -2.8941 | Down | 2.96E-166 | 1.22E-164 |
| Unigene119123 | Potri.001G374200.1  | 1.2752  | 9.4796   | -2.8941 | Down | 4.22E-25  | 2.21E-24  |
| Unigene45878  | Potri.015G119300.1  | 1.0458  | 7.7795   | -2.8951 | Down | 2.61E-26  | 1.42E-25  |
| Unigene89719  | Potri.001G250500.1  | 24.3168 | 180.9444 | -2.8955 | Down | 2.27E-279 | 1.81E-277 |
| Unigene85371  | Potri.018G092100.12 | 17.0956 | 127.2532 | -2.896  | Down | 3.59E-157 | 1.37E-155 |
| Unigene16547  | Potri.009G042200.3  | 1.118   | 8.3217   | -2.896  | Down | 1.91E-14  | 6.80E-14  |
| Unigene62552  | Potri.009G042000.1  | 1.5425  | 11.4815  | -2.896  | Down | 1.91E-14  | 6.80E-14  |
| Unigene91518  | Potri.006G051100.1  | 85.5954 | 637.3715 | -2.8965 | Down | 0         | 0         |
| Unigene78261  | Potri.006G133200.5  | 10.7473 | 80.0299  | -2.8966 | Down | 7.26E-82  | 1.22E-80  |
| Unigene29334  | Potri.007G104300.1  | 3.2651  | 24.3258  | -2.8973 | Down | 2.63E-71  | 3.78E-70  |
| Unigene104680 | Potri.015G072900.1  | 1.8806  | 14.0142  | -2.8976 | Down | 1.16E-15  | 4.34E-15  |
| Unigene19174  | Potri.012G071900.1  | 1.1596  | 8.6409   | -2.8976 | Down | 1.16E-15  | 4.34E-15  |
| Unigene4415   | Potri.010G180700.2  | 1.2825  | 9.5569   | -2.8976 | Down | 1.16E-15  | 4.34E-15  |
| Unigene45610  | Potri.002G242100.1  | 1.089   | 8.1153   | -2.8976 | Down | 1.16E-15  | 4.34E-15  |
| Unigene115480 | Potri.001G061200.2  | 1.5434  | 11.5013  | -2.8976 | Down | 1.16E-15  | 4.34E-15  |
| Unigene49494  | Potri.003G174900.1  | 3.855   | 28.7358  | -2.898  | Down | 2.37E-45  | 2.09E-44  |

|               |                    |         |          |         |      |           |           |
|---------------|--------------------|---------|----------|---------|------|-----------|-----------|
| Unigene110306 | Potri.011G119500.8 | 6.2166  | 46.3397  | -2.8981 | Down | 2.37E-45  | 2.09E-44  |
| Unigene85573  | Potri.009G151400.2 | 26.1097 | 194.6904 | -2.8985 | Down | 2.46E-241 | 1.62E-239 |
| Unigene16789  | Potri.013G161700.5 | 1.8794  | 14.0181  | -2.8989 | Down | 7.05E-17  | 2.78E-16  |
| Unigene49130  | Potri.008G117600.2 | 2.641   | 19.6986  | -2.8989 | Down | 1.61E-78  | 2.59E-77  |
| Unigene20293  | Potri.004G078200.3 | 1.271   | 9.4801   | -2.8989 | Down | 2.38E-32  | 1.54E-31  |
| Unigene6632   | Potri.004G001900.2 | 2.571   | 19.1764  | -2.8989 | Down | 1.61E-78  | 2.59E-77  |
| Unigene80143  | Potri.001G359700.2 | 3.9422  | 29.4038  | -2.8989 | Down | 2.38E-32  | 1.54E-31  |
| Unigene30265  | Potri.001G247400.3 | 3.0885  | 23.0361  | -2.8989 | Down | 2.38E-32  | 1.54E-31  |
| Unigene104081 | Potri.004G092200.2 | 0.4834  | 3.6059   | -2.8991 | Down | 7.05E-17  | 2.78E-16  |
| Unigene19935  | Potri.008G110300.2 | 6.3086  | 47.0668  | -2.8993 | Down | 2.76E-96  | 5.63E-95  |
| Unigene37596  | Potri.006G151100.2 | 3.1669  | 23.6309  | -2.8995 | Down | 1.48E-33  | 9.88E-33  |
| Unigene118937 | Potri.008G035800.3 | 0.9909  | 7.3965   | -2.9    | Down | 4.30E-18  | 1.78E-17  |
| Unigene9930   | Potri.003G129000.3 | 1.6578  | 12.3745  | -2.9    | Down | 4.30E-18  | 1.78E-17  |
| Unigene26762  | Potri.007G131500.1 | 9.2017  | 68.6866  | -2.9001 | Down | 5.87E-68  | 7.99E-67  |
| Unigene92622  | Potri.018G044700.1 | 48.9224 | 365.268  | -2.9004 | Down | 0         | 0         |
| Unigene45025  | Potri.005G167900.1 | 19.6223 | 146.5034 | -2.9004 | Down | 0         | 0         |
| Unigene2178   | Potri.015G022100.7 | 4.0217  | 30.0327  | -2.9007 | Down | 1.89E-122 | 5.22E-121 |
| Unigene37978  | Potri.011G164700.1 | 1.5081  | 11.2649  | -2.901  | Down | 2.63E-19  | 1.14E-18  |
| Unigene84406  | Potri.006G117900.1 | 69.0981 | 516.192  | -2.9012 | Down | 0         | 0         |
| Unigene34087  | Potri.009G168800.1 | 7.4958  | 56.0275  | -2.902  | Down | 2.60E-249 | 1.79E-247 |
| Unigene724    | Potri.009G132200.2 | 1.5279  | 11.4262  | -2.9027 | Down | 3.34E-62  | 4.12E-61  |
| Unigene8328   | Potri.003G179100.1 | 1.5524  | 11.6142  | -2.9033 | Down | 2.09E-44  | 1.81E-43  |
| Unigene47536  | Potri.014G114100.1 | 2.0722  | 15.5036  | -2.9034 | Down | 6.10E-23  | 2.99E-22  |
| Unigene8626   | Potri.011G058100.3 | 11.3475 | 84.8983  | -2.9034 | Down | 6.50E-130 | 1.93E-128 |
| Unigene5886   | Potri.010G231200.1 | 2.4959  | 18.6734  | -2.9034 | Down | 6.10E-23  | 2.99E-22  |
| Unigene20660  | Potri.001G102200.1 | 6.1128  | 45.7343  | -2.9034 | Down | 6.50E-130 | 1.93E-128 |
| Unigene65073  | Potri.011G079000.2 | 7.2841  | 54.5274  | -2.9042 | Down | 1.27E-70  | 1.81E-69  |
| Unigene94112  | Potri.019G131300.1 | 50.4641 | 377.8376 | -2.9044 | Down | 0         | 0         |
| Unigene44758  | Potri.008G120000.2 | 6.2241  | 46.5993  | -2.9044 | Down | 1.14E-165 | 4.68E-164 |
| Unigene35622  | Potri.008G173100.1 | 1.2089  | 9.0536   | -2.9048 | Down | 1.99E-50  | 1.95E-49  |
| Unigene61960  | Potri.010G203900.1 | 2.2508  | 16.8593  | -2.905  | Down | 1.43E-26  | 7.87E-26  |
| Unigene65898  | Potri.008G142400.4 | 11.8022 | 88.4075  | -2.9051 | Down | 9.01E-128 | 2.61E-126 |
| Unigene43033  | Potri.019G067800.1 | 8.7504  | 65.5787  | -2.9058 | Down | 0         | 0         |
| Unigene86465  | Potri.018G044700.1 | 28.4069 | 212.9018 | -2.9059 | Down | 2.78E-275 | 2.18E-273 |
| Unigene19616  | Potri.016G021700.1 | 3.5523  | 26.6237  | -2.9059 | Down | 1.90E-56  | 2.12E-55  |
| Unigene63832  | Potri.T175200.1    | 4.3246  | 32.4199  | -2.9062 | Down | 3.40E-30  | 2.07E-29  |
| Unigene35362  | Potri.016G123700.1 | 0.9693  | 7.2684   | -2.9066 | Down | 2.11E-31  | 1.33E-30  |
| Unigene91785  | Potri.017G129100.8 | 38.2342 | 286.7887 | -2.9071 | Down | 0         | 0         |
| Unigene64360  | Potri.010G012800.3 | 2.6784  | 20.0926  | -2.9072 | Down | 8.13E-34  | 5.46E-33  |

|               |                    |         |          |         |      |           |           |
|---------------|--------------------|---------|----------|---------|------|-----------|-----------|
| Unigene69897  | Potri.008G125500.2 | 2.294   | 17.2092  | -2.9072 | Down | 8.13E-34  | 5.46E-33  |
| Unigene119416 | Potri.015G146500.1 | 1.4195  | 10.6528  | -2.9078 | Down | 3.14E-36  | 2.25E-35  |
| Unigene42984  | Potri.006G100400.1 | 2.2081  | 16.5754  | -2.9082 | Down | 1.12E-112 | 2.77E-111 |
| Unigene32262  | Potri.013G028600.1 | 7.6215  | 57.2315  | -2.9087 | Down | 0         | 0         |
| Unigene11540  | Potri.007G074500.2 | 1.2012  | 9.0246   | -2.9094 | Down | 4.47E-47  | 4.11E-46  |
| Unigene57626  | Potri.001G177300.3 | 4.7974  | 36.0504  | -2.9097 | Down | 2.53E-97  | 5.24E-96  |
| Unigene87522  | Potri.016G065900.7 | 34.4756 | 259.2389 | -2.9106 | Down | 0         | 0         |
| Unigene20004  | Potri.006G276900.2 | 5.7774  | 43.4612  | -2.9112 | Down | 6.13E-70  | 8.61E-69  |
| Unigene60971  | Potri.015G066000.1 | 7.6643  | 57.663   | -2.9114 | Down | 1.51E-73  | 2.25E-72  |
| Unigene43301  | Potri.018G046500.1 | 7.6793  | 57.7917  | -2.9118 | Down | 1.05E-244 | 7.04E-243 |
| Unigene70910  | Potri.010G066900.1 | 37.2995 | 280.6967 | -2.9118 | Down | 2.63E-242 | 1.74E-240 |
| Unigene32678  | Potri.006G217300.1 | 1.7     | 12.7935  | -2.9118 | Down | 3.66E-83  | 6.26E-82  |
| Unigene27862  | Potri.006G137000.1 | 6.6051  | 49.7083  | -2.9118 | Down | 3.66E-83  | 6.26E-82  |
| Unigene114994 | Potri.016G139900.1 | 0.5329  | 4.0185   | -2.9147 | Down | 4.17E-06  | 9.09E-06  |
| Unigene117294 | Potri.010G070000.2 | 0.4215  | 3.1785   | -2.9147 | Down | 4.17E-06  | 9.09E-06  |
| Unigene106391 | Potri.T082300.1    | 0.6525  | 4.9206   | -2.9148 | Down | 1.38E-08  | 3.62E-08  |
| Unigene117603 | Potri.T077700.1    | 0.4011  | 3.0247   | -2.9148 | Down | 4.17E-06  | 9.09E-06  |
| Unigene100699 | Potri.019G080000.1 | 0.7038  | 5.3075   | -2.9148 | Down | 4.17E-06  | 9.09E-06  |
| Unigene16174  | Potri.019G047000.2 | 0.5774  | 4.3544   | -2.9148 | Down | 2.38E-07  | 5.73E-07  |
| Unigene56969  | Potri.017G107300.1 | 0.6646  | 5.012    | -2.9148 | Down | 4.82E-11  | 1.46E-10  |
| Unigene37881  | Potri.014G189500.1 | 0.4304  | 3.2457   | -2.9148 | Down | 7.51E-05  | 1.46E-04  |
| Unigene113085 | Potri.014G110900.1 | 0.5968  | 4.5007   | -2.9148 | Down | 4.17E-06  | 9.09E-06  |
| Unigene30174  | Potri.014G010900.1 | 1.6     | 12.0663  | -2.9148 | Down | 8.86E-21  | 4.04E-20  |
| Unigene104684 | Potri.014G003200.1 | 0.4011  | 3.0247   | -2.9148 | Down | 7.51E-05  | 1.46E-04  |
| Unigene39852  | Potri.012G116100.1 | 0.5157  | 3.8889   | -2.9148 | Down | 1.38E-08  | 3.62E-08  |
| Unigene6911   | Potri.010G126300.4 | 1.1626  | 8.7677   | -2.9148 | Down | 6.35E-16  | 2.41E-15  |
| Unigene118160 | Potri.008G160500.1 | 0.4527  | 3.4138   | -2.9148 | Down | 2.38E-07  | 5.73E-07  |
| Unigene116256 | Potri.008G082700.1 | 0.4767  | 3.5948   | -2.9148 | Down | 4.17E-06  | 9.09E-06  |
| Unigene104245 | Potri.007G101500.1 | 0.7503  | 5.6583   | -2.9148 | Down | 8.12E-10  | 2.29E-09  |
| Unigene114745 | Potri.007G058700.2 | 1.0851  | 8.1832   | -2.9148 | Down | 4.82E-11  | 1.46E-10  |
| Unigene43398  | Potri.006G281000.1 | 2.0054  | 15.1235  | -2.9148 | Down | 8.12E-80  | 1.33E-78  |
| Unigene118295 | Potri.006G271000.1 | 1.0532  | 7.9425   | -2.9148 | Down | 6.35E-16  | 2.41E-15  |
| Unigene61455  | Potri.006G241300.3 | 0.639   | 4.8188   | -2.9148 | Down | 4.82E-11  | 1.46E-10  |
| Unigene108409 | Potri.005G060800.1 | 0.7208  | 5.4357   | -2.9148 | Down | 4.17E-06  | 9.09E-06  |
| Unigene5834   | Potri.003G126500.2 | 0.6322  | 4.7677   | -2.9148 | Down | 8.12E-10  | 2.29E-09  |
| Unigene31000  | Potri.003G106400.3 | 3.4537  | 26.046   | -2.9148 | Down | 1.01E-43  | 8.62E-43  |
| Unigene69895  | Potri.002G120900.2 | 0.7675  | 5.788    | -2.9148 | Down | 1.73E-13  | 5.91E-13  |
| Unigene110997 | Potri.002G016200.1 | 0.4908  | 3.7013   | -2.9148 | Down | 7.51E-05  | 1.46E-04  |
| Unigene117999 | Potri.001G273700.1 | 0.6544  | 4.935    | -2.9148 | Down | 8.12E-10  | 2.29E-09  |

|               |                    |        |         |         |      |          |          |
|---------------|--------------------|--------|---------|---------|------|----------|----------|
| Unigene103258 | Potri.001G029300.1 | 0.5419 | 4.0866  | -2.9148 | Down | 1.38E-08 | 3.62E-08 |
| Unigene17901  | Potri.T085200.2    | 1.097  | 8.2734  | -2.9149 | Down | 2.88E-12 | 9.27E-12 |
| Unigene112333 | Potri.T059200.1    | 1.0789 | 8.1367  | -2.9149 | Down | 8.12E-10 | 2.29E-09 |
| Unigene48062  | Potri.T013400.1    | 1.0081 | 7.6026  | -2.9149 | Down | 1.38E-08 | 3.62E-08 |
| Unigene37333  | Potri.019G002800.1 | 0.5485 | 4.1367  | -2.9149 | Down | 6.35E-16 | 2.41E-15 |
| Unigene61453  | Potri.018G064800.2 | 1.7416 | 13.1345 | -2.9149 | Down | 6.35E-16 | 2.41E-15 |
| Unigene35197  | Potri.017G078100.5 | 8.7068 | 65.6629 | -2.9149 | Down | 4.82E-99 | 1.02E-97 |
| Unigene19184  | Potri.017G058500.2 | 4.2191 | 31.8188 | -2.9149 | Down | 1.26E-84 | 2.21E-83 |
| Unigene97822  | Potri.016G113600.7 | 1.1249 | 8.4835  | -2.9149 | Down | 2.06E-24 | 1.06E-23 |
| Unigene46993  | Potri.016G065900.9 | 1.182  | 8.9143  | -2.9149 | Down | 2.88E-12 | 9.27E-12 |
| Unigene105249 | Potri.016G015600.1 | 0.6279 | 4.7356  | -2.9149 | Down | 2.38E-07 | 5.73E-07 |
| Unigene96277  | Potri.015G147500.2 | 0.4025 | 3.0356  | -2.9149 | Down | 7.51E-05 | 1.46E-04 |
| Unigene50904  | Potri.015G102200.1 | 0.506  | 3.816   | -2.9149 | Down | 8.12E-10 | 2.29E-09 |
| Unigene74425  | Potri.015G095500.2 | 6.2455 | 47.1008 | -2.9149 | Down | 6.30E-45 | 5.52E-44 |
| Unigene16784  | Potri.015G027500.1 | 0.6165 | 4.6495  | -2.9149 | Down | 4.17E-06 | 9.09E-06 |
| Unigene66000  | Potri.014G093100.1 | 4.4254 | 33.3742 | -2.9149 | Down | 2.77E-35 | 1.94E-34 |
| Unigene8228   | Potri.014G059800.1 | 2.6259 | 19.8033 | -2.9149 | Down | 1.47E-54 | 1.57E-53 |
| Unigene119340 | Potri.013G159200.1 | 1.6589 | 12.511  | -2.9149 | Down | 6.69E-39 | 5.11E-38 |
| Unigene48672  | Potri.012G139800.1 | 0.9048 | 6.8239  | -2.9149 | Down | 2.88E-12 | 9.27E-12 |
| Unigene54351  | Potri.012G122700.1 | 2.5316 | 19.0925 | -2.9149 | Down | 1.44E-19 | 6.33E-19 |
| Unigene114513 | Potri.011G140700.1 | 0.4129 | 3.114   | -2.9149 | Down | 7.51E-05 | 1.46E-04 |
| Unigene31619  | Potri.011G073900.1 | 2.4866 | 18.7531 | -2.9149 | Down | 8.86E-21 | 4.04E-20 |
| Unigene60230  | Potri.011G034200.1 | 2.0494 | 15.4558 | -2.9149 | Down | 1.44E-19 | 6.33E-19 |
| Unigene118155 | Potri.011G011200.1 | 0.726  | 5.4754  | -2.9149 | Down | 4.82E-11 | 1.46E-10 |
| Unigene27310  | Potri.010G184200.1 | 2.0549 | 15.4971 | -2.9149 | Down | 2.60E-41 | 2.10E-40 |
| Unigene14812  | Potri.010G153600.1 | 0.6829 | 5.1502  | -2.9149 | Down | 7.87E-27 | 4.35E-26 |
| Unigene104238 | Potri.010G143000.1 | 0.8706 | 6.5659  | -2.9149 | Down | 2.06E-24 | 1.06E-23 |
| Unigene104131 | Potri.010G075600.2 | 0.4951 | 3.734   | -2.9149 | Down | 7.51E-05 | 1.46E-04 |
| Unigene98114  | Potri.010G057400.4 | 0.5303 | 3.9995  | -2.9149 | Down | 7.51E-05 | 1.46E-04 |
| Unigene99075  | Potri.009G155200.1 | 0.4643 | 3.5016  | -2.9149 | Down | 7.51E-05 | 1.46E-04 |
| Unigene78108  | Potri.009G111400.2 | 9.0471 | 68.2293 | -2.9149 | Down | 3.37E-70 | 4.75E-69 |
| Unigene114680 | Potri.008G060500.1 | 0.9529 | 7.1864  | -2.9149 | Down | 8.12E-10 | 2.29E-09 |
| Unigene49334  | Potri.008G004200.2 | 0.9033 | 6.8124  | -2.9149 | Down | 1.87E-30 | 1.15E-29 |
| Unigene110679 | Potri.006G159200.1 | 0.6631 | 5.0008  | -2.9149 | Down | 4.17E-06 | 9.09E-06 |
| Unigene64415  | Potri.006G151100.2 | 3.5951 | 27.1129 | -2.9149 | Down | 1.87E-30 | 1.15E-29 |
| Unigene104848 | Potri.005G181700.1 | 0.8972 | 6.7666  | -2.9149 | Down | 8.12E-10 | 2.29E-09 |
| Unigene98774  | Potri.005G026400.1 | 0.4401 | 3.3191  | -2.9149 | Down | 4.17E-06 | 9.09E-06 |
| Unigene106451 | Potri.004G232500.1 | 1.3502 | 10.1827 | -2.9149 | Down | 4.17E-40 | 3.28E-39 |
| Unigene25579  | Potri.004G157000.2 | 0.7219 | 5.4444  | -2.9149 | Down | 2.88E-12 | 9.27E-12 |

|               |                     |         |          |         |      |           |           |
|---------------|---------------------|---------|----------|---------|------|-----------|-----------|
| Unigene101957 | Potri.004G098100.1  | 0.5944  | 4.4828   | -2.9149 | Down | 4.17E-06  | 9.09E-06  |
| Unigene62796  | Potri.004G048300.1  | 4.9559  | 37.3751  | -2.9149 | Down | 2.46E-47  | 2.27E-46  |
| Unigene71250  | Potri.004G043800.1  | 19.2037 | 144.8259 | -2.9149 | Down | 1.14E-126 | 3.29E-125 |
| Unigene64054  | Potri.004G002000.1  | 1.2122  | 9.1421   | -2.9149 | Down | 3.87E-17  | 1.54E-16  |
| Unigene117836 | Potri.003G221200.3  | 0.4819  | 3.6343   | -2.9149 | Down | 2.38E-07  | 5.73E-07  |
| Unigene106690 | Potri.002G213400.1  | 1.2433  | 9.3765   | -2.9149 | Down | 3.87E-17  | 1.54E-16  |
| Unigene116264 | Potri.002G059000.2  | 0.9533  | 7.1897   | -2.9149 | Down | 4.82E-11  | 1.46E-10  |
| Unigene20965  | Potri.001G300700.1  | 1.2084  | 9.1133   | -2.9149 | Down | 1.44E-19  | 6.33E-19  |
| Unigene47699  | Potri.001G254100.1  | 1.0704  | 8.0725   | -2.9149 | Down | 3.87E-17  | 1.54E-16  |
| Unigene5085   | Potri.001G211000.6  | 0.4844  | 3.6532   | -2.9149 | Down | 7.51E-05  | 1.46E-04  |
| Unigene8747   | Potri.001G168100.1  | 0.6631  | 5.0008   | -2.9149 | Down | 4.17E-06  | 9.09E-06  |
| Unigene83798  | Potri.001G098700.3  | 1.093   | 8.2431   | -2.9149 | Down | 4.82E-11  | 1.46E-10  |
| Unigene116326 | Potri.014G106800.11 | 0.4736  | 3.572    | -2.915  | Down | 4.17E-06  | 9.09E-06  |
| Unigene113224 | Potri.014G071600.1  | 0.444   | 3.3488   | -2.915  | Down | 7.51E-05  | 1.46E-04  |
| Unigene111922 | Potri.006G160300.3  | 0.4721  | 3.5607   | -2.915  | Down | 7.51E-05  | 1.46E-04  |
| Unigene9035   | Potri.004G164000.1  | 6.483   | 48.9877  | -2.9177 | Down | 1.08E-89  | 2.02E-88  |
| Unigene93856  | Potri.013G135700.1  | 19.7801 | 149.4768 | -2.9178 | Down | 0         | 0         |
| Unigene47994  | Potri.001G235500.3  | 11.9078 | 89.9922  | -2.9179 | Down | 1.11E-83  | 1.91E-82  |
| Unigene27984  | Potri.010G201100.3  | 3.3909  | 25.6594  | -2.9197 | Down | 2.06E-52  | 2.12E-51  |
| Unigene34734  | Potri.006G243700.4  | 25.7448 | 194.8109 | -2.9197 | Down | 0.00E+00  | 1.84E-306 |
| Unigene44685  | Potri.004G033600.3  | 12.8179 | 96.9943  | -2.9197 | Down | 2.21E-256 | 1.58E-254 |
| Unigene32137  | Potri.013G030900.1  | 4.6907  | 35.4969  | -2.9198 | Down | 3.97E-202 | 2.09E-200 |
| Unigene430    | Potri.010G137000.1  | 7.4237  | 56.1813  | -2.9199 | Down | 0         | 0         |
| Unigene8533   | Potri.016G038600.1  | 2.1679  | 16.4095  | -2.9202 | Down | 8.44E-49  | 8.03E-48  |
| Unigene13567  | Potri.007G135800.1  | 10.1829 | 77.0792  | -2.9202 | Down | 0         | 0         |
| Unigene45954  | Potri.019G053200.4  | 4.4133  | 33.4365  | -2.9215 | Down | 3.67E-39  | 2.82E-38  |
| Unigene22337  | Potri.004G121800.1  | 8.1187  | 61.5273  | -2.9219 | Down | 1.90E-213 | 1.06E-211 |
| Unigene23801  | Potri.004G099400.2  | 0.9044  | 6.8543   | -2.922  | Down | 9.48E-37  | 6.88E-36  |
| Unigene52916  | Potri.010G074300.1  | 3.4372  | 26.0587  | -2.9225 | Down | 2.45E-34  | 1.67E-33  |
| Unigene15146  | Potri.002G113400.1  | 2.2836  | 17.3247  | -2.9234 | Down | 1.02E-30  | 6.35E-30  |
| Unigene17320  | Potri.010G113300.1  | 15.6013 | 118.366  | -2.9235 | Down | 0         | 0         |
| Unigene29730  | Potri.T128700.2     | 3.6046  | 27.353   | -2.9238 | Down | 1.65E-29  | 9.90E-29  |
| Unigene51246  | Potri.019G085500.2  | 3.2054  | 24.3309  | -2.9242 | Down | 2.67E-28  | 1.54E-27  |
| Unigene40381  | Potri.006G140500.1  | 1.9491  | 14.795   | -2.9242 | Down | 2.67E-28  | 1.54E-27  |
| Unigene47665  | Potri.003G142400.1  | 2.1538  | 16.3483  | -2.9242 | Down | 2.67E-28  | 1.54E-27  |
| Unigene11980  | Potri.010G002500.7  | 9.1871  | 69.7467  | -2.9244 | Down | 1.05E-183 | 4.91E-182 |
| Unigene49557  | Potri.003G008400.2  | 1.1797  | 8.9569   | -2.9246 | Down | 4.32E-27  | 2.41E-26  |
| Unigene23665  | Potri.001G178200.1  | 1.5689  | 11.9138  | -2.9248 | Down | 5.44E-77  | 8.55E-76  |
| Unigene10814  | Potri.013G065500.2  | 1.9752  | 14.9997  | -2.9249 | Down | 9.12E-127 | 2.62E-125 |

|               |                     |         |          |         |      |           |           |
|---------------|---------------------|---------|----------|---------|------|-----------|-----------|
| Unigene27265  | Potri.011G058100.3  | 2.6643  | 20.2437  | -2.9256 | Down | 1.13E-24  | 5.86E-24  |
| Unigene418    | Potri.005G178200.1  | 3.407   | 25.8862  | -2.9256 | Down | 1.67E-164 | 6.80E-163 |
| Unigene17299  | Potri.007G100600.1  | 12.9875 | 98.714   | -2.9261 | Down | 5.00E-201 | 2.62E-199 |
| Unigene44476  | Potri.007G075000.1  | 9.3961  | 71.4131  | -2.9261 | Down | 3.15E-202 | 1.66E-200 |
| Unigene822    | Potri.005G071300.1  | 5.728   | 43.538   | -2.9262 | Down | 0         | 0         |
| Unigene72479  | Potri.004G209700.9  | 12.6134 | 95.9009  | -2.9266 | Down | 7.25E-87  | 1.30E-85  |
| Unigene32601  | Potri.004G217800.4  | 5.0863  | 38.6735  | -2.9267 | Down | 1.50E-107 | 3.50E-106 |
| Unigene19141  | Potri.003G070400.2  | 1.7912  | 13.6221  | -2.927  | Down | 2.98E-22  | 1.43E-21  |
| Unigene96375  | Potri.001G028200.1  | 0.7667  | 5.831    | -2.927  | Down | 2.98E-22  | 1.43E-21  |
| Unigene71060  | Potri.001G100800.2  | 36.5609 | 278.1135 | -2.9273 | Down | 1.33E-242 | 8.78E-241 |
| Unigene119226 | Potri.019G115400.1  | 0.9428  | 7.1737   | -2.9277 | Down | 4.86E-21  | 2.24E-20  |
| Unigene788    | Potri.005G005100.1  | 1.563   | 11.9025  | -2.9289 | Down | 2.43E-55  | 2.65E-54  |
| Unigene30106  | Potri.015G072200.1  | 2.1141  | 16.1066  | -2.9295 | Down | 1.29E-18  | 5.47E-18  |
| Unigene90040  | Potri.010G182600.1  | 14.0753 | 107.2328 | -2.9295 | Down | 1.74E-172 | 7.47E-171 |
| Unigene3499   | Potri.002G102700.1  | 3.7568  | 28.6211  | -2.9295 | Down | 8.36E-36  | 5.92E-35  |
| Unigene81818  | Potri.019G131300.1  | 39.7668 | 303.0308 | -2.9298 | Down | 0         | 0         |
| Unigene54032  | Potri.017G138600.1  | 5.8739  | 44.7733  | -2.9302 | Down | 1.59E-50  | 1.57E-49  |
| Unigene30202  | Potri.001G351200.2  | 16.0296 | 122.2162 | -2.9306 | Down | 9.52E-129 | 2.79E-127 |
| Unigene100230 | Potri.004G195400.2  | 0.6076  | 4.6329   | -2.9307 | Down | 2.12E-17  | 8.54E-17  |
| Unigene33569  | Potri.016G021600.1  | 5.2208  | 39.8102  | -2.9308 | Down | 1.13E-111 | 2.77E-110 |
| Unigene28601  | Potri.005G181500.1  | 6.2669  | 47.7911  | -2.9309 | Down | 1.81E-204 | 9.66E-203 |
| Unigene15193  | Potri.018G151600.1  | 2.8904  | 22.045   | -2.9311 | Down | 1.03E-78  | 1.66E-77  |
| Unigene16730  | Potri.007G008600.14 | 6.6606  | 50.8056  | -2.9313 | Down | 8.05E-63  | 1.01E-61  |
| Unigene85731  | Potri.014G072300.5  | 25.0367 | 191.0173 | -2.9316 | Down | 3.03E-241 | 1.99E-239 |
| Unigene23342  | Potri.007G104300.1  | 5.5468  | 42.3195  | -2.9316 | Down | 1.53E-121 | 4.18E-120 |
| Unigene107030 | Potri.019G034500.3  | 0.9079  | 6.9285   | -2.9319 | Down | 3.48E-16  | 1.34E-15  |
| Unigene64142  | Potri.014G013800.2  | 4.2628  | 32.5309  | -2.9319 | Down | 5.62E-31  | 3.51E-30  |
| Unigene119286 | Potri.011G151100.1  | 0.6771  | 5.1675   | -2.932  | Down | 3.48E-16  | 1.34E-15  |
| Unigene40681  | Potri.007G020600.1  | 0.6886  | 5.255    | -2.932  | Down | 3.48E-16  | 1.34E-15  |
| Unigene36695  | Potri.001G161600.1  | 1.1672  | 8.9118   | -2.9327 | Down | 9.07E-30  | 5.47E-29  |
| Unigene45353  | Potri.013G141500.1  | 53.4579 | 408.409  | -2.9335 | Down | 0         | 0         |
| Unigene112249 | Potri.008G102300.4  | 1.7025  | 13.006   | -2.9335 | Down | 5.73E-15  | 2.09E-14  |
| Unigene1554   | Potri.003G088300.6  | 7.6402  | 58.391   | -2.9341 | Down | 0         | 0         |
| Unigene47451  | Potri.019G084800.1  | 3.036   | 23.2077  | -2.9344 | Down | 2.37E-27  | 1.33E-26  |
| Unigene25372  | Potri.003G034900.8  | 4.101   | 31.3487  | -2.9344 | Down | 3.41E-53  | 3.56E-52  |
| Unigene32757  | Potri.006G110000.1  | 1.9164  | 14.654   | -2.9348 | Down | 5.45E-52  | 5.55E-51  |
| Unigene49368  | Potri.006G092000.1  | 8.2354  | 62.9706  | -2.9348 | Down | 0         | 0         |
| Unigene99952  | Potri.010G074700.1  | 1.3369  | 10.2263  | -2.9353 | Down | 9.48E-14  | 3.27E-13  |
| Unigene40682  | Potri.006G108900.1  | 0.7936  | 6.0705   | -2.9353 | Down | 9.48E-14  | 3.27E-13  |

|               |                    |         |          |         |      |           |           |
|---------------|--------------------|---------|----------|---------|------|-----------|-----------|
| Unigene118437 | Potri.001G211900.1 | 0.8458  | 6.4697   | -2.9353 | Down | 9.48E-14  | 3.27E-13  |
| Unigene5946   | Potri.015G144100.1 | 1.211   | 9.2635   | -2.9354 | Down | 3.83E-26  | 2.08E-25  |
| Unigene78661  | Potri.010G128600.1 | 9.2465  | 70.7462  | -2.9357 | Down | 3.64E-74  | 5.46E-73  |
| Unigene39845  | Potri.010G147400.1 | 5.6798  | 43.4656  | -2.936  | Down | 7.30E-121 | 1.99E-119 |
| Unigene46236  | Potri.019G000200.1 | 7.5068  | 57.4556  | -2.9362 | Down | 1.73E-237 | 1.11E-235 |
| Unigene105067 | Potri.005G104100.1 | 1.2834  | 9.8231   | -2.9362 | Down | 1.13E-60  | 1.35E-59  |
| Unigene43161  | Potri.004G075700.4 | 2.5086  | 19.2035  | -2.9364 | Down | 4.06E-95  | 8.14E-94  |
| Unigene81948  | Potri.014G001100.4 | 9.5417  | 73.0499  | -2.9366 | Down | 7.69E-83  | 1.31E-81  |
| Unigene3511   | Potri.019G129100.1 | 0.7647  | 5.8584   | -2.9375 | Down | 1.01E-23  | 5.06E-23  |
| Unigene107216 | Potri.016G107200.1 | 0.3987  | 3.0545   | -2.9376 | Down | 1.58E-12  | 5.13E-12  |
| Unigene15971  | Potri.006G255300.2 | 1.1904  | 9.12     | -2.9376 | Down | 1.58E-12  | 5.13E-12  |
| Unigene61823  | Potri.006G098300.1 | 2.524   | 19.3372  | -2.9376 | Down | 1.01E-23  | 5.06E-23  |
| Unigene47313  | Potri.003G161600.5 | 0.9646  | 7.3904   | -2.9376 | Down | 1.58E-12  | 5.13E-12  |
| Unigene19791  | Potri.002G161600.1 | 4.0284  | 30.8622  | -2.9376 | Down | 7.37E-35  | 5.08E-34  |
| Unigene102593 | Potri.002G022000.1 | 0.6531  | 5.0036   | -2.9376 | Down | 1.58E-12  | 5.13E-12  |
| Unigene105975 | Potri.001G402400.1 | 0.9702  | 7.4331   | -2.9376 | Down | 1.58E-12  | 5.13E-12  |
| Unigene33704  | Potri.005G084800.1 | 13.7019 | 105.0647 | -2.9388 | Down | 3.13E-201 | 1.64E-199 |
| Unigene86805  | Potri.006G111600.1 | 19.9906 | 153.3867 | -2.9398 | Down | 6.85E-204 | 3.63E-202 |
| Unigene21002  | Potri.010G182600.1 | 8.014   | 61.5036  | -2.9401 | Down | 1.20E-101 | 2.63E-100 |
| Unigene105996 | Potri.019G082800.1 | 0.8335  | 6.3982   | -2.9404 | Down | 2.63E-11  | 8.08E-11  |
| Unigene104544 | Potri.018G080700.1 | 0.8624  | 6.6201   | -2.9404 | Down | 2.63E-11  | 8.08E-11  |
| Unigene8197   | Potri.014G103600.1 | 2.1781  | 16.7194  | -2.9404 | Down | 2.66E-21  | 1.24E-20  |
| Unigene20076  | Potri.012G061400.1 | 0.9688  | 7.4369   | -2.9404 | Down | 2.63E-11  | 8.08E-11  |
| Unigene1176   | Potri.010G103000.1 | 1.1279  | 8.6581   | -2.9404 | Down | 1.43E-90  | 2.69E-89  |
| Unigene12368  | Potri.001G035100.1 | 1.2356  | 9.4847   | -2.9404 | Down | 2.66E-21  | 1.24E-20  |
| Unigene27210  | Potri.017G054800.1 | 6.2355  | 47.8802  | -2.9409 | Down | 1.29E-69  | 1.80E-68  |
| Unigene118270 | Potri.016G056600.5 | 2.0281  | 15.5801  | -2.9415 | Down | 4.97E-30  | 3.02E-29  |
| Unigene46954  | Potri.006G061200.1 | 3.4236  | 26.3048  | -2.9417 | Down | 1.22E-48  | 1.16E-47  |
| Unigene25139  | Potri.012G109200.1 | 1.368   | 10.513   | -2.942  | Down | 4.33E-20  | 1.93E-19  |
| Unigene52456  | Potri.001G232800.1 | 1.7162  | 13.1896  | -2.9421 | Down | 4.33E-20  | 1.93E-19  |
| Unigene70929  | Potri.008G200200.2 | 5.3815  | 41.3848  | -2.943  | Down | 1.56E-37  | 1.16E-36  |
| Unigene324    | Potri.003G018800.3 | 10.5678 | 81.2777  | -2.9432 | Down | 0         | 0         |
| Unigene33260  | Potri.007G100600.1 | 9.528   | 73.2883  | -2.9433 | Down | 2.29E-161 | 9.04E-160 |
| Unigene93932  | Potri.001G379000.1 | 17.232  | 132.5994 | -2.9439 | Down | 0         | 0         |
| Unigene26480  | Potri.018G087700.3 | 1.1656  | 8.9699   | -2.944  | Down | 4.43E-10  | 1.27E-09  |
| Unigene65970  | Potri.012G122400.2 | 2.2412  | 17.2469  | -2.944  | Down | 7.08E-19  | 3.02E-18  |
| Unigene105164 | Potri.011G053200.1 | 1.9198  | 14.774   | -2.944  | Down | 1.30E-27  | 7.35E-27  |
| Unigene10360  | Potri.010G080600.1 | 6.7692  | 52.0919  | -2.944  | Down | 2.12E-62  | 2.63E-61  |
| Unigene21678  | Potri.008G117500.1 | 3.6003  | 27.7063  | -2.944  | Down | 2.15E-218 | 1.24E-216 |



|               |                    |         |         |         |      |           |           |
|---------------|--------------------|---------|---------|---------|------|-----------|-----------|
| Unigene30455  | Potri.006G204100.1 | 3.1332  | 24.1111 | -2.944  | Down | 1.30E-27  | 7.35E-27  |
| Unigene117888 | Potri.002G139200.1 | 2.6779  | 20.6078 | -2.944  | Down | 2.51E-36  | 1.80E-35  |
| Unigene31459  | Potri.001G259100.7 | 0.7253  | 5.5813  | -2.944  | Down | 4.43E-10  | 1.27E-09  |
| Unigene118769 | Potri.T061200.1    | 0.5372  | 4.1343  | -2.9441 | Down | 4.43E-10  | 1.27E-09  |
| Unigene97623  | Potri.019G002800.2 | 0.535   | 4.1173  | -2.9441 | Down | 4.43E-10  | 1.27E-09  |
| Unigene104582 | Potri.013G154600.4 | 0.9742  | 7.4972  | -2.9441 | Down | 7.08E-19  | 3.02E-18  |
| Unigene119192 | Potri.013G012400.4 | 0.4266  | 3.2831  | -2.9441 | Down | 4.43E-10  | 1.27E-09  |
| Unigene42808  | Potri.008G125500.2 | 6.2698  | 48.2535 | -2.9441 | Down | 3.80E-269 | 2.90E-267 |
| Unigene48213  | Potri.001G424000.1 | 4.7144  | 36.3011 | -2.9449 | Down | 8.05E-44  | 6.88E-43  |
| Unigene39739  | Potri.005G189800.1 | 3.5778  | 27.5581 | -2.9453 | Down | 1.23E-109 | 2.96E-108 |
| Unigene12433  | Potri.001G148400.3 | 2.018   | 15.545  | -2.9455 | Down | 3.77E-76  | 5.84E-75  |
| Unigene33725  | Potri.007G112400.4 | 2.1005  | 16.1838 | -2.9457 | Down | 1.29E-42  | 1.08E-41  |
| Unigene42435  | Potri.016G083600.3 | 10.3819 | 80.0068 | -2.9461 | Down | 0         | 0         |
| Unigene102017 | Potri.014G125600.2 | 1.0946  | 8.4362  | -2.9462 | Down | 1.16E-17  | 4.72E-17  |
| Unigene4402   | Potri.006G192800.1 | 1.2433  | 9.5826  | -2.9462 | Down | 1.16E-17  | 4.72E-17  |
| Unigene47438  | Potri.003G190300.2 | 0.869   | 6.6975  | -2.9462 | Down | 1.16E-17  | 4.72E-17  |
| Unigene4689   | Potri.007G132100.1 | 1.0786  | 8.3219  | -2.9478 | Down | 3.32E-40  | 2.62E-39  |
| Unigene51230  | Potri.019G072900.1 | 0.7005  | 5.4083  | -2.9487 | Down | 1.90E-16  | 7.38E-16  |
| Unigene106803 | Potri.013G062500.4 | 0.5145  | 3.9723  | -2.9487 | Down | 7.53E-09  | 2.01E-08  |
| Unigene96904  | Potri.013G034200.1 | 0.7314  | 5.6469  | -2.9487 | Down | 7.53E-09  | 2.01E-08  |
| Unigene116893 | Potri.008G214400.1 | 0.6661  | 5.1427  | -2.9487 | Down | 7.53E-09  | 2.01E-08  |
| Unigene105294 | Potri.003G211800.1 | 0.6602  | 5.0972  | -2.9487 | Down | 1.90E-16  | 7.38E-16  |
| Unigene114839 | Potri.015G061800.1 | 1.6159  | 12.4763 | -2.9488 | Down | 1.90E-16  | 7.38E-16  |
| Unigene16815  | Potri.014G132100.1 | 0.5709  | 4.4081  | -2.9488 | Down | 7.53E-09  | 2.01E-08  |
| Unigene1878   | Potri.004G014200.1 | 1.2335  | 9.5242  | -2.9488 | Down | 5.62E-54  | 5.94E-53  |
| Unigene102146 | Potri.001G168100.1 | 1.0507  | 8.1125  | -2.9488 | Down | 1.90E-16  | 7.38E-16  |
| Unigene35768  | Potri.009G053100.1 | 0.4973  | 3.8399  | -2.9489 | Down | 7.53E-09  | 2.01E-08  |
| Unigene65432  | Potri.001G449600.1 | 8.0002  | 61.789  | -2.9492 | Down | 1.27E-97  | 2.63E-96  |
| Unigene38959  | Potri.015G083200.1 | 4.7365  | 36.5972 | -2.9498 | Down | 3.29E-161 | 1.30E-159 |
| Unigene118768 | Potri.014G110500.1 | 2.2257  | 17.1986 | -2.95   | Down | 8.56E-38  | 6.37E-37  |
| Unigene9361   | Potri.007G043300.2 | 4.1129  | 31.7815 | -2.95   | Down | 8.56E-38  | 6.37E-37  |
| Unigene46062  | Potri.003G181400.2 | 3.9173  | 30.2765 | -2.9503 | Down | 2.72E-30  | 1.66E-29  |
| Unigene6003   | Potri.006G133000.5 | 1.6864  | 13.0388 | -2.9508 | Down | 8.94E-23  | 4.36E-22  |
| Unigene30863  | Potri.001G173500.1 | 1.097   | 8.482   | -2.9508 | Down | 8.94E-23  | 4.36E-22  |
| Unigene34057  | Potri.010G209300.1 | 9.0461  | 69.957  | -2.9511 | Down | 8.11E-93  | 1.58E-91  |
| Unigene56762  | Potri.010G004400.2 | 2.2627  | 17.5072 | -2.9518 | Down | 7.07E-43  | 5.92E-42  |
| Unigene40767  | Potri.001G037600.1 | 0.9241  | 7.1501  | -2.9518 | Down | 3.13E-15  | 1.15E-14  |
| Unigene49711  | Potri.007G069100.1 | 1.0547  | 8.161   | -2.9519 | Down | 4.39E-29  | 2.60E-28  |
| Unigene1024   | Potri.009G122600.1 | 6.2948  | 48.7222 | -2.9523 | Down | 0         | 0         |

|               |                    |          |           |         |      |           |           |
|---------------|--------------------|----------|-----------|---------|------|-----------|-----------|
| Unigene79106  | Potri.006G117900.1 | 131.7917 | 1020.2019 | -2.9525 | Down | 0         | 0         |
| Unigene28313  | Potri.003G146500.3 | 1.7349   | 13.434    | -2.953  | Down | 1.45E-21  | 6.82E-21  |
| Unigene31660  | Potri.001G265400.1 | 10.9412  | 84.7334   | -2.9532 | Down | 3.07E-194 | 1.54E-192 |
| Unigene11436  | Potri.001G361200.2 | 1.0109   | 7.8315    | -2.9536 | Down | 4.41E-113 | 1.10E-111 |
| Unigene54445  | Potri.006G186800.2 | 3.73     | 28.9024   | -2.9539 | Down | 3.56E-34  | 2.42E-33  |
| Unigene43643  | Potri.003G167400.1 | 3.583    | 27.7634   | -2.9539 | Down | 2.40E-99  | 5.11E-98  |
| Unigene79591  | Potri.016G065900.7 | 33.4621  | 259.3021  | -2.954  | Down | 2.05E-274 | 1.60E-272 |
| Unigene7293   | Potri.014G013800.2 | 9.8464   | 76.3249   | -2.9545 | Down | 1.82E-149 | 6.49E-148 |
| Unigene29384  | Potri.006G132600.1 | 3.303    | 25.604    | -2.9545 | Down | 4.92E-53  | 5.11E-52  |
| Unigene28390  | Potri.003G067600.1 | 1.6462   | 12.7606   | -2.9545 | Down | 4.92E-53  | 5.11E-52  |
| Unigene18475  | Potri.002G139400.1 | 3.747    | 29.0532   | -2.9549 | Down | 2.09E-84  | 3.64E-83  |
| Unigene116136 | Potri.018G047700.7 | 0.6036   | 4.6818    | -2.9554 | Down | 1.29E-07  | 3.18E-07  |
| Unigene116699 | Potri.015G028400.1 | 0.5669   | 4.3972    | -2.9554 | Down | 1.29E-07  | 3.18E-07  |
| Unigene117975 | Potri.014G042600.2 | 0.4698   | 3.644     | -2.9554 | Down | 1.29E-07  | 3.18E-07  |
| Unigene4514   | Potri.001G403700.3 | 0.4857   | 3.7674    | -2.9554 | Down | 1.29E-07  | 3.18E-07  |
| Unigene52402  | Potri.018G040900.1 | 1.1638   | 9.0276    | -2.9555 | Down | 1.15E-26  | 6.32E-26  |
| Unigene94880  | Potri.008G063500.1 | 0.7285   | 5.651     | -2.9555 | Down | 1.29E-07  | 3.18E-07  |
| Unigene47206  | Potri.005G135100.1 | 0.743    | 5.7636    | -2.9555 | Down | 1.29E-07  | 3.18E-07  |
| Unigene34912  | Potri.003G190700.1 | 1.0978   | 8.5154    | -2.9555 | Down | 4.14E-58  | 4.75E-57  |
| Unigene119172 | Potri.003G091900.1 | 0.6196   | 4.8062    | -2.9555 | Down | 5.18E-14  | 1.81E-13  |
| Unigene25964  | Potri.002G045600.1 | 0.9187   | 7.1264    | -2.9555 | Down | 1.29E-07  | 3.18E-07  |
| Unigene79267  | Potri.001G060100.2 | 17.0247  | 132.0609  | -2.9555 | Down | 1.33E-139 | 4.33E-138 |
| Unigene119357 | Potri.001G007800.1 | 0.7858   | 6.0955    | -2.9555 | Down | 2.37E-20  | 1.07E-19  |
| Unigene116774 | Potri.006G142200.1 | 0.5634   | 4.3706    | -2.9556 | Down | 1.29E-07  | 3.18E-07  |
| Unigene105061 | Potri.001G111600.1 | 0.7024   | 5.4488    | -2.9556 | Down | 5.18E-14  | 1.81E-13  |
| Unigene16381  | Potri.001G236800.1 | 0.42     | 3.2583    | -2.9557 | Down | 1.29E-07  | 3.18E-07  |
| Unigene21606  | Potri.007G091900.1 | 8.4554   | 65.6078   | -2.9559 | Down | 0         | 0         |
| Unigene1990   | Potri.019G079300.1 | 11.0818  | 86.0002   | -2.9561 | Down | 5.44E-156 | 2.05E-154 |
| Unigene41630  | Potri.005G242000.1 | 10.1726  | 78.9736   | -2.9567 | Down | 9.76E-130 | 2.89E-128 |
| Unigene53327  | Potri.005G222500.2 | 3.797    | 29.4772   | -2.9567 | Down | 2.42E-44  | 2.09E-43  |
| Unigene45654  | Potri.004G199400.5 | 3.1864   | 24.7371   | -2.9567 | Down | 2.42E-44  | 2.09E-43  |
| Unigene14252  | Potri.015G003700.2 | 3.9263   | 30.5007   | -2.9576 | Down | 2.01E-49  | 1.94E-48  |
| Unigene2133   | Potri.017G094400.1 | 7.1626   | 55.6672   | -2.9583 | Down | 1.52E-201 | 7.98E-200 |
| Unigene49208  | Potri.010G046000.4 | 4.101    | 31.8747   | -2.9584 | Down | 1.69E-54  | 1.80E-53  |
| Unigene53501  | Potri.006G251900.1 | 2.5724   | 19.9936   | -2.9584 | Down | 3.87E-19  | 1.67E-18  |
| Unigene46977  | Potri.004G165400.1 | 1.0042   | 7.8052    | -2.9584 | Down | 3.87E-19  | 1.67E-18  |
| Unigene63005  | Potri.004G097100.1 | 2.2655   | 17.6083   | -2.9584 | Down | 7.53E-37  | 5.48E-36  |
| Unigene103754 | Potri.001G201500.2 | 0.9564   | 7.4335    | -2.9584 | Down | 3.87E-19  | 1.67E-18  |
| Unigene51835  | Potri.005G007000.1 | 1.1867   | 9.2257    | -2.9587 | Down | 3.22E-48  | 3.03E-47  |

|               |                    |         |          |         |      |           |           |
|---------------|--------------------|---------|----------|---------|------|-----------|-----------|
| Unigene10579  | Potri.011G095600.1 | 1.5741  | 12.2399  | -2.959  | Down | 1.49E-30  | 9.17E-30  |
| Unigene5399   | Potri.001G216600.1 | 1.1229  | 8.7313   | -2.959  | Down | 1.49E-30  | 9.17E-30  |
| Unigene227    | Potri.016G085500.1 | 2.8462  | 22.133   | -2.9591 | Down | 4.88E-169 | 2.05E-167 |
| Unigene77352  | Potri.001G449500.7 | 53.931  | 419.4222 | -2.9592 | Down | 0         | 0         |
| Unigene23823  | Potri.006G184200.1 | 2.8692  | 22.3144  | -2.9593 | Down | 6.21E-42  | 5.09E-41  |
| Unigene31928  | Potri.007G009200.1 | 2.4819  | 19.3095  | -2.9598 | Down | 5.82E-178 | 2.61E-176 |
| Unigene65095  | Potri.014G086700.1 | 0.59    | 4.5906   | -2.9599 | Down | 8.60E-13  | 2.84E-12  |
| Unigene115967 | Potri.011G058500.1 | 1.1043  | 8.5922   | -2.9599 | Down | 8.60E-13  | 2.84E-12  |
| Unigene117639 | Potri.010G055200.3 | 0.8976  | 6.9841   | -2.9599 | Down | 8.60E-13  | 2.84E-12  |
| Unigene103647 | Potri.009G084600.3 | 0.7212  | 5.6113   | -2.9599 | Down | 3.01E-24  | 1.54E-23  |
| Unigene119058 | Potri.002G084800.1 | 0.5963  | 4.6395   | -2.9599 | Down | 8.60E-13  | 2.84E-12  |
| Unigene63934  | Potri.001G032800.1 | 1.2163  | 9.4639   | -2.9599 | Down | 8.60E-13  | 2.84E-12  |
| Unigene30432  | Potri.010G057100.1 | 6.0851  | 47.3481  | -2.96   | Down | 1.01E-137 | 3.23E-136 |
| Unigene52272  | Potri.004G032500.5 | 1.2742  | 9.9215   | -2.961  | Down | 2.40E-29  | 1.43E-28  |
| Unigene88481  | Potri.010G247500.5 | 30.8224 | 240.0284 | -2.9612 | Down | 0         | 0         |
| Unigene23008  | Potri.002G065000.2 | 1.5233  | 11.8633  | -2.9612 | Down | 8.25E-46  | 7.38E-45  |
| Unigene102091 | Potri.012G007400.1 | 0.8674  | 6.7574   | -2.9617 | Down | 6.33E-18  | 2.61E-17  |
| Unigene38129  | Potri.001G342300.4 | 5.0161  | 39.0766  | -2.9617 | Down | 3.94E-100 | 8.45E-99  |
| Unigene29425  | Potri.004G169300.2 | 3.8186  | 29.7532  | -2.9619 | Down | 2.19E-72  | 3.19E-71  |
| Unigene29874  | Potri.018G067200.3 | 4.9965  | 38.9333  | -2.962  | Down | 5.78E-56  | 6.37E-55  |
| Unigene44327  | Potri.002G191000.2 | 4.1768  | 32.5458  | -2.962  | Down | 2.91E-110 | 7.05E-109 |
| Unigene45088  | Potri.002G040100.2 | 1.7242  | 13.4363  | -2.9621 | Down | 1.60E-39  | 1.24E-38  |
| Unigene33489  | Potri.014G036500.1 | 0.7558  | 5.8913   | -2.9625 | Down | 4.89E-23  | 2.40E-22  |
| Unigene37999  | Potri.014G086500.1 | 1.1941  | 9.3084   | -2.9626 | Down | 4.89E-23  | 2.40E-22  |
| Unigene22536  | Potri.013G067800.1 | 1.6838  | 13.1286  | -2.9629 | Down | 2.97E-76  | 4.60E-75  |
| Unigene22390  | Potri.019G070300.1 | 1.2144  | 9.47     | -2.9631 | Down | 3.88E-28  | 2.23E-27  |
| Unigene43878  | Potri.006G033500.1 | 5.2736  | 41.1259  | -2.9632 | Down | 1.81E-192 | 9.01E-191 |
| Unigene14325  | Potri.005G131300.1 | 7.6748  | 59.8644  | -2.9635 | Down | 6.56E-65  | 8.50E-64  |
| Unigene56883  | Potri.011G138200.1 | 7.4599  | 58.1941  | -2.9636 | Down | 5.56E-70  | 7.81E-69  |
| Unigene41934  | Potri.006G152800.2 | 1.901   | 14.8311  | -2.9638 | Down | 2.57E-38  | 1.93E-37  |
| Unigene53505  | Potri.001G244600.2 | 6.7984  | 53.0524  | -2.9642 | Down | 1.76E-48  | 1.67E-47  |
| Unigene14820  | Potri.001G200400.1 | 6.431   | 50.193   | -2.9644 | Down | 1.24E-58  | 1.44E-57  |
| Unigene47931  | Potri.017G143600.2 | 0.7208  | 5.6298   | -2.9654 | Down | 2.26E-06  | 5.06E-06  |
| Unigene109246 | Potri.013G078200.3 | 0.7005  | 5.4712   | -2.9654 | Down | 2.26E-06  | 5.06E-06  |
| Unigene51924  | Potri.002G076300.1 | 0.8109  | 6.3335   | -2.9654 | Down | 1.04E-16  | 4.08E-16  |
| Unigene118107 | Potri.001G166500.3 | 0.7332  | 5.7266   | -2.9654 | Down | 1.44E-11  | 4.46E-11  |
| Unigene50800  | Potri.013G074500.1 | 2.0345  | 15.8914  | -2.9655 | Down | 5.05E-32  | 3.24E-31  |
| Unigene115606 | Potri.012G143400.1 | 0.5092  | 3.9774   | -2.9655 | Down | 2.26E-06  | 5.06E-06  |
| Unigene115999 | Potri.011G121900.1 | 0.4908  | 3.8335   | -2.9655 | Down | 2.26E-06  | 5.06E-06  |

|               |                    |         |          |         |      |           |           |
|---------------|--------------------|---------|----------|---------|------|-----------|-----------|
| Unigene115939 | Potri.009G131600.1 | 0.4924  | 3.8461   | -2.9655 | Down | 2.26E-06  | 5.06E-06  |
| Unigene101641 | Potri.008G178600.1 | 1.0325  | 8.0649   | -2.9655 | Down | 1.44E-11  | 4.46E-11  |
| Unigene49327  | Potri.008G164400.1 | 8.2888  | 64.7428  | -2.9655 | Down | 3.46E-113 | 8.63E-112 |
| Unigene114138 | Potri.006G184800.3 | 0.563   | 4.3976   | -2.9655 | Down | 2.26E-06  | 5.06E-06  |
| Unigene102145 | Potri.006G113000.2 | 0.5445  | 4.2532   | -2.9655 | Down | 1.44E-11  | 4.46E-11  |
| Unigene115921 | Potri.006G043600.1 | 0.4924  | 3.8461   | -2.9655 | Down | 2.26E-06  | 5.06E-06  |
| Unigene6230   | Potri.005G111700.1 | 0.8542  | 6.672    | -2.9655 | Down | 1.04E-16  | 4.08E-16  |
| Unigene60363  | Potri.002G218100.1 | 0.3947  | 3.083    | -2.9655 | Down | 2.26E-06  | 5.06E-06  |
| Unigene68962  | Potri.002G011500.1 | 0.411   | 3.2104   | -2.9655 | Down | 2.26E-06  | 5.06E-06  |
| Unigene116871 | Potri.014G096300.2 | 0.444   | 3.4684   | -2.9656 | Down | 2.26E-06  | 5.06E-06  |
| Unigene15737  | Potri.013G006600.2 | 0.4973  | 3.8846   | -2.9656 | Down | 2.26E-06  | 5.06E-06  |
| Unigene3582   | Potri.007G105300.1 | 0.5738  | 4.4822   | -2.9656 | Down | 1.44E-11  | 4.46E-11  |
| Unigene98343  | Potri.002G165800.1 | 0.3855  | 3.0113   | -2.9656 | Down | 2.26E-06  | 5.06E-06  |
| Unigene97236  | Potri.001G448000.1 | 0.5118  | 3.9978   | -2.9656 | Down | 1.44E-11  | 4.46E-11  |
| Unigene111901 | Potri.001G189700.1 | 0.6295  | 4.9172   | -2.9656 | Down | 2.26E-06  | 5.06E-06  |
| Unigene40954  | Potri.015G147600.4 | 22.8265 | 178.3218 | -2.9657 | Down | 3.01E-299 | 2.66E-297 |
| Unigene22817  | Potri.001G200400.1 | 7.628   | 59.6162  | -2.9663 | Down | 2.69E-151 | 9.76E-150 |
| Unigene7627   | Potri.001G003800.3 | 2.5621  | 20.0284  | -2.9666 | Down | 3.16E-56  | 3.50E-55  |
| Unigene22876  | Potri.003G128400.1 | 0.6529  | 5.1054   | -2.9671 | Down | 5.45E-41  | 4.38E-40  |
| Unigene106285 | Potri.014G078000.1 | 1.0778  | 8.4308   | -2.9676 | Down | 8.14E-31  | 5.06E-30  |
| Unigene39987  | Potri.006G114300.1 | 2.4101  | 18.8561  | -2.9679 | Down | 5.05E-55  | 5.46E-54  |
| Unigene43468  | Potri.002G136600.1 | 3.2092  | 25.1158  | -2.9683 | Down | 2.28E-136 | 7.19E-135 |
| Unigene11954  | Potri.006G092600.2 | 0.9816  | 7.6845   | -2.9687 | Down | 1.30E-20  | 5.89E-20  |
| Unigene11285  | Potri.001G328900.1 | 6.3279  | 49.5357  | -2.9687 | Down | 1.35E-278 | 1.07E-276 |
| Unigene68011  | Potri.001G445800.1 | 1.2716  | 9.955    | -2.9688 | Down | 1.30E-20  | 5.89E-20  |
| Unigene2129   | Potri.009G008300.1 | 4.8485  | 37.9613  | -2.9689 | Down | 4.18E-130 | 1.24E-128 |
| Unigene26225  | Potri.011G022800.2 | 4.2197  | 33.0412  | -2.9691 | Down | 6.56E-73  | 9.64E-72  |
| Unigene12911  | Potri.017G071700.3 | 2.1793  | 17.0674  | -2.9693 | Down | 1.07E-34  | 7.32E-34  |
| Unigene22386  | Potri.001G255100.1 | 13.1124 | 102.7113 | -2.9696 | Down | 0         | 0         |
| Unigene49100  | Potri.009G139600.1 | 5.7912  | 45.367   | -2.9697 | Down | 8.89E-77  | 1.39E-75  |
| Unigene16162  | Potri.013G046900.4 | 1.7459  | 13.6801  | -2.97   | Down | 1.31E-29  | 7.89E-29  |
| Unigene104246 | Potri.010G067000.1 | 0.6793  | 5.3225   | -2.97   | Down | 1.71E-15  | 6.36E-15  |
| Unigene68162  | Potri.001G020300.1 | 1.3677  | 10.7161  | -2.97   | Down | 1.71E-15  | 6.36E-15  |
| Unigene46421  | Potri.003G093700.1 | 1.7471  | 13.6931  | -2.9704 | Down | 1.29E-52  | 1.33E-51  |
| Unigene52908  | Potri.009G043600.1 | 4.174   | 32.7222  | -2.9708 | Down | 1.46E-61  | 1.78E-60  |
| Unigene55982  | Potri.018G067200.3 | 1.8097  | 14.1894  | -2.971  | Down | 1.65E-24  | 8.49E-24  |
| Unigene41787  | Potri.003G121300.1 | 1.519   | 11.9101  | -2.971  | Down | 1.65E-24  | 8.49E-24  |
| Unigene48821  | Potri.018G016500.1 | 1.4378  | 11.2855  | -2.9725 | Down | 2.47E-46  | 2.23E-45  |
| Unigene102301 | Potri.018G006000.1 | 0.8263  | 6.4856   | -2.9725 | Down | 2.41E-10  | 7.02E-10  |

|               |                     |         |          |         |      |           |           |
|---------------|---------------------|---------|----------|---------|------|-----------|-----------|
| Unigene106216 | Potri.006G244000.1  | 0.7193  | 5.6459   | -2.9725 | Down | 2.41E-10  | 7.02E-10  |
| Unigene51631  | Potri.003G204300.3  | 1.2553  | 9.8531   | -2.9725 | Down | 2.41E-10  | 7.02E-10  |
| Unigene101358 | Potri.019G055500.1  | 1.2125  | 9.5175   | -2.9726 | Down | 2.12E-28  | 1.23E-27  |
| Unigene35360  | Potri.016G121800.1  | 1.9661  | 15.4326  | -2.9726 | Down | 4.81E-91  | 9.14E-90  |
| Unigene97097  | Potri.012G111800.1  | 0.6835  | 5.365    | -2.9726 | Down | 2.11E-19  | 9.20E-19  |
| Unigene12900  | Potri.009G053700.22 | 1.7206  | 13.5054  | -2.9726 | Down | 2.25E-37  | 1.66E-36  |
| Unigene105406 | Potri.006G190200.1  | 1.032   | 8.1006   | -2.9726 | Down | 2.11E-19  | 9.20E-19  |
| Unigene27324  | Potri.003G080800.2  | 0.6072  | 4.7662   | -2.9726 | Down | 2.41E-10  | 7.02E-10  |
| Unigene93266  | Potri.015G054600.1  | 44.9213 | 352.8014 | -2.9734 | Down | 0         | 0         |
| Unigene39137  | Potri.005G255500.1  | 16.439  | 129.1057 | -2.9734 | Down | 7.73E-187 | 3.70E-185 |
| Unigene26221  | Potri.019G093400.1  | 33.6525 | 264.3294 | -2.9736 | Down | 0         | 0         |
| Unigene9132   | Potri.011G047500.1  | 3.9619  | 31.1279  | -2.9739 | Down | 4.41E-54  | 4.68E-53  |
| Unigene28281  | Potri.008G183200.3  | 0.9537  | 7.4967   | -2.9746 | Down | 3.62E-36  | 2.59E-35  |
| Unigene107226 | Potri.002G094000.1  | 1.1303  | 8.8849   | -2.9746 | Down | 3.62E-36  | 2.59E-35  |
| Unigene90660  | Potri.002G201500.4  | 74.1197 | 582.6338 | -2.9747 | Down | 0         | 0         |
| Unigene81095  | Potri.005G132300.1  | 32.8591 | 258.3335 | -2.9749 | Down | 1.73E-285 | 1.43E-283 |
| Unigene88001  | Potri.005G255500.1  | 28.0319 | 220.4023 | -2.975  | Down | 0         | 0         |
| Unigene104515 | Potri.016G056600.5  | 0.818   | 6.4332   | -2.9754 | Down | 2.83E-14  | 9.97E-14  |
| Unigene2821   | Potri.011G154300.1  | 0.8828  | 6.9432   | -2.9754 | Down | 3.43E-27  | 1.92E-26  |
| Unigene26731  | Potri.001G394900.1  | 0.8458  | 6.652    | -2.9754 | Down | 2.83E-14  | 9.97E-14  |
| Unigene35245  | Potri.010G199600.4  | 2.6478  | 20.8368  | -2.9763 | Down | 4.45E-31  | 2.78E-30  |
| Unigene33457  | Potri.007G076700.4  | 0.9471  | 7.4562   | -2.9769 | Down | 3.46E-18  | 1.44E-17  |
| Unigene106593 | Potri.012G042300.2  | 0.633   | 4.9838   | -2.977  | Down | 3.46E-18  | 1.44E-17  |
| Unigene31134  | Potri.007G109000.2  | 1.3582  | 10.6935  | -2.977  | Down | 3.46E-18  | 1.44E-17  |
| Unigene11007  | Potri.001G347400.2  | 1.1861  | 9.3413   | -2.9774 | Down | 7.67E-39  | 5.84E-38  |
| Unigene94516  | Potri.005G140700.2  | 2.8945  | 22.8035  | -2.9779 | Down | 1.96E-227 | 1.19E-225 |
| Unigene28879  | Potri.005G127100.1  | 3.4397  | 27.099   | -2.9779 | Down | 1.02E-42  | 8.48E-42  |
| Unigene97661  | Potri.003G115700.1  | 1.6278  | 12.8272  | -2.9782 | Down | 1.35E-46  | 1.23E-45  |
| Unigene15597  | Potri.010G068100.1  | 6.644   | 52.3663  | -2.9785 | Down | 6.74E-75  | 1.02E-73  |
| Unigene104374 | Potri.007G036600.3  | 1.2393  | 9.7695   | -2.9788 | Down | 2.41E-54  | 2.57E-53  |
| Unigene41713  | Potri.011G027500.1  | 3.7035  | 29.2126  | -2.9796 | Down | 1.23E-37  | 9.13E-37  |
| Unigene11147  | Potri.002G103500.2  | 2.0916  | 16.5027  | -2.98   | Down | 7.07E-133 | 2.16E-131 |
| Unigene29322  | Potri.013G073800.3  | 2.2646  | 17.8681  | -2.9801 | Down | 2.16E-45  | 1.91E-44  |
| Unigene42177  | Potri.001G210100.1  | 5.3285  | 42.0543  | -2.9805 | Down | 5.17E-57  | 5.81E-56  |
| Unigene22175  | Potri.005G043900.1  | 6.0107  | 47.4593  | -2.9811 | Down | 1.07E-95  | 2.16E-94  |
| Unigene114657 | Potri.017G032000.5  | 0.4084  | 3.2265   | -2.9819 | Down | 4.06E-05  | 8.11E-05  |
| Unigene4641   | Potri.016G136900.2  | 0.4207  | 3.3236   | -2.9819 | Down | 4.06E-05  | 8.11E-05  |
| Unigene110982 | Potri.015G122000.1  | 0.4908  | 3.8775   | -2.9819 | Down | 4.06E-05  | 8.11E-05  |
| Unigene113359 | Potri.014G151900.2  | 0.4423  | 3.4944   | -2.9819 | Down | 4.06E-05  | 8.11E-05  |

|               |                    |         |          |         |      |           |           |
|---------------|--------------------|---------|----------|---------|------|-----------|-----------|
| Unigene108514 | Potri.014G022600.1 | 0.538   | 4.2504   | -2.9819 | Down | 4.06E-05  | 8.11E-05  |
| Unigene105259 | Potri.008G067100.6 | 0.5157  | 4.0741   | -2.9819 | Down | 5.67E-17  | 2.25E-16  |
| Unigene106155 | Potri.005G175400.1 | 0.7314  | 5.7783   | -2.9819 | Down | 4.09E-09  | 1.11E-08  |
| Unigene105610 | Potri.004G231500.1 | 0.7544  | 5.9601   | -2.9819 | Down | 4.69E-13  | 1.57E-12  |
| Unigene52571  | Potri.001G160600.1 | 0.8012  | 6.3299   | -2.9819 | Down | 4.69E-13  | 1.57E-12  |
| Unigene94706  | Potri.T091900.1    | 1.213   | 9.5835   | -2.982  | Down | 5.67E-17  | 2.25E-16  |
| Unigene115423 | Potri.018G110300.4 | 0.3872  | 3.0591   | -2.982  | Down | 4.06E-05  | 8.11E-05  |
| Unigene107126 | Potri.017G009500.1 | 0.3806  | 3.0071   | -2.982  | Down | 4.09E-09  | 1.11E-08  |
| Unigene113571 | Potri.015G020000.1 | 0.8742  | 6.9068   | -2.982  | Down | 4.09E-09  | 1.11E-08  |
| Unigene76801  | Potri.014G066000.4 | 7.3618  | 58.1628  | -2.982  | Down | 1.11E-59  | 1.31E-58  |
| Unigene20140  | Potri.013G071300.1 | 1.2274  | 9.6973   | -2.982  | Down | 4.61E-48  | 4.33E-47  |
| Unigene113940 | Potri.011G126600.2 | 0.8542  | 6.7487   | -2.982  | Down | 4.09E-09  | 1.11E-08  |
| Unigene110421 | Potri.010G161600.3 | 0.5018  | 3.9645   | -2.982  | Down | 4.06E-05  | 8.11E-05  |
| Unigene106835 | Potri.010G105400.2 | 0.8632  | 6.8202   | -2.982  | Down | 1.51E-32  | 9.82E-32  |
| Unigene100416 | Potri.010G053700.1 | 0.4025  | 3.1801   | -2.982  | Down | 4.06E-05  | 8.11E-05  |
| Unigene92809  | Potri.009G166900.2 | 18.5394 | 146.4739 | -2.982  | Down | 0         | 0         |
| Unigene102625 | Potri.009G116300.1 | 0.7664  | 6.0553   | -2.982  | Down | 4.09E-09  | 1.11E-08  |
| Unigene115553 | Potri.009G116300.1 | 0.7664  | 6.0553   | -2.982  | Down | 4.09E-09  | 1.11E-08  |
| Unigene116686 | Potri.007G127000.1 | 0.6823  | 5.3907   | -2.982  | Down | 4.09E-09  | 1.11E-08  |
| Unigene118719 | Potri.007G018100.4 | 0.4682  | 3.6991   | -2.982  | Down | 4.09E-09  | 1.11E-08  |
| Unigene95779  | Potri.005G058100.1 | 0.4354  | 3.44     | -2.982  | Down | 4.06E-05  | 8.11E-05  |
| Unigene113196 | Potri.004G006200.1 | 0.4458  | 3.5222   | -2.982  | Down | 4.06E-05  | 8.11E-05  |
| Unigene37407  | Potri.002G257300.1 | 0.6322  | 4.9948   | -2.982  | Down | 4.69E-13  | 1.57E-12  |
| Unigene15246  | Potri.001G179500.1 | 2.422   | 19.1358  | -2.982  | Down | 7.07E-21  | 3.24E-20  |
| Unigene45303  | Potri.001G108800.1 | 4.5673  | 36.0847  | -2.982  | Down | 1.70E-94  | 3.39E-93  |
| Unigene115527 | Potri.018G074500.2 | 0.3845  | 3.0381   | -2.9821 | Down | 4.06E-05  | 8.11E-05  |
| Unigene103124 | Potri.018G016300.1 | 0.5458  | 4.3126   | -2.9821 | Down | 4.06E-05  | 8.11E-05  |
| Unigene96731  | Potri.012G080200.1 | 0.4091  | 3.2324   | -2.9821 | Down | 4.09E-09  | 1.11E-08  |
| Unigene105108 | Potri.008G193200.4 | 0.4731  | 3.7382   | -2.9821 | Down | 4.09E-09  | 1.11E-08  |
| Unigene98816  | Potri.008G086400.2 | 0.4741  | 3.7461   | -2.9821 | Down | 4.06E-05  | 8.11E-05  |
| Unigene113874 | Potri.001G006300.1 | 0.4287  | 3.3873   | -2.9821 | Down | 4.06E-05  | 8.11E-05  |
| Unigene11702  | Potri.015G083200.1 | 10.8859 | 86.0261  | -2.9823 | Down | 0         | 0         |
| Unigene83765  | Potri.014G175200.5 | 23.7236 | 187.4817 | -2.9824 | Down | 1.28E-224 | 7.60E-223 |
| Unigene19446  | Potri.016G135100.1 | 4.3694  | 34.5593  | -2.9836 | Down | 1.32E-54  | 1.41E-53  |
| Unigene31835  | Potri.011G032700.1 | 10.4106 | 82.3629  | -2.9839 | Down | 0         | 0         |
| Unigene36516  | Potri.010G249700.3 | 7.7622  | 61.4249  | -2.9843 | Down | 1.18E-147 | 4.16E-146 |
| Unigene74759  | Potri.017G107600.4 | 18.9076 | 149.6297 | -2.9844 | Down | 8.63E-144 | 2.91E-142 |
| Unigene40610  | Potri.001G462600.1 | 5.8509  | 46.3312  | -2.9853 | Down | 2.11E-53  | 2.21E-52  |
| Unigene87352  | Potri.015G002800.1 | 16.5116 | 130.7939 | -2.9857 | Down | 1.79E-181 | 8.24E-180 |

|               |                    |         |          |         |      |           |           |
|---------------|--------------------|---------|----------|---------|------|-----------|-----------|
| Unigene61773  | Potri.018G121600.2 | 4.5838  | 36.3119  | -2.9858 | Down | 1.10E-67  | 1.49E-66  |
| Unigene29639  | Potri.014G115800.1 | 1.8514  | 14.6661  | -2.9858 | Down | 1.18E-45  | 1.05E-44  |
| Unigene117110 | Potri.019G041900.1 | 1.8379  | 14.5599  | -2.9859 | Down | 1.46E-23  | 7.28E-23  |
| Unigene31847  | Potri.004G083300.3 | 5.8917  | 46.6759  | -2.9859 | Down | 0         | 0         |
| Unigene25715  | Potri.002G119400.1 | 1.7516  | 13.8761  | -2.9859 | Down | 1.46E-23  | 7.28E-23  |
| Unigene89872  | Potri.010G083300.4 | 8.0291  | 63.6175  | -2.9861 | Down | 5.95E-104 | 1.33E-102 |
| Unigene31547  | Potri.011G128900.2 | 2.3522  | 18.6445  | -2.9867 | Down | 1.15E-19  | 5.07E-19  |
| Unigene50739  | Potri.006G275000.1 | 5.8894  | 46.6813  | -2.9867 | Down | 4.51E-56  | 4.98E-55  |
| Unigene58447  | Potri.008G078900.1 | 12.7409 | 101.0598 | -2.9877 | Down | 3.74E-91  | 7.11E-90  |
| Unigene86797  | Potri.001G265600.1 | 24.8664 | 197.249  | -2.9877 | Down | 5.36E-266 | 4.03E-264 |
| Unigene8662   | Potri.004G117000.2 | 0.952   | 7.5522   | -2.9879 | Down | 9.32E-16  | 3.51E-15  |
| Unigene5336   | Potri.004G027300.1 | 1.0414  | 8.2614   | -2.9879 | Down | 9.32E-16  | 3.51E-15  |
| Unigene30507  | Potri.001G462600.2 | 1.3586  | 10.7782  | -2.9879 | Down | 9.32E-16  | 3.51E-15  |
| Unigene119410 | Potri.004G212600.6 | 0.5427  | 4.3056   | -2.988  | Down | 9.32E-16  | 3.51E-15  |
| Unigene45945  | Potri.018G008200.2 | 29.1306 | 231.148  | -2.9882 | Down | 1.07E-246 | 7.25E-245 |
| Unigene43478  | Potri.019G119200.1 | 3.3712  | 26.7568  | -2.9886 | Down | 4.09E-143 | 1.37E-141 |
| Unigene45022  | Potri.003G079700.1 | 2.4925  | 19.7864  | -2.9888 | Down | 1.10E-75  | 1.69E-74  |
| Unigene49705  | Potri.016G085500.1 | 3.5377  | 28.0882  | -2.9891 | Down | 2.07E-61  | 2.53E-60  |
| Unigene45252  | Potri.017G094700.1 | 0.7979  | 6.3394   | -2.9901 | Down | 2.37E-22  | 1.14E-21  |
| Unigene37808  | Potri.010G155400.5 | 0.6676  | 5.3041   | -2.9901 | Down | 7.82E-12  | 2.46E-11  |
| Unigene102437 | Potri.003G073100.2 | 2.1861  | 17.3694  | -2.9901 | Down | 2.37E-22  | 1.14E-21  |
| Unigene17473  | Potri.017G101600.3 | 1.5147  | 12.0352  | -2.9902 | Down | 8.23E-33  | 5.40E-32  |
| Unigene15778  | Potri.015G093500.2 | 0.5281  | 4.1963   | -2.9902 | Down | 7.82E-12  | 2.46E-11  |
| Unigene101400 | Potri.014G038400.1 | 0.6923  | 5.501    | -2.9902 | Down | 7.82E-12  | 2.46E-11  |
| Unigene63104  | Potri.002G036000.3 | 1.3441  | 10.6799  | -2.9902 | Down | 7.82E-12  | 2.46E-11  |
| Unigene106970 | Potri.014G107000.1 | 0.4633  | 3.6816   | -2.9903 | Down | 7.82E-12  | 2.46E-11  |
| Unigene94043  | Potri.006G173600.1 | 54.2445 | 431.2952 | -2.9911 | Down | 0         | 0         |
| Unigene45534  | Potri.008G205200.1 | 1.2875  | 10.2401  | -2.9916 | Down | 6.45E-46  | 5.78E-45  |
| Unigene9034   | Potri.002G074200.1 | 2.7395  | 21.7954  | -2.992  | Down | 1.74E-35  | 1.22E-34  |
| Unigene92839  | Potri.001G375800.1 | 37.3727 | 297.4493 | -2.9926 | Down | 0         | 0         |
| Unigene18325  | Potri.003G034700.1 | 3.3654  | 26.8002  | -2.9934 | Down | 3.75E-158 | 1.44E-156 |
| Unigene33253  | Potri.001G060100.2 | 7.7472  | 61.708   | -2.9937 | Down | 9.13E-234 | 5.71E-232 |
| Unigene39139  | Potri.001G118500.1 | 16.272  | 129.6297 | -2.9939 | Down | 0         | 0         |
| Unigene19715  | Potri.010G139300.1 | 2.0306  | 16.1777  | -2.994  | Down | 2.94E-51  | 2.94E-50  |
| Unigene48137  | Potri.014G144900.1 | 6.4343  | 51.2696  | -2.9942 | Down | 1.19E-258 | 8.57E-257 |
| Unigene118184 | Potri.010G099900.1 | 0.4505  | 3.5914   | -2.9949 | Down | 7.02E-08  | 1.76E-07  |
| Unigene99631  | Potri.006G087900.1 | 0.6036  | 4.8118   | -2.9949 | Down | 7.02E-08  | 1.76E-07  |
| Unigene113262 | Potri.017G143400.1 | 0.7401  | 5.9002   | -2.995  | Down | 7.02E-08  | 1.76E-07  |
| Unigene106821 | Potri.017G121100.3 | 0.5367  | 4.2787   | -2.995  | Down | 1.54E-14  | 5.50E-14  |

|               |                    |         |          |         |      |           |           |
|---------------|--------------------|---------|----------|---------|------|-----------|-----------|
| Unigene103696 | Potri.017G093700.2 | 1.1101  | 8.8503   | -2.995  | Down | 1.54E-14  | 5.50E-14  |
| Unigene24572  | Potri.007G020800.1 | 1.5023  | 11.9769  | -2.995  | Down | 2.20E-47  | 2.04E-46  |
| Unigene119085 | Potri.005G252100.1 | 0.6521  | 5.1988   | -2.995  | Down | 1.54E-14  | 5.50E-14  |
| Unigene3479   | Potri.004G113900.1 | 0.6387  | 5.092    | -2.995  | Down | 7.02E-08  | 1.76E-07  |
| Unigene111502 | Potri.003G131300.4 | 2.4013  | 19.144   | -2.995  | Down | 3.85E-21  | 1.78E-20  |
| Unigene111043 | Potri.002G212900.1 | 0.8144  | 6.4928   | -2.995  | Down | 7.02E-08  | 1.76E-07  |
| Unigene105092 | Potri.T150600.1    | 0.9955  | 7.9369   | -2.9951 | Down | 3.85E-21  | 1.78E-20  |
| Unigene3694   | Potri.018G127300.1 | 0.6237  | 4.9728   | -2.9951 | Down | 7.02E-08  | 1.76E-07  |
| Unigene104001 | Potri.013G085600.2 | 0.3951  | 3.1501   | -2.9951 | Down | 7.02E-08  | 1.76E-07  |
| Unigene102974 | Potri.006G267300.1 | 0.8535  | 6.8048   | -2.9951 | Down | 1.54E-14  | 5.50E-14  |
| Unigene37532  | Potri.002G114800.1 | 0.4472  | 3.5656   | -2.9952 | Down | 7.02E-08  | 1.76E-07  |
| Unigene48903  | Potri.010G164100.3 | 9.2177  | 73.4997  | -2.9953 | Down | 2.63E-226 | 1.58E-224 |
| Unigene43457  | Potri.T093000.1    | 10.0244 | 79.9397  | -2.9954 | Down | 0         | 0         |
| Unigene17335  | Potri.T171900.1    | 8.3143  | 66.3155  | -2.9957 | Down | 3.76E-238 | 2.42E-236 |
| Unigene94807  | Potri.T092000.1    | 6.5658  | 52.3762  | -2.9959 | Down | 3.88E-63  | 4.87E-62  |
| Unigene21626  | Potri.008G039600.6 | 3.4416  | 27.4582  | -2.9961 | Down | 1.80E-98  | 3.78E-97  |
| Unigene96363  | Potri.014G138400.1 | 1.8789  | 14.9945  | -2.9965 | Down | 5.89E-37  | 4.30E-36  |
| Unigene5496   | Potri.011G066500.1 | 1.7995  | 14.3644  | -2.9968 | Down | 2.14E-30  | 1.31E-29  |
| Unigene90384  | Potri.017G112900.1 | 16.447  | 131.3139 | -2.9971 | Down | 1.65E-221 | 9.64E-220 |
| Unigene4244   | Potri.018G118000.3 | 1.0568  | 8.4389   | -2.9974 | Down | 7.95E-24  | 4.01E-23  |
| Unigene1045   | Potri.001G226100.3 | 19.4639 | 155.4372 | -2.9975 | Down | 0         | 0         |
| Unigene95519  | Potri.001G172700.1 | 0.7411  | 5.9213   | -2.9982 | Down | 3.09E-17  | 1.24E-16  |
| Unigene14637  | Potri.001G078100.1 | 1.9047  | 15.2191  | -2.9982 | Down | 3.09E-17  | 1.24E-16  |
| Unigene35787  | Potri.018G057200.1 | 0.6961  | 5.5622   | -2.9983 | Down | 3.09E-17  | 1.24E-16  |
| Unigene48450  | Potri.003G194600.1 | 1.0581  | 8.455    | -2.9983 | Down | 3.09E-17  | 1.24E-16  |
| Unigene34871  | Potri.008G204200.1 | 19.8811 | 158.9289 | -2.9989 | Down | 0         | 0         |
| Unigene516    | Potri.001G107800.2 | 8.9846  | 71.8222  | -2.9989 | Down | 2.00E-304 | 1.80E-302 |
| Unigene79168  | Potri.016G021300.1 | 51.7531 | 413.7402 | -2.999  | Down | 0         | 0         |
| Unigene25976  | Potri.017G002500.1 | 2.0365  | 16.2819  | -2.9991 | Down | 1.65E-26  | 9.05E-26  |
| Unigene51433  | Potri.012G095600.1 | 1.261   | 10.0821  | -2.9992 | Down | 1.65E-26  | 9.05E-26  |
| Unigene45848  | Potri.004G151100.1 | 0.8674  | 6.9353   | -2.9992 | Down | 1.65E-26  | 9.05E-26  |
| Unigene70788  | Potri.001G454500.1 | 14.4745 | 115.7574 | -2.9995 | Down | 4.60E-104 | 1.03E-102 |
| Unigene76424  | Potri.018G143400.1 | 19.3099 | 154.5174 | -3.0004 | Down | 2.43E-155 | 9.11E-154 |
| Unigene97809  | Potri.001G312900.5 | 0.5948  | 4.76     | -3.0005 | Down | 1.31E-10  | 3.88E-10  |
| Unigene106923 | Potri.001G059500.2 | 0.5075  | 4.0615   | -3.0005 | Down | 6.28E-20  | 2.79E-19  |
| Unigene39990  | Potri.005G067800.1 | 0.8505  | 6.8066   | -3.0006 | Down | 1.31E-10  | 3.88E-10  |
| Unigene86588  | Potri.002G213500.2 | 0.8617  | 6.8965   | -3.0006 | Down | 1.31E-10  | 3.88E-10  |
| Unigene117708 | Potri.011G161500.1 | 0.6907  | 5.5281   | -3.0007 | Down | 1.31E-10  | 3.88E-10  |
| Unigene73581  | Potri.012G071600.4 | 8.973   | 71.8405  | -3.0011 | Down | 9.79E-69  | 1.35E-67  |



|               |                    |         |          |         |      |           |           |
|---------------|--------------------|---------|----------|---------|------|-----------|-----------|
| Unigene2341   | Potri.010G169900.2 | 1.109   | 8.8814   | -3.0015 | Down | 4.24E-41  | 3.42E-40  |
| Unigene33884  | Potri.007G063800.1 | 1.4291  | 11.4448  | -3.0015 | Down | 4.24E-41  | 3.42E-40  |
| Unigene44735  | Potri.006G129900.1 | 1.7622  | 14.1123  | -3.0015 | Down | 1.33E-80  | 2.19E-79  |
| Unigene4823   | Potri.003G038500.2 | 59.4175 | 475.8774 | -3.0016 | Down | 0         | 0         |
| Unigene73588  | Potri.014G096100.1 | 16.1866 | 129.6542 | -3.0018 | Down | 1.04E-122 | 2.87E-121 |
| Unigene14938  | Potri.001G408200.8 | 8.4077  | 67.3596  | -3.0021 | Down | 4.54E-74  | 6.79E-73  |
| Unigene46989  | Potri.006G004300.1 | 31.759  | 254.5418 | -3.0027 | Down | 0         | 0         |
| Unigene15493  | Potri.004G191800.1 | 1.6504  | 13.2291  | -3.0028 | Down | 1.52E-34  | 1.04E-33  |
| Unigene21477  | Potri.010G148900.1 | 5.2999  | 42.4836  | -3.0029 | Down | 5.59E-211 | 3.09E-209 |
| Unigene33270  | Potri.013G041200.1 | 3.0485  | 24.4396  | -3.003  | Down | 1.92E-46  | 1.74E-45  |
| Unigene69284  | Potri.001G144700.1 | 0.8586  | 6.886    | -3.0036 | Down | 2.55E-13  | 8.63E-13  |
| Unigene7114   | Potri.017G138000.1 | 0.9403  | 7.5418   | -3.0037 | Down | 2.55E-13  | 8.63E-13  |
| Unigene46491  | Potri.003G092900.1 | 0.4837  | 3.8796   | -3.0037 | Down | 2.55E-13  | 8.63E-13  |
| Unigene85519  | Potri.004G228300.1 | 25.2094 | 202.3117 | -3.0045 | Down | 4.43E-260 | 3.24E-258 |
| Unigene113203 | Potri.016G056600.5 | 2.9721  | 23.855   | -3.0047 | Down | 5.56E-28  | 3.19E-27  |
| Unigene41858  | Potri.016G051900.1 | 2.6643  | 21.3843  | -3.0047 | Down | 5.56E-28  | 3.19E-27  |
| Unigene108275 | Potri.002G134300.3 | 3.6213  | 29.066   | -3.0048 | Down | 5.56E-28  | 3.19E-27  |
| Unigene33630  | Potri.018G006000.3 | 21.2183 | 170.3259 | -3.0049 | Down | 0         | 0         |
| Unigene33912  | Potri.006G276900.2 | 6.7817  | 54.4387  | -3.0049 | Down | 1.18E-162 | 4.72E-161 |
| Unigene32187  | Potri.001G103400.2 | 4.3799  | 35.1621  | -3.0051 | Down | 4.88E-247 | 3.31E-245 |
| Unigene106152 | Potri.015G062900.5 | 0.5887  | 4.7277   | -3.0055 | Down | 5.07E-16  | 1.93E-15  |
| Unigene72625  | Potri.004G096600.1 | 1.9821  | 15.9188  | -3.0056 | Down | 5.07E-16  | 1.93E-15  |
| Unigene48126  | Potri.001G251900.4 | 1.9354  | 15.5433  | -3.0056 | Down | 5.07E-16  | 1.93E-15  |
| Unigene10965  | Potri.001G089700.2 | 5.7919  | 46.5159  | -3.0056 | Down | 0         | 0         |
| Unigene16652  | Potri.001G078300.3 | 0.665   | 5.3407   | -3.0056 | Down | 5.07E-16  | 1.93E-15  |
| Unigene115798 | Potri.017G001300.1 | 1.3722  | 11.0207  | -3.0057 | Down | 5.07E-16  | 1.93E-15  |
| Unigene37894  | Potri.011G052900.1 | 14.1644 | 113.8157 | -3.0064 | Down | 2.96E-160 | 1.16E-158 |
| Unigene16816  | Potri.T092600.1    | 2.2268  | 17.9011  | -3.007  | Down | 1.83E-70  | 2.59E-69  |
| Unigene100221 | Potri.010G182600.1 | 1.7074  | 13.7252  | -3.007  | Down | 1.03E-18  | 4.35E-18  |
| Unigene48954  | Potri.012G007600.1 | 3.6904  | 29.6774  | -3.0075 | Down | 8.49E-76  | 1.31E-74  |
| Unigene7354   | Potri.001G462600.1 | 3.2135  | 25.8422  | -3.0075 | Down | 1.09E-38  | 8.29E-38  |
| Unigene22217  | Potri.011G066700.1 | 1.4569  | 11.718   | -3.0078 | Down | 2.53E-98  | 5.31E-97  |
| Unigene114417 | Potri.015G093600.1 | 2.0799  | 16.7314  | -3.008  | Down | 2.10E-21  | 9.78E-21  |
| Unigene111654 | Potri.015G077600.1 | 2.3808  | 19.1521  | -3.008  | Down | 2.10E-21  | 9.78E-21  |
| Unigene83357  | Potri.012G039200.1 | 10.9541 | 88.1386  | -3.0083 | Down | 2.57E-106 | 5.92E-105 |
| Unigene18880  | Potri.006G125000.1 | 5.8084  | 46.7445  | -3.0086 | Down | 1.21E-111 | 2.97E-110 |
| Unigene4497   | Potri.013G046300.3 | 1.9273  | 15.5122  | -3.0088 | Down | 4.33E-24  | 2.20E-23  |
| Unigene13673  | Potri.009G100200.1 | 4.119   | 33.159   | -3.009  | Down | 4.02E-97  | 8.28E-96  |
| Unigene85312  | Potri.016G121100.1 | 14.296  | 115.0949 | -3.0091 | Down | 1.81E-147 | 6.37E-146 |

|               |                     |         |          |         |      |           |           |
|---------------|---------------------|---------|----------|---------|------|-----------|-----------|
| Unigene45433  | Potri.009G001500.2  | 1.9709  | 15.8724  | -3.0096 | Down | 1.02E-54  | 1.10E-53  |
| Unigene50665  | Potri.018G084400.1  | 4.5771  | 36.8732  | -3.0101 | Down | 1.36E-90  | 2.58E-89  |
| Unigene21305  | Potri.015G058900.1  | 3.7118  | 29.9053  | -3.0102 | Down | 1.08E-245 | 7.30E-244 |
| Unigene115285 | Potri.012G046900.1  | 2.9996  | 24.1673  | -3.0102 | Down | 3.94E-32  | 2.54E-31  |
| Unigene10165  | Potri.019G069300.1  | 1.2081  | 9.7345   | -3.0104 | Down | 2.16E-65  | 2.82E-64  |
| Unigene6292   | Potri.014G001100.4  | 13.5254 | 108.9883 | -3.0104 | Down | 5.36E-259 | 3.88E-257 |
| Unigene34503  | Potri.001G319600.1  | 2.4593  | 19.8276  | -3.0112 | Down | 2.15E-81  | 3.59E-80  |
| Unigene37673  | Potri.013G046300.3  | 3.8441  | 30.9963  | -3.0114 | Down | 1.00E-86  | 1.80E-85  |
| Unigene11271  | Potri.010G076700.5  | 2.4187  | 19.5178  | -3.0125 | Down | 2.42E-137 | 7.74E-136 |
| Unigene2050   | Potri.016G037900.2  | 6.6561  | 53.7254  | -3.0129 | Down | 0         | 0         |
| Unigene44214  | Potri.016G143200.1  | 19.2542 | 155.4386 | -3.0131 | Down | 0         | 0         |
| Unigene256    | Potri.005G177700.1  | 3.2451  | 26.2006  | -3.0133 | Down | 7.78E-115 | 1.98E-113 |
| Unigene112109 | Potri.015G004400.2  | 0.6243  | 5.0442   | -3.0143 | Down | 1.23E-06  | 2.80E-06  |
| Unigene117492 | Potri.013G161500.1  | 0.4088  | 3.3029   | -3.0143 | Down | 1.23E-06  | 2.80E-06  |
| Unigene116696 | Potri.013G034500.1  | 0.4549  | 3.6755   | -3.0143 | Down | 1.23E-06  | 2.80E-06  |
| Unigene104086 | Potri.005G120700.1  | 0.4325  | 3.4944   | -3.0143 | Down | 1.23E-06  | 2.80E-06  |
| Unigene102118 | Potri.005G071500.1  | 0.8575  | 6.9285   | -3.0143 | Down | 2.22E-09  | 6.12E-09  |
| Unigene97046  | Potri.T162100.1     | 1.2433  | 10.0463  | -3.0144 | Down | 8.37E-15  | 3.02E-14  |
| Unigene51876  | Potri.019G070500.1  | 1.3408  | 10.8342  | -3.0144 | Down | 6.34E-31  | 3.95E-30  |
| Unigene96694  | Potri.017G071900.1  | 0.5783  | 4.6727   | -3.0144 | Down | 4.25E-12  | 1.35E-11  |
| Unigene24682  | Potri.016G032000.1  | 1.6159  | 13.0566  | -3.0144 | Down | 1.68E-17  | 6.80E-17  |
| Unigene98970  | Potri.015G093100.7  | 0.9564  | 7.7279   | -3.0144 | Down | 4.25E-12  | 1.35E-11  |
| Unigene104420 | Potri.015G067500.1  | 0.5567  | 4.4983   | -3.0144 | Down | 2.22E-09  | 6.12E-09  |
| Unigene37861  | Potri.015G022100.7  | 2.4661  | 19.9265  | -3.0144 | Down | 1.33E-33  | 8.92E-33  |
| Unigene118236 | Potri.015G019200.10 | 0.5341  | 4.3158   | -3.0144 | Down | 2.22E-09  | 6.12E-09  |
| Unigene115314 | Potri.013G153100.1  | 0.7798  | 6.3008   | -3.0144 | Down | 2.22E-09  | 6.12E-09  |
| Unigene114349 | Potri.013G022200.2  | 0.5567  | 4.4983   | -3.0144 | Down | 1.23E-06  | 2.80E-06  |
| Unigene105299 | Potri.012G054200.2  | 0.5609  | 4.5322   | -3.0144 | Down | 1.23E-06  | 2.80E-06  |
| Unigene22886  | Potri.010G017800.1  | 0.9354  | 7.5583   | -3.0144 | Down | 1.33E-33  | 8.92E-33  |
| Unigene38648  | Potri.009G071600.1  | 4.5303  | 36.606   | -3.0144 | Down | 1.26E-41  | 1.03E-40  |
| Unigene27378  | Potri.008G213200.9  | 1.0581  | 8.55     | -3.0144 | Down | 4.25E-12  | 1.35E-11  |
| Unigene9969   | Potri.008G202500.1  | 3.0185  | 24.3899  | -3.0144 | Down | 1.19E-57  | 1.35E-56  |
| Unigene113523 | Potri.008G072900.1  | 0.5828  | 4.7092   | -3.0144 | Down | 1.23E-06  | 2.80E-06  |
| Unigene30182  | Potri.006G078000.2  | 2.0916  | 16.9003  | -3.0144 | Down | 1.68E-17  | 6.80E-17  |
| Unigene115811 | Potri.006G004000.1  | 0.499   | 4.032    | -3.0144 | Down | 1.23E-06  | 2.80E-06  |
| Unigene37393  | Potri.005G181600.1  | 0.719   | 5.8099   | -3.0144 | Down | 4.25E-12  | 1.35E-11  |
| Unigene116100 | Potri.005G080700.2  | 0.9688  | 7.8283   | -3.0144 | Down | 4.25E-12  | 1.35E-11  |
| Unigene42280  | Potri.005G066600.1  | 0.5445  | 4.3998   | -3.0144 | Down | 1.68E-17  | 6.80E-17  |
| Unigene96234  | Potri.004G077100.2  | 0.5272  | 4.2599   | -3.0144 | Down | 1.23E-06  | 2.79E-06  |

|               |                     |         |          |         |      |           |           |
|---------------|---------------------|---------|----------|---------|------|-----------|-----------|
| Unigene119470 | Potri.004G061900.1  | 1.4109  | 11.4001  | -3.0144 | Down | 2.68E-44  | 2.31E-43  |
| Unigene37469  | Potri.002G136600.1  | 1.5805  | 12.7707  | -3.0144 | Down | 8.37E-15  | 3.02E-14  |
| Unigene118863 | Potri.017G071800.1  | 0.4405  | 3.5597   | -3.0145 | Down | 2.22E-09  | 6.12E-09  |
| Unigene118796 | Potri.003G057900.1  | 0.4539  | 3.668    | -3.0145 | Down | 2.22E-09  | 6.12E-09  |
| Unigene49665  | Potri.003G021100.1  | 0.3855  | 3.1151   | -3.0145 | Down | 1.23E-06  | 2.79E-06  |
| Unigene116773 | Potri.010G003100.1  | 0.4507  | 3.6422   | -3.0146 | Down | 1.23E-06  | 2.80E-06  |
| Unigene11657  | Potri.009G067800.1  | 11.034  | 89.2     | -3.0151 | Down | 0         | 0         |
| Unigene24413  | Potri.001G277300.1  | 2.8743  | 23.2365  | -3.0151 | Down | 2.41E-176 | 1.07E-174 |
| Unigene51299  | Potri.014G148900.2  | 6.0161  | 48.661   | -3.0159 | Down | 1.88E-88  | 3.44E-87  |
| Unigene31446  | Potri.015G119500.1  | 3.9867  | 32.2501  | -3.016  | Down | 1.87E-80  | 3.08E-79  |
| Unigene65140  | Potri.006G051100.1  | 5.7012  | 46.1193  | -3.016  | Down | 1.87E-80  | 3.08E-79  |
| Unigene52945  | Potri.015G039900.1  | 18.6498 | 150.9589 | -3.0169 | Down | 0         | 0         |
| Unigene100328 | Potri.008G050400.1  | 1.17    | 9.4733   | -3.0174 | Down | 9.12E-46  | 8.15E-45  |
| Unigene44045  | Potri.001G247400.3  | 4.0737  | 32.9848  | -3.0174 | Down | 2.98E-87  | 5.39E-86  |
| Unigene23520  | Potri.001G204200.1  | 9.3044  | 75.3362  | -3.0174 | Down | 6.00E-305 | 5.42E-303 |
| Unigene60431  | Potri.005G178300.3  | 4.0513  | 32.8104  | -3.0177 | Down | 2.02E-40  | 1.60E-39  |
| Unigene3273   | Potri.T092300.1     | 6.9688  | 56.4881  | -3.019  | Down | 2.93E-142 | 9.77E-141 |
| Unigene53600  | Potri.004G038300.2  | 3.1923  | 25.8851  | -3.0195 | Down | 4.90E-27  | 2.73E-26  |
| Unigene4895   | Potri.015G095500.1  | 3.444   | 27.9336  | -3.0198 | Down | 1.02E-72  | 1.49E-71  |
| Unigene30697  | Potri.018G143400.1  | 5.9216  | 48.0316  | -3.0199 | Down | 2.73E-118 | 7.24E-117 |
| Unigene103786 | Potri.001G360500.1  | 0.6354  | 5.154    | -3.02   | Down | 2.36E-24  | 1.21E-23  |
| Unigene52022  | Potri.002G176300.1  | 12.6869 | 102.9233 | -3.0202 | Down | 9.84E-136 | 3.09E-134 |
| Unigene34403  | Potri.016G037900.1  | 5.0252  | 40.7952  | -3.0211 | Down | 5.64E-97  | 1.16E-95  |
| Unigene34335  | Potri.012G033500.3  | 3.9176  | 31.8034  | -3.0211 | Down | 5.64E-97  | 1.16E-95  |
| Unigene23813  | Potri.009G098500.1  | 3.9534  | 32.0988  | -3.0214 | Down | 2.61E-94  | 5.17E-93  |
| Unigene118792 | Potri.008G197200.1  | 0.9856  | 8.0044   | -3.0217 | Down | 5.58E-19  | 2.39E-18  |
| Unigene48840  | Potri.016G060600.1  | 7.9346  | 64.4425  | -3.0218 | Down | 0         | 0         |
| Unigene46792  | Potri.014G157500.1  | 11.3764 | 92.426   | -3.0223 | Down | 1.20E-83  | 2.06E-82  |
| Unigene75704  | Potri.014G086300.6  | 20.498  | 166.5333 | -3.0223 | Down | 1.50E-165 | 6.15E-164 |
| Unigene65116  | Potri.007G032500.10 | 6.9285  | 56.293   | -3.0223 | Down | 2.53E-180 | 1.16E-178 |
| Unigene44313  | Potri.010G163800.1  | 1.1904  | 9.6722   | -3.0224 | Down | 7.26E-34  | 4.89E-33  |
| Unigene98627  | Potri.002G085900.1  | 1.7956  | 14.5968  | -3.0231 | Down | 3.45E-31  | 2.17E-30  |
| Unigene34893  | Potri.T045700.1     | 7.9406  | 64.5553  | -3.0232 | Down | 0         | 0         |
| Unigene2991   | Potri.009G110400.1  | 2.2508  | 18.3027  | -3.0235 | Down | 3.53E-58  | 4.06E-57  |
| Unigene92363  | Potri.004G228300.1  | 54.6427 | 444.4262 | -3.0238 | Down | 0         | 0         |
| Unigene29342  | Potri.014G077500.1  | 2.0354  | 16.5565  | -3.024  | Down | 1.65E-55  | 1.80E-54  |
| Unigene44437  | Potri.015G070000.2  | 19.3753 | 157.7062 | -3.0249 | Down | 2.00E-307 | 1.82E-305 |
| Unigene116132 | Potri.008G187300.1  | 1.0864  | 8.8433   | -3.025  | Down | 1.39E-13  | 4.75E-13  |
| Unigene104022 | Potri.017G053200.1  | 0.7142  | 5.814    | -3.0251 | Down | 1.39E-13  | 4.75E-13  |

|               |                    |         |          |         |      |           |           |
|---------------|--------------------|---------|----------|---------|------|-----------|-----------|
| Unigene116511 | Potri.011G161900.1 | 1.0425  | 8.4863   | -3.0251 | Down | 1.39E-13  | 4.75E-13  |
| Unigene34481  | Potri.005G014700.1 | 1.2878  | 10.4831  | -3.0251 | Down | 5.19E-38  | 3.88E-37  |
| Unigene43107  | Potri.006G150900.1 | 2.6357  | 21.4694  | -3.026  | Down | 1.04E-90  | 1.97E-89  |
| Unigene33872  | Potri.015G070000.2 | 1.9376  | 15.787   | -3.0264 | Down | 7.95E-45  | 6.94E-44  |
| Unigene1171   | Potri.006G068500.9 | 6.2649  | 51.0703  | -3.0271 | Down | 3.88E-235 | 2.45E-233 |
| Unigene27221  | Potri.003G086000.1 | 11.6764 | 95.2215  | -3.0277 | Down | 5.74E-99  | 1.22E-97  |
| Unigene117904 | Potri.014G111200.2 | 0.6661  | 5.4332   | -3.028  | Down | 7.12E-11  | 2.14E-10  |
| Unigene119089 | Potri.010G031300.1 | 0.4565  | 3.7235   | -3.028  | Down | 7.12E-11  | 2.14E-10  |
| Unigene52010  | Potri.001G352700.1 | 2.0293  | 16.553   | -3.028  | Down | 5.56E-30  | 3.37E-29  |
| Unigene116732 | Potri.015G140400.1 | 0.7912  | 6.454    | -3.0281 | Down | 7.12E-11  | 2.14E-10  |
| Unigene64654  | Potri.011G026900.2 | 0.6368  | 5.1947   | -3.0281 | Down | 7.12E-11  | 2.14E-10  |
| Unigene40646  | Potri.009G117300.2 | 3.9137  | 31.9244  | -3.0281 | Down | 6.51E-68  | 8.85E-67  |
| Unigene108458 | Potri.001G421300.1 | 6.3067  | 51.4448  | -3.0281 | Down | 5.76E-49  | 5.51E-48  |
| Unigene119041 | Potri.017G055100.2 | 0.4704  | 3.8375   | -3.0282 | Down | 7.12E-11  | 2.14E-10  |
| Unigene101339 | Potri.005G058100.1 | 0.61    | 4.9762   | -3.0282 | Down | 7.12E-11  | 2.14E-10  |
| Unigene43481  | Potri.005G044100.1 | 3.4112  | 27.8344  | -3.0285 | Down | 3.55E-84  | 6.16E-83  |
| Unigene1668   | Potri.009G053300.8 | 2.8053  | 22.891   | -3.0286 | Down | 1.03E-74  | 1.56E-73  |
| Unigene19561  | Potri.014G087200.3 | 1.5872  | 12.9676  | -3.0304 | Down | 9.13E-18  | 3.74E-17  |
| Unigene43299  | Potri.015G012300.1 | 8.7099  | 71.1759  | -3.0307 | Down | 0         | 0         |
| Unigene23518  | Potri.014G152200.1 | 2.6186  | 21.4     | -3.0307 | Down | 3.07E-57  | 3.46E-56  |
| Unigene28999  | Potri.T106900.2    | 3.1659  | 25.8754  | -3.0309 | Down | 1.31E-119 | 3.52E-118 |
| Unigene4291   | Potri.016G003800.2 | 0.9339  | 7.6346   | -3.0312 | Down | 1.28E-24  | 6.62E-24  |
| Unigene32011  | Potri.013G098900.1 | 5.9544  | 48.6822  | -3.0314 | Down | 0         | 0         |
| Unigene33501  | Potri.008G118000.1 | 2.1941  | 17.9409  | -3.0316 | Down | 1.43E-54  | 1.53E-53  |
| Unigene14105  | Potri.019G119200.1 | 4.0029  | 32.7362  | -3.0318 | Down | 1.88E-31  | 1.19E-30  |
| Unigene103802 | Potri.011G151400.1 | 1.313   | 10.7405  | -3.0321 | Down | 2.83E-38  | 2.13E-37  |
| Unigene68     | Potri.007G112600.1 | 9.2271  | 75.4842  | -3.0322 | Down | 0         | 0         |
| Unigene14824  | Potri.014G043900.1 | 3.0973  | 25.3465  | -3.0327 | Down | 1.65E-65  | 2.16E-64  |
| Unigene1041   | Potri.009G004800.1 | 3.7691  | 30.8508  | -3.033  | Down | 2.74E-106 | 6.31E-105 |
| Unigene72029  | Potri.014G096100.1 | 17.6491 | 144.4707 | -3.0331 | Down | 1.88E-133 | 5.78E-132 |
| Unigene101747 | Potri.018G139000.1 | 0.5096  | 4.1722   | -3.0334 | Down | 3.80E-08  | 9.71E-08  |
| Unigene58619  | Potri.018G064800.2 | 0.6933  | 5.6767   | -3.0335 | Down | 3.80E-08  | 9.71E-08  |
| Unigene103179 | Potri.017G141000.2 | 0.5152  | 4.2183   | -3.0335 | Down | 3.80E-08  | 9.71E-08  |
| Unigene12696  | Potri.016G113600.5 | 7.7819  | 63.7181  | -3.0335 | Down | 1.14E-198 | 5.91E-197 |
| Unigene100567 | Potri.011G135400.1 | 1.3944  | 11.4171  | -3.0335 | Down | 8.97E-29  | 5.26E-28  |
| Unigene99598  | Potri.002G076000.1 | 0.7011  | 5.7407   | -3.0335 | Down | 3.80E-08  | 9.71E-08  |
| Unigene26891  | Potri.002G054100.3 | 4.6479  | 38.057   | -3.0335 | Down | 4.89E-56  | 5.40E-55  |
| Unigene36426  | Potri.003G149100.1 | 0.518   | 4.2418   | -3.0337 | Down | 3.80E-08  | 9.71E-08  |
| Unigene32087  | Potri.011G031500.1 | 6.0176  | 49.2918  | -3.0341 | Down | 0         | 0         |

|               |                    |         |          |         |      |           |           |
|---------------|--------------------|---------|----------|---------|------|-----------|-----------|
| Unigene18082  | Potri.014G059600.1 | 2.4492  | 20.0651  | -3.0343 | Down | 5.64E-67  | 7.56E-66  |
| Unigene36872  | Potri.014G073500.1 | 5.7118  | 46.805   | -3.0346 | Down | 1.68E-91  | 3.21E-90  |
| Unigene98465  | Potri.015G037400.1 | 1.0635  | 8.7163   | -3.0349 | Down | 9.59E-40  | 7.47E-39  |
| Unigene42734  | Potri.012G051800.1 | 7.278   | 59.6541  | -3.035  | Down | 4.15E-241 | 2.72E-239 |
| Unigene11744  | Potri.009G093600.1 | 2.0455  | 16.7654  | -3.035  | Down | 4.15E-71  | 5.93E-70  |
| Unigene66496  | Potri.016G021700.1 | 3.8819  | 31.8209  | -3.0351 | Down | 6.35E-33  | 4.18E-32  |
| Unigene49099  | Potri.002G152200.1 | 1.0449  | 8.5657   | -3.0352 | Down | 6.35E-33  | 4.18E-32  |
| Unigene28355  | Potri.001G161400.2 | 12.6428 | 103.648  | -3.0353 | Down | 0         | 0         |
| Unigene56971  | Potri.005G018700.1 | 15.8453 | 129.9221 | -3.0355 | Down | 1.51E-155 | 5.67E-154 |
| Unigene33966  | Potri.008G036300.3 | 2.4959  | 20.4661  | -3.0356 | Down | 1.07E-50  | 1.06E-49  |
| Unigene27475  | Potri.004G001900.2 | 5.1448  | 42.2008  | -3.0361 | Down | 1.22E-61  | 1.49E-60  |
| Unigene79280  | Potri.001G398700.1 | 10.8339 | 88.8743  | -3.0362 | Down | 4.28E-97  | 8.83E-96  |
| Unigene47372  | Potri.008G009300.1 | 0.6397  | 5.2485   | -3.0364 | Down | 3.03E-19  | 1.31E-18  |
| Unigene19356  | Potri.002G007800.2 | 2.0374  | 16.7157  | -3.0364 | Down | 3.03E-19  | 1.31E-18  |
| Unigene49410  | Potri.013G113500.1 | 1.1409  | 9.3608   | -3.0365 | Down | 3.03E-19  | 1.31E-18  |
| Unigene24133  | Potri.014G147300.2 | 4.9402  | 40.536   | -3.0366 | Down | 0         | 0         |
| Unigene8232   | Potri.010G052200.1 | 8.2732  | 67.907   | -3.037  | Down | 1.34E-162 | 5.34E-161 |
| Unigene3562   | Potri.014G072300.1 | 26.434  | 217.0001 | -3.0372 | Down | 6.08E-224 | 3.61E-222 |
| Unigene12239  | Potri.002G230000.1 | 6.7304  | 55.2488  | -3.0372 | Down | 4.94E-213 | 2.75E-211 |
| Unigene18402  | Potri.004G038300.2 | 4.9522  | 40.6771  | -3.0381 | Down | 3.88E-194 | 1.95E-192 |
| Unigene97877  | Potri.019G131800.1 | 0.609   | 5.0026   | -3.0382 | Down | 2.30E-12  | 7.44E-12  |
| Unigene103912 | Potri.001G215000.1 | 0.9947  | 8.171    | -3.0382 | Down | 2.30E-12  | 7.44E-12  |
| Unigene36346  | Potri.001G083900.1 | 16.4842 | 135.4597 | -3.0387 | Down | 0         | 0         |
| Unigene4324   | Potri.008G039000.1 | 3.7127  | 30.511   | -3.0388 | Down | 1.95E-60  | 2.33E-59  |
| Unigene7162   | Potri.002G055400.5 | 1.792   | 14.7298  | -3.0391 | Down | 1.54E-38  | 1.16E-37  |
| Unigene89367  | Potri.017G114600.5 | 11.4849 | 94.4466  | -3.0398 | Down | 9.45E-151 | 3.41E-149 |
| Unigene43722  | Potri.014G147300.1 | 8.2231  | 67.6316  | -3.0399 | Down | 6.71E-211 | 3.71E-209 |
| Unigene9469   | Potri.004G072200.1 | 5.8894  | 48.453   | -3.0404 | Down | 4.98E-92  | 9.59E-91  |
| Unigene32454  | Potri.016G023300.1 | 2.5263  | 20.7864  | -3.0405 | Down | 2.67E-141 | 8.84E-140 |
| Unigene78813  | Potri.019G031400.1 | 12.9534 | 106.6001 | -3.0408 | Down | 2.45E-115 | 6.29E-114 |
| Unigene41660  | Potri.008G204100.1 | 5.4894  | 45.1894  | -3.0413 | Down | 4.24E-55  | 4.59E-54  |
| Unigene33111  | Potri.T174800.1    | 0.8851  | 7.2878   | -3.0416 | Down | 1.01E-20  | 4.60E-20  |
| Unigene35659  | Potri.018G097900.1 | 1.03    | 8.4809   | -3.0416 | Down | 1.01E-20  | 4.60E-20  |
| Unigene33440  | Potri.002G176400.1 | 3.2102  | 26.4333  | -3.0416 | Down | 3.10E-59  | 3.64E-58  |
| Unigene4032   | Potri.001G211000.6 | 1.0701  | 8.8111   | -3.0416 | Down | 1.01E-20  | 4.60E-20  |
| Unigene93946  | Potri.016G133500.1 | 21.8709 | 180.1044 | -3.0417 | Down | 0         | 0         |
| Unigene7427   | Potri.010G252000.2 | 2.0108  | 16.5723  | -3.0429 | Down | 4.87E-29  | 2.88E-28  |
| Unigene75028  | Potri.001G449500.1 | 39.1816 | 322.9563 | -3.0431 | Down | 0         | 0         |
| Unigene43618  | Potri.006G207400.1 | 1.0837  | 8.9331   | -3.0432 | Down | 1.06E-60  | 1.27E-59  |

|               |                    |         |         |         |      |           |           |
|---------------|--------------------|---------|---------|---------|------|-----------|-----------|
| Unigene16912  | Potri.008G186500.7 | 10.2435 | 84.4489 | -3.0434 | Down | 5.53E-128 | 1.61E-126 |
| Unigene89501  | Potri.003G139600.1 | 39.0757 | 322.157 | -3.0434 | Down | 0         | 0         |
| Unigene84044  | Potri.019G041900.1 | 9.7657  | 80.5165 | -3.0435 | Down | 1.49E-100 | 3.22E-99  |
| Unigene103458 | Potri.006G110000.1 | 1.3413  | 11.0607 | -3.0437 | Down | 2.46E-37  | 1.81E-36  |
| Unigene6684   | Potri.014G086200.1 | 9.2441  | 76.2614 | -3.0443 | Down | 4.04E-198 | 2.08E-196 |
| Unigene8091   | Potri.008G135600.6 | 2.3437  | 19.3405 | -3.0448 | Down | 2.65E-66  | 3.52E-65  |
| Unigene98160  | Potri.015G120400.3 | 0.416   | 3.4359  | -3.046  | Down | 1.20E-09  | 3.36E-09  |
| Unigene119020 | Potri.004G139900.2 | 0.6115  | 5.0506  | -3.046  | Down | 7.51E-14  | 2.60E-13  |
| Unigene54846  | Potri.001G387500.3 | 0.5859  | 4.8391  | -3.046  | Down | 1.20E-09  | 3.36E-09  |
| Unigene105296 | Potri.019G029600.3 | 0.634   | 5.2366  | -3.0461 | Down | 4.95E-18  | 2.05E-17  |
| Unigene25398  | Potri.016G040800.1 | 0.7082  | 5.8497  | -3.0461 | Down | 4.95E-18  | 2.05E-17  |
| Unigene52967  | Potri.016G022500.1 | 5.5395  | 45.7554 | -3.0461 | Down | 6.01E-43  | 5.05E-42  |
| Unigene45740  | Potri.015G116700.2 | 2.1247  | 17.5492 | -3.0461 | Down | 8.35E-39  | 6.36E-38  |
| Unigene114845 | Potri.014G152200.1 | 1.2119  | 10.01   | -3.0461 | Down | 7.51E-14  | 2.60E-13  |
| Unigene68206  | Potri.008G182500.1 | 1.0864  | 8.9734  | -3.0461 | Down | 2.34E-26  | 1.27E-25  |
| Unigene106662 | Potri.008G155900.1 | 1.1717  | 9.6781  | -3.0461 | Down | 4.95E-18  | 2.05E-17  |
| Unigene16883  | Potri.008G106700.1 | 0.9523  | 7.866   | -3.0461 | Down | 1.20E-09  | 3.36E-09  |
| Unigene96107  | Potri.008G020000.4 | 0.4476  | 3.697   | -3.0461 | Down | 2.19E-05  | 4.48E-05  |
| Unigene118866 | Potri.006G189000.1 | 0.4397  | 3.6317  | -3.0461 | Down | 1.20E-09  | 3.36E-09  |
| Unigene104660 | Potri.004G141900.1 | 0.7097  | 5.8621  | -3.0461 | Down | 7.51E-14  | 2.60E-13  |
| Unigene35218  | Potri.004G012900.1 | 2.0392  | 16.843  | -3.0461 | Down | 1.17E-34  | 8.01E-34  |
| Unigene114663 | Potri.002G188000.1 | 0.4084  | 3.3732  | -3.0461 | Down | 2.19E-05  | 4.48E-05  |
| Unigene114293 | Potri.002G080900.1 | 0.4191  | 3.4616  | -3.0461 | Down | 2.19E-05  | 4.48E-05  |
| Unigene95054  | Potri.001G178100.4 | 1.1758  | 9.712   | -3.0461 | Down | 3.16E-51  | 3.16E-50  |
| Unigene117247 | Potri.001G114100.1 | 0.6358  | 5.2515  | -3.0461 | Down | 1.20E-09  | 3.36E-09  |
| Unigene115549 | Potri.019G095700.3 | 0.3832  | 3.1653  | -3.0462 | Down | 2.19E-05  | 4.48E-05  |
| Unigene109282 | Potri.017G007200.1 | 0.5253  | 4.3392  | -3.0462 | Down | 2.19E-05  | 4.48E-05  |
| Unigene110734 | Potri.013G020700.1 | 0.4951  | 4.0896  | -3.0462 | Down | 2.19E-05  | 4.48E-05  |
| Unigene113911 | Potri.012G049800.1 | 0.4287  | 3.5412  | -3.0462 | Down | 2.19E-05  | 4.48E-05  |
| Unigene109598 | Potri.010G019400.1 | 0.518   | 4.279   | -3.0462 | Down | 2.19E-05  | 4.48E-05  |
| Unigene118535 | Potri.009G153300.1 | 0.4951  | 4.0896  | -3.0462 | Down | 1.20E-09  | 3.36E-09  |
| Unigene119119 | Potri.001G027000.1 | 0.3832  | 3.1653  | -3.0462 | Down | 1.20E-09  | 3.36E-09  |
| Unigene52754  | Potri.002G040600.4 | 6.9644  | 57.5723 | -3.0473 | Down | 5.09E-145 | 1.74E-143 |
| Unigene22695  | Potri.019G065800.1 | 1.3551  | 11.2051 | -3.0477 | Down | 7.86E-57  | 8.82E-56  |
| Unigene46927  | Potri.001G400000.1 | 10.42   | 86.1622 | -3.0477 | Down | 4.51E-218 | 2.60E-216 |
| Unigene43995  | Potri.017G155200.2 | 2.5605  | 21.1737 | -3.0478 | Down | 1.08E-52  | 1.11E-51  |
| Unigene51502  | Potri.018G130800.1 | 8.5084  | 70.3704 | -3.048  | Down | 3.13E-138 | 1.01E-136 |
| Unigene40586  | Potri.009G077900.1 | 11.964  | 98.9466 | -3.048  | Down | 4.96E-236 | 3.16E-234 |
| Unigene11945  | Potri.012G011500.1 | 2.2085  | 18.2713 | -3.0484 | Down | 1.82E-113 | 4.56E-112 |

|               |                    |         |          |         |      |           |           |
|---------------|--------------------|---------|----------|---------|------|-----------|-----------|
| Unigene119521 | Potri.009G152500.1 | 0.9124  | 7.5495   | -3.0486 | Down | 3.95E-36  | 2.82E-35  |
| Unigene48664  | Potri.002G159800.1 | 2.9603  | 24.4938  | -3.0486 | Down | 3.95E-36  | 2.82E-35  |
| Unigene2382   | Potri.018G094500.1 | 1.5483  | 12.8138  | -3.0489 | Down | 5.55E-32  | 3.56E-31  |
| Unigene17380  | Potri.015G070000.2 | 3.0662  | 25.3744  | -3.0489 | Down | 2.59E-127 | 7.48E-126 |
| Unigene13849  | Potri.018G085400.1 | 1.7647  | 14.6049  | -3.049  | Down | 5.55E-32  | 3.56E-31  |
| Unigene43553  | Potri.004G057500.1 | 2.5965  | 21.4913  | -3.0491 | Down | 1.08E-88  | 1.99E-87  |
| Unigene93234  | Potri.014G157500.1 | 41.4439 | 343.2212 | -3.0499 | Down | 0         | 0         |
| Unigene44724  | Potri.005G069100.1 | 4.7326  | 39.2346  | -3.0514 | Down | 2.32E-83  | 3.98E-82  |
| Unigene102888 | Potri.017G036400.2 | 0.7787  | 6.4598   | -3.0523 | Down | 2.46E-15  | 9.10E-15  |
| Unigene9081   | Potri.012G035700.1 | 0.6065  | 5.0313   | -3.0524 | Down | 2.46E-15  | 9.10E-15  |
| Unigene29429  | Potri.001G406000.1 | 0.9315  | 7.7296   | -3.0528 | Down | 7.84E-67  | 1.05E-65  |
| Unigene12854  | Potri.001G222500.2 | 3.5557  | 29.5192  | -3.0534 | Down | 1.97E-72  | 2.88E-71  |
| Unigene81756  | Potri.009G134000.2 | 13.4045 | 111.2942 | -3.0536 | Down | 2.63E-129 | 7.75E-128 |
| Unigene1521   | Potri.015G059800.5 | 3.3037  | 27.4408  | -3.0542 | Down | 1.11E-44  | 9.67E-44  |
| Unigene34652  | Potri.018G097900.1 | 1.0571  | 8.7854   | -3.055  | Down | 8.92E-31  | 5.54E-30  |
| Unigene19615  | Potri.017G101100.2 | 0.5664  | 4.7072   | -3.055  | Down | 5.48E-21  | 2.52E-20  |
| Unigene11263  | Potri.013G148100.1 | 2.0293  | 16.8653  | -3.055  | Down | 4.98E-60  | 5.92E-59  |
| Unigene101686 | Potri.013G026400.4 | 0.7213  | 5.9945   | -3.055  | Down | 3.85E-11  | 1.17E-10  |
| Unigene108521 | Potri.005G251300.4 | 1.2553  | 10.4327  | -3.055  | Down | 3.85E-11  | 1.17E-10  |
| Unigene20218  | Potri.002G118900.1 | 0.7841  | 6.5165   | -3.055  | Down | 3.85E-11  | 1.17E-10  |
| Unigene118672 | Potri.004G124800.3 | 0.5555  | 4.617    | -3.0551 | Down | 3.85E-11  | 1.17E-10  |
| Unigene48013  | Potri.004G099500.3 | 0.7153  | 5.9452   | -3.0551 | Down | 3.85E-11  | 1.17E-10  |
| Unigene69     | Potri.009G168300.1 | 2.8823  | 23.9575  | -3.0552 | Down | 5.78E-260 | 4.21E-258 |
| Unigene16080  | Potri.004G121800.1 | 12.7936 | 106.384  | -3.0558 | Down | 2.07E-100 | 4.45E-99  |
| Unigene26844  | Potri.018G024600.2 | 3.5456  | 29.4895  | -3.0561 | Down | 2.15E-36  | 1.54E-35  |
| Unigene11100  | Potri.007G011000.2 | 32.208  | 267.9676 | -3.0566 | Down | 0         | 0         |
| Unigene20485  | Potri.008G097700.1 | 0.8141  | 6.7773   | -3.0574 | Down | 8.12E-17  | 3.20E-16  |
| Unigene112679 | Potri.008G056800.1 | 1.6747  | 13.9418  | -3.0574 | Down | 8.12E-17  | 3.20E-16  |
| Unigene103738 | Potri.001G144400.4 | 1.4575  | 12.1341  | -3.0575 | Down | 3.01E-32  | 1.95E-31  |
| Unigene12485  | Potri.011G142000.1 | 2.4559  | 20.4509  | -3.0578 | Down | 1.46E-68  | 2.00E-67  |
| Unigene91198  | Potri.016G125400.1 | 20.0144 | 166.7196 | -3.0583 | Down | 4.00E-308 | 3.66E-306 |
| Unigene27453  | Potri.008G086300.4 | 4.512   | 37.5926  | -3.0586 | Down | 1.98E-64  | 2.55E-63  |
| Unigene109451 | Potri.003G055600.1 | 2.6023  | 21.6813  | -3.0586 | Down | 1.83E-22  | 8.82E-22  |
| Unigene2308   | Potri.010G052900.1 | 2.9221  | 24.3519  | -3.059  | Down | 1.51E-96  | 3.09E-95  |
| Unigene42519  | Potri.017G112300.1 | 7.2429  | 60.3668  | -3.0591 | Down | 0         | 0         |
| Unigene73620  | Potri.018G086800.2 | 3.3429  | 27.8643  | -3.0592 | Down | 4.27E-28  | 2.45E-27  |
| Unigene4410   | Potri.008G134500.1 | 3.2962  | 27.4755  | -3.0593 | Down | 4.27E-28  | 2.45E-27  |
| Unigene104836 | Potri.016G080400.1 | 0.3749  | 3.13     | -3.0616 | Down | 6.61E-07  | 1.54E-06  |
| Unigene117131 | Potri.015G024500.1 | 0.43    | 3.59     | -3.0616 | Down | 6.61E-07  | 1.54E-06  |

|               |                    |         |          |         |      |           |           |
|---------------|--------------------|---------|----------|---------|------|-----------|-----------|
| Unigene119501 | Potri.013G070200.1 | 0.6356  | 5.3067   | -3.0616 | Down | 6.12E-24  | 3.10E-23  |
| Unigene116181 | Potri.006G176700.1 | 0.4813  | 4.0185   | -3.0616 | Down | 6.61E-07  | 1.54E-06  |
| Unigene104509 | Potri.005G233900.1 | 0.6217  | 5.1906   | -3.0616 | Down | 6.61E-07  | 1.54E-06  |
| Unigene113918 | Potri.005G232900.5 | 0.5695  | 4.7547   | -3.0616 | Down | 6.61E-07  | 1.54E-06  |
| Unigene108611 | Potri.018G124000.1 | 0.7173  | 5.9891   | -3.0617 | Down | 6.61E-07  | 1.54E-06  |
| Unigene9680   | Potri.018G023500.1 | 0.8131  | 6.7888   | -3.0617 | Down | 1.25E-12  | 4.08E-12  |
| Unigene109826 | Potri.017G000100.1 | 1.3688  | 11.4288  | -3.0617 | Down | 1.25E-12  | 4.08E-12  |
| Unigene45732  | Potri.016G048300.1 | 0.9267  | 7.7375   | -3.0617 | Down | 1.25E-12  | 4.08E-12  |
| Unigene30378  | Potri.016G009500.1 | 0.5319  | 4.4411   | -3.0617 | Down | 1.25E-12  | 4.08E-12  |
| Unigene54350  | Potri.014G068500.2 | 2.5613  | 21.3861  | -3.0617 | Down | 6.12E-24  | 3.10E-23  |
| Unigene4388   | Potri.014G049100.1 | 1.471   | 12.282   | -3.0617 | Down | 8.36E-41  | 6.68E-40  |
| Unigene25890  | Potri.010G063500.1 | 3.5645  | 29.7617  | -3.0617 | Down | 8.36E-41  | 6.68E-40  |
| Unigene104908 | Potri.009G084900.1 | 0.3693  | 3.0835   | -3.0617 | Down | 6.61E-07  | 1.54E-06  |
| Unigene100732 | Potri.006G007200.1 | 1.1031  | 9.2107   | -3.0617 | Down | 6.12E-24  | 3.10E-23  |
| Unigene118136 | Potri.002G098100.2 | 0.3639  | 3.0384   | -3.0617 | Down | 6.61E-07  | 1.54E-06  |
| Unigene25569  | Potri.002G006100.1 | 1.1794  | 9.8478   | -3.0617 | Down | 1.25E-12  | 4.08E-12  |
| Unigene111623 | Potri.001G392800.1 | 0.6376  | 5.3237   | -3.0617 | Down | 6.61E-07  | 1.54E-06  |
| Unigene46579  | Potri.016G137300.3 | 0.6875  | 5.7407   | -3.0618 | Down | 6.61E-07  | 1.54E-06  |
| Unigene118374 | Potri.010G189100.1 | 0.6875  | 5.7407   | -3.0618 | Down | 1.25E-12  | 4.08E-12  |
| Unigene114571 | Potri.008G200300.2 | 0.5485  | 4.5799   | -3.0618 | Down | 6.61E-07  | 1.54E-06  |
| Unigene117994 | Potri.005G188700.1 | 0.7497  | 6.26     | -3.0618 | Down | 1.25E-12  | 4.08E-12  |
| Unigene96372  | Potri.002G019800.3 | 0.9533  | 7.96     | -3.0618 | Down | 6.12E-24  | 3.10E-23  |
| Unigene85933  | Potri.016G037600.1 | 21.874  | 182.6724 | -3.062  | Down | 1.35E-243 | 9.02E-242 |
| Unigene46535  | Potri.005G255500.1 | 18.4636 | 154.324  | -3.0632 | Down | 0         | 0         |
| Unigene38420  | Potri.019G067800.1 | 10.6287 | 88.9053  | -3.0643 | Down | 2.30E-227 | 1.39E-225 |
| Unigene92083  | Potri.001G226100.3 | 29.1838 | 244.1141 | -3.0643 | Down | 0         | 0         |
| Unigene107063 | Potri.010G133900.1 | 0.9219  | 7.7162   | -3.0652 | Down | 8.92E-20  | 3.94E-19  |
| Unigene108642 | Potri.018G130800.1 | 1.6062  | 13.4592  | -3.0669 | Down | 4.07E-14  | 1.43E-13  |
| Unigene50765  | Potri.018G057000.1 | 1.366   | 11.4464  | -3.0669 | Down | 2.75E-52  | 2.82E-51  |
| Unigene19396  | Potri.017G050400.1 | 2.4866  | 20.8368  | -3.0669 | Down | 6.88E-27  | 3.81E-26  |
| Unigene43965  | Potri.008G204200.1 | 8.5437  | 71.5919  | -3.0669 | Down | 2.00E-305 | 1.81E-303 |
| Unigene51360  | Potri.008G051300.1 | 2.2085  | 18.5063  | -3.0669 | Down | 6.88E-27  | 3.81E-26  |
| Unigene119570 | Potri.006G136900.1 | 0.4978  | 4.1715   | -3.0669 | Down | 1.34E-39  | 1.04E-38  |
| Unigene118332 | Potri.004G174700.1 | 0.7825  | 6.557    | -3.0669 | Down | 4.07E-14  | 1.43E-13  |
| Unigene1869   | Potri.008G108000.1 | 2.0908  | 17.5247  | -3.0673 | Down | 5.02E-72  | 7.28E-71  |
| Unigene2136   | Potri.008G045300.1 | 8.1408  | 68.2511  | -3.0676 | Down | 1.89E-156 | 7.17E-155 |
| Unigene103380 | Potri.011G093100.1 | 0.7924  | 6.6467   | -3.0683 | Down | 2.97E-21  | 1.38E-20  |
| Unigene26897  | Potri.006G111700.2 | 0.8603  | 7.2161   | -3.0683 | Down | 2.97E-21  | 1.38E-20  |
| Unigene48917  | Potri.006G051100.1 | 19.8189 | 166.3188 | -3.069  | Down | 0         | 0         |



|               |                     |          |          |         |      |           |           |
|---------------|---------------------|----------|----------|---------|------|-----------|-----------|
| Unigene43319  | Potri.002G013700.1  | 5.0217   | 42.1407  | -3.069  | Down | 1.78E-235 | 1.13E-233 |
| Unigene88602  | Potri.002G011800.1  | 6.3276   | 53.1019  | -3.069  | Down | 5.08E-82  | 8.55E-81  |
| Unigene78180  | Potri.016G022100.1  | 3.8093   | 31.9772  | -3.0694 | Down | 1.87E-35  | 1.31E-34  |
| Unigene29170  | Potri.004G026000.1  | 1.9893   | 16.6992  | -3.0694 | Down | 1.87E-35  | 1.31E-34  |
| Unigene92720  | Potri.010G167200.2  | 104.5586 | 877.7805 | -3.0695 | Down | 0         | 0         |
| Unigene38557  | Potri.016G065900.10 | 2.3984   | 20.1372  | -3.0697 | Down | 1.54E-42  | 1.28E-41  |
| Unigene92674  | Potri.001G379000.1  | 117.8515 | 989.7738 | -3.0701 | Down | 0         | 0         |
| Unigene50825  | Potri.001G149400.2  | 7.0412   | 59.1502  | -3.0705 | Down | 3.95E-106 | 9.06E-105 |
| Unigene115981 | Potri.018G067500.1  | 0.6135   | 5.1553   | -3.0709 | Down | 2.05E-08  | 5.33E-08  |
| Unigene117818 | Potri.017G149700.1  | 0.4832   | 4.0602   | -3.0709 | Down | 2.05E-08  | 5.33E-08  |
| Unigene106591 | Potri.015G102700.1  | 0.4921   | 4.1352   | -3.0709 | Down | 1.33E-15  | 4.98E-15  |
| Unigene6198   | Potri.013G155100.4  | 1.2324   | 10.3561  | -3.0709 | Down | 9.91E-23  | 4.82E-22  |
| Unigene26543  | Potri.001G144400.1  | 0.5406   | 4.5427   | -3.0709 | Down | 2.05E-08  | 5.33E-08  |
| Unigene115470 | Potri.016G088000.2  | 0.6431   | 5.4042   | -3.071  | Down | 2.05E-08  | 5.33E-08  |
| Unigene36963  | Potri.016G055700.1  | 1.457    | 12.2439  | -3.071  | Down | 1.33E-15  | 4.98E-15  |
| Unigene101479 | Potri.006G073100.1  | 0.4674   | 3.9279   | -3.071  | Down | 2.05E-08  | 5.34E-08  |
| Unigene115868 | Potri.005G258800.1  | 0.6196   | 5.2067   | -3.071  | Down | 2.05E-08  | 5.33E-08  |
| Unigene38838  | Potri.004G027300.1  | 1.3353   | 11.2212  | -3.071  | Down | 9.91E-23  | 4.82E-22  |
| Unigene108849 | Potri.003G088300.1  | 0.8881   | 7.463    | -3.071  | Down | 2.05E-08  | 5.33E-08  |
| Unigene54793  | Potri.003G028700.1  | 8.5549   | 71.891   | -3.071  | Down | 2.72E-72  | 3.97E-71  |
| Unigene105977 | Potri.002G120900.2  | 0.6155   | 5.1724   | -3.071  | Down | 2.05E-08  | 5.34E-08  |
| Unigene98670  | Potri.002G115500.1  | 0.6757   | 5.6783   | -3.071  | Down | 2.05E-08  | 5.33E-08  |
| Unigene107008 | Potri.008G174500.1  | 0.3614   | 3.0373   | -3.0711 | Down | 2.05E-08  | 5.33E-08  |
| Unigene106089 | Potri.017G123600.1  | 0.7704   | 6.4785   | -3.072  | Down | 1.49E-52  | 1.54E-51  |
| Unigene936    | Potri.006G068500.9  | 8.5428   | 71.8581  | -3.0724 | Down | 1.23E-302 | 1.10E-300 |
| Unigene23056  | Potri.003G071800.1  | 1.1604   | 9.7635   | -3.0728 | Down | 2.63E-31  | 1.65E-30  |
| Unigene106836 | Potri.002G007700.1  | 1.2807   | 10.7793  | -3.0733 | Down | 3.31E-24  | 1.69E-23  |
| Unigene93970  | Potri.015G054600.1  | 26.3826  | 222.0852 | -3.0735 | Down | 0         | 0         |
| Unigene31285  | Potri.015G003700.2  | 3.4867   | 29.3527  | -3.0736 | Down | 1.48E-62  | 1.83E-61  |
| Unigene44827  | Potri.006G173900.1  | 6.7744   | 57.0413  | -3.0738 | Down | 1.84E-239 | 1.19E-237 |
| Unigene19375  | Potri.014G024700.1  | 1.1429   | 9.6265   | -3.0743 | Down | 4.40E-17  | 1.75E-16  |
| Unigene112370 | Potri.015G055400.1  | 1.6954   | 14.2807  | -3.0744 | Down | 4.40E-17  | 1.75E-16  |
| Unigene45446  | Potri.007G102400.3  | 1.1331   | 9.546    | -3.0746 | Down | 3.79E-88  | 6.93E-87  |
| Unigene36558  | Potri.011G098300.1  | 1.1656   | 9.8247   | -3.0753 | Down | 1.11E-25  | 5.93E-25  |
| Unigene4007   | Potri.012G136100.1  | 1.7045   | 14.3673  | -3.0754 | Down | 1.11E-25  | 5.93E-25  |
| Unigene10374  | Potri.006G066800.1  | 1.5157   | 12.7797  | -3.0758 | Down | 2.99E-34  | 2.03E-33  |
| Unigene56809  | Potri.009G103500.1  | 7.6062   | 64.1387  | -3.0759 | Down | 1.73E-75  | 2.65E-74  |
| Unigene7154   | Potri.005G087500.1  | 3.73     | 31.4553  | -3.0761 | Down | 8.34E-43  | 6.98E-42  |
| Unigene78981  | Potri.016G113600.1  | 25.6434  | 216.3304 | -3.0766 | Down | 7.19E-236 | 4.57E-234 |

|               |                    |         |          |         |      |           |           |
|---------------|--------------------|---------|----------|---------|------|-----------|-----------|
| Unigene48477  | Potri.010G046300.1 | 9.3355  | 78.763   | -3.0767 | Down | 0         | 0         |
| Unigene95275  | Potri.006G239900.2 | 0.4834  | 4.0793   | -3.077  | Down | 6.50E-10  | 1.85E-09  |
| Unigene4468   | Potri.011G007800.1 | 1.0036  | 8.4695   | -3.0771 | Down | 6.50E-10  | 1.85E-09  |
| Unigene26048  | Potri.005G011200.1 | 0.9325  | 7.8696   | -3.0771 | Down | 6.50E-10  | 1.85E-09  |
| Unigene65179  | Potri.003G108000.4 | 2.6749  | 22.5742  | -3.0771 | Down | 3.73E-27  | 2.08E-26  |
| Unigene90647  | Potri.001G084400.1 | 81.0234 | 683.7683 | -3.0771 | Down | 0         | 0         |
| Unigene12475  | Potri.019G092000.1 | 0.5375  | 4.5365   | -3.0772 | Down | 3.73E-27  | 2.08E-26  |
| Unigene114542 | Potri.018G107800.1 | 0.8258  | 6.9694   | -3.0772 | Down | 6.50E-10  | 1.85E-09  |
| Unigene103612 | Potri.003G163800.8 | 0.3699  | 3.1218   | -3.0772 | Down | 6.50E-10  | 1.85E-09  |
| Unigene22718  | Potri.017G089800.1 | 9.9044  | 83.5943  | -3.0773 | Down | 0         | 0         |
| Unigene76123  | Potri.006G068500.9 | 12.1557 | 102.6158 | -3.0775 | Down | 1.84E-105 | 4.19E-104 |
| Unigene21892  | Potri.002G026200.1 | 8.2535  | 69.7342  | -3.0788 | Down | 0         | 0         |
| Unigene38642  | Potri.011G057800.6 | 4.0408  | 34.1574  | -3.0795 | Down | 9.38E-76  | 1.44E-74  |
| Unigene26133  | Potri.017G065900.1 | 2.6767  | 22.6316  | -3.0798 | Down | 3.19E-67  | 4.29E-66  |
| Unigene117355 | Potri.005G073800.1 | 0.7314  | 6.191    | -3.0814 | Down | 2.08E-11  | 6.42E-11  |
| Unigene116004 | Potri.001G463700.1 | 0.8561  | 7.2465   | -3.0814 | Down | 2.08E-11  | 6.42E-11  |
| Unigene10210  | Potri.012G116000.1 | 0.9599  | 8.1257   | -3.0815 | Down | 2.08E-11  | 6.42E-11  |
| Unigene36567  | Potri.012G021000.1 | 1.3646  | 11.5515  | -3.0815 | Down | 1.42E-31  | 9.03E-31  |
| Unigene22026  | Potri.010G079400.1 | 2.8811  | 24.3883  | -3.0815 | Down | 1.29E-81  | 2.15E-80  |
| Unigene53045  | Potri.007G106400.2 | 2.5349  | 21.4581  | -3.0815 | Down | 1.61E-21  | 7.52E-21  |
| Unigene99543  | Potri.005G203200.1 | 0.4448  | 3.7652   | -3.0815 | Down | 2.08E-11  | 6.42E-11  |
| Unigene36787  | Potri.003G221000.1 | 1.0239  | 8.6674   | -3.0815 | Down | 2.08E-11  | 6.42E-11  |
| Unigene106501 | Potri.005G147700.1 | 0.4301  | 3.6412   | -3.0817 | Down | 2.08E-11  | 6.42E-11  |
| Unigene89395  | Potri.001G147600.2 | 10.612  | 89.879   | -3.0823 | Down | 6.26E-146 | 2.16E-144 |
| Unigene71     | Potri.014G073500.1 | 11.6478 | 98.6669  | -3.0825 | Down | 0         | 0         |
| Unigene43191  | Potri.010G155400.4 | 1.2072  | 10.2257  | -3.0825 | Down | 4.52E-43  | 3.81E-42  |
| Unigene78190  | Potri.006G110700.1 | 3.4919  | 29.5832  | -3.0827 | Down | 4.80E-33  | 3.17E-32  |
| Unigene117754 | Potri.007G075000.2 | 6.5592  | 55.5843  | -3.0831 | Down | 1.81E-97  | 3.74E-96  |
| Unigene33883  | Potri.010G046300.1 | 4.4916  | 38.0813  | -3.0838 | Down | 2.12E-100 | 4.56E-99  |
| Unigene25802  | Potri.002G168400.1 | 7.5521  | 64.0355  | -3.0839 | Down | 4.84E-189 | 2.36E-187 |
| Unigene75988  | Potri.006G123900.1 | 5.162   | 43.7732  | -3.084  | Down | 5.22E-46  | 4.68E-45  |
| Unigene17623  | Potri.018G006100.2 | 0.6016  | 5.1042   | -3.0848 | Down | 6.74E-13  | 2.23E-12  |
| Unigene10405  | Potri.016G064700.1 | 1.576   | 13.3715  | -3.0848 | Down | 5.48E-36  | 3.90E-35  |
| Unigene113032 | Potri.005G229500.4 | 1.1984  | 10.1673  | -3.0848 | Down | 6.74E-13  | 2.23E-12  |
| Unigene94539  | Potri.004G020200.1 | 0.9688  | 8.2197   | -3.0848 | Down | 6.74E-13  | 2.23E-12  |
| Unigene34371  | Potri.007G100600.1 | 10.8594 | 92.1716  | -3.0854 | Down | 2.01E-166 | 8.29E-165 |
| Unigene46155  | Potri.010G247500.5 | 17.3769 | 147.5047 | -3.0855 | Down | 1.48E-226 | 8.94E-225 |
| Unigene26708  | Potri.002G228300.1 | 2.6643  | 22.6253  | -3.0861 | Down | 6.01E-26  | 3.24E-25  |
| Unigene47992  | Potri.002G225500.2 | 2.4673  | 20.9526  | -3.0861 | Down | 6.01E-26  | 3.24E-25  |

|               |                    |         |          |         |      |           |           |
|---------------|--------------------|---------|----------|---------|------|-----------|-----------|
| Unigene38914  | Potri.001G149400.2 | 8.4546  | 71.7976  | -3.0861 | Down | 1.44E-123 | 4.02E-122 |
| Unigene105428 | Potri.001G070700.1 | 0.9939  | 8.4402   | -3.0861 | Down | 6.01E-26  | 3.24E-25  |
| Unigene49301  | Potri.018G006000.3 | 9.2706  | 78.7318  | -3.0862 | Down | 3.50E-185 | 1.66E-183 |
| Unigene22126  | Potri.011G129300.1 | 1.3985  | 11.8812  | -3.0867 | Down | 3.94E-102 | 8.66E-101 |
| Unigene94310  | Potri.010G159900.1 | 2.2801  | 19.3742  | -3.087  | Down | 9.43E-78  | 1.50E-76  |
| Unigene103043 | Potri.012G081600.1 | 0.6275  | 5.333    | -3.0873 | Down | 2.20E-14  | 7.79E-14  |
| Unigene26594  | Potri.006G194200.2 | 1.0864  | 9.2335   | -3.0873 | Down | 2.20E-14  | 7.79E-14  |
| Unigene115536 | Potri.001G045000.1 | 1.1536  | 9.8046   | -3.0873 | Down | 2.20E-14  | 7.79E-14  |
| Unigene119183 | Potri.017G086000.1 | 1.1024  | 9.3699   | -3.0874 | Down | 2.02E-27  | 1.14E-26  |
| Unigene53570  | Potri.016G075700.2 | 1.5541  | 13.209   | -3.0874 | Down | 2.20E-14  | 7.79E-14  |
| Unigene109240 | Potri.013G041700.1 | 1.576   | 13.3951  | -3.0874 | Down | 2.20E-14  | 7.79E-14  |
| Unigene10933  | Potri.018G137400.1 | 12.4415 | 105.7576 | -3.0875 | Down | 0         | 0         |
| Unigene76078  | Potri.009G045100.2 | 15.6525 | 133.1135 | -3.0882 | Down | 9.58E-137 | 3.04E-135 |
| Unigene99328  | Potri.003G153200.1 | 1.3951  | 11.8657  | -3.0884 | Down | 6.79E-29  | 3.99E-28  |
| Unigene17477  | Potri.001G083900.1 | 11.275  | 95.9555  | -3.0892 | Down | 2.80E-230 | 1.72E-228 |
| Unigene116683 | Potri.005G249600.1 | 1.1372  | 9.6788   | -3.0893 | Down | 7.21E-16  | 2.73E-15  |
| Unigene24675  | Potri.004G069400.1 | 1.7071  | 14.5292  | -3.0893 | Down | 2.29E-30  | 1.40E-29  |
| Unigene12238  | Potri.005G073800.1 | 0.7371  | 6.274    | -3.0895 | Down | 2.29E-30  | 1.40E-29  |
| Unigene84573  | Potri.002G004100.2 | 10.9234 | 93       | -3.0898 | Down | 1.05E-119 | 2.82E-118 |
| Unigene26040  | Potri.019G127700.1 | 9.6451  | 82.1564  | -3.0905 | Down | 5.57E-186 | 2.66E-184 |
| Unigene49382  | Potri.007G136900.1 | 9.2193  | 78.5507  | -3.0909 | Down | 2.27E-190 | 1.11E-188 |
| Unigene30268  | Potri.016G008600.1 | 0.6737  | 5.7407   | -3.091  | Down | 2.38E-17  | 9.56E-17  |
| Unigene99577  | Potri.015G144400.1 | 1.0713  | 9.1282   | -3.091  | Down | 2.38E-17  | 9.56E-17  |
| Unigene53582  | Potri.009G155500.3 | 3.7815  | 32.2222  | -3.091  | Down | 2.60E-33  | 1.73E-32  |
| Unigene117425 | Potri.001G424600.1 | 2.2731  | 19.369   | -3.091  | Down | 2.60E-33  | 1.73E-32  |
| Unigene115620 | Potri.001G412900.8 | 1.3956  | 11.8915  | -3.091  | Down | 2.38E-17  | 9.57E-17  |
| Unigene7133   | Potri.007G096400.9 | 5.9629  | 50.8466  | -3.0921 | Down | 2.82E-137 | 9.00E-136 |
| Unigene5349   | Potri.014G172800.3 | 7.5156  | 64.1014  | -3.0924 | Down | 1.66E-157 | 6.35E-156 |
| Unigene118416 | Potri.005G144700.1 | 1.0219  | 8.716    | -3.0924 | Down | 7.87E-19  | 3.35E-18  |
| Unigene118016 | Potri.004G181100.1 | 1.119   | 9.544    | -3.0924 | Down | 7.87E-19  | 3.35E-18  |
| Unigene116703 | Potri.001G399700.1 | 2.7209  | 23.2073  | -3.0924 | Down | 2.97E-36  | 2.13E-35  |
| Unigene18332  | Potri.002G039000.1 | 2.2316  | 19.0431  | -3.0931 | Down | 1.13E-92  | 2.19E-91  |
| Unigene93284  | Potri.006G228800.1 | 23.7483 | 202.6606 | -3.0932 | Down | 0         | 0         |
| Unigene32738  | Potri.005G237300.1 | 10.6438 | 90.8405  | -3.0933 | Down | 0         | 0         |
| Unigene12648  | Potri.006G237200.2 | 5.9863  | 51.0997  | -3.0936 | Down | 2.22E-114 | 5.63E-113 |
| Unigene33034  | Potri.002G191000.2 | 2.4459  | 20.8781  | -3.0936 | Down | 8.09E-77  | 1.27E-75  |
| Unigene9685   | Potri.001G161600.1 | 1.2338  | 10.532   | -3.0936 | Down | 2.61E-20  | 1.17E-19  |
| Unigene12641  | Potri.001G356800.1 | 2.8692  | 24.5032  | -3.0942 | Down | 5.93E-61  | 7.17E-60  |
| Unigene10214  | Potri.011G040800.1 | 0.7309  | 6.2429   | -3.0945 | Down | 3.91E-42  | 3.23E-41  |

|               |                    |         |          |         |      |           |           |
|---------------|--------------------|---------|----------|---------|------|-----------|-----------|
| Unigene104610 | Potri.014G066700.1 | 0.6495  | 5.548    | -3.0946 | Down | 8.70E-22  | 4.10E-21  |
| Unigene49841  | Potri.010G122400.1 | 1.63    | 13.926   | -3.0948 | Down | 6.90E-64  | 8.80E-63  |
| Unigene9678   | Potri.001G371200.3 | 1.0774  | 9.2058   | -3.095  | Down | 1.33E-43  | 1.13E-42  |
| Unigene11245  | Potri.001G253300.2 | 3.7218  | 31.8133  | -3.0956 | Down | 2.04E-133 | 6.29E-132 |
| Unigene105274 | Potri.017G088900.1 | 0.9564  | 8.1787   | -3.0962 | Down | 9.71E-25  | 5.04E-24  |
| Unigene34910  | Potri.005G254100.7 | 1.7138  | 14.6622  | -3.0968 | Down | 3.25E-26  | 1.77E-25  |
| Unigene25488  | Potri.005G235900.5 | 2.7332  | 23.3836  | -3.0968 | Down | 3.25E-26  | 1.77E-25  |
| Unigene23429  | Potri.009G113300.1 | 2.2508  | 19.2612  | -3.0972 | Down | 2.05E-52  | 2.10E-51  |
| Unigene105624 | Potri.010G229200.1 | 1.2252  | 10.4863  | -3.0974 | Down | 1.09E-27  | 6.20E-27  |
| Unigene22234  | Potri.001G146800.1 | 2.267   | 19.4087  | -3.0978 | Down | 3.08E-219 | 1.78E-217 |
| Unigene88507  | Potri.006G051100.1 | 30.3963 | 260.3042 | -3.0982 | Down | 0         | 0         |
| Unigene39183  | Potri.009G148600.1 | 4.633   | 39.6776  | -3.0983 | Down | 2.41E-87  | 4.37E-86  |
| Unigene6734   | Potri.014G096100.1 | 16.3401 | 140.0168 | -3.0991 | Down | 0         | 0         |
| Unigene10137  | Potri.006G073800.1 | 1.572   | 13.4721  | -3.0993 | Down | 1.28E-65  | 1.68E-64  |
| Unigene28825  | Potri.018G113000.1 | 2.0698  | 17.7441  | -3.0998 | Down | 5.09E-70  | 7.15E-69  |
| Unigene118258 | Potri.017G139400.2 | 2.1213  | 18.1881  | -3.1    | Down | 1.61E-36  | 1.16E-35  |
| Unigene23009  | Potri.018G011500.1 | 1.4595  | 12.5193  | -3.1006 | Down | 1.21E-116 | 3.15E-115 |
| Unigene33585  | Potri.001G039200.2 | 0.9652  | 8.2822   | -3.1011 | Down | 2.12E-42  | 1.76E-41  |
| Unigene553    | Potri.015G067000.3 | 5.8935  | 50.5726  | -3.1012 | Down | 0         | 0         |
| Unigene31389  | Potri.002G159400.1 | 1.8505  | 15.9011  | -3.1031 | Down | 9.10E-123 | 2.52E-121 |
| Unigene43873  | Potri.011G066700.1 | 1.8881  | 16.2318  | -3.1038 | Down | 3.22E-73  | 4.75E-72  |
| Unigene38659  | Potri.006G051100.1 | 7.6146  | 65.5012  | -3.1047 | Down | 1.21E-188 | 5.90E-187 |
| Unigene38138  | Potri.007G096400.1 | 6.8404  | 58.8873  | -3.1058 | Down | 1.04E-156 | 3.96E-155 |
| Unigene16849  | Potri.013G109000.1 | 41.2208 | 354.9693 | -3.1062 | Down | 0         | 0         |
| Unigene109033 | Potri.001G435100.1 | 0.3536  | 3.0472   | -3.1073 | Down | 4.08E-04  | 7.30E-04  |
| Unigene95966  | Potri.017G145300.1 | 0.554   | 4.7745   | -3.1074 | Down | 1.18E-05  | 2.47E-05  |
| Unigene118337 | Potri.015G072400.1 | 0.5217  | 4.4962   | -3.1074 | Down | 3.50E-10  | 1.01E-09  |
| Unigene106184 | Potri.012G111600.1 | 0.5375  | 4.6323   | -3.1074 | Down | 1.11E-08  | 2.92E-08  |
| Unigene97861  | Potri.011G163700.1 | 0.5199  | 4.4806   | -3.1074 | Down | 3.56E-07  | 8.46E-07  |
| Unigene108474 | Potri.010G068400.7 | 0.5406  | 4.6592   | -3.1074 | Down | 1.18E-05  | 2.47E-05  |
| Unigene97887  | Potri.009G075300.2 | 0.4207  | 3.6257   | -3.1074 | Down | 1.18E-05  | 2.47E-05  |
| Unigene99457  | Potri.008G178200.1 | 0.3859  | 3.3257   | -3.1074 | Down | 1.18E-05  | 2.47E-05  |
| Unigene105933 | Potri.002G185900.1 | 0.4158  | 3.5834   | -3.1074 | Down | 1.12E-11  | 3.51E-11  |
| Unigene105617 | Potri.002G152300.3 | 0.3497  | 3.0139   | -3.1074 | Down | 1.18E-05  | 2.47E-05  |
| Unigene7327   | Potri.001G073600.1 | 0.6706  | 5.7794   | -3.1074 | Down | 3.64E-13  | 1.22E-12  |
| Unigene113709 | Potri.T143000.2    | 0.5783  | 4.9842   | -3.1075 | Down | 3.56E-07  | 8.47E-07  |
| Unigene101419 | Potri.T105600.1    | 0.5756  | 4.9611   | -3.1075 | Down | 3.89E-16  | 1.49E-15  |
| Unigene112533 | Potri.019G053600.2 | 0.4586  | 3.9526   | -3.1075 | Down | 1.18E-05  | 2.47E-05  |
| Unigene1351   | Potri.017G032100.1 | 0.7164  | 6.1744   | -3.1075 | Down | 1.57E-23  | 7.83E-23  |

|               |                    |        |         |         |      |           |           |
|---------------|--------------------|--------|---------|---------|------|-----------|-----------|
| Unigene104412 | Potri.016G097300.2 | 0.4114 | 3.5458  | -3.1075 | Down | 1.18E-05  | 2.47E-05  |
| Unigene39520  | Potri.015G023200.1 | 2.0571 | 17.7302 | -3.1075 | Down | 5.15E-135 | 1.61E-133 |
| Unigene36415  | Potri.014G084600.1 | 0.9489 | 8.1786  | -3.1075 | Down | 1.41E-20  | 6.40E-20  |
| Unigene28424  | Potri.013G130300.1 | 5.9607 | 51.3748 | -3.1075 | Down | 2.12E-98  | 4.45E-97  |
| Unigene116501 | Potri.013G043500.1 | 0.4648 | 4.006   | -3.1075 | Down | 3.56E-07  | 8.46E-07  |
| Unigene28308  | Potri.012G140200.1 | 2.2695 | 19.5611 | -3.1075 | Down | 4.36E-69  | 6.05E-68  |
| Unigene114111 | Potri.012G140200.1 | 0.8445 | 7.2788  | -3.1075 | Down | 3.50E-10  | 1.01E-09  |
| Unigene115463 | Potri.012G070800.1 | 0.7717 | 6.6513  | -3.1075 | Down | 3.50E-10  | 1.01E-09  |
| Unigene115608 | Potri.011G169100.1 | 0.3819 | 3.2916  | -3.1075 | Down | 1.18E-05  | 2.47E-05  |
| Unigene48080  | Potri.011G122900.1 | 1.1452 | 9.8701  | -3.1075 | Down | 1.12E-11  | 3.51E-11  |
| Unigene110994 | Potri.011G069500.1 | 0.4908 | 4.23    | -3.1075 | Down | 1.18E-05  | 2.47E-05  |
| Unigene28171  | Potri.009G168300.1 | 1.2653 | 10.9057 | -3.1075 | Down | 2.57E-35  | 1.79E-34  |
| Unigene115399 | Potri.009G051200.3 | 1.6837 | 14.5113 | -3.1075 | Down | 1.41E-20  | 6.40E-20  |
| Unigene46669  | Potri.008G214300.3 | 0.6865 | 5.9168  | -3.1075 | Down | 3.50E-10  | 1.01E-09  |
| Unigene24768  | Potri.006G250200.1 | 3.7478 | 32.302  | -3.1075 | Down | 2.25E-32  | 1.46E-31  |
| Unigene100087 | Potri.006G132300.1 | 0.7173 | 6.1823  | -3.1075 | Down | 3.56E-07  | 8.47E-07  |
| Unigene46153  | Potri.006G088200.2 | 1.047  | 9.024   | -3.1075 | Down | 3.64E-13  | 1.22E-12  |
| Unigene26082  | Potri.006G044100.1 | 5.7645 | 49.6835 | -3.1075 | Down | 1.76E-51  | 1.78E-50  |
| Unigene31518  | Potri.006G003800.3 | 0.6933 | 5.9755  | -3.1075 | Down | 1.11E-08  | 2.92E-08  |
| Unigene109410 | Potri.005G019700.2 | 0.3486 | 3.0045  | -3.1075 | Down | 4.08E-04  | 7.30E-04  |
| Unigene12560  | Potri.004G223900.1 | 0.8811 | 7.5941  | -3.1075 | Down | 3.38E-41  | 2.72E-40  |
| Unigene35509  | Potri.004G181200.1 | 0.891  | 7.6793  | -3.1075 | Down | 7.61E-34  | 5.12E-33  |
| Unigene6077   | Potri.004G124400.1 | 0.4648 | 4.006   | -3.1075 | Down | 3.56E-07  | 8.46E-07  |
| Unigene111274 | Potri.004G090700.1 | 1.9376 | 16.7003 | -3.1075 | Down | 4.25E-19  | 1.83E-18  |
| Unigene21040  | Potri.004G055000.1 | 0.9248 | 7.9706  | -3.1075 | Down | 2.25E-32  | 1.46E-31  |
| Unigene25123  | Potri.003G141800.1 | 2.7049 | 23.3136 | -3.1075 | Down | 1.99E-29  | 1.19E-28  |
| Unigene113555 | Potri.003G088900.1 | 0.5828 | 5.0232  | -3.1075 | Down | 3.56E-07  | 8.47E-07  |
| Unigene6714   | Potri.003G083200.1 | 2.8877 | 24.8889 | -3.1075 | Down | 1.31E-89  | 2.44E-88  |
| Unigene117632 | Potri.003G066000.1 | 0.4    | 3.4475  | -3.1075 | Down | 3.56E-07  | 8.46E-07  |
| Unigene20162  | Potri.002G230000.3 | 7.8525 | 67.6803 | -3.1075 | Down | 1.80E-95  | 3.63E-94  |
| Unigene112186 | Potri.002G212900.1 | 0.9325 | 8.037   | -3.1075 | Down | 3.50E-10  | 1.01E-09  |
| Unigene101338 | Potri.002G005200.1 | 0.6687 | 5.7636  | -3.1075 | Down | 1.19E-14  | 4.26E-14  |
| Unigene103034 | Potri.001G289800.4 | 0.4494 | 3.8733  | -3.1075 | Down | 3.56E-07  | 8.47E-07  |
| Unigene107551 | Potri.001G287600.3 | 0.5567 | 4.7982  | -3.1075 | Down | 1.18E-05  | 2.47E-05  |
| Unigene26472  | Potri.001G255400.1 | 1.8121 | 15.6185 | -3.1075 | Down | 4.25E-19  | 1.83E-18  |
| Unigene115934 | Potri.001G253200.1 | 0.6155 | 5.305   | -3.1075 | Down | 1.11E-08  | 2.92E-08  |
| Unigene113854 | Potri.019G049200.1 | 0.4287 | 3.6952  | -3.1076 | Down | 1.18E-05  | 2.47E-05  |
| Unigene112213 | Potri.017G155300.6 | 0.4662 | 4.0185  | -3.1076 | Down | 1.18E-05  | 2.47E-05  |
| Unigene95296  | Potri.017G020800.1 | 0.3502 | 3.0186  | -3.1076 | Down | 4.08E-04  | 7.29E-04  |

|               |                    |         |          |         |      |           |           |
|---------------|--------------------|---------|----------|---------|------|-----------|-----------|
| Unigene114394 | Potri.016G018400.1 | 0.5546  | 4.7804   | -3.1076 | Down | 3.56E-07  | 8.47E-07  |
| Unigene44586  | Potri.016G008800.1 | 0.7194  | 6.2007   | -3.1076 | Down | 1.41E-20  | 6.40E-20  |
| Unigene100102 | Potri.014G100100.4 | 0.8159  | 7.0324   | -3.1076 | Down | 1.12E-11  | 3.51E-11  |
| Unigene113697 | Potri.012G022600.2 | 0.4337  | 3.7382   | -3.1076 | Down | 1.18E-05  | 2.47E-05  |
| Unigene99374  | Potri.011G089500.2 | 0.504   | 4.3443   | -3.1076 | Down | 1.11E-08  | 2.92E-08  |
| Unigene99039  | Potri.010G002200.2 | 0.5883  | 5.0707   | -3.1076 | Down | 1.11E-08  | 2.92E-08  |
| Unigene105551 | Potri.006G110300.1 | 0.6406  | 5.5216   | -3.1076 | Down | 1.19E-14  | 4.26E-14  |
| Unigene109133 | Potri.005G006100.1 | 0.5278  | 4.5493   | -3.1076 | Down | 1.18E-05  | 2.47E-05  |
| Unigene106601 | Potri.004G182800.4 | 0.3559  | 3.0676   | -3.1076 | Down | 1.11E-08  | 2.92E-08  |
| Unigene40497  | Potri.004G017600.1 | 0.6231  | 5.3708   | -3.1076 | Down | 1.12E-11  | 3.51E-11  |
| Unigene101270 | Potri.003G073200.2 | 0.3992  | 3.4409   | -3.1076 | Down | 1.12E-11  | 3.51E-11  |
| Unigene108907 | Potri.002G049500.1 | 0.3552  | 3.0617   | -3.1076 | Down | 4.08E-04  | 7.30E-04  |
| Unigene100344 | Potri.001G241700.1 | 0.4741  | 4.0866   | -3.1076 | Down | 1.18E-05  | 2.47E-05  |
| Unigene115393 | Potri.001G213800.3 | 0.518   | 4.465    | -3.1076 | Down | 3.56E-07  | 8.46E-07  |
| Unigene108227 | Potri.001G051200.2 | 0.3621  | 3.1212   | -3.1076 | Down | 4.08E-04  | 7.30E-04  |
| Unigene99232  | Potri.012G051000.1 | 0.444   | 3.8272   | -3.1077 | Down | 1.18E-05  | 2.47E-05  |
| Unigene117447 | Potri.008G120200.2 | 0.4121  | 3.5523   | -3.1077 | Down | 3.56E-07  | 8.46E-07  |
| Unigene63213  | Potri.018G049500.1 | 5.944   | 51.2988  | -3.1094 | Down | 5.82E-279 | 4.63E-277 |
| Unigene83599  | Potri.007G031800.1 | 17.067  | 147.3952 | -3.1104 | Down | 7.46E-184 | 3.50E-182 |
| Unigene967    | Potri.001G131300.1 | 20.2107 | 174.5998 | -3.1109 | Down | 0         | 0         |
| Unigene60922  | Potri.T004100.1    | 4.1444  | 35.8377  | -3.1122 | Down | 1.39E-113 | 3.50E-112 |
| Unigene18729  | Potri.007G130100.1 | 3.0349  | 26.2628  | -3.1133 | Down | 2.42E-47  | 2.24E-46  |
| Unigene102918 | Potri.015G120400.4 | 1.457   | 12.6102  | -3.1135 | Down | 7.13E-46  | 6.38E-45  |
| Unigene117667 | Potri.003G102700.1 | 2.48    | 21.482   | -3.1147 | Down | 1.59E-38  | 1.20E-37  |
| Unigene30993  | Potri.001G084600.2 | 3.9964  | 34.6167  | -3.1147 | Down | 2.20E-112 | 5.45E-111 |
| Unigene73124  | Potri.016G133500.1 | 17.4065 | 150.7902 | -3.1148 | Down | 2.49E-146 | 8.64E-145 |
| Unigene99866  | Potri.011G128900.2 | 1.5224  | 13.1963  | -3.1157 | Down | 4.11E-34  | 2.79E-33  |
| Unigene52878  | Potri.001G250500.1 | 1.0797  | 9.3589   | -3.1157 | Down | 4.11E-34  | 2.79E-33  |
| Unigene92057  | Potri.006G006000.1 | 54.179  | 469.7145 | -3.116  | Down | 0         | 0         |
| Unigene10633  | Potri.002G205500.1 | 6.7663  | 58.6681  | -3.1161 | Down | 0         | 0         |
| Unigene21936  | Potri.003G168900.1 | 1.9043  | 16.512   | -3.1162 | Down | 2.22E-155 | 8.33E-154 |
| Unigene21346  | Potri.005G228200.1 | 5.1003  | 44.2309  | -3.1164 | Down | 0         | 0         |
| Unigene119530 | Potri.005G102800.4 | 0.6182  | 5.3654   | -3.1175 | Down | 3.19E-28  | 1.84E-27  |
| Unigene30830  | Potri.001G395900.1 | 1.2319  | 10.6915  | -3.1175 | Down | 3.19E-28  | 1.84E-27  |
| Unigene82397  | Potri.016G113600.1 | 29.1537 | 253.1206 | -3.1181 | Down | 1.40E-303 | 1.26E-301 |
| Unigene93367  | Potri.017G052400.1 | 12.6083 | 109.5188 | -3.1187 | Down | 5.13E-286 | 4.27E-284 |
| Unigene47286  | Potri.004G084000.1 | 4.9414  | 42.9329  | -3.1191 | Down | 1.32E-93  | 2.58E-92  |
| Unigene43508  | Potri.003G112600.7 | 7.2433  | 62.9398  | -3.1193 | Down | 0         | 0         |
| Unigene48427  | Potri.013G135700.1 | 1.3781  | 11.9764  | -3.1194 | Down | 8.47E-24  | 4.27E-23  |

|               |                    |         |          |         |      |           |           |
|---------------|--------------------|---------|----------|---------|------|-----------|-----------|
| Unigene7537   | Potri.012G016400.1 | 1.3042  | 11.3343  | -3.1195 | Down | 8.47E-24  | 4.27E-23  |
| Unigene3855   | Potri.003G160400.1 | 1.0477  | 9.1056   | -3.1195 | Down | 8.47E-24  | 4.27E-23  |
| Unigene118841 | Potri.001G085400.4 | 2.2246  | 19.3336  | -3.1195 | Down | 3.86E-46  | 3.47E-45  |
| Unigene47796  | Potri.009G029600.2 | 6.7255  | 58.4552  | -3.1196 | Down | 2.53E-243 | 1.68E-241 |
| Unigene21038  | Potri.017G061600.1 | 8.6944  | 75.5796  | -3.1198 | Down | 0         | 0         |
| Unigene66947  | Potri.001G184700.1 | 3.0808  | 26.7901  | -3.1203 | Down | 3.35E-43  | 2.82E-42  |
| Unigene9223   | Potri.009G106600.3 | 1.591   | 13.8395  | -3.1208 | Down | 9.86E-42  | 8.06E-41  |
| Unigene98182  | Potri.016G137000.1 | 0.4122  | 3.5886   | -3.122  | Down | 8.59E-39  | 6.54E-38  |
| Unigene394    | Potri.002G000800.1 | 10.6708 | 92.9088  | -3.1221 | Down | 0         | 0         |
| Unigene119002 | Potri.005G238800.2 | 0.8228  | 7.1654   | -3.1224 | Down | 2.29E-19  | 9.97E-19  |
| Unigene70649  | Potri.014G084500.1 | 4.4759  | 38.9796  | -3.1225 | Down | 2.54E-37  | 1.87E-36  |
| Unigene101777 | Potri.013G116700.1 | 1.0507  | 9.1502   | -3.1225 | Down | 2.54E-37  | 1.87E-36  |
| Unigene20266  | Potri.001G220100.1 | 1.3011  | 11.3313  | -3.1225 | Down | 2.29E-19  | 9.97E-19  |
| Unigene56285  | Potri.001G403300.1 | 3.8819  | 33.821   | -3.1231 | Down | 7.50E-36  | 5.32E-35  |
| Unigene32145  | Potri.013G109300.1 | 7.3831  | 64.3401  | -3.1234 | Down | 0         | 0         |
| Unigene21089  | Potri.017G128700.1 | 8.8017  | 76.7232  | -3.1238 | Down | 1.36E-214 | 7.65E-213 |
| Unigene12831  | Potri.010G127600.1 | 6.4832  | 56.5133  | -3.1238 | Down | 2.21E-116 | 5.73E-115 |
| Unigene106763 | Potri.008G155500.1 | 0.5253  | 4.5794   | -3.1239 | Down | 6.93E-18  | 2.85E-17  |
| Unigene57847  | Potri.016G021700.1 | 8.1086  | 70.6937  | -3.1241 | Down | 1.55E-98  | 3.26E-97  |
| Unigene23449  | Potri.010G074300.1 | 6.9937  | 60.9787  | -3.1242 | Down | 7.71E-194 | 3.86E-192 |
| Unigene30747  | Potri.008G049600.1 | 3.8753  | 33.7921  | -3.1243 | Down | 2.41E-49  | 2.32E-48  |
| Unigene22421  | Potri.017G107600.3 | 19.6131 | 171.0666 | -3.1247 | Down | 0         | 0         |
| Unigene8809   | Potri.016G006500.1 | 4.3569  | 38.0099  | -3.125  | Down | 8.04E-63  | 1.00E-61  |
| Unigene102693 | Potri.014G013100.1 | 1.2517  | 10.9228  | -3.1254 | Down | 2.10E-16  | 8.13E-16  |
| Unigene32120  | Potri.009G110000.1 | 1.492   | 13.02    | -3.1254 | Down | 5.95E-136 | 1.87E-134 |
| Unigene30756  | Potri.007G029200.1 | 2.9065  | 25.3636  | -3.1254 | Down | 2.08E-46  | 1.89E-45  |
| Unigene105940 | Potri.001G403700.3 | 0.6782  | 5.9182   | -3.1254 | Down | 2.10E-16  | 8.13E-16  |
| Unigene41069  | Potri.003G201400.1 | 19.667  | 171.634  | -3.1255 | Down | 0         | 0         |
| Unigene70215  | Potri.017G035400.1 | 11.6336 | 101.5613 | -3.126  | Down | 4.45E-291 | 3.80E-289 |
| Unigene52964  | Potri.019G053200.4 | 6.5217  | 56.9496  | -3.1264 | Down | 8.17E-87  | 1.47E-85  |
| Unigene19304  | Potri.009G103500.1 | 1.9686  | 17.1903  | -3.1264 | Down | 5.79E-30  | 3.51E-29  |
| Unigene76652  | Potri.016G065900.7 | 21.5253 | 188.003  | -3.1267 | Down | 2.67E-197 | 1.36E-195 |
| Unigene23463  | Potri.012G143900.1 | 9.1014  | 79.4949  | -3.1267 | Down | 5.85E-169 | 2.46E-167 |
| Unigene98874  | Potri.019G055000.4 | 1.4346  | 12.5364  | -3.1274 | Down | 6.40E-15  | 2.32E-14  |
| Unigene84546  | Potri.016G066000.4 | 50.6686 | 442.7574 | -3.1274 | Down | 0         | 0         |
| Unigene8930   | Potri.010G123200.1 | 1.0235  | 8.9437   | -3.1274 | Down | 6.40E-15  | 2.32E-14  |
| Unigene98476  | Potri.008G021400.2 | 0.6936  | 6.061    | -3.1274 | Down | 6.40E-15  | 2.32E-14  |
| Unigene49066  | Potri.005G106400.8 | 5.4904  | 47.9781  | -3.1274 | Down | 7.12E-96  | 1.44E-94  |
| Unigene61954  | Potri.003G028200.1 | 2.3641  | 20.6586  | -3.1274 | Down | 1.72E-28  | 1.00E-27  |

|               |                     |         |          |         |      |           |           |
|---------------|---------------------|---------|----------|---------|------|-----------|-----------|
| Unigene35829  | Potri.010G223700.1  | 0.6907  | 6.036    | -3.1275 | Down | 6.40E-15  | 2.32E-14  |
| Unigene10961  | Potri.011G150800.1  | 11.9453 | 104.4477 | -3.1283 | Down | 0         | 0         |
| Unigene102573 | Potri.018G019900.1  | 1.3101  | 11.4578  | -3.1286 | Down | 5.13E-27  | 2.85E-26  |
| Unigene61109  | Potri.006G177000.1  | 5.7298  | 50.1105  | -3.1286 | Down | 5.09E-78  | 8.10E-77  |
| Unigene27851  | Potri.016G118500.1  | 1.7986  | 15.7327  | -3.1288 | Down | 1.48E-64  | 1.91E-63  |
| Unigene32272  | Potri.005G049800.1  | 11.3637 | 99.4472  | -3.1295 | Down | 0         | 0         |
| Unigene41574  | Potri.014G140100.2  | 2.8013  | 24.5163  | -3.1296 | Down | 4.67E-111 | 1.14E-109 |
| Unigene23984  | Potri.002G250000.1  | 3.384   | 29.6166  | -3.1296 | Down | 5.06E-135 | 1.58E-133 |
| Unigene47736  | Potri.017G071400.1  | 0.8526  | 7.463    | -3.1298 | Down | 1.96E-13  | 6.66E-13  |
| Unigene96127  | Potri.006G126800.1  | 0.7593  | 6.6464   | -3.1298 | Down | 1.96E-13  | 6.66E-13  |
| Unigene94600  | Potri.004G169300.2  | 1.1611  | 10.1636  | -3.1298 | Down | 1.96E-13  | 6.66E-13  |
| Unigene95936  | Potri.001G289400.10 | 0.7691  | 6.7321   | -3.1298 | Down | 1.53E-25  | 8.13E-25  |
| Unigene115723 | Potri.006G260100.1  | 1.0047  | 8.7947   | -3.1299 | Down | 1.96E-13  | 6.66E-13  |
| Unigene52540  | Potri.001G082900.1  | 0.9473  | 8.2922   | -3.1299 | Down | 1.96E-13  | 6.66E-13  |
| Unigene31213  | Potri.001G079500.1  | 2.6099  | 22.8458  | -3.1299 | Down | 1.37E-37  | 1.02E-36  |
| Unigene4941   | Potri.013G064700.3  | 0.5822  | 5.0967   | -3.13   | Down | 1.53E-25  | 8.14E-25  |
| Unigene48741  | Potri.007G031800.1  | 23.6301 | 206.8625 | -3.13   | Down | 0         | 0         |
| Unigene19858  | Potri.010G024500.1  | 2.3124  | 20.2551  | -3.1308 | Down | 4.05E-36  | 2.89E-35  |
| Unigene48497  | Potri.004G216100.2  | 5.4312  | 47.5855  | -3.1312 | Down | 9.84E-104 | 2.20E-102 |
| Unigene20307  | Potri.003G061800.3  | 0.849   | 7.4394   | -3.1313 | Down | 4.57E-24  | 2.32E-23  |
| Unigene74300  | Potri.007G091100.1  | 10.2357 | 89.7158  | -3.1318 | Down | 2.80E-90  | 5.25E-89  |
| Unigene87708  | Potri.013G009900.2  | 25.1772 | 220.7675 | -3.1323 | Down | 0         | 0         |
| Unigene39368  | Potri.002G055000.3  | 4.857   | 42.6003  | -3.1327 | Down | 6.48E-119 | 1.73E-117 |
| Unigene30457  | Potri.014G155700.1  | 0.3956  | 3.4705   | -3.133  | Down | 6.05E-12  | 1.92E-11  |
| Unigene35458  | Potri.019G086400.1  | 1.1708  | 10.2716  | -3.1331 | Down | 1.37E-22  | 6.62E-22  |
| Unigene97604  | Potri.011G128800.1  | 0.5627  | 4.9365   | -3.1331 | Down | 6.05E-12  | 1.92E-11  |
| Unigene26568  | Potri.011G024700.1  | 0.9706  | 8.5151   | -3.1331 | Down | 6.05E-12  | 1.92E-11  |
| Unigene48536  | Potri.008G186500.7  | 2.0553  | 18.0423  | -3.134  | Down | 2.88E-42  | 2.38E-41  |
| Unigene16712  | Potri.008G111200.1  | 8.2888  | 72.7732  | -3.1342 | Down | 2.71E-203 | 1.43E-201 |
| Unigene75597  | Potri.015G066000.1  | 6.751   | 59.2777  | -3.1343 | Down | 6.88E-62  | 8.45E-61  |
| Unigene23064  | Potri.017G089800.5  | 9.0106  | 79.1513  | -3.1349 | Down | 0         | 0         |
| Unigene111158 | Potri.015G022100.1  | 2.1082  | 18.5201  | -3.135  | Down | 4.11E-21  | 1.90E-20  |
| Unigene72605  | Potri.008G130000.1  | 4.685   | 41.1559  | -3.135  | Down | 8.48E-41  | 6.78E-40  |
| Unigene117558 | Potri.006G151100.2  | 1.3141  | 11.5437  | -3.135  | Down | 4.11E-21  | 1.90E-20  |
| Unigene103993 | Potri.003G191600.1  | 0.9583  | 8.4182   | -3.135  | Down | 8.48E-41  | 6.78E-40  |
| Unigene52396  | Potri.012G017500.1  | 6.1684  | 54.2033  | -3.1354 | Down | 3.85E-98  | 8.05E-97  |
| Unigene12428  | Potri.009G151300.1  | 4.3345  | 38.0961  | -3.1357 | Down | 2.97E-116 | 7.69E-115 |
| Unigene88975  | Potri.007G031800.1  | 19.1363 | 168.3119 | -3.1368 | Down | 1.30E-268 | 9.86E-267 |
| Unigene106066 | Potri.010G190300.1  | 0.4231  | 3.7223   | -3.1371 | Down | 1.88E-10  | 5.52E-10  |



|               |                    |         |          |         |      |           |           |
|---------------|--------------------|---------|----------|---------|------|-----------|-----------|
| Unigene3003   | Potri.018G038400.1 | 1.0691  | 9.4064   | -3.1372 | Down | 9.29E-29  | 5.45E-28  |
| Unigene95035  | Potri.017G060200.1 | 0.7771  | 6.8371   | -3.1372 | Down | 1.88E-10  | 5.51E-10  |
| Unigene96398  | Potri.009G155900.1 | 1.0657  | 9.3765   | -3.1372 | Down | 1.24E-19  | 5.43E-19  |
| Unigene5041   | Potri.005G000700.1 | 0.7038  | 6.1921   | -3.1372 | Down | 1.88E-10  | 5.51E-10  |
| Unigene118658 | Potri.001G081300.1 | 0.4782  | 4.2074   | -3.1372 | Down | 1.88E-10  | 5.52E-10  |
| Unigene111537 | Potri.012G117600.2 | 0.9564  | 8.4149   | -3.1373 | Down | 1.88E-10  | 5.52E-10  |
| Unigene99463  | Potri.012G049800.1 | 2.3475  | 20.6546  | -3.1373 | Down | 9.29E-29  | 5.45E-28  |
| Unigene106247 | Potri.002G175000.1 | 0.3806  | 3.3488   | -3.1373 | Down | 1.88E-10  | 5.52E-10  |
| Unigene30847  | Potri.002G111200.1 | 0.494   | 4.3467   | -3.1373 | Down | 1.88E-10  | 5.52E-10  |
| Unigene62080  | Potri.001G368600.1 | 0.5738  | 5.0489   | -3.1373 | Down | 1.88E-10  | 5.51E-10  |
| Unigene68126  | Potri.001G231300.1 | 9.391   | 82.6504  | -3.1377 | Down | 6.25E-109 | 1.49E-107 |
| Unigene11320  | Potri.015G011900.2 | 3.4743  | 30.5803  | -3.1378 | Down | 8.82E-162 | 3.50E-160 |
| Unigene32028  | Potri.018G105700.1 | 5.7757  | 50.8437  | -3.138  | Down | 0         | 0         |
| Unigene36678  | Potri.001G165800.1 | 6.6882  | 58.8921  | -3.1384 | Down | 2.74E-80  | 4.52E-79  |
| Unigene61363  | Potri.002G134400.1 | 5.1487  | 45.3624  | -3.1392 | Down | 9.30E-70  | 1.30E-68  |
| Unigene52792  | Potri.018G081700.3 | 2.2019  | 19.4047  | -3.1396 | Down | 2.34E-77  | 3.70E-76  |
| Unigene14994  | Potri.004G162400.7 | 5.725   | 50.4651  | -3.1399 | Down | 1.29E-51  | 1.30E-50  |
| Unigene38047  | Potri.001G029400.1 | 0.7074  | 6.2356   | -3.1399 | Down | 3.73E-18  | 1.55E-17  |
| Unigene98061  | Potri.001G337300.1 | 2.9884  | 26.3529  | -3.1405 | Down | 1.55E-42  | 1.29E-41  |
| Unigene42864  | Potri.018G130800.1 | 10.9383 | 96.4759  | -3.1408 | Down | 0         | 0         |
| Unigene32323  | Potri.017G080200.1 | 2.0242  | 17.8536  | -3.1408 | Down | 2.53E-115 | 6.48E-114 |
| Unigene100041 | Potri.012G123200.1 | 1.4109  | 12.4451  | -3.1409 | Down | 8.25E-26  | 4.42E-25  |
| Unigene80106  | Potri.006G275000.5 | 14.5559 | 128.3966 | -3.1409 | Down | 3.83E-147 | 1.34E-145 |
| Unigene33859  | Potri.002G119800.1 | 1.8708  | 16.5024  | -3.1409 | Down | 3.79E-50  | 3.71E-49  |
| Unigene44673  | Potri.008G111200.1 | 3.8314  | 33.8114  | -3.1416 | Down | 8.37E-105 | 1.89E-103 |
| Unigene87097  | Potri.001G375800.1 | 22.6676 | 200.1508 | -3.1424 | Down | 2.62E-288 | 2.21E-286 |
| Unigene118700 | Potri.007G051900.1 | 0.3935  | 3.4759   | -3.143  | Down | 5.94E-09  | 1.59E-08  |
| Unigene113875 | Potri.006G170400.2 | 0.7146  | 6.3126   | -3.143  | Down | 5.94E-09  | 1.59E-08  |
| Unigene53598  | Potri.018G069600.1 | 0.8401  | 7.4216   | -3.1431 | Down | 5.94E-09  | 1.59E-08  |
| Unigene114691 | Potri.011G002600.1 | 1.3613  | 12.0262  | -3.1431 | Down | 1.13E-16  | 4.43E-16  |
| Unigene96613  | Potri.001G262500.1 | 0.4686  | 4.1397   | -3.1431 | Down | 5.94E-09  | 1.59E-08  |
| Unigene29891  | Potri.001G122800.2 | 0.7401  | 6.5381   | -3.1431 | Down | 5.94E-09  | 1.59E-08  |
| Unigene109749 | Potri.014G000500.5 | 0.8594  | 7.5926   | -3.1432 | Down | 5.94E-09  | 1.59E-08  |
| Unigene118703 | Potri.012G046400.1 | 0.7869  | 6.9519   | -3.1432 | Down | 1.13E-16  | 4.43E-16  |
| Unigene116108 | Potri.008G129300.4 | 0.6055  | 5.3493   | -3.1432 | Down | 5.94E-09  | 1.59E-08  |
| Unigene101810 | Potri.005G147700.1 | 0.6258  | 5.5288   | -3.1432 | Down | 5.94E-09  | 1.59E-08  |
| Unigene3446   | Potri.005G094600.3 | 1.4401  | 12.7227  | -3.1432 | Down | 1.13E-16  | 4.42E-16  |
| Unigene106054 | Potri.003G149000.1 | 0.5958  | 5.2639   | -3.1432 | Down | 5.94E-09  | 1.59E-08  |
| Unigene118221 | Potri.009G097700.1 | 0.4472  | 3.9511   | -3.1433 | Down | 5.94E-09  | 1.59E-08  |

|               |                    |         |          |         |      |           |           |
|---------------|--------------------|---------|----------|---------|------|-----------|-----------|
| Unigene42745  | Potri.005G119900.2 | 9.5137  | 84.0656  | -3.1434 | Down | 0         | 0         |
| Unigene79025  | Potri.010G141400.2 | 49.8881 | 441.2001 | -3.1447 | Down | 0         | 0         |
| Unigene88134  | Potri.014G096100.2 | 23.6116 | 208.9139 | -3.1453 | Down | 0         | 0         |
| Unigene11868  | Potri.007G082500.7 | 9.5913  | 84.8747  | -3.1455 | Down | 9.39E-180 | 4.26E-178 |
| Unigene104655 | Potri.001G318500.1 | 0.9097  | 8.051    | -3.1457 | Down | 7.37E-23  | 3.60E-22  |
| Unigene56792  | Potri.018G143400.1 | 4.8766  | 43.1671  | -3.146  | Down | 5.05E-58  | 5.79E-57  |
| Unigene38229  | Potri.005G024200.6 | 3.9353  | 34.8395  | -3.1462 | Down | 9.25E-72  | 1.34E-70  |
| Unigene78169  | Potri.019G093400.1 | 29.8396 | 264.1964 | -3.1463 | Down | 6.46E-288 | 5.43E-286 |
| Unigene12129  | Potri.004G131300.1 | 1.1683  | 10.3471  | -3.1467 | Down | 2.44E-105 | 5.54E-104 |
| Unigene14790  | Potri.010G115000.1 | 12.6572 | 112.1083 | -3.1469 | Down | 6.71E-174 | 2.91E-172 |
| Unigene117907 | Potri.007G111900.2 | 0.8564  | 7.586    | -3.147  | Down | 3.44E-15  | 1.26E-14  |
| Unigene116938 | Potri.007G082500.1 | 0.9932  | 8.7979   | -3.147  | Down | 3.44E-15  | 1.26E-14  |
| Unigene20881  | Potri.005G086500.1 | 3.2698  | 28.9647  | -3.147  | Down | 8.37E-43  | 7.00E-42  |
| Unigene29699  | Potri.003G024800.1 | 0.7362  | 6.5213   | -3.147  | Down | 5.01E-29  | 2.96E-28  |
| Unigene38478  | Potri.013G026400.4 | 0.9744  | 8.6319   | -3.1471 | Down | 5.01E-29  | 2.96E-28  |
| Unigene8739   | Potri.002G150000.1 | 0.5503  | 4.8749   | -3.1471 | Down | 3.44E-15  | 1.26E-14  |
| Unigene45797  | Potri.016G021800.1 | 5.0714  | 44.944   | -3.1477 | Down | 2.78E-96  | 5.67E-95  |
| Unigene88630  | Potri.001G131700.1 | 22.0256 | 195.2023 | -3.1477 | Down | 4.00E-305 | 3.62E-303 |
| Unigene91485  | Potri.005G043900.1 | 3.8799  | 34.3902  | -3.1479 | Down | 7.92E-69  | 1.09E-67  |
| Unigene106534 | Potri.001G220800.3 | 1.1334  | 10.0463  | -3.1479 | Down | 3.49E-35  | 2.43E-34  |
| Unigene52365  | Potri.003G157300.1 | 1.0339  | 9.1681   | -3.1485 | Down | 2.21E-21  | 1.03E-20  |
| Unigene90206  | Potri.005G231300.1 | 25.0653 | 222.3581 | -3.1491 | Down | 0         | 0         |
| Unigene98123  | Potri.005G125400.1 | 1.7     | 15.0829  | -3.1493 | Down | 1.49E-27  | 8.43E-27  |
| Unigene33711  | Potri.004G220100.1 | 1.5372  | 13.6386  | -3.1493 | Down | 1.28E-53  | 1.34E-52  |
| Unigene35984  | Potri.005G165700.1 | 1.8065  | 16.0283  | -3.1494 | Down | 1.49E-27  | 8.43E-27  |
| Unigene38170  | Potri.010G102600.2 | 3.6855  | 32.7232  | -3.1504 | Down | 2.02E-90  | 3.80E-89  |
| Unigene115023 | Potri.014G023200.5 | 0.531   | 4.7193   | -3.1518 | Down | 1.91E-07  | 4.63E-07  |
| Unigene117484 | Potri.013G083400.1 | 0.4088  | 3.6332   | -3.1518 | Down | 1.91E-07  | 4.63E-07  |
| Unigene40977  | Potri.011G146500.1 | 1.2591  | 11.1908  | -3.1518 | Down | 1.05E-13  | 3.63E-13  |
| Unigene3651   | Potri.006G258300.1 | 0.6573  | 5.8419   | -3.1518 | Down | 1.91E-07  | 4.63E-07  |
| Unigene116417 | Potri.005G238200.1 | 0.4692  | 4.1702   | -3.1518 | Down | 1.91E-07  | 4.63E-07  |
| Unigene110886 | Potri.001G215000.1 | 0.6573  | 5.8419   | -3.1518 | Down | 1.91E-07  | 4.63E-07  |
| Unigene114956 | Potri.001G130100.4 | 0.5348  | 4.7531   | -3.1518 | Down | 1.91E-07  | 4.63E-07  |
| Unigene115565 | Potri.001G078500.1 | 0.511   | 4.5415   | -3.1518 | Down | 1.91E-07  | 4.63E-07  |
| Unigene118008 | Potri.017G111800.6 | 0.373   | 3.3153   | -3.1519 | Down | 1.91E-07  | 4.63E-07  |
| Unigene112482 | Potri.010G230300.1 | 0.614   | 5.4573   | -3.1519 | Down | 1.91E-07  | 4.63E-07  |
| Unigene109370 | Potri.008G137900.2 | 0.6972  | 6.1968   | -3.1519 | Down | 1.91E-07  | 4.63E-07  |
| Unigene17631  | Potri.008G040500.2 | 3.6645  | 32.5712  | -3.1519 | Down | 1.53E-44  | 1.33E-43  |
| Unigene26129  | Potri.002G259600.2 | 0.5673  | 5.0423   | -3.1519 | Down | 1.91E-07  | 4.63E-07  |

|               |                    |         |          |         |      |           |           |
|---------------|--------------------|---------|----------|---------|------|-----------|-----------|
| Unigene117083 | Potri.017G059500.1 | 0.4337  | 3.855    | -3.152  | Down | 1.91E-07  | 4.63E-07  |
| Unigene37367  | Potri.015G118600.1 | 0.3926  | 3.4898   | -3.152  | Down | 1.91E-07  | 4.63E-07  |
| Unigene117354 | Potri.010G002500.8 | 0.4179  | 3.7146   | -3.152  | Down | 1.91E-07  | 4.63E-07  |
| Unigene117458 | Potri.006G280800.1 | 0.411   | 3.6532   | -3.152  | Down | 1.91E-07  | 4.63E-07  |
| Unigene117810 | Potri.005G232600.1 | 0.3875  | 3.4444   | -3.152  | Down | 1.91E-07  | 4.63E-07  |
| Unigene4350   | Potri.004G113700.1 | 0.3796  | 3.3743   | -3.152  | Down | 1.91E-07  | 4.63E-07  |
| Unigene115161 | Potri.003G078500.3 | 0.5253  | 4.6694   | -3.152  | Down | 1.91E-07  | 4.63E-07  |
| Unigene119219 | Potri.001G262300.1 | 0.7127  | 6.3349   | -3.152  | Down | 6.66E-20  | 2.95E-19  |
| Unigene19318  | Potri.001G314800.3 | 4.6955  | 41.7527  | -3.1525 | Down | 1.55E-110 | 3.76E-109 |
| Unigene35901  | Potri.003G151000.1 | 10.7076 | 95.2432  | -3.153  | Down | 0         | 0         |
| Unigene79378  | Potri.008G203400.6 | 23.2737 | 207.07   | -3.1533 | Down | 2.97E-233 | 1.85E-231 |
| Unigene44937  | Potri.007G112600.1 | 25.3977 | 226.1133 | -3.1543 | Down | 0         | 0         |
| Unigene33627  | Potri.005G050900.1 | 2.4866  | 22.1465  | -3.1548 | Down | 7.88E-71  | 1.12E-69  |
| Unigene19806  | Potri.004G084900.1 | 1.0304  | 9.1767   | -3.1548 | Down | 1.33E-24  | 6.86E-24  |
| Unigene64743  | Potri.001G003800.1 | 3.1183  | 27.7808  | -3.1553 | Down | 1.33E-41  | 1.08E-40  |
| Unigene108597 | Potri.003G139100.1 | 1.9726  | 17.581   | -3.1558 | Down | 2.01E-18  | 8.44E-18  |
| Unigene20461  | Potri.003G087200.1 | 1.0232  | 9.1193   | -3.1558 | Down | 2.01E-18  | 8.44E-18  |
| Unigene71171  | Potri.015G037500.1 | 4.0623  | 36.2065  | -3.1559 | Down | 1.88E-35  | 1.32E-34  |
| Unigene117495 | Potri.008G016000.2 | 1.1241  | 10.0188  | -3.1559 | Down | 2.01E-18  | 8.44E-18  |
| Unigene95640  | Potri.015G056400.1 | 0.5597  | 4.9889   | -3.156  | Down | 2.02E-52  | 2.08E-51  |
| Unigene54798  | Potri.006G237200.2 | 6.1798  | 55.0862  | -3.1561 | Down | 6.49E-131 | 1.95E-129 |
| Unigene104853 | Potri.008G136400.1 | 4.1722  | 37.2185  | -3.1571 | Down | 1.07E-78  | 1.72E-77  |
| Unigene52391  | Potri.001G253000.1 | 7.0869  | 63.2247  | -3.1573 | Down | 1.72E-89  | 3.19E-88  |
| Unigene14327  | Potri.006G145200.1 | 8.8196  | 78.6878  | -3.1574 | Down | 1.49E-149 | 5.32E-148 |
| Unigene119240 | Potri.001G029300.1 | 0.408   | 3.6418   | -3.158  | Down | 3.25E-12  | 1.04E-11  |
| Unigene118115 | Potri.016G035900.2 | 2.5598  | 22.8504  | -3.1581 | Down | 8.26E-45  | 7.21E-44  |
| Unigene70987  | Potri.008G068600.1 | 1.299   | 11.5957  | -3.1581 | Down | 3.25E-12  | 1.04E-11  |
| Unigene75316  | Potri.003G107500.1 | 1.1868  | 10.5943  | -3.1581 | Down | 3.25E-12  | 1.04E-11  |
| Unigene111494 | Potri.001G321500.1 | 1.1206  | 10.0032  | -3.1581 | Down | 3.25E-12  | 1.04E-11  |
| Unigene115846 | Potri.002G194100.1 | 0.8674  | 7.7433   | -3.1582 | Down | 3.25E-12  | 1.04E-11  |
| Unigene45723  | Potri.014G152200.1 | 1.296   | 11.5788  | -3.1593 | Down | 5.78E-65  | 7.50E-64  |
| Unigene2351   | Potri.015G147600.1 | 12.9352 | 115.5921 | -3.1597 | Down | 5.19E-227 | 3.14E-225 |
| Unigene21677  | Potri.007G137100.1 | 1.8708  | 16.721   | -3.1599 | Down | 9.29E-252 | 6.45E-250 |
| Unigene102915 | Potri.007G112400.4 | 1.1841  | 10.5885  | -3.1606 | Down | 6.08E-17  | 2.41E-16  |
| Unigene25004  | Potri.006G018500.4 | 3.008   | 26.8982  | -3.1606 | Down | 5.13E-48  | 4.82E-47  |
| Unigene42439  | Potri.006G007600.1 | 4.1384  | 37.0061  | -3.1606 | Down | 0         | 0         |
| Unigene20979  | Potri.005G106400.8 | 2.5118  | 22.4604  | -3.1606 | Down | 1.65E-32  | 1.07E-31  |
| Unigene104814 | Potri.003G093100.1 | 0.7091  | 6.341    | -3.1606 | Down | 6.08E-17  | 2.41E-16  |
| Unigene103733 | Potri.006G040800.4 | 0.4825  | 4.3148   | -3.1607 | Down | 6.08E-17  | 2.41E-16  |

|               |                    |         |          |         |      |           |           |
|---------------|--------------------|---------|----------|---------|------|-----------|-----------|
| Unigene77737  | Potri.007G128200.1 | 15.3681 | 137.4575 | -3.161  | Down | 4.33E-150 | 1.55E-148 |
| Unigene34702  | Potri.005G105700.1 | 8.472   | 75.7761  | -3.161  | Down | 6.17E-232 | 3.83E-230 |
| Unigene90824  | Potri.005G176600.1 | 6.5156  | 58.294   | -3.1614 | Down | 2.06E-108 | 4.87E-107 |
| Unigene67210  | Potri.018G109100.1 | 7.1192  | 63.7194  | -3.1619 | Down | 1.06E-182 | 4.92E-181 |
| Unigene19915  | Potri.010G128600.1 | 1.6663  | 14.9141  | -3.162  | Down | 1.19E-21  | 5.60E-21  |
| Unigene312    | Potri.005G188700.1 | 3.7333  | 33.4158  | -3.162  | Down | 0         | 0         |
| Unigene11030  | Potri.018G015100.1 | 10.1726 | 91.0865  | -3.1625 | Down | 0         | 0         |
| Unigene28161  | Potri.002G137200.6 | 1.2485  | 11.1812  | -3.1628 | Down | 2.39E-26  | 1.30E-25  |
| Unigene30674  | Potri.003G166500.1 | 29.3793 | 263.2094 | -3.1633 | Down | 0         | 0         |
| Unigene49135  | Potri.016G109400.1 | 18.0054 | 161.3534 | -3.1637 | Down | 0         | 0         |
| Unigene43127  | Potri.006G228400.1 | 1.7497  | 15.6791  | -3.1637 | Down | 2.35E-99  | 5.00E-98  |
| Unigene28461  | Potri.007G041100.6 | 2.6556  | 23.799   | -3.1638 | Down | 1.01E-35  | 7.15E-35  |
| Unigene39975  | Potri.001G046100.1 | 1.6425  | 14.727   | -3.1645 | Down | 9.41E-50  | 9.14E-49  |
| Unigene34042  | Potri.001G070300.1 | 3.3784  | 30.2988  | -3.1648 | Down | 1.54E-116 | 3.99E-115 |
| Unigene1480   | Potri.008G142400.4 | 7.2586  | 65.1297  | -3.1656 | Down | 2.22E-214 | 1.25E-212 |
| Unigene115499 | Potri.001G188800.1 | 0.3859  | 3.4642   | -3.1662 | Down | 6.29E-06  | 1.36E-05  |
| Unigene110585 | Potri.011G158500.1 | 0.9947  | 8.93     | -3.1663 | Down | 1.01E-10  | 3.01E-10  |
| Unigene47771  | Potri.008G142700.1 | 0.3749  | 3.3656   | -3.1663 | Down | 1.01E-10  | 3.01E-10  |
| Unigene46432  | Potri.001G467000.1 | 0.538   | 4.83     | -3.1663 | Down | 6.29E-06  | 1.36E-05  |
| Unigene105169 | Potri.001G204200.1 | 1.0127  | 9.0917   | -3.1663 | Down | 3.58E-20  | 1.60E-19  |
| Unigene28076  | Potri.T096400.1    | 1.0742  | 9.6444   | -3.1664 | Down | 1.45E-29  | 8.72E-29  |
| Unigene64044  | Potri.019G079800.1 | 2.5751  | 23.1191  | -3.1664 | Down | 5.87E-53  | 6.09E-52  |
| Unigene102459 | Potri.019G042800.1 | 0.3598  | 3.2303   | -3.1664 | Down | 1.01E-10  | 3.01E-10  |
| Unigene115584 | Potri.017G050100.2 | 0.3819  | 3.4288   | -3.1664 | Down | 6.29E-06  | 1.36E-05  |
| Unigene30962  | Potri.010G191000.3 | 1.2736  | 11.4348  | -3.1664 | Down | 3.00E-34  | 2.04E-33  |
| Unigene3794   | Potri.006G019900.1 | 4.7957  | 43.0556  | -3.1664 | Down | 1.30E-113 | 3.28E-112 |
| Unigene104379 | Potri.005G050500.1 | 1.2163  | 10.9199  | -3.1664 | Down | 1.85E-15  | 6.88E-15  |
| Unigene97556  | Potri.005G027600.2 | 0.3872  | 3.4762   | -3.1664 | Down | 6.29E-06  | 1.35E-05  |
| Unigene22994  | Potri.003G068500.2 | 2.188   | 19.6436  | -3.1664 | Down | 3.00E-34  | 2.04E-33  |
| Unigene103272 | Potri.003G026900.1 | 0.3645  | 3.2724   | -3.1664 | Down | 6.29E-06  | 1.36E-05  |
| Unigene116091 | Potri.001G213500.1 | 0.3645  | 3.2724   | -3.1664 | Down | 6.29E-06  | 1.36E-05  |
| Unigene114744 | Potri.001G186500.1 | 0.4069  | 3.6532   | -3.1664 | Down | 6.29E-06  | 1.36E-05  |
| Unigene113398 | Potri.018G114300.2 | 0.4405  | 3.9552   | -3.1665 | Down | 6.29E-06  | 1.36E-05  |
| Unigene110678 | Potri.010G087600.3 | 0.4973  | 4.465    | -3.1665 | Down | 6.29E-06  | 1.36E-05  |
| Unigene55060  | Potri.010G035300.1 | 0.5458  | 4.9006   | -3.1665 | Down | 6.29E-06  | 1.36E-05  |
| Unigene115672 | Potri.009G147200.1 | 0.378   | 3.394    | -3.1665 | Down | 6.29E-06  | 1.36E-05  |
| Unigene94802  | Potri.009G068100.3 | 0.4287  | 3.8492   | -3.1665 | Down | 6.29E-06  | 1.36E-05  |
| Unigene102094 | Potri.007G068100.1 | 0.3982  | 3.5752   | -3.1665 | Down | 1.01E-10  | 3.01E-10  |
| Unigene110115 | Potri.006G224900.3 | 0.5086  | 4.5665   | -3.1665 | Down | 6.29E-06  | 1.36E-05  |

|               |                     |         |          |         |      |           |           |
|---------------|---------------------|---------|----------|---------|------|-----------|-----------|
| Unigene116128 | Potri.006G044100.1  | 0.3621  | 3.2512   | -3.1665 | Down | 6.29E-06  | 1.36E-05  |
| Unigene116567 | Potri.005G108400.1  | 0.3464  | 3.1103   | -3.1665 | Down | 6.29E-06  | 1.36E-05  |
| Unigene114867 | Potri.004G130600.1  | 0.805   | 7.2276   | -3.1665 | Down | 1.01E-10  | 3.01E-10  |
| Unigene111420 | Potri.003G157900.1  | 0.4823  | 4.3303   | -3.1665 | Down | 6.29E-06  | 1.36E-05  |
| Unigene114468 | Potri.T037000.1     | 0.4144  | 3.7209   | -3.1666 | Down | 6.29E-06  | 1.36E-05  |
| Unigene106985 | Potri.002G160200.1  | 0.4539  | 4.0756   | -3.1666 | Down | 1.01E-10  | 3.01E-10  |
| Unigene21760  | Potri.003G072800.1  | 1.5612  | 14.0247  | -3.1672 | Down | 8.02E-103 | 1.77E-101 |
| Unigene21697  | Potri.008G129400.1  | 2.6551  | 23.8528  | -3.1673 | Down | 3.69E-98  | 7.72E-97  |
| Unigene37313  | Potri.003G073700.1  | 3.5523  | 31.9136  | -3.1673 | Down | 3.69E-98  | 7.72E-97  |
| Unigene80038  | Potri.010G247500.5  | 18.6498 | 167.6017 | -3.1678 | Down | 4.31E-193 | 2.15E-191 |
| Unigene52440  | Potri.006G229200.2  | 8.3602  | 75.1356  | -3.1679 | Down | 8.93E-184 | 4.19E-182 |
| Unigene38466  | Potri.014G082100.1  | 2.1941  | 19.7233  | -3.1682 | Down | 1.72E-51  | 1.74E-50  |
| Unigene36490  | Potri.005G043900.1  | 5.3048  | 47.6864  | -3.1682 | Down | 1.72E-51  | 1.74E-50  |
| Unigene8933   | Potri.001G1313300.1 | 0.9376  | 8.4285   | -3.1682 | Down | 1.72E-51  | 1.74E-50  |
| Unigene28839  | Potri.006G274800.1  | 1.8365  | 16.5107  | -3.1684 | Down | 8.14E-47  | 7.43E-46  |
| Unigene88979  | Potri.001G255800.1  | 15.2442 | 137.0956 | -3.1688 | Down | 2.63E-221 | 1.54E-219 |
| Unigene38901  | Potri.006G270900.1  | 1.5265  | 13.7288  | -3.1689 | Down | 1.84E-37  | 1.36E-36  |
| Unigene18707  | Potri.002G176300.2  | 6.7104  | 60.3717  | -3.1694 | Down | 9.73E-122 | 2.67E-120 |
| Unigene965    | Potri.001G191400.1  | 4.3808  | 39.4435  | -3.1705 | Down | 4.12E-220 | 2.40E-218 |
| Unigene84056  | Potri.002G026200.1  | 20.0739 | 180.7604 | -3.1707 | Down | 1.28E-232 | 7.95E-231 |
| Unigene36546  | Potri.009G125600.1  | 8.2437  | 74.2553  | -3.1711 | Down | 5.80E-97  | 1.19E-95  |
| Unigene113404 | Potri.016G090800.2  | 1.6153  | 14.5553  | -3.1717 | Down | 1.08E-18  | 4.58E-18  |
| Unigene78385  | Potri.008G158200.1  | 1.7385  | 15.6654  | -3.1717 | Down | 1.08E-18  | 4.58E-18  |
| Unigene88442  | Potri.006G240000.1  | 1.2321  | 11.1022  | -3.1717 | Down | 1.08E-18  | 4.58E-18  |
| Unigene50643  | Potri.012G080000.4  | 3.8713  | 34.889   | -3.1719 | Down | 3.67E-100 | 7.88E-99  |
| Unigene10931  | Potri.019G119200.1  | 5.7617  | 51.9467  | -3.1725 | Down | 6.36E-180 | 2.89E-178 |
| Unigene49613  | Potri.009G115900.2  | 1.3346  | 12.0329  | -3.1725 | Down | 2.63E-31  | 1.66E-30  |
| Unigene27489  | Potri.017G057800.1  | 3.8292  | 34.5318  | -3.1728 | Down | 7.05E-44  | 6.03E-43  |
| Unigene37860  | Potri.013G144000.1  | 1.1989  | 10.8117  | -3.1728 | Down | 7.05E-44  | 6.03E-43  |
| Unigene12     | Potri.010G071500.1  | 9.5431  | 86.0611  | -3.1728 | Down | 0         | 0         |
| Unigene1574   | Potri.018G109100.1  | 9.5883  | 86.5004  | -3.1734 | Down | 2.22E-286 | 1.86E-284 |
| Unigene106963 | Potri.001G007300.1  | 0.609   | 5.4947   | -3.1735 | Down | 5.66E-14  | 1.97E-13  |
| Unigene112916 | Potri.019G049800.2  | 1.2032  | 10.8565  | -3.1736 | Down | 5.66E-14  | 1.97E-13  |
| Unigene56204  | Potri.001G472400.1  | 1.0115  | 9.1268   | -3.1736 | Down | 5.66E-14  | 1.97E-13  |
| Unigene116010 | Potri.012G121900.1  | 0.9783  | 8.8276   | -3.1737 | Down | 5.66E-14  | 1.97E-13  |
| Unigene48504  | Potri.001G100800.2  | 26.3785 | 238.034  | -3.1737 | Down | 2.14E-247 | 1.45E-245 |
| Unigene87389  | Potri.007G128200.1  | 29.366  | 265.0948 | -3.1743 | Down | 0         | 0         |
| Unigene18220  | Potri.011G011500.1  | 1.782   | 16.0873  | -3.1744 | Down | 4.38E-47  | 4.03E-46  |
| Unigene106569 | Potri.001G012300.1  | 0.7362  | 6.6472   | -3.1746 | Down | 1.61E-34  | 1.10E-33  |

|               |                    |         |          |         |      |           |           |
|---------------|--------------------|---------|----------|---------|------|-----------|-----------|
| Unigene31603  | Potri.006G051100.1 | 11.8762 | 107.2463 | -3.1748 | Down | 0         | 0         |
| Unigene34882  | Potri.018G014600.1 | 2.9538  | 26.6773  | -3.175  | Down | 4.83E-149 | 1.72E-147 |
| Unigene42654  | Potri.008G049500.4 | 2.6942  | 24.3524  | -3.1761 | Down | 1.52E-122 | 4.20E-121 |
| Unigene19970  | Potri.011G068600.6 | 0.9335  | 8.4393   | -3.1764 | Down | 9.92E-38  | 7.37E-37  |
| Unigene116125 | Potri.017G007300.1 | 0.6036  | 5.4621   | -3.1778 | Down | 3.18E-09  | 8.68E-09  |
| Unigene4713   | Potri.015G074600.5 | 0.4686  | 4.2406   | -3.1778 | Down | 3.18E-09  | 8.67E-09  |
| Unigene118096 | Potri.013G008600.1 | 0.4594  | 4.1571   | -3.1778 | Down | 3.18E-09  | 8.68E-09  |
| Unigene117145 | Potri.001G376500.2 | 0.5375  | 4.8639   | -3.1778 | Down | 3.18E-09  | 8.68E-09  |
| Unigene8043   | Potri.009G110300.1 | 3.5788  | 32.3881  | -3.1779 | Down | 1.93E-72  | 2.81E-71  |
| Unigene116175 | Potri.005G046700.4 | 0.6016  | 5.4444   | -3.1779 | Down | 3.18E-09  | 8.68E-09  |
| Unigene106991 | Potri.004G028300.1 | 0.496   | 4.4888   | -3.1779 | Down | 4.77E-33  | 3.15E-32  |
| Unigene82418  | Potri.003G204300.3 | 25.0093 | 226.3305 | -3.1779 | Down | 1.11E-276 | 8.79E-275 |
| Unigene119418 | Potri.001G319000.3 | 0.979   | 8.8597   | -3.1779 | Down | 4.77E-33  | 3.15E-32  |
| Unigene112062 | Potri.001G124000.2 | 0.7803  | 7.0618   | -3.1779 | Down | 3.18E-09  | 8.68E-09  |
| Unigene15640  | Potri.004G096000.1 | 14.2889 | 129.3524 | -3.1783 | Down | 8.19E-123 | 2.27E-121 |
| Unigene34920  | Potri.001G200400.1 | 10.2982 | 93.2243  | -3.1783 | Down | 1.14E-130 | 3.40E-129 |
| Unigene35650  | Potri.013G058300.7 | 2.2668  | 20.5366  | -3.1795 | Down | 2.93E-36  | 2.10E-35  |
| Unigene16548  | Potri.015G130700.4 | 1.3607  | 12.3315  | -3.1799 | Down | 2.32E-28  | 1.34E-27  |
| Unigene19777  | Potri.008G094200.2 | 1.1979  | 10.8585  | -3.1802 | Down | 2.36E-47  | 2.18E-46  |
| Unigene26121  | Potri.011G137800.1 | 1.448   | 13.1261  | -3.1803 | Down | 2.36E-47  | 2.18E-46  |
| Unigene44067  | Potri.005G189800.1 | 2.9986  | 27.1841  | -3.1804 | Down | 2.62E-66  | 3.48E-65  |
| Unigene43019  | Potri.010G079400.1 | 2.5774  | 23.3671  | -3.1805 | Down | 3.05E-85  | 5.37E-84  |
| Unigene50899  | Potri.001G161400.5 | 2.5577  | 23.1926  | -3.1807 | Down | 1.81E-39  | 1.40E-38  |
| Unigene41410  | Potri.001G411100.2 | 1.1325  | 10.2726  | -3.1812 | Down | 1.47E-50  | 1.45E-49  |
| Unigene20255  | Potri.002G161600.1 | 4.2974  | 39.0165  | -3.1825 | Down | 2.30E-164 | 9.34E-163 |
| Unigene118126 | Potri.T161800.1    | 0.6384  | 5.7969   | -3.1827 | Down | 1.74E-12  | 5.67E-12  |
| Unigene9975   | Potri.001G224700.1 | 0.7418  | 6.7356   | -3.1827 | Down | 1.74E-12  | 5.67E-12  |
| Unigene30122  | Potri.009G115400.5 | 5.0923  | 46.2415  | -3.1828 | Down | 2.37E-123 | 6.61E-122 |
| Unigene47060  | Potri.001G099400.2 | 0.6817  | 6.1904   | -3.1828 | Down | 1.74E-12  | 5.67E-12  |
| Unigene86947  | Potri.016G037600.1 | 84.7717 | 770.4339 | -3.184  | Down | 0         | 0         |
| Unigene16605  | Potri.008G045300.4 | 6.3013  | 57.2667  | -3.184  | Down | 8.99E-100 | 1.92E-98  |
| Unigene87200  | Potri.017G089800.5 | 15.3024 | 139.1026 | -3.1843 | Down | 3.61E-204 | 1.92E-202 |
| Unigene18900  | Potri.004G165300.1 | 3.8586  | 35.0754  | -3.1843 | Down | 1.20E-77  | 1.91E-76  |
| Unigene118508 | Potri.002G171900.1 | 0.7477  | 6.802    | -3.1854 | Down | 9.94E-16  | 3.74E-15  |
| Unigene74346  | Potri.017G058300.3 | 4.6841  | 42.615   | -3.1855 | Down | 2.04E-44  | 1.77E-43  |
| Unigene107016 | Potri.005G004600.1 | 0.9197  | 8.3673   | -3.1855 | Down | 2.04E-44  | 1.77E-43  |
| Unigene42059  | Potri.001G273000.1 | 1.1079  | 10.0795  | -3.1855 | Down | 9.94E-16  | 3.74E-15  |
| Unigene106283 | Potri.001G126100.1 | 0.6382  | 5.8062   | -3.1855 | Down | 9.94E-16  | 3.74E-15  |
| Unigene36760  | Potri.005G133100.1 | 0.9591  | 8.7259   | -3.1856 | Down | 9.94E-16  | 3.74E-15  |

|               |                    |         |          |         |      |           |           |
|---------------|--------------------|---------|----------|---------|------|-----------|-----------|
| Unigene10610  | Potri.004G232400.1 | 6.0996  | 55.4945  | -3.1856 | Down | 0         | 0         |
| Unigene417    | Potri.015G003700.2 | 10.6399 | 96.8244  | -3.1859 | Down | 0         | 0         |
| Unigene30554  | Potri.006G204200.1 | 7.3045  | 66.473   | -3.1859 | Down | 3.51E-76  | 5.44E-75  |
| Unigene6089   | Potri.001G375800.1 | 30.8234 | 280.5016 | -3.1859 | Down | 0         | 0         |
| Unigene32946  | Potri.009G141700.1 | 6.5484  | 59.6005  | -3.1861 | Down | 8.83E-200 | 4.60E-198 |
| Unigene23947  | Potri.017G044600.5 | 0.9829  | 8.9477   | -3.1864 | Down | 2.57E-33  | 1.71E-32  |
| Unigene119118 | Potri.005G034200.1 | 1.2774  | 11.6289  | -3.1864 | Down | 2.57E-33  | 1.71E-32  |
| Unigene83710  | Potri.019G131300.1 | 16.0443 | 146.1146 | -3.187  | Down | 2.86E-187 | 1.38E-185 |
| Unigene22690  | Potri.005G043500.1 | 1.0845  | 9.8781   | -3.1872 | Down | 4.92E-54  | 5.22E-53  |
| Unigene19839  | Potri.001G351200.2 | 17.7532 | 161.7068 | -3.1872 | Down | 8.84E-159 | 3.41E-157 |
| Unigene106134 | Potri.017G033900.1 | 0.6628  | 6.0375   | -3.1873 | Down | 5.80E-19  | 2.49E-18  |
| Unigene4786   | Potri.019G010700.4 | 0.7152  | 6.5197   | -3.1884 | Down | 3.44E-22  | 1.64E-21  |
| Unigene23450  | Potri.001G236800.1 | 0.9289  | 8.4681   | -3.1884 | Down | 3.44E-22  | 1.64E-21  |
| Unigene9741   | Potri.008G020900.1 | 0.9936  | 9.0581   | -3.1885 | Down | 6.01E-43  | 5.04E-42  |
| Unigene38877  | Potri.011G152400.2 | 3.0717  | 28.0115  | -3.1889 | Down | 3.73E-46  | 3.36E-45  |
| Unigene44004  | Potri.006G107700.1 | 1.1819  | 10.7792  | -3.1891 | Down | 4.77E-70  | 6.71E-69  |
| Unigene37413  | Potri.010G221100.1 | 1.743   | 15.8988  | -3.1893 | Down | 2.06E-25  | 1.09E-24  |
| Unigene105749 | Potri.004G211800.1 | 0.9202  | 8.3939   | -3.1893 | Down | 2.06E-25  | 1.09E-24  |
| Unigene17037  | Potri.001G247400.1 | 4.8424  | 44.1802  | -3.1896 | Down | 3.19E-178 | 1.44E-176 |
| Unigene16055  | Potri.013G135100.4 | 1.6687  | 15.2281  | -3.1899 | Down | 1.25E-28  | 7.28E-28  |
| Unigene42362  | Potri.018G019700.1 | 1.3434  | 12.2599  | -3.19   | Down | 1.25E-28  | 7.28E-28  |
| Unigene8312   | Potri.017G139800.1 | 1.0848  | 9.9002   | -3.19   | Down | 9.03E-56  | 9.92E-55  |
| Unigene64741  | Potri.015G146100.2 | 1.7     | 15.5139  | -3.19   | Down | 1.25E-28  | 7.28E-28  |
| Unigene11151  | Potri.001G288800.1 | 3.232   | 29.5037  | -3.1904 | Down | 1.69E-119 | 4.54E-118 |
| Unigene48115  | Potri.017G078100.5 | 8.5043  | 77.6378  | -3.1905 | Down | 1.89E-92  | 3.66E-91  |
| Unigene63824  | Potri.001G047500.1 | 2.3862  | 21.7839  | -3.1905 | Down | 7.61E-32  | 4.86E-31  |
| Unigene40297  | Potri.005G077700.2 | 0.6046  | 5.5223   | -3.1912 | Down | 2.87E-38  | 2.16E-37  |
| Unigene58314  | Potri.007G141100.1 | 11.833  | 108.0843 | -3.1913 | Down | 2.88E-148 | 1.02E-146 |
| Unigene32022  | Potri.002G103300.1 | 8.1586  | 74.5429  | -3.1917 | Down | 0         | 0         |
| Unigene6162   | Potri.001G017300.3 | 6.9216  | 63.2813  | -3.1926 | Down | 1.44E-116 | 3.73E-115 |
| Unigene13750  | Potri.T127900.1    | 1.1728  | 10.7299  | -3.1936 | Down | 4.08E-99  | 8.67E-98  |
| Unigene31112  | Potri.005G231300.1 | 13.9993 | 128.0968 | -3.1938 | Down | 8.36E-235 | 5.26E-233 |
| Unigene22978  | Potri.003G167100.1 | 9.9545  | 91.0951  | -3.194  | Down | 2.75E-134 | 8.53E-133 |
| Unigene109640 | Potri.019G031400.1 | 0.3454  | 3.1627   | -3.1948 | Down | 2.17E-04  | 4.01E-04  |
| Unigene117043 | Potri.018G019900.1 | 0.4363  | 3.995    | -3.1948 | Down | 1.02E-07  | 2.52E-07  |
| Unigene115728 | Potri.010G068900.1 | 0.5024  | 4.6003   | -3.1948 | Down | 1.02E-07  | 2.52E-07  |
| Unigene118677 | Potri.006G205500.1 | 0.4752  | 4.3513   | -3.1948 | Down | 5.42E-11  | 1.64E-10  |
| Unigene116271 | Potri.001G442600.4 | 0.4752  | 4.3513   | -3.1948 | Down | 1.02E-07  | 2.52E-07  |
| Unigene106047 | Potri.012G084800.4 | 0.4767  | 4.3652   | -3.1949 | Down | 1.02E-07  | 2.52E-07  |

|               |                     |         |          |         |      |           |           |
|---------------|---------------------|---------|----------|---------|------|-----------|-----------|
| Unigene107250 | Potri.011G069700.2  | 0.373   | 3.4157   | -3.1949 | Down | 2.17E-04  | 4.01E-04  |
| Unigene117956 | Potri.008G111700.2  | 0.5666  | 5.1885   | -3.1949 | Down | 5.42E-11  | 1.64E-10  |
| Unigene108469 | Potri.005G047400.1  | 0.3604  | 3.3002   | -3.1949 | Down | 2.17E-04  | 4.01E-04  |
| Unigene117405 | Potri.001G395900.1  | 0.6217  | 5.6929   | -3.1949 | Down | 5.42E-11  | 1.64E-10  |
| Unigene102822 | Potri.001G013700.1  | 0.7005  | 6.4145   | -3.1949 | Down | 1.02E-07  | 2.52E-07  |
| Unigene19297  | Potri.T023200.2     | 0.4275  | 3.9149   | -3.195  | Down | 3.04E-14  | 1.07E-13  |
| Unigene113578 | Potri.019G030300.2  | 0.8742  | 8.0056   | -3.195  | Down | 5.42E-11  | 1.64E-10  |
| Unigene105884 | Potri.016G037400.1  | 0.5235  | 4.794    | -3.195  | Down | 1.02E-07  | 2.52E-07  |
| Unigene41569  | Potri.011G078200.1  | 0.9267  | 8.4863   | -3.195  | Down | 1.03E-20  | 4.71E-20  |
| Unigene60377  | Potri.008G054400.1  | 1.6299  | 14.9259  | -3.195  | Down | 3.23E-43  | 2.73E-42  |
| Unigene3420   | Potri.007G032500.10 | 2.2158  | 20.2915  | -3.195  | Down | 1.03E-20  | 4.71E-20  |
| Unigene48649  | Potri.007G018100.4  | 0.4558  | 4.174    | -3.195  | Down | 5.42E-11  | 1.64E-10  |
| Unigene36633  | Potri.006G035200.1  | 0.3975  | 3.6402   | -3.195  | Down | 5.42E-11  | 1.64E-10  |
| Unigene40781  | Potri.004G211700.1  | 2.0345  | 18.6313  | -3.195  | Down | 1.03E-20  | 4.71E-20  |
| Unigene106539 | Potri.003G087800.3  | 0.3702  | 3.3903   | -3.195  | Down | 1.02E-07  | 2.52E-07  |
| Unigene9894   | Potri.002G234700.6  | 0.9564  | 8.7583   | -3.195  | Down | 3.04E-14  | 1.07E-13  |
| Unigene74164  | Potri.001G438100.1  | 0.3486  | 3.1923   | -3.195  | Down | 2.17E-04  | 4.01E-04  |
| Unigene113058 | Potri.001G085200.1  | 0.5968  | 5.4652   | -3.195  | Down | 1.02E-07  | 2.52E-07  |
| Unigene110835 | Potri.T103400.1     | 0.3286  | 3.0095   | -3.1951 | Down | 2.17E-04  | 4.01E-04  |
| Unigene100688 | Potri.014G024700.1  | 0.3855  | 3.5305   | -3.1951 | Down | 1.02E-07  | 2.52E-07  |
| Unigene107453 | Potri.011G156500.1  | 0.3711  | 3.3987   | -3.1951 | Down | 2.17E-04  | 4.01E-04  |
| Unigene108773 | Potri.011G001000.6  | 0.3552  | 3.2531   | -3.1951 | Down | 2.17E-04  | 4.01E-04  |
| Unigene105317 | Potri.010G114800.4  | 0.5553  | 5.0855   | -3.1951 | Down | 5.42E-11  | 1.64E-10  |
| Unigene37085  | Potri.009G001500.2  | 0.4774  | 4.3722   | -3.1951 | Down | 3.04E-14  | 1.07E-13  |
| Unigene110289 | Potri.006G244700.1  | 0.336   | 3.0772   | -3.1951 | Down | 2.17E-04  | 4.01E-04  |
| Unigene103613 | Potri.005G036600.1  | 0.4721  | 4.3237   | -3.1951 | Down | 1.02E-07  | 2.52E-07  |
| Unigene102768 | Potri.004G175600.1  | 0.336   | 3.0772   | -3.1951 | Down | 2.17E-04  | 4.01E-04  |
| Unigene108768 | Potri.004G054500.1  | 0.3552  | 3.2531   | -3.1951 | Down | 2.17E-04  | 4.01E-04  |
| Unigene103488 | Potri.003G130300.1  | 0.6131  | 5.6149   | -3.1951 | Down | 5.42E-11  | 1.64E-10  |
| Unigene114087 | Potri.002G124800.1  | 0.5651  | 5.1754   | -3.1951 | Down | 1.02E-07  | 2.52E-07  |
| Unigene109281 | Potri.001G449100.4  | 0.3502  | 3.2073   | -3.1951 | Down | 2.17E-04  | 4.01E-04  |
| Unigene90894  | Potri.001G060100.2  | 16.0257 | 146.9082 | -3.1965 | Down | 2.10E-275 | 1.65E-273 |
| Unigene84133  | Potri.005G207200.1  | 35.2724 | 323.52   | -3.1972 | Down | 0         | 0         |
| Unigene9437   | Potri.010G062700.1  | 3.1835  | 29.21    | -3.1978 | Down | 6.40E-98  | 1.33E-96  |
| Unigene54939  | Potri.017G129100.8  | 3.3252  | 30.5283  | -3.1986 | Down | 1.54E-38  | 1.17E-37  |
| Unigene36066  | Potri.005G044700.1  | 1.1108  | 10.2038  | -3.1994 | Down | 4.09E-32  | 2.63E-31  |
| Unigene32231  | Potri.014G158400.2  | 3.4878  | 32.0438  | -3.1997 | Down | 3.52E-175 | 1.54E-173 |
| Unigene26628  | Potri.011G055600.1  | 3.1159  | 28.6332  | -3.2    | Down | 2.61E-56  | 2.89E-55  |
| Unigene48570  | Potri.008G200200.2  | 3.7406  | 34.428   | -3.2022 | Down | 4.78E-58  | 5.48E-57  |



|               |                     |         |          |         |      |           |           |
|---------------|---------------------|---------|----------|---------|------|-----------|-----------|
| Unigene12833  | Potri.001G468500.1  | 8.2976  | 76.3689  | -3.2022 | Down | 8.62E-171 | 3.66E-169 |
| Unigene107523 | Potri.011G135000.1  | 2.0413  | 18.7931  | -3.2026 | Down | 3.11E-19  | 1.35E-18  |
| Unigene38344  | Potri.008G189200.1  | 0.9677  | 8.909    | -3.2026 | Down | 3.11E-19  | 1.35E-18  |
| Unigene54796  | Potri.012G034300.1  | 0.7612  | 7.0082   | -3.2027 | Down | 3.11E-19  | 1.35E-18  |
| Unigene40360  | Potri.002G038800.3  | 1.1525  | 10.6107  | -3.2027 | Down | 3.11E-19  | 1.35E-18  |
| Unigene77316  | Potri.001G146200.10 | 7.1356  | 65.6941  | -3.2027 | Down | 1.36E-72  | 1.99E-71  |
| Unigene89138  | Potri.010G178100.1  | 16.7795 | 154.5231 | -3.2031 | Down | 1.16E-254 | 8.20E-253 |
| Unigene22863  | Potri.003G187400.1  | 1.6082  | 14.811   | -3.2032 | Down | 1.23E-51  | 1.24E-50  |
| Unigene111344 | Potri.006G151100.2  | 1.447   | 13.3373  | -3.2043 | Down | 5.33E-16  | 2.03E-15  |
| Unigene94788  | Potri.007G022000.1  | 1.3843  | 12.7598  | -3.2044 | Down | 1.21E-30  | 7.49E-30  |
| Unigene106712 | Potri.019G034500.3  | 0.8934  | 8.2416   | -3.2055 | Down | 1.99E-27  | 1.12E-26  |
| Unigene15430  | Potri.018G021100.2  | 2.0162  | 18.5992  | -3.2055 | Down | 1.99E-27  | 1.12E-26  |
| Unigene110911 | Potri.016G021300.1  | 26.4547 | 244.1207 | -3.206  | Down | 7.36E-262 | 5.41E-260 |
| Unigene319    | Potri.015G037400.1  | 3.493   | 32.2332  | -3.206  | Down | 1.41E-187 | 6.80E-186 |
| Unigene387    | Potri.006G123900.1  | 1.89    | 17.4475  | -3.2066 | Down | 1.13E-166 | 4.68E-165 |
| Unigene32121  | Potri.007G003100.2  | 11.6716 | 107.767  | -3.2068 | Down | 0         | 0         |
| Unigene25826  | Potri.003G082300.1  | 8.434   | 77.8748  | -3.2069 | Down | 2.22E-231 | 1.37E-229 |
| Unigene41932  | Potri.016G065300.3  | 7.5559  | 69.775   | -3.207  | Down | 1.16E-103 | 2.59E-102 |
| Unigene50603  | Potri.014G123700.1  | 1.2675  | 11.7044  | -3.207  | Down | 1.34E-35  | 9.46E-35  |
| Unigene9644   | Potri.005G241800.1  | 3.161   | 29.2194  | -3.2085 | Down | 9.84E-83  | 1.67E-81  |
| Unigene1623   | Potri.016G056600.5  | 4.2298  | 39.1081  | -3.2088 | Down | 7.23E-91  | 1.37E-89  |
| Unigene105834 | Potri.006G241300.3  | 0.8445  | 7.8096   | -3.2091 | Down | 5.54E-21  | 2.55E-20  |
| Unigene21340  | Potri.004G169300.1  | 2.9744  | 27.5145  | -3.2095 | Down | 7.75E-143 | 2.59E-141 |
| Unigene49395  | Potri.008G193000.1  | 10.7595 | 99.5798  | -3.2102 | Down | 3.86E-172 | 1.65E-170 |
| Unigene50393  | Potri.002G185100.1  | 7.6558  | 70.8756  | -3.2107 | Down | 2.25E-141 | 7.46E-140 |
| Unigene92465  | Potri.017G089800.5  | 23.4388 | 217.0337 | -3.2109 | Down | 0         | 0         |
| Unigene24639  | Potri.005G215900.1  | 0.7401  | 6.857    | -3.2118 | Down | 1.70E-09  | 4.71E-09  |
| Unigene74052  | Potri.009G027300.5  | 9.2377  | 85.6283  | -3.2125 | Down | 6.14E-88  | 1.12E-86  |
| Unigene36911  | Potri.001G253300.2  | 1.7633  | 16.3663  | -3.2144 | Down | 9.90E-23  | 4.82E-22  |
| Unigene33196  | Potri.005G232900.1  | 4.9859  | 46.3048  | -3.2152 | Down | 1.37E-130 | 4.09E-129 |
| Unigene92055  | Potri.010G249700.1  | 22.9726 | 213.434  | -3.2158 | Down | 0         | 0         |
| Unigene105931 | Potri.005G241100.4  | 0.4892  | 4.5455   | -3.2159 | Down | 1.63E-14  | 5.80E-14  |
| Unigene42154  | Potri.005G069000.1  | 0.6537  | 6.074    | -3.2159 | Down | 1.07E-27  | 6.08E-27  |
| Unigene14977  | Potri.007G051900.1  | 1.3381  | 12.434   | -3.216  | Down | 1.63E-14  | 5.80E-14  |
| Unigene97005  | Potri.017G086000.1  | 0.5445  | 5.0598   | -3.2161 | Down | 1.63E-14  | 5.80E-14  |
| Unigene14973  | Potri.008G069900.1  | 0.4388  | 4.0776   | -3.2161 | Down | 1.63E-14  | 5.80E-14  |
| Unigene106610 | Potri.010G093000.1  | 0.3772  | 3.5054   | -3.2162 | Down | 1.63E-14  | 5.80E-14  |
| Unigene33846  | Potri.004G208100.2  | 2.7811  | 25.8501  | -3.2164 | Down | 5.22E-85  | 9.18E-84  |
| Unigene39967  | Potri.006G060000.1  | 1.9875  | 18.4866  | -3.2175 | Down | 1.04E-50  | 1.03E-49  |

|               |                     |         |          |         |      |           |           |
|---------------|---------------------|---------|----------|---------|------|-----------|-----------|
| Unigene33168  | Potri.001G016300.1  | 1.1383  | 10.588   | -3.2175 | Down | 1.04E-50  | 1.03E-49  |
| Unigene106002 | Potri.011G125100.1  | 0.4879  | 4.5394   | -3.2178 | Down | 1.67E-19  | 7.29E-19  |
| Unigene118955 | Potri.002G008700.1  | 0.7727  | 7.1894   | -3.2179 | Down | 1.67E-19  | 7.29E-19  |
| Unigene117109 | Potri.007G003100.7  | 2.7029  | 25.1594  | -3.2185 | Down | 1.47E-42  | 1.22E-41  |
| Unigene17795  | Potri.001G103400.1  | 1.3189  | 12.2772  | -3.2186 | Down | 1.47E-42  | 1.22E-41  |
| Unigene8306   | Potri.011G154200.1  | 1.8406  | 17.1472  | -3.2197 | Down | 2.17E-57  | 2.45E-56  |
| Unigene106329 | Potri.007G024100.1  | 1.2078  | 11.2519  | -3.2197 | Down | 1.93E-29  | 1.15E-28  |
| Unigene32545  | Potri.010G092400.1  | 1.6979  | 15.8244  | -3.2203 | Down | 5.18E-105 | 1.17E-103 |
| Unigene26572  | Potri.018G130800.1  | 12.1351 | 113.1241 | -3.2206 | Down | 1.64E-157 | 6.27E-156 |
| Unigene22059  | Potri.008G129400.2  | 2.2387  | 20.8904  | -3.2221 | Down | 1.76E-108 | 4.18E-107 |
| Unigene11989  | Potri.013G047900.2  | 4.2399  | 39.5679  | -3.2222 | Down | 2.83E-123 | 7.88E-122 |
| Unigene122    | Potri.016G032000.3  | 3.0209  | 28.2005  | -3.2227 | Down | 5.90E-281 | 4.75E-279 |
| Unigene99108  | Potri.017G050200.1  | 0.4223  | 3.9427   | -3.2228 | Down | 3.35E-06  | 7.39E-06  |
| Unigene115489 | Potri.011G129300.1  | 0.3859  | 3.6028   | -3.2228 | Down | 3.35E-06  | 7.39E-06  |
| Unigene100427 | Potri.001G289300.1  | 0.4803  | 4.4842   | -3.2228 | Down | 3.35E-06  | 7.40E-06  |
| Unigene115493 | Potri.001G065800.3  | 0.3859  | 3.6028   | -3.2228 | Down | 3.35E-06  | 7.39E-06  |
| Unigene96475  | Potri.T144600.1     | 0.7338  | 6.8512   | -3.2229 | Down | 2.90E-11  | 8.87E-11  |
| Unigene63341  | Potri.012G017200.3  | 1.5054  | 14.0558  | -3.2229 | Down | 2.85E-16  | 1.10E-15  |
| Unigene104855 | Potri.011G056800.1  | 0.7925  | 7.3995   | -3.2229 | Down | 3.19E-26  | 1.73E-25  |
| Unigene98397  | Potri.005G203100.10 | 0.5157  | 4.8148   | -3.2229 | Down | 3.35E-06  | 7.39E-06  |
| Unigene5847   | Potri.004G230300.1  | 0.9816  | 9.165    | -3.2229 | Down | 2.90E-11  | 8.87E-11  |
| Unigene104930 | Potri.002G156900.1  | 0.5724  | 5.3443   | -3.2229 | Down | 2.90E-11  | 8.87E-11  |
| Unigene114931 | Potri.001G317100.1  | 0.4011  | 3.7449   | -3.2229 | Down | 3.35E-06  | 7.40E-06  |
| Unigene96492  | Potri.001G254000.1  | 0.353   | 3.2959   | -3.2229 | Down | 3.35E-06  | 7.39E-06  |
| Unigene104351 | Potri.T157200.1     | 1.2774  | 11.9271  | -3.223  | Down | 3.19E-26  | 1.73E-25  |
| Unigene97997  | Potri.018G106400.2  | 0.3443  | 3.2148   | -3.223  | Down | 3.35E-06  | 7.39E-06  |
| Unigene30612  | Potri.017G114600.5  | 2.0532  | 19.1709  | -3.223  | Down | 4.33E-41  | 3.49E-40  |
| Unigene115064 | Potri.010G029400.1  | 0.3968  | 3.705    | -3.223  | Down | 3.35E-06  | 7.40E-06  |
| Unigene94530  | Potri.008G146400.1  | 0.3793  | 3.5417   | -3.223  | Down | 3.35E-06  | 7.39E-06  |
| Unigene113195 | Potri.006G222800.4  | 0.4458  | 4.1626   | -3.223  | Down | 3.35E-06  | 7.40E-06  |
| Unigene104305 | Potri.005G139500.1  | 1.2189  | 11.3814  | -3.223  | Down | 3.19E-26  | 1.73E-25  |
| Unigene40869  | Potri.005G105900.1  | 0.8248  | 7.7013   | -3.223  | Down | 3.49E-31  | 2.19E-30  |
| Unigene45049  | Potri.001G334700.1  | 2.3558  | 21.9961  | -3.223  | Down | 9.66E-71  | 1.37E-69  |
| Unigene45466  | Potri.T023200.2     | 0.8466  | 7.9053   | -3.2231 | Down | 3.49E-31  | 2.19E-30  |
| Unigene36851  | Potri.017G034600.1  | 0.504   | 4.7064   | -3.2231 | Down | 3.35E-06  | 7.39E-06  |
| Unigene116554 | Potri.012G084800.4  | 0.3464  | 3.2347   | -3.2231 | Down | 3.35E-06  | 7.39E-06  |
| Unigene96367  | Potri.009G106200.1  | 0.444   | 4.1461   | -3.2231 | Down | 3.35E-06  | 7.39E-06  |
| Unigene109292 | Potri.006G123900.1  | 0.5253  | 4.9052   | -3.2231 | Down | 3.35E-06  | 7.40E-06  |
| Unigene95047  | Potri.001G391400.4  | 0.4721  | 4.4085   | -3.2231 | Down | 3.35E-06  | 7.39E-06  |

|               |                    |         |          |         |      |           |           |
|---------------|--------------------|---------|----------|---------|------|-----------|-----------|
| Unigene114777 | Potri.001G309900.1 | 0.4054  | 3.7856   | -3.2231 | Down | 3.35E-06  | 7.40E-06  |
| Unigene5559   | Potri.001G092900.1 | 0.5121  | 4.7818   | -3.2231 | Down | 2.90E-11  | 8.87E-11  |
| Unigene105519 | Potri.006G095800.3 | 0.3586  | 3.3488   | -3.2232 | Down | 3.35E-06  | 7.40E-06  |
| Unigene22261  | Potri.002G230000.3 | 5.378   | 50.2812  | -3.2249 | Down | 0         | 0         |
| Unigene51389  | Potri.016G133500.1 | 12.2318 | 114.3733 | -3.225  | Down | 3.87E-135 | 1.21E-133 |
| Unigene84035  | Potri.001G375800.1 | 19.1245 | 178.8607 | -3.2253 | Down | 5.75E-234 | 3.60E-232 |
| Unigene19682  | Potri.008G067500.5 | 8.4181  | 78.7483  | -3.2257 | Down | 0         | 0         |
| Unigene98453  | Potri.005G245200.1 | 1.0546  | 9.8669   | -3.2259 | Down | 6.31E-33  | 4.15E-32  |
| Unigene28457  | Potri.010G102600.1 | 7.2703  | 68.0254  | -3.226  | Down | 2.15E-153 | 7.95E-152 |
| Unigene5413   | Potri.006G088900.1 | 12.7989 | 119.7677 | -3.2261 | Down | 1.67E-232 | 1.03E-230 |
| Unigene30373  | Potri.013G126900.1 | 2.7251  | 25.5057  | -3.2264 | Down | 5.73E-28  | 3.28E-27  |
| Unigene31800  | Potri.011G005900.1 | 1.9979  | 18.7017  | -3.2266 | Down | 0         | 0         |
| Unigene49422  | Potri.007G043700.1 | 1.6718  | 15.6517  | -3.2268 | Down | 1.63E-49  | 1.58E-48  |
| Unigene99734  | Potri.001G405700.2 | 0.9747  | 9.1275   | -3.2272 | Down | 1.44E-44  | 1.25E-43  |
| Unigene78868  | Potri.006G139000.1 | 10.3003 | 96.5117  | -3.228  | Down | 9.36E-111 | 2.28E-109 |
| Unigene23407  | Potri.001G466800.1 | 1.4279  | 13.3795  | -3.2281 | Down | 3.40E-56  | 3.77E-55  |
| Unigene115538 | Potri.019G006800.2 | 1.2818  | 12.0141  | -3.2285 | Down | 5.03E-18  | 2.08E-17  |
| Unigene114973 | Potri.005G111700.1 | 1.3321  | 12.4861  | -3.2285 | Down | 5.03E-18  | 2.08E-17  |
| Unigene98216  | Potri.003G093700.1 | 0.5634  | 5.2811   | -3.2286 | Down | 5.03E-18  | 2.08E-17  |
| Unigene19588  | Potri.008G111200.1 | 4.9733  | 46.6316  | -3.229  | Down | 1.48E-107 | 3.45E-106 |
| Unigene23992  | Potri.T156000.1    | 2.453   | 23.0074  | -3.2295 | Down | 6.23E-58  | 7.14E-57  |
| Unigene21371  | Potri.003G034700.1 | 7.6595  | 71.8432  | -3.2295 | Down | 0         | 0         |
| Unigene70004  | Potri.015G028700.1 | 2.2001  | 20.6396  | -3.2298 | Down | 2.72E-109 | 6.51E-108 |
| Unigene46311  | Potri.001G204200.1 | 2.9648  | 27.8205  | -3.2301 | Down | 5.45E-53  | 5.66E-52  |
| Unigene2072   | Potri.003G121700.1 | 2.2579  | 21.192   | -3.2305 | Down | 7.97E-88  | 1.45E-86  |
| Unigene47329  | Potri.019G119900.4 | 1.1553  | 10.8464  | -3.2309 | Down | 5.00E-13  | 1.67E-12  |
| Unigene9764   | Potri.013G077700.4 | 0.8866  | 8.3236   | -3.2309 | Down | 9.50E-25  | 4.93E-24  |
| Unigene22896  | Potri.013G047900.1 | 5.2011  | 48.8306  | -3.2309 | Down | 1.09E-117 | 2.85E-116 |
| Unigene9102   | Potri.005G044000.1 | 2.0033  | 18.8079  | -3.2309 | Down | 2.07E-36  | 1.49E-35  |
| Unigene118017 | Potri.001G467300.1 | 0.6527  | 6.1282   | -3.231  | Down | 5.00E-13  | 1.67E-12  |
| Unigene37573  | Potri.014G086300.7 | 6.0628  | 56.9409  | -3.2314 | Down | 5.91E-78  | 9.39E-77  |
| Unigene89888  | Potri.007G091100.1 | 29.5754 | 277.7926 | -3.2315 | Down | 0         | 0         |
| Unigene35923  | Potri.002G072900.2 | 3.9919  | 37.4972  | -3.2316 | Down | 9.97E-55  | 1.07E-53  |
| Unigene12314  | Potri.017G076800.1 | 8.6925  | 81.6587  | -3.2318 | Down | 0         | 0         |
| Unigene21503  | Potri.010G222700.1 | 21.9599 | 206.3188 | -3.2319 | Down | 0         | 0         |
| Unigene10681  | Potri.015G131800.1 | 1.4105  | 13.2544  | -3.2322 | Down | 2.09E-61  | 2.55E-60  |
| Unigene12325  | Potri.019G078500.1 | 0.8392  | 7.8863   | -3.2323 | Down | 1.87E-31  | 1.18E-30  |
| Unigene12039  | Potri.019G002200.1 | 2.0332  | 19.1106  | -3.2325 | Down | 8.75E-50  | 8.50E-49  |
| Unigene40868  | Potri.013G085700.5 | 1.2321  | 11.5849  | -3.2331 | Down | 8.93E-20  | 3.94E-19  |

|               |                     |         |          |         |      |           |           |
|---------------|---------------------|---------|----------|---------|------|-----------|-----------|
| Unigene104669 | Potri.015G050800.1  | 2.1274  | 20.0162  | -3.234  | Down | 1.71E-26  | 9.35E-26  |
| Unigene186    | Potri.001G318500.1  | 6.4414  | 60.6189  | -3.2343 | Down | 0         | 0         |
| Unigene80834  | Potri.001G025100.16 | 8.4704  | 79.73    | -3.2346 | Down | 1.69E-96  | 3.45E-95  |
| Unigene117235 | Potri.002G260600.1  | 2.4372  | 22.9467  | -3.235  | Down | 6.84E-40  | 5.35E-39  |
| Unigene40907  | Potri.019G057500.4  | 6.1112  | 57.5534  | -3.2354 | Down | 3.11E-98  | 6.52E-97  |
| Unigene88246  | Potri.006G275000.5  | 24.9419 | 235.0041 | -3.236  | Down | 0         | 0         |
| Unigene94514  | Potri.004G164400.1  | 4.1354  | 38.9622  | -3.236  | Down | 1.24E-86  | 2.23E-85  |
| Unigene104233 | Potri.015G092200.1  | 0.3666  | 3.4557   | -3.2367 | Down | 5.44E-08  | 1.37E-07  |
| Unigene100900 | Potri.014G160100.1  | 0.3604  | 3.3973   | -3.2367 | Down | 5.44E-08  | 1.37E-07  |
| Unigene117309 | Potri.014G129600.10 | 0.4203  | 3.9619   | -3.2367 | Down | 5.44E-08  | 1.37E-07  |
| Unigene117606 | Potri.010G163200.1  | 0.4011  | 3.7809   | -3.2367 | Down | 5.44E-08  | 1.37E-07  |
| Unigene116399 | Potri.006G185100.1  | 0.4692  | 4.4229   | -3.2367 | Down | 5.44E-08  | 1.37E-07  |
| Unigene52548  | Potri.015G073700.1  | 1.1702  | 11.0312  | -3.2368 | Down | 8.70E-15  | 3.14E-14  |
| Unigene103644 | Potri.015G037000.1  | 0.8382  | 7.9016   | -3.2368 | Down | 8.70E-15  | 3.14E-14  |
| Unigene27119  | Potri.008G200000.1  | 0.6844  | 6.4518   | -3.2368 | Down | 5.44E-08  | 1.37E-07  |
| Unigene116215 | Potri.008G007500.1  | 0.4782  | 4.508    | -3.2368 | Down | 5.44E-08  | 1.37E-07  |
| Unigene115317 | Potri.006G092000.1  | 1.0397  | 9.8013   | -3.2368 | Down | 8.70E-15  | 3.14E-14  |
| Unigene107201 | Potri.005G006500.1  | 0.5702  | 5.3751   | -3.2368 | Down | 1.59E-21  | 7.44E-21  |
| Unigene24742  | Potri.001G073600.1  | 0.7278  | 6.8609   | -3.2368 | Down | 5.44E-08  | 1.37E-07  |
| Unigene27281  | Potri.001G012800.3  | 0.6487  | 6.1151   | -3.2368 | Down | 5.44E-08  | 1.37E-07  |
| Unigene47669  | Potri.017G119400.1  | 0.4144  | 3.9069   | -3.2369 | Down | 5.44E-08  | 1.37E-07  |
| Unigene100616 | Potri.017G057100.1  | 0.448   | 4.2237   | -3.2369 | Down | 5.44E-08  | 1.37E-07  |
| Unigene117746 | Potri.016G059200.1  | 0.3926  | 3.7013   | -3.2369 | Down | 5.44E-08  | 1.37E-07  |
| Unigene117855 | Potri.011G003700.1  | 0.3845  | 3.625    | -3.2369 | Down | 5.44E-08  | 1.37E-07  |
| Unigene99219  | Potri.005G040000.1  | 0.3796  | 3.5788   | -3.2369 | Down | 5.44E-08  | 1.37E-07  |
| Unigene7370   | Potri.010G102600.2  | 3.799   | 35.8442  | -3.238  | Down | 9.78E-57  | 1.09E-55  |
| Unigene80855  | Potri.017G032700.1  | 9.9565  | 93.9789  | -3.2386 | Down | 1.43E-113 | 3.59E-112 |
| Unigene118174 | Potri.005G157600.1  | 1.1741  | 11.0923  | -3.2399 | Down | 2.84E-23  | 1.41E-22  |
| Unigene24645  | Potri.003G078700.1  | 1.0273  | 9.7057   | -3.24   | Down | 2.84E-23  | 1.41E-22  |
| Unigene26318  | Potri.017G032300.1  | 7.947   | 75.1229  | -3.2408 | Down | 1.92E-105 | 4.38E-104 |
| Unigene42081  | Potri.007G007400.1  | 0.4959  | 4.6893   | -3.2413 | Down | 1.53E-16  | 5.94E-16  |
| Unigene35240  | Potri.004G055700.1  | 1.0425  | 9.8591   | -3.2414 | Down | 1.53E-16  | 5.94E-16  |
| Unigene48031  | Potri.001G048200.1  | 1.5352  | 14.5181  | -3.2414 | Down | 7.53E-47  | 6.89E-46  |
| Unigene42848  | Potri.017G095000.2  | 2.7439  | 25.957   | -3.2418 | Down | 1.19E-207 | 6.43E-206 |
| Unigene49679  | Potri.001G089700.1  | 2.2556  | 21.3373  | -3.2418 | Down | 2.33E-70  | 3.30E-69  |
| Unigene118281 | Potri.014G028100.1  | 4.0466  | 38.2897  | -3.2422 | Down | 9.10E-79  | 1.47E-77  |
| Unigene2239   | Potri.002G063500.1  | 3.403   | 32.2057  | -3.2424 | Down | 3.58E-87  | 6.46E-86  |
| Unigene47668  | Potri.006G117900.6  | 26.0209 | 246.2779 | -3.2425 | Down | 0         | 0         |
| Unigene36843  | Potri.001G220800.3  | 1.1735  | 11.1074  | -3.2426 | Down | 5.08E-25  | 2.66E-24  |

|               |                     |         |          |         |      |           |           |
|---------------|---------------------|---------|----------|---------|------|-----------|-----------|
| Unigene41491  | Potri.016G012000.1  | 2.967   | 28.084   | -3.2427 | Down | 1.38E-48  | 1.30E-47  |
| Unigene38858  | Potri.010G235700.1  | 1.5136  | 14.3269  | -3.2427 | Down | 5.08E-25  | 2.66E-24  |
| Unigene45327  | Potri.015G033100.1  | 3.5132  | 33.2595  | -3.2429 | Down | 2.70E-159 | 1.05E-157 |
| Unigene19604  | Potri.002G055400.7  | 10.2937 | 97.4622  | -3.2431 | Down | 3.09E-144 | 1.05E-142 |
| Unigene101341 | Potri.001G312800.1  | 1.4899  | 14.1146  | -3.2439 | Down | 2.51E-50  | 2.47E-49  |
| Unigene103010 | Potri.017G135400.1  | 0.5406  | 5.1251   | -3.2449 | Down | 9.09E-10  | 2.56E-09  |
| Unigene116942 | Potri.002G043700.1  | 0.5518  | 5.2312   | -3.2449 | Down | 9.09E-10  | 2.56E-09  |
| Unigene13555  | Potri.011G117300.4  | 1.5899  | 15.0737  | -3.245  | Down | 1.04E-85  | 1.85E-84  |
| Unigene115593 | Potri.006G083800.1  | 0.6365  | 6.0346   | -3.245  | Down | 9.09E-10  | 2.56E-09  |
| Unigene106074 | Potri.T133000.1     | 0.5283  | 5.0089   | -3.2451 | Down | 9.09E-10  | 2.56E-09  |
| Unigene106370 | Potri.014G084600.1  | 0.6555  | 6.2149   | -3.2451 | Down | 2.69E-18  | 1.12E-17  |
| Unigene116380 | Potri.010G104600.1  | 0.5883  | 5.5778   | -3.2451 | Down | 9.09E-10  | 2.56E-09  |
| Unigene30631  | Potri.009G014900.3  | 0.4869  | 4.6166   | -3.2451 | Down | 9.09E-10  | 2.56E-09  |
| Unigene52668  | Potri.006G079700.2  | 0.3861  | 3.6608   | -3.2451 | Down | 9.09E-10  | 2.56E-09  |
| Unigene92391  | Potri.001G449500.10 | 45.4219 | 431.1626 | -3.2468 | Down | 0         | 0         |
| Unigene48555  | Potri.006G145100.4  | 9.393   | 89.1701  | -3.2469 | Down | 7.48E-118 | 1.97E-116 |
| Unigene27032  | Potri.019G066500.1  | 2.629   | 24.9609  | -3.2471 | Down | 1.64E-28  | 9.55E-28  |
| Unigene10918  | Potri.001G453800.1  | 7.1368  | 67.7979  | -3.2479 | Down | 0         | 0         |
| Unigene15072  | Potri.017G117200.1  | 0.7148  | 6.7909   | -3.248  | Down | 4.77E-20  | 2.13E-19  |
| Unigene34644  | Potri.009G159700.1  | 2.8213  | 26.8033  | -3.248  | Down | 1.88E-131 | 5.67E-130 |
| Unigene530    | Potri.004G044700.1  | 4.9758  | 47.2914  | -3.2486 | Down | 3.94E-219 | 2.28E-217 |
| Unigene45325  | Potri.005G207200.4  | 9.0413  | 85.963   | -3.2491 | Down | 0         | 0         |
| Unigene80730  | Potri.001G320000.1  | 24.9161 | 237.0927 | -3.2503 | Down | 1.32E-283 | 1.08E-281 |
| Unigene115421 | Potri.014G053700.1  | 0.7744  | 7.3696   | -3.2504 | Down | 1.55E-11  | 4.79E-11  |
| Unigene91805  | Potri.019G055500.1  | 2.0345  | 19.362   | -3.2505 | Down | 3.57E-42  | 2.95E-41  |
| Unigene81981  | Potri.017G096500.1  | 2.6023  | 24.7653  | -3.2505 | Down | 5.35E-32  | 3.44E-31  |
| Unigene38856  | Potri.015G085500.1  | 1.0581  | 10.0701  | -3.2505 | Down | 8.50E-22  | 4.01E-21  |
| Unigene116999 | Potri.005G203600.7  | 0.6582  | 6.2642   | -3.2505 | Down | 1.55E-11  | 4.79E-11  |
| Unigene103330 | Potri.003G168000.2  | 1.0657  | 10.142   | -3.2505 | Down | 1.55E-11  | 4.79E-11  |
| Unigene34424  | Potri.017G034500.1  | 15.8285 | 150.7143 | -3.2512 | Down | 0         | 0         |
| Unigene11700  | Potri.012G049000.2  | 3.2371  | 30.8223  | -3.2512 | Down | 2.68E-189 | 1.31E-187 |
| Unigene44984  | Potri.008G032500.1  | 1.5541  | 14.8031  | -3.2517 | Down | 4.14E-76  | 6.41E-75  |
| Unigene45533  | Potri.011G164700.1  | 2.2623  | 21.549   | -3.2518 | Down | 2.16E-140 | 7.09E-139 |
| Unigene2706   | Potri.003G142300.3  | 22.1546 | 211.1239 | -3.2524 | Down | 0         | 0         |
| Unigene47997  | Potri.007G002700.1  | 0.7397  | 7.058    | -3.2542 | Down | 2.67E-13  | 9.02E-13  |
| Unigene43566  | Potri.008G225000.1  | 3.5767  | 34.1299  | -3.2543 | Down | 7.46E-168 | 3.10E-166 |
| Unigene117934 | Potri.003G220800.1  | 0.6627  | 6.3236   | -3.2543 | Down | 2.67E-13  | 9.02E-13  |
| Unigene537    | Potri.008G174400.7  | 5.4004  | 51.5686  | -3.2554 | Down | 7.71E-275 | 6.03E-273 |
| Unigene46462  | Potri.001G366200.1  | 13.2456 | 126.6062 | -3.2568 | Down | 4.24E-214 | 2.38E-212 |

|               |                    |         |          |         |      |           |           |
|---------------|--------------------|---------|----------|---------|------|-----------|-----------|
| Unigene93025  | Potri.014G096100.2 | 20.7377 | 198.2572 | -3.257  | Down | 0         | 0         |
| Unigene12390  | Potri.012G021800.5 | 1.0792  | 10.3188  | -3.2572 | Down | 8.79E-29  | 5.16E-28  |
| Unigene96195  | Potri.017G072600.1 | 0.5828  | 5.5726   | -3.2573 | Down | 4.65E-15  | 1.70E-14  |
| Unigene94105  | Potri.002G201500.4 | 31.1331 | 297.9863 | -3.2587 | Down | 0         | 0         |
| Unigene99679  | Potri.018G074500.2 | 0.3344  | 3.202    | -3.2593 | Down | 8.15E-17  | 3.21E-16  |
| Unigene115433 | Potri.003G098200.2 | 1.1616  | 11.1239  | -3.2595 | Down | 8.15E-17  | 3.21E-16  |
| Unigene116245 | Potri.001G454800.1 | 1.0725  | 10.271   | -3.2595 | Down | 8.15E-17  | 3.21E-16  |
| Unigene9473   | Potri.015G084300.2 | 0.6634  | 6.3534   | -3.2596 | Down | 8.15E-17  | 3.21E-16  |
| Unigene114015 | Potri.018G151900.2 | 5.2475  | 50.2697  | -3.26   | Down | 9.06E-65  | 1.17E-63  |
| Unigene118065 | Potri.015G067000.4 | 6.0935  | 58.3879  | -3.2603 | Down | 2.81E-114 | 7.12E-113 |
| Unigene5864   | Potri.005G006000.2 | 3.1857  | 30.5322  | -3.2606 | Down | 1.35E-83  | 2.33E-82  |
| Unigene7250   | Potri.T071300.1    | 0.7987  | 7.6584   | -3.2613 | Down | 1.44E-18  | 6.07E-18  |
| Unigene27733  | Potri.005G153400.1 | 2.4379  | 23.3757  | -3.2613 | Down | 5.59E-70  | 7.85E-69  |
| Unigene2246   | Potri.012G056400.1 | 0.9097  | 8.7231   | -3.2614 | Down | 7.03E-53  | 7.29E-52  |
| Unigene119197 | Potri.007G013200.1 | 0.6045  | 5.7966   | -3.2614 | Down | 1.44E-18  | 6.07E-18  |
| Unigene89391  | Potri.007G128200.1 | 33.6117 | 322.3898 | -3.2618 | Down | 0         | 0         |
| Unigene85498  | Potri.005G187300.2 | 8.2316  | 78.9847  | -3.2623 | Down | 4.43E-111 | 1.08E-109 |
| Unigene40588  | Potri.017G001400.1 | 10.585  | 101.6577 | -3.2636 | Down | 2.43E-181 | 1.12E-179 |
| Unigene46933  | Potri.005G076600.1 | 0.832   | 7.9922   | -3.2639 | Down | 4.54E-22  | 2.16E-21  |
| Unigene49307  | Potri.010G063600.1 | 0.6782  | 6.5149   | -3.264  | Down | 4.54E-22  | 2.16E-21  |
| Unigene12649  | Potri.003G023000.1 | 2.8815  | 27.6812  | -3.264  | Down | 2.64E-63  | 3.33E-62  |
| Unigene91118  | Potri.015G095500.2 | 10.3559 | 99.525   | -3.2646 | Down | 3.32E-195 | 1.68E-193 |
| Unigene61780  | Potri.010G120100.1 | 4.072   | 39.1323  | -3.2646 | Down | 2.45E-87  | 4.44E-86  |
| Unigene44857  | Potri.003G065300.1 | 5.6245  | 54.0587  | -3.2647 | Down | 6.88E-132 | 2.09E-130 |
| Unigene34742  | Potri.015G040900.1 | 0.9201  | 8.8453   | -3.265  | Down | 8.11E-24  | 4.09E-23  |
| Unigene27123  | Potri.007G044100.1 | 1.7014  | 16.3561  | -3.265  | Down | 8.11E-24  | 4.09E-23  |
| Unigene62044  | Potri.005G043900.1 | 3.4309  | 32.9822  | -3.265  | Down | 1.63E-68  | 2.24E-67  |
| Unigene3492   | Potri.008G057100.1 | 1.8867  | 18.1381  | -3.2651 | Down | 8.11E-24  | 4.09E-23  |
| Unigene16764  | Potri.004G011300.1 | 1.8578  | 17.8601  | -3.2651 | Down | 8.11E-24  | 4.09E-23  |
| Unigene49658  | Potri.002G020700.1 | 54.4252 | 523.3033 | -3.2653 | Down | 0         | 0         |
| Unigene22191  | Potri.014G087000.1 | 5.365   | 51.5881  | -3.2654 | Down | 1.43E-253 | 1.00E-251 |
| Unigene15115  | Potri.009G036900.1 | 2.3004  | 22.1284  | -3.2659 | Down | 1.45E-25  | 7.73E-25  |
| Unigene92305  | Potri.008G210900.1 | 43.3697 | 417.1689 | -3.2659 | Down | 0         | 0         |
| Unigene104599 | Potri.008G079900.2 | 0.5357  | 5.1584   | -3.2674 | Down | 4.70E-29  | 2.78E-28  |
| Unigene33052  | Potri.018G002700.1 | 1.3277  | 12.7946  | -3.2685 | Down | 1.50E-94  | 3.00E-93  |
| Unigene38805  | Potri.010G170000.1 | 1.6496  | 15.8964  | -3.2685 | Down | 1.53E-32  | 9.96E-32  |
| Unigene38189  | Potri.006G013900.1 | 9.9755  | 96.2576  | -3.2704 | Down | 2.45E-239 | 1.59E-237 |
| Unigene14384  | Potri.007G141500.1 | 2.8303  | 27.3347  | -3.2717 | Down | 6.03E-50  | 5.88E-49  |
| Unigene43921  | Potri.018G006000.3 | 28.3477 | 273.8867 | -3.2723 | Down | 0         | 0         |

|               |                    |         |          |         |      |           |           |
|---------------|--------------------|---------|----------|---------|------|-----------|-----------|
| Unigene18646  | Potri.014G029600.1 | 1.9794  | 19.1263  | -3.2724 | Down | 6.73E-57  | 7.55E-56  |
| Unigene104625 | Potri.001G162300.1 | 0.9978  | 9.6432   | -3.2727 | Down | 2.25E-60  | 2.70E-59  |
| Unigene72969  | Potri.001G235500.3 | 12.6711 | 122.4784 | -3.2729 | Down | 2.63E-124 | 7.39E-123 |
| Unigene6036   | Potri.016G022500.1 | 12.0353 | 116.3764 | -3.2735 | Down | 1.07E-210 | 5.91E-209 |
| Unigene69906  | Potri.011G073900.1 | 11.1812 | 108.1373 | -3.2737 | Down | 0         | 0         |
| Unigene42688  | Potri.001G125800.1 | 5.1424  | 49.79    | -3.2753 | Down | 0         | 0         |
| Unigene44562  | Potri.017G129100.9 | 4.8809  | 47.2614  | -3.2754 | Down | 6.46E-142 | 2.15E-140 |
| Unigene36746  | Potri.009G126000.1 | 11.8177 | 114.5079 | -3.2764 | Down | 8.28E-279 | 6.58E-277 |
| Unigene56389  | Potri.015G012800.5 | 0.4004  | 3.8819   | -3.2772 | Down | 8.24E-12  | 2.59E-11  |
| Unigene110691 | Potri.012G090400.2 | 0.3316  | 3.2148   | -3.2772 | Down | 1.15E-04  | 2.19E-04  |
| Unigene58026  | Potri.001G129000.1 | 0.3316  | 3.2148   | -3.2772 | Down | 1.15E-04  | 2.19E-04  |
| Unigene114054 | Potri.015G034100.1 | 0.4239  | 4.1099   | -3.2773 | Down | 1.78E-06  | 4.02E-06  |
| Unigene105722 | Potri.014G193900.3 | 0.4168  | 4.041    | -3.2773 | Down | 2.89E-08  | 7.44E-08  |
| Unigene102124 | Potri.014G050600.1 | 0.3202  | 3.1044   | -3.2773 | Down | 1.15E-04  | 2.19E-04  |
| Unigene114148 | Potri.011G068800.2 | 0.4223  | 4.0943   | -3.2773 | Down | 1.78E-06  | 4.02E-06  |
| Unigene119305 | Potri.008G041800.1 | 0.6661  | 6.4583   | -3.2773 | Down | 2.42E-22  | 1.16E-21  |
| Unigene111980 | Potri.005G024000.1 | 0.4702  | 4.5588   | -3.2773 | Down | 1.78E-06  | 4.02E-06  |
| Unigene26102  | Potri.005G019700.2 | 0.4088  | 3.9635   | -3.2773 | Down | 2.89E-08  | 7.44E-08  |
| Unigene105168 | Potri.003G106100.1 | 0.3768  | 3.6532   | -3.2773 | Down | 1.78E-06  | 4.02E-06  |
| Unigene111506 | Potri.001G324400.2 | 0.3202  | 3.1044   | -3.2773 | Down | 1.15E-04  | 2.19E-04  |
| Unigene60716  | Potri.TI07000.3    | 1.4293  | 13.8587  | -3.2774 | Down | 1.97E-55  | 2.14E-54  |
| Unigene116036 | Potri.019G099800.2 | 0.3657  | 3.5458   | -3.2774 | Down | 1.78E-06  | 4.02E-06  |
| Unigene82296  | Potri.017G041700.6 | 2.4388  | 23.6474  | -3.2774 | Down | 4.52E-31  | 2.83E-30  |
| Unigene107322 | Potri.016G031600.3 | 0.373   | 3.6167   | -3.2774 | Down | 1.15E-04  | 2.19E-04  |
| Unigene97269  | Potri.015G107000.6 | 1.213   | 11.7615  | -3.2774 | Down | 2.51E-29  | 1.49E-28  |
| Unigene117114 | Potri.015G012500.1 | 0.3234  | 3.1358   | -3.2774 | Down | 1.78E-06  | 4.02E-06  |
| Unigene69469  | Potri.014G023300.1 | 1.0219  | 9.9087   | -3.2774 | Down | 7.67E-19  | 3.27E-18  |
| Unigene119144 | Potri.014G008700.1 | 0.5015  | 4.8627   | -3.2774 | Down | 2.48E-15  | 9.16E-15  |
| Unigene97332  | Potri.013G069800.1 | 1.7963  | 17.4174  | -3.2774 | Down | 4.52E-31  | 2.83E-30  |
| Unigene101142 | Potri.013G018200.1 | 0.353   | 3.4227   | -3.2774 | Down | 1.78E-06  | 4.02E-06  |
| Unigene105601 | Potri.013G004200.2 | 0.4329  | 4.1973   | -3.2774 | Down | 8.24E-12  | 2.59E-11  |
| Unigene94549  | Potri.012G126400.1 | 0.6346  | 6.1531   | -3.2774 | Down | 4.35E-17  | 1.73E-16  |
| Unigene8902   | Potri.012G116500.1 | 1.6367  | 15.8699  | -3.2774 | Down | 1.48E-34  | 1.01E-33  |
| Unigene109165 | Potri.011G129700.1 | 0.3519  | 3.412    | -3.2774 | Down | 1.15E-04  | 2.19E-04  |
| Unigene47058  | Potri.011G116900.1 | 0.4099  | 3.9744   | -3.2774 | Down | 4.84E-10  | 1.38E-09  |
| Unigene48747  | Potri.010G252000.2 | 3.5912  | 34.8213  | -3.2774 | Down | 5.20E-78  | 8.27E-77  |
| Unigene48452  | Potri.010G120700.2 | 1.8374  | 17.8161  | -3.2774 | Down | 7.67E-19  | 3.27E-18  |
| Unigene112409 | Potri.009G112700.2 | 0.4624  | 4.4835   | -3.2774 | Down | 1.78E-06  | 4.02E-06  |
| Unigene119057 | Potri.009G098700.1 | 0.7301  | 7.0789   | -3.2774 | Down | 1.36E-20  | 6.18E-20  |

|               |                     |        |         |         |      |          |          |
|---------------|---------------------|--------|---------|---------|------|----------|----------|
| Unigene109884 | Potri.009G086300.1  | 1.1977 | 11.6132 | -3.2774 | Down | 1.42E-13 | 4.87E-13 |
| Unigene71892  | Potri.009G013000.2  | 6.0043 | 58.2195 | -3.2774 | Down | 6.58E-59 | 7.67E-58 |
| Unigene105685 | Potri.007G047900.2  | 0.4924 | 4.7745  | -3.2774 | Down | 2.89E-08 | 7.44E-08 |
| Unigene45873  | Potri.007G026500.3  | 4.6401 | 44.992  | -3.2774 | Down | 9.68E-47 | 8.83E-46 |
| Unigene19736  | Potri.006G228800.1  | 1.9354 | 18.7657 | -3.2774 | Down | 1.36E-20 | 6.18E-20 |
| Unigene109084 | Potri.004G162400.10 | 0.3519 | 3.412   | -3.2774 | Down | 1.15E-04 | 2.19E-04 |
| Unigene52238  | Potri.003G092800.3  | 1.9805 | 19.2035 | -3.2774 | Down | 2.92E-43 | 2.47E-42 |
| Unigene35172  | Potri.003G016900.1  | 1.6441 | 15.9412 | -3.2774 | Down | 3.59E-57 | 4.06E-56 |
| Unigene111668 | Potri.002G212900.1  | 1.9047 | 18.4681 | -3.2774 | Down | 2.42E-22 | 1.16E-21 |
| Unigene3454   | Potri.002G137800.2  | 1.0458 | 10.1402 | -3.2774 | Down | 2.42E-22 | 1.16E-21 |
| Unigene97408  | Potri.001G453500.3  | 0.3519 | 3.412   | -3.2774 | Down | 1.15E-04 | 2.19E-04 |
| Unigene96849  | Potri.001G416200.1  | 0.735  | 7.1264  | -3.2774 | Down | 2.48E-15 | 9.16E-15 |
| Unigene37747  | Potri.001G351200.1  | 1.0864 | 10.534  | -3.2774 | Down | 8.24E-12 | 2.59E-11 |
| Unigene5239   | Potri.001G276200.5  | 0.3391 | 3.2879  | -3.2774 | Down | 2.89E-08 | 7.44E-08 |
| Unigene5066   | Potri.001G244300.1  | 0.6075 | 5.8903  | -3.2774 | Down | 4.84E-10 | 1.38E-09 |
| Unigene24995  | Potri.001G191300.1  | 0.6782 | 6.5758  | -3.2774 | Down | 7.67E-19 | 3.27E-18 |
| Unigene117998 | Potri.018G119800.1  | 0.3739 | 3.6257  | -3.2775 | Down | 2.89E-08 | 7.44E-08 |
| Unigene51165  | Potri.018G038000.1  | 0.7419 | 7.1941  | -3.2775 | Down | 1.36E-20 | 6.18E-20 |
| Unigene7047   | Potri.016G087800.1  | 0.6884 | 6.6751  | -3.2775 | Down | 1.36E-20 | 6.18E-20 |
| Unigene72491  | Potri.009G124100.4  | 1.0811 | 10.4831 | -3.2775 | Down | 8.24E-12 | 2.59E-11 |
| Unigene115587 | Potri.009G038300.5  | 0.8911 | 8.6405  | -3.2775 | Down | 1.42E-13 | 4.87E-13 |
| Unigene101841 | Potri.008G177700.1  | 0.6502 | 6.3048  | -3.2775 | Down | 1.36E-20 | 6.18E-20 |
| Unigene5361   | Potri.008G133200.2  | 0.3705 | 3.5927  | -3.2775 | Down | 1.78E-06 | 4.02E-06 |
| Unigene109297 | Potri.008G014400.1  | 0.3502 | 3.3959  | -3.2775 | Down | 1.15E-04 | 2.19E-04 |
| Unigene4712   | Potri.006G189000.1  | 0.3705 | 3.5927  | -3.2775 | Down | 1.78E-06 | 4.02E-06 |
| Unigene4163   | Potri.005G146500.3  | 0.5634 | 5.4632  | -3.2775 | Down | 7.67E-19 | 3.27E-18 |
| Unigene118813 | Potri.005G092400.1  | 0.9756 | 9.4601  | -3.2775 | Down | 4.33E-24 | 2.20E-23 |
| Unigene9656   | Potri.004G120500.1  | 1.089  | 10.5596 | -3.2775 | Down | 2.42E-22 | 1.16E-21 |
| Unigene47041  | Potri.004G082900.2  | 0.8068 | 7.8231  | -3.2775 | Down | 4.33E-24 | 2.20E-23 |
| Unigene51749  | Potri.003G109700.4  | 0.5512 | 5.3448  | -3.2775 | Down | 1.78E-06 | 4.02E-06 |
| Unigene107669 | Potri.003G104200.1  | 0.3693 | 3.5809  | -3.2775 | Down | 1.15E-04 | 2.19E-04 |
| Unigene95247  | Potri.002G206800.1  | 0.3266 | 3.167   | -3.2775 | Down | 4.84E-10 | 1.38E-09 |
| Unigene101008 | Potri.019G080000.1  | 0.3108 | 3.0139  | -3.2776 | Down | 1.15E-04 | 2.19E-04 |
| Unigene111411 | Potri.018G026800.2  | 0.3215 | 3.1178  | -3.2776 | Down | 1.15E-04 | 2.19E-04 |
| Unigene108687 | Potri.012G118200.1  | 0.3569 | 3.4609  | -3.2776 | Down | 1.15E-04 | 2.19E-04 |
| Unigene116141 | Potri.010G168000.1  | 0.4828 | 4.6818  | -3.2776 | Down | 2.89E-08 | 7.44E-08 |
| Unigene36701  | Potri.010G130000.1  | 0.3885 | 3.7674  | -3.2776 | Down | 2.89E-08 | 7.44E-08 |
| Unigene95652  | Potri.009G132700.2  | 0.3229 | 3.1313  | -3.2776 | Down | 1.15E-04 | 2.19E-04 |
| Unigene97006  | Potri.008G183200.1  | 0.3215 | 3.1178  | -3.2776 | Down | 1.78E-06 | 4.02E-06 |



|               |                    |         |          |         |      |           |           |
|---------------|--------------------|---------|----------|---------|------|-----------|-----------|
| Unigene118743 | Potri.005G226700.2 | 0.3095  | 3.0014   | -3.2776 | Down | 2.89E-08  | 7.44E-08  |
| Unigene114486 | Potri.004G097000.1 | 0.4144  | 4.0185   | -3.2776 | Down | 1.78E-06  | 4.02E-06  |
| Unigene94885  | Potri.002G167100.1 | 0.337   | 3.2681   | -3.2776 | Down | 1.78E-06  | 4.02E-06  |
| Unigene112022 | Potri.001G117700.1 | 0.3134  | 3.0392   | -3.2776 | Down | 1.15E-04  | 2.19E-04  |
| Unigene51722  | Potri.001G320000.1 | 21.3638 | 207.2744 | -3.2783 | Down | 0         | 0         |
| Unigene82015  | Potri.014G072300.1 | 52.7687 | 512.7508 | -3.2805 | Down | 0         | 0         |
| Unigene44232  | Potri.010G051400.4 | 1.5769  | 15.3356  | -3.2817 | Down | 2.49E-132 | 7.60E-131 |
| Unigene8710   | Potri.016G032600.2 | 2.5321  | 24.6567  | -3.2836 | Down | 5.17E-47  | 4.75E-46  |
| Unigene13615  | Potri.003G034700.1 | 1.4666  | 14.2904  | -3.2845 | Down | 7.07E-159 | 2.73E-157 |
| Unigene33551  | Potri.017G041600.2 | 3.3493  | 32.6402  | -3.2847 | Down | 1.48E-78  | 2.38E-77  |
| Unigene89441  | Potri.003G166500.2 | 4.5053  | 43.9102  | -3.2849 | Down | 8.08E-77  | 1.26E-75  |
| Unigene14614  | Potri.002G260100.2 | 4.9529  | 48.2881  | -3.2853 | Down | 2.82E-143 | 9.48E-142 |
| Unigene12936  | Potri.002G191000.2 | 2.9879  | 29.1329  | -3.2854 | Down | 1.37E-106 | 3.17E-105 |
| Unigene107232 | Potri.010G191000.3 | 0.6814  | 6.646    | -3.2859 | Down | 7.90E-35  | 5.44E-34  |
| Unigene94656  | Potri.004G179300.1 | 1.1283  | 11.0116  | -3.2868 | Down | 2.42E-31  | 1.52E-30  |
| Unigene24013  | Potri.007G010200.7 | 2.3527  | 22.9705  | -3.2874 | Down | 9.05E-86  | 1.61E-84  |
| Unigene18963  | Potri.012G042200.4 | 4.1743  | 40.7655  | -3.2877 | Down | 2.49E-110 | 6.04E-109 |
| Unigene32259  | Potri.013G027100.1 | 1.9447  | 18.9935  | -3.2879 | Down | 1.35E-108 | 3.20E-107 |
| Unigene1997   | Potri.011G140200.1 | 4.8149  | 47.0326  | -3.2881 | Down | 3.81E-133 | 1.17E-131 |
| Unigene119397 | Potri.005G042400.1 | 0.7591  | 7.4155   | -3.2882 | Down | 7.44E-28  | 4.25E-27  |
| Unigene32724  | Potri.004G046100.1 | 2.3197  | 22.6628  | -3.2883 | Down | 5.91E-156 | 2.23E-154 |
| Unigene116882 | Potri.003G112700.1 | 1.5541  | 15.1891  | -3.2889 | Down | 4.14E-26  | 2.24E-25  |
| Unigene102449 | Potri.001G091700.1 | 0.9271  | 9.0666   | -3.2898 | Down | 2.31E-24  | 1.19E-23  |
| Unigene42599  | Potri.009G079500.1 | 11.9939 | 117.4129 | -3.2912 | Down | 0         | 0         |
| Unigene48502  | Potri.016G021600.1 | 7.7239  | 75.6303  | -3.2916 | Down | 2.01E-279 | 1.60E-277 |
| Unigene118918 | Potri.010G004400.2 | 0.786   | 7.6983   | -3.2919 | Down | 7.26E-21  | 3.33E-20  |
| Unigene13770  | Potri.006G005100.1 | 0.8125  | 7.9575   | -3.2919 | Down | 7.26E-21  | 3.33E-20  |
| Unigene95231  | Potri.007G058200.1 | 0.8839  | 8.6655   | -3.2933 | Down | 4.09E-19  | 1.76E-18  |
| Unigene71635  | Potri.012G070900.3 | 15.7243 | 154.2403 | -3.2941 | Down | 2.64E-153 | 9.74E-152 |
| Unigene5831   | Potri.011G142400.1 | 1.7673  | 17.3368  | -3.2942 | Down | 4.21E-35  | 2.92E-34  |
| Unigene43296  | Potri.001G462600.1 | 3.6593  | 35.8969  | -3.2942 | Down | 3.34E-102 | 7.35E-101 |
| Unigene368    | Potri.017G053200.2 | 5.5213  | 54.1707  | -3.2944 | Down | 0         | 0         |
| Unigene107261 | Potri.012G033400.1 | 3.357   | 32.9519  | -3.2951 | Down | 2.33E-33  | 1.55E-32  |
| Unigene50215  | Potri.001G334700.1 | 2.9065  | 28.5298  | -3.2951 | Down | 5.35E-97  | 1.10E-95  |
| Unigene41424  | Potri.001G093000.1 | 1.7576  | 17.2523  | -3.2951 | Down | 3.29E-65  | 4.28E-64  |
| Unigene119168 | Potri.018G087100.2 | 0.5576  | 5.4737   | -3.2952 | Down | 2.32E-17  | 9.33E-17  |
| Unigene109228 | Potri.005G207200.1 | 10.682  | 104.8966 | -3.2957 | Down | 2.06E-109 | 4.92E-108 |
| Unigene102513 | Potri.016G031200.1 | 0.6459  | 6.3496   | -3.2973 | Down | 1.32E-15  | 4.93E-15  |
| Unigene17871  | Potri.008G134900.2 | 1.6859  | 16.5736  | -3.2973 | Down | 7.14E-30  | 4.32E-29  |

|               |                    |         |          |         |      |           |           |
|---------------|--------------------|---------|----------|---------|------|-----------|-----------|
| Unigene105767 | Potri.003G050100.1 | 0.9473  | 9.3128   | -3.2973 | Down | 1.32E-15  | 4.93E-15  |
| Unigene107179 | Potri.008G144300.3 | 0.4287  | 4.2148   | -3.2974 | Down | 1.32E-15  | 4.93E-15  |
| Unigene44103  | Potri.019G119200.1 | 7.9637  | 78.3568  | -3.2985 | Down | 3.41E-175 | 1.49E-173 |
| Unigene119137 | Potri.009G098800.1 | 0.9451  | 9.2996   | -3.2986 | Down | 3.97E-28  | 2.28E-27  |
| Unigene25493  | Potri.013G156700.1 | 0.8185  | 8.0622   | -3.3001 | Down | 2.21E-26  | 1.21E-25  |
| Unigene72717  | Potri.008G129800.1 | 1.2553  | 12.3647  | -3.3001 | Down | 7.57E-14  | 2.62E-13  |
| Unigene28637  | Potri.004G205500.1 | 2.0688  | 20.3876  | -3.3008 | Down | 5.23E-62  | 6.44E-61  |
| Unigene26575  | Potri.019G001700.1 | 1.4209  | 14.0074  | -3.3013 | Down | 4.07E-37  | 2.98E-36  |
| Unigene106995 | Potri.005G068200.1 | 0.5186  | 5.1145   | -3.3019 | Down | 1.23E-24  | 6.37E-24  |
| Unigene48085  | Potri.003G027200.1 | 2.3312  | 22.9906  | -3.3019 | Down | 1.23E-24  | 6.37E-24  |
| Unigene10888  | Potri.006G092000.1 | 5.1581  | 50.8836  | -3.3023 | Down | 8.06E-263 | 5.94E-261 |
| Unigene17807  | Potri.006G228400.1 | 0.9109  | 8.9874   | -3.3025 | Down | 2.25E-35  | 1.57E-34  |
| Unigene10902  | Potri.002G262900.1 | 4.4459  | 43.8832  | -3.3031 | Down | 1.72E-243 | 1.15E-241 |
| Unigene12767  | Potri.002G068000.1 | 11.9359 | 117.8096 | -3.3031 | Down | 0         | 0         |
| Unigene31888  | Potri.008G179100.1 | 3.0313  | 29.9307  | -3.3036 | Down | 0         | 0         |
| Unigene117155 | Potri.018G098500.1 | 0.6431  | 6.3511   | -3.3039 | Down | 4.38E-12  | 1.40E-11  |
| Unigene98944  | Potri.013G025200.1 | 1.0864  | 10.7291  | -3.3039 | Down | 4.38E-12  | 1.40E-11  |
| Unigene2376   | Potri.012G037400.1 | 1.1556  | 11.4123  | -3.3039 | Down | 1.24E-33  | 8.31E-33  |
| Unigene23283  | Potri.009G038600.2 | 1.0081  | 9.9558   | -3.3039 | Down | 4.66E-55  | 5.04E-54  |
| Unigene93776  | Potri.002G201500.4 | 40.7855 | 403.1039 | -3.305  | Down | 0         | 0         |
| Unigene119437 | Potri.007G092300.1 | 0.8098  | 8.0062   | -3.3055 | Down | 6.87E-32  | 4.40E-31  |
| Unigene3209   | Potri.006G152800.3 | 1.1656  | 11.5304  | -3.3063 | Down | 7.16E-41  | 5.73E-40  |
| Unigene34381  | Potri.007G026000.1 | 1.7762  | 17.5766  | -3.3068 | Down | 4.34E-98  | 9.07E-97  |
| Unigene87956  | Potri.005G205800.2 | 13.7721 | 136.3824 | -3.3078 | Down | 4.82E-216 | 2.74E-214 |
| Unigene99673  | Potri.003G063400.1 | 1.4695  | 14.5514  | -3.3078 | Down | 3.45E-123 | 9.58E-122 |
| Unigene88425  | Potri.007G136900.1 | 34.9473 | 346.0996 | -3.3079 | Down | 0         | 0         |
| Unigene60968  | Potri.016G011200.5 | 7.005   | 69.393   | -3.3083 | Down | 2.44E-139 | 7.94E-138 |
| Unigene114124 | Potri.017G026500.1 | 0.7038  | 6.9755   | -3.3091 | Down | 2.57E-10  | 7.47E-10  |
| Unigene57759  | Potri.011G126700.2 | 6.8314  | 67.7113  | -3.3091 | Down | 3.78E-91  | 7.19E-90  |
| Unigene95656  | Potri.018G039500.1 | 0.4317  | 4.279    | -3.3092 | Down | 2.57E-10  | 7.47E-10  |
| Unigene50925  | Potri.003G065600.1 | 1.8465  | 18.3022  | -3.3092 | Down | 2.18E-19  | 9.48E-19  |
| Unigene10276  | Potri.002G000800.1 | 11.8126 | 117.0973 | -3.3093 | Down | 0         | 0         |
| Unigene37741  | Potri.001G375800.1 | 25.2285 | 250.0846 | -3.3093 | Down | 0         | 0         |
| Unigene88369  | Potri.009G131200.1 | 10.5607 | 104.6994 | -3.3095 | Down | 6.75E-170 | 2.85E-168 |
| Unigene20658  | Potri.002G013700.1 | 3.8317  | 37.9921  | -3.3096 | Down | 2.98E-116 | 7.71E-115 |
| Unigene24161  | Potri.009G074600.1 | 1.0446  | 10.3608  | -3.3101 | Down | 1.49E-62  | 1.85E-61  |
| Unigene38737  | Potri.014G152000.3 | 1.6336  | 16.2061  | -3.3104 | Down | 1.26E-44  | 1.10E-43  |
| Unigene58750  | Potri.008G164400.1 | 7.8096  | 77.4821  | -3.3105 | Down | 9.97E-122 | 2.74E-120 |
| Unigene3936   | Potri.002G152300.7 | 1.2705  | 12.6129  | -3.3114 | Down | 1.18E-26  | 6.47E-26  |

|               |                    |         |          |         |      |           |           |
|---------------|--------------------|---------|----------|---------|------|-----------|-----------|
| Unigene19179  | Potri.008G049000.1 | 0.6701  | 6.6574   | -3.3125 | Down | 1.23E-17  | 5.02E-17  |
| Unigene40900  | Potri.T127900.1    | 1.1341  | 11.2681  | -3.3126 | Down | 1.23E-17  | 5.02E-17  |
| Unigene30837  | Potri.006G186300.1 | 1.0911  | 10.8409  | -3.3126 | Down | 4.08E-50  | 3.99E-49  |
| Unigene81212  | Potri.007G136900.1 | 11.6469 | 115.7906 | -3.3135 | Down | 1.26E-143 | 4.26E-142 |
| Unigene46990  | Potri.001G076600.1 | 3.6364  | 36.1555  | -3.3136 | Down | 1.45E-64  | 1.87E-63  |
| Unigene21069  | Potri.010G164100.3 | 7.2134  | 71.7628  | -3.3145 | Down | 1.08E-285 | 8.96E-284 |
| Unigene103896 | Potri.006G202100.1 | 0.3739  | 3.72     | -3.3146 | Down | 3.66E-32  | 2.36E-31  |
| Unigene106895 | Potri.017G095000.2 | 0.8332  | 8.2905   | -3.3147 | Down | 3.66E-32  | 2.36E-31  |
| Unigene59514  | Potri.001G189500.2 | 3.4095  | 33.945   | -3.3156 | Down | 2.27E-300 | 2.02E-298 |
| Unigene8758   | Potri.005G219300.1 | 1.2676  | 12.6225  | -3.3158 | Down | 4.33E-61  | 5.24E-60  |
| Unigene67588  | Potri.010G153300.2 | 0.5007  | 4.9894   | -3.3168 | Down | 1.54E-08  | 4.02E-08  |
| Unigene106865 | Potri.009G004300.1 | 0.3202  | 3.1907   | -3.3168 | Down | 1.54E-08  | 4.02E-08  |
| Unigene15026  | Potri.009G105600.1 | 0.9997  | 9.9622   | -3.3169 | Down | 2.03E-30  | 1.25E-29  |
| Unigene27130  | Potri.007G026500.2 | 0.5641  | 5.6214   | -3.3169 | Down | 7.02E-16  | 2.66E-15  |
| Unigene10341  | Potri.006G114300.3 | 2.2866  | 22.787   | -3.3169 | Down | 2.03E-30  | 1.25E-29  |
| Unigene40764  | Potri.012G115900.2 | 0.5944  | 5.9237   | -3.317  | Down | 1.54E-08  | 4.02E-08  |
| Unigene73451  | Potri.007G067300.1 | 0.7071  | 7.0467   | -3.317  | Down | 1.54E-08  | 4.02E-08  |
| Unigene117334 | Potri.006G067100.1 | 0.4191  | 4.1766   | -3.317  | Down | 1.54E-08  | 4.02E-08  |
| Unigene113877 | Potri.014G137200.1 | 0.5716  | 5.6968   | -3.3171 | Down | 1.54E-08  | 4.02E-08  |
| Unigene15215  | Potri.001G241300.1 | 0.3108  | 3.0976   | -3.3171 | Down | 1.54E-08  | 4.02E-08  |
| Unigene91857  | Potri.010G130800.3 | 46.4979 | 463.8573 | -3.3184 | Down | 0         | 0         |
| Unigene14397  | Potri.017G001400.1 | 13.5687 | 135.4229 | -3.3191 | Down | 0         | 0         |
| Unigene114247 | Potri.002G137200.1 | 2.1034  | 20.999   | -3.3195 | Down | 1.13E-28  | 6.58E-28  |
| Unigene31370  | Potri.017G052100.1 | 5.8183  | 58.095   | -3.3197 | Down | 6.35E-103 | 1.41E-101 |
| Unigene32914  | Potri.005G184700.1 | 2.4785  | 24.7573  | -3.3203 | Down | 3.49E-148 | 1.23E-146 |
| Unigene4588   | Potri.002G129100.2 | 0.8824  | 8.8148   | -3.3204 | Down | 2.06E-21  | 9.59E-21  |
| Unigene42630  | Potri.014G018900.1 | 1.2421  | 12.4083  | -3.3205 | Down | 2.31E-61  | 2.81E-60  |
| Unigene112951 | Potri.001G281100.1 | 1.6544  | 16.5278  | -3.3205 | Down | 2.06E-21  | 9.59E-21  |
| Unigene16540  | Potri.001G233200.1 | 0.6576  | 6.5729   | -3.3212 | Down | 3.52E-34  | 2.39E-33  |
| Unigene50829  | Potri.013G073900.3 | 2.1247  | 21.2371  | -3.3213 | Down | 7.57E-67  | 1.01E-65  |
| Unigene40181  | Potri.003G112700.1 | 2.5193  | 25.1817  | -3.3213 | Down | 7.57E-67  | 1.01E-65  |
| Unigene22244  | Potri.016G133200.1 | 1.9348  | 19.3408  | -3.3214 | Down | 3.84E-112 | 9.49E-111 |
| Unigene46922  | Potri.012G016200.5 | 1.2498  | 12.4974  | -3.3219 | Down | 1.26E-59  | 1.49E-58  |
| Unigene91804  | Potri.011G055600.1 | 4.4929  | 44.9344  | -3.3221 | Down | 1.02E-97  | 2.11E-96  |
| Unigene4306   | Potri.010G070200.1 | 1.1656  | 11.6609  | -3.3225 | Down | 4.02E-14  | 1.41E-13  |
| Unigene114317 | Potri.001G213700.1 | 0.9779  | 9.7829   | -3.3225 | Down | 4.02E-14  | 1.41E-13  |
| Unigene119381 | Potri.001G295800.1 | 0.5145  | 5.1548   | -3.3247 | Down | 1.16E-19  | 5.10E-19  |
| Unigene21616  | Potri.T092000.1    | 7.8245  | 78.4067  | -3.3249 | Down | 0         | 0         |
| Unigene53159  | Potri.005G069100.1 | 3.6506  | 36.5942  | -3.3254 | Down | 1.97E-43  | 1.67E-42  |

|               |                    |         |          |         |      |           |           |
|---------------|--------------------|---------|----------|---------|------|-----------|-----------|
| Unigene51630  | Potri.013G025700.4 | 0.6753  | 6.7722   | -3.326  | Down | 3.49E-25  | 1.84E-24  |
| Unigene63046  | Potri.011G057500.1 | 6.0369  | 60.5798  | -3.327  | Down | 2.00E-256 | 1.43E-254 |
| Unigene91682  | Potri.014G086300.7 | 20.7603 | 208.3505 | -3.3271 | Down | 0         | 0         |
| Unigene15069  | Potri.007G011000.5 | 3.3169  | 33.3079  | -3.328  | Down | 2.89E-98  | 6.05E-97  |
| Unigene19926  | Potri.014G036600.1 | 1.0173  | 10.229   | -3.3298 | Down | 5.99E-29  | 3.53E-28  |
| Unigene99307  | Potri.005G046000.1 | 0.4239  | 4.2621   | -3.3298 | Down | 9.42E-07  | 2.17E-06  |
| Unigene114123 | Potri.001G134000.2 | 0.4223  | 4.246    | -3.3298 | Down | 9.42E-07  | 2.17E-06  |
| Unigene31616  | Potri.019G082400.1 | 1.1981  | 12.047   | -3.3299 | Down | 5.99E-29  | 3.53E-28  |
| Unigene115334 | Potri.015G124400.2 | 0.7798  | 7.841    | -3.3299 | Down | 2.33E-12  | 7.52E-12  |
| Unigene116549 | Potri.015G082800.2 | 1.3857  | 13.9342  | -3.3299 | Down | 1.95E-23  | 9.71E-23  |
| Unigene101780 | Potri.015G004200.1 | 0.3422  | 3.4409   | -3.3299 | Down | 9.42E-07  | 2.17E-06  |
| Unigene104277 | Potri.013G016500.2 | 0.3117  | 3.1342   | -3.3299 | Down | 9.42E-07  | 2.17E-06  |
| Unigene100130 | Potri.004G005900.1 | 1.0304  | 10.3608  | -3.3299 | Down | 5.99E-29  | 3.53E-28  |
| Unigene114575 | Potri.001G111500.5 | 0.4114  | 4.1367   | -3.3299 | Down | 9.42E-07  | 2.17E-06  |
| Unigene62003  | Potri.016G047900.1 | 0.4823  | 4.8499   | -3.33   | Down | 9.42E-07  | 2.17E-06  |
| Unigene101846 | Potri.012G037300.1 | 0.5458  | 5.4887   | -3.33   | Down | 9.42E-07  | 2.17E-06  |
| Unigene110107 | Potri.011G019100.1 | 0.5086  | 5.1145   | -3.33   | Down | 9.42E-07  | 2.17E-06  |
| Unigene113492 | Potri.002G254200.1 | 0.4388  | 4.4125   | -3.33   | Down | 9.42E-07  | 2.17E-06  |
| Unigene48666  | Potri.001G374200.1 | 2.2824  | 22.9722  | -3.3313 | Down | 3.85E-71  | 5.51E-70  |
| Unigene104628 | Potri.008G054400.1 | 0.9195  | 9.2603   | -3.3321 | Down | 1.05E-43  | 8.94E-43  |
| Unigene22194  | Potri.010G114200.1 | 16.9928 | 171.1562 | -3.3323 | Down | 0         | 0         |
| Unigene25229  | Potri.013G028700.1 | 4.9971  | 50.3757  | -3.3336 | Down | 6.00E-53  | 6.22E-52  |
| Unigene32090  | Potri.010G125800.1 | 1.9355  | 19.5117  | -3.3336 | Down | 6.19E-130 | 1.84E-128 |
| Unigene48521  | Potri.001G061200.2 | 3.5047  | 35.3306  | -3.3336 | Down | 6.00E-53  | 6.22E-52  |
| Unigene105454 | Potri.011G154300.1 | 0.9288  | 9.3659   | -3.334  | Down | 1.85E-47  | 1.72E-46  |
| Unigene12707  | Potri.004G132200.3 | 0.6043  | 6.0958   | -3.3345 | Down | 5.76E-42  | 4.73E-41  |
| Unigene116410 | Potri.008G068800.3 | 0.9384  | 9.4776   | -3.3362 | Down | 3.73E-16  | 1.43E-15  |
| Unigene99847  | Potri.005G095300.8 | 1.0397  | 10.5014  | -3.3363 | Down | 3.73E-16  | 1.43E-15  |
| Unigene20749  | Potri.014G100600.1 | 0.5475  | 5.5301   | -3.3364 | Down | 3.73E-16  | 1.43E-15  |
| Unigene51369  | Potri.006G137000.1 | 2.7729  | 28.0429  | -3.3382 | Down | 1.04E-58  | 1.21E-57  |
| Unigene35632  | Potri.017G098200.2 | 1.9923  | 20.1522  | -3.3384 | Down | 9.98E-35  | 6.86E-34  |
| Unigene4309   | Potri.006G117900.4 | 51.3174 | 519.5185 | -3.3397 | Down | 0         | 0         |
| Unigene117791 | Potri.016G018400.1 | 0.4857  | 4.9185   | -3.3401 | Down | 1.36E-10  | 4.03E-10  |
| Unigene117108 | Potri.004G202600.1 | 0.5406  | 5.4745   | -3.3401 | Down | 1.36E-10  | 4.03E-10  |
| Unigene51338  | Potri.001G076600.3 | 2.1437  | 21.7092  | -3.3401 | Down | 3.19E-29  | 1.89E-28  |
| Unigene51365  | Potri.T011100.1    | 1.0233  | 10.3633  | -3.3402 | Down | 1.74E-38  | 1.32E-37  |
| Unigene101549 | Potri.012G057400.3 | 0.4571  | 4.6292   | -3.3402 | Down | 1.36E-10  | 4.03E-10  |
| Unigene25498  | Potri.009G112700.2 | 1.5413  | 15.6091  | -3.3402 | Down | 6.16E-20  | 2.73E-19  |
| Unigene115935 | Potri.008G021600.1 | 0.6155  | 6.2333   | -3.3402 | Down | 1.36E-10  | 4.03E-10  |

|               |                     |         |          |         |      |           |           |
|---------------|---------------------|---------|----------|---------|------|-----------|-----------|
| Unigene73638  | Potri.006G260500.4  | 0.8797  | 8.909    | -3.3402 | Down | 1.36E-10  | 4.03E-10  |
| Unigene45786  | Potri.006G021400.1  | 1.2996  | 13.1617  | -3.3402 | Down | 1.74E-38  | 1.32E-37  |
| Unigene117565 | Potri.010G040400.1  | 0.504   | 5.1046   | -3.3403 | Down | 1.36E-10  | 4.03E-10  |
| Unigene32207  | Potri.005G090300.1  | 9.3981  | 95.1862  | -3.3403 | Down | 0         | 0         |
| Unigene3530   | Potri.013G077100.1  | 4.9099  | 49.7409  | -3.3407 | Down | 4.59E-116 | 1.19E-114 |
| Unigene37478  | Potri.001G229200.1  | 9.8577  | 99.8889  | -3.341  | Down | 1.84E-206 | 9.95E-205 |
| Unigene97694  | Potri.015G058900.1  | 0.9804  | 9.9383   | -3.3416 | Down | 3.06E-42  | 2.53E-41  |
| Unigene41328  | Potri.018G038400.1  | 1.0162  | 10.3039  | -3.3419 | Down | 5.52E-33  | 3.64E-32  |
| Unigene38857  | Potri.011G166800.1  | 0.9464  | 9.5965   | -3.342  | Down | 5.52E-33  | 3.64E-32  |
| Unigene118018 | Potri.012G007400.1  | 1.1162  | 11.324   | -3.3427 | Down | 1.04E-23  | 5.21E-23  |
| Unigene17056  | Potri.006G081700.1  | 3.5881  | 36.4094  | -3.343  | Down | 3.45E-81  | 5.74E-80  |
| Unigene44354  | Potri.015G016000.1  | 1.2723  | 12.9141  | -3.3434 | Down | 9.61E-37  | 6.98E-36  |
| Unigene38699  | Potri.010G192400.2  | 1.7455  | 17.7171  | -3.3434 | Down | 9.61E-37  | 6.98E-36  |
| Unigene88670  | Potri.016G021700.1  | 13.9046 | 141.2427 | -3.3445 | Down | 6.55E-235 | 4.12E-233 |
| Unigene113213 | Potri.006G258800.1  | 2.0722  | 21.0494  | -3.3445 | Down | 1.77E-27  | 9.99E-27  |
| Unigene97974  | Potri.018G141000.1  | 0.6712  | 6.8181   | -3.3446 | Down | 2.14E-14  | 7.58E-14  |
| Unigene102414 | Potri.011G140900.1  | 0.3404  | 3.4579   | -3.3446 | Down | 2.14E-14  | 7.58E-14  |
| Unigene57644  | Potri.004G046600.1  | 3.7099  | 37.7006  | -3.3451 | Down | 8.73E-139 | 2.82E-137 |
| Unigene32269  | Potri.006G068500.2  | 6.0316  | 61.3542  | -3.3465 | Down | 6.00E-304 | 5.39E-302 |
| Unigene6999   | Potri.001G146200.10 | 7.563   | 76.9445  | -3.3468 | Down | 5.75E-165 | 2.35E-163 |
| Unigene52432  | Potri.007G008100.4  | 1.4255  | 14.5042  | -3.3469 | Down | 5.31E-35  | 3.67E-34  |
| Unigene33496  | Potri.011G007600.4  | 1.3786  | 14.0277  | -3.347  | Down | 5.31E-35  | 3.67E-34  |
| Unigene102986 | Potri.003G111500.2  | 0.9674  | 9.8436   | -3.347  | Down | 3.48E-18  | 1.45E-17  |
| Unigene101196 | Potri.010G223200.1  | 1.1694  | 11.9035  | -3.3475 | Down | 1.65E-55  | 1.80E-54  |
| Unigene47020  | Potri.007G043300.2  | 1.8155  | 18.4923  | -3.3485 | Down | 5.81E-22  | 2.76E-21  |
| Unigene118565 | Potri.013G047900.1  | 2.8692  | 29.2336  | -3.3489 | Down | 9.39E-67  | 1.26E-65  |
| Unigene31381  | Potri.017G083700.1  | 1.0066  | 10.2588  | -3.3493 | Down | 1.68E-70  | 2.38E-69  |
| Unigene9755   | Potri.006G230600.1  | 0.9047  | 9.2216   | -3.3495 | Down | 9.87E-26  | 5.28E-25  |
| Unigene22477  | Potri.009G115400.6  | 8.1284  | 82.8766  | -3.3499 | Down | 0         | 0         |
| Unigene93121  | Potri.017G034700.2  | 24.8432 | 253.3317 | -3.3501 | Down | 0         | 0         |
| Unigene47492  | Potri.001G084400.1  | 38.5682 | 393.7421 | -3.3518 | Down | 0         | 0         |
| Unigene72305  | Potri.T156100.1     | 50.1552 | 512.2638 | -3.3524 | Down | 0         | 0         |
| Unigene31140  | Potri.019G133500.3  | 1.8915  | 19.3182  | -3.3524 | Down | 2.79E-48  | 2.63E-47  |
| Unigene16920  | Potri.014G031300.1  | 3.891   | 39.7516  | -3.3528 | Down | 5.97E-110 | 1.44E-108 |
| Unigene39512  | Potri.001G472400.1  | 2.1198  | 21.6718  | -3.3538 | Down | 1.68E-89  | 3.13E-88  |
| Unigene3109   | Potri.001G084000.2  | 4.4524  | 45.5251  | -3.354  | Down | 1.02E-199 | 5.33E-198 |
| Unigene32659  | Potri.007G140200.1  | 1.2106  | 12.3847  | -3.3548 | Down | 5.53E-198 | 2.84E-196 |
| Unigene98396  | Potri.019G022700.1  | 0.3536  | 3.6186   | -3.3552 | Down | 6.06E-05  | 1.19E-04  |
| Unigene94907  | Potri.015G002800.1  | 0.3258  | 3.3341   | -3.3552 | Down | 6.06E-05  | 1.19E-04  |

|               |                    |        |         |         |      |          |          |
|---------------|--------------------|--------|---------|---------|------|----------|----------|
| Unigene113352 | Potri.011G055200.1 | 0.2949 | 3.0179  | -3.3552 | Down | 6.06E-05 | 1.19E-04 |
| Unigene110602 | Potri.006G005100.1 | 0.3316 | 3.3934  | -3.3552 | Down | 6.06E-05 | 1.19E-04 |
| Unigene112366 | Potri.002G022300.2 | 0.3083 | 3.155   | -3.3552 | Down | 6.06E-05 | 1.19E-04 |
| Unigene100896 | Potri.T090200.1    | 0.3202 | 3.2769  | -3.3553 | Down | 6.06E-05 | 1.19E-04 |
| Unigene109441 | Potri.T035900.2    | 0.347  | 3.5513  | -3.3553 | Down | 6.06E-05 | 1.19E-04 |
| Unigene41781  | Potri.016G030300.1 | 0.6691 | 6.8477  | -3.3553 | Down | 1.98E-16 | 7.68E-16 |
| Unigene107175 | Potri.014G139600.1 | 0.3277 | 3.3537  | -3.3553 | Down | 1.23E-12 | 4.04E-12 |
| Unigene117103 | Potri.011G080300.1 | 0.4325 | 4.4262  | -3.3553 | Down | 8.13E-09 | 2.16E-08 |
| Unigene111895 | Potri.010G084100.3 | 0.3148 | 3.2216  | -3.3553 | Down | 6.06E-05 | 1.19E-04 |
| Unigene96105  | Potri.008G059100.2 | 0.551  | 5.639   | -3.3553 | Down | 3.27E-20 | 1.47E-19 |
| Unigene95771  | Potri.T144600.1    | 1.0361 | 10.6044 | -3.3554 | Down | 1.23E-12 | 4.04E-12 |
| Unigene104575 | Potri.T116200.1    | 0.5588 | 5.7192  | -3.3554 | Down | 8.13E-09 | 2.16E-08 |
| Unigene114388 | Potri.018G151900.2 | 0.832  | 8.5151  | -3.3554 | Down | 1.23E-12 | 4.04E-12 |
| Unigene107804 | Potri.018G149900.2 | 0.3675 | 3.7612  | -3.3554 | Down | 6.06E-05 | 1.19E-04 |
| Unigene97501  | Potri.018G122300.2 | 0.2984 | 3.0541  | -3.3554 | Down | 6.06E-05 | 1.19E-04 |
| Unigene94772  | Potri.017G129500.1 | 0.7314 | 7.4855  | -3.3554 | Down | 8.13E-09 | 2.16E-08 |
| Unigene103690 | Potri.016G029700.1 | 0.3486 | 3.5678  | -3.3554 | Down | 6.06E-05 | 1.19E-04 |
| Unigene117860 | Potri.015G079900.3 | 1.3459 | 13.7748 | -3.3554 | Down | 9.41E-28 | 5.35E-27 |
| Unigene112912 | Potri.011G113900.1 | 0.3008 | 3.0787  | -3.3554 | Down | 6.06E-05 | 1.19E-04 |
| Unigene113417 | Potri.010G235700.1 | 1.7622 | 18.0359 | -3.3554 | Down | 5.51E-24 | 2.79E-23 |
| Unigene19206  | Potri.008G009100.1 | 1.181  | 12.0874 | -3.3554 | Down | 5.51E-24 | 2.79E-23 |
| Unigene96125  | Potri.007G063300.1 | 0.5226 | 5.3486  | -3.3554 | Down | 1.98E-16 | 7.68E-16 |
| Unigene76265  | Potri.007G053800.1 | 5.6364 | 57.6881 | -3.3554 | Down | 2.72E-65 | 3.55E-64 |
| Unigene26460  | Potri.007G031800.2 | 0.3639 | 3.7245  | -3.3554 | Down | 6.06E-05 | 1.19E-04 |
| Unigene118456 | Potri.007G003900.1 | 0.3368 | 3.447   | -3.3554 | Down | 8.13E-09 | 2.16E-08 |
| Unigene108052 | Potri.007G003100.2 | 0.7278 | 7.449   | -3.3554 | Down | 8.13E-09 | 2.16E-08 |
| Unigene104122 | Potri.005G046100.1 | 0.3816 | 3.9055  | -3.3554 | Down | 8.13E-09 | 2.16E-08 |
| Unigene111772 | Potri.003G142300.3 | 0.3161 | 3.2352  | -3.3554 | Down | 6.06E-05 | 1.19E-04 |
| Unigene108122 | Potri.002G111400.1 | 0.3639 | 3.7245  | -3.3554 | Down | 6.06E-05 | 1.19E-04 |
| Unigene27020  | Potri.001G222400.2 | 0.6602 | 6.7568  | -3.3554 | Down | 8.13E-09 | 2.16E-08 |
| Unigene26093  | Potri.018G040200.1 | 0.4699 | 4.8096  | -3.3555 | Down | 1.98E-16 | 7.68E-16 |
| Unigene14963  | Potri.001G321000.1 | 0.5341 | 5.4667  | -3.3555 | Down | 1.23E-12 | 4.04E-12 |
| Unigene5210   | Potri.T014200.2    | 0.333  | 3.4086  | -3.3556 | Down | 6.06E-05 | 1.19E-04 |
| Unigene96485  | Potri.017G034700.2 | 0.333  | 3.4086  | -3.3556 | Down | 6.06E-05 | 1.19E-04 |
| Unigene110470 | Potri.012G121700.7 | 0.333  | 3.4086  | -3.3556 | Down | 6.06E-05 | 1.19E-04 |
| Unigene107458 | Potri.012G054200.3 | 0.3711 | 3.7986  | -3.3556 | Down | 6.06E-05 | 1.19E-04 |
| Unigene116337 | Potri.010G114600.2 | 0.4736 | 4.8477  | -3.3556 | Down | 8.13E-09 | 2.16E-08 |
| Unigene109263 | Potri.007G092100.1 | 0.3502 | 3.5846  | -3.3556 | Down | 6.06E-05 | 1.19E-04 |
| Unigene109206 | Potri.005G243800.1 | 0.3502 | 3.5846  | -3.3556 | Down | 6.06E-05 | 1.19E-04 |

|               |                    |         |          |         |      |           |           |
|---------------|--------------------|---------|----------|---------|------|-----------|-----------|
| Unigene111190 | Potri.002G187600.1 | 0.3243  | 3.3196   | -3.3556 | Down | 6.06E-05  | 1.19E-04  |
| Unigene108831 | Potri.001G392900.1 | 0.3552  | 3.6358   | -3.3556 | Down | 6.06E-05  | 1.19E-04  |
| Unigene40532  | Potri.001G272400.1 | 0.5839  | 5.9767   | -3.3556 | Down | 1.98E-16  | 7.68E-16  |
| Unigene38096  | Potri.003G094000.1 | 26.6034 | 272.4321 | -3.3562 | Down | 0         | 0         |
| Unigene51510  | Potri.019G031400.1 | 5.0254  | 51.4948  | -3.3571 | Down | 4.97E-86  | 8.85E-85  |
| Unigene64364  | Potri.004G121800.1 | 6.072   | 62.2637  | -3.3581 | Down | 9.33E-107 | 2.16E-105 |
| Unigene84687  | Potri.017G076800.1 | 10.7518 | 110.2591 | -3.3582 | Down | 1.17E-153 | 4.33E-152 |
| Unigene22501  | Potri.003G174600.3 | 1.447   | 14.8385  | -3.3582 | Down | 2.63E-52  | 2.69E-51  |
| Unigene39785  | Potri.001G039600.1 | 1.3972  | 14.3332  | -3.3588 | Down | 8.38E-45  | 7.32E-44  |
| Unigene76889  | Potri.008G212500.1 | 3.4355  | 35.2502  | -3.359  | Down | 4.76E-41  | 3.83E-40  |
| Unigene16872  | Potri.010G094700.5 | 4.2226  | 43.3444  | -3.3596 | Down | 2.59E-69  | 3.60E-68  |
| Unigene13323  | Potri.014G054100.1 | 1.3162  | 13.517   | -3.3603 | Down | 2.95E-118 | 7.79E-117 |
| Unigene23477  | Potri.012G071400.1 | 1.1648  | 11.9621  | -3.3603 | Down | 4.76E-90  | 8.92E-89  |
| Unigene100608 | Potri.010G086700.1 | 1.1168  | 11.47    | -3.3604 | Down | 8.99E-30  | 5.42E-29  |
| Unigene33289  | Potri.009G148600.1 | 1.2225  | 12.5579  | -3.3607 | Down | 1.47E-82  | 2.49E-81  |
| Unigene25783  | Potri.006G044100.1 | 6.9559  | 71.4645  | -3.3609 | Down | 1.73E-131 | 5.21E-130 |
| Unigene5018   | Potri.005G054600.1 | 5.657   | 58.1224  | -3.361  | Down | 5.29E-233 | 3.30E-231 |
| Unigene51258  | Potri.012G051300.1 | 2.5405  | 26.1266  | -3.3623 | Down | 4.60E-43  | 3.87E-42  |
| Unigene25252  | Potri.001G265900.2 | 1.1893  | 12.2303  | -3.3623 | Down | 3.09E-22  | 1.48E-21  |
| Unigene37029  | Potri.006G084900.3 | 5.9305  | 61.0344  | -3.3634 | Down | 2.47E-73  | 3.66E-72  |
| Unigene105905 | Potri.016G041000.1 | 1.0021  | 10.3162  | -3.3638 | Down | 1.85E-18  | 7.77E-18  |
| Unigene30062  | Potri.008G049600.1 | 4.2226  | 43.4708  | -3.3638 | Down | 1.38E-69  | 1.92E-68  |
| Unigene30723  | Potri.006G204100.4 | 1.2862  | 13.2411  | -3.3638 | Down | 1.40E-52  | 1.44E-51  |
| Unigene38269  | Potri.017G016600.1 | 0.6874  | 7.0839   | -3.3653 | Down | 4.45E-45  | 3.91E-44  |
| Unigene32497  | Potri.004G049800.1 | 6.0486  | 62.3319  | -3.3653 | Down | 2.84E-262 | 2.09E-260 |
| Unigene15910  | Potri.010G159900.1 | 1.6773  | 17.296   | -3.3662 | Down | 2.53E-41  | 2.05E-40  |
| Unigene40679  | Potri.007G051800.2 | 0.3851  | 3.9711   | -3.3662 | Down | 1.13E-14  | 4.07E-14  |
| Unigene16596  | Potri.002G178200.1 | 0.7418  | 7.6489   | -3.3662 | Down | 1.13E-14  | 4.07E-14  |
| Unigene48969  | Potri.006G184100.1 | 0.5428  | 5.5975   | -3.3663 | Down | 1.13E-14  | 4.07E-14  |
| Unigene27520  | Potri.001G450500.1 | 0.4463  | 4.6024   | -3.3663 | Down | 1.13E-14  | 4.07E-14  |
| Unigene48165  | Potri.005G117100.2 | 6.0668  | 62.5776  | -3.3666 | Down | 7.75E-104 | 1.73E-102 |
| Unigene118636 | Potri.012G038900.1 | 1.5241  | 15.7284  | -3.3673 | Down | 1.44E-37  | 1.07E-36  |
| Unigene77196  | Potri.017G032800.1 | 86.2755 | 890.7138 | -3.3679 | Down | 0         | 0         |
| Unigene41559  | Potri.016G049300.1 | 0.9523  | 9.8326   | -3.3681 | Down | 2.92E-24  | 1.50E-23  |
| Unigene99747  | Potri.010G132700.1 | 1.2902  | 13.3319  | -3.3692 | Down | 2.44E-43  | 2.07E-42  |
| Unigene20180  | Potri.007G002700.1 | 1.0561  | 10.9126  | -3.3692 | Down | 2.44E-43  | 2.07E-42  |
| Unigene10996  | Potri.017G086200.1 | 2.8732  | 29.6997  | -3.3697 | Down | 3.22E-212 | 1.79E-210 |
| Unigene17690  | Potri.002G205500.1 | 3.3702  | 34.837   | -3.3697 | Down | 4.47E-142 | 1.49E-140 |
| Unigene66319  | Potri.005G157100.2 | 3.0278  | 31.3014  | -3.3699 | Down | 7.14E-91  | 1.35E-89  |

|               |                    |         |          |         |      |           |           |
|---------------|--------------------|---------|----------|---------|------|-----------|-----------|
| Unigene35991  | Potri.003G083300.3 | 0.7146  | 7.3904   | -3.3704 | Down | 7.22E-11  | 2.16E-10  |
| Unigene103749 | Potri.002G046300.1 | 0.5669  | 5.8629   | -3.3704 | Down | 7.22E-11  | 2.17E-10  |
| Unigene98598  | Potri.009G160700.1 | 0.8289  | 8.5728   | -3.3705 | Down | 1.73E-20  | 7.85E-20  |
| Unigene21957  | Potri.005G144100.1 | 3.3523  | 34.6715  | -3.3705 | Down | 2.40E-286 | 2.01E-284 |
| Unigene119112 | Potri.011G141000.1 | 0.3215  | 3.3257   | -3.3708 | Down | 7.22E-11  | 2.16E-10  |
| Unigene22609  | Potri.002G127100.2 | 3.544   | 36.68    | -3.3715 | Down | 1.27E-117 | 3.34E-116 |
| Unigene93593  | Potri.006G275000.5 | 34.3971 | 356.2112 | -3.3724 | Down | 0         | 0         |
| Unigene77906  | Potri.001G253300.2 | 2.0722  | 21.4665  | -3.3729 | Down | 2.78E-26  | 1.51E-25  |
| Unigene82243  | Potri.004G186200.1 | 6.4557  | 66.9238  | -3.3739 | Down | 2.10E-87  | 3.82E-86  |
| Unigene44512  | Potri.005G098200.1 | 7.2172  | 74.8312  | -3.3741 | Down | 0         | 0         |
| Unigene37475  | Potri.006G135100.1 | 0.5092  | 5.2803   | -3.3743 | Down | 1.05E-16  | 4.11E-16  |
| Unigene5504   | Potri.001G392800.1 | 0.8649  | 8.9689   | -3.3743 | Down | 1.05E-16  | 4.11E-16  |
| Unigene103021 | Potri.015G010000.1 | 1.1851  | 12.2975  | -3.3753 | Down | 7.65E-38  | 5.70E-37  |
| Unigene62287  | Potri.010G074300.1 | 4.1444  | 43.0131  | -3.3755 | Down | 6.80E-59  | 7.93E-58  |
| Unigene107041 | Potri.007G127000.1 | 0.4711  | 4.8905   | -3.3759 | Down | 1.64E-22  | 7.91E-22  |
| Unigene107033 | Potri.018G019900.1 | 0.8425  | 8.7467   | -3.376  | Down | 1.64E-22  | 7.91E-22  |
| Unigene45821  | Potri.001G079600.1 | 1.6153  | 16.7702  | -3.376  | Down | 1.64E-22  | 7.91E-22  |
| Unigene58611  | Potri.015G037400.1 | 0.946   | 9.8279   | -3.377  | Down | 2.65E-28  | 1.53E-27  |
| Unigene15429  | Potri.008G005200.1 | 0.7782  | 8.085    | -3.377  | Down | 2.65E-28  | 1.53E-27  |
| Unigene91591  | Potri.017G107500.1 | 85.5798 | 889.4263 | -3.3775 | Down | 0         | 0         |
| Unigene39362  | Potri.018G090300.1 | 1.5699  | 16.3307  | -3.3788 | Down | 3.71E-57  | 4.19E-56  |
| Unigene102483 | Potri.019G076300.1 | 0.4908  | 5.1113   | -3.3805 | Down | 4.97E-07  | 1.17E-06  |
| Unigene98879  | Potri.015G029200.3 | 0.6741  | 7.0203   | -3.3805 | Down | 7.12E-42  | 5.84E-41  |
| Unigene100175 | Potri.012G092400.1 | 0.4371  | 4.5522   | -3.3805 | Down | 4.97E-07  | 1.17E-06  |
| Unigene4106   | Potri.006G004000.1 | 0.5666  | 5.9006   | -3.3805 | Down | 6.54E-13  | 2.17E-12  |
| Unigene13223  | Potri.005G139100.1 | 4.4293  | 46.1293  | -3.3805 | Down | 3.68E-220 | 2.14E-218 |
| Unigene102426 | Potri.004G231500.1 | 0.5666  | 5.9006   | -3.3805 | Down | 6.54E-13  | 2.17E-12  |
| Unigene115358 | Potri.003G179100.1 | 0.3899  | 4.0605   | -3.3805 | Down | 4.97E-07  | 1.17E-06  |
| Unigene4060   | Potri.T156100.1    | 0.5485  | 5.7126   | -3.3806 | Down | 4.97E-07  | 1.17E-06  |
| Unigene106675 | Potri.015G120400.4 | 0.6286  | 6.547    | -3.3806 | Down | 6.54E-13  | 2.17E-12  |
| Unigene109042 | Potri.010G145900.3 | 0.5303  | 5.5231   | -3.3806 | Down | 4.97E-07  | 1.17E-06  |
| Unigene56096  | Potri.001G267400.2 | 0.5086  | 5.2971   | -3.3806 | Down | 4.97E-07  | 1.17E-06  |
| Unigene115806 | Potri.003G059700.1 | 0.3742  | 3.8976   | -3.3807 | Down | 4.97E-07  | 1.17E-06  |
| Unigene54443  | Potri.010G220600.4 | 4.6771  | 48.7513  | -3.3818 | Down | 1.87E-78  | 3.00E-77  |
| Unigene11069  | Potri.003G012100.1 | 5.5751  | 58.1131  | -3.3818 | Down | 0         | 0         |
| Unigene102724 | Potri.016G007300.1 | 0.9071  | 9.4599   | -3.3825 | Down | 1.18E-49  | 1.14E-48  |
| Unigene45859  | Potri.007G029200.1 | 1.0237  | 10.6839  | -3.3836 | Down | 2.43E-32  | 1.57E-31  |
| Unigene119542 | Potri.011G124900.1 | 0.4246  | 4.4337   | -3.3843 | Down | 1.47E-26  | 8.09E-26  |
| Unigene119440 | Potri.001G133800.2 | 0.6177  | 6.4501   | -3.3843 | Down | 1.47E-26  | 8.09E-26  |



|               |                     |         |         |         |      |           |           |
|---------------|---------------------|---------|---------|---------|------|-----------|-----------|
| Unigene30228  | Potri.013G047900.1  | 8.0514  | 84.088  | -3.3846 | Down | 5.44E-96  | 1.10E-94  |
| Unigene22963  | Potri.005G255000.1  | 2.6527  | 27.7039 | -3.3846 | Down | 5.44E-96  | 1.10E-94  |
| Unigene104143 | Potri.009G064800.1  | 0.5261  | 5.4978  | -3.3854 | Down | 9.19E-21  | 4.20E-20  |
| Unigene67060  | Potri.019G112000.1  | 1.498   | 15.6545 | -3.3855 | Down | 9.19E-21  | 4.20E-20  |
| Unigene107790 | Potri.003G068000.10 | 1.8374  | 19.2018 | -3.3855 | Down | 9.19E-21  | 4.20E-20  |
| Unigene12351  | Potri.001G126400.2  | 1.4146  | 14.7837 | -3.3855 | Down | 2.91E-117 | 7.61E-116 |
| Unigene39706  | Potri.001G318500.1  | 3.566   | 37.2707 | -3.3857 | Down | 2.84E-169 | 1.20E-167 |
| Unigene11397  | Potri.006G134600.1  | 5.1665  | 54.0102 | -3.386  | Down | 0         | 0         |
| Unigene21579  | Potri.001G246200.1  | 5.0663  | 52.9676 | -3.3861 | Down | 0         | 0         |
| Unigene42907  | Potri.015G145400.1  | 1.5085  | 15.7745 | -3.3864 | Down | 5.21E-100 | 1.12E-98  |
| Unigene75533  | Potri.017G059700.1  | 3.5443  | 37.094  | -3.3876 | Down | 3.78E-42  | 3.12E-41  |
| Unigene51595  | Potri.017G029700.1  | 0.5417  | 5.6693  | -3.3876 | Down | 6.00E-15  | 2.18E-14  |
| Unigene47441  | Potri.011G040700.1  | 1.2538  | 13.1217 | -3.3876 | Down | 1.08E-55  | 1.18E-54  |
| Unigene16012  | Potri.007G043300.4  | 0.8703  | 9.1086  | -3.3876 | Down | 6.00E-15  | 2.18E-14  |
| Unigene105186 | Potri.016G001300.1  | 0.9358  | 9.7942  | -3.3877 | Down | 6.00E-15  | 2.18E-14  |
| Unigene97665  | Potri.008G066400.3  | 0.8631  | 9.0334  | -3.3877 | Down | 1.40E-28  | 8.18E-28  |
| Unigene1303   | Potri.001G229200.1  | 1.3664  | 14.3138 | -3.389  | Down | 1.60E-92  | 3.09E-91  |
| Unigene49644  | Potri.002G205500.1  | 1.5911  | 16.674  | -3.3895 | Down | 7.88E-172 | 3.37E-170 |
| Unigene54145  | Potri.001G060100.2  | 10.1594 | 106.483 | -3.3897 | Down | 4.54E-137 | 1.45E-135 |
| Unigene55133  | Potri.012G066600.3  | 1.358   | 14.2404 | -3.3904 | Down | 1.34E-30  | 8.29E-30  |
| Unigene51801  | Potri.004G090700.1  | 1.2803  | 13.4257 | -3.3904 | Down | 1.02E-59  | 1.20E-58  |
| Unigene99817  | Potri.017G139400.2  | 0.8909  | 9.3424  | -3.3905 | Down | 1.34E-30  | 8.29E-30  |
| Unigene24945  | Potri.006G027600.1  | 3.7081  | 38.8927 | -3.3907 | Down | 1.72E-67  | 2.33E-66  |
| Unigene45431  | Potri.008G069300.1  | 1.6435  | 17.2442 | -3.3913 | Down | 8.67E-91  | 1.64E-89  |
| Unigene94678  | Potri.008G087600.3  | 0.7105  | 7.463   | -3.3928 | Down | 4.29E-09  | 1.16E-08  |
| Unigene118697 | Potri.006G172400.1  | 0.3148  | 3.3064  | -3.3928 | Down | 4.29E-09  | 1.16E-08  |
| Unigene109134 | Potri.003G174000.1  | 0.7038  | 7.3926  | -3.3928 | Down | 4.29E-09  | 1.16E-08  |
| Unigene117961 | Potri.001G417400.1  | 0.3768  | 3.9576  | -3.3928 | Down | 4.29E-09  | 1.16E-08  |
| Unigene118722 | Potri.001G383600.1  | 0.6243  | 6.5574  | -3.3928 | Down | 5.56E-17  | 2.20E-16  |
| Unigene27467  | Potri.019G020100.1  | 2.0626  | 21.6667 | -3.3929 | Down | 8.22E-25  | 4.28E-24  |
| Unigene116800 | Potri.017G097000.1  | 0.4494  | 4.7206  | -3.3929 | Down | 4.29E-09  | 1.16E-08  |
| Unigene106684 | Potri.016G140000.5  | 0.6358  | 6.6785  | -3.3929 | Down | 8.22E-25  | 4.28E-24  |
| Unigene1630   | Potri.016G025100.2  | 1.5574  | 16.3593 | -3.3929 | Down | 2.80E-79  | 4.55E-78  |
| Unigene107122 | Potri.013G025600.2  | 0.5235  | 5.499   | -3.3929 | Down | 5.56E-17  | 2.20E-16  |
| Unigene106158 | Potri.007G119600.1  | 0.5319  | 5.5872  | -3.3929 | Down | 5.56E-17  | 2.20E-16  |
| Unigene7094   | Potri.006G151100.2  | 2.3393  | 24.5732 | -3.3929 | Down | 1.64E-71  | 2.36E-70  |
| Unigene117122 | Potri.006G130900.2  | 0.4312  | 4.5295  | -3.3929 | Down | 4.29E-09  | 1.16E-08  |
| Unigene96139  | Potri.016G097400.1  | 0.2931  | 3.079   | -3.393  | Down | 4.29E-09  | 1.16E-08  |
| Unigene111862 | Potri.015G003900.1  | 0.6295  | 6.6128  | -3.393  | Down | 4.29E-09  | 1.16E-08  |

|               |                    |         |          |         |      |           |           |
|---------------|--------------------|---------|----------|---------|------|-----------|-----------|
| Unigene118846 | Potri.006G122000.1 | 0.2966  | 3.1158   | -3.393  | Down | 4.29E-09  | 1.16E-08  |
| Unigene106811 | Potri.001G395100.1 | 0.6766  | 7.1076   | -3.393  | Down | 5.56E-17  | 2.20E-16  |
| Unigene10896  | Potri.T078300.1    | 1.9752  | 20.7558  | -3.3934 | Down | 6.42E-285 | 5.29E-283 |
| Unigene37679  | Potri.009G113300.1 | 5.7153  | 60.0618  | -3.3935 | Down | 2.45E-112 | 6.06E-111 |
| Unigene38573  | Potri.002G185700.1 | 8.3038  | 87.2856  | -3.3939 | Down | 0         | 0         |
| Unigene118435 | Potri.014G146200.2 | 2.1145  | 22.234   | -3.3944 | Down | 3.31E-50  | 3.25E-49  |
| Unigene54331  | Potri.001G124200.1 | 8.3258  | 87.5463  | -3.3944 | Down | 2.20E-147 | 7.72E-146 |
| Unigene12784  | Potri.005G157200.1 | 3.4878  | 36.6886  | -3.3949 | Down | 1.23E-141 | 4.09E-140 |
| Unigene87656  | Potri.007G130100.2 | 31.804  | 334.5828 | -3.3951 | Down | 0         | 0         |
| Unigene106365 | Potri.010G170200.1 | 0.9351  | 9.8504   | -3.397  | Down | 5.18E-19  | 2.23E-18  |
| Unigene17609  | Potri.011G017900.1 | 0.8904  | 9.3801   | -3.3971 | Down | 5.18E-19  | 2.23E-18  |
| Unigene89691  | Potri.001G159800.1 | 13.6386 | 143.7094 | -3.3974 | Down | 9.35E-259 | 6.77E-257 |
| Unigene113799 | Potri.005G081200.1 | 2.0084  | 21.1745  | -3.3982 | Down | 7.44E-29  | 4.37E-28  |
| Unigene96519  | Potri.014G069100.5 | 0.8368  | 8.8227   | -3.3983 | Down | 7.44E-29  | 4.37E-28  |
| Unigene117939 | Potri.001G144300.1 | 2.2721  | 23.9683  | -3.399  | Down | 1.81E-48  | 1.72E-47  |
| Unigene34110  | Potri.001G010700.2 | 2.2349  | 23.5797  | -3.3993 | Down | 2.94E-58  | 3.39E-57  |
| Unigene89448  | Potri.010G155100.2 | 19.9071 | 210.0693 | -3.3995 | Down | 0         | 0         |
| Unigene92338  | Potri.003G166500.2 | 66.1689 | 698.4    | -3.3998 | Down | 0         | 0         |
| Unigene116877 | Potri.003G177700.3 | 0.5551  | 5.8603   | -3.4002 | Down | 3.82E-11  | 1.16E-10  |
| Unigene99924  | Potri.001G449100.4 | 0.3272  | 3.4545   | -3.4002 | Down | 3.82E-11  | 1.16E-10  |
| Unigene23557  | Potri.017G093700.2 | 2.5162  | 26.5669  | -3.4003 | Down | 9.81E-168 | 4.07E-166 |
| Unigene14811  | Potri.003G196600.1 | 0.6431  | 6.7899   | -3.4003 | Down | 3.82E-11  | 1.16E-10  |
| Unigene118208 | Potri.002G212900.1 | 0.4483  | 4.7334   | -3.4003 | Down | 3.82E-11  | 1.16E-10  |
| Unigene107132 | Potri.001G089600.1 | 0.3124  | 3.2983   | -3.4003 | Down | 3.82E-11  | 1.16E-10  |
| Unigene45014  | Potri.001G034700.1 | 1.5486  | 16.3506  | -3.4003 | Down | 4.72E-70  | 6.64E-69  |
| Unigene15180  | Potri.001G005100.1 | 2.6931  | 28.4343  | -3.4003 | Down | 1.10E-40  | 8.77E-40  |
| Unigene116756 | Potri.T023200.2    | 0.5634  | 5.9489   | -3.4004 | Down | 3.82E-11  | 1.16E-10  |
| Unigene119047 | Potri.018G103800.4 | 0.3354  | 3.5415   | -3.4004 | Down | 3.82E-11  | 1.16E-10  |
| Unigene35791  | Potri.016G057800.1 | 0.6258  | 6.6076   | -3.4004 | Down | 3.82E-11  | 1.16E-10  |
| Unigene2971   | Potri.001G179700.1 | 1.6967  | 17.92    | -3.4008 | Down | 6.36E-121 | 1.73E-119 |
| Unigene15167  | Potri.006G038900.1 | 1.4559  | 15.3869  | -3.4017 | Down | 1.06E-42  | 8.86E-42  |
| Unigene16926  | Potri.016G025100.2 | 2.4495  | 25.9105  | -3.403  | Down | 1.03E-44  | 8.94E-44  |
| Unigene34372  | Potri.006G221000.1 | 1.8956  | 20.0607  | -3.4036 | Down | 8.15E-190 | 3.98E-188 |
| Unigene12286  | Potri.001G296200.1 | 0.9831  | 10.4045  | -3.4037 | Down | 2.57E-68  | 3.51E-67  |
| Unigene119527 | Potri.011G082300.1 | 0.5893  | 6.2369   | -3.4038 | Down | 6.54E-35  | 4.51E-34  |
| Unigene47980  | Potri.005G211700.1 | 0.5157  | 5.463    | -3.4051 | Down | 3.46E-13  | 1.16E-12  |
| Unigene36568  | Potri.008G193500.1 | 0.8382  | 8.8799   | -3.4052 | Down | 3.46E-13  | 1.16E-12  |
| Unigene103922 | Potri.004G162700.1 | 0.5874  | 6.2229   | -3.4052 | Down | 3.46E-13  | 1.16E-12  |
| Unigene111309 | Potri.001G340600.1 | 0.9688  | 10.2638  | -3.4052 | Down | 3.46E-13  | 1.16E-12  |

|               |                     |         |          |         |      |           |           |
|---------------|---------------------|---------|----------|---------|------|-----------|-----------|
| Unigene103589 | Potri.006G062300.5  | 0.4731  | 5.0125   | -3.4053 | Down | 3.46E-13  | 1.16E-12  |
| Unigene95444  | Potri.017G115200.1  | 0.8493  | 9.0032   | -3.4061 | Down | 9.30E-51  | 9.23E-50  |
| Unigene94640  | Potri.018G038500.1  | 1.2477  | 13.23    | -3.4065 | Down | 6.05E-39  | 4.62E-38  |
| Unigene117371 | Potri.001G439600.1  | 1.9796  | 20.9906  | -3.4065 | Down | 6.05E-39  | 4.62E-38  |
| Unigene35267  | Potri.002G154700.1  | 7.071   | 75.0378  | -3.4076 | Down | 2.21E-80  | 3.65E-79  |
| Unigene96725  | Potri.007G128300.4  | 0.4908  | 5.212    | -3.4086 | Down | 3.17E-15  | 1.17E-14  |
| Unigene39964  | Potri.002G010500.1  | 0.9956  | 10.573   | -3.4087 | Down | 8.50E-57  | 9.52E-56  |
| Unigene49424  | Potri.001G351200.2  | 8.1148  | 86.1988  | -3.409  | Down | 5.44E-114 | 1.37E-112 |
| Unigene33354  | Potri.002G160200.1  | 3.985   | 42.3319  | -3.4091 | Down | 1.14E-198 | 5.88E-197 |
| Unigene62784  | Potri.006G229200.2  | 5.1646  | 54.8683  | -3.4092 | Down | 1.45E-143 | 4.89E-142 |
| Unigene103759 | Potri.014G148800.1  | 0.9754  | 10.3634  | -3.4094 | Down | 8.26E-59  | 9.61E-58  |
| Unigene1372   | Potri.017G085000.1  | 0.7243  | 7.7054   | -3.4112 | Down | 3.61E-33  | 2.39E-32  |
| Unigene26772  | Potri.017G150000.1  | 0.4924  | 5.2387   | -3.4113 | Down | 2.94E-17  | 1.18E-16  |
| Unigene43947  | Potri.012G060900.1  | 0.9116  | 9.6985   | -3.4113 | Down | 5.09E-49  | 4.86E-48  |
| Unigene47159  | Potri.005G174000.1  | 0.9868  | 10.5034  | -3.412  | Down | 4.93E-51  | 4.91E-50  |
| Unigene40938  | Potri.002G054100.2  | 1.5541  | 16.5468  | -3.4124 | Down | 3.46E-35  | 2.41E-34  |
| Unigene118620 | Potri.T059800.1     | 2.0991  | 22.3541  | -3.4127 | Down | 4.78E-53  | 4.97E-52  |
| Unigene116878 | Potri.019G091700.1  | 0.9991  | 10.6443  | -3.4133 | Down | 2.74E-19  | 1.19E-18  |
| Unigene99378  | Potri.018G124400.2  | 1.7952  | 19.1256  | -3.4133 | Down | 3.33E-37  | 2.44E-36  |
| Unigene76757  | Potri.006G273600.1  | 4.4365  | 47.2663  | -3.4133 | Down | 4.64E-55  | 5.02E-54  |
| Unigene30369  | Potri.004G123900.1  | 1.576   | 16.791   | -3.4133 | Down | 4.64E-55  | 5.02E-54  |
| Unigene1828   | Potri.014G060500.1  | 1.6562  | 17.6489  | -3.4136 | Down | 1.02E-92  | 1.98E-91  |
| Unigene119363 | Potri.008G189500.3  | 0.5217  | 5.5641   | -3.4149 | Down | 2.58E-21  | 1.20E-20  |
| Unigene4815   | Potri.007G043700.1  | 0.7628  | 8.1357   | -3.4149 | Down | 2.58E-21  | 1.20E-20  |
| Unigene118811 | Potri.015G117200.1  | 1.504   | 16.0417  | -3.415  | Down | 3.09E-41  | 2.49E-40  |
| Unigene29110  | Potri.006G047500.1  | 2.7728  | 29.5865  | -3.4155 | Down | 2.12E-146 | 7.38E-145 |
| Unigene16832  | Potri.017G001400.1  | 19.5854 | 208.9899 | -3.4156 | Down | 0         | 0         |
| Unigene102626 | Potri.014G002800.1  | 0.8495  | 9.0687   | -3.4162 | Down | 2.43E-23  | 1.21E-22  |
| Unigene84572  | Potri.002G079900.1  | 50.4876 | 539.1993 | -3.4168 | Down | 0         | 0         |
| Unigene19725  | Potri.016G104400.1  | 0.9248  | 9.8802   | -3.4173 | Down | 2.30E-25  | 1.22E-24  |
| Unigene106070 | Potri.016G083600.1  | 1.5089  | 16.1261  | -3.4178 | Down | 2.61E-51  | 2.62E-50  |
| Unigene9719   | Potri.006G199500.1  | 8.8478  | 94.5754  | -3.4181 | Down | 4.85E-103 | 1.08E-101 |
| Unigene39292  | Potri.005G083900.1  | 2.1157  | 22.6253  | -3.4187 | Down | 2.45E-55  | 2.67E-54  |
| Unigene44407  | Potri.003G028700.1  | 11.868  | 127.0857 | -3.4207 | Down | 0         | 0         |
| Unigene24875  | Potri.007G111900.2  | 1.5054  | 16.1281  | -3.4214 | Down | 1.76E-37  | 1.30E-36  |
| Unigene104872 | Potri.017G070800.1  | 0.9645  | 10.3344  | -3.4215 | Down | 2.36E-111 | 5.80E-110 |
| Unigene35770  | Potri.012G090800.1  | 5.9305  | 63.5565  | -3.4218 | Down | 1.83E-77  | 2.89E-76  |
| Unigene30840  | Potri.007G078100.1  | 6.2812  | 67.3374  | -3.4223 | Down | 2.74E-163 | 1.10E-161 |
| Unigene81950  | Potri.001G146200.10 | 17.4932 | 187.531  | -3.4223 | Down | 5.06E-243 | 3.36E-241 |

|               |                    |         |          |         |      |           |           |
|---------------|--------------------|---------|----------|---------|------|-----------|-----------|
| Unigene31117  | Potri.008G041400.1 | 12.2468 | 131.34   | -3.4228 | Down | 0         | 0         |
| Unigene2931   | Potri.014G023100.1 | 1.9869  | 21.3089  | -3.4229 | Down | 1.52E-45  | 1.35E-44  |
| Unigene18266  | Potri.013G041200.1 | 4.9145  | 52.7431  | -3.4239 | Down | 1.53E-157 | 5.84E-156 |
| Unigene79691  | Potri.012G043200.1 | 15.0426 | 161.5677 | -3.425  | Down | 1.08E-197 | 5.56E-196 |
| Unigene32595  | Potri.015G005100.1 | 1.7553  | 18.8551  | -3.4252 | Down | 9.71E-138 | 3.12E-136 |
| Unigene612    | Potri.008G028700.1 | 3.1813  | 34.1748  | -3.4252 | Down | 9.53E-140 | 3.11E-138 |
| Unigene41689  | Potri.005G181600.1 | 8.921   | 95.8845  | -3.426  | Down | 6.85E-256 | 4.88E-254 |
| Unigene28656  | Potri.010G125800.1 | 3.1652  | 34.0337  | -3.4266 | Down | 7.20E-104 | 1.61E-102 |
| Unigene90481  | Potri.009G038800.1 | 33.0256 | 355.2833 | -3.4273 | Down | 0         | 0         |
| Unigene100820 | Potri.T087700.1    | 0.3536  | 3.809    | -3.4292 | Down | 2.26E-09  | 6.23E-09  |
| Unigene112769 | Potri.018G052000.1 | 0.4549  | 4.9006   | -3.4293 | Down | 2.62E-07  | 6.30E-07  |
| Unigene106609 | Potri.015G140600.1 | 0.5812  | 6.2612   | -3.4293 | Down | 1.28E-23  | 6.43E-23  |
| Unigene119464 | Potri.010G241600.1 | 0.4045  | 4.3574   | -3.4293 | Down | 1.45E-19  | 6.35E-19  |
| Unigene115575 | Potri.008G116000.1 | 0.511   | 5.5048   | -3.4293 | Down | 2.26E-09  | 6.23E-09  |
| Unigene95427  | Potri.007G092800.2 | 0.3506  | 3.7768   | -3.4293 | Down | 2.01E-11  | 6.21E-11  |
| Unigene95570  | Potri.007G043300.4 | 0.3768  | 4.0591   | -3.4293 | Down | 2.26E-09  | 6.23E-09  |
| Unigene115842 | Potri.005G255600.1 | 0.3718  | 4.0052   | -3.4293 | Down | 2.62E-07  | 6.30E-07  |
| Unigene3484   | Potri.005G036700.1 | 0.5375  | 5.7904   | -3.4293 | Down | 2.01E-11  | 6.21E-11  |
| Unigene97766  | Potri.002G118400.1 | 0.5058  | 5.4488   | -3.4293 | Down | 2.26E-09  | 6.23E-09  |
| Unigene96760  | Potri.T163300.1    | 0.3657  | 3.9397   | -3.4294 | Down | 3.18E-05  | 6.41E-05  |
| Unigene48558  | Potri.T061600.1    | 0.9248  | 9.9633   | -3.4294 | Down | 1.82E-13  | 6.21E-13  |
| Unigene35276  | Potri.018G058300.1 | 0.3422  | 3.6867   | -3.4294 | Down | 3.18E-05  | 6.41E-05  |
| Unigene108479 | Potri.016G136500.2 | 0.3604  | 3.8826   | -3.4294 | Down | 3.18E-05  | 6.41E-05  |
| Unigene11864  | Potri.016G125400.1 | 8.2167  | 88.5239  | -3.4294 | Down | 6.00E-307 | 5.46E-305 |
| Unigene111820 | Potri.016G090000.2 | 0.3161  | 3.4055   | -3.4294 | Down | 3.18E-05  | 6.41E-05  |
| Unigene109898 | Potri.016G075700.2 | 0.5133  | 5.5301   | -3.4294 | Down | 2.62E-07  | 6.30E-07  |
| Unigene31598  | Potri.016G053300.4 | 0.9957  | 10.7271  | -3.4294 | Down | 1.16E-27  | 6.56E-27  |
| Unigene113952 | Potri.016G032000.1 | 1.566   | 16.8717  | -3.4294 | Down | 1.28E-23  | 6.43E-23  |
| Unigene100316 | Potri.016G011600.1 | 0.659   | 7.0999   | -3.4294 | Down | 2.01E-11  | 6.21E-11  |
| Unigene106448 | Potri.015G105700.1 | 0.317   | 3.4152   | -3.4294 | Down | 2.62E-07  | 6.30E-07  |
| Unigene96582  | Potri.015G077100.1 | 0.7886  | 8.4958   | -3.4294 | Down | 6.31E-62  | 7.75E-61  |
| Unigene116253 | Potri.015G076700.1 | 0.4767  | 5.1355   | -3.4294 | Down | 2.26E-09  | 6.23E-09  |
| Unigene109790 | Potri.015G040900.1 | 0.3422  | 3.6867   | -3.4294 | Down | 3.18E-05  | 6.41E-05  |
| Unigene31760  | Potri.013G140100.1 | 0.8435  | 9.0871   | -3.4294 | Down | 1.45E-19  | 6.35E-19  |
| Unigene112666 | Potri.013G106500.1 | 0.3045  | 3.2804   | -3.4294 | Down | 3.18E-05  | 6.41E-05  |
| Unigene16207  | Potri.013G080700.1 | 1.1841  | 12.7572  | -3.4294 | Down | 1.36E-21  | 6.39E-21  |
| Unigene108379 | Potri.012G095500.1 | 0.901   | 9.7066   | -3.4294 | Down | 2.01E-11  | 6.21E-11  |
| Unigene117200 | Potri.012G019700.1 | 0.4263  | 4.5926   | -3.4294 | Down | 2.26E-09  | 6.23E-09  |
| Unigene4345   | Potri.011G009700.3 | 0.6431  | 6.9285   | -3.4294 | Down | 2.01E-11  | 6.21E-11  |

|               |                    |         |          |         |      |           |           |
|---------------|--------------------|---------|----------|---------|------|-----------|-----------|
| Unigene108316 | Potri.010G133600.1 | 0.5432  | 5.8522   | -3.4294 | Down | 2.62E-07  | 6.30E-07  |
| Unigene118868 | Potri.010G120800.1 | 0.7314  | 7.8795   | -3.4294 | Down | 1.36E-21  | 6.39E-21  |
| Unigene102040 | Potri.010G039000.1 | 0.307   | 3.3074   | -3.4294 | Down | 3.18E-05  | 6.41E-05  |
| Unigene100371 | Potri.009G113500.1 | 0.3422  | 3.6867   | -3.4294 | Down | 3.18E-05  | 6.41E-05  |
| Unigene104505 | Potri.008G146100.3 | 0.614   | 6.6148   | -3.4294 | Down | 2.26E-09  | 6.23E-09  |
| Unigene4297   | Potri.007G044100.1 | 1.5253  | 16.4326  | -3.4294 | Down | 1.28E-23  | 6.43E-23  |
| Unigene115205 | Potri.006G252100.1 | 0.6567  | 7.0749   | -3.4294 | Down | 2.01E-11  | 6.21E-11  |
| Unigene114439 | Potri.006G199500.6 | 0.5526  | 5.9534   | -3.4294 | Down | 2.26E-09  | 6.23E-09  |
| Unigene104408 | Potri.006G045400.2 | 0.4137  | 4.4568   | -3.4294 | Down | 1.82E-13  | 6.21E-13  |
| Unigene102686 | Potri.003G040800.2 | 0.3693  | 3.9787   | -3.4294 | Down | 2.62E-07  | 6.30E-07  |
| Unigene109939 | Potri.001G403300.3 | 0.8516  | 9.1747   | -3.4294 | Down | 2.01E-11  | 6.21E-11  |
| Unigene106281 | Potri.001G060100.2 | 0.5874  | 6.3284   | -3.4294 | Down | 1.82E-13  | 6.21E-13  |
| Unigene117228 | Potri.017G101600.3 | 0.5313  | 5.7244   | -3.4295 | Down | 2.01E-11  | 6.21E-11  |
| Unigene112870 | Potri.016G103400.1 | 0.302   | 3.2539   | -3.4295 | Down | 3.18E-05  | 6.41E-05  |
| Unigene106586 | Potri.016G082200.1 | 0.2858  | 3.0793   | -3.4295 | Down | 2.26E-09  | 6.23E-09  |
| Unigene98712  | Potri.009G070400.2 | 0.2869  | 3.0912   | -3.4295 | Down | 3.18E-05  | 6.41E-05  |
| Unigene30411  | Potri.006G273700.1 | 0.7435  | 8.0103   | -3.4295 | Down | 1.82E-13  | 6.21E-13  |
| Unigene113835 | Potri.005G039800.1 | 0.2869  | 3.0912   | -3.4295 | Down | 3.18E-05  | 6.41E-05  |
| Unigene96237  | Potri.002G176800.1 | 0.752   | 8.1019   | -3.4295 | Down | 2.01E-11  | 6.21E-11  |
| Unigene94705  | Potri.002G161500.1 | 0.2972  | 3.202    | -3.4295 | Down | 1.82E-13  | 6.21E-13  |
| Unigene15418  | Potri.001G100900.1 | 0.8674  | 9.3454   | -3.4295 | Down | 1.22E-25  | 6.49E-25  |
| Unigene117669 | Potri.001G083700.1 | 0.2976  | 3.2063   | -3.4295 | Down | 2.62E-07  | 6.30E-07  |
| Unigene98909  | Potri.001G015200.1 | 0.4458  | 4.803    | -3.4295 | Down | 2.62E-07  | 6.30E-07  |
| Unigene107469 | Potri.T004100.1    | 0.3711  | 3.9985   | -3.4296 | Down | 3.18E-05  | 6.41E-05  |
| Unigene111716 | Potri.014G106300.1 | 0.3174  | 3.42     | -3.4296 | Down | 3.18E-05  | 6.41E-05  |
| Unigene100805 | Potri.010G116200.1 | 0.336   | 3.6203   | -3.4296 | Down | 2.01E-11  | 6.21E-11  |
| Unigene109187 | Potri.009G030400.1 | 0.3502  | 3.7733   | -3.4296 | Down | 3.18E-05  | 6.41E-05  |
| Unigene104627 | Potri.008G028800.4 | 0.296   | 3.1893   | -3.4296 | Down | 2.62E-07  | 6.30E-07  |
| Unigene97590  | Potri.006G239300.1 | 0.2891  | 3.1151   | -3.4296 | Down | 3.18E-05  | 6.41E-05  |
| Unigene116828 | Potri.004G137000.2 | 0.336   | 3.6203   | -3.4296 | Down | 2.62E-07  | 6.30E-07  |
| Unigene26228  | Potri.016G045800.2 | 0.3032  | 3.2671   | -3.4297 | Down | 3.18E-05  | 6.41E-05  |
| Unigene84694  | Potri.010G066900.1 | 18.5834 | 200.497  | -3.4315 | Down | 2.34E-283 | 1.91E-281 |
| Unigene3612   | Potri.018G060300.1 | 5.3181  | 57.5308  | -3.4354 | Down | 3.68E-149 | 1.31E-147 |
| Unigene2128   | Potri.013G110100.3 | 2.5504  | 27.5916  | -3.4354 | Down | 3.99E-50  | 3.91E-49  |
| Unigene92811  | Potri.007G011000.5 | 34.2832 | 371.0196 | -3.4359 | Down | 0         | 0         |
| Unigene55622  | Potri.006G276900.2 | 7.4019  | 80.214   | -3.4379 | Down | 5.65E-105 | 1.28E-103 |
| Unigene42411  | Potri.010G014300.1 | 7.0943  | 76.9165  | -3.4386 | Down | 0         | 0         |
| Unigene91684  | Potri.010G130800.3 | 62.6253 | 679.065  | -3.4387 | Down | 0         | 0         |
| Unigene8470   | Potri.006G028600.2 | 3.1139  | 33.7672  | -3.4388 | Down | 6.29E-95  | 1.26E-93  |

|               |                    |         |          |         |      |           |           |
|---------------|--------------------|---------|----------|---------|------|-----------|-----------|
| Unigene119378 | Potri.007G132100.5 | 1.5477  | 16.7855  | -3.439  | Down | 1.76E-62  | 2.19E-61  |
| Unigene7618   | Potri.015G108200.1 | 6.4869  | 70.3577  | -3.4391 | Down | 1.70E-212 | 9.43E-211 |
| Unigene36710  | Potri.009G098500.1 | 2.0162  | 21.8769  | -3.4397 | Down | 5.83E-30  | 3.53E-29  |
| Unigene29622  | Potri.015G003700.2 | 1.8021  | 19.5614  | -3.4403 | Down | 2.86E-109 | 6.85E-108 |
| Unigene91044  | Potri.003G067500.1 | 30.9133 | 335.8406 | -3.4415 | Down | 0         | 0         |
| Unigene98799  | Potri.012G033700.1 | 0.8786  | 9.5515   | -3.4424 | Down | 6.78E-24  | 3.43E-23  |
| Unigene106416 | Potri.003G131000.1 | 0.606   | 6.5887   | -3.4426 | Down | 6.78E-24  | 3.43E-23  |
| Unigene99467  | Potri.016G123500.1 | 0.6463  | 7.0291   | -3.4431 | Down | 2.33E-44  | 2.01E-43  |
| Unigene43401  | Potri.006G151100.2 | 8.3797  | 91.1614  | -3.4435 | Down | 0         | 0         |
| Unigene12235  | Potri.001G472400.1 | 0.6085  | 6.6211   | -3.4437 | Down | 2.41E-42  | 2.00E-41  |
| Unigene47676  | Potri.018G055400.1 | 6.6261  | 72.1088  | -3.4439 | Down | 6.09E-183 | 2.84E-181 |
| Unigene119196 | Potri.003G083100.1 | 0.6045  | 6.5781   | -3.4439 | Down | 7.19E-22  | 3.40E-21  |
| Unigene28876  | Potri.011G118200.1 | 3.9221  | 42.686   | -3.4441 | Down | 1.65E-101 | 3.60E-100 |
| Unigene83653  | Potri.004G138200.1 | 19.5444 | 212.7888 | -3.4446 | Down | 5.79E-291 | 4.93E-289 |
| Unigene104605 | Potri.010G199300.2 | 0.8742  | 9.5231   | -3.4454 | Down | 7.65E-20  | 3.39E-19  |
| Unigene85778  | Potri.007G080600.7 | 33.0986 | 360.5696 | -3.4454 | Down | 0         | 0         |
| Unigene26702  | Potri.016G025600.1 | 0.5889  | 6.4155   | -3.4455 | Down | 7.65E-20  | 3.39E-19  |
| Unigene119028 | Potri.010G223200.1 | 0.6092  | 6.6368   | -3.4455 | Down | 7.65E-20  | 3.39E-19  |
| Unigene44028  | Potri.012G103700.2 | 0.9221  | 10.0512  | -3.4463 | Down | 8.35E-106 | 1.91E-104 |
| Unigene111845 | Potri.001G319600.2 | 2.6755  | 29.1639  | -3.4463 | Down | 2.71E-36  | 1.94E-35  |
| Unigene116083 | Potri.019G108700.1 | 0.972   | 10.6026  | -3.4473 | Down | 8.19E-18  | 3.36E-17  |
| Unigene13336  | Potri.011G109700.1 | 2.3496  | 25.6299  | -3.4473 | Down | 2.02E-83  | 3.47E-82  |
| Unigene37361  | Potri.002G026600.2 | 0.8065  | 8.7973   | -3.4473 | Down | 8.19E-18  | 3.36E-17  |
| Unigene103459 | Potri.018G005800.1 | 1.0544  | 11.5018  | -3.4474 | Down | 8.19E-18  | 3.36E-17  |
| Unigene42044  | Potri.014G157500.2 | 7.3779  | 80.4808  | -3.4474 | Down | 8.20E-149 | 2.91E-147 |
| Unigene28211  | Potri.003G216200.1 | 4.1588  | 45.3659  | -3.4474 | Down | 1.80E-132 | 5.49E-131 |
| Unigene41349  | Potri.009G110500.1 | 1.711   | 18.6794  | -3.4485 | Down | 4.93E-63  | 6.18E-62  |
| Unigene47808  | Potri.008G077400.4 | 1.0789  | 11.7899  | -3.4499 | Down | 8.83E-16  | 3.33E-15  |
| Unigene52634  | Potri.010G056200.1 | 0.4425  | 4.8358   | -3.45   | Down | 8.83E-16  | 3.33E-15  |
| Unigene11903  | Potri.014G196600.1 | 1.3292  | 14.5378  | -3.4512 | Down | 2.40E-69  | 3.34E-68  |
| Unigene43536  | Potri.010G184200.2 | 4.9363  | 54.0185  | -3.452  | Down | 0         | 0         |
| Unigene51130  | Potri.010G094700.5 | 1.1486  | 12.5701  | -3.452  | Down | 1.32E-40  | 1.05E-39  |
| Unigene60542  | Potri.005G176100.2 | 1.9899  | 21.7878  | -3.4528 | Down | 5.26E-90  | 9.85E-89  |
| Unigene97069  | Potri.001G470000.1 | 0.3906  | 4.278    | -3.4532 | Down | 9.62E-14  | 3.32E-13  |
| Unigene96116  | Potri.001G065900.1 | 0.4183  | 4.5819   | -3.4533 | Down | 9.62E-14  | 3.32E-13  |
| Unigene106644 | Potri.005G012400.1 | 0.6032  | 6.6073   | -3.4534 | Down | 9.62E-14  | 3.32E-13  |
| Unigene91437  | Potri.007G136900.1 | 19.9344 | 218.6801 | -3.4555 | Down | 0         | 0         |
| Unigene32475  | Potri.017G009300.1 | 2.1092  | 23.1424  | -3.4558 | Down | 5.91E-80  | 9.69E-79  |
| Unigene11200  | Potri.010G231200.1 | 2.2786  | 25.029   | -3.4574 | Down | 1.37E-96  | 2.81E-95  |

|               |                     |         |          |         |      |           |           |
|---------------|---------------------|---------|----------|---------|------|-----------|-----------|
| Unigene97366  | Potri.009G047700.4  | 0.5902  | 6.4856   | -3.458  | Down | 1.06E-11  | 3.32E-11  |
| Unigene42142  | Potri.008G151100.2  | 3.3024  | 36.2903  | -3.458  | Down | 9.39E-198 | 4.82E-196 |
| Unigene113989 | Potri.007G002100.1  | 0.7091  | 7.7926   | -3.458  | Down | 1.06E-11  | 3.32E-11  |
| Unigene14670  | Potri.004G162800.1  | 2.8365  | 31.1703  | -3.458  | Down | 6.74E-43  | 5.64E-42  |
| Unigene117738 | Potri.001G098700.3  | 0.4908  | 5.3933   | -3.458  | Down | 1.06E-11  | 3.32E-11  |
| Unigene118338 | Potri.017G002500.1  | 0.4337  | 4.7662   | -3.4581 | Down | 1.06E-11  | 3.32E-11  |
| Unigene118216 | Potri.008G113400.1  | 0.4472  | 4.9147   | -3.4581 | Down | 1.06E-11  | 3.32E-11  |
| Unigene112252 | Potri.003G056000.1  | 2.1668  | 23.8443  | -3.46   | Down | 1.62E-30  | 1.00E-29  |
| Unigene74143  | Potri.017G052400.1  | 9.412   | 103.6553 | -3.4611 | Down | 1.71E-113 | 4.29E-112 |
| Unigene100927 | Potri.005G020100.1  | 0.607   | 6.6854   | -3.4612 | Down | 4.04E-20  | 1.80E-19  |
| Unigene86893  | Potri.014G016500.1  | 7.9928  | 88.0682  | -3.4618 | Down | 2.00E-138 | 6.44E-137 |
| Unigene38983  | Potri.001G442600.4  | 3.9104  | 43.1019  | -3.4624 | Down | 1.61E-82  | 2.73E-81  |
| Unigene1341   | Potri.017G034600.1  | 5.3788  | 59.303   | -3.4627 | Down | 1.68E-223 | 9.96E-222 |
| Unigene1956   | Potri.004G049100.1  | 4.7365  | 52.2248  | -3.4628 | Down | 2.07E-134 | 6.44E-133 |
| Unigene103481 | Potri.001G019700.1  | 0.6689  | 7.3758   | -3.4629 | Down | 7.54E-37  | 5.49E-36  |
| Unigene14956  | Potri.011G076500.1  | 1.8809  | 20.7452  | -3.4633 | Down | 4.32E-124 | 1.21E-122 |
| Unigene34498  | Potri.002G012900.1  | 1.7774  | 19.6071  | -3.4635 | Down | 5.08E-149 | 1.81E-147 |
| Unigene76718  | Potri.006G117900.1  | 9.366   | 103.384  | -3.4644 | Down | 4.49E-120 | 1.21E-118 |
| Unigene130    | Potri.001G246200.1  | 7.181   | 79.2739  | -3.4646 | Down | 0         | 0         |
| Unigene19335  | Potri.014G097800.5  | 0.531   | 5.8633   | -3.4649 | Down | 4.32E-18  | 1.79E-17  |
| Unigene97197  | Potri.017G033900.1  | 0.3323  | 3.6695   | -3.465  | Down | 1.19E-09  | 3.33E-09  |
| Unigene116060 | Potri.014G094900.4  | 0.486   | 5.3668   | -3.465  | Down | 1.19E-09  | 3.33E-09  |
| Unigene119062 | Potri.011G090800.1  | 0.5291  | 5.8425   | -3.465  | Down | 4.32E-18  | 1.79E-17  |
| Unigene94477  | Potri.010G130800.3  | 79.7983 | 881.148  | -3.465  | Down | 0         | 0         |
| Unigene35482  | Potri.007G140400.1  | 1.0722  | 11.8401  | -3.465  | Down | 9.41E-110 | 2.26E-108 |
| Unigene112275 | Potri.006G126200.2  | 0.6191  | 6.8365   | -3.465  | Down | 1.19E-09  | 3.33E-09  |
| Unigene110970 | Potri.005G090000.1  | 0.6544  | 7.2263   | -3.465  | Down | 1.19E-09  | 3.33E-09  |
| Unigene106967 | Potri.001G209100.4  | 0.307   | 3.3901   | -3.465  | Down | 1.19E-09  | 3.33E-09  |
| Unigene117604 | Potri.009G053700.20 | 0.8021  | 8.858    | -3.4651 | Down | 4.32E-18  | 1.79E-17  |
| Unigene114724 | Potri.006G003100.3  | 0.5425  | 5.9912   | -3.4651 | Down | 1.19E-09  | 3.33E-09  |
| Unigene14454  | Potri.005G207200.1  | 10.9608 | 121.0844 | -3.4656 | Down | 5.47E-141 | 1.80E-139 |
| Unigene118201 | Potri.008G203900.1  | 1.7077  | 18.8822  | -3.4669 | Down | 3.69E-41  | 2.97E-40  |
| Unigene35226  | Potri.008G125100.1  | 1.5047  | 16.6372  | -3.4669 | Down | 3.69E-41  | 2.97E-40  |
| Unigene21370  | Potri.014G018900.1  | 1.9488  | 21.5623  | -3.4679 | Down | 5.25E-210 | 2.89E-208 |
| Unigene106084 | Potri.014G072900.1  | 0.6217  | 6.8802   | -3.4682 | Down | 1.89E-24  | 9.72E-24  |
| Unigene3665   | Potri.012G037400.1  | 0.9935  | 10.995   | -3.4682 | Down | 1.89E-24  | 9.72E-24  |
| Unigene24763  | Potri.004G180500.1  | 0.89    | 9.8502   | -3.4683 | Down | 1.89E-24  | 9.72E-24  |
| Unigene102120 | Potri.011G109700.1  | 0.6782  | 7.5152   | -3.47   | Down | 4.65E-16  | 1.78E-15  |
| Unigene118820 | Potri.002G141200.1  | 0.5243  | 5.8099   | -3.47   | Down | 4.65E-16  | 1.78E-15  |

|               |                    |         |          |         |      |           |           |
|---------------|--------------------|---------|----------|---------|------|-----------|-----------|
| Unigene12570  | Potri.018G088200.1 | 1.8174  | 20.1392  | -3.4701 | Down | 1.81E-45  | 1.61E-44  |
| Unigene25048  | Potri.010G068100.1 | 2.4176  | 26.7901  | -3.4701 | Down | 8.57E-31  | 5.32E-30  |
| Unigene118624 | Potri.009G126300.1 | 2.2557  | 24.9964  | -3.4701 | Down | 4.06E-60  | 4.83E-59  |
| Unigene90592  | Potri.008G210900.1 | 37.3959 | 414.4164 | -3.4701 | Down | 0         | 0         |
| Unigene16550  | Potri.001G468500.1 | 1.123   | 12.4445  | -3.4701 | Down | 8.57E-31  | 5.32E-30  |
| Unigene107024 | Potri.006G280000.1 | 0.5383  | 5.9656   | -3.4702 | Down | 4.65E-16  | 1.78E-15  |
| Unigene118224 | Potri.001G305000.1 | 0.6261  | 6.9385   | -3.4702 | Down | 4.65E-16  | 1.78E-15  |
| Unigene91269  | Potri.005G255500.1 | 19.1465 | 212.2129 | -3.4704 | Down | 0         | 0         |
| Unigene9211   | Potri.003G210800.1 | 1.8728  | 20.7652  | -3.4709 | Down | 8.67E-52  | 8.79E-51  |
| Unigene22601  | Potri.010G132700.1 | 1.9164  | 21.2508  | -3.471  | Down | 2.26E-87  | 4.10E-86  |
| Unigene107156 | Potri.006G137300.1 | 0.5883  | 6.5285   | -3.4721 | Down | 2.00E-22  | 9.62E-22  |
| Unigene104602 | Potri.014G135500.4 | 0.8605  | 9.5526   | -3.4726 | Down | 8.95E-50  | 8.69E-49  |
| Unigene97990  | Potri.001G285600.1 | 1.1288  | 12.5314  | -3.4727 | Down | 8.95E-50  | 8.69E-49  |
| Unigene16370  | Potri.001G423700.1 | 2.1174  | 23.5145  | -3.4732 | Down | 8.98E-29  | 5.27E-28  |
| Unigene116667 | Potri.010G125800.1 | 1.8251  | 20.2769  | -3.4738 | Down | 4.14E-35  | 2.88E-34  |
| Unigene6448   | Potri.006G005200.1 | 0.9325  | 10.3602  | -3.4738 | Down | 4.14E-35  | 2.88E-34  |
| Unigene4255   | Potri.010G155100.2 | 0.9156  | 10.1761  | -3.4743 | Down | 1.95E-41  | 1.58E-40  |
| Unigene1216   | Potri.012G137800.1 | 1.7089  | 18.9986  | -3.4748 | Down | 2.16E-146 | 7.51E-145 |
| Unigene50007  | Potri.006G228800.1 | 20.0703 | 223.1414 | -3.4748 | Down | 0         | 0         |
| Unigene45590  | Potri.013G149500.1 | 3.6046  | 40.1289  | -3.4767 | Down | 1.14E-146 | 3.98E-145 |
| Unigene104260 | Potri.012G007800.1 | 0.9135  | 10.1693  | -3.4767 | Down | 5.06E-14  | 1.77E-13  |
| Unigene1549   | Potri.010G108100.1 | 1.2774  | 14.2208  | -3.4767 | Down | 1.07E-64  | 1.38E-63  |
| Unigene108335 | Potri.008G183200.2 | 1.0864  | 12.0946  | -3.4767 | Down | 5.06E-14  | 1.77E-13  |
| Unigene35201  | Potri.008G062900.1 | 0.7936  | 8.835    | -3.4767 | Down | 2.13E-20  | 9.59E-20  |
| Unigene117625 | Potri.005G257700.1 | 0.3     | 3.3398   | -3.4767 | Down | 1.37E-07  | 3.38E-07  |
| Unigene15485  | Potri.004G162600.1 | 1.1162  | 12.4263  | -3.4767 | Down | 9.44E-27  | 5.21E-26  |
| Unigene97179  | Potri.001G162000.1 | 0.4782  | 5.3237   | -3.4767 | Down | 1.37E-07  | 3.38E-07  |
| Unigene98437  | Potri.001G151700.2 | 0.3117  | 3.47     | -3.4767 | Down | 1.37E-07  | 3.38E-07  |
| Unigene108939 | Potri.018G019300.2 | 0.5303  | 5.904    | -3.4768 | Down | 1.37E-07  | 3.38E-07  |
| Unigene113173 | Potri.015G126400.1 | 0.4458  | 4.9631   | -3.4768 | Down | 1.37E-07  | 3.38E-07  |
| Unigene119396 | Potri.010G074800.1 | 0.6073  | 6.7611   | -3.4768 | Down | 9.44E-27  | 5.21E-26  |
| Unigene118611 | Potri.006G134600.1 | 0.7266  | 8.0892   | -3.4768 | Down | 2.13E-20  | 9.59E-20  |
| Unigene36753  | Potri.004G131400.2 | 0.4371  | 4.8662   | -3.4768 | Down | 1.37E-07  | 3.38E-07  |
| Unigene15767  | Potri.013G149800.1 | 0.3206  | 3.5695   | -3.4769 | Down | 1.37E-07  | 3.38E-07  |
| Unigene113397 | Potri.001G454100.1 | 0.4405  | 4.9045   | -3.4769 | Down | 1.37E-07  | 3.38E-07  |
| Unigene117004 | Potri.017G101100.2 | 0.3281  | 3.6532   | -3.477  | Down | 1.37E-07  | 3.38E-07  |
| Unigene43876  | Potri.017G004900.1 | 1.4243  | 15.8727  | -3.4782 | Down | 5.34E-69  | 7.39E-68  |
| Unigene33140  | Potri.019G133400.1 | 1.2362  | 13.7778  | -3.4784 | Down | 9.54E-124 | 2.66E-122 |
| Unigene32091  | Potri.008G120000.2 | 1.0564  | 11.7754  | -3.4785 | Down | 2.27E-56  | 2.52E-55  |



|               |                    |         |          |         |      |           |           |
|---------------|--------------------|---------|----------|---------|------|-----------|-----------|
| Unigene48466  | Potri.001G213500.1 | 6.4344  | 71.8135  | -3.4804 | Down | 1.25E-136 | 3.97E-135 |
| Unigene12243  | Potri.019G065000.1 | 0.8137  | 9.089    | -3.4816 | Down | 6.76E-82  | 1.14E-80  |
| Unigene37262  | Potri.010G068100.1 | 4.3978  | 49.1347  | -3.4819 | Down | 1.16E-58  | 1.35E-57  |
| Unigene21421  | Potri.002G185100.1 | 4.8593  | 54.2912  | -3.4819 | Down | 1.15E-229 | 7.02E-228 |
| Unigene119082 | Potri.016G082100.1 | 0.5226  | 5.8413   | -3.4825 | Down | 2.27E-18  | 9.52E-18  |
| Unigene83080  | Potri.012G007600.1 | 3.3654  | 37.617   | -3.4825 | Down | 2.41E-52  | 2.47E-51  |
| Unigene31489  | Potri.015G046200.1 | 0.8828  | 9.868    | -3.4826 | Down | 2.27E-18  | 9.52E-18  |
| Unigene1362   | Potri.014G026800.1 | 3.6108  | 40.3797  | -3.4832 | Down | 4.66E-213 | 2.60E-211 |
| Unigene102789 | Potri.012G072400.2 | 1.072   | 11.9879  | -3.4832 | Down | 5.79E-63  | 7.25E-62  |
| Unigene40737  | Potri.017G071400.1 | 2.2903  | 25.6151  | -3.4834 | Down | 5.04E-46  | 4.53E-45  |
| Unigene16275  | Potri.002G008800.3 | 0.901   | 10.0948  | -3.4859 | Down | 5.58E-12  | 1.77E-11  |
| Unigene25816  | Potri.014G054400.2 | 0.6322  | 7.0835   | -3.486  | Down | 5.58E-12  | 1.77E-11  |
| Unigene52269  | Potri.011G167900.1 | 0.4258  | 4.7708   | -3.486  | Down | 5.58E-12  | 1.77E-11  |
| Unigene27273  | Potri.008G129600.1 | 0.7401  | 8.2922   | -3.486  | Down | 5.58E-12  | 1.77E-11  |
| Unigene16315  | Potri.008G110700.2 | 0.5152  | 5.7725   | -3.486  | Down | 5.58E-12  | 1.77E-11  |
| Unigene30137  | Potri.001G466800.1 | 0.4844  | 5.4276   | -3.486  | Down | 2.28E-33  | 1.52E-32  |
| Unigene95968  | Potri.015G040100.4 | 0.7206  | 8.0743   | -3.4861 | Down | 1.23E-54  | 1.32E-53  |
| Unigene14402  | Potri.013G138500.2 | 0.7342  | 8.2269   | -3.4861 | Down | 1.05E-22  | 5.12E-22  |
| Unigene27457  | Potri.001G411100.2 | 0.9278  | 10.3962  | -3.4861 | Down | 5.58E-12  | 1.77E-11  |
| Unigene95811  | Potri.011G139800.1 | 0.3678  | 4.1216   | -3.4862 | Down | 5.58E-12  | 1.77E-11  |
| Unigene24441  | Potri.001G092200.1 | 4.3328  | 48.5571  | -3.4863 | Down | 1.00E-196 | 5.11E-195 |
| Unigene4955   | Potri.001G083900.1 | 9.4562  | 106.1229 | -3.4883 | Down | 1.23E-154 | 4.59E-153 |
| Unigene15523  | Potri.019G119700.1 | 0.9584  | 10.7562  | -3.4884 | Down | 4.97E-27  | 2.77E-26  |
| Unigene118957 | Potri.007G127000.1 | 0.8413  | 9.442    | -3.4884 | Down | 4.97E-27  | 2.77E-26  |
| Unigene20835  | Potri.002G120400.1 | 2.3974  | 26.9103  | -3.4886 | Down | 4.67E-93  | 9.10E-92  |
| Unigene42329  | Potri.003G220900.1 | 5.5584  | 62.4053  | -3.4889 | Down | 1.88E-82  | 3.18E-81  |
| Unigene73121  | Potri.003G142300.1 | 15.0974 | 169.5433 | -3.4893 | Down | 2.13E-182 | 9.88E-181 |
| Unigene40201  | Potri.010G184200.1 | 3.0826  | 34.6224  | -3.4895 | Down | 9.46E-87  | 1.70E-85  |
| Unigene94548  | Potri.005G140400.1 | 1.1158  | 12.5364  | -3.49   | Down | 2.45E-16  | 9.46E-16  |
| Unigene37549  | Potri.004G121800.1 | 7.6182  | 85.5934  | -3.49   | Down | 1.66E-165 | 6.79E-164 |
| Unigene7243   | Potri.001G472400.1 | 1.2523  | 14.0758  | -3.4906 | Down | 1.92E-80  | 3.18E-79  |
| Unigene25966  | Potri.003G187400.1 | 1.2326  | 13.857   | -3.4908 | Down | 1.31E-50  | 1.30E-49  |
| Unigene21190  | Potri.015G098900.1 | 0.5028  | 5.6537   | -3.4911 | Down | 1.15E-35  | 8.12E-35  |
| Unigene46929  | Potri.002G228300.1 | 4.685   | 52.7067  | -3.4919 | Down | 1.58E-112 | 3.91E-111 |
| Unigene110391 | Potri.014G142700.1 | 1.5054  | 16.9391  | -3.4921 | Down | 1.12E-20  | 5.10E-20  |
| Unigene102613 | Potri.016G020400.1 | 0.5709  | 6.4242   | -3.4922 | Down | 1.12E-20  | 5.10E-20  |
| Unigene31401  | Potri.013G116100.1 | 0.9977  | 11.2452  | -3.4946 | Down | 2.49E-29  | 1.49E-28  |
| Unigene45135  | Potri.012G027900.1 | 1.5128  | 17.0622  | -3.4955 | Down | 4.13E-70  | 5.82E-69  |
| Unigene18165  | Potri.013G078200.2 | 1.9074  | 21.5196  | -3.496  | Down | 1.04E-78  | 1.67E-77  |

|               |                    |         |          |         |      |           |           |
|---------------|--------------------|---------|----------|---------|------|-----------|-----------|
| Unigene51816  | Potri.006G086100.1 | 1.157   | 13.0587  | -3.4966 | Down | 1.40E-46  | 1.27E-45  |
| Unigene8661   | Potri.003G106400.3 | 2.3897  | 26.9767  | -3.4968 | Down | 6.91E-51  | 6.87E-50  |
| Unigene51851  | Potri.001G020300.1 | 2.1887  | 24.7105  | -3.497  | Down | 1.71E-104 | 3.85E-103 |
| Unigene343    | Potri.007G146400.1 | 5.4611  | 61.6814  | -3.4976 | Down | 0         | 0         |
| Unigene89693  | Potri.010G130800.2 | 84.9314 | 959.9923 | -3.4987 | Down | 0         | 0         |
| Unigene101131 | Potri.T023500.1    | 0.2748  | 3.1082   | -3.4996 | Down | 6.25E-10  | 1.78E-09  |
| Unigene101059 | Potri.018G099100.1 | 0.3536  | 3.9995   | -3.4996 | Down | 6.25E-10  | 1.78E-09  |
| Unigene102296 | Potri.017G123600.1 | 0.2713  | 3.0687   | -3.4997 | Down | 1.66E-05  | 3.44E-05  |
| Unigene109687 | Potri.002G013700.1 | 0.3438  | 3.8889   | -3.4997 | Down | 1.66E-05  | 3.44E-05  |
| Unigene95875  | Potri.019G003900.2 | 0.7368  | 8.3347   | -3.4998 | Down | 3.53E-53  | 3.68E-52  |
| Unigene117202 | Potri.017G107400.1 | 0.4263  | 4.8222   | -3.4998 | Down | 6.25E-10  | 1.78E-09  |
| Unigene113515 | Potri.015G050400.1 | 0.2914  | 3.2964   | -3.4998 | Down | 1.66E-05  | 3.44E-05  |
| Unigene5211   | Potri.014G086500.1 | 0.9015  | 10.1981  | -3.4998 | Down | 1.20E-18  | 5.06E-18  |
| Unigene107661 | Potri.014G018800.1 | 0.3693  | 4.1777   | -3.4998 | Down | 1.66E-05  | 3.44E-05  |
| Unigene117430 | Potri.013G127100.2 | 0.4133  | 4.6753   | -3.4998 | Down | 6.25E-10  | 1.78E-09  |
| Unigene64936  | Potri.006G057400.7 | 0.373   | 4.2194   | -3.4998 | Down | 6.25E-10  | 1.78E-09  |
| Unigene53078  | Potri.002G181900.1 | 0.6972  | 7.8868   | -3.4998 | Down | 6.25E-10  | 1.78E-09  |
| Unigene23256  | Potri.016G002900.1 | 1.2837  | 14.522   | -3.4999 | Down | 2.95E-40  | 2.33E-39  |
| Unigene114830 | Potri.015G062200.1 | 0.2693  | 3.0465   | -3.4999 | Down | 1.66E-05  | 3.44E-05  |
| Unigene4897   | Potri.008G204700.3 | 0.5485  | 6.2051   | -3.4999 | Down | 6.25E-10  | 1.78E-09  |
| Unigene39293  | Potri.007G043300.2 | 0.827   | 9.3558   | -3.4999 | Down | 5.54E-23  | 2.72E-22  |
| Unigene105855 | Potri.006G159200.1 | 0.9122  | 10.3193  | -3.4999 | Down | 2.95E-40  | 2.33E-39  |
| Unigene116939 | Potri.005G098800.1 | 0.4414  | 4.9934   | -3.4999 | Down | 6.25E-10  | 1.78E-09  |
| Unigene118988 | Potri.004G158600.1 | 0.9652  | 10.9191  | -3.4999 | Down | 1.25E-31  | 7.97E-31  |
| Unigene104606 | Potri.002G098100.2 | 0.3926  | 4.4415   | -3.4999 | Down | 6.25E-10  | 1.78E-09  |
| Unigene117301 | Potri.002G091200.1 | 0.6304  | 7.1315   | -3.4999 | Down | 2.66E-14  | 9.40E-14  |
| Unigene113202 | Potri.002G081800.5 | 0.2972  | 3.3621   | -3.4999 | Down | 1.66E-05  | 3.44E-05  |
| Unigene114829 | Potri.001G082900.1 | 0.5386  | 6.0931   | -3.4999 | Down | 6.25E-10  | 1.78E-09  |
| Unigene103105 | Potri.001G005500.2 | 0.3569  | 4.0377   | -3.4999 | Down | 1.66E-05  | 3.44E-05  |
| Unigene113261 | Potri.012G054500.1 | 0.296   | 3.3488   | -3.5    | Down | 1.66E-05  | 3.44E-05  |
| Unigene118710 | Potri.011G155400.4 | 0.3134  | 3.5458   | -3.5    | Down | 6.25E-10  | 1.78E-09  |
| Unigene36700  | Potri.011G002800.2 | 0.3121  | 3.5309   | -3.5    | Down | 1.66E-05  | 3.44E-05  |
| Unigene102619 | Potri.008G040900.1 | 0.4144  | 4.6883   | -3.5    | Down | 6.25E-10  | 1.78E-09  |
| Unigene16514  | Potri.002G180800.5 | 0.5505  | 6.228    | -3.5    | Down | 6.25E-10  | 1.78E-09  |
| Unigene114049 | Potri.013G092000.1 | 0.2836  | 3.2087   | -3.5001 | Down | 1.66E-05  | 3.44E-05  |
| Unigene111419 | Potri.012G066300.4 | 0.3215  | 3.6375   | -3.5001 | Down | 1.66E-05  | 3.44E-05  |
| Unigene101797 | Potri.008G080500.2 | 0.2683  | 3.0356   | -3.5001 | Down | 1.66E-05  | 3.44E-05  |
| Unigene75734  | Potri.003G038500.2 | 9.5769  | 108.4276 | -3.501  | Down | 3.07E-124 | 8.61E-123 |
| Unigene34484  | Potri.005G245800.1 | 2.9422  | 33.3343  | -3.502  | Down | 2.23E-68  | 3.06E-67  |

|               |                     |         |          |         |      |           |           |
|---------------|---------------------|---------|----------|---------|------|-----------|-----------|
| Unigene42395  | Potri.013G073900.2  | 3.3055  | 37.4929  | -3.5037 | Down | 0         | 0         |
| Unigene54456  | Potri.009G053800.1  | 7.3342  | 83.1924  | -3.5037 | Down | 1.44E-152 | 5.30E-151 |
| Unigene9665   | Potri.009G165900.1  | 0.6153  | 6.9865   | -3.5052 | Down | 1.31E-29  | 7.88E-29  |
| Unigene48330  | Potri.001G454500.1  | 2.1834  | 24.7972  | -3.5055 | Down | 1.86E-53  | 1.95E-52  |
| Unigene97714  | Potri.003G201800.1  | 0.9772  | 11.0991  | -3.5056 | Down | 2.95E-77  | 4.66E-76  |
| Unigene26671  | Potri.006G237200.2  | 7.8705  | 89.4029  | -3.5058 | Down | 4.94E-101 | 1.07E-99  |
| Unigene105281 | Potri.001G016300.1  | 1.0156  | 11.5383  | -3.506  | Down | 2.76E-25  | 1.46E-24  |
| Unigene96825  | Potri.011G081200.4  | 1.1334  | 12.877   | -3.5061 | Down | 2.76E-25  | 1.46E-24  |
| Unigene91344  | Potri.019G063500.2  | 12.2543 | 139.3473 | -3.5073 | Down | 7.41E-298 | 6.50E-296 |
| Unigene24584  | Potri.T108200.1     | 0.6865  | 7.8069   | -3.5074 | Down | 4.72E-60  | 5.62E-59  |
| Unigene106846 | Potri.019G086400.1  | 0.7862  | 8.9405   | -3.5074 | Down | 5.89E-21  | 2.70E-20  |
| Unigene71257  | Potri.006G116700.1  | 4.9856  | 56.6969  | -3.5074 | Down | 4.72E-60  | 5.62E-59  |
| Unigene12015  | Potri.002G085500.1  | 2.248   | 25.5642  | -3.5074 | Down | 4.72E-60  | 5.62E-59  |
| Unigene106990 | Potri.010G203600.2  | 0.5811  | 6.6128   | -3.5084 | Down | 3.19E-36  | 2.28E-35  |
| Unigene113336 | Potri.009G079500.2  | 1.032   | 11.7538  | -3.5096 | Down | 1.29E-16  | 5.03E-16  |
| Unigene118895 | Potri.015G010000.1  | 0.505   | 5.7518   | -3.5097 | Down | 1.29E-16  | 5.03E-16  |
| Unigene40409  | Potri.006G014300.1  | 1.2678  | 14.4494  | -3.5106 | Down | 2.36E-125 | 6.70E-124 |
| Unigene50826  | Potri.002G033800.1  | 1.1431  | 13.0278  | -3.5106 | Down | 7.90E-43  | 6.61E-42  |
| Unigene68964  | Potri.017G097500.1  | 2.5948  | 29.5856  | -3.5112 | Down | 9.79E-54  | 1.03E-52  |
| Unigene95059  | Potri.016G017400.1  | 0.9286  | 10.5882  | -3.5113 | Down | 1.38E-27  | 7.80E-27  |
| Unigene105824 | Potri.008G159400.2  | 0.4828  | 5.5054   | -3.5113 | Down | 1.38E-27  | 7.80E-27  |
| Unigene601    | Potri.T134700.1     | 5.7612  | 65.7169  | -3.5118 | Down | 0         | 0         |
| Unigene15922  | Potri.013G085700.3  | 1.2941  | 14.7619  | -3.5119 | Down | 1.61E-38  | 1.22E-37  |
| Unigene21630  | Potri.010G098600.1  | 1.497   | 17.0878  | -3.5128 | Down | 2.76E-184 | 1.30E-182 |
| Unigene118651 | Potri.012G022600.2  | 0.3994  | 4.5606   | -3.5133 | Down | 2.93E-12  | 9.41E-12  |
| Unigene3817   | Potri.018G024800.15 | 0.7707  | 8.8009   | -3.5134 | Down | 2.93E-12  | 9.41E-12  |
| Unigene107900 | Potri.014G024700.1  | 0.9142  | 10.4403  | -3.5135 | Down | 2.93E-12  | 9.42E-12  |
| Unigene88286  | Potri.003G087200.1  | 1.1303  | 12.908   | -3.5135 | Down | 2.92E-23  | 1.44E-22  |
| Unigene115919 | Potri.001G170200.1  | 1.231   | 14.0582  | -3.5135 | Down | 2.92E-23  | 1.44E-22  |
| Unigene44032  | Potri.001G146200.14 | 5.9377  | 67.8089  | -3.5135 | Down | 6.57E-241 | 4.30E-239 |
| Unigene33995  | Potri.011G055600.1  | 3.564   | 40.7112  | -3.5139 | Down | 1.55E-160 | 6.04E-159 |
| Unigene45620  | Potri.014G087200.1  | 3.5043  | 40.0572  | -3.5149 | Down | 3.33E-130 | 9.91E-129 |
| Unigene6650   | Potri.010G244100.2  | 1.6619  | 18.9985  | -3.515  | Down | 8.18E-41  | 6.54E-40  |
| Unigene105334 | Potri.009G101700.1  | 0.9816  | 11.2213  | -3.515  | Down | 8.18E-41  | 6.55E-40  |
| Unigene56357  | Potri.005G043900.1  | 2.2455  | 25.6701  | -3.515  | Down | 8.18E-41  | 6.55E-40  |
| Unigene96886  | Potri.004G163600.1  | 0.9047  | 10.3462  | -3.5155 | Down | 6.90E-30  | 4.18E-29  |
| Unigene38261  | Potri.001G313000.1  | 1.3582  | 15.5338  | -3.5156 | Down | 2.56E-58  | 2.95E-57  |
| Unigene41602  | Potri.014G022100.1  | 2.0136  | 23.0368  | -3.5161 | Down | 2.04E-47  | 1.89E-46  |
| Unigene974    | Potri.008G067500.5  | 9.983   | 114.2372 | -3.5164 | Down | 0         | 0         |

|               |                     |         |          |         |      |           |           |
|---------------|---------------------|---------|----------|---------|------|-----------|-----------|
| Unigene14264  | Potri.005G122100.1  | 1.3321  | 15.2489  | -3.5169 | Down | 6.29E-19  | 2.69E-18  |
| Unigene92324  | Potri.004G228300.1  | 16.8604 | 193.0432 | -3.5172 | Down | 0         | 0         |
| Unigene16869  | Potri.014G071200.1  | 1.0685  | 12.2439  | -3.5184 | Down | 1.45E-25  | 7.72E-25  |
| Unigene115044 | Potri.001G249900.2  | 1.4601  | 16.7319  | -3.5185 | Down | 1.45E-25  | 7.72E-25  |
| Unigene72292  | Potri.009G027300.5  | 19.5551 | 224.1398 | -3.5188 | Down | 9.87E-238 | 6.34E-236 |
| Unigene35114  | Potri.001G073600.1  | 1.1286  | 12.9492  | -3.5203 | Down | 2.11E-45  | 1.87E-44  |
| Unigene21246  | Potri.002G229900.1  | 8.1115  | 93.0817  | -3.5205 | Down | 0         | 0         |
| Unigene13070  | Potri.017G117000.1  | 1.6183  | 18.583   | -3.5214 | Down | 1.52E-91  | 2.91E-90  |
| Unigene17178  | Potri.007G131300.12 | 7.57    | 86.9691  | -3.5221 | Down | 7.37E-243 | 4.89E-241 |
| Unigene117908 | Potri.001G465800.1  | 0.2855  | 3.2804   | -3.5223 | Down | 7.20E-08  | 1.80E-07  |
| Unigene106374 | Potri.013G094700.1  | 0.2945  | 3.384    | -3.5224 | Down | 7.20E-08  | 1.80E-07  |
| Unigene26884  | Potri.010G154300.2  | 0.3041  | 3.4944   | -3.5224 | Down | 7.20E-08  | 1.80E-07  |
| Unigene101495 | Potri.010G054500.1  | 0.2627  | 3.0186   | -3.5224 | Down | 7.20E-08  | 1.80E-07  |
| Unigene115486 | Potri.004G105900.1  | 0.3859  | 4.4342   | -3.5224 | Down | 7.20E-08  | 1.80E-07  |
| Unigene116751 | Potri.018G121800.1  | 0.3391  | 3.8967   | -3.5225 | Down | 7.20E-08  | 1.80E-07  |
| Unigene105881 | Potri.018G039000.1  | 0.9626  | 11.0617  | -3.5225 | Down | 7.24E-28  | 4.14E-27  |
| Unigene41958  | Potri.011G152400.2  | 1.5287  | 17.5673  | -3.5225 | Down | 1.75E-34  | 1.19E-33  |
| Unigene102509 | Potri.017G126700.2  | 0.3074  | 3.5328   | -3.5226 | Down | 7.20E-08  | 1.80E-07  |
| Unigene112857 | Potri.006G125400.4  | 0.453   | 5.2062   | -3.5226 | Down | 7.20E-08  | 1.80E-07  |
| Unigene14182  | Potri.001G138000.1  | 0.6647  | 7.6392   | -3.5226 | Down | 3.09E-21  | 1.43E-20  |
| Unigene102142 | Potri.016G020100.1  | 0.3742  | 4.3008   | -3.5227 | Down | 7.20E-08  | 1.80E-07  |
| Unigene117096 | Potri.004G208700.1  | 0.3243  | 3.7273   | -3.5227 | Down | 7.20E-08  | 1.80E-07  |
| Unigene54348  | Potri.001G265400.1  | 9.8994  | 113.8898 | -3.5242 | Down | 9.73E-125 | 2.74E-123 |
| Unigene5948   | Potri.001G160700.5  | 2.6191  | 30.1632  | -3.5256 | Down | 1.81E-65  | 2.37E-64  |
| Unigene118186 | Potri.008G060900.6  | 1.1712  | 13.4921  | -3.5261 | Down | 3.63E-30  | 2.21E-29  |
| Unigene26530  | Potri.003G223600.1  | 0.8232  | 9.4834   | -3.5261 | Down | 7.08E-59  | 8.25E-58  |
| Unigene36439  | Potri.005G181600.1  | 3.3106  | 38.1641  | -3.5271 | Down | 9.26E-68  | 1.26E-66  |
| Unigene17397  | Potri.006G204600.5  | 1.8895  | 21.789   | -3.5275 | Down | 3.62E-61  | 4.40E-60  |
| Unigene99758  | Potri.007G131500.1  | 2.1641  | 24.9615  | -3.5279 | Down | 4.47E-39  | 3.43E-38  |
| Unigene92970  | Potri.017G032900.1  | 44.8023 | 516.8649 | -3.5281 | Down | 0         | 0         |
| Unigene23028  | Potri.009G019300.2  | 1.2503  | 14.424   | -3.5281 | Down | 1.43E-54  | 1.53E-53  |
| Unigene12148  | Potri.013G106200.1  | 0.7429  | 8.5706   | -3.5282 | Down | 1.43E-54  | 1.53E-53  |
| Unigene9260   | Potri.001G103400.2  | 3.4933  | 40.3066  | -3.5284 | Down | 4.75E-70  | 6.68E-69  |
| Unigene2116   | Potri.005G174000.1  | 1.8628  | 21.5022  | -3.5289 | Down | 2.17E-94  | 4.32E-93  |
| Unigene101690 | Potri.009G111100.1  | 0.5579  | 6.4399   | -3.529  | Down | 6.76E-17  | 2.67E-16  |
| Unigene11315  | Potri.005G086500.1  | 3.461   | 39.9715  | -3.5297 | Down | 0         | 0         |
| Unigene34907  | Potri.001G247400.3  | 1.6316  | 18.8475  | -3.53   | Down | 3.23E-81  | 5.38E-80  |
| Unigene36504  | Potri.014G000400.1  | 29.4307 | 340.1057 | -3.5306 | Down | 0         | 0         |
| Unigene91356  | Potri.001G288800.1  | 3.6673  | 42.4017  | -3.5313 | Down | 2.22E-92  | 4.28E-91  |

|               |                    |         |          |         |      |           |           |
|---------------|--------------------|---------|----------|---------|------|-----------|-----------|
| Unigene9613   | Potri.005G112700.1 | 1.6553  | 19.1415  | -3.5315 | Down | 9.19E-35  | 6.32E-34  |
| Unigene49256  | Potri.001G076600.2 | 1.3353  | 15.4411  | -3.5315 | Down | 4.87E-68  | 6.64E-67  |
| Unigene39728  | Potri.008G049600.1 | 8.9878  | 103.9559 | -3.5319 | Down | 0         | 0         |
| Unigene102955 | Potri.002G212900.1 | 0.5058  | 5.8575   | -3.5336 | Down | 3.28E-10  | 9.47E-10  |
| Unigene118353 | Potri.001G358500.2 | 0.3462  | 4.0092   | -3.5336 | Down | 3.28E-10  | 9.47E-10  |
| Unigene3508   | Potri.009G115100.1 | 1.5986  | 18.5139  | -3.5337 | Down | 3.81E-28  | 2.19E-27  |
| Unigene97286  | Potri.006G118800.3 | 0.6573  | 7.6122   | -3.5337 | Down | 3.28E-10  | 9.47E-10  |
| Unigene28088  | Potri.003G167400.1 | 1.1477  | 13.292   | -3.5337 | Down | 3.81E-28  | 2.19E-27  |
| Unigene103630 | Potri.010G170200.1 | 0.5092  | 5.8975   | -3.5338 | Down | 3.30E-19  | 1.43E-18  |
| Unigene102196 | Potri.008G020200.1 | 0.4782  | 5.5383   | -3.5338 | Down | 3.28E-10  | 9.47E-10  |
| Unigene97002  | Potri.007G024600.1 | 0.7071  | 8.1894   | -3.5338 | Down | 3.28E-10  | 9.47E-10  |
| Unigene106135 | Potri.006G097700.1 | 0.4648  | 5.3831   | -3.5338 | Down | 3.28E-10  | 9.47E-10  |
| Unigene57370  | Potri.002G116300.1 | 0.5588  | 6.4718   | -3.5338 | Down | 3.28E-10  | 9.47E-10  |
| Unigene103591 | Potri.006G167700.2 | 0.4375  | 5.0673   | -3.5339 | Down | 3.28E-10  | 9.47E-10  |
| Unigene98648  | Potri.005G252100.1 | 0.4662  | 5.3999   | -3.5339 | Down | 3.28E-10  | 9.47E-10  |
| Unigene103269 | Potri.001G407300.1 | 0.504   | 5.8377   | -3.5339 | Down | 3.28E-10  | 9.47E-10  |
| Unigene46180  | Potri.010G244100.2 | 1.2994  | 15.0695  | -3.5357 | Down | 2.35E-39  | 1.81E-38  |
| Unigene5627   | Potri.005G231300.1 | 8.2618  | 95.8162  | -3.5357 | Down | 9.87E-153 | 3.63E-151 |
| Unigene20540  | Potri.001G073600.1 | 2.2017  | 25.5343  | -3.5357 | Down | 2.35E-39  | 1.81E-38  |
| Unigene5109   | Potri.001G449100.1 | 2.366   | 27.4399  | -3.5358 | Down | 2.35E-39  | 1.81E-38  |
| Unigene12631  | Potri.001G313300.1 | 1.2811  | 14.8608  | -3.5361 | Down | 3.10E-97  | 6.39E-96  |
| Unigene33796  | Potri.013G071000.2 | 2.0883  | 24.2288  | -3.5363 | Down | 3.75E-146 | 1.30E-144 |
| Unigene5140   | Potri.014G136100.1 | 0.7111  | 8.2529   | -3.5368 | Down | 1.51E-50  | 1.49E-49  |
| Unigene116745 | Potri.005G054200.1 | 1.0173  | 11.812   | -3.5374 | Down | 1.62E-21  | 7.60E-21  |
| Unigene70697  | Potri.005G229800.1 | 1.6785  | 19.4898  | -3.5375 | Down | 1.62E-21  | 7.60E-21  |
| Unigene34819  | Potri.013G150300.2 | 1.9235  | 22.3451  | -3.5382 | Down | 7.72E-53  | 7.98E-52  |
| Unigene4012   | Potri.006G062300.7 | 1.3068  | 15.1941  | -3.5394 | Down | 3.94E-55  | 4.27E-54  |
| Unigene51057  | Potri.014G007500.1 | 0.6322  | 7.3559   | -3.5404 | Down | 1.54E-12  | 5.01E-12  |
| Unigene119129 | Potri.010G012000.1 | 0.3172  | 3.6905   | -3.5404 | Down | 1.54E-12  | 5.01E-12  |
| Unigene103899 | Potri.008G183200.1 | 0.6709  | 7.8058   | -3.5404 | Down | 1.54E-12  | 5.01E-12  |
| Unigene105816 | Potri.006G244400.6 | 1.2818  | 14.9141  | -3.5404 | Down | 8.04E-24  | 4.06E-23  |
| Unigene108467 | Potri.006G010600.1 | 0.901   | 10.4831  | -3.5404 | Down | 1.54E-12  | 5.01E-12  |
| Unigene23412  | Potri.008G118000.1 | 2.5251  | 29.3811  | -3.5405 | Down | 9.13E-80  | 1.49E-78  |
| Unigene104614 | Potri.005G007000.1 | 0.376   | 4.375    | -3.5405 | Down | 1.54E-12  | 5.01E-12  |
| Unigene81211  | Potri.003G086000.1 | 28.0115 | 326.0879 | -3.5412 | Down | 0         | 0         |
| Unigene49586  | Potri.010G220600.3 | 3.0683  | 35.7431  | -3.5422 | Down | 3.54E-73  | 5.24E-72  |
| Unigene52513  | Potri.010G189800.2 | 5.9009  | 68.7544  | -3.5424 | Down | 9.99E-183 | 4.65E-181 |
| Unigene6235   | Potri.010G068100.1 | 0.5329  | 6.2104   | -3.5427 | Down | 4.00E-26  | 2.17E-25  |
| Unigene19140  | Potri.014G146100.1 | 1.6346  | 19.052   | -3.5429 | Down | 4.00E-26  | 2.17E-25  |

|               |                    |         |          |         |      |           |           |
|---------------|--------------------|---------|----------|---------|------|-----------|-----------|
| Unigene44049  | Potri.002G006100.1 | 1.0001  | 11.6626  | -3.5437 | Down | 1.23E-39  | 9.59E-39  |
| Unigene24513  | Potri.014G138900.2 | 7.2527  | 84.6122  | -3.5443 | Down | 0         | 0         |
| Unigene48581  | Potri.004G084000.1 | 0.7523  | 8.78     | -3.5448 | Down | 2.00E-28  | 1.16E-27  |
| Unigene96482  | Potri.006G081500.1 | 0.5666  | 6.6128   | -3.5449 | Down | 7.33E-15  | 2.66E-14  |
| Unigene118613 | Potri.015G121800.1 | 0.4844  | 5.6538   | -3.545  | Down | 7.33E-15  | 2.66E-14  |
| Unigene42941  | Potri.001G454500.1 | 8.886   | 103.7635 | -3.5456 | Down | 0         | 0         |
| Unigene14438  | Potri.004G211700.1 | 2.745   | 32.067   | -3.5462 | Down | 4.29E-116 | 1.11E-114 |
| Unigene4988   | Potri.003G196200.3 | 6.5692  | 76.7717  | -3.5468 | Down | 4.14E-134 | 1.28E-132 |
| Unigene104757 | Potri.019G053100.2 | 0.2627  | 3.0725   | -3.5479 | Down | 3.55E-17  | 1.42E-16  |
| Unigene46522  | Potri.011G010600.1 | 0.8575  | 10.0298  | -3.548  | Down | 5.03E-33  | 3.32E-32  |
| Unigene105959 | Potri.006G186900.2 | 0.5002  | 5.8507   | -3.548  | Down | 3.55E-17  | 1.42E-16  |
| Unigene12703  | Potri.010G231200.1 | 3.0311  | 35.4682  | -3.5486 | Down | 1.30E-82  | 2.20E-81  |
| Unigene110565 | Potri.012G048400.1 | 4.829   | 56.5104  | -3.5487 | Down | 7.25E-67  | 9.72E-66  |
| Unigene45852  | Potri.009G077900.5 | 4.1039  | 48.0454  | -3.5493 | Down | 6.28E-103 | 1.39E-101 |
| Unigene40278  | Potri.003G187400.1 | 0.9248  | 10.8268  | -3.5493 | Down | 2.54E-35  | 1.77E-34  |
| Unigene52129  | Potri.002G006100.1 | 1.5371  | 17.995   | -3.5493 | Down | 2.54E-35  | 1.77E-34  |
| Unigene42719  | Potri.010G068100.1 | 2.9396  | 34.4222  | -3.5496 | Down | 5.81E-139 | 1.88E-137 |
| Unigene106377 | Potri.008G190000.2 | 0.5247  | 6.1445   | -3.5497 | Down | 2.13E-53  | 2.23E-52  |
| Unigene82980  | Potri.003G204300.3 | 18.7202 | 219.2747 | -3.5501 | Down | 5.49E-301 | 4.89E-299 |
| Unigene118099 | Potri.017G032200.1 | 0.7332  | 8.59     | -3.5504 | Down | 1.73E-19  | 7.57E-19  |
| Unigene9213   | Potri.018G013500.1 | 0.9     | 10.558   | -3.5523 | Down | 3.28E-42  | 2.71E-41  |
| Unigene11444  | Potri.011G154200.1 | 2.4301  | 28.5078  | -3.5523 | Down | 8.16E-144 | 2.75E-142 |
| Unigene13290  | Potri.006G051100.1 | 15.2995 | 179.5701 | -3.553  | Down | 0         | 0         |
| Unigene16400  | Potri.001G366200.1 | 3.2098  | 37.6811  | -3.5533 | Down | 3.81E-67  | 5.13E-66  |
| Unigene116721 | Potri.017G155300.6 | 1.1337  | 13.3136  | -3.5538 | Down | 4.22E-24  | 2.15E-23  |
| Unigene40531  | Potri.010G102900.1 | 0.6376  | 7.4875   | -3.5538 | Down | 4.22E-24  | 2.15E-23  |
| Unigene13545  | Potri.007G115500.1 | 1.0486  | 12.3299  | -3.5556 | Down | 6.96E-81  | 1.15E-79  |
| Unigene38695  | Potri.013G042000.2 | 2.4033  | 28.2746  | -3.5564 | Down | 2.92E-58  | 3.36E-57  |
| Unigene1575   | Potri.008G116800.6 | 0.5346  | 6.2914   | -3.5568 | Down | 5.26E-31  | 3.28E-30  |
| Unigene117203 | Potri.003G113600.1 | 1.3854  | 16.3037  | -3.5568 | Down | 5.26E-31  | 3.28E-30  |
| Unigene108294 | Potri.016G021700.1 | 9.5965  | 112.9477 | -3.557  | Down | 8.71E-122 | 2.39E-120 |
| Unigene42562  | Potri.014G042600.2 | 7.325   | 86.2269  | -3.5572 | Down | 0         | 0         |
| Unigene90578  | Potri.006G012300.1 | 23.1315 | 272.4702 | -3.5582 | Down | 0         | 0         |
| Unigene42408  | Potri.001G189500.1 | 11.8661 | 139.7934 | -3.5584 | Down | 0         | 0         |
| Unigene17872  | Potri.008G146400.1 | 1.6176  | 19.0675  | -3.5592 | Down | 3.40E-40  | 2.68E-39  |
| Unigene31709  | Potri.004G211700.1 | 1.3321  | 15.7026  | -3.5592 | Down | 3.40E-40  | 2.68E-39  |
| Unigene33688  | Potri.018G055400.1 | 3.4168  | 40.2875  | -3.5596 | Down | 1.88E-83  | 3.23E-82  |
| Unigene110380 | Potri.006G068500.9 | 4.1816  | 49.3755  | -3.5617 | Down | 1.53E-58  | 1.77E-57  |
| Unigene54268  | Potri.006G088400.1 | 4.8248  | 56.979   | -3.5619 | Down | 7.83E-61  | 9.44E-60  |

|               |                    |         |          |         |      |           |           |
|---------------|--------------------|---------|----------|---------|------|-----------|-----------|
| Unigene34637  | Potri.017G093700.1 | 2.9217  | 34.5101  | -3.5621 | Down | 0         | 0         |
| Unigene45715  | Potri.011G109700.1 | 2.3491  | 27.7469  | -3.5621 | Down | 2.29E-188 | 1.11E-186 |
| Unigene85751  | Potri.001G064600.1 | 3.5645  | 42.1053  | -3.5622 | Down | 2.05E-65  | 2.68E-64  |
| Unigene93113  | Potri.005G181600.1 | 14.3621 | 169.7543 | -3.5631 | Down | 0         | 0         |
| Unigene93673  | Potri.005G249700.1 | 11.045  | 130.6995 | -3.5648 | Down | 0         | 0         |
| Unigene114587 | Potri.004G186300.1 | 0.2743  | 3.2503   | -3.5667 | Down | 8.68E-06  | 1.84E-05  |
| Unigene115246 | Potri.004G017600.1 | 0.2618  | 3.102    | -3.5667 | Down | 8.68E-06  | 1.84E-05  |
| Unigene118855 | Potri.001G345300.1 | 0.2949  | 3.4944   | -3.5667 | Down | 1.71E-10  | 5.03E-10  |
| Unigene107001 | Potri.019G119500.3 | 0.2875  | 3.4068   | -3.5668 | Down | 1.71E-10  | 5.03E-10  |
| Unigene114078 | Potri.019G090200.1 | 0.2826  | 3.3488   | -3.5668 | Down | 8.68E-06  | 1.84E-05  |
| Unigene101996 | Potri.019G072000.1 | 0.2555  | 3.0277   | -3.5668 | Down | 8.68E-06  | 1.84E-05  |
| Unigene113738 | Potri.015G039000.4 | 0.5761  | 6.8268   | -3.5668 | Down | 1.71E-10  | 5.03E-10  |
| Unigene102346 | Potri.014G133900.1 | 0.5516  | 6.5366   | -3.5668 | Down | 9.08E-20  | 4.01E-19  |
| Unigene103118 | Potri.014G083400.2 | 0.2655  | 3.1462   | -3.5668 | Down | 8.68E-06  | 1.84E-05  |
| Unigene102079 | Potri.009G120900.1 | 0.4803  | 5.6915   | -3.5668 | Down | 3.76E-08  | 9.61E-08  |
| Unigene107700 | Potri.004G234100.1 | 0.554   | 6.5649   | -3.5668 | Down | 3.76E-08  | 9.61E-08  |
| Unigene101147 | Potri.003G139900.1 | 0.3168  | 3.754    | -3.5668 | Down | 1.71E-10  | 5.03E-10  |
| Unigene6051   | Potri.003G078700.1 | 0.3718  | 4.4057   | -3.5668 | Down | 3.76E-08  | 9.61E-08  |
| Unigene4398   | Potri.002G024800.2 | 0.7551  | 8.9481   | -3.5668 | Down | 8.04E-13  | 2.65E-12  |
| Unigene488    | Potri.019G054300.3 | 4.4909  | 53.2219  | -3.5669 | Down | 0         | 0         |
| Unigene98285  | Potri.017G064600.1 | 0.6053  | 7.173    | -3.5669 | Down | 9.08E-20  | 4.01E-19  |
| Unigene98321  | Potri.016G088500.1 | 0.391   | 4.6335   | -3.5669 | Down | 8.04E-13  | 2.65E-12  |
| Unigene115107 | Potri.016G049300.1 | 0.3954  | 4.6859   | -3.5669 | Down | 3.76E-08  | 9.61E-08  |
| Unigene102649 | Potri.015G138800.2 | 0.3301  | 3.9118   | -3.5669 | Down | 3.76E-08  | 9.61E-08  |
| Unigene114245 | Potri.015G062900.4 | 0.5609  | 6.6472   | -3.5669 | Down | 1.71E-10  | 5.03E-10  |
| Unigene102506 | Potri.014G086500.1 | 0.7173  | 8.5007   | -3.5669 | Down | 1.71E-10  | 5.03E-10  |
| Unigene114716 | Potri.013G068400.6 | 0.4069  | 4.8222   | -3.5669 | Down | 3.76E-08  | 9.61E-08  |
| Unigene100898 | Potri.013G034400.1 | 0.3508  | 4.1571   | -3.5669 | Down | 3.76E-08  | 9.61E-08  |
| Unigene113474 | Potri.013G032600.1 | 0.7314  | 8.6674   | -3.5669 | Down | 8.04E-13  | 2.65E-12  |
| Unigene112659 | Potri.012G116800.1 | 0.3045  | 3.6085   | -3.5669 | Down | 8.68E-06  | 1.84E-05  |
| Unigene109998 | Potri.011G140200.1 | 0.6813  | 8.0737   | -3.5669 | Down | 1.71E-10  | 5.03E-10  |
| Unigene2829   | Potri.010G109200.2 | 0.5667  | 6.716    | -3.5669 | Down | 1.10E-26  | 6.07E-26  |
| Unigene9559   | Potri.010G002400.1 | 0.6501  | 7.7044   | -3.5669 | Down | 9.08E-20  | 4.01E-19  |
| Unigene114391 | Potri.009G101800.2 | 0.6933  | 8.2163   | -3.5669 | Down | 8.04E-13  | 2.65E-12  |
| Unigene108390 | Potri.008G169300.1 | 0.3604  | 4.2709   | -3.5669 | Down | 8.68E-06  | 1.84E-05  |
| Unigene107612 | Potri.008G115300.1 | 0.9233  | 10.9415  | -3.5669 | Down | 8.04E-13  | 2.66E-12  |
| Unigene49184  | Potri.007G032500.1 | 2.679   | 31.7485  | -3.5669 | Down | 4.11E-61  | 4.98E-60  |
| Unigene71808  | Potri.007G005600.1 | 0.3657  | 4.3337   | -3.5669 | Down | 8.68E-06  | 1.84E-05  |
| Unigene115153 | Potri.006G247700.1 | 0.2636  | 3.1239   | -3.5669 | Down | 8.68E-06  | 1.84E-05  |

|               |                    |        |         |         |      |           |           |
|---------------|--------------------|--------|---------|---------|------|-----------|-----------|
| Unigene108425 | Potri.006G075300.2 | 0.3604 | 4.2709  | -3.5669 | Down | 8.68E-06  | 1.84E-05  |
| Unigene115135 | Potri.005G065200.2 | 0.659  | 7.8098  | -3.5669 | Down | 8.04E-13  | 2.65E-12  |
| Unigene94751  | Potri.005G003200.1 | 0.3954 | 4.6859  | -3.5669 | Down | 3.76E-08  | 9.61E-08  |
| Unigene111817 | Potri.004G099100.1 | 0.3161 | 3.7461  | -3.5669 | Down | 8.68E-06  | 1.84E-05  |
| Unigene109355 | Potri.004G049700.1 | 0.6972 | 8.2624  | -3.5669 | Down | 1.71E-10  | 5.03E-10  |
| Unigene110221 | Potri.004G048700.2 | 0.8439 | 10.0008 | -3.5669 | Down | 8.04E-13  | 2.65E-12  |
| Unigene110079 | Potri.004G021000.1 | 0.3391 | 4.0185  | -3.5669 | Down | 8.68E-06  | 1.84E-05  |
| Unigene51733  | Potri.003G115300.2 | 1.3839 | 16.4007 | -3.5669 | Down | 1.19E-49  | 1.15E-48  |
| Unigene112513 | Potri.003G114100.1 | 0.307  | 3.6382  | -3.5669 | Down | 8.68E-06  | 1.84E-05  |
| Unigene60835  | Potri.003G106400.2 | 0.9172 | 10.8698 | -3.5669 | Down | 3.84E-15  | 1.41E-14  |
| Unigene103904 | Potri.002G137400.5 | 0.317  | 3.7567  | -3.5669 | Down | 3.76E-08  | 9.61E-08  |
| Unigene105679 | Potri.001G321000.1 | 0.4892 | 5.7972  | -3.5669 | Down | 1.71E-10  | 5.03E-10  |
| Unigene117932 | Potri.T153300.1    | 0.284  | 3.3658  | -3.567  | Down | 3.76E-08  | 9.61E-08  |
| Unigene112809 | Potri.015G064100.1 | 0.302  | 3.5792  | -3.567  | Down | 8.68E-06  | 1.84E-05  |
| Unigene33340  | Potri.009G137300.1 | 1.794  | 21.2613 | -3.567  | Down | 4.96E-100 | 1.06E-98  |
| Unigene54552  | Potri.005G050500.1 | 0.7612 | 9.0212  | -3.567  | Down | 1.86E-17  | 7.51E-17  |
| Unigene117741 | Potri.004G037200.1 | 1.0797 | 12.7958 | -3.567  | Down | 1.10E-26  | 6.07E-26  |
| Unigene45958  | Potri.003G188600.1 | 0.6729 | 7.9749  | -3.567  | Down | 1.86E-17  | 7.51E-17  |
| Unigene115758 | Potri.003G139100.1 | 1.3768 | 16.3168 | -3.567  | Down | 1.10E-26  | 6.07E-26  |
| Unigene7311   | Potri.002G191000.2 | 1.3625 | 16.1475 | -3.567  | Down | 9.08E-20  | 4.01E-19  |
| Unigene98957  | Potri.001G406800.1 | 1.0409 | 12.3359 | -3.567  | Down | 3.84E-15  | 1.41E-14  |
| Unigene5118   | Potri.001G303100.1 | 0.5063 | 6.0005  | -3.567  | Down | 3.84E-15  | 1.41E-14  |
| Unigene110000 | Potri.016G100200.1 | 0.3406 | 4.0369  | -3.5671 | Down | 8.68E-06  | 1.84E-05  |
| Unigene99343  | Potri.008G017600.2 | 0.4076 | 4.831   | -3.5671 | Down | 1.71E-10  | 5.03E-10  |
| Unigene105163 | Potri.006G117000.2 | 0.2799 | 3.3174  | -3.5671 | Down | 1.71E-10  | 5.03E-10  |
| Unigene113675 | Potri.006G020800.1 | 0.2891 | 3.4266  | -3.5671 | Down | 8.68E-06  | 1.84E-05  |
| Unigene108890 | Potri.005G213400.3 | 0.3552 | 4.2099  | -3.5671 | Down | 8.68E-06  | 1.84E-05  |
| Unigene15474  | Potri.004G196100.1 | 0.3174 | 3.762   | -3.5671 | Down | 8.68E-06  | 1.84E-05  |
| Unigene102225 | Potri.004G047000.1 | 0.3796 | 4.4991  | -3.5671 | Down | 1.71E-10  | 5.03E-10  |
| Unigene117801 | Potri.004G031200.1 | 0.3885 | 4.6046  | -3.5671 | Down | 1.71E-10  | 5.03E-10  |
| Unigene116884 | Potri.002G124800.1 | 0.444  | 5.2623  | -3.5671 | Down | 1.71E-10  | 5.03E-10  |
| Unigene119259 | Potri.001G448000.1 | 0.518  | 6.1394  | -3.5671 | Down | 4.47E-22  | 2.13E-21  |
| Unigene101152 | Potri.001G073400.1 | 0.2584 | 3.0626  | -3.5671 | Down | 3.76E-08  | 9.61E-08  |
| Unigene108554 | Potri.017G071900.1 | 0.3586 | 4.2504  | -3.5672 | Down | 8.68E-06  | 1.84E-05  |
| Unigene97456  | Potri.001G307600.3 | 0.2925 | 3.467   | -3.5672 | Down | 8.68E-06  | 1.84E-05  |
| Unigene1064   | Potri.001G014400.1 | 1.0001 | 11.8701 | -3.5691 | Down | 1.77E-141 | 5.85E-140 |
| Unigene10243  | Potri.010G145900.2 | 1.4176 | 16.8313 | -3.5696 | Down | 9.48E-112 | 2.34E-110 |
| Unigene50191  | Potri.006G240000.1 | 2.6702 | 31.7047 | -3.5697 | Down | 9.25E-222 | 5.44E-220 |
| Unigene60559  | Potri.019G109700.1 | 5.4619 | 64.8797 | -3.5703 | Down | 5.04E-270 | 3.85E-268 |



|               |                     |         |          |         |      |           |           |
|---------------|---------------------|---------|----------|---------|------|-----------|-----------|
| Unigene88833  | Potri.002G230000.3  | 7.7435  | 92.003   | -3.5706 | Down | 1.27E-164 | 5.18E-163 |
| Unigene14428  | Potri.001G004100.1  | 6.5762  | 78.1564  | -3.571  | Down | 1.28E-148 | 4.54E-147 |
| Unigene12072  | Potri.016G011600.2  | 4.7437  | 56.3923  | -3.5714 | Down | 0         | 0         |
| Unigene20490  | Potri.004G035700.1  | 14.9068 | 177.3619 | -3.5727 | Down | 0         | 0         |
| Unigene105588 | Potri.006G274700.2  | 0.8206  | 9.765    | -3.5729 | Down | 3.17E-52  | 3.24E-51  |
| Unigene40382  | Potri.006G129800.1  | 2.6084  | 31.0522  | -3.5735 | Down | 1.22E-47  | 1.14E-46  |
| Unigene10080  | Potri.003G146800.1  | 0.9638  | 11.4741  | -3.5735 | Down | 1.22E-47  | 1.14E-46  |
| Unigene51332  | Potri.006G254600.1  | 0.9188  | 10.9426  | -3.5741 | Down | 7.33E-87  | 1.32E-85  |
| Unigene12751  | Potri.014G060500.1  | 4.8832  | 58.207   | -3.5753 | Down | 2.61E-218 | 1.51E-216 |
| Unigene69343  | Potri.010G051400.3  | 1.492   | 17.7887  | -3.5756 | Down | 3.66E-36  | 2.62E-35  |
| Unigene20267  | Potri.011G071300.2  | 0.7136  | 8.5086   | -3.5757 | Down | 3.66E-36  | 2.62E-35  |
| Unigene42971  | Potri.019G055800.1  | 1.9547  | 23.3375  | -3.5776 | Down | 7.07E-115 | 1.80E-113 |
| Unigene16546  | Potri.004G095700.2  | 0.7362  | 8.7905   | -3.5778 | Down | 2.88E-29  | 1.71E-28  |
| Unigene31375  | Potri.001G025100.19 | 0.8109  | 9.6823   | -3.5778 | Down | 2.88E-29  | 1.71E-28  |
| Unigene26266  | Potri.013G147700.1  | 1.1272  | 13.4687  | -3.5788 | Down | 5.77E-27  | 3.21E-26  |
| Unigene49371  | Potri.005G083900.1  | 1.2533  | 14.981   | -3.5793 | Down | 3.26E-50  | 3.20E-49  |
| Unigene34958  | Potri.012G044900.10 | 9.5276  | 113.9309 | -3.5799 | Down | 0         | 0         |
| Unigene106205 | Potri.T074900.1     | 0.6882  | 8.2298   | -3.58   | Down | 1.16E-24  | 6.00E-24  |
| Unigene103359 | Potri.001G251600.1  | 0.3108  | 3.7171   | -3.5801 | Down | 1.16E-24  | 6.00E-24  |
| Unigene1520   | Potri.008G039000.1  | 1.4151  | 16.9263  | -3.5803 | Down | 5.34E-92  | 1.03E-90  |
| Unigene98356  | Potri.008G112900.2  | 0.4144  | 4.9611   | -3.5816 | Down | 2.34E-22  | 1.12E-21  |
| Unigene21867  | Potri.003G210800.1  | 1.3447  | 16.1035  | -3.582  | Down | 9.92E-162 | 3.93E-160 |
| Unigene34480  | Potri.011G151200.2  | 2.4135  | 28.9176  | -3.5827 | Down | 2.89E-78  | 4.62E-77  |
| Unigene84978  | Potri.014G000400.1  | 19.0438 | 228.235  | -3.5831 | Down | 0         | 0         |
| Unigene37565  | Potri.010G062300.1  | 0.598   | 7.1673   | -3.5832 | Down | 4.75E-20  | 2.12E-19  |
| Unigene108902 | Potri.006G060000.1  | 1.4209  | 17.0309  | -3.5833 | Down | 4.75E-20  | 2.12E-19  |
| Unigene2631   | Potri.002G176400.1  | 3.0055  | 36.0338  | -3.5837 | Down | 2.80E-92  | 5.40E-91  |
| Unigene23413  | Potri.014G105900.1  | 1.3219  | 15.8512  | -3.5839 | Down | 4.45E-55  | 4.81E-54  |
| Unigene82514  | Potri.007G146400.1  | 10.3926 | 124.6968 | -3.5848 | Down | 1.96E-171 | 8.36E-170 |
| Unigene46154  | Potri.003G201800.3  | 0.6661  | 7.996    | -3.5855 | Down | 9.73E-18  | 3.98E-17  |
| Unigene105488 | Potri.006G243400.1  | 0.535   | 6.423    | -3.5856 | Down | 9.73E-18  | 3.98E-17  |
| Unigene119224 | Potri.011G135000.1  | 0.4131  | 4.9596   | -3.5857 | Down | 9.73E-18  | 3.98E-17  |
| Unigene45307  | Potri.003G057000.1  | 6.1301  | 73.639   | -3.5865 | Down | 0         | 0         |
| Unigene89401  | Potri.012G070900.3  | 30.8903 | 371.6283 | -3.5886 | Down | 0         | 0         |
| Unigene56526  | Potri.004G211700.1  | 1.119   | 13.462   | -3.5886 | Down | 2.01E-15  | 7.46E-15  |
| Unigene38812  | Potri.003G194000.1  | 1.0708  | 12.8823  | -3.5886 | Down | 1.51E-29  | 9.05E-29  |
| Unigene110182 | Potri.002G120400.1  | 1.0127  | 12.1828  | -3.5886 | Down | 2.01E-15  | 7.46E-15  |
| Unigene119299 | Potri.017G116100.1  | 0.3345  | 4.0245   | -3.5887 | Down | 2.01E-15  | 7.46E-15  |
| Unigene117497 | Potri.014G192800.2  | 0.6131  | 7.3765   | -3.5887 | Down | 2.01E-15  | 7.46E-15  |

|               |                     |         |          |         |      |           |           |
|---------------|---------------------|---------|----------|---------|------|-----------|-----------|
| Unigene66767  | Potri.005G078700.11 | 21.3051 | 256.391  | -3.5891 | Down | 0         | 0         |
| Unigene25638  | Potri.017G150900.1  | 0.4365  | 5.2583   | -3.5905 | Down | 3.02E-27  | 1.69E-26  |
| Unigene20740  | Potri.001G083900.1  | 9.0698  | 109.3184 | -3.5913 | Down | 7.77E-189 | 3.78E-187 |
| Unigene23326  | Potri.010G127600.1  | 2.3407  | 28.2273  | -3.5921 | Down | 3.01E-74  | 4.52E-73  |
| Unigene96637  | Potri.013G059100.2  | 1.7678  | 21.3305  | -3.5929 | Down | 6.07E-25  | 3.17E-24  |
| Unigene51944  | Potri.008G130200.2  | 0.4819  | 5.8149   | -3.5929 | Down | 4.20E-13  | 1.41E-12  |
| Unigene46436  | Potri.007G029200.1  | 4.2386  | 51.1448  | -3.5929 | Down | 3.19E-60  | 3.80E-59  |
| Unigene47320  | Potri.006G109100.1  | 1.6217  | 19.5684  | -3.5929 | Down | 6.07E-25  | 3.17E-24  |
| Unigene44738  | Potri.004G233100.2  | 5.7026  | 68.8109  | -3.5929 | Down | 0         | 0         |
| Unigene117663 | Potri.017G033300.2  | 0.4973  | 6.001    | -3.593  | Down | 4.20E-13  | 1.41E-12  |
| Unigene116007 | Potri.015G000500.1  | 1.2229  | 14.7565  | -3.593  | Down | 6.07E-25  | 3.17E-24  |
| Unigene119373 | Potri.008G074400.1  | 0.5166  | 6.2337   | -3.593  | Down | 6.07E-25  | 3.17E-24  |
| Unigene62181  | Potri.007G140300.1  | 0.8674  | 10.4668  | -3.593  | Down | 4.20E-13  | 1.41E-12  |
| Unigene12358  | Potri.010G191900.4  | 29.116  | 351.4581 | -3.5935 | Down | 0         | 0         |
| Unigene8397   | Potri.014G026500.1  | 1.2383  | 14.9583  | -3.5945 | Down | 4.16E-79  | 6.75E-78  |
| Unigene43197  | Potri.017G041500.1  | 1.9784  | 23.9168  | -3.5956 | Down | 2.09E-161 | 8.24E-160 |
| Unigene103981 | Potri.005G192800.1  | 0.4104  | 4.9617   | -3.5957 | Down | 1.23E-22  | 5.94E-22  |
| Unigene15521  | Potri.008G039600.6  | 0.746   | 9.0193   | -3.5958 | Down | 1.23E-22  | 5.94E-22  |
| Unigene40290  | Potri.005G090300.3  | 1.8912  | 22.8659  | -3.5958 | Down | 6.82E-44  | 5.84E-43  |
| Unigene23580  | Potri.004G050700.1  | 2.4194  | 29.2519  | -3.5958 | Down | 7.86E-171 | 3.34E-169 |
| Unigene3432   | Potri.001G288800.1  | 1.1576  | 13.9955  | -3.5958 | Down | 1.23E-22  | 5.94E-22  |
| Unigene99822  | Potri.006G005100.1  | 0.501   | 6.0578   | -3.5959 | Down | 1.23E-22  | 5.94E-22  |
| Unigene29548  | Potri.001G188700.1  | 3.1772  | 38.4503  | -3.5972 | Down | 2.13E-173 | 9.21E-172 |
| Unigene15228  | Potri.003G056000.1  | 1.7215  | 20.8433  | -3.5978 | Down | 4.70E-51  | 4.68E-50  |
| Unigene20138  | Potri.004G231700.1  | 5.1424  | 62.2723  | -3.5981 | Down | 3.00E-178 | 1.35E-176 |
| Unigene64986  | Potri.015G103500.2  | 7.05    | 85.4046  | -3.5986 | Down | 3.12E-204 | 1.66E-202 |
| Unigene90030  | Potri.014G016500.1  | 11.4613 | 138.861  | -3.5988 | Down | 3.55E-270 | 2.72E-268 |
| Unigene104786 | Potri.005G107400.1  | 0.3064  | 3.7132   | -3.5992 | Down | 8.96E-11  | 2.67E-10  |
| Unigene42140  | Potri.012G019700.1  | 0.623   | 7.5505   | -3.5993 | Down | 2.49E-20  | 1.12E-19  |
| Unigene106841 | Potri.008G143100.1  | 0.3578  | 4.3365   | -3.5993 | Down | 8.96E-11  | 2.67E-10  |
| Unigene106751 | Potri.T176300.1     | 0.3777  | 4.5781   | -3.5994 | Down | 8.96E-11  | 2.67E-10  |
| Unigene119036 | Potri.011G151500.1  | 0.2693  | 3.2641   | -3.5994 | Down | 8.96E-11  | 2.67E-10  |
| Unigene116951 | Potri.010G159100.2  | 0.4401  | 5.3343   | -3.5994 | Down | 8.96E-11  | 2.67E-10  |
| Unigene116114 | Potri.002G216800.1  | 0.4844  | 5.8712   | -3.5994 | Down | 8.96E-11  | 2.67E-10  |
| Unigene115818 | Potri.001G321000.1  | 0.4973  | 6.0278   | -3.5994 | Down | 8.96E-11  | 2.67E-10  |
| Unigene100307 | Potri.002G026200.1  | 0.2664  | 3.2292   | -3.5995 | Down | 8.96E-11  | 2.67E-10  |
| Unigene90286  | Potri.017G076800.1  | 25.7545 | 312.4453 | -3.6007 | Down | 0         | 0         |
| Unigene103364 | Potri.004G026200.1  | 0.2898  | 3.519    | -3.602  | Down | 1.58E-27  | 8.94E-27  |
| Unigene56559  | Potri.012G091500.2  | 3.8167  | 46.3532  | -3.6023 | Down | 1.25E-53  | 1.32E-52  |

|               |                    |         |          |         |      |           |           |
|---------------|--------------------|---------|----------|---------|------|-----------|-----------|
| Unigene9648   | Potri.010G145900.2 | 0.6461  | 7.8472   | -3.6023 | Down | 1.58E-27  | 8.94E-27  |
| Unigene45966  | Potri.001G301400.1 | 1.0309  | 12.52    | -3.6023 | Down | 1.58E-27  | 8.94E-27  |
| Unigene118661 | Potri.001G272100.1 | 0.5567  | 6.7689   | -3.6039 | Down | 5.09E-18  | 2.10E-17  |
| Unigene65600  | Potri.016G032000.1 | 0.6527  | 7.9366   | -3.604  | Down | 5.09E-18  | 2.10E-17  |
| Unigene43233  | Potri.003G112600.8 | 11.3376 | 137.9029 | -3.6045 | Down | 0         | 0         |
| Unigene7015   | Potri.014G149900.1 | 3.0345  | 36.9159  | -3.6047 | Down | 2.15E-115 | 5.51E-114 |
| Unigene22937  | Potri.008G079500.1 | 0.754   | 9.1743   | -3.605  | Down | 3.08E-82  | 5.19E-81  |
| Unigene51871  | Potri.001G163600.1 | 0.728   | 8.8583   | -3.605  | Down | 7.05E-42  | 5.78E-41  |
| Unigene118304 | Potri.001G034700.1 | 0.8756  | 10.6595  | -3.6057 | Down | 3.18E-25  | 1.67E-24  |
| Unigene21766  | Potri.006G013900.2 | 11.8359 | 144.179  | -3.6066 | Down | 0         | 0         |
| Unigene5253   | Potri.009G036900.1 | 1.654   | 20.154   | -3.607  | Down | 1.65E-70  | 2.33E-69  |
| Unigene82462  | Potri.002G230000.3 | 19.7216 | 240.3414 | -3.6072 | Down | 0         | 0         |
| Unigene113231 | Potri.007G135400.1 | 2.3682  | 28.8632  | -3.6074 | Down | 1.39E-39  | 1.08E-38  |
| Unigene43364  | Potri.013G073500.1 | 2.1014  | 25.6312  | -3.6085 | Down | 2.40E-201 | 1.26E-199 |
| Unigene20275  | Potri.004G233500.1 | 6.7756  | 82.6832  | -3.6092 | Down | 7.07E-242 | 4.66E-240 |
| Unigene90364  | Potri.005G178300.3 | 29.6433 | 361.7726 | -3.6093 | Down | 0         | 0         |
| Unigene97884  | Potri.019G039300.3 | 0.2784  | 3.3987   | -3.6098 | Down | 1.96E-08  | 5.11E-08  |
| Unigene106404 | Potri.019G031300.1 | 0.6525  | 7.9667   | -3.6099 | Down | 1.05E-15  | 3.94E-15  |
| Unigene96007  | Potri.014G037200.1 | 0.3301  | 4.0304   | -3.6099 | Down | 1.96E-08  | 5.11E-08  |
| Unigene108567 | Potri.010G095500.1 | 0.538   | 6.5687   | -3.6099 | Down | 1.96E-08  | 5.11E-08  |
| Unigene24589  | Potri.T066500.1    | 0.3179  | 3.8815   | -3.61   | Down | 1.96E-08  | 5.11E-08  |
| Unigene68405  | Potri.008G162500.1 | 3.5736  | 43.6342  | -3.61   | Down | 5.89E-116 | 1.52E-114 |
| Unigene105011 | Potri.006G040800.1 | 0.4099  | 5.0048   | -3.61   | Down | 1.05E-15  | 3.94E-15  |
| Unigene13191  | Potri.005G181700.1 | 1.0657  | 13.0124  | -3.61   | Down | 4.14E-30  | 2.52E-29  |
| Unigene47401  | Potri.005G036400.1 | 0.4908  | 5.9925   | -3.61   | Down | 1.96E-08  | 5.11E-08  |
| Unigene108732 | Potri.002G046300.3 | 0.5354  | 6.5373   | -3.61   | Down | 1.96E-08  | 5.11E-08  |
| Unigene66796  | Potri.001G455500.1 | 0.9364  | 11.4334  | -3.61   | Down | 1.05E-15  | 3.94E-15  |
| Unigene116518 | Potri.017G032100.1 | 0.3475  | 4.2432   | -3.6101 | Down | 1.96E-08  | 5.11E-08  |
| Unigene8695   | Potri.015G023800.1 | 0.6957  | 8.4951   | -3.6101 | Down | 1.87E-44  | 1.62E-43  |
| Unigene101581 | Potri.014G128000.1 | 0.4633  | 5.6575   | -3.6101 | Down | 1.05E-15  | 3.94E-15  |
| Unigene37224  | Potri.008G070700.5 | 0.5485  | 6.6975   | -3.6101 | Down | 1.96E-08  | 5.11E-08  |
| Unigene19927  | Potri.002G040100.2 | 1.0111  | 12.3461  | -3.6101 | Down | 6.41E-23  | 3.14E-22  |
| Unigene114477 | Potri.010G203200.6 | 0.4144  | 5.0604   | -3.6102 | Down | 1.96E-08  | 5.11E-08  |
| Unigene717    | Potri.007G128700.2 | 1.227   | 14.9901  | -3.6108 | Down | 8.22E-121 | 2.24E-119 |
| Unigene92889  | Potri.009G149700.1 | 6.531   | 79.9013  | -3.6128 | Down | 1.84E-216 | 1.05E-214 |
| Unigene35084  | Potri.019G119700.1 | 0.9233  | 11.2996  | -3.6133 | Down | 2.40E-61  | 2.91E-60  |
| Unigene463    | Potri.006G228200.1 | 9.9835  | 122.2416 | -3.614  | Down | 0         | 0         |
| Unigene95897  | Potri.001G079200.1 | 0.5416  | 6.6368   | -3.6152 | Down | 1.30E-20  | 5.91E-20  |
| Unigene108338 | Potri.016G001600.1 | 4.3456  | 53.2552  | -3.6153 | Down | 4.69E-59  | 5.48E-58  |

|               |                    |         |          |         |      |           |           |
|---------------|--------------------|---------|----------|---------|------|-----------|-----------|
| Unigene46507  | Potri.009G010700.1 | 1.3751  | 16.8519  | -3.6153 | Down | 1.30E-20  | 5.91E-20  |
| Unigene61098  | Potri.008G193000.1 | 1.303   | 15.9688  | -3.6153 | Down | 1.30E-20  | 5.91E-20  |
| Unigene36338  | Potri.012G043200.1 | 6.094   | 74.7105  | -3.6158 | Down | 1.64E-140 | 5.40E-139 |
| Unigene55907  | Potri.006G088600.1 | 3.3618  | 41.22    | -3.616  | Down | 6.74E-52  | 6.84E-51  |
| Unigene50020  | Potri.001G007300.1 | 0.8638  | 10.603   | -3.6176 | Down | 8.80E-69  | 1.21E-67  |
| Unigene106056 | Potri.015G024200.1 | 0.2905  | 3.5678   | -3.6184 | Down | 2.19E-13  | 7.45E-13  |
| Unigene8733   | Potri.006G160000.1 | 0.9233  | 11.3394  | -3.6184 | Down | 2.19E-13  | 7.45E-13  |
| Unigene19818  | Potri.016G001100.1 | 0.7581  | 9.3112   | -3.6185 | Down | 1.66E-25  | 8.82E-25  |
| Unigene27014  | Potri.010G184200.1 | 2.0271  | 24.8974  | -3.6185 | Down | 1.25E-61  | 1.53E-60  |
| Unigene104069 | Potri.006G170700.2 | 0.8335  | 10.2371  | -3.6185 | Down | 1.32E-49  | 1.28E-48  |
| Unigene106880 | Potri.012G134800.1 | 0.3552  | 4.363    | -3.6186 | Down | 2.19E-13  | 7.45E-13  |
| Unigene20460  | Potri.019G131100.8 | 44.5483 | 547.7319 | -3.62   | Down | 0         | 0         |
| Unigene99659  | Potri.009G016900.4 | 0.5992  | 7.37     | -3.6206 | Down | 2.16E-30  | 1.33E-29  |
| Unigene119277 | Potri.006G241300.3 | 0.6823  | 8.3923   | -3.6206 | Down | 2.16E-30  | 1.33E-29  |
| Unigene26599  | Potri.005G177700.1 | 2.7531  | 33.8704  | -3.6209 | Down | 3.25E-76  | 5.05E-75  |
| Unigene20068  | Potri.001G087400.1 | 2.1653  | 26.6396  | -3.6209 | Down | 3.25E-76  | 5.05E-75  |
| Unigene89400  | Potri.018G130800.1 | 9.2461  | 113.7638 | -3.6211 | Down | 2.69E-213 | 1.50E-211 |
| Unigene103753 | Potri.T076300.2    | 0.7213  | 8.8807   | -3.622  | Down | 2.66E-18  | 1.11E-17  |
| Unigene9318   | Potri.T040900.1    | 0.946   | 11.6479  | -3.6221 | Down | 2.66E-18  | 1.11E-17  |
| Unigene16812  | Potri.005G049800.1 | 2.8329  | 34.9289  | -3.6241 | Down | 5.12E-45  | 4.49E-44  |
| Unigene7307   | Potri.006G051100.1 | 6.9009  | 85.17    | -3.6255 | Down | 1.90E-192 | 9.42E-191 |
| Unigene30051  | Potri.004G082900.2 | 0.4278  | 5.2798   | -3.6255 | Down | 4.32E-28  | 2.48E-27  |
| Unigene41597  | Potri.013G034000.1 | 1.1798  | 14.5684  | -3.6262 | Down | 5.67E-33  | 3.74E-32  |
| Unigene67741  | Potri.015G059600.1 | 3.6774  | 45.4206  | -3.6266 | Down | 2.41E-69  | 3.35E-68  |
| Unigene49710  | Potri.017G041500.1 | 2.341   | 28.9199  | -3.6269 | Down | 3.32E-74  | 4.97E-73  |
| Unigene83036  | Potri.018G130800.1 | 17.1073 | 211.35   | -3.627  | Down | 1.34E-296 | 1.17E-294 |
| Unigene94373  | Potri.002G079900.1 | 64.6552 | 799.1732 | -3.6277 | Down | 0         | 0         |
| Unigene43653  | Potri.004G046600.1 | 3.8564  | 47.6774  | -3.628  | Down | 2.45E-149 | 8.74E-148 |
| Unigene45041  | Potri.007G032500.7 | 3.6898  | 45.6297  | -3.6284 | Down | 4.54E-113 | 1.13E-111 |
| Unigene114659 | Potri.019G058600.1 | 0.2723  | 3.3732   | -3.6308 | Down | 4.51E-06  | 9.83E-06  |
| Unigene102723 | Potri.016G107200.1 | 0.2826  | 3.501    | -3.6309 | Down | 4.51E-06  | 9.83E-06  |
| Unigene104057 | Potri.012G076700.1 | 0.4363  | 5.405    | -3.6309 | Down | 4.67E-11  | 1.41E-10  |
| Unigene115166 | Potri.010G043300.1 | 0.2627  | 3.2544   | -3.6309 | Down | 4.51E-06  | 9.83E-06  |
| Unigene113429 | Potri.015G109500.2 | 0.5874  | 7.2776   | -3.631  | Down | 4.67E-11  | 1.41E-10  |
| Unigene106406 | Potri.011G096600.1 | 1.1235  | 13.9196  | -3.631  | Down | 8.68E-26  | 4.65E-25  |
| Unigene95133  | Potri.009G101100.1 | 0.3391  | 4.2012   | -3.631  | Down | 4.67E-11  | 1.41E-10  |
| Unigene114765 | Potri.007G105100.1 | 0.2703  | 3.3488   | -3.631  | Down | 4.51E-06  | 9.83E-06  |
| Unigene111021 | Potri.006G278000.1 | 0.3272  | 4.0538   | -3.631  | Down | 4.51E-06  | 9.83E-06  |
| Unigene116599 | Potri.006G212300.1 | 0.4591  | 5.6878   | -3.631  | Down | 4.67E-11  | 1.41E-10  |

|               |                    |         |          |         |      |           |           |
|---------------|--------------------|---------|----------|---------|------|-----------|-----------|
| Unigene103470 | Potri.001G330300.6 | 0.347   | 4.2989   | -3.631  | Down | 4.51E-06  | 9.83E-06  |
| Unigene108781 | Potri.001G095000.1 | 0.7105  | 8.8025   | -3.631  | Down | 4.67E-11  | 1.41E-10  |
| Unigene111549 | Potri.T161600.1    | 0.3188  | 3.9498   | -3.6311 | Down | 4.51E-06  | 9.83E-06  |
| Unigene110617 | Potri.018G095400.1 | 0.6631  | 8.2156   | -3.6311 | Down | 4.67E-11  | 1.41E-10  |
| Unigene16023  | Potri.018G005900.2 | 0.6907  | 8.558    | -3.6311 | Down | 5.48E-16  | 2.08E-15  |
| Unigene14768  | Potri.017G125000.1 | 0.8815  | 10.9218  | -3.6311 | Down | 1.99E-40  | 1.58E-39  |
| Unigene113144 | Potri.017G085000.1 | 0.2972  | 3.6823   | -3.6311 | Down | 4.51E-06  | 9.83E-06  |
| Unigene107418 | Potri.016G109700.3 | 0.373   | 4.6213   | -3.6311 | Down | 4.51E-06  | 9.83E-06  |
| Unigene117346 | Potri.013G149500.1 | 1.0448  | 12.9448  | -3.6311 | Down | 8.68E-26  | 4.65E-25  |
| Unigene103661 | Potri.012G057400.2 | 0.2495  | 3.0912   | -3.6311 | Down | 4.51E-06  | 9.83E-06  |
| Unigene116113 | Potri.005G044000.1 | 1.211   | 15.0042  | -3.6311 | Down | 8.68E-26  | 4.65E-25  |
| Unigene113142 | Potri.003G112600.6 | 0.2972  | 3.6823   | -3.6311 | Down | 4.51E-06  | 9.83E-06  |
| Unigene114385 | Potri.017G148300.1 | 0.2773  | 3.4359   | -3.6312 | Down | 4.51E-06  | 9.83E-06  |
| Unigene113774 | Potri.013G020800.1 | 0.288   | 3.5686   | -3.6312 | Down | 4.51E-06  | 9.83E-06  |
| Unigene115172 | Potri.011G140900.1 | 0.5253  | 6.5089   | -3.6312 | Down | 4.67E-11  | 1.41E-10  |
| Unigene57954  | Potri.008G147100.3 | 0.336   | 4.1633   | -3.6312 | Down | 4.51E-06  | 9.83E-06  |
| Unigene95338  | Potri.012G038100.1 | 0.3095  | 3.8351   | -3.6313 | Down | 4.51E-06  | 9.83E-06  |
| Unigene115626 | Potri.010G001200.1 | 0.2537  | 3.1437   | -3.6313 | Down | 4.51E-06  | 9.83E-06  |
| Unigene111172 | Potri.008G200900.1 | 0.3243  | 4.0185   | -3.6313 | Down | 4.51E-06  | 9.83E-06  |
| Unigene118890 | Potri.007G046900.1 | 0.2891  | 3.5824   | -3.6313 | Down | 4.67E-11  | 1.41E-10  |
| Unigene103397 | Potri.003G123500.1 | 0.2572  | 3.1871   | -3.6313 | Down | 4.51E-06  | 9.83E-06  |
| Unigene115883 | Potri.001G463100.1 | 0.2478  | 3.0706   | -3.6313 | Down | 4.51E-06  | 9.83E-06  |
| Unigene32283  | Potri.017G095000.2 | 4.9189  | 60.9769  | -3.6319 | Down | 0         | 0         |
| Unigene21506  | Potri.009G108600.1 | 5.6704  | 70.3357  | -3.6327 | Down | 0         | 0         |
| Unigene48365  | Potri.015G070000.2 | 9.5671  | 118.729  | -3.6334 | Down | 7.43E-194 | 3.72E-192 |
| Unigene48419  | Potri.015G002800.1 | 31.3721 | 389.3915 | -3.6337 | Down | 0         | 0         |
| Unigene8905   | Potri.014G024700.1 | 1.8504  | 22.978   | -3.6343 | Down | 7.11E-48  | 6.65E-47  |
| Unigene52591  | Potri.005G004600.1 | 0.9028  | 11.2109  | -3.6344 | Down | 7.11E-48  | 6.65E-47  |
| Unigene31132  | Potri.001G041000.1 | 0.6312  | 7.8516   | -3.6368 | Down | 2.26E-28  | 1.31E-27  |
| Unigene4887   | Potri.013G075200.1 | 6.9185  | 86.0957  | -3.6374 | Down | 3.71E-170 | 1.57E-168 |
| Unigene84594  | Potri.001G276900.1 | 3.8632  | 48.0787  | -3.6375 | Down | 1.77E-72  | 2.58E-71  |
| Unigene5742   | Potri.006G061200.1 | 0.5157  | 6.4198   | -3.6379 | Down | 1.75E-23  | 8.72E-23  |
| Unigene20355  | Potri.003G006100.1 | 12.6564 | 157.5664 | -3.638  | Down | 0         | 0         |
| Unigene15257  | Potri.017G007200.1 | 1.2075  | 15.0333  | -3.6381 | Down | 1.75E-23  | 8.72E-23  |
| Unigene24299  | Potri.014G026500.2 | 2.1911  | 27.2842  | -3.6383 | Down | 9.04E-107 | 2.09E-105 |
| Unigene52573  | Potri.003G142300.1 | 24.1943 | 301.421  | -3.639  | Down | 0         | 0         |
| Unigene49979  | Potri.009G011800.1 | 2.8467  | 35.4668  | -3.6391 | Down | 4.68E-97  | 9.63E-96  |
| Unigene58910  | Potri.009G005400.1 | 1.1604  | 14.4667  | -3.64   | Down | 1.39E-18  | 5.86E-18  |
| Unigene73741  | Potri.006G150900.1 | 1.2316  | 15.3538  | -3.64   | Down | 1.39E-18  | 5.86E-18  |

|               |                    |         |          |         |      |           |           |
|---------------|--------------------|---------|----------|---------|------|-----------|-----------|
| Unigene51690  | Potri.013G115800.1 | 1.1698  | 14.5908  | -3.6407 | Down | 2.51E-65  | 3.27E-64  |
| Unigene54195  | Potri.018G148800.7 | 6.3999  | 79.8317  | -3.6408 | Down | 1.90E-158 | 7.32E-157 |
| Unigene63153  | Potri.005G013400.1 | 1.9815  | 24.739   | -3.6421 | Down | 2.75E-43  | 2.33E-42  |
| Unigene7688   | Potri.010G076800.1 | 3.5211  | 43.9787  | -3.6427 | Down | 1.87E-146 | 6.50E-145 |
| Unigene117747 | Potri.013G060500.2 | 0.4908  | 6.1335   | -3.6435 | Down | 1.14E-13  | 3.93E-13  |
| Unigene117586 | Potri.001G186600.1 | 0.5027  | 6.2823   | -3.6435 | Down | 1.14E-13  | 3.93E-13  |
| Unigene11900  | Potri.003G139100.1 | 4.4308  | 55.374   | -3.6436 | Down | 1.01E-271 | 7.82E-270 |
| Unigene119335 | Potri.018G069700.2 | 0.2687  | 3.3584   | -3.6437 | Down | 1.14E-13  | 3.93E-13  |
| Unigene101437 | Potri.006G019200.1 | 0.5977  | 7.4703   | -3.6437 | Down | 1.14E-13  | 3.93E-13  |
| Unigene37687  | Potri.009G027300.4 | 4.1444  | 51.863   | -3.6455 | Down | 1.31E-65  | 1.72E-64  |
| Unigene119189 | Potri.015G133200.1 | 0.4884  | 6.1166   | -3.6466 | Down | 3.54E-21  | 1.64E-20  |
| Unigene118378 | Potri.017G134800.1 | 1.3719  | 17.1826  | -3.6467 | Down | 5.43E-41  | 4.37E-40  |
| Unigene114819 | Potri.011G040700.1 | 2.1545  | 26.9836  | -3.6467 | Down | 5.43E-41  | 4.37E-40  |
| Unigene19724  | Potri.003G167100.1 | 10.0032 | 125.486  | -3.649  | Down | 0         | 0         |
| Unigene48394  | Potri.001G017300.3 | 5.482   | 68.7977  | -3.6496 | Down | 0         | 0         |
| Unigene46948  | Potri.013G147700.1 | 2.8257  | 35.4665  | -3.6498 | Down | 5.16E-51  | 5.14E-50  |
| Unigene18127  | Potri.015G059700.1 | 4.0662  | 51.0529  | -3.6502 | Down | 3.60E-130 | 1.07E-128 |
| Unigene94740  | Potri.018G020600.1 | 0.3859  | 4.8499   | -3.6517 | Down | 1.02E-08  | 2.70E-08  |
| Unigene112717 | Potri.008G110100.1 | 0.4549  | 5.7174   | -3.6517 | Down | 1.02E-08  | 2.71E-08  |
| Unigene106870 | Potri.003G163800.4 | 0.2465  | 3.098    | -3.6517 | Down | 1.02E-08  | 2.71E-08  |
| Unigene80529  | Potri.008G121000.2 | 1.3482  | 16.9456  | -3.6518 | Down | 9.13E-24  | 4.59E-23  |
| Unigene35154  | Potri.007G137100.1 | 0.7378  | 9.2735   | -3.6518 | Down | 1.83E-68  | 2.51E-67  |
| Unigene104306 | Potri.004G034200.1 | 0.2526  | 3.1749   | -3.6518 | Down | 1.02E-08  | 2.71E-08  |
| Unigene26494  | Potri.015G108300.4 | 0.3598  | 4.5225   | -3.6519 | Down | 1.02E-08  | 2.70E-08  |
| Unigene117196 | Potri.015G066500.1 | 0.3197  | 4.0185   | -3.6519 | Down | 1.02E-08  | 2.70E-08  |
| Unigene113190 | Potri.010G180700.2 | 0.4458  | 5.6035   | -3.6519 | Down | 1.02E-08  | 2.71E-08  |
| Unigene115164 | Potri.003G146500.3 | 0.394   | 4.9524   | -3.6519 | Down | 1.02E-08  | 2.70E-08  |
| Unigene99477  | Potri.001G213600.2 | 0.3975  | 4.9964   | -3.6519 | Down | 2.86E-16  | 1.10E-15  |
| Unigene117303 | Potri.001G085100.1 | 0.9456  | 11.8858  | -3.6519 | Down | 9.13E-24  | 4.59E-23  |
| Unigene97437  | Potri.014G138400.1 | 0.4741  | 5.9597   | -3.652  | Down | 1.02E-08  | 2.70E-08  |
| Unigene117171 | Potri.006G224700.1 | 0.3215  | 4.0416   | -3.652  | Down | 1.02E-08  | 2.70E-08  |
| Unigene13137  | Potri.006G171400.8 | 2.1029  | 26.4722  | -3.654  | Down | 1.01E-48  | 9.63E-48  |
| Unigene111281 | Potri.010G120700.2 | 2.0991  | 26.4422  | -3.655  | Down | 8.08E-34  | 5.43E-33  |
| Unigene85982  | Potri.017G032700.1 | 20.54   | 258.7601 | -3.6551 | Down | 0         | 0         |
| Unigene104749 | Potri.005G190800.1 | 0.6006  | 7.5711   | -3.656  | Down | 2.36E-26  | 1.29E-25  |
| Unigene1019   | Potri.010G120100.1 | 2.4042  | 30.3084  | -3.6561 | Down | 2.10E-267 | 1.59E-265 |
| Unigene90382  | Potri.006G263500.1 | 17.426  | 219.8057 | -3.6569 | Down | 0         | 0         |
| Unigene46529  | Potri.019G063500.2 | 15.3331 | 193.4279 | -3.6571 | Down | 0         | 0         |
| Unigene25615  | Potri.004G055700.1 | 0.8554  | 10.795   | -3.6576 | Down | 2.57E-71  | 3.68E-70  |

|               |                    |         |          |         |      |           |           |
|---------------|--------------------|---------|----------|---------|------|-----------|-----------|
| Unigene113219 | Potri.007G001000.1 | 1.0361  | 13.0761  | -3.6577 | Down | 7.23E-19  | 3.09E-18  |
| Unigene102682 | Potri.006G110100.2 | 0.6544  | 8.2586   | -3.6577 | Down | 7.23E-19  | 3.09E-18  |
| Unigene118324 | Potri.005G118400.1 | 0.61    | 7.699    | -3.6578 | Down | 7.23E-19  | 3.09E-18  |
| Unigene106938 | Potri.007G011100.2 | 0.4054  | 5.1224   | -3.6594 | Down | 6.15E-29  | 3.63E-28  |
| Unigene96339  | Potri.010G130900.1 | 0.6995  | 8.849    | -3.6611 | Down | 4.95E-79  | 8.01E-78  |
| Unigene103412 | Potri.006G118800.3 | 0.3316  | 4.1971   | -3.6619 | Down | 2.43E-11  | 7.47E-11  |
| Unigene117943 | Potri.014G194900.5 | 0.3787  | 4.7937   | -3.662  | Down | 2.43E-11  | 7.47E-11  |
| Unigene94635  | Potri.014G003100.2 | 0.7423  | 9.3965   | -3.662  | Down | 1.61E-31  | 1.02E-30  |
| Unigene72519  | Potri.T001700.1    | 1.4415  | 18.2484  | -3.6621 | Down | 1.85E-21  | 8.63E-21  |
| Unigene99968  | Potri.018G087100.2 | 0.3639  | 4.6066   | -3.6621 | Down | 2.43E-11  | 7.47E-11  |
| Unigene113562 | Potri.018G023200.1 | 0.5828  | 7.3778   | -3.6621 | Down | 2.43E-11  | 7.47E-11  |
| Unigene55371  | Potri.014G026800.1 | 2.1014  | 26.6015  | -3.6621 | Down | 1.48E-41  | 1.20E-40  |
| Unigene101617 | Potri.010G237600.1 | 0.5874  | 7.4358   | -3.6621 | Down | 2.43E-11  | 7.47E-11  |
| Unigene17166  | Potri.009G097300.2 | 2.4807  | 31.4036  | -3.6621 | Down | 1.34E-71  | 1.93E-70  |
| Unigene117915 | Potri.008G202700.1 | 0.3806  | 4.8181   | -3.6621 | Down | 2.43E-11  | 7.47E-11  |
| Unigene117414 | Potri.007G140200.1 | 0.8266  | 10.4637  | -3.6621 | Down | 1.85E-21  | 8.63E-21  |
| Unigene16539  | Potri.003G028700.1 | 3.3799  | 42.7862  | -3.6621 | Down | 1.34E-71  | 1.93E-70  |
| Unigene74263  | Potri.002G201500.4 | 11.1031 | 140.5548 | -3.6621 | Down | 1.51E-161 | 5.96E-160 |
| Unigene96869  | Potri.004G043500.1 | 0.4662  | 5.9022   | -3.6622 | Down | 2.43E-11  | 7.47E-11  |
| Unigene117857 | Potri.001G138100.2 | 0.3845  | 4.8678   | -3.6622 | Down | 2.43E-11  | 7.47E-11  |
| Unigene8008   | Potri.011G151200.1 | 1.5245  | 19.3261  | -3.6641 | Down | 9.63E-77  | 1.51E-75  |
| Unigene2587   | Potri.004G228300.3 | 0.9747  | 12.3585  | -3.6644 | Down | 9.75E-67  | 1.30E-65  |
| Unigene42559  | Potri.016G125200.1 | 8.1328  | 103.1578 | -3.665  | Down | 0         | 0         |
| Unigene49117  | Potri.001G455000.1 | 2.3034  | 29.2183  | -3.665  | Down | 2.58E-79  | 4.21E-78  |
| Unigene35064  | Potri.013G066100.1 | 2.0062  | 25.456   | -3.6655 | Down | 2.61E-69  | 3.63E-68  |
| Unigene11492  | Potri.009G149700.1 | 2.8513  | 36.1918  | -3.666  | Down | 2.33E-277 | 1.84E-275 |
| Unigene66514  | Potri.005G009700.1 | 2.5677  | 32.6141  | -3.6669 | Down | 2.76E-49  | 2.65E-48  |
| Unigene118424 | Potri.006G278000.1 | 0.4239  | 5.3885   | -3.6681 | Down | 5.96E-14  | 2.07E-13  |
| Unigene115307 | Potri.013G144800.1 | 0.6498  | 8.2611   | -3.6683 | Down | 5.96E-14  | 2.07E-13  |
| Unigene50248  | Potri.009G098500.1 | 1.572   | 20.0156  | -3.6705 | Down | 3.21E-29  | 1.91E-28  |
| Unigene25096  | Potri.T024100.1    | 3.0781  | 39.2098  | -3.6711 | Down | 2.61E-87  | 4.73E-86  |
| Unigene38825  | Potri.007G104300.2 | 1.3183  | 16.7926  | -3.6711 | Down | 2.04E-44  | 1.77E-43  |
| Unigene63035  | Potri.T082900.1    | 7.302   | 93.0213  | -3.6712 | Down | 4.55E-188 | 2.19E-186 |
| Unigene119088 | Potri.008G130000.1 | 0.3913  | 4.988    | -3.6721 | Down | 1.49E-16  | 5.80E-16  |
| Unigene119491 | Potri.006G134600.1 | 0.5007  | 6.3829   | -3.6722 | Down | 8.39E-32  | 5.35E-31  |
| Unigene119048 | Potri.012G066700.1 | 0.4018  | 5.1224   | -3.6723 | Down | 1.49E-16  | 5.80E-16  |
| Unigene40533  | Potri.006G033500.1 | 1.136   | 14.483   | -3.6723 | Down | 8.39E-32  | 5.35E-31  |
| Unigene118251 | Potri.001G312800.2 | 2.1263  | 27.1083  | -3.6723 | Down | 3.71E-62  | 4.58E-61  |
| Unigene9659   | Potri.001G122600.1 | 1.2012  | 15.3249  | -3.6733 | Down | 1.44E-49  | 1.39E-48  |

|               |                    |         |          |         |      |           |           |
|---------------|--------------------|---------|----------|---------|------|-----------|-----------|
| Unigene44882  | Potri.001G073600.1 | 2.0428  | 26.0837  | -3.6745 | Down | 7.10E-70  | 9.96E-69  |
| Unigene14121  | Potri.003G067600.1 | 0.7481  | 9.5569   | -3.6752 | Down | 3.77E-19  | 1.63E-18  |
| Unigene119103 | Potri.015G014800.1 | 1.4222  | 18.1774  | -3.6759 | Down | 2.72E-57  | 3.07E-56  |
| Unigene14853  | Potri.008G078900.1 | 4.4654  | 57.0941  | -3.6765 | Down | 8.55E-174 | 3.70E-172 |
| Unigene44384  | Potri.006G018700.1 | 2.0611  | 26.3603  | -3.6769 | Down | 3.67E-80  | 6.04E-79  |
| Unigene69023  | Potri.007G131500.1 | 7.1208  | 91.0865  | -3.6771 | Down | 3.07E-161 | 1.21E-159 |
| Unigene99794  | Potri.014G145900.2 | 0.8232  | 10.5313  | -3.6773 | Down | 4.03E-42  | 3.32E-41  |
| Unigene77980  | Potri.016G017300.1 | 5.1008  | 65.258   | -3.6774 | Down | 9.86E-83  | 1.68E-81  |
| Unigene16726  | Potri.001G439600.1 | 0.9339  | 11.9487  | -3.6774 | Down | 4.03E-42  | 3.32E-41  |
| Unigene106563 | Potri.002G085100.3 | 1.7278  | 22.1183  | -3.6782 | Down | 1.07E-44  | 9.29E-44  |
| Unigene28054  | Potri.018G087300.3 | 1.672   | 21.409   | -3.6786 | Down | 1.38E-67  | 1.87E-66  |
| Unigene27865  | Potri.002G257700.1 | 1.3536  | 17.338   | -3.6791 | Down | 2.83E-47  | 2.61E-46  |
| Unigene61033  | Potri.006G041100.1 | 4.6907  | 60.0951  | -3.6794 | Down | 2.67E-212 | 1.48E-210 |
| Unigene6605   | Potri.003G093100.1 | 1.0052  | 12.8821  | -3.6798 | Down | 7.51E-50  | 7.31E-49  |
| Unigene47118  | Potri.009G094500.1 | 0.4538  | 5.8176   | -3.6803 | Down | 6.43E-27  | 3.57E-26  |
| Unigene23447  | Potri.008G125500.2 | 4.2844  | 54.9379  | -3.6806 | Down | 2.86E-131 | 8.59E-130 |
| Unigene101861 | Potri.001G169000.1 | 0.6115  | 7.8454   | -3.6814 | Down | 1.67E-29  | 1.00E-28  |
| Unigene35836  | Potri.013G115700.1 | 2.2049  | 28.3078  | -3.6824 | Down | 4.37E-32  | 2.81E-31  |
| Unigene99072  | Potri.003G087700.6 | 1.0127  | 13.0011  | -3.6824 | Down | 4.37E-32  | 2.81E-31  |
| Unigene15649  | Potri.017G076800.1 | 6.4793  | 83.2004  | -3.6827 | Down | 7.22E-96  | 1.46E-94  |
| Unigene77509  | Potri.006G040800.2 | 23.8975 | 306.8688 | -3.6827 | Down | 0         | 0         |
| Unigene38525  | Potri.007G135400.1 | 1.3815  | 17.7456  | -3.6832 | Down | 7.22E-68  | 9.81E-67  |
| Unigene105947 | Potri.015G084500.1 | 0.368   | 4.7293   | -3.6838 | Down | 3.01E-37  | 2.21E-36  |
| Unigene104272 | Potri.003G121300.1 | 0.5378  | 6.9114   | -3.6838 | Down | 3.01E-37  | 2.21E-36  |
| Unigene74087  | Potri.015G054600.1 | 4.8803  | 62.719   | -3.6839 | Down | 5.18E-73  | 7.62E-72  |
| Unigene30010  | Potri.004G117100.1 | 1.4499  | 18.6477  | -3.685  | Down | 9.91E-206 | 5.33E-204 |
| Unigene15352  | Potri.013G149500.1 | 3.3177  | 42.6765  | -3.6852 | Down | 7.20E-86  | 1.28E-84  |
| Unigene26855  | Potri.014G060500.1 | 4.3746  | 56.3089  | -3.6861 | Down | 1.01E-98  | 2.14E-97  |
| Unigene119162 | Potri.005G188700.1 | 2.4204  | 31.1586  | -3.6863 | Down | 2.73E-101 | 5.94E-100 |
| Unigene16460  | Potri.010G127600.1 | 3.0478  | 39.247   | -3.6867 | Down | 2.77E-55  | 3.01E-54  |
| Unigene21833  | Potri.010G038300.1 | 4.195   | 54.0941  | -3.6887 | Down | 0         | 0         |
| Unigene23088  | Potri.014G146100.1 | 7.681   | 99.1151  | -3.6897 | Down | 0         | 0         |
| Unigene32667  | Potri.005G086500.1 | 7.0756  | 91.3186  | -3.69   | Down | 0         | 0         |
| Unigene42560  | Potri.002G107800.1 | 12.2408 | 158.0338 | -3.6905 | Down | 0         | 0         |
| Unigene59786  | Potri.018G149300.1 | 0.511   | 6.6058   | -3.6923 | Down | 5.30E-09  | 1.43E-08  |
| Unigene116782 | Potri.018G097600.1 | 0.3381  | 4.3706   | -3.6923 | Down | 5.30E-09  | 1.43E-08  |
| Unigene115837 | Potri.017G087500.5 | 0.2487  | 3.2148   | -3.6923 | Down | 2.34E-06  | 5.22E-06  |
| Unigene109991 | Potri.014G196800.1 | 0.511   | 6.6058   | -3.6923 | Down | 5.30E-09  | 1.43E-08  |
| Unigene3877   | Potri.014G038100.1 | 0.4363  | 5.64     | -3.6923 | Down | 1.26E-11  | 3.94E-11  |



|               |                    |        |         |         |      |           |           |
|---------------|--------------------|--------|---------|---------|------|-----------|-----------|
| Unigene116591 | Potri.013G094700.1 | 0.3454 | 4.465   | -3.6923 | Down | 5.30E-09  | 1.43E-08  |
| Unigene117450 | Potri.013G019300.1 | 0.3083 | 3.9853  | -3.6923 | Down | 5.30E-09  | 1.43E-08  |
| Unigene21061  | Potri.012G077000.1 | 0.3859 | 4.9885  | -3.6923 | Down | 5.30E-09  | 1.43E-08  |
| Unigene97870  | Potri.009G030000.2 | 0.3316 | 4.2864  | -3.6923 | Down | 2.34E-06  | 5.22E-06  |
| Unigene113311 | Potri.006G200800.1 | 0.2949 | 3.812   | -3.6923 | Down | 2.34E-06  | 5.22E-06  |
| Unigene101404 | Potri.004G167500.1 | 0.3258 | 4.2115  | -3.6923 | Down | 2.34E-06  | 5.22E-06  |
| Unigene108870 | Potri.001G406400.1 | 0.5329 | 6.8889  | -3.6923 | Down | 5.30E-09  | 1.43E-08  |
| Unigene95260  | Potri.T041300.3    | 0.7005 | 9.0558  | -3.6924 | Down | 1.26E-11  | 3.94E-11  |
| Unigene25283  | Potri.017G007000.5 | 0.4011 | 5.1852  | -3.6924 | Down | 5.30E-09  | 1.43E-08  |
| Unigene98220  | Potri.013G002200.2 | 0.706  | 9.1272  | -3.6924 | Down | 7.75E-17  | 3.05E-16  |
| Unigene96405  | Potri.009G126700.1 | 0.5195 | 6.7162  | -3.6924 | Down | 3.35E-27  | 1.87E-26  |
| Unigene114937 | Potri.009G033900.4 | 0.4011 | 5.1852  | -3.6924 | Down | 5.30E-09  | 1.43E-08  |
| Unigene110806 | Potri.007G123200.1 | 0.3301 | 4.2675  | -3.6924 | Down | 2.34E-06  | 5.22E-06  |
| Unigene104073 | Potri.007G023000.1 | 0.8756 | 11.3198 | -3.6924 | Down | 3.35E-27  | 1.87E-26  |
| Unigene103166 | Potri.001G068100.1 | 0.2446 | 3.1621  | -3.6924 | Down | 2.34E-06  | 5.22E-06  |
| Unigene113502 | Potri.018G040600.1 | 0.2914 | 3.7674  | -3.6925 | Down | 2.34E-06  | 5.22E-06  |
| Unigene101266 | Potri.015G086600.1 | 0.3475 | 4.4928  | -3.6925 | Down | 5.30E-09  | 1.43E-08  |
| Unigene112551 | Potri.013G103900.1 | 0.9172 | 11.8579 | -3.6925 | Down | 7.75E-17  | 3.06E-16  |
| Unigene72084  | Potri.010G140100.2 | 0.3639 | 4.7046  | -3.6925 | Down | 2.34E-06  | 5.22E-06  |
| Unigene98738  | Potri.009G018900.2 | 0.411  | 5.3137  | -3.6925 | Down | 1.26E-11  | 3.94E-11  |
| Unigene101193 | Potri.009G009800.1 | 0.2884 | 3.7285  | -3.6925 | Down | 5.30E-09  | 1.43E-08  |
| Unigene12241  | Potri.008G028700.1 | 1.9242 | 24.8766 | -3.6925 | Down | 7.42E-102 | 1.63E-100 |
| Unigene116926 | Potri.006G069300.2 | 0.4414 | 5.7068  | -3.6925 | Down | 1.26E-11  | 3.94E-11  |
| Unigene119361 | Potri.004G168600.9 | 1.4105 | 18.2353 | -3.6925 | Down | 5.25E-71  | 7.49E-70  |
| Unigene96530  | Potri.002G166100.1 | 0.3008 | 3.8889  | -3.6925 | Down | 2.34E-06  | 5.22E-06  |
| Unigene107592 | Potri.002G111000.1 | 0.3693 | 4.7745  | -3.6925 | Down | 2.34E-06  | 5.22E-06  |
| Unigene100895 | Potri.018G124100.1 | 0.3569 | 4.6146  | -3.6926 | Down | 2.34E-06  | 5.22E-06  |
| Unigene112167 | Potri.015G038700.1 | 0.3108 | 4.0185  | -3.6926 | Down | 2.34E-06  | 5.22E-06  |
| Unigene112101 | Potri.015G036400.1 | 0.3121 | 4.0353  | -3.6926 | Down | 2.34E-06  | 5.22E-06  |
| Unigene117337 | Potri.006G004200.1 | 0.4179 | 5.4031  | -3.6926 | Down | 1.26E-11  | 3.94E-11  |
| Unigene117515 | Potri.005G076200.4 | 0.3057 | 3.9526  | -3.6926 | Down | 5.30E-09  | 1.43E-08  |
| Unigene109170 | Potri.005G046000.1 | 0.3502 | 4.5279  | -3.6926 | Down | 2.34E-06  | 5.22E-06  |
| Unigene106667 | Potri.004G178000.2 | 0.61   | 7.8868  | -3.6926 | Down | 1.96E-19  | 8.55E-19  |
| Unigene104679 | Potri.002G195300.3 | 0.2869 | 3.7094  | -3.6926 | Down | 2.34E-06  | 5.22E-06  |
| Unigene119217 | Potri.001G414000.1 | 0.3569 | 4.6146  | -3.6926 | Down | 7.75E-17  | 3.05E-16  |
| Unigene115405 | Potri.001G275800.2 | 0.259  | 3.3488  | -3.6926 | Down | 2.34E-06  | 5.22E-06  |
| Unigene26732  | Potri.001G255400.1 | 0.6996 | 9.0452  | -3.6926 | Down | 1.09E-42  | 9.13E-42  |
| Unigene64115  | Potri.019G122900.1 | 0.3586 | 4.6368  | -3.6927 | Down | 2.34E-06  | 5.22E-06  |
| Unigene115283 | Potri.019G059200.1 | 0.2608 | 3.3722  | -3.6927 | Down | 2.34E-06  | 5.22E-06  |

|               |                    |         |          |         |      |           |           |
|---------------|--------------------|---------|----------|---------|------|-----------|-----------|
| Unigene99566  | Potri.019G056500.3 | 0.279   | 3.6076   | -3.6927 | Down | 5.30E-09  | 1.43E-08  |
| Unigene104916 | Potri.013G026900.1 | 0.3032  | 3.9205   | -3.6927 | Down | 1.26E-11  | 3.94E-11  |
| Unigene102637 | Potri.011G106400.1 | 0.2608  | 3.3722   | -3.6927 | Down | 2.34E-06  | 5.22E-06  |
| Unigene105475 | Potri.006G068300.1 | 0.3615  | 4.6742   | -3.6927 | Down | 7.75E-17  | 3.06E-16  |
| Unigene112795 | Potri.001G418800.3 | 0.3032  | 3.9205   | -3.6927 | Down | 2.34E-06  | 5.22E-06  |
| Unigene11780  | Potri.013G033200.1 | 15.3209 | 198.247  | -3.6937 | Down | 0         | 0         |
| Unigene66383  | Potri.007G097500.2 | 8.208   | 106.2277 | -3.694  | Down | 7.35E-205 | 3.93E-203 |
| Unigene43350  | Potri.001G144300.1 | 2.8193  | 36.5099  | -3.6949 | Down | 4.83E-259 | 3.50E-257 |
| Unigene91937  | Potri.018G081700.1 | 11.7084 | 151.6406 | -3.695  | Down | 0         | 0         |
| Unigene56653  | Potri.001G085100.1 | 5.0311  | 65.1686  | -3.6952 | Down | 1.12E-225 | 6.72E-224 |
| Unigene35286  | Potri.001G438700.1 | 2.3391  | 30.3092  | -3.6957 | Down | 5.34E-97  | 1.10E-95  |
| Unigene21451  | Potri.014G111400.1 | 8.0281  | 104.0471 | -3.696  | Down | 0         | 0         |
| Unigene119420 | Potri.005G233400.2 | 1.1244  | 14.5889  | -3.6976 | Down | 5.35E-61  | 6.47E-60  |
| Unigene5697   | Potri.001G411000.1 | 0.5581  | 7.2487   | -3.6991 | Down | 4.00E-48  | 3.76E-47  |
| Unigene66338  | Potri.001G063300.3 | 2.6433  | 34.3315  | -3.6991 | Down | 4.00E-48  | 3.76E-47  |
| Unigene87554  | Potri.002G180800.3 | 10.1191 | 131.5844 | -3.7008 | Down | 3.05E-224 | 1.81E-222 |
| Unigene111263 | Potri.010G079300.1 | 2.2606  | 29.3996  | -3.701  | Down | 8.18E-38  | 6.09E-37  |
| Unigene2285   | Potri.017G134800.1 | 2.7017  | 35.1458  | -3.7014 | Down | 3.47E-175 | 1.52E-173 |
| Unigene35814  | Potri.004G061900.1 | 1.1184  | 14.5498  | -3.7015 | Down | 2.83E-105 | 6.42E-104 |
| Unigene45362  | Potri.010G120100.1 | 4.8621  | 63.2711  | -3.7019 | Down | 0         | 0         |
| Unigene94538  | Potri.004G153800.1 | 0.991   | 12.8968  | -3.702  | Down | 1.99E-66  | 2.65E-65  |
| Unigene40671  | Potri.001G188700.1 | 1.6043  | 20.8848  | -3.7024 | Down | 1.19E-32  | 7.75E-32  |
| Unigene16801  | Potri.019G081800.1 | 1.0539  | 13.7242  | -3.7029 | Down | 2.79E-61  | 3.39E-60  |
| Unigene95734  | Potri.016G041300.1 | 1.1841  | 15.4362  | -3.7045 | Down | 1.74E-27  | 9.83E-27  |
| Unigene119043 | Potri.003G024200.1 | 0.6049  | 7.8922   | -3.7057 | Down | 6.72E-25  | 3.51E-24  |
| Unigene106660 | Potri.001G039600.1 | 0.416   | 5.4277   | -3.7057 | Down | 6.72E-25  | 3.51E-24  |
| Unigene52181  | Potri.012G002100.7 | 3.7157  | 48.4994  | -3.7063 | Down | 2.77E-69  | 3.86E-68  |
| Unigene81898  | Potri.002G079900.1 | 23.3666 | 305.0636 | -3.7066 | Down | 0         | 0         |
| Unigene105047 | Potri.010G035400.3 | 0.3557  | 4.646    | -3.7073 | Down | 2.61E-22  | 1.25E-21  |
| Unigene10008  | Potri.001G344100.3 | 0.972   | 12.697   | -3.7074 | Down | 2.61E-22  | 1.25E-21  |
| Unigene19091  | Potri.005G049800.1 | 2.0955  | 27.3922  | -3.7084 | Down | 1.12E-40  | 8.95E-40  |
| Unigene105060 | Potri.014G026700.1 | 0.8703  | 11.3858  | -3.7096 | Down | 1.02E-19  | 4.49E-19  |
| Unigene4028   | Potri.004G184200.1 | 0.5828  | 7.6244   | -3.7096 | Down | 1.02E-19  | 4.49E-19  |
| Unigene106497 | Potri.001G392500.4 | 0.4592  | 6.0126   | -3.7108 | Down | 1.62E-35  | 1.14E-34  |
| Unigene100657 | Potri.001G079000.7 | 1.1769  | 15.4108  | -3.7109 | Down | 1.62E-35  | 1.14E-34  |
| Unigene94117  | Potri.005G007900.1 | 6.4155  | 84.0675  | -3.7119 | Down | 0         | 0         |
| Unigene106618 | Potri.016G088000.2 | 0.3083  | 4.0407   | -3.7122 | Down | 4.03E-17  | 1.61E-16  |
| Unigene118417 | Potri.004G084900.2 | 0.511   | 6.6975   | -3.7122 | Down | 4.03E-17  | 1.61E-16  |
| Unigene11783  | Potri.003G153200.1 | 3.3781  | 44.2795  | -3.7124 | Down | 5.27E-190 | 2.58E-188 |

|               |                    |         |          |         |      |           |           |
|---------------|--------------------|---------|----------|---------|------|-----------|-----------|
| Unigene115731 | Potri.001G395900.1 | 0.7535  | 9.8772   | -3.7124 | Down | 4.03E-17  | 1.61E-16  |
| Unigene105842 | Potri.001G130800.3 | 0.2506  | 3.285    | -3.7124 | Down | 4.03E-17  | 1.61E-16  |
| Unigene118555 | Potri.016G055000.2 | 0.4929  | 6.4615   | -3.7125 | Down | 4.03E-17  | 1.61E-16  |
| Unigene90203  | Potri.007G010200.7 | 16.1134 | 211.4278 | -3.7138 | Down | 0         | 0         |
| Unigene107089 | Potri.011G071300.2 | 0.3238  | 4.2557   | -3.7162 | Down | 1.61E-14  | 5.75E-14  |
| Unigene37829  | Potri.006G218800.1 | 0.6709  | 8.8176   | -3.7162 | Down | 1.61E-14  | 5.75E-14  |
| Unigene112832 | Potri.001G204700.2 | 0.7551  | 9.9243   | -3.7162 | Down | 1.61E-14  | 5.75E-14  |
| Unigene71258  | Potri.017G095600.1 | 1.8465  | 24.2703  | -3.7163 | Down | 9.06E-28  | 5.16E-27  |
| Unigene52449  | Potri.006G010600.1 | 1.2601  | 16.5628  | -3.7163 | Down | 9.06E-28  | 5.16E-27  |
| Unigene118322 | Potri.015G090700.1 | 0.4357  | 5.7273   | -3.7164 | Down | 1.61E-14  | 5.75E-14  |
| Unigene108735 | Potri.013G051200.1 | 0.8923  | 11.7287  | -3.7164 | Down | 1.61E-14  | 5.75E-14  |
| Unigene118257 | Potri.004G126800.1 | 0.4419  | 5.8088   | -3.7164 | Down | 1.61E-14  | 5.75E-14  |
| Unigene103156 | Potri.002G249100.1 | 0.5313  | 6.9838   | -3.7164 | Down | 1.61E-14  | 5.75E-14  |
| Unigene84588  | Potri.016G017300.1 | 3.1971  | 42.0509  | -3.7173 | Down | 1.05E-64  | 1.36E-63  |
| Unigene20874  | Potri.001G200400.3 | 1.9269  | 25.3567  | -3.718  | Down | 2.22E-38  | 1.67E-37  |
| Unigene9300   | Potri.005G129500.3 | 0.4922  | 6.4815   | -3.719  | Down | 3.50E-25  | 1.84E-24  |
| Unigene103029 | Potri.005G105100.1 | 0.4048  | 5.3334   | -3.7198 | Down | 8.42E-36  | 5.97E-35  |
| Unigene26801  | Potri.018G009300.1 | 0.5317  | 7.006    | -3.7199 | Down | 8.42E-36  | 5.97E-35  |
| Unigene32506  | Potri.004G233500.1 | 11.6208 | 153.1841 | -3.7205 | Down | 0         | 0         |
| Unigene38996  | Potri.010G068100.1 | 2.4788  | 32.6823  | -3.7208 | Down | 5.53E-57  | 6.22E-56  |
| Unigene119000 | Potri.019G007600.1 | 0.2743  | 3.6196   | -3.722  | Down | 6.56E-12  | 2.07E-11  |
| Unigene117502 | Potri.011G049400.1 | 0.4088  | 5.3947   | -3.7221 | Down | 6.56E-12  | 2.07E-11  |
| Unigene104279 | Potri.010G234400.2 | 0.4251  | 5.6099   | -3.7221 | Down | 6.56E-12  | 2.07E-11  |
| Unigene115958 | Potri.011G024800.3 | 0.4908  | 6.4772   | -3.7222 | Down | 6.56E-12  | 2.07E-11  |
| Unigene103368 | Potri.008G022300.8 | 0.746   | 9.8454   | -3.7222 | Down | 6.56E-12  | 2.07E-11  |
| Unigene116489 | Potri.007G127000.1 | 0.4648  | 6.1342   | -3.7222 | Down | 6.56E-12  | 2.07E-11  |
| Unigene21611  | Potri.004G211700.1 | 1.1218  | 14.8051  | -3.7222 | Down | 3.21E-33  | 2.13E-32  |
| Unigene100588 | Potri.001G343800.3 | 0.4844  | 6.3931   | -3.7222 | Down | 6.56E-12  | 2.07E-11  |
| Unigene16170  | Potri.001G334700.1 | 0.5272  | 6.9579   | -3.7222 | Down | 6.56E-12  | 2.07E-11  |
| Unigene117562 | Potri.009G168100.3 | 0.4032  | 5.3218   | -3.7223 | Down | 6.56E-12  | 2.07E-11  |
| Unigene112803 | Potri.006G149400.1 | 0.604   | 7.972    | -3.7223 | Down | 6.56E-12  | 2.07E-11  |
| Unigene116975 | Potri.001G114000.2 | 0.4401  | 5.8085   | -3.7223 | Down | 6.56E-12  | 2.07E-11  |
| Unigene31003  | Potri.010G167600.1 | 5.4275  | 71.6615  | -3.7228 | Down | 8.27E-126 | 2.36E-124 |
| Unigene19473  | Potri.001G103400.2 | 3.9898  | 52.6806  | -3.7229 | Down | 3.00E-115 | 7.68E-114 |
| Unigene78449  | Potri.010G130800.3 | 58.2314 | 768.9448 | -3.723  | Down | 0         | 0         |
| Unigene86650  | Potri.005G007900.1 | 5.8894  | 77.8588  | -3.7247 | Down | 1.16E-128 | 3.41E-127 |
| Unigene88195  | Potri.001G348300.1 | 17.5727 | 232.3169 | -3.7247 | Down | 0         | 0         |
| Unigene93881  | Potri.T016900.1    | 8.6808  | 114.8235 | -3.7254 | Down | 0         | 0         |
| Unigene29491  | Potri.017G025900.1 | 1.4001  | 18.5253  | -3.7259 | Down | 3.63E-171 | 1.54E-169 |

|               |                    |         |           |         |      |           |           |
|---------------|--------------------|---------|-----------|---------|------|-----------|-----------|
| Unigene119179 | Potri.007G130300.1 | 0.4316  | 5.7123    | -3.7263 | Down | 5.30E-20  | 2.36E-19  |
| Unigene37510  | Potri.006G080100.3 | 0.7019  | 9.2901    | -3.7264 | Down | 5.30E-20  | 2.36E-19  |
| Unigene93288  | Potri.019G094100.1 | 76.2732 | 1009.8968 | -3.7269 | Down | 0         | 0         |
| Unigene16555  | Potri.008G088500.1 | 3.4727  | 46.0051   | -3.7277 | Down | 2.84E-73  | 4.20E-72  |
| Unigene106244 | Potri.004G068500.2 | 0.6279  | 8.3212    | -3.7282 | Down | 4.71E-28  | 2.70E-27  |
| Unigene43483  | Potri.005G145300.3 | 9.3788  | 124.3593  | -3.729  | Down | 0         | 0         |
| Unigene35903  | Potri.011G128700.1 | 0.616   | 8.1845    | -3.7319 | Down | 1.82E-25  | 9.64E-25  |
| Unigene116395 | Potri.004G089100.1 | 0.3519  | 4.6756    | -3.7319 | Down | 2.75E-09  | 7.53E-09  |
| Unigene58931  | Potri.003G006100.1 | 0.5157  | 6.8519    | -3.7319 | Down | 2.75E-09  | 7.53E-09  |
| Unigene24546  | Potri.013G082200.1 | 0.5229  | 6.9479    | -3.732  | Down | 2.75E-09  | 7.53E-09  |
| Unigene110917 | Potri.011G062100.1 | 0.9859  | 13.1      | -3.732  | Down | 2.09E-17  | 8.44E-17  |
| Unigene47033  | Potri.010G241000.2 | 0.3639  | 4.8353    | -3.732  | Down | 2.09E-17  | 8.44E-17  |
| Unigene100363 | Potri.008G074300.3 | 0.2884  | 3.8321    | -3.732  | Down | 2.75E-09  | 7.53E-09  |
| Unigene104230 | Potri.007G062700.1 | 0.8811  | 11.7075   | -3.732  | Down | 2.09E-17  | 8.44E-17  |
| Unigene98362  | Potri.013G108200.1 | 0.2443  | 3.2464    | -3.7321 | Down | 2.75E-09  | 7.53E-09  |
| Unigene48089  | Potri.003G056900.1 | 0.4823  | 6.4088    | -3.7321 | Down | 2.75E-09  | 7.53E-09  |
| Unigene97546  | Potri.002G017500.1 | 0.3832  | 5.092     | -3.7321 | Down | 2.75E-09  | 7.53E-09  |
| Unigene116527 | Potri.001G166400.3 | 0.3475  | 4.6176    | -3.7321 | Down | 2.75E-09  | 7.53E-09  |
| Unigene41571  | Potri.018G053000.1 | 1.7963  | 23.9062   | -3.7343 | Down | 5.75E-47  | 5.27E-46  |
| Unigene22693  | Potri.009G028800.1 | 5.6273  | 74.9223   | -3.7349 | Down | 0         | 0         |
| Unigene24453  | Potri.013G144100.1 | 1.9427  | 25.8692   | -3.7351 | Down | 2.06E-68  | 2.82E-67  |
| Unigene19809  | Potri.013G060200.5 | 1.5253  | 20.3167   | -3.7355 | Down | 6.38E-31  | 3.97E-30  |
| Unigene39945  | Potri.009G053800.1 | 2.7785  | 37.0103   | -3.7355 | Down | 7.77E-90  | 1.45E-88  |
| Unigene104775 | Potri.019G082600.1 | 0.7528  | 10.0279   | -3.7356 | Down | 6.38E-31  | 3.97E-30  |
| Unigene41604  | Potri.005G227700.1 | 1.087   | 14.4839   | -3.736  | Down | 2.11E-52  | 2.17E-51  |
| Unigene3281   | Potri.015G146600.6 | 3.4677  | 46.2202   | -3.7365 | Down | 3.16E-210 | 1.74E-208 |
| Unigene3331   | Potri.014G119800.1 | 3.1733  | 42.315    | -3.7371 | Down | 6.97E-165 | 2.84E-163 |
| Unigene764    | Potri.004G021000.1 | 2.5049  | 33.4385   | -3.7387 | Down | 3.74E-173 | 1.61E-171 |
| Unigene105548 | Potri.014G147700.2 | 0.3028  | 4.0446    | -3.7396 | Down | 8.36E-15  | 3.02E-14  |
| Unigene1780   | Potri.014G152200.1 | 2.1813  | 29.1401   | -3.7397 | Down | 4.01E-82  | 6.75E-81  |
| Unigene118169 | Potri.007G056900.1 | 0.4516  | 6.0326    | -3.7397 | Down | 8.36E-15  | 3.02E-14  |
| Unigene116461 | Potri.T088300.1    | 0.5828  | 7.7859    | -3.7398 | Down | 8.36E-15  | 3.02E-14  |
| Unigene104915 | Potri.013G041700.1 | 1.0275  | 13.7272   | -3.7398 | Down | 2.45E-28  | 1.42E-27  |
| Unigene8547   | Potri.008G040100.3 | 1.6916  | 22.5985   | -3.7398 | Down | 2.92E-55  | 3.17E-54  |
| Unigene43554  | Potri.002G225500.2 | 11.8292 | 158.0428  | -3.7399 | Down | 0         | 0         |
| Unigene36599  | Potri.018G031100.1 | 0.9794  | 13.102    | -3.7417 | Down | 8.67E-34  | 5.82E-33  |
| Unigene6160   | Potri.014G158400.2 | 2.3558  | 31.5137   | -3.7417 | Down | 4.00E-66  | 5.30E-65  |
| Unigene63253  | Potri.018G006000.3 | 5.1552  | 69.0445   | -3.7434 | Down | 6.39E-139 | 2.07E-137 |
| Unigene42320  | Potri.010G189800.5 | 1.6532  | 22.152    | -3.7441 | Down | 1.13E-44  | 9.83E-44  |

|               |                     |         |          |         |      |           |           |
|---------------|---------------------|---------|----------|---------|------|-----------|-----------|
| Unigene22308  | Potri.001G388800.1  | 8.7258  | 117.0475 | -3.7457 | Down | 0         | 0         |
| Unigene38796  | Potri.001G179700.3  | 1.9054  | 25.5667  | -3.7461 | Down | 1.09E-90  | 2.06E-89  |
| Unigene24284  | Potri.011G135700.1  | 4.531   | 60.8444  | -3.7472 | Down | 6.75E-153 | 2.49E-151 |
| Unigene22671  | Potri.006G171400.1  | 3.9158  | 52.6269  | -3.7484 | Down | 3.62E-161 | 1.42E-159 |
| Unigene23164  | Potri.001G360500.1  | 1.6191  | 21.7724  | -3.7492 | Down | 1.08E-74  | 1.63E-73  |
| Unigene114603 | Potri.015G120300.1  | 0.2733  | 3.68     | -3.7511 | Down | 1.21E-06  | 2.76E-06  |
| Unigene105194 | Potri.016G137000.1  | 0.2399  | 3.2303   | -3.7512 | Down | 1.21E-06  | 2.76E-06  |
| Unigene109508 | Potri.015G143800.1  | 0.347   | 4.6727   | -3.7512 | Down | 1.21E-06  | 2.76E-06  |
| Unigene112342 | Potri.009G060500.9  | 0.3083  | 4.1514   | -3.7512 | Down | 1.21E-06  | 2.76E-06  |
| Unigene116687 | Potri.019G128000.2  | 0.4549  | 6.1258   | -3.7513 | Down | 3.40E-12  | 1.09E-11  |
| Unigene96877  | Potri.013G127100.2  | 0.5609  | 7.5536   | -3.7513 | Down | 3.40E-12  | 1.09E-11  |
| Unigene103373 | Potri.012G145500.1  | 0.243   | 3.2724   | -3.7513 | Down | 1.21E-06  | 2.76E-06  |
| Unigene107934 | Potri.012G084800.5  | 0.3657  | 4.9247   | -3.7513 | Down | 1.21E-06  | 2.76E-06  |
| Unigene115979 | Potri.008G167400.1  | 0.2454  | 3.3047   | -3.7513 | Down | 1.21E-06  | 2.76E-06  |
| Unigene108289 | Potri.005G143400.2  | 1.8107  | 24.3842  | -3.7513 | Down | 1.27E-28  | 7.41E-28  |
| Unigene102769 | Potri.005G071500.1  | 0.2446  | 3.2939   | -3.7513 | Down | 1.21E-06  | 2.76E-06  |
| Unigene110034 | Potri.018G019900.1  | 4.069   | 54.798   | -3.7514 | Down | 1.08E-66  | 1.44E-65  |
| Unigene116220 | Potri.018G019100.2  | 0.2391  | 3.22     | -3.7514 | Down | 1.21E-06  | 2.76E-06  |
| Unigene19545  | Potri.010G114000.1  | 0.9087  | 12.238   | -3.7514 | Down | 2.91E-61  | 3.54E-60  |
| Unigene112897 | Potri.006G230900.4  | 0.6016  | 8.1019   | -3.7514 | Down | 3.40E-12  | 1.09E-11  |
| Unigene104395 | Potri.005G129800.1  | 0.3188  | 4.2933   | -3.7514 | Down | 3.40E-12  | 1.09E-11  |
| Unigene113018 | Potri.004G027400.2  | 0.2996  | 4.0347   | -3.7514 | Down | 1.21E-06  | 2.76E-06  |
| Unigene101237 | Potri.001G029400.1  | 0.4844  | 6.5236   | -3.7514 | Down | 1.09E-17  | 4.43E-17  |
| Unigene109236 | Potri.T139400.1     | 0.3502  | 4.7166   | -3.7515 | Down | 1.21E-06  | 2.76E-06  |
| Unigene103670 | Potri.019G061700.1  | 0.259   | 3.4883   | -3.7515 | Down | 1.21E-06  | 2.76E-06  |
| Unigene114395 | Potri.008G086700.5  | 0.2773  | 3.7347   | -3.7515 | Down | 1.21E-06  | 2.76E-06  |
| Unigene109271 | Potri.005G058100.1  | 0.3502  | 4.7166   | -3.7515 | Down | 1.21E-06  | 2.76E-06  |
| Unigene113957 | Potri.004G038800.2  | 0.2847  | 3.8345   | -3.7515 | Down | 1.21E-06  | 2.76E-06  |
| Unigene115445 | Potri.001G388100.1  | 0.2581  | 3.4762   | -3.7515 | Down | 1.21E-06  | 2.76E-06  |
| Unigene115321 | Potri.001G121700.2  | 0.2599  | 3.5005   | -3.7515 | Down | 1.21E-06  | 2.76E-06  |
| Unigene118244 | Potri.001G029400.1  | 0.3552  | 4.784    | -3.7515 | Down | 3.40E-12  | 1.09E-11  |
| Unigene94755  | Potri.T069200.2     | 0.3586  | 4.83     | -3.7516 | Down | 1.21E-06  | 2.76E-06  |
| Unigene105063 | Potri.005G050500.1  | 0.2804  | 3.7768   | -3.7516 | Down | 1.21E-06  | 2.76E-06  |
| Unigene22976  | Potri.009G140500.1  | 15.899  | 214.295  | -3.7526 | Down | 0         | 0         |
| Unigene118899 | Potri.008G010600.5  | 3.1023  | 41.8175  | -3.7527 | Down | 2.26E-118 | 5.98E-117 |
| Unigene51863  | Potri.001G076600.1  | 3.8819  | 52.3681  | -3.7539 | Down | 4.04E-64  | 5.17E-63  |
| Unigene72663  | Potri.012G051800.1  | 10.9388 | 147.6034 | -3.7542 | Down | 1.94E-167 | 8.02E-166 |
| Unigene17042  | Potri.016G031400.1  | 1.7138  | 23.1336  | -3.7547 | Down | 8.07E-48  | 7.54E-47  |
| Unigene16277  | Potri.001G146200.16 | 1.8705  | 25.2491  | -3.7547 | Down | 8.07E-48  | 7.54E-47  |

|               |                     |         |          |         |      |           |           |
|---------------|---------------------|---------|----------|---------|------|-----------|-----------|
| Unigene51289  | Potri.T094400.2     | 18.3457 | 247.6632 | -3.7549 | Down | 0         | 0         |
| Unigene29809  | Potri.005G161900.2  | 1.156   | 15.6091  | -3.7552 | Down | 2.22E-42  | 1.84E-41  |
| Unigene19593  | Potri.019G133500.1  | 2.7328  | 36.9226  | -3.7561 | Down | 2.17E-102 | 4.79E-101 |
| Unigene82352  | Potri.017G150000.1  | 10.2895 | 139.0316 | -3.7562 | Down | 1.15E-197 | 5.87E-196 |
| Unigene51197  | Potri.001G320000.1  | 10.7715 | 145.5875 | -3.7566 | Down | 0         | 0         |
| Unigene93820  | Potri.012G006300.1  | 26.2818 | 355.3609 | -3.7571 | Down | 0         | 0         |
| Unigene86420  | Potri.001G240900.1  | 11.2766 | 152.4635 | -3.7571 | Down | 1.48E-249 | 1.02E-247 |
| Unigene105233 | Potri.004G186200.1  | 0.8289  | 11.2122  | -3.7577 | Down | 4.90E-26  | 2.64E-25  |
| Unigene81392  | Potri.012G070900.2  | 23.4958 | 317.8428 | -3.7578 | Down | 0         | 0         |
| Unigene31967  | Potri.007G078100.1  | 2.7266  | 36.8828  | -3.7578 | Down | 0         | 0         |
| Unigene34180  | Potri.004G151100.1  | 0.7454  | 10.0835  | -3.7578 | Down | 2.91E-75  | 4.45E-74  |
| Unigene60883  | Potri.017G097700.1  | 2.4559  | 33.2396  | -3.7586 | Down | 5.70E-89  | 1.05E-87  |
| Unigene12761  | Potri.009G146500.3  | 2.7096  | 36.673   | -3.7586 | Down | 2.80E-176 | 1.24E-174 |
| Unigene92655  | Potri.005G068200.1  | 1.2105  | 16.3838  | -3.7586 | Down | 3.05E-45  | 2.69E-44  |
| Unigene44894  | Potri.014G042600.1  | 5.3682  | 72.6923  | -3.7593 | Down | 5.06E-160 | 1.97E-158 |
| Unigene40925  | Potri.018G076600.3  | 0.5532  | 7.4922   | -3.7595 | Down | 1.43E-20  | 6.48E-20  |
| Unigene38562  | Potri.017G107600.4  | 1.4532  | 19.6825  | -3.7596 | Down | 5.67E-59  | 6.62E-58  |
| Unigene118514 | Potri.010G013000.1  | 0.5802  | 7.8584   | -3.7596 | Down | 1.43E-20  | 6.48E-20  |
| Unigene102861 | Potri.007G037300.1  | 1.0657  | 14.4339  | -3.7596 | Down | 1.43E-20  | 6.48E-20  |
| Unigene96656  | Potri.012G122700.1  | 0.6115  | 8.2896   | -3.7609 | Down | 2.34E-34  | 1.59E-33  |
| Unigene2499   | Potri.001G076700.2  | 1.6544  | 22.4421  | -3.7618 | Down | 7.86E-62  | 9.64E-61  |
| Unigene6165   | Potri.009G139500.3  | 0.9348  | 12.6901  | -3.7629 | Down | 6.59E-29  | 3.88E-28  |
| Unigene119275 | Potri.005G086500.1  | 1.2547  | 17.0818  | -3.767  | Down | 4.08E-62  | 5.04E-61  |
| Unigene119287 | Potri.002G230000.4  | 0.3381  | 4.6134   | -3.7703 | Down | 5.63E-18  | 2.32E-17  |
| Unigene117621 | Potri.015G059000.3  | 0.3     | 4.0939   | -3.7704 | Down | 1.42E-09  | 3.96E-09  |
| Unigene106871 | Potri.004G234500.1  | 0.2386  | 3.2559   | -3.7704 | Down | 1.42E-09  | 3.96E-09  |
| Unigene36601  | Potri.004G093300.1  | 0.5836  | 7.9637   | -3.7704 | Down | 1.21E-34  | 8.32E-34  |
| Unigene6655   | Potri.002G167300.1  | 1.4698  | 20.0574  | -3.7704 | Down | 8.72E-126 | 2.48E-124 |
| Unigene98200  | Potri.001G285600.1  | 0.4702  | 6.4161   | -3.7704 | Down | 1.42E-09  | 3.96E-09  |
| Unigene117677 | Potri.010G211100.3  | 0.2976  | 4.0613   | -3.7705 | Down | 1.42E-09  | 3.96E-09  |
| Unigene30558  | Potri.007G032500.10 | 1.6217  | 22.131   | -3.7705 | Down | 1.21E-34  | 8.32E-34  |
| Unigene108945 | Potri.002G218100.1  | 0.5303  | 7.2371   | -3.7705 | Down | 1.42E-09  | 3.96E-09  |
| Unigene100279 | Potri.001G471800.4  | 0.8708  | 11.8836  | -3.7705 | Down | 5.63E-18  | 2.32E-17  |
| Unigene116869 | Potri.011G169100.1  | 0.333   | 4.5448   | -3.7706 | Down | 1.42E-09  | 3.96E-09  |
| Unigene98085  | Potri.011G056800.2  | 0.3262  | 4.452    | -3.7706 | Down | 1.42E-09  | 3.96E-09  |
| Unigene106637 | Potri.008G141100.1  | 0.2847  | 3.8856   | -3.7706 | Down | 1.42E-09  | 3.96E-09  |
| Unigene104558 | Potri.013G048700.1  | 0.2326  | 3.1747   | -3.7707 | Down | 1.42E-09  | 3.96E-09  |
| Unigene117816 | Potri.004G043500.1  | 0.2906  | 3.9663   | -3.7707 | Down | 1.42E-09  | 3.96E-09  |
| Unigene8404   | Potri.011G076400.1  | 3.9016  | 53.258   | -3.7709 | Down | 1.74E-277 | 1.38E-275 |

|               |                    |         |          |         |      |           |           |
|---------------|--------------------|---------|----------|---------|------|-----------|-----------|
| Unigene471    | Potri.003G192500.1 | 2.9092  | 39.7375  | -3.7718 | Down | 5.68E-79  | 9.18E-78  |
| Unigene29228  | Potri.005G181600.2 | 2.5261  | 34.5106  | -3.7721 | Down | 1.72E-131 | 5.18E-130 |
| Unigene82420  | Potri.005G006000.2 | 2.2866  | 31.2552  | -3.7728 | Down | 8.20E-46  | 7.33E-45  |
| Unigene84649  | Potri.017G096200.1 | 1.7318  | 23.6806  | -3.7734 | Down | 1.65E-37  | 1.22E-36  |
| Unigene104428 | Potri.011G017200.1 | 0.8163  | 11.1626  | -3.7734 | Down | 1.65E-37  | 1.22E-36  |
| Unigene31779  | Potri.008G162500.4 | 7.4788  | 102.2737 | -3.7735 | Down | 0         | 0         |
| Unigene104554 | Potri.018G118000.2 | 0.3773  | 5.16     | -3.7736 | Down | 1.65E-37  | 1.22E-36  |
| Unigene76528  | Potri.009G124400.1 | 1.1553  | 15.8251  | -3.7759 | Down | 7.40E-21  | 3.39E-20  |
| Unigene74019  | Potri.008G164400.1 | 15.6867 | 215.0096 | -3.7768 | Down | 2.94E-251 | 2.03E-249 |
| Unigene75120  | Potri.001G212300.1 | 4.9392  | 67.7093  | -3.777  | Down | 4.11E-82  | 6.92E-81  |
| Unigene25504  | Potri.003G131200.1 | 0.8786  | 12.047   | -3.7773 | Down | 4.63E-32  | 2.98E-31  |
| Unigene93013  | Potri.008G193000.1 | 14.8915 | 204.5167 | -3.7797 | Down | 0         | 0         |
| Unigene118695 | Potri.018G019700.1 | 0.9443  | 12.9712  | -3.7799 | Down | 6.29E-35  | 4.34E-34  |
| Unigene47144  | Potri.006G003800.2 | 0.3188  | 4.3792   | -3.7799 | Down | 1.76E-12  | 5.72E-12  |
| Unigene118780 | Potri.005G142300.1 | 0.3051  | 4.1911   | -3.78   | Down | 1.76E-12  | 5.72E-12  |
| Unigene48241  | Potri.001G081900.1 | 1.8572  | 25.5118  | -3.78   | Down | 6.29E-35  | 4.34E-34  |
| Unigene117168 | Potri.001G065800.3 | 0.4287  | 5.8892   | -3.78   | Down | 1.76E-12  | 5.72E-12  |
| Unigene118466 | Potri.006G145200.1 | 0.336   | 4.6159   | -3.7801 | Down | 1.76E-12  | 5.72E-12  |
| Unigene118869 | Potri.003G117300.1 | 0.2925  | 4.0185   | -3.7801 | Down | 1.76E-12  | 5.72E-12  |
| Unigene37226  | Potri.011G069500.1 | 0.416   | 5.7265   | -3.783  | Down | 1.32E-26  | 7.24E-26  |
| Unigene26042  | Potri.010G167600.1 | 6.7392  | 92.8243  | -3.7839 | Down | 0         | 0         |
| Unigene50927  | Potri.017G085000.1 | 0.8467  | 11.6667  | -3.7844 | Down | 1.11E-54  | 1.20E-53  |
| Unigene99375  | Potri.013G119600.2 | 0.5893  | 8.1259   | -3.7855 | Down | 1.77E-29  | 1.06E-28  |
| Unigene6949   | Potri.013G130300.1 | 1.7308  | 23.8687  | -3.7856 | Down | 1.54E-57  | 1.75E-56  |
| Unigene4073   | Potri.006G051100.1 | 1.4685  | 20.2508  | -3.7856 | Down | 1.77E-29  | 1.06E-28  |
| Unigene92824  | Potri.001G213500.1 | 6.2288  | 85.8969  | -3.7856 | Down | 2.77E-239 | 1.80E-237 |
| Unigene104007 | Potri.004G231500.1 | 0.2775  | 3.8272   | -3.7857 | Down | 2.24E-15  | 8.31E-15  |
| Unigene8683   | Potri.007G078600.1 | 8.6973  | 119.976  | -3.786  | Down | 6.39E-273 | 4.95E-271 |
| Unigene111556 | Potri.017G096600.1 | 1.7534  | 24.2142  | -3.7876 | Down | 2.40E-32  | 1.55E-31  |
| Unigene37023  | Potri.007G021400.1 | 0.6358  | 8.7905   | -3.7893 | Down | 2.91E-18  | 1.22E-17  |
| Unigene118394 | Potri.006G168400.1 | 0.5133  | 7.0969   | -3.7893 | Down | 2.91E-18  | 1.22E-17  |
| Unigene97760  | Potri.013G161500.7 | 0.4721  | 6.528    | -3.7895 | Down | 2.91E-18  | 1.22E-17  |
| Unigene22359  | Potri.006G201900.1 | 0.9672  | 13.3842  | -3.7906 | Down | 1.56E-91  | 2.98E-90  |
| Unigene54179  | Potri.015G144800.1 | 16.4882 | 228.2216 | -3.7909 | Down | 0         | 0         |
| Unigene27671  | Potri.003G106400.3 | 2.0551  | 28.4507  | -3.7912 | Down | 7.99E-58  | 9.13E-57  |
| Unigene21876  | Potri.013G115700.1 | 1.2573  | 17.4086  | -3.7914 | Down | 1.87E-153 | 6.92E-152 |
| Unigene44207  | Potri.011G146500.1 | 1.5297  | 21.1796  | -3.7914 | Down | 9.02E-134 | 2.79E-132 |
| Unigene36329  | Potri.010G244100.1 | 0.5796  | 8.0281   | -3.7919 | Down | 6.08E-41  | 4.88E-40  |
| Unigene109404 | Potri.001G454500.1 | 2.4402  | 33.8006  | -3.792  | Down | 6.08E-41  | 4.88E-40  |

|               |                     |         |          |         |      |           |           |
|---------------|---------------------|---------|----------|---------|------|-----------|-----------|
| Unigene118683 | Potri.008G106700.1  | 1.1063  | 15.3249  | -3.7921 | Down | 6.08E-41  | 4.88E-40  |
| Unigene9138   | Potri.T001800.1     | 0.9885  | 13.7027  | -3.7931 | Down | 8.33E-44  | 7.12E-43  |
| Unigene118733 | Potri.005G181200.1  | 0.6994  | 9.7114   | -3.7955 | Down | 6.82E-27  | 3.78E-26  |
| Unigene49552  | Potri.015G139900.1  | 2.9502  | 40.9798  | -3.796  | Down | 1.11E-80  | 1.83E-79  |
| Unigene427    | Potri.007G135400.1  | 4.7393  | 65.853   | -3.7965 | Down | 0         | 0         |
| Unigene16765  | Potri.010G089800.1  | 8.9153  | 123.9303 | -3.7971 | Down | 0         | 0         |
| Unigene32722  | Potri.010G130800.1  | 65.3407 | 908.6056 | -3.7976 | Down | 0         | 0         |
| Unigene114483 | Potri.014G026700.1  | 1.5196  | 21.1344  | -3.7978 | Down | 1.24E-32  | 8.12E-32  |
| Unigene26695  | Potri.012G006300.1  | 19.7778 | 275.058  | -3.7978 | Down | 0         | 0         |
| Unigene45472  | Potri.001G122800.1  | 0.846   | 11.7656  | -3.7978 | Down | 7.95E-64  | 1.01E-62  |
| Unigene100524 | Potri.006G127500.2  | 0.7079  | 9.8556   | -3.7993 | Down | 2.96E-75  | 4.52E-74  |
| Unigene11575  | Potri.011G003300.1  | 14.0116 | 195.6456 | -3.8035 | Down | 0         | 0         |
| Unigene32536  | Potri.011G158500.1  | 2.7867  | 38.9727  | -3.8058 | Down | 9.56E-150 | 3.42E-148 |
| Unigene93614  | Potri.001G146200.10 | 12.9043 | 180.4693 | -3.8058 | Down | 0         | 0         |
| Unigene94472  | Potri.001G348300.1  | 17.9466 | 251.2564 | -3.8074 | Down | 0         | 0         |
| Unigene116843 | Potri.014G169200.1  | 0.2234  | 3.1282   | -3.8076 | Down | 6.24E-07  | 1.46E-06  |
| Unigene118577 | Potri.010G187500.1  | 0.2449  | 3.4294   | -3.8077 | Down | 7.35E-10  | 2.08E-09  |
| Unigene102596 | Potri.005G071500.1  | 0.3412  | 4.7781   | -3.8077 | Down | 7.35E-10  | 2.08E-09  |
| Unigene117071 | Potri.004G167900.1  | 0.2169  | 3.0373   | -3.8077 | Down | 6.24E-07  | 1.46E-06  |
| Unigene98613  | Potri.003G062100.1  | 0.2784  | 3.8986   | -3.8077 | Down | 1.51E-18  | 6.36E-18  |
| Unigene109541 | Potri.017G125500.1  | 0.347   | 4.8596   | -3.8078 | Down | 6.24E-07  | 1.46E-06  |
| Unigene118916 | Potri.014G092900.1  | 0.358   | 5.0135   | -3.8078 | Down | 1.16E-15  | 4.35E-15  |
| Unigene118554 | Potri.009G164300.1  | 0.2465  | 3.452    | -3.8078 | Down | 7.35E-10  | 2.08E-09  |
| Unigene109564 | Potri.007G095100.1  | 0.3454  | 4.8371   | -3.8078 | Down | 6.24E-07  | 1.46E-06  |
| Unigene109780 | Potri.005G164300.1  | 0.3438  | 4.8148   | -3.8078 | Down | 6.24E-07  | 1.46E-06  |
| Unigene107713 | Potri.005G121500.1  | 0.554   | 7.7585   | -3.8078 | Down | 7.35E-10  | 2.08E-09  |
| Unigene100452 | Potri.005G080300.1  | 0.2627  | 3.6789   | -3.8078 | Down | 6.24E-07  | 1.46E-06  |
| Unigene99349  | Potri.004G171300.1  | 0.347   | 4.8596   | -3.8078 | Down | 6.24E-07  | 1.46E-06  |
| Unigene117890 | Potri.002G137000.4  | 0.3826  | 5.358    | -3.8078 | Down | 9.10E-13  | 3.00E-12  |
| Unigene104344 | Potri.002G021600.1  | 0.3454  | 4.8371   | -3.8078 | Down | 1.16E-15  | 4.35E-15  |
| Unigene118923 | Potri.001G029300.1  | 0.2853  | 3.9955   | -3.8078 | Down | 9.10E-13  | 3.00E-12  |
| Unigene76707  | Potri.T067300.1     | 1.6432  | 23.0136  | -3.8079 | Down | 4.76E-30  | 2.89E-29  |
| Unigene113308 | Potri.T039500.1     | 0.4423  | 6.1946   | -3.8079 | Down | 7.35E-10  | 2.08E-09  |
| Unigene104926 | Potri.014G000400.1  | 0.6191  | 8.6707   | -3.8079 | Down | 9.10E-13  | 3.00E-12  |
| Unigene35132  | Potri.012G044900.6  | 1.6885  | 23.6481  | -3.8079 | Down | 6.44E-33  | 4.24E-32  |
| Unigene20283  | Potri.012G006300.1  | 0.8183  | 11.4605  | -3.8079 | Down | 8.75E-36  | 6.20E-35  |
| Unigene113055 | Potri.008G058600.1  | 0.2984  | 4.1793   | -3.8079 | Down | 6.24E-07  | 1.46E-06  |
| Unigene113035 | Potri.005G065800.1  | 0.4494  | 6.2941   | -3.8079 | Down | 7.35E-10  | 2.08E-09  |
| Unigene26573  | Potri.001G289400.6  | 0.8289  | 11.6091  | -3.8079 | Down | 1.51E-18  | 6.36E-18  |



|               |                    |        |          |         |      |           |           |
|---------------|--------------------|--------|----------|---------|------|-----------|-----------|
| Unigene112839 | Potri.014G108100.1 | 0.302  | 4.23     | -3.808  | Down | 6.24E-07  | 1.46E-06  |
| Unigene99035  | Potri.014G078000.1 | 0.4945 | 6.9259   | -3.808  | Down | 1.98E-21  | 9.26E-21  |
| Unigene104506 | Potri.013G034200.1 | 0.3234 | 4.5295   | -3.808  | Down | 7.35E-10  | 2.08E-09  |
| Unigene115947 | Potri.012G048400.1 | 0.3693 | 5.1724   | -3.808  | Down | 7.35E-10  | 2.08E-09  |
| Unigene52711  | Potri.011G137800.1 | 0.7515 | 10.5257  | -3.808  | Down | 8.05E-56  | 8.85E-55  |
| Unigene117776 | Potri.010G051400.3 | 1.1717 | 16.4107  | -3.808  | Down | 8.75E-36  | 6.20E-35  |
| Unigene101694 | Potri.008G202400.1 | 0.4844 | 6.7845   | -3.808  | Down | 9.10E-13  | 3.00E-12  |
| Unigene48796  | Potri.008G078900.1 | 3.3134 | 46.4068  | -3.808  | Down | 1.59E-101 | 3.47E-100 |
| Unigene112317 | Potri.007G143600.1 | 0.9286 | 13.006   | -3.808  | Down | 1.51E-18  | 6.36E-18  |
| Unigene24764  | Potri.007G083600.1 | 0.4567 | 6.3968   | -3.808  | Down | 1.51E-18  | 6.36E-18  |
| Unigene98877  | Potri.006G155200.1 | 0.2897 | 4.0575   | -3.808  | Down | 9.10E-13  | 3.00E-12  |
| Unigene98895  | Potri.006G085900.1 | 0.2546 | 3.5659   | -3.808  | Down | 6.24E-07  | 1.46E-06  |
| Unigene102961 | Potri.006G004200.1 | 0.6182 | 8.6587   | -3.808  | Down | 1.51E-18  | 6.36E-18  |
| Unigene118525 | Potri.005G187300.5 | 0.2481 | 3.475    | -3.808  | Down | 7.35E-10  | 2.08E-09  |
| Unigene112910 | Potri.005G170000.1 | 0.3008 | 4.213    | -3.808  | Down | 6.24E-07  | 1.46E-06  |
| Unigene118752 | Potri.004G115800.1 | 0.3089 | 4.3264   | -3.808  | Down | 9.10E-13  | 3.00E-12  |
| Unigene71399  | Potri.004G035700.1 | 3.3073 | 46.3219  | -3.808  | Down | 5.83E-53  | 6.05E-52  |
| Unigene117310 | Potri.003G073100.2 | 0.3152 | 4.4147   | -3.808  | Down | 7.35E-10  | 2.08E-09  |
| Unigene115204 | Potri.T078300.1    | 0.5253 | 7.3579   | -3.8081 | Down | 9.10E-13  | 3.00E-12  |
| Unigene116561 | Potri.018G121900.1 | 0.3464 | 4.8521   | -3.8081 | Down | 7.35E-10  | 2.08E-09  |
| Unigene104563 | Potri.011G004500.1 | 0.2645 | 3.705    | -3.8081 | Down | 6.24E-07  | 1.46E-06  |
| Unigene102038 | Potri.010G108100.2 | 0.4419 | 6.1897   | -3.8081 | Down | 1.16E-15  | 4.35E-15  |
| Unigene115398 | Potri.007G127400.1 | 0.259  | 3.6278   | -3.8081 | Down | 6.24E-07  | 1.46E-06  |
| Unigene105224 | Potri.004G049400.1 | 0.2773 | 3.8841   | -3.8081 | Down | 6.24E-07  | 1.46E-06  |
| Unigene113228 | Potri.002G183700.3 | 0.444  | 6.2191   | -3.8081 | Down | 7.35E-10  | 2.08E-09  |
| Unigene115369 | Potri.001G414700.1 | 0.259  | 3.6278   | -3.8081 | Down | 6.24E-07  | 1.46E-06  |
| Unigene98329  | Potri.001G295800.1 | 0.2353 | 3.2959   | -3.8081 | Down | 6.24E-07  | 1.46E-06  |
| Unigene114982 | Potri.001G089400.1 | 0.2664 | 3.7315   | -3.8081 | Down | 6.24E-07  | 1.46E-06  |
| Unigene100817 | Potri.013G034400.1 | 0.2614 | 3.6617   | -3.8082 | Down | 7.35E-10  | 2.08E-09  |
| Unigene97840  | Potri.010G048600.3 | 0.2267 | 3.1757   | -3.8082 | Down | 6.24E-07  | 1.46E-06  |
| Unigene102869 | Potri.008G135400.1 | 0.2804 | 3.9279   | -3.8082 | Down | 6.24E-07  | 1.46E-06  |
| Unigene101823 | Potri.004G057900.1 | 0.2295 | 3.2148   | -3.8082 | Down | 6.24E-07  | 1.46E-06  |
| Unigene23885  | Potri.008G136400.1 | 4.4272 | 62.1261  | -3.8107 | Down | 1.90E-230 | 1.17E-228 |
| Unigene10237  | Potri.013G009900.2 | 3.2986 | 46.2904  | -3.8108 | Down | 3.16E-113 | 7.90E-112 |
| Unigene70982  | Potri.T082900.1    | 7.0517 | 98.9636  | -3.8109 | Down | 2.26E-110 | 5.48E-109 |
| Unigene25950  | Potri.016G017300.1 | 2.2085 | 31.0202  | -3.8121 | Down | 5.73E-79  | 9.26E-78  |
| Unigene32761  | Potri.014G020600.1 | 9.8356 | 138.1893 | -3.8125 | Down | 0         | 0         |
| Unigene44856  | Potri.008G186600.1 | 6.4278 | 90.3192  | -3.8126 | Down | 4.51E-205 | 2.42E-203 |
| Unigene707    | Potri.004G182000.1 | 6.3009 | 88.6948  | -3.8152 | Down | 0         | 0         |

|               |                    |         |          |         |      |           |           |
|---------------|--------------------|---------|----------|---------|------|-----------|-----------|
| Unigene114218 | Potri.017G107700.1 | 1.9631  | 27.6462  | -3.8159 | Down | 8.45E-42  | 6.91E-41  |
| Unigene79016  | Potri.014G023100.1 | 2.1758  | 30.6412  | -3.8159 | Down | 8.45E-42  | 6.91E-41  |
| Unigene115349 | Potri.018G055500.1 | 1.5596  | 21.9828  | -3.8171 | Down | 4.53E-36  | 3.23E-35  |
| Unigene15351  | Potri.004G211700.1 | 2.4581  | 34.6583  | -3.8176 | Down | 7.94E-68  | 1.08E-66  |
| Unigene14181  | Potri.001G247400.1 | 0.9983  | 14.0795  | -3.818  | Down | 3.33E-33  | 2.21E-32  |
| Unigene10392  | Potri.004G096000.1 | 20.8656 | 294.3268 | -3.8182 | Down | 0         | 0         |
| Unigene118834 | Potri.009G134700.1 | 0.7445  | 10.5075  | -3.819  | Down | 2.46E-30  | 1.51E-29  |
| Unigene105557 | Potri.006G220700.1 | 0.4163  | 5.8753   | -3.819  | Down | 2.46E-30  | 1.51E-29  |
| Unigene59518  | Potri.002G257400.3 | 2.0905  | 29.5166  | -3.8196 | Down | 2.16E-56  | 2.40E-55  |
| Unigene96439  | Potri.014G092400.1 | 0.6782  | 9.5795   | -3.8202 | Down | 1.83E-27  | 1.03E-26  |
| Unigene41088  | Potri.008G120000.2 | 1.492   | 21.0749  | -3.8202 | Down | 1.83E-27  | 1.03E-26  |
| Unigene7295   | Potri.019G055800.1 | 1.6687  | 23.5824  | -3.8209 | Down | 1.13E-50  | 1.12E-49  |
| Unigene23969  | Potri.006G103200.1 | 0.8088  | 11.4302  | -3.8209 | Down | 1.13E-50  | 1.12E-49  |
| Unigene8366   | Potri.015G096500.1 | 1.4302  | 20.2159  | -3.8212 | Down | 7.94E-74  | 1.18E-72  |
| Unigene7398   | Potri.004G046100.1 | 1.4109  | 19.9501  | -3.8217 | Down | 8.23E-48  | 7.69E-47  |
| Unigene118162 | Potri.012G034300.1 | 1.358   | 19.2148  | -3.8227 | Down | 5.99E-45  | 5.25E-44  |
| Unigene5086   | Potri.004G090700.1 | 0.4936  | 6.9887   | -3.8236 | Down | 1.03E-21  | 4.84E-21  |
| Unigene88741  | Potri.006G195100.2 | 28.1941 | 399.2518 | -3.8238 | Down | 0         | 0         |
| Unigene63956  | Potri.010G155500.1 | 2.0905  | 29.6351  | -3.8254 | Down | 1.12E-56  | 1.25E-55  |
| Unigene79723  | Potri.010G191900.4 | 71.0832 | 1007.924 | -3.8257 | Down | 0         | 0         |
| Unigene52335  | Potri.003G111800.1 | 0.5266  | 7.4697   | -3.8263 | Down | 2.34E-36  | 1.68E-35  |
| Unigene116695 | Potri.017G145100.1 | 0.6823  | 9.6788   | -3.8264 | Down | 7.80E-19  | 3.32E-18  |
| Unigene12571  | Potri.017G134800.1 | 4.9733  | 70.6161  | -3.8277 | Down | 3.58E-228 | 2.17E-226 |
| Unigene20449  | Potri.002G136700.1 | 1.143   | 16.2349  | -3.8282 | Down | 4.81E-144 | 1.63E-142 |
| Unigene103372 | Potri.012G126400.1 | 0.4908  | 6.9795   | -3.8299 | Down | 6.00E-16  | 2.28E-15  |
| Unigene115507 | Potri.005G138100.1 | 0.6409  | 9.1142   | -3.8299 | Down | 6.00E-16  | 2.28E-15  |
| Unigene119182 | Potri.004G150300.2 | 0.6135  | 8.7244   | -3.8299 | Down | 1.27E-30  | 7.87E-30  |
| Unigene118809 | Potri.012G004000.1 | 0.376   | 5.3472   | -3.83   | Down | 6.00E-16  | 2.28E-15  |
| Unigene12803  | Potri.006G174600.1 | 2.3832  | 33.9156  | -3.831  | Down | 6.30E-127 | 1.81E-125 |
| Unigene64344  | Potri.006G263500.1 | 9.4362  | 134.3663 | -3.8318 | Down | 0         | 0         |
| Unigene26914  | Potri.017G040800.6 | 0.5748  | 8.1884   | -3.8324 | Down | 9.45E-28  | 5.38E-27  |
| Unigene10816  | Potri.010G097200.1 | 1.0527  | 14.9975  | -3.8326 | Down | 4.27E-197 | 2.18E-195 |
| Unigene103624 | Potri.018G151600.1 | 1.2171  | 17.3545  | -3.8338 | Down | 3.04E-51  | 3.04E-50  |
| Unigene119327 | Potri.004G100700.6 | 1.3573  | 19.3614  | -3.8344 | Down | 1.10E-74  | 1.67E-73  |
| Unigene32027  | Potri.005G145300.1 | 5.9058  | 84.2773  | -3.8349 | Down | 0         | 0         |
| Unigene119205 | Potri.008G025400.1 | 0.2403  | 3.4297   | -3.8352 | Down | 4.70E-13  | 1.57E-12  |
| Unigene112950 | Potri.013G047500.2 | 0.6016  | 8.588    | -3.8354 | Down | 4.70E-13  | 1.57E-12  |
| Unigene111677 | Potri.010G027900.7 | 0.6349  | 9.063    | -3.8354 | Down | 4.70E-13  | 1.57E-12  |
| Unigene109101 | Potri.012G144400.1 | 1.4075  | 20.0926  | -3.8355 | Down | 7.06E-25  | 3.68E-24  |

|               |                    |         |          |         |      |           |           |
|---------------|--------------------|---------|----------|---------|------|-----------|-----------|
| Unigene118463 | Potri.019G006600.1 | 0.336   | 4.7969   | -3.8356 | Down | 4.70E-13  | 1.57E-12  |
| Unigene118604 | Potri.002G192300.8 | 0.3236  | 4.62     | -3.8356 | Down | 4.70E-13  | 1.57E-12  |
| Unigene16135  | Potri.002G180800.5 | 9.5815  | 136.9001 | -3.8367 | Down | 1.45E-247 | 9.84E-246 |
| Unigene31803  | Potri.011G040700.1 | 2.4275  | 34.7199  | -3.8382 | Down | 0         | 0         |
| Unigene56994  | Potri.003G013200.2 | 3.9366  | 56.3017  | -3.8382 | Down | 6.13E-119 | 1.63E-117 |
| Unigene24859  | Potri.019G043600.1 | 5.0481  | 72.2125  | -3.8384 | Down | 3.08E-107 | 7.18E-106 |
| Unigene19747  | Potri.005G168600.3 | 0.8904  | 12.7378  | -3.8385 | Down | 2.17E-54  | 2.31E-53  |
| Unigene55545  | Potri.T141200.1    | 35.851  | 513.5643 | -3.8405 | Down | 0         | 0         |
| Unigene102963 | Potri.013G115700.1 | 0.8458  | 12.1193  | -3.8408 | Down | 6.59E-31  | 4.10E-30  |
| Unigene104713 | Potri.001G356800.3 | 1.3617  | 19.5185  | -3.8414 | Down | 2.95E-69  | 4.10E-68  |
| Unigene39944  | Potri.010G051400.3 | 2.6586  | 38.1332  | -3.8423 | Down | 8.21E-199 | 4.25E-197 |
| Unigene105755 | Potri.008G137900.2 | 0.2555  | 3.6699   | -3.8443 | Down | 3.79E-10  | 1.09E-09  |
| Unigene106935 | Potri.003G074300.1 | 0.2371  | 3.4055   | -3.8443 | Down | 3.79E-10  | 1.09E-09  |
| Unigene108431 | Potri.011G095200.1 | 0.5406  | 7.7653   | -3.8444 | Down | 3.79E-10  | 1.09E-09  |
| Unigene99120  | Potri.004G113800.3 | 0.5406  | 7.7653   | -3.8444 | Down | 3.79E-10  | 1.09E-09  |
| Unigene48185  | Potri.001G175600.1 | 0.7423  | 10.6627  | -3.8444 | Down | 6.27E-37  | 4.57E-36  |
| Unigene106770 | Potri.015G012500.1 | 0.5445  | 7.8219   | -3.8445 | Down | 4.03E-19  | 1.74E-18  |
| Unigene117197 | Potri.003G157300.1 | 0.3197  | 4.5926   | -3.8445 | Down | 3.79E-10  | 1.09E-09  |
| Unigene34034  | Potri.001G052300.1 | 1.3231  | 19.0065  | -3.8445 | Down | 1.53E-63  | 1.94E-62  |
| Unigene118771 | Potri.018G030500.3 | 0.4595  | 6.6013   | -3.8446 | Down | 4.03E-19  | 1.74E-18  |
| Unigene94698  | Potri.017G088900.1 | 0.5738  | 8.2431   | -3.8446 | Down | 4.03E-19  | 1.74E-18  |
| Unigene119033 | Potri.004G033900.1 | 0.607   | 8.7201   | -3.8446 | Down | 4.89E-28  | 2.80E-27  |
| Unigene103312 | Potri.009G092300.1 | 0.3032  | 4.3561   | -3.8447 | Down | 4.03E-19  | 1.74E-18  |
| Unigene118491 | Potri.007G003000.1 | 0.2503  | 3.596    | -3.8447 | Down | 3.79E-10  | 1.09E-09  |
| Unigene52124  | Potri.004G205000.1 | 0.5935  | 8.5358   | -3.8462 | Down | 1.11E-60  | 1.33E-59  |
| Unigene36881  | Potri.017G150000.1 | 37.2722 | 536.3338 | -3.847  | Down | 0         | 0         |
| Unigene46110  | Potri.009G040600.1 | 3.2434  | 46.6747  | -3.8471 | Down | 2.13E-84  | 3.71E-83  |
| Unigene43273  | Potri.010G121100.1 | 3.0896  | 44.4821  | -3.8477 | Down | 2.64E-164 | 1.07E-162 |
| Unigene42413  | Potri.003G087400.1 | 12.632  | 181.9579 | -3.8484 | Down | 0         | 0         |
| Unigene22220  | Potri.004G101400.1 | 1.642   | 23.6834  | -3.8504 | Down | 3.04E-200 | 1.59E-198 |
| Unigene97631  | Potri.012G111600.1 | 0.8624  | 12.4438  | -3.8509 | Down | 1.10E-84  | 1.93E-83  |
| Unigene49883  | Potri.001G213300.1 | 5.2692  | 76.0345  | -3.851  | Down | 0         | 0         |
| Unigene104060 | Potri.017G074400.1 | 0.2719  | 3.9248   | -3.8515 | Down | 3.10E-16  | 1.19E-15  |
| Unigene97801  | Potri.010G052800.2 | 0.2919  | 4.2135   | -3.8515 | Down | 3.10E-16  | 1.19E-15  |
| Unigene107091 | Potri.T151200.1    | 0.498   | 7.1893   | -3.8516 | Down | 5.72E-61  | 6.92E-60  |
| Unigene119467 | Potri.006G270800.1 | 0.6733  | 9.7199   | -3.8516 | Down | 4.29E-46  | 3.86E-45  |
| Unigene114496 | Potri.007G041100.6 | 0.6907  | 9.9719   | -3.8517 | Down | 3.10E-16  | 1.19E-15  |
| Unigene9018   | Potri.001G301400.1 | 0.743   | 10.7267  | -3.8517 | Down | 3.10E-16  | 1.19E-15  |
| Unigene103762 | Potri.008G123600.1 | 0.504   | 7.2768   | -3.8518 | Down | 3.10E-16  | 1.19E-15  |

|               |                     |         |          |         |      |           |           |
|---------------|---------------------|---------|----------|---------|------|-----------|-----------|
| Unigene79028  | Potri.007G097500.2  | 9.4803  | 136.9646 | -3.8527 | Down | 7.56E-183 | 3.52E-181 |
| Unigene13962  | Potri.013G150500.1  | 3.4123  | 49.3124  | -3.8531 | Down | 5.25E-174 | 2.28E-172 |
| Unigene37917  | Potri.007G131300.12 | 4.415   | 63.8043  | -3.8532 | Down | 7.94E-88  | 1.45E-86  |
| Unigene49423  | Potri.016G101600.1  | 0.4467  | 6.4569   | -3.8535 | Down | 3.24E-37  | 2.38E-36  |
| Unigene22531  | Potri.001G411000.2  | 5.4254  | 78.4626  | -3.8542 | Down | 0         | 0         |
| Unigene103764 | Potri.016G059900.2  | 0.7134  | 10.3208  | -3.8547 | Down | 2.74E-22  | 1.31E-21  |
| Unigene114966 | Potri.001G231300.1  | 0.9325  | 13.4907  | -3.8547 | Down | 2.74E-22  | 1.31E-21  |
| Unigene14122  | Potri.016G036600.1  | 15.9585 | 230.9378 | -3.8551 | Down | 0         | 0         |
| Unigene59382  | Potri.005G054200.1  | 1.4755  | 21.3643  | -3.8559 | Down | 4.07E-76  | 6.31E-75  |
| Unigene50905  | Potri.017G095900.1  | 0.7936  | 11.4951  | -3.8565 | Down | 2.52E-28  | 1.46E-27  |
| Unigene92871  | Potri.006G013900.1  | 17.9941 | 260.6544 | -3.8565 | Down | 0         | 0         |
| Unigene51211  | Potri.017G141000.3  | 1.9318  | 28.0176  | -3.8583 | Down | 2.28E-40  | 1.81E-39  |
| Unigene43190  | Potri.T128200.1     | 1.6604  | 24.0852  | -3.8585 | Down | 1.15E-207 | 6.27E-206 |
| Unigene116346 | Potri.019G103000.1  | 0.2361  | 3.4335   | -3.8622 | Down | 3.21E-07  | 7.67E-07  |
| Unigene116282 | Potri.018G064400.1  | 0.2376  | 3.4554   | -3.8622 | Down | 3.21E-07  | 7.67E-07  |
| Unigene114335 | Potri.013G031200.1  | 0.2784  | 4.0485   | -3.8622 | Down | 3.21E-07  | 7.67E-07  |
| Unigene108930 | Potri.004G232500.1  | 0.3536  | 5.1422   | -3.8622 | Down | 3.21E-07  | 7.67E-07  |
| Unigene111070 | Potri.004G116800.1  | 0.3258  | 4.738    | -3.8622 | Down | 3.21E-07  | 7.67E-07  |
| Unigene114654 | Potri.004G065500.1  | 0.2723  | 3.9599   | -3.8622 | Down | 3.21E-07  | 7.67E-07  |
| Unigene112418 | Potri.004G023800.1  | 0.3083  | 4.4835   | -3.8622 | Down | 3.21E-07  | 7.67E-07  |
| Unigene59246  | Potri.013G010400.1  | 0.5163  | 7.5087   | -3.8623 | Down | 1.88E-25  | 9.98E-25  |
| Unigene103694 | Potri.005G051700.1  | 0.2299  | 3.3436   | -3.8623 | Down | 2.42E-13  | 8.21E-13  |
| Unigene107883 | Potri.004G090400.2  | 0.3675  | 5.3448   | -3.8623 | Down | 3.21E-07  | 7.67E-07  |
| Unigene112119 | Potri.004G027300.1  | 0.6243  | 9.0795   | -3.8623 | Down | 2.42E-13  | 8.21E-13  |
| Unigene118770 | Potri.001G073600.1  | 0.307   | 4.465    | -3.8623 | Down | 2.42E-13  | 8.21E-13  |
| Unigene116068 | Potri.010G241600.1  | 0.243   | 3.5342   | -3.8624 | Down | 3.21E-07  | 7.67E-07  |
| Unigene115961 | Potri.004G165000.1  | 0.2454  | 3.5691   | -3.8624 | Down | 3.21E-07  | 7.67E-07  |
| Unigene104014 | Potri.018G136300.1  | 0.3286  | 4.7797   | -3.8625 | Down | 3.21E-07  | 7.68E-07  |
| Unigene45266  | Potri.017G134900.1  | 11.9503 | 173.8186 | -3.8625 | Down | 0         | 0         |
| Unigene114818 | Potri.011G118200.3  | 0.2693  | 3.917    | -3.8625 | Down | 3.21E-07  | 7.67E-07  |
| Unigene112148 | Potri.009G165900.1  | 0.3108  | 4.5208   | -3.8625 | Down | 3.21E-07  | 7.67E-07  |
| Unigene102221 | Potri.006G085900.1  | 0.4287  | 6.2356   | -3.8625 | Down | 2.42E-13  | 8.21E-13  |
| Unigene112858 | Potri.005G199600.5  | 0.302   | 4.3927   | -3.8625 | Down | 3.21E-07  | 7.67E-07  |
| Unigene113964 | Potri.002G254200.1  | 0.2847  | 4.1412   | -3.8625 | Down | 3.21E-07  | 7.67E-07  |
| Unigene111964 | Potri.010G069800.1  | 0.3134  | 4.5588   | -3.8626 | Down | 3.21E-07  | 7.67E-07  |
| Unigene96020  | Potri.009G095400.1  | 0.3586  | 5.2163   | -3.8626 | Down | 3.21E-07  | 7.67E-07  |
| Unigene116394 | Potri.006G026200.1  | 0.2353  | 3.4227   | -3.8626 | Down | 3.21E-07  | 7.67E-07  |
| Unigene111230 | Potri.002G056100.1  | 0.3243  | 4.7174   | -3.8626 | Down | 3.21E-07  | 7.67E-07  |
| Unigene50417  | Potri.010G068100.1  | 3.6907  | 53.7213  | -3.8635 | Down | 1.24E-142 | 4.14E-141 |

|               |                    |         |          |         |      |           |           |
|---------------|--------------------|---------|----------|---------|------|-----------|-----------|
| Unigene67608  | Potri.003G181600.1 | 5.7497  | 83.7059  | -3.8638 | Down | 1.16E-118 | 3.07E-117 |
| Unigene20097  | Potri.017G041500.1 | 2.7     | 39.3233  | -3.8644 | Down | 1.09E-82  | 1.85E-81  |
| Unigene39838  | Potri.003G086000.1 | 3.984   | 58.0384  | -3.8647 | Down | 8.25E-209 | 4.50E-207 |
| Unigene67439  | Potri.017G097900.1 | 11.8208 | 172.4436 | -3.8667 | Down | 0         | 0         |
| Unigene28136  | Potri.014G086200.1 | 3.4035  | 49.8386  | -3.8722 | Down | 9.01E-150 | 3.23E-148 |
| Unigene11121  | Potri.002G104600.1 | 3.5054  | 51.3566  | -3.8729 | Down | 0         | 0         |
| Unigene107094 | Potri.013G116100.1 | 1.0154  | 14.878   | -3.8731 | Down | 5.91E-47  | 5.42E-46  |
| Unigene118212 | Potri.013G059900.1 | 0.4483  | 6.5687   | -3.8731 | Down | 1.60E-16  | 6.22E-16  |
| Unigene238    | Potri.010G121100.1 | 2.9914  | 43.8445  | -3.8735 | Down | 4.41E-292 | 3.78E-290 |
| Unigene16579  | Potri.005G069100.1 | 4.5968  | 67.4234  | -3.8745 | Down | 1.14E-213 | 6.41E-212 |
| Unigene40686  | Potri.018G055500.1 | 7.1842  | 105.3884 | -3.8747 | Down | 1.71E-301 | 1.53E-299 |
| Unigene119390 | Potri.002G120200.1 | 0.6624  | 9.7169   | -3.8747 | Down | 6.09E-41  | 4.89E-40  |
| Unigene105555 | Potri.006G240000.1 | 0.5396  | 7.9208   | -3.8757 | Down | 9.72E-26  | 5.20E-25  |
| Unigene81519  | Potri.005G178300.3 | 18.4304 | 270.5804 | -3.8759 | Down | 0         | 0         |
| Unigene82736  | Potri.001G060100.2 | 4.2547  | 62.4933  | -3.8766 | Down | 1.09E-92  | 2.11E-91  |
| Unigene96778  | Potri.004G193100.1 | 0.7288  | 10.7065  | -3.8768 | Down | 6.35E-35  | 4.39E-34  |
| Unigene34519  | Potri.018G081700.1 | 12.3217 | 181.1679 | -3.8781 | Down | 0         | 0         |
| Unigene38306  | Potri.003G146800.1 | 1.2144  | 17.8684  | -3.8791 | Down | 4.15E-108 | 9.76E-107 |
| Unigene102737 | Potri.003G030900.1 | 0.227   | 3.342    | -3.8799 | Down | 1.95E-10  | 5.71E-10  |
| Unigene36186  | Potri.002G068700.1 | 0.3718  | 5.4737   | -3.8799 | Down | 1.07E-19  | 4.72E-19  |
| Unigene20649  | Potri.016G125100.1 | 0.8526  | 12.5531  | -3.88   | Down | 1.08E-74  | 1.63E-73  |
| Unigene118713 | Potri.015G080800.1 | 0.2351  | 3.4613   | -3.88   | Down | 1.95E-10  | 5.71E-10  |
| Unigene25995  | Potri.014G032300.1 | 0.5952  | 8.7638   | -3.8801 | Down | 1.07E-19  | 4.72E-19  |
| Unigene94590  | Potri.003G112700.1 | 0.8382  | 12.3415  | -3.8801 | Down | 1.07E-19  | 4.72E-19  |
| Unigene116205 | Potri.002G119600.1 | 0.3598  | 5.2977   | -3.8801 | Down | 1.95E-10  | 5.71E-10  |
| Unigene95602  | Potri.001G276900.1 | 1.373   | 20.2159  | -3.8801 | Down | 4.46E-38  | 3.34E-37  |
| Unigene103343 | Potri.004G090800.2 | 0.2492  | 3.6695   | -3.8802 | Down | 1.95E-10  | 5.71E-10  |
| Unigene115912 | Potri.001G214700.7 | 0.3705  | 5.4556   | -3.8802 | Down | 1.95E-10  | 5.71E-10  |
| Unigene19214  | Potri.018G030500.3 | 3.537   | 52.1368  | -3.8817 | Down | 1.08E-68  | 1.49E-67  |
| Unigene41329  | Potri.015G060400.1 | 0.6726  | 9.9145   | -3.8817 | Down | 1.08E-68  | 1.49E-67  |
| Unigene93853  | Potri.005G249700.1 | 20.6591 | 304.6514 | -3.8823 | Down | 0         | 0         |
| Unigene27544  | Potri.010G042100.6 | 4.0796  | 60.1732  | -3.8826 | Down | 8.37E-130 | 2.48E-128 |
| Unigene79273  | Potri.007G010200.7 | 18.5724 | 273.9597 | -3.8827 | Down | 0         | 0         |
| Unigene33916  | Potri.003G113600.1 | 3.2269  | 47.5985  | -3.8827 | Down | 4.10E-209 | 2.24E-207 |
| Unigene25516  | Potri.001G454500.1 | 2.1341  | 31.4884  | -3.8831 | Down | 7.75E-72  | 1.12E-70  |
| Unigene15353  | Potri.014G080700.1 | 0.4922  | 7.272    | -3.885  | Down | 2.22E-44  | 1.92E-43  |
| Unigene24877  | Potri.009G105200.1 | 0.4791  | 7.0785   | -3.885  | Down | 7.29E-23  | 3.56E-22  |
| Unigene119021 | Potri.010G120700.2 | 0.4756  | 7.0269   | -3.8851 | Down | 7.29E-23  | 3.56E-22  |
| Unigene23434  | Potri.004G049100.1 | 2.1654  | 32.0199  | -3.8863 | Down | 4.25E-124 | 1.19E-122 |

|               |                    |         |          |         |      |           |           |
|---------------|--------------------|---------|----------|---------|------|-----------|-----------|
| Unigene12427  | Potri.019G063500.2 | 6.833   | 101.1271 | -3.8875 | Down | 0         | 0         |
| Unigene1301   | Potri.016G057400.1 | 3.5346  | 52.3109  | -3.8875 | Down | 4.19E-118 | 1.11E-116 |
| Unigene6433   | Potri.019G103900.3 | 2.0524  | 30.3792  | -3.8877 | Down | 4.00E-72  | 5.81E-71  |
| Unigene46256  | Potri.006G263500.1 | 4.1245  | 61.0506  | -3.8877 | Down | 4.00E-72  | 5.81E-71  |
| Unigene106561 | Potri.014G072900.1 | 0.4168  | 6.1737   | -3.8887 | Down | 1.25E-13  | 4.29E-13  |
| Unigene115085 | Potri.013G010500.2 | 0.5291  | 7.8375   | -3.8888 | Down | 1.25E-13  | 4.29E-13  |
| Unigene14726  | Potri.006G243400.1 | 0.6031  | 8.9337   | -3.8888 | Down | 5.61E-63  | 7.03E-62  |
| Unigene67339  | Potri.017G124200.1 | 11.8497 | 175.5383 | -3.8889 | Down | 1.41E-271 | 1.09E-269 |
| Unigene106415 | Potri.014G069100.5 | 0.4375  | 6.4815   | -3.889  | Down | 1.25E-13  | 4.29E-13  |
| Unigene118662 | Potri.010G004400.2 | 0.3181  | 4.7126   | -3.889  | Down | 1.25E-13  | 4.29E-13  |
| Unigene118762 | Potri.005G083400.1 | 0.3076  | 4.5571   | -3.889  | Down | 1.25E-13  | 4.28E-13  |
| Unigene104877 | Potri.008G214300.5 | 0.2281  | 3.3795   | -3.8891 | Down | 1.25E-13  | 4.29E-13  |
| Unigene20179  | Potri.007G020800.1 | 0.9219  | 13.6752  | -3.8908 | Down | 1.62E-41  | 1.32E-40  |
| Unigene37865  | Potri.018G021900.1 | 12.0007 | 178.135  | -3.8918 | Down | 0         | 0         |
| Unigene42351  | Potri.016G001600.1 | 0.8309  | 12.3341  | -3.8918 | Down | 3.47E-29  | 2.06E-28  |
| Unigene46239  | Potri.T170700.1    | 2.7951  | 41.5351  | -3.8934 | Down | 5.54E-91  | 1.05E-89  |
| Unigene104639 | Potri.001G053400.1 | 0.4921  | 7.316    | -3.894  | Down | 8.23E-17  | 3.24E-16  |
| Unigene118200 | Potri.007G007100.1 | 0.4494  | 6.6814   | -3.8941 | Down | 8.23E-17  | 3.24E-16  |
| Unigene106115 | Potri.004G192900.1 | 0.5883  | 8.7469   | -3.8941 | Down | 8.23E-17  | 3.24E-16  |
| Unigene99935  | Potri.T167400.1    | 0.5283  | 7.8549   | -3.8942 | Down | 2.41E-32  | 1.56E-31  |
| Unigene99067  | Potri.018G001900.1 | 0.3845  | 5.7171   | -3.8942 | Down | 8.23E-17  | 3.24E-16  |
| Unigene117569 | Potri.001G255400.1 | 0.504   | 7.494    | -3.8942 | Down | 8.23E-17  | 3.24E-16  |
| Unigene19592  | Potri.013G075200.1 | 4.5598  | 67.8924  | -3.8962 | Down | 4.55E-156 | 1.72E-154 |
| Unigene32553  | Potri.T093200.1    | 1.0471  | 15.5995  | -3.897  | Down | 2.86E-91  | 5.45E-90  |
| Unigene17740  | Potri.017G084600.1 | 11.6382 | 173.3822 | -3.897  | Down | 0         | 0         |
| Unigene6226   | Potri.010G103500.1 | 0.4168  | 6.2111   | -3.8974 | Down | 5.53E-20  | 2.46E-19  |
| Unigene106530 | Potri.015G109800.2 | 0.3422  | 5.1      | -3.8976 | Down | 5.53E-20  | 2.46E-19  |
| Unigene46416  | Potri.012G058300.1 | 0.3057  | 4.5565   | -3.8977 | Down | 5.53E-20  | 2.46E-19  |
| Unigene106096 | Potri.001G216800.1 | 0.335   | 4.9931   | -3.8977 | Down | 5.53E-20  | 2.46E-19  |
| Unigene7436   | Potri.011G067500.1 | 1.5154  | 22.5943  | -3.8982 | Down | 1.49E-97  | 3.08E-96  |
| Unigene2926   | Potri.014G060500.1 | 2.4866  | 37.1043  | -3.8993 | Down | 1.49E-63  | 1.89E-62  |
| Unigene105213 | Potri.008G205200.1 | 0.5841  | 8.7203   | -3.9001 | Down | 3.76E-23  | 1.85E-22  |
| Unigene105052 | Potri.003G139400.1 | 0.7581  | 11.3259  | -3.9011 | Down | 4.19E-48  | 3.94E-47  |
| Unigene40763  | Potri.004G049100.1 | 5.8869  | 88.032   | -3.9024 | Down | 0         | 0         |
| Unigene15542  | Potri.002G018300.1 | 1.4435  | 21.5856  | -3.9024 | Down | 2.83E-79  | 4.61E-78  |
| Unigene85966  | Potri.017G096000.1 | 2.1422  | 32.0396  | -3.9027 | Down | 2.12E-54  | 2.26E-53  |
| Unigene28563  | Potri.003G205900.1 | 0.9742  | 14.5746  | -3.9031 | Down | 2.09E-110 | 5.07E-109 |
| Unigene81725  | Potri.002G180800.5 | 50.9955 | 763.048  | -3.9033 | Down | 0         | 0         |
| Unigene25984  | Potri.006G133000.6 | 3.7438  | 56.0203  | -3.9034 | Down | 1.47E-85  | 2.60E-84  |

|               |                    |          |           |         |      |           |           |
|---------------|--------------------|----------|-----------|---------|------|-----------|-----------|
| Unigene22116  | Potri.015G073600.1 | 2.2078   | 33.0746   | -3.905  | Down | 2.86E-297 | 2.50E-295 |
| Unigene25105  | Potri.001G270400.1 | 1.6043   | 24.0535   | -3.9062 | Down | 6.12E-39  | 4.68E-38  |
| Unigene43124  | Potri.004G125800.1 | 3.0798   | 46.2068   | -3.9072 | Down | 3.27E-254 | 2.31E-252 |
| Unigene43639  | Potri.018G081700.1 | 14.6629  | 220.0641  | -3.9077 | Down | 0         | 0         |
| Unigene85415  | Potri.002G079900.1 | 37.2995  | 560.09    | -3.9084 | Down | 0         | 0         |
| Unigene78330  | Potri.008G212500.1 | 143.1923 | 2152.9735 | -3.9103 | Down | 0         | 0         |
| Unigene33547  | Potri.012G116000.1 | 0.7898   | 11.8854   | -3.9116 | Down | 1.05E-98  | 2.22E-97  |
| Unigene98469  | Potri.T047900.1    | 0.2021   | 3.0476    | -3.9145 | Down | 4.24E-17  | 1.69E-16  |
| Unigene110625 | Potri.018G093700.1 | 0.3316   | 5.0008    | -3.9146 | Down | 1.65E-07  | 4.02E-07  |
| Unigene111038 | Potri.018G051100.2 | 0.3258   | 4.9135    | -3.9147 | Down | 1.65E-07  | 4.02E-07  |
| Unigene118420 | Potri.002G173300.1 | 0.3399   | 5.1261    | -3.9147 | Down | 6.43E-14  | 2.23E-13  |
| Unigene109943 | Potri.013G150500.1 | 0.8516   | 12.8446   | -3.9148 | Down | 4.24E-17  | 1.69E-16  |
| Unigene116979 | Potri.010G076700.5 | 1.2068   | 18.2015   | -3.9148 | Down | 4.49E-36  | 3.20E-35  |
| Unigene112459 | Potri.006G263500.1 | 0.307    | 4.6304    | -3.9148 | Down | 1.65E-07  | 4.02E-07  |
| Unigene110985 | Potri.005G161900.2 | 0.3272   | 4.935     | -3.9148 | Down | 1.65E-07  | 4.02E-07  |
| Unigene105099 | Potri.004G013000.1 | 1.0843   | 16.3544   | -3.9148 | Down | 6.41E-33  | 4.22E-32  |
| Unigene116002 | Potri.001G035900.1 | 0.2446   | 3.6891    | -3.9148 | Down | 1.65E-07  | 4.02E-07  |
| Unigene116223 | Potri.010G184800.5 | 0.2391   | 3.6064    | -3.9149 | Down | 1.65E-07  | 4.02E-07  |
| Unigene113592 | Potri.010G060700.1 | 0.4354   | 6.5672    | -3.9149 | Down | 1.00E-10  | 2.99E-10  |
| Unigene14951  | Potri.009G111100.6 | 0.7467   | 11.2631   | -3.9149 | Down | 2.05E-64  | 2.63E-63  |
| Unigene71842  | Potri.008G136400.1 | 0.9097   | 13.7218   | -3.9149 | Down | 4.24E-17  | 1.69E-16  |
| Unigene115937 | Potri.005G154000.1 | 0.3693   | 5.5702    | -3.9149 | Down | 1.00E-10  | 2.99E-10  |
| Unigene8605   | Potri.005G052800.1 | 1.0433   | 15.7369   | -3.9149 | Down | 2.05E-64  | 2.63E-63  |
| Unigene97563  | Potri.003G216200.1 | 0.4782   | 7.2127    | -3.9149 | Down | 1.00E-10  | 2.99E-10  |
| Unigene29924  | Potri.002G060100.1 | 0.7581   | 11.4348   | -3.9149 | Down | 1.11E-48  | 1.06E-47  |
| Unigene119038 | Potri.T111900.1    | 0.2688   | 4.0547    | -3.915  | Down | 6.43E-14  | 2.23E-13  |
| Unigene113872 | Potri.019G056500.3 | 0.2858   | 4.3111    | -3.915  | Down | 1.65E-07  | 4.02E-07  |
| Unigene102045 | Potri.018G107400.1 | 0.3406   | 5.1378    | -3.915  | Down | 1.65E-07  | 4.02E-07  |
| Unigene103772 | Potri.015G132000.1 | 0.3502   | 5.2826    | -3.915  | Down | 1.65E-07  | 4.02E-07  |
| Unigene118343 | Potri.013G144800.1 | 0.2602   | 3.9251    | -3.915  | Down | 1.00E-10  | 2.99E-10  |
| Unigene109286 | Potri.013G119600.2 | 0.5253   | 7.9238    | -3.915  | Down | 1.00E-10  | 2.99E-10  |
| Unigene116315 | Potri.013G034400.1 | 0.2368   | 3.572     | -3.915  | Down | 1.65E-07  | 4.02E-07  |
| Unigene101972 | Potri.012G103900.1 | 0.2581   | 3.8934    | -3.915  | Down | 1.65E-07  | 4.02E-07  |
| Unigene110899 | Potri.012G066600.2 | 0.4929   | 7.4351    | -3.915  | Down | 1.00E-10  | 2.99E-10  |
| Unigene101819 | Potri.011G164700.1 | 0.3845   | 5.7999    | -3.915  | Down | 6.43E-14  | 2.23E-13  |
| Unigene109927 | Potri.010G176800.1 | 0.3406   | 5.1378    | -3.915  | Down | 1.65E-07  | 4.02E-07  |
| Unigene113430 | Potri.009G156400.4 | 0.4405   | 6.6448    | -3.915  | Down | 1.00E-10  | 2.99E-10  |
| Unigene101955 | Potri.002G123500.2 | 0.4144   | 6.251     | -3.915  | Down | 1.00E-10  | 2.99E-10  |
| Unigene117225 | Potri.018G060300.1 | 0.2125   | 3.2057    | -3.9151 | Down | 1.65E-07  | 4.02E-07  |

|               |                    |         |          |         |      |           |           |
|---------------|--------------------|---------|----------|---------|------|-----------|-----------|
| Unigene119258 | Potri.010G120000.2 | 0.2302  | 3.4728   | -3.9151 | Down | 6.43E-14  | 2.23E-13  |
| Unigene78401  | Potri.T016900.1    | 21.1786 | 320.1194 | -3.9179 | Down | 0         | 0         |
| Unigene9980   | Potri.009G134700.1 | 1.1841  | 17.9239  | -3.92   | Down | 7.79E-128 | 2.26E-126 |
| Unigene119272 | Potri.005G237300.5 | 0.8555  | 12.965   | -3.9217 | Down | 5.74E-49  | 5.48E-48  |
| Unigene106621 | Potri.010G241000.2 | 0.7565  | 11.4815  | -3.9238 | Down | 2.00E-74  | 3.01E-73  |
| Unigene47985  | Potri.001G231300.1 | 0.9325  | 14.1562  | -3.9242 | Down | 2.31E-36  | 1.66E-35  |
| Unigene9380   | Potri.008G204800.1 | 4.5352  | 68.9032  | -3.9253 | Down | 5.91E-157 | 2.25E-155 |
| Unigene119567 | Potri.001G189500.2 | 1.2655  | 19.226   | -3.9253 | Down | 1.25E-188 | 6.05E-187 |
| Unigene33667  | Potri.010G167600.1 | 4.0675  | 61.8162  | -3.9258 | Down | 1.12E-150 | 4.05E-149 |
| Unigene25315  | Potri.013G121400.1 | 10.9009 | 165.6932 | -3.926  | Down | 0         | 0         |
| Unigene27964  | Potri.013G160800.1 | 0.4997  | 7.602    | -3.9272 | Down | 5.32E-81  | 8.84E-80  |
| Unigene119439 | Potri.005G176100.2 | 1.1894  | 18.0936  | -3.9272 | Down | 5.32E-81  | 8.84E-80  |
| Unigene43562  | Potri.008G192100.1 | 2.5451  | 38.7196  | -3.9273 | Down | 0         | 0         |
| Unigene46496  | Potri.001G017300.3 | 9.7006  | 147.6402 | -3.9279 | Down | 3.77E-227 | 2.28E-225 |
| Unigene32792  | Potri.002G260900.3 | 5.2791  | 80.4015  | -3.9289 | Down | 0         | 0         |
| Unigene107904 | Potri.004G084000.1 | 1.2799  | 19.5016  | -3.9295 | Down | 9.97E-24  | 5.01E-23  |
| Unigene27751  | Potri.001G251900.2 | 0.7273  | 11.0817  | -3.9295 | Down | 9.97E-24  | 5.01E-23  |
| Unigene119138 | Potri.001G374200.1 | 0.441   | 6.7202   | -3.9297 | Down | 9.97E-24  | 5.01E-23  |
| Unigene36641  | Potri.003G181600.1 | 2.4758  | 37.7365  | -3.93   | Down | 9.03E-196 | 4.58E-194 |
| Unigene118927 | Potri.005G120400.2 | 0.4271  | 6.5186   | -3.9319 | Down | 1.46E-20  | 6.64E-20  |
| Unigene114790 | Potri.001G340400.2 | 0.8109  | 12.3759  | -3.9319 | Down | 1.46E-20  | 6.64E-20  |
| Unigene119265 | Potri.009G117800.1 | 0.6875  | 10.4938  | -3.932  | Down | 8.37E-40  | 6.53E-39  |
| Unigene103860 | Potri.004G091800.3 | 0.7886  | 12.0641  | -3.9353 | Down | 1.44E-65  | 1.89E-64  |
| Unigene102183 | Potri.013G133500.1 | 1.1993  | 18.3482  | -3.9354 | Down | 1.70E-33  | 1.13E-32  |
| Unigene101451 | Potri.001G320100.1 | 0.5977  | 9.1447   | -3.9354 | Down | 2.18E-17  | 8.78E-17  |
| Unigene14192  | Potri.001G047500.1 | 0.8594  | 13.1482  | -3.9354 | Down | 1.70E-33  | 1.13E-32  |
| Unigene98203  | Potri.010G102600.2 | 0.8477  | 12.9892  | -3.9376 | Down | 2.44E-30  | 1.50E-29  |
| Unigene47744  | Potri.012G090500.1 | 13.7419 | 210.6198 | -3.938  | Down | 8.10E-271 | 6.22E-269 |
| Unigene106221 | Potri.014G086300.7 | 0.4168  | 6.3982   | -3.9402 | Down | 3.30E-14  | 1.16E-13  |
| Unigene36222  | Potri.011G151400.1 | 0.7243  | 11.1192  | -3.9403 | Down | 3.30E-14  | 1.16E-13  |
| Unigene75438  | Potri.008G088300.2 | 8.7764  | 134.7386 | -3.9404 | Down | 1.12E-168 | 4.71E-167 |
| Unigene113551 | Potri.001G399600.8 | 0.5828  | 8.9475   | -3.9404 | Down | 3.30E-14  | 1.16E-13  |
| Unigene99475  | Potri.001G255400.1 | 0.3586  | 5.5061   | -3.9406 | Down | 3.30E-14  | 1.16E-13  |
| Unigene31036  | Potri.009G148200.1 | 0.6654  | 10.2355  | -3.9432 | Down | 1.46E-59  | 1.72E-58  |
| Unigene118641 | Potri.012G140300.1 | 0.5615  | 8.642    | -3.944  | Down | 5.13E-24  | 2.60E-23  |
| Unigene9851   | Potri.001G191800.1 | 0.6654  | 10.2466  | -3.9448 | Down | 2.04E-56  | 2.27E-55  |
| Unigene68190  | Potri.010G068100.1 | 3.281   | 50.6036  | -3.947  | Down | 1.96E-124 | 5.50E-123 |
| Unigene67396  | Potri.006G018700.1 | 6.4756  | 99.9049  | -3.9475 | Down | 2.91E-163 | 1.17E-161 |
| Unigene115718 | Potri.018G089700.1 | 0.3768  | 5.8181   | -3.9487 | Down | 5.15E-11  | 1.56E-10  |



|               |                    |         |           |         |      |           |           |
|---------------|--------------------|---------|-----------|---------|------|-----------|-----------|
| Unigene5792   | Potri.018G011500.1 | 2.5577  | 39.4963   | -3.9488 | Down | 2.68E-79  | 4.36E-78  |
| Unigene89698  | Potri.012G044900.7 | 10.5389 | 162.7445  | -3.9488 | Down | 0         | 0         |
| Unigene115150 | Potri.005G253500.1 | 0.3954  | 6.1059    | -3.9488 | Down | 5.15E-11  | 1.56E-10  |
| Unigene30780  | Potri.002G024300.1 | 0.8144  | 12.5762   | -3.9488 | Down | 4.03E-50  | 3.95E-49  |
| Unigene113036 | Potri.001G196700.1 | 0.4494  | 6.9396    | -3.9488 | Down | 5.15E-11  | 1.56E-10  |
| Unigene103537 | Potri.001G030000.2 | 0.8564  | 13.2242   | -3.9488 | Down | 1.26E-30  | 7.76E-30  |
| Unigene67253  | Potri.003G029400.1 | 7.148   | 110.4743  | -3.95   | Down | 8.03E-180 | 3.65E-178 |
| Unigene36289  | Potri.004G084000.1 | 2.2327  | 34.5253   | -3.9508 | Down | 1.05E-56  | 1.17E-55  |
| Unigene106521 | Potri.001G300800.2 | 0.4838  | 7.4873    | -3.952  | Down | 3.15E-37  | 2.31E-36  |
| Unigene90586  | Potri.019G057500.4 | 77.5869 | 1202.7525 | -3.9544 | Down | 0         | 0         |
| Unigene4913   | Potri.009G134700.1 | 0.5921  | 9.1852    | -3.9554 | Down | 1.12E-17  | 4.57E-17  |
| Unigene12405  | Potri.002G121900.1 | 0.9594  | 14.8834   | -3.9554 | Down | 5.11E-83  | 8.71E-82  |
| Unigene113113 | Potri.018G055400.1 | 0.746   | 11.5733   | -3.9555 | Down | 1.12E-17  | 4.57E-17  |
| Unigene30841  | Potri.016G047500.5 | 2.1728  | 33.7199   | -3.956  | Down | 1.95E-138 | 6.29E-137 |
| Unigene45611  | Potri.014G002500.1 | 0.6435  | 9.9885    | -3.9563 | Down | 1.36E-89  | 2.54E-88  |
| Unigene11878  | Potri.001G263900.2 | 3.5049  | 54.4039   | -3.9563 | Down | 1.93E-265 | 1.44E-263 |
| Unigene119415 | Potri.010G153600.1 | 0.5874  | 9.1234    | -3.9572 | Down | 1.14E-40  | 9.08E-40  |
| Unigene49273  | Potri.016G125600.2 | 2.7629  | 42.9758   | -3.9593 | Down | 3.62E-106 | 8.32E-105 |
| Unigene72183  | Potri.019G131100.5 | 71.3399 | 1110.1651 | -3.9599 | Down | 0         | 0         |
| Unigene106771 | Potri.011G121200.2 | 0.334   | 5.2061    | -3.9623 | Down | 1.07E-50  | 1.06E-49  |
| Unigene10397  | Potri.019G063500.2 | 11.955  | 186.5006  | -3.9635 | Down | 1.75E-247 | 1.19E-245 |
| Unigene117840 | Potri.003G128400.1 | 0.1928  | 3.0113    | -3.9652 | Down | 8.45E-08  | 2.10E-07  |
| Unigene115191 | Potri.002G187600.1 | 0.2627  | 4.1034    | -3.9653 | Down | 8.45E-08  | 2.10E-07  |
| Unigene100980 | Potri.006G031500.1 | 0.2175  | 3.3976    | -3.9654 | Down | 8.45E-08  | 2.10E-07  |
| Unigene91097  | Potri.017G131800.1 | 10.2895 | 160.7408  | -3.9655 | Down | 0         | 0         |
| Unigene118531 | Potri.013G003400.1 | 0.3308  | 5.1679    | -3.9655 | Down | 1.70E-14  | 6.05E-14  |
| Unigene16656  | Potri.007G002100.1 | 1.097   | 17.1378   | -3.9655 | Down | 9.32E-28  | 5.30E-27  |
| Unigene95097  | Potri.005G045500.1 | 0.2391  | 3.7352    | -3.9655 | Down | 8.45E-08  | 2.10E-07  |
| Unigene63432  | Potri.001G253300.2 | 2.3042  | 35.996    | -3.9655 | Down | 3.90E-54  | 4.14E-53  |
| Unigene78111  | Potri.001G081900.1 | 0.6349  | 9.9181    | -3.9655 | Down | 1.70E-14  | 6.04E-14  |
| Unigene99792  | Potri.018G009400.5 | 0.4507  | 7.0415    | -3.9656 | Down | 1.70E-14  | 6.04E-14  |
| Unigene99255  | Potri.014G144900.1 | 0.333   | 5.2025    | -3.9656 | Down | 8.45E-08  | 2.10E-07  |
| Unigene103004 | Potri.014G110600.1 | 0.4595  | 7.1789    | -3.9656 | Down | 3.87E-21  | 1.79E-20  |
| Unigene94568  | Potri.014G086300.4 | 0.2664  | 4.162     | -3.9656 | Down | 8.45E-08  | 2.10E-07  |
| Unigene113941 | Potri.008G086900.1 | 0.2847  | 4.448     | -3.9656 | Down | 8.45E-08  | 2.10E-07  |
| Unigene6023   | Potri.005G224500.1 | 0.6907  | 10.7905   | -3.9656 | Down | 1.70E-14  | 6.05E-14  |
| Unigene103168 | Potri.003G157300.1 | 0.3406  | 5.3213    | -3.9656 | Down | 1.70E-14  | 6.05E-14  |
| Unigene112072 | Potri.001G100300.1 | 0.3121  | 4.876     | -3.9656 | Down | 8.45E-08  | 2.10E-07  |
| Unigene103608 | Potri.T044300.1    | 0.2125  | 3.3201    | -3.9657 | Down | 8.45E-08  | 2.10E-07  |

|               |                    |         |          |         |      |           |           |
|---------------|--------------------|---------|----------|---------|------|-----------|-----------|
| Unigene117223 | Potri.016G113100.1 | 0.2125  | 3.3201   | -3.9657 | Down | 8.45E-08  | 2.10E-07  |
| Unigene108612 | Potri.015G033900.1 | 0.3586  | 5.6027   | -3.9657 | Down | 8.45E-08  | 2.10E-07  |
| Unigene115303 | Potri.007G129900.1 | 0.2608  | 4.0747   | -3.9657 | Down | 8.45E-08  | 2.10E-07  |
| Unigene49513  | Potri.007G057200.5 | 4.2298  | 66.1468  | -3.967  | Down | 3.56E-110 | 8.63E-109 |
| Unigene61567  | Potri.007G117000.1 | 4.9126  | 76.842   | -3.9673 | Down | 1.85E-90  | 3.49E-89  |
| Unigene105584 | Potri.009G004800.1 | 1.3726  | 21.475   | -3.9677 | Down | 2.62E-77  | 4.13E-76  |
| Unigene35864  | Potri.001G366100.1 | 15.9999 | 250.4098 | -3.9682 | Down | 0         | 0         |
| Unigene42129  | Potri.013G005300.1 | 6.1105  | 95.6627  | -3.9686 | Down | 0         | 0         |
| Unigene79690  | Potri.006G013900.1 | 1.9954  | 31.2552  | -3.9693 | Down | 2.13E-44  | 1.84E-43  |
| Unigene21024  | Potri.004G035700.1 | 8.4251  | 132.1001 | -3.9708 | Down | 0         | 0         |
| Unigene44135  | Potri.010G125800.1 | 2.5829  | 40.5126  | -3.9713 | Down | 6.82E-114 | 1.72E-112 |
| Unigene97019  | Potri.001G382500.1 | 0.4926  | 7.7338   | -3.9727 | Down | 1.35E-24  | 6.99E-24  |
| Unigene93813  | Potri.006G221800.3 | 13.3911 | 210.4615 | -3.9742 | Down | 0         | 0         |
| Unigene119029 | Potri.004G017700.1 | 0.3379  | 5.3143   | -3.9752 | Down | 5.75E-18  | 2.37E-17  |
| Unigene100597 | Potri.014G060200.1 | 0.8326  | 13.0961  | -3.9754 | Down | 5.75E-18  | 2.37E-17  |
| Unigene103121 | Potri.T105600.1    | 0.6636  | 10.4559  | -3.9779 | Down | 2.55E-81  | 4.26E-80  |
| Unigene29931  | Potri.008G192100.1 | 2.1051  | 33.1687  | -3.9779 | Down | 6.71E-108 | 1.57E-106 |
| Unigene43035  | Potri.017G032900.1 | 8.0846  | 127.4841 | -3.979  | Down | 0         | 0         |
| Unigene106883 | Potri.011G039700.1 | 0.926   | 14.6055  | -3.9794 | Down | 9.45E-85  | 1.66E-83  |
| Unigene117878 | Potri.011G091900.4 | 1.339   | 21.123   | -3.9796 | Down | 3.98E-48  | 3.74E-47  |
| Unigene44799  | Potri.002G212800.1 | 7.2726  | 114.7979 | -3.9805 | Down | 0         | 0         |
| Unigene104995 | Potri.018G126000.1 | 0.9947  | 15.7169  | -3.9819 | Down | 1.55E-41  | 1.26E-40  |
| Unigene117645 | Potri.011G047600.1 | 0.8976  | 14.183   | -3.9819 | Down | 1.70E-31  | 1.08E-30  |
| Unigene106910 | Potri.008G067500.5 | 0.2312  | 3.6532   | -3.9819 | Down | 2.64E-11  | 8.10E-11  |
| Unigene117132 | Potri.005G141900.1 | 0.3225  | 5.0955   | -3.9819 | Down | 2.64E-11  | 8.10E-11  |
| Unigene117954 | Potri.004G053000.3 | 0.2833  | 4.4763   | -3.9819 | Down | 2.64E-11  | 8.10E-11  |
| Unigene52068  | Potri.014G050600.1 | 0.2716  | 4.2916   | -3.982  | Down | 2.64E-11  | 8.10E-11  |
| Unigene116391 | Potri.008G141100.1 | 0.353   | 5.5778   | -3.982  | Down | 2.64E-11  | 8.10E-11  |
| Unigene118723 | Potri.008G086400.2 | 0.2336  | 3.6913   | -3.982  | Down | 2.64E-11  | 8.10E-11  |
| Unigene117240 | Potri.003G040800.2 | 0.3179  | 5.0232   | -3.982  | Down | 2.64E-11  | 8.10E-11  |
| Unigene116258 | Potri.001G369400.1 | 0.715   | 11.2981  | -3.982  | Down | 1.99E-21  | 9.26E-21  |
| Unigene102886 | Potri.009G085400.6 | 0.2164  | 3.42     | -3.9822 | Down | 2.64E-11  | 8.11E-11  |
| Unigene118328 | Potri.003G003800.1 | 0.2614  | 4.1312   | -3.9822 | Down | 2.64E-11  | 8.10E-11  |
| Unigene47508  | Potri.001G365300.1 | 0.2251  | 3.5576   | -3.9823 | Down | 1.99E-21  | 9.26E-21  |
| Unigene100487 | Potri.001G340600.1 | 0.655   | 10.362   | -3.9837 | Down | 5.09E-65  | 6.61E-64  |
| Unigene74641  | Potri.006G103200.1 | 1.7189  | 27.2222  | -3.9852 | Down | 6.11E-35  | 4.22E-34  |
| Unigene105495 | Potri.014G026700.1 | 1.33    | 21.1021  | -3.9879 | Down | 2.54E-75  | 3.89E-74  |
| Unigene117256 | Potri.010G154300.1 | 0.4239  | 6.7356   | -3.99   | Down | 8.70E-15  | 3.14E-14  |
| Unigene21810  | Potri.007G078100.1 | 6.9626  | 110.6433 | -3.9901 | Down | 0         | 0         |

|               |                    |        |          |         |      |           |           |
|---------------|--------------------|--------|----------|---------|------|-----------|-----------|
| Unigene83946  | Potri.002G144200.3 | 2.1781 | 34.6121  | -3.9901 | Down | 2.72E-55  | 2.96E-54  |
| Unigene106525 | Potri.001G031500.1 | 0.3916 | 6.2229   | -3.9901 | Down | 8.70E-15  | 3.14E-14  |
| Unigene15941  | Potri.013G010400.1 | 1.4772 | 23.4745  | -3.9902 | Down | 7.95E-42  | 6.51E-41  |
| Unigene2184   | Potri.003G193200.1 | 1.4793 | 23.5078  | -3.9902 | Down | 1.27E-95  | 2.56E-94  |
| Unigene105197 | Potri.005G144000.1 | 0.3586 | 5.6993   | -3.9903 | Down | 8.70E-15  | 3.14E-14  |
| Unigene40654  | Potri.009G113300.1 | 1.0551 | 16.7828  | -3.9915 | Down | 9.97E-59  | 1.16E-57  |
| Unigene105398 | Potri.015G037400.1 | 0.4315 | 6.8697   | -3.9928 | Down | 8.75E-32  | 5.58E-31  |
| Unigene15868  | Potri.017G019900.1 | 1.3369 | 21.3169  | -3.995  | Down | 3.14E-35  | 2.19E-34  |
| Unigene46969  | Potri.014G024700.1 | 0.8715 | 13.8958  | -3.995  | Down | 2.95E-18  | 1.23E-17  |
| Unigene6969   | Potri.014G020900.1 | 0.9803 | 15.6305  | -3.995  | Down | 4.94E-69  | 6.84E-68  |
| Unigene105079 | Potri.003G088300.7 | 0.7314 | 11.6616  | -3.995  | Down | 2.95E-18  | 1.23E-17  |
| Unigene105866 | Potri.008G138400.3 | 0.5485 | 8.7462   | -3.9951 | Down | 2.95E-18  | 1.23E-17  |
| Unigene118971 | Potri.012G022600.2 | 0.3479 | 5.548    | -3.9952 | Down | 2.95E-18  | 1.23E-17  |
| Unigene10993  | Potri.008G086500.1 | 3.929  | 62.6765  | -3.9957 | Down | 0         | 0         |
| Unigene34118  | Potri.007G029200.1 | 2.4135 | 38.5305  | -3.9968 | Down | 6.71E-76  | 1.04E-74  |
| Unigene49132  | Potri.009G137200.2 | 2.6    | 41.5319  | -3.9976 | Down | 2.45E-177 | 1.09E-175 |
| Unigene54448  | Potri.016G092900.1 | 2.4151 | 38.5951  | -3.9983 | Down | 1.88E-62  | 2.33E-61  |
| Unigene36515  | Potri.005G111700.1 | 1.0759 | 17.1946  | -3.9983 | Down | 1.02E-21  | 4.80E-21  |
| Unigene2031   | Potri.001G301400.1 | 1.8399 | 29.4631  | -4.0012 | Down | 3.45E-76  | 5.34E-75  |
| Unigene85430  | Potri.017G124200.1 | 18.069 | 289.3613 | -4.0013 | Down | 0         | 0         |
| Unigene9566   | Potri.007G094500.2 | 3.8543 | 61.7513  | -4.0019 | Down | 8.77E-107 | 2.03E-105 |
| Unigene102083 | Potri.009G064800.1 | 0.569  | 9.1268   | -4.0036 | Down | 4.49E-32  | 2.89E-31  |
| Unigene112365 | Potri.005G119900.1 | 1.3872 | 22.2513  | -4.0036 | Down | 4.49E-32  | 2.89E-31  |
| Unigene94623  | Potri.018G077100.1 | 1.0361 | 16.6198  | -4.0037 | Down | 4.49E-32  | 2.89E-31  |
| Unigene116653 | Potri.018G053000.1 | 2.1673 | 34.778   | -4.0042 | Down | 3.54E-66  | 4.69E-65  |
| Unigene79328  | Potri.017G076800.1 | 8.9396 | 143.9693 | -4.0094 | Down | 1.23E-199 | 6.39E-198 |
| Unigene111908 | Potri.016G092600.1 | 0.3148 | 5.0867   | -4.0142 | Down | 4.32E-08  | 1.10E-07  |
| Unigene115271 | Potri.007G133700.2 | 0.3913 | 6.3228   | -4.0142 | Down | 1.35E-11  | 4.21E-11  |
| Unigene99129  | Potri.005G185400.5 | 0.2713 | 4.3838   | -4.0142 | Down | 4.32E-08  | 1.10E-07  |
| Unigene36653  | Potri.001G240000.2 | 0.227  | 3.668    | -4.0142 | Down | 1.35E-11  | 4.21E-11  |
| Unigene100830 | Potri.016G132600.1 | 0.7314 | 11.8192  | -4.0143 | Down | 1.83E-25  | 9.71E-25  |
| Unigene99953  | Potri.016G027100.1 | 0.404  | 6.5283   | -4.0143 | Down | 1.35E-11  | 4.21E-11  |
| Unigene111687 | Potri.010G126300.1 | 1.1111 | 17.9551  | -4.0143 | Down | 1.83E-25  | 9.71E-25  |
| Unigene118287 | Potri.002G185700.1 | 0.7038 | 11.3732  | -4.0143 | Down | 6.47E-29  | 3.81E-28  |
| Unigene103076 | Potri.001G406000.1 | 0.3391 | 5.4798   | -4.0143 | Down | 4.32E-08  | 1.10E-07  |
| Unigene22982  | Potri.017G096200.1 | 2.7602 | 44.6056  | -4.0144 | Down | 1.61E-128 | 4.71E-127 |
| Unigene117751 | Potri.014G194500.1 | 0.1958 | 3.1642   | -4.0144 | Down | 4.32E-08  | 1.10E-07  |
| Unigene113763 | Potri.013G150500.1 | 2.5922 | 41.8919  | -4.0144 | Down | 2.54E-63  | 3.20E-62  |
| Unigene35544  | Potri.013G134500.1 | 0.9325 | 15.0695  | -4.0144 | Down | 1.16E-145 | 3.99E-144 |

|               |                    |         |          |         |      |           |           |
|---------------|--------------------|---------|----------|---------|------|-----------|-----------|
| Unigene99666  | Potri.008G029700.4 | 0.6515  | 10.5289  | -4.0144 | Down | 6.47E-29  | 3.81E-28  |
| Unigene116719 | Potri.005G227600.1 | 0.4535  | 7.3286   | -4.0144 | Down | 4.46E-15  | 1.63E-14  |
| Unigene96303  | Potri.005G093300.1 | 0.5869  | 9.4843   | -4.0144 | Down | 2.30E-32  | 1.49E-31  |
| Unigene34438  | Potri.004G056000.1 | 2.8737  | 46.4404  | -4.0144 | Down | 1.17E-169 | 4.92E-168 |
| Unigene107376 | Potri.003G121700.2 | 0.1865  | 3.0139   | -4.0144 | Down | 1.55E-04  | 2.90E-04  |
| Unigene100866 | Potri.002G067600.1 | 0.1865  | 3.0139   | -4.0144 | Down | 1.55E-04  | 2.90E-04  |
| Unigene100289 | Potri.001G395900.1 | 0.2937  | 4.7463   | -4.0144 | Down | 4.32E-08  | 1.10E-07  |
| Unigene118612 | Potri.001G316900.1 | 0.2422  | 3.9141   | -4.0144 | Down | 1.35E-11  | 4.21E-11  |
| Unigene25230  | Potri.T171900.2    | 1.0772  | 17.4088  | -4.0145 | Down | 6.47E-29  | 3.81E-28  |
| Unigene114374 | Potri.T148900.1    | 0.4175  | 6.7475   | -4.0145 | Down | 1.35E-11  | 4.21E-11  |
| Unigene108797 | Potri.017G134900.1 | 0.3552  | 5.7407   | -4.0145 | Down | 4.32E-08  | 1.10E-07  |
| Unigene116739 | Potri.016G094700.5 | 0.5651  | 9.133    | -4.0145 | Down | 1.51E-18  | 6.37E-18  |
| Unigene105412 | Potri.013G095400.2 | 0.2368  | 3.8272   | -4.0145 | Down | 4.32E-08  | 1.10E-07  |
| Unigene98232  | Potri.006G184700.2 | 0.247   | 3.9919   | -4.0145 | Down | 4.32E-08  | 1.10E-07  |
| Unigene4645   | Potri.005G221600.1 | 0.4472  | 7.2276   | -4.0145 | Down | 1.51E-18  | 6.37E-18  |
| Unigene26507  | Potri.016G105900.4 | 0.2925  | 4.7277   | -4.0146 | Down | 4.32E-08  | 1.10E-07  |
| Unigene111316 | Potri.016G047800.1 | 0.3229  | 5.2189   | -4.0146 | Down | 4.32E-08  | 1.10E-07  |
| Unigene117866 | Potri.014G057700.1 | 0.3835  | 6.1982   | -4.0146 | Down | 4.46E-15  | 1.63E-14  |
| Unigene115438 | Potri.012G065600.5 | 0.2581  | 4.1715   | -4.0146 | Down | 4.32E-08  | 1.10E-07  |
| Unigene117039 | Potri.006G179400.1 | 0.2181  | 3.525    | -4.0146 | Down | 4.32E-08  | 1.10E-07  |
| Unigene96071  | Potri.004G233800.3 | 0.2954  | 4.7745   | -4.0146 | Down | 4.46E-15  | 1.63E-14  |
| Unigene102836 | Potri.004G223600.3 | 0.2503  | 4.0455   | -4.0146 | Down | 4.32E-08  | 1.10E-07  |
| Unigene118214 | Potri.004G200900.1 | 0.2683  | 4.3365   | -4.0146 | Down | 1.35E-11  | 4.21E-11  |
| Unigene115851 | Potri.001G079000.9 | 0.2478  | 4.0052   | -4.0146 | Down | 4.32E-08  | 1.10E-07  |
| Unigene118639 | Potri.016G036000.4 | 0.2406  | 3.8889   | -4.0147 | Down | 1.35E-11  | 4.21E-11  |
| Unigene11530  | Potri.015G024000.1 | 4.2353  | 68.5482  | -4.0166 | Down | 6.00E-304 | 5.40E-302 |
| Unigene7210   | Potri.010G062700.1 | 1.1079  | 17.9485  | -4.018  | Down | 1.65E-94  | 3.29E-93  |
| Unigene39999  | Potri.001G087100.2 | 1.4236  | 23.0681  | -4.0183 | Down | 1.21E-87  | 2.19E-86  |
| Unigene44212  | Potri.001G399600.8 | 4.9473  | 80.1907  | -4.0187 | Down | 6.00E-308 | 5.48E-306 |
| Unigene19181  | Potri.001G052300.1 | 1.6874  | 27.3642  | -4.0194 | Down | 4.79E-67  | 6.44E-66  |
| Unigene26871  | Potri.014G020700.1 | 14.2149 | 230.6789 | -4.0204 | Down | 0         | 0         |
| Unigene33432  | Potri.006G037800.1 | 2.2744  | 36.9181  | -4.0208 | Down | 8.12E-157 | 3.09E-155 |
| Unigene29649  | Potri.002G233100.1 | 0.7936  | 12.884   | -4.021  | Down | 1.17E-101 | 2.55E-100 |
| Unigene5726   | Potri.012G128100.1 | 24.6788 | 400.7262 | -4.0213 | Down | 0         | 0         |
| Unigene75484  | Potri.005G130400.2 | 4.7257  | 76.7337  | -4.0213 | Down | 3.14E-98  | 6.58E-97  |
| Unigene45538  | Potri.017G141000.2 | 1.1158  | 18.1463  | -4.0235 | Down | 3.33E-74  | 4.99E-73  |
| Unigene118692 | Potri.014G026900.1 | 0.7886  | 12.8287  | -4.0239 | Down | 4.24E-36  | 3.02E-35  |
| Unigene35837  | Potri.004G186200.1 | 1.5986  | 26.0247  | -4.025  | Down | 1.18E-32  | 7.73E-32  |
| Unigene41092  | Potri.004G027300.1 | 1.3401  | 21.8171  | -4.025  | Down | 3.00E-126 | 8.59E-125 |

|               |                    |         |          |         |      |           |           |
|---------------|--------------------|---------|----------|---------|------|-----------|-----------|
| Unigene89422  | Potri.T094400.2    | 38.5604 | 627.7948 | -4.0251 | Down | 0         | 0         |
| Unigene105654 | Potri.009G149600.2 | 0.6368  | 10.3893  | -4.0281 | Down | 9.38E-26  | 5.02E-25  |
| Unigene41070  | Potri.005G120500.1 | 5.7398  | 93.6667  | -4.0285 | Down | 0         | 0         |
| Unigene48223  | Potri.014G058400.1 | 0.4183  | 6.8352   | -4.0304 | Down | 2.68E-22  | 1.28E-21  |
| Unigene104119 | Potri.001G379300.1 | 0.3281  | 5.362    | -4.0306 | Down | 2.68E-22  | 1.28E-21  |
| Unigene5524   | Potri.001G067000.1 | 12.5852 | 205.8386 | -4.0317 | Down | 0         | 0         |
| Unigene92348  | Potri.015G144800.1 | 15.8721 | 259.7503 | -4.0326 | Down | 0         | 0         |
| Unigene28814  | Potri.010G042100.3 | 3.9644  | 64.8831  | -4.0327 | Down | 0         | 0         |
| Unigene116870 | Potri.018G087100.1 | 0.5551  | 9.0895   | -4.0334 | Down | 7.75E-19  | 3.30E-18  |
| Unigene117646 | Potri.014G092400.1 | 0.4987  | 8.166    | -4.0334 | Down | 7.75E-19  | 3.30E-18  |
| Unigene97550  | Potri.003G028500.2 | 0.2937  | 4.8096   | -4.0335 | Down | 7.75E-19  | 3.30E-18  |
| Unigene97865  | Potri.001G121700.2 | 0.315   | 5.1589   | -4.0336 | Down | 7.75E-19  | 3.30E-18  |
| Unigene25852  | Potri.017G007600.1 | 0.9706  | 15.9098  | -4.0349 | Down | 1.91E-50  | 1.89E-49  |
| Unigene96918  | Potri.004G038300.2 | 0.807   | 13.2341  | -4.0355 | Down | 6.06E-33  | 3.99E-32  |
| Unigene119493 | Potri.005G112700.1 | 0.8627  | 14.1622  | -4.037  | Down | 4.49E-75  | 6.84E-74  |
| Unigene63238  | Potri.010G155500.1 | 1.7034  | 27.9714  | -4.0375 | Down | 4.14E-103 | 9.19E-102 |
| Unigene58850  | Potri.T123700.1    | 0.6376  | 10.4756  | -4.0382 | Down | 2.28E-15  | 8.45E-15  |
| Unigene34768  | Potri.019G034700.1 | 1.3539  | 22.2441  | -4.0382 | Down | 1.22E-71  | 1.76E-70  |
| Unigene54550  | Potri.001G162600.1 | 0.7386  | 12.1351  | -4.0382 | Down | 2.28E-15  | 8.45E-15  |
| Unigene16092  | Potri.001G087100.2 | 1.015   | 16.6755  | -4.0382 | Down | 1.70E-29  | 1.02E-28  |
| Unigene49243  | Potri.003G101800.1 | 2.6807  | 44.0634  | -4.0389 | Down | 2.87E-124 | 8.04E-123 |
| Unigene38112  | Potri.019G043600.1 | 1.6124  | 26.5199  | -4.0398 | Down | 3.58E-54  | 3.80E-53  |
| Unigene13992  | Potri.013G110000.1 | 1.1334  | 18.6495  | -4.0404 | Down | 4.01E-40  | 3.15E-39  |
| Unigene99595  | Potri.017G110800.3 | 0.8533  | 14.0517  | -4.0415 | Down | 4.80E-26  | 2.59E-25  |
| Unigene117833 | Potri.001G085100.1 | 2.6987  | 44.4426  | -4.0416 | Down | 5.72E-100 | 1.23E-98  |
| Unigene115791 | Potri.009G117300.2 | 0.8732  | 14.3807  | -4.0417 | Down | 4.80E-26  | 2.59E-25  |
| Unigene35483  | Potri.002G070100.2 | 1.6878  | 27.8205  | -4.0429 | Down | 1.11E-36  | 8.06E-36  |
| Unigene118050 | Potri.001G176600.1 | 0.2777  | 4.5869   | -4.0459 | Down | 6.92E-12  | 2.18E-11  |
| Unigene116182 | Potri.T065400.1    | 0.361   | 5.963    | -4.046  | Down | 6.92E-12  | 2.18E-11  |
| Unigene117040 | Potri.016G031900.1 | 0.3272  | 5.405    | -4.046  | Down | 6.92E-12  | 2.18E-11  |
| Unigene108886 | Potri.008G074300.3 | 0.5329  | 8.8025   | -4.046  | Down | 6.92E-12  | 2.18E-11  |
| Unigene116030 | Potri.005G095300.8 | 0.3657  | 6.0409   | -4.046  | Down | 6.92E-12  | 2.18E-11  |
| Unigene102353 | Potri.001G003700.1 | 0.2703  | 4.465    | -4.046  | Down | 6.92E-12  | 2.18E-11  |
| Unigene106300 | Potri.014G024300.1 | 0.3968  | 6.555    | -4.0461 | Down | 3.10E-33  | 2.06E-32  |
| Unigene119434 | Potri.013G069200.2 | 0.3826  | 6.3369   | -4.0499 | Down | 8.71E-30  | 5.25E-29  |
| Unigene94767  | Potri.017G096000.1 | 1.0564  | 17.5099  | -4.0509 | Down | 1.38E-47  | 1.28E-46  |
| Unigene979    | Potri.019G055800.1 | 2.1007  | 34.8309  | -4.0514 | Down | 7.13E-147 | 2.49E-145 |
| Unigene38844  | Potri.014G196600.2 | 0.6298  | 10.4421  | -4.0514 | Down | 2.37E-65  | 3.09E-64  |
| Unigene8813   | Potri.002G212900.1 | 6.8038  | 112.8327 | -4.0517 | Down | 0         | 0         |

|               |                    |         |          |         |      |           |           |
|---------------|--------------------|---------|----------|---------|------|-----------|-----------|
| Unigene118647 | Potri.018G066800.1 | 0.4002  | 6.64     | -4.0524 | Down | 3.96E-19  | 1.71E-18  |
| Unigene112723 | Potri.015G092200.1 | 0.7581  | 12.5783  | -4.0524 | Down | 3.96E-19  | 1.71E-18  |
| Unigene111923 | Potri.005G067300.1 | 0.7869  | 13.056   | -4.0524 | Down | 3.96E-19  | 1.71E-18  |
| Unigene52719  | Potri.001G378700.2 | 2.8592  | 47.4661  | -4.0532 | Down | 1.14E-79  | 1.87E-78  |
| Unigene52352  | Potri.006G045500.2 | 1.0173  | 16.8961  | -4.0539 | Down | 3.81E-44  | 3.27E-43  |
| Unigene1721   | Potri.006G171400.1 | 4.2493  | 70.6208  | -4.0548 | Down | 0         | 0         |
| Unigene41542  | Potri.010G152000.1 | 0.3652  | 6.0699   | -4.0549 | Down | 2.46E-26  | 1.34E-25  |
| Unigene37953  | Potri.014G094800.1 | 5.0349  | 83.6915  | -4.055  | Down | 9.51E-176 | 4.18E-174 |
| Unigene50859  | Potri.015G108800.1 | 1.3815  | 22.9779  | -4.0559 | Down | 2.51E-204 | 1.33E-202 |
| Unigene100678 | Potri.016G018400.1 | 0.7023  | 11.6857  | -4.0565 | Down | 1.59E-33  | 1.06E-32  |
| Unigene117164 | Potri.006G090000.3 | 0.9646  | 16.051   | -4.0566 | Down | 1.59E-33  | 1.06E-32  |
| Unigene16782  | Potri.008G146100.4 | 0.4371  | 7.2836   | -4.0586 | Down | 4.81E-55  | 5.21E-54  |
| Unigene54395  | Potri.007G080600.7 | 17.8105 | 297.0691 | -4.06   | Down | 0         | 0         |
| Unigene115531 | Potri.011G045100.2 | 0.2564  | 4.2809   | -4.0614 | Down | 2.21E-08  | 5.71E-08  |
| Unigene116836 | Potri.003G119700.7 | 0.2234  | 3.7298   | -4.0614 | Down | 2.21E-08  | 5.71E-08  |
| Unigene110584 | Potri.008G029200.1 | 0.3316  | 5.5366   | -4.0615 | Down | 2.21E-08  | 5.71E-08  |
| Unigene94743  | Potri.018G139500.3 | 0.5921  | 9.8868   | -4.0616 | Down | 7.02E-23  | 3.43E-22  |
| Unigene107871 | Potri.016G092700.2 | 0.3675  | 6.1367   | -4.0616 | Down | 2.21E-08  | 5.71E-08  |
| Unigene106240 | Potri.015G069000.2 | 0.353   | 5.8947   | -4.0617 | Down | 7.02E-23  | 3.43E-22  |
| Unigene114161 | Potri.012G130100.1 | 0.2815  | 4.7009   | -4.0617 | Down | 2.21E-08  | 5.71E-08  |
| Unigene117326 | Potri.004G049100.1 | 0.4191  | 6.9985   | -4.0617 | Down | 1.17E-15  | 4.37E-15  |
| Unigene115125 | Potri.002G155900.1 | 0.2636  | 4.4019   | -4.0617 | Down | 2.21E-08  | 5.71E-08  |
| Unigene110038 | Potri.001G259100.2 | 0.3391  | 5.6625   | -4.0617 | Down | 2.21E-08  | 5.71E-08  |
| Unigene104253 | Potri.010G104200.2 | 0.448   | 7.4819   | -4.0618 | Down | 1.17E-15  | 4.37E-15  |
| Unigene110260 | Potri.005G234800.1 | 0.336   | 5.6114   | -4.0618 | Down | 2.21E-08  | 5.71E-08  |
| Unigene105156 | Potri.004G086000.2 | 0.259   | 4.3255   | -4.0618 | Down | 2.21E-08  | 5.71E-08  |
| Unigene112816 | Potri.001G343800.3 | 0.302   | 5.0435   | -4.0618 | Down | 2.21E-08  | 5.71E-08  |
| Unigene99642  | Potri.001G196500.1 | 0.3502  | 5.8486   | -4.0618 | Down | 2.21E-08  | 5.71E-08  |
| Unigene102338 | Potri.T039300.1    | 0.3174  | 5.301    | -4.0619 | Down | 2.21E-08  | 5.71E-08  |
| Unigene101154 | Potri.007G011000.5 | 0.2295  | 3.8331   | -4.0619 | Down | 2.21E-08  | 5.71E-08  |
| Unigene118852 | Potri.006G151100.2 | 0.2954  | 4.9336   | -4.0619 | Down | 1.17E-15  | 4.37E-15  |
| Unigene114195 | Potri.003G191200.1 | 0.2804  | 4.6832   | -4.0619 | Down | 2.21E-08  | 5.71E-08  |
| Unigene111627 | Potri.001G135900.2 | 0.3174  | 5.301    | -4.0619 | Down | 2.21E-08  | 5.71E-08  |
| Unigene6354   | Potri.002G054100.3 | 1.5485  | 25.8955  | -4.0638 | Down | 5.68E-84  | 9.82E-83  |
| Unigene17092  | Potri.010G089800.1 | 5.0863  | 85.0981  | -4.0644 | Down | 0         | 0         |
| Unigene15916  | Potri.017G131800.1 | 15.3069 | 256.2755 | -4.0654 | Down | 0         | 0         |
| Unigene45899  | Potri.006G151100.2 | 2.3167  | 38.8124  | -4.0664 | Down | 2.21E-73  | 3.27E-72  |
| Unigene114177 | Potri.008G062400.2 | 1.2668  | 21.2299  | -4.0668 | Down | 8.13E-34  | 5.47E-33  |
| Unigene28426  | Potri.004G049100.1 | 1.6306  | 27.3391  | -4.0675 | Down | 4.62E-59  | 5.40E-58  |

|               |                    |         |          |         |      |           |           |
|---------------|--------------------|---------|----------|---------|------|-----------|-----------|
| Unigene47427  | Potri.009G134700.1 | 1.7376  | 29.1405  | -4.0679 | Down | 1.92E-109 | 4.60E-108 |
| Unigene107563 | Potri.008G120000.1 | 1.299   | 21.792   | -4.0683 | Down | 1.26E-26  | 6.92E-26  |
| Unigene105739 | Potri.006G040800.1 | 0.5451  | 9.1444   | -4.0683 | Down | 1.26E-26  | 6.92E-26  |
| Unigene51852  | Potri.004G062000.3 | 1.6339  | 27.4104  | -4.0683 | Down | 1.83E-127 | 5.31E-126 |
| Unigene85360  | Potri.001G076600.1 | 3.7559  | 63.0684  | -4.0697 | Down | 5.17E-106 | 1.19E-104 |
| Unigene15707  | Potri.007G046700.2 | 0.6365  | 10.6978  | -4.071  | Down | 2.03E-19  | 8.84E-19  |
| Unigene22409  | Potri.008G197600.4 | 1.6429  | 27.6642  | -4.0737 | Down | 3.76E-99  | 7.98E-98  |
| Unigene100277 | Potri.001G106600.1 | 0.5291  | 8.93     | -4.077  | Down | 3.59E-23  | 1.77E-22  |
| Unigene103553 | Potri.008G002800.1 | 0.2884  | 4.8678   | -4.0771 | Down | 3.54E-12  | 1.13E-11  |
| Unigene52495  | Potri.007G082500.1 | 2.1314  | 35.9753  | -4.0771 | Down | 4.70E-132 | 1.43E-130 |
| Unigene111233 | Potri.011G141700.3 | 0.4865  | 8.2118   | -4.0772 | Down | 3.54E-12  | 1.13E-11  |
| Unigene115563 | Potri.009G126300.1 | 0.3832  | 6.4682   | -4.0772 | Down | 3.54E-12  | 1.13E-11  |
| Unigene117192 | Potri.015G038400.1 | 0.3206  | 5.4118   | -4.0773 | Down | 3.54E-12  | 1.13E-11  |
| Unigene73824  | Potri.009G146500.3 | 0.5253  | 8.8672   | -4.0773 | Down | 3.54E-12  | 1.13E-11  |
| Unigene113434 | Potri.001G296300.1 | 0.4405  | 7.4358   | -4.0773 | Down | 3.54E-12  | 1.13E-11  |
| Unigene14819  | Potri.006G218900.7 | 8.3892  | 141.6911 | -4.0781 | Down | 0         | 0         |
| Unigene89495  | Potri.007G141000.1 | 13.3735 | 226.1403 | -4.0798 | Down | 0         | 0         |
| Unigene22270  | Potri.009G104700.1 | 3.0356  | 51.3884  | -4.0814 | Down | 0         | 0         |
| Unigene20237  | Potri.015G003700.2 | 2.4555  | 41.5709  | -4.0815 | Down | 5.59E-78  | 8.88E-77  |
| Unigene17957  | Potri.018G027300.1 | 0.7864  | 13.3144  | -4.0816 | Down | 6.44E-27  | 3.57E-26  |
| Unigene105643 | Potri.003G133400.1 | 0.6407  | 10.8475  | -4.0816 | Down | 1.77E-52  | 1.82E-51  |
| Unigene18886  | Potri.013G115700.1 | 2.5701  | 43.5221  | -4.0819 | Down | 1.67E-143 | 5.62E-142 |
| Unigene27880  | Potri.006G221800.3 | 13.1081 | 222.1668 | -4.0831 | Down | 0         | 0         |
| Unigene30042  | Potri.017G107500.1 | 6.3159  | 107.075  | -4.0835 | Down | 1.09E-194 | 5.50E-193 |
| Unigene116379 | Potri.006G254900.5 | 0.4707  | 7.9863   | -4.0846 | Down | 5.96E-16  | 2.26E-15  |
| Unigene46705  | Potri.015G116700.2 | 0.9688  | 16.4394  | -4.0848 | Down | 1.17E-30  | 7.22E-30  |
| Unigene117305 | Potri.012G088900.1 | 1.2608  | 21.3944  | -4.0848 | Down | 2.61E-45  | 2.31E-44  |
| Unigene104983 | Potri.003G157900.1 | 0.2891  | 4.9063   | -4.085  | Down | 5.96E-16  | 2.26E-15  |
| Unigene48585  | Potri.004G234100.1 | 18.0067 | 305.7193 | -4.0856 | Down | 0         | 0         |
| Unigene106987 | Potri.014G089700.1 | 0.9602  | 16.3128  | -4.0865 | Down | 4.86E-49  | 4.65E-48  |
| Unigene27440  | Potri.006G186200.1 | 13.2581 | 225.2403 | -4.0865 | Down | 0         | 0         |
| Unigene54114  | Potri.001G399600.4 | 7.7868  | 132.4662 | -4.0884 | Down | 6.89E-298 | 6.06E-296 |
| Unigene51264  | Potri.016G021600.1 | 0.9474  | 16.1171  | -4.0885 | Down | 4.11E-71  | 5.88E-70  |
| Unigene105014 | Potri.010G184900.4 | 0.4516  | 7.6868   | -4.0893 | Down | 1.04E-19  | 4.56E-19  |
| Unigene26826  | Potri.001G399600.8 | 4.1962  | 71.4292  | -4.0894 | Down | 2.13E-166 | 8.77E-165 |
| Unigene93520  | Potri.001G240900.1 | 16.0035 | 272.5399 | -4.09   | Down | 0         | 0         |
| Unigene98079  | Potri.006G110000.1 | 0.9097  | 15.5038  | -4.0911 | Down | 7.21E-42  | 5.91E-41  |
| Unigene83222  | Potri.004G234100.1 | 28.3588 | 483.4265 | -4.0914 | Down | 0         | 0         |
| Unigene116972 | Potri.002G018300.1 | 1.3203  | 22.5227  | -4.0924 | Down | 1.34E-45  | 1.19E-44  |

|               |                    |         |          |         |      |           |           |
|---------------|--------------------|---------|----------|---------|------|-----------|-----------|
| Unigene107199 | Potri.012G017800.1 | 0.2933  | 5.0034   | -4.0925 | Down | 1.83E-23  | 9.14E-23  |
| Unigene33399  | Potri.T123700.1    | 3.203   | 54.6563  | -4.0929 | Down | 2.62E-229 | 1.60E-227 |
| Unigene84551  | Potri.008G039600.6 | 35.4346 | 604.6438 | -4.0929 | Down | 0         | 0         |
| Unigene4313   | Potri.001G347400.3 | 1.3854  | 23.6519  | -4.0936 | Down | 2.48E-49  | 2.39E-48  |
| Unigene97381  | Potri.001G229200.1 | 0.3125  | 5.344    | -4.096  | Down | 5.96E-31  | 3.72E-30  |
| Unigene64365  | Potri.017G084600.1 | 10.7452 | 183.7608 | -4.0961 | Down | 0         | 0         |
| Unigene93923  | Potri.017G084600.1 | 12.7618 | 218.8648 | -4.1001 | Down | 0         | 0         |
| Unigene51955  | Potri.003G193800.5 | 1.6382  | 28.1025  | -4.1005 | Down | 1.27E-49  | 1.23E-48  |
| Unigene15362  | Potri.001G399600.8 | 5.628   | 96.8963  | -4.1057 | Down | 4.91E-191 | 2.42E-189 |
| Unigene106657 | Potri.001G082900.1 | 0.1933  | 3.3314   | -4.1072 | Down | 1.12E-08  | 2.96E-08  |
| Unigene113322 | Potri.011G067400.1 | 0.2949  | 5.0827   | -4.1073 | Down | 1.12E-08  | 2.96E-08  |
| Unigene111832 | Potri.016G064300.2 | 0.3148  | 5.4259   | -4.1074 | Down | 1.12E-08  | 2.96E-08  |
| Unigene16817  | Potri.014G092500.1 | 0.2674  | 4.6091   | -4.1074 | Down | 1.12E-08  | 2.96E-08  |
| Unigene108446 | Potri.010G254200.1 | 0.1802  | 3.1061   | -4.1074 | Down | 7.86E-05  | 1.52E-04  |
| Unigene117348 | Potri.007G048800.1 | 0.7314  | 12.6071  | -4.1074 | Down | 1.68E-27  | 9.49E-27  |
| Unigene100551 | Potri.006G241700.1 | 0.361   | 6.2222   | -4.1074 | Down | 1.80E-12  | 5.86E-12  |
| Unigene114066 | Potri.004G027300.1 | 0.2826  | 4.8709   | -4.1074 | Down | 1.12E-08  | 2.96E-08  |
| Unigene47679  | Potri.001G037600.1 | 0.6243  | 10.7609  | -4.1074 | Down | 3.05E-16  | 1.17E-15  |
| Unigene16709  | Potri.019G131100.7 | 2.3072  | 39.7709  | -4.1075 | Down | 6.77E-91  | 1.28E-89  |
| Unigene91706  | Potri.016G055600.1 | 10.118  | 174.413  | -4.1075 | Down | 0         | 0         |
| Unigene106911 | Potri.011G061000.1 | 0.3089  | 5.3247   | -4.1075 | Down | 3.05E-16  | 1.17E-15  |
| Unigene99966  | Potri.008G015800.1 | 0.4191  | 7.2243   | -4.1075 | Down | 1.80E-12  | 5.86E-12  |
| Unigene103741 | Potri.002G019800.1 | 0.3475  | 5.9903   | -4.1075 | Down | 1.80E-12  | 5.86E-12  |
| Unigene117756 | Potri.001G418400.1 | 0.7832  | 13.5005  | -4.1075 | Down | 3.05E-31  | 1.92E-30  |
| Unigene100697 | Potri.001G303000.1 | 0.3118  | 5.3748   | -4.1075 | Down | 3.05E-31  | 1.92E-30  |
| Unigene112820 | Potri.010G189200.1 | 0.302   | 5.2062   | -4.1076 | Down | 1.12E-08  | 2.96E-08  |
| Unigene118676 | Potri.010G151400.1 | 0.5543  | 9.5557   | -4.1076 | Down | 1.68E-27  | 9.49E-27  |
| Unigene110909 | Potri.007G000700.1 | 0.3286  | 5.6649   | -4.1076 | Down | 1.12E-08  | 2.96E-08  |
| Unigene103059 | Potri.003G207200.3 | 0.7897  | 13.6132  | -4.1076 | Down | 6.49E-50  | 6.32E-49  |
| Unigene106745 | Potri.003G181400.2 | 0.322   | 5.5508   | -4.1076 | Down | 9.37E-24  | 4.71E-23  |
| Unigene42144  | Potri.002G254600.2 | 0.6081  | 10.4831  | -4.1076 | Down | 5.56E-35  | 3.85E-34  |
| Unigene108767 | Potri.001G378700.2 | 0.1776  | 3.0617   | -4.1076 | Down | 7.86E-05  | 1.52E-04  |
| Unigene108859 | Potri.019G079800.1 | 0.3552  | 6.1235   | -4.1077 | Down | 1.12E-08  | 2.96E-08  |
| Unigene105872 | Potri.013G091300.1 | 0.2162  | 3.7273   | -4.1077 | Down | 1.12E-08  | 2.96E-08  |
| Unigene102357 | Potri.003G157300.1 | 0.3032  | 5.2273   | -4.1077 | Down | 1.12E-08  | 2.96E-08  |
| Unigene106016 | Potri.003G093900.1 | 0.2181  | 3.76     | -4.1077 | Down | 1.12E-08  | 2.96E-08  |
| Unigene106598 | Potri.018G151000.1 | 0.1828  | 3.1518   | -4.1078 | Down | 1.12E-08  | 2.96E-08  |
| Unigene118237 | Potri.009G123900.1 | 0.178   | 3.069    | -4.1078 | Down | 1.12E-08  | 2.96E-08  |
| Unigene107889 | Potri.005G160600.1 | 0.1837  | 3.1673   | -4.1078 | Down | 7.86E-05  | 1.52E-04  |



|               |                    |         |          |         |      |           |           |
|---------------|--------------------|---------|----------|---------|------|-----------|-----------|
| Unigene90667  | Potri.012G031100.6 | 15.8762 | 274.1867 | -4.1102 | Down | 0         | 0         |
| Unigene36628  | Potri.018G148800.5 | 5.4502  | 94.316   | -4.1131 | Down | 3.00E-121 | 8.19E-120 |
| Unigene49884  | Potri.010G125300.1 | 1.9823  | 34.3448  | -4.1148 | Down | 4.68E-185 | 2.22E-183 |
| Unigene44777  | Potri.T123500.1    | 4.247   | 73.6066  | -4.1153 | Down | 6.68E-174 | 2.89E-172 |
| Unigene94726  | Potri.012G084800.5 | 0.3752  | 6.5089   | -4.1167 | Down | 5.22E-39  | 4.00E-38  |
| Unigene113458 | Potri.002G116300.1 | 1.3165  | 22.8504  | -4.1174 | Down | 2.84E-35  | 1.98E-34  |
| Unigene16178  | Potri.019G032500.2 | 0.7979  | 13.8607  | -4.1186 | Down | 1.56E-31  | 9.87E-31  |
| Unigene98042  | Potri.002G144700.1 | 0.4027  | 6.9958   | -4.1187 | Down | 1.56E-31  | 9.86E-31  |
| Unigene25926  | Potri.001G340400.2 | 1.3751  | 23.8889  | -4.1187 | Down | 1.56E-31  | 9.87E-31  |
| Unigene26650  | Potri.011G125400.1 | 1.097   | 19.0584  | -4.1188 | Down | 1.56E-31  | 9.87E-31  |
| Unigene4984   | Potri.001G060400.1 | 1.1854  | 20.6034  | -4.1194 | Down | 5.91E-58  | 6.76E-57  |
| Unigene47937  | Potri.014G020400.1 | 5.5949  | 97.3181  | -4.1205 | Down | 3.76E-261 | 2.76E-259 |
| Unigene103542 | Potri.001G240900.1 | 0.7219  | 12.5741  | -4.1225 | Down | 4.78E-24  | 2.43E-23  |
| Unigene116644 | Potri.003G193200.1 | 1.2586  | 21.9416  | -4.1238 | Down | 4.92E-43  | 4.14E-42  |
| Unigene26924  | Potri.001G201500.2 | 8.8957  | 155.1922 | -4.1248 | Down | 7.73E-217 | 4.41E-215 |
| Unigene116321 | Potri.018G011500.1 | 0.5921  | 10.3333  | -4.1253 | Down | 2.70E-20  | 1.21E-19  |
| Unigene112251 | Potri.018G126000.1 | 0.7738  | 13.5062  | -4.1255 | Down | 2.70E-20  | 1.21E-19  |
| Unigene67633  | Potri.007G010200.8 | 14.2333 | 248.4627 | -4.1257 | Down | 0         | 0         |
| Unigene28368  | Potri.008G116700.1 | 1.3778  | 24.0687  | -4.1267 | Down | 1.61E-54  | 1.73E-53  |
| Unigene91068  | Potri.T094400.2    | 15.4184 | 269.3602 | -4.1268 | Down | 0         | 0         |
| Unigene111486 | Potri.010G159900.1 | 1.4408  | 25.1804  | -4.1274 | Down | 1.45E-35  | 1.02E-34  |
| Unigene46371  | Potri.008G041100.1 | 0.9384  | 16.4279  | -4.1298 | Down | 7.95E-32  | 5.08E-31  |
| Unigene109264 | Potri.001G060400.1 | 0.7005  | 12.2631  | -4.1298 | Down | 1.55E-16  | 6.05E-16  |
| Unigene80363  | Potri.008G142400.4 | 3.008   | 52.6621  | -4.1299 | Down | 1.85E-77  | 2.92E-76  |
| Unigene102137 | Potri.017G025100.1 | 0.2799  | 4.9006   | -4.13   | Down | 1.55E-16  | 6.05E-16  |
| Unigene25404  | Potri.012G090500.1 | 5.4613  | 95.7685  | -4.1322 | Down | 3.04E-180 | 1.39E-178 |
| Unigene4231   | Potri.012G097400.1 | 1.8547  | 32.5256  | -4.1323 | Down | 5.20E-70  | 7.31E-69  |
| Unigene118282 | Potri.009G031800.1 | 0.6158  | 10.8045  | -4.133  | Down | 4.38E-28  | 2.52E-27  |
| Unigene118206 | Potri.014G172800.2 | 0.8988  | 15.7836  | -4.1343 | Down | 1.36E-39  | 1.06E-38  |
| Unigene38432  | Potri.013G159000.4 | 1.5838  | 27.814   | -4.1343 | Down | 9.43E-78  | 1.50E-76  |
| Unigene25974  | Potri.009G053800.1 | 4.5578  | 80.0698  | -4.1348 | Down | 2.90E-188 | 1.40E-186 |
| Unigene61691  | Potri.014G026700.1 | 1.909   | 33.5404  | -4.135  | Down | 4.42E-51  | 4.41E-50  |
| Unigene52453  | Potri.001G348100.1 | 1.562   | 27.4633  | -4.136  | Down | 5.96E-97  | 1.23E-95  |
| Unigene117464 | Potri.006G209600.5 | 0.3083  | 5.4244   | -4.1371 | Down | 9.19E-13  | 3.03E-12  |
| Unigene117643 | Potri.017G108600.1 | 0.2992  | 5.2649   | -4.1372 | Down | 9.19E-13  | 3.03E-12  |
| Unigene114620 | Potri.010G211400.3 | 0.4099  | 7.2127   | -4.1372 | Down | 9.19E-13  | 3.03E-12  |
| Unigene94672  | Potri.010G005000.2 | 0.5157  | 9.0741   | -4.1372 | Down | 9.19E-13  | 3.03E-12  |
| Unigene114389 | Potri.005G109400.1 | 0.416   | 7.32     | -4.1372 | Down | 9.19E-13  | 3.03E-12  |
| Unigene56437  | Potri.002G018300.1 | 1.0304  | 18.1314  | -4.1372 | Down | 7.87E-59  | 9.16E-58  |

|               |                    |         |          |         |      |           |           |
|---------------|--------------------|---------|----------|---------|------|-----------|-----------|
| Unigene117025 | Potri.004G234100.1 | 0.3281  | 5.7744   | -4.1375 | Down | 9.19E-13  | 3.03E-12  |
| Unigene48370  | Potri.007G102200.2 | 1.8323  | 32.2892  | -4.1393 | Down | 4.21E-55  | 4.56E-54  |
| Unigene17321  | Potri.001G079000.4 | 1.8312  | 32.2935  | -4.1404 | Down | 2.55E-74  | 3.84E-73  |
| Unigene41317  | Potri.011G024700.1 | 0.8501  | 14.9979  | -4.141  | Down | 4.05E-32  | 2.61E-31  |
| Unigene70790  | Potri.002G134300.2 | 8.3506  | 147.5457 | -4.1431 | Down | 2.88E-174 | 1.25E-172 |
| Unigene92994  | Potri.007G080600.7 | 31.1662 | 550.6833 | -4.1432 | Down | 0         | 0         |
| Unigene88525  | Potri.002G134300.2 | 18.2601 | 322.8012 | -4.1439 | Down | 0         | 0         |
| Unigene17060  | Potri.015G028700.1 | 1.3338  | 23.6082  | -4.1457 | Down | 2.77E-109 | 6.63E-108 |
| Unigene55109  | Potri.010G109400.1 | 1.2613  | 22.3251  | -4.1457 | Down | 2.24E-28  | 1.30E-27  |
| Unigene52746  | Potri.002G229900.1 | 1.3108  | 23.2381  | -4.148  | Down | 6.54E-44  | 5.60E-43  |
| Unigene26784  | Potri.006G012300.1 | 1.0027  | 17.7881  | -4.149  | Down | 2.05E-59  | 2.41E-58  |
| Unigene37991  | Potri.008G136400.1 | 7.7957  | 138.4516 | -4.1506 | Down | 0         | 0         |
| Unigene37581  | Potri.018G148800.7 | 9.5178  | 169.055  | -4.1507 | Down | 0         | 0         |
| Unigene111869 | Potri.014G198000.1 | 0.3148  | 5.5954   | -4.1517 | Down | 5.72E-09  | 1.53E-08  |
| Unigene96934  | Potri.009G055100.1 | 0.1918  | 3.409    | -4.1517 | Down | 5.72E-09  | 1.53E-08  |
| Unigene97111  | Potri.005G239500.1 | 0.1884  | 3.3488   | -4.1518 | Down | 5.72E-09  | 1.53E-08  |
| Unigene116357 | Potri.005G070100.3 | 0.2361  | 4.1966   | -4.1518 | Down | 5.72E-09  | 1.53E-08  |
| Unigene111445 | Potri.004G208300.1 | 0.3202  | 5.6915   | -4.1518 | Down | 5.72E-09  | 1.53E-08  |
| Unigene96868  | Potri.001G297500.1 | 0.2376  | 4.2233   | -4.1518 | Down | 1.25E-24  | 6.44E-24  |
| Unigene71024  | Potri.001G240900.1 | 2.2268  | 39.5854  | -4.1519 | Down | 6.19E-48  | 5.80E-47  |
| Unigene106753 | Potri.T084900.1    | 0.1707  | 3.0346   | -4.152  | Down | 5.72E-09  | 1.54E-08  |
| Unigene116889 | Potri.018G150700.2 | 0.444   | 7.8935   | -4.152  | Down | 7.92E-17  | 3.12E-16  |
| Unigene104500 | Potri.017G073900.2 | 0.302   | 5.3689   | -4.152  | Down | 5.72E-09  | 1.54E-08  |
| Unigene105934 | Potri.007G120700.1 | 0.2895  | 5.1466   | -4.152  | Down | 1.25E-24  | 6.44E-24  |
| Unigene115402 | Potri.016G072800.1 | 0.259   | 4.6046   | -4.1521 | Down | 5.72E-09  | 1.53E-08  |
| Unigene111338 | Potri.006G067100.1 | 0.3215  | 5.716    | -4.1521 | Down | 5.72E-09  | 1.53E-08  |
| Unigene117504 | Potri.003G073700.4 | 0.2038  | 3.6233   | -4.1521 | Down | 5.72E-09  | 1.53E-08  |
| Unigene100960 | Potri.009G035100.1 | 0.1893  | 3.3658   | -4.1522 | Down | 5.72E-09  | 1.54E-08  |
| Unigene84103  | Potri.012G006300.1 | 20.4808 | 364.5894 | -4.1539 | Down | 0         | 0         |
| Unigene20565  | Potri.017G015800.1 | 0.71    | 12.6471  | -4.1548 | Down | 1.05E-59  | 1.24E-58  |
| Unigene106852 | Potri.008G182200.1 | 0.7125  | 12.7042  | -4.1563 | Down | 3.27E-79  | 5.31E-78  |
| Unigene30665  | Potri.007G082500.1 | 6.1183  | 109.1195 | -4.1566 | Down | 0         | 0         |
| Unigene38072  | Potri.010G094700.5 | 1.7904  | 31.9874  | -4.1591 | Down | 3.16E-48  | 2.98E-47  |
| Unigene14576  | Potri.004G084000.1 | 1.5173  | 27.108   | -4.1591 | Down | 3.16E-48  | 2.98E-47  |
| Unigene100152 | Potri.017G112900.1 | 1.0785  | 19.2695  | -4.1592 | Down | 3.16E-48  | 2.98E-47  |
| Unigene36545  | Potri.004G084000.1 | 0.6457  | 11.5399  | -4.1596 | Down | 9.58E-68  | 1.30E-66  |
| Unigene25042  | Potri.001G122800.1 | 0.6279  | 11.2302  | -4.1607 | Down | 7.02E-21  | 3.22E-20  |
| Unigene26296  | Potri.005G241500.1 | 1.4137  | 25.3061  | -4.1619 | Down | 3.00E-52  | 3.06E-51  |
| Unigene13053  | Potri.005G185100.1 | 3.4473  | 61.7263  | -4.1623 | Down | 1.18E-196 | 6.04E-195 |

|               |                    |         |          |         |      |           |           |
|---------------|--------------------|---------|----------|---------|------|-----------|-----------|
| Unigene99370  | Potri.013G083400.1 | 0.2833  | 5.0867   | -4.1663 | Down | 4.68E-13  | 1.57E-12  |
| Unigene27148  | Potri.005G063400.1 | 0.4702  | 8.4423   | -4.1663 | Down | 4.68E-13  | 1.57E-12  |
| Unigene101874 | Potri.007G046700.3 | 0.4512  | 8.1019   | -4.1664 | Down | 4.68E-13  | 1.57E-12  |
| Unigene99060  | Potri.005G211000.1 | 0.2677  | 4.8068   | -4.1664 | Down | 4.68E-13  | 1.57E-12  |
| Unigene98104  | Potri.010G206100.1 | 0.2929  | 5.2598   | -4.1665 | Down | 4.68E-13  | 1.57E-12  |
| Unigene115652 | Potri.008G037800.1 | 0.3793  | 6.8111   | -4.1665 | Down | 4.68E-13  | 1.57E-12  |
| Unigene106007 | Potri.001G036600.1 | 0.1732  | 3.1103   | -4.1665 | Down | 4.68E-13  | 1.57E-12  |
| Unigene117146 | Potri.008G113700.2 | 0.3215  | 5.7737   | -4.1666 | Down | 4.68E-13  | 1.57E-12  |
| Unigene117344 | Potri.001G416300.1 | 0.3134  | 5.6282   | -4.1666 | Down | 4.68E-13  | 1.57E-12  |
| Unigene118815 | Potri.005G086500.1 | 1.4259  | 25.6312  | -4.168  | Down | 4.51E-76  | 6.97E-75  |
| Unigene118876 | Potri.015G003700.1 | 2.4041  | 43.3247  | -4.1716 | Down | 2.16E-131 | 6.51E-130 |
| Unigene45928  | Potri.008G141800.1 | 0.4844  | 8.7297   | -4.1717 | Down | 8.68E-45  | 7.57E-44  |
| Unigene119279 | Potri.016G100800.1 | 0.2271  | 4.098    | -4.1735 | Down | 4.03E-17  | 1.61E-16  |
| Unigene104937 | Potri.012G016400.1 | 0.5921  | 10.6842  | -4.1735 | Down | 4.03E-17  | 1.61E-16  |
| Unigene116748 | Potri.013G150500.1 | 0.4521  | 8.1588   | -4.1736 | Down | 4.03E-17  | 1.61E-16  |
| Unigene119143 | Potri.001G367400.6 | 1.0047  | 18.1307  | -4.1736 | Down | 1.33E-64  | 1.71E-63  |
| Unigene80416  | Potri.010G112200.8 | 18.1986 | 329.0974 | -4.1766 | Down | 0         | 0         |
| Unigene26955  | Potri.009G144000.1 | 0.79    | 14.2867  | -4.1767 | Down | 7.41E-57  | 8.32E-56  |
| Unigene104134 | Potri.T108100.1    | 0.4327  | 7.8319   | -4.1779 | Down | 3.58E-21  | 1.66E-20  |
| Unigene76780  | Potri.013G159000.4 | 11.6152 | 210.6198 | -4.1806 | Down | 6.83E-283 | 5.55E-281 |
| Unigene104698 | Potri.016G040300.1 | 0.2068  | 3.7511   | -4.181  | Down | 3.23E-25  | 1.70E-24  |
| Unigene77300  | Potri.004G234100.1 | 19.2985 | 350.3102 | -4.1821 | Down | 0         | 0         |
| Unigene109332 | Potri.003G204000.1 | 1.2201  | 22.1582  | -4.1828 | Down | 2.96E-29  | 1.76E-28  |
| Unigene95580  | Potri.003G183100.1 | 0.3719  | 6.7548   | -4.1829 | Down | 2.96E-29  | 1.76E-28  |
| Unigene104310 | Potri.014G086300.7 | 0.486   | 8.8355   | -4.1843 | Down | 2.74E-33  | 1.82E-32  |
| Unigene997    | Potri.017G131800.1 | 12.1272 | 220.6022 | -4.1851 | Down | 0         | 0         |
| Unigene48246  | Potri.002G175200.1 | 0.5914  | 10.7601  | -4.1854 | Down | 4.53E-109 | 1.08E-107 |
| Unigene30730  | Potri.003G150800.1 | 2.118   | 38.5372  | -4.1855 | Down | 3.17E-73  | 4.69E-72  |
| Unigene28000  | Potri.008G010600.5 | 5.4786  | 99.8566  | -4.188  | Down | 1.15E-292 | 9.90E-291 |
| Unigene37692  | Potri.006G195100.1 | 5.6801  | 103.9648 | -4.194  | Down | 0         | 0         |
| Unigene110353 | Potri.009G068900.1 | 0.1673  | 3.0634   | -4.1946 | Down | 3.98E-05  | 7.96E-05  |
| Unigene46494  | Potri.007G089000.1 | 0.1847  | 3.3819   | -4.1946 | Down | 3.98E-05  | 7.95E-05  |
| Unigene100586 | Potri.019G055800.1 | 0.1811  | 3.3163   | -4.1947 | Down | 2.91E-09  | 7.95E-09  |
| Unigene115530 | Potri.016G133500.1 | 0.2564  | 4.6952   | -4.1947 | Down | 2.91E-09  | 7.94E-09  |
| Unigene108707 | Potri.001G175600.1 | 0.1785  | 3.2687   | -4.1947 | Down | 3.98E-05  | 7.96E-05  |
| Unigene103973 | Potri.T124900.1    | 0.3376  | 6.1823   | -4.1948 | Down | 2.91E-09  | 7.95E-09  |
| Unigene101523 | Potri.018G052000.1 | 0.3718  | 6.8088   | -4.1948 | Down | 2.38E-13  | 8.07E-13  |
| Unigene104675 | Potri.016G049300.1 | 0.3213  | 5.8841   | -4.1948 | Down | 1.22E-41  | 9.94E-41  |
| Unigene104364 | Potri.016G027200.1 | 0.2713  | 4.9684   | -4.1948 | Down | 2.91E-09  | 7.95E-09  |

|               |                    |         |          |         |      |           |           |
|---------------|--------------------|---------|----------|---------|------|-----------|-----------|
| Unigene109681 | Potri.014G165700.1 | 0.1719  | 3.1481   | -4.1948 | Down | 3.98E-05  | 7.96E-05  |
| Unigene105917 | Potri.010G002400.1 | 0.1723  | 3.1554   | -4.1948 | Down | 2.91E-09  | 7.94E-09  |
| Unigene115353 | Potri.006G110900.1 | 0.5199  | 9.5212   | -4.1948 | Down | 2.05E-17  | 8.28E-17  |
| Unigene109457 | Potri.003G091100.4 | 0.1735  | 3.1774   | -4.1948 | Down | 3.98E-05  | 7.96E-05  |
| Unigene100061 | Potri.002G180900.1 | 0.1913  | 3.5033   | -4.1948 | Down | 2.91E-09  | 7.95E-09  |
| Unigene117732 | Potri.001G359700.2 | 0.2945  | 5.3933   | -4.1948 | Down | 2.38E-13  | 8.07E-13  |
| Unigene100970 | Potri.T051500.1    | 0.5948  | 10.893   | -4.1949 | Down | 1.51E-29  | 9.04E-29  |
| Unigene103960 | Potri.005G038300.1 | 0.3195  | 5.8514   | -4.1949 | Down | 2.05E-17  | 8.28E-17  |
| Unigene116520 | Potri.T023100.1    | 0.3475  | 6.3647   | -4.195  | Down | 2.38E-13  | 8.07E-13  |
| Unigene109396 | Potri.015G118100.2 | 0.1743  | 3.1923   | -4.195  | Down | 3.98E-05  | 7.96E-05  |
| Unigene118047 | Potri.015G060400.1 | 0.1851  | 3.3903   | -4.195  | Down | 2.91E-09  | 7.94E-09  |
| Unigene5486   | Potri.010G253700.2 | 0.3947  | 7.2291   | -4.195  | Down | 2.05E-17  | 8.28E-17  |
| Unigene102302 | Potri.008G132700.2 | 0.1851  | 3.3903   | -4.195  | Down | 2.91E-09  | 7.95E-09  |
| Unigene112737 | Potri.007G080700.1 | 0.6065  | 11.1081  | -4.195  | Down | 2.05E-17  | 8.28E-17  |
| Unigene9215   | Potri.006G103200.1 | 1.1134  | 20.3925  | -4.195  | Down | 8.95E-66  | 1.18E-64  |
| Unigene115238 | Potri.014G174700.1 | 0.3926  | 7.191    | -4.1951 | Down | 2.38E-13  | 8.07E-13  |
| Unigene110527 | Potri.014G089700.2 | 0.1665  | 3.0498   | -4.1951 | Down | 3.98E-05  | 7.96E-05  |
| Unigene96852  | Potri.011G091100.1 | 0.1751  | 3.2073   | -4.1951 | Down | 3.98E-05  | 7.95E-05  |
| Unigene112110 | Potri.008G133900.9 | 0.3121  | 5.7167   | -4.1951 | Down | 2.91E-09  | 7.94E-09  |
| Unigene36734  | Potri.005G214500.1 | 0.4616  | 8.4548   | -4.1951 | Down | 1.82E-21  | 8.51E-21  |
| Unigene105683 | Potri.002G138100.1 | 0.2331  | 4.2697   | -4.1951 | Down | 2.91E-09  | 7.94E-09  |
| Unigene109313 | Potri.001G462800.1 | 0.1751  | 3.2073   | -4.1951 | Down | 3.98E-05  | 7.96E-05  |
| Unigene117107 | Potri.012G111800.1 | 0.2162  | 3.9603   | -4.1952 | Down | 2.91E-09  | 7.94E-09  |
| Unigene38106  | Potri.009G121200.2 | 0.186   | 3.4072   | -4.1952 | Down | 2.91E-09  | 7.94E-09  |
| Unigene110809 | Potri.006G014800.1 | 0.165   | 3.0228   | -4.1953 | Down | 3.98E-05  | 7.96E-05  |
| Unigene117938 | Potri.003G140200.1 | 0.1893  | 3.4678   | -4.1953 | Down | 2.91E-09  | 7.94E-09  |
| Unigene100852 | Potri.001G162000.1 | 0.1695  | 3.1052   | -4.1953 | Down | 3.98E-05  | 7.96E-05  |
| Unigene20035  | Potri.017G107700.1 | 2.8692  | 52.6382  | -4.1974 | Down | 2.42E-142 | 8.07E-141 |
| Unigene97495  | Potri.018G117200.1 | 10.0364 | 184.1418 | -4.1975 | Down | 5.92E-271 | 4.55E-269 |
| Unigene44121  | Potri.014G078000.1 | 1.0745  | 19.7343  | -4.199  | Down | 3.74E-86  | 6.67E-85  |
| Unigene87901  | Potri.006G263500.1 | 11.9727 | 219.9024 | -4.199  | Down | 0         | 0         |
| Unigene53944  | Potri.T177600.1    | 15.0633 | 277.4325 | -4.203  | Down | 0         | 0         |
| Unigene14856  | Potri.012G128100.1 | 20.8423 | 384.2328 | -4.2044 | Down | 0         | 0         |
| Unigene51112  | Potri.002G134300.2 | 9.9663  | 183.9164 | -4.2058 | Down | 0         | 0         |
| Unigene92047  | Potri.012G031100.7 | 13.9461 | 257.3809 | -4.206  | Down | 0         | 0         |
| Unigene5352   | Potri.001G321500.1 | 1.1254  | 20.7855  | -4.2071 | Down | 7.67E-30  | 4.64E-29  |
| Unigene99909  | Potri.016G060600.1 | 0.9796  | 18.1036  | -4.2079 | Down | 2.67E-54  | 2.84E-53  |
| Unigene37316  | Potri.007G097500.2 | 3.3834  | 62.5893  | -4.2094 | Down | 3.62E-168 | 1.51E-166 |
| Unigene35277  | Potri.011G146800.2 | 0.6873  | 12.7305  | -4.2112 | Down | 2.12E-107 | 4.95E-106 |

|               |                    |        |          |         |      |           |           |
|---------------|--------------------|--------|----------|---------|------|-----------|-----------|
| Unigene108830 | Potri.008G074300.3 | 0.8881 | 16.4568  | -4.2118 | Down | 9.26E-22  | 4.37E-21  |
| Unigene3201   | Potri.001G162400.1 | 0.9035 | 16.7616  | -4.2135 | Down | 4.60E-132 | 1.40E-130 |
| Unigene15197  | Potri.001G068000.2 | 1.9242 | 35.7202  | -4.2144 | Down | 1.36E-54  | 1.46E-53  |
| Unigene90444  | Potri.001G076600.1 | 3.3199 | 61.6454  | -4.2148 | Down | 2.21E-140 | 7.26E-139 |
| Unigene47295  | Potri.015G003700.2 | 2.4362 | 45.2536  | -4.2153 | Down | 5.02E-120 | 1.35E-118 |
| Unigene97923  | Potri.005G230200.1 | 0.4088 | 7.5967   | -4.2159 | Down | 3.61E-34  | 2.45E-33  |
| Unigene6265   | Potri.001G180600.2 | 3.1191 | 57.9675  | -4.216  | Down | 1.15E-99  | 2.46E-98  |
| Unigene105939 | Potri.010G098400.1 | 0.2069 | 3.8457   | -4.2162 | Down | 1.04E-17  | 4.26E-17  |
| Unigene11156  | Potri.002G163400.1 | 3.3803 | 62.8731  | -4.2172 | Down | 0         | 0         |
| Unigene119056 | Potri.004G046600.1 | 0.7301 | 13.5857  | -4.2179 | Down | 1.52E-46  | 1.38E-45  |
| Unigene23724  | Potri.T126700.1    | 1.6064 | 29.9053  | -4.2185 | Down | 2.60E-206 | 1.40E-204 |
| Unigene3312   | Potri.002G149600.1 | 0.9767 | 18.1886  | -4.219  | Down | 1.28E-87  | 2.33E-86  |
| Unigene105877 | Potri.015G015800.1 | 0.8232 | 15.3509  | -4.2209 | Down | 6.93E-55  | 7.46E-54  |
| Unigene34551  | Potri.003G139600.1 | 4.1182 | 76.8632  | -4.2222 | Down | 0         | 0         |
| Unigene105006 | Potri.018G027000.1 | 0.31   | 5.7885   | -4.2228 | Down | 1.21E-13  | 4.15E-13  |
| Unigene112994 | Potri.016G136700.1 | 0.4494 | 8.3921   | -4.223  | Down | 1.21E-13  | 4.15E-13  |
| Unigene102981 | Potri.005G180100.2 | 0.1624 | 3.0328   | -4.223  | Down | 1.21E-13  | 4.15E-13  |
| Unigene98121  | Potri.T141300.1    | 0.2584 | 4.8259   | -4.2231 | Down | 1.21E-13  | 4.15E-13  |
| Unigene44376  | Potri.006G061000.1 | 0.9255 | 17.3006  | -4.2244 | Down | 3.30E-166 | 1.36E-164 |
| Unigene26975  | Potri.008G065000.1 | 4.7197 | 88.3012  | -4.2257 | Down | 0         | 0         |
| Unigene35631  | Potri.011G004000.1 | 0.8296 | 15.5414  | -4.2276 | Down | 9.09E-204 | 4.82E-202 |
| Unigene47040  | Potri.011G069500.1 | 0.3366 | 6.3107   | -4.2287 | Down | 4.71E-22  | 2.24E-21  |
| Unigene57772  | Potri.002G212900.1 | 6.9216 | 129.9657 | -4.2309 | Down | 0         | 0         |
| Unigene26313  | Potri.018G109100.1 | 5.8978 | 111.1104 | -4.2357 | Down | 2.39E-155 | 8.95E-154 |
| Unigene117828 | Potri.019G071900.3 | 0.1928 | 3.6343   | -4.2365 | Down | 1.48E-09  | 4.10E-09  |
| Unigene115227 | Potri.008G178200.3 | 0.2618 | 4.935    | -4.2365 | Down | 1.48E-09  | 4.11E-09  |
| Unigene118003 | Potri.005G107900.1 | 0.187  | 3.525    | -4.2365 | Down | 1.48E-09  | 4.10E-09  |
| Unigene118544 | Potri.019G075700.2 | 0.1647 | 3.1048   | -4.2366 | Down | 1.48E-09  | 4.10E-09  |
| Unigene111268 | Potri.018G009400.4 | 0.6459 | 12.1773  | -4.2367 | Down | 5.30E-18  | 2.19E-17  |
| Unigene14629  | Potri.018G117600.1 | 0.4483 | 8.4524   | -4.2368 | Down | 4.16E-43  | 3.50E-42  |
| Unigene66422  | Potri.015G043000.2 | 0.2972 | 5.6035   | -4.2368 | Down | 1.48E-09  | 4.10E-09  |
| Unigene106182 | Potri.015G029900.1 | 0.2194 | 4.1367   | -4.2368 | Down | 1.48E-09  | 4.11E-09  |
| Unigene67130  | Potri.010G112200.9 | 9.36   | 176.472  | -4.2368 | Down | 0         | 0         |
| Unigene115787 | Potri.003G221800.2 | 0.499  | 9.4079   | -4.2368 | Down | 5.30E-18  | 2.19E-17  |
| Unigene102546 | Potri.001G194100.1 | 0.2636 | 4.9699   | -4.2368 | Down | 5.30E-18  | 2.19E-17  |
| Unigene106441 | Potri.018G093200.1 | 0.2101 | 3.9619   | -4.237  | Down | 1.48E-09  | 4.11E-09  |
| Unigene116581 | Potri.017G121800.1 | 0.2302 | 4.341    | -4.2371 | Down | 1.48E-09  | 4.10E-09  |
| Unigene25441  | Potri.002G134300.2 | 3.7068 | 70.0121  | -4.2394 | Down | 2.62E-268 | 1.99E-266 |
| Unigene42697  | Potri.006G034000.1 | 5.1634 | 97.6816  | -4.2417 | Down | 0         | 0         |

|               |                    |         |          |         |      |           |           |
|---------------|--------------------|---------|----------|---------|------|-----------|-----------|
| Unigene77056  | Potri.003G139600.1 | 12.5418 | 237.4261 | -4.2427 | Down | 0         | 0         |
| Unigene67173  | Potri.012G090500.1 | 13.6441 | 258.3595 | -4.243  | Down | 0         | 0         |
| Unigene14838  | Potri.005G054600.1 | 4.5087  | 85.4488  | -4.2443 | Down | 9.01E-186 | 4.29E-184 |
| Unigene48124  | Potri.006G125000.1 | 0.5138  | 9.7419   | -4.2449 | Down | 2.39E-22  | 1.15E-21  |
| Unigene37015  | Potri.015G022100.1 | 1.469   | 27.8682  | -4.2457 | Down | 5.36E-98  | 1.12E-96  |
| Unigene107084 | Potri.013G135200.1 | 0.2092  | 3.981    | -4.2502 | Down | 6.14E-14  | 2.14E-13  |
| Unigene95971  | Potri.014G066000.4 | 0.554   | 10.5436  | -4.2503 | Down | 1.10E-26  | 6.07E-26  |
| Unigene106859 | Potri.T080900.1    | 0.3225  | 6.1378   | -4.2504 | Down | 1.10E-26  | 6.07E-26  |
| Unigene119027 | Potri.014G158400.2 | 0.2031  | 3.8654   | -4.2504 | Down | 6.14E-14  | 2.14E-13  |
| Unigene112763 | Potri.001G178000.3 | 0.4549  | 8.6578   | -4.2504 | Down | 6.14E-14  | 2.14E-13  |
| Unigene85789  | Potri.013G159000.4 | 5.3467  | 101.7659 | -4.2505 | Down | 2.44E-178 | 1.10E-176 |
| Unigene89143  | Potri.017G061600.1 | 7.4813  | 142.5481 | -4.252  | Down | 1.81E-296 | 1.57E-294 |
| Unigene45328  | Potri.004G084000.1 | 3.2581  | 62.0934  | -4.2523 | Down | 7.68E-124 | 2.15E-122 |
| Unigene111118 | Potri.015G059600.1 | 1.1402  | 21.7597  | -4.2543 | Down | 5.13E-31  | 3.20E-30  |
| Unigene96211  | Potri.008G124000.3 | 0.4239  | 8.1055   | -4.2571 | Down | 2.69E-18  | 1.12E-17  |
| Unigene116274 | Potri.008G038400.1 | 0.4752  | 9.0865   | -4.2571 | Down | 2.69E-18  | 1.12E-17  |
| Unigene118968 | Potri.003G147300.1 | 0.2789  | 5.333    | -4.2571 | Down | 2.69E-18  | 1.12E-17  |
| Unigene119508 | Potri.013G010400.1 | 1.1117  | 21.2697  | -4.258  | Down | 1.99E-124 | 5.58E-123 |
| Unigene33664  | Potri.011G142400.1 | 1.8738  | 35.8954  | -4.2598 | Down | 2.40E-137 | 7.67E-136 |
| Unigene3709   | Potri.018G055500.1 | 3.1196  | 59.7664  | -4.2599 | Down | 3.58E-99  | 7.61E-98  |
| Unigene119445 | Potri.015G028700.1 | 0.6585  | 12.6181  | -4.2602 | Down | 5.80E-61  | 7.01E-60  |
| Unigene107109 | Potri.006G004200.1 | 0.4848  | 9.2976   | -4.2614 | Down | 2.82E-65  | 3.67E-64  |
| Unigene65332  | Potri.017G096600.1 | 2.6222  | 50.3324  | -4.2626 | Down | 6.21E-210 | 3.41E-208 |
| Unigene46366  | Potri.004G097100.1 | 3.3528  | 64.4167  | -4.264  | Down | 8.95E-104 | 2.00E-102 |
| Unigene119013 | Potri.004G063600.1 | 0.4091  | 7.8607   | -4.2641 | Down | 5.59E-27  | 3.11E-26  |
| Unigene104716 | Potri.011G125400.1 | 1.8867  | 36.2761  | -4.2651 | Down | 6.09E-57  | 6.84E-56  |
| Unigene56591  | Potri.008G065000.1 | 8.117   | 156.3683 | -4.2679 | Down | 0         | 0         |
| Unigene27067  | Potri.003G072800.1 | 7.0938  | 136.8269 | -4.2696 | Down | 9.42E-267 | 7.10E-265 |
| Unigene118037 | Potri.008G189400.5 | 1.1134  | 21.4921  | -4.2708 | Down | 6.40E-53  | 6.64E-52  |
| Unigene15540  | Potri.014G060500.1 | 1.9157  | 37.0287  | -4.2727 | Down | 1.72E-74  | 2.60E-73  |
| Unigene97757  | Potri.008G062200.1 | 0.1692  | 3.2804   | -4.2771 | Down | 7.48E-10  | 2.12E-09  |
| Unigene112054 | Potri.004G017700.3 | 0.1561  | 3.0265   | -4.2771 | Down | 2.01E-05  | 4.14E-05  |
| Unigene108942 | Potri.016G074300.1 | 0.1768  | 3.4281   | -4.2772 | Down | 2.01E-05  | 4.14E-05  |
| Unigene108999 | Potri.014G098400.1 | 0.1768  | 3.4281   | -4.2772 | Down | 2.01E-05  | 4.14E-05  |
| Unigene108701 | Potri.014G051700.1 | 0.1785  | 3.4609   | -4.2772 | Down | 2.01E-05  | 4.14E-05  |
| Unigene110603 | Potri.009G029600.2 | 0.1658  | 3.2148   | -4.2772 | Down | 2.01E-05  | 4.14E-05  |
| Unigene109015 | Potri.008G188500.1 | 0.1768  | 3.4281   | -4.2772 | Down | 2.01E-05  | 4.14E-05  |
| Unigene108996 | Potri.008G079900.2 | 0.1768  | 3.4281   | -4.2772 | Down | 2.01E-05  | 4.14E-05  |
| Unigene110616 | Potri.006G070700.4 | 0.1658  | 3.2148   | -4.2772 | Down | 2.01E-05  | 4.14E-05  |

|               |                    |        |         |         |      |           |           |
|---------------|--------------------|--------|---------|---------|------|-----------|-----------|
| Unigene115218 | Potri.006G048100.1 | 0.2618 | 5.076   | -4.2772 | Down | 7.48E-10  | 2.12E-09  |
| Unigene117843 | Potri.002G257800.1 | 0.1928 | 3.7382  | -4.2772 | Down | 7.48E-10  | 2.12E-09  |
| Unigene111060 | Potri.T138900.1    | 0.1629 | 3.1587  | -4.2773 | Down | 2.01E-05  | 4.14E-05  |
| Unigene109642 | Potri.016G063300.1 | 0.1727 | 3.3488  | -4.2773 | Down | 2.01E-05  | 4.14E-05  |
| Unigene102933 | Potri.008G052400.2 | 0.2627 | 5.0939  | -4.2773 | Down | 7.48E-10  | 2.12E-09  |
| Unigene101040 | Potri.005G146000.3 | 0.4527 | 8.7783  | -4.2773 | Down | 6.17E-23  | 3.02E-22  |
| Unigene109653 | Potri.003G114400.1 | 0.1727 | 3.3488  | -4.2773 | Down | 2.01E-05  | 4.14E-05  |
| Unigene109594 | Potri.001G047500.1 | 0.1727 | 3.3488  | -4.2773 | Down | 2.01E-05  | 4.14E-05  |
| Unigene105864 | Potri.017G138500.7 | 0.4813 | 9.3333  | -4.2774 | Down | 2.84E-27  | 1.59E-26  |
| Unigene111552 | Potri.016G053800.1 | 0.1594 | 3.0912  | -4.2774 | Down | 2.01E-05  | 4.14E-05  |
| Unigene107410 | Potri.016G031400.1 | 0.1865 | 3.6167  | -4.2774 | Down | 2.01E-05  | 4.14E-05  |
| Unigene119221 | Potri.015G023200.1 | 1.0657 | 20.6667 | -4.2774 | Down | 4.28E-79  | 6.93E-78  |
| Unigene115141 | Potri.010G251700.8 | 0.2636 | 5.1119  | -4.2774 | Down | 7.48E-10  | 2.12E-09  |
| Unigene96245  | Potri.007G124700.1 | 0.2677 | 5.1914  | -4.2774 | Down | 3.12E-14  | 1.10E-13  |
| Unigene108352 | Potri.004G138000.1 | 0.3604 | 6.9887  | -4.2774 | Down | 7.48E-10  | 2.12E-09  |
| Unigene115773 | Potri.002G262900.1 | 1.2517 | 24.2729 | -4.2774 | Down | 1.41E-44  | 1.22E-43  |
| Unigene30828  | Potri.002G085100.2 | 0.9966 | 19.3257 | -4.2774 | Down | 7.61E-62  | 9.33E-61  |
| Unigene40972  | Potri.001G348300.1 | 0.7936 | 15.3901 | -4.2774 | Down | 6.17E-23  | 3.02E-22  |
| Unigene112346 | Potri.001G054800.1 | 0.4624 | 8.9669  | -4.2774 | Down | 3.12E-14  | 1.10E-13  |
| Unigene116622 | Potri.003G172400.2 | 0.5738 | 11.1282 | -4.2775 | Down | 6.17E-23  | 3.02E-22  |
| Unigene115372 | Potri.016G066000.4 | 0.518  | 10.0463 | -4.2776 | Down | 1.37E-18  | 5.77E-18  |
| Unigene61084  | Potri.015G050800.1 | 0.1793 | 3.4776  | -4.2776 | Down | 2.01E-05  | 4.13E-05  |
| Unigene110337 | Potri.011G049700.1 | 0.168  | 3.2583  | -4.2776 | Down | 2.01E-05  | 4.14E-05  |
| Unigene117509 | Potri.006G237200.1 | 0.3057 | 5.929   | -4.2776 | Down | 3.12E-14  | 1.10E-13  |
| Unigene110566 | Potri.003G131300.4 | 0.1665 | 3.2292  | -4.2776 | Down | 2.01E-05  | 4.14E-05  |
| Unigene117579 | Potri.002G023600.4 | 0.2016 | 3.9099  | -4.2776 | Down | 7.48E-10  | 2.12E-09  |
| Unigene112203 | Potri.001G323100.4 | 0.1554 | 3.0139  | -4.2776 | Down | 2.01E-05  | 4.14E-05  |
| Unigene98691  | Potri.018G136000.1 | 0.2125 | 4.1216  | -4.2777 | Down | 7.48E-10  | 2.12E-09  |
| Unigene118928 | Potri.011G116900.1 | 0.2135 | 4.1412  | -4.2777 | Down | 3.12E-14  | 1.10E-13  |
| Unigene107874 | Potri.011G063100.1 | 0.1837 | 3.5632  | -4.2777 | Down | 2.01E-05  | 4.14E-05  |
| Unigene96429  | Potri.015G080200.1 | 0.1828 | 3.5458  | -4.2778 | Down | 2.01E-05  | 4.13E-05  |
| Unigene98673  | Potri.001G454500.1 | 0.165  | 3.2006  | -4.2778 | Down | 2.01E-05  | 4.13E-05  |
| Unigene16238  | Potri.T084300.3    | 1.3321 | 25.9638 | -4.2847 | Down | 3.43E-49  | 3.29E-48  |
| Unigene74854  | Potri.002G040700.1 | 2.5665 | 50.1393 | -4.2881 | Down | 9.52E-67  | 1.27E-65  |
| Unigene103384 | Potri.018G149300.1 | 0.7888 | 15.4185 | -4.2889 | Down | 6.71E-32  | 4.30E-31  |
| Unigene101822 | Potri.013G121100.1 | 0.4926 | 9.6293  | -4.2889 | Down | 6.71E-32  | 4.30E-31  |
| Unigene12904  | Potri.018G149300.1 | 1.6687 | 32.624  | -4.2891 | Down | 1.74E-149 | 6.20E-148 |
| Unigene31609  | Potri.011G067500.1 | 1.2032 | 23.5328 | -4.2897 | Down | 4.05E-58  | 4.65E-57  |
| Unigene119513 | Potri.002G114800.1 | 0.2238 | 4.3802  | -4.2907 | Down | 1.44E-27  | 8.15E-27  |

|               |                     |         |          |         |      |           |           |
|---------------|---------------------|---------|----------|---------|------|-----------|-----------|
| Unigene117991 | Potri.009G055100.1  | 0.4686  | 9.1881   | -4.2933 | Down | 3.13E-23  | 1.55E-22  |
| Unigene42833  | Potri.010G097200.1  | 1.4884  | 29.1848  | -4.2934 | Down | 7.98E-220 | 4.64E-218 |
| Unigene104312 | Potri.006G186900.2  | 0.8477  | 16.6424  | -4.2952 | Down | 7.61E-41  | 6.09E-40  |
| Unigene55230  | Potri.006G186200.2  | 10.4621 | 205.3979 | -4.2952 | Down | 0         | 0         |
| Unigene67283  | Potri.018G148800.3  | 2.7531  | 54.0587  | -4.2954 | Down | 3.70E-137 | 1.18E-135 |
| Unigene6249   | Potri.005G148500.1  | 0.6169  | 12.1169  | -4.2958 | Down | 2.05E-58  | 2.37E-57  |
| Unigene99694  | Potri.009G146500.3  | 0.3316  | 6.5189   | -4.2971 | Down | 6.93E-19  | 2.96E-18  |
| Unigene39186  | Potri.017G096600.1  | 4.1835  | 82.3081  | -4.2983 | Down | 0         | 0         |
| Unigene29383  | Potri.T032000.1     | 1.849   | 36.4071  | -4.2994 | Down | 7.68E-129 | 2.26E-127 |
| Unigene71406  | Potri.003G139600.1  | 1.2862  | 25.3385  | -4.3001 | Down | 3.41E-32  | 2.20E-31  |
| Unigene104572 | Potri.013G108900.1  | 0.2801  | 5.519    | -4.3004 | Down | 3.41E-32  | 2.20E-31  |
| Unigene19259  | Potri.008G010600.5  | 2.0539  | 40.5393  | -4.3029 | Down | 1.30E-111 | 3.19E-110 |
| Unigene99192  | Potri.008G195300.5  | 0.2903  | 5.7333   | -4.3037 | Down | 7.30E-28  | 4.17E-27  |
| Unigene99845  | Potri.T051100.1     | 0.2914  | 5.7557   | -4.3039 | Down | 1.58E-14  | 5.63E-14  |
| Unigene102903 | Potri.017G054800.1  | 0.4865  | 9.6095   | -4.3039 | Down | 1.58E-14  | 5.63E-14  |
| Unigene118481 | Potri.009G005200.1  | 0.2509  | 4.9556   | -4.3039 | Down | 1.58E-14  | 5.63E-14  |
| Unigene102161 | Potri.008G205400.1  | 0.3443  | 6.8006   | -4.3039 | Down | 1.58E-14  | 5.64E-14  |
| Unigene102250 | Potri.004G120500.1  | 0.3134  | 6.191    | -4.3041 | Down | 1.58E-14  | 5.64E-14  |
| Unigene94185  | Potri.013G159000.4  | 27.6539 | 546.6212 | -4.305  | Down | 0         | 0         |
| Unigene86381  | Potri.013G033200.1  | 2.7262  | 53.9363  | -4.3063 | Down | 1.09E-98  | 2.30E-97  |
| Unigene57031  | Potri.004G168600.7  | 1.7839  | 35.2931  | -4.3063 | Down | 3.05E-147 | 1.07E-145 |
| Unigene46098  | Potri.019G078000.1  | 0.5058  | 10.0122  | -4.307  | Down | 8.13E-37  | 5.91E-36  |
| Unigene80714  | Potri.006G221800.3  | 21.4845 | 425.6417 | -4.3083 | Down | 0         | 0         |
| Unigene87525  | Potri.015G057800.1  | 0.5883  | 11.6626  | -4.3092 | Down | 1.59E-23  | 7.92E-23  |
| Unigene117445 | Potri.004G096600.1  | 2.9881  | 59.3897  | -4.3129 | Down | 2.59E-130 | 7.71E-129 |
| Unigene119019 | Potri.004G125800.1  | 2.1741  | 43.2595  | -4.3145 | Down | 8.05E-144 | 2.72E-142 |
| Unigene27790  | Potri.014G095100.1  | 8.6847  | 173.0363 | -4.3165 | Down | 0         | 0         |
| Unigene114332 | Potri.014G083900.2  | 0.2784  | 5.548    | -4.3167 | Down | 3.78E-10  | 1.09E-09  |
| Unigene101520 | Potri.004G062000.3  | 0.2261  | 4.5056   | -4.3167 | Down | 3.78E-10  | 1.09E-09  |
| Unigene117023 | Potri.001G100000.1  | 0.2188  | 4.3603   | -4.3167 | Down | 3.78E-10  | 1.09E-09  |
| Unigene117696 | Potri.016G082100.1  | 0.1979  | 3.9439   | -4.3168 | Down | 3.78E-10  | 1.09E-09  |
| Unigene119322 | Potri.007G131300.14 | 0.3277  | 6.5308   | -4.3168 | Down | 3.70E-28  | 2.13E-27  |
| Unigene109139 | Potri.010G229000.2  | 0.3519  | 7.0135   | -4.3169 | Down | 3.78E-10  | 1.09E-09  |
| Unigene119166 | Potri.008G109300.1  | 0.3724  | 7.4219   | -4.3169 | Down | 3.70E-28  | 2.13E-27  |
| Unigene112805 | Potri.001G456200.1  | 0.302   | 6.0196   | -4.317  | Down | 3.78E-10  | 1.09E-09  |
| Unigene116308 | Potri.T101000.1     | 0.2368  | 4.7202   | -4.3171 | Down | 3.78E-10  | 1.09E-09  |
| Unigene117513 | Potri.014G075800.1  | 0.4076  | 8.1249   | -4.3171 | Down | 3.51E-19  | 1.52E-18  |
| Unigene117093 | Potri.006G061000.1  | 0.2162  | 4.3097   | -4.3171 | Down | 3.78E-10  | 1.09E-09  |
| Unigene114967 | Potri.004G233000.3  | 0.2664  | 5.3102   | -4.3171 | Down | 3.78E-10  | 1.09E-09  |



|               |                    |        |          |         |      |           |           |
|---------------|--------------------|--------|----------|---------|------|-----------|-----------|
| Unigene48451  | Potri.002G054100.3 | 1.097  | 21.9192  | -4.3206 | Down | 1.15E-50  | 1.14E-49  |
| Unigene14970  | Potri.001G270600.1 | 2.4402 | 48.8231  | -4.3225 | Down | 1.47E-95  | 2.96E-94  |
| Unigene117631 | Potri.005G207200.1 | 0.5    | 10.0194  | -4.3247 | Down | 8.04E-24  | 4.05E-23  |
| Unigene5505   | Potri.012G128100.1 | 5.7294 | 114.8869 | -4.3257 | Down | 2.06E-221 | 1.20E-219 |
| Unigene23241  | Potri.008G074300.3 | 2.7653 | 55.4972  | -4.3269 | Down | 1.04E-194 | 5.25E-193 |
| Unigene23355  | Potri.016G125600.1 | 2.0012 | 40.1852  | -4.3277 | Down | 8.31E-213 | 4.62E-211 |
| Unigene28571  | Potri.019G057600.1 | 3.2571 | 65.4283  | -4.3283 | Down | 5.46E-141 | 1.80E-139 |
| Unigene36380  | Potri.015G046200.1 | 0.832  | 16.7314  | -4.3298 | Down | 1.88E-28  | 1.09E-27  |
| Unigene15516  | Potri.018G068700.1 | 0.3197 | 6.4296   | -4.3299 | Down | 7.99E-15  | 2.89E-14  |
| Unigene118294 | Potri.005G252000.2 | 0.2633 | 5.295    | -4.3299 | Down | 7.99E-15  | 2.89E-14  |
| Unigene118730 | Potri.005G092400.1 | 0.4672 | 9.3961   | -4.3299 | Down | 1.88E-28  | 1.09E-27  |
| Unigene30908  | Potri.005G084500.1 | 0.8396 | 16.8927  | -4.3306 | Down | 8.51E-182 | 3.93E-180 |
| Unigene37775  | Potri.001G263900.1 | 1.4874 | 29.954   | -4.3319 | Down | 3.50E-60  | 4.17E-59  |
| Unigene14901  | Potri.006G034000.3 | 10.517 | 211.9048 | -4.3326 | Down | 0         | 0         |
| Unigene13114  | Potri.009G169900.1 | 1.7    | 34.2598  | -4.3329 | Down | 2.55E-78  | 4.08E-77  |
| Unigene101483 | Potri.013G040700.4 | 0.2627 | 5.3061   | -4.3362 | Down | 1.78E-19  | 7.76E-19  |
| Unigene105691 | Potri.002G242200.6 | 0.3195 | 6.4537   | -4.3362 | Down | 1.78E-19  | 7.76E-19  |
| Unigene4395   | Potri.008G063800.5 | 2.1728 | 43.8916  | -4.3363 | Down | 7.23E-56  | 7.96E-55  |
| Unigene15507  | Potri.012G031100.4 | 9.7712 | 197.4845 | -4.3371 | Down | 0         | 0         |
| Unigene69068  | Potri.001G079600.1 | 8.2827 | 167.7141 | -4.3398 | Down | 0         | 0         |
| Unigene106611 | Potri.010G233000.2 | 0.2355 | 4.7695   | -4.34   | Down | 4.07E-24  | 2.07E-23  |
| Unigene111132 | Potri.008G152300.2 | 0.8109 | 16.4235  | -4.3401 | Down | 4.07E-24  | 2.07E-23  |
| Unigene12924  | Potri.001G270500.1 | 3.3092 | 67.0263  | -4.3402 | Down | 0         | 0         |
| Unigene27164  | Potri.004G100700.5 | 1.0113 | 20.5092  | -4.342  | Down | 6.55E-79  | 1.06E-77  |
| Unigene94812  | Potri.T171900.1    | 0.8351 | 16.9438  | -4.3427 | Down | 9.50E-29  | 5.57E-28  |
| Unigene105409 | Potri.013G039000.4 | 0.3049 | 6.1866   | -4.3427 | Down | 9.50E-29  | 5.57E-28  |
| Unigene15965  | Potri.018G009300.1 | 0.9286 | 18.842   | -4.3428 | Down | 9.50E-29  | 5.57E-28  |
| Unigene67947  | Potri.002G134300.2 | 7.1308 | 144.7849 | -4.3437 | Down | 1.88E-238 | 1.22E-236 |
| Unigene22838  | Potri.007G015200.2 | 3.2256 | 65.6485  | -4.3471 | Down | 7.79E-253 | 5.44E-251 |
| Unigene34374  | Potri.001G424700.1 | 0.9355 | 19.0522  | -4.3481 | Down | 2.38E-143 | 7.99E-142 |
| Unigene19651  | Potri.007G127000.1 | 2.7494 | 56.0816  | -4.3503 | Down | 4.81E-139 | 1.56E-137 |
| Unigene30823  | Potri.008G078900.1 | 2.2186 | 45.2644  | -4.3507 | Down | 6.80E-75  | 1.03E-73  |
| Unigene65190  | Potri.007G015200.1 | 4.3106 | 88.0473  | -4.3523 | Down | 1.98E-226 | 1.19E-224 |
| Unigene104782 | Potri.008G005300.1 | 0.1548 | 3.1681   | -4.3551 | Down | 1.02E-05  | 2.14E-05  |
| Unigene102681 | Potri.018G065300.1 | 0.1608 | 3.291    | -4.3552 | Down | 1.91E-10  | 5.60E-10  |
| Unigene108757 | Potri.013G134500.2 | 0.1785 | 3.6532   | -4.3552 | Down | 1.02E-05  | 2.14E-05  |
| Unigene110711 | Potri.005G175000.1 | 0.1658 | 3.3934   | -4.3552 | Down | 1.02E-05  | 2.14E-05  |
| Unigene96100  | Potri.005G018400.1 | 0.1811 | 3.7064   | -4.3552 | Down | 1.02E-05  | 2.14E-05  |
| Unigene107557 | Potri.001G327500.1 | 0.1856 | 3.7986   | -4.3552 | Down | 1.02E-05  | 2.14E-05  |

|               |                    |         |          |         |      |           |           |
|---------------|--------------------|---------|----------|---------|------|-----------|-----------|
| Unigene116700 | Potri.016G001700.1 | 0.5669  | 11.6036  | -4.3553 | Down | 2.06E-24  | 1.06E-23  |
| Unigene102236 | Potri.014G083400.1 | 0.3039  | 6.2201   | -4.3553 | Down | 8.99E-20  | 3.97E-19  |
| Unigene99234  | Potri.012G118600.1 | 0.2216  | 4.5358   | -4.3553 | Down | 4.04E-15  | 1.48E-14  |
| Unigene103595 | Potri.005G005400.1 | 0.2512  | 5.1415   | -4.3553 | Down | 1.91E-10  | 5.60E-10  |
| Unigene114081 | Potri.001G392600.2 | 0.4239  | 8.6764   | -4.3553 | Down | 4.04E-15  | 1.48E-14  |
| Unigene118355 | Potri.001G364800.1 | 0.3454  | 7.0696   | -4.3553 | Down | 8.99E-20  | 3.97E-19  |
| Unigene116493 | Potri.015G038400.1 | 0.4648  | 9.5143   | -4.3554 | Down | 8.99E-20  | 3.97E-19  |
| Unigene114801 | Potri.009G012700.6 | 0.2703  | 5.5327   | -4.3554 | Down | 1.91E-10  | 5.60E-10  |
| Unigene109327 | Potri.008G145100.2 | 0.1743  | 3.5678   | -4.3554 | Down | 1.02E-05  | 2.14E-05  |
| Unigene107143 | Potri.007G100900.1 | 0.6431  | 13.1641  | -4.3554 | Down | 3.85E-52  | 3.93E-51  |
| Unigene117679 | Potri.018G127300.1 | 0.2968  | 6.0757   | -4.3555 | Down | 4.04E-15  | 1.48E-14  |
| Unigene114414 | Potri.017G131600.1 | 0.2773  | 5.6767   | -4.3555 | Down | 1.91E-10  | 5.60E-10  |
| Unigene113183 | Potri.004G101200.1 | 0.2972  | 6.0838   | -4.3555 | Down | 1.91E-10  | 5.60E-10  |
| Unigene113150 | Potri.003G077200.1 | 0.1486  | 3.0419   | -4.3555 | Down | 1.02E-05  | 2.14E-05  |
| Unigene97543  | Potri.018G039500.1 | 0.1793  | 3.6708   | -4.3556 | Down | 1.02E-05  | 2.14E-05  |
| Unigene118307 | Potri.012G144000.1 | 0.1751  | 3.5846   | -4.3556 | Down | 1.91E-10  | 5.60E-10  |
| Unigene118905 | Potri.011G065200.1 | 0.3593  | 7.3557   | -4.3556 | Down | 2.06E-24  | 1.06E-23  |
| Unigene108903 | Potri.009G069900.3 | 0.1776  | 3.6358   | -4.3556 | Down | 1.02E-05  | 2.14E-05  |
| Unigene110848 | Potri.008G182200.2 | 0.1643  | 3.3635   | -4.3556 | Down | 1.02E-05  | 2.14E-05  |
| Unigene116471 | Potri.006G265700.1 | 0.2331  | 4.772    | -4.3556 | Down | 1.91E-10  | 5.60E-10  |
| Unigene110311 | Potri.002G166700.3 | 0.336   | 6.8785   | -4.3556 | Down | 1.91E-10  | 5.60E-10  |
| Unigene96433  | Potri.002G037700.1 | 0.1643  | 3.3635   | -4.3556 | Down | 1.02E-05  | 2.14E-05  |
| Unigene107929 | Potri.005G047400.1 | 0.1828  | 3.7427   | -4.3557 | Down | 1.02E-05  | 2.14E-05  |
| Unigene110047 | Potri.012G087800.3 | 0.1695  | 3.4705   | -4.3558 | Down | 1.02E-05  | 2.14E-05  |
| Unigene107778 | Potri.005G206300.3 | 0.1837  | 3.7612   | -4.3558 | Down | 1.02E-05  | 2.14E-05  |
| Unigene14649  | Potri.008G088300.2 | 12.5494 | 257.1665 | -4.357  | Down | 0         | 0         |
| Unigene83441  | Potri.001G067100.1 | 23.4335 | 480.2804 | -4.3572 | Down | 0         | 0         |
| Unigene10492  | Potri.014G025500.1 | 0.6665  | 13.7015  | -4.3616 | Down | 3.22E-117 | 8.41E-116 |
| Unigene14319  | Potri.002G074200.1 | 1.3088  | 26.9076  | -4.3617 | Down | 4.76E-57  | 5.36E-56  |
| Unigene69632  | Potri.005G195700.1 | 5.2956  | 108.9796 | -4.3631 | Down | 0         | 0         |
| Unigene93081  | Potri.012G090500.1 | 15.1442 | 311.7375 | -4.3635 | Down | 0         | 0         |
| Unigene77415  | Potri.005G044000.1 | 1.4532  | 29.9215  | -4.3639 | Down | 3.31E-43  | 2.79E-42  |
| Unigene101439 | Potri.001G452900.1 | 0.7079  | 14.5868  | -4.365  | Down | 8.84E-76  | 1.36E-74  |
| Unigene23053  | Potri.019G085400.1 | 7.4051  | 152.8895 | -4.3678 | Down | 0         | 0         |
| Unigene15515  | Potri.001G210100.2 | 4.749   | 98.0647  | -4.368  | Down | 8.74E-225 | 5.22E-223 |
| Unigene61851  | Potri.010G189800.5 | 0.818   | 16.9201  | -4.3705 | Down | 1.04E-24  | 5.41E-24  |
| Unigene9431   | Potri.003G086000.1 | 2.8962  | 59.9469  | -4.3715 | Down | 1.67E-155 | 6.26E-154 |
| Unigene45648  | Potri.011G066900.4 | 1.7866  | 37.0427  | -4.3739 | Down | 1.45E-230 | 8.95E-229 |
| Unigene48205  | Potri.001G122800.1 | 0.7105  | 14.7346  | -4.3742 | Down | 4.55E-20  | 2.03E-19  |

|               |                     |         |          |         |      |           |           |
|---------------|---------------------|---------|----------|---------|------|-----------|-----------|
| Unigene116341 | Potri.010G223200.1  | 1.4164  | 29.3759  | -4.3743 | Down | 1.22E-57  | 1.39E-56  |
| Unigene27223  | Potri.014G026700.1  | 3.2863  | 68.3326  | -4.378  | Down | 2.20E-95  | 4.42E-94  |
| Unigene9119   | Potri.001G124200.1  | 1.6663  | 34.6615  | -4.3786 | Down | 1.51E-62  | 1.88E-61  |
| Unigene88638  | Potri.003G006000.1  | 3.7632  | 78.3433  | -4.3798 | Down | 2.75E-161 | 1.08E-159 |
| Unigene101101 | Potri.009G001500.2  | 0.3913  | 8.1494   | -4.3803 | Down | 2.04E-15  | 7.58E-15  |
| Unigene103190 | Potri.017G141000.1  | 0.3508  | 7.3064   | -4.3804 | Down | 2.04E-15  | 7.58E-15  |
| Unigene98618  | Potri.014G107300.2  | 0.4702  | 9.793    | -4.3804 | Down | 2.04E-15  | 7.58E-15  |
| Unigene116180 | Potri.005G050500.1  | 0.361   | 7.5185   | -4.3804 | Down | 2.04E-15  | 7.58E-15  |
| Unigene118199 | Potri.002G227700.1  | 0.5393  | 11.2325  | -4.3804 | Down | 1.23E-29  | 7.40E-29  |
| Unigene37561  | Potri.009G104600.1  | 0.6022  | 12.5705  | -4.3837 | Down | 5.80E-77  | 9.10E-76  |
| Unigene93115  | Potri.008G106700.1  | 12.9435 | 271.1002 | -4.3885 | Down | 0         | 0         |
| Unigene78017  | Potri.005G084500.1  | 1.4346  | 30.053   | -4.3888 | Down | 4.29E-44  | 3.69E-43  |
| Unigene106151 | Potri.004G137600.2  | 0.1571  | 3.2994   | -4.3924 | Down | 9.66E-11  | 2.88E-10  |
| Unigene103001 | Potri.018G021300.2  | 0.2512  | 5.2768   | -4.3928 | Down | 9.66E-11  | 2.88E-10  |
| Unigene114926 | Potri.017G138600.1  | 0.2674  | 5.6173   | -4.3928 | Down | 9.66E-11  | 2.88E-10  |
| Unigene103784 | Potri.013G144100.1  | 0.9903  | 20.8038  | -4.3928 | Down | 1.58E-58  | 1.83E-57  |
| Unigene97326  | Potri.010G114400.3  | 0.5348  | 11.2346  | -4.3928 | Down | 2.30E-20  | 1.04E-19  |
| Unigene116411 | Potri.001G215000.1  | 0.2346  | 4.9284   | -4.3928 | Down | 9.66E-11  | 2.88E-10  |
| Unigene116646 | Potri.015G096500.1  | 0.9125  | 19.1709  | -4.3929 | Down | 1.78E-39  | 1.38E-38  |
| Unigene27524  | Potri.010G235700.1  | 1.5957  | 33.5235  | -4.3929 | Down | 1.48E-77  | 2.35E-76  |
| Unigene116072 | Potri.009G168300.1  | 0.243   | 5.105    | -4.3929 | Down | 9.66E-11  | 2.88E-10  |
| Unigene118822 | Potri.009G005200.1  | 0.299   | 6.2815   | -4.3929 | Down | 2.30E-20  | 1.04E-19  |
| Unigene101881 | Potri.007G124300.3  | 0.1842  | 3.8697   | -4.3929 | Down | 9.66E-11  | 2.88E-10  |
| Unigene98603  | Potri.001G010500.2  | 0.5851  | 12.2919  | -4.3929 | Down | 2.30E-20  | 1.04E-19  |
| Unigene117601 | Potri.015G033100.1  | 1.4037  | 29.4908  | -4.393  | Down | 4.82E-68  | 6.57E-67  |
| Unigene15524  | Potri.014G083900.1  | 0.2207  | 4.6368   | -4.393  | Down | 9.66E-11  | 2.88E-10  |
| Unigene118396 | Potri.003G183100.1  | 0.1707  | 3.5863   | -4.393  | Down | 9.66E-11  | 2.88E-10  |
| Unigene115265 | Potri.004G133500.13 | 0.2608  | 5.4798   | -4.3931 | Down | 9.66E-11  | 2.88E-10  |
| Unigene112298 | Potri.002G197300.1  | 0.3095  | 6.503    | -4.3931 | Down | 9.66E-11  | 2.88E-10  |
| Unigene115697 | Potri.002G004500.2  | 0.252   | 5.2947   | -4.3931 | Down | 9.66E-11  | 2.88E-10  |
| Unigene36053  | Potri.001G079600.1  | 17.2311 | 362.2633 | -4.394  | Down | 0         | 0         |
| Unigene102412 | Potri.003G167800.1  | 1.2229  | 25.7654  | -4.3971 | Down | 2.33E-87  | 4.23E-86  |
| Unigene102830 | Potri.010G112200.6  | 1.0042  | 21.1745  | -4.3982 | Down | 7.45E-35  | 5.14E-34  |
| Unigene2029   | Potri.011G164200.1  | 5.3285  | 112.3922 | -4.3987 | Down | 0         | 0         |
| Unigene21605  | Potri.T079300.1     | 7.6752  | 161.9761 | -4.3994 | Down | 0         | 0         |
| Unigene101378 | Potri.008G129200.1  | 0.7229  | 15.2641  | -4.4002 | Down | 2.66E-25  | 1.41E-24  |
| Unigene37639  | Potri.001G167900.1  | 0.6544  | 13.8181  | -4.4002 | Down | 2.66E-25  | 1.41E-24  |
| Unigene25806  | Potri.013G047900.2  | 1.1269  | 23.7955  | -4.4003 | Down | 2.66E-49  | 2.56E-48  |
| Unigene103369 | Potri.T043300.1     | 0.6544  | 13.8289  | -4.4014 | Down | 9.91E-64  | 1.26E-62  |

|               |                    |         |          |         |      |           |           |
|---------------|--------------------|---------|----------|---------|------|-----------|-----------|
| Unigene3581   | Potri.008G152300.2 | 1.2433  | 26.2878  | -4.4021 | Down | 9.00E-40  | 7.02E-39  |
| Unigene4996   | Potri.006G195300.1 | 0.4049  | 8.5605   | -4.4021 | Down | 9.00E-40  | 7.02E-39  |
| Unigene105446 | Potri.018G031100.1 | 0.6731  | 14.2483  | -4.4038 | Down | 4.76E-83  | 8.12E-82  |
| Unigene102669 | Potri.003G091900.1 | 0.511   | 10.8262  | -4.4051 | Down | 3.15E-30  | 1.92E-29  |
| Unigene101762 | Potri.T161800.1    | 0.788   | 16.6967  | -4.4052 | Down | 3.15E-30  | 1.92E-29  |
| Unigene4810   | Potri.010G046300.1 | 2.5851  | 54.7739  | -4.4052 | Down | 2.35E-102 | 5.17E-101 |
| Unigene117393 | Potri.006G213900.3 | 0.3117  | 6.6043   | -4.4052 | Down | 1.03E-15  | 3.88E-15  |
| Unigene105536 | Potri.018G021400.2 | 0.252   | 5.3399   | -4.4053 | Down | 1.03E-15  | 3.88E-15  |
| Unigene38967  | Potri.003G167800.1 | 3.8061  | 80.6633  | -4.4055 | Down | 0         | 0         |
| Unigene118067 | Potri.001G052300.1 | 0.7386  | 15.716   | -4.4113 | Down | 4.55E-40  | 3.57E-39  |
| Unigene104788 | Potri.002G169100.2 | 0.4054  | 8.6267   | -4.4114 | Down | 1.16E-20  | 5.29E-20  |
| Unigene25829  | Potri.019G057500.4 | 10.2038 | 217.3696 | -4.413  | Down | 0         | 0         |
| Unigene117722 | Potri.016G132600.1 | 0.4921  | 10.4969  | -4.4149 | Down | 1.35E-25  | 7.17E-25  |
| Unigene47384  | Potri.014G060500.1 | 3.1263  | 66.7818  | -4.4169 | Down | 3.92E-142 | 1.31E-140 |
| Unigene119462 | Potri.009G111100.6 | 0.318   | 6.8036   | -4.4192 | Down | 1.90E-35  | 1.33E-34  |
| Unigene107112 | Potri.013G083600.1 | 0.5524  | 11.8708  | -4.4256 | Down | 2.47E-94  | 4.91E-93  |
| Unigene20610  | Potri.018G009200.1 | 1.7411  | 37.4437  | -4.4267 | Down | 1.26E-128 | 3.68E-127 |
| Unigene76203  | Potri.001G124200.1 | 5.4706  | 117.698  | -4.4272 | Down | 6.65E-163 | 2.66E-161 |
| Unigene107650 | Potri.016G121400.2 | 0.1847  | 3.9787   | -4.429  | Down | 5.11E-06  | 1.11E-05  |
| Unigene117651 | Potri.016G061500.4 | 0.1995  | 4.2979   | -4.4292 | Down | 4.87E-11  | 1.47E-10  |
| Unigene95229  | Potri.010G091700.1 | 0.2784  | 5.9978   | -4.4292 | Down | 5.21E-16  | 1.98E-15  |
| Unigene98503  | Potri.006G131400.1 | 0.1658  | 3.572    | -4.4292 | Down | 5.11E-06  | 1.11E-05  |
| Unigene111037 | Potri.005G114800.1 | 0.1629  | 3.5096   | -4.4292 | Down | 5.11E-06  | 1.11E-05  |
| Unigene111477 | Potri.015G146000.1 | 0.1601  | 3.4494   | -4.4293 | Down | 5.11E-06  | 1.11E-05  |
| Unigene114498 | Potri.013G003500.2 | 0.2753  | 5.9314   | -4.4293 | Down | 4.87E-11  | 1.47E-10  |
| Unigene116283 | Potri.007G019500.5 | 0.2376  | 5.1191   | -4.4293 | Down | 4.87E-11  | 1.47E-10  |
| Unigene100661 | Potri.011G165200.1 | 0.2698  | 5.8134   | -4.4294 | Down | 5.86E-21  | 2.69E-20  |
| Unigene101900 | Potri.008G058600.1 | 0.1865  | 4.0185   | -4.4294 | Down | 5.11E-06  | 1.11E-05  |
| Unigene111589 | Potri.007G037700.4 | 0.1594  | 3.4346   | -4.4294 | Down | 5.11E-06  | 1.11E-05  |
| Unigene95739  | Potri.005G027800.2 | 0.1908  | 4.111    | -4.4294 | Down | 4.87E-11  | 1.47E-10  |
| Unigene109798 | Potri.002G261700.1 | 0.1711  | 3.6867   | -4.4294 | Down | 5.11E-06  | 1.11E-05  |
| Unigene114909 | Potri.009G116200.2 | 0.4025  | 8.6731   | -4.4295 | Down | 5.21E-16  | 1.98E-15  |
| Unigene101968 | Potri.005G069100.1 | 0.7803  | 16.8139  | -4.4295 | Down | 6.80E-26  | 3.65E-25  |
| Unigene109979 | Potri.017G076100.2 | 0.1703  | 3.6699   | -4.4296 | Down | 5.11E-06  | 1.11E-05  |
| Unigene99681  | Potri.012G141800.1 | 0.3409  | 7.3465   | -4.4296 | Down | 6.80E-26  | 3.65E-25  |
| Unigene104414 | Potri.012G088700.4 | 0.4419  | 9.5226   | -4.4296 | Down | 1.73E-50  | 1.71E-49  |
| Unigene66749  | Potri.010G086700.1 | 0.2181  | 4.7      | -4.4296 | Down | 4.87E-11  | 1.47E-10  |
| Unigene111971 | Potri.010G030500.1 | 0.1567  | 3.3769   | -4.4296 | Down | 5.11E-06  | 1.11E-05  |
| Unigene98652  | Potri.004G230300.1 | 0.518   | 11.1626  | -4.4296 | Down | 5.21E-16  | 1.98E-15  |

|               |                    |         |          |         |      |           |           |
|---------------|--------------------|---------|----------|---------|------|-----------|-----------|
| Unigene105999 | Potri.003G183100.1 | 0.3372  | 7.2668   | -4.4296 | Down | 6.80E-26  | 3.65E-25  |
| Unigene111698 | Potri.002G229900.1 | 0.1587  | 3.42     | -4.4296 | Down | 5.11E-06  | 1.11E-05  |
| Unigene61976  | Potri.001G060400.1 | 3.3022  | 71.2337  | -4.4311 | Down | 2.42E-217 | 1.39E-215 |
| Unigene96820  | Potri.019G118100.1 | 0.5701  | 12.3174  | -4.4333 | Down | 6.31E-95  | 1.26E-93  |
| Unigene27298  | Potri.008G152300.2 | 1.0563  | 22.8309  | -4.4339 | Down | 3.20E-80  | 5.27E-79  |
| Unigene101594 | Potri.005G004400.1 | 0.5018  | 10.8722  | -4.4374 | Down | 7.14E-46  | 6.39E-45  |
| Unigene50520  | Potri.010G086000.1 | 1.5722  | 34.1691  | -4.4418 | Down | 4.26E-145 | 1.46E-143 |
| Unigene38315  | Potri.004G097000.1 | 2.621   | 57.0558  | -4.4442 | Down | 6.05E-195 | 3.06E-193 |
| Unigene20553  | Potri.008G074300.3 | 1.4009  | 30.5005  | -4.4444 | Down | 1.31E-120 | 3.55E-119 |
| Unigene106965 | Potri.001G083700.1 | 0.3117  | 6.7908   | -4.4454 | Down | 3.61E-46  | 3.25E-45  |
| Unigene105153 | Potri.006G047500.1 | 1.0946  | 23.8571  | -4.4459 | Down | 4.21E-66  | 5.58E-65  |
| Unigene105327 | Potri.001G040900.1 | 0.2618  | 5.7105   | -4.4471 | Down | 2.96E-21  | 1.37E-20  |
| Unigene114894 | Potri.001G122800.2 | 0.5367  | 11.7086  | -4.4473 | Down | 2.96E-21  | 1.37E-20  |
| Unigene107174 | Potri.008G122100.1 | 0.222   | 4.8438   | -4.4475 | Down | 2.96E-21  | 1.37E-20  |
| Unigene103996 | Potri.001G181200.2 | 0.2703  | 5.921    | -4.4532 | Down | 2.63E-16  | 1.01E-15  |
| Unigene105020 | Potri.016G108700.1 | 0.2804  | 6.1436   | -4.4535 | Down | 2.63E-16  | 1.01E-15  |
| Unigene19398  | Potri.011G150400.1 | 4.1894  | 91.8727  | -4.4548 | Down | 0         | 0         |
| Unigene64461  | Potri.010G155500.1 | 1.7442  | 38.306   | -4.4569 | Down | 1.07E-66  | 1.43E-65  |
| Unigene36408  | Potri.T098100.2    | 0.2847  | 6.2578   | -4.4581 | Down | 1.73E-26  | 9.48E-26  |
| Unigene41232  | Potri.006G204400.1 | 0.6724  | 14.7871  | -4.4589 | Down | 6.65E-87  | 1.20E-85  |
| Unigene38764  | Potri.003G157300.2 | 0.8758  | 19.26    | -4.4589 | Down | 6.65E-87  | 1.20E-85  |
| Unigene101681 | Potri.008G129800.1 | 0.8857  | 19.5094  | -4.4612 | Down | 9.19E-47  | 8.39E-46  |
| Unigene20679  | Potri.014G037900.1 | 1.1962  | 26.3606  | -4.4619 | Down | 7.00E-57  | 7.86E-56  |
| Unigene31246  | Potri.003G134600.1 | 0.667   | 14.7033  | -4.4623 | Down | 5.42E-67  | 7.28E-66  |
| Unigene101208 | Potri.018G077200.1 | 0.1584  | 3.4981   | -4.4649 | Down | 2.45E-11  | 7.54E-11  |
| Unigene102531 | Potri.010G095500.1 | 0.2254  | 4.9776   | -4.4649 | Down | 2.45E-11  | 7.54E-11  |
| Unigene15622  | Potri.017G095600.1 | 1.1052  | 24.4088  | -4.465  | Down | 7.54E-42  | 6.18E-41  |
| Unigene117388 | Potri.014G167700.1 | 0.2078  | 4.5894   | -4.465  | Down | 2.45E-11  | 7.54E-11  |
| Unigene109318 | Potri.007G097500.1 | 0.6972  | 15.3981  | -4.465  | Down | 1.49E-21  | 7.00E-21  |
| Unigene111472 | Potri.004G084000.1 | 1.2807  | 28.2849  | -4.465  | Down | 7.54E-42  | 6.18E-41  |
| Unigene107788 | Potri.001G029400.1 | 0.3675  | 8.1162   | -4.465  | Down | 2.45E-11  | 7.54E-11  |
| Unigene111570 | Potri.019G093800.1 | 0.3188  | 7.041    | -4.4651 | Down | 2.45E-11  | 7.54E-11  |
| Unigene99443  | Potri.008G174500.1 | 0.1486  | 3.2821   | -4.4651 | Down | 2.45E-11  | 7.54E-11  |
| Unigene47276  | Potri.005G232600.1 | 0.3091  | 6.827    | -4.4651 | Down | 1.03E-31  | 6.57E-31  |
| Unigene115143 | Potri.002G202600.1 | 0.2636  | 5.8219   | -4.4651 | Down | 2.45E-11  | 7.54E-11  |
| Unigene111981 | Potri.017G007200.1 | 0.3134  | 6.9227   | -4.4653 | Down | 2.45E-11  | 7.54E-11  |
| Unigene89321  | Potri.002G180800.5 | 31.6993 | 701.2489 | -4.4674 | Down | 0         | 0         |
| Unigene102005 | Potri.010G236800.1 | 1.2108  | 26.7901  | -4.4677 | Down | 6.88E-209 | 3.76E-207 |
| Unigene100141 | Potri.017G015700.1 | 0.5456  | 12.0769  | -4.4683 | Down | 3.53E-57  | 3.99E-56  |

|               |                    |         |          |         |      |           |           |
|---------------|--------------------|---------|----------|---------|------|-----------|-----------|
| Unigene103478 | Potri.001G031800.3 | 0.9582  | 21.2355  | -4.47   | Down | 1.72E-72  | 2.51E-71  |
| Unigene46536  | Potri.019G054800.3 | 5.4737  | 121.3138 | -4.4701 | Down | 0         | 0         |
| Unigene117800 | Potri.002G161600.1 | 0.6799  | 15.0695  | -4.4702 | Down | 6.24E-37  | 4.55E-36  |
| Unigene2790   | Potri.013G115800.1 | 1.0212  | 22.6404  | -4.4706 | Down | 6.80E-98  | 1.42E-96  |
| Unigene22167  | Potri.002G039100.1 | 6.751   | 149.7854 | -4.4717 | Down | 0         | 0         |
| Unigene20944  | Potri.013G115800.1 | 1.4937  | 33.1505  | -4.4721 | Down | 3.19E-179 | 1.44E-177 |
| Unigene94942  | Potri.007G045100.1 | 0.7826  | 17.3692  | -4.4721 | Down | 2.61E-255 | 1.85E-253 |
| Unigene29786  | Potri.006G129800.1 | 1.0906  | 24.2051  | -4.4721 | Down | 2.87E-52  | 2.93E-51  |
| Unigene107558 | Potri.T172000.4    | 0.9278  | 20.5924  | -4.4722 | Down | 8.73E-27  | 4.83E-26  |
| Unigene45824  | Potri.003G181600.1 | 4.4971  | 99.893   | -4.4733 | Down | 2.51E-174 | 1.09E-172 |
| Unigene36234  | Potri.006G086100.1 | 1.2671  | 28.1552  | -4.4738 | Down | 6.82E-83  | 1.16E-81  |
| Unigene106901 | Potri.011G144300.1 | 0.6774  | 15.0816  | -4.4766 | Down | 5.46E-78  | 8.68E-77  |
| Unigene108214 | Potri.010G109400.1 | 0.5432  | 12.0946  | -4.4767 | Down | 1.32E-16  | 5.17E-16  |
| Unigene51823  | Potri.009G123000.1 | 0.4337  | 9.6569   | -4.4768 | Down | 1.11E-62  | 1.38E-61  |
| Unigene119155 | Potri.004G033600.3 | 0.1868  | 4.1594   | -4.4768 | Down | 1.32E-16  | 5.17E-16  |
| Unigene85802  | Potri.004G234100.1 | 23.2963 | 519.2532 | -4.4783 | Down | 0         | 0         |
| Unigene119419 | Potri.013G127100.2 | 0.6363  | 14.1861  | -4.4786 | Down | 6.96E-68  | 9.47E-67  |
| Unigene112547 | Potri.013G147700.1 | 1.5287  | 34.0915  | -4.479  | Down | 1.45E-52  | 1.49E-51  |
| Unigene14480  | Potri.009G113600.1 | 1.052   | 23.4929  | -4.481  | Down | 8.99E-58  | 1.03E-56  |
| Unigene101330 | Potri.016G035800.1 | 0.2738  | 6.1199   | -4.4823 | Down | 7.52E-22  | 3.56E-21  |
| Unigene108672 | Potri.002G212900.1 | 0.7139  | 15.9587  | -4.4825 | Down | 7.52E-22  | 3.56E-21  |
| Unigene104147 | Potri.018G021400.1 | 0.191   | 4.2706   | -4.4828 | Down | 7.52E-22  | 3.56E-21  |
| Unigene117182 | Potri.016G092700.2 | 0.5344  | 11.975   | -4.486  | Down | 4.40E-27  | 2.45E-26  |
| Unigene51122  | Potri.001G211000.7 | 1.8995  | 42.6038  | -4.4873 | Down | 4.53E-58  | 5.20E-57  |
| Unigene5533   | Potri.008G186600.1 | 2.6502  | 59.5376  | -4.4896 | Down | 1.20E-140 | 3.94E-139 |
| Unigene24843  | Potri.015G108800.1 | 1.049   | 23.6088  | -4.4922 | Down | 5.95E-48  | 5.57E-47  |
| Unigene92683  | Potri.T113400.1    | 6.0282  | 136.1426 | -4.4972 | Down | 0         | 0         |
| Unigene101552 | Potri.002G071100.2 | 0.1342  | 3.0356   | -4.4995 | Down | 2.57E-06  | 5.71E-06  |
| Unigene116837 | Potri.001G333300.2 | 0.2234  | 5.0532   | -4.4995 | Down | 1.23E-11  | 3.85E-11  |
| Unigene114576 | Potri.T179700.1    | 0.2743  | 6.2051   | -4.4996 | Down | 1.23E-11  | 3.85E-11  |
| Unigene108256 | Potri.018G119100.1 | 0.1811  | 4.0966   | -4.4996 | Down | 2.57E-06  | 5.71E-06  |
| Unigene113482 | Potri.014G066600.1 | 0.1463  | 3.3094   | -4.4996 | Down | 2.57E-06  | 5.71E-06  |
| Unigene118441 | Potri.009G001700.3 | 0.2532  | 5.7278   | -4.4996 | Down | 6.67E-17  | 2.63E-16  |
| Unigene111142 | Potri.004G159800.2 | 0.1622  | 3.6691   | -4.4996 | Down | 2.57E-06  | 5.71E-06  |
| Unigene102539 | Potri.014G020900.1 | 0.4239  | 9.5897   | -4.4997 | Down | 2.22E-27  | 1.25E-26  |
| Unigene97247  | Potri.011G164800.1 | 0.3546  | 8.0218   | -4.4997 | Down | 2.22E-27  | 1.25E-26  |
| Unigene111931 | Potri.007G118800.2 | 0.3148  | 7.1214   | -4.4997 | Down | 1.23E-11  | 3.85E-11  |
| Unigene109472 | Potri.005G047800.1 | 0.347   | 7.8501   | -4.4997 | Down | 1.23E-11  | 3.85E-11  |
| Unigene116284 | Potri.004G234100.1 | 0.2376  | 5.3751   | -4.4997 | Down | 1.23E-11  | 3.85E-11  |

|               |                    |        |          |         |      |           |           |
|---------------|--------------------|--------|----------|---------|------|-----------|-----------|
| Unigene114799 | Potri.004G099500.3 | 0.2703 | 6.1151   | -4.4997 | Down | 1.23E-11  | 3.85E-11  |
| Unigene102024 | Potri.019G086300.1 | 0.4149 | 9.387    | -4.4998 | Down | 1.85E-53  | 1.94E-52  |
| Unigene105766 | Potri.018G114300.2 | 0.3089 | 6.9887   | -4.4998 | Down | 3.79E-22  | 1.81E-21  |
| Unigene112908 | Potri.012G101600.2 | 0.1504 | 3.4028   | -4.4998 | Down | 2.57E-06  | 5.71E-06  |
| Unigene108381 | Potri.012G080900.5 | 0.1802 | 4.0768   | -4.4998 | Down | 2.57E-06  | 5.71E-06  |
| Unigene111022 | Potri.001G150600.1 | 0.1636 | 3.7013   | -4.4998 | Down | 2.57E-06  | 5.71E-06  |
| Unigene118319 | Potri.010G154000.2 | 0.1747 | 3.9526   | -4.4999 | Down | 1.23E-11  | 3.85E-11  |
| Unigene118438 | Potri.002G146800.1 | 0.3383 | 7.6543   | -4.4999 | Down | 3.79E-22  | 1.81E-21  |
| Unigene111914 | Potri.T077600.1    | 0.4721 | 10.6821  | -4.5    | Down | 6.67E-17  | 2.64E-16  |
| Unigene65363  | Potri.T037600.1    | 0.1567 | 3.5458   | -4.5    | Down | 2.57E-06  | 5.71E-06  |
| Unigene110484 | Potri.018G149900.2 | 0.1665 | 3.7674   | -4.5    | Down | 2.57E-06  | 5.71E-06  |
| Unigene106948 | Potri.018G027300.1 | 0.2331 | 5.2743   | -4.5    | Down | 6.67E-17  | 2.64E-16  |
| Unigene112728 | Potri.016G108400.1 | 0.1516 | 3.4304   | -4.5    | Down | 2.57E-06  | 5.71E-06  |
| Unigene108858 | Potri.011G066600.1 | 0.1776 | 4.0185   | -4.5    | Down | 2.57E-06  | 5.71E-06  |
| Unigene117654 | Potri.009G138500.1 | 0.1989 | 4.5007   | -4.5    | Down | 1.23E-11  | 3.85E-11  |
| Unigene112537 | Potri.001G282100.1 | 0.3057 | 6.9171   | -4.5    | Down | 1.23E-11  | 3.85E-11  |
| Unigene101658 | Potri.001G101600.3 | 0.144  | 3.2583   | -4.5    | Down | 2.57E-06  | 5.71E-06  |
| Unigene114231 | Potri.017G037000.1 | 0.1402 | 3.1725   | -4.5001 | Down | 2.57E-06  | 5.71E-06  |
| Unigene114233 | Potri.013G069200.4 | 0.1402 | 3.1725   | -4.5001 | Down | 2.57E-06  | 5.71E-06  |
| Unigene113293 | Potri.005G025200.2 | 0.1474 | 3.3355   | -4.5001 | Down | 2.57E-06  | 5.71E-06  |
| Unigene98522  | Potri.007G145800.1 | 0.1451 | 3.2836   | -4.5002 | Down | 2.57E-06  | 5.71E-06  |
| Unigene28497  | Potri.011G142700.1 | 6.9044 | 156.3803 | -4.5014 | Down | 0         | 0         |
| Unigene32382  | Potri.016G047500.1 | 5.5051 | 124.8374 | -4.5031 | Down | 0         | 0         |
| Unigene118936 | Potri.011G057200.1 | 0.9928 | 22.5373  | -4.5047 | Down | 1.43E-74  | 2.15E-73  |
| Unigene106560 | Potri.009G010700.3 | 0.4384 | 9.9535   | -4.5049 | Down | 1.43E-74  | 2.15E-73  |
| Unigene40824  | Potri.007G119100.1 | 2.7395 | 62.2076  | -4.5051 | Down | 3.08E-137 | 9.84E-136 |
| Unigene26224  | Potri.001G161400.6 | 1.0115 | 23.0214  | -4.5084 | Down | 2.46E-43  | 2.08E-42  |
| Unigene34284  | Potri.008G166200.1 | 2.4022 | 54.6782  | -4.5085 | Down | 2.75E-289 | 2.33E-287 |
| Unigene8585   | Potri.018G141700.1 | 2.3379 | 53.2368  | -4.5091 | Down | 9.38E-117 | 2.44E-115 |
| Unigene5702   | Potri.018G109700.1 | 1.9198 | 43.731   | -4.5096 | Down | 7.18E-75  | 1.09E-73  |
| Unigene118975 | Potri.011G076400.1 | 1.4559 | 33.164   | -4.5096 | Down | 1.47E-111 | 3.62E-110 |
| Unigene64457  | Potri.014G060200.1 | 2.0198 | 46.1332  | -4.5135 | Down | 2.28E-80  | 3.76E-79  |
| Unigene106571 | Potri.004G030300.1 | 0.2027 | 4.63     | -4.5136 | Down | 1.12E-27  | 6.34E-27  |
| Unigene51064  | Potri.019G093300.1 | 0.6143 | 14.0412  | -4.5146 | Down | 3.62E-75  | 5.52E-74  |
| Unigene118519 | Potri.003G081000.2 | 0.3316 | 7.5905   | -4.5167 | Down | 1.91E-22  | 9.19E-22  |
| Unigene116038 | Potri.009G117200.2 | 0.4876 | 11.1626  | -4.5168 | Down | 1.91E-22  | 9.19E-22  |
| Unigene99859  | Potri.014G139300.1 | 0.2799 | 6.4085   | -4.517  | Down | 1.91E-22  | 9.19E-22  |
| Unigene102088 | Potri.008G118000.1 | 0.4736 | 10.8436  | -4.517  | Down | 1.91E-22  | 9.19E-22  |
| Unigene94783  | Potri.007G135400.1 | 0.7257 | 16.6526  | -4.5202 | Down | 2.96E-107 | 6.91E-106 |

|               |                     |         |          |         |      |           |           |
|---------------|---------------------|---------|----------|---------|------|-----------|-----------|
| Unigene104731 | Potri.011G018300.1  | 0.2784  | 6.3976   | -4.5223 | Down | 3.35E-17  | 1.34E-16  |
| Unigene105612 | Potri.014G194500.1  | 0.4337  | 9.9684   | -4.5226 | Down | 3.35E-33  | 2.22E-32  |
| Unigene113543 | Potri.002G053900.2  | 0.4371  | 10.0463  | -4.5226 | Down | 3.35E-17  | 1.34E-16  |
| Unigene107165 | Potri.006G008800.1  | 0.1665  | 3.8272   | -4.5227 | Down | 3.35E-17  | 1.34E-16  |
| Unigene96794  | Potri.001G405900.1  | 0.3024  | 6.951    | -4.5227 | Down | 3.35E-17  | 1.34E-16  |
| Unigene103692 | Potri.012G031100.4  | 2.8503  | 65.5458  | -4.5233 | Down | 0         | 0         |
| Unigene13538  | Potri.003G006000.1  | 7.322   | 168.5232 | -4.5246 | Down | 0         | 0         |
| Unigene115750 | Potri.013G025700.1  | 1.0047  | 23.1369  | -4.5254 | Down | 6.23E-44  | 5.34E-43  |
| Unigene8637   | Potri.004G095700.2  | 0.6875  | 15.8333  | -4.5255 | Down | 1.84E-86  | 3.29E-85  |
| Unigene115331 | Potri.014G094800.1  | 1.9495  | 44.9458  | -4.527  | Down | 2.91E-81  | 4.86E-80  |
| Unigene11709  | Potri.019G119300.2  | 6.3917  | 147.6052 | -4.5294 | Down | 0         | 0         |
| Unigene48872  | Potri.014G149700.1  | 1.5935  | 36.8152  | -4.53   | Down | 2.08E-145 | 7.15E-144 |
| Unigene5606   | Potri.006G240000.1  | 1.4105  | 32.5872  | -4.53   | Down | 1.93E-49  | 1.86E-48  |
| Unigene106439 | Potri.015G127200.1  | 0.1923  | 4.4535   | -4.5335 | Down | 6.21E-12  | 1.97E-11  |
| Unigene118867 | Potri.012G092400.1  | 0.1463  | 3.3882   | -4.5335 | Down | 6.21E-12  | 1.96E-11  |
| Unigene102812 | Potri.011G029400.1  | 0.1529  | 3.5409   | -4.5335 | Down | 6.21E-12  | 1.97E-11  |
| Unigene118369 | Potri.001G372300.1  | 0.1723  | 3.9907   | -4.5336 | Down | 6.21E-12  | 1.96E-11  |
| Unigene98829  | Potri.011G143300.2  | 0.2055  | 4.7602   | -4.5338 | Down | 6.21E-12  | 1.96E-11  |
| Unigene104137 | Potri.003G109700.1  | 0.3711  | 8.5968   | -4.5339 | Down | 9.60E-23  | 4.67E-22  |
| Unigene116177 | Potri.T078900.1     | 0.2406  | 5.5741   | -4.534  | Down | 6.21E-12  | 1.96E-11  |
| Unigene43201  | Potri.002G248500.1  | 0.9702  | 22.4851  | -4.5345 | Down | 3.82E-242 | 2.52E-240 |
| Unigene25153  | Potri.011G110200.1  | 1.0995  | 25.5144  | -4.5364 | Down | 8.25E-141 | 2.72E-139 |
| Unigene20384  | Potri.019G056400.1  | 4.3179  | 100.2651 | -4.5373 | Down | 2.03E-253 | 1.42E-251 |
| Unigene85354  | Potri.017G032900.1  | 12.1742 | 282.6918 | -4.5373 | Down | 0         | 0         |
| Unigene12711  | Potri.009G097300.2  | 1.9015  | 44.2037  | -4.539  | Down | 4.16E-141 | 1.37E-139 |
| Unigene88067  | Potri.002G180800.5  | 24.8282 | 579.234  | -4.5441 | Down | 0         | 0         |
| Unigene104920 | Potri.007G049900.1  | 0.2346  | 5.476    | -4.5448 | Down | 1.69E-17  | 6.83E-17  |
| Unigene68280  | Potri.013G150500.1  | 1.4627  | 34.1443  | -4.5449 | Down | 2.98E-66  | 3.96E-65  |
| Unigene105793 | Potri.009G124300.1  | 0.2396  | 5.5932   | -4.545  | Down | 1.69E-17  | 6.83E-17  |
| Unigene59051  | Potri.009G103500.1  | 2.6433  | 61.8599  | -4.5486 | Down | 6.05E-99  | 1.28E-97  |
| Unigene119367 | Potri.001G472500.1  | 0.2084  | 4.8828   | -4.5503 | Down | 4.83E-23  | 2.37E-22  |
| Unigene109218 | Potri.008G166200.1  | 0.7005  | 16.4137  | -4.5504 | Down | 4.83E-23  | 2.37E-22  |
| Unigene96271  | Potri.012G140200.1  | 0.5253  | 12.326   | -4.5524 | Down | 2.46E-50  | 2.42E-49  |
| Unigene113577 | Potri.005G241500.1  | 0.7285  | 17.1101  | -4.5538 | Down | 1.42E-28  | 8.29E-28  |
| Unigene26512  | Potri.T123700.1     | 1.9558  | 45.9797  | -4.5552 | Down | 7.02E-154 | 2.60E-152 |
| Unigene48675  | Potri.001G211000.7  | 4.9818  | 117.3903 | -4.5585 | Down | 2.83E-214 | 1.59E-212 |
| Unigene96412  | Potri.010G009600.1  | 0.8651  | 20.3941  | -4.5591 | Down | 2.42E-94  | 4.80E-93  |
| Unigene59305  | Potri.012G044900.10 | 1.227   | 28.9492  | -4.5603 | Down | 3.86E-56  | 4.27E-55  |
| Unigene34224  | Potri.017G097800.1  | 2.0993  | 49.5477  | -4.5608 | Down | 1.57E-236 | 1.00E-234 |



|               |                    |         |          |         |      |           |           |
|---------------|--------------------|---------|----------|---------|------|-----------|-----------|
| Unigene76539  | Potri.005G195600.1 | 11.2229 | 265.2935 | -4.5631 | Down | 0         | 0         |
| Unigene638    | Potri.018G009200.1 | 0.8335  | 19.706   | -4.5633 | Down | 1.06E-198 | 5.49E-197 |
| Unigene44617  | Potri.003G101800.1 | 1.7715  | 41.8817  | -4.5633 | Down | 3.88E-100 | 8.33E-99  |
| Unigene21566  | Potri.010G126300.1 | 4.1658  | 98.5722  | -4.5645 | Down | 0         | 0         |
| Unigene114110 | Potri.017G063900.1 | 0.1408  | 3.3361   | -4.5664 | Down | 1.29E-06  | 2.93E-06  |
| Unigene106768 | Potri.012G144000.1 | 0.2164  | 5.128    | -4.5666 | Down | 7.16E-29  | 4.21E-28  |
| Unigene112104 | Potri.010G063900.1 | 0.1561  | 3.6991   | -4.5666 | Down | 1.29E-06  | 2.93E-06  |
| Unigene115239 | Potri.017G086000.1 | 0.1309  | 3.102    | -4.5667 | Down | 1.29E-06  | 2.93E-06  |
| Unigene115541 | Potri.010G093900.3 | 0.1282  | 3.0381   | -4.5667 | Down | 1.29E-06  | 2.93E-06  |
| Unigene109034 | Potri.005G243600.1 | 0.1768  | 4.1899   | -4.5667 | Down | 1.29E-06  | 2.93E-06  |
| Unigene119503 | Potri.016G025500.5 | 0.1584  | 3.754    | -4.5668 | Down | 2.43E-23  | 1.21E-22  |
| Unigene119505 | Potri.005G229800.1 | 0.4702  | 11.1438  | -4.5668 | Down | 1.91E-67  | 2.58E-66  |
| Unigene108366 | Potri.014G136300.1 | 0.1802  | 4.2709   | -4.5669 | Down | 1.29E-06  | 2.93E-06  |
| Unigene113520 | Potri.014G096600.1 | 0.1457  | 3.4534   | -4.5669 | Down | 1.29E-06  | 2.93E-06  |
| Unigene112974 | Potri.002G081300.1 | 0.1504  | 3.5648   | -4.5669 | Down | 1.29E-06  | 2.93E-06  |
| Unigene107168 | Potri.001G114000.2 | 0.1711  | 4.0554   | -4.5669 | Down | 8.48E-18  | 3.47E-17  |
| Unigene113068 | Potri.001G004100.1 | 0.1492  | 3.5363   | -4.5669 | Down | 1.29E-06  | 2.93E-06  |
| Unigene109153 | Potri.003G195700.1 | 0.5278  | 12.5105  | -4.567  | Down | 8.48E-18  | 3.47E-17  |
| Unigene104891 | Potri.001G301800.1 | 0.1483  | 3.5152   | -4.567  | Down | 3.12E-12  | 1.00E-11  |
| Unigene115857 | Potri.007G068400.1 | 0.2478  | 5.8742   | -4.5671 | Down | 3.12E-12  | 1.00E-11  |
| Unigene119060 | Potri.001G231200.1 | 0.2645  | 6.27     | -4.5671 | Down | 2.43E-23  | 1.21E-22  |
| Unigene117284 | Potri.003G096500.1 | 0.2107  | 4.9948   | -4.5672 | Down | 3.12E-12  | 1.00E-11  |
| Unigene98711  | Potri.001G038100.2 | 0.3032  | 7.1876   | -4.5672 | Down | 3.12E-12  | 1.00E-11  |
| Unigene119385 | Potri.014G021300.1 | 0.2049  | 4.8576   | -4.5673 | Down | 2.43E-23  | 1.21E-22  |
| Unigene102907 | Potri.004G120500.1 | 0.6483  | 15.4129  | -4.5713 | Down | 3.04E-84  | 5.29E-83  |
| Unigene24456  | Potri.015G068200.1 | 3.9986  | 95.1117  | -4.5721 | Down | 0         | 0         |
| Unigene68128  | Potri.006G065500.1 | 3.9481  | 94.0267  | -4.5738 | Down | 0         | 0         |
| Unigene44683  | Potri.003G207200.2 | 5.8811  | 140.0741 | -4.574  | Down | 0         | 0         |
| Unigene87025  | Potri.T177600.1    | 16.484  | 392.9076 | -4.5751 | Down | 0         | 0         |
| Unigene117437 | Potri.016G031400.1 | 0.8243  | 19.6486  | -4.5751 | Down | 1.01E-45  | 9.02E-45  |
| Unigene84850  | Potri.005G195600.1 | 10.846  | 259.0663 | -4.5781 | Down | 0         | 0         |
| Unigene30850  | Potri.002G248500.1 | 1.6537  | 39.5913  | -4.5814 | Down | 1.25E-101 | 2.73E-100 |
| Unigene113915 | Potri.014G111400.3 | 0.5716  | 13.703   | -4.5833 | Down | 1.22E-23  | 6.12E-23  |
| Unigene119059 | Potri.009G087500.1 | 0.265   | 6.3525   | -4.5833 | Down | 1.22E-23  | 6.12E-23  |
| Unigene119485 | Potri.001G195000.1 | 0.6394  | 15.3393  | -4.5844 | Down | 3.87E-85  | 6.81E-84  |
| Unigene25608  | Potri.T092300.1    | 2.7172  | 65.2012  | -4.5847 | Down | 1.64E-185 | 7.79E-184 |
| Unigene32944  | Potri.015G012000.2 | 0.5351  | 12.8496  | -4.5858 | Down | 1.57E-174 | 6.84E-173 |
| Unigene88545  | Potri.007G015200.7 | 5.1217  | 123.1946 | -4.5882 | Down | 1.15E-258 | 8.31E-257 |
| Unigene119097 | Potri.007G080600.5 | 1.1676  | 28.0947  | -4.5887 | Down | 3.16E-102 | 6.95E-101 |

|               |                    |         |          |         |      |           |           |
|---------------|--------------------|---------|----------|---------|------|-----------|-----------|
| Unigene106422 | Potri.009G154600.1 | 0.1906  | 4.5867   | -4.5888 | Down | 4.26E-18  | 1.77E-17  |
| Unigene25400  | Potri.001G399600.8 | 1.327   | 32.0234  | -4.5929 | Down | 0         | 0         |
| Unigene115367 | Potri.004G057700.2 | 1.2951  | 31.2552  | -4.593  | Down | 1.24E-57  | 1.41E-56  |
| Unigene42213  | Potri.009G169900.2 | 3.9698  | 95.8742  | -4.594  | Down | 3.90E-271 | 3.00E-269 |
| Unigene69056  | Potri.006G142600.1 | 15.7531 | 380.8617 | -4.5956 | Down | 0         | 0         |
| Unigene109041 | Potri.012G043200.1 | 0.3536  | 8.5703   | -4.5992 | Down | 1.57E-12  | 5.10E-12  |
| Unigene86740  | Potri.001G221400.1 | 29.2282 | 708.4454 | -4.5992 | Down | 0         | 0         |
| Unigene119255 | Potri.014G145800.1 | 0.3459  | 8.3849   | -4.5994 | Down | 2.73E-35  | 1.91E-34  |
| Unigene14552  | Potri.003G106400.1 | 0.5445  | 13.1995  | -4.5994 | Down | 1.29E-46  | 1.17E-45  |
| Unigene104217 | Potri.014G068500.1 | 0.333   | 8.0729   | -4.5995 | Down | 1.57E-12  | 5.10E-12  |
| Unigene104935 | Potri.012G081300.1 | 0.1703  | 4.1286   | -4.5995 | Down | 1.57E-12  | 5.10E-12  |
| Unigene112105 | Potri.001G255400.1 | 0.3121  | 7.5663   | -4.5995 | Down | 1.57E-12  | 5.10E-12  |
| Unigene105801 | Potri.010G102400.1 | 0.1402  | 3.3991   | -4.5996 | Down | 1.57E-12  | 5.10E-12  |
| Unigene68376  | Potri.012G031100.1 | 10.2343 | 248.2848 | -4.6005 | Down | 0         | 0         |
| Unigene106490 | Potri.018G134800.1 | 0.3857  | 9.3785   | -4.6038 | Down | 4.18E-41  | 3.37E-40  |
| Unigene103906 | Potri.T021100.1    | 0.603   | 14.6634  | -4.6039 | Down | 4.18E-41  | 3.37E-40  |
| Unigene94464  | Potri.003G072800.1 | 27.15   | 661.2448 | -4.6062 | Down | 0         | 0         |
| Unigene29962  | Potri.015G004600.1 | 0.9172  | 22.3983  | -4.61   | Down | 1.37E-35  | 9.65E-35  |
| Unigene100792 | Potri.010G093900.1 | 0.3705  | 9.0483   | -4.6101 | Down | 2.14E-18  | 8.97E-18  |
| Unigene94948  | Potri.003G183200.1 | 0.2274  | 5.5541   | -4.6102 | Down | 2.14E-18  | 8.97E-18  |
| Unigene3972   | Potri.003G193800.5 | 3.8854  | 94.9375  | -4.6108 | Down | 5.70E-144 | 1.93E-142 |
| Unigene36479  | Potri.008G003000.2 | 0.3323  | 8.1444   | -4.6153 | Down | 3.08E-24  | 1.57E-23  |
| Unigene27459  | Potri.017G097800.1 | 0.4388  | 10.7555  | -4.6154 | Down | 3.08E-24  | 1.57E-23  |
| Unigene110741 | Potri.016G016800.1 | 1.8155  | 44.6305  | -4.6196 | Down | 1.25E-64  | 1.61E-63  |
| Unigene99501  | Potri.001G301400.1 | 0.5363  | 13.1849  | -4.6197 | Down | 1.25E-64  | 1.61E-63  |
| Unigene101355 | Potri.002G012500.2 | 0.7314  | 17.9914  | -4.6205 | Down | 6.89E-36  | 4.89E-35  |
| Unigene15913  | Potri.010G128600.1 | 0.6766  | 16.6755  | -4.6233 | Down | 1.63E-47  | 1.51E-46  |
| Unigene99976  | Potri.009G151500.2 | 0.1291  | 3.1981   | -4.6307 | Down | 6.45E-07  | 1.50E-06  |
| Unigene113692 | Potri.017G068600.5 | 0.1446  | 3.5824   | -4.6308 | Down | 6.45E-07  | 1.50E-06  |
| Unigene108760 | Potri.017G018300.1 | 0.1785  | 4.4223   | -4.6308 | Down | 6.45E-07  | 1.50E-06  |
| Unigene100974 | Potri.016G092700.1 | 0.2908  | 7.2047   | -4.6308 | Down | 5.29E-42  | 4.35E-41  |
| Unigene113365 | Potri.018G141500.1 | 0.2949  | 7.3064   | -4.6309 | Down | 7.85E-13  | 2.59E-12  |
| Unigene111080 | Potri.005G102600.1 | 0.1629  | 4.0361   | -4.6309 | Down | 6.45E-07  | 1.50E-06  |
| Unigene101076 | Potri.002G014200.1 | 0.1532  | 3.7957   | -4.6309 | Down | 7.85E-13  | 2.59E-12  |
| Unigene118498 | Potri.008G160000.1 | 0.1669  | 4.1354   | -4.631  | Down | 7.85E-13  | 2.59E-12  |
| Unigene96883  | Potri.006G039500.1 | 0.1397  | 3.4616   | -4.631  | Down | 6.45E-07  | 1.50E-06  |
| Unigene96090  | Potri.004G182800.4 | 0.1636  | 4.0538   | -4.631  | Down | 6.45E-07  | 1.50E-06  |
| Unigene108393 | Potri.002G052900.2 | 0.3604  | 8.93     | -4.631  | Down | 7.85E-13  | 2.59E-12  |
| Unigene16305  | Potri.001G348100.1 | 0.8988  | 22.2713  | -4.631  | Down | 3.46E-36  | 2.47E-35  |

|               |                    |         |          |         |      |           |           |
|---------------|--------------------|---------|----------|---------|------|-----------|-----------|
| Unigene114276 | Potri.017G110600.1 | 0.2794  | 6.9233   | -4.6311 | Down | 7.85E-13  | 2.59E-12  |
| Unigene103454 | Potri.015G094500.1 | 0.1711  | 4.2397   | -4.6311 | Down | 6.45E-07  | 1.50E-06  |
| Unigene118312 | Potri.008G060900.8 | 0.3494  | 8.6582   | -4.6311 | Down | 1.54E-24  | 7.97E-24  |
| Unigene115928 | Potri.002G211700.1 | 0.2462  | 6.1007   | -4.6311 | Down | 7.85E-13  | 2.59E-12  |
| Unigene102208 | Potri.002G138200.1 | 0.2636  | 6.5319   | -4.6311 | Down | 7.85E-13  | 2.59E-12  |
| Unigene115429 | Potri.002G065300.1 | 1.4197  | 35.1794  | -4.6311 | Down | 3.14E-65  | 4.09E-64  |
| Unigene104227 | Potri.001G467300.1 | 0.2078  | 5.1491   | -4.6311 | Down | 7.85E-13  | 2.59E-12  |
| Unigene3781   | Potri.017G088700.1 | 0.2572  | 6.3742   | -4.6313 | Down | 7.85E-13  | 2.59E-12  |
| Unigene108499 | Potri.009G125400.1 | 0.1793  | 4.4436   | -4.6313 | Down | 6.45E-07  | 1.50E-06  |
| Unigene106174 | Potri.001G455200.2 | 0.2119  | 5.2515   | -4.6313 | Down | 2.29E-30  | 1.40E-29  |
| Unigene98335  | Potri.005G112700.1 | 0.1366  | 3.3856   | -4.6314 | Down | 6.45E-07  | 1.50E-06  |
| Unigene6178   | Potri.001G124200.1 | 2.2171  | 55.079   | -4.6348 | Down | 2.56E-100 | 5.51E-99  |
| Unigene48361  | Potri.003G013200.2 | 5.8593  | 145.5751 | -4.6349 | Down | 0         | 0         |
| Unigene92132  | Potri.010G112200.9 | 13.3854 | 332.9129 | -4.6364 | Down | 0         | 0         |
| Unigene80355  | Potri.003G207200.3 | 9.9265  | 247.2686 | -4.6387 | Down | 0         | 0         |
| Unigene15637  | Potri.009G098500.1 | 1.7282  | 43.1332  | -4.6415 | Down | 1.25E-71  | 1.80E-70  |
| Unigene105758 | Potri.005G166400.1 | 0.788   | 19.6681  | -4.6415 | Down | 1.74E-36  | 1.25E-35  |
| Unigene4977   | Potri.016G047500.5 | 0.797   | 19.9209  | -4.6436 | Down | 1.15E-30  | 7.11E-30  |
| Unigene101595 | Potri.007G063300.1 | 0.247   | 6.1742   | -4.6437 | Down | 1.15E-30  | 7.11E-30  |
| Unigene117079 | Potri.003G205900.1 | 0.5421  | 13.5508  | -4.6437 | Down | 1.15E-30  | 7.11E-30  |
| Unigene85183  | Potri.T122400.1    | 3.13    | 78.2628  | -4.6441 | Down | 4.57E-142 | 1.52E-140 |
| Unigene26479  | Potri.003G151000.1 | 22.1589 | 555.0316 | -4.6466 | Down | 0         | 0         |
| Unigene34210  | Potri.011G066900.2 | 1.5193  | 38.0573  | -4.6467 | Down | 6.75E-119 | 1.80E-117 |
| Unigene117711 | Potri.007G034500.1 | 0.3947  | 9.8868   | -4.6467 | Down | 7.75E-25  | 4.03E-24  |
| Unigene104567 | Potri.013G078200.3 | 0.3661  | 9.1711   | -4.6468 | Down | 2.06E-48  | 1.95E-47  |
| Unigene118606 | Potri.001G374200.3 | 0.3236  | 8.1068   | -4.6468 | Down | 7.75E-25  | 4.03E-24  |
| Unigene94308  | Potri.015G004500.1 | 13.8578 | 347.9462 | -4.6501 | Down | 0         | 0         |
| Unigene118875 | Potri.006G110900.2 | 0.9471  | 23.7815  | -4.6502 | Down | 5.00E-78  | 7.96E-77  |
| Unigene98369  | Potri.017G041600.2 | 0.3926  | 9.8701   | -4.6519 | Down | 5.38E-19  | 2.31E-18  |
| Unigene16619  | Potri.010G138600.3 | 0.2443  | 6.1418   | -4.6519 | Down | 5.38E-19  | 2.31E-18  |
| Unigene9061   | Potri.007G102300.2 | 1.0623  | 26.7054  | -4.6519 | Down | 1.61E-54  | 1.72E-53  |
| Unigene116359 | Potri.001G264900.1 | 0.3541  | 8.9018   | -4.6519 | Down | 5.38E-19  | 2.31E-18  |
| Unigene4326   | Potri.003G207200.3 | 4.9309  | 124.24   | -4.6551 | Down | 0         | 0         |
| Unigene109378 | Potri.017G107700.1 | 1.743   | 43.9408  | -4.6559 | Down | 1.27E-60  | 1.52E-59  |
| Unigene91192  | Potri.003G193800.5 | 7.2046  | 181.6686 | -4.6562 | Down | 0         | 0         |
| Unigene1914   | Potri.003G131200.1 | 2.0314  | 51.2498  | -4.657  | Down | 1.54E-214 | 8.68E-213 |
| Unigene59785  | Potri.017G096600.1 | 1.4986  | 37.853   | -4.6587 | Down | 8.08E-55  | 8.70E-54  |
| Unigene31087  | Potri.011G151200.2 | 2.4599  | 62.2501  | -4.6614 | Down | 7.51E-257 | 5.37E-255 |
| Unigene118486 | Potri.006G201900.5 | 0.1673  | 4.2348   | -4.6618 | Down | 3.93E-13  | 1.32E-12  |

|               |                    |         |          |         |      |           |           |
|---------------|--------------------|---------|----------|---------|------|-----------|-----------|
| Unigene106954 | Potri.001G130400.1 | 0.1548  | 3.9185   | -4.6618 | Down | 3.88E-25  | 2.04E-24  |
| Unigene117036 | Potri.017G094700.1 | 0.4363  | 11.0451  | -4.6619 | Down | 3.88E-25  | 2.04E-24  |
| Unigene118970 | Potri.011G120000.3 | 0.1392  | 3.5237   | -4.6619 | Down | 3.93E-13  | 1.32E-12  |
| Unigene29890  | Potri.018G118000.2 | 0.2937  | 7.4358   | -4.6621 | Down | 4.37E-37  | 3.19E-36  |
| Unigene113066 | Potri.016G026800.1 | 0.2984  | 7.5548   | -4.6621 | Down | 3.93E-13  | 1.32E-12  |
| Unigene117461 | Potri.006G060900.1 | 0.2055  | 5.203    | -4.6621 | Down | 3.93E-13  | 1.32E-12  |
| Unigene47294  | Potri.004G027300.1 | 1.7215  | 43.5855  | -4.6621 | Down | 7.93E-73  | 1.16E-71  |
| Unigene115579 | Potri.001G419200.1 | 0.2546  | 6.4461   | -4.6621 | Down | 3.93E-13  | 1.32E-12  |
| Unigene115266 | Potri.004G114600.2 | 0.2608  | 6.6039   | -4.6623 | Down | 3.93E-13  | 1.32E-12  |
| Unigene118513 | Potri.004G097000.1 | 0.1661  | 4.2065   | -4.6625 | Down | 3.93E-13  | 1.32E-12  |
| Unigene34512  | Potri.008G074300.3 | 3.9228  | 99.5649  | -4.6657 | Down | 0         | 0         |
| Unigene118715 | Potri.015G146600.1 | 0.391   | 9.941    | -4.6682 | Down | 2.89E-31  | 1.82E-30  |
| Unigene106297 | Potri.008G186600.1 | 0.345   | 8.7804   | -4.6696 | Down | 2.60E-49  | 2.50E-48  |
| Unigene117671 | Potri.002G053900.1 | 0.2976  | 7.5882   | -4.6723 | Down | 2.70E-19  | 1.17E-18  |
| Unigene41578  | Potri.005G117100.2 | 1.031   | 26.3981  | -4.6783 | Down | 6.54E-104 | 1.46E-102 |
| Unigene103390 | Potri.009G042000.1 | 0.4674  | 11.9851  | -4.6804 | Down | 1.45E-31  | 9.19E-31  |
| Unigene50973  | Potri.007G097500.2 | 1.7553  | 45.102   | -4.6834 | Down | 1.72E-122 | 4.74E-121 |
| Unigene66814  | Potri.003G207200.3 | 9.2441  | 237.7683 | -4.6849 | Down | 0         | 0         |
| Unigene88799  | Potri.008G039600.6 | 35.0025 | 900.9264 | -4.6859 | Down | 0         | 0         |
| Unigene115344 | Potri.003G051000.1 | 0.13    | 3.3604   | -4.692  | Down | 3.22E-07  | 7.70E-07  |
| Unigene112606 | Potri.001G423600.1 | 0.1529  | 3.9526   | -4.6921 | Down | 3.22E-07  | 7.70E-07  |
| Unigene110400 | Potri.013G094600.1 | 0.1673  | 4.3249   | -4.6922 | Down | 3.22E-07  | 7.70E-07  |
| Unigene119077 | Potri.008G041800.2 | 0.1309  | 3.384    | -4.6922 | Down | 1.97E-13  | 6.69E-13  |
| Unigene116269 | Potri.007G124800.1 | 0.1188  | 3.0715   | -4.6923 | Down | 3.22E-07  | 7.70E-07  |
| Unigene119296 | Potri.013G120600.1 | 0.5584  | 14.4378  | -4.6924 | Down | 2.01E-62  | 2.50E-61  |
| Unigene103935 | Potri.013G003500.2 | 0.2509  | 6.4873   | -4.6924 | Down | 1.35E-19  | 5.93E-19  |
| Unigene119376 | Potri.012G013700.1 | 0.7223  | 18.6753  | -4.6924 | Down | 8.02E-87  | 1.44E-85  |
| Unigene102892 | Potri.004G146500.1 | 0.435   | 11.2472  | -4.6924 | Down | 3.28E-50  | 3.22E-49  |
| Unigene105312 | Potri.002G100000.1 | 0.1715  | 4.4342   | -4.6924 | Down | 1.97E-13  | 6.69E-13  |
| Unigene107744 | Potri.001G017700.2 | 0.3675  | 9.5019   | -4.6924 | Down | 1.97E-13  | 6.69E-13  |
| Unigene87486  | Potri.018G141700.2 | 1.8886  | 48.8327  | -4.6925 | Down | 5.14E-99  | 1.09E-97  |
| Unigene106933 | Potri.T050600.1    | 0.1513  | 3.9126   | -4.6926 | Down | 1.97E-13  | 6.69E-13  |
| Unigene102683 | Potri.013G159500.1 | 0.24    | 6.2062   | -4.6926 | Down | 7.26E-32  | 4.64E-31  |
| Unigene115686 | Potri.013G078200.3 | 0.252   | 6.5165   | -4.6926 | Down | 1.97E-13  | 6.69E-13  |
| Unigene117516 | Potri.010G014300.1 | 0.3057  | 7.9053   | -4.6926 | Down | 1.35E-19  | 5.93E-19  |
| Unigene113289 | Potri.003G180600.1 | 0.296   | 7.6543   | -4.6926 | Down | 1.97E-13  | 6.69E-13  |
| Unigene94521  | Potri.003G086200.1 | 0.3108  | 8.037    | -4.6926 | Down | 1.97E-13  | 6.69E-13  |
| Unigene115677 | Potri.003G059500.2 | 0.126   | 3.2583   | -4.6926 | Down | 3.22E-07  | 7.70E-07  |
| Unigene118801 | Potri.002G169900.3 | 0.151   | 3.9046   | -4.6926 | Down | 1.97E-13  | 6.69E-13  |

|               |                    |         |           |         |      |           |           |
|---------------|--------------------|---------|-----------|---------|------|-----------|-----------|
| Unigene101975 | Potri.016G121800.1 | 0.1361  | 3.5199    | -4.6928 | Down | 3.22E-07  | 7.70E-07  |
| Unigene102110 | Potri.014G132500.1 | 0.1366  | 3.5328    | -4.6928 | Down | 1.97E-13  | 6.69E-13  |
| Unigene101771 | Potri.007G119800.1 | 0.1837  | 4.751     | -4.6928 | Down | 9.76E-26  | 5.22E-25  |
| Unigene95622  | Potri.017G020600.1 | 0.1468  | 3.797     | -4.6929 | Down | 1.35E-19  | 5.93E-19  |
| Unigene115160 | Potri.012G108800.1 | 0.1313  | 3.3959    | -4.6929 | Down | 3.22E-07  | 7.70E-07  |
| Unigene20711  | Potri.009G053800.1 | 3.5221  | 91.1321   | -4.6935 | Down | 0         | 0         |
| Unigene86762  | Potri.001G031800.1 | 13.6521 | 354.05    | -4.6968 | Down | 0         | 0         |
| Unigene74756  | Potri.001G221200.1 | 51.7381 | 1342.5933 | -4.6977 | Down | 0         | 0         |
| Unigene4195   | Potri.005G226700.2 | 2.238   | 58.1346   | -4.6991 | Down | 8.36E-112 | 2.06E-110 |
| Unigene104250 | Potri.002G123900.1 | 0.4261  | 11.0725   | -4.6996 | Down | 1.04E-105 | 2.37E-104 |
| Unigene104352 | Potri.004G033900.2 | 0.2708  | 7.0743    | -4.7073 | Down | 4.89E-26  | 2.64E-25  |
| Unigene109572 | Potri.017G134900.1 | 3.4537  | 90.2307   | -4.7074 | Down | 6.85E-125 | 1.93E-123 |
| Unigene117177 | Potri.002G017500.1 | 0.4275  | 11.169    | -4.7074 | Down | 4.89E-26  | 2.64E-25  |
| Unigene100704 | Potri.006G065800.4 | 0.31    | 8.1261    | -4.7122 | Down | 6.76E-20  | 3.00E-19  |
| Unigene35916  | Potri.001G348100.1 | 1.2675  | 33.2601   | -4.7137 | Down | 2.53E-88  | 4.64E-87  |
| Unigene98823  | Potri.017G071400.1 | 0.3557  | 9.3619    | -4.7181 | Down | 5.31E-45  | 4.66E-44  |
| Unigene48500  | Potri.014G023100.1 | 1.4675  | 38.7359   | -4.7222 | Down | 2.00E-76  | 3.11E-75  |
| Unigene114796 | Potri.T126700.1    | 1.0811  | 28.5373   | -4.7223 | Down | 2.06E-51  | 2.08E-50  |
| Unigene99844  | Potri.004G218500.1 | 0.1903  | 5.0232    | -4.7223 | Down | 2.45E-26  | 1.33E-25  |
| Unigene104965 | Potri.006G212300.1 | 0.1643  | 4.3372    | -4.7224 | Down | 9.85E-14  | 3.39E-13  |
| Unigene99076  | Potri.005G108800.1 | 0.1676  | 4.4249    | -4.7226 | Down | 9.85E-14  | 3.39E-13  |
| Unigene107038 | Potri.003G117500.1 | 0.1451  | 3.8309    | -4.7226 | Down | 9.85E-14  | 3.39E-13  |
| Unigene60661  | Potri.006G040800.2 | 3.6918  | 97.5143   | -4.7232 | Down | 1.04E-182 | 4.83E-181 |
| Unigene10007  | Potri.006G006000.5 | 0.6198  | 16.3897   | -4.7248 | Down | 2.52E-70  | 3.56E-69  |
| Unigene109452 | Potri.003G167800.1 | 1.9083  | 50.4651   | -4.7249 | Down | 2.52E-70  | 3.56E-69  |
| Unigene2057   | Potri.015G004500.1 | 10.1947 | 269.7101  | -4.7255 | Down | 0         | 0         |
| Unigene116449 | Potri.019G112400.5 | 0.3508  | 9.322     | -4.7319 | Down | 3.38E-20  | 1.52E-19  |
| Unigene100201 | Potri.014G042600.2 | 0.4762  | 12.6541   | -4.7319 | Down | 3.38E-20  | 1.52E-19  |
| Unigene116406 | Potri.010G095500.1 | 0.3519  | 9.3513    | -4.7319 | Down | 3.38E-20  | 1.52E-19  |
| Unigene119343 | Potri.018G141100.3 | 0.1596  | 4.2421    | -4.7322 | Down | 3.38E-20  | 1.52E-19  |
| Unigene100165 | Potri.018G043500.1 | 0.2369  | 6.3086    | -4.735  | Down | 1.33E-45  | 1.18E-44  |
| Unigene118078 | Potri.014G132500.1 | 0.3684  | 9.8231    | -4.7368 | Down | 1.22E-26  | 6.73E-26  |
| Unigene36494  | Potri.008G045500.1 | 0.2698  | 7.1941    | -4.7369 | Down | 1.22E-26  | 6.73E-26  |
| Unigene42629  | Potri.002G120400.1 | 0.5621  | 14.9938   | -4.7374 | Down | 1.50E-159 | 5.80E-158 |
| Unigene118493 | Potri.008G086500.1 | 0.751   | 20.0477   | -4.7385 | Down | 2.03E-58  | 2.34E-57  |
| Unigene8156   | Potri.015G027700.1 | 1.097   | 29.4061   | -4.7445 | Down | 1.88E-160 | 7.33E-159 |
| Unigene115633 | Potri.018G031800.3 | 0.1269  | 3.4171    | -4.751  | Down | 1.61E-07  | 3.93E-07  |
| Unigene114393 | Potri.006G224800.4 | 0.1387  | 3.7347    | -4.751  | Down | 1.61E-07  | 3.93E-07  |
| Unigene116426 | Potri.018G082300.1 | 0.2339  | 6.2986    | -4.7511 | Down | 4.92E-14  | 1.72E-13  |

|               |                    |         |          |         |      |           |           |
|---------------|--------------------|---------|----------|---------|------|-----------|-----------|
| Unigene115513 | Potri.015G124000.1 | 0.2564  | 6.9047   | -4.7511 | Down | 4.92E-14  | 1.72E-13  |
| Unigene111324 | Potri.003G060000.4 | 0.1615  | 4.349    | -4.7511 | Down | 1.61E-07  | 3.93E-07  |
| Unigene105553 | Potri.001G462700.1 | 0.1282  | 3.4523   | -4.7511 | Down | 1.61E-07  | 3.93E-07  |
| Unigene108417 | Potri.005G241500.1 | 0.1802  | 4.8533   | -4.7513 | Down | 1.61E-07  | 3.93E-07  |
| Unigene62320  | Potri.005G143400.2 | 0.2984  | 8.037    | -4.7513 | Down | 4.92E-14  | 1.72E-13  |
| Unigene105139 | Potri.017G152200.1 | 0.1457  | 3.9243   | -4.7514 | Down | 1.61E-07  | 3.93E-07  |
| Unigene106869 | Potri.017G081000.1 | 0.1747  | 4.7055   | -4.7514 | Down | 4.92E-14  | 1.72E-13  |
| Unigene12219  | Potri.010G126300.1 | 4.9847  | 134.2593 | -4.7514 | Down | 0         | 0         |
| Unigene116133 | Potri.016G071800.1 | 0.1207  | 3.2512   | -4.7515 | Down | 1.61E-07  | 3.93E-07  |
| Unigene112830 | Potri.006G088900.1 | 0.302   | 8.1347   | -4.7515 | Down | 4.92E-14  | 1.72E-13  |
| Unigene114037 | Potri.004G036600.1 | 0.1418  | 3.8199   | -4.7516 | Down | 1.61E-07  | 3.93E-07  |
| Unigene100561 | Potri.006G221200.1 | 0.113   | 3.0443   | -4.7517 | Down | 1.61E-07  | 3.93E-07  |
| Unigene113347 | Potri.004G108000.1 | 0.1474  | 3.9709   | -4.7517 | Down | 1.61E-07  | 3.93E-07  |
| Unigene116540 | Potri.019G108200.1 | 0.1158  | 3.12     | -4.7518 | Down | 1.61E-07  | 3.93E-07  |
| Unigene115008 | Potri.016G136600.1 | 0.1327  | 3.5752   | -4.7518 | Down | 1.61E-07  | 3.93E-07  |
| Unigene104299 | Potri.009G037900.1 | 0.1288  | 3.4702   | -4.7518 | Down | 4.92E-14  | 1.72E-13  |
| Unigene104568 | Potri.016G018400.2 | 0.3328  | 8.9931   | -4.7561 | Down | 1.57E-78  | 2.53E-77  |
| Unigene92918  | Potri.003G141800.1 | 17.0986 | 462.5574 | -4.7577 | Down | 0         | 0         |
| Unigene44544  | Potri.019G085400.1 | 1.996   | 54.0283  | -4.7585 | Down | 2.76E-207 | 1.50E-205 |
| Unigene102980 | Potri.015G145600.3 | 0.3169  | 8.5832   | -4.7594 | Down | 1.67E-46  | 1.51E-45  |
| Unigene7279   | Potri.019G043600.1 | 2.0177  | 54.6568  | -4.7596 | Down | 9.44E-227 | 5.70E-225 |
| Unigene104578 | Potri.013G059900.1 | 0.2306  | 6.2731   | -4.7657 | Down | 3.24E-53  | 3.39E-52  |
| Unigene119003 | Potri.018G094800.1 | 0.8913  | 24.3032  | -4.7691 | Down | 7.86E-86  | 1.40E-84  |
| Unigene106535 | Potri.002G121900.1 | 0.746   | 20.3605  | -4.7705 | Down | 6.31E-99  | 1.34E-97  |
| Unigene106937 | Potri.007G005900.1 | 0.2302  | 6.2841   | -4.7707 | Down | 8.46E-21  | 3.86E-20  |
| Unigene15145  | Potri.011G135700.1 | 0.6691  | 18.2906  | -4.7727 | Down | 1.62E-53  | 1.70E-52  |
| Unigene119152 | Potri.011G097400.1 | 0.3119  | 8.5343   | -4.7741 | Down | 5.71E-34  | 3.85E-33  |
| Unigene20940  | Potri.004G100700.6 | 1.9686  | 53.9152  | -4.7755 | Down | 3.18E-249 | 2.19E-247 |
| Unigene98398  | Potri.011G146500.1 | 0.3562  | 9.7585   | -4.7759 | Down | 4.17E-47  | 3.84E-46  |
| Unigene29065  | Potri.010G010600.1 | 1.3577  | 37.2597  | -4.7784 | Down | 9.50E-237 | 6.08E-235 |
| Unigene101538 | Potri.009G133600.2 | 0.2555  | 7.0186   | -4.7798 | Down | 2.46E-14  | 8.70E-14  |
| Unigene118956 | Potri.003G088300.8 | 0.1405  | 3.8596   | -4.7798 | Down | 2.46E-14  | 8.70E-14  |
| Unigene24847  | Potri.017G076800.1 | 2.7004  | 74.1881  | -4.7799 | Down | 3.17E-106 | 7.30E-105 |
| Unigene116032 | Potri.009G021700.1 | 0.2438  | 6.6975   | -4.7799 | Down | 2.46E-14  | 8.70E-14  |
| Unigene97610  | Potri.005G046700.4 | 0.2078  | 5.7088   | -4.7799 | Down | 2.46E-14  | 8.70E-14  |
| Unigene3861   | Potri.001G060400.1 | 0.7139  | 19.6119  | -4.7799 | Down | 8.12E-54  | 8.57E-53  |
| Unigene9525   | Potri.009G053800.1 | 2.6175  | 72.0866  | -4.7835 | Down | 1.59E-106 | 3.67E-105 |
| Unigene95645  | Potri.001G445800.1 | 0.3486  | 9.6394   | -4.7893 | Down | 4.23E-21  | 1.95E-20  |
| Unigene104590 | Potri.019G086400.1 | 0.1576  | 4.3581   | -4.7894 | Down | 4.23E-21  | 1.95E-20  |

|               |                     |         |          |         |      |           |           |
|---------------|---------------------|---------|----------|---------|------|-----------|-----------|
| Unigene102108 | Potri.011G135000.1  | 0.1871  | 5.1743   | -4.7895 | Down | 4.23E-21  | 1.95E-20  |
| Unigene103212 | Potri.005G089900.1  | 0.3032  | 8.3855   | -4.7896 | Down | 4.23E-21  | 1.95E-20  |
| Unigene688    | Potri.001G013400.1  | 5.1591  | 142.7246 | -4.79   | Down | 0         | 0         |
| Unigene90558  | Potri.001G031800.10 | 10.6294 | 294.2057 | -4.7907 | Down | 0         | 0         |
| Unigene12317  | Potri.003G150700.1  | 8.0723  | 223.6876 | -4.7924 | Down | 0         | 0         |
| Unigene26795  | Potri.005G103900.3  | 0.3698  | 10.3024  | -4.8001 | Down | 5.22E-48  | 4.89E-47  |
| Unigene102922 | Potri.005G207100.1  | 0.1134  | 3.1757   | -4.8076 | Down | 8.02E-08  | 2.00E-07  |
| Unigene116707 | Potri.002G229400.1  | 0.1134  | 3.1757   | -4.8076 | Down | 8.02E-08  | 2.00E-07  |
| Unigene115755 | Potri.001G323100.3  | 0.1252  | 3.5061   | -4.8076 | Down | 8.02E-08  | 2.00E-07  |
| Unigene112313 | Potri.018G150700.2  | 0.1548  | 4.3353   | -4.8077 | Down | 8.02E-08  | 2.00E-07  |
| Unigene102434 | Potri.012G122900.1  | 0.2733  | 7.6543   | -4.8077 | Down | 1.23E-14  | 4.40E-14  |
| Unigene94946  | Potri.010G102900.1  | 0.1785  | 4.9991   | -4.8077 | Down | 8.02E-08  | 2.00E-07  |
| Unigene108258 | Potri.008G180900.2  | 0.1811  | 5.0719   | -4.8077 | Down | 8.02E-08  | 2.00E-07  |
| Unigene108929 | Potri.001G331600.2  | 0.1768  | 4.9517   | -4.8077 | Down | 8.02E-08  | 2.00E-07  |
| Unigene115532 | Potri.001G275800.1  | 0.1282  | 3.5904   | -4.8077 | Down | 8.02E-08  | 2.00E-07  |
| Unigene114071 | Potri.014G159400.1  | 0.1413  | 3.9576   | -4.8078 | Down | 8.02E-08  | 2.00E-07  |
| Unigene111072 | Potri.014G066000.4  | 0.1629  | 4.5625   | -4.8078 | Down | 8.02E-08  | 2.00E-07  |
| Unigene115734 | Potri.014G002800.1  | 0.1256  | 3.5179   | -4.8078 | Down | 8.02E-08  | 2.00E-07  |
| Unigene105192 | Potri.013G134200.2  | 0.215   | 6.022    | -4.8078 | Down | 3.82E-28  | 2.20E-27  |
| Unigene117946 | Potri.016G001600.1  | 0.3787  | 10.6073  | -4.8079 | Down | 3.82E-28  | 2.20E-27  |
| Unigene87111  | Potri.006G261200.1  | 4.9173  | 137.7409 | -4.8079 | Down | 6.54E-276 | 5.16E-274 |
| Unigene117063 | Potri.002G021600.1  | 0.2175  | 6.0922   | -4.8079 | Down | 1.23E-14  | 4.40E-14  |
| Unigene113034 | Potri.001G273400.6  | 0.1498  | 4.196    | -4.8079 | Down | 8.02E-08  | 2.00E-07  |
| Unigene105244 | Potri.019G042200.2  | 0.144   | 4.034    | -4.8081 | Down | 8.02E-08  | 2.00E-07  |
| Unigene100592 | Potri.014G116000.1  | 0.1203  | 3.3704   | -4.8082 | Down | 8.02E-08  | 2.00E-07  |
| Unigene95528  | Potri.004G043500.1  | 0.1137  | 3.1854   | -4.8082 | Down | 8.02E-08  | 2.00E-07  |
| Unigene114579 | Potri.015G073300.1  | 0.1371  | 3.8412   | -4.8083 | Down | 8.02E-08  | 2.00E-07  |
| Unigene107999 | Potri.009G119300.1  | 0.1828  | 5.1216   | -4.8083 | Down | 8.02E-08  | 2.00E-07  |
| Unigene111819 | Potri.019G031300.1  | 0.158   | 4.4272   | -4.8084 | Down | 8.02E-08  | 2.00E-07  |
| Unigene113378 | Potri.002G054100.3  | 0.8811  | 24.8389  | -4.8172 | Down | 6.76E-42  | 5.54E-41  |
| Unigene114014 | Potri.012G131100.1  | 0.7091  | 20.0162  | -4.819  | Down | 3.56E-35  | 2.47E-34  |
| Unigene113895 | Potri.004G168600.9  | 1.2862  | 36.336   | -4.8202 | Down | 2.48E-62  | 3.07E-61  |
| Unigene108845 | Potri.001G399600.8  | 1.4209  | 40.1852  | -4.8218 | Down | 1.26E-55  | 1.39E-54  |
| Unigene118637 | Potri.012G033500.3  | 0.4813  | 13.6543  | -4.8263 | Down | 3.38E-42  | 2.79E-41  |
| Unigene104670 | Potri.009G108700.1  | 0.1673  | 4.7754   | -4.8351 | Down | 6.13E-15  | 2.23E-14  |
| Unigene113117 | Potri.009G125600.1  | 0.2984  | 8.5193   | -4.8354 | Down | 6.13E-15  | 2.23E-14  |
| Unigene101920 | Potri.006G020800.1  | 0.2207  | 6.3012   | -4.8355 | Down | 6.13E-15  | 2.23E-14  |
| Unigene115383 | Potri.009G031800.1  | 0.259   | 7.3952   | -4.8356 | Down | 6.13E-15  | 2.23E-14  |
| Unigene105277 | Potri.017G090300.4  | 0.5567  | 15.9541  | -4.8409 | Down | 8.87E-36  | 6.28E-35  |

|               |                    |         |          |         |      |           |           |
|---------------|--------------------|---------|----------|---------|------|-----------|-----------|
| Unigene66643  | Potri.011G142700.1 | 5.576   | 159.866  | -4.8415 | Down | 0         | 0         |
| Unigene8476   | Potri.018G152200.3 | 1.6272  | 46.7254  | -4.8437 | Down | 1.08E-180 | 4.98E-179 |
| Unigene119194 | Potri.005G103900.3 | 0.1822  | 5.2359   | -4.8448 | Down | 5.26E-22  | 2.50E-21  |
| Unigene72001  | Potri.001G079000.1 | 19.2866 | 554.9479 | -4.8467 | Down | 0         | 0         |
| Unigene6411   | Potri.T123700.1    | 1.3047  | 37.622   | -4.8498 | Down | 3.01E-119 | 8.04E-118 |
| Unigene85834  | Potri.003G072800.1 | 29.3068 | 845.9396 | -4.8512 | Down | 0         | 0         |
| Unigene25745  | Potri.001G254100.2 | 11.0765 | 319.761  | -4.8514 | Down | 0         | 0         |
| Unigene118564 | Potri.017G002100.1 | 0.4919  | 14.2194  | -4.8534 | Down | 4.20E-43  | 3.54E-42  |
| Unigene47697  | Potri.016G083900.1 | 9.406   | 272.6304 | -4.8572 | Down | 0         | 0         |
| Unigene35423  | Potri.009G169900.1 | 1.903   | 55.2205  | -4.8589 | Down | 3.70E-106 | 8.51E-105 |
| Unigene19269  | Potri.013G103800.1 | 7.8339  | 227.4267 | -4.8595 | Down | 0         | 0         |
| Unigene114816 | Potri.010G040400.1 | 0.1347  | 3.917    | -4.8619 | Down | 4.00E-08  | 1.02E-07  |
| Unigene117219 | Potri.015G007200.1 | 0.1063  | 3.0912   | -4.862  | Down | 4.00E-08  | 1.02E-07  |
| Unigene106362 | Potri.009G161400.1 | 0.2784  | 8.097    | -4.8622 | Down | 2.37E-29  | 1.41E-28  |
| Unigene115302 | Potri.001G414700.1 | 0.3913  | 11.3811  | -4.8622 | Down | 2.62E-22  | 1.26E-21  |
| Unigene112204 | Potri.005G165300.1 | 0.1554  | 4.5208   | -4.8625 | Down | 4.00E-08  | 1.02E-07  |
| Unigene112224 | Potri.001G229300.1 | 0.1554  | 4.5208   | -4.8625 | Down | 4.00E-08  | 1.02E-07  |
| Unigene118729 | Potri.016G017800.1 | 0.1557  | 4.5303   | -4.8628 | Down | 3.05E-15  | 1.12E-14  |
| Unigene108190 | Potri.004G231500.1 | 0.1819  | 5.2927   | -4.8628 | Down | 4.00E-08  | 1.02E-07  |
| Unigene22526  | Potri.017G015800.1 | 1.6336  | 47.5602  | -4.8636 | Down | 1.46E-295 | 1.27E-293 |
| Unigene1506   | Potri.003G193800.5 | 3.7269  | 108.6096 | -4.865  | Down | 0         | 0         |
| Unigene93531  | Potri.001G079000.1 | 13.4379 | 392.3131 | -4.8676 | Down | 0         | 0         |
| Unigene19351  | Potri.011G146500.1 | 0.6959  | 20.3175  | -4.8677 | Down | 9.41E-72  | 1.36E-70  |
| Unigene104488 | Potri.016G083900.1 | 2.5105  | 73.6085  | -4.8738 | Down | 3.35E-199 | 1.74E-197 |
| Unigene46819  | Potri.014G192100.1 | 0.5639  | 16.5341  | -4.8739 | Down | 2.29E-100 | 4.93E-99  |
| Unigene118698 | Potri.009G149700.1 | 0.7082  | 20.8556  | -4.8801 | Down | 2.38E-65  | 3.11E-64  |
| Unigene33652  | Potri.016G038000.1 | 5.3644  | 158.4832 | -4.8848 | Down | 0         | 0         |
| Unigene659    | Potri.009G124400.1 | 3.218   | 95.1313  | -4.8857 | Down | 0         | 0         |
| Unigene8815   | Potri.003G112700.1 | 0.6108  | 18.0566  | -4.8857 | Down | 1.43E-115 | 3.68E-114 |
| Unigene118062 | Potri.013G066200.1 | 0.1847  | 5.4708   | -4.8885 | Down | 1.52E-15  | 5.68E-15  |
| Unigene118621 | Potri.004G102800.1 | 0.1615  | 4.784    | -4.8886 | Down | 1.52E-15  | 5.68E-15  |
| Unigene105862 | Potri.011G003700.2 | 0.2317  | 6.8639   | -4.8887 | Down | 1.52E-15  | 5.68E-15  |
| Unigene104058 | Potri.006G062300.5 | 0.141   | 4.178    | -4.889  | Down | 1.52E-15  | 5.68E-15  |
| Unigene108590 | Potri.011G106400.1 | 0.3586  | 10.6259  | -4.8891 | Down | 1.52E-15  | 5.68E-15  |
| Unigene106906 | Potri.010G094100.1 | 0.1661  | 4.9225   | -4.8893 | Down | 1.52E-15  | 5.68E-15  |
| Unigene36948  | Potri.012G090000.1 | 3.3255  | 98.8653  | -4.8938 | Down | 5.94E-267 | 4.48E-265 |
| Unigene25395  | Potri.008G129800.1 | 0.9068  | 26.9638  | -4.8941 | Down | 3.54E-109 | 8.45E-108 |
| Unigene96132  | Potri.005G044700.1 | 0.3232  | 9.611    | -4.8942 | Down | 2.74E-37  | 2.01E-36  |
| Unigene47360  | Potri.001G414700.1 | 9.218   | 275.1535 | -4.8996 | Down | 0         | 0         |



|               |                     |        |          |         |      |           |           |
|---------------|---------------------|--------|----------|---------|------|-----------|-----------|
| Unigene105007 | Potri.002G012900.1  | 0.3613 | 10.8004  | -4.9017 | Down | 2.94E-30  | 1.80E-29  |
| Unigene9124   | Potri.002G120400.1  | 0.5897 | 17.6307  | -4.902  | Down | 2.94E-30  | 1.80E-29  |
| Unigene47049  | Potri.017G040900.1  | 0.3121 | 9.3317   | -4.9021 | Down | 2.94E-30  | 1.80E-29  |
| Unigene84438  | Potri.001G031800.8  | 5.9035 | 176.6414 | -4.9031 | Down | 0         | 0         |
| Unigene88300  | Potri.004G152300.1  | 8.2511 | 247.5652 | -4.9071 | Down | 0         | 0         |
| Unigene101465 | Potri.012G097400.2  | 0.4917 | 14.7573  | -4.9075 | Down | 3.10E-52  | 3.17E-51  |
| Unigene17878  | Potri.002G085100.3  | 2.2232 | 66.9753  | -4.9129 | Down | 2.98E-198 | 1.54E-196 |
| Unigene114824 | Potri.001G006500.1  | 0.1347 | 4.062    | -4.9144 | Down | 1.99E-08  | 5.17E-08  |
| Unigene104774 | Potri.006G029900.1  | 0.1269 | 3.8272   | -4.9145 | Down | 1.99E-08  | 5.17E-08  |
| Unigene110436 | Potri.001G207000.1  | 0.1673 | 5.0457   | -4.9145 | Down | 1.99E-08  | 5.17E-08  |
| Unigene4720   | Potri.T108600.1     | 0.231  | 6.9671   | -4.9146 | Down | 7.58E-16  | 2.87E-15  |
| Unigene117157 | Potri.007G131200.1  | 0.1072 | 3.2333   | -4.9146 | Down | 1.99E-08  | 5.17E-08  |
| Unigene113654 | Potri.001G449500.11 | 0.1446 | 4.3612   | -4.9146 | Down | 1.99E-08  | 5.17E-08  |
| Unigene101629 | Potri.003G146800.1  | 0.3064 | 9.2418   | -4.9147 | Down | 1.46E-30  | 9.03E-30  |
| Unigene47061  | Potri.019G100700.1  | 0.4135 | 12.4743  | -4.9149 | Down | 6.81E-38  | 5.08E-37  |
| Unigene41440  | Potri.010G042100.3  | 1.4281 | 43.0814  | -4.9149 | Down | 1.37E-125 | 3.89E-124 |
| Unigene2279   | Potri.007G140300.1  | 3.8627 | 116.5241 | -4.9149 | Down | 0         | 0         |
| Unigene114999 | Potri.019G025600.5  | 0.1332 | 4.0185   | -4.915  | Down | 1.99E-08  | 5.17E-08  |
| Unigene116147 | Potri.016G135500.2  | 0.1207 | 3.6414   | -4.915  | Down | 1.99E-08  | 5.17E-08  |
| Unigene115702 | Potri.007G112300.2  | 0.504  | 15.2052  | -4.915  | Down | 1.46E-30  | 9.03E-30  |
| Unigene97897  | Potri.T011100.1     | 0.1151 | 3.4728   | -4.9151 | Down | 1.99E-08  | 5.17E-08  |
| Unigene97133  | Potri.016G011400.1  | 0.2267 | 6.84     | -4.9151 | Down | 7.58E-16  | 2.87E-15  |
| Unigene114681 | Potri.002G165300.1  | 0.1361 | 4.1065   | -4.9152 | Down | 1.99E-08  | 5.17E-08  |
| Unigene101363 | Potri.009G047500.3  | 0.113  | 3.4097   | -4.9153 | Down | 1.99E-08  | 5.17E-08  |
| Unigene115185 | Potri.003G022900.2  | 0.1313 | 3.9619   | -4.9153 | Down | 1.99E-08  | 5.17E-08  |
| Unigene105447 | Potri.015G146000.1  | 0.1381 | 4.1674   | -4.9154 | Down | 1.99E-08  | 5.17E-08  |
| Unigene59670  | Potri.003G111500.1  | 7.229  | 218.1696 | -4.9155 | Down | 0         | 0         |
| Unigene58009  | Potri.001G167900.1  | 1.1493 | 35.0073  | -4.9288 | Down | 1.10E-82  | 1.86E-81  |
| Unigene101735 | Potri.013G160500.1  | 0.2234 | 6.8178   | -4.9316 | Down | 1.62E-23  | 8.07E-23  |
| Unigene23172  | Potri.006G110900.3  | 1.7058 | 52.0692  | -4.9319 | Down | 1.67E-112 | 4.14E-111 |
| Unigene116649 | Potri.002G166100.1  | 0.3422 | 10.4457  | -4.9319 | Down | 1.62E-23  | 8.07E-23  |
| Unigene118987 | Potri.010G106400.3  | 0.2068 | 6.3138   | -4.9322 | Down | 1.62E-23  | 8.07E-23  |
| Unigene103861 | Potri.002G023400.2  | 0.1638 | 5.0011   | -4.9322 | Down | 1.62E-23  | 8.07E-23  |
| Unigene99292  | Potri.006G277500.3  | 0.2165 | 6.6198   | -4.9343 | Down | 9.27E-61  | 1.12E-59  |
| Unigene103181 | Potri.004G197100.1  | 0.2664 | 8.1519   | -4.9355 | Down | 1.69E-38  | 1.28E-37  |
| Unigene4208   | Potri.006G129800.1  | 1.2523 | 38.3542  | -4.9367 | Down | 1.67E-105 | 3.80E-104 |
| Unigene106350 | Potri.001G209100.9  | 0.1217 | 3.7366   | -4.9403 | Down | 3.77E-16  | 1.45E-15  |
| Unigene61326  | Potri.006G261200.1  | 1.9128 | 58.7322  | -4.9404 | Down | 6.72E-91  | 1.28E-89  |
| Unigene113919 | Potri.001G204200.1  | 0.2847 | 8.7426   | -4.9405 | Down | 3.77E-16  | 1.45E-15  |

|               |                     |        |         |         |      |           |           |
|---------------|---------------------|--------|---------|---------|------|-----------|-----------|
| Unigene118030 | Potri.010G120000.2  | 0.186  | 5.7121  | -4.9406 | Down | 3.77E-16  | 1.45E-15  |
| Unigene112017 | Potri.011G142700.1  | 2.5075 | 77.1623 | -4.9436 | Down | 5.16E-121 | 1.41E-119 |
| Unigene101273 | Potri.016G011600.2  | 0.5939 | 18.3009 | -4.9456 | Down | 8.41E-39  | 6.40E-38  |
| Unigene115322 | Potri.006G211700.3  | 0.3899 | 12.0416 | -4.9488 | Down | 8.05E-24  | 4.06E-23  |
| Unigene87317  | Potri.002G180800.5  | 16.274 | 502.827 | -4.9494 | Down | 0         | 0         |
| Unigene112509 | Potri.007G029200.1  | 0.614  | 19.0177 | -4.953  | Down | 1.81E-31  | 1.14E-30  |
| Unigene29860  | Potri.001G124200.1  | 1.6819 | 52.4433 | -4.9626 | Down | 1.97E-130 | 5.88E-129 |
| Unigene114828 | Potri.013G090900.1  | 0.1347 | 4.2071  | -4.965  | Down | 9.88E-09  | 2.62E-08  |
| Unigene116659 | Potri.003G137800.1  | 0.1141 | 3.5638  | -4.965  | Down | 9.88E-09  | 2.62E-08  |
| Unigene108727 | Potri.005G081200.1  | 0.1785 | 5.5759  | -4.9652 | Down | 9.88E-09  | 2.62E-08  |
| Unigene108232 | Potri.005G024000.1  | 0.1811 | 5.6571  | -4.9652 | Down | 9.88E-09  | 2.62E-08  |
| Unigene112321 | Potri.002G105100.5  | 0.1548 | 4.8356  | -4.9652 | Down | 9.88E-09  | 2.62E-08  |
| Unigene96470  | Potri.001G389400.1  | 0.2022 | 6.3164  | -4.9652 | Down | 1.88E-16  | 7.28E-16  |
| Unigene106854 | Potri.018G040600.1  | 0.1584 | 4.9485  | -4.9653 | Down | 1.88E-16  | 7.28E-16  |
| Unigene105262 | Potri.017G136900.1  | 0.2317 | 7.2383  | -4.9653 | Down | 4.01E-24  | 2.04E-23  |
| Unigene111114 | Potri.016G118800.1  | 0.1629 | 5.089   | -4.9653 | Down | 9.88E-09  | 2.62E-08  |
| Unigene109017 | Potri.008G014400.1  | 0.1768 | 5.5231  | -4.9653 | Down | 9.88E-09  | 2.62E-08  |
| Unigene98141  | Potri.001G253200.2  | 0.1608 | 5.0232  | -4.9653 | Down | 9.88E-09  | 2.62E-08  |
| Unigene101875 | Potri.001G143400.11 | 0.2723 | 8.5064  | -4.9653 | Down | 4.01E-24  | 2.04E-23  |
| Unigene116302 | Potri.012G050700.1  | 0.1188 | 3.7114  | -4.9654 | Down | 9.88E-09  | 2.62E-08  |
| Unigene114731 | Potri.010G189800.5  | 0.6782 | 21.1886 | -4.9654 | Down | 2.08E-39  | 1.61E-38  |
| Unigene114645 | Potri.008G133500.3  | 0.4084 | 12.7595 | -4.9654 | Down | 4.01E-24  | 2.04E-23  |
| Unigene106436 | Potri.014G154500.1  | 0.1231 | 3.8461  | -4.9655 | Down | 1.88E-16  | 7.28E-16  |
| Unigene111576 | Potri.014G068500.2  | 0.3188 | 9.9604  | -4.9655 | Down | 1.88E-16  | 7.28E-16  |
| Unigene110884 | Potri.011G108500.1  | 0.1643 | 5.1338  | -4.9656 | Down | 9.88E-09  | 2.62E-08  |
| Unigene116124 | Potri.002G258100.1  | 0.1207 | 3.7714  | -4.9656 | Down | 9.88E-09  | 2.62E-08  |
| Unigene116216 | Potri.002G120400.1  | 0.8368 | 26.1461 | -4.9656 | Down | 1.18E-54  | 1.26E-53  |
| Unigene117729 | Potri.014G194900.3  | 0.0984 | 3.0749  | -4.9657 | Down | 9.88E-09  | 2.62E-08  |
| Unigene99095  | Potri.011G002400.1  | 0.1699 | 5.3092  | -4.9657 | Down | 1.88E-16  | 7.28E-16  |
| Unigene104928 | Potri.014G145400.2  | 0.1356 | 4.2377  | -4.9659 | Down | 9.88E-09  | 2.62E-08  |
| Unigene112702 | Potri.008G134800.1  | 0.1522 | 4.7566  | -4.9659 | Down | 9.88E-09  | 2.62E-08  |
| Unigene98088  | Potri.004G172100.1  | 0.1522 | 4.7566  | -4.9659 | Down | 9.88E-09  | 2.62E-08  |
| Unigene119413 | Potri.003G088300.1  | 0.098  | 3.0627  | -4.9659 | Down | 1.88E-16  | 7.28E-16  |
| Unigene117767 | Potri.014G175400.1  | 0.0976 | 3.0507  | -4.9661 | Down | 9.88E-09  | 2.62E-08  |
| Unigene117060 | Potri.013G059900.1  | 0.1087 | 3.3976  | -4.9661 | Down | 9.88E-09  | 2.62E-08  |
| Unigene1485   | Potri.009G012700.5  | 1.121  | 35.1346 | -4.97   | Down | 2.07E-85  | 3.66E-84  |
| Unigene119153 | Potri.009G024600.4  | 0.5614 | 17.6062 | -4.9709 | Down | 3.44E-70  | 4.84E-69  |
| Unigene119049 | Potri.009G010700.2  | 0.9375 | 29.5076 | -4.9761 | Down | 7.78E-109 | 1.85E-107 |
| Unigene117098 | Potri.001G222500.2  | 0.4325 | 13.628  | -4.9777 | Down | 4.48E-32  | 2.88E-31  |

|               |                    |         |          |         |      |           |           |
|---------------|--------------------|---------|----------|---------|------|-----------|-----------|
| Unigene55723  | Potri.003G111400.1 | 3.3367  | 105.1491 | -4.9779 | Down | 1.93E-216 | 1.10E-214 |
| Unigene115595 | Potri.001G292100.2 | 0.5092  | 16.0467  | -4.9779 | Down | 4.48E-32  | 2.88E-31  |
| Unigene110599 | Potri.004G049100.1 | 1.1604  | 36.6132  | -4.9797 | Down | 2.91E-55  | 3.16E-54  |
| Unigene103391 | Potri.006G118800.4 | 0.3412  | 10.7814  | -4.9818 | Down | 1.22E-47  | 1.13E-46  |
| Unigene35382  | Potri.004G234100.1 | 1.4285  | 45.1442  | -4.982  | Down | 8.51E-71  | 1.21E-69  |
| Unigene19863  | Potri.001G079000.1 | 10.1836 | 322.2607 | -4.9839 | Down | 0         | 0         |
| Unigene95766  | Potri.019G043100.1 | 0.1561  | 4.9601   | -4.9898 | Down | 9.33E-17  | 3.67E-16  |
| Unigene102499 | Potri.017G073900.2 | 0.2234  | 7.0986   | -4.9898 | Down | 9.33E-17  | 3.67E-16  |
| Unigene98196  | Potri.006G270800.1 | 0.2555  | 8.1196   | -4.99   | Down | 9.33E-17  | 3.67E-16  |
| Unigene118920 | Potri.T098800.1    | 0.1429  | 4.542    | -4.9902 | Down | 9.33E-17  | 3.67E-16  |
| Unigene102689 | Potri.018G065500.1 | 0.2462  | 7.8248   | -4.9902 | Down | 9.33E-17  | 3.67E-16  |
| Unigene76095  | Potri.014G106800.9 | 5.6615  | 180.2952 | -4.993  | Down | 1.19E-265 | 8.89E-264 |
| Unigene4523   | Potri.001G083900.1 | 1.6473  | 52.4816  | -4.9936 | Down | 2.38E-110 | 5.76E-109 |
| Unigene118168 | Potri.007G138800.1 | 0.4516  | 14.4005  | -4.9949 | Down | 2.57E-40  | 2.03E-39  |
| Unigene22853  | Potri.015G068200.1 | 1.8934  | 60.3798  | -4.995  | Down | 5.75E-235 | 3.62E-233 |
| Unigene119355 | Potri.004G202900.2 | 0.1574  | 5.0302   | -4.9981 | Down | 9.91E-25  | 5.14E-24  |
| Unigene117411 | Potri.010G042000.1 | 0.6217  | 19.8694  | -4.9982 | Down | 3.01E-48  | 2.84E-47  |
| Unigene18168  | Potri.019G119300.2 | 8.599   | 275.2807 | -5.0006 | Down | 0         | 0         |
| Unigene97116  | Potri.006G110900.1 | 0.5367  | 17.2016  | -5.0023 | Down | 1.11E-32  | 7.25E-32  |
| Unigene119225 | Potri.001G180500.1 | 0.2357  | 7.5546   | -5.0023 | Down | 1.11E-32  | 7.25E-32  |
| Unigene21728  | Potri.002G144200.3 | 1.2892  | 41.3426  | -5.0031 | Down | 1.75E-236 | 1.12E-234 |
| Unigene94067  | Potri.018G025900.1 | 8.5212  | 273.3803 | -5.0037 | Down | 0         | 0         |
| Unigene14218  | Potri.002G225500.2 | 2.7182  | 87.2035  | -5.0037 | Down | 1.40E-142 | 4.69E-141 |
| Unigene99740  | Potri.010G249400.1 | 0.2638  | 8.469    | -5.0047 | Down | 1.28E-40  | 1.02E-39  |
| Unigene103633 | Potri.003G079700.1 | 0.4736  | 15.2449  | -5.0085 | Down | 2.14E-64  | 2.75E-63  |
| Unigene94348  | Potri.006G152200.1 | 12.1902 | 392.8638 | -5.0102 | Down | 0         | 0         |
| Unigene117981 | Potri.002G058500.2 | 0.094   | 3.0367   | -5.0137 | Down | 4.90E-09  | 1.32E-08  |
| Unigene106230 | Potri.008G140500.1 | 0.1091  | 3.525    | -5.0139 | Down | 4.64E-17  | 1.85E-16  |
| Unigene101262 | Potri.003G082300.1 | 0.1529  | 4.9408   | -5.0141 | Down | 4.90E-09  | 1.32E-08  |
| Unigene104504 | Potri.010G069800.1 | 0.2203  | 7.1194   | -5.0142 | Down | 4.92E-25  | 2.58E-24  |
| Unigene101648 | Potri.008G212200.1 | 0.1504  | 4.8611   | -5.0144 | Down | 4.90E-09  | 1.32E-08  |
| Unigene117535 | Potri.008G113900.1 | 1.118   | 36.1338  | -5.0144 | Down | 1.92E-88  | 3.53E-87  |
| Unigene115114 | Potri.002G114700.1 | 0.1318  | 4.2599   | -5.0144 | Down | 4.90E-09  | 1.32E-08  |
| Unigene103873 | Potri.015G102700.1 | 0.1554  | 5.0232   | -5.0145 | Down | 4.64E-17  | 1.85E-16  |
| Unigene105526 | Potri.001G070700.1 | 0.1332  | 4.3056   | -5.0145 | Down | 4.90E-09  | 1.32E-08  |
| Unigene100846 | Potri.004G096700.1 | 0.2608  | 8.4305   | -5.0146 | Down | 4.64E-17  | 1.85E-16  |
| Unigene112359 | Potri.007G135100.1 | 0.1541  | 4.9816   | -5.0147 | Down | 4.90E-09  | 1.32E-08  |
| Unigene56243  | Potri.010G223200.1 | 0.1695  | 5.4798   | -5.0148 | Down | 4.90E-09  | 1.32E-08  |
| Unigene102969 | Potri.004G137400.1 | 0.1113  | 3.5987   | -5.015  | Down | 4.90E-09  | 1.32E-08  |

|               |                     |         |          |         |      |           |           |
|---------------|---------------------|---------|----------|---------|------|-----------|-----------|
| Unigene75686  | Potri.T123700.1     | 2.6883  | 87.249   | -5.0204 | Down | 1.37E-128 | 4.01E-127 |
| Unigene33746  | Potri.002G188100.1  | 1.0738  | 34.8881  | -5.0219 | Down | 1.32E-152 | 4.85E-151 |
| Unigene24928  | Potri.001G092200.1  | 0.6217  | 20.2753  | -5.0274 | Down | 2.36E-89  | 4.39E-88  |
| Unigene106785 | Potri.015G038700.1  | 0.277   | 9.0516   | -5.0302 | Down | 2.45E-25  | 1.29E-24  |
| Unigene115615 | Potri.010G125300.1  | 0.7612  | 24.8766  | -5.0304 | Down | 1.84E-49  | 1.78E-48  |
| Unigene106581 | Potri.011G093000.1  | 0.2683  | 8.7887   | -5.0337 | Down | 1.57E-41  | 1.28E-40  |
| Unigene81292  | Potri.014G106800.10 | 28.0115 | 917.5887 | -5.0338 | Down | 0         | 0         |
| Unigene94725  | Potri.013G067000.1  | 0.1416  | 4.6514   | -5.0378 | Down | 2.30E-17  | 9.27E-17  |
| Unigene104335 | Potri.006G266600.1  | 0.1416  | 4.6514   | -5.0378 | Down | 2.30E-17  | 9.27E-17  |
| Unigene119068 | Potri.011G066800.1  | 0.1316  | 4.3233   | -5.0379 | Down | 2.30E-17  | 9.27E-17  |
| Unigene104835 | Potri.002G244400.2  | 0.3045  | 10.0053  | -5.0382 | Down | 2.30E-17  | 9.27E-17  |
| Unigene99172  | Potri.013G047500.1  | 0.2572  | 8.4528   | -5.0385 | Down | 2.30E-17  | 9.27E-17  |
| Unigene119098 | Potri.019G031200.2  | 0.1297  | 4.2631   | -5.0387 | Down | 2.30E-17  | 9.27E-17  |
| Unigene106376 | Potri.T023300.1     | 0.4863  | 16.0322  | -5.043  | Down | 2.37E-82  | 4.01E-81  |
| Unigene117553 | Potri.001G067100.1  | 0.3032  | 10.0191  | -5.0463 | Down | 1.22E-25  | 6.49E-25  |
| Unigene105908 | Potri.013G086000.1  | 0.1582  | 5.2415   | -5.0502 | Down | 6.76E-34  | 4.55E-33  |
| Unigene29508  | Potri.014G053900.3  | 27.5355 | 913.0168 | -5.0513 | Down | 0         | 0         |
| Unigene102864 | Potri.001G122800.1  | 0.5534  | 18.3636  | -5.0524 | Down | 3.87E-42  | 3.19E-41  |
| Unigene19612  | Potri.005G135300.1  | 0.7612  | 25.337   | -5.0568 | Down | 7.43E-157 | 2.82E-155 |
| Unigene115348 | Potri.011G069200.1  | 0.13    | 4.3406   | -5.0613 | Down | 2.43E-09  | 6.69E-09  |
| Unigene115252 | Potri.004G132200.3  | 0.1309  | 4.371    | -5.0614 | Down | 2.43E-09  | 6.69E-09  |
| Unigene111168 | Potri.014G153500.1  | 0.1622  | 5.4163   | -5.0615 | Down | 2.43E-09  | 6.69E-09  |
| Unigene114925 | Potri.018G114300.2  | 0.1337  | 4.465    | -5.0616 | Down | 2.43E-09  | 6.69E-09  |
| Unigene117501 | Potri.010G184900.3  | 0.1022  | 3.413    | -5.0616 | Down | 2.43E-09  | 6.69E-09  |
| Unigene105718 | Potri.005G166400.1  | 0.281   | 9.3841   | -5.0616 | Down | 3.36E-34  | 2.28E-33  |
| Unigene119551 | Potri.016G001500.1  | 0.2937  | 9.809    | -5.0617 | Down | 1.45E-83  | 2.49E-82  |
| Unigene106647 | Potri.018G024000.2  | 0.1587  | 5.301    | -5.0619 | Down | 6.04E-26  | 3.25E-25  |
| Unigene60051  | Potri.001G014400.1  | 0.2891  | 9.6569   | -5.0619 | Down | 1.14E-17  | 4.66E-17  |
| Unigene114701 | Potri.009G037900.1  | 0.1356  | 4.53     | -5.0621 | Down | 2.43E-09  | 6.69E-09  |
| Unigene110109 | Potri.002G093400.3  | 0.1695  | 5.6625   | -5.0621 | Down | 2.43E-09  | 6.69E-09  |
| Unigene40527  | Potri.017G055400.1  | 0.3703  | 12.3903  | -5.0644 | Down | 1.47E-149 | 5.25E-148 |
| Unigene71206  | Potri.T126100.1     | 1.4772  | 49.5352  | -5.0675 | Down | 1.97E-67  | 2.66E-66  |
| Unigene92850  | Potri.001G031800.10 | 25.9856 | 872.9076 | -5.07   | Down | 0         | 0         |
| Unigene117396 | Potri.011G146500.1  | 0.6234  | 21.0441  | -5.0771 | Down | 2.77E-51  | 2.78E-50  |
| Unigene116134 | Potri.T126700.1     | 0.3621  | 12.2246  | -5.0773 | Down | 3.00E-26  | 1.63E-25  |
| Unigene51856  | Potri.T128700.3     | 0.9236  | 31.2296  | -5.0795 | Down | 9.96E-110 | 2.39E-108 |
| Unigene6926   | Potri.014G026700.1  | 0.818   | 27.8476  | -5.0893 | Down | 2.17E-85  | 3.83E-84  |
| Unigene44726  | Potri.012G097400.1  | 0.7829  | 26.75    | -5.0946 | Down | 2.20E-237 | 1.41E-235 |
| Unigene47056  | Potri.001G052300.1  | 1.2736  | 43.5176  | -5.0946 | Down | 2.00E-60  | 2.40E-59  |

|               |                    |         |          |         |      |           |           |
|---------------|--------------------|---------|----------|---------|------|-----------|-----------|
| Unigene94122  | Potri.001G079000.1 | 17.4131 | 595.2633 | -5.0953 | Down | 0         | 0         |
| Unigene27153  | Potri.001G031800.3 | 3.7257  | 127.3976 | -5.0957 | Down | 0         | 0         |
| Unigene117204 | Potri.018G018700.1 | 0.1066  | 3.6741   | -5.1071 | Down | 1.21E-09  | 3.37E-09  |
| Unigene115240 | Potri.001G256100.3 | 0.2618  | 9.024    | -5.1072 | Down | 2.81E-18  | 1.17E-17  |
| Unigene99321  | Potri.012G016400.2 | 0.1188  | 4.0953   | -5.1074 | Down | 1.21E-09  | 3.37E-09  |
| Unigene47114  | Potri.007G060100.1 | 0.3158  | 10.8874  | -5.1075 | Down | 4.38E-78  | 6.98E-77  |
| Unigene27063  | Potri.003G193800.5 | 1.3998  | 48.2577  | -5.1075 | Down | 3.24E-146 | 1.12E-144 |
| Unigene96016  | Potri.011G165200.1 | 0.1235  | 4.258    | -5.1076 | Down | 1.21E-09  | 3.37E-09  |
| Unigene118054 | Potri.011G110100.1 | 0.1851  | 6.3818   | -5.1076 | Down | 2.81E-18  | 1.17E-17  |
| Unigene114972 | Potri.011G067400.1 | 0.1332  | 4.5926   | -5.1076 | Down | 1.21E-09  | 3.37E-09  |
| Unigene110944 | Potri.001G124200.1 | 0.4929  | 16.9946  | -5.1076 | Down | 7.38E-27  | 4.09E-26  |
| Unigene111706 | Potri.004G222300.1 | 0.3174  | 10.9441  | -5.1077 | Down | 2.81E-18  | 1.17E-17  |
| Unigene114047 | Potri.014G145300.4 | 0.1418  | 4.8895   | -5.1078 | Down | 1.21E-09  | 3.37E-09  |
| Unigene109143 | Potri.011G057900.1 | 0.1759  | 6.0657   | -5.1078 | Down | 1.21E-09  | 3.37E-09  |
| Unigene111798 | Potri.009G105600.1 | 0.158   | 5.4488   | -5.1079 | Down | 1.21E-09  | 3.37E-09  |
| Unigene106431 | Potri.001G045200.1 | 0.0966  | 3.3314   | -5.108  | Down | 1.21E-09  | 3.37E-09  |
| Unigene116226 | Potri.015G127100.2 | 0.1195  | 4.1216   | -5.1081 | Down | 1.21E-09  | 3.37E-09  |
| Unigene119263 | Potri.007G092800.2 | 0.5157  | 17.8395  | -5.1124 | Down | 2.17E-78  | 3.48E-77  |
| Unigene117473 | Potri.015G010000.1 | 0.5124  | 17.7742  | -5.1164 | Down | 2.88E-44  | 2.48E-43  |
| Unigene23436  | Potri.016G071900.1 | 2.1548  | 74.927   | -5.1199 | Down | 9.30E-251 | 6.42E-249 |
| Unigene119316 | Potri.015G145600.5 | 0.3851  | 13.3951  | -5.1203 | Down | 1.22E-61  | 1.49E-60  |
| Unigene52555  | Potri.001G052300.1 | 0.7153  | 24.8818  | -5.1204 | Down | 1.22E-61  | 1.49E-60  |
| Unigene113814 | Potri.013G133500.1 | 0.8608  | 29.9843  | -5.1224 | Down | 4.14E-53  | 4.31E-52  |
| Unigene107062 | Potri.014G037900.1 | 0.65    | 22.6771  | -5.1247 | Down | 1.08E-182 | 5.01E-181 |
| Unigene4718   | Potri.005G195600.1 | 3.3328  | 116.5829 | -5.1285 | Down | 0         | 0         |
| Unigene94531  | Potri.002G021600.1 | 0.1847  | 6.4654   | -5.1295 | Down | 1.39E-18  | 5.89E-18  |
| Unigene101889 | Potri.015G003900.1 | 0.2457  | 8.6017   | -5.1297 | Down | 2.05E-53  | 2.15E-52  |
| Unigene118108 | Potri.002G047000.1 | 0.1833  | 6.4178   | -5.1298 | Down | 1.39E-18  | 5.89E-18  |
| Unigene67887  | Potri.014G026700.1 | 0.7219  | 25.2778  | -5.1299 | Down | 2.05E-53  | 2.15E-52  |
| Unigene106717 | Potri.001G017700.1 | 0.2256  | 7.8993   | -5.1299 | Down | 2.05E-53  | 2.15E-52  |
| Unigene49328  | Potri.007G121100.1 | 1.5888  | 55.8354  | -5.1352 | Down | 3.24E-184 | 1.53E-182 |
| Unigene106128 | Potri.006G103200.1 | 0.4266  | 15.012   | -5.1371 | Down | 6.53E-80  | 1.07E-78  |
| Unigene99665  | Potri.016G036600.1 | 0.2443  | 8.5986   | -5.1374 | Down | 1.81E-27  | 1.02E-26  |
| Unigene61967  | Potri.017G098200.2 | 0.5828  | 20.5635  | -5.1409 | Down | 2.49E-36  | 1.78E-35  |
| Unigene117009 | Potri.006G137700.1 | 0.4375  | 15.4377  | -5.141  | Down | 2.49E-36  | 1.79E-35  |
| Unigene89981  | Potri.016G015500.1 | 6.9559  | 245.4556 | -5.1411 | Down | 0         | 0         |
| Unigene118031 | Potri.005G051000.1 | 0.3711  | 13.0952  | -5.1411 | Down | 2.49E-36  | 1.78E-35  |
| Unigene69694  | Potri.006G044300.1 | 4.0423  | 142.7268 | -5.1419 | Down | 0         | 0         |
| Unigene15583  | Potri.004G152300.1 | 11.5285 | 408.7137 | -5.1478 | Down | 0         | 0         |

|               |                    |         |          |         |      |           |           |
|---------------|--------------------|---------|----------|---------|------|-----------|-----------|
| Unigene46286  | Potri.008G065000.1 | 4.191   | 148.6627 | -5.1486 | Down | 0         | 0         |
| Unigene58359  | Potri.016G038000.3 | 8.1743  | 290.4732 | -5.1512 | Down | 0         | 0         |
| Unigene95539  | Potri.003G157300.1 | 0.1615  | 5.7407   | -5.1516 | Down | 5.97E-10  | 1.70E-09  |
| Unigene106222 | Potri.001G040800.1 | 0.1045  | 3.7146   | -5.1516 | Down | 5.97E-10  | 1.70E-09  |
| Unigene102095 | Potri.T128500.1    | 0.2188  | 7.7778   | -5.1517 | Down | 1.23E-36  | 8.91E-36  |
| Unigene107069 | Potri.007G038300.2 | 0.1324  | 4.7067   | -5.1517 | Down | 1.23E-36  | 8.91E-36  |
| Unigene104646 | Potri.005G144800.2 | 0.292   | 10.3805  | -5.1518 | Down | 1.23E-36  | 8.91E-36  |
| Unigene108241 | Potri.017G065900.1 | 0.3621  | 12.8749  | -5.152  | Down | 6.91E-19  | 2.95E-18  |
| Unigene110904 | Potri.005G028700.1 | 0.1643  | 5.8419   | -5.152  | Down | 5.97E-10  | 1.70E-09  |
| Unigene111990 | Potri.005G006700.1 | 0.1567  | 5.5719   | -5.1521 | Down | 5.97E-10  | 1.70E-09  |
| Unigene114722 | Potri.010G014300.1 | 0.1356  | 4.8222   | -5.1523 | Down | 5.97E-10  | 1.70E-09  |
| Unigene116750 | Potri.002G233200.1 | 0.113   | 4.0185   | -5.1523 | Down | 5.97E-10  | 1.70E-09  |
| Unigene117588 | Potri.005G096800.1 | 0.1005  | 3.5744   | -5.1524 | Down | 5.97E-10  | 1.70E-09  |
| Unigene94952  | Potri.005G065800.1 | 0.1087  | 3.8662   | -5.1525 | Down | 5.97E-10  | 1.70E-09  |
| Unigene60386  | Potri.001G399600.8 | 2.1416  | 76.5249  | -5.1592 | Down | 6.60E-108 | 1.55E-106 |
| Unigene77705  | Potri.002G026500.1 | 0.8039  | 28.9264  | -5.1692 | Down | 4.27E-46  | 3.84E-45  |
| Unigene117381 | Potri.001G034600.1 | 0.2084  | 7.5207   | -5.1734 | Down | 3.42E-19  | 1.48E-18  |
| Unigene118385 | Potri.013G055500.1 | 0.1711  | 6.1752   | -5.1736 | Down | 3.42E-19  | 1.48E-18  |
| Unigene118351 | Potri.010G120100.1 | 1.0385  | 37.4813  | -5.1736 | Down | 3.98E-109 | 9.49E-108 |
| Unigene116536 | Potri.010G189800.5 | 0.8109  | 29.3277  | -5.1766 | Down | 2.20E-64  | 2.83E-63  |
| Unigene93301  | Potri.013G141900.1 | 21.886  | 792.274  | -5.1779 | Down | 0         | 0         |
| Unigene83835  | Potri.006G152200.1 | 16.1221 | 583.6423 | -5.178  | Down | 0         | 0         |
| Unigene104722 | Potri.016G088000.2 | 0.2169  | 7.8657   | -5.1805 | Down | 2.21E-28  | 1.28E-27  |
| Unigene101907 | Potri.003G181800.1 | 0.4337  | 15.7314  | -5.1808 | Down | 1.18E-82  | 2.01E-81  |
| Unigene8787   | Potri.001G094800.1 | 0.5092  | 18.6182  | -5.1923 | Down | 3.80E-147 | 1.33E-145 |
| Unigene101587 | Potri.007G048800.2 | 0.0822  | 3.0095   | -5.1942 | Down | 2.95E-10  | 8.55E-10  |
| Unigene97691  | Potri.T043200.1    | 0.1387  | 5.0792   | -5.1946 | Down | 2.95E-10  | 8.55E-10  |
| Unigene98511  | Potri.014G116900.1 | 0.2454  | 8.9888   | -5.1949 | Down | 7.43E-38  | 5.54E-37  |
| Unigene47358  | Potri.014G020500.1 | 1.7406  | 63.7605  | -5.195  | Down | 3.32E-129 | 9.77E-128 |
| Unigene110749 | Potri.001G094800.1 | 0.4951  | 18.1367  | -5.195  | Down | 1.09E-28  | 6.40E-28  |
| Unigene98651  | Potri.006G019900.1 | 0.1348  | 4.9384   | -5.1952 | Down | 1.09E-28  | 6.40E-28  |
| Unigene116436 | Potri.017G086000.1 | 0.1169  | 4.2831   | -5.1953 | Down | 2.95E-10  | 8.55E-10  |
| Unigene114702 | Potri.005G046500.3 | 0.1356  | 4.9684   | -5.1954 | Down | 2.95E-10  | 8.55E-10  |
| Unigene107966 | Potri.003G167800.1 | 1.097   | 40.3822  | -5.2021 | Down | 1.84E-56  | 2.05E-55  |
| Unigene99983  | Potri.002G227800.1 | 0.197   | 7.2517   | -5.2021 | Down | 1.84E-56  | 2.05E-55  |
| Unigene119321 | Potri.010G226300.9 | 0.2188  | 8.0724   | -5.2053 | Down | 3.68E-38  | 2.76E-37  |
| Unigene75508  | Potri.001G079000.1 | 25.3164 | 935.3516 | -5.2074 | Down | 0         | 0         |
| Unigene118568 | Potri.019G014900.1 | 0.2454  | 9.0769   | -5.209  | Down | 5.41E-29  | 3.20E-28  |
| Unigene95016  | Potri.013G069800.1 | 0.1974  | 7.3354   | -5.2157 | Down | 8.39E-20  | 3.71E-19  |

|               |                     |         |          |         |      |           |           |
|---------------|---------------------|---------|----------|---------|------|-----------|-----------|
| Unigene108337 | Potri.T126100.1     | 1.2675  | 47.2079  | -5.219  | Down | 1.61E-66  | 2.15E-65  |
| Unigene119190 | Potri.009G144000.1  | 0.4884  | 18.2182  | -5.2212 | Down | 5.83E-76  | 9.00E-75  |
| Unigene106426 | Potri.006G280700.1  | 0.1288  | 4.8093   | -5.2226 | Down | 2.68E-29  | 1.59E-28  |
| Unigene102885 | Potri.003G059700.2  | 0.1828  | 6.8289   | -5.2233 | Down | 2.68E-29  | 1.59E-28  |
| Unigene118986 | Potri.003G181600.1  | 1.3815  | 51.7943  | -5.2285 | Down | 8.16E-189 | 3.96E-187 |
| Unigene65282  | Potri.016G083900.1  | 8.3386  | 312.6911 | -5.2288 | Down | 0         | 0         |
| Unigene106707 | Potri.008G025500.1  | 0.1823  | 6.8472   | -5.2311 | Down | 3.95E-67  | 5.32E-66  |
| Unigene106783 | Potri.T133000.1     | 0.0852  | 3.2111   | -5.2361 | Down | 1.46E-10  | 4.30E-10  |
| Unigene94900  | Potri.005G047400.1  | 0.1134  | 4.275    | -5.2364 | Down | 4.15E-20  | 1.86E-19  |
| Unigene115501 | Potri.013G122100.1  | 0.1282  | 4.8333   | -5.2365 | Down | 1.46E-10  | 4.30E-10  |
| Unigene117172 | Potri.002G200200.1  | 0.1072  | 4.0416   | -5.2365 | Down | 1.46E-10  | 4.30E-10  |
| Unigene117865 | Potri.019G108700.1  | 0.1918  | 7.2313   | -5.2366 | Down | 4.15E-20  | 1.86E-19  |
| Unigene117666 | Potri.011G001800.1  | 0.0992  | 3.7406   | -5.2368 | Down | 1.46E-10  | 4.30E-10  |
| Unigene116097 | Potri.010G163200.1  | 0.1211  | 4.5665   | -5.2368 | Down | 1.46E-10  | 4.30E-10  |
| Unigene102985 | Potri.004G097000.1  | 0.1332  | 5.0232   | -5.2369 | Down | 1.46E-10  | 4.30E-10  |
| Unigene115864 | Potri.018G126900.1  | 0.1239  | 4.6727   | -5.237  | Down | 1.46E-10  | 4.30E-10  |
| Unigene102748 | Potri.001G037900.3  | 0.1806  | 6.8111   | -5.237  | Down | 4.15E-20  | 1.86E-19  |
| Unigene116587 | Potri.015G044300.1  | 0.1151  | 4.341    | -5.2371 | Down | 1.46E-10  | 4.30E-10  |
| Unigene116188 | Potri.005G180100.2  | 0.1199  | 4.5225   | -5.2372 | Down | 1.46E-10  | 4.30E-10  |
| Unigene102070 | Potri.001G405200.3  | 0.0916  | 3.4557   | -5.2375 | Down | 1.46E-10  | 4.30E-10  |
| Unigene90143  | Potri.014G106800.10 | 22.4396 | 851.1957 | -5.2454 | Down | 0         | 0         |
| Unigene55009  | Potri.014G106800.10 | 6.8031  | 258.5501 | -5.2481 | Down | 0         | 0         |
| Unigene104466 | Potri.T121500.1     | 0.1996  | 7.5997   | -5.2508 | Down | 1.34E-58  | 1.55E-57  |
| Unigene118070 | Potri.017G094700.1  | 0.1847  | 7.0623   | -5.2569 | Down | 2.05E-20  | 9.27E-20  |
| Unigene117620 | Potri.019G119900.1  | 0.2     | 7.6492   | -5.2572 | Down | 2.05E-20  | 9.27E-20  |
| Unigene103787 | Potri.012G133600.4  | 0.479   | 18.3188  | -5.2572 | Down | 4.24E-78  | 6.77E-77  |
| Unigene94643  | Potri.013G118500.2  | 0.1483  | 5.6723   | -5.2573 | Down | 2.05E-20  | 9.27E-20  |
| Unigene97449  | Potri.010G154200.1  | 0.3335  | 12.7563  | -5.2574 | Down | 1.89E-116 | 4.90E-115 |
| Unigene117423 | Potri.014G150000.1  | 0.2066  | 7.9035   | -5.2576 | Down | 2.05E-20  | 9.27E-20  |
| Unigene103417 | Potri.001G162400.1  | 0.3725  | 14.2741  | -5.26   | Down | 1.17E-68  | 1.61E-67  |
| Unigene102212 | Potri.016G083900.1  | 0.7173  | 27.5307  | -5.2623 | Down | 2.10E-78  | 3.36E-77  |
| Unigene103677 | Potri.001G041000.1  | 0.1561  | 5.997    | -5.2637 | Down | 3.25E-30  | 1.98E-29  |
| Unigene118781 | Potri.007G021400.1  | 0.2288  | 8.7931   | -5.2642 | Down | 3.25E-30  | 1.98E-29  |
| Unigene93036  | Potri.003G141800.1  | 12.4097 | 477.9685 | -5.2674 | Down | 0         | 0         |
| Unigene25314  | Potri.006G232400.2  | 3.7192  | 143.6679 | -5.2716 | Down | 0         | 0         |
| Unigene119391 | Potri.016G047500.5  | 0.8651  | 33.442   | -5.2727 | Down | 2.42E-166 | 9.96E-165 |
| Unigene25563  | Potri.003G131200.1  | 1.1579  | 44.9076  | -5.2774 | Down | 9.36E-138 | 3.01E-136 |
| Unigene113765 | Potri.001G411000.2  | 0.144   | 5.5856   | -5.2776 | Down | 7.21E-11  | 2.16E-10  |
| Unigene116579 | Potri.013G053400.4  | 0.1151  | 4.465    | -5.2777 | Down | 7.21E-11  | 2.16E-10  |

|               |                    |         |           |         |      |           |           |
|---------------|--------------------|---------|-----------|---------|------|-----------|-----------|
| Unigene114613 | Potri.007G130300.1 | 0.1366  | 5.2991    | -5.2777 | Down | 7.21E-11  | 2.16E-10  |
| Unigene101953 | Potri.017G148200.1 | 0.0904  | 3.5071    | -5.2778 | Down | 1.02E-20  | 4.63E-20  |
| Unigene113617 | Potri.005G005000.1 | 0.1451  | 5.6291    | -5.2778 | Down | 7.21E-11  | 2.16E-10  |
| Unigene45895  | Potri.002G257700.1 | 0.946   | 36.8364   | -5.2831 | Down | 7.03E-70  | 9.85E-69  |
| Unigene105919 | Potri.012G083300.1 | 0.4877  | 19.1108   | -5.2923 | Down | 1.48E-188 | 7.18E-187 |
| Unigene103856 | Potri.002G114700.1 | 0.1933  | 7.5998    | -5.297  | Down | 5.02E-21  | 2.31E-20  |
| Unigene116898 | Potri.002G056000.1 | 0.2214  | 8.7048    | -5.2971 | Down | 5.02E-21  | 2.31E-20  |
| Unigene15698  | Potri.018G001800.5 | 0.2346  | 9.2249    | -5.2973 | Down | 5.02E-21  | 2.31E-20  |
| Unigene114666 | Potri.011G110200.1 | 0.6806  | 26.839    | -5.3014 | Down | 5.54E-51  | 5.52E-50  |
| Unigene106403 | Potri.007G002100.1 | 0.1754  | 6.9285    | -5.3038 | Down | 3.92E-31  | 2.46E-30  |
| Unigene42138  | Potri.011G147900.1 | 2.1758  | 86.0633   | -5.3058 | Down | 1.84E-210 | 1.01E-208 |
| Unigene66024  | Potri.006G020000.1 | 2.4866  | 98.88     | -5.3134 | Down | 1.01E-221 | 5.95E-220 |
| Unigene117189 | Potri.016G049300.1 | 0.1069  | 4.2603    | -5.3166 | Down | 3.56E-11  | 1.08E-10  |
| Unigene112264 | Potri.013G127900.1 | 0.1548  | 6.1695    | -5.3167 | Down | 3.56E-11  | 1.08E-10  |
| Unigene118701 | Potri.T037000.1    | 0.0787  | 3.1368    | -5.3168 | Down | 3.56E-11  | 1.08E-10  |
| Unigene104616 | Potri.004G055600.1 | 0.3473  | 13.8441   | -5.3169 | Down | 1.35E-51  | 1.37E-50  |
| Unigene118874 | Potri.016G119000.1 | 0.1457  | 5.808     | -5.317  | Down | 2.48E-21  | 1.15E-20  |
| Unigene89750  | Potri.003G141800.1 | 15.5158 | 623.701   | -5.329  | Down | 0         | 0         |
| Unigene80317  | Potri.001G079000.1 | 6.3424  | 255.2655  | -5.3308 | Down | 0         | 0         |
| Unigene103913 | Potri.005G144000.1 | 0.0996  | 4.0239    | -5.3363 | Down | 1.22E-21  | 5.75E-21  |
| Unigene119310 | Potri.001G321000.1 | 0.2207  | 8.9168    | -5.3364 | Down | 3.90E-42  | 3.22E-41  |
| Unigene1323   | Potri.001G071000.1 | 3.9055  | 158.0772  | -5.339  | Down | 0         | 0         |
| Unigene85026  | Potri.008G088300.2 | 6.3041  | 256.1099  | -5.3443 | Down | 0         | 0         |
| Unigene69560  | Potri.016G015500.1 | 9.8416  | 400.6857  | -5.3474 | Down | 0         | 0         |
| Unigene106919 | Potri.001G185600.1 | 0.272   | 11.0928   | -5.3499 | Down | 1.49E-73  | 2.22E-72  |
| Unigene10222  | Potri.010G125900.1 | 2.077   | 84.8458   | -5.3523 | Down | 3.90E-249 | 2.68E-247 |
| Unigene106524 | Potri.009G118800.1 | 0.0947  | 3.8757    | -5.3549 | Down | 1.76E-11  | 5.43E-11  |
| Unigene105965 | Potri.009G091000.1 | 0.1192  | 4.8787    | -5.355  | Down | 1.76E-11  | 5.43E-11  |
| Unigene94519  | Potri.005G039800.1 | 0.2449  | 10.0243   | -5.3552 | Down | 1.70E-63  | 2.15E-62  |
| Unigene115964 | Potri.001G222100.1 | 0.2454  | 10.0463   | -5.3554 | Down | 6.04E-22  | 2.87E-21  |
| Unigene115863 | Potri.004G105700.1 | 0.1239  | 5.0732    | -5.3556 | Down | 1.76E-11  | 5.43E-11  |
| Unigene112325 | Potri.001G378700.2 | 0.1541  | 6.3101    | -5.3557 | Down | 1.76E-11  | 5.43E-11  |
| Unigene94219  | Potri.014G053700.1 | 40.8298 | 1679.4213 | -5.3622 | Down | 0         | 0         |
| Unigene38085  | Potri.018G121600.3 | 0.3947  | 16.3186   | -5.3696 | Down | 3.89E-85  | 6.84E-84  |
| Unigene118966 | Potri.002G030500.1 | 0.6275  | 26.064    | -5.3763 | Down | 4.18E-96  | 8.49E-95  |
| Unigene36045  | Potri.010G125300.1 | 0.8332  | 34.6406   | -5.3777 | Down | 2.02E-180 | 9.25E-179 |
| Unigene41914  | Potri.002G144200.2 | 1.4783  | 61.503    | -5.3786 | Down | 1.99E-138 | 6.44E-137 |
| Unigene100921 | Potri.002G141200.1 | 0.1525  | 6.3508    | -5.3801 | Down | 5.69E-33  | 3.75E-32  |
| Unigene94563  | Potri.016G011400.2 | 0.3168  | 13.2244   | -5.3835 | Down | 1.14E-43  | 9.75E-43  |



|               |                     |         |          |         |      |           |           |
|---------------|---------------------|---------|----------|---------|------|-----------|-----------|
| Unigene25996  | Potri.002G055100.1  | 0.4774  | 19.9533  | -5.3853 | Down | 1.44E-255 | 1.02E-253 |
| Unigene93870  | Potri.009G083300.1  | 11.5718 | 484.8248 | -5.3888 | Down | 0         | 0         |
| Unigene61715  | Potri.019G131600.1  | 8.9775  | 376.6356 | -5.3907 | Down | 0         | 0         |
| Unigene48317  | Potri.002G040700.1  | 2.5987  | 109.0271 | -5.3908 | Down | 2.93E-182 | 1.36E-180 |
| Unigene106424 | Potri.008G032800.2  | 0.1003  | 4.213    | -5.3925 | Down | 8.67E-12  | 2.72E-11  |
| Unigene112310 | Potri.012G049000.3  | 0.1548  | 6.503    | -5.3926 | Down | 8.67E-12  | 2.72E-11  |
| Unigene109738 | Potri.003G000400.2  | 0.1719  | 7.2222   | -5.3928 | Down | 8.67E-12  | 2.72E-11  |
| Unigene116490 | Potri.016G008800.1  | 0.1162  | 4.8823   | -5.3929 | Down | 8.67E-12  | 2.72E-11  |
| Unigene109858 | Potri.013G146200.1  | 0.1711  | 7.1891   | -5.3929 | Down | 8.67E-12  | 2.72E-11  |
| Unigene109895 | Potri.010G128300.1  | 0.1711  | 7.1891   | -5.3929 | Down | 8.67E-12  | 2.72E-11  |
| Unigene104128 | Potri.014G147300.1  | 0.1751  | 7.3579   | -5.393  | Down | 8.67E-12  | 2.72E-11  |
| Unigene110344 | Potri.008G020900.1  | 0.168   | 7.0596   | -5.3931 | Down | 8.67E-12  | 2.72E-11  |
| Unigene112392 | Potri.014G073100.1  | 0.1541  | 6.4761   | -5.3932 | Down | 8.67E-12  | 2.72E-11  |
| Unigene110795 | Potri.018G041400.1  | 0.165   | 6.9346   | -5.3933 | Down | 8.67E-12  | 2.72E-11  |
| Unigene117070 | Potri.010G249400.1  | 0.1084  | 4.5559   | -5.3933 | Down | 8.67E-12  | 2.72E-11  |
| Unigene95603  | Potri.001G419200.1  | 0.1661  | 6.9809   | -5.3933 | Down | 1.47E-22  | 7.12E-22  |
| Unigene117062 | Potri.019G086300.1  | 0.1087  | 4.5692   | -5.3935 | Down | 8.67E-12  | 2.72E-11  |
| Unigene107093 | Potri.005G241500.1  | 0.3666  | 15.467   | -5.3988 | Down | 8.76E-205 | 4.68E-203 |
| Unigene115472 | Potri.007G080700.1  | 0.3859  | 16.3512  | -5.405  | Down | 1.39E-33  | 9.27E-33  |
| Unigene26237  | Potri.012G083300.1  | 1.6012  | 67.8886  | -5.4059 | Down | 2.09E-184 | 9.89E-183 |
| Unigene24729  | Potri.012G091500.2  | 1.052   | 44.6159  | -5.4064 | Down | 7.09E-120 | 1.91E-118 |
| Unigene95270  | Potri.T003700.1     | 0.1943  | 8.2673   | -5.4111 | Down | 1.38E-44  | 1.20E-43  |
| Unigene119142 | Potri.012G080200.1  | 0.1256  | 5.3445   | -5.4111 | Down | 7.26E-23  | 3.55E-22  |
| Unigene14923  | Potri.009G094100.1  | 6.2303  | 265.4268 | -5.4129 | Down | 0         | 0         |
| Unigene54385  | Potri.008G173800.1  | 4.8081  | 204.9289 | -5.4135 | Down | 0         | 0         |
| Unigene9830   | Potri.001G013400.1  | 4.7569  | 202.794  | -5.4138 | Down | 0         | 0         |
| Unigene3678   | Potri.002G039100.1  | 1.3815  | 59.0021  | -5.4165 | Down | 2.26E-153 | 8.34E-152 |
| Unigene5036   | Potri.015G024000.1  | 0.9932  | 42.563   | -5.4214 | Down | 1.77E-99  | 3.78E-98  |
| Unigene84418  | Potri.014G106800.10 | 21.0649 | 906.4799 | -5.4274 | Down | 0         | 0         |
| Unigene98575  | Potri.005G069000.1  | 0.1337  | 5.7613   | -5.4293 | Down | 3.58E-23  | 1.77E-22  |
| Unigene27181  | Potri.004G211700.1  | 0.4577  | 19.7228  | -5.4293 | Down | 3.35E-45  | 2.95E-44  |
| Unigene102973 | Potri.018G098700.3  | 0.1223  | 5.2702   | -5.4294 | Down | 4.27E-12  | 1.36E-11  |
| Unigene118134 | Potri.004G139000.1  | 0.0912  | 3.9301   | -5.4294 | Down | 4.27E-12  | 1.36E-11  |
| Unigene118146 | Potri.002G114700.1  | 0.1815  | 7.8219   | -5.4295 | Down | 3.58E-23  | 1.77E-22  |
| Unigene116826 | Potri.019G018800.1  | 0.112   | 4.8271   | -5.4296 | Down | 4.27E-12  | 1.36E-11  |
| Unigene101017 | Potri.010G129800.3  | 0.1665  | 7.1759   | -5.4296 | Down | 4.27E-12  | 1.36E-11  |
| Unigene111169 | Potri.001G039600.1  | 0.3243  | 13.9775  | -5.4296 | Down | 3.58E-23  | 1.77E-22  |
| Unigene119254 | Potri.017G090100.5  | 0.4035  | 17.4529  | -5.4348 | Down | 1.86E-78  | 2.98E-77  |
| Unigene119174 | Potri.012G007100.1  | 0.2474  | 10.7294  | -5.4386 | Down | 1.65E-45  | 1.47E-44  |

|               |                    |         |          |         |      |           |           |
|---------------|--------------------|---------|----------|---------|------|-----------|-----------|
| Unigene118708 | Potri.005G243900.1 | 0.1571  | 6.8526   | -5.4469 | Down | 1.76E-23  | 8.79E-23  |
| Unigene113419 | Potri.004G084000.1 | 0.2937  | 12.815   | -5.4473 | Down | 1.76E-23  | 8.80E-23  |
| Unigene94895  | Potri.002G144700.1 | 0.2847  | 12.4237  | -5.4475 | Down | 1.76E-23  | 8.79E-23  |
| Unigene22592  | Potri.004G015700.1 | 0.8386  | 36.6141  | -5.4483 | Down | 5.62E-235 | 3.54E-233 |
| Unigene117682 | Potri.019G042600.8 | 0.2968  | 13.0042  | -5.4533 | Down | 8.20E-35  | 5.65E-34  |
| Unigene98527  | Potri.007G021400.1 | 0.4268  | 18.7592  | -5.4579 | Down | 2.02E-57  | 2.29E-56  |
| Unigene117740 | Potri.007G094800.1 | 0.0982  | 4.3358   | -5.4644 | Down | 2.10E-12  | 6.81E-12  |
| Unigene62300  | Potri.016G083900.1 | 4.8162  | 212.7387 | -5.465  | Down | 0         | 0         |
| Unigene102467 | Potri.001G017600.1 | 0.151   | 6.6704   | -5.4652 | Down | 2.10E-12  | 6.81E-12  |
| Unigene91638  | Potri.T094100.1    | 13.9332 | 617.2298 | -5.4692 | Down | 0         | 0         |
| Unigene119133 | Potri.014G194800.1 | 0.6333  | 28.1092  | -5.472  | Down | 9.63E-115 | 2.45E-113 |
| Unigene1413   | Potri.014G053700.1 | 4.4503  | 198.2569 | -5.4773 | Down | 0         | 0         |
| Unigene54282  | Potri.T094200.1    | 18.0333 | 806.1949 | -5.4824 | Down | 0         | 0         |
| Unigene107119 | Potri.004G075700.4 | 0.2645  | 11.8276  | -5.4827 | Down | 4.81E-47  | 4.42E-46  |
| Unigene118948 | Potri.017G088900.1 | 0.141   | 6.3051   | -5.4828 | Down | 4.29E-24  | 2.18E-23  |
| Unigene90752  | Potri.019G085400.1 | 3.2269  | 144.3804 | -5.4836 | Down | 0         | 0         |
| Unigene116062 | Potri.001G414700.1 | 0.486   | 21.8597  | -5.4912 | Down | 2.37E-47  | 2.19E-46  |
| Unigene15296  | Potri.001G118400.1 | 4.6876  | 211.5315 | -5.4959 | Down | 0         | 0         |
| Unigene101502 | Potri.001G191100.1 | 0.1387  | 6.2743   | -5.4994 | Down | 1.04E-12  | 3.40E-12  |
| Unigene108906 | Potri.005G190100.1 | 0.5329  | 24.1111  | -5.4997 | Down | 4.84E-36  | 3.45E-35  |
| Unigene103940 | Potri.013G133800.1 | 0.0954  | 4.3166   | -5.4998 | Down | 1.04E-12  | 3.40E-12  |
| Unigene82558  | Potri.009G098500.1 | 0.4271  | 19.3257  | -5.4998 | Down | 4.84E-36  | 3.45E-35  |
| Unigene106067 | Potri.001G094800.1 | 0.224   | 10.1368  | -5.5    | Down | 2.11E-24  | 1.08E-23  |
| Unigene114707 | Potri.017G072900.1 | 0.1356  | 6.1374   | -5.5002 | Down | 1.04E-12  | 3.40E-12  |
| Unigene38516  | Potri.009G094100.1 | 2.1069  | 95.643   | -5.5045 | Down | 0         | 0         |
| Unigene91438  | Potri.012G090000.1 | 2.2149  | 100.988  | -5.5108 | Down | 3.16E-293 | 2.72E-291 |
| Unigene118847 | Potri.001G081900.1 | 0.3708  | 16.9369  | -5.5134 | Down | 7.04E-60  | 8.36E-59  |
| Unigene101887 | Potri.019G083700.1 | 0.1384  | 6.3372   | -5.5169 | Down | 1.04E-24  | 5.39E-24  |
| Unigene65370  | Potri.008G173800.1 | 3.2373  | 148.3062 | -5.5176 | Down | 2.54E-271 | 1.95E-269 |
| Unigene115508 | Potri.010G109400.1 | 0.8972  | 41.1519  | -5.5194 | Down | 1.11E-83  | 1.92E-82  |
| Unigene48152  | Potri.015G027700.1 | 1.0204  | 46.9031  | -5.5225 | Down | 1.83E-107 | 4.27E-106 |
| Unigene113807 | Potri.014G000300.1 | 0.1435  | 6.646    | -5.5334 | Down | 5.10E-13  | 1.70E-12  |
| Unigene117650 | Potri.008G213200.2 | 0.1995  | 9.2404   | -5.5335 | Down | 5.12E-25  | 2.68E-24  |
| Unigene109708 | Potri.019G093400.1 | 0.1719  | 7.963    | -5.5337 | Down | 5.10E-13  | 1.70E-12  |
| Unigene72745  | Potri.011G066900.4 | 0.8966  | 41.5376  | -5.5338 | Down | 8.41E-61  | 1.01E-59  |
| Unigene115922 | Potri.008G125500.2 | 0.3693  | 17.1086  | -5.5338 | Down | 5.78E-37  | 4.22E-36  |
| Unigene51359  | Potri.004G162600.1 | 1.1346  | 52.5616  | -5.5338 | Down | 1.70E-96  | 3.46E-95  |
| Unigene108510 | Potri.012G042200.6 | 0.1793  | 8.3075   | -5.534  | Down | 5.10E-13  | 1.70E-12  |
| Unigene116163 | Potri.003G182700.1 | 0.1203  | 5.5741   | -5.534  | Down | 5.10E-13  | 1.70E-12  |

|               |                     |         |           |         |      |           |           |
|---------------|---------------------|---------|-----------|---------|------|-----------|-----------|
| Unigene99902  | Potri.011G093500.1  | 0.1366  | 6.3295    | -5.5341 | Down | 5.10E-13  | 1.70E-12  |
| Unigene8761   | Potri.017G150100.1  | 0.079   | 3.6609    | -5.5342 | Down | 5.10E-13  | 1.70E-12  |
| Unigene103050 | Potri.014G085400.4  | 0.1661  | 7.6969    | -5.5342 | Down | 5.12E-25  | 2.68E-24  |
| Unigene94614  | Potri.010G095500.1  | 0.0894  | 4.1438    | -5.5345 | Down | 5.10E-13  | 1.70E-12  |
| Unigene41501  | Potri.014G106800.10 | 0.6869  | 31.8965   | -5.5372 | Down | 1.39E-120 | 3.77E-119 |
| Unigene73765  | Potri.001G013400.1  | 1.4075  | 65.3957   | -5.538  | Down | 8.35E-97  | 1.71E-95  |
| Unigene105867 | Potri.014G181100.1  | 0.0938  | 4.3976    | -5.551  | Down | 2.52E-25  | 1.33E-24  |
| Unigene47054  | Potri.008G010600.5  | 0.279   | 13.1278   | -5.5562 | Down | 1.40E-37  | 1.04E-36  |
| Unigene94397  | Potri.010G142800.1  | 22.2751 | 1048.4795 | -5.5567 | Down | 0         | 0         |
| Unigene108282 | Potri.015G095500.2  | 0.1811  | 8.5832    | -5.5667 | Down | 2.51E-13  | 8.49E-13  |
| Unigene102206 | Potri.013G109000.1  | 0.0992  | 4.7025    | -5.5669 | Down | 2.51E-13  | 8.49E-13  |
| Unigene116222 | Potri.010G109400.1  | 0.7173  | 34.0029   | -5.5669 | Down | 1.50E-74  | 2.25E-73  |
| Unigene94617  | Potri.017G127800.1  | 0.1567  | 7.4292    | -5.5671 | Down | 2.51E-13  | 8.49E-13  |
| Unigene118610 | Potri.014G165100.1  | 0.2427  | 11.5064   | -5.5671 | Down | 6.89E-38  | 5.14E-37  |
| Unigene116895 | Potri.008G072400.1  | 0.111   | 5.2623    | -5.5671 | Down | 2.51E-13  | 8.49E-13  |
| Unigene94686  | Potri.004G056300.1  | 0.1776  | 8.4198    | -5.5671 | Down | 2.51E-13  | 8.49E-13  |
| Unigene16040  | Potri.016G125200.1  | 0.3215  | 15.3581   | -5.578  | Down | 3.39E-38  | 2.55E-37  |
| Unigene111277 | Potri.T123700.1     | 0.3229  | 15.4826   | -5.5834 | Down | 6.10E-26  | 3.28E-25  |
| Unigene99478  | Potri.019G020200.1  | 0.1001  | 4.8006    | -5.5837 | Down | 6.10E-26  | 3.28E-25  |
| Unigene27890  | Potri.008G061800.1  | 1.3411  | 64.3866   | -5.5853 | Down | 2.91E-199 | 1.51E-197 |
| Unigene106996 | Potri.008G094100.3  | 0.0794  | 3.8475    | -5.5986 | Down | 1.23E-13  | 4.23E-13  |
| Unigene118950 | Potri.015G035800.1  | 0.1408  | 6.8239    | -5.5989 | Down | 3.00E-26  | 1.63E-25  |
| Unigene102832 | Potri.015G115700.1  | 0.0682  | 3.3059    | -5.5991 | Down | 1.23E-13  | 4.23E-13  |
| Unigene116897 | Potri.001G448000.1  | 0.2214  | 10.732    | -5.5991 | Down | 3.00E-26  | 1.63E-25  |
| Unigene111450 | Potri.014G005000.4  | 0.1601  | 7.7611    | -5.5992 | Down | 1.23E-13  | 4.23E-13  |
| Unigene105895 | Potri.011G050400.4  | 0.1304  | 6.3228    | -5.5995 | Down | 1.23E-13  | 4.23E-13  |
| Unigene97561  | Potri.017G059100.1  | 0.1158  | 5.6159    | -5.5998 | Down | 3.00E-26  | 1.63E-25  |
| Unigene116860 | Potri.008G071400.1  | 0.1113  | 5.398     | -5.5999 | Down | 1.23E-13  | 4.23E-13  |
| Unigene118648 | Potri.004G057500.1  | 0.1601  | 7.8473    | -5.6152 | Down | 1.48E-26  | 8.10E-26  |
| Unigene105159 | Potri.013G074500.1  | 0.1711  | 8.3873    | -5.6153 | Down | 1.48E-26  | 8.10E-26  |
| Unigene25846  | Potri.018G106600.1  | 0.2194  | 10.7555   | -5.6154 | Down | 1.48E-26  | 8.10E-26  |
| Unigene54444  | Potri.019G131600.2  | 11.8817 | 583.4146  | -5.6177 | Down | 0         | 0         |
| Unigene118886 | Potri.003G087700.1  | 0.0726  | 3.5963    | -5.6304 | Down | 6.06E-14  | 2.11E-13  |
| Unigene103689 | Potri.011G112700.3  | 0.1291  | 6.3963    | -5.6307 | Down | 6.06E-14  | 2.11E-13  |
| Unigene119014 | Potri.007G008000.1  | 0.2728  | 13.5175   | -5.6308 | Down | 1.38E-52  | 1.43E-51  |
| Unigene118259 | Potri.002G197800.1  | 0.0884  | 4.3804    | -5.6309 | Down | 6.06E-14  | 2.11E-13  |
| Unigene112348 | Potri.002G134300.1  | 0.4624  | 22.9155   | -5.631  | Down | 9.76E-40  | 7.60E-39  |
| Unigene105887 | Potri.002G065300.1  | 0.197   | 9.7633    | -5.6311 | Down | 9.76E-40  | 7.60E-39  |
| Unigene113246 | Potri.008G132700.1  | 0.148   | 7.3354    | -5.6312 | Down | 6.06E-14  | 2.11E-13  |

|               |                    |        |          |         |      |           |           |
|---------------|--------------------|--------|----------|---------|------|-----------|-----------|
| Unigene115897 | Potri.007G102200.2 | 0.3705 | 18.3628  | -5.6312 | Down | 9.76E-40  | 7.60E-39  |
| Unigene116634 | Potri.009G122600.2 | 0.1144 | 5.6703   | -5.6313 | Down | 6.06E-14  | 2.11E-13  |
| Unigene117775 | Potri.018G018100.2 | 0.0976 | 4.8391   | -5.6317 | Down | 6.06E-14  | 2.11E-13  |
| Unigene118489 | Potri.009G150200.1 | 0.0834 | 4.1354   | -5.6318 | Down | 6.06E-14  | 2.11E-13  |
| Unigene118552 | Potri.007G121100.1 | 1.3174 | 65.556   | -5.637  | Down | 2.85E-207 | 1.54E-205 |
| Unigene117469 | Potri.013G071000.2 | 0.2049 | 10.2671  | -5.647  | Down | 3.56E-27  | 1.99E-26  |
| Unigene114892 | Potri.016G007900.1 | 0.805  | 40.4743  | -5.6519 | Down | 1.76E-79  | 2.87E-78  |
| Unigene39801  | Potri.004G140000.3 | 0.5252 | 26.5497  | -5.6597 | Down | 0         | 0         |
| Unigene94618  | Potri.T093200.1    | 0.1273 | 6.4461   | -5.6621 | Down | 2.98E-14  | 1.05E-13  |
| Unigene112836 | Potri.013G100400.1 | 0.151  | 7.6466   | -5.6622 | Down | 2.98E-14  | 1.05E-13  |
| Unigene94555  | Potri.001G019700.1 | 0.1184 | 5.9959   | -5.6622 | Down | 1.75E-27  | 9.88E-27  |
| Unigene43437  | Potri.004G148400.1 | 1.3718 | 69.7435  | -5.6679 | Down | 4.65E-278 | 3.69E-276 |
| Unigene61186  | Potri.003G111500.3 | 3.7932 | 193.0933 | -5.6697 | Down | 0         | 0         |
| Unigene68705  | Potri.016G015500.1 | 2.3785 | 121.9534 | -5.6801 | Down | 6.09E-294 | 5.25E-292 |
| Unigene12593  | Potri.016G008500.1 | 0.6431 | 33.0993  | -5.6856 | Down | 3.55E-295 | 3.07E-293 |
| Unigene106851 | Potri.004G108300.3 | 0.4225 | 21.8158  | -5.6903 | Down | 4.56E-189 | 2.22E-187 |
| Unigene117596 | Potri.005G036600.2 | 0.1003 | 5.1852   | -5.692  | Down | 1.46E-14  | 5.22E-14  |
| Unigene96417  | Potri.T098800.1    | 0.13   | 6.7209   | -5.6921 | Down | 1.46E-14  | 5.22E-14  |
| Unigene5405   | Potri.012G091500.2 | 0.6165 | 31.8825  | -5.6925 | Down | 4.71E-55  | 5.10E-54  |
| Unigene116986 | Potri.001G464100.1 | 0.1097 | 5.6732   | -5.6925 | Down | 1.46E-14  | 5.22E-14  |
| Unigene99587  | Potri.017G015700.2 | 0.2543 | 13.1515  | -5.6926 | Down | 1.38E-41  | 1.12E-40  |
| Unigene111699 | Potri.001G168300.3 | 0.3174 | 16.4161  | -5.6927 | Down | 4.23E-28  | 2.43E-27  |
| Unigene103247 | Potri.016G092700.2 | 0.2784 | 14.4947  | -5.7022 | Down | 1.44E-82  | 2.45E-81  |
| Unigene46254  | Potri.004G057700.2 | 1.2523 | 65.2407  | -5.7031 | Down | 6.42E-191 | 3.16E-189 |
| Unigene102157 | Potri.008G155800.3 | 0.1177 | 6.1482   | -5.707  | Down | 2.08E-28  | 1.20E-27  |
| Unigene118810 | Potri.006G238600.1 | 0.6016 | 31.4352  | -5.7074 | Down | 4.67E-110 | 1.13E-108 |
| Unigene114991 | Potri.018G152200.3 | 0.5329 | 27.9861  | -5.7147 | Down | 5.58E-56  | 6.16E-55  |
| Unigene119545 | Potri.017G116300.1 | 0.5729 | 30.1389  | -5.7172 | Down | 1.11E-247 | 7.53E-246 |
| Unigene109496 | Potri.008G152300.2 | 0.1735 | 9.1585   | -5.7221 | Down | 7.17E-15  | 2.60E-14  |
| Unigene107386 | Potri.006G220000.1 | 0.1865 | 9.8454   | -5.7222 | Down | 7.17E-15  | 2.60E-14  |
| Unigene118856 | Potri.004G007400.1 | 0.0737 | 3.8915   | -5.7225 | Down | 7.17E-15  | 2.60E-14  |
| Unigene109718 | Potri.008G191800.1 | 0.3438 | 18.5185  | -5.7513 | Down | 2.46E-29  | 1.46E-28  |
| Unigene116095 | Potri.009G063100.1 | 0.1211 | 6.5236   | -5.7514 | Down | 3.52E-15  | 1.29E-14  |
| Unigene115648 | Potri.013G119700.2 | 0.1264 | 6.8111   | -5.7518 | Down | 3.52E-15  | 1.29E-14  |
| Unigene16182  | Potri.001G031800.3 | 0.6907 | 37.5275  | -5.7637 | Down | 1.23E-100 | 2.64E-99  |
| Unigene34669  | Potri.011G067500.1 | 0.8028 | 43.7114  | -5.7668 | Down | 3.81E-186 | 1.82E-184 |
| Unigene16692  | Potri.002G030500.1 | 0.3464 | 18.9107  | -5.7706 | Down | 1.15E-129 | 3.41E-128 |
| Unigene101195 | Potri.017G150900.1 | 0.3247 | 17.7996  | -5.7766 | Down | 2.77E-130 | 8.27E-129 |
| Unigene102295 | Potri.018G009300.1 | 0.076  | 4.174    | -5.7793 | Down | 1.73E-15  | 6.42E-15  |

|               |                    |        |          |         |      |           |           |
|---------------|--------------------|--------|----------|---------|------|-----------|-----------|
| Unigene114687 | Potri.018G149300.1 | 0.2723 | 14.9595  | -5.7797 | Down | 5.91E-30  | 3.58E-29  |
| Unigene99819  | Potri.013G140100.1 | 0.0974 | 5.351    | -5.7797 | Down | 1.73E-15  | 6.42E-15  |
| Unigene118191 | Potri.018G009200.1 | 0.0901 | 4.9504   | -5.7799 | Down | 1.73E-15  | 6.42E-15  |
| Unigene115267 | Potri.008G010600.5 | 0.7825 | 42.9954  | -5.7799 | Down | 1.65E-87  | 2.99E-86  |
| Unigene115195 | Potri.010G135200.1 | 0.1313 | 7.2164   | -5.7803 | Down | 1.73E-15  | 6.42E-15  |
| Unigene102553 | Potri.005G181700.1 | 0.1313 | 7.2164   | -5.7803 | Down | 1.73E-15  | 6.42E-15  |
| Unigene112655 | Potri.003G199000.2 | 0.1522 | 8.3651   | -5.7803 | Down | 1.73E-15  | 6.42E-15  |
| Unigene117772 | Potri.005G254100.2 | 0.0976 | 5.365    | -5.7806 | Down | 1.73E-15  | 6.42E-15  |
| Unigene107223 | Potri.016G073100.3 | 0.2532 | 13.9557  | -5.7844 | Down | 8.08E-88  | 1.47E-86  |
| Unigene119213 | Potri.005G158600.1 | 0.0597 | 3.3434   | -5.8074 | Down | 8.46E-16  | 3.19E-15  |
| Unigene118457 | Potri.T155700.3    | 0.0842 | 4.717    | -5.8079 | Down | 8.46E-16  | 3.19E-15  |
| Unigene118893 | Potri.006G137800.1 | 0.1443 | 8.0837   | -5.8079 | Down | 1.42E-30  | 8.77E-30  |
| Unigene94843  | Potri.011G071300.2 | 0.1665 | 9.3287   | -5.8081 | Down | 8.46E-16  | 3.19E-15  |
| Unigene19376  | Potri.T084300.2    | 0.7495 | 42.0852  | -5.8112 | Down | 2.92E-251 | 2.02E-249 |
| Unigene36766  | Potri.007G080700.1 | 0.4973 | 27.9957  | -5.8149 | Down | 2.51E-119 | 6.70E-118 |
| Unigene106438 | Potri.T089000.1    | 0.187  | 10.5751  | -5.8215 | Down | 6.98E-31  | 4.34E-30  |
| Unigene103944 | Potri.016G073700.1 | 0.2078 | 11.7533  | -5.8217 | Down | 6.98E-31  | 4.34E-30  |
| Unigene116076 | Potri.011G154200.1 | 0.486  | 27.4883  | -5.8217 | Down | 1.29E-60  | 1.55E-59  |
| Unigene41714  | Potri.011G151200.2 | 0.4967 | 28.0922  | -5.8217 | Down | 1.38E-149 | 4.95E-148 |
| Unigene118711 | Potri.018G117600.1 | 0.0784 | 4.4744   | -5.8347 | Down | 4.15E-16  | 1.59E-15  |
| Unigene107435 | Potri.013G048000.2 | 0.1856 | 10.5961  | -5.8352 | Down | 4.15E-16  | 1.59E-15  |
| Unigene99692  | Potri.004G003100.1 | 0.0665 | 3.7965   | -5.8352 | Down | 4.15E-16  | 1.59E-15  |
| Unigene119139 | Potri.004G148400.1 | 0.6301 | 35.9766  | -5.8353 | Down | 3.92E-151 | 1.42E-149 |
| Unigene99516  | Potri.T092600.1    | 0.1492 | 8.5193   | -5.8354 | Down | 4.15E-16  | 1.59E-15  |
| Unigene79425  | Potri.003G193800.5 | 2.1578 | 123.2125 | -5.8354 | Down | 5.24E-211 | 2.90E-209 |
| Unigene56606  | Potri.002G054100.3 | 0.1594 | 9.1018   | -5.8354 | Down | 4.15E-16  | 1.59E-15  |
| Unigene108748 | Potri.016G092700.2 | 0.3569 | 20.381   | -5.8356 | Down | 3.42E-31  | 2.15E-30  |
| Unigene103597 | Potri.005G043900.1 | 0.252  | 14.3906  | -5.8356 | Down | 3.42E-31  | 2.15E-30  |
| Unigene35116  | Potri.016G071900.1 | 1.3005 | 74.5416  | -5.8409 | Down | 0         | 0         |
| Unigene68993  | Potri.007G087700.1 | 2.0076 | 115.2052 | -5.8426 | Down | 2.25E-287 | 1.89E-285 |
| Unigene94342  | Potri.006G232400.1 | 3.6688 | 210.8955 | -5.8451 | Down | 0         | 0         |
| Unigene119080 | Potri.001G348100.1 | 0.7186 | 41.5224  | -5.8526 | Down | 2.86E-168 | 1.19E-166 |
| Unigene54760  | Potri.019G131600.2 | 4.1559 | 240.7754 | -5.8564 | Down | 0         | 0         |
| Unigene118404 | Potri.016G092700.2 | 0.0852 | 4.9543   | -5.8617 | Down | 2.03E-16  | 7.88E-16  |
| Unigene102023 | Potri.001G403700.3 | 0.085  | 4.9431   | -5.8618 | Down | 8.22E-32  | 5.25E-31  |
| Unigene107540 | Potri.008G218600.1 | 0.1856 | 10.796   | -5.8622 | Down | 2.03E-16  | 7.88E-16  |
| Unigene110689 | Potri.004G148400.1 | 0.3316 | 19.2889  | -5.8622 | Down | 8.22E-32  | 5.25E-31  |
| Unigene114964 | Potri.013G040000.1 | 0.1337 | 7.7778   | -5.8623 | Down | 2.03E-16  | 7.88E-16  |
| Unigene118028 | Potri.006G256900.1 | 0.093  | 5.4115   | -5.8627 | Down | 2.03E-16  | 7.88E-16  |

|               |                    |         |           |         |      |           |           |
|---------------|--------------------|---------|-----------|---------|------|-----------|-----------|
| Unigene7266   | Potri.016G015500.1 | 5.1041  | 297.4763  | -5.865  | Down | 0         | 0         |
| Unigene117126 | Potri.006G238600.1 | 0.7524  | 44.2385   | -5.8777 | Down | 1.31E-109 | 3.14E-108 |
| Unigene59609  | Potri.011G150100.1 | 0.7803  | 45.9019   | -5.8784 | Down | 1.04E-78  | 1.67E-77  |
| Unigene119207 | Potri.015G102200.1 | 0.06    | 3.5534    | -5.8881 | Down | 9.96E-17  | 3.91E-16  |
| Unigene104528 | Potri.007G007400.1 | 0.0639  | 3.7846    | -5.8882 | Down | 9.96E-17  | 3.91E-16  |
| Unigene110218 | Potri.013G108200.1 | 0.1688  | 10.0008   | -5.8887 | Down | 9.96E-17  | 3.91E-16  |
| Unigene46509  | Potri.012G090000.1 | 1.2601  | 74.94     | -5.8941 | Down | 6.06E-158 | 2.32E-156 |
| Unigene94338  | Potri.001G366500.1 | 8.2296  | 491.7505  | -5.901  | Down | 0         | 0         |
| Unigene105622 | Potri.005G034300.1 | 0.1175  | 7.0878    | -5.9146 | Down | 4.74E-33  | 3.13E-32  |
| Unigene31753  | Potri.003G167800.1 | 0.5713  | 34.4696   | -5.9149 | Down | 1.04E-112 | 2.59E-111 |
| Unigene114034 | Potri.004G046600.1 | 0.2836  | 17.1131   | -5.9151 | Down | 4.74E-33  | 3.13E-32  |
| Unigene31485  | Potri.004G148400.1 | 1.0259  | 62.2121   | -5.9222 | Down | 2.98E-225 | 1.79E-223 |
| Unigene118310 | Potri.018G094800.1 | 0.2627  | 15.942    | -5.9233 | Down | 2.53E-49  | 2.44E-48  |
| Unigene37488  | Potri.001G167900.1 | 0.4741  | 28.7767   | -5.9236 | Down | 2.53E-49  | 2.44E-48  |
| Unigene116037 | Potri.014G023100.1 | 0.7314  | 44.6502   | -5.9319 | Down | 4.91E-98  | 1.02E-96  |
| Unigene101507 | Potri.T044700.1    | 0.1522  | 9.2945    | -5.9323 | Down | 1.24E-49  | 1.20E-48  |
| Unigene102065 | Potri.006G085900.1 | 0.1018  | 6.2498    | -5.94   | Down | 1.14E-33  | 7.61E-33  |
| Unigene118172 | Potri.019G088200.1 | 0.0903  | 5.5461    | -5.9406 | Down | 2.39E-17  | 9.60E-17  |
| Unigene115804 | Potri.T044700.1    | 0.1247  | 7.6607    | -5.9409 | Down | 2.39E-17  | 9.60E-17  |
| Unigene118350 | Potri.003G057900.1 | 0.0865  | 5.3145    | -5.9411 | Down | 2.39E-17  | 9.60E-17  |
| Unigene60428  | Potri.011G150100.1 | 3.5991  | 221.5474  | -5.9438 | Down | 0         | 0         |
| Unigene114430 | Potri.018G152200.3 | 0.6933  | 42.8742   | -5.9505 | Down | 4.77E-83  | 8.15E-82  |
| Unigene118533 | Potri.017G041500.1 | 0.165   | 10.2241   | -5.9534 | Down | 5.56E-34  | 3.76E-33  |
| Unigene4535   | Potri.013G037500.1 | 0.2329  | 14.4824   | -5.9584 | Down | 1.99E-116 | 5.16E-115 |
| Unigene103018 | Potri.006G137700.1 | 0.3506  | 21.9055   | -5.9653 | Down | 5.60E-84  | 9.70E-83  |
| Unigene101724 | Potri.018G146200.1 | 0.0827  | 5.1679    | -5.9655 | Down | 1.17E-17  | 4.76E-17  |
| Unigene101259 | Potri.007G097500.2 | 0.1264  | 7.9008    | -5.9659 | Down | 1.17E-17  | 4.76E-17  |
| Unigene117635 | Potri.001G407000.1 | 0.0997  | 6.2319    | -5.9659 | Down | 1.17E-17  | 4.76E-17  |
| Unigene117549 | Potri.005G190100.1 | 0.3032  | 19.058    | -5.974  | Down | 3.49E-51  | 3.49E-50  |
| Unigene64395  | Potri.006G261200.1 | 0.9097  | 57.3374   | -5.9779 | Down | 1.91E-101 | 4.16E-100 |
| Unigene119204 | Potri.004G151200.1 | 0.0602  | 3.8241    | -5.9892 | Down | 5.71E-18  | 2.36E-17  |
| Unigene95725  | Potri.T015100.3    | 0.0846  | 5.3763    | -5.9898 | Down | 5.71E-18  | 2.36E-17  |
| Unigene116875 | Potri.007G102200.1 | 0.222   | 14.1127   | -5.9903 | Down | 6.52E-35  | 4.50E-34  |
| Unigene116166 | Potri.010G230700.1 | 0.1203  | 7.6482    | -5.9904 | Down | 5.71E-18  | 2.36E-17  |
| Unigene104411 | Potri.008G079500.1 | 0.0767  | 4.8785    | -5.9911 | Down | 5.71E-18  | 2.36E-17  |
| Unigene118727 | Potri.019G006900.1 | 0.3115  | 19.8829   | -5.9962 | Down | 5.54E-69  | 7.66E-68  |
| Unigene54298  | Potri.001G102400.1 | 19.3354 | 1235.9906 | -5.9983 | Down | 0         | 0         |
| Unigene100764 | Potri.010G152000.1 | 0.2188  | 14.0236   | -6.0021 | Down | 2.62E-103 | 5.83E-102 |
| Unigene89204  | Potri.004G152300.1 | 2.3445  | 150.2927  | -6.0024 | Down | 0         | 0         |

|               |                    |         |           |         |      |           |           |
|---------------|--------------------|---------|-----------|---------|------|-----------|-----------|
| Unigene118289 | Potri.019G086200.1 | 0.0878  | 5.6732    | -6.0138 | Down | 2.80E-18  | 1.17E-17  |
| Unigene116924 | Potri.018G087700.1 | 0.1104  | 7.1335    | -6.0138 | Down | 2.80E-18  | 1.17E-17  |
| Unigene104032 | Potri.011G082300.1 | 0.0878  | 5.6732    | -6.0138 | Down | 2.80E-18  | 1.17E-17  |
| Unigene14478  | Potri.010G109400.1 | 0.7668  | 49.9807   | -6.0264 | Down | 1.50E-243 | 9.99E-242 |
| Unigene117282 | Potri.008G205000.1 | 0.1054  | 6.9246    | -6.0378 | Down | 1.37E-18  | 5.77E-18  |
| Unigene102312 | Potri.013G025900.1 | 0.1468  | 9.6508    | -6.0387 | Down | 3.74E-36  | 2.67E-35  |
| Unigene105000 | Potri.005G027600.2 | 0.0587  | 3.8603    | -6.0392 | Down | 1.37E-18  | 5.77E-18  |
| Unigene60632  | Potri.001G118400.1 | 0.5127  | 33.971    | -6.05   | Down | 8.90E-72  | 1.29E-70  |
| Unigene118794 | Potri.T084300.3    | 0.3026  | 20.1334   | -6.056  | Down | 4.35E-72  | 6.32E-71  |
| Unigene118401 | Potri.003G141800.1 | 0.5975  | 39.8174   | -6.0583 | Down | 1.99E-125 | 5.65E-124 |
| Unigene105424 | Potri.010G131600.1 | 0.074   | 4.9434    | -6.0618 | Down | 6.68E-19  | 2.86E-18  |
| Unigene102558 | Potri.008G182200.2 | 0.144   | 9.6196    | -6.0618 | Down | 6.68E-19  | 2.86E-18  |
| Unigene76155  | Potri.008G173800.1 | 3.1638  | 213.8427  | -6.0787 | Down | 0         | 0         |
| Unigene114698 | Potri.009G113600.1 | 0.5445  | 36.812    | -6.0791 | Down | 2.49E-73  | 3.69E-72  |
| Unigene97471  | Potri.014G010700.1 | 0.0846  | 5.7407    | -6.0844 | Down | 3.27E-19  | 1.41E-18  |
| Unigene114200 | Potri.007G138800.3 | 0.1402  | 9.5175    | -6.085  | Down | 3.27E-19  | 1.41E-18  |
| Unigene118326 | Potri.008G088300.2 | 0.2614  | 17.8392   | -6.0926 | Down | 7.68E-56  | 8.45E-55  |
| Unigene16607  | Potri.019G131600.2 | 5.2907  | 362.8069  | -6.0996 | Down | 0         | 0         |
| Unigene26118  | Potri.016G071900.1 | 0.9564  | 65.6506   | -6.1011 | Down | 1.82E-129 | 5.37E-128 |
| Unigene106556 | Potri.011G166300.1 | 0.0947  | 6.5275    | -6.107  | Down | 1.60E-19  | 6.98E-19  |
| Unigene106265 | Potri.013G055500.1 | 0.073   | 5.033     | -6.1074 | Down | 1.60E-19  | 6.98E-19  |
| Unigene9235   | Potri.001G118400.1 | 1.0752  | 74.1332   | -6.1074 | Down | 2.16E-240 | 1.41E-238 |
| Unigene116650 | Potri.003G131200.1 | 0.2281  | 15.73     | -6.1077 | Down | 5.10E-38  | 3.82E-37  |
| Unigene102260 | Potri.011G152000.1 | 0.1282  | 8.907     | -6.1185 | Down | 2.49E-38  | 1.88E-37  |
| Unigene30003  | Potri.001G017900.1 | 0.428   | 29.7766   | -6.1204 | Down | 2.48E-131 | 7.48E-130 |
| Unigene118132 | Potri.015G008100.2 | 0.1824  | 12.8711   | -6.1409 | Down | 5.96E-39  | 4.56E-38  |
| Unigene112681 | Potri.014G106300.1 | 0.1522  | 10.8254   | -6.1523 | Down | 3.81E-20  | 1.70E-19  |
| Unigene119281 | Potri.006G038900.1 | 0.3401  | 24.5508   | -6.1737 | Down | 2.73E-117 | 7.13E-116 |
| Unigene102489 | Potri.017G018700.1 | 0.2247  | 16.4614   | -6.1949 | Down | 1.66E-40  | 1.31E-39  |
| Unigene95637  | Potri.005G218200.2 | 0.0721  | 5.2855    | -6.1959 | Down | 9.09E-21  | 4.15E-20  |
| Unigene117660 | Potri.009G113600.1 | 0.3979  | 29.362    | -6.2054 | Down | 1.75E-80  | 2.89E-79  |
| Unigene113833 | Potri.010G139500.1 | 0.2869  | 21.1745   | -6.2056 | Down | 8.09E-41  | 6.47E-40  |
| Unigene111115 | Potri.001G291800.1 | 0.1629  | 12.1082   | -6.2159 | Down | 4.44E-21  | 2.05E-20  |
| Unigene113464 | Potri.008G142400.5 | 0.1463  | 11.0312   | -6.2365 | Down | 2.16E-21  | 1.01E-20  |
| Unigene58779  | Potri.003G167800.1 | 0.1584  | 12.1153   | -6.2571 | Down | 2.24E-42  | 1.86E-41  |
| Unigene85873  | Potri.001G107600.1 | 13.9556 | 1076.3894 | -6.2692 | Down | 0         | 0         |
| Unigene117147 | Potri.T084300.2    | 0.3215  | 24.8271   | -6.271  | Down | 1.28E-63  | 1.62E-62  |
| Unigene119234 | Potri.007G102100.1 | 0.4099  | 31.9211   | -6.2831 | Down | 3.87E-148 | 1.37E-146 |
| Unigene115542 | Potri.002G073900.1 | 0.2564  | 20.1616   | -6.2971 | Down | 1.27E-43  | 1.08E-42  |

|               |                    |        |          |         |      |           |           |
|---------------|--------------------|--------|----------|---------|------|-----------|-----------|
| Unigene119442 | Potri.018G063900.2 | 0.1422 | 11.3356  | -6.3168 | Down | 8.40E-66  | 1.11E-64  |
| Unigene119452 | Potri.T098100.1    | 0.0466 | 3.7171   | -6.3177 | Down | 1.23E-22  | 5.94E-22  |
| Unigene113707 | Potri.001G031800.3 | 0.7229 | 57.7857  | -6.3208 | Down | 3.61E-109 | 8.60E-108 |
| Unigene103009 | Potri.002G160200.1 | 0.1304 | 10.5381  | -6.3365 | Down | 5.98E-23  | 2.93E-22  |
| Unigene117543 | Potri.004G160100.1 | 0.1014 | 8.2991   | -6.3548 | Down | 2.92E-23  | 1.44E-22  |
| Unigene114737 | Potri.005G135300.1 | 0.1356 | 11.1057  | -6.3558 | Down | 2.92E-23  | 1.44E-22  |
| Unigene94566  | Potri.003G200200.2 | 0.1371 | 11.2282  | -6.3558 | Down | 2.92E-23  | 1.44E-22  |
| Unigene110923 | Potri.001G167900.1 | 0.1643 | 13.6311  | -6.3744 | Down | 1.42E-23  | 7.10E-23  |
| Unigene114957 | Potri.013G066100.1 | 0.4011 | 33.7037  | -6.3928 | Down | 1.52E-69  | 2.12E-68  |
| Unigene73834  | Potri.011G147900.1 | 0.7005 | 58.8628  | -6.3928 | Down | 2.51E-92  | 4.84E-91  |
| Unigene116029 | Potri.004G061900.1 | 0.1219 | 10.2433  | -6.3928 | Down | 6.93E-24  | 3.50E-23  |
| Unigene119178 | Potri.005G151400.1 | 0.0617 | 5.3137   | -6.4283 | Down | 1.64E-24  | 8.48E-24  |
| Unigene99049  | Potri.001G303600.1 | 0.1137 | 9.9238   | -6.4476 | Down | 8.01E-25  | 4.17E-24  |
| Unigene102018 | Potri.014G111200.2 | 0.1786 | 15.7149  | -6.4593 | Down | 1.01E-144 | 3.44E-143 |
| Unigene107235 | Potri.019G116000.1 | 0.1996 | 17.6012  | -6.4624 | Down | 4.92E-145 | 1.68E-143 |
| Unigene113653 | Potri.016G071900.1 | 0.5783 | 51.0882  | -6.465  | Down | 2.54E-97  | 5.26E-96  |
| Unigene106385 | Potri.015G102700.1 | 0.1015 | 9.0212   | -6.4738 | Down | 1.50E-49  | 1.45E-48  |
| Unigene119202 | Potri.001G265500.1 | 0.0602 | 5.3796   | -6.4816 | Down | 1.90E-25  | 1.01E-24  |
| Unigene112066 | Potri.012G091500.2 | 0.1561 | 13.9555  | -6.4822 | Down | 1.90E-25  | 1.01E-24  |
| Unigene112802 | Potri.015G066000.1 | 0.151  | 13.5035  | -6.4826 | Down | 1.90E-25  | 1.01E-24  |
| Unigene104270 | Potri.005G181700.1 | 0.1486 | 13.2883  | -6.4826 | Down | 1.90E-25  | 1.01E-24  |
| Unigene119451 | Potri.004G055000.1 | 0.0934 | 8.3992   | -6.4907 | Down | 3.55E-50  | 3.49E-49  |
| Unigene118386 | Potri.006G157900.5 | 0.0855 | 7.7421   | -6.5007 | Down | 9.26E-26  | 4.96E-25  |
| Unigene119507 | Potri.006G087600.1 | 0.0383 | 3.4692   | -6.5011 | Down | 9.26E-26  | 4.95E-25  |
| Unigene119532 | Potri.006G050400.1 | 0.1717 | 15.6152  | -6.5069 | Down | 4.37E-125 | 1.24E-123 |
| Unigene25113  | Potri.001G162500.1 | 0.4045 | 38.3454  | -6.5668 | Down | 3.24E-234 | 2.03E-232 |
| Unigene118468 | Potri.015G124000.1 | 0.252  | 24.1654  | -6.5834 | Down | 7.46E-80  | 1.22E-78  |
| Unigene102876 | Potri.015G029200.2 | 0.1351 | 13.1039  | -6.5998 | Down | 1.23E-27  | 6.98E-27  |
| Unigene107029 | Potri.019G042600.8 | 0.1437 | 14.1693  | -6.6236 | Down | 3.54E-55  | 3.83E-54  |
| Unigene74050  | Potri.011G150100.1 | 2.7888 | 276.0386 | -6.6291 | Down | 0         | 0         |
| Unigene105561 | Potri.009G140800.2 | 0.0535 | 5.3042   | -6.6315 | Down | 2.91E-28  | 1.68E-27  |
| Unigene117368 | Potri.002G144200.3 | 0.2084 | 20.7661  | -6.6387 | Down | 8.37E-56  | 9.21E-55  |
| Unigene118360 | Potri.018G130000.2 | 0.0863 | 8.651    | -6.6474 | Down | 1.42E-28  | 8.26E-28  |
| Unigene107728 | Potri.004G097100.1 | 0.1847 | 18.7     | -6.6617 | Down | 6.90E-29  | 4.06E-28  |
| Unigene106814 | Potri.019G086300.1 | 0.054  | 5.5247   | -6.6768 | Down | 3.35E-29  | 1.99E-28  |
| Unigene105851 | Potri.009G137400.1 | 0.0767 | 7.8551   | -6.6783 | Down | 3.35E-29  | 1.99E-28  |
| Unigene119512 | Potri.018G088100.1 | 0.2249 | 23.1418  | -6.6851 | Down | 1.13E-170 | 4.80E-169 |
| Unigene118060 | Potri.018G149300.1 | 0.277  | 28.8458  | -6.7023 | Down | 4.74E-87  | 8.55E-86  |
| Unigene118400 | Potri.004G234100.1 | 0.0854 | 9.0118   | -6.7214 | Down | 3.86E-30  | 2.35E-29  |



|               |                    |        |          |         |      |           |           |
|---------------|--------------------|--------|----------|---------|------|-----------|-----------|
| Unigene118659 | Potri.015G027800.1 | 0.3188 | 34.0887  | -6.7405 | Down | 6.68E-119 | 1.78E-117 |
| Unigene107301 | Potri.014G146100.1 | 0.373  | 41.1898  | -6.787  | Down | 4.57E-62  | 5.64E-61  |
| Unigene94649  | Potri.019G077000.2 | 0.1474 | 16.6777  | -6.822  | Down | 2.47E-32  | 1.60E-31  |
| Unigene79960  | Potri.004G057700.2 | 0.7612 | 88.7355  | -6.8651 | Down | 2.45E-162 | 9.77E-161 |
| Unigene104889 | Potri.008G191900.3 | 0.0723 | 8.5666   | -6.8886 | Down | 6.68E-34  | 4.50E-33  |
| Unigene95965  | Potri.001G076700.2 | 0.1258 | 15.2473  | -6.9213 | Down | 2.45E-68  | 3.35E-67  |
| Unigene118583 | Potri.002G144200.3 | 0.2449 | 29.8092  | -6.9274 | Down | 2.08E-102 | 4.59E-101 |
| Unigene117835 | Potri.008G152300.2 | 0.0964 | 11.8375  | -6.9401 | Down | 3.71E-35  | 2.58E-34  |
| Unigene117735 | Potri.001G463300.1 | 0.0982 | 12.3728  | -6.9772 | Down | 4.25E-36  | 3.03E-35  |
| Unigene56561  | Potri.015G087800.1 | 1.9083 | 240.5505 | -6.9779 | Down | 0         | 0         |
| Unigene112574 | Potri.005G176100.2 | 0.1529 | 19.4338  | -6.9898 | Down | 2.06E-36  | 1.48E-35  |
| Unigene119459 | Potri.007G006100.1 | 0.0914 | 12.1147  | -7.0503 | Down | 6.28E-75  | 9.55E-74  |
| Unigene106218 | Potri.001G195800.1 | 0.0969 | 12.8906  | -7.0556 | Down | 3.05E-75  | 4.66E-74  |
| Unigene87695  | Potri.015G087800.1 | 2.2147 | 299.003  | -7.0769 | Down | 0         | 0         |
| Unigene35436  | Potri.004G108300.3 | 0.6573 | 89.0448  | -7.0818 | Down | 3.76E-152 | 1.38E-150 |
| Unigene100036 | Potri.005G223200.1 | 0.1163 | 16.166   | -7.119  | Down | 1.77E-117 | 4.65E-116 |
| Unigene115013 | Potri.001G162500.1 | 0.2655 | 37.039   | -7.1242 | Down | 5.18E-79  | 8.38E-78  |
| Unigene117554 | Potri.004G057700.2 | 0.3032 | 42.5811  | -7.1338 | Down | 9.82E-119 | 2.61E-117 |
| Unigene114301 | Potri.016G008500.1 | 0.1397 | 19.8668  | -7.1519 | Down | 8.26E-41  | 6.60E-40  |
| Unigene95657  | Potri.015G070200.1 | 0.079  | 11.2382  | -7.1523 | Down | 8.26E-41  | 6.60E-40  |
| Unigene96018  | Potri.007G105300.1 | 0.0451 | 6.657    | -7.2056 | Down | 2.21E-42  | 1.83E-41  |
| Unigene47078  | Potri.011G150100.1 | 1.3321 | 197.1424 | -7.2094 | Down | 0         | 0         |
| Unigene104980 | Potri.009G092300.1 | 0.0935 | 14.6036  | -7.2871 | Down | 6.75E-45  | 5.90E-44  |
| Unigene119431 | Potri.T126700.1    | 0.144  | 22.8078  | -7.3073 | Down | 1.87E-134 | 5.81E-133 |
| Unigene92650  | Potri.015G087800.1 | 2.7237 | 438.2062 | -7.3299 | Down | 0         | 0         |
| Unigene118664 | Potri.014G050400.1 | 0.1591 | 25.7905  | -7.3408 | Down | 3.22E-92  | 6.20E-91  |
| Unigene114601 | Potri.007G102100.1 | 0.2733 | 44.3068  | -7.3409 | Down | 3.22E-92  | 6.20E-91  |
| Unigene110505 | Potri.003G131200.1 | 0.1665 | 27.2685  | -7.3556 | Down | 4.23E-47  | 3.89E-46  |
| Unigene118574 | Potri.004G108300.1 | 0.4908 | 80.4585  | -7.357  | Down | 2.02E-277 | 1.60E-275 |
| Unigene91338  | Potri.013G154700.2 | 4.8418 | 808.4375 | -7.3834 | Down | 0         | 0         |
| Unigene114208 | Potri.017G009400.1 | 0.1402 | 23.4162  | -7.3839 | Down | 4.81E-48  | 4.52E-47  |
| Unigene115796 | Potri.002G030500.1 | 0.1247 | 20.9662  | -7.3935 | Down | 2.33E-48  | 2.20E-47  |
| Unigene100892 | Potri.003G002800.1 | 0.0731 | 12.4373  | -7.4106 | Down | 1.02E-192 | 5.09E-191 |
| Unigene116459 | Potri.004G057700.1 | 0.1166 | 20.0926  | -7.429  | Down | 1.28E-49  | 1.24E-48  |
| Unigene108403 | Potri.003G066400.1 | 0.1802 | 31.6434  | -7.4562 | Down | 1.46E-50  | 1.44E-49  |
| Unigene103534 | Potri.008G203400.6 | 0.0696 | 12.5954  | -7.4996 | Down | 3.88E-52  | 3.96E-51  |
| Unigene104478 | Potri.003G175900.1 | 0.0528 | 9.904    | -7.5513 | Down | 5.00E-54  | 5.29E-53  |
| Unigene95012  | Potri.011G045700.1 | 0.0949 | 18.0987  | -7.5753 | Down | 5.67E-55  | 6.12E-54  |
| Unigene103583 | Potri.003G066400.3 | 0.1025 | 20.5342  | -7.6463 | Down | 8.27E-58  | 9.44E-57  |

|               |                    |        |          |          |      |           |           |
|---------------|--------------------|--------|----------|----------|------|-----------|-----------|
| Unigene119509 | Potri.014G066300.1 | 0.0764 | 16       | -7.7103  | Down | 6.13E-120 | 1.65E-118 |
| Unigene119559 | Potri.014G041900.1 | 0.0251 | 5.4282   | -7.7566  | Down | 1.54E-62  | 1.91E-61  |
| Unigene108163 | Potri.T131500.1    | 0.5458 | 139.178  | -7.9943  | Down | 3.00E-219 | 1.74E-217 |
| Unigene105779 | Potri.014G165100.1 | 0.0571 | 14.5848  | -7.9968  | Down | 6.73E-74  | 1.00E-72  |
| Unigene90716  | Potri.013G154700.1 | 1.7171 | 469.6839 | -8.0956  | Down | 0         | 0         |
| Unigene116764 | Potri.004G216900.1 | 0.1127 | 33.1437  | -8.2001  | Down | 2.87E-85  | 5.07E-84  |
| Unigene119344 | Potri.003G050200.1 | 0.1064 | 32.8475  | -8.2701  | Down | 5.00E-178 | 2.24E-176 |
| Unigene119398 | Potri.002G025800.1 | 0.2022 | 66.213   | -8.3552  | Down | 0         | 0         |
| Unigene112552 | Potri.009G133400.1 | 0.1529 | 52.8666  | -8.4336  | Down | 1.94E-100 | 4.17E-99  |
| Unigene105537 | Potri.005G064300.1 | 0.0488 | 17.1571  | -8.4577  | Down | 2.00E-304 | 1.80E-302 |
| Unigene116694 | Potri.002G025500.1 | 0.2274 | 90.1717  | -8.6313  | Down | 1.45E-229 | 8.87E-228 |
| Unigene117657 | Potri.001G222300.1 | 0      | 3.0005   | -11.551  | Down | 1.24E-09  | 3.46E-09  |
| Unigene117859 | Potri.019G036900.1 | 0      | 3.0035   | -11.5524 | Down | 5.97E-10  | 1.70E-09  |
| Unigene113426 | Potri.009G064900.1 | 0      | 3.006    | -11.5536 | Down | 8.93E-07  | 2.06E-06  |
| Unigene100844 | Potri.009G046900.1 | 0      | 3.0095   | -11.5553 | Down | 3.85E-06  | 8.47E-06  |
| Unigene115002 | Potri.T029700.1    | 0      | 3.0139   | -11.5574 | Down | 2.07E-07  | 5.01E-07  |
| Unigene109294 | Potri.002G075800.1 | 0      | 3.0186   | -11.5597 | Down | 8.00E-06  | 1.70E-05  |
| Unigene112034 | Potri.009G050700.5 | 0      | 3.0265   | -11.5634 | Down | 1.85E-06  | 4.18E-06  |
| Unigene112075 | Potri.006G127500.2 | 0      | 3.0265   | -11.5634 | Down | 1.85E-06  | 4.18E-06  |
| Unigene102199 | Potri.018G018800.1 | 0      | 3.0298   | -11.565  | Down | 8.93E-07  | 2.07E-06  |
| Unigene105290 | Potri.004G017700.3 | 0      | 3.0304   | -11.5653 | Down | 4.79E-08  | 1.21E-07  |
| Unigene109122 | Potri.011G044800.1 | 0      | 3.0328   | -11.5664 | Down | 8.00E-06  | 1.70E-05  |
| Unigene114889 | Potri.002G067600.1 | 0      | 3.0356   | -11.5678 | Down | 2.07E-07  | 5.01E-07  |
| Unigene110591 | Potri.001G218700.5 | 0      | 3.0362   | -11.5681 | Down | 3.85E-06  | 8.47E-06  |
| Unigene113167 | Potri.013G065300.1 | 0      | 3.0419   | -11.5708 | Down | 8.93E-07  | 2.06E-06  |
| Unigene114808 | Potri.004G117500.2 | 0      | 3.0465   | -11.5729 | Down | 2.07E-07  | 5.01E-07  |
| Unigene109039 | Potri.003G137800.1 | 0      | 3.0472   | -11.5733 | Down | 8.00E-06  | 1.70E-05  |
| Unigene108990 | Potri.002G058600.1 | 0      | 3.0472   | -11.5733 | Down | 8.00E-06  | 1.70E-05  |
| Unigene115469 | Potri.014G023100.1 | 0      | 3.0485   | -11.5739 | Down | 9.96E-08  | 2.47E-07  |
| Unigene110544 | Potri.011G165700.1 | 0      | 3.0498   | -11.5745 | Down | 3.85E-06  | 8.47E-06  |
| Unigene102529 | Potri.015G053400.1 | 0      | 3.052    | -11.5755 | Down | 2.31E-08  | 5.97E-08  |
| Unigene111866 | Potri.002G165500.2 | 0      | 3.052    | -11.5755 | Down | 1.85E-06  | 4.18E-06  |
| Unigene111865 | Potri.002G063400.3 | 0      | 3.052    | -11.5755 | Down | 1.85E-06  | 4.18E-06  |
| Unigene116672 | Potri.002G144700.1 | 0      | 3.0629   | -11.5807 | Down | 1.11E-08  | 2.93E-08  |
| Unigene111752 | Potri.007G050500.1 | 0      | 3.065    | -11.5817 | Down | 1.85E-06  | 4.18E-06  |
| Unigene114748 | Potri.019G071000.9 | 0      | 3.0687   | -11.5834 | Down | 2.07E-07  | 5.01E-07  |
| Unigene114752 | Potri.004G028300.1 | 0      | 3.0687   | -11.5834 | Down | 2.07E-07  | 5.01E-07  |
| Unigene115844 | Potri.002G032900.1 | 0      | 3.0706   | -11.5843 | Down | 4.79E-08  | 1.21E-07  |
| Unigene108689 | Potri.004G191300.2 | 0      | 3.0764   | -11.587  | Down | 8.00E-06  | 1.70E-05  |

|               |                    |   |        |          |      |          |          |
|---------------|--------------------|---|--------|----------|------|----------|----------|
| Unigene110256 | Potri.012G088800.1 | 0 | 3.0772 | -11.5874 | Down | 3.85E-06 | 8.47E-06 |
| Unigene96503  | Potri.017G147500.2 | 0 | 3.0787 | -11.5881 | Down | 8.93E-07 | 2.06E-06 |
| Unigene116632 | Potri.T043400.1    | 0 | 3.0817 | -11.5895 | Down | 1.11E-08 | 2.93E-08 |
| Unigene117703 | Potri.006G005400.3 | 0 | 3.083  | -11.5901 | Down | 5.97E-10 | 1.70E-09 |
| Unigene111594 | Potri.014G067000.2 | 0 | 3.0912 | -11.594  | Down | 1.85E-06 | 4.18E-06 |
| Unigene111611 | Potri.009G152700.1 | 0 | 3.0912 | -11.594  | Down | 1.85E-06 | 4.18E-06 |
| Unigene110246 | Potri.005G007000.1 | 0 | 3.0912 | -11.594  | Down | 3.85E-06 | 8.47E-06 |
| Unigene101319 | Potri.001G277900.1 | 0 | 3.0912 | -11.594  | Down | 1.54E-11 | 4.78E-11 |
| Unigene110125 | Potri.001G262300.1 | 0 | 3.0912 | -11.594  | Down | 3.85E-06 | 8.47E-06 |
| Unigene106612 | Potri.003G078000.5 | 0 | 3.0986 | -11.5974 | Down | 6.65E-11 | 2.00E-10 |
| Unigene98931  | Potri.016G092200.1 | 0 | 3.0989 | -11.5975 | Down | 1.38E-10 | 4.07E-10 |
| Unigene101109 | Potri.014G000400.1 | 0 | 3.1031 | -11.5995 | Down | 4.30E-07 | 1.02E-06 |
| Unigene113726 | Potri.010G068700.1 | 0 | 3.1031 | -11.5995 | Down | 4.30E-07 | 1.02E-06 |
| Unigene94734  | Potri.019G045900.1 | 0 | 3.1037 | -11.5998 | Down | 8.93E-07 | 2.06E-06 |
| Unigene111421 | Potri.012G058400.1 | 0 | 3.1178 | -11.6063 | Down | 1.85E-06 | 4.18E-06 |
| Unigene118149 | Potri.011G004700.1 | 0 | 3.1288 | -11.6114 | Down | 6.65E-11 | 2.00E-10 |
| Unigene112567 | Potri.009G137800.2 | 0 | 3.1292 | -11.6116 | Down | 8.93E-07 | 2.06E-06 |
| Unigene116118 | Potri.001G316900.1 | 0 | 3.1313 | -11.6125 | Down | 2.31E-08 | 5.97E-08 |
| Unigene118387 | Potri.003G196900.2 | 0 | 3.1337 | -11.6137 | Down | 1.54E-11 | 4.78E-11 |
| Unigene108205 | Potri.007G050500.2 | 0 | 3.1364 | -11.6149 | Down | 8.00E-06 | 1.70E-05 |
| Unigene101772 | Potri.004G069400.1 | 0 | 3.1421 | -11.6175 | Down | 8.93E-07 | 2.07E-06 |
| Unigene101884 | Potri.001G339500.2 | 0 | 3.1449 | -11.6188 | Down | 1.85E-06 | 4.19E-06 |
| Unigene116758 | Potri.011G047300.1 | 0 | 3.1565 | -11.6241 | Down | 5.35E-09 | 1.44E-08 |
| Unigene114980 | Potri.013G088600.1 | 0 | 3.1574 | -11.6245 | Down | 9.96E-08 | 2.47E-07 |
| Unigene114981 | Potri.011G047700.1 | 0 | 3.1574 | -11.6245 | Down | 9.96E-08 | 2.47E-07 |
| Unigene111086 | Potri.T021600.1    | 0 | 3.1587 | -11.6251 | Down | 1.85E-06 | 4.18E-06 |
| Unigene111117 | Potri.013G159800.5 | 0 | 3.1587 | -11.6251 | Down | 1.85E-06 | 4.18E-06 |
| Unigene107741 | Potri.006G111200.3 | 0 | 3.1673 | -11.629  | Down | 8.00E-06 | 1.70E-05 |
| Unigene105608 | Potri.005G122100.1 | 0 | 3.1692 | -11.6299 | Down | 1.11E-08 | 2.93E-08 |
| Unigene100953 | Potri.T097300.1    | 0 | 3.1725 | -11.6314 | Down | 1.85E-06 | 4.19E-06 |
| Unigene114215 | Potri.017G044700.5 | 0 | 3.1725 | -11.6314 | Down | 2.07E-07 | 5.01E-07 |
| Unigene105515 | Potri.T155200.1    | 0 | 3.1762 | -11.6331 | Down | 4.79E-08 | 1.21E-07 |
| Unigene113345 | Potri.017G075200.2 | 0 | 3.1767 | -11.6333 | Down | 4.30E-07 | 1.02E-06 |
| Unigene103422 | Potri.018G023700.1 | 0 | 3.179  | -11.6344 | Down | 3.99E-13 | 1.34E-12 |
| Unigene103328 | Potri.007G007500.1 | 0 | 3.1792 | -11.6344 | Down | 1.11E-08 | 2.93E-08 |
| Unigene112175 | Potri.003G044900.1 | 0 | 3.1813 | -11.6354 | Down | 8.93E-07 | 2.06E-06 |
| Unigene114150 | Potri.T022800.1    | 0 | 3.1845 | -11.6369 | Down | 2.07E-07 | 5.01E-07 |
| Unigene115467 | Potri.006G082900.1 | 0 | 3.1871 | -11.638  | Down | 4.79E-08 | 1.21E-07 |
| Unigene113265 | Potri.013G054800.1 | 0 | 3.1893 | -11.639  | Down | 4.30E-07 | 1.02E-06 |

|               |                    |   |        |          |      |          |          |
|---------------|--------------------|---|--------|----------|------|----------|----------|
| Unigene117709 | Potri.004G151200.1 | 0 | 3.1893 | -11.639  | Down | 2.87E-10 | 8.32E-10 |
| Unigene109385 | Potri.003G040400.1 | 0 | 3.1923 | -11.6404 | Down | 3.85E-06 | 8.47E-06 |
| Unigene115917 | Potri.015G011600.1 | 0 | 3.1935 | -11.6409 | Down | 2.31E-08 | 5.97E-08 |
| Unigene103161 | Potri.010G155700.1 | 0 | 3.1978 | -11.6429 | Down | 2.87E-10 | 8.32E-10 |
| Unigene101462 | Potri.015G067500.1 | 0 | 3.1981 | -11.643  | Down | 4.79E-08 | 1.21E-07 |
| Unigene110727 | Potri.003G200200.2 | 0 | 3.2006 | -11.6441 | Down | 1.85E-06 | 4.18E-06 |
| Unigene115855 | Potri.002G102200.1 | 0 | 3.2041 | -11.6457 | Down | 2.31E-08 | 5.97E-08 |
| Unigene118885 | Potri.001G242000.1 | 0 | 3.2054 | -11.6463 | Down | 9.24E-14 | 3.19E-13 |
| Unigene96643  | Potri.016G025800.1 | 0 | 3.2073 | -11.6471 | Down | 3.85E-06 | 8.46E-06 |
| Unigene96581  | Potri.002G150800.1 | 0 | 3.2073 | -11.6471 | Down | 3.85E-06 | 8.46E-06 |
| Unigene118529 | Potri.012G124200.1 | 0 | 3.2077 | -11.6473 | Down | 3.57E-12 | 1.14E-11 |
| Unigene98185  | Potri.003G039100.1 | 0 | 3.2081 | -11.6475 | Down | 8.93E-07 | 2.06E-06 |
| Unigene107371 | Potri.019G101000.1 | 0 | 3.2148 | -11.6505 | Down | 8.00E-06 | 1.70E-05 |
| Unigene107274 | Potri.008G104300.1 | 0 | 3.2148 | -11.6505 | Down | 8.00E-06 | 1.70E-05 |
| Unigene107023 | Potri.009G075300.2 | 0 | 3.2238 | -11.6545 | Down | 2.14E-14 | 7.59E-14 |
| Unigene98674  | Potri.015G007200.1 | 0 | 3.2277 | -11.6563 | Down | 4.30E-07 | 1.02E-06 |
| Unigene102791 | Potri.012G036500.1 | 0 | 3.2333 | -11.6588 | Down | 2.07E-07 | 5.01E-07 |
| Unigene113869 | Potri.001G332300.1 | 0 | 3.2333 | -11.6588 | Down | 2.07E-07 | 5.01E-07 |
| Unigene111794 | Potri.007G132300.1 | 0 | 3.2352 | -11.6596 | Down | 8.93E-07 | 2.06E-06 |
| Unigene96471  | Potri.012G059200.1 | 0 | 3.2371 | -11.6605 | Down | 5.97E-10 | 1.70E-09 |
| Unigene106528 | Potri.004G111100.1 | 0 | 3.2407 | -11.6621 | Down | 2.87E-10 | 8.32E-10 |
| Unigene110392 | Potri.002G210000.1 | 0 | 3.2436 | -11.6634 | Down | 1.85E-06 | 4.18E-06 |
| Unigene105753 | Potri.002G242300.1 | 0 | 3.2454 | -11.6642 | Down | 2.47E-22 | 1.18E-21 |
| Unigene111656 | Potri.003G093000.1 | 0 | 3.249  | -11.6658 | Down | 8.93E-07 | 2.06E-06 |
| Unigene106333 | Potri.011G135000.1 | 0 | 3.2583 | -11.6699 | Down | 2.57E-09 | 7.07E-09 |
| Unigene95638  | Potri.009G060900.1 | 0 | 3.2687 | -11.6745 | Down | 3.85E-06 | 8.46E-06 |
| Unigene105989 | Potri.017G007600.1 | 0 | 3.2709 | -11.6755 | Down | 1.24E-09 | 3.46E-09 |
| Unigene110142 | Potri.004G037100.1 | 0 | 3.273  | -11.6764 | Down | 1.85E-06 | 4.18E-06 |
| Unigene111491 | Potri.010G026500.1 | 0 | 3.2769 | -11.6781 | Down | 8.93E-07 | 2.06E-06 |
| Unigene98134  | Potri.001G472900.1 | 0 | 3.2769 | -11.6781 | Down | 8.93E-07 | 2.06E-06 |
| Unigene113623 | Potri.T052300.1    | 0 | 3.2836 | -11.6811 | Down | 2.07E-07 | 5.01E-07 |
| Unigene108568 | Potri.007G058200.1 | 0 | 3.2844 | -11.6814 | Down | 3.85E-06 | 8.47E-06 |
| Unigene110049 | Potri.006G088100.1 | 0 | 3.2879 | -11.683  | Down | 1.85E-06 | 4.18E-06 |
| Unigene110051 | Potri.002G106600.1 | 0 | 3.2879 | -11.683  | Down | 1.85E-06 | 4.18E-06 |
| Unigene116744 | Potri.001G358700.1 | 0 | 3.2879 | -11.683  | Down | 2.57E-09 | 7.06E-09 |
| Unigene97389  | Potri.001G362200.1 | 0 | 3.2916 | -11.6846 | Down | 2.31E-08 | 5.96E-08 |
| Unigene116000 | Potri.015G044300.1 | 0 | 3.2939 | -11.6856 | Down | 1.11E-08 | 2.93E-08 |
| Unigene106510 | Potri.005G073800.1 | 0 | 3.2956 | -11.6863 | Down | 1.38E-10 | 4.08E-10 |
| Unigene47774  | Potri.010G081300.5 | 0 | 3.2988 | -11.6877 | Down | 9.96E-08 | 2.47E-07 |

|               |                    |   |        |          |      |          |          |
|---------------|--------------------|---|--------|----------|------|----------|----------|
| Unigene96083  | Potri.015G147400.2 | 0 | 3.3002 | -11.6883 | Down | 3.85E-06 | 8.46E-06 |
| Unigene96345  | Potri.014G116000.1 | 0 | 3.3079 | -11.6917 | Down | 2.57E-09 | 7.06E-09 |
| Unigene113498 | Potri.015G073300.1 | 0 | 3.3094 | -11.6924 | Down | 2.07E-07 | 5.01E-07 |
| Unigene118603 | Potri.001G017700.2 | 0 | 3.3124 | -11.6937 | Down | 8.28E-13 | 2.73E-12 |
| Unigene99759  | Potri.005G007700.1 | 0 | 3.3128 | -11.6938 | Down | 4.79E-08 | 1.21E-07 |
| Unigene109796 | Potri.014G116000.1 | 0 | 3.318  | -11.6961 | Down | 1.85E-06 | 4.18E-06 |
| Unigene111234 | Potri.004G146900.2 | 0 | 3.3196 | -11.6968 | Down | 8.93E-07 | 2.07E-06 |
| Unigene106061 | Potri.010G053200.1 | 0 | 3.3201 | -11.697  | Down | 5.97E-10 | 1.70E-09 |
| Unigene115477 | Potri.008G061100.2 | 0 | 3.3257 | -11.6994 | Down | 2.31E-08 | 5.97E-08 |
| Unigene118949 | Potri.001G282100.1 | 0 | 3.3361 | -11.7039 | Down | 1.03E-14 | 3.71E-14 |
| Unigene103433 | Potri.003G211300.1 | 0 | 3.3367 | -11.7042 | Down | 4.79E-08 | 1.21E-07 |
| Unigene98065  | Potri.003G120500.1 | 0 | 3.3388 | -11.7051 | Down | 1.24E-09 | 3.46E-09 |
| Unigene119065 | Potri.002G054900.1 | 0 | 3.3428 | -11.7068 | Down | 1.15E-15 | 4.31E-15 |
| Unigene111024 | Potri.011G133400.1 | 0 | 3.3488 | -11.7094 | Down | 8.93E-07 | 2.07E-06 |
| Unigene97307  | Potri.001G363300.1 | 0 | 3.3488 | -11.7094 | Down | 1.85E-06 | 4.18E-06 |
| Unigene118234 | Potri.002G054900.1 | 0 | 3.3568 | -11.7129 | Down | 7.42E-12 | 2.34E-11 |
| Unigene96499  | Potri.006G127500.2 | 0 | 3.3635 | -11.7157 | Down | 8.93E-07 | 2.06E-06 |
| Unigene104156 | Potri.012G006400.1 | 0 | 3.3658 | -11.7167 | Down | 3.20E-11 | 9.78E-11 |
| Unigene105600 | Potri.014G194000.1 | 0 | 3.3732 | -11.7199 | Down | 2.39E-15 | 8.83E-15 |
| Unigene104966 | Potri.002G168400.1 | 0 | 3.3776 | -11.7218 | Down | 3.99E-13 | 1.34E-12 |
| Unigene103693 | Potri.017G138500.5 | 0 | 3.3792 | -11.7225 | Down | 1.72E-12 | 5.59E-12 |
| Unigene109329 | Potri.011G008800.1 | 0 | 3.3801 | -11.7229 | Down | 1.85E-06 | 4.18E-06 |
| Unigene107651 | Potri.013G010300.2 | 0 | 3.3819 | -11.7236 | Down | 3.85E-06 | 8.47E-06 |
| Unigene102464 | Potri.003G062000.1 | 0 | 3.3819 | -11.7236 | Down | 3.85E-06 | 8.47E-06 |
| Unigene117082 | Potri.013G037500.1 | 0 | 3.3877 | -11.7261 | Down | 5.97E-10 | 1.70E-09 |
| Unigene116466 | Potri.010G091600.1 | 0 | 3.3906 | -11.7273 | Down | 2.57E-09 | 7.06E-09 |
| Unigene111939 | Potri.015G139300.2 | 0 | 3.3912 | -11.7276 | Down | 4.30E-07 | 1.02E-06 |
| Unigene106716 | Potri.005G035800.1 | 0 | 3.3923 | -11.728  | Down | 3.99E-13 | 1.34E-12 |
| Unigene105871 | Potri.003G175800.1 | 0 | 3.3994 | -11.7311 | Down | 1.24E-09 | 3.46E-09 |
| Unigene117512 | Potri.017G008300.1 | 0 | 3.4037 | -11.7329 | Down | 1.38E-10 | 4.07E-10 |
| Unigene102706 | Potri.013G000100.1 | 0 | 3.407  | -11.7343 | Down | 3.99E-13 | 1.34E-12 |
| Unigene98020  | Potri.005G044100.1 | 0 | 3.4086 | -11.735  | Down | 8.93E-07 | 2.06E-06 |
| Unigene101197 | Potri.015G137100.1 | 0 | 3.412  | -11.7364 | Down | 2.57E-09 | 7.07E-09 |
| Unigene95082  | Potri.012G020800.1 | 0 | 3.412  | -11.7364 | Down | 1.85E-06 | 4.18E-06 |
| Unigene102609 | Potri.017G072900.1 | 0 | 3.4134 | -11.737  | Down | 9.96E-08 | 2.47E-07 |
| Unigene95105  | Potri.003G176000.2 | 0 | 3.4157 | -11.738  | Down | 3.85E-06 | 8.46E-06 |
| Unigene112713 | Potri.009G036900.1 | 0 | 3.4304 | -11.7442 | Down | 2.07E-07 | 5.01E-07 |
| Unigene111621 | Potri.014G180800.1 | 0 | 3.4346 | -11.7459 | Down | 4.30E-07 | 1.02E-06 |
| Unigene113504 | Potri.001G095600.1 | 0 | 3.4534 | -11.7538 | Down | 9.96E-08 | 2.47E-07 |

|               |                    |   |        |          |      |          |          |
|---------------|--------------------|---|--------|----------|------|----------|----------|
| Unigene118543 | Potri.014G132500.1 | 0 | 3.4597 | -11.7564 | Down | 3.99E-13 | 1.34E-12 |
| Unigene99739  | Potri.018G106300.1 | 0 | 3.4705 | -11.7609 | Down | 8.93E-07 | 2.06E-06 |
| Unigene118914 | Potri.006G116900.6 | 0 | 3.4709 | -11.7611 | Down | 4.96E-15 | 1.81E-14 |
| Unigene106979 | Potri.004G187900.1 | 0 | 3.4709 | -11.7611 | Down | 4.96E-15 | 1.81E-14 |
| Unigene114096 | Potri.003G136000.1 | 0 | 3.501  | -11.7736 | Down | 4.79E-08 | 1.21E-07 |
| Unigene61631  | Potri.001G367400.6 | 0 | 3.501  | -11.7736 | Down | 4.79E-08 | 1.21E-07 |
| Unigene109789 | Potri.003G118300.8 | 0 | 3.5024 | -11.7741 | Down | 8.93E-07 | 2.07E-06 |
| Unigene105072 | Potri.016G057800.1 | 0 | 3.5053 | -11.7753 | Down | 1.60E-18 | 6.72E-18 |
| Unigene113192 | Potri.017G016600.1 | 0 | 3.5222 | -11.7823 | Down | 9.96E-08 | 2.47E-07 |
| Unigene101133 | Potri.001G041700.1 | 0 | 3.525  | -11.7834 | Down | 4.30E-07 | 1.02E-06 |
| Unigene108103 | Potri.015G094400.2 | 0 | 3.5285 | -11.7848 | Down | 1.85E-06 | 4.18E-06 |
| Unigene109553 | Potri.010G047900.1 | 0 | 3.5348 | -11.7874 | Down | 8.93E-07 | 2.07E-06 |
| Unigene113124 | Potri.015G024200.1 | 0 | 3.5363 | -11.788  | Down | 9.96E-08 | 2.47E-07 |
| Unigene119108 | Potri.012G096600.1 | 0 | 3.5396 | -11.7894 | Down | 6.17E-17 | 2.44E-16 |
| Unigene114580 | Potri.018G063500.2 | 0 | 3.5458 | -11.7919 | Down | 2.31E-08 | 5.97E-08 |
| Unigene118444 | Potri.010G204700.1 | 0 | 3.5458 | -11.7919 | Down | 3.99E-13 | 1.34E-12 |
| Unigene117812 | Potri.006G007900.2 | 0 | 3.5488 | -11.7931 | Down | 1.54E-11 | 4.78E-11 |
| Unigene116389 | Potri.019G116200.1 | 0 | 3.5495 | -11.7934 | Down | 1.24E-09 | 3.46E-09 |
| Unigene101584 | Potri.016G027100.1 | 0 | 3.5538 | -11.7951 | Down | 5.35E-09 | 1.44E-08 |
| Unigene113797 | Potri.019G085800.2 | 0 | 3.5548 | -11.7956 | Down | 4.79E-08 | 1.21E-07 |
| Unigene113808 | Potri.014G173600.1 | 0 | 3.5548 | -11.7956 | Down | 4.79E-08 | 1.21E-07 |
| Unigene110810 | Potri.004G065400.1 | 0 | 3.5562 | -11.7961 | Down | 4.30E-07 | 1.02E-06 |
| Unigene113746 | Potri.008G106400.1 | 0 | 3.5686 | -11.8011 | Down | 4.79E-08 | 1.21E-07 |
| Unigene105752 | Potri.012G049800.1 | 0 | 3.5767 | -11.8044 | Down | 1.54E-11 | 4.78E-11 |
| Unigene117173 | Potri.001G359300.6 | 0 | 3.5797 | -11.8056 | Down | 1.38E-10 | 4.08E-10 |
| Unigene107667 | Potri.008G106000.2 | 0 | 3.5809 | -11.8061 | Down | 1.85E-06 | 4.19E-06 |
| Unigene109192 | Potri.T099700.5    | 0 | 3.5846 | -11.8076 | Down | 8.93E-07 | 2.07E-06 |
| Unigene114979 | Potri.008G225800.1 | 0 | 3.588  | -11.809  | Down | 1.11E-08 | 2.93E-08 |
| Unigene111640 | Potri.014G027800.1 | 0 | 3.591  | -11.8102 | Down | 2.07E-07 | 5.01E-07 |
| Unigene115884 | Potri.018G098500.1 | 0 | 3.5927 | -11.8109 | Down | 2.57E-09 | 7.07E-09 |
| Unigene105144 | Potri.009G064800.1 | 0 | 3.5987 | -11.8133 | Down | 2.31E-08 | 5.97E-08 |
| Unigene100759 | Potri.T136100.1    | 0 | 3.6041 | -11.8154 | Down | 4.30E-07 | 1.02E-06 |
| Unigene118580 | Potri.005G142300.1 | 0 | 3.6052 | -11.8159 | Down | 9.24E-14 | 3.19E-13 |
| Unigene106847 | Potri.003G132500.1 | 0 | 3.6141 | -11.8194 | Down | 4.45E-14 | 1.56E-13 |
| Unigene107242 | Potri.018G088100.1 | 0 | 3.6167 | -11.8205 | Down | 1.85E-06 | 4.19E-06 |
| Unigene107287 | Potri.009G151500.2 | 0 | 3.6167 | -11.8205 | Down | 1.85E-06 | 4.19E-06 |
| Unigene116821 | Potri.015G039400.1 | 0 | 3.6203 | -11.8219 | Down | 2.87E-10 | 8.32E-10 |
| Unigene113438 | Potri.001G095600.1 | 0 | 3.6245 | -11.8236 | Down | 4.79E-08 | 1.21E-07 |
| Unigene114814 | Potri.015G051200.1 | 0 | 3.6268 | -11.8245 | Down | 1.11E-08 | 2.93E-08 |

|               |                     |   |        |          |      |          |          |
|---------------|---------------------|---|--------|----------|------|----------|----------|
| Unigene115365 | Potri.002G076000.1  | 0 | 3.6278 | -11.8249 | Down | 5.35E-09 | 1.44E-08 |
| Unigene106060 | Potri.016G037700.1  | 0 | 3.6319 | -11.8265 | Down | 1.38E-10 | 4.08E-10 |
| Unigene117052 | Potri.003G169400.1  | 0 | 3.6319 | -11.8265 | Down | 1.38E-10 | 4.08E-10 |
| Unigene106596 | Potri.018G090200.1  | 0 | 3.6348 | -11.8277 | Down | 3.57E-12 | 1.14E-11 |
| Unigene106756 | Potri.018G028700.1  | 0 | 3.6451 | -11.8317 | Down | 9.24E-14 | 3.19E-13 |
| Unigene104999 | Potri.012G023300.1  | 0 | 3.6453 | -11.8318 | Down | 4.45E-14 | 1.56E-13 |
| Unigene111255 | Potri.013G157800.1  | 0 | 3.6532 | -11.8349 | Down | 2.07E-07 | 5.01E-07 |
| Unigene104436 | Potri.012G090400.2  | 0 | 3.6532 | -11.8349 | Down | 1.54E-11 | 4.78E-11 |
| Unigene110057 | Potri.005G198600.1  | 0 | 3.6532 | -11.8349 | Down | 4.30E-07 | 1.02E-06 |
| Unigene57511  | Potri.003G167800.1  | 0 | 3.6532 | -11.8349 | Down | 2.31E-08 | 5.96E-08 |
| Unigene110006 | Potri.001G053400.1  | 0 | 3.6532 | -11.8349 | Down | 4.30E-07 | 1.02E-06 |
| Unigene118330 | Potri.004G222000.1  | 0 | 3.6617 | -11.8383 | Down | 3.99E-13 | 1.34E-12 |
| Unigene99500  | Potri.010G135200.1  | 0 | 3.6643 | -11.8393 | Down | 2.87E-10 | 8.32E-10 |
| Unigene99461  | Potri.006G166500.2  | 0 | 3.666  | -11.84   | Down | 5.35E-09 | 1.44E-08 |
| Unigene114628 | Potri.018G121800.1  | 0 | 3.68   | -11.8455 | Down | 1.11E-08 | 2.93E-08 |
| Unigene109888 | Potri.013G037500.1  | 0 | 3.6867 | -11.8481 | Down | 4.30E-07 | 1.02E-06 |
| Unigene108437 | Potri.017G035700.1  | 0 | 3.6885 | -11.8488 | Down | 8.93E-07 | 2.07E-06 |
| Unigene99519  | Potri.004G152300.1  | 0 | 3.6991 | -11.853  | Down | 9.96E-08 | 2.47E-07 |
| Unigene103045 | Potri.002G030500.1  | 0 | 3.7106 | -11.8574 | Down | 1.37E-30 | 8.46E-30 |
| Unigene113045 | Potri.001G339500.2  | 0 | 3.7119 | -11.8579 | Down | 4.79E-08 | 1.21E-07 |
| Unigene117088 | Potri.001G270800.1  | 0 | 3.7273 | -11.8639 | Down | 6.65E-11 | 2.00E-10 |
| Unigene111938 | Potri.007G006700.1  | 0 | 3.7303 | -11.8651 | Down | 9.96E-08 | 2.47E-07 |
| Unigene118518 | Potri.016G033100.2  | 0 | 3.7506 | -11.8729 | Down | 4.45E-14 | 1.56E-13 |
| Unigene113648 | Potri.015G059400.2  | 0 | 3.7527 | -11.8737 | Down | 2.31E-08 | 5.97E-08 |
| Unigene107750 | Potri.003G157900.1  | 0 | 3.7612 | -11.877  | Down | 8.93E-07 | 2.07E-06 |
| Unigene114258 | Potri.011G128700.1  | 0 | 3.7627 | -11.8776 | Down | 1.11E-08 | 2.93E-08 |
| Unigene98644  | Potri.T087700.2     | 0 | 3.7632 | -11.8777 | Down | 1.24E-09 | 3.46E-09 |
| Unigene103773 | Potri.011G053600.1  | 0 | 3.7642 | -11.8781 | Down | 1.72E-12 | 5.59E-12 |
| Unigene113552 | Potri.008G026600.1  | 0 | 3.7674 | -11.8794 | Down | 2.31E-08 | 5.97E-08 |
| Unigene100835 | Potri.018G067500.1  | 0 | 3.7725 | -11.8813 | Down | 4.79E-08 | 1.21E-07 |
| Unigene118488 | Potri.003G146500.2  | 0 | 3.7758 | -11.8826 | Down | 4.45E-14 | 1.56E-13 |
| Unigene114221 | Potri.014G104900.1  | 0 | 3.7768 | -11.8829 | Down | 1.11E-08 | 2.93E-08 |
| Unigene111624 | Potri.002G062600.12 | 0 | 3.7781 | -11.8834 | Down | 9.96E-08 | 2.47E-07 |
| Unigene107657 | Potri.004G019700.1  | 0 | 3.7798 | -11.8841 | Down | 8.93E-07 | 2.07E-06 |
| Unigene117923 | Potri.010G121700.1  | 0 | 3.7833 | -11.8854 | Down | 1.72E-12 | 5.59E-12 |
| Unigene107441 | Potri.010G094200.3  | 0 | 3.7986 | -11.8913 | Down | 8.93E-07 | 2.07E-06 |
| Unigene107325 | Potri.014G025000.1  | 0 | 3.8176 | -11.8985 | Down | 8.93E-07 | 2.07E-06 |
| Unigene96696  | Potri.007G026700.1  | 0 | 3.8199 | -11.8993 | Down | 1.11E-08 | 2.93E-08 |
| Unigene101084 | Potri.002G111200.1  | 0 | 3.822  | -11.9001 | Down | 7.42E-12 | 2.34E-11 |

|               |                    |   |        |          |      |          |          |
|---------------|--------------------|---|--------|----------|------|----------|----------|
| Unigene113287 | Potri.T141500.1    | 0 | 3.8272 | -11.9021 | Down | 2.31E-08 | 5.97E-08 |
| Unigene116322 | Potri.012G073500.3 | 0 | 3.8272 | -11.9021 | Down | 2.87E-10 | 8.32E-10 |
| Unigene103355 | Potri.004G073000.1 | 0 | 3.8272 | -11.9021 | Down | 1.54E-11 | 4.78E-11 |
| Unigene101464 | Potri.001G187100.1 | 0 | 3.8272 | -11.9021 | Down | 9.96E-08 | 2.47E-07 |
| Unigene106900 | Potri.019G120000.1 | 0 | 3.8316 | -11.9037 | Down | 9.24E-14 | 3.19E-13 |
| Unigene118526 | Potri.001G455100.1 | 0 | 3.8314 | -11.9037 | Down | 2.14E-14 | 7.59E-14 |
| Unigene103735 | Potri.019G119300.2 | 0 | 3.8335 | -11.9044 | Down | 5.97E-10 | 1.70E-09 |
| Unigene102618 | Potri.017G045500.2 | 0 | 3.8412 | -11.9073 | Down | 3.99E-13 | 1.34E-12 |
| Unigene117511 | Potri.014G156600.1 | 0 | 3.8428 | -11.9079 | Down | 7.42E-12 | 2.34E-11 |
| Unigene111184 | Potri.013G115500.1 | 0 | 3.8438 | -11.9083 | Down | 9.96E-08 | 2.47E-07 |
| Unigene109955 | Potri.011G152400.2 | 0 | 3.8534 | -11.9119 | Down | 2.07E-07 | 5.01E-07 |
| Unigene101646 | Potri.009G031800.1 | 0 | 3.8612 | -11.9148 | Down | 2.57E-09 | 7.07E-09 |
| Unigene113847 | Potri.T080500.1    | 0 | 3.864  | -11.9159 | Down | 1.11E-08 | 2.93E-08 |
| Unigene109871 | Potri.001G144200.1 | 0 | 3.8711 | -11.9185 | Down | 2.07E-07 | 5.01E-07 |
| Unigene95168  | Potri.002G029100.2 | 0 | 3.8775 | -11.9209 | Down | 9.96E-08 | 2.47E-07 |
| Unigene109783 | Potri.015G068800.1 | 0 | 3.8889 | -11.9251 | Down | 2.07E-07 | 5.01E-07 |
| Unigene117232 | Potri.003G143800.1 | 0 | 3.8926 | -11.9265 | Down | 1.54E-11 | 4.78E-11 |
| Unigene105531 | Potri.017G038100.2 | 0 | 3.8929 | -11.9266 | Down | 1.38E-10 | 4.08E-10 |
| Unigene111833 | Potri.004G176500.1 | 0 | 3.8998 | -11.9292 | Down | 4.79E-08 | 1.21E-07 |
| Unigene108308 | Potri.007G145000.1 | 0 | 3.9015 | -11.9298 | Down | 4.30E-07 | 1.02E-06 |
| Unigene107209 | Potri.008G040400.1 | 0 | 3.9105 | -11.9331 | Down | 7.12E-25 | 3.71E-24 |
| Unigene111805 | Potri.001G183000.3 | 0 | 3.9164 | -11.9353 | Down | 4.79E-08 | 1.21E-07 |
| Unigene108057 | Potri.009G119200.2 | 0 | 3.9205 | -11.9368 | Down | 4.30E-07 | 1.02E-06 |
| Unigene115724 | Potri.017G112800.1 | 0 | 3.9238 | -11.938  | Down | 5.97E-10 | 1.70E-09 |
| Unigene105621 | Potri.T075600.1    | 0 | 3.9243 | -11.9382 | Down | 1.28E-16 | 5.01E-16 |
| Unigene117867 | Potri.003G019500.3 | 0 | 3.9255 | -11.9387 | Down | 8.28E-13 | 2.73E-12 |
| Unigene101269 | Potri.013G133800.1 | 0 | 3.9284 | -11.9397 | Down | 4.12E-20 | 1.84E-19 |
| Unigene117382 | Potri.007G125600.1 | 0 | 3.9287 | -11.9398 | Down | 7.42E-12 | 2.34E-11 |
| Unigene110579 | Potri.005G233600.1 | 0 | 3.9292 | -11.94   | Down | 9.96E-08 | 2.47E-07 |
| Unigene116648 | Potri.003G166000.1 | 0 | 3.9325 | -11.9412 | Down | 6.65E-11 | 2.00E-10 |
| Unigene98406  | Potri.006G263700.1 | 0 | 3.9434 | -11.9452 | Down | 2.07E-07 | 5.01E-07 |
| Unigene102508 | Potri.006G157400.1 | 0 | 3.9446 | -11.9457 | Down | 6.65E-11 | 2.00E-10 |
| Unigene99662  | Potri.002G054900.1 | 0 | 3.9498 | -11.9476 | Down | 4.79E-08 | 1.21E-07 |
| Unigene104650 | Potri.T003900.1    | 0 | 3.9544 | -11.9492 | Down | 1.72E-12 | 5.59E-12 |
| Unigene99604  | Potri.001G162700.1 | 0 | 3.9673 | -11.9539 | Down | 1.38E-10 | 4.07E-10 |
| Unigene102068 | Potri.T009300.1    | 0 | 3.9787 | -11.9581 | Down | 8.57E-20 | 3.78E-19 |
| Unigene109123 | Potri.010G160200.7 | 0 | 3.9806 | -11.9588 | Down | 2.07E-07 | 5.01E-07 |
| Unigene100327 | Potri.003G102600.1 | 0 | 3.9806 | -11.9588 | Down | 2.07E-07 | 5.01E-07 |
| Unigene116811 | Potri.006G116900.4 | 0 | 3.9823 | -11.9594 | Down | 3.20E-11 | 9.78E-11 |



|               |                    |   |        |          |      |          |          |
|---------------|--------------------|---|--------|----------|------|----------|----------|
| Unigene118026 | Potri.007G111600.1 | 0 | 4.0085 | -11.9688 | Down | 1.92E-13 | 6.53E-13 |
| Unigene99148  | Potri.T107100.1    | 0 | 4.0134 | -11.9706 | Down | 7.94E-26 | 4.26E-25 |
| Unigene112218 | Potri.013G067800.1 | 0 | 4.0185 | -11.9724 | Down | 2.31E-08 | 5.97E-08 |
| Unigene101360 | Potri.005G241800.1 | 0 | 4.0307 | -11.9768 | Down | 3.20E-11 | 9.78E-11 |
| Unigene111075 | Potri.019G050200.2 | 0 | 4.0361 | -11.9787 | Down | 4.79E-08 | 1.21E-07 |
| Unigene112931 | Potri.001G009600.1 | 0 | 4.0509 | -11.984  | Down | 1.11E-08 | 2.93E-08 |
| Unigene115361 | Potri.003G132900.1 | 0 | 4.0605 | -11.9874 | Down | 5.97E-10 | 1.70E-09 |
| Unigene103547 | Potri.011G047700.1 | 0 | 4.0637 | -11.9886 | Down | 2.57E-09 | 7.07E-09 |
| Unigene106024 | Potri.012G049800.1 | 0 | 4.0678 | -11.99   | Down | 3.20E-11 | 9.78E-11 |
| Unigene110794 | Potri.019G101400.1 | 0 | 4.0896 | -11.9977 | Down | 4.79E-08 | 1.21E-07 |
| Unigene110817 | Potri.013G067000.1 | 0 | 4.0896 | -11.9977 | Down | 4.79E-08 | 1.21E-07 |
| Unigene108220 | Potri.005G006200.1 | 0 | 4.0966 | -12.0002 | Down | 2.07E-07 | 5.01E-07 |
| Unigene110709 | Potri.002G103800.1 | 0 | 4.1078 | -12.0042 | Down | 4.79E-08 | 1.21E-07 |
| Unigene95363  | Potri.006G254900.2 | 0 | 4.112  | -12.0056 | Down | 9.96E-08 | 2.47E-07 |
| Unigene110547 | Potri.T123900.1    | 0 | 4.1262 | -12.0106 | Down | 4.79E-08 | 1.21E-07 |
| Unigene113341 | Potri.001G093600.1 | 0 | 4.1297 | -12.0118 | Down | 5.35E-09 | 1.44E-08 |
| Unigene117210 | Potri.011G102300.1 | 0 | 4.1333 | -12.0131 | Down | 3.57E-12 | 1.14E-11 |
| Unigene104430 | Potri.010G026800.4 | 0 | 4.1354 | -12.0138 | Down | 2.39E-15 | 8.83E-15 |
| Unigene118630 | Potri.008G174400.5 | 0 | 4.1571 | -12.0214 | Down | 5.53E-16 | 2.10E-15 |
| Unigene105974 | Potri.008G036700.2 | 0 | 4.1571 | -12.0214 | Down | 3.99E-13 | 1.34E-12 |
| Unigene104609 | Potri.010G166800.1 | 0 | 4.1643 | -12.0239 | Down | 8.57E-20 | 3.78E-19 |
| Unigene118058 | Potri.009G058100.1 | 0 | 4.1777 | -12.0285 | Down | 4.45E-14 | 1.56E-13 |
| Unigene101333 | Potri.004G151700.2 | 0 | 4.2005 | -12.0363 | Down | 2.87E-10 | 8.32E-10 |
| Unigene101847 | Potri.001G081700.1 | 0 | 4.213  | -12.0406 | Down | 5.35E-09 | 1.44E-08 |
| Unigene106006 | Potri.T155700.3    | 0 | 4.2175 | -12.0422 | Down | 1.43E-17 | 5.81E-17 |
| Unigene107052 | Potri.009G080800.3 | 0 | 4.2181 | -12.0424 | Down | 2.85E-30 | 1.74E-29 |
| Unigene117736 | Potri.012G066000.1 | 0 | 4.23   | -12.0464 | Down | 1.92E-13 | 6.53E-13 |
| Unigene111026 | Potri.011G155100.1 | 0 | 4.23   | -12.0464 | Down | 2.31E-08 | 5.97E-08 |
| Unigene108691 | Potri.006G261200.1 | 0 | 4.23   | -12.0464 | Down | 9.96E-08 | 2.47E-07 |
| Unigene118640 | Potri.T155700.3    | 0 | 4.2346 | -12.048  | Down | 2.66E-16 | 1.03E-15 |
| Unigene114729 | Potri.012G052200.1 | 0 | 4.2377 | -12.0491 | Down | 5.97E-10 | 1.70E-09 |
| Unigene103638 | Potri.T106100.1    | 0 | 4.2495 | -12.0531 | Down | 2.39E-15 | 8.83E-15 |
| Unigene116224 | Potri.016G041000.2 | 0 | 4.2504 | -12.0534 | Down | 3.20E-11 | 9.78E-11 |
| Unigene103490 | Potri.007G111900.2 | 0 | 4.2504 | -12.0534 | Down | 9.96E-08 | 2.47E-07 |
| Unigene94820  | Potri.007G102100.1 | 0 | 4.2593 | -12.0564 | Down | 4.79E-08 | 1.21E-07 |
| Unigene95284  | Potri.001G088900.1 | 0 | 4.2593 | -12.0564 | Down | 4.79E-08 | 1.21E-07 |
| Unigene114085 | Potri.014G010700.1 | 0 | 4.2621 | -12.0573 | Down | 1.24E-09 | 3.46E-09 |
| Unigene113374 | Potri.011G126700.2 | 0 | 4.2717 | -12.0606 | Down | 2.57E-09 | 7.07E-09 |
| Unigene118063 | Potri.019G106900.1 | 0 | 4.2771 | -12.0624 | Down | 2.14E-14 | 7.59E-14 |

|               |                    |   |        |          |      |          |          |
|---------------|--------------------|---|--------|----------|------|----------|----------|
| Unigene114038 | Potri.004G102500.3 | 0 | 4.2783 | -12.0628 | Down | 1.24E-09 | 3.46E-09 |
| Unigene112591 | Potri.003G147600.2 | 0 | 4.282  | -12.0641 | Down | 5.35E-09 | 1.44E-08 |
| Unigene100956 | Potri.011G125100.1 | 0 | 4.2828 | -12.0643 | Down | 1.15E-15 | 4.31E-15 |
| Unigene112516 | Potri.012G058300.1 | 0 | 4.2997 | -12.07   | Down | 5.35E-09 | 1.44E-08 |
| Unigene115789 | Potri.002G032100.1 | 0 | 4.3008 | -12.0704 | Down | 6.65E-11 | 2.00E-10 |
| Unigene116658 | Potri.017G115900.1 | 0 | 4.3012 | -12.0705 | Down | 7.42E-12 | 2.34E-11 |
| Unigene101066 | Potri.012G077100.1 | 0 | 4.3056 | -12.072  | Down | 3.99E-13 | 1.34E-12 |
| Unigene99880  | Potri.002G249700.2 | 0 | 4.3105 | -12.0736 | Down | 1.38E-10 | 4.07E-10 |
| Unigene116042 | Potri.011G089500.2 | 0 | 4.3337 | -12.0814 | Down | 3.20E-11 | 9.78E-11 |
| Unigene113095 | Potri.015G035700.1 | 0 | 4.34   | -12.0835 | Down | 2.57E-09 | 7.07E-09 |
| Unigene110277 | Potri.006G081500.1 | 0 | 4.3443 | -12.0849 | Down | 2.31E-08 | 5.97E-08 |
| Unigene110320 | Potri.004G230300.1 | 0 | 4.3443 | -12.0849 | Down | 2.31E-08 | 5.97E-08 |
| Unigene105465 | Potri.019G044800.1 | 0 | 4.3484 | -12.0863 | Down | 3.70E-19 | 1.60E-18 |
| Unigene112929 | Potri.016G009200.1 | 0 | 4.375  | -12.0951 | Down | 2.57E-09 | 7.07E-09 |
| Unigene98207  | Potri.018G113000.1 | 0 | 4.3972 | -12.1024 | Down | 3.57E-12 | 1.14E-11 |
| Unigene108878 | Potri.009G144000.1 | 0 | 4.4012 | -12.1037 | Down | 4.79E-08 | 1.21E-07 |
| Unigene108913 | Potri.001G327700.2 | 0 | 4.4012 | -12.1037 | Down | 4.79E-08 | 1.21E-07 |
| Unigene115147 | Potri.006G014800.1 | 0 | 4.4019 | -12.1039 | Down | 1.38E-10 | 4.08E-10 |
| Unigene116446 | Potri.009G081600.7 | 0 | 4.409  | -12.1062 | Down | 7.42E-12 | 2.34E-11 |
| Unigene112593 | Potri.012G133600.3 | 0 | 4.4467 | -12.1185 | Down | 2.57E-09 | 7.07E-09 |
| Unigene115443 | Potri.011G158300.1 | 0 | 4.4496 | -12.1195 | Down | 6.65E-11 | 2.00E-10 |
| Unigene106680 | Potri.008G026900.1 | 0 | 4.4545 | -12.121  | Down | 1.15E-15 | 4.31E-15 |
| Unigene111539 | Potri.006G278000.1 | 0 | 4.465  | -12.1244 | Down | 5.35E-09 | 1.44E-08 |
| Unigene101228 | Potri.004G197700.1 | 0 | 4.465  | -12.1244 | Down | 4.45E-14 | 1.56E-13 |
| Unigene116291 | Potri.005G251500.1 | 0 | 4.4792 | -12.129  | Down | 7.42E-12 | 2.34E-11 |
| Unigene114875 | Potri.007G135100.1 | 0 | 4.4811 | -12.1296 | Down | 1.38E-10 | 4.08E-10 |
| Unigene113159 | Potri.008G152300.2 | 0 | 4.4828 | -12.1302 | Down | 1.24E-09 | 3.46E-09 |
| Unigene98156  | Potri.005G208500.1 | 0 | 4.4835 | -12.1304 | Down | 2.57E-09 | 7.06E-09 |
| Unigene112233 | Potri.019G053200.4 | 0 | 4.5021 | -12.1364 | Down | 2.57E-09 | 7.07E-09 |
| Unigene97472  | Potri.006G030200.1 | 0 | 4.5136 | -12.1401 | Down | 1.38E-10 | 4.07E-10 |
| Unigene102709 | Potri.010G109200.1 | 0 | 4.5169 | -12.1411 | Down | 5.97E-10 | 1.70E-09 |
| Unigene113054 | Potri.014G021400.1 | 0 | 4.5188 | -12.1417 | Down | 1.24E-09 | 3.46E-09 |
| Unigene117900 | Potri.005G120500.1 | 0 | 4.5221 | -12.1428 | Down | 1.03E-14 | 3.71E-14 |
| Unigene106199 | Potri.002G201400.3 | 0 | 4.5559 | -12.1535 | Down | 3.99E-13 | 1.34E-12 |
| Unigene101063 | Potri.011G147600.1 | 0 | 4.5926 | -12.1651 | Down | 3.57E-12 | 1.14E-11 |
| Unigene109836 | Potri.004G068500.1 | 0 | 4.6084 | -12.1701 | Down | 1.11E-08 | 2.93E-08 |
| Unigene114915 | Potri.010G040400.1 | 0 | 4.6091 | -12.1703 | Down | 6.65E-11 | 2.00E-10 |
| Unigene118546 | Potri.017G085000.1 | 0 | 4.6129 | -12.1715 | Down | 2.97E-17 | 1.19E-16 |
| Unigene116780 | Potri.004G223900.1 | 0 | 4.6134 | -12.1716 | Down | 8.28E-13 | 2.73E-12 |

|               |                    |   |        |          |      |          |          |
|---------------|--------------------|---|--------|----------|------|----------|----------|
| Unigene114398 | Potri.012G051200.1 | 0 | 4.631  | -12.1771 | Down | 1.38E-10 | 4.08E-10 |
| Unigene105361 | Potri.005G052700.1 | 0 | 4.6653 | -12.1878 | Down | 1.03E-14 | 3.71E-14 |
| Unigene106443 | Potri.001G295400.1 | 0 | 4.668  | -12.1886 | Down | 2.39E-15 | 8.83E-15 |
| Unigene111355 | Potri.008G203900.1 | 0 | 4.6767 | -12.1913 | Down | 2.57E-09 | 7.07E-09 |
| Unigene114168 | Potri.017G059100.1 | 0 | 4.7009 | -12.1987 | Down | 1.38E-10 | 4.08E-10 |
| Unigene97773  | Potri.005G019400.1 | 0 | 4.7046 | -12.1999 | Down | 2.31E-08 | 5.96E-08 |
| Unigene113541 | Potri.012G122200.1 | 0 | 4.7092 | -12.2013 | Down | 2.87E-10 | 8.32E-10 |
| Unigene115377 | Potri.014G005700.1 | 0 | 4.7441 | -12.2119 | Down | 1.54E-11 | 4.78E-11 |
| Unigene115310 | Potri.005G084400.6 | 0 | 4.7606 | -12.2169 | Down | 1.54E-11 | 4.78E-11 |
| Unigene111787 | Potri.006G254900.4 | 0 | 4.7677 | -12.2191 | Down | 1.24E-09 | 3.46E-09 |
| Unigene111777 | Potri.003G216500.1 | 0 | 4.7677 | -12.2191 | Down | 1.24E-09 | 3.46E-09 |
| Unigene112526 | Potri.001G058600.1 | 0 | 4.7761 | -12.2216 | Down | 5.97E-10 | 1.70E-09 |
| Unigene117823 | Potri.005G064300.1 | 0 | 4.7889 | -12.2255 | Down | 2.39E-15 | 8.83E-15 |
| Unigene118152 | Potri.017G080700.1 | 0 | 4.7909 | -12.2261 | Down | 2.66E-16 | 1.03E-15 |
| Unigene114772 | Potri.016G011700.1 | 0 | 4.8048 | -12.2303 | Down | 3.20E-11 | 9.78E-11 |
| Unigene109764 | Potri.005G041000.6 | 0 | 4.8148 | -12.2333 | Down | 5.35E-09 | 1.44E-08 |
| Unigene117178 | Potri.013G127200.1 | 0 | 4.836  | -12.2396 | Down | 4.45E-14 | 1.56E-13 |
| Unigene115783 | Potri.001G122800.1 | 0 | 4.8546 | -12.2451 | Down | 3.57E-12 | 1.14E-11 |
| Unigene109467 | Potri.017G070700.1 | 0 | 4.8596 | -12.2466 | Down | 5.35E-09 | 1.44E-08 |
| Unigene111258 | Potri.010G063500.1 | 0 | 4.8709 | -12.25   | Down | 1.24E-09 | 3.46E-09 |
| Unigene114086 | Potri.008G106400.1 | 0 | 4.8709 | -12.25   | Down | 6.65E-11 | 2.00E-10 |
| Unigene96722  | Potri.004G196100.1 | 0 | 4.8709 | -12.25   | Down | 1.24E-09 | 3.46E-09 |
| Unigene117724 | Potri.001G362200.1 | 0 | 4.8774 | -12.2519 | Down | 2.39E-15 | 8.83E-15 |
| Unigene109418 | Potri.008G025000.3 | 0 | 4.8823 | -12.2533 | Down | 5.35E-09 | 1.44E-08 |
| Unigene104992 | Potri.017G150900.1 | 0 | 4.8946 | -12.257  | Down | 1.58E-38 | 1.20E-37 |
| Unigene98739  | Potri.005G251800.1 | 0 | 4.9006 | -12.2587 | Down | 2.87E-10 | 8.32E-10 |
| Unigene113926 | Potri.009G136300.2 | 0 | 4.9081 | -12.2609 | Down | 6.65E-11 | 2.00E-10 |
| Unigene111921 | Potri.012G090100.1 | 0 | 4.9172 | -12.2636 | Down | 5.97E-10 | 1.70E-09 |
| Unigene113897 | Potri.017G084200.1 | 0 | 4.9269 | -12.2665 | Down | 6.65E-11 | 2.00E-10 |
| Unigene56549  | Potri.019G006900.1 | 0 | 4.9284 | -12.2669 | Down | 5.35E-09 | 1.44E-08 |
| Unigene106755 | Potri.001G162700.1 | 0 | 4.9368 | -12.2694 | Down | 1.28E-16 | 5.01E-16 |
| Unigene116818 | Potri.001G193400.1 | 0 | 4.9477 | -12.2725 | Down | 9.24E-14 | 3.19E-13 |
| Unigene108966 | Potri.016G116800.1 | 0 | 4.9517 | -12.2737 | Down | 5.35E-09 | 1.44E-08 |
| Unigene98587  | Potri.013G010400.1 | 0 | 4.9611 | -12.2764 | Down | 2.87E-10 | 8.32E-10 |
| Unigene113750 | Potri.005G112200.1 | 0 | 4.965  | -12.2776 | Down | 6.65E-11 | 2.00E-10 |
| Unigene104097 | Potri.003G200200.2 | 0 | 4.9771 | -12.2811 | Down | 2.57E-09 | 7.07E-09 |
| Unigene110725 | Potri.001G119000.1 | 0 | 4.9787 | -12.2816 | Down | 1.24E-09 | 3.46E-09 |
| Unigene104947 | Potri.004G007400.1 | 0 | 4.985  | -12.2834 | Down | 2.66E-16 | 1.03E-15 |
| Unigene114206 | Potri.014G125600.2 | 0 | 4.9854 | -12.2835 | Down | 3.20E-11 | 9.78E-11 |

|               |                    |   |        |          |      |          |          |
|---------------|--------------------|---|--------|----------|------|----------|----------|
| Unigene118597 | Potri.018G141100.4 | 0 | 4.9903 | -12.2849 | Down | 7.68E-19 | 3.27E-18 |
| Unigene107483 | Potri.010G203900.1 | 0 | 4.9982 | -12.2872 | Down | 1.11E-08 | 2.93E-08 |
| Unigene115052 | Potri.001G467300.1 | 0 | 5.0053 | -12.2892 | Down | 7.42E-12 | 2.34E-11 |
| Unigene107321 | Potri.018G070000.2 | 0 | 5.0232 | -12.2944 | Down | 1.11E-08 | 2.93E-08 |
| Unigene102542 | Potri.003G223400.1 | 0 | 5.0232 | -12.2944 | Down | 6.65E-11 | 2.00E-10 |
| Unigene36747  | Potri.005G181700.3 | 0 | 5.0442 | -12.3004 | Down | 2.87E-10 | 8.32E-10 |
| Unigene109523 | Potri.001G029400.1 | 0 | 5.0465 | -12.3011 | Down | 2.57E-09 | 7.07E-09 |
| Unigene114899 | Potri.013G041300.1 | 0 | 5.0593 | -12.3047 | Down | 7.42E-12 | 2.34E-11 |
| Unigene111176 | Potri.009G081100.4 | 0 | 5.0668 | -12.3069 | Down | 5.97E-10 | 1.70E-09 |
| Unigene109321 | Potri.003G151100.1 | 0 | 5.0701 | -12.3078 | Down | 2.57E-09 | 7.07E-09 |
| Unigene105847 | Potri.009G085400.8 | 0 | 5.0707 | -12.308  | Down | 1.92E-13 | 6.53E-13 |
| Unigene111929 | Potri.005G046000.1 | 0 | 5.0867 | -12.3125 | Down | 2.87E-10 | 8.32E-10 |
| Unigene109202 | Potri.004G053500.1 | 0 | 5.0939 | -12.3146 | Down | 2.57E-09 | 7.07E-09 |
| Unigene105267 | Potri.001G162700.1 | 0 | 5.1071 | -12.3183 | Down | 8.28E-13 | 2.73E-12 |
| Unigene112426 | Potri.013G157800.1 | 0 | 5.1265 | -12.3238 | Down | 1.38E-10 | 4.08E-10 |
| Unigene95271  | Potri.005G139000.1 | 0 | 5.1432 | -12.3285 | Down | 1.48E-24 | 7.64E-24 |
| Unigene112362 | Potri.019G094100.1 | 0 | 5.1477 | -12.3297 | Down | 1.38E-10 | 4.08E-10 |
| Unigene118650 | Potri.010G183900.1 | 0 | 5.163  | -12.334  | Down | 8.57E-20 | 3.78E-19 |
| Unigene104093 | Potri.018G063900.2 | 0 | 5.1874 | -12.3408 | Down | 1.48E-24 | 7.64E-24 |
| Unigene112750 | Potri.012G080200.1 | 0 | 5.2273 | -12.3519 | Down | 6.65E-11 | 2.00E-10 |
| Unigene96524  | Potri.002G031300.1 | 0 | 5.2579 | -12.3603 | Down | 1.24E-09 | 3.46E-09 |
| Unigene104664 | Potri.005G233900.1 | 0 | 5.2957 | -12.3706 | Down | 1.54E-11 | 4.78E-11 |
| Unigene111663 | Potri.015G102200.1 | 0 | 5.301  | -12.372  | Down | 1.38E-10 | 4.08E-10 |
| Unigene107140 | Potri.001G020100.1 | 0 | 5.3152 | -12.3759 | Down | 1.23E-29 | 7.39E-29 |
| Unigene115363 | Potri.016G136300.1 | 0 | 5.3207 | -12.3774 | Down | 8.28E-13 | 2.73E-12 |
| Unigene112825 | Potri.006G256600.1 | 0 | 5.3689 | -12.3904 | Down | 3.20E-11 | 9.78E-11 |
| Unigene117970 | Potri.T112700.1    | 0 | 5.3783 | -12.3929 | Down | 1.43E-17 | 5.81E-17 |
| Unigene119007 | Potri.008G023400.3 | 0 | 5.3826 | -12.3941 | Down | 6.38E-24 | 3.23E-23 |
| Unigene103844 | Potri.005G039800.1 | 0 | 5.3952 | -12.3975 | Down | 5.97E-10 | 1.70E-09 |
| Unigene117829 | Potri.019G086200.1 | 0 | 5.3996 | -12.3986 | Down | 2.97E-17 | 1.19E-16 |
| Unigene110272 | Potri.018G032800.1 | 0 | 5.4304 | -12.4068 | Down | 2.87E-10 | 8.32E-10 |
| Unigene109413 | Potri.010G229000.2 | 0 | 5.4457 | -12.4109 | Down | 5.97E-10 | 1.70E-09 |
| Unigene103948 | Potri.007G146900.1 | 0 | 5.4607 | -12.4149 | Down | 3.99E-13 | 1.34E-12 |
| Unigene95346  | Potri.007G127700.1 | 0 | 5.4612 | -12.415  | Down | 7.62E-39 | 5.81E-38 |
| Unigene100663 | Potri.017G098000.1 | 0 | 5.469  | -12.4171 | Down | 2.39E-15 | 8.83E-15 |
| Unigene95362  | Potri.013G032600.1 | 0 | 5.5076 | -12.4272 | Down | 6.88E-18 | 2.83E-17 |
| Unigene117029 | Potri.005G102600.1 | 0 | 5.5225 | -12.4311 | Down | 1.15E-15 | 4.31E-15 |
| Unigene118745 | Potri.T113400.1    | 0 | 5.5859 | -12.4476 | Down | 5.13E-22 | 2.44E-21 |
| Unigene101389 | Potri.002G163400.2 | 0 | 5.6016 | -12.4516 | Down | 2.39E-15 | 8.83E-15 |

|               |                    |   |        |          |      |          |          |
|---------------|--------------------|---|--------|----------|------|----------|----------|
| Unigene116912 | Potri.007G125500.1 | 0 | 5.6045 | -12.4524 | Down | 1.15E-15 | 4.31E-15 |
| Unigene105971 | Potri.001G462700.1 | 0 | 5.618  | -12.4558 | Down | 9.88E-28 | 5.62E-27 |
| Unigene117045 | Potri.019G071200.1 | 0 | 5.6236 | -12.4573 | Down | 5.53E-16 | 2.10E-15 |
| Unigene98518  | Potri.007G108300.1 | 0 | 5.6542 | -12.4651 | Down | 1.60E-18 | 6.72E-18 |
| Unigene94728  | Potri.005G046200.1 | 0 | 5.6618 | -12.467  | Down | 9.24E-14 | 3.19E-13 |
| Unigene99750  | Potri.017G047200.1 | 0 | 5.6866 | -12.4734 | Down | 2.87E-10 | 8.32E-10 |
| Unigene110825 | Potri.010G139500.1 | 0 | 5.6899 | -12.4742 | Down | 6.65E-11 | 2.00E-10 |
| Unigene110576 | Potri.005G165300.1 | 0 | 5.7152 | -12.4806 | Down | 6.65E-11 | 2.00E-10 |
| Unigene108755 | Potri.015G087800.1 | 0 | 5.7682 | -12.4939 | Down | 2.87E-10 | 8.32E-10 |
| Unigene108738 | Potri.011G055000.1 | 0 | 5.7682 | -12.4939 | Down | 2.87E-10 | 8.32E-10 |
| Unigene116229 | Potri.001G276900.1 | 0 | 5.7959 | -12.5008 | Down | 4.96E-15 | 1.81E-14 |
| Unigene107433 | Potri.007G139300.2 | 0 | 5.7979 | -12.5013 | Down | 5.97E-10 | 1.70E-09 |
| Unigene108482 | Potri.012G091500.2 | 0 | 5.8239 | -12.5078 | Down | 2.87E-10 | 8.32E-10 |
| Unigene110929 | Potri.005G035800.1 | 0 | 5.8419 | -12.5122 | Down | 3.20E-11 | 9.78E-11 |
| Unigene109802 | Potri.002G169900.3 | 0 | 5.8987 | -12.5262 | Down | 6.65E-11 | 2.00E-10 |
| Unigene56519  | Potri.009G043100.4 | 0 | 5.9605 | -12.5412 | Down | 1.38E-10 | 4.07E-10 |
| Unigene105150 | Potri.013G035200.2 | 0 | 6.0245 | -12.5566 | Down | 1.23E-29 | 7.39E-29 |
| Unigene113784 | Potri.010G021000.1 | 0 | 6.0278 | -12.5574 | Down | 3.99E-13 | 1.34E-12 |
| Unigene97217  | Potri.014G058500.2 | 0 | 6.0372 | -12.5597 | Down | 6.65E-11 | 2.00E-10 |
| Unigene116974 | Potri.004G065400.1 | 0 | 6.0456 | -12.5617 | Down | 6.17E-17 | 2.44E-16 |
| Unigene104365 | Potri.011G036400.3 | 0 | 6.0461 | -12.5618 | Down | 3.55E-32 | 2.29E-31 |
| Unigene103596 | Potri.001G304200.1 | 0 | 6.0511 | -12.563  | Down | 3.99E-13 | 1.34E-12 |
| Unigene108169 | Potri.005G001700.1 | 0 | 6.0768 | -12.5691 | Down | 1.38E-10 | 4.08E-10 |
| Unigene114505 | Potri.015G056400.1 | 0 | 6.0797 | -12.5698 | Down | 9.24E-14 | 3.19E-13 |
| Unigene102668 | Potri.001G362200.1 | 0 | 6.1007 | -12.5748 | Down | 2.39E-15 | 8.83E-15 |
| Unigene102253 | Potri.013G034400.1 | 0 | 6.122  | -12.5798 | Down | 3.99E-13 | 1.34E-12 |
| Unigene115834 | Potri.010G046000.6 | 0 | 6.1617 | -12.5891 | Down | 2.39E-15 | 8.83E-15 |
| Unigene117104 | Potri.005G120700.2 | 0 | 6.1734 | -12.5918 | Down | 1.43E-17 | 5.81E-17 |
| Unigene96617  | Potri.015G000700.1 | 0 | 6.2075 | -12.5998 | Down | 7.68E-19 | 3.27E-18 |
| Unigene103506 | Potri.003G201800.1 | 0 | 6.2222 | -12.6032 | Down | 5.53E-16 | 2.10E-15 |
| Unigene109267 | Potri.001G182500.1 | 0 | 6.2259 | -12.6041 | Down | 3.20E-11 | 9.78E-11 |
| Unigene119401 | Potri.006G087600.1 | 0 | 6.2908 | -12.619  | Down | 1.42E-37 | 1.05E-36 |
| Unigene102697 | Potri.007G126200.1 | 0 | 6.2941 | -12.6198 | Down | 2.21E-21 | 1.03E-20 |
| Unigene119334 | Potri.008G155500.1 | 0 | 6.3206 | -12.6258 | Down | 2.37E-35 | 1.66E-34 |
| Unigene118800 | Potri.006G141600.1 | 0 | 6.345  | -12.6314 | Down | 1.65E-25 | 8.76E-25 |
| Unigene109429 | Potri.006G078300.1 | 0 | 6.3846 | -12.6404 | Down | 1.54E-11 | 4.78E-11 |
| Unigene113684 | Potri.006G075200.1 | 0 | 6.386  | -12.6407 | Down | 9.24E-14 | 3.19E-13 |
| Unigene104777 | Potri.001G306100.1 | 0 | 6.3982 | -12.6435 | Down | 7.68E-19 | 3.27E-18 |
| Unigene115462 | Potri.003G157300.1 | 0 | 6.5128 | -12.6691 | Down | 1.15E-15 | 4.31E-15 |

|               |                    |   |        |          |      |          |          |
|---------------|--------------------|---|--------|----------|------|----------|----------|
| Unigene101843 | Potri.001G463300.1 | 0 | 6.5295 | -12.6728 | Down | 6.34E-44 | 5.43E-43 |
| Unigene94621  | Potri.003G082300.1 | 0 | 6.579  | -12.6837 | Down | 1.72E-12 | 5.59E-12 |
| Unigene96269  | Potri.018G088100.1 | 0 | 6.6032 | -12.6889 | Down | 7.42E-12 | 2.34E-11 |
| Unigene100346 | Potri.001G270900.1 | 0 | 6.6128 | -12.691  | Down | 3.99E-13 | 1.34E-12 |
| Unigene114950 | Potri.008G205000.1 | 0 | 6.6255 | -12.6938 | Down | 2.39E-15 | 8.83E-15 |
| Unigene103060 | Potri.004G073000.1 | 0 | 6.6472 | -12.6985 | Down | 1.03E-14 | 3.71E-14 |
| Unigene114890 | Potri.017G116200.1 | 0 | 6.6494 | -12.699  | Down | 2.39E-15 | 8.83E-15 |
| Unigene104693 | Potri.010G154300.2 | 0 | 6.6723 | -12.704  | Down | 1.10E-28 | 6.45E-28 |
| Unigene102951 | Potri.007G015200.1 | 0 | 6.7823 | -12.7276 | Down | 1.92E-13 | 6.53E-13 |
| Unigene115899 | Potri.T020000.1    | 0 | 6.7862 | -12.7284 | Down | 6.17E-17 | 2.44E-16 |
| Unigene99238  | Potri.011G045700.1 | 0 | 6.7868 | -12.7285 | Down | 8.28E-13 | 2.73E-12 |
| Unigene110516 | Potri.013G034300.1 | 0 | 6.8171 | -12.7349 | Down | 8.28E-13 | 2.73E-12 |
| Unigene117692 | Potri.008G056500.1 | 0 | 6.8219 | -12.736  | Down | 4.60E-21 | 2.12E-20 |
| Unigene116997 | Potri.018G077400.1 | 0 | 6.8551 | -12.743  | Down | 3.70E-19 | 1.60E-18 |
| Unigene104881 | Potri.007G044700.1 | 0 | 7.0006 | -12.7733 | Down | 3.43E-25 | 1.80E-24 |
| Unigene114089 | Potri.018G088100.1 | 0 | 7.002  | -12.7736 | Down | 2.39E-15 | 8.83E-15 |
| Unigene97078  | Potri.T077100.1    | 0 | 7.101  | -12.7938 | Down | 1.03E-14 | 3.71E-14 |
| Unigene99730  | Potri.T031500.1    | 0 | 7.1124 | -12.7961 | Down | 1.92E-13 | 6.53E-13 |
| Unigene112939 | Potri.001G365200.1 | 0 | 7.1296 | -12.7996 | Down | 1.03E-14 | 3.71E-14 |
| Unigene118510 | Potri.001G416500.3 | 0 | 7.1599 | -12.8057 | Down | 3.82E-26 | 2.07E-25 |
| Unigene107584 | Potri.003G100300.1 | 0 | 7.1617 | -12.8061 | Down | 3.57E-12 | 1.14E-11 |
| Unigene116595 | Potri.014G093600.1 | 0 | 7.1936 | -12.8125 | Down | 3.70E-19 | 1.60E-18 |
| Unigene104880 | Potri.012G017800.1 | 0 | 7.2153 | -12.8168 | Down | 1.33E-23 | 6.64E-23 |
| Unigene97964  | Potri.016G011400.1 | 0 | 7.2222 | -12.8182 | Down | 3.99E-13 | 1.34E-12 |
| Unigene106434 | Potri.008G073400.1 | 0 | 7.2465 | -12.8231 | Down | 1.07E-21 | 5.02E-21 |
| Unigene100752 | Potri.015G143300.3 | 0 | 7.2491 | -12.8236 | Down | 2.39E-15 | 8.83E-15 |
| Unigene119421 | Potri.013G035200.5 | 0 | 7.2491 | -12.8236 | Down | 1.47E-44 | 1.28E-43 |
| Unigene109626 | Potri.004G221700.2 | 0 | 7.2557 | -12.8249 | Down | 3.99E-13 | 1.34E-12 |
| Unigene103836 | Potri.016G011200.5 | 0 | 7.2716 | -12.8281 | Down | 8.28E-13 | 2.73E-12 |
| Unigene100138 | Potri.007G141500.1 | 0 | 7.3324 | -12.8401 | Down | 3.43E-25 | 1.80E-24 |
| Unigene102745 | Potri.013G146200.1 | 0 | 7.4074 | -12.8548 | Down | 1.92E-13 | 6.53E-13 |
| Unigene97066  | Potri.010G155100.2 | 0 | 7.4904 | -12.8708 | Down | 3.07E-24 | 1.57E-23 |
| Unigene113105 | Potri.T061600.1    | 0 | 7.5548 | -12.8832 | Down | 1.15E-15 | 4.31E-15 |
| Unigene103410 | Potri.005G008400.1 | 0 | 7.6079 | -12.8933 | Down | 3.99E-13 | 1.34E-12 |
| Unigene106992 | Potri.004G095700.2 | 0 | 7.6462 | -12.9005 | Down | 2.55E-29 | 1.52E-28 |
| Unigene104317 | Potri.019G086400.1 | 0 | 7.71   | -12.9125 | Down | 3.55E-32 | 2.29E-31 |
| Unigene112864 | Potri.007G008100.2 | 0 | 7.8093 | -12.931  | Down | 5.53E-16 | 2.10E-15 |
| Unigene103648 | Potri.002G116300.1 | 0 | 7.8501 | -12.9385 | Down | 4.45E-14 | 1.56E-13 |
| Unigene116487 | Potri.013G066100.1 | 0 | 7.8868 | -12.9452 | Down | 9.55E-21 | 4.36E-20 |

|               |                    |   |         |          |      |          |          |
|---------------|--------------------|---|---------|----------|------|----------|----------|
| Unigene98226  | Potri.019G072300.1 | 0 | 8.0015  | -12.9661 | Down | 4.96E-15 | 1.81E-14 |
| Unigene97808  | Potri.009G117200.1 | 0 | 8.037   | -12.9724 | Down | 2.64E-36 | 1.90E-35 |
| Unigene113082 | Potri.003G154600.1 | 0 | 8.037   | -12.9724 | Down | 1.28E-16 | 5.01E-16 |
| Unigene111052 | Potri.018G088100.1 | 0 | 8.0721  | -12.9787 | Down | 2.39E-15 | 8.83E-15 |
| Unigene101659 | Potri.001G226100.1 | 0 | 8.0892  | -12.9818 | Down | 1.98E-20 | 8.97E-20 |
| Unigene103501 | Potri.001G167800.1 | 0 | 8.1352  | -12.99   | Down | 1.42E-37 | 1.05E-36 |
| Unigene98849  | Potri.001G071500.1 | 0 | 8.1557  | -12.9936 | Down | 3.31E-18 | 1.38E-17 |
| Unigene104899 | Potri.001G079500.1 | 0 | 8.2245  | -13.0057 | Down | 5.05E-62 | 6.23E-61 |
| Unigene117185 | Potri.018G028700.1 | 0 | 8.2904  | -13.0172 | Down | 1.33E-23 | 6.64E-23 |
| Unigene104241 | Potri.014G060400.1 | 0 | 8.4402  | -13.0431 | Down | 5.13E-22 | 2.44E-21 |
| Unigene99594  | Potri.014G109000.1 | 0 | 8.466   | -13.0475 | Down | 1.48E-24 | 7.63E-24 |
| Unigene95616  | Potri.001G129600.1 | 0 | 8.5819  | -13.0671 | Down | 9.55E-21 | 4.36E-20 |
| Unigene107118 | Potri.009G140900.1 | 0 | 8.616   | -13.0728 | Down | 1.97E-40 | 1.56E-39 |
| Unigene105427 | Potri.018G067200.2 | 0 | 8.6645  | -13.0809 | Down | 3.70E-19 | 1.60E-18 |
| Unigene113218 | Potri.011G155300.1 | 0 | 8.7706  | -13.0985 | Down | 3.31E-18 | 1.38E-17 |
| Unigene101958 | Potri.006G019500.4 | 0 | 8.8742  | -13.1154 | Down | 1.43E-17 | 5.81E-17 |
| Unigene108450 | Potri.017G143900.1 | 0 | 8.93    | -13.1244 | Down | 2.39E-15 | 8.83E-15 |
| Unigene118717 | Potri.004G164700.1 | 0 | 8.93    | -13.1244 | Down | 2.12E-34 | 1.45E-33 |
| Unigene99019  | Potri.T133000.1    | 0 | 8.9495  | -13.1276 | Down | 6.17E-17 | 2.44E-16 |
| Unigene113742 | Potri.001G019000.1 | 0 | 9.1542  | -13.1602 | Down | 1.78E-19 | 7.77E-19 |
| Unigene117420 | Potri.001G121900.1 | 0 | 9.2393  | -13.1736 | Down | 4.27E-27 | 2.38E-26 |
| Unigene104815 | Potri.T144400.1    | 0 | 9.4084  | -13.1997 | Down | 1.78E-19 | 7.77E-19 |
| Unigene99503  | Potri.012G028500.1 | 0 | 9.4479  | -13.2058 | Down | 1.48E-24 | 7.63E-24 |
| Unigene108511 | Potri.013G025900.1 | 0 | 9.6599  | -13.2378 | Down | 1.28E-16 | 5.01E-16 |
| Unigene98115  | Potri.018G014600.1 | 0 | 9.7252  | -13.2475 | Down | 1.43E-17 | 5.81E-17 |
| Unigene96808  | Potri.019G077200.1 | 0 | 9.7449  | -13.2504 | Down | 1.53E-31 | 9.70E-31 |
| Unigene117369 | Potri.009G124400.1 | 0 | 9.7657  | -13.2535 | Down | 2.29E-28 | 1.33E-27 |
| Unigene116711 | Potri.014G116000.1 | 0 | 9.7715  | -13.2544 | Down | 3.82E-26 | 2.07E-25 |
| Unigene94759  | Potri.018G043500.1 | 0 | 10.0046 | -13.2884 | Down | 8.57E-20 | 3.78E-19 |
| Unigene119366 | Potri.016G073700.1 | 0 | 10.1024 | -13.3024 | Down | 6.78E-58 | 7.75E-57 |
| Unigene114330 | Potri.008G191800.1 | 0 | 10.4961 | -13.3576 | Down | 5.72E-23 | 2.81E-22 |
| Unigene115424 | Potri.016G051900.2 | 0 | 10.5677 | -13.3674 | Down | 7.12E-25 | 3.71E-24 |
| Unigene104662 | Potri.012G031100.7 | 0 | 10.7097 | -13.3866 | Down | 1.27E-36 | 9.20E-36 |
| Unigene114781 | Potri.017G147800.1 | 0 | 11.2111 | -13.4526 | Down | 3.43E-25 | 1.80E-24 |
| Unigene107952 | Potri.017G098200.2 | 0 | 11.2282 | -13.4548 | Down | 7.68E-19 | 3.27E-18 |
| Unigene117778 | Potri.002G030500.1 | 0 | 11.2561 | -13.4584 | Down | 1.02E-34 | 7.03E-34 |
| Unigene95371  | Potri.012G027000.1 | 0 | 11.7498 | -13.5203 | Down | 3.74E-86 | 6.67E-85 |
| Unigene108936 | Potri.001G094800.1 | 0 | 11.9984 | -13.5506 | Down | 9.55E-21 | 4.36E-20 |
| Unigene108065 | Potri.004G216900.2 | 0 | 12.1536 | -13.5691 | Down | 1.98E-20 | 8.97E-20 |

|               |                    |   |         |          |      |           |           |
|---------------|--------------------|---|---------|----------|------|-----------|-----------|
| Unigene100038 | Potri.012G025900.1 | 0 | 12.188  | -13.5732 | Down | 1.47E-44  | 1.28E-43  |
| Unigene106321 | Potri.009G010700.3 | 0 | 12.437  | -13.6024 | Down | 2.60E-76  | 4.04E-75  |
| Unigene107908 | Potri.018G152200.3 | 0 | 12.6071 | -13.6219 | Down | 4.60E-21  | 2.12E-20  |
| Unigene111036 | Potri.013G106700.1 | 0 | 12.6346 | -13.6251 | Down | 1.33E-23  | 6.64E-23  |
| Unigene97503  | Potri.001G167800.1 | 0 | 12.9603 | -13.6618 | Down | 3.16E-51  | 3.16E-50  |
| Unigene119267 | Potri.001G288600.1 | 0 | 13.1896 | -13.6871 | Down | 1.09E-68  | 1.49E-67  |
| Unigene103627 | Potri.013G025900.1 | 0 | 13.3523 | -13.7048 | Down | 9.17E-34  | 6.15E-33  |
| Unigene103919 | Potri.001G167800.1 | 0 | 13.4277 | -13.7129 | Down | 3.05E-44  | 2.63E-43  |
| Unigene109348 | Potri.002G026500.1 | 0 | 13.5203 | -13.7228 | Down | 1.33E-23  | 6.64E-23  |
| Unigene105518 | Potri.018G079100.1 | 0 | 13.6478 | -13.7364 | Down | 4.92E-35  | 3.41E-34  |
| Unigene117139 | Potri.018G009300.1 | 0 | 14.1285 | -13.7863 | Down | 1.77E-39  | 1.37E-38  |
| Unigene101345 | Potri.016G012000.1 | 0 | 14.1361 | -13.7871 | Down | 1.74E-79  | 2.84E-78  |
| Unigene117392 | Potri.016G083900.1 | 0 | 14.2159 | -13.7952 | Down | 4.56E-41  | 3.67E-40  |
| Unigene110543 | Potri.003G066400.3 | 0 | 14.7107 | -13.8446 | Down | 8.86E-27  | 4.90E-26  |
| Unigene99622  | Potri.001G167900.1 | 0 | 14.8901 | -13.8621 | Down | 4.27E-27  | 2.38E-26  |
| Unigene102407 | Potri.001G088900.1 | 0 | 15.0488 | -13.8774 | Down | 1.23E-29  | 7.39E-29  |
| Unigene108015 | Potri.018G141700.1 | 0 | 15.3649 | -13.9074 | Down | 1.65E-25  | 8.76E-25  |
| Unigene107941 | Potri.001G017900.1 | 0 | 16.1529 | -13.9795 | Down | 8.86E-27  | 4.90E-26  |
| Unigene105620 | Potri.018G135300.1 | 0 | 16.7003 | -14.0276 | Down | 1.05E-61  | 1.29E-60  |
| Unigene119233 | Potri.T113400.1    | 0 | 17.2493 | -14.0743 | Down | 2.01E-87  | 3.64E-86  |
| Unigene119329 | Potri.011G045700.1 | 0 | 17.6138 | -14.1044 | Down | 1.24E-96  | 2.54E-95  |
| Unigene116350 | Potri.006G179300.1 | 0 | 17.8036 | -14.1199 | Down | 3.40E-45  | 3.00E-44  |
| Unigene98924  | Potri.004G142900.1 | 0 | 18.1669 | -14.149  | Down | 1.69E-159 | 6.54E-158 |
| Unigene119414 | Potri.006G267200.1 | 0 | 19.7234 | -14.2676 | Down | 1.71E-119 | 4.59E-118 |
| Unigene118189 | Potri.001G191800.1 | 0 | 20.7721 | -14.3424 | Down | 1.09E-68  | 1.49E-67  |
| Unigene114184 | Potri.001G092200.1 | 0 | 21.7544 | -14.409  | Down | 1.83E-46  | 1.66E-45  |
| Unigene104228 | Potri.001G064900.1 | 0 | 25.1986 | -14.6211 | Down | 4.53E-61  | 5.49E-60  |
| Unigene118805 | Potri.004G162600.1 | 0 | 25.5724 | -14.6423 | Down | 9.27E-101 | 2.00E-99  |
| Unigene117984 | Potri.010G220900.1 | 0 | 26.0141 | -14.667  | Down | 2.41E-82  | 4.08E-81  |
| Unigene117410 | Potri.016G007900.1 | 0 | 26.6785 | -14.7034 | Down | 1.25E-76  | 1.96E-75  |
| Unigene118517 | Potri.014G050400.1 | 0 | 27.5045 | -14.7474 | Down | 1.55E-98  | 3.26E-97  |
| Unigene117019 | Potri.T003000.1    | 0 | 28.0472 | -14.7756 | Down | 2.60E-76  | 4.04E-75  |
| Unigene112810 | Potri.001G451900.2 | 0 | 28.1459 | -14.7806 | Down | 1.13E-55  | 1.24E-54  |
| Unigene115093 | Potri.003G050200.1 | 0 | 29.3552 | -14.8413 | Down | 3.77E-66  | 4.99E-65  |
| Unigene113992 | Potri.018G088100.1 | 0 | 32.3926 | -14.9834 | Down | 4.69E-68  | 6.39E-67  |
| Unigene111516 | Potri.T002300.1    | 0 | 32.7691 | -15      | Down | 4.53E-61  | 5.49E-60  |
| Unigene109072 | Potri.005G058200.1 | 0 | 33.1717 | -15.0177 | Down | 2.62E-56  | 2.91E-55  |
| Unigene118981 | Potri.017G150900.1 | 0 | 35.0504 | -15.0971 | Down | 2.72E-150 | 9.80E-149 |
| Unigene118585 | Potri.001G162600.1 | 0 | 48.7147 | -15.5721 | Down | 1.21E-176 | 5.35E-175 |



|               |                    |   |         |          |      |           |           |
|---------------|--------------------|---|---------|----------|------|-----------|-----------|
| Unigene118754 | Potri.017G150900.1 | 0 | 52.0827 | -15.6685 | Down | 1.66E-199 | 8.64E-198 |
| Unigene117949 | Potri.004G142900.1 | 0 | 53.4107 | -15.7048 | Down | 1.95E-167 | 8.07E-166 |
| Unigene109454 | Potri.018G088100.1 | 0 | 61.3058 | -15.9037 | Down | 6.91E-105 | 1.56E-103 |
| Unigene95364  | Potri.019G131600.2 | 0 | 63.5819 | -15.9563 | Down | 8.89E-114 | 2.24E-112 |

Those with an absolute value of  $\log_2\text{Ratio} \geq 2$ ,  $\text{FDR} < 0.001$ , and expressed at  $\geq 3$  RPKM in  $\geq 1$  sample were listed.

**Table S3. DEGs annotated as heat shock-related proteins.**

| Unigene ID     | V3 Model           | HS4 RPKM | CK RPKM | Log2 Ratio | pvalue | FDR | Annotation                                                      |  |  |
|----------------|--------------------|----------|---------|------------|--------|-----|-----------------------------------------------------------------|--|--|
| Unigene 113351 | Potri.001G042700.1 | 15844.94 | 2.7002  | 12.518668  | 0      | 0   | Heatshockpro-<br>tein70[Nicotianatabacum]                       |  |  |
| Unigene 119328 | Potri.008G062300.1 | 47289.22 | 17.0553 | 11.437075  | 0      | 0   | 18.5kDaclassIheatshockprot<br>ein;HSP18.5                       |  |  |
| Unigene 118411 | Potri.001G042700.1 | 10991.87 | 4.0369  | 11.410901  | 0      | 0   | Simi-<br>lartoPsHSP71.2[Vitisvinifer<br>a]                      |  |  |
| Unigene 94639  | Potri.001G042600.1 | 26841.17 | 10.1894 | 11.363163  | 0      | 0   | Heatshockpro-<br>tein70[Heveabrasiliensis]                      |  |  |
| Unigene 100860 | Potri.004G187400.1 | 36559.91 | 14.3068 | 11.319346  | 0      | 0   | Lowmolecularweightheatshockpro-<br>tein[Gossypiumhirsutum]      |  |  |
| Unigene 117613 | Potri.001G042700.1 | 8057.41  | 3.2407  | 11.279794  | 0      | 0   | Heatshockpro-<br>tein70[Nicotianatabacum]                       |  |  |
| Unigene 95724  | Potri.001G042600.1 | 19359.87 | 8.2444  | 11.197367  | 0      | 0   | Heatshockpro-<br>tein70[Heveabrasiliensis]                      |  |  |
| Unigene 100276 | Potri.004G187400.1 | 8410.55  | 3.7764  | 11.120974  | 0      | 0   | Heatshockpro-<br>tein[Jatrophaucurcas]                          |  |  |
| Unigene 26446  | Potri.009G049800.1 | 27827.96 | 12.5276 | 11.117209  | 0      | 0   | Heatshockpro-<br>tein[Pisumsativum]                             |  |  |
| Unigene 117236 | Potri.009G049900.1 | 12115.25 | 5.7081  | 11.051526  | 0      | 0   | HSP20.1protein[Solanumper<br>uvianum]                           |  |  |
| Unigene 118998 | Potri.004G073600.1 | 12629.44 | 5.9945  | 11.040863  | 0      | 0   | Heatshockpro-<br>tein[Heveabrasiliensis]                        |  |  |
| Unigene 110823 | Potri.010G195700.1 | 44167.45 | 21.5151 | 11.003418  | 0      | 0   | 18.2kDaclassIheatshockprot<br>ein[Medicagosativa]               |  |  |
| Unigene 109379 | Potri.009G049900.1 | 9124.62  | 4.6945  | 10.924577  | 0      | 0   | Heatshockpro-<br>tein[Pisumsativum]                             |  |  |
| Unigene 95258  | Potri.009G148000.1 | 24539.81 | 13.0011 | 10.882275  | 0      | 0   | 17.5kDaclassIheatshockprot<br>ein[Caricapapaya]                 |  |  |
| Unigene 100392 | Potri.009G147900.1 | 9575.381 | 5.211   | 10.843554  | 0      | 0   | 17.5kDaclassIheatshockprot<br>ein[Caricapapaya]                 |  |  |
| Unigene 36975  | Potri.010G053400.1 | 6910.439 | 3.9373  | 10.777355  | 0      | 0   | ChloroplastSmallheatshock-<br>protein[Epilobiumamurense]        |  |  |
| Unigene 119447 | Potri.006G223900.1 | 27636.34 | 16.6807 | 10.694171  | 0      | 0   | Smallmolecularheatshockpro<br>pro-<br>tein17.5[Nelumbonucifera] |  |  |
| Unigene 119010 | Potri.013G089200.1 | 6201.77  | 3.9744  | 10.607727  | 0      | 0   | 22.0kDaclassIVheatshockpr<br>oteinein[Glycinemax]               |  |  |

|                |                    |          |         |           |           |          |                                                                    |  |  |
|----------------|--------------------|----------|---------|-----------|-----------|----------|--------------------------------------------------------------------|--|--|
| Unigene 106116 | Potri.019G081200.1 | 19272.75 | 12.5105 | 10.589207 | 0         | 0        | HSP20.1protein[Solanumperuvianum]                                  |  |  |
| Unigene 119446 | Potri.003G109200.2 | 25888.9  | 20.1686 | 10.326007 | 0         | 0        | Lowmolecularweightheatshockprotein[Euphorbiaesula]                 |  |  |
| Unigene 115745 | Potri.012G022400.1 | 7345.876 | 5.8181  | 10.302171 | 0         | 0        | Heatshockprotein[Ammopiptanthusmongolicus]                         |  |  |
| Unigene 36846  | Potri.006G093500.1 | 4501.945 | 3.9588  | 10.151269 | 0         | 0        | 17.9kDaheatshockprotein(HSP17.9)[Pisumsativum]                     |  |  |
| Unigene 116444 | Potri.003G071100.1 | 21939.5  | 22.2971 | 9.942459  | 0         | 0        | 17.4kDaclassIIIheatshockprotein(HSP17.4-CIII)[Arabidopsisthaliana] |  |  |
| Unigene 115042 | Potri.004G187200.1 | 9970.13  | 11.5836 | 9.7493848 | 0         | 0        | CytosolicclassISmallheatshockprotein-type2[Rhododendronovatum]     |  |  |
| Unigene 99894  | Potri.004G073600.1 | 2548.663 | 3.1606  | 9.6553264 | 0         | 0        | Heatshockprotein83[Ipomoeanil]                                     |  |  |
| Unigene 115386 | Potri.003G071100.1 | 14341.55 | 24.9762 | 9.165431  | 0         | 0        | Smallheatstressprotein-classCIII[Solanumperuvianum]                |  |  |
| Unigene 105373 | Potri.008G054000.1 | 3593.056 | 7.1296  | 8.9771747 | 0         | 0        | Heatshockprotein70[Gossypiumhirsutum]                              |  |  |
| Unigene 101586 | Potri.010G206600.1 | 10576.46 | 22.289  | 8.8903094 | 0         | 0        | SimilartoHSC70-1(heatshockcognate70kDaprotein1)[Vitisvinifera]     |  |  |
| Unigene 113828 | Potri.010G206600.1 | 6173.219 | 13.4466 | 8.8426377 | 0         | 0        | Heatshockprotein70[Dactylisglomerata]                              |  |  |
| Unigene 118352 | Potri.015G056900.1 | 5756.333 | 12.96   | 8.7949406 | 0         | 0        | AtHSP101[Arabidopsislyrata subsp.lyrata]                           |  |  |
| Unigene 105915 | Potri.015G057000.1 | 5182.108 | 13.4638 | 8.5883096 | 0         | 0        | Heatshockprotein[VitislabruscaxVitisvinifera]                      |  |  |
| Unigene 105915 | Potri.015G057000.1 | 5182.108 | 13.4638 | 8.5883096 | 0         | 0        | Heatshockprotein[VitislabruscaxVitisvinifera]                      |  |  |
| Unigene 106538 | Potri.010G206600.1 | 5530.709 | 14.5213 | 8.5731501 | 0         | 0        | SimilartoHSC70-1(heatshockcognate70kDaprotein1)[Vitisvinifera]     |  |  |
| Unigene 94526  | Potri.017G146600.1 | 7593.803 | 23.7351 | 8.3216566 | 0         | 0        | Heatshockprotein[Heveabrsiliensis]                                 |  |  |
| Unigene 75435  | Potri.001G108100.2 | 105.6539 | 0.3637  | 8.1823814 | 1.49E-174 | 6.5E-173 | Heatshocktranscriptionfactor29[Glycinemax]                         |  |  |
| Unigene 94560  | Potri.017G146600.1 | 3358.369 | 11.6406 | 8.1724514 | 0         | 0        | Heatshockprotein[Heveabrsiliensis]                                 |  |  |
| Unigene 111455 | Potri.010G088600.1 | 961.3039 | 3.9668  | 7.9208731 | 0         | 0        | HSP70T-2[Arabidopsislyrata subsp.lyrata]                           |  |  |
| Unigene 95556  | Potri.010G088600.1 | 1200.488 | 5.1483  | 7.8653091 | 0         | 0        | HSP70T-2[Arabidopsislyrata subsp.lyrata]                           |  |  |
| Unigene        | Potri.017G146600.1 | 9808.059 | 43.8962 | 7.8037278 | 0         | 0        | Heatshockpro-                                                      |  |  |

|                |                    |          |         |           |           |           |                                                                |  |  |
|----------------|--------------------|----------|---------|-----------|-----------|-----------|----------------------------------------------------------------|--|--|
| 119411         |                    |          |         |           |           |           | tein[Heveabraciliensis]                                        |  |  |
| Unigene 117980 | Potri.009G039200.1 | 13334.45 | 60.9358 | 7.7736523 | 0         | 0         | 17.6kDaClassIheatshockprotein;AltName:HSP20.0                  |  |  |
| Unigene 117779 | Potri.011G057600.1 | 1328.76  | 6.5052  | 7.6742713 | 0         | 0         | DnaJsubfamilyBmember5[Zeamays]                                 |  |  |
| Unigene 119554 | Potri.006G226800.3 | 6994.163 | 37.1552 | 7.5564434 | 0         | 0         | AtHSPA2[Arabidopsislyrata subsp.lyrata]                        |  |  |
| Unigene 103826 | Potri.005G214800.2 | 640.5644 | 4.4039  | 7.1844181 | 0         | 0         | AtHSPA7A[Arabidopsislyrata subsp.lyrata]                       |  |  |
| Unigene 100969 | Potri.005G214800.2 | 574.1132 | 4.4426  | 7.0137872 | 0         | 0         | AtHSPA6B[Arabidopsislyrata subsp.lyrata]                       |  |  |
| Unigene 31571  | Potri.017G146600.1 | 2156.245 | 16.7746 | 7.0060988 | 0         | 0         | Heatshockprotein83[Ipomoeanil]                                 |  |  |
| Unigene 98623  | Potri.016G003400.3 | 111.7365 | 1.0483  | 6.7359051 | 6.85E-185 | 3.24E-183 | Heatshockprotein90[Triticumaestivum]                           |  |  |
| Unigene 78350  | Potri.005G241100.4 | 15.8049  | 0.1703  | 6.5361497 | 1.57E-27  | 8.89E-27  | Heatshockprotein90[Oryzasativa Japonica Group]                 |  |  |
| Unigene 102654 | Potri.002G048200.1 | 80.0048  | 0.9318  | 6.4239224 | 6.98E-196 | 3.54E-194 | AtHSPA7A[Arabidopsislyrata subsp.lyrata]                       |  |  |
| Unigene 110294 | Potri.016G003400.3 | 2351.552 | 41.4523 | 5.8260171 | 0         | 0         | HSPprotein[Zeamays]                                            |  |  |
| Unigene 26341  | Potri.017G130700.2 | 1175.994 | 22.6717 | 5.6968438 | 0         | 0         | PeroxisomalSmallheatshockprotein[Glycinemax]                   |  |  |
| Unigene 111511 | Potri.001G286700.1 | 3538.975 | 69.8498 | 5.6629317 | 0         | 0         | Heatshockprotein80[Euphorbiaesula]                             |  |  |
| Unigene 116440 | Potri.007G136700.1 | 1809.788 | 38.4216 | 5.5577595 | 0         | 0         | DnaJsubfamilyBmember5[Zeamays]                                 |  |  |
| Unigene 84251  | Potri.005G160200.1 | 39.1847  | 0.8704  | 5.4924681 | 1.28E-73  | 1.91E-72  | PutativeDnaJprotein[Arabidopsisthaliana]                       |  |  |
| Unigene 114471 | Potri.016G003400.2 | 2635.006 | 59.8313 | 5.460762  | 0         | 0         | Heatshockprotein90-2[Cryptocoryneciliata]                      |  |  |
| Unigene 119453 | Potri.004G086900.1 | 358.8282 | 11.7103 | 4.9374433 | 0         | 0         | Calmodulin-bindingheatshockprotein[Nicotianatabacum]           |  |  |
| Unigene 109525 | Potri.001G285500.1 | 1336.018 | 58.6891 | 4.5087028 | 0         | 0         | Heatshock70kDaprotein,mitochondrial;HSP68[Solanumtuberosum]    |  |  |
| Unigene 57977  | Potri.011G164000.1 | 5.1018   | 0.2443  | 4.3842806 | 4.03E-21  | 1.86E-20  | Heatshockprotein[Stylosantheshamata]                           |  |  |
| Unigene 107309 | Potri.001G285500.1 | 741.7015 | 45.6102 | 4.0234103 | 0         | 0         | Similar to heatshock70kDaprotein,mitochondrial[Vitis vinifera] |  |  |
| Unigene 60590  | Potri.006G034600.1 | 8.1574   | 0.5095  | 4.0009553 | 6.33E-30  | 3.83E-29  | MitochondrialSmallheatshockprotein[Capsicumannuum]             |  |  |
| Unigene 96730  | Potri.001G054400.1 | 207.5443 | 15.0089 | 3.7895292 | 0         | 0         | HSP60-2[Cucurbitacv.KurokawaAm]                                |  |  |

|                   |                    |          |         |           |           |           |                                                                                |  |  |
|-------------------|--------------------|----------|---------|-----------|-----------|-----------|--------------------------------------------------------------------------------|--|--|
|                   |                    |          |         |           |           |           | akuri]                                                                         |  |  |
| Unigene<br>111410 | Potri.003G055800.5 | 1245.676 | 108.604 | 3.5197801 | 0         | 0         | Heatshockpro-<br>tein(HSP110/SSE1 subfamily)precursor[Phillyr<br>ealatifolia]  |  |  |
| Unigene<br>98413  | Potri.003G173900.1 | 155.8651 | 13.6141 | 3.5171244 | 0         | 0         | HSP60-<br>2[Cucurbitacv.KurokawaAm<br>akuri]                                   |  |  |
| Unigene<br>36697  | Potri.003G173900.2 | 276.1024 | 24.3652 | 3.5023095 | 0         | 0         | HSP60-<br>2[Cucurbitacv.KurokawaAm<br>akuri]                                   |  |  |
| Unigene<br>37120  | Potri.004G086900.1 | 55.2943  | 4.9024  | 3.4955707 | 3.54E-150 | 1.27E-148 | Calmodulin-bindingheat-<br>shockpro-<br>tein[Nicotianatabacum]                 |  |  |
| Unigene<br>116856 | Potri.001G054400.1 | 155.7674 | 13.9149 | 3.4846909 | 5.88E-260 | 4.28E-258 | Chaperonin-<br>HSP60[Arabidopsisthaliana]                                      |  |  |
| Unigene<br>63231  | Potri.004G224400.3 | 33.5364  | 3.1003  | 3.4352481 | 3.34E-112 | 8.27E-111 | Chloroplas-<br>plas-<br>tHSP70[Cucumissativus]                                 |  |  |
| Unigene<br>107022 | Potri.005G160200.1 | 93.8643  | 8.7587  | 3.4217879 | 0         | 0         | PutativeDnaJpro-<br>tein[Arabidopsisthaliana]                                  |  |  |
| Unigene<br>118027 | Potri.004G086900.1 | 160.3602 | 15.6331 | 3.3586403 | 0         | 0         | Calmodulin-bindingheat-<br>shockpro-<br>tein[Nicotianatabacum]                 |  |  |
| Unigene<br>94720  | Potri.001G286700.1 | 276.3177 | 27.571  | 3.3251045 | 3.24E-294 | 2.8E-292  | Heatshockpro-<br>tein90[Ageratinaadenophora<br>]                               |  |  |
| Unigene<br>115830 | Potri.017G090600.1 | 290.4392 | 32.684  | 3.1515797 | 0         | 0         | Heatshockpro-<br>tein[Solanumlycopersicum]                                     |  |  |
| Unigene<br>115617 | Potri.001G108100.2 | 275.4331 | 34.0344 | 3.0166364 | 0         | 0         | Heatshocktranscriptionfac-<br>tor29[Glycinemax]                                |  |  |
| Unigene<br>37227  | Potri.012G017600.2 | 151.1394 | 18.9722 | 2.9939209 | 2.38E-176 | 1.06E-174 | Heatshockpro-<br>tein70[Cucumissativus]                                        |  |  |
| Unigene<br>22202  | Potri.008G152000.1 | 40.5935  | 5.3928  | 2.9121423 | 1.63E-197 | 8.33E-196 | HSP70T-<br>2[Arabidopsislyratasubsp.lyr<br>ata]                                |  |  |
| Unigene<br>117013 | Potri.001G108100.2 | 224.0161 | 30.6397 | 2.8701283 | 0         | 0         | HSFB2B;HeatstresstranscriptionfactorB-<br>2b;AltName:HSF7[Arabidopsisthaliana] |  |  |
| Unigene<br>22224  | Potri.015G039500.1 | 44.253   | 6.2356  | 2.827175  | 4.84E-168 | 2.02E-166 | Calmodulin24-<br>likepro-<br>tein[PopulustremulaxPopulu<br>salba]              |  |  |
| Unigene<br>107803 | Potri.004G224400.3 | 573.4576 | 84.1316 | 2.7689671 | 0         | 0         | Chloroplas-<br>plas-<br>tHSP70[Cucumissativus]                                 |  |  |
| Unigene<br>107411 | Potri.009G079700.1 | 61.7308  | 9.4435  | 2.7085969 | 1.86E-49  | 1.8E-48   | Similar to Heat-<br>shock70kDaprotein,mitochondrial[Vitis<br>vinifera]         |  |  |
| Unigene<br>115977 | Potri.017G090600.1 | 342.935  | 59.8812 | 2.5177601 | 0         | 0         | Heatshockpro-<br>tein[Solanumlycopersicum]                                     |  |  |
| Unigene           | Potri.004G224400.3 | 170.4907 | 34.4909 | 2.3054054 | 4.2E-137  | 1.34E-135 | DnaK-<br>typemolecularchaper-                                                  |  |  |

|                |                    |          |         |           |            |            |                                                                           |  |  |
|----------------|--------------------|----------|---------|-----------|------------|------------|---------------------------------------------------------------------------|--|--|
| 55134          |                    |          |         |           |            |            | oneHSP70bprecursor[Ostreococcustauri]                                     |  |  |
| Unigene 12990  | Potri.008G152000.1 | 27.7371  | 5.823   | 2.2519824 | 1.39E-110  | 3.38E-109  | HSP70T-2[Arabidopsislyrata]                                               |  |  |
| Unigene 117186 | Potri.007G043800.1 | 337.406  | 74.6132 | 2.1769828 | 0          | 0          | Heatstresstranscriptionfactor[Caricapapaya]                               |  |  |
| Unigene 33851  | Potri.008G112700.1 | 98.0721  | 21.9979 | 2.156477  | 1.97E-136  | 6.23E-135  | Heatshockprotein90[Ipomoeanil]                                            |  |  |
| Unigene 4476   | Potri.009G079700.1 | 94.6106  | 21.4321 | 2.1422286 | 3.04E-89   | 5.64E-88   | Similaroheatshock70kDaprotein,mitochondrial[Vitisvinifera]                |  |  |
| Unigene 34965  | Potri.006G115700.1 | 192.7981 | 44.2961 | 2.1218392 | 0          | 0          | HeatstresstranscriptionfactorA3[Solanumlycopersicum]                      |  |  |
| Unigene 72463  | Potri.010G136800.1 | 5.7661   | 1.3589  | 2.0851566 | 0.00011    | 0.00021    | Heatshockprotein90[Ipomoeanil]                                            |  |  |
| Unigene 108807 | Potri.008G112700.1 | 186.4977 | 45.5432 | 2.0338503 | 2.54E-109  | 6.07E-108  | Heatshockprotein[Secalecereale]                                           |  |  |
| Unigene 88221  | Potri.001G192600.1 | 79.5875  | 0       | ---       | 6.93E-201  | 3.62E-199  | 26.5kDa class I small heat shock protein (HSP26.5-P)[Arabidopsisthaliana] |  |  |
| Unigene 66136  | Potri.004G191100.1 | 7.4752   | 0       | ---       | 2.58E-56   | 2.86E-55   | Heatshockfamilyprotein[Arabidopsislyrata]                                 |  |  |
| Unigene 77515  | Potri.011G081500.1 | 3.0679   | 0       | ---       | 0.00000396 | 0.00000869 | Heatshockproteinbinding[Arabidopsisthaliana]                              |  |  |
| Unigene 68598  | Potri.015G005800.1 | 4.8576   | 0       | ---       | 1.16E-24   | 5.99E-24   | Chloroplastsmallheatshockprotein[Seneciocrataegifolius]                   |  |  |
| Unigene 63572  | Potri.014G164900.7 | 6.7494   | 0       | ---       | 5.79E-17   | 2.29E-16   | Heatshockprotein83[Zeamays]                                               |  |  |
| Unigene 87637  | Potri.005G160200.1 | 15.5512  | 0       | ---       | 1.23E-38   | 9.36E-38   | Heatshockproteinbinding,PutativeDnaJprotein[Arabidopsisthaliana]          |  |  |
| Unigene 32799  | Potri.009G046700.1 | 9.1433   | 37.8737 | -2.05041  | 1.76E-122  | 4.86E-121  | Heat shock protein-related [Arabidopsis thaliana]                         |  |  |
| Unigene 33935  | Potri.006G175200.1 | 7.9198   | 33.1666 | -2.066195 | 5.88E-57   | 6.61E-56   | Heat shock protein-related [Arabidopsis thaliana]                         |  |  |
| Unigene 26468  | Potri.003G131900.1 | 0.9764   | 4.1027  | -2.071029 | 0.00000738 | 0.0000158  | Heat shock protein [Hevea brasiliensis]                                   |  |  |
| Unigene 23707  | Potri.001G252500.2 | 8.4348   | 37.8563 | -2.166108 | 1.25E-102  | 2.75E-101  | Heat shock protein-related [Arabidopsis thaliana]                         |  |  |
| Unigene 34793  | Potri.010G148900.2 | 10.7694  | 48.3976 | -2.167998 | 2.39E-203  | 1.27E-201  | Heat shock protein DnaJ [Medicago truncatula]                             |  |  |
| Unigene 52505  | Potri.007G135700.1 | 5.0709   | 23.3098 | -2.200623 | 1.7E-25    | 9.04E-25   | Heat shock protein DnaJ [Medicago truncatula]                             |  |  |
| Unigene 41752  | Potri.014G083600.1 | 2.6233   | 12.0997 | -2.205517 | 1.16E-18   | 4.9E-18    | Calmodulin binding heat shock protein [Gossypium hirsutum]                |  |  |
| Unigene        | Potri.012G142700.1 | 2.8226   | 13.0713 | -2.211306 | 2.71E-104  | 6.1E-103   | Calmodulin binding heat shock protein                                     |  |  |

|                |                    |         |         |           |             |             |                                                                            |  |  |
|----------------|--------------------|---------|---------|-----------|-------------|-------------|----------------------------------------------------------------------------|--|--|
| 21238          |                    |         |         |           |             |             | [Gossypium hirsutum]                                                       |  |  |
| Unigene 6401   | Potri.002G033800.1 | 1.7196  | 8.2488  | -2.262111 | 1.1E-25     | 5.9E-25     | Heat shock protein binding [Arabidopsis thaliana]                          |  |  |
| Unigene 30636  | Potri.014G114100.1 | 4.2739  | 20.9298 | -2.291933 | 6.85E-41    | 5.49E-40    | Heat shock protein DnaJ, N-terminal [Medicago truncatula]                  |  |  |
| Unigene 52753  | Potri.006G175200.1 | 4.7458  | 24.2548 | -2.353547 | 3.57E-79    | 5.8E-78     | HSP101-like protein [Arabidopsis thaliana]                                 |  |  |
| Unigene 21734  | Potri.008G193500.1 | 9.0603  | 49.9008 | -2.461432 | 2.35E-157   | 8.97E-156   | Chaperone protein DnaJ 16; Short=AtJ16                                     |  |  |
| Unigene 115578 | Potri.002G124800.1 | 0.6365  | 3.5659  | -2.486034 | 0.000048    | 0.0000952   | Heat shock transcription factor (HSF) [Glycine max]                        |  |  |
| Unigene 7483   | Potri.006G175200.1 | 9.7553  | 57.7335 | -2.565151 | 7.13E-183   | 3.32E-181   | 101 kDa heat shock protein; HSP101-like protein [Arabidopsis thaliana]     |  |  |
| Unigene 22432  | Potri.006G175200.1 | 11.8031 | 73.913  | -2.646662 | 1.04E-231   | 6.42E-230   | 101 kDa heat shock protein; HSP101-like protein [Arabidopsis thaliana]     |  |  |
| Unigene 32688  | Potri.004G072200.1 | 11.2474 | 72.6772 | -2.691911 | 0           | 0           | Heat shock protein binding protein [Arabidopsis lyrata subsp. lyrata]      |  |  |
| Unigene 20353  | Potri.006G175200.1 | 1.9409  | 12.5465 | -2.692487 | 2.36E-23    | 1.17E-22    | Heat shock protein-related [Arabidopsis thaliana]                          |  |  |
| Unigene 45622  | Potri.010G148900.2 | 3.9281  | 26.2533 | -2.740595 | 2.13E-114   | 5.4E-113    | Heat shock protein DnaJ [Medicago truncatula]                              |  |  |
| Unigene 104556 | Potri.008G101800.1 | 0.5411  | 3.6921  | -2.770474 | 5.52E-17    | 2.19E-16    | Heat shock protein DnaJ [Medicago truncatula]                              |  |  |
| Unigene 30859  | Potri.004G072200.1 | 1.7331  | 12.8268 | -2.887734 | 1.81E-28    | 1.05E-27    | Heat shock protein binding protein [Arabidopsis lyrata subsp. lyrata]      |  |  |
| Unigene 117999 | Potri.001G273700.1 | 0.6544  | 4.935   | -2.914805 | 8.12E-10    | 2.29E-09    | Heat stress transcription factor B-4; AtHsfB4; AltName:AtHsf-02            |  |  |
| Unigene 13567  | Potri.007G135800.1 | 10.1829 | 77.0792 | -2.920193 | 0           | 0           | Heat shock protein DnaJ [Medicago truncatula]                              |  |  |
| Unigene 21477  | Potri.010G148900.1 | 5.2999  | 42.4836 | -3.002869 | 5.59E-211   | 3.09E-209   | Heat shock protein DnaJ [Medicago truncatula]                              |  |  |
| Unigene 104086 | Potri.005G120700.1 | 0.4325  | 3.4944  | -3.014273 | 0.00000123  | 0.0000028   | Heat shock protein binding [Arabidopsis thaliana]                          |  |  |
| Unigene 114087 | Potri.002G124800.1 | 0.5651  | 5.1754  | -3.195092 | 0.000000102 | 0.000000252 | Heat shock transcription factor (HSF) [Glycine max]                        |  |  |
| Unigene 96849  | Potri.001G416200.1 | 0.735   | 7.1264  | -3.277357 | 2.48E-15    | 9.16E-15    | Heat shock protein [Corchorus olitorius]                                   |  |  |
| Unigene 106865 | Potri.009G004300.1 | 0.3202  | 3.1907  | -3.316828 | 1.54E-08    | 4.02E-08    | cytosolic class II low molecular weight heat shock protein [Prunus dulcis] |  |  |
| Unigene 116884 | Potri.002G124800.1 | 0.444   | 5.2623  | -3.567062 | 1.71E-10    | 5.03E-10    | Heat shock transcription factor [Glycine max]                              |  |  |
| Unigene 101887 | Potri.019G083700.1 | 0.1384  | 6.3372  | -5.51693  | 1.04E-24    | 5.39E-24    | Heat shock protein binding [Arabidopsis thaliana]                          |  |  |
